# Supplementary material for: Evaluation of a High Concentrate Omega-3 for Correcting the Omega-3 Fatty Acid Nutritional Deficiency in Non-alcoholic Fatty Liver Disease and effects on Hepatic Steatosis (CONDIN)
Source: Preprints.org preprint supplement (doi:10.20944/preprints201807.0240.v1), 2018-07-13
Supplement: Supplementary file 1 [file AE.xlsx]

## Sheet: AE
AESPID	AETERM	AELLT	AELLTCD	AEPT	AEPTCD	AEHLT	AEHLTCD	AEHLGT	AEHLGTCD	AESOC	AESOCCD	AEACNOTH	AEACN	AEONGO	AEOUT	AEREL	AESER	AESEV	SUBJID	AESTDT	CDAEST	AEENDT	CDAEEN	SITE	STATUS	AGE	SEX	FIRSTDT	RANDNO	TREAT	OMEGA	DIABETE	STATIN	OMEGA_C	SFFL	SAFETY	ITT	MITT	PP	TEAE
1	abdominal pain	Abdominal pain	10000081	Abdominal pain	10000081	Gastrointestinal and abdominal pains (excl oral and throat)	10017926	Gastrointestinal signs and symptoms	10018012	Gastrointestinal disorders	10017947		Study drug temporarily stopped	Yes	Recovered / Resolved with Sequelae	Not related	No	Severe	03_002	21DEC15	21DEC2015			03	Early Termination	52	Female	30OCT15	116	Placebo	<250 mg/day	No	No	<250 mg/day	No	Yes	Yes	Yes	Yes	Yes
4	vomiting	Vomiting	10047700	Vomiting	10047700	Nausea and vomiting symptoms	10028817	Gastrointestinal signs and symptoms	10018012	Gastrointestinal disorders	10017947		Study drug temporarily stopped		Recovered / Resolved	Not related	No	Moderate	03_002	21DEC15	21DEC2015	25DEC15	25DEC2015	03	Early Termination	52	Female	30OCT15	116	Placebo	<250 mg/day	No	No	<250 mg/day	No	Yes	Yes	Yes	Yes	Yes
1	hands numb	Numbness in hand	10049681	Hypoaesthesia	10020937	Paraesthesias and dysaesthesias	10033788	Neurological disorders NEC	10029305	Nervous system disorders	10029205		None	Yes	Unknown	Not related	No	Moderate	03_003	28FEB16	28FEB2016			03	Entered	25	Male	24NOV15	121	MF4637	<250 mg/day	No	No	<250 mg/day	No	Yes	Yes	Yes	Yes	Yes
2	cold hands	Cold hands	10009860	Peripheral coldness	10034568	Peripheral vasoconstriction, necrosis and vascular insufficiency	10034640	Arteriosclerosis, stenosis, vascular insufficiency and necrosis	10003216	Vascular disorders	10047065		None	Yes	Unknown	Not related	No	Moderate	03_003	28FEB16	28FEB2016			03	Entered	25	Male	24NOV15	121	MF4637	<250 mg/day	No	No	<250 mg/day	No	Yes	Yes	Yes	Yes	Yes
1	YEAST INFECTION	Yeast infection	10049080	Fungal infection	10017533	Fungal infections NEC	10017536	Fungal infectious disorders	10017528	Infections and infestations	10021881		Medication/therapy required (include on concomitant medication sheet)		Recovered / Resolved	Not related	No	Mild	03_004	02JAN16	02JAN2016	07FEB16	07FEB2016	03	Entered	56	Female	24NOV15	118	Placebo	<250 mg/day	No	No	>=250 mg/day	No	Yes	Yes	Yes	Yes	Yes
1	sinus infection	Sinus infection	10040745	Sinusitis	10040753	Upper respiratory tract infections	10046309	Infections - pathogen unspecified	10021879	Infections and infestations	10021881		Medication/therapy required (include on concomitant medication sheet)		Recovered / Resolved	Not related	No	Mild	03_005	13JAN16	13JAN2016	22JAN16	22JAN2016	03	Early Termination	49	Female	25NOV15	119	MF4637	>=250 mg/day	No	No	<250 mg/day	No	Yes	Yes	Yes	Yes	Yes
2	allergies	Multiple allergies	10028164	Multiple allergies	10028164	Allergic conditions NEC	10027654	Allergic conditions	10001708	Immune system disorders	10021428		Medication/therapy required (include on concomitant medication sheet)		Recovered / Resolved	Not related	No	Mild	03_005	13JAN16	13JAN2016	22JAN16	22JAN2016	03	Early Termination	49	Female	25NOV15	119	MF4637	>=250 mg/day	No	No	<250 mg/day	No	Yes	Yes	Yes	Yes	Yes
3	CONSTIPATION	Constipation	10010774	Constipation	10010774	Gastrointestinal atonic and hypomotility disorders NEC	10017933	Gastrointestinal motility and defaecation conditions	10017977	Gastrointestinal disorders	10017947		Medication/therapy required (include on concomitant medication sheet)	No	Recovered / Resolved	Not related	No	Mild	03_007	31MAR16	31MAR2016			03	Entered	40	Male	19NOV15	120	Placebo	<250 mg/day	No	No	<250 mg/day	No	Yes	Yes	Yes	No	Yes
4	fatigue	Fatigue	10016256	Fatigue	10016256	Asthenic conditions	10003550	General system disorders NEC	10018073	General disorders and administration site conditions	10018065		None	Yes	Unknown	Not related	No	Mild	03_007	29FEB16	29FEB2016			03	Entered	40	Male	19NOV15	120	Placebo	<250 mg/day	No	No	<250 mg/day	No	Yes	Yes	Yes	No	Yes
5	decreased libido	Libido decreased	10024419	Libido decreased	10024419	Sexual desire disorders	10040470	Sexual dysfunctions, disturbances and gender identity disorders	10040480	Psychiatric disorders	10037175		None	Yes	Unknown	Not related	No	Mild	03_007	29FEB16	29FEB2016			03	Entered	40	Male	19NOV15	120	Placebo	<250 mg/day	No	No	<250 mg/day	No	Yes	Yes	Yes	No	Yes
1	Diarrhea	Diarrhea	10012727	Diarrhoea	10012735	Diarrhoea (excl infective)	10012736	Gastrointestinal motility and defaecation conditions	10017977	Gastrointestinal disorders	10017947		None		Recovered / Resolved	Not related	No	Moderate	03_009	05JAN16	05JAN2016	07JAN16	07JAN2016	03	Entered	40	Male	13JAN16	122	MF4637	<250 mg/day	No	No	>=250 mg/day	No	Yes	Yes	Yes	Yes	No
2	Tingling right hand	Tingling of extremity	10063451	Paraesthesia	10033775	Paraesthesias and dysaesthesias	10033788	Neurological disorders NEC	10029305	Nervous system disorders	10029205		None		Recovered / Resolved	Not related	No	Mild	03_009	09FEB16	09FEB2016	15JUN16	15JUN2016	03	Entered	40	Male	13JAN16	122	MF4637	<250 mg/day	No	No	>=250 mg/day	No	Yes	Yes	Yes	Yes	Yes
4	neck pain	Neck pain	10028836	Neck pain	10028836	Musculoskeletal and connective tissue pain and discomfort	10068757	Musculoskeletal and connective tissue disorders NEC	10028393	Musculoskeletal and connective tissue disorders	10028395	seeing chiropractor	Other (specify)		Recovered / Resolved with Sequelae	Not related	No	Mild	03_009	13APR16	13APR2016	29JUN16	29JUN2016	03	Entered	40	Male	13JAN16	122	MF4637	<250 mg/day	No	No	>=250 mg/day	No	Yes	Yes	Yes	Yes	Yes
5	right arm weakness	Weakness of arms	10050379	Muscular weakness	10028372	Muscle weakness conditions	10062913	Muscle disorders	10028302	Musculoskeletal and connective tissue disorders	10028395	seeing chiropractor	Other (specify)		Recovered / Resolved with Sequelae	Not related	No	Mild	03_009	13APR16	13APR2016	29JUN16	29JUN2016	03	Entered	40	Male	13JAN16	122	MF4637	<250 mg/day	No	No	>=250 mg/day	No	Yes	Yes	Yes	Yes	Yes
6	Right ARM PAIN	Painful R arm	10033515	Pain in extremity	10033425	Musculoskeletal and connective tissue pain and discomfort	10068757	Musculoskeletal and connective tissue disorders NEC	10028393	Musculoskeletal and connective tissue disorders	10028395		None		Recovered / Resolved	Not related	No	Mild	03_009	13APR16	13APR2016	29JUN16	29JUN2016	03	Entered	40	Male	13JAN16	122	MF4637	<250 mg/day	No	No	>=250 mg/day	No	Yes	Yes	Yes	Yes	Yes
2	epicondylitis	Epicondylitis	10014971	Epicondylitis	10014971	Muscle, tendon and ligament injuries	10028288	Injuries NEC	10022114	Injury, poisoning and procedural complications	10022117		Medication/therapy required (include on concomitant medication sheet)	Yes	Recovered / Resolved	Not related	No	Mild	03_010	15JUN16	15JUN2016			03	Entered	41	Male	12JAN16	123	Placebo	>=250 mg/day	No	No	>=250 mg/day	No	Yes	Yes	Yes	Yes	Yes
3	low calcium	Calcium blood decreased	10006951	Blood calcium decreased	10005395	Mineral and electrolyte analyses	10027637	Water, electrolyte and mineral investigations	10047843	Investigations	10022891		None		Recovered / Resolved	Not related	No	Mild	03_010	24JUN16	24JUN2016	19JUL16	19JUL2016	03	Entered	41	Male	12JAN16	123	Placebo	>=250 mg/day	No	No	>=250 mg/day	No	Yes	Yes	Yes	Yes	Yes
1	Upper respiratory infection	Upper respiratory infection	10046300	Upper respiratory tract infection	10046306	Upper respiratory tract infections	10046309	Infections - pathogen unspecified	10021879	Infections and infestations	10021881		Medication/therapy required (include on concomitant medication sheet)		Recovered / Resolved with Sequelae	Not related	No	Mild	03_011	29FEB16	29FEB2016	01MAR16	01MAR2016	03	Entered	55	Male	11FEB16	188	MF4637	<250 mg/day	No	Yes	<250 mg/day	No	Yes	Yes	Yes	Yes	Yes
2	PHARYNGITIS	Pharyngitis	10034835	Pharyngitis	10034835	Upper respiratory tract infections	10046309	Infections - pathogen unspecified	10021879	Infections and infestations	10021881		Medication/therapy required (include on concomitant medication sheet)		Recovered / Resolved with Sequelae	Not related	No	Mild	03_011	08FEB16	08FEB2016	29FEB16	29FEB2016	03	Entered	55	Male	11FEB16	188	MF4637	<250 mg/day	No	Yes	<250 mg/day	No	Yes	Yes	Yes	Yes	No
3	DIAHERRA	Diarrhea	10012727	Diarrhoea	10012735	Diarrhoea (excl infective)	10012736	Gastrointestinal motility and defaecation conditions	10017977	Gastrointestinal disorders	10017947		Medication/therapy required (include on concomitant medication sheet)		Recovered / Resolved with Sequelae	Not related	No	Moderate	03_011	04MAY16	04MAY2016	07MAY16	07MAY2016	03	Entered	55	Male	11FEB16	188	MF4637	<250 mg/day	No	Yes	<250 mg/day	No	Yes	Yes	Yes	Yes	Yes
1	fever	Fever	10016558	Pyrexia	10037660	Febrile disorders	10016286	Body temperature conditions	10005908	General disorders and administration site conditions	10018065		Medication/therapy required (include on concomitant medication sheet)		Recovered / Resolved	Not related	No	Mild	03_012	26MAR16	26MAR2016	07APR16	07APR2016	03	Entered	63	Male	12FEB16	190	MF4637	<250 mg/day	No	Yes	<250 mg/day	No	Yes	Yes	Yes	Yes	Yes
2	chills	Chills	10008531	Chills	10008531	Feelings and sensations NEC	10068759	General system disorders NEC	10018073	General disorders and administration site conditions	10018065		Medication/therapy required (include on concomitant medication sheet)		Recovered / Resolved	Not related	No	Mild	03_012	26MAR16	26MAR2016	07APR16	07APR2016	03	Entered	63	Male	12FEB16	190	MF4637	<250 mg/day	No	Yes	<250 mg/day	No	Yes	Yes	Yes	Yes	Yes
3	frequate urination	Polyuria	10036142	Polyuria	10036142	Urinary tract signs and symptoms NEC	10046591	Urinary tract signs and symptoms	10046590	Renal and urinary disorders	10038359		Medication/therapy required (include on concomitant medication sheet)		Recovered / Resolved	Not related	No	Mild	03_012	26MAR16	26MAR2016	07APR16	07APR2016	03	Entered	63	Male	12FEB16	190	MF4637	<250 mg/day	No	Yes	<250 mg/day	No	Yes	Yes	Yes	Yes	Yes
4	Prostate infection	Prostate infection	10050662	Prostate infection	10050662	Male reproductive tract infections	10038587	Infections - pathogen unspecified	10021879	Infections and infestations	10021881		Medication/therapy required (include on concomitant medication sheet)		Recovered / Resolved	Not related	No	Mild	03_012	25MAY16	25MAY2016	04JUN16	04JUN2016	03	Entered	63	Male	12FEB16	190	MF4637	<250 mg/day	No	Yes	<250 mg/day	No	Yes	Yes	Yes	Yes	Yes
5	fishey burps	Burping	10006804	Eructation	10015137	Dyspeptic signs and symptoms	10013949	Gastrointestinal signs and symptoms	10018012	Gastrointestinal disorders	10017947		None	Yes	Not Recovered / Not Resolved	Suspected	No	Mild	03_012	28MAY16	28MAY2016			03	Entered	63	Male	12FEB16	190	MF4637	<250 mg/day	No	Yes	<250 mg/day	No	Yes	Yes	Yes	Yes	Yes
6	strained lower back	Low back strain	10024893	Muscle strain	10050031	Muscle, tendon and ligament injuries	10028288	Injuries NEC	10022114	Injury, poisoning and procedural complications	10022117		None		Recovered / Resolved	Not related	No	Mild	03_012	11JUN16	11JUN2016	20JUN16	20JUN2016	03	Entered	63	Male	12FEB16	190	MF4637	<250 mg/day	No	Yes	<250 mg/day	No	Yes	Yes	Yes	Yes	Yes
1	bronchitis	Bronchitis	10006451	Bronchitis	10006451	Lower respiratory tract and lung infections	10025101	Infections - pathogen unspecified	10021879	Infections and infestations	10021881		Medication/therapy required (include on concomitant medication sheet)		Recovered / Resolved with Sequelae	Not related	No	Mild	03_013	24FEB16	24FEB2016	05MAR16	05MAR2016	03	Entered	61	Female	11FEB16	189	Placebo	<250 mg/day	No	Yes	<250 mg/day	No	Yes	Yes	Yes	Yes	Yes
2	cough	Cough	10011224	Cough	10011224	Coughing and associated symptoms	10011233	Respiratory disorders NEC	10038716	Respiratory, thoracic and mediastinal disorders	10038738		Medication/therapy required (include on concomitant medication sheet)		Recovered / Resolved with Sequelae	Not related	No	Mild	03_013	27APR16	27APR2016	02MAY16	02MAY2016	03	Entered	61	Female	11FEB16	189	Placebo	<250 mg/day	No	Yes	<250 mg/day	No	Yes	Yes	Yes	Yes	Yes
3	swelling in feet	Swelling of feet	10042693	Peripheral swelling	10048959	General signs and symptoms NEC	10018072	General system disorders NEC	10018073	General disorders and administration site conditions	10018065		Medication/therapy required (include on concomitant medication sheet)		Recovered / Resolved with Sequelae	Not related	No	Mild	03_013	27APR16	27APR2016	02MAY16	02MAY2016	03	Entered	61	Female	11FEB16	189	Placebo	<250 mg/day	No	Yes	<250 mg/day	No	Yes	Yes	Yes	Yes	Yes
4	bang her head ON book	Head injury	10019196	Head injury	10019196	Site specific injuries NEC	10040759	Injuries NEC	10022114	Injury, poisoning and procedural complications	10022117		Medication/therapy required (include on concomitant medication sheet)		Recovered / Resolved	Not related	No	Mild	03_013	15APR16	15APR2016	18APR16	18APR2016	03	Entered	61	Female	11FEB16	189	Placebo	<250 mg/day	No	Yes	<250 mg/day	No	Yes	Yes	Yes	Yes	Yes
5	ache legs	Aches & pains in legs	10000431	Pain in extremity	10033425	Musculoskeletal and connective tissue pain and discomfort	10068757	Musculoskeletal and connective tissue disorders NEC	10028393	Musculoskeletal and connective tissue disorders	10028395		None		Recovered / Resolved	Not related	No	Mild	03_013	19APR16	19APR2016	19APR16	19APR2016	03	Entered	61	Female	11FEB16	189	Placebo	<250 mg/day	No	Yes	<250 mg/day	No	Yes	Yes	Yes	Yes	Yes
1	Elevated LFT	Raised LFTs	10037822	Liver function test increased	10077692	Liver function analyses	10024689	Hepatobiliary investigations	10019809	Investigations	10022891		None		Recovered / Resolved	Not related	No	Mild	04_004	08JAN16	08JAN2016	18JUN16	18JUN2016	04	Entered	34	Male	15OCT15	125	MF4637	<250 mg/day	No	No	<250 mg/day	No	Yes	Yes	Yes	No	Yes
1	Elevated alkaline phosphate	Alkaline phosphatase increased	10001675	Blood alkaline phosphatase increased	10059570	Tissue enzyme analyses NEC	10043891	Enzyme investigations NEC	10014938	Investigations	10022891		None	Yes	Not Recovered / Not Resolved	Not related	No	Mild	04_010	05JAN16	05JAN2016			04	Entered	25	Female	05JAN16	126	MF4637	>=250 mg/day	No	No	>=250 mg/day	No	Yes	Yes	Yes	Yes	Yes
1	Elevated blood glucose	Blood glucose increased	10005557	Blood glucose increased	10005557	Carbohydrate tolerance analyses (incl diabetes)	10007217	Metabolic, nutritional and blood gas investigations	10027432	Investigations	10022891		None		Recovered / Resolved	Not related	No	Mild	04_011	26JAN16	26JAN2016	12JUL16	12JUL2016	04	Entered	41	Male	26JAN16	129	Placebo	>=250 mg/day	No	No	>=250 mg/day	No	Yes	Yes	Yes	Yes	Yes
1	chest Pain	Chest pain	10008479	Chest pain	10008479	Pain and discomfort NEC	10033372	General system disorders NEC	10018073	General disorders and administration site conditions	10018065		None		Recovered / Resolved	Not related	No	Moderate	04_015	14JUN16	14JUN2016	15JUN16	15JUN2016	04	Entered	50	Male	21MAR16	198	Placebo	<250 mg/day	No	Yes	<250 mg/day	No	Yes	Yes	Yes	No	Yes
1	worsening of diabetes mellutis	Diabetes mellitus exacerbated	10012605	Diabetes mellitus	10012601	Diabetes mellitus (incl subtypes)	10012602	Glucose metabolism disorders (incl diabetes mellitus)	10018424	Metabolism and nutrition disorders	10027433		None		Recovered / Resolved	Not related	No	Mild	04_025	25AUG16	25AUG2016	18NOV16	18NOV2016	04	Entered	49	Male	25AUG16	203	MF4637	<250 mg/day	No	No	<250 mg/day	No	Yes	Yes	Yes	Yes	Yes
1	COPD Exacerbation	COPD exacerbation	10010953	Chronic obstructive pulmonary disease	10009033	Bronchospasm and obstruction	10006484	Bronchial disorders (excl neoplasms)	10006436	Respiratory, thoracic and mediastinal disorders	10038738		Study drug temporarily stopped		Recovered / Resolved	Not related	Yes	Severe	09_024	17MAR17	17MAR2017	30MAR17	30MAR2017	09	Entered	47	Male	04OCT16	168	Placebo	>=250 mg/day	Yes	No	<250 mg/day	No	Yes	Yes	Yes	No	Yes
2	Chronic heart failure	Chronic heart failure	10008908	Cardiac failure chronic	10007558	Heart failures NEC	10019281	Heart failures	10019280	Cardiac disorders	10007541		None		Recovered / Resolved	Not related	Yes	Severe	09_024	17MAR17	17MAR2017	30MAR17	30MAR2017	09	Entered	47	Male	04OCT16	168	Placebo	>=250 mg/day	Yes	No	<250 mg/day	No	Yes	Yes	Yes	No	Yes
1	Intermittent headache	Intermittent headache	10059296	Headache	10019211	Headaches NEC	10019233	Headaches	10019231	Nervous system disorders	10029205		None		Recovered / Resolved	Not related	No	Mild	10_004	05FEB16	05FEB2016	06FEB16	06FEB2016	10	Entered	47	Male	01FEB16	172	MF4637	>=250 mg/day	No	No	>=250 mg/day	No	Yes	Yes	Yes	Yes	Yes
2	Acne on back	Acne	10000496	Acne	10000496	Acnes	10000497	Skin appendage conditions	10040798	Skin and subcutaneous tissue disorders	10040785		Medication/therapy required (include on concomitant medication sheet)		Recovered / Resolved	Not related	No	Moderate	10_004	27FEB16	27FEB2016	01JUL16	01JUL2016	10	Entered	47	Male	01FEB16	172	MF4637	>=250 mg/day	No	No	>=250 mg/day	No	Yes	Yes	Yes	Yes	Yes
1	Left calf pain	Calf pain	10007031	Pain in extremity	10033425	Musculoskeletal and connective tissue pain and discomfort	10068757	Musculoskeletal and connective tissue disorders NEC	10028393	Musculoskeletal and connective tissue disorders	10028395		None		Recovered / Resolved	Not related	No	Mild	10_006	01APR16	01APR2016	03APR16	03APR2016	10	Entered	55	Male	25FEB16	174	Placebo	<250 mg/day	No	No	<250 mg/day	No	Yes	Yes	Yes	Yes	Yes
2	Left lower quadrant pain	Left lower quadrant pain	10052347	Abdominal pain lower	10000084	Gastrointestinal and abdominal pains (excl oral and throat)	10017926	Gastrointestinal signs and symptoms	10018012	Gastrointestinal disorders	10017947		None		Recovered / Resolved	Not related	No	Moderate	10_006	05MAY16	05MAY2016	01JUN16	01JUN2016	10	Entered	55	Male	25FEB16	174	Placebo	<250 mg/day	No	No	<250 mg/day	No	Yes	Yes	Yes	Yes	Yes
1	headache	Headache	10019211	Headache	10019211	Headaches NEC	10019233	Headaches	10019231	Nervous system disorders	10029205		Medication/therapy required (include on concomitant medication sheet)		Recovered / Resolved	Not related	No	Mild	10_009	01AUG16	01AUG2016	01AUG16	01AUG2016	10	Entered	64	Female	27JUN16	176	MF4637	<250 mg/day	No	No	<250 mg/day	No	Yes	Yes	Yes	Yes	Yes
2	Headache	Headache	10019211	Headache	10019211	Headaches NEC	10019233	Headaches	10019231	Nervous system disorders	10029205		Medication/therapy required (include on concomitant medication sheet)		Recovered / Resolved	Not related	No	Mild	10_009	16AUG16	16AUG2016	16AUG16	16AUG2016	10	Entered	64	Female	27JUN16	176	MF4637	<250 mg/day	No	No	<250 mg/day	No	Yes	Yes	Yes	Yes	Yes
3	onychia left great toe	Onychia	10030333	Paronychia	10034016	Skin structures and soft tissue infections	10040786	Infections - pathogen unspecified	10021879	Infections and infestations	10021881		Medication/therapy required (include on concomitant medication sheet)	Yes	Not Recovered / Not Resolved	Not related	No	Mild	10_009	12DEC16	12DEC2016			10	Entered	64	Female	27JUN16	176	MF4637	<250 mg/day	No	No	<250 mg/day	No	Yes	Yes	Yes	Yes	Yes
4	dermatosis bilateral lower extremities	Dermatosis	10048768	Dermatosis	10048768	Dermal and epidermal conditions NEC	10012424	Epidermal and dermal conditions	10014982	Skin and subcutaneous tissue disorders	10040785		None	Yes	Not Recovered / Not Resolved	Not related	No	Mild	10_009	12DEC16	12DEC2016			10	Entered	64	Female	27JUN16	176	MF4637	<250 mg/day	No	No	<250 mg/day	No	Yes	Yes	Yes	Yes	Yes
1	hypertryglyceridemia	Hypertriglyceridemia	10020870	Hypertriglyceridaemia	10020869	Elevated triglycerides	10014486	Lipid metabolism disorders	10013317	Metabolism and nutrition disorders	10027433		None	Yes	Not Recovered / Not Resolved	Not related	No	Mild	10_010	27SEP16	27SEP2016			10	Entered	34	Male	27SEP16	175	Placebo	>=250 mg/day	No	No	>=250 mg/day	No	Yes	Yes	Yes	Yes	Yes
1	UPPER RESP INFECTION	Upper respiratory infection	10046300	Upper respiratory tract infection	10046306	Upper respiratory tract infections	10046309	Infections - pathogen unspecified	10021879	Infections and infestations	10021881		None		Recovered / Resolved	Not related	No	Mild	11_004	12OCT16	12OCT2016	28NOV16	28NOV2016	11	Entered	42	Female	02SEP16	140	MF4637	<250 mg/day	Yes	No	<250 mg/day	No	Yes	Yes	Yes	Yes	Yes
2	CONSTIPATION	Constipation	10010774	Constipation	10010774	Gastrointestinal atonic and hypomotility disorders NEC	10017933	Gastrointestinal motility and defaecation conditions	10017977	Gastrointestinal disorders	10017947		None		Recovered / Resolved	Not related	No	Mild	11_004	23SEP16	23SEP2016	24SEP16	24SEP2016	11	Entered	42	Female	02SEP16	140	MF4637	<250 mg/day	Yes	No	<250 mg/day	No	Yes	Yes	Yes	Yes	Yes
3	CONSTIPATION	Constipation	10010774	Constipation	10010774	Gastrointestinal atonic and hypomotility disorders NEC	10017933	Gastrointestinal motility and defaecation conditions	10017977	Gastrointestinal disorders	10017947		None		Recovered / Resolved	Not related	No	Mild	11_004	29SEP16	29SEP2016	30SEP16	30SEP2016	11	Entered	42	Female	02SEP16	140	MF4637	<250 mg/day	Yes	No	<250 mg/day	No	Yes	Yes	Yes	Yes	Yes
1	WORSENING OF HYPERLIPIDEMA	Lipids increased	10024592	Lipids increased	10024592	Lipoprotein and lipid tests NEC	10024624	Lipid analyses	10024580	Investigations	10022891		Medication/therapy required (include on concomitant medication sheet)		Recovered / Resolved	Not related	No	Moderate	11_006	14OCT16	14OCT2016	20MAR17	20MAR2017	11	Entered	54	Female	29SEP16	146	Placebo	<250 mg/day	Yes	No	>=250 mg/day	No	Yes	Yes	Yes	Yes	Yes
2	CONSTIPATION	Constipation	10010774	Constipation	10010774	Gastrointestinal atonic and hypomotility disorders NEC	10017933	Gastrointestinal motility and defaecation conditions	10017977	Gastrointestinal disorders	10017947		None		Recovered / Resolved	Not related	No	Mild	11_006	15OCT16	15OCT2016	17OCT16	17OCT2016	11	Entered	54	Female	29SEP16	146	Placebo	<250 mg/day	Yes	No	>=250 mg/day	No	Yes	Yes	Yes	Yes	Yes
3	DRY MOUTH	Dry mouth	10013781	Dry mouth	10013781	Oral dryness and saliva altered	10030975	Salivary gland conditions	10039404	Gastrointestinal disorders	10017947		None		Recovered / Resolved	Not related	No	Mild	11_006	15JAN17	15JAN2017	16MAR17	16MAR2017	11	Entered	54	Female	29SEP16	146	Placebo	<250 mg/day	Yes	No	>=250 mg/day	No	Yes	Yes	Yes	Yes	Yes
1	STOMACH GAS PAIN	Pain gastric	10033402	Abdominal pain upper	10000087	Gastrointestinal and abdominal pains (excl oral and throat)	10017926	Gastrointestinal signs and symptoms	10018012	Gastrointestinal disorders	10017947		None		Recovered / Resolved	Not related	No	Moderate	11_011	19OCT16	19OCT2016	23OCT16	23OCT2016	11	Entered	41	Female	19OCT16	244	Placebo	<250 mg/day	No	No	>=250 mg/day	No	Yes	Yes	Yes	Yes	Yes
2	ABDOMINAL PAIN	Abdominal pain	10000081	Abdominal pain	10000081	Gastrointestinal and abdominal pains (excl oral and throat)	10017926	Gastrointestinal signs and symptoms	10018012	Gastrointestinal disorders	10017947		None		Recovered / Resolved	Not related	No	Moderate	11_011	19OCT16	19OCT2016	23OCT16	23OCT2016	11	Entered	41	Female	19OCT16	244	Placebo	<250 mg/day	No	No	>=250 mg/day	No	Yes	Yes	Yes	Yes	Yes
3	VOMIT	Vomiting	10047700	Vomiting	10047700	Nausea and vomiting symptoms	10028817	Gastrointestinal signs and symptoms	10018012	Gastrointestinal disorders	10017947		None		Recovered / Resolved	Not related	No	Moderate	11_011	24OCT16	24OCT2016	24OCT16	24OCT2016	11	Entered	41	Female	19OCT16	244	Placebo	<250 mg/day	No	No	>=250 mg/day	No	Yes	Yes	Yes	Yes	Yes
4	ABDOMINAL PAIN	Abdominal pain	10000081	Abdominal pain	10000081	Gastrointestinal and abdominal pains (excl oral and throat)	10017926	Gastrointestinal signs and symptoms	10018012	Gastrointestinal disorders	10017947		None		Recovered / Resolved	Not related	No	Moderate	11_011	25OCT16	25OCT2016	25OCT16	25OCT2016	11	Entered	41	Female	19OCT16	244	Placebo	<250 mg/day	No	No	>=250 mg/day	No	Yes	Yes	Yes	Yes	Yes
5	DIARRHEA	Diarrhea	10012727	Diarrhoea	10012735	Diarrhoea (excl infective)	10012736	Gastrointestinal motility and defaecation conditions	10017977	Gastrointestinal disorders	10017947		None		Recovered / Resolved	Not related	No	Moderate	11_011	25OCT16	25OCT2016	25OCT16	25OCT2016	11	Entered	41	Female	19OCT16	244	Placebo	<250 mg/day	No	No	>=250 mg/day	No	Yes	Yes	Yes	Yes	Yes
6	DIARRHEA	Diarrhea	10012727	Diarrhoea	10012735	Diarrhoea (excl infective)	10012736	Gastrointestinal motility and defaecation conditions	10017977	Gastrointestinal disorders	10017947		None		Recovered / Resolved	Not related	No	Moderate	11_011	24FEB17	24FEB2017	26FEB17	26FEB2017	11	Entered	41	Female	19OCT16	244	Placebo	<250 mg/day	No	No	>=250 mg/day	No	Yes	Yes	Yes	Yes	Yes
7	DIARRHEA	Diarrhea	10012727	Diarrhoea	10012735	Diarrhoea (excl infective)	10012736	Gastrointestinal motility and defaecation conditions	10017977	Gastrointestinal disorders	10017947		None		Recovered / Resolved	Not related	No	Moderate	11_011	06MAR17	06MAR2017	06MAR17	06MAR2017	11	Entered	41	Female	19OCT16	244	Placebo	<250 mg/day	No	No	>=250 mg/day	No	Yes	Yes	Yes	Yes	Yes
8	ABDOMINAL PAIN	Abdominal pain	10000081	Abdominal pain	10000081	Gastrointestinal and abdominal pains (excl oral and throat)	10017926	Gastrointestinal signs and symptoms	10018012	Gastrointestinal disorders	10017947		None		Recovered / Resolved	Not related	No	Moderate	11_011	15MAR17	15MAR2017	17MAR17	17MAR2017	11	Entered	41	Female	19OCT16	244	Placebo	<250 mg/day	No	No	>=250 mg/day	No	Yes	Yes	Yes	Yes	Yes
1	BREAST LUMP	Breast lump	10006264	Breast mass	10006272	Breast disorders NEC	10040675	Breast disorders	10006232	Reproductive system and breast disorders	10038604		Study drug temporarily stopped		Recovered / Resolved	Not related	No	Mild	11_012	10OCT16	10OCT2016	15OCT16	15OCT2016	11	Entered	40	Female	18OCT16	145	MF4637	<250 mg/day	No	No	<250 mg/day	No	Yes	Yes	Yes	Yes	No
1	DIARRHEA	Diarrhea	10012727	Diarrhoea	10012735	Diarrhoea (excl infective)	10012736	Gastrointestinal motility and defaecation conditions	10017977	Gastrointestinal disorders	10017947		None		Recovered / Resolved	Suspected	No	Moderate	11_014	16NOV16	16NOV2016	22NOV16	22NOV2016	11	Entered	49	Female	17NOV16	247	Placebo	>=250 mg/day	No	No	>=250 mg/day	No	Yes	Yes	Yes	No	No
1	UPPER RIGHT CUADRANT DULL PAIN	Right upper quadrant pain	10039162	Abdominal pain upper	10000087	Gastrointestinal and abdominal pains (excl oral and throat)	10017926	Gastrointestinal signs and symptoms	10018012	Gastrointestinal disorders	10017947		None		Recovered / Resolved	Not related	No	Moderate	11_015	17FEB17	17FEB2017	20FEB17	20FEB2017	11	Entered	62	Male	10NOV16	245	MF4637	<250 mg/day	No	No	>=250 mg/day	No	Yes	Yes	Yes	Yes	Yes
2	HEARTBURN	Heartburn	10019326	Dyspepsia	10013946	Dyspeptic signs and symptoms	10013949	Gastrointestinal signs and symptoms	10018012	Gastrointestinal disorders	10017947		None		Recovered / Resolved	Not related	No	Moderate	11_015	15FEB17	15FEB2017	09MAY17	09MAY2017	11	Entered	62	Male	10NOV16	245	MF4637	<250 mg/day	No	No	>=250 mg/day	No	Yes	Yes	Yes	Yes	Yes
1	UPPER RESPIRATORY TRACT INFECTION	Upper respiratory tract infection	10046306	Upper respiratory tract infection	10046306	Upper respiratory tract infections	10046309	Infections - pathogen unspecified	10021879	Infections and infestations	10021881		Medication/therapy required (include on concomitant medication sheet)		Recovered / Resolved	Not related	No	Mild	12_001	18NOV16	18NOV2016	24NOV16	24NOV2016	12	Entered	66	Male	14OCT16	257	MF4637	>=250 mg/day	Yes	Yes	>=250 mg/day	No	Yes	Yes	Yes	Yes	Yes
1	UPPER RESPIRATORY TRACT INFECTION	Upper respiratory tract infection	10046306	Upper respiratory tract infection	10046306	Upper respiratory tract infections	10046309	Infections - pathogen unspecified	10021879	Infections and infestations	10021881		None		Recovered / Resolved	Not related	No	Moderate	12_016	14MAR17	14MAR2017	11APR17	11APR2017	12	Entered	52	Female	05OCT16	103	MF4637	<250 mg/day	No	No	<250 mg/day	No	Yes	Yes	Yes	Yes	Yes
1	ACUTE VIRAL SYNDROME	Viral syndrome	10063099	Viral infection	10047461	Viral infections NEC	10047465	Viral infectious disorders	10047438	Infections and infestations	10021881		None		Recovered / Resolved	Not related	No	Mild	12_020	25DEC16	25DEC2016	02JAN17	02JAN2017	12	Entered	60	Female	05OCT16	101	MF4637	>=250 mg/day	Yes	Yes	>=250 mg/day	No	Yes	Yes	Yes	Yes	Yes
1	HEADACHE	Headache	10019211	Headache	10019211	Headaches NEC	10019233	Headaches	10019231	Nervous system disorders	10029205		Subject discontinued from study		Recovered / Resolved	Not related	No	Mild	12_041	25NOV16	25NOV2016	30NOV16	30NOV2016	12	Early Termination	54	Female	10NOV16	293	Placebo	>=250 mg/day	Yes	Yes	>=250 mg/day	No	Yes	Yes	Yes	Yes	Yes
2	ABDOMINAL BLOATING	Abdominal bloating	10048746	Abdominal distension	10000060	Flatulence, bloating and distension	10016770	Gastrointestinal signs and symptoms	10018012	Gastrointestinal disorders	10017947		Subject discontinued from study		Recovered / Resolved	Suspected	No	Mild	12_041	25NOV16	25NOV2016	30NOV16	30NOV2016	12	Early Termination	54	Female	10NOV16	293	Placebo	>=250 mg/day	Yes	Yes	>=250 mg/day	No	Yes	Yes	Yes	Yes	Yes
1	CLAUSTROPHOBIA	Claustrophobia	10009244	Claustrophobia	10009244	Fear symptoms and phobic disorders (incl social phobia)	10068299	Anxiety disorders and symptoms	10002861	Psychiatric disorders	10037175		None		Recovered / Resolved	Not related	No	Mild	12_043	20APR17	20APR2017	20APR17	20APR2017	12	Entered	77	Male	03NOV16	283	MF4637	>=250 mg/day	Yes	Yes	>=250 mg/day	No	Yes	Yes	Yes	Yes	Yes
1	RIGHT LEG DEEP VEIN THROMBOSIS	Deep vein thrombosis leg	10065052	Deep vein thrombosis	10051055	Peripheral embolism and thrombosis	10034572	Embolism and thrombosis	10014523	Vascular disorders	10047065		Medication/therapy required (include on concomitant medication sheet)		Recovered / Resolved	Not related	Yes	Severe	12_056	25DEC16	25DEC2016	05JAN17	05JAN2017	12	Early Termination	61	Male	03NOV16	287	Placebo	<250 mg/day	Yes	Yes	<250 mg/day	No	Yes	Yes	Yes	Yes	Yes
2	ACUTE WORSENING OF HYPERTENSION	Hypertension worsened	10020799	Hypertension	10020772	Vascular hypertensive disorders NEC	10020774	Vascular hypertensive disorders	10057166	Vascular disorders	10047065		None		Recovered / Resolved	Not related	No	Mild	12_056	03JAN17	03JAN2017	03JAN17	03JAN2017	12	Early Termination	61	Male	03NOV16	287	Placebo	<250 mg/day	Yes	Yes	<250 mg/day	No	Yes	Yes	Yes	Yes	Yes
3	RIGHT RENAL CYST	Renal cyst	10038423	Renal cyst	10038423	Renal neoplasms	10038486	Renal disorders (excl nephropathies)	10038430	Renal and urinary disorders	10038359		None	Yes	Not Recovered / Not Resolved	Not related	No	Mild	12_056	05JAN17	05JAN2017			12	Early Termination	61	Male	03NOV16	287	Placebo	<250 mg/day	Yes	Yes	<250 mg/day	No	Yes	Yes	Yes	Yes	Yes
1	DIARRHEA	Diarrhea	10012727	Diarrhoea	10012735	Diarrhoea (excl infective)	10012736	Gastrointestinal motility and defaecation conditions	10017977	Gastrointestinal disorders	10017947		None		Recovered / Resolved	Not related	No	Mild	12_057	27APR17	27APR2017	28APR17	28APR2017	12	Entered	65	Female	10NOV16	294	Placebo	<250 mg/day	Yes	No	<250 mg/day	No	Yes	Yes	Yes	Yes	Yes
1	Elevated TSH	Increased TSH	10021690	Blood thyroid stimulating hormone increased	10005833	Pituitary analyses anterior	10035089	Endocrine investigations (incl sex hormones)	10014706	Investigations	10022891		Medication/therapy required (include on concomitant medication sheet)		Recovered / Resolved	Not related	No	Moderate	13_003	05APR17	05APR2017	23MAY17	23MAY2017	13	Entered	65	Female	20OCT16	205	Placebo	<250 mg/day	Yes	Yes	<250 mg/day	No	Yes	Yes	Yes	Yes	Yes
2	Hypothyroidism	Hypothyroidism	10021114	Hypothyroidism	10021114	Thyroid hypofunction disorders	10043741	Thyroid gland disorders	10043739	Endocrine disorders	10014698		Medication/therapy required (include on concomitant medication sheet)	Yes	Not Recovered / Not Resolved	Not related	No	Moderate	13_003	09MAY17	09MAY2017			13	Entered	65	Female	20OCT16	205	Placebo	<250 mg/day	Yes	Yes	<250 mg/day	No	Yes	Yes	Yes	Yes	Yes
1	Fishy Taste	Medication after taste	10067060	Dysgeusia	10013911	Sensory abnormalities NEC	10040021	Neurological disorders NEC	10029305	Nervous system disorders	10029205		None	Yes	Not Recovered / Not Resolved	Related	No	Mild	13_004	19OCT16	19OCT2016			13	Entered	69	Female	20OCT16	206	MF4637	<250 mg/day	No	Yes	<250 mg/day	No	Yes	Yes	Yes	Yes	No
1	Diarrhea	Diarrhea	10012727	Diarrhoea	10012735	Diarrhoea (excl infective)	10012736	Gastrointestinal motility and defaecation conditions	10017977	Gastrointestinal disorders	10017947		Medication/therapy required (include on concomitant medication sheet)		Recovered / Resolved	Not related	No	Mild	13_015	30DEC16	30DEC2016	31DEC16	31DEC2016	13	Entered	75	Male	03NOV16	264	MF4637	<250 mg/day	No	Yes	<250 mg/day	No	Yes	Yes	Yes	Yes	Yes
1	Elevated Triglycerides	Triglycerides elevated serum	10044664	Blood triglycerides increased	10005839	Triglyceride analyses	10044657	Lipid analyses	10024580	Investigations	10022891		None		Recovered / Resolved with Sequelae	Not related	No	Mild	14_001	25OCT16	25OCT2016	11APR17	11APR2017	14	Entered	61	Male	25OCT16	185	Placebo	>=250 mg/day	No	Yes	>=250 mg/day	No	Yes	Yes	Yes	Yes	Yes
2	panic attack due to claustrophobia	Claustrophobia	10009244	Claustrophobia	10009244	Fear symptoms and phobic disorders (incl social phobia)	10068299	Anxiety disorders and symptoms	10002861	Psychiatric disorders	10037175		None		Recovered / Resolved with Sequelae	Not related	No	Mild	14_001	11APR17	11APR2017	13APR17	13APR2017	14	Entered	61	Male	25OCT16	185	Placebo	>=250 mg/day	No	Yes	>=250 mg/day	No	Yes	Yes	Yes	Yes	Yes
1	Flu	Flu	10016790	Influenza	10022000	Influenza viral infections	10022005	Viral infectious disorders	10047438	Infections and infestations	10021881		None		Recovered / Resolved	Not related	No	Mild	14_002	31DEC16	31DEC2016	09JAN17	09JAN2017	14	Entered	44	Female	12OCT16	208	MF4637	<250 mg/day	No	Yes	>=250 mg/day	No	Yes	Yes	Yes	Yes	Yes
2	Elevated Triglycerides	Triglycerides elevated serum	10044664	Blood triglycerides increased	10005839	Triglyceride analyses	10044657	Lipid analyses	10024580	Investigations	10022891		None		Recovered / Resolved	Suspected	No	Mild	14_002	12OCT16	12OCT2016	24MAR17	24MAR2017	14	Entered	44	Female	12OCT16	208	MF4637	<250 mg/day	No	Yes	>=250 mg/day	No	Yes	Yes	Yes	Yes	Yes
1	common cold	Common cold	10010106	Viral upper respiratory tract infection	10047482	Viral infections NEC	10047465	Viral infectious disorders	10047438	Infections and infestations	10021881		Medication/therapy required (include on concomitant medication sheet)		Recovered / Resolved	Not related	No	Mild	14_012	01NOV16	01NOV2016	09NOV16	09NOV2016	14	Early Termination	34	Male	15NOV16	186	Placebo	<250 mg/day	No	No	>=250 mg/day	No	Yes	Yes	Yes	Yes	No
2	Elevated Gamma (GT)	Gamma GT increased	10017670	Gamma-glutamyltransferase increased	10017693	Liver function analyses	10024689	Hepatobiliary investigations	10019809	Investigations	10022891		None		Recovered / Resolved	Not related	No	Mild	14_012	04NOV16	04NOV2016	16FEB17	16FEB2017	14	Early Termination	34	Male	15NOV16	186	Placebo	<250 mg/day	No	No	>=250 mg/day	No	Yes	Yes	Yes	Yes	No
3	Elevated Ast	Aspartate aminotransferase increased	10003481	Aspartate aminotransferase increased	10003481	Liver function analyses	10024689	Hepatobiliary investigations	10019809	Investigations	10022891		None		Recovered / Resolved	Not related	No	Mild	14_012	04NOV16	04NOV2016	16FEB17	16FEB2017	14	Early Termination	34	Male	15NOV16	186	Placebo	<250 mg/day	No	No	>=250 mg/day	No	Yes	Yes	Yes	Yes	No
4	Elevated Alt	Alanine aminotransferase increased	10001551	Alanine aminotransferase increased	10001551	Liver function analyses	10024689	Hepatobiliary investigations	10019809	Investigations	10022891		None		Recovered / Resolved	Not related	No	Mild	14_012	04NOV16	04NOV2016	16FEB17	16FEB2017	14	Early Termination	34	Male	15NOV16	186	Placebo	<250 mg/day	No	No	>=250 mg/day	No	Yes	Yes	Yes	Yes	No
1	Common Cold	Common cold	10010106	Viral upper respiratory tract infection	10047482	Viral infections NEC	10047465	Viral infectious disorders	10047438	Infections and infestations	10021881		None		Recovered / Resolved	Not related	No	Mild	14_014	30JAN17	30JAN2017	05FEB17	05FEB2017	14	Entered	33	Female	16NOV16	187	MF4637	<250 mg/day	No	No	>=250 mg/day	No	Yes	Yes	Yes	Yes	Yes
1	worsening of fecal incontinence	Fecal incontinence aggravated	10055507	Anal incontinence	10077605	Gastrointestinal signs and symptoms NEC	10027678	Gastrointestinal signs and symptoms	10018012	Gastrointestinal disorders	10017947	Sphincteroplasty done	Other (specify)		Recovered / Resolved	Not related	No	Mild	14_016	14MAR17	14MAR2017	14MAR17	14MAR2017	14	Entered	51	Female	01DEC16	209	Placebo	<250 mg/day	No	No	<250 mg/day	No	Yes	Yes	Yes	Yes	Yes
1	Cough	Cough	10011224	Cough	10011224	Coughing and associated symptoms	10011233	Respiratory disorders NEC	10038716	Respiratory, thoracic and mediastinal disorders	10038738		None		Recovered / Resolved	Not related	No	Mild	16_002	19JAN17	19JAN2017	30JAN17	30JAN2017	16	Early Termination	53	Male	03NOV16	154	MF4637	<250 mg/day	No	No	<250 mg/day	No	Yes	Yes	Yes	Yes	Yes
2	Runny Nose	Runny nose	10039296	Rhinorrhoea	10039101	Upper respiratory tract signs and symptoms	10046313	Respiratory tract signs and symptoms	10079101	Respiratory, thoracic and mediastinal disorders	10038738		None		Recovered / Resolved	Not related	No	Mild	16_002	19JAN17	19JAN2017	30JAN17	30JAN2017	16	Early Termination	53	Male	03NOV16	154	MF4637	<250 mg/day	No	No	<250 mg/day	No	Yes	Yes	Yes	Yes	Yes
