# Supplementary material for: Evaluation of a High Concentrate Omega-3 for Correcting the Omega-3 Fatty Acid Nutritional Deficiency in Non-alcoholic Fatty Liver Disease and effects on Hepatic Steatosis (CONDIN)
Source: Preprints.org preprint supplement (doi:10.20944/preprints201807.0240.v1), 2018-07-13
Supplement: Supplementary file 2 [file CM.xlsx]

## Sheet: CM
CMSPID	CMTRT	CMDOSE	CMFRQOTH	CMINDIC	CMAENUM	CMDOSU	CMDOSFRQ	CMONGO	CMROUTE	CMINTRT	CMAEYN	SUBJID	CMSTDT	CDCMST	CMENDT	CDCMEN	SITE	STATUS	AGE	SEX	FIRSTDT	RANDNO	TREAT	OMEGA	DIABETE	STATIN	OMEGA_C	SFFL	SAFETY	ITT	MITT	PP
1	Klor-Con M20	75		Hypokalmeia		mg	qd/od	Yes	PO	Yes	No	02_001	27MAY14	27MAY2014			02	Entered	57	Female	27OCT15	108	MF4637	<250 mg/day	Yes	Yes	<250 mg/day	No	Yes	Yes	Yes	Yes
2	Hydrochlorothiazide	12.5		Hypertension		mg	qd/od	Yes	PO	Yes	No	02_001	16JUN14	16JUN2014			02	Entered	57	Female	27OCT15	108	MF4637	<250 mg/day	Yes	Yes	<250 mg/day	No	Yes	Yes	Yes	Yes
3	Losartan	100		Hypertension		mg	qd/od	Yes	PO	Yes	No	02_001	16JUN14	16JUN2014			02	Entered	57	Female	27OCT15	108	MF4637	<250 mg/day	Yes	Yes	<250 mg/day	No	Yes	Yes	Yes	Yes
4	Pro Air HFA	2		Asthma		puff	prn	Yes	inh	Yes	No	02_001	19JUL12	19JUL2012			02	Entered	57	Female	27OCT15	108	MF4637	<250 mg/day	Yes	Yes	<250 mg/day	No	Yes	Yes	Yes	Yes
5	Multivitamin	UNK		Dietary supplement		tab	qd/od	Yes	PO	Yes	No	02_001	19JUL12	19JUL2012			02	Entered	57	Female	27OCT15	108	MF4637	<250 mg/day	Yes	Yes	<250 mg/day	No	Yes	Yes	Yes	Yes
6	Ferrous sulfate	325		Dietary supplement		mg	qd/od	Yes	PO	Yes	No	02_001	19JUL12	19JUL2012			02	Entered	57	Female	27OCT15	108	MF4637	<250 mg/day	Yes	Yes	<250 mg/day	No	Yes	Yes	Yes	Yes
7	Singulair	10		Asthma		mg	qd/od	Yes	PO	Yes	No	02_001	28JUL14	28JUL2014			02	Entered	57	Female	27OCT15	108	MF4637	<250 mg/day	Yes	Yes	<250 mg/day	No	Yes	Yes	Yes	Yes
8	Crestor	20		Hypertension		mg	qd/od	Yes	PO	Yes	No	02_001	01JAN14	01JAN2014			02	Entered	57	Female	27OCT15	108	MF4637	<250 mg/day	Yes	Yes	<250 mg/day	No	Yes	Yes	Yes	Yes
9	Glucophage XR	500		Diabetes Mellitus Type II		mg	bid	Yes	PO	Yes	No	02_001	12DEC13	12DEC2013			02	Entered	57	Female	27OCT15	108	MF4637	<250 mg/day	Yes	Yes	<250 mg/day	No	Yes	Yes	Yes	Yes
10	Nexium	40		Gastro esophageal reflux disease		mg	qd/od	Yes	PO	Yes	No	02_001	09SEP14	09SEP2014			02	Entered	57	Female	27OCT15	108	MF4637	<250 mg/day	Yes	Yes	<250 mg/day	No	Yes	Yes	Yes	Yes
11	Celexa	40		Anxiety disorder		mg	qd/od	Yes	PO	Yes	No	02_001	09SEP14	09SEP2014			02	Entered	57	Female	27OCT15	108	MF4637	<250 mg/day	Yes	Yes	<250 mg/day	No	Yes	Yes	Yes	Yes
12	Ativan	0.5		Insomnia		mg	prn	Yes	PO	Yes	No	02_001	16JUL15	16JUL2015			02	Entered	57	Female	27OCT15	108	MF4637	<250 mg/day	Yes	Yes	<250 mg/day	No	Yes	Yes	Yes	Yes
13	Vitamin D2	50000 INTL UNITS	Every 7 days	Vitamin D deficiency		tab	other (specify)		PO	No	No	02_001	31MAR15	31MAR2015	31JUL15	31JUL2015	02	Entered	57	Female	27OCT15	108	MF4637	<250 mg/day	Yes	Yes	<250 mg/day	No	Yes	Yes	Yes	Yes
14	Zanaflex	4		Back pain		mg	bid	Yes	PO	Yes	No	02_001	12APR15	12APR2015			02	Entered	57	Female	27OCT15	108	MF4637	<250 mg/day	Yes	Yes	<250 mg/day	No	Yes	Yes	Yes	Yes
15	Fenofibrate	160		Hyperlipidemia		mg	qd/od	Yes	PO	Yes	No	02_001	31MAR15	31MAR2015			02	Entered	57	Female	27OCT15	108	MF4637	<250 mg/day	Yes	Yes	<250 mg/day	No	Yes	Yes	Yes	Yes
16	Fluzone 2015-2016	0.5	Once	Vaccine		mL	other (specify)		IM	Yes	No	02_001	11SEP15	11SEP2015	11SEP15	11SEP2015	02	Entered	57	Female	27OCT15	108	MF4637	<250 mg/day	Yes	Yes	<250 mg/day	No	Yes	Yes	Yes	Yes
1	Norvasc	10		Hypertension		mg	qd/od	Yes	PO	Yes	No	02_002	18JUN13	18JUN2013			02	Entered	41	Male	06NOV15	109	MF4637	<250 mg/day	No	Yes	>=250 mg/day	No	Yes	Yes	Yes	Yes
2	Hydrochlorothiazide-Lisinoprol	12.5-20		Hypertension		mg	qd/od	Yes	PO	Yes	No	02_002	18JUN13	18JUN2013			02	Entered	41	Male	06NOV15	109	MF4637	<250 mg/day	No	Yes	>=250 mg/day	No	Yes	Yes	Yes	Yes
3	Lipitor	40		Hyperlipidemia		mg	qd/od	Yes	PO	Yes	No	02_002	05MAR15	05MAR2015			02	Entered	41	Male	06NOV15	109	MF4637	<250 mg/day	No	Yes	>=250 mg/day	No	Yes	Yes	Yes	Yes
4	Fenofibrate	145		Hyperlipidemia		mg	qd/od	Yes	PO	Yes	No	02_002	02SEP15	02SEP2015			02	Entered	41	Male	06NOV15	109	MF4637	<250 mg/day	No	Yes	>=250 mg/day	No	Yes	Yes	Yes	Yes
5	Flonase	50 mcg		Allergies		puff	bid	Yes	inh	Yes	No	02_002	05MAR15	05MAR2015			02	Entered	41	Male	06NOV15	109	MF4637	<250 mg/day	No	Yes	>=250 mg/day	No	Yes	Yes	Yes	Yes
1	Colcrys	0.6		Gout		mg	tid	Yes	PO	Yes	No	02_003	15NOV12	15NOV2012			02	Entered	58	Male	03NOV15	110	Placebo	>=250 mg/day	Yes	Yes	<250 mg/day	No	Yes	Yes	Yes	Yes
2	Fluzone 2015-2016	0.5	once	Vaccine		mL	other (specify)		IM	No	No	02_003	22OCT15	22OCT2015	22OCT15	22OCT2015	02	Entered	58	Male	03NOV15	110	Placebo	>=250 mg/day	Yes	Yes	<250 mg/day	No	Yes	Yes	Yes	Yes
3	Hydrochlorothiazide-losartan	12.5-100		Hypertension		mg	qd/od	Yes	PO	Yes	No	02_003	21JAN14	21JAN2014			02	Entered	58	Male	03NOV15	110	Placebo	>=250 mg/day	Yes	Yes	<250 mg/day	No	Yes	Yes	Yes	Yes
4	Lipitor	40		Hyperlipidemia		mg	qd/od	Yes	PO	Yes	No	02_003	09DEC13	09DEC2013			02	Entered	58	Male	03NOV15	110	Placebo	>=250 mg/day	Yes	Yes	<250 mg/day	No	Yes	Yes	Yes	Yes
5	Glucophage XR	1000		Type II Diabetes Mellitus		mg	bid	Yes	PO	Yes	No	02_003	07MAR14	07MAR2014			02	Entered	58	Male	03NOV15	110	Placebo	>=250 mg/day	Yes	Yes	<250 mg/day	No	Yes	Yes	Yes	Yes
6	Aspirin	81		Hypertension		mg	qd/od	Yes	PO	Yes	No	02_003	10JUL12	10JUL2012			02	Entered	58	Male	03NOV15	110	Placebo	>=250 mg/day	Yes	Yes	<250 mg/day	No	Yes	Yes	Yes	Yes
1	Zocor	40		Hyperlipidemia		mg	qd/od	Yes	PO	Yes	No	02_004	01JAN13	01JAN2013			02	Early Termination	60	Female	12NOV15	111	Placebo	<250 mg/day	Yes	Yes	<250 mg/day	No	Yes	Yes	Yes	Yes
2	Toprol XL	25		Hypertension		mg	qd/od	Yes	PO	Yes	No	02_004	12JUN15	12JUN2015			02	Early Termination	60	Female	12NOV15	111	Placebo	<250 mg/day	Yes	Yes	<250 mg/day	No	Yes	Yes	Yes	Yes
3	Wellbutrin	150		Anxiety		mg	qd/od	Yes	PO	Yes	No	02_004	12JUN15	12JUN2015			02	Early Termination	60	Female	12NOV15	111	Placebo	<250 mg/day	Yes	Yes	<250 mg/day	No	Yes	Yes	Yes	Yes
4	Hydrochlorothiazide-Valsartan	25/320		Hypertension		mg	qd/od	Yes	PO	Yes	No	02_004	21APR14	21APR2014			02	Early Termination	60	Female	12NOV15	111	Placebo	<250 mg/day	Yes	Yes	<250 mg/day	No	Yes	Yes	Yes	Yes
5	Metformin	1000		Diabetes Mellitus Type II		mg	bid	Yes	PO	Yes	No	02_004	01JAN09	01JAN2009			02	Early Termination	60	Female	12NOV15	111	Placebo	<250 mg/day	Yes	Yes	<250 mg/day	No	Yes	Yes	Yes	Yes
1	Allegra	180		Allergic Rhinitis		mg	qd/od	Yes	PO	Yes	No	02_005	20AUG12	20AUG2012			02	Entered	65	Male	04DEC15	112	Placebo	>=250 mg/day	No	No	>=250 mg/day	No	Yes	Yes	Yes	Yes
2	Omeprazole	20		GERD		mg	qd/od	Yes	PO	Yes	No	02_005	16OCT12	16OCT2012			02	Entered	65	Male	04DEC15	112	Placebo	>=250 mg/day	No	No	>=250 mg/day	No	Yes	Yes	Yes	Yes
3	Librax	5-2.5		Diverticulitis		mg	qd/od	Yes	PO	Yes	No	02_005	16OCT12	16OCT2012			02	Entered	65	Male	04DEC15	112	Placebo	>=250 mg/day	No	No	>=250 mg/day	No	Yes	Yes	Yes	Yes
4	Cialis	20		Impotence of organic origin		mg	prn	Yes	PO	Yes	No	02_005	16OCT12	16OCT2012			02	Entered	65	Male	04DEC15	112	Placebo	>=250 mg/day	No	No	>=250 mg/day	No	Yes	Yes	Yes	Yes
5	Rhinicort Auqua	0.032		allergic rhinitis		mg	bid	Yes	inh	Yes	No	02_005	16OCT12	16OCT2012			02	Entered	65	Male	04DEC15	112	Placebo	>=250 mg/day	No	No	>=250 mg/day	No	Yes	Yes	Yes	Yes
6	Fioricet	325-50-40		Migraines		mg	qid	Yes	PO	Yes	No	02_005	16OCT12	16OCT2012			02	Entered	65	Male	04DEC15	112	Placebo	>=250 mg/day	No	No	>=250 mg/day	No	Yes	Yes	Yes	Yes
7	Acetaminophen-Hydrocodone	325-5		Joint Pain		mg	prn	Yes	PO	Yes	No	02_005	30AUG13	30AUG2013			02	Entered	65	Male	04DEC15	112	Placebo	>=250 mg/day	No	No	>=250 mg/day	No	Yes	Yes	Yes	Yes
8	Bactroban	2%		Skin rash		g	tid	Yes	SC	Yes	No	02_005	02OCT15	02OCT2015			02	Entered	65	Male	04DEC15	112	Placebo	>=250 mg/day	No	No	>=250 mg/day	No	Yes	Yes	Yes	Yes
1	flexeril	10		pain		mg	prn		PO	Yes	No	03_001	30JUN14	30JUN2014		2014	03	Early Termination	53	Male	19NOV15	117	MF4637	<250 mg/day	No	No	>=250 mg/day	No	Yes	Yes	No	No
2	Niacin	1000		low HDL		mg	qd/od	Yes	PO	Yes	No	03_001	24JUL13	24JUL2013			03	Early Termination	53	Male	19NOV15	117	MF4637	<250 mg/day	No	No	>=250 mg/day	No	Yes	Yes	No	No
3	amlodipne	10		HBP		mg	qd/od	Yes	PO	Yes	No	03_001	12OCT15	12OCT2015			03	Early Termination	53	Male	19NOV15	117	MF4637	<250 mg/day	No	No	>=250 mg/day	No	Yes	Yes	No	No
4	valtrex	1		fever blisters		g	bid	Yes	PO	Yes	No	03_001	05APR13	05APR2013			03	Early Termination	53	Male	19NOV15	117	MF4637	<250 mg/day	No	No	>=250 mg/day	No	Yes	Yes	No	No
5	Ginkgo biloba	otc		mineral supplements		tab	qd/od	Yes	PO	Yes	No	03_001		2014			03	Early Termination	53	Male	19NOV15	117	MF4637	<250 mg/day	No	No	>=250 mg/day	No	Yes	Yes	No	No
6	muti vitamins	otc		mineral supplements		tab	qd/od	Yes	PO	Yes	No	03_001		2014			03	Early Termination	53	Male	19NOV15	117	MF4637	<250 mg/day	No	No	>=250 mg/day	No	Yes	Yes	No	No
7	penlac	8%	TD	toenail fungas		mL	other (specify)		top	No	No	03_001	12OCT15	12OCT2015		2015	03	Early Termination	53	Male	19NOV15	117	MF4637	<250 mg/day	No	No	>=250 mg/day	No	Yes	Yes	No	No
8	Omega 3	1500		fatty liver note pt did do a 30 day wash out		mg	qd/od		PO	No	No	03_001		2015	16OCT15	16OCT2015	03	Early Termination	53	Male	19NOV15	117	MF4637	<250 mg/day	No	No	>=250 mg/day	No	Yes	Yes	No	No
1	FLEXERIL	10		MUSCLE SPASMS		mg	prn	Yes	PO	Yes	No	03_002		2012			03	Early Termination	52	Female	30OCT15	116	Placebo	<250 mg/day	No	No	<250 mg/day	No	Yes	Yes	Yes	Yes
2	TRAMADOL	50		PAIN		mg	prn	Yes	PO	Yes	No	03_002		SEP2010			03	Early Termination	52	Female	30OCT15	116	Placebo	<250 mg/day	No	No	<250 mg/day	No	Yes	Yes	Yes	Yes
3	ZOLIPIDEM	10		INSOMIA		mg	prn	Yes	PO	Yes	No	03_002		SEP2010			03	Early Termination	52	Female	30OCT15	116	Placebo	<250 mg/day	No	No	<250 mg/day	No	Yes	Yes	Yes	Yes
4	ESTRADIOL	1		HOT FLASHES		mg	qd/od	Yes	PO	Yes	No	03_002	07APR15	07APR2015			03	Early Termination	52	Female	30OCT15	116	Placebo	<250 mg/day	No	No	<250 mg/day	No	Yes	Yes	Yes	Yes
5	LAMISIL	100		TOENAIL FUNGUS		mg	prn		PO	Yes	No	03_002	01JUN15	01JUN2015	20DEC15	20DEC2015	03	Early Termination	52	Female	30OCT15	116	Placebo	<250 mg/day	No	No	<250 mg/day	No	Yes	Yes	Yes	Yes
6	oral anesthetic	otc		sore troat		mg	prn		inh	Yes	No	03_002	30OCT15	30OCT2015	25DEC15	25DEC2015	03	Early Termination	52	Female	30OCT15	116	Placebo	<250 mg/day	No	No	<250 mg/day	No	Yes	Yes	Yes	Yes
7	Dulera	200		asthma		mg	prn	Yes	inh	Yes	No	03_002	01FEB16	01FEB2016			03	Early Termination	52	Female	30OCT15	116	Placebo	<250 mg/day	No	No	<250 mg/day	No	Yes	Yes	Yes	Yes
1	METFORMIN ER	750		DIABETES		mg	bid	Yes	PO	Yes	No	03_004	04FEB16	04FEB2016			03	Entered	56	Female	24NOV15	118	Placebo	<250 mg/day	No	No	>=250 mg/day	No	Yes	Yes	Yes	Yes
2	DIFLUCAN	100	1X	YEAST INFECTION		mg	other (specify)		PO	Yes	No	03_004	04FEB16	04FEB2016	04FEB16	04FEB2016	03	Entered	56	Female	24NOV15	118	Placebo	<250 mg/day	No	No	>=250 mg/day	No	Yes	Yes	Yes	Yes
3	INVOKANA	300		DIABETES		mg	qd/od	Yes	PO	Yes	No	03_004	11JAN16	11JAN2016			03	Entered	56	Female	24NOV15	118	Placebo	<250 mg/day	No	No	>=250 mg/day	No	Yes	Yes	Yes	Yes
4	Simvastatin	20		HIGH CHOL		mg	qd/od	Yes	PO	Yes	No	03_004		2008			03	Entered	56	Female	24NOV15	118	Placebo	<250 mg/day	No	No	>=250 mg/day	No	Yes	Yes	Yes	Yes
5	LISINOPRIL	40		HIGH BLOOD PRESSURE		mg	qd/od	Yes	PO	Yes	No	03_004		2008			03	Entered	56	Female	24NOV15	118	Placebo	<250 mg/day	No	No	>=250 mg/day	No	Yes	Yes	Yes	Yes
6	NORVASC	5		HIGH BP		mg	qd/od	Yes	PO	Yes	No	03_004	29APR15	29APR2015			03	Entered	56	Female	24NOV15	118	Placebo	<250 mg/day	No	No	>=250 mg/day	No	Yes	Yes	Yes	Yes
7	HCTZ	25		HIGH BP		mg	qd/od	Yes	PO	Yes	No	03_004	29APR15	29APR2015			03	Entered	56	Female	24NOV15	118	Placebo	<250 mg/day	No	No	>=250 mg/day	No	Yes	Yes	Yes	Yes
8	WELLBURTIN XL	150		DEPRESSION		mg	qd/od		PO	No	No	03_004	29APR15	29APR2015	15DEC15	15DEC2015	03	Entered	56	Female	24NOV15	118	Placebo	<250 mg/day	No	No	>=250 mg/day	No	Yes	Yes	Yes	Yes
9	CELEXA	20		DEPRESSION		mg	qd/od		PO	No	No	03_004	29APR15	29APR2015	15DEC15	15DEC2015	03	Entered	56	Female	24NOV15	118	Placebo	<250 mg/day	No	No	>=250 mg/day	No	Yes	Yes	Yes	Yes
10	AMLODIPINE	5		HIGN BP		mg	qd/od	Yes	PO	No	No	03_004	11APR16	11APR2016			03	Entered	56	Female	24NOV15	118	Placebo	<250 mg/day	No	No	>=250 mg/day	No	Yes	Yes	Yes	Yes
1	losartan	100		hypertension		mg	qd/od	Yes	PO	Yes	No	03_005	26FEB16	26FEB2016			03	Early Termination	49	Female	25NOV15	119	MF4637	>=250 mg/day	No	No	<250 mg/day	No	Yes	Yes	Yes	Yes
2	synthroid	10.5		hypothyroidism		g	qd/od	Yes	PO	Yes	No	03_005	08AUG13	08AUG2013			03	Early Termination	49	Female	25NOV15	119	MF4637	>=250 mg/day	No	No	<250 mg/day	No	Yes	Yes	Yes	Yes
3	excedrin	200		migraines		mg	qd/od	Yes	PO	Yes	No	03_005	08APR15	08APR2015			03	Early Termination	49	Female	25NOV15	119	MF4637	>=250 mg/day	No	No	<250 mg/day	No	Yes	Yes	Yes	Yes
4	vitiamin D	2000		CKD 3		IU	qd/od	Yes	PO	Yes	No	03_005	04AUG15	04AUG2015			03	Early Termination	49	Female	25NOV15	119	MF4637	>=250 mg/day	No	No	<250 mg/day	No	Yes	Yes	Yes	Yes
5	BISOPROLOL	5		HYPERTENSION		mg	qd/od	Yes	PO	Yes	No	03_005	04AUG15	04AUG2015			03	Early Termination	49	Female	25NOV15	119	MF4637	>=250 mg/day	No	No	<250 mg/day	No	Yes	Yes	Yes	Yes
6	OMEPRAZOLE	40		GERD		mg	qd/od	Yes	PO	Yes	No	03_005	04AUG15	04AUG2015			03	Early Termination	49	Female	25NOV15	119	MF4637	>=250 mg/day	No	No	<250 mg/day	No	Yes	Yes	Yes	Yes
7	CITALOPRAM	40		DEPRESSION		mg	qd/od	Yes	PO	Yes	No	03_005	04AUG15	04AUG2015			03	Early Termination	49	Female	25NOV15	119	MF4637	>=250 mg/day	No	No	<250 mg/day	No	Yes	Yes	Yes	Yes
8	WELLURTIN XL	300		DEPRESSION		mg	qd/od	Yes	PO	Yes	No	03_005	04AUG15	04AUG2015			03	Early Termination	49	Female	25NOV15	119	MF4637	>=250 mg/day	No	No	<250 mg/day	No	Yes	Yes	Yes	Yes
9	FLONASE	110		ALLERGIES		puff	qd/od	Yes	inh	Yes	No	03_005	13JAN16	13JAN2016			03	Early Termination	49	Female	25NOV15	119	MF4637	>=250 mg/day	No	No	<250 mg/day	No	Yes	Yes	Yes	Yes
10	CEFTIN	250		SINUS		mg	bid		PO	Yes	No	03_005	13JAN16	13JAN2016	22JAN16	22JAN2016	03	Early Termination	49	Female	25NOV15	119	MF4637	>=250 mg/day	No	No	<250 mg/day	No	Yes	Yes	Yes	Yes
11	CELESTONE	7	1X	SINUS		mg	other (specify)		IN	Yes	No	03_005	13JAN16	13JAN2016	13JAN16	13JAN2016	03	Early Termination	49	Female	25NOV15	119	MF4637	>=250 mg/day	No	No	<250 mg/day	No	Yes	Yes	Yes	Yes
12	MUCINEX	600		SINUS		mg	prn	Yes	PO	Yes	No	03_005	13JAN16	13JAN2016			03	Early Termination	49	Female	25NOV15	119	MF4637	>=250 mg/day	No	No	<250 mg/day	No	Yes	Yes	Yes	Yes
1	omeprozole	40		gerd		mg	qd/od	Yes	PO	Yes	No	03_007		2005			03	Entered	40	Male	19NOV15	120	Placebo	<250 mg/day	No	No	<250 mg/day	No	Yes	Yes	Yes	No
2	oxycodone	5/325		pain		mg	prn	Yes	PO	Yes	No	03_007	01JAN16	01JAN2016			03	Entered	40	Male	19NOV15	120	Placebo	<250 mg/day	No	No	<250 mg/day	No	Yes	Yes	Yes	No
3	lexapro	10		depression		mg	qd/od		PO	Yes	No	03_007	05NOV15	05NOV2015	02FEB16	02FEB2016	03	Entered	40	Male	19NOV15	120	Placebo	<250 mg/day	No	No	<250 mg/day	No	Yes	Yes	Yes	No
4	smz/tmp	800/160		acute sinusitis		mg	bid		PO	Yes	No	03_007	12FEB16	12FEB2016	12FEB16	12FEB2016	03	Entered	40	Male	19NOV15	120	Placebo	<250 mg/day	No	No	<250 mg/day	No	Yes	Yes	Yes	No
5	z-pak	250		acute sinusitis		mg	qd/od		PO	Yes	No	03_007	12FEB16	12FEB2016	16FEB16	16FEB2016	03	Entered	40	Male	19NOV15	120	Placebo	<250 mg/day	No	No	<250 mg/day	No	Yes	Yes	Yes	No
6	medrio dose pak	4		acute sinusitis		mg	prn		PO	Yes	No	03_007	12FEB16	12FEB2016	16FEB16	16FEB2016	03	Entered	40	Male	19NOV15	120	Placebo	<250 mg/day	No	No	<250 mg/day	No	Yes	Yes	Yes	No
7	williams sol	15		acute sinusitis		mL	bid		IN	Yes	No	03_007	19FEB16	19FEB2016	03MAR16	03MAR2016	03	Entered	40	Male	19NOV15	120	Placebo	<250 mg/day	No	No	<250 mg/day	No	Yes	Yes	Yes	No
9	OMEPRAZOLE	40		GERD		mg	qd/od	Yes	PO	Yes	No	03_007		2008			03	Entered	40	Male	19NOV15	120	Placebo	<250 mg/day	No	No	<250 mg/day	No	Yes	Yes	Yes	No
10	LIPITOR	40		CHOL		mg	qd/od	Yes	PO	Yes	No	03_007	31MAR16	31MAR2016			03	Entered	40	Male	19NOV15	120	Placebo	<250 mg/day	No	No	<250 mg/day	No	Yes	Yes	Yes	No
11	METAMUCIL	OTC		CONSTIPATION		tbsp	qd/od	Yes	PO	Yes	No	03_007	31MAR16	31MAR2016			03	Entered	40	Male	19NOV15	120	Placebo	<250 mg/day	No	No	<250 mg/day	No	Yes	Yes	Yes	No
12	MIRALAX	OTC		CONSTIPATION		tbsp	qd/od	Yes	PO	Yes	No	03_007	31MAR16	31MAR2016			03	Entered	40	Male	19NOV15	120	Placebo	<250 mg/day	No	No	<250 mg/day	No	Yes	Yes	Yes	No
13	tylenol	500	one time	sinus		mg	other (specify)		PO	Yes	No	03_007	12FEB16	12FEB2016	12FEB16	12FEB2016	03	Entered	40	Male	19NOV15	120	Placebo	<250 mg/day	No	No	<250 mg/day	No	Yes	Yes	Yes	No
1	losartan hct	100/25		high blood pressure		mg	qd/od	Yes	PO	Yes	No	03_009	21OCT15	21OCT2015			03	Entered	40	Male	13JAN16	122	MF4637	<250 mg/day	No	No	>=250 mg/day	No	Yes	Yes	Yes	Yes
2	medrol dose pak	4		neck and arm weekness		mg	qd/od	Yes	PO	Yes	No	03_009	13APR16	13APR2016			03	Entered	40	Male	13JAN16	122	MF4637	<250 mg/day	No	No	>=250 mg/day	No	Yes	Yes	Yes	Yes
2	pantoprazole	40		gerd		mg	qd/od	Yes	PO	Yes	No	03_010		2010			03	Entered	41	Male	12JAN16	123	Placebo	>=250 mg/day	No	No	>=250 mg/day	No	Yes	Yes	Yes	Yes
3	celestone	7	once	allergic rhinitis		mg	other (specify)		IM	Yes	No	03_010	23FEB16	23FEB2016	23FEB16	23FEB2016	03	Entered	41	Male	12JAN16	123	Placebo	>=250 mg/day	No	No	>=250 mg/day	No	Yes	Yes	Yes	Yes
4	flonase	110		allergic rhinitis		puff	qd/od	Yes	inh	Yes	No	03_010	23FEB16	23FEB2016			03	Entered	41	Male	12JAN16	123	Placebo	>=250 mg/day	No	No	>=250 mg/day	No	Yes	Yes	Yes	Yes
5	cialis	20		ed		mg	prn	Yes	PO	Yes	No	03_010	15JAN15	15JAN2015			03	Entered	41	Male	12JAN16	123	Placebo	>=250 mg/day	No	No	>=250 mg/day	No	Yes	Yes	Yes	Yes
6	mobic	7.5		LBP		mg	qd/od	Yes	PO	Yes	No	03_010	15JAN15	15JAN2015			03	Entered	41	Male	12JAN16	123	Placebo	>=250 mg/day	No	No	>=250 mg/day	No	Yes	Yes	Yes	Yes
7	TRAZODONE	150		INSOMNIA		mg	prn		PO	No	No	03_010	09APR14	09APR2014	09APR14	09APR2014	03	Entered	41	Male	12JAN16	123	Placebo	>=250 mg/day	No	No	>=250 mg/day	No	Yes	Yes	Yes	Yes
8	FLEXERIL	10		LBP		mg	prn	Yes	PO	Yes	No	03_010	06MAR16	06MAR2016			03	Entered	41	Male	12JAN16	123	Placebo	>=250 mg/day	No	No	>=250 mg/day	No	Yes	Yes	Yes	Yes
9	flonase	110		allergies		mg	qd/od	Yes	inh	Yes	No	03_010	21FEB16	21FEB2016			03	Entered	41	Male	12JAN16	123	Placebo	>=250 mg/day	No	No	>=250 mg/day	No	Yes	Yes	Yes	Yes
10	c-pap machanie	na	qhs	sleep apnea		IU	other (specify)	Yes	inh	Yes	No	03_010		09UNK2010			03	Entered	41	Male	12JAN16	123	Placebo	>=250 mg/day	No	No	>=250 mg/day	No	Yes	Yes	Yes	Yes
11	allegra	180		allergies		mg	qd/od	Yes	PO	Yes	No	03_010	23FEB16	23FEB2016			03	Entered	41	Male	12JAN16	123	Placebo	>=250 mg/day	No	No	>=250 mg/day	No	Yes	Yes	Yes	Yes
12	diatary supplement	30		weight loss		mg	qd/od	Yes	PO	Yes	No	03_010	01JUL16	01JUL2016			03	Entered	41	Male	12JAN16	123	Placebo	>=250 mg/day	No	No	>=250 mg/day	No	Yes	Yes	Yes	Yes
1	losartan hct	100/25		high blood pressure		mg	qd/od	Yes	PO	Yes	No	03_011	22APR15	22APR2015			03	Entered	55	Male	11FEB16	188	MF4637	<250 mg/day	No	Yes	<250 mg/day	No	Yes	Yes	Yes	Yes
2	nexium	40		gerd		mg	qd/od	Yes	PO	Yes	No	03_011		2010			03	Entered	55	Male	11FEB16	188	MF4637	<250 mg/day	No	Yes	<250 mg/day	No	Yes	Yes	Yes	Yes
3	z-pak	250		uri		mg	qd/od		PO	Yes	No	03_011	29FEB16	29FEB2016	04MAR16	04MAR2016	03	Entered	55	Male	11FEB16	188	MF4637	<250 mg/day	No	Yes	<250 mg/day	No	Yes	Yes	Yes	Yes
4	Promethean w codiene	1	qhs	uri		tsp	other (specify)		PO	Yes	No	03_011	29FEB16	29FEB2016	04MAR16	04MAR2016	03	Entered	55	Male	11FEB16	188	MF4637	<250 mg/day	No	Yes	<250 mg/day	No	Yes	Yes	Yes	Yes
5	IMODIUM AD	7.5		DIAHEERRA		cap	qd/od		PO	Yes	No	03_011	04MAY16	04MAY2016	07MAY16	07MAY2016	03	Entered	55	Male	11FEB16	188	MF4637	<250 mg/day	No	Yes	<250 mg/day	No	Yes	Yes	Yes	Yes
6	CULTURELLE PROBIOTIC	EXTRA STENGTH		PROBIOTC		mg	qd/od		PO	No	No	03_011	01MAY15	01MAY2015	08AUG15	08AUG2015	03	Entered	55	Male	11FEB16	188	MF4637	<250 mg/day	No	Yes	<250 mg/day	No	Yes	Yes	Yes	Yes
1	DIOVAN HCT	320/25		HTN		mg	qd/od	Yes	PO	Yes	No	03_012		DEC2012			03	Entered	63	Male	12FEB16	190	MF4637	<250 mg/day	No	Yes	<250 mg/day	No	Yes	Yes	Yes	Yes
2	AMLOPIDINE	5		HTN		mg	qd/od	Yes	PO	Yes	No	03_012		02UNK2013			03	Entered	63	Male	12FEB16	190	MF4637	<250 mg/day	No	Yes	<250 mg/day	No	Yes	Yes	Yes	Yes
3	Simvastatin	40		HIGH CHOL		mg	qd/od	Yes	PO	Yes	No	03_012		12UNK2012			03	Entered	63	Male	12FEB16	190	MF4637	<250 mg/day	No	Yes	<250 mg/day	No	Yes	Yes	Yes	Yes
4	OMEPRAZOLE	40		GERD		mg	qd/od	Yes	PO	Yes	No	03_012		12UNK2012			03	Entered	63	Male	12FEB16	190	MF4637	<250 mg/day	No	Yes	<250 mg/day	No	Yes	Yes	Yes	Yes
5	FLONASE	110	2 SPRAYS	ALLERGIES		puff	other (specify)	Yes	inh	Yes	No	03_012	13JAN16	13JAN2016			03	Entered	63	Male	12FEB16	190	MF4637	<250 mg/day	No	Yes	<250 mg/day	No	Yes	Yes	Yes	Yes
6	CLARTIN	10		ALLERGIES		mg	prn	Yes	PO	Yes	No	03_012		1996			03	Entered	63	Male	12FEB16	190	MF4637	<250 mg/day	No	Yes	<250 mg/day	No	Yes	Yes	Yes	Yes
7	SONATA	10		INSOMINIA		mg	prn	Yes	PO	Yes	No	03_012		2013			03	Entered	63	Male	12FEB16	190	MF4637	<250 mg/day	No	Yes	<250 mg/day	No	Yes	Yes	Yes	Yes
8	cipro	250		fever		mg	bid		PO	Yes	No	03_012	28MAR16	28MAR2016	01APR16	01APR2016	03	Entered	63	Male	12FEB16	190	MF4637	<250 mg/day	No	Yes	<250 mg/day	No	Yes	Yes	Yes	Yes
9	augmentin	875		prostate		mg	bid		PO	Yes	No	03_012	25MAY16	25MAY2016	04JUN16	04JUN2016	03	Entered	63	Male	12FEB16	190	MF4637	<250 mg/day	No	Yes	<250 mg/day	No	Yes	Yes	Yes	Yes
10	tylenol	500		lower back pain		mg	bid		PO	Yes	No	03_012	11JUN16	11JUN2016	20JUN16	20JUN2016	03	Entered	63	Male	12FEB16	190	MF4637	<250 mg/day	No	Yes	<250 mg/day	No	Yes	Yes	Yes	Yes
11	CPAP	9	QHS	SLEEP APNEA		IU	other (specify)	Yes	inh	Yes	No	03_012	23AUG13	23AUG2013			03	Entered	63	Male	12FEB16	190	MF4637	<250 mg/day	No	Yes	<250 mg/day	No	Yes	Yes	Yes	Yes
1	lipitor	20		high chol		mg	qd/od	Yes	PO	Yes	No	03_013	16DEC15	16DEC2015			03	Entered	61	Female	11FEB16	189	Placebo	<250 mg/day	No	Yes	<250 mg/day	No	Yes	Yes	Yes	Yes
3	vitamin d	2000		ckd3		IU	qd/od	Yes	PO	Yes	No	03_013	06FEB14	06FEB2014			03	Entered	61	Female	11FEB16	189	Placebo	<250 mg/day	No	Yes	<250 mg/day	No	Yes	Yes	Yes	Yes
4	prometh/codiene	1-2		bronchitis		tsp	prn		PO	Yes	No	03_013	24FEB16	24FEB2016	05MAR16	05MAR2016	03	Entered	61	Female	11FEB16	189	Placebo	<250 mg/day	No	Yes	<250 mg/day	No	Yes	Yes	Yes	Yes
5	omnicef	300		bronchitis		mg	bid		PO	Yes	No	03_013	24FEB16	24FEB2016	05MAR16	05MAR2016	03	Entered	61	Female	11FEB16	189	Placebo	<250 mg/day	No	Yes	<250 mg/day	No	Yes	Yes	Yes	Yes
6	LOSARTAN	100		HIGH BLOOD PRESSURE		mg	qd/od	Yes	PO	Yes	No	03_013	27APR16	27APR2016			03	Entered	61	Female	11FEB16	189	Placebo	<250 mg/day	No	Yes	<250 mg/day	No	Yes	Yes	Yes	Yes
7	AMLODIPINE	5		HIGH BLOOD PRESSURE		mg	qd/od	Yes	PO	Yes	No	03_013	27APR16	27APR2016			03	Entered	61	Female	11FEB16	189	Placebo	<250 mg/day	No	Yes	<250 mg/day	No	Yes	Yes	Yes	Yes
8	ALEVE	220		ACHE LEGS		mg	qd/od		PO	Yes	No	03_013	19APR16	19APR2016	19APR16	19APR2016	03	Entered	61	Female	11FEB16	189	Placebo	<250 mg/day	No	Yes	<250 mg/day	No	Yes	Yes	Yes	Yes
9	TYLENOL	500	ONCE	HIT HER HEAD		mg	other (specify)		PO	Yes	No	03_013	15APR16	15APR2016	15APR16	15APR2016	03	Entered	61	Female	11FEB16	189	Placebo	<250 mg/day	No	Yes	<250 mg/day	No	Yes	Yes	Yes	Yes
10	FLEXERIL	150	ONCE	HIT HER HEAD		mg	other (specify)		PO	Yes	No	03_013	15APR16	15APR2016	15APR16	15APR2016	03	Entered	61	Female	11FEB16	189	Placebo	<250 mg/day	No	Yes	<250 mg/day	No	Yes	Yes	Yes	Yes
1	Metformin HCI	500		Diabetes II		mg	bid	Yes	PO	Yes	No	04_001	01DEC09	01DEC2009			04	Entered	49	Female	13OCT15	124	Placebo	>=250 mg/day	Yes	No	>=250 mg/day	No	Yes	Yes	Yes	Yes
2	Lisinapril	2.5		Hypertension		mg	qd/od	Yes	PO	Yes	No	04_001	01JAN15	01JAN2015			04	Entered	49	Female	13OCT15	124	Placebo	>=250 mg/day	Yes	No	>=250 mg/day	No	Yes	Yes	Yes	Yes
3	Omega 3	500		Fatty Liver		mg	bid		PO	No	No	04_001	02FEB15	02FEB2015	23SEP15	23SEP2015	04	Entered	49	Female	13OCT15	124	Placebo	>=250 mg/day	Yes	No	>=250 mg/day	No	Yes	Yes	Yes	Yes
4	Glipizide	10		Diabetes II		mg	qd/od	Yes	PO	Yes	No	04_001	01JAN15	01JAN2015			04	Entered	49	Female	13OCT15	124	Placebo	>=250 mg/day	Yes	No	>=250 mg/day	No	Yes	Yes	Yes	Yes
1	Gemfibrozil	600		Fatty Liver		mg	qd/od		PO	No	No	04_004	10OCT13	10OCT2013	05SEP15	05SEP2015	04	Entered	34	Male	15OCT15	125	MF4637	<250 mg/day	No	No	<250 mg/day	No	Yes	Yes	Yes	No
2	Omega 3	1000		Fatty Liver		mg	qd/od		PO	No	No	04_004	20JUN13	20JUN2013	01FEB15	01FEB2015	04	Entered	34	Male	15OCT15	125	MF4637	<250 mg/day	No	No	<250 mg/day	No	Yes	Yes	Yes	No
1	synthroid	150		Thyroid		mg	qd/od	Yes	PO	Yes	No	04_006	01JAN10	01JAN2010			04	Screen Failure	54	Female							>=250 mg/day	Yes	No	No	No	No
2	Avalide	150		Pressure		mg	qd/od	Yes	PO	Yes	No	04_006	17JUN12	17JUN2012			04	Screen Failure	54	Female							>=250 mg/day	Yes	No	No	No	No
3	Metformin	500		Diabetes		mg	qd/od	Yes	PO	Yes	No	04_006	04OCT15	04OCT2015			04	Screen Failure	54	Female							>=250 mg/day	Yes	No	No	No	No
4	Plaqueril	200		Rheumatoid Arthritis		mg	qd/od	Yes	PO	Yes	No	04_006	17JUN15	17JUN2015			04	Screen Failure	54	Female							>=250 mg/day	Yes	No	No	No	No
5	Isoniazed	300		TB Prevention		mg	qd/od	Yes	PO	Yes	No	04_006	02JUL15	02JUL2015			04	Screen Failure	54	Female							>=250 mg/day	Yes	No	No	No	No
6	Omega	1		Prevention		cap	qd/od		PO	No	No	04_006	10SEP14	10SEP2014	13JUN15	13JUN2015	04	Screen Failure	54	Female							>=250 mg/day	Yes	No	No	No	No
1	atenolol chlorthal	100-25		Blood Pressure		tab	qd/od	Yes	PO	Yes	No	04_007	03NOV08	03NOV2008			04	Screen Failure	59	Female							>=250 mg/day	Yes	No	No	No	No
2	Ranitidine	75		Acid Reflux		mg	bid	Yes	PO	Yes	No	04_007	01JUL13	01JUL2013			04	Screen Failure	59	Female							>=250 mg/day	Yes	No	No	No	No
3	Baclofen HCL ER	10		Muscle Relaxer		mg	tid	Yes	PO	Yes	No	04_007	09NOV15	09NOV2015			04	Screen Failure	59	Female							>=250 mg/day	Yes	No	No	No	No
4	Clobetasol	0.05		Skin Care		g	qd/od	Yes	top	Yes	No	04_007	01JUL15	01JUL2015			04	Screen Failure	59	Female							>=250 mg/day	Yes	No	No	No	No
5	Furosemide	40		Water Pill		mg	qd/od	Yes	PO	Yes	No	04_007	20MAR09	20MAR2009			04	Screen Failure	59	Female							>=250 mg/day	Yes	No	No	No	No
6	Trazodone	150		Sleep Aid		mg	qd/od	Yes	PO	Yes	No	04_007	01DEC14	01DEC2014			04	Screen Failure	59	Female							>=250 mg/day	Yes	No	No	No	No
7	lorazepam	0.5		anxiety		mg	bid	Yes	PO	Yes	No	04_007	06JUL15	06JUL2015			04	Screen Failure	59	Female							>=250 mg/day	Yes	No	No	No	No
8	Creon DR	12000		exocrine pancreatic insufficiency		IU	tid	Yes	PO	Yes	No	04_007	01JUL13	01JUL2013			04	Screen Failure	59	Female							>=250 mg/day	Yes	No	No	No	No
9	Hydrocodone/Aceptominophen	10/325	4-6 hrs	Pain		mg	other (specify)	Yes	PO	Yes	No	04_007	01SEP09	01SEP2009			04	Screen Failure	59	Female							>=250 mg/day	Yes	No	No	No	No
1	Advair	250/50		Asthma		puff	bid	Yes	inh	No	No	04_009	01JAN13	01JAN2013			04	Entered	53	Female	04JAN16	127	Placebo	<250 mg/day	No	No	<250 mg/day	No	Yes	Yes	Yes	Yes
2	Albuterol	90		Asthma		puff	prn	Yes	inh	No	No	04_009	01JAN80	01JAN1980			04	Entered	53	Female	04JAN16	127	Placebo	<250 mg/day	No	No	<250 mg/day	No	Yes	Yes	Yes	Yes
1	Colace	50		Constipation		mg	qod	Yes	PO	No	No	04_010	01JAN15	01JAN2015			04	Entered	25	Female	05JAN16	126	MF4637	>=250 mg/day	No	No	>=250 mg/day	No	Yes	Yes	Yes	Yes
2	Folic Acid	400		vitamin		mg	qd/od	Yes	PO	No	No	04_010	01JAN15	01JAN2015			04	Entered	25	Female	05JAN16	126	MF4637	>=250 mg/day	No	No	>=250 mg/day	No	Yes	Yes	Yes	Yes
1	Metformin	1000		Diabetes		mg	bid	Yes	PO	Yes	No	04_011	01JAN10	01JAN2010			04	Entered	41	Male	26JAN16	129	Placebo	>=250 mg/day	No	No	>=250 mg/day	No	Yes	Yes	Yes	Yes
2	Losartin	100		Hypertension		mg	qd/od	Yes	PO	No	No	04_011	01JAN10	01JAN2010			04	Entered	41	Male	26JAN16	129	Placebo	>=250 mg/day	No	No	>=250 mg/day	No	Yes	Yes	Yes	Yes
3	Januvia	50		diabetes		mg	qd/od	Yes	PO	No	No	04_011	01JAN10	01JAN2010			04	Entered	41	Male	26JAN16	129	Placebo	>=250 mg/day	No	No	>=250 mg/day	No	Yes	Yes	Yes	Yes
4	Proair	90		Asthma		puff	prn	Yes	inh	No	No	04_011	01JAN14	01JAN2014			04	Entered	41	Male	26JAN16	129	Placebo	>=250 mg/day	No	No	>=250 mg/day	No	Yes	Yes	Yes	Yes
5	Advair	250/50		Asthma		puff	bid	Yes	inh	No	No	04_011	01JAN14	01JAN2014			04	Entered	41	Male	26JAN16	129	Placebo	>=250 mg/day	No	No	>=250 mg/day	No	Yes	Yes	Yes	Yes
6	Glimepiride	4		diabetes		mg	bid	Yes	PO	No	No	04_011	01JAN10	01JAN2010			04	Entered	41	Male	26JAN16	129	Placebo	>=250 mg/day	No	No	>=250 mg/day	No	Yes	Yes	Yes	Yes
1	Advair	250/50		Asthma		puff	bid	Yes	inh	Yes	No	04_012	04JAN00	04JAN2000			04	Entered	19	Male	19JAN16	128	Placebo	<250 mg/day	No	No	<250 mg/day	No	Yes	Yes	Yes	Yes
2	Pro-Air	90		Asthma		puff	prn	Yes	inh	Yes	No	04_012	04JAN00	04JAN2000			04	Entered	19	Male	19JAN16	128	Placebo	<250 mg/day	No	No	<250 mg/day	No	Yes	Yes	Yes	Yes
1	Simvastatin	75		hyperlipidemia		mg	qd/od	Yes	PO	Yes	No	04_013	01JAN12	01JAN2012			04	Entered	64	Female	15FEB16	130	MF4637	<250 mg/day	No	Yes	<250 mg/day	No	Yes	Yes	Yes	Yes
2	levothroid	75		hypothyroidism		mg	qd/od	Yes	PO	Yes	No	04_013	01JAN12	01JAN2012			04	Entered	64	Female	15FEB16	130	MF4637	<250 mg/day	No	Yes	<250 mg/day	No	Yes	Yes	Yes	Yes
3	advir	250		asthma		puff	bid	Yes	inh	Yes	No	04_013	01JAN13	01JAN2013			04	Entered	64	Female	15FEB16	130	MF4637	<250 mg/day	No	Yes	<250 mg/day	No	Yes	Yes	Yes	Yes
4	proair	90		asthma		puff	prn	Yes	inh	Yes	No	04_013	01JAN13	01JAN2013			04	Entered	64	Female	15FEB16	130	MF4637	<250 mg/day	No	Yes	<250 mg/day	No	Yes	Yes	Yes	Yes
1	warfarin	2		arrhythmia		mg	qd/od		PO	Yes	No	04_019	01JAN14	01JAN2014	12JUL16	12JUL2016	04	Early Termination	50	Female		200	Placebo	<250 mg/day	No	No	<250 mg/day	No	No	Yes	No	No
2	atenolol	100		arrhythmia		mg	qd/od	Yes	PO	Yes	No	04_019	01JAN14	01JAN2014			04	Early Termination	50	Female		200	Placebo	<250 mg/day	No	No	<250 mg/day	No	No	Yes	No	No
3	levothyroxine	50		Hypothyroidism		mg	qd/od	Yes	PO	Yes	No	04_019	01JAN14	01JAN2014			04	Early Termination	50	Female		200	Placebo	<250 mg/day	No	No	<250 mg/day	No	No	Yes	No	No
1	Metformin	500		Type II diabetes		mg	qd/od	Yes	PO	Yes	No	04_020	01JAN12	01JAN2012			04	Entered	44	Male	28JUL16	196	MF4637	<250 mg/day	Yes	No	<250 mg/day	No	Yes	Yes	Yes	Yes
1	levothyroxine	88		hypothyroidism		mg	qd/od	Yes	PO	Yes	No	04_022	01JAN14	01JAN2014			04	Entered	44	Female	28JUL16	199	Placebo	>=250 mg/day	No	No	>=250 mg/day	No	Yes	Yes	Yes	Yes
1	symbiotic	160/4.5		asthma		puff	bid	Yes	inh	Yes	No	04_023	01JAN14	01JAN2014			04	Entered	56	Male	17AUG16	202	MF4637	>=250 mg/day	No	No	>=250 mg/day	No	Yes	Yes	Yes	Yes
2	albuterol	90		asthma		puff	bid	Yes	inh	Yes	No	04_023	01JAN10	01JAN2010			04	Entered	56	Male	17AUG16	202	MF4637	>=250 mg/day	No	No	>=250 mg/day	No	Yes	Yes	Yes	Yes
1	metformin	1000		diabetes		mg	bid	Yes	PO	Yes	No	04_025	01JAN12	01JAN2012			04	Entered	49	Male	25AUG16	203	MF4637	<250 mg/day	No	No	<250 mg/day	No	Yes	Yes	Yes	Yes
1	ibuorofen	800		migraine		mg	prn	Yes	PO	Yes	No	04_027	01JAN08	01JAN2008			04	Early Termination	39	Female		201	Placebo	>=250 mg/day	No	No	>=250 mg/day	No	No	Yes	No	No
1	advair	250/50		asthma		puff	qd/od	Yes	PO	Yes	No	04_030	01JAN06	01JAN2006			04	Entered	67	Female	15SEP16	216	MF4637	>=250 mg/day	Yes	No	>=250 mg/day	No	Yes	Yes	Yes	Yes
2	oxygen 2L/NC	2	QHS (before bed)	asthma			other (specify)	Yes	IN	Yes	No	04_030	01JAN08	01JAN2008			04	Entered	67	Female	15SEP16	216	MF4637	>=250 mg/day	Yes	No	>=250 mg/day	No	Yes	Yes	Yes	Yes
3	amlodipine	5		Hypertension		mg	qd/od	Yes	PO	Yes	No	04_030	01JAN15	01JAN2015			04	Entered	67	Female	15SEP16	216	MF4637	>=250 mg/day	Yes	No	>=250 mg/day	No	Yes	Yes	Yes	Yes
4	nexium	40		GERD		mg	qd/od	Yes	PO	Yes	No	04_030	01JAN00	01JAN2000			04	Entered	67	Female	15SEP16	216	MF4637	>=250 mg/day	Yes	No	>=250 mg/day	No	Yes	Yes	Yes	Yes
5	glyburide metformin	5/500		type II diabetes		mg	bid	Yes	PO	Yes	No	04_030	01JAN06	01JAN2006			04	Entered	67	Female	15SEP16	216	MF4637	>=250 mg/day	Yes	No	>=250 mg/day	No	Yes	Yes	Yes	Yes
6	ibuprofen	800		athritis		mg	bid	Yes	PO	Yes	No	04_030	01JAN00	01JAN2000			04	Entered	67	Female	15SEP16	216	MF4637	>=250 mg/day	Yes	No	>=250 mg/day	No	Yes	Yes	Yes	Yes
7	mirtazapine	30	QHS (before bed)	depression		mg	other (specify)	Yes	PO	Yes	No	04_030	01JAN15	01JAN2015			04	Entered	67	Female	15SEP16	216	MF4637	>=250 mg/day	Yes	No	>=250 mg/day	No	Yes	Yes	Yes	Yes
8	namenda	10		Mild cognitive impairment		mg	qd/od	Yes	PO	Yes	No	04_030	01JAN13	01JAN2013			04	Entered	67	Female	15SEP16	216	MF4637	>=250 mg/day	Yes	No	>=250 mg/day	No	Yes	Yes	Yes	Yes
9	exelon patch	4.6		mild cognitive impairment			qd/od	Yes	top	Yes	No	04_030	01JAN13	01JAN2013			04	Entered	67	Female	15SEP16	216	MF4637	>=250 mg/day	Yes	No	>=250 mg/day	No	Yes	Yes	Yes	Yes
1	Metformin	500		Hight Blood Sugar		mg	qd/od	Yes	PO	Yes	No	09_015	09FEB10	09FEB2010			09	Entered	72	Male	04OCT16	167	MF4637	>=250 mg/day	Yes	No	<250 mg/day	No	Yes	Yes	Yes	Yes
2	valsartan	320		Hight Blood Presion		mg	qd/od	Yes	PO	Yes	No	09_015	14SEP15	14SEP2015			09	Entered	72	Male	04OCT16	167	MF4637	>=250 mg/day	Yes	No	<250 mg/day	No	Yes	Yes	Yes	Yes
3	Clonidine	0.1		Hight Blood Presion		mg	qd/od	Yes	PO	Yes	No	09_015	14SEP15	14SEP2015			09	Entered	72	Male	04OCT16	167	MF4637	>=250 mg/day	Yes	No	<250 mg/day	No	Yes	Yes	Yes	Yes
1	Allopurinol	300		Gout		mg	qd/od	Yes	PO	Yes	No	09_018		2010			09	Entered	73	Male	14NOV16	105	Placebo	>=250 mg/day	Yes	No	>=250 mg/day	No	Yes	Yes	Yes	Yes
2	Enalapril	10		HTN		mg	qd/od	Yes	PO	Yes	No	09_018		2010			09	Entered	73	Male	14NOV16	105	Placebo	>=250 mg/day	Yes	No	>=250 mg/day	No	Yes	Yes	Yes	Yes
3	Aspirin	325		CAD		mg	qd/od	Yes	PO	Yes	No	09_018		2010			09	Entered	73	Male	14NOV16	105	Placebo	>=250 mg/day	Yes	No	>=250 mg/day	No	Yes	Yes	Yes	Yes
4	Digox	125		CHF		mg	qd/od	Yes	PO	Yes	No	09_018		2010			09	Entered	73	Male	14NOV16	105	Placebo	>=250 mg/day	Yes	No	>=250 mg/day	No	Yes	Yes	Yes	Yes
5	Metformin	500		DM Type 2		mg	qd/od	Yes	PO	Yes	No	09_018		2010			09	Entered	73	Male	14NOV16	105	Placebo	>=250 mg/day	Yes	No	>=250 mg/day	No	Yes	Yes	Yes	Yes
1	Hydroclorothiazide	25		Hypertension		mg	qd/od	Yes	PO	Yes	No	09_024		2010			09	Entered	47	Male	04OCT16	168	Placebo	>=250 mg/day	Yes	No	<250 mg/day	No	Yes	Yes	Yes	No
2	Losartan	100		Hypertension		mg	qd/od	Yes	PO	Yes	No	09_024		2010			09	Entered	47	Male	04OCT16	168	Placebo	>=250 mg/day	Yes	No	<250 mg/day	No	Yes	Yes	Yes	No
3	Clonidine	0.1		Hypertension		mg	qd/od	Yes	PO	Yes	No	09_024		2010			09	Entered	47	Male	04OCT16	168	Placebo	>=250 mg/day	Yes	No	<250 mg/day	No	Yes	Yes	Yes	No
4	Metformin	500		Diabetes		mg	qd/od	Yes	PO	Yes	No	09_024		2010			09	Entered	47	Male	04OCT16	168	Placebo	>=250 mg/day	Yes	No	<250 mg/day	No	Yes	Yes	Yes	No
5	Metropolol	100		Hypertension		mg	qd/od	Yes	PO	Yes	No	09_024		2010			09	Entered	47	Male	04OCT16	168	Placebo	>=250 mg/day	Yes	No	<250 mg/day	No	Yes	Yes	Yes	No
6	Albuterol	3		COPD	1	mL	bid		IN	No	Yes	09_024	20MAR17	20MAR2017	25MAR17	25MAR2017	09	Entered	47	Male	04OCT16	168	Placebo	>=250 mg/day	Yes	No	<250 mg/day	No	Yes	Yes	Yes	No
7	Heparin Sodio	5000		COPD	2	IU	tid		SC	No	Yes	09_024	19MAR17	19MAR2017	19MAR17	19MAR2017	09	Entered	47	Male	04OCT16	168	Placebo	>=250 mg/day	Yes	No	<250 mg/day	No	Yes	Yes	Yes	No
8	Atorvastatin	40		Hypertension		mg	qd/od	Yes	PO	Yes	No	09_024	20MAR17	20MAR2017			09	Entered	47	Male	04OCT16	168	Placebo	>=250 mg/day	Yes	No	<250 mg/day	No	Yes	Yes	Yes	No
9	Insulin Human Lispro	75		Diabetes		IU	tid		SC	No	No	09_024	20MAR17	20MAR2017	27MAR17	27MAR2017	09	Entered	47	Male	04OCT16	168	Placebo	>=250 mg/day	Yes	No	<250 mg/day	No	Yes	Yes	Yes	No
1	allopurinol	300		uric acid nephrolithiasis		mg	qd/od	Yes	PO	Yes	No	10_004		2010			10	Entered	47	Male	01FEB16	172	MF4637	>=250 mg/day	No	No	>=250 mg/day	No	Yes	Yes	Yes	Yes
2	hydrochlorothiazide	50		uric acid nephrolithiasis		mg	qd/od	Yes	PO	Yes	No	10_004	06JAN09	06JAN2009			10	Entered	47	Male	01FEB16	172	MF4637	>=250 mg/day	No	No	>=250 mg/day	No	Yes	Yes	Yes	Yes
3	singulair	10		allergic rhinitis		mg	qd/od	Yes	PO	Yes	No	10_004	20OCT10	20OCT2010			10	Entered	47	Male	01FEB16	172	MF4637	>=250 mg/day	No	No	>=250 mg/day	No	Yes	Yes	Yes	Yes
4	zyrtec	10		allergic rhinitis		mg	qd/od	Yes	PO	Yes	No	10_004		2006			10	Entered	47	Male	01FEB16	172	MF4637	>=250 mg/day	No	No	>=250 mg/day	No	Yes	Yes	Yes	Yes
5	nasacort	2		allergic rhinitis		puff	qd/od	Yes	inh	Yes	No	10_004		2006			10	Entered	47	Male	01FEB16	172	MF4637	>=250 mg/day	No	No	>=250 mg/day	No	Yes	Yes	Yes	Yes
6	Cleocin 1%	1		acne on back	2	tsp	bid		top	Yes	Yes	10_004	14MAR16	14MAR2016	01JUL16	01JUL2016	10	Entered	47	Male	01FEB16	172	MF4637	>=250 mg/day	No	No	>=250 mg/day	No	Yes	Yes	Yes	Yes
1	Celexa	20		Depression/anxiety		mg	qd/od	Yes	PO	Yes	No	10_006	28OCT14	28OCT2014			10	Entered	55	Male	25FEB16	174	Placebo	<250 mg/day	No	No	<250 mg/day	No	Yes	Yes	Yes	Yes
2	ativan	1		Anxiety		mg	prn	Yes	PO	Yes	No	10_006	28JAN16	28JAN2016			10	Entered	55	Male	25FEB16	174	Placebo	<250 mg/day	No	No	<250 mg/day	No	Yes	Yes	Yes	Yes
3	Ambien	5		insomnia		mg	prn	Yes	PO	Yes	No	10_006	27APR11	27APR2011			10	Entered	55	Male	25FEB16	174	Placebo	<250 mg/day	No	No	<250 mg/day	No	Yes	Yes	Yes	Yes
4	alka selzer	2		Heartburn		tab	prn	Yes	PO	No	No	10_006		2000			10	Entered	55	Male	25FEB16	174	Placebo	<250 mg/day	No	No	<250 mg/day	No	Yes	Yes	Yes	Yes
1	loratadine	5		allergic rhinitis		mg	qd/od	Yes	PO	Yes	No	10_007		2010			10	Entered	54	Female	01MAR16	173	MF4637	<250 mg/day	No	Yes	<250 mg/day	No	Yes	Yes	Yes	Yes
2	aspirin	81		heart health		mg	qd/od	Yes	PO	Yes	No	10_007		2001			10	Entered	54	Female	01MAR16	173	MF4637	<250 mg/day	No	Yes	<250 mg/day	No	Yes	Yes	Yes	Yes
3	estradiol	1		postmenopausal		mg	qd/od	Yes	PO	Yes	No	10_007		2000			10	Entered	54	Female	01MAR16	173	MF4637	<250 mg/day	No	Yes	<250 mg/day	No	Yes	Yes	Yes	Yes
4	tramadol	50		low back pain		mg	prn	Yes	PO	Yes	No	10_007		2010			10	Entered	54	Female	01MAR16	173	MF4637	<250 mg/day	No	Yes	<250 mg/day	No	Yes	Yes	Yes	Yes
5	gababentin	600		diabetic neuropathy		mg	tid	Yes	PO	Yes	No	10_007		AUG2015			10	Entered	54	Female	01MAR16	173	MF4637	<250 mg/day	No	Yes	<250 mg/day	No	Yes	Yes	Yes	Yes
6	lisinopril	20		hypertension		mg	bid	Yes	PO	Yes	No	10_007		2007			10	Entered	54	Female	01MAR16	173	MF4637	<250 mg/day	No	Yes	<250 mg/day	No	Yes	Yes	Yes	Yes
7	verapamil	240		hypertension		mg	qd/od	Yes	PO	Yes	No	10_007		2010			10	Entered	54	Female	01MAR16	173	MF4637	<250 mg/day	No	Yes	<250 mg/day	No	Yes	Yes	Yes	Yes
8	zocor	20		dyslipidemia		mg	qd/od	Yes	PO	Yes	No	10_007	19FEB14	19FEB2014			10	Entered	54	Female	01MAR16	173	MF4637	<250 mg/day	No	Yes	<250 mg/day	No	Yes	Yes	Yes	Yes
9	levothyroxine	0.112		hypothyroidism		mg	qd/od	Yes	PO	Yes	No	10_007	26JAN16	26JAN2016			10	Entered	54	Female	01MAR16	173	MF4637	<250 mg/day	No	Yes	<250 mg/day	No	Yes	Yes	Yes	Yes
10	norco 10-325 mg	1		low back pain		tab	prn	Yes	PO	Yes	No	10_007		OCT2014			10	Entered	54	Female	01MAR16	173	MF4637	<250 mg/day	No	Yes	<250 mg/day	No	Yes	Yes	Yes	Yes
11	wellbutrin	150		depression		mg	qd/od	Yes	PO	Yes	No	10_007	15DEC14	15DEC2014			10	Entered	54	Female	01MAR16	173	MF4637	<250 mg/day	No	Yes	<250 mg/day	No	Yes	Yes	Yes	Yes
12	omeprazole	20		gastroesophageal reflux disease		mg	bid	Yes	PO	Yes	No	10_007	11JUL13	11JUL2013			10	Entered	54	Female	01MAR16	173	MF4637	<250 mg/day	No	Yes	<250 mg/day	No	Yes	Yes	Yes	Yes
13	ambien	10	hs	insomnia		mg	other (specify)	Yes	PO	Yes	No	10_007		AUG2015			10	Entered	54	Female	01MAR16	173	MF4637	<250 mg/day	No	Yes	<250 mg/day	No	Yes	Yes	Yes	Yes
14	prozac	20		depression		mg	qd/od	Yes	PO	Yes	No	10_007		AUG2015			10	Entered	54	Female	01MAR16	173	MF4637	<250 mg/day	No	Yes	<250 mg/day	No	Yes	Yes	Yes	Yes
15	horizant	300	hs	restless leg syndrome		mg	other (specify)	Yes	PO	Yes	No	10_007		AUG2015			10	Entered	54	Female	01MAR16	173	MF4637	<250 mg/day	No	Yes	<250 mg/day	No	Yes	Yes	Yes	Yes
16	citlorzoxazone	500		Low back pain		mg	bid	Yes	PO	Yes	No	10_007		AUG2015			10	Entered	54	Female	01MAR16	173	MF4637	<250 mg/day	No	Yes	<250 mg/day	No	Yes	Yes	Yes	Yes
17	cranberry plus vitamin C	8400		nutritional supplement/ urinary tract infection prophylaxis		mg	qd/od	Yes	PO	Yes	No	10_007		2010			10	Entered	54	Female	01MAR16	173	MF4637	<250 mg/day	No	Yes	<250 mg/day	No	Yes	Yes	Yes	Yes
1	Aleve	1		headache	1	tab	prn		PO	Yes	Yes	10_009	01AUG16	01AUG2016	01AUG16	01AUG2016	10	Entered	64	Female	27JUN16	176	MF4637	<250 mg/day	No	No	<250 mg/day	No	Yes	Yes	Yes	Yes
2	BC Powder	1	Once	Headache	2	tab	other (specify)		PO	Yes	Yes	10_009	16AUG16	16AUG2016	16AUG16	16AUG2016	10	Entered	64	Female	27JUN16	176	MF4637	<250 mg/day	No	No	<250 mg/day	No	Yes	Yes	Yes	Yes
3	Ocuvite with Lutein	1		Promote eye health		tab	qd/od	Yes	PO	Yes	No	10_009	12SEP16	12SEP2016			10	Entered	64	Female	27JUN16	176	MF4637	<250 mg/day	No	No	<250 mg/day	No	Yes	Yes	Yes	Yes
4	influenza vaccine	0.5	once	prophylaxis influenza		mL	other (specify)		IM	Yes	No	10_009	12DEC16	12DEC2016	12DEC16	12DEC2016	10	Entered	64	Female	27JUN16	176	MF4637	<250 mg/day	No	No	<250 mg/day	No	Yes	Yes	Yes	Yes
5	pneumococcal polysaccharide	0.5	once	prophylaxis pneumococcal pneumonia		mL	other (specify)		IM	Yes	No	10_009	12DEC16	12DEC2016	12DEC16	12DEC2016	10	Entered	64	Female	27JUN16	176	MF4637	<250 mg/day	No	No	<250 mg/day	No	Yes	Yes	Yes	Yes
6	zostivax	0.65	once	prophylaxis shingles		mL	other (specify)		SC	Yes	No	10_009	12DEC16	12DEC2016	12DEC16	12DEC2016	10	Entered	64	Female	27JUN16	176	MF4637	<250 mg/day	No	No	<250 mg/day	No	Yes	Yes	Yes	Yes
7	lamisil	250		onychia left great toe	3	mg	qd/od	Yes	PO	Yes	Yes	10_009	12DEC16	12DEC2016			10	Entered	64	Female	27JUN16	176	MF4637	<250 mg/day	No	No	<250 mg/day	No	Yes	Yes	Yes	Yes
1	zyloprim	300		Gout		mg	qd/od	Yes	PO	Yes	No	10_010	05NOV15	05NOV2015			10	Entered	34	Male	27SEP16	175	Placebo	>=250 mg/day	No	No	>=250 mg/day	No	Yes	Yes	Yes	Yes
2	cholchicine	0.6		Gout		mg	qd/od	Yes	PO	Yes	No	10_010		2010			10	Entered	34	Male	27SEP16	175	Placebo	>=250 mg/day	No	No	>=250 mg/day	No	Yes	Yes	Yes	Yes
3	meloxicam	7.5		Gout		mg	prn	Yes	PO	Yes	No	10_010		2014			10	Entered	34	Male	27SEP16	175	Placebo	>=250 mg/day	No	No	>=250 mg/day	No	Yes	Yes	Yes	Yes
4	Lofibra	160		Hyperlipidemia		mg	qd/od		PO	No	No	10_010	05NOV15	05NOV2015	29AUG16	29AUG2016	10	Entered	34	Male	27SEP16	175	Placebo	>=250 mg/day	No	No	>=250 mg/day	No	Yes	Yes	Yes	Yes
1	maxalt	10		migraine headaches		mg	prn	Yes	PO	Yes	No	10_012		2006			10	Entered	53	Male	12OCT16	177	Placebo	<250 mg/day	No	Yes	<250 mg/day	No	Yes	Yes	Yes	Yes
2	zocor	40		dyslipidemia		mg	qd/od	Yes	PO	Yes	No	10_012		2006			10	Entered	53	Male	12OCT16	177	Placebo	<250 mg/day	No	Yes	<250 mg/day	No	Yes	Yes	Yes	Yes
3	ambien	10		insomnia		mg	prn	Yes	PO	Yes	No	10_012	17DEC15	17DEC2015			10	Entered	53	Male	12OCT16	177	Placebo	<250 mg/day	No	Yes	<250 mg/day	No	Yes	Yes	Yes	Yes
4	viagra	50		erectile dysfunction		mg	prn	Yes	PO	Yes	No	10_012	17DEC15	17DEC2015			10	Entered	53	Male	12OCT16	177	Placebo	<250 mg/day	No	Yes	<250 mg/day	No	Yes	Yes	Yes	Yes
5	corgard	40		hypertension		mg	qd/od	Yes	PO	Yes	No	10_012	22AUG16	22AUG2016			10	Entered	53	Male	12OCT16	177	Placebo	<250 mg/day	No	Yes	<250 mg/day	No	Yes	Yes	Yes	Yes
6	prilosec	20		gastrpesophageal reflux disease		mg	qd/od	Yes	PO	Yes	No	10_012	21SEP16	21SEP2016			10	Entered	53	Male	12OCT16	177	Placebo	<250 mg/day	No	Yes	<250 mg/day	No	Yes	Yes	Yes	Yes
1	STELARA	45	Q3M	PSORIASIS		mg	other (specify)	Yes	SC	Yes	No	11_003		JUN2016			11	Early Termination	52	Male	15SEP16	142	Placebo	<250 mg/day	Yes	Yes	>=250 mg/day	No	Yes	Yes	Yes	Yes
2	PSYLLIUM	UNK		DIVERTICULITIS			qd/od		PO	Yes	No	11_003		JUL2016		JUL2016	11	Early Termination	52	Male	15SEP16	142	Placebo	<250 mg/day	Yes	Yes	>=250 mg/day	No	Yes	Yes	Yes	Yes
3	METFORMIN	1000		DIABETES MELLITUS TYPE II		mg	qd/od	Yes	PO	Yes	No	11_003		2015			11	Early Termination	52	Male	15SEP16	142	Placebo	<250 mg/day	Yes	Yes	>=250 mg/day	No	Yes	Yes	Yes	Yes
4	ATORVASTATIN	20		HYPERLIPIDEMIA		mg	qd/od	Yes	PO	Yes	No	11_003		2015			11	Early Termination	52	Male	15SEP16	142	Placebo	<250 mg/day	Yes	Yes	>=250 mg/day	No	Yes	Yes	Yes	Yes
5	TRAZADONE	50		INSOMNIA		mg	qd/od	Yes	PO	Yes	No	11_003		2015			11	Early Termination	52	Male	15SEP16	142	Placebo	<250 mg/day	Yes	Yes	>=250 mg/day	No	Yes	Yes	Yes	Yes
6	MULTIVITAMINS	1		SUPPLEMENTAL		cap	qd/od	Yes	PO	Yes	No	11_003		2016			11	Early Termination	52	Male	15SEP16	142	Placebo	<250 mg/day	Yes	Yes	>=250 mg/day	No	Yes	Yes	Yes	Yes
1	SINGULAIR	1		SEASONAL ALLERGIES		tab	qd/od	Yes	PO	Yes	No	11_004		MAR2016			11	Entered	42	Female	02SEP16	140	MF4637	<250 mg/day	Yes	No	<250 mg/day	No	Yes	Yes	Yes	Yes
2	TUMS	2		HEARTBURN		tab	prn	Yes	PO	Yes	No	11_004		2001			11	Entered	42	Female	02SEP16	140	MF4637	<250 mg/day	Yes	No	<250 mg/day	No	Yes	Yes	Yes	Yes
3	VITAMIN D	1000		VITAMIN D DEFICIENCY		IU	qd/od	Yes	PO	Yes	No	11_004		2008			11	Entered	42	Female	02SEP16	140	MF4637	<250 mg/day	Yes	No	<250 mg/day	No	Yes	Yes	Yes	Yes
4	METFORMIN	1000		DIABETES MELLITUS ii		mg	bid		PO	Yes	No	11_004		JUL2016	05NOV16	05NOV2016	11	Entered	42	Female	02SEP16	140	MF4637	<250 mg/day	Yes	No	<250 mg/day	No	Yes	Yes	Yes	Yes
5	LISINOPRIL	10		RENAL PROHYLAXIS		mg	qd/od	Yes	PO	Yes	No	11_004		2015			11	Entered	42	Female	02SEP16	140	MF4637	<250 mg/day	Yes	No	<250 mg/day	No	Yes	Yes	Yes	Yes
6	AMOXICILIN	125		UPPER RESPIRATORY INFECTION	1	mg	bid		PO	Yes	Yes	11_004	12OCT16	12OCT2016	20OCT16	20OCT2016	11	Entered	42	Female	02SEP16	140	MF4637	<250 mg/day	Yes	No	<250 mg/day	No	Yes	Yes	Yes	Yes
7	IBUPROFEN	800		UPPER RESPIRATORY INFECTION	1	mg	tid		PO	Yes	Yes	11_004	12OCT16	12OCT2016	20OCT16	20OCT2016	11	Entered	42	Female	02SEP16	140	MF4637	<250 mg/day	Yes	No	<250 mg/day	No	Yes	Yes	Yes	Yes
8	FARXIGA	5		DIABETES MELLITUS TYPE II		mg	qd/od	Yes	PO	Yes	No	11_004	06NOV16	06NOV2016			11	Entered	42	Female	02SEP16	140	MF4637	<250 mg/day	Yes	No	<250 mg/day	No	Yes	Yes	Yes	Yes
9	PIOGLITAZONE	15		DIABETES MELLITUS TYPE II		mg	qd/od	Yes	PO	Yes	No	11_004	06NOV16	06NOV2016			11	Entered	42	Female	02SEP16	140	MF4637	<250 mg/day	Yes	No	<250 mg/day	No	Yes	Yes	Yes	Yes
1	LISINOPRIL	25MG		HYPERTENSION		mg	qd/od	Yes	PO	Yes	No	11_005		2015			11	Early Termination	63	Male	26SEP16	141	MF4637	>=250 mg/day	No	No	>=250 mg/day	No	Yes	Yes	No	No
1	DEXILANT	60		GERD		mg	qd/od	Yes	PO	Yes	No	11_006		2014			11	Entered	54	Female	29SEP16	146	Placebo	<250 mg/day	Yes	No	>=250 mg/day	No	Yes	Yes	Yes	Yes
2	METFORMIN	500		DIABETES MELLITUS TYPE II		mg	qd/od	Yes	PO	Yes	No	11_006		2014			11	Entered	54	Female	29SEP16	146	Placebo	<250 mg/day	Yes	No	>=250 mg/day	No	Yes	Yes	Yes	Yes
3	CALCIUM	2000		PROPHYLAXIS		mg	qd/od	Yes	PO	Yes	No	11_006		2008			11	Entered	54	Female	29SEP16	146	Placebo	<250 mg/day	Yes	No	>=250 mg/day	No	Yes	Yes	Yes	Yes
4	ATORVASTATIN	20		WORSENING OF HYPERLIPIDEMIA	1	mg	qd/od	Yes	PO	Yes	Yes	11_006	14OCT16	14OCT2016			11	Entered	54	Female	29SEP16	146	Placebo	<250 mg/day	Yes	No	>=250 mg/day	No	Yes	Yes	Yes	Yes
1	ESTRADIOL	0.5		MENOPAUSE SYMPTOMS		mg	prn	Yes	PO	Yes	No	11_009		2006			11	Entered	50	Female	01OCT16	147	Placebo	<250 mg/day	No	No	<250 mg/day	No	Yes	Yes	Yes	Yes
2	CALCIUM	1800		PROPHYLAXIS		mg	qd/od	Yes	PO	Yes	No	11_009		2006			11	Entered	50	Female	01OCT16	147	Placebo	<250 mg/day	No	No	<250 mg/day	No	Yes	Yes	Yes	Yes
3	VITAMIN D	2000		PROPHYLAXISS		IU	qd/od	Yes	PO	Yes	No	11_009		2006			11	Entered	50	Female	01OCT16	147	Placebo	<250 mg/day	No	No	<250 mg/day	No	Yes	Yes	Yes	Yes
4	NAPROXEN	500		CHRONIC BACK PAIN		mg	prn	Yes	PO	Yes	No	11_009		2000			11	Entered	50	Female	01OCT16	147	Placebo	<250 mg/day	No	No	<250 mg/day	No	Yes	Yes	Yes	Yes
1	METOPROLOL	50		TACHYCARDIA		mg	qd/od	Yes	PO	Yes	No	11_010		JAN2016			11	Entered	52	Female	27SEP16	143	Placebo	<250 mg/day	No	Yes	<250 mg/day	No	Yes	Yes	Yes	Yes
2	SYNTHROID	75		HYPOTHIROIDISM		ug	qd/od	Yes	PO	Yes	No	11_010		2000			11	Entered	52	Female	27SEP16	143	Placebo	<250 mg/day	No	Yes	<250 mg/day	No	Yes	Yes	Yes	Yes
3	ATORVASTATIN	10		HYPERLIPIDEMIA		mg	qd/od		PO	Yes	No	11_010		2016	01DEC16	01DEC2016	11	Entered	52	Female	27SEP16	143	Placebo	<250 mg/day	No	Yes	<250 mg/day	No	Yes	Yes	Yes	Yes
4	EFEXER ER	300		MAJOR DEPRESSION DISORDER		mg	qd/od	Yes	PO	Yes	No	11_010		2014			11	Entered	52	Female	27SEP16	143	Placebo	<250 mg/day	No	Yes	<250 mg/day	No	Yes	Yes	Yes	Yes
5	AMBIEN	5		SLEEP DISORDER		mg	qd/od	Yes	PO	Yes	No	11_010		2015			11	Entered	52	Female	27SEP16	143	Placebo	<250 mg/day	No	Yes	<250 mg/day	No	Yes	Yes	Yes	Yes
6	VITAMIN E	400		NUTRITIONAL SUPPLEMENT		IU	qd/od	Yes	PO	Yes	No	11_010		2006			11	Entered	52	Female	27SEP16	143	Placebo	<250 mg/day	No	Yes	<250 mg/day	No	Yes	Yes	Yes	Yes
7	VITAMIN B	100		NUTRITIONAL SUPPLEMENT		mg	qd/od	Yes	PO	Yes	No	11_010		2006			11	Entered	52	Female	27SEP16	143	Placebo	<250 mg/day	No	Yes	<250 mg/day	No	Yes	Yes	Yes	Yes
8	IRON	25		NUTRITONAL SUPPLEMENT		mg	qd/od	Yes	PO	Yes	No	11_010		2006			11	Entered	52	Female	27SEP16	143	Placebo	<250 mg/day	No	Yes	<250 mg/day	No	Yes	Yes	Yes	Yes
9	CoQ10	200		NUTRITIONAL SUPPLEMENT		mg	qd/od	Yes	PO	Yes	No	11_010		2006			11	Entered	52	Female	27SEP16	143	Placebo	<250 mg/day	No	Yes	<250 mg/day	No	Yes	Yes	Yes	Yes
10	MILK THISTLE	140		NUTRITIONAL SUPLEMENT		mg	qd/od	Yes	PO	Yes	No	11_010		2006			11	Entered	52	Female	27SEP16	143	Placebo	<250 mg/day	No	Yes	<250 mg/day	No	Yes	Yes	Yes	Yes
11	MULTIVITAMIN INMUNE SYSTEM BOOSTER	450		NUTRITIONAL SUPPLEMENT		mg	qd/od	Yes	PO	Yes	No	11_010		2006			11	Entered	52	Female	27SEP16	143	Placebo	<250 mg/day	No	Yes	<250 mg/day	No	Yes	Yes	Yes	Yes
12	Excedrin	un		MIGRAINES			prn	Yes	PO	Yes	No	11_010		2013			11	Entered	52	Female	27SEP16	143	Placebo	<250 mg/day	No	Yes	<250 mg/day	No	Yes	Yes	Yes	Yes
13	CALCIUM CITRATE	500		NUTRITIONAL SUPPLEMENT		mg	qd/od	Yes	PO	Yes	No	11_010		2006			11	Entered	52	Female	27SEP16	143	Placebo	<250 mg/day	No	Yes	<250 mg/day	No	Yes	Yes	Yes	Yes
1	COLESTIPOL	1		IBS		g	qd/od	Yes	PO	Yes	No	11_011		2014			11	Entered	41	Female	19OCT16	244	Placebo	<250 mg/day	No	No	>=250 mg/day	No	Yes	Yes	Yes	Yes
2	LEVOTHYROXINE	1.25		HYPOTHIROIDISM		ug	qd/od		PO	Yes	No	11_011		2013	16NOV16	16NOV2016	11	Entered	41	Female	19OCT16	244	Placebo	<250 mg/day	No	No	>=250 mg/day	No	Yes	Yes	Yes	Yes
3	AMBIEN	10		INSOMNIA		mg	prn	Yes	PO	Yes	No	11_011		2004			11	Entered	41	Female	19OCT16	244	Placebo	<250 mg/day	No	No	>=250 mg/day	No	Yes	Yes	Yes	Yes
1	LOSARTAN-HCTZ	25		HYPERTESION		mg	qd/od	Yes	PO	Yes	No	11_012	21SEP16	21SEP2016			11	Entered	40	Female	18OCT16	145	MF4637	<250 mg/day	No	No	<250 mg/day	No	Yes	Yes	Yes	Yes
2	PANTOPRAZOLE	40		GERD		mg	qd/od	Yes	PO	Yes	No	11_012	26JUL16	26JUL2016			11	Entered	40	Female	18OCT16	145	MF4637	<250 mg/day	No	No	<250 mg/day	No	Yes	Yes	Yes	Yes
3	DEXILANT	60		GERD		mg	qd/od		PO	No	No	11_012		2014	25JUL16	25JUL2016	11	Entered	40	Female	18OCT16	145	MF4637	<250 mg/day	No	No	<250 mg/day	No	Yes	Yes	Yes	Yes
4	IRON	65		NUTRITION SUPPORT		mg	qd/od	Yes	PO	Yes	No	11_012		2005			11	Entered	40	Female	18OCT16	145	MF4637	<250 mg/day	No	No	<250 mg/day	No	Yes	Yes	Yes	Yes
5	VITAMIN D	2000		NUTRITION SUPPORT		mg	qd/od	Yes	PO	Yes	No	11_012		2005			11	Entered	40	Female	18OCT16	145	MF4637	<250 mg/day	No	No	<250 mg/day	No	Yes	Yes	Yes	Yes
1	PROTONIX	40		GERD		mg	qd/od	Yes	PO	Yes	No	11_014		2005			11	Entered	49	Female	17NOV16	247	Placebo	>=250 mg/day	No	No	>=250 mg/day	No	Yes	Yes	Yes	No
1	VALSARTAN	160		HYPERTENSION		mg	qd/od	Yes	PO	Yes	No	11_015		2000			11	Entered	62	Male	10NOV16	245	MF4637	<250 mg/day	No	No	>=250 mg/day	No	Yes	Yes	Yes	Yes
2	ZOCOR	20		CORONARY ARTERY DISEASE		mg	qd/od	Yes	PO	Yes	No	11_015		2012			11	Entered	62	Male	10NOV16	245	MF4637	<250 mg/day	No	No	>=250 mg/day	No	Yes	Yes	Yes	Yes
3	OMEPRAZOLE	20		GERD		mg	prn	Yes	PO	Yes	No	11_015		2008			11	Entered	62	Male	10NOV16	245	MF4637	<250 mg/day	No	No	>=250 mg/day	No	Yes	Yes	Yes	Yes
4	VITAMIN D	5000		CIATICA		IU	qd/od	Yes	PO	Yes	No	11_015		2009			11	Entered	62	Male	10NOV16	245	MF4637	<250 mg/day	No	No	>=250 mg/day	No	Yes	Yes	Yes	Yes
5	OXYCODONE	10		CHRONIC BACK PAIN		mg	prn	Yes	PO	Yes	No	11_015		2014			11	Entered	62	Male	10NOV16	245	MF4637	<250 mg/day	No	No	>=250 mg/day	No	Yes	Yes	Yes	Yes
6	XANAX	0.25		CHRONIC BACK PAIN		mg	prn	Yes	PO	Yes	No	11_015		2014			11	Entered	62	Male	10NOV16	245	MF4637	<250 mg/day	No	No	>=250 mg/day	No	Yes	Yes	Yes	Yes
7	VITAMIN B12	1000		NUTRITIONAL SUPPORT		ug	qd/od	Yes	PO	Yes	No	11_015		2010			11	Entered	62	Male	10NOV16	245	MF4637	<250 mg/day	No	No	>=250 mg/day	No	Yes	Yes	Yes	Yes
8	VITAMIN B6	50		NUTRITIONAL SUPPORT		mg	qd/od	Yes	PO	Yes	No	11_015		2010			11	Entered	62	Male	10NOV16	245	MF4637	<250 mg/day	No	No	>=250 mg/day	No	Yes	Yes	Yes	Yes
1	MULTIVITAMINS	UNK		NUTRITIONAL SUPPLEMENT		IU	qd/od	Yes	PO	Yes	No	11_016		2006			11	Screen Failure	55	Female							>=250 mg/day	Yes	No	No	No	No
1	SERTRALINE HCL	50		DEPRESSION		mg	qd/od	Yes	PO	Yes	No	12_001		2014			12	Entered	66	Male	14OCT16	257	MF4637	>=250 mg/day	Yes	Yes	>=250 mg/day	No	Yes	Yes	Yes	Yes
2	ESOMEPRAZOLE	40		GERD		mg	qd/od	Yes	PO	Yes	No	12_001		2014			12	Entered	66	Male	14OCT16	257	MF4637	>=250 mg/day	Yes	Yes	>=250 mg/day	No	Yes	Yes	Yes	Yes
3	BREO ELLIPTA	25/100		COPD		ug	qd/od	Yes	inh	Yes	No	12_001		2010			12	Entered	66	Male	14OCT16	257	MF4637	>=250 mg/day	Yes	Yes	>=250 mg/day	No	Yes	Yes	Yes	Yes
4	DILTIAZEM	120		HYPERTENSION		mg	qd/od	Yes	PO	Yes	No	12_001		2010			12	Entered	66	Male	14OCT16	257	MF4637	>=250 mg/day	Yes	Yes	>=250 mg/day	No	Yes	Yes	Yes	Yes
5	JANUMET	50/500		DIABETES MELLITUS TYPE II		mg	qd/od	Yes	PO	Yes	No	12_001		2014			12	Entered	66	Male	14OCT16	257	MF4637	>=250 mg/day	Yes	Yes	>=250 mg/day	No	Yes	Yes	Yes	Yes
6	GLIMEPIRIDE	2		DIABETES MELLITUS TYPE II		mg	qd/od	Yes	PO	Yes	No	12_001		2014			12	Entered	66	Male	14OCT16	257	MF4637	>=250 mg/day	Yes	Yes	>=250 mg/day	No	Yes	Yes	Yes	Yes
7	CILOSTAZOL	50		PERIPHERAL VASCULAR DISEASE		mg	qd/od	Yes	PO	Yes	No	12_001	06SEP16	06SEP2016			12	Entered	66	Male	14OCT16	257	MF4637	>=250 mg/day	Yes	Yes	>=250 mg/day	No	Yes	Yes	Yes	Yes
8	BYSTOLIC	5		HYPERTENSION		mg	qd/od	Yes	PO	Yes	No	12_001		2014			12	Entered	66	Male	14OCT16	257	MF4637	>=250 mg/day	Yes	Yes	>=250 mg/day	No	Yes	Yes	Yes	Yes
9	ALFUZOSIN HCL	10		BENIGN PROSTATIC HYPERTROPHY		mg	qd/od	Yes	PO	Yes	No	12_001		2014			12	Entered	66	Male	14OCT16	257	MF4637	>=250 mg/day	Yes	Yes	>=250 mg/day	No	Yes	Yes	Yes	Yes
10	VACESPA	1		DYSLIPIDEMIA		g	qd/od		PO	Yes	No	12_001	24APR16	24APR2016	08SEP16	08SEP2016	12	Entered	66	Male	14OCT16	257	MF4637	>=250 mg/day	Yes	Yes	>=250 mg/day	No	Yes	Yes	Yes	Yes
11	ROSUVASTATIN	20		DYSLIPIDEMIA		mg	qd/od	Yes	PO	Yes	No	12_001	11APR16	11APR2016			12	Entered	66	Male	14OCT16	257	MF4637	>=250 mg/day	Yes	Yes	>=250 mg/day	No	Yes	Yes	Yes	Yes
12	OMEGA 3	1		SUPPLEMENT		g	qd/od		PO	Yes	No	12_001	11APR16	11APR2016	20AUG16	20AUG2016	12	Entered	66	Male	14OCT16	257	MF4637	>=250 mg/day	Yes	Yes	>=250 mg/day	No	Yes	Yes	Yes	Yes
13	KETOCONAZOLE SHAMPOO	1	b.i.s	SEBORRHEIC DERMATITIS		g	other (specify)	Yes	top	Yes	No	12_001	27APR16	27APR2016			12	Entered	66	Male	14OCT16	257	MF4637	>=250 mg/day	Yes	Yes	>=250 mg/day	No	Yes	Yes	Yes	Yes
14	FAMOTIDINE	20		GERD		mg	qd/od	Yes	PO	Yes	No	12_001	14JUL16	14JUL2016			12	Entered	66	Male	14OCT16	257	MF4637	>=250 mg/day	Yes	Yes	>=250 mg/day	No	Yes	Yes	Yes	Yes
15	PROCTOZONE	1		PROCTITIS		g	bid	Yes	rec	Yes	No	12_001	19AUG16	19AUG2016			12	Entered	66	Male	14OCT16	257	MF4637	>=250 mg/day	Yes	Yes	>=250 mg/day	No	Yes	Yes	Yes	Yes
16	VOLTAREN GEL	1		MUSCLE PAIN		g	bid	Yes	top	Yes	No	12_001	09AUG16	09AUG2016			12	Entered	66	Male	14OCT16	257	MF4637	>=250 mg/day	Yes	Yes	>=250 mg/day	No	Yes	Yes	Yes	Yes
17	CLOPIDOGREL	75		PERIPHERAL VASCULAR DISEASE		mg	qd/od		PO	Yes	No	12_001		2014	04SEP16	04SEP2016	12	Entered	66	Male	14OCT16	257	MF4637	>=250 mg/day	Yes	Yes	>=250 mg/day	No	Yes	Yes	Yes	Yes
18	ALBUTEROL 0.083%	1		COPD		mL	tid	Yes	inh	Yes	No	12_001		2014			12	Entered	66	Male	14OCT16	257	MF4637	>=250 mg/day	Yes	Yes	>=250 mg/day	No	Yes	Yes	Yes	Yes
19	PATADAY	2		ALLERGIC CONJUNCTIVITIS		mL	qd/od	Yes	eye	Yes	No	12_001		2014			12	Entered	66	Male	14OCT16	257	MF4637	>=250 mg/day	Yes	Yes	>=250 mg/day	No	Yes	Yes	Yes	Yes
20	AZYTHROMYCIN	250		UPPER RESPIRATORY TRACT INFECTION	1	mg	qd/od		PO	Yes	Yes	12_001	20NOV16	20NOV2016	24NOV16	24NOV2016	12	Entered	66	Male	14OCT16	257	MF4637	>=250 mg/day	Yes	Yes	>=250 mg/day	No	Yes	Yes	Yes	Yes
1	METFORMIN	1000		DIABETES MELLITUS TYPE II		mg	bid	Yes	PO	Yes	No	12_003		2015			12	Entered	52	Male	11OCT16	138	Placebo	>=250 mg/day	Yes	No	>=250 mg/day	No	Yes	Yes	Yes	Yes
2	LISINOPRIL	20		HYPERTENSION		mg	qd/od	Yes	PO	Yes	No	12_003		2012			12	Entered	52	Male	11OCT16	138	Placebo	>=250 mg/day	Yes	No	>=250 mg/day	No	Yes	Yes	Yes	Yes
3	VITAMIN D3	2000		VITAMIN D DEFICIENCY		IU	qd/od	Yes	PO	Yes	No	12_003		03UNK2016			12	Entered	52	Male	11OCT16	138	Placebo	>=250 mg/day	Yes	No	>=250 mg/day	No	Yes	Yes	Yes	Yes
4	FENOFIBRATE	145		DYSLIPIDEMIA		mg	qd/od		PO	No	No	12_003		2015	12SEP16	12SEP2016	12	Entered	52	Male	11OCT16	138	Placebo	>=250 mg/day	Yes	No	>=250 mg/day	No	Yes	Yes	Yes	Yes
1	METFORMIN	850		DIABETES MELLITUS TYPE II		mg	bid	Yes	PO	Yes	No	12_004		2006			12	Entered	70	Male	22SEP16	133	Placebo	>=250 mg/day	Yes	Yes	>=250 mg/day	No	Yes	Yes	Yes	Yes
2	VALSARTAN	40		HYPERTENSION		mg	qd/od	Yes	PO	Yes	No	12_004		2006			12	Entered	70	Male	22SEP16	133	Placebo	>=250 mg/day	Yes	Yes	>=250 mg/day	No	Yes	Yes	Yes	Yes
3	SIMVASTATIN	40		DYSLIPIDEMIA		mg	qd/od	Yes	PO	Yes	No	12_004		07UNK2016			12	Entered	70	Male	22SEP16	133	Placebo	>=250 mg/day	Yes	Yes	>=250 mg/day	No	Yes	Yes	Yes	Yes
4	OMEPRAZOLE	40		GERD		mg	qd/od	Yes	PO	Yes	No	12_004		05UNK2016			12	Entered	70	Male	22SEP16	133	Placebo	>=250 mg/day	Yes	Yes	>=250 mg/day	No	Yes	Yes	Yes	Yes
5	TAMSULOSIN	0.4		BENIGN PROSTATIC HYPERTROPHY		mg	qd/od	Yes	PO	Yes	No	12_004		05UNK2016			12	Entered	70	Male	22SEP16	133	Placebo	>=250 mg/day	Yes	Yes	>=250 mg/day	No	Yes	Yes	Yes	Yes
6	VIAGRA	100		ERECTILE DYSFUNCTION		mg	prn	Yes	PO	Yes	No	12_004		2015			12	Entered	70	Male	22SEP16	133	Placebo	>=250 mg/day	Yes	Yes	>=250 mg/day	No	Yes	Yes	Yes	Yes
7	ESCITALOPRAM	15		DEPRESSION		mg	qd/od	Yes	PO	Yes	No	12_004	19AUG16	19AUG2016			12	Entered	70	Male	22SEP16	133	Placebo	>=250 mg/day	Yes	Yes	>=250 mg/day	No	Yes	Yes	Yes	Yes
8	TEMAZEPAM	30		INSOMNIA		mg	qd/od	Yes	PO	Yes	No	12_004	19AUG16	19AUG2016			12	Entered	70	Male	22SEP16	133	Placebo	>=250 mg/day	Yes	Yes	>=250 mg/day	No	Yes	Yes	Yes	Yes
1	LANTUS	20		DIABETES MELLITUS TYPE II		IU	qd/od	Yes	SC	Yes	No	12_006		2008			12	Entered	76	Female	22SEP16	132	MF4637	<250 mg/day	Yes	Yes	<250 mg/day	No	Yes	Yes	Yes	Yes
2	VALSARTAN/HYDROCHLOROTHIAZIDE	320/25		HYPERTENSION		mg	qd/od	Yes	PO	Yes	No	12_006		2009			12	Entered	76	Female	22SEP16	132	MF4637	<250 mg/day	Yes	Yes	<250 mg/day	No	Yes	Yes	Yes	Yes
3	CLONIDINE	0.2		HYPERTENSION		mg	qd/od	Yes	PO	Yes	No	12_006		2009			12	Entered	76	Female	22SEP16	132	MF4637	<250 mg/day	Yes	Yes	<250 mg/day	No	Yes	Yes	Yes	Yes
4	BYSTOLIC	5		HYPERTENSION		mg	qd/od	Yes	PO	Yes	No	12_006		2011			12	Entered	76	Female	22SEP16	132	MF4637	<250 mg/day	Yes	Yes	<250 mg/day	No	Yes	Yes	Yes	Yes
5	GABAPENTIN	300		DIABETIC NEUROPATHY		mg	qd/od	Yes	PO	Yes	No	12_006		2013			12	Entered	76	Female	22SEP16	132	MF4637	<250 mg/day	Yes	Yes	<250 mg/day	No	Yes	Yes	Yes	Yes
6	PENTOXIFYLLINE	400		PERIPHERAL VASCULAR DISEASE		mg	bid	Yes	PO	Yes	No	12_006		05UNK2016			12	Entered	76	Female	22SEP16	132	MF4637	<250 mg/day	Yes	Yes	<250 mg/day	No	Yes	Yes	Yes	Yes
7	ROSUVASTATIN	20		DYSLIPIDEMIA		mg	qd/od	Yes	PO	Yes	No	12_006		2015			12	Entered	76	Female	22SEP16	132	MF4637	<250 mg/day	Yes	Yes	<250 mg/day	No	Yes	Yes	Yes	Yes
8	ASPIRIN	81		PROPHYLACTIC		mg	qd/od	Yes	PO	Yes	No	12_006		2008			12	Entered	76	Female	22SEP16	132	MF4637	<250 mg/day	Yes	Yes	<250 mg/day	No	Yes	Yes	Yes	Yes
9	OMEPRAZOLE	40		GASTRITIS		mg	qd/od	Yes	PO	Yes	No	12_006		2015			12	Entered	76	Female	22SEP16	132	MF4637	<250 mg/day	Yes	Yes	<250 mg/day	No	Yes	Yes	Yes	Yes
10	MEMANTINE	10		MEMORY LOSS		mg	qd/od	Yes	PO	Yes	No	12_006		2015			12	Entered	76	Female	22SEP16	132	MF4637	<250 mg/day	Yes	Yes	<250 mg/day	No	Yes	Yes	Yes	Yes
1	BUDESONIDE/FORMOTEROL	160/4.5		ASTHMA		ug	bid	Yes	inh	Yes	No	12_007		2015			12	Entered	64	Female	30SEP16	134	Placebo	>=250 mg/day	No	Yes	>=250 mg/day	No	Yes	Yes	Yes	Yes
2	VENLAFAXINE	150		DEPRESSION		mg	qd/od	Yes	PO	Yes	No	12_007		2014			12	Entered	64	Female	30SEP16	134	Placebo	>=250 mg/day	No	Yes	>=250 mg/day	No	Yes	Yes	Yes	Yes
3	ATORVASTATIN	20		DYSLIPIDEMIA		mg	qd/od	Yes	PO	Yes	No	12_007		2012			12	Entered	64	Female	30SEP16	134	Placebo	>=250 mg/day	No	Yes	>=250 mg/day	No	Yes	Yes	Yes	Yes
4	TEMAZEPAM	30		INSOMNIA		mg	qd/od	Yes	PO	Yes	No	12_007		2002			12	Entered	64	Female	30SEP16	134	Placebo	>=250 mg/day	No	Yes	>=250 mg/day	No	Yes	Yes	Yes	Yes
5	MIRTAZAPINE	45		DEPRESSION		mg	qd/od	Yes	PO	Yes	No	12_007		2014			12	Entered	64	Female	30SEP16	134	Placebo	>=250 mg/day	No	Yes	>=250 mg/day	No	Yes	Yes	Yes	Yes
6	HYDROCHLOROTHIAZIDE	12.5		HYPERTENSION		mg	qd/od	Yes	PO	Yes	No	12_007		2004			12	Entered	64	Female	30SEP16	134	Placebo	>=250 mg/day	No	Yes	>=250 mg/day	No	Yes	Yes	Yes	Yes
7	VALSARTAN	120		HYPERTENSION		mg	qd/od	Yes	PO	Yes	No	12_007		2004			12	Entered	64	Female	30SEP16	134	Placebo	>=250 mg/day	No	Yes	>=250 mg/day	No	Yes	Yes	Yes	Yes
8	ASPIRIN	81		CARDIOVASCULAR PROTECTOR		mg	qd/od	Yes	PO	Yes	No	12_007		2000			12	Entered	64	Female	30SEP16	134	Placebo	>=250 mg/day	No	Yes	>=250 mg/day	No	Yes	Yes	Yes	Yes
9	LORATADINE	10		ALLERGIC RHINITIS		mg	qd/od	Yes	PO	Yes	No	12_007		2002			12	Entered	64	Female	30SEP16	134	Placebo	>=250 mg/day	No	Yes	>=250 mg/day	No	Yes	Yes	Yes	Yes
10	DONEPEZIL	10		ALZHEIMER'S DISEASE		mg	qd/od	Yes	PO	Yes	No	12_007		2014			12	Entered	64	Female	30SEP16	134	Placebo	>=250 mg/day	No	Yes	>=250 mg/day	No	Yes	Yes	Yes	Yes
11	MEMANTINE	10		ALZHEIMER'S DISEASE		mg	qd/od	Yes	PO	Yes	No	12_007		2014			12	Entered	64	Female	30SEP16	134	Placebo	>=250 mg/day	No	Yes	>=250 mg/day	No	Yes	Yes	Yes	Yes
1	METFORMIN	1000		DIABETES MELLITUS TYPE II		mg	bid	Yes	PO	Yes	No	12_009		2011			12	Early Termination	53	Female	26OCT16	260	MF4637	>=250 mg/day	Yes	Yes	>=250 mg/day	No	Yes	Yes	Yes	Yes
2	LISINOPRIL	20		HYPERTENSION		mg	qd/od	Yes	PO	Yes	No	12_009		2013			12	Early Termination	53	Female	26OCT16	260	MF4637	>=250 mg/day	Yes	Yes	>=250 mg/day	No	Yes	Yes	Yes	Yes
3	SIMVASTATIN	20		DYSLIPIDEMIA		mg	qd/od	Yes	PO	Yes	No	12_009		2015			12	Early Termination	53	Female	26OCT16	260	MF4637	>=250 mg/day	Yes	Yes	>=250 mg/day	No	Yes	Yes	Yes	Yes
4	ZETIA	10		DYSLIPIDEMIA		mg	qd/od		PO	Yes	No	12_009		06UNK2016	18SEP16	18SEP2016	12	Early Termination	53	Female	26OCT16	260	MF4637	>=250 mg/day	Yes	Yes	>=250 mg/day	No	Yes	Yes	Yes	Yes
5	TERBINAFINE	250		ONYCHOMYCOSIS		mg	qd/od		PO	Yes	No	12_009	08AUG16	08AUG2016	10AUG16	10AUG2016	12	Early Termination	53	Female	26OCT16	260	MF4637	>=250 mg/day	Yes	Yes	>=250 mg/day	No	Yes	Yes	Yes	Yes
6	FARXIGA	5		DIABETES MELLITUS TYPE II		mg	qd/od		PO	Yes	No	12_009	14JUN16	14JUN2016		07UNK2016	12	Early Termination	53	Female	26OCT16	260	MF4637	>=250 mg/day	Yes	Yes	>=250 mg/day	No	Yes	Yes	Yes	Yes
1	CARBAMAZEPINE	200		EPILEPSY		mg	bid	Yes	PO	Yes	No	12_013		1996			12	Entered	52	Female	30SEP16	137	MF4637	>=250 mg/day	No	Yes	>=250 mg/day	No	Yes	Yes	Yes	Yes
2	HYDROCHLOROTHIAZIDE	12.5		HYPERTENSION		mg	qd/od	Yes	PO	Yes	No	12_013		2012			12	Entered	52	Female	30SEP16	137	MF4637	>=250 mg/day	No	Yes	>=250 mg/day	No	Yes	Yes	Yes	Yes
3	LISINOPRIL	30		HYPERTENSION		mg	qd/od	Yes	PO	Yes	No	12_013	24APR16	24APR2016			12	Entered	52	Female	30SEP16	137	MF4637	>=250 mg/day	No	Yes	>=250 mg/day	No	Yes	Yes	Yes	Yes
4	ROSUVASTATIN	10		DYSLIPIDEMIA		mg	qd/od	Yes	PO	Yes	No	12_013		2015			12	Entered	52	Female	30SEP16	137	MF4637	>=250 mg/day	No	Yes	>=250 mg/day	No	Yes	Yes	Yes	Yes
1	LOSARTAN	100		HYPERTENSION		mg	qd/od	Yes	PO	Yes	No	12_014		2016			12	Entered	66	Female	30SEP16	136	Placebo	>=250 mg/day	Yes	Yes	>=250 mg/day	No	Yes	Yes	Yes	Yes
2	AMLODIPINE	10		HYPERTENSION		mg	qd/od	Yes	PO	Yes	No	12_014		2006			12	Entered	66	Female	30SEP16	136	Placebo	>=250 mg/day	Yes	Yes	>=250 mg/day	No	Yes	Yes	Yes	Yes
3	SIMVASTATIN	40		DYSLIPIDEMIA		mg	qd/od	Yes	PO	Yes	No	12_014		2016			12	Entered	66	Female	30SEP16	136	Placebo	>=250 mg/day	Yes	Yes	>=250 mg/day	No	Yes	Yes	Yes	Yes
4	LEVOTHYROXINE	50		HYPOTHYROIDISM		ug	qd/od	Yes	PO	Yes	No	12_014		2010			12	Entered	66	Female	30SEP16	136	Placebo	>=250 mg/day	Yes	Yes	>=250 mg/day	No	Yes	Yes	Yes	Yes
5	ADVAIR DISKUS	250/50		BRONCHIAL ASTHMA		ug	bid	Yes	inh	Yes	No	12_014		2002			12	Entered	66	Female	30SEP16	136	Placebo	>=250 mg/day	Yes	Yes	>=250 mg/day	No	Yes	Yes	Yes	Yes
6	SINGULAIR	10		BRONCHIAL ASTHMA		mg	qd/od	Yes	PO	Yes	No	12_014		2003			12	Entered	66	Female	30SEP16	136	Placebo	>=250 mg/day	Yes	Yes	>=250 mg/day	No	Yes	Yes	Yes	Yes
7	ALBUTEROL	0.83		BRONCHIAL ASTHMA		mg	bid	Yes	inh	Yes	No	12_014		2003			12	Entered	66	Female	30SEP16	136	Placebo	>=250 mg/day	Yes	Yes	>=250 mg/day	No	Yes	Yes	Yes	Yes
8	CETIRIZINE	10		ALLERGIC RHINITIS		mg	qd/od	Yes	PO	Yes	No	12_014		2015			12	Entered	66	Female	30SEP16	136	Placebo	>=250 mg/day	Yes	Yes	>=250 mg/day	No	Yes	Yes	Yes	Yes
9	VITAMIN D	50000	WEEKLY	VITAMIN D DEFICIENCY		IU	other (specify)	Yes	PO	Yes	No	12_014	25APR16	25APR2016			12	Entered	66	Female	30SEP16	136	Placebo	>=250 mg/day	Yes	Yes	>=250 mg/day	No	Yes	Yes	Yes	Yes
10	ALENDRONATE	70	WEEKLY	OSTEOPENIA		mg	other (specify)	Yes	PO	Yes	No	12_014		2015			12	Entered	66	Female	30SEP16	136	Placebo	>=250 mg/day	Yes	Yes	>=250 mg/day	No	Yes	Yes	Yes	Yes
11	ALPRAZOLAM	0.25		ANXIETY		mg	qd/od	Yes	PO	Yes	No	12_014		2013			12	Entered	66	Female	30SEP16	136	Placebo	>=250 mg/day	Yes	Yes	>=250 mg/day	No	Yes	Yes	Yes	Yes
12	OMEPRAZOLE	40		GASTROESOPHAGEAL REFLUX DISEASE		mg	qd/od	Yes	PO	Yes	No	12_014		2015			12	Entered	66	Female	30SEP16	136	Placebo	>=250 mg/day	Yes	Yes	>=250 mg/day	No	Yes	Yes	Yes	Yes
1	ATORVASTATIN CALCIUM	40		DYSLIPIDEMIA		mg	qd/od	Yes	PO	Yes	No	12_015	01OCT15	01OCT2015			12	Early Termination	47	Female	30SEP16	135	MF4637	>=250 mg/day	Yes	Yes	>=250 mg/day	No	Yes	Yes	Yes	Yes
2	ENALAPRIL MALEATE	20		HYPERTENSION		mg	qd/od	Yes	PO	Yes	No	12_015	01JUN11	01JUN2011			12	Early Termination	47	Female	30SEP16	135	MF4637	>=250 mg/day	Yes	Yes	>=250 mg/day	No	Yes	Yes	Yes	Yes
3	METFORMIN HCL	850		DIABETES MELLITUS TYPE II		mg	bid	Yes	PO	Yes	No	12_015	01OCT15	01OCT2015			12	Early Termination	47	Female	30SEP16	135	MF4637	>=250 mg/day	Yes	Yes	>=250 mg/day	No	Yes	Yes	Yes	Yes
1	TRAMADOL	50		LUMBAR DISC DISEASE		mg	prn	Yes	PO	Yes	No	12_016		2014			12	Entered	52	Female	05OCT16	103	MF4637	<250 mg/day	No	No	<250 mg/day	No	Yes	Yes	Yes	Yes
2	VENLAFAXINE	75		DEPRESSION		mg	tid	Yes	PO	Yes	No	12_016		1999			12	Entered	52	Female	05OCT16	103	MF4637	<250 mg/day	No	No	<250 mg/day	No	Yes	Yes	Yes	Yes
3	LORAZEPAM	0.5		ANXIETY		mg	tid	Yes	PO	Yes	No	12_016		2010			12	Entered	52	Female	05OCT16	103	MF4637	<250 mg/day	No	No	<250 mg/day	No	Yes	Yes	Yes	Yes
4	TEMAZEPAM	30	H.S	INSOMNIA		mg	other (specify)	Yes	PO	Yes	No	12_016		2000			12	Entered	52	Female	05OCT16	103	MF4637	<250 mg/day	No	No	<250 mg/day	No	Yes	Yes	Yes	Yes
5	PERPHENAZINE	4	H.S	SCHIZOPHRENIA		mg	other (specify)	Yes	PO	Yes	No	12_016		1999			12	Entered	52	Female	05OCT16	103	MF4637	<250 mg/day	No	No	<250 mg/day	No	Yes	Yes	Yes	Yes
6	TRIHEXYPHENIDYL	2		PERPHENAZINE SIDE EFFECTS PREVENTION		mg	bid	Yes	PO	Yes	No	12_016		1999			12	Entered	52	Female	05OCT16	103	MF4637	<250 mg/day	No	No	<250 mg/day	No	Yes	Yes	Yes	Yes
7	SEROQUEL	400		SCHIZOPHRENIA		mg	bid	Yes	PO	Yes	No	12_016		1999			12	Entered	52	Female	05OCT16	103	MF4637	<250 mg/day	No	No	<250 mg/day	No	Yes	Yes	Yes	Yes
8	GABAPENTIN	400		IDIOPATHIC PERIPHERAL NEUROPATHY		mg	bid	Yes	PO	Yes	No	12_016		2010			12	Entered	52	Female	05OCT16	103	MF4637	<250 mg/day	No	No	<250 mg/day	No	Yes	Yes	Yes	Yes
9	ADVAIR DISKUS	250/50		ASTHMA		ug	bid		inh	Yes	No	12_016		2000		2010	12	Entered	52	Female	05OCT16	103	MF4637	<250 mg/day	No	No	<250 mg/day	No	Yes	Yes	Yes	Yes
10	SYMBICORT	160/4.5		ASTHMA		ug	bid	Yes	inh	Yes	No	12_016		2010			12	Entered	52	Female	05OCT16	103	MF4637	<250 mg/day	No	No	<250 mg/day	No	Yes	Yes	Yes	Yes
11	ALBUTEROL	90		ASTHMA		ug	prn	Yes	inh	Yes	No	12_016		2015			12	Entered	52	Female	05OCT16	103	MF4637	<250 mg/day	No	No	<250 mg/day	No	Yes	Yes	Yes	Yes
12	OMEPRAZOLE	40		GERD		mg	qd/od	Yes	PO	Yes	No	12_016		2016			12	Entered	52	Female	05OCT16	103	MF4637	<250 mg/day	No	No	<250 mg/day	No	Yes	Yes	Yes	Yes
13	VOLTAREN GEL	1		LUMBAR DISC DISEASE		g	qd/od	Yes	top	Yes	No	12_016		2015			12	Entered	52	Female	05OCT16	103	MF4637	<250 mg/day	No	No	<250 mg/day	No	Yes	Yes	Yes	Yes
14	AZITHROMYCIN	250		UPPER RESPIRATORY TRACT INFECTION	1	mg	qd/od		PO	Yes	Yes	12_016	14MAR17	14MAR2017	19MAR17	19MAR2017	12	Entered	52	Female	05OCT16	103	MF4637	<250 mg/day	No	No	<250 mg/day	No	Yes	Yes	Yes	Yes
1	METFORMIN	1000		DIABEETES MELLITUS TYPE II		mg	bid	Yes	PO	Yes	No	12_017		2013			12	Entered	57	Female	05OCT16	100	Placebo	>=250 mg/day	Yes	Yes	>=250 mg/day	No	Yes	Yes	Yes	Yes
2	LISINOPRIL	20		HYPERTENSION		mg	qd/od	Yes	PO	Yes	No	12_017		2014			12	Entered	57	Female	05OCT16	100	Placebo	>=250 mg/day	Yes	Yes	>=250 mg/day	No	Yes	Yes	Yes	Yes
3	SIMVASTATIN	20		DYSLIPIDEMIA		mg	qd/od	Yes	PO	Yes	No	12_017		2014			12	Entered	57	Female	05OCT16	100	Placebo	>=250 mg/day	Yes	Yes	>=250 mg/day	No	Yes	Yes	Yes	Yes
4	VITAMIN D	50000	WEEKLY	VITAMIN D DEFICIENCY		IU	other (specify)	Yes	PO	Yes	No	12_017		06UNK2016			12	Entered	57	Female	05OCT16	100	Placebo	>=250 mg/day	Yes	Yes	>=250 mg/day	No	Yes	Yes	Yes	Yes
5	ASPIRIN	81		PROPHYLACTIC		mg	qd/od	Yes	PO	Yes	No	12_017		08UNK2016			12	Entered	57	Female	05OCT16	100	Placebo	>=250 mg/day	Yes	Yes	>=250 mg/day	No	Yes	Yes	Yes	Yes
6	GLIPIZIDE XL	10		DIABETES MELLITUS TYPE II		mg	qd/od	Yes	PO	Yes	No	12_017		2013			12	Entered	57	Female	05OCT16	100	Placebo	>=250 mg/day	Yes	Yes	>=250 mg/day	No	Yes	Yes	Yes	Yes
1	METFORMIN	1000		DIABETES MELLITUS TYPE II		mg	bid	Yes	PO	Yes	No	12_019		2006			12	Entered	53	Male	05OCT16	102	Placebo	<250 mg/day	Yes	Yes	<250 mg/day	No	Yes	Yes	Yes	Yes
2	ONGLYZA	5		DIABETES MELLITUS TYPE II		mg	qd/od	Yes	PO	Yes	No	12_019		2006			12	Entered	53	Male	05OCT16	102	Placebo	<250 mg/day	Yes	Yes	<250 mg/day	No	Yes	Yes	Yes	Yes
3	LISINOPRIL	2.5		HYPERTENSION		mg	qd/od	Yes	PO	Yes	No	12_019		2006			12	Entered	53	Male	05OCT16	102	Placebo	<250 mg/day	Yes	Yes	<250 mg/day	No	Yes	Yes	Yes	Yes
4	METOPROLOL	50		HYPERTENSION		mg	qd/od	Yes	PO	Yes	No	12_019		2006			12	Entered	53	Male	05OCT16	102	Placebo	<250 mg/day	Yes	Yes	<250 mg/day	No	Yes	Yes	Yes	Yes
5	ATORVASTATIN	20		DYSLIPIDEMIA		mg	qd/od	Yes	PO	Yes	No	12_019		2005			12	Entered	53	Male	05OCT16	102	Placebo	<250 mg/day	Yes	Yes	<250 mg/day	No	Yes	Yes	Yes	Yes
6	OMEPRAZOLE	20		GERD		mg	qd/od	Yes	PO	Yes	No	12_019		2006			12	Entered	53	Male	05OCT16	102	Placebo	<250 mg/day	Yes	Yes	<250 mg/day	No	Yes	Yes	Yes	Yes
7	TOPIRAMATE	100		EPILEPSY		mg	tid	Yes	PO	Yes	No	12_019		2005			12	Entered	53	Male	05OCT16	102	Placebo	<250 mg/day	Yes	Yes	<250 mg/day	No	Yes	Yes	Yes	Yes
8	SERTRALINE	50		DEPRESSION		mg	qd/od	Yes	PO	Yes	No	12_019		2008			12	Entered	53	Male	05OCT16	102	Placebo	<250 mg/day	Yes	Yes	<250 mg/day	No	Yes	Yes	Yes	Yes
9	RISPERIDONE	0.375		SCHIZOPHRENIA		mg	qd/od	Yes	PO	Yes	No	12_019		2006			12	Entered	53	Male	05OCT16	102	Placebo	<250 mg/day	Yes	Yes	<250 mg/day	No	Yes	Yes	Yes	Yes
10	DICLOFENAC	75		OSTEOARTHROSIS		mg	bid	Yes	PO	Yes	No	12_019		2016			12	Entered	53	Male	05OCT16	102	Placebo	<250 mg/day	Yes	Yes	<250 mg/day	No	Yes	Yes	Yes	Yes
11	BACLOFEN	10		OSTEOARTHROSIS		mg	bid	Yes	PO	Yes	No	12_019		2016			12	Entered	53	Male	05OCT16	102	Placebo	<250 mg/day	Yes	Yes	<250 mg/day	No	Yes	Yes	Yes	Yes
1	METFORMIN	1000		DIABETES MELLITUS TYPE II		mg	bid	Yes	PO	Yes	No	12_020		2013			12	Entered	60	Female	05OCT16	101	MF4637	>=250 mg/day	Yes	Yes	>=250 mg/day	No	Yes	Yes	Yes	Yes
2	VALSARTAN	160		HYPERTENSION		mg	qd/od	Yes	PO	Yes	No	12_020		2009			12	Entered	60	Female	05OCT16	101	MF4637	>=250 mg/day	Yes	Yes	>=250 mg/day	No	Yes	Yes	Yes	Yes
3	SIMVASTATIN	40		DYSLIPIDEMIA		mg	qd/od	Yes	PO	Yes	No	12_020		2012			12	Entered	60	Female	05OCT16	101	MF4637	>=250 mg/day	Yes	Yes	>=250 mg/day	No	Yes	Yes	Yes	Yes
4	OMEPRAZOLE	40		GERD		mg	qd/od	Yes	PO	Yes	No	12_020		2012			12	Entered	60	Female	05OCT16	101	MF4637	>=250 mg/day	Yes	Yes	>=250 mg/day	No	Yes	Yes	Yes	Yes
5	ASPIRIN	81		PROPHYLACTIC		mg	qd/od	Yes	PO	Yes	No	12_020		2009			12	Entered	60	Female	05OCT16	101	MF4637	>=250 mg/day	Yes	Yes	>=250 mg/day	No	Yes	Yes	Yes	Yes
1	METFORMIN	500		DIABETES MELLITUS TYPE II		mg	bid	Yes	PO	Yes	No	12_021	04SEP15	04SEP2015			12	Entered	54	Male	11OCT16	254	MF4637	>=250 mg/day	Yes	Yes	>=250 mg/day	No	Yes	Yes	Yes	Yes
2	LISINOPRIL	20		HYPERTENSION		mg	qd/od	Yes	PO	Yes	No	12_021	04SEP15	04SEP2015			12	Entered	54	Male	11OCT16	254	MF4637	>=250 mg/day	Yes	Yes	>=250 mg/day	No	Yes	Yes	Yes	Yes
3	SIMVASTATIN	20		DYSLIPIDEMIA		mg	qd/od	Yes	PO	Yes	No	12_021	04SEP15	04SEP2015			12	Entered	54	Male	11OCT16	254	MF4637	>=250 mg/day	Yes	Yes	>=250 mg/day	No	Yes	Yes	Yes	Yes
4	PANTOPRAZOLE	40		GERD		mg	qd/od	Yes	PO	Yes	No	12_021	04SEP15	04SEP2015			12	Entered	54	Male	11OCT16	254	MF4637	>=250 mg/day	Yes	Yes	>=250 mg/day	No	Yes	Yes	Yes	Yes
5	FLUTICASONE	50		ALLERGIC RHINITIS		ug	qd/od	Yes	inh	Yes	No	12_021	10NOV15	10NOV2015			12	Entered	54	Male	11OCT16	254	MF4637	>=250 mg/day	Yes	Yes	>=250 mg/day	No	Yes	Yes	Yes	Yes
1	METFORMIN	500		DIABETES MELLITUS TYPE II		mg	bid	Yes	PO	Yes	No	12_022	19SEP16	19SEP2016			12	Entered	43	Male	12OCT16	253	Placebo	<250 mg/day	Yes	No	<250 mg/day	No	Yes	Yes	Yes	Yes
2	ENALAPRIL	20		HYPERTENSION		mg	qd/od	Yes	PO	Yes	No	12_022		2014			12	Entered	43	Male	12OCT16	253	Placebo	<250 mg/day	Yes	No	<250 mg/day	No	Yes	Yes	Yes	Yes
3	BACLOFEN	10		CERVICAL SPONDILOSIS		mg	qd/od	Yes	PO	Yes	No	12_022	19SEP16	19SEP2016			12	Entered	43	Male	12OCT16	253	Placebo	<250 mg/day	Yes	No	<250 mg/day	No	Yes	Yes	Yes	Yes
4	HYDROCHLOROTHIAZIDE	25		HYPERTENSION		mg	qd/od	Yes	PO	Yes	No	12_022	15AUG16	15AUG2016			12	Entered	43	Male	12OCT16	253	Placebo	<250 mg/day	Yes	No	<250 mg/day	No	Yes	Yes	Yes	Yes
1	METFORMIN	500		DIABETES MELLITUS TYPE II		mg	tid	Yes	PO	Yes	No	12_024		2014			12	Early Termination	41	Female	11OCT16	139	MF4637	>=250 mg/day	Yes	No	>=250 mg/day	No	Yes	Yes	Yes	Yes
2	OMEPRAZOLE	40		GERD		mg	qd/od	Yes	PO	Yes	No	12_024	14JUN16	14JUN2016			12	Early Termination	41	Female	11OCT16	139	MF4637	>=250 mg/day	Yes	No	>=250 mg/day	No	Yes	Yes	Yes	Yes
3	ESCITALOPRAM	5		DEPRESSION		mg	qd/od	Yes	PO	Yes	No	12_024	17MAY16	17MAY2016			12	Early Termination	41	Female	11OCT16	139	MF4637	>=250 mg/day	Yes	No	>=250 mg/day	No	Yes	Yes	Yes	Yes
1	GABAPENTIN	300		DIABETIC NEUROPATHY		mg	tid	Yes	PO	Yes	No	12_025	18NOV14	18NOV2014			12	Entered	73	Male	14OCT16	258	MF4637	>=250 mg/day	Yes	No	>=250 mg/day	No	Yes	Yes	Yes	Yes
2	METOPROLOL SUCCINATE	100		HYPERTENSION		mg	qd/od	Yes	PO	Yes	No	12_025	12NOV15	12NOV2015			12	Entered	73	Male	14OCT16	258	MF4637	>=250 mg/day	Yes	No	>=250 mg/day	No	Yes	Yes	Yes	Yes
3	HYDROCHLOROTHIAZIDE	12.5		HYPERTENSION		mg	qd/od	Yes	PO	Yes	No	12_025	29MAR16	29MAR2016			12	Entered	73	Male	14OCT16	258	MF4637	>=250 mg/day	Yes	No	>=250 mg/day	No	Yes	Yes	Yes	Yes
4	TYLENOL EXTRA STRENGTH	500		ARTHRITIS PAIN		mg	prn	Yes	PO	Yes	No	12_025	17OCT15	17OCT2015			12	Entered	73	Male	14OCT16	258	MF4637	>=250 mg/day	Yes	No	>=250 mg/day	No	Yes	Yes	Yes	Yes
5	TAMSULOSIN	0.4		BENIGN PROSTATIC HYPERPLASIA		mg	qd/od	Yes	PO	Yes	No	12_025	02MAR16	02MAR2016			12	Entered	73	Male	14OCT16	258	MF4637	>=250 mg/day	Yes	No	>=250 mg/day	No	Yes	Yes	Yes	Yes
6	AMLODIPINE	5		HYPERTENSION		mg	qd/od	Yes	PO	Yes	No	12_025	02MAR16	02MAR2016			12	Entered	73	Male	14OCT16	258	MF4637	>=250 mg/day	Yes	No	>=250 mg/day	No	Yes	Yes	Yes	Yes
7	LISINOPRIL	2.5		HYPERTENSION		mg	qd/od	Yes	PO	Yes	No	12_025	02MAR16	02MAR2016			12	Entered	73	Male	14OCT16	258	MF4637	>=250 mg/day	Yes	No	>=250 mg/day	No	Yes	Yes	Yes	Yes
8	GLIMEPIRIDE	4		DIABETES MELLITUS TYPE II		mg	bid	Yes	PO	Yes	No	12_025	02MAR16	02MAR2016			12	Entered	73	Male	14OCT16	258	MF4637	>=250 mg/day	Yes	No	>=250 mg/day	No	Yes	Yes	Yes	Yes
9	NOVOLOG MIX 70/30	50		DIABETES MELLITUS TYPE II		IU	bid	Yes	SC	Yes	No	12_025	18FEB16	18FEB2016			12	Entered	73	Male	14OCT16	258	MF4637	>=250 mg/day	Yes	No	>=250 mg/day	No	Yes	Yes	Yes	Yes
10	LORATADINE	10		ALLERGIC RHINITIS		mg	qd/od	Yes	PO	Yes	No	12_025	08MAY15	08MAY2015			12	Entered	73	Male	14OCT16	258	MF4637	>=250 mg/day	Yes	No	>=250 mg/day	No	Yes	Yes	Yes	Yes
11	VITAMIN D	50000	WEEKLY	SUPPLEMENTAL		IU	other (specify)	Yes	PO	Yes	No	12_025		2014			12	Entered	73	Male	14OCT16	258	MF4637	>=250 mg/day	Yes	No	>=250 mg/day	No	Yes	Yes	Yes	Yes
12	BENADRIL	20		INSOMNIA		mg	prn	Yes	PO	Yes	No	12_025		2014			12	Entered	73	Male	14OCT16	258	MF4637	>=250 mg/day	Yes	No	>=250 mg/day	No	Yes	Yes	Yes	Yes
13	MUSCLE RUBS	1		MUSCLE PAIN		g	prn	Yes	top	Yes	No	12_025		2010			12	Entered	73	Male	14OCT16	258	MF4637	>=250 mg/day	Yes	No	>=250 mg/day	No	Yes	Yes	Yes	Yes
1	LOSARTAN/HCTZ	100/12.5		HYPERTENSION		mg	qd/od	Yes	PO	Yes	No	12_027		2016			12	Entered	56	Female	12OCT16	252	Placebo	<250 mg/day	No	Yes	<250 mg/day	No	Yes	Yes	Yes	Yes
2	AMLODIPINE	10		HYPERTENSION		mg	qd/od	Yes	PO	Yes	No	12_027		2014			12	Entered	56	Female	12OCT16	252	Placebo	<250 mg/day	No	Yes	<250 mg/day	No	Yes	Yes	Yes	Yes
3	SIMVASTATIN	10		DYSLIPIDEMIA		mg	qd/od	Yes	PO	Yes	No	12_027		2014			12	Entered	56	Female	12OCT16	252	Placebo	<250 mg/day	No	Yes	<250 mg/day	No	Yes	Yes	Yes	Yes
4	BACLOFEN	10		CHRONIC LOW BACK PAIN		mg	qd/od	Yes	PO	Yes	No	12_027		2016			12	Entered	56	Female	12OCT16	252	Placebo	<250 mg/day	No	Yes	<250 mg/day	No	Yes	Yes	Yes	Yes
5	MELOXICAM	7.5		CHRONIC LOW BACK PAIN		mg	qd/od	Yes	PO	Yes	No	12_027		2016			12	Entered	56	Female	12OCT16	252	Placebo	<250 mg/day	No	Yes	<250 mg/day	No	Yes	Yes	Yes	Yes
6	TEMAZEPAM	15		INSOMNIA		mg	qd/od	Yes	PO	Yes	No	12_027		2016			12	Entered	56	Female	12OCT16	252	Placebo	<250 mg/day	No	Yes	<250 mg/day	No	Yes	Yes	Yes	Yes
7	FLUTICASONE	50		ALLERGIC RHINITIS		ug	bid	Yes	inh	Yes	No	12_027	20JUN16	20JUN2016			12	Entered	56	Female	12OCT16	252	Placebo	<250 mg/day	No	Yes	<250 mg/day	No	Yes	Yes	Yes	Yes
8	VITAMIN D	50000	WEEKLY	VITAMIN D DEFICIENCY		IU	other (specify)	Yes	PO	Yes	No	12_027	28SEP16	28SEP2016			12	Entered	56	Female	12OCT16	252	Placebo	<250 mg/day	No	Yes	<250 mg/day	No	Yes	Yes	Yes	Yes
9	AMMONIUM LACTATE 12%	1		DRY SKIN		g	bid	Yes	top	Yes	No	12_027	01AUG16	01AUG2016			12	Entered	56	Female	12OCT16	252	Placebo	<250 mg/day	No	Yes	<250 mg/day	No	Yes	Yes	Yes	Yes
10	CYCLOBENZAPRINE	5		CHRONIC LOW BACK PAIN		mg	qd/od		PO	Yes	No	12_027	27MAY16	27MAY2016	27AUG16	27AUG2016	12	Entered	56	Female	12OCT16	252	Placebo	<250 mg/day	No	Yes	<250 mg/day	No	Yes	Yes	Yes	Yes
1	FLUTICASONE	100		RHINITIS		ug	qd/od	Yes	IN	Yes	No	12_028		2015			12	Entered	71	Female	14OCT16	259	Placebo	<250 mg/day	Yes	Yes	<250 mg/day	No	Yes	Yes	Yes	Yes
2	LIDOCAINE 5%	0.5		OSTEOARTHRITIS		g	bid	Yes	top	Yes	No	12_028		01UNK2016			12	Entered	71	Female	14OCT16	259	Placebo	<250 mg/day	Yes	Yes	<250 mg/day	No	Yes	Yes	Yes	Yes
3	LYRICA	75		DIABETIC NEUROPATHY		mg	tid	Yes	PO	Yes	No	12_028		2014			12	Entered	71	Female	14OCT16	259	Placebo	<250 mg/day	Yes	Yes	<250 mg/day	No	Yes	Yes	Yes	Yes
4	LATANOPROST SOLUTION 0.005%	2		GLAUCOMA		mL	qd/od	Yes	eye	Yes	No	12_028		2015			12	Entered	71	Female	14OCT16	259	Placebo	<250 mg/day	Yes	Yes	<250 mg/day	No	Yes	Yes	Yes	Yes
5	DONEPEZIL HCL	10		MEMORY LOSS		mg	qd/od	Yes	PO	Yes	No	12_028		2014			12	Entered	71	Female	14OCT16	259	Placebo	<250 mg/day	Yes	Yes	<250 mg/day	No	Yes	Yes	Yes	Yes
6	ASPIRIN	81		CARDIOVASCULAR PROTECTOR		mg	qd/od	Yes	PO	Yes	No	12_028		2010			12	Entered	71	Female	14OCT16	259	Placebo	<250 mg/day	Yes	Yes	<250 mg/day	No	Yes	Yes	Yes	Yes
7	VALSARTAN	320		HYPERTENSION		mg	qd/od	Yes	PO	Yes	No	12_028		01UNK2016			12	Entered	71	Female	14OCT16	259	Placebo	<250 mg/day	Yes	Yes	<250 mg/day	No	Yes	Yes	Yes	Yes
8	METFORMIN	1000		DIABETES MELLITUS TYPE II		mg	bid	Yes	PO	Yes	No	12_028		2014			12	Entered	71	Female	14OCT16	259	Placebo	<250 mg/day	Yes	Yes	<250 mg/day	No	Yes	Yes	Yes	Yes
9	CRESTOR	40		DYSLIPIDEMIA		mg	qd/od	Yes	PO	Yes	No	12_028		2014			12	Entered	71	Female	14OCT16	259	Placebo	<250 mg/day	Yes	Yes	<250 mg/day	No	Yes	Yes	Yes	Yes
10	SYMBICORT	160/4.5		ASTHMA		ug	bid	Yes	inh	Yes	No	12_028		2014			12	Entered	71	Female	14OCT16	259	Placebo	<250 mg/day	Yes	Yes	<250 mg/day	No	Yes	Yes	Yes	Yes
11	ALBUTEROL SULFATE 0.083%	3		ASTHMA		mL	prn	Yes	inh	Yes	No	12_028		2010			12	Entered	71	Female	14OCT16	259	Placebo	<250 mg/day	Yes	Yes	<250 mg/day	No	Yes	Yes	Yes	Yes
12	LANTUS	10		DIABETES MELLITUS TYPE II		IU	qd/od	Yes	SC	Yes	No	12_028		09UNK2016			12	Entered	71	Female	14OCT16	259	Placebo	<250 mg/day	Yes	Yes	<250 mg/day	No	Yes	Yes	Yes	Yes
13	ZOLPIDEM	5		INSOMNIA		mg	qd/od	Yes	PO	Yes	No	12_028		2015			12	Entered	71	Female	14OCT16	259	Placebo	<250 mg/day	Yes	Yes	<250 mg/day	No	Yes	Yes	Yes	Yes
14	CLONAZEPAM	1		ANXIETY		mg	qd/od	Yes	PO	Yes	No	12_028		2015			12	Entered	71	Female	14OCT16	259	Placebo	<250 mg/day	Yes	Yes	<250 mg/day	No	Yes	Yes	Yes	Yes
15	MIRTAZAPINE	30		DEPRESSION		mg	qd/od	Yes	PO	Yes	No	12_028		2015			12	Entered	71	Female	14OCT16	259	Placebo	<250 mg/day	Yes	Yes	<250 mg/day	No	Yes	Yes	Yes	Yes
16	SERTRALINE	50		DEPRESSION		mg	qd/od	Yes	PO	Yes	No	12_028		2015			12	Entered	71	Female	14OCT16	259	Placebo	<250 mg/day	Yes	Yes	<250 mg/day	No	Yes	Yes	Yes	Yes
17	CLOBETASOL	1		BILATERAL FEET DERMATITIS		g	bid	Yes	top	Yes	No	12_028		2016			12	Entered	71	Female	14OCT16	259	Placebo	<250 mg/day	Yes	Yes	<250 mg/day	No	Yes	Yes	Yes	Yes
18	COMBIVENT	20/100		ASTHMA		ug	qd/od	Yes	inh	Yes	No	12_028		2015			12	Entered	71	Female	14OCT16	259	Placebo	<250 mg/day	Yes	Yes	<250 mg/day	No	Yes	Yes	Yes	Yes
1	METFORMIN	850		DIABETES MELLITUS TYPE II		mg	bid	Yes	PO	Yes	No	12_029		2008			12	Entered	72	Male	12OCT16	256	Placebo	>=250 mg/day	Yes	Yes	>=250 mg/day	No	Yes	Yes	Yes	Yes
2	GLIPIZIDE	5		DIABETES MELLITUS TYPE II		mg	bid	Yes	PO	Yes	No	12_029	22SEP16	22SEP2016			12	Entered	72	Male	12OCT16	256	Placebo	>=250 mg/day	Yes	Yes	>=250 mg/day	No	Yes	Yes	Yes	Yes
3	LISINOPRIL	2.5		HYPERTENSION		mg	qd/od	Yes	PO	Yes	No	12_029		2008			12	Entered	72	Male	12OCT16	256	Placebo	>=250 mg/day	Yes	Yes	>=250 mg/day	No	Yes	Yes	Yes	Yes
4	ATORVASTATIN	20		DYSLIPIDEMIA		mg	qd/od	Yes	PO	Yes	No	12_029		2014			12	Entered	72	Male	12OCT16	256	Placebo	>=250 mg/day	Yes	Yes	>=250 mg/day	No	Yes	Yes	Yes	Yes
5	ASPIRIN	81		PROPHYLACTIC		mg	qd/od	Yes	PO	Yes	No	12_029		2010			12	Entered	72	Male	12OCT16	256	Placebo	>=250 mg/day	Yes	Yes	>=250 mg/day	No	Yes	Yes	Yes	Yes
6	CIALIS	5		BENIGN PROSTATIC HYPERTROPHY		mg	qd/od	Yes	PO	Yes	No	12_029		2013			12	Entered	72	Male	12OCT16	256	Placebo	>=250 mg/day	Yes	Yes	>=250 mg/day	No	Yes	Yes	Yes	Yes
1	METFORMIN	500		DIABETES MELLITUS TYPE II		mg	bid	Yes	PO	Yes	No	12_030		04UNK2016			12	Entered	56	Male	12OCT16	255	MF4637	<250 mg/day	Yes	Yes	<250 mg/day	No	Yes	Yes	Yes	Yes
2	ATORVASTATIN	40		DYSLIPIDEMIA		mg	qd/od	Yes	PO	Yes	No	12_030		04UNK2016			12	Entered	56	Male	12OCT16	255	MF4637	<250 mg/day	Yes	Yes	<250 mg/day	No	Yes	Yes	Yes	Yes
3	ASPIRIN	81		CARDIOVASCULAR PROTECTOR		mg	qd/od	Yes	PO	Yes	No	12_030		2014			12	Entered	56	Male	12OCT16	255	MF4637	<250 mg/day	Yes	Yes	<250 mg/day	No	Yes	Yes	Yes	Yes
4	DUTASTERIDE	0.5		BENIGN PROSTATIC HYPERPLASIA		mg	qd/od	Yes	PO	Yes	No	12_030		07UNK2016			12	Entered	56	Male	12OCT16	255	MF4637	<250 mg/day	Yes	Yes	<250 mg/day	No	Yes	Yes	Yes	Yes
5	SERTRALINE	25		DEPRESSION		mg	qd/od	Yes	PO	Yes	No	12_030		04UNK2016			12	Entered	56	Male	12OCT16	255	MF4637	<250 mg/day	Yes	Yes	<250 mg/day	No	Yes	Yes	Yes	Yes
1	METFORMIN	1000		DIABETES MELLITUS TYPE II		mg	bid	Yes	PO	Yes	No	12_032		2008			12	Entered	67	Male	02NOV16	280	Placebo	>=250 mg/day	Yes	No	>=250 mg/day	No	Yes	Yes	Yes	Yes
2	GLYBURIDE	5		DIABETES MELLITUS TYPE II		mg	qd/od	Yes	PO	Yes	No	12_032		2013			12	Entered	67	Male	02NOV16	280	Placebo	>=250 mg/day	Yes	No	>=250 mg/day	No	Yes	Yes	Yes	Yes
3	GLIPIZIDE	10		DIABETES MELLITUS TYPE II		mg	bid	Yes	PO	Yes	No	12_032		2015			12	Entered	67	Male	02NOV16	280	Placebo	>=250 mg/day	Yes	No	>=250 mg/day	No	Yes	Yes	Yes	Yes
4	METOPROLOL	100		HYPERTENSION		mg	bid	Yes	PO	Yes	No	12_032		2007			12	Entered	67	Male	02NOV16	280	Placebo	>=250 mg/day	Yes	No	>=250 mg/day	No	Yes	Yes	Yes	Yes
5	GABAPENTIN	300		PERIPHERAL NEUROPATHY		mg	bid	Yes	PO	Yes	No	12_032		2011			12	Entered	67	Male	02NOV16	280	Placebo	>=250 mg/day	Yes	No	>=250 mg/day	No	Yes	Yes	Yes	Yes
6	OMEGA 3	1000		DYSLIPIDEMIA		mg	qd/od		PO	No	No	12_032		2015		08UNK2016	12	Entered	67	Male	02NOV16	280	Placebo	>=250 mg/day	Yes	No	>=250 mg/day	No	Yes	Yes	Yes	Yes
1	LISINOPRIL	20		HYPERTENSION		mg	qd/od	Yes	PO	Yes	No	12_033		2014			12	Entered	72	Female	02NOV16	282	MF4637	>=250 mg/day	Yes	No	>=250 mg/day	No	Yes	Yes	Yes	Yes
2	METFORMIN	500		DIABETES MELLITUS TYPE II		mg	tid	Yes	PO	Yes	No	12_033		2016			12	Entered	72	Female	02NOV16	282	MF4637	>=250 mg/day	Yes	No	>=250 mg/day	No	Yes	Yes	Yes	Yes
3	ANUSOL HC	25		HEMORRHOIDS		ug	bid	Yes	rec	Yes	No	12_033	26JUL16	26JUL2016			12	Entered	72	Female	02NOV16	282	MF4637	>=250 mg/day	Yes	No	>=250 mg/day	No	Yes	Yes	Yes	Yes
4	OMEPRAZOLE DR	20		GERD		mg	qd/od	Yes	PO	Yes	No	12_033	26JUL16	26JUL2016			12	Entered	72	Female	02NOV16	282	MF4637	>=250 mg/day	Yes	No	>=250 mg/day	No	Yes	Yes	Yes	Yes
5	VOLTAREN/DICLOFENAC	2		BACK PAIN		g	qid	Yes	top	Yes	No	12_033	26JUL16	26JUL2016			12	Entered	72	Female	02NOV16	282	MF4637	>=250 mg/day	Yes	No	>=250 mg/day	No	Yes	Yes	Yes	Yes
1	REPAGLINIDE	2		DIABETES MELLITUS TYPE II		mg	qd/od	Yes	PO	Yes	No	12_034		2006			12	Entered	55	Female	26OCT16	261	Placebo	>=250 mg/day	Yes	No	>=250 mg/day	No	Yes	Yes	Yes	No
2	CAPTOPRIL	25		HYPERTENSION		mg	qd/od	Yes	PO	Yes	No	12_034		1992			12	Entered	55	Female	26OCT16	261	Placebo	>=250 mg/day	Yes	No	>=250 mg/day	No	Yes	Yes	Yes	No
3	ASPIRIN	81		CARDIOPROTECTOR		mg	qd/od	Yes	PO	Yes	No	12_034		2008			12	Entered	55	Female	26OCT16	261	Placebo	>=250 mg/day	Yes	No	>=250 mg/day	No	Yes	Yes	Yes	No
1	METFORMIN	1000		DIABETES MELLITUS TYPE II		mg	bid	Yes	PO	Yes	No	12_038		2004			12	Entered	62	Male	26OCT16	263	Placebo	>=250 mg/day	Yes	Yes	>=250 mg/day	No	Yes	Yes	Yes	Yes
2	NIFEDIPINE ER	90		HYPERTENSION		mg	qd/od	Yes	PO	Yes	No	12_038		2004			12	Entered	62	Male	26OCT16	263	Placebo	>=250 mg/day	Yes	Yes	>=250 mg/day	No	Yes	Yes	Yes	Yes
3	ATORVASTATIN	20		DYSLIPIDEMIA		mg	qd/od	Yes	PO	Yes	No	12_038		2010			12	Entered	62	Male	26OCT16	263	Placebo	>=250 mg/day	Yes	Yes	>=250 mg/day	No	Yes	Yes	Yes	Yes
4	LABETALOL	100		HYPERTENSION		mg	qd/od	Yes	PO	Yes	No	12_038		07UNK2016			12	Entered	62	Male	26OCT16	263	Placebo	>=250 mg/day	Yes	Yes	>=250 mg/day	No	Yes	Yes	Yes	Yes
5	ASPIRIN	81		CARDIOVASCULAR PROTECTOR		mg	qd/od	Yes	PO	Yes	No	12_038		2002			12	Entered	62	Male	26OCT16	263	Placebo	>=250 mg/day	Yes	Yes	>=250 mg/day	No	Yes	Yes	Yes	Yes
6	CLONIDINE	0.2		HYPERTENSION		mg	tid	Yes	PO	Yes	No	12_038	30SEP16	30SEP2016			12	Entered	62	Male	26OCT16	263	Placebo	>=250 mg/day	Yes	Yes	>=250 mg/day	No	Yes	Yes	Yes	Yes
7	BENICAR	40		HYPERTENSION		mg	qd/od	Yes	PO	Yes	No	12_038		2010			12	Entered	62	Male	26OCT16	263	Placebo	>=250 mg/day	Yes	Yes	>=250 mg/day	No	Yes	Yes	Yes	Yes
8	JANUVIA	100		DIABETES MELLITUS TYPE II		g	qd/od	Yes	PO	Yes	No	12_038		2015			12	Entered	62	Male	26OCT16	263	Placebo	>=250 mg/day	Yes	Yes	>=250 mg/day	No	Yes	Yes	Yes	Yes
9	NOVOLIN INSULIN 70/30	350		DIABETES MELLITUS TYPE II		IU	bid	Yes	SC	Yes	No	12_038	19SEP16	19SEP2016			12	Entered	62	Male	26OCT16	263	Placebo	>=250 mg/day	Yes	Yes	>=250 mg/day	No	Yes	Yes	Yes	Yes
10	LEVEMIR	80	Q.H.S	DIABETES MELLITUS TYPE II		IU	other (specify)		SC	Yes	No	12_038		2015		04UNK2016	12	Entered	62	Male	26OCT16	263	Placebo	>=250 mg/day	Yes	Yes	>=250 mg/day	No	Yes	Yes	Yes	Yes
11	AMOXICILLIN-CLAVULANATE	875		ACUTE CHOLECYSTITIS		mg	bid		PO	Yes	No	12_038	12OCT16	12OCT2016	24OCT16	24OCT2016	12	Entered	62	Male	26OCT16	263	Placebo	>=250 mg/day	Yes	Yes	>=250 mg/day	No	Yes	Yes	Yes	Yes
12	GABAPENTIN	300		DIABETIC NEUROPATHY		mg	bid		PO	Yes	No	12_038	19JUL16	19JUL2016	19AUG16	19AUG2016	12	Entered	62	Male	26OCT16	263	Placebo	>=250 mg/day	Yes	Yes	>=250 mg/day	No	Yes	Yes	Yes	Yes
13	METOPROLOL	100		HYPERTENSION		mg	qd/od		PO	Yes	No	12_038	29AUG15	29AUG2015	18JUL16	18JUL2016	12	Entered	62	Male	26OCT16	263	Placebo	>=250 mg/day	Yes	Yes	>=250 mg/day	No	Yes	Yes	Yes	Yes
14	OMEGA 3	1		DYSLIPIDEMIA		g	bid		PO	Yes	No	12_038	10FEB15	10FEB2015		05UNK2015	12	Entered	62	Male	26OCT16	263	Placebo	>=250 mg/day	Yes	Yes	>=250 mg/day	No	Yes	Yes	Yes	Yes
15	OMEPRAZOLE	40		GERD		mg	qd/od		PO	Yes	No	12_038	27NOV15	27NOV2015		04UNK2016	12	Entered	62	Male	26OCT16	263	Placebo	>=250 mg/day	Yes	Yes	>=250 mg/day	No	Yes	Yes	Yes	Yes
1	MELOXICAM	15		RIGHT SHOULDER PAIN		mg	qd/od	Yes	PO	Yes	No	12_039		07UNK2016			12	Entered	57	Male	26OCT16	262	MF4637	<250 mg/day	No	No	<250 mg/day	No	Yes	Yes	Yes	Yes
2	ALPRAZOLAM	1		ANXIETY		mg	qd/od	Yes	PO	Yes	No	12_039		2014			12	Entered	57	Male	26OCT16	262	MF4637	<250 mg/day	No	No	<250 mg/day	No	Yes	Yes	Yes	Yes
3	NAPROXEN	500		RIGHT SHOULDER PAIN		mg	prn	Yes	PO	Yes	No	12_039		2016			12	Entered	57	Male	26OCT16	262	MF4637	<250 mg/day	No	No	<250 mg/day	No	Yes	Yes	Yes	Yes
4	ECOTRIN	81		CARDIOVASCULAR PROTECTOR		mg	qd/od	Yes	PO	Yes	No	12_039		2010			12	Entered	57	Male	26OCT16	262	MF4637	<250 mg/day	No	No	<250 mg/day	No	Yes	Yes	Yes	Yes
1	METFORMIN	850		DIABETES MELLITUS TYPE II		mg	bid	Yes	PO	Yes	No	12_040		2008			12	Entered	60	Female	10NOV16	292	MF4637	>=250 mg/day	Yes	Yes	>=250 mg/day	No	Yes	Yes	Yes	Yes
2	ENALAPRIL	5		HYPERTENSION		mg	qd/od	Yes	PO	Yes	No	12_040		2009			12	Entered	60	Female	10NOV16	292	MF4637	>=250 mg/day	Yes	Yes	>=250 mg/day	No	Yes	Yes	Yes	Yes
3	ATORVASTATIN	40		DYSLIPIDEMIA		mg	qd/od	Yes	PO	Yes	No	12_040		JUL2016			12	Entered	60	Female	10NOV16	292	MF4637	>=250 mg/day	Yes	Yes	>=250 mg/day	No	Yes	Yes	Yes	Yes
4	SYMBICORT	160/4.5		COPD		ug	qd/od	Yes	inh	Yes	No	12_040		2016			12	Entered	60	Female	10NOV16	292	MF4637	>=250 mg/day	Yes	Yes	>=250 mg/day	No	Yes	Yes	Yes	Yes
5	VOLTAREN GEL 1%	1		OSTEOARTHRITIS		g	qd/od	Yes	top	Yes	No	12_040		2015			12	Entered	60	Female	10NOV16	292	MF4637	>=250 mg/day	Yes	Yes	>=250 mg/day	No	Yes	Yes	Yes	Yes
6	MELOXICAM	15		OSTEOARTHRITIS		mg	qd/od	Yes	PO	Yes	No	12_040		2010			12	Entered	60	Female	10NOV16	292	MF4637	>=250 mg/day	Yes	Yes	>=250 mg/day	No	Yes	Yes	Yes	Yes
7	RANITIDINE	150		GERD		mg	qd/od	Yes	PO	Yes	No	12_040		2006			12	Entered	60	Female	10NOV16	292	MF4637	>=250 mg/day	Yes	Yes	>=250 mg/day	No	Yes	Yes	Yes	Yes
8	OXYBUTYNIN	5		URINARY INCONTINENCE		mg	qd/od	Yes	PO	Yes	No	12_040		2011			12	Entered	60	Female	10NOV16	292	MF4637	>=250 mg/day	Yes	Yes	>=250 mg/day	No	Yes	Yes	Yes	Yes
9	FLUTICASONE	50		ALLERGIC RHINITIS		ug	qd/od	Yes	IN	Yes	No	12_040		2013			12	Entered	60	Female	10NOV16	292	MF4637	>=250 mg/day	Yes	Yes	>=250 mg/day	No	Yes	Yes	Yes	Yes
10	GABAPENTIN	300		DIABETIC NEUROPATHY		mg	bid	Yes	PO	Yes	No	12_040		2010			12	Entered	60	Female	10NOV16	292	MF4637	>=250 mg/day	Yes	Yes	>=250 mg/day	No	Yes	Yes	Yes	Yes
11	BUPROPION	150		DEPRESSION		mg	qd/od	Yes	PO	Yes	No	12_040		2010			12	Entered	60	Female	10NOV16	292	MF4637	>=250 mg/day	Yes	Yes	>=250 mg/day	No	Yes	Yes	Yes	Yes
12	SEROQUEL	300		DEPRESSION		mg	qd/od	Yes	PO	Yes	No	12_040		2013			12	Entered	60	Female	10NOV16	292	MF4637	>=250 mg/day	Yes	Yes	>=250 mg/day	No	Yes	Yes	Yes	Yes
13	TRAZODONE	50		ANXIETY		mg	qd/od	Yes	PO	Yes	No	12_040	07OCT16	07OCT2016			12	Entered	60	Female	10NOV16	292	MF4637	>=250 mg/day	Yes	Yes	>=250 mg/day	No	Yes	Yes	Yes	Yes
14	ESZOPICLONE	2		INSOMNIA		mg	qd/od	Yes	PO	Yes	No	12_040		2010			12	Entered	60	Female	10NOV16	292	MF4637	>=250 mg/day	Yes	Yes	>=250 mg/day	No	Yes	Yes	Yes	Yes
15	TEMAZEPAM	30		INSOMNIA		mg	qd/od		PO	No	No	12_040		FEB2016		JUL2016	12	Entered	60	Female	10NOV16	292	MF4637	>=250 mg/day	Yes	Yes	>=250 mg/day	No	Yes	Yes	Yes	Yes
16	RESTASIS 0.05%	1		DRY EYE SYNDROME		g	qd/od	Yes	eye	Yes	No	12_040		2016			12	Entered	60	Female	10NOV16	292	MF4637	>=250 mg/day	Yes	Yes	>=250 mg/day	No	Yes	Yes	Yes	Yes
17	MONTELUKAST	10		ALLERGIC RHINITIS		mg	qd/od	Yes	PO	Yes	No	12_040		2010			12	Entered	60	Female	10NOV16	292	MF4637	>=250 mg/day	Yes	Yes	>=250 mg/day	No	Yes	Yes	Yes	Yes
18	ASPIRIN	81		PROPHYLACTIC		mg	qd/od	Yes	PO	Yes	No	12_040		2010			12	Entered	60	Female	10NOV16	292	MF4637	>=250 mg/day	Yes	Yes	>=250 mg/day	No	Yes	Yes	Yes	Yes
19	LINZESS	145		CHRONIC IDIOPATHIC CONSTIPATION		ug	qd/od		PO	No	No	12_040		2013		AUG2016	12	Entered	60	Female	10NOV16	292	MF4637	>=250 mg/day	Yes	Yes	>=250 mg/day	No	Yes	Yes	Yes	Yes
20	FLUOXETINE	20		DEPRESSION		mg	qd/od	Yes	PO	Yes	No	12_040		2016			12	Entered	60	Female	10NOV16	292	MF4637	>=250 mg/day	Yes	Yes	>=250 mg/day	No	Yes	Yes	Yes	Yes
21	PATADAY 2%	1		ALLERGIC CONJUNCTIVITIS		g	bid		eye	No	No	12_040	20SEP16	20SEP2016	05OCT16	05OCT2016	12	Entered	60	Female	10NOV16	292	MF4637	>=250 mg/day	Yes	Yes	>=250 mg/day	No	Yes	Yes	Yes	Yes
22	REXULTI	2		DEPRESSION		mg	qd/od	Yes	PO	Yes	No	12_040	07OCT16	07OCT2016			12	Entered	60	Female	10NOV16	292	MF4637	>=250 mg/day	Yes	Yes	>=250 mg/day	No	Yes	Yes	Yes	Yes
23	SIMVASTATIN	20		DYSLIPIDEMIA		mg	qd/od		PO	No	No	12_040	01DEC14	01DEC2014		JUN2016	12	Entered	60	Female	10NOV16	292	MF4637	>=250 mg/day	Yes	Yes	>=250 mg/day	No	Yes	Yes	Yes	Yes
24	OMEGA 3	4		DYSLIPIDEMIA		g	qd/od		PO	No	No	12_040	01DEC14	01DEC2014		MAR2016	12	Entered	60	Female	10NOV16	292	MF4637	>=250 mg/day	Yes	Yes	>=250 mg/day	No	Yes	Yes	Yes	Yes
1	METFORMIN	500		DIABETES MELLITUS TYPE II		mg	bid	Yes	PO	Yes	No	12_041		2014			12	Early Termination	54	Female	10NOV16	293	Placebo	>=250 mg/day	Yes	Yes	>=250 mg/day	No	Yes	Yes	Yes	Yes
2	LISINOPRIL	5		HYPERTENSION		mg	qd/od	Yes	PO	Yes	No	12_041		2000			12	Early Termination	54	Female	10NOV16	293	Placebo	>=250 mg/day	Yes	Yes	>=250 mg/day	No	Yes	Yes	Yes	Yes
3	ATENOLOL	25		HYPERTENSION		mg	qd/od	Yes	PO	Yes	No	12_041		2000			12	Early Termination	54	Female	10NOV16	293	Placebo	>=250 mg/day	Yes	Yes	>=250 mg/day	No	Yes	Yes	Yes	Yes
4	NEXIUM	40		GERD		mg	qd/od	Yes	PO	Yes	No	12_041		2008			12	Early Termination	54	Female	10NOV16	293	Placebo	>=250 mg/day	Yes	Yes	>=250 mg/day	No	Yes	Yes	Yes	Yes
5	ZOLPIDEM	10		INSOMNIA		mg	qd/od	Yes	PO	Yes	No	12_041		2002			12	Early Termination	54	Female	10NOV16	293	Placebo	>=250 mg/day	Yes	Yes	>=250 mg/day	No	Yes	Yes	Yes	Yes
6	CLONAZEPAM	0.5		ANXIETY		mg	bid	Yes	PO	Yes	No	12_041		2002			12	Early Termination	54	Female	10NOV16	293	Placebo	>=250 mg/day	Yes	Yes	>=250 mg/day	No	Yes	Yes	Yes	Yes
7	ASPIRIN	81		PROPHYLACTIC		mg	qd/od	Yes	PO	Yes	No	12_041		2000			12	Early Termination	54	Female	10NOV16	293	Placebo	>=250 mg/day	Yes	Yes	>=250 mg/day	No	Yes	Yes	Yes	Yes
8	BUSPIRONE HCL	10		ANXIETY		mg	tid	Yes	PO	Yes	No	12_041		2002			12	Early Termination	54	Female	10NOV16	293	Placebo	>=250 mg/day	Yes	Yes	>=250 mg/day	No	Yes	Yes	Yes	Yes
9	ROSUVASTATIN	10		DYSLIPIDEMIA		mg	qd/od	Yes	PO	Yes	No	12_041		2015			12	Early Termination	54	Female	10NOV16	293	Placebo	>=250 mg/day	Yes	Yes	>=250 mg/day	No	Yes	Yes	Yes	Yes
10	DICYCLOMINE	20		IRRITABLE BOWEL SYNDROME		mg	qd/od	Yes	PO	Yes	No	12_041	20SEP16	20SEP2016			12	Early Termination	54	Female	10NOV16	293	Placebo	>=250 mg/day	Yes	Yes	>=250 mg/day	No	Yes	Yes	Yes	Yes
11	DICLOFENAC SODIUM	75		OSTEOARTHRITIS		mg	prn	Yes	PO	Yes	No	12_041	20SEP16	20SEP2016			12	Early Termination	54	Female	10NOV16	293	Placebo	>=250 mg/day	Yes	Yes	>=250 mg/day	No	Yes	Yes	Yes	Yes
12	DICLOFENAC SODIUM 1%	1		OSTEOARTHRITIS		g	prn	Yes	top	Yes	No	12_041	20SEP16	20SEP2016			12	Early Termination	54	Female	10NOV16	293	Placebo	>=250 mg/day	Yes	Yes	>=250 mg/day	No	Yes	Yes	Yes	Yes
13	FENOFIBRATE	134		DYSLIPIDEMIA		mg	qd/od	Yes	PO	Yes	No	12_041	20JUL16	20JUL2016			12	Early Termination	54	Female	10NOV16	293	Placebo	>=250 mg/day	Yes	Yes	>=250 mg/day	No	Yes	Yes	Yes	Yes
14	GEMFIBROZIL	600		DYSLIPIDEMIA		mg	qd/od	Yes	PO	Yes	No	12_041	21JUL16	21JUL2016			12	Early Termination	54	Female	10NOV16	293	Placebo	>=250 mg/day	Yes	Yes	>=250 mg/day	No	Yes	Yes	Yes	Yes
15	PEXEVA	40		DEPRESSION		mg	qd/od	Yes	PO	Yes	No	12_041	03OCT16	03OCT2016			12	Early Termination	54	Female	10NOV16	293	Placebo	>=250 mg/day	Yes	Yes	>=250 mg/day	No	Yes	Yes	Yes	Yes
16	ESTRACE 0.01%	1		VAGINAL DRYNESS		g	bid	Yes	vag	Yes	No	12_041	14SEP16	14SEP2016			12	Early Termination	54	Female	10NOV16	293	Placebo	>=250 mg/day	Yes	Yes	>=250 mg/day	No	Yes	Yes	Yes	Yes
1	METFORMIN	500		DIABETES MELLITUS TYPE II		mg	bid	Yes	PO	Yes	No	12_043		2012			12	Entered	77	Male	03NOV16	283	MF4637	>=250 mg/day	Yes	Yes	>=250 mg/day	No	Yes	Yes	Yes	Yes
2	LOSARTAN	100		HYPERTENSION		mg	qd/od	Yes	PO	Yes	No	12_043		2013			12	Entered	77	Male	03NOV16	283	MF4637	>=250 mg/day	Yes	Yes	>=250 mg/day	No	Yes	Yes	Yes	Yes
3	AMLODIPINE	10		HYPERTENSION		mg	qd/od	Yes	PO	Yes	No	12_043		2013			12	Entered	77	Male	03NOV16	283	MF4637	>=250 mg/day	Yes	Yes	>=250 mg/day	No	Yes	Yes	Yes	Yes
4	CRESTOR	40		DYSLIPIDEMIA		mg	qd/od	Yes	PO	Yes	No	12_043		2014			12	Entered	77	Male	03NOV16	283	MF4637	>=250 mg/day	Yes	Yes	>=250 mg/day	No	Yes	Yes	Yes	Yes
5	PANTOPRAZOLE	40		GERD		mg	qd/od	Yes	PO	Yes	No	12_043		MAY2016			12	Entered	77	Male	03NOV16	283	MF4637	>=250 mg/day	Yes	Yes	>=250 mg/day	No	Yes	Yes	Yes	Yes
6	CLOPIDOGREL	75		PROPHYLACTIC		mg	qd/od	Yes	PO	Yes	No	12_043		2013			12	Entered	77	Male	03NOV16	283	MF4637	>=250 mg/day	Yes	Yes	>=250 mg/day	No	Yes	Yes	Yes	Yes
7	TRAZODONE	50		DEPRESSION		mg	qd/od	Yes	PO	Yes	No	12_043	12SEP16	12SEP2016			12	Entered	77	Male	03NOV16	283	MF4637	>=250 mg/day	Yes	Yes	>=250 mg/day	No	Yes	Yes	Yes	Yes
8	NAMENDA	28		MEMORY LOSS		mg	qd/od	Yes	PO	Yes	No	12_043	12SEP16	12SEP2016			12	Entered	77	Male	03NOV16	283	MF4637	>=250 mg/day	Yes	Yes	>=250 mg/day	No	Yes	Yes	Yes	Yes
9	ESCITALOPRAM	20		DEPRESSION		mg	qd/od	Yes	PO	Yes	No	12_043	12SEP16	12SEP2016			12	Entered	77	Male	03NOV16	283	MF4637	>=250 mg/day	Yes	Yes	>=250 mg/day	No	Yes	Yes	Yes	Yes
10	TEMAZEPAM	15		INSOMNIA		mg	qd/od	Yes	PO	Yes	No	12_043	12SEP16	12SEP2016			12	Entered	77	Male	03NOV16	283	MF4637	>=250 mg/day	Yes	Yes	>=250 mg/day	No	Yes	Yes	Yes	Yes
11	ARIPIPRAZOLE	20		DEPRESSION		mg	qd/od	Yes	PO	Yes	No	12_043	12SEP16	12SEP2016			12	Entered	77	Male	03NOV16	283	MF4637	>=250 mg/day	Yes	Yes	>=250 mg/day	No	Yes	Yes	Yes	Yes
12	ALPRAZOLAM	1		ANXIETY		mg	qd/od	Yes	PO	Yes	No	12_043	12SEP16	12SEP2016			12	Entered	77	Male	03NOV16	283	MF4637	>=250 mg/day	Yes	Yes	>=250 mg/day	No	Yes	Yes	Yes	Yes
13	ALENDRONATE	40	WEEKLY	OSTEOPOROSIS		mg	other (specify)	Yes	PO	Yes	No	12_043	12SEP16	12SEP2016			12	Entered	77	Male	03NOV16	283	MF4637	>=250 mg/day	Yes	Yes	>=250 mg/day	No	Yes	Yes	Yes	Yes
14	VOLTAREN GEL 1%	1		OSTEOARTHROSIS		g	prn	Yes	top	Yes	No	12_043	12SEP16	12SEP2016			12	Entered	77	Male	03NOV16	283	MF4637	>=250 mg/day	Yes	Yes	>=250 mg/day	No	Yes	Yes	Yes	Yes
15	SYMBICORT	160/4.5		COPD		ug	bid	Yes	inh	Yes	No	12_043		2015			12	Entered	77	Male	03NOV16	283	MF4637	>=250 mg/day	Yes	Yes	>=250 mg/day	No	Yes	Yes	Yes	Yes
16	RESTASIS 0.05%	1		DRY EYES		g	qd/od	Yes	eye	Yes	No	12_043	12SEP16	12SEP2016			12	Entered	77	Male	03NOV16	283	MF4637	>=250 mg/day	Yes	Yes	>=250 mg/day	No	Yes	Yes	Yes	Yes
17	PROCTOZONE CREAM 2.5%	1		HEMORRHOIDS		g	qd/od	Yes	top	Yes	No	12_043	12SEP16	12SEP2016			12	Entered	77	Male	03NOV16	283	MF4637	>=250 mg/day	Yes	Yes	>=250 mg/day	No	Yes	Yes	Yes	Yes
18	LIDOCAINE PATCH 5%	1		CHRONIC LOW BACK PAIN		mg	prn	Yes	top	Yes	No	12_043	12SEP16	12SEP2016			12	Entered	77	Male	03NOV16	283	MF4637	>=250 mg/day	Yes	Yes	>=250 mg/day	No	Yes	Yes	Yes	Yes
19	EXELON	1		MEMORY LOSS		mg	qd/od	Yes	top	Yes	No	12_043	30AUG16	30AUG2016			12	Entered	77	Male	03NOV16	283	MF4637	>=250 mg/day	Yes	Yes	>=250 mg/day	No	Yes	Yes	Yes	Yes
20	NAMENDA	10		MEMORY LOSS		mg	bid		PO	No	No	12_043	09AUG16	09AUG2016		SEP2016	12	Entered	77	Male	03NOV16	283	MF4637	>=250 mg/day	Yes	Yes	>=250 mg/day	No	Yes	Yes	Yes	Yes
1	METFORMIN	850		DIABETES MELLITUS TYPE II		mg	tid	Yes	PO	Yes	No	12_044		2005			12	Entered	66	Male	02NOV16	281	Placebo	>=250 mg/day	Yes	Yes	>=250 mg/day	No	Yes	Yes	Yes	Yes
2	LISINOPRIL	10		HYPERTENSION		mg	qd/od	Yes	PO	Yes	No	12_044		2007			12	Entered	66	Male	02NOV16	281	Placebo	>=250 mg/day	Yes	Yes	>=250 mg/day	No	Yes	Yes	Yes	Yes
3	SIMVASTATIN	40		DYSLIPIDEMIA		mg	qd/od	Yes	PO	Yes	No	12_044		2014			12	Entered	66	Male	02NOV16	281	Placebo	>=250 mg/day	Yes	Yes	>=250 mg/day	No	Yes	Yes	Yes	Yes
4	GLIPIZIDE	10		DIABETES MELLITUS TYPE II		mg	qd/od	Yes	PO	Yes	No	12_044		2013			12	Entered	66	Male	02NOV16	281	Placebo	>=250 mg/day	Yes	Yes	>=250 mg/day	No	Yes	Yes	Yes	Yes
1	GLYBURIDE/METFORMIN	5/500		DIABETES MELLITUS TYPE II		mg	bid	Yes	PO	Yes	No	12_046		2013			12	Entered	75	Male	03NOV16	284	MF4637	>=250 mg/day	Yes	Yes	>=250 mg/day	No	Yes	Yes	Yes	Yes
2	AMLODIPINE/VALSARTAN/HCTZ	5/160/12.5		HYPERTENSION		mg	qd/od	Yes	PO	Yes	No	12_046		2013			12	Entered	75	Male	03NOV16	284	MF4637	>=250 mg/day	Yes	Yes	>=250 mg/day	No	Yes	Yes	Yes	Yes
3	CARVEDILOL	3.125		HYPERTENSION		mg	bid	Yes	PO	Yes	No	12_046		2014			12	Entered	75	Male	03NOV16	284	MF4637	>=250 mg/day	Yes	Yes	>=250 mg/day	No	Yes	Yes	Yes	Yes
4	SIMVASTATIN	10		DYSLIPIDEMIA		mg	qd/od	Yes	PO	Yes	No	12_046		2012			12	Entered	75	Male	03NOV16	284	MF4637	>=250 mg/day	Yes	Yes	>=250 mg/day	No	Yes	Yes	Yes	Yes
5	ASPIRIN	325		PROPHYLACTIC		mg	qd/od	Yes	PO	Yes	No	12_046		2006			12	Entered	75	Male	03NOV16	284	MF4637	>=250 mg/day	Yes	Yes	>=250 mg/day	No	Yes	Yes	Yes	Yes
6	FLUTICASONE	100		ALLERGIC RHINITIS		ug	prn	Yes	IN	Yes	No	12_046		2014			12	Entered	75	Male	03NOV16	284	MF4637	>=250 mg/day	Yes	Yes	>=250 mg/day	No	Yes	Yes	Yes	Yes
1	LANTUS	2		DIABETES MELLITUS TYPE II		IU	qd/od	Yes	SC	Yes	No	12_047		2014			12	Screen Failure	46	Male							<250 mg/day	Yes	No	No	No	No
2	LISINOPRIL	20		HYPERTENSION		mg	qd/od	Yes	PO	Yes	No	12_047		2012			12	Screen Failure	46	Male							<250 mg/day	Yes	No	No	No	No
3	ASPIRIN	81		PROPHYLACTIC		mg	qd/od	Yes	PO	Yes	No	12_047		2012			12	Screen Failure	46	Male							<250 mg/day	Yes	No	No	No	No
4	HUMULIN R	12		DIABETES MELLITUS TYPE II		IU	tid	Yes	SC	Yes	No	12_047		2016			12	Screen Failure	46	Male							<250 mg/day	Yes	No	No	No	No
5	DICLOFENAC SODIUM ER	100		BACK PAIN		mg	prn	Yes	PO	Yes	No	12_047		2016			12	Screen Failure	46	Male							<250 mg/day	Yes	No	No	No	No
1	METFORMIN	500		DIABETES MELLITUS TYPE II		mg	bid	Yes	PO	Yes	No	12_048		2013			12	Entered	63	Female	03NOV16	285	MF4637	<250 mg/day	Yes	No	<250 mg/day	No	Yes	Yes	Yes	Yes
2	LISINOPRIL	10		HYPERTENSION		mg	qd/od	Yes	PO	Yes	No	12_048		JUL2016			12	Entered	63	Female	03NOV16	285	MF4637	<250 mg/day	Yes	No	<250 mg/day	No	Yes	Yes	Yes	Yes
3	ESCITALOPRAM	10		DEPRESSION		mg	qd/od	Yes	PO	Yes	No	12_048		2010			12	Entered	63	Female	03NOV16	285	MF4637	<250 mg/day	Yes	No	<250 mg/day	No	Yes	Yes	Yes	Yes
4	ALPRAZOLAM	2		ANXIETY		mg	bid	Yes	PO	Yes	No	12_048		2011			12	Entered	63	Female	03NOV16	285	MF4637	<250 mg/day	Yes	No	<250 mg/day	No	Yes	Yes	Yes	Yes
5	DICLOFENAC	50		CHRONIC CERVICAL PAIN		mg	prn	Yes	PO	Yes	No	12_048		2013			12	Entered	63	Female	03NOV16	285	MF4637	<250 mg/day	Yes	No	<250 mg/day	No	Yes	Yes	Yes	Yes
6	ESOMEPRAZOLE	40		GERD		mg	qd/od	Yes	PO	Yes	No	12_048		2013			12	Entered	63	Female	03NOV16	285	MF4637	<250 mg/day	Yes	No	<250 mg/day	No	Yes	Yes	Yes	Yes
7	NAMENDA	28		MEMORY LOSS		mg	qd/od	Yes	PO	Yes	No	12_048		2015			12	Entered	63	Female	03NOV16	285	MF4637	<250 mg/day	Yes	No	<250 mg/day	No	Yes	Yes	Yes	Yes
8	MULTIVITAMIN	1		SUPPLEMENTAL		tab	qd/od	Yes	PO	Yes	No	12_048		2016			12	Entered	63	Female	03NOV16	285	MF4637	<250 mg/day	Yes	No	<250 mg/day	No	Yes	Yes	Yes	Yes
9	OMEPRAZOLE	40		GERD		mg	qd/od	Yes	PO	Yes	No	12_048	03JUL15	03JUL2015			12	Entered	63	Female	03NOV16	285	MF4637	<250 mg/day	Yes	No	<250 mg/day	No	Yes	Yes	Yes	Yes
10	ATORVASTATIN	10		DYSLIPIDEMIA		mg	qd/od		PO	No	No	12_048	05JUL16	05JUL2016	30SEP16	30SEP2016	12	Entered	63	Female	03NOV16	285	MF4637	<250 mg/day	Yes	No	<250 mg/day	No	Yes	Yes	Yes	Yes
11	ALENDRONATE	70	weekly	OSTEOPOROSIS		mg	other (specify)	Yes	PO	Yes	No	12_048	26AUG16	26AUG2016			12	Entered	63	Female	03NOV16	285	MF4637	<250 mg/day	Yes	No	<250 mg/day	No	Yes	Yes	Yes	Yes
12	PREMARIN VAGINAL CREAM	1		ATROPHIC VAGINITIS		g	qd/od	Yes	vag	Yes	No	12_048	23JUL16	23JUL2016			12	Entered	63	Female	03NOV16	285	MF4637	<250 mg/day	Yes	No	<250 mg/day	No	Yes	Yes	Yes	Yes
13	METRONIDAZOLE 1%	1		FACE CELLULITIS		g	qd/od		top	No	No	12_048	10JUL16	10JUL2016		JUL2016	12	Entered	63	Female	03NOV16	285	MF4637	<250 mg/day	Yes	No	<250 mg/day	No	Yes	Yes	Yes	Yes
14	SULFAMETHOXAZOLE	160		FACE CELULITIS		mg	bid		PO	No	No	12_048	11JUL16	11JUL2016	21JUL16	21JUL2016	12	Entered	63	Female	03NOV16	285	MF4637	<250 mg/day	Yes	No	<250 mg/day	No	Yes	Yes	Yes	Yes
15	SILVER SULFADIAZINE	1		BURN WOUND ON RIGHT HAND		g	qd/od		top	No	No	12_048	29JUL16	29JUL2016		AUG2016	12	Entered	63	Female	03NOV16	285	MF4637	<250 mg/day	Yes	No	<250 mg/day	No	Yes	Yes	Yes	Yes
16	VOLTAREN GEL	1		OSTEOARTHROSIS		g	prn	Yes	top	Yes	No	12_048	24AUG16	24AUG2016			12	Entered	63	Female	03NOV16	285	MF4637	<250 mg/day	Yes	No	<250 mg/day	No	Yes	Yes	Yes	Yes
17	CICLOPIROX SOLUTION 8%	1		ONYCHOMYCOSIS		mL	qd/od	Yes	top	Yes	No	12_048	24AUG16	24AUG2016			12	Entered	63	Female	03NOV16	285	MF4637	<250 mg/day	Yes	No	<250 mg/day	No	Yes	Yes	Yes	Yes
1	ENALAPRIL MALEATE	20		HYPERTENSION		mg	qd/od	Yes	PO	Yes	No	12_054		OCT2015			12	Entered	60	Female	03NOV16	286	Placebo	>=250 mg/day	Yes	Yes	>=250 mg/day	No	Yes	Yes	Yes	Yes
2	HYDROCHLOROTHIAZIDE	25		HYPERTENSION		mg	qd/od	Yes	PO	Yes	No	12_054		OCT2015			12	Entered	60	Female	03NOV16	286	Placebo	>=250 mg/day	Yes	Yes	>=250 mg/day	No	Yes	Yes	Yes	Yes
3	ASPIRIN EC	81		CARDIOVASCULAR PROTECTOR		mg	qd/od	Yes	PO	Yes	No	12_054		2010			12	Entered	60	Female	03NOV16	286	Placebo	>=250 mg/day	Yes	Yes	>=250 mg/day	No	Yes	Yes	Yes	Yes
4	MIRTAZAPINE	7.5		DEPRESSION		mg	qd/od	Yes	PO	Yes	No	12_054		2015			12	Entered	60	Female	03NOV16	286	Placebo	>=250 mg/day	Yes	Yes	>=250 mg/day	No	Yes	Yes	Yes	Yes
5	JANUVIA	100		DIABETES MELLITUS TYPE II		mg	qd/od	Yes	PO	Yes	No	12_054		2015			12	Entered	60	Female	03NOV16	286	Placebo	>=250 mg/day	Yes	Yes	>=250 mg/day	No	Yes	Yes	Yes	Yes
6	DONEPEZIL HCL	10		MEMORY LOSS		mg	qd/od	Yes	PO	Yes	No	12_054		2015			12	Entered	60	Female	03NOV16	286	Placebo	>=250 mg/day	Yes	Yes	>=250 mg/day	No	Yes	Yes	Yes	Yes
7	DOXEPIN	25		DEPRESSION		mg	qd/od	Yes	PO	Yes	No	12_054		2015			12	Entered	60	Female	03NOV16	286	Placebo	>=250 mg/day	Yes	Yes	>=250 mg/day	No	Yes	Yes	Yes	Yes
8	OXCARBAZEPINE	300		BIPOLAR DISORDER		mg	qd/od	Yes	PO	Yes	No	12_054		2015			12	Entered	60	Female	03NOV16	286	Placebo	>=250 mg/day	Yes	Yes	>=250 mg/day	No	Yes	Yes	Yes	Yes
9	CLONAZEPAM	1		ANXIETY		mg	tid	Yes	PO	Yes	No	12_054		2015			12	Entered	60	Female	03NOV16	286	Placebo	>=250 mg/day	Yes	Yes	>=250 mg/day	No	Yes	Yes	Yes	Yes
10	TRIFLUOPERAZINE	5		BIPOLAR DISORDER		mg	qd/od	Yes	PO	Yes	No	12_054		2015			12	Entered	60	Female	03NOV16	286	Placebo	>=250 mg/day	Yes	Yes	>=250 mg/day	No	Yes	Yes	Yes	Yes
11	ATORVASTATIN	20		DYSLIPIDEMIA		mg	qd/od	Yes	PO	Yes	No	12_054		2015			12	Entered	60	Female	03NOV16	286	Placebo	>=250 mg/day	Yes	Yes	>=250 mg/day	No	Yes	Yes	Yes	Yes
12	OMEPRAZOLE	40		GASTROESOPHAGEAL REFLUX DISEASE		mg	qd/od	Yes	PO	Yes	No	12_054		2015			12	Entered	60	Female	03NOV16	286	Placebo	>=250 mg/day	Yes	Yes	>=250 mg/day	No	Yes	Yes	Yes	Yes
13	ZOLPIDEM	10		INSOMNIA		mg	qd/od	Yes	PO	Yes	No	12_054		2015			12	Entered	60	Female	03NOV16	286	Placebo	>=250 mg/day	Yes	Yes	>=250 mg/day	No	Yes	Yes	Yes	Yes
14	LANTUS	70		DIABETES MELLITUS TYPE II		IU	qd/od	Yes	SC	Yes	No	12_054		2015			12	Entered	60	Female	03NOV16	286	Placebo	>=250 mg/day	Yes	Yes	>=250 mg/day	No	Yes	Yes	Yes	Yes
15	HUMALOG	28		DIABETES MELLITUS TYPE II		IU	tid	Yes	SC	Yes	No	12_054		2015			12	Entered	60	Female	03NOV16	286	Placebo	>=250 mg/day	Yes	Yes	>=250 mg/day	No	Yes	Yes	Yes	Yes
16	GABAPETIN	300		DIABETIC NEUROPATHY		mg	bid	Yes	PO	Yes	No	12_054		2015			12	Entered	60	Female	03NOV16	286	Placebo	>=250 mg/day	Yes	Yes	>=250 mg/day	No	Yes	Yes	Yes	Yes
17	OMEGA 3	1200		SUPPLEMENTAL		mg	bid		PO	No	No	12_054		2015		JUL2016	12	Entered	60	Female	03NOV16	286	Placebo	>=250 mg/day	Yes	Yes	>=250 mg/day	No	Yes	Yes	Yes	Yes
1	LISINOPRIL	10		HYPERTENSION		mg	qd/od	Yes	PO	Yes	No	12_056		2014			12	Early Termination	61	Male	03NOV16	287	Placebo	<250 mg/day	Yes	Yes	<250 mg/day	No	Yes	Yes	Yes	Yes
2	METOPROLOL ER	25		HYPERTENSION		mg	bid	Yes	PO	Yes	No	12_056		MAR2014			12	Early Termination	61	Male	03NOV16	287	Placebo	<250 mg/day	Yes	Yes	<250 mg/day	No	Yes	Yes	Yes	Yes
3	ASPIRIN	81		CARDIOVASCULAR PROTECTOR		mg	qd/od	Yes	PO	Yes	No	12_056		2010			12	Early Termination	61	Male	03NOV16	287	Placebo	<250 mg/day	Yes	Yes	<250 mg/day	No	Yes	Yes	Yes	Yes
4	PENTOXIFYLLINE	400		PERIPHERAL ARTERIAL DISEASE		mg	tid	Yes	PO	Yes	No	12_056		2015			12	Early Termination	61	Male	03NOV16	287	Placebo	<250 mg/day	Yes	Yes	<250 mg/day	No	Yes	Yes	Yes	Yes
5	METFORMIN	500		DIABETES MELLITUS TYPE II		mg	bid	Yes	PO	Yes	No	12_056	13MAY15	13MAY2015			12	Early Termination	61	Male	03NOV16	287	Placebo	<250 mg/day	Yes	Yes	<250 mg/day	No	Yes	Yes	Yes	Yes
6	BUPROPION XL	300		DEPRESSION		mg	qd/od	Yes	PO	Yes	No	12_056		FEB2016			12	Early Termination	61	Male	03NOV16	287	Placebo	<250 mg/day	Yes	Yes	<250 mg/day	No	Yes	Yes	Yes	Yes
7	LYRICA	75		DIABETIC NEUROPATHY		mg	bid	Yes	PO	Yes	No	12_056	13OCT16	13OCT2016			12	Early Termination	61	Male	03NOV16	287	Placebo	<250 mg/day	Yes	Yes	<250 mg/day	No	Yes	Yes	Yes	Yes
8	DONEPEZIL	10		MEMORY LOSS		mg	qd/od	Yes	PO	Yes	No	12_056		2015			12	Early Termination	61	Male	03NOV16	287	Placebo	<250 mg/day	Yes	Yes	<250 mg/day	No	Yes	Yes	Yes	Yes
9	ATORVASTATIN	40		DYSLIPIDEMIA		mg	qd/od	Yes	PO	Yes	No	12_056		SEP2015			12	Early Termination	61	Male	03NOV16	287	Placebo	<250 mg/day	Yes	Yes	<250 mg/day	No	Yes	Yes	Yes	Yes
10	ALPRAZOLAM	0.25		ANXIETY		mg	bid	Yes	PO	Yes	No	12_056		2015			12	Early Termination	61	Male	03NOV16	287	Placebo	<250 mg/day	Yes	Yes	<250 mg/day	No	Yes	Yes	Yes	Yes
11	CLOBETASOL PROPIONATE 0.05%	1		ATOPIC DERMATITIS		g	bid	Yes	top	Yes	No	12_056		2015			12	Early Termination	61	Male	03NOV16	287	Placebo	<250 mg/day	Yes	Yes	<250 mg/day	No	Yes	Yes	Yes	Yes
12	FUROSEMIDE	20		HYPERTENSION		mg	qd/od	Yes	PO	Yes	No	12_056		2015			12	Early Termination	61	Male	03NOV16	287	Placebo	<250 mg/day	Yes	Yes	<250 mg/day	No	Yes	Yes	Yes	Yes
13	OMEPRAZOLE	40		ESOPHAGITIS		mg	bid	Yes	PO	Yes	No	12_056		2015			12	Early Termination	61	Male	03NOV16	287	Placebo	<250 mg/day	Yes	Yes	<250 mg/day	No	Yes	Yes	Yes	Yes
14	PERPHENAZINE	8		DEPRESSION		mg	qd/od	Yes	PO	Yes	No	12_056		2015			12	Early Termination	61	Male	03NOV16	287	Placebo	<250 mg/day	Yes	Yes	<250 mg/day	No	Yes	Yes	Yes	Yes
15	VOLTAREN GEL 1%	1		RADICULOPATHY		g	bid	Yes	top	Yes	No	12_056		2015			12	Early Termination	61	Male	03NOV16	287	Placebo	<250 mg/day	Yes	Yes	<250 mg/day	No	Yes	Yes	Yes	Yes
16	MUPIROCIN 2%	1		LEFT LEG CELLULITIS		g	qd/od		top	Yes	No	12_056		SEP2016		SEP2016	12	Early Termination	61	Male	03NOV16	287	Placebo	<250 mg/day	Yes	Yes	<250 mg/day	No	Yes	Yes	Yes	Yes
17	IBUPROFEN	800		RADICULOPATHY		mg	prn	Yes	PO	Yes	No	12_056		JUL2016			12	Early Termination	61	Male	03NOV16	287	Placebo	<250 mg/day	Yes	Yes	<250 mg/day	No	Yes	Yes	Yes	Yes
18	KETOCONAZOLE 2%	1		ATOPIC DERMATITIS		g	qd/od	Yes	top	Yes	No	12_056		DEC2015			12	Early Termination	61	Male	03NOV16	287	Placebo	<250 mg/day	Yes	Yes	<250 mg/day	No	Yes	Yes	Yes	Yes
19	ARIPIPRAZOLE	2		DEPRESSION		mg	qd/od	Yes	PO	Yes	No	12_056		AUG2015			12	Early Termination	61	Male	03NOV16	287	Placebo	<250 mg/day	Yes	Yes	<250 mg/day	No	Yes	Yes	Yes	Yes
20	AMMONIUM LACTATE	1		ATOPIC DERMATITIS		g	qd/od	Yes	top	Yes	No	12_056		AUG2015			12	Early Termination	61	Male	03NOV16	287	Placebo	<250 mg/day	Yes	Yes	<250 mg/day	No	Yes	Yes	Yes	Yes
21	ENOXAPARIN	1.2	Q12H	DEEP VEIN THROMBOSIS	1	mL	other (specify)		SC	Yes	Yes	12_056	03JAN17	03JAN2017	05JAN17	05JAN2017	12	Early Termination	61	Male	03NOV16	287	Placebo	<250 mg/day	Yes	Yes	<250 mg/day	No	Yes	Yes	Yes	Yes
22	XARELTO	15		DEEP VEIN THROMBOSIS PROPHYLAXIS	1	mg	bid	Yes	PO	Yes	Yes	12_056	05JAN17	05JAN2017			12	Early Termination	61	Male	03NOV16	287	Placebo	<250 mg/day	Yes	Yes	<250 mg/day	No	Yes	Yes	Yes	Yes
1	LOSARTAN	100		HYPERTENSION		mg	qd/od	Yes	PO	Yes	No	12_057		2015			12	Entered	65	Female	10NOV16	294	Placebo	<250 mg/day	Yes	No	<250 mg/day	No	Yes	Yes	Yes	Yes
2	HYDROCHLOROTHIAZIDE	12.5		HYPERTENSION		mg	qd/od	Yes	PO	Yes	No	12_057		OCT2016			12	Entered	65	Female	10NOV16	294	Placebo	<250 mg/day	Yes	No	<250 mg/day	No	Yes	Yes	Yes	Yes
3	CYCLOBENZAPRINE	10		MUSCLE SPASMS		mg	qd/od		PO	No	No	12_057	05OCT16	05OCT2016	15OCT16	15OCT2016	12	Entered	65	Female	10NOV16	294	Placebo	<250 mg/day	Yes	No	<250 mg/day	No	Yes	Yes	Yes	Yes
4	RANITIDINE	150		GERD		mg	qd/od	Yes	PO	Yes	No	12_057		2015			12	Entered	65	Female	10NOV16	294	Placebo	<250 mg/day	Yes	No	<250 mg/day	No	Yes	Yes	Yes	Yes
5	ALPRAZOLAM	1		ANXIETY		mg	qd/od	Yes	PO	Yes	No	12_057		2016			12	Entered	65	Female	10NOV16	294	Placebo	<250 mg/day	Yes	No	<250 mg/day	No	Yes	Yes	Yes	Yes
6	LANTUS	35		DIABETES MELLITUS TYPE II		IU	qd/od	Yes	SC	Yes	No	12_057		2016			12	Entered	65	Female	10NOV16	294	Placebo	<250 mg/day	Yes	No	<250 mg/day	No	Yes	Yes	Yes	Yes
7	AMMONIUM LACTATE	1		DRY SKIN		g	qd/od	Yes	top	Yes	No	12_057	05OCT16	05OCT2016			12	Entered	65	Female	10NOV16	294	Placebo	<250 mg/day	Yes	No	<250 mg/day	No	Yes	Yes	Yes	Yes
8	VOLTAREN GEL	1		MUSCLE SPASMS		g	prn		top	No	No	12_057	05OCT16	05OCT2016	15OCT16	15OCT2016	12	Entered	65	Female	10NOV16	294	Placebo	<250 mg/day	Yes	No	<250 mg/day	No	Yes	Yes	Yes	Yes
9	ASPIRIN	81		CARDIOPROTECTOR		mg	qd/od	Yes	PO	Yes	No	12_057		2015			12	Entered	65	Female	10NOV16	294	Placebo	<250 mg/day	Yes	No	<250 mg/day	No	Yes	Yes	Yes	Yes
10	NOVOLOG FLEXPEN	7		DIABETES MELLITUS TYPE II		IU	qd/od	Yes	SC	Yes	No	12_057		2015			12	Entered	65	Female	10NOV16	294	Placebo	<250 mg/day	Yes	No	<250 mg/day	No	Yes	Yes	Yes	Yes
11	OMEPRAZOLE	40		GASTRIC PROTECTOR		mg	qd/od		PO	No	No	12_057	05OCT16	05OCT2016	15OCT16	15OCT2016	12	Entered	65	Female	10NOV16	294	Placebo	<250 mg/day	Yes	No	<250 mg/day	No	Yes	Yes	Yes	Yes
1	METFORMIN	500		DIABETES MELLITUS TYPE II		mg	qd/od	Yes	PO	Yes	No	12_058		2000			12	Entered	68	Male	16NOV16	181	Placebo	<250 mg/day	Yes	Yes	<250 mg/day	No	Yes	Yes	Yes	Yes
2	GLIMEPIRIDE	1		DIABETES MELLITUS TYPE II		mg	qd/od	Yes	PO	Yes	No	12_058		2013			12	Entered	68	Male	16NOV16	181	Placebo	<250 mg/day	Yes	Yes	<250 mg/day	No	Yes	Yes	Yes	Yes
3	METOPROLOL	50		HYPERTENSION		mg	qd/od	Yes	PO	Yes	No	12_058		2000			12	Entered	68	Male	16NOV16	181	Placebo	<250 mg/day	Yes	Yes	<250 mg/day	No	Yes	Yes	Yes	Yes
4	AMLODIPINE	5		HYPERTENSION		mg	qd/od	Yes	PO	Yes	No	12_058		2000			12	Entered	68	Male	16NOV16	181	Placebo	<250 mg/day	Yes	Yes	<250 mg/day	No	Yes	Yes	Yes	Yes
5	VALSARTAN/HCTZ	320/25		HYPERTENSION		mg	qd/od	Yes	PO	Yes	No	12_058		2011			12	Entered	68	Male	16NOV16	181	Placebo	<250 mg/day	Yes	Yes	<250 mg/day	No	Yes	Yes	Yes	Yes
6	ATORVASTATIN	40		DYSLIPIDEMIA		mg	qd/od	Yes	PO	Yes	No	12_058		2006			12	Entered	68	Male	16NOV16	181	Placebo	<250 mg/day	Yes	Yes	<250 mg/day	No	Yes	Yes	Yes	Yes
7	LANSOPRAZOLE	30		GERD		mg	qd/od	Yes	PO	Yes	No	12_058		2006			12	Entered	68	Male	16NOV16	181	Placebo	<250 mg/day	Yes	Yes	<250 mg/day	No	Yes	Yes	Yes	Yes
8	XANAX	2		ANXIETY		mg	bid	Yes	PO	Yes	No	12_058		2014			12	Entered	68	Male	16NOV16	181	Placebo	<250 mg/day	Yes	Yes	<250 mg/day	No	Yes	Yes	Yes	Yes
9	TEMAZEPAM	30		INSOMNIA		mg	qd/od	Yes	PO	Yes	No	12_058		2014			12	Entered	68	Male	16NOV16	181	Placebo	<250 mg/day	Yes	Yes	<250 mg/day	No	Yes	Yes	Yes	Yes
10	ESCITALOPRAM	20		DEPRESSION		mg	qd/od	Yes	PO	Yes	No	12_058		2014			12	Entered	68	Male	16NOV16	181	Placebo	<250 mg/day	Yes	Yes	<250 mg/day	No	Yes	Yes	Yes	Yes
11	OLANZAPINE	15		BIPOLAR DISORDER		mg	qd/od	Yes	PO	Yes	No	12_058		2015			12	Entered	68	Male	16NOV16	181	Placebo	<250 mg/day	Yes	Yes	<250 mg/day	No	Yes	Yes	Yes	Yes
12	CICLOPIROX 1%	1		ONYCHOMYCOSIS		g	tid	Yes	top	Yes	No	12_058		2015			12	Entered	68	Male	16NOV16	181	Placebo	<250 mg/day	Yes	Yes	<250 mg/day	No	Yes	Yes	Yes	Yes
13	GABAPENTIN	300		DIABETIC NEUROPATHY		mg	bid	Yes	PO	Yes	No	12_058		2014			12	Entered	68	Male	16NOV16	181	Placebo	<250 mg/day	Yes	Yes	<250 mg/day	No	Yes	Yes	Yes	Yes
14	FOLIC ACID	1		FOLIC ACID DEFICIENCY		mg	qd/od	Yes	PO	Yes	No	12_058		2016			12	Entered	68	Male	16NOV16	181	Placebo	<250 mg/day	Yes	Yes	<250 mg/day	No	Yes	Yes	Yes	Yes
15	ASPIRIN	81		CARDIOPROTECTOR		mg	qd/od	Yes	PO	Yes	No	12_058		2006			12	Entered	68	Male	16NOV16	181	Placebo	<250 mg/day	Yes	Yes	<250 mg/day	No	Yes	Yes	Yes	Yes
16	MELOXICAM	15		OSTEOARTHRITIS		mg	bid		PO	No	No	12_058	28JUL16	28JUL2016		AUG2016	12	Entered	68	Male	16NOV16	181	Placebo	<250 mg/day	Yes	Yes	<250 mg/day	No	Yes	Yes	Yes	Yes
17	CLONAZEPAM	2		ANXIETY		mg	bid		PO	No	No	12_058	07JUL16	07JUL2016		OCT2016	12	Entered	68	Male	16NOV16	181	Placebo	<250 mg/day	Yes	Yes	<250 mg/day	No	Yes	Yes	Yes	Yes
18	DONEPEZIL	5		MEMORY LOSS		mg	qd/od	Yes	PO	Yes	No	12_058	07JUL16	07JUL2016			12	Entered	68	Male	16NOV16	181	Placebo	<250 mg/day	Yes	Yes	<250 mg/day	No	Yes	Yes	Yes	Yes
19	TRAZODONE	150		DEPRESSION		mg	bid	Yes	PO	Yes	No	12_058	07JUL16	07JUL2016			12	Entered	68	Male	16NOV16	181	Placebo	<250 mg/day	Yes	Yes	<250 mg/day	No	Yes	Yes	Yes	Yes
20	DULOXETINE	60		DEPRESSION		mg	qd/od	Yes	PO	Yes	No	12_058	25JUL16	25JUL2016			12	Entered	68	Male	16NOV16	181	Placebo	<250 mg/day	Yes	Yes	<250 mg/day	No	Yes	Yes	Yes	Yes
21	VITAMIN D	50000	WEEKLY	VITAMIN D DEFICIENCY		IU	other (specify)	Yes	PO	Yes	No	12_058	28JUL16	28JUL2016			12	Entered	68	Male	16NOV16	181	Placebo	<250 mg/day	Yes	Yes	<250 mg/day	No	Yes	Yes	Yes	Yes
22	MUPIROCIN 2%	1		CHRONIC DERMATITIS		g	qid		top	No	No	12_058	29JUL16	29JUL2016		OCT2016	12	Entered	68	Male	16NOV16	181	Placebo	<250 mg/day	Yes	Yes	<250 mg/day	No	Yes	Yes	Yes	Yes
23	CELECOXIB	200		OSTEOARTHRITIS		mg	qd/od	Yes	PO	Yes	No	12_058	05OCT16	05OCT2016			12	Entered	68	Male	16NOV16	181	Placebo	<250 mg/day	Yes	Yes	<250 mg/day	No	Yes	Yes	Yes	Yes
24	AMMONIUM LACTATE 12%	1		DRY SKIN		g	qid	Yes	top	Yes	No	12_058	14OCT16	14OCT2016			12	Entered	68	Male	16NOV16	181	Placebo	<250 mg/day	Yes	Yes	<250 mg/day	No	Yes	Yes	Yes	Yes
25	VITAMIN B12	1000	WEEKLY	VITAMIN B12 DEFICIENCY		ug	other (specify)		IM	Yes	No	12_058	28JUL16	28JUL2016	28AUG16	28AUG2016	12	Entered	68	Male	16NOV16	181	Placebo	<250 mg/day	Yes	Yes	<250 mg/day	No	Yes	Yes	Yes	Yes
26	VITAMIN B12	1000	MONTHLY	VITAMIN B12 DEFICIENCY		ug	other (specify)	Yes	IM	Yes	No	12_058		SEP2016			12	Entered	68	Male	16NOV16	181	Placebo	<250 mg/day	Yes	Yes	<250 mg/day	No	Yes	Yes	Yes	Yes
1	GLIPIZIDE	30		DIABETES MELLITUS TYPE II		mg	qd/od	Yes	PO	Yes	No	12_062		JAN2016			12	Entered	53	Male	16NOV16	295	MF4637	<250 mg/day	Yes	No	<250 mg/day	No	Yes	Yes	Yes	Yes
2	METFORMIN	1000		DIABETES MELLITUS TYPE II		mg	bid	Yes	PO	Yes	No	12_062		2014			12	Entered	53	Male	16NOV16	295	MF4637	<250 mg/day	Yes	No	<250 mg/day	No	Yes	Yes	Yes	Yes
3	ATENOLOL	50		HYPERTENSION		mg	qod	Yes	PO	Yes	No	12_062		2010			12	Entered	53	Male	16NOV16	295	MF4637	<250 mg/day	Yes	No	<250 mg/day	No	Yes	Yes	Yes	Yes
4	LISINOPRIL	40		HYPERTENSION		mg	qd/od	Yes	PO	Yes	No	12_062		2015			12	Entered	53	Male	16NOV16	295	MF4637	<250 mg/day	Yes	No	<250 mg/day	No	Yes	Yes	Yes	Yes
5	ASPIRIN	81		CARDIOVASCULAR PROTECTOR		mg	qd/od	Yes	PO	Yes	No	12_062		2012			12	Entered	53	Male	16NOV16	295	MF4637	<250 mg/day	Yes	No	<250 mg/day	No	Yes	Yes	Yes	Yes
1	METFORMIN	500		DIABETES MELLITUS TYPE II		mg	bid	Yes	PO	Yes	No	12_065		2014			12	Entered	76	Female	16NOV16	182	MF4637	<250 mg/day	Yes	Yes	<250 mg/day	No	Yes	Yes	Yes	Yes
2	GLIMEPIRIDE	4		DIABETES MELLITUS TYPE II		mg	bid	Yes	PO	Yes	No	12_065		2015			12	Entered	76	Female	16NOV16	182	MF4637	<250 mg/day	Yes	Yes	<250 mg/day	No	Yes	Yes	Yes	Yes
3	METOPROLOL	50		HYPERTENSION		mg	qd/od	Yes	PO	Yes	No	12_065		2014			12	Entered	76	Female	16NOV16	182	MF4637	<250 mg/day	Yes	Yes	<250 mg/day	No	Yes	Yes	Yes	Yes
4	AMLODIPINE	10		HYPERTENSION		mg	qd/od	Yes	PO	Yes	No	12_065		2014			12	Entered	76	Female	16NOV16	182	MF4637	<250 mg/day	Yes	Yes	<250 mg/day	No	Yes	Yes	Yes	Yes
5	LEVOTHYROXINE	50		HYPOTHYROIDISM		ug	qd/od	Yes	PO	Yes	No	12_065		2008			12	Entered	76	Female	16NOV16	182	MF4637	<250 mg/day	Yes	Yes	<250 mg/day	No	Yes	Yes	Yes	Yes
6	SIMVASTATIN	40		DYSLIPIDEMIA		mg	qd/od	Yes	PO	Yes	No	12_065		2015			12	Entered	76	Female	16NOV16	182	MF4637	<250 mg/day	Yes	Yes	<250 mg/day	No	Yes	Yes	Yes	Yes
7	FLUTICASONE	50		ALLERGIC RHINITIS		ug	prn	Yes	inh	Yes	No	12_065		2015			12	Entered	76	Female	16NOV16	182	MF4637	<250 mg/day	Yes	Yes	<250 mg/day	No	Yes	Yes	Yes	Yes
8	RANITIDINE	150		GERD		mg	bid	Yes	PO	Yes	No	12_065		2015			12	Entered	76	Female	16NOV16	182	MF4637	<250 mg/day	Yes	Yes	<250 mg/day	No	Yes	Yes	Yes	Yes
9	DICYCLOMINE	10		IRRITABLE BOWEL SYNDROME		mg	bid	Yes	PO	Yes	No	12_065		2016			12	Entered	76	Female	16NOV16	182	MF4637	<250 mg/day	Yes	Yes	<250 mg/day	No	Yes	Yes	Yes	Yes
10	CITALOPRAM	10		DEPRESSION		mg	qd/od	Yes	PO	Yes	No	12_065		2015			12	Entered	76	Female	16NOV16	182	MF4637	<250 mg/day	Yes	Yes	<250 mg/day	No	Yes	Yes	Yes	Yes
11	CLONAZEPAM	0.5		ANXIETY		mg	bid	Yes	PO	Yes	No	12_065		2015			12	Entered	76	Female	16NOV16	182	MF4637	<250 mg/day	Yes	Yes	<250 mg/day	No	Yes	Yes	Yes	Yes
12	TRAMADOL	50		OSTEOARTHRITIS		mg	prn	Yes	PO	Yes	No	12_065		2016			12	Entered	76	Female	16NOV16	182	MF4637	<250 mg/day	Yes	Yes	<250 mg/day	No	Yes	Yes	Yes	Yes
13	GABAPENTIN	300		DIABETIC NEUROPATHY		mg	bid	Yes	PO	Yes	No	12_065		2015			12	Entered	76	Female	16NOV16	182	MF4637	<250 mg/day	Yes	Yes	<250 mg/day	No	Yes	Yes	Yes	Yes
14	VITAMIN D	50000	WEEKLY	VITAMIN D DEFICIENCY		IU	other (specify)	Yes	PO	Yes	No	12_065		2016			12	Entered	76	Female	16NOV16	182	MF4637	<250 mg/day	Yes	Yes	<250 mg/day	No	Yes	Yes	Yes	Yes
15	CLOBETASOL 0.05%	1		DERMATITIS OF THE HANDS		g	bid		top	No	No	12_065	04AUG16	04AUG2016		OCT2016	12	Entered	76	Female	16NOV16	182	MF4637	<250 mg/day	Yes	Yes	<250 mg/day	No	Yes	Yes	Yes	Yes
16	MUPIROCIN 2%	1		DERMATITIS OF THE HANDS		g	bid		top	No	No	12_065	04AUG16	04AUG2016		OCT2016	12	Entered	76	Female	16NOV16	182	MF4637	<250 mg/day	Yes	Yes	<250 mg/day	No	Yes	Yes	Yes	Yes
17	CLOTRIMAZOLE	1		DERMATOPHYTOSIS		g	bid		top	No	No	12_065	04AUG16	04AUG2016		OCT2016	12	Entered	76	Female	16NOV16	182	MF4637	<250 mg/day	Yes	Yes	<250 mg/day	No	Yes	Yes	Yes	Yes
1	GLIPIZIDE/METFORMIN	5/500		DIABETES MELLITUS TYPE II		mg	bid	Yes	PO	Yes	No	12_067		2015			12	Entered	72	Female	16NOV16	180	MF4637	>=250 mg/day	Yes	Yes	>=250 mg/day	No	Yes	Yes	Yes	Yes
2	LISINOPRIL	20		HYPERTENSION		mg	qd/od	Yes	PO	Yes	No	12_067		2005			12	Entered	72	Female	16NOV16	180	MF4637	>=250 mg/day	Yes	Yes	>=250 mg/day	No	Yes	Yes	Yes	Yes
3	ATORVASTATIN	40		DYSLIPIDEMIA		mg	qd/od	Yes	PO	Yes	No	12_067		2015			12	Entered	72	Female	16NOV16	180	MF4637	>=250 mg/day	Yes	Yes	>=250 mg/day	No	Yes	Yes	Yes	Yes
4	OMEPRAZOLE	20		GERD		mg	qd/od	Yes	PO	Yes	No	12_067		2015			12	Entered	72	Female	16NOV16	180	MF4637	>=250 mg/day	Yes	Yes	>=250 mg/day	No	Yes	Yes	Yes	Yes
5	ASPIRIN	81		CARDIOVASCULAR PROTECTOR		mg	qd/od	Yes	PO	Yes	No	12_067		2014			12	Entered	72	Female	16NOV16	180	MF4637	>=250 mg/day	Yes	Yes	>=250 mg/day	No	Yes	Yes	Yes	Yes
6	AMLODIPINE	10		HYPERTENSION		mg	qd/od		PO	No	No	12_067	29MAR15	29MAR2015		AUG2016	12	Entered	72	Female	16NOV16	180	MF4637	>=250 mg/day	Yes	Yes	>=250 mg/day	No	Yes	Yes	Yes	Yes
7	AZITHROMYCIN	250		UPPER RESPIRATORY TRACT INFECTION		mg	qd/od		PO	No	No	12_067	30DEC15	30DEC2015	04JAN16	04JAN2016	12	Entered	72	Female	16NOV16	180	MF4637	>=250 mg/day	Yes	Yes	>=250 mg/day	No	Yes	Yes	Yes	Yes
8	AZITHROMYCIN	250		UPPER RESPIRATORY TRACT INFECTION		mg	qd/od		PO	No	No	12_067	11MAR16	11MAR2016	16MAR16	16MAR2016	12	Entered	72	Female	16NOV16	180	MF4637	>=250 mg/day	Yes	Yes	>=250 mg/day	No	Yes	Yes	Yes	Yes
9	BACLOFEN	10		CHRONIC BACK PAIN		mg	qd/od		PO	No	No	12_067	03JUN16	03JUN2016		JUN2016	12	Entered	72	Female	16NOV16	180	MF4637	>=250 mg/day	Yes	Yes	>=250 mg/day	No	Yes	Yes	Yes	Yes
10	DICLOFENAC	50		OSTEOARTHRITIS		mg	bid		PO	No	No	12_067	23NOV15	23NOV2015		DEC2015	12	Entered	72	Female	16NOV16	180	MF4637	>=250 mg/day	Yes	Yes	>=250 mg/day	No	Yes	Yes	Yes	Yes
11	DICLOFENAC	50		OSTEOARTHRITIS		mg	bid		PO	No	No	12_067	22AUG16	22AUG2016	06SEP16	06SEP2016	12	Entered	72	Female	16NOV16	180	MF4637	>=250 mg/day	Yes	Yes	>=250 mg/day	No	Yes	Yes	Yes	Yes
12	DICLOFENAC	75		OSTEOARTHRITIS		mg	qd/od	Yes	PO	Yes	No	12_067	01NOV16	01NOV2016			12	Entered	72	Female	16NOV16	180	MF4637	>=250 mg/day	Yes	Yes	>=250 mg/day	No	Yes	Yes	Yes	Yes
13	CICLOPIROX 0.77%	1		TIENA PEDIS		g	qd/od		top	No	No	12_067	29AUG16	29AUG2016		SEP2016	12	Entered	72	Female	16NOV16	180	MF4637	>=250 mg/day	Yes	Yes	>=250 mg/day	No	Yes	Yes	Yes	Yes
14	CICLOPIROX 0.77%	1		TIENA PEDIS		g	bid		top	No	No	12_067	26SEP15	26SEP2015		OCT2015	12	Entered	72	Female	16NOV16	180	MF4637	>=250 mg/day	Yes	Yes	>=250 mg/day	No	Yes	Yes	Yes	Yes
15	CIPROFLOXACIN	500		SINUSITIS		mg	bid		PO	No	No	12_067	23MAY16	23MAY2016	30MAY16	30MAY2016	12	Entered	72	Female	16NOV16	180	MF4637	>=250 mg/day	Yes	Yes	>=250 mg/day	No	Yes	Yes	Yes	Yes
16	ERYTHROMYCIN	1		LEFT EYE CONJUNCTIVITIS		g	qd/od		eye	No	No	12_067	25MAR16	25MAR2016		APR2016	12	Entered	72	Female	16NOV16	180	MF4637	>=250 mg/day	Yes	Yes	>=250 mg/day	No	Yes	Yes	Yes	Yes
17	FLUTICASONE	50		ALLERGIC RHINITIS		ug	qd/od	Yes	IN	Yes	No	12_067	01NOV16	01NOV2016			12	Entered	72	Female	16NOV16	180	MF4637	>=250 mg/day	Yes	Yes	>=250 mg/day	No	Yes	Yes	Yes	Yes
18	GABAPENTIN	100		DIABETIC NEUROPATHY		mg	qd/od	Yes	PO	Yes	No	12_067	31AUG16	31AUG2016			12	Entered	72	Female	16NOV16	180	MF4637	>=250 mg/day	Yes	Yes	>=250 mg/day	No	Yes	Yes	Yes	Yes
19	TEMAZEPAM	30		INSOMNIA		mg	qd/od		PO	No	No	12_067	19NOV15	19NOV2015		JAN2016	12	Entered	72	Female	16NOV16	180	MF4637	>=250 mg/day	Yes	Yes	>=250 mg/day	No	Yes	Yes	Yes	Yes
20	TEMAZEPAM	30		INSOMNIA		mg	qd/od		PO	No	No	12_067	11MAR16	11MAR2016		APR2016	12	Entered	72	Female	16NOV16	180	MF4637	>=250 mg/day	Yes	Yes	>=250 mg/day	No	Yes	Yes	Yes	Yes
21	TOBRAMYCIN/DEXAMETHASONE	1		LEFT EYE CONJUNCTIVITIS		g	tid		eye	No	No	12_067	19NOV15	19NOV2015		NOV2015	12	Entered	72	Female	16NOV16	180	MF4637	>=250 mg/day	Yes	Yes	>=250 mg/day	No	Yes	Yes	Yes	Yes
22	TRAZODONE	50		INSOMNIA		mg	qd/od	Yes	PO	Yes	No	12_067	19AUG16	19AUG2016			12	Entered	72	Female	16NOV16	180	MF4637	>=250 mg/day	Yes	Yes	>=250 mg/day	No	Yes	Yes	Yes	Yes
23	HUMALOG	10	ONCE	DIABETES MELLITUS TYPE II		IU	other (specify)		SC	Yes	No	12_067	19AUG16	19AUG2016	19AUG16	19AUG2016	12	Entered	72	Female	16NOV16	180	MF4637	>=250 mg/day	Yes	Yes	>=250 mg/day	No	Yes	Yes	Yes	Yes
1	LOSARTAN POTASSIUM	100		HYPERTENSION		mg	qd/od	Yes	PO	Yes	No	12_068	20MAY16	20MAY2016			12	Entered	78	Female	21NOV16	183	Placebo	>=250 mg/day	Yes	Yes	>=250 mg/day	No	Yes	Yes	Yes	Yes
2	HYDROCHLOROTHIAZIDE	12.5		HYPERTENSION		mg	qd/od	Yes	PO	Yes	No	12_068	31MAY16	31MAY2016			12	Entered	78	Female	21NOV16	183	Placebo	>=250 mg/day	Yes	Yes	>=250 mg/day	No	Yes	Yes	Yes	Yes
3	METFORMIN	500		DIABETES MELLITUS TYPE II		mg	bid	Yes	PO	Yes	No	12_068		2015			12	Entered	78	Female	21NOV16	183	Placebo	>=250 mg/day	Yes	Yes	>=250 mg/day	No	Yes	Yes	Yes	Yes
4	GLIPIZIDE ER	5		DIABETES MELLITUS TYPE II		mg	bid	Yes	PO	Yes	No	12_068		2015			12	Entered	78	Female	21NOV16	183	Placebo	>=250 mg/day	Yes	Yes	>=250 mg/day	No	Yes	Yes	Yes	Yes
5	ATORVASTATIN	20		DYSLIPIDEMIA		mg	qd/od	Yes	PO	Yes	No	12_068		2015			12	Entered	78	Female	21NOV16	183	Placebo	>=250 mg/day	Yes	Yes	>=250 mg/day	No	Yes	Yes	Yes	Yes
6	OMEPRAZOLE	20		GASTROESOPHAGEAL RELFUX DISEASE		mg	qd/od	Yes	PO	Yes	No	12_068		2015			12	Entered	78	Female	21NOV16	183	Placebo	>=250 mg/day	Yes	Yes	>=250 mg/day	No	Yes	Yes	Yes	Yes
7	ALBUTEROL SULFATE	90		ASTHMA		ug	prn	Yes	inh	Yes	No	12_068		2015			12	Entered	78	Female	21NOV16	183	Placebo	>=250 mg/day	Yes	Yes	>=250 mg/day	No	Yes	Yes	Yes	Yes
8	VOLTAREN	1		KNEE PAIN		g	prn	Yes	top	Yes	No	12_068		2015			12	Entered	78	Female	21NOV16	183	Placebo	>=250 mg/day	Yes	Yes	>=250 mg/day	No	Yes	Yes	Yes	Yes
9	DONEPEZIL	5		MEMORY LOSS		mg	qd/od	Yes	PO	Yes	No	12_068		2015			12	Entered	78	Female	21NOV16	183	Placebo	>=250 mg/day	Yes	Yes	>=250 mg/day	No	Yes	Yes	Yes	Yes
10	ASPIRIN	81		CARDIOVASCULAR PROTECTOR		mg	qd/od	Yes	PO	Yes	No	12_068		2015			12	Entered	78	Female	21NOV16	183	Placebo	>=250 mg/day	Yes	Yes	>=250 mg/day	No	Yes	Yes	Yes	Yes
11	LUMIGAN 0.01%	1		GLAUCOMA		g	qd/od		eye	No	No	12_068		2015	25AUG16	25AUG2016	12	Entered	78	Female	21NOV16	183	Placebo	>=250 mg/day	Yes	Yes	>=250 mg/day	No	Yes	Yes	Yes	Yes
12	LATANOPROST 0.005%	1		GLAUCOMA		g	qd/od	Yes	eye	Yes	No	12_068	25AUG16	25AUG2016			12	Entered	78	Female	21NOV16	183	Placebo	>=250 mg/day	Yes	Yes	>=250 mg/day	No	Yes	Yes	Yes	Yes
13	GABAPENTIN	100		DIABETIC NEUROPATHY		mg	bid	Yes	PO	Yes	No	12_068		2015			12	Entered	78	Female	21NOV16	183	Placebo	>=250 mg/day	Yes	Yes	>=250 mg/day	No	Yes	Yes	Yes	Yes
14	REFRESH LIQUIDGEL SOLUTION 1%	1		DRY EYES		g	prn		eye	No	No	12_068	30AUG16	30AUG2016	29OCT16	29OCT2016	12	Entered	78	Female	21NOV16	183	Placebo	>=250 mg/day	Yes	Yes	>=250 mg/day	No	Yes	Yes	Yes	Yes
15	ONDANSETRON	4		NAUSEA		mg	prn		PO	No	No	12_068	02AUG16	02AUG2016		AUG2016	12	Entered	78	Female	21NOV16	183	Placebo	>=250 mg/day	Yes	Yes	>=250 mg/day	No	Yes	Yes	Yes	Yes
16	TYLENOL	650		KNEE PAIN		mg	prn		PO	No	No	12_068	31MAY16	31MAY2016	30AUG16	30AUG2016	12	Entered	78	Female	21NOV16	183	Placebo	>=250 mg/day	Yes	Yes	>=250 mg/day	No	Yes	Yes	Yes	Yes
17	POLYMYXIN B-TRIMETHOPRIM	1		RED EYES		g	tid		eye	No	No	12_068	30AUG16	30AUG2016		SEP2016	12	Entered	78	Female	21NOV16	183	Placebo	>=250 mg/day	Yes	Yes	>=250 mg/day	No	Yes	Yes	Yes	Yes
18	TOBRAMYCIN-DEXAMETHASONE	1		KERATITIS		g	tid		eye	No	No	12_068	20JUL16	20JUL2016	25AUG16	25AUG2016	12	Entered	78	Female	21NOV16	183	Placebo	>=250 mg/day	Yes	Yes	>=250 mg/day	No	Yes	Yes	Yes	Yes
19	AMLODIPINE	10		HYPERTENSION		mg	qd/od		PO	Yes	No	12_068		2015	20MAY16	20MAY2016	12	Entered	78	Female	21NOV16	183	Placebo	>=250 mg/day	Yes	Yes	>=250 mg/day	No	Yes	Yes	Yes	Yes
20	NAPROXEN	500		LUMBAR PAIN WITH LEFT SCIATALGIA		mg	bid		PO	No	No	12_068	12APR16	12APR2016		APR2016	12	Entered	78	Female	21NOV16	183	Placebo	>=250 mg/day	Yes	Yes	>=250 mg/day	No	Yes	Yes	Yes	Yes
21	KETOROLAC	60	ONCE	LUMBAR PAIN WITH LEFT SCIATALGIA		mg	other (specify)		IM	No	No	12_068	12APR16	12APR2016	12APR16	12APR2016	12	Entered	78	Female	21NOV16	183	Placebo	>=250 mg/day	Yes	Yes	>=250 mg/day	No	Yes	Yes	Yes	Yes
22	BENICAR	40		HYPERTENSION		mg	qd/od		PO	No	No	12_068		2015	20MAY16	20MAY2016	12	Entered	78	Female	21NOV16	183	Placebo	>=250 mg/day	Yes	Yes	>=250 mg/day	No	Yes	Yes	Yes	Yes
1	Metformin	850		Type II DM		mg	tid	Yes	PO	Yes	No	13_002		03UNK2003			13	Entered	67	Female	20OCT16	204	MF4637	<250 mg/day	Yes	Yes	<250 mg/day	No	Yes	Yes	Yes	Yes
2	Glipizide	10		Type II DM		mg	bid	Yes	PO	Yes	No	13_002		05UNK2015			13	Entered	67	Female	20OCT16	204	MF4637	<250 mg/day	Yes	Yes	<250 mg/day	No	Yes	Yes	Yes	Yes
3	Glucosamida y Sulfato de Glucosamida	500		Osteoarthritis		mg	bid	Yes	PO	Yes	No	13_002		07UNK2014			13	Entered	67	Female	20OCT16	204	MF4637	<250 mg/day	Yes	Yes	<250 mg/day	No	Yes	Yes	Yes	Yes
4	Atorvastatin	40		Dyslipidemia		mg	bid	Yes	PO	Yes	No	13_002		AUG2016			13	Entered	67	Female	20OCT16	204	MF4637	<250 mg/day	Yes	Yes	<250 mg/day	No	Yes	Yes	Yes	Yes
1	Aspirin	81		Prophylactic		mg	qd/od	Yes	PO	Yes	No	13_003		JUL2015			13	Entered	65	Female	20OCT16	205	Placebo	<250 mg/day	Yes	Yes	<250 mg/day	No	Yes	Yes	Yes	Yes
2	Metformin	500		Type II Diabetes		mg	qd/od	Yes	PO	Yes	No	13_003		FEB2016			13	Entered	65	Female	20OCT16	205	Placebo	<250 mg/day	Yes	Yes	<250 mg/day	No	Yes	Yes	Yes	Yes
3	Simvastatin	40		Dyslipidemia		mg	qd/od	Yes	PO	Yes	No	13_003		FEB2016			13	Entered	65	Female	20OCT16	205	Placebo	<250 mg/day	Yes	Yes	<250 mg/day	No	Yes	Yes	Yes	Yes
4	Levothyroxine	50		Elevated TSH	1	mg	qd/od	Yes	PO	No	Yes	13_003	09MAY17	09MAY2017			13	Entered	65	Female	20OCT16	205	Placebo	<250 mg/day	Yes	Yes	<250 mg/day	No	Yes	Yes	Yes	Yes
5	Levothyroxine	50		Hypothyroidism	2	mg	qd/od	Yes	PO	No	Yes	13_003	09MAY17	09MAY2017			13	Entered	65	Female	20OCT16	205	Placebo	<250 mg/day	Yes	Yes	<250 mg/day	No	Yes	Yes	Yes	Yes
1	Hydrochlorotiazide	25		High Blood Pressure		mg	qd/od	Yes	PO	Yes	No	13_004		2009			13	Entered	69	Female	20OCT16	206	MF4637	<250 mg/day	No	Yes	<250 mg/day	No	Yes	Yes	Yes	Yes
2	Atorvastatin	10		Dyslipidemia		mg	qd/od	Yes	PO	Yes	No	13_004		MAR2016			13	Entered	69	Female	20OCT16	206	MF4637	<250 mg/day	No	Yes	<250 mg/day	No	Yes	Yes	Yes	Yes
1	Lisinopril	10		Hypertension		mg	qd/od	Yes	PO	Yes	No	13_008		2012			13	Screen Failure	67	Male								Yes	No	No	No	No
2	Metformin	500		Type II DM		mg	qd/od	Yes	PO	Yes	No	13_008		2012			13	Screen Failure	67	Male								Yes	No	No	No	No
1	Enalapril	5		Hypertension		mg	qd/od	Yes	PO	Yes	No	13_009		2006			13	Entered	51	Male	05NOV16	267	Placebo	<250 mg/day	No	Yes	>=250 mg/day	No	Yes	Yes	Yes	Yes
2	Atorvastatin	20		Dyslipidemia		mg	qd/od	Yes	PO	Yes	No	13_009		FEB2016			13	Entered	51	Male	05NOV16	267	Placebo	<250 mg/day	No	Yes	>=250 mg/day	No	Yes	Yes	Yes	Yes
1	Levothyrosine	50		Hypothyroidism		mg	qd/od	Yes	PO	Yes	No	13_014		2012			13	Entered	71	Female	03NOV16	266	Placebo	<250 mg/day	No	Yes	<250 mg/day	No	Yes	Yes	Yes	Yes
2	Lisinopril	20		Hypertension		mg	qd/od	Yes	PO	Yes	No	13_014		2006			13	Entered	71	Female	03NOV16	266	Placebo	<250 mg/day	No	Yes	<250 mg/day	No	Yes	Yes	Yes	Yes
3	Atenolol	100		Hypertension		mg	qd/od	Yes	PO	Yes	No	13_014		2006			13	Entered	71	Female	03NOV16	266	Placebo	<250 mg/day	No	Yes	<250 mg/day	No	Yes	Yes	Yes	Yes
4	Metoclopramide	10		Reflux		mg	prn	Yes	PO	Yes	No	13_014		2012			13	Entered	71	Female	03NOV16	266	Placebo	<250 mg/day	No	Yes	<250 mg/day	No	Yes	Yes	Yes	Yes
1	Alopurinol	100		Gout		mg	qd/od	Yes	PO	Yes	No	13_015		2013			13	Entered	75	Male	03NOV16	264	MF4637	<250 mg/day	No	Yes	<250 mg/day	No	Yes	Yes	Yes	Yes
2	Linsinopril	20		Hypertension		mg	qd/od	Yes	PO	Yes	No	13_015		2005			13	Entered	75	Male	03NOV16	264	MF4637	<250 mg/day	No	Yes	<250 mg/day	No	Yes	Yes	Yes	Yes
3	Atenolol	100		Hypertension		mg	qd/od	Yes	PO	Yes	No	13_015		2005			13	Entered	75	Male	03NOV16	264	MF4637	<250 mg/day	No	Yes	<250 mg/day	No	Yes	Yes	Yes	Yes
4	Glucosamine	NA		Nutritional supplement		tab	qd/od	Yes	PO	Yes	No	13_015	16NOV16	16NOV2016			13	Entered	75	Male	03NOV16	264	MF4637	<250 mg/day	No	Yes	<250 mg/day	No	Yes	Yes	Yes	Yes
5	Vitamin C	500		Nutritional supplement		mg	qd/od	Yes	PO	Yes	No	13_015	16NOV16	16NOV2016			13	Entered	75	Male	03NOV16	264	MF4637	<250 mg/day	No	Yes	<250 mg/day	No	Yes	Yes	Yes	Yes
6	Pepto-Bismol	30		Diarrhea	1	mL	qd/od		PO	Yes	Yes	13_015	30DEC16	30DEC2016	31DEC16	31DEC2016	13	Entered	75	Male	03NOV16	264	MF4637	<250 mg/day	No	Yes	<250 mg/day	No	Yes	Yes	Yes	Yes
1	Diclofenac Potasium	50		Osteoarthritis		mg	prn	Yes	PO	Yes	No	13_016		2011			13	Entered	70	Female	28OCT16	163	Placebo	<250 mg/day	No	Yes	>=250 mg/day	No	Yes	Yes	Yes	Yes
2	Lisinopril	20		Hypertension		mg	qd/od	Yes	PO	Yes	No	13_016		2010			13	Entered	70	Female	28OCT16	163	Placebo	<250 mg/day	No	Yes	>=250 mg/day	No	Yes	Yes	Yes	Yes
3	Hydrochlorotiazide	25		Hypertension		mg	qd/od	Yes	PO	Yes	No	13_016		2010			13	Entered	70	Female	28OCT16	163	Placebo	<250 mg/day	No	Yes	>=250 mg/day	No	Yes	Yes	Yes	Yes
4	Vitamin D3	NA		Nutricional Suplement			qd/od	Yes	PO	Yes	No	13_016		2011			13	Entered	70	Female	28OCT16	163	Placebo	<250 mg/day	No	Yes	>=250 mg/day	No	Yes	Yes	Yes	Yes
5	Simvastatin	20		Dyslipidemia		mg	qd/od	Yes	PO	Yes	No	13_016		AUG2015			13	Entered	70	Female	28OCT16	163	Placebo	<250 mg/day	No	Yes	>=250 mg/day	No	Yes	Yes	Yes	Yes
1	Nifedipine	60		Hypertension		mg	qd/od	Yes	PO	Yes	No	13_017		2011			13	Entered	52	Female	03NOV16	265	MF4637	<250 mg/day	Yes	Yes	>=250 mg/day	No	Yes	Yes	Yes	Yes
2	Glipizide	10		Type II Diabetes		mg	bid	Yes	PO	Yes	No	13_017		AUG2015			13	Entered	52	Female	03NOV16	265	MF4637	<250 mg/day	Yes	Yes	>=250 mg/day	No	Yes	Yes	Yes	Yes
3	Tradjenta	5		Type II Diabetes		mg	qd/od	Yes	PO	Yes	No	13_017		AUG2015			13	Entered	52	Female	03NOV16	265	MF4637	<250 mg/day	Yes	Yes	>=250 mg/day	No	Yes	Yes	Yes	Yes
4	Simvastatin	20		Dyslipidemia		mg	qd/od	Yes	PO	Yes	No	13_017		JAN2016			13	Entered	52	Female	03NOV16	265	MF4637	<250 mg/day	Yes	Yes	>=250 mg/day	No	Yes	Yes	Yes	Yes
5	Omeprazole	20		Reflux		mg	qd/od	Yes	PO	Yes	No	13_017		JAN2016			13	Entered	52	Female	03NOV16	265	MF4637	<250 mg/day	Yes	Yes	>=250 mg/day	No	Yes	Yes	Yes	Yes
1	Lipitor	20		cholesterol		mg	prn	Yes	PO	Yes	No	14_001	15NOV10	15NOV2010			14	Entered	61	Male	25OCT16	185	Placebo	>=250 mg/day	No	Yes	>=250 mg/day	No	Yes	Yes	Yes	Yes
2	Lycopene	50		preventative prostate		mg	qd/od	Yes	PO	Yes	No	14_001	15NOV10	15NOV2010			14	Entered	61	Male	25OCT16	185	Placebo	>=250 mg/day	No	Yes	>=250 mg/day	No	Yes	Yes	Yes	Yes
3	Saw Palmetto	100		preventative prostate		mg	qd/od		PO	No	No	14_001	15NOV10	15NOV2010	18SEP16	18SEP2016	14	Entered	61	Male	25OCT16	185	Placebo	>=250 mg/day	No	Yes	>=250 mg/day	No	Yes	Yes	Yes	Yes
4	Valium	10		panic attack (do to Claustrophobia)	2	mg	qd/od		PO	Yes	Yes	14_001	13APR17	13APR2017	13APR17	13APR2017	14	Entered	61	Male	25OCT16	185	Placebo	>=250 mg/day	No	Yes	>=250 mg/day	No	Yes	Yes	Yes	Yes
1	Losartan	50		Blood pressure		mg	qd/od	Yes	PO	Yes	No	14_002	16SEP15	16SEP2015			14	Entered	44	Female	12OCT16	208	MF4637	<250 mg/day	No	Yes	>=250 mg/day	No	Yes	Yes	Yes	Yes
2	Amlodipine Besylates	1		Hypertension		tab	qd/od		PO	Yes	No	14_002	16SEP16	16SEP2016	07MAR17	07MAR2017	14	Entered	44	Female	12OCT16	208	MF4637	<250 mg/day	No	Yes	>=250 mg/day	No	Yes	Yes	Yes	Yes
3	Metronidazole	1	Q12H	Flu	1	tab	other (specify)		PO	Yes	Yes	14_002	31DEC16	31DEC2016	09JAN17	09JAN2017	14	Entered	44	Female	12OCT16	208	MF4637	<250 mg/day	No	Yes	>=250 mg/day	No	Yes	Yes	Yes	Yes
4	Ciprofloxacin	1		Flu	1	tab	bid		PO	Yes	Yes	14_002	31DEC16	31DEC2016	09JAN17	09JAN2017	14	Entered	44	Female	12OCT16	208	MF4637	<250 mg/day	No	Yes	>=250 mg/day	No	Yes	Yes	Yes	Yes
1	Green Tea (cup)	1		supplement			prn	Yes	PO	Yes	No	14_010	01MAY00	01MAY2000			14	Early Termination	61	Female		184	MF4637	<250 mg/day	No	No	>=250 mg/day	No	No	Yes	No	No
2	Camomile Tea (cup)	1		supplement			qd/od	Yes	PO	Yes	No	14_010	01MAY00	01MAY2000			14	Early Termination	61	Female		184	MF4637	<250 mg/day	No	No	>=250 mg/day	No	No	Yes	No	No
3	Collagen + C	5000		supplement		mg	prn		PO	Yes	No	14_010	15SEP16	15SEP2016	12OCT16	12OCT2016	14	Early Termination	61	Female		184	MF4637	<250 mg/day	No	No	>=250 mg/day	No	No	Yes	No	No
1	Tylenol	250		headache		mg	prn	Yes	PO	No	No	14_012	01FEB00	01FEB2000			14	Early Termination	34	Male	15NOV16	186	Placebo	<250 mg/day	No	No	>=250 mg/day	No	Yes	Yes	Yes	Yes
2	Tylenol cold and flu	2		common cold	1	tab	prn		PO	Yes	Yes	14_012	02NOV16	02NOV2016	09NOV16	09NOV2016	14	Early Termination	34	Male	15NOV16	186	Placebo	<250 mg/day	No	No	>=250 mg/day	No	Yes	Yes	Yes	Yes
1	ibuprofen	400		stress headaches		mg	prn	Yes	PO	Yes	No	14_014	03AUG08	03AUG2008			14	Entered	33	Female	16NOV16	187	MF4637	<250 mg/day	No	No	>=250 mg/day	No	Yes	Yes	Yes	Yes
2	Oseltamvin	75		Common cold	1	mg	qd/od		PO	Yes	Yes	14_014	01FEB17	01FEB2017	05FEB17	05FEB2017	14	Entered	33	Female	16NOV16	187	MF4637	<250 mg/day	No	No	>=250 mg/day	No	Yes	Yes	Yes	Yes
1	Zyrtec	1		Allergies		tab	prn	Yes	PO	Yes	No	14_016	01MAY11	01MAY2011			14	Entered	51	Female	01DEC16	209	Placebo	<250 mg/day	No	No	<250 mg/day	No	Yes	Yes	Yes	Yes
2	Tylenol	250		Headaches		mg	prn	Yes	PO	Yes	No	14_016	01JUN00	01JUN2000			14	Entered	51	Female	01DEC16	209	Placebo	<250 mg/day	No	No	<250 mg/day	No	Yes	Yes	Yes	Yes
3	Macrobid	100		fecal incontinence/sphincteroplasty	1	mg	tid		PO	Yes	Yes	14_016	16MAR17	16MAR2017	21MAR17	21MAR2017	14	Entered	51	Female	01DEC16	209	Placebo	<250 mg/day	No	No	<250 mg/day	No	Yes	Yes	Yes	Yes
4	Metrogel vaginal	1	qd for 5days	fecal incontinence/sphincteroplasty	1	cap	other (specify)		vag	Yes	Yes	14_016	05MAY17	05MAY2017	07MAY17	07MAY2017	14	Entered	51	Female	01DEC16	209	Placebo	<250 mg/day	No	No	<250 mg/day	No	Yes	Yes	Yes	Yes
1	Hydrochlorothazide	12.5		Blood Pressure		mg	qd/od	Yes	PO	Yes	No	14_019	01JUN16	01JUN2016			14	Entered	32	Male	03DEC16	211	Placebo	<250 mg/day	No	Yes	<250 mg/day	No	Yes	Yes	Yes	Yes
2	Cyclobenzaprine	7.5		lower back pain		mg	prn	Yes	PO	Yes	No	14_019	01OCT16	01OCT2016			14	Entered	32	Male	03DEC16	211	Placebo	<250 mg/day	No	Yes	<250 mg/day	No	Yes	Yes	Yes	Yes
3	Gabapentin	300		lower back pain		mg	prn	Yes	PO	Yes	No	14_019	01OCT16	01OCT2016			14	Entered	32	Male	03DEC16	211	Placebo	<250 mg/day	No	Yes	<250 mg/day	No	Yes	Yes	Yes	Yes
4	Tramadol	15		lower back pain		mg	prn	Yes	PO	Yes	No	14_019	01OCT16	01OCT2016			14	Entered	32	Male	03DEC16	211	Placebo	<250 mg/day	No	Yes	<250 mg/day	No	Yes	Yes	Yes	Yes
1	Lisinopril	20		Hypertension		mg	qd/od	Yes	PO	Yes	No	15_002	16OCT16	16OCT2016			15	Entered	67	Male	27SEP16	149	Placebo	<250 mg/day	No	No	<250 mg/day	No	Yes	Yes	Yes	Yes
1	Simvastatin	20		Cholesterole		mg	qd/od	Yes	PO	Yes	No	15_005	01MAR16	01MAR2016			15	Entered	58	Male	28SEP16	150	Placebo	<250 mg/day	No	No	>=250 mg/day	No	Yes	Yes	Yes	Yes
2	Aspirin	81		Peripheralvascular Disease		mg	qd/od	Yes	PO	Yes	No	15_005	01MAR16	01MAR2016			15	Entered	58	Male	28SEP16	150	Placebo	<250 mg/day	No	No	>=250 mg/day	No	Yes	Yes	Yes	Yes
1	Nexium	40		GERD		mg	qd/od	Yes	PO	Yes	No	15_007	16SEP16	16SEP2016			15	Entered	74	Male	29SEP16	236	Placebo	<250 mg/day	No	No	>=250 mg/day	No	Yes	Yes	Yes	Yes
2	Tramadol	50		Analgesic		mg	qd/od	Yes	PO	Yes	No	15_007	08NOV15	08NOV2015			15	Entered	74	Male	29SEP16	236	Placebo	<250 mg/day	No	No	>=250 mg/day	No	Yes	Yes	Yes	Yes
3	Ambien	10		Anxiety		mg	qd/od	Yes	PO	Yes	No	15_007	31MAY16	31MAY2016			15	Entered	74	Male	29SEP16	236	Placebo	<250 mg/day	No	No	>=250 mg/day	No	Yes	Yes	Yes	Yes
4	Crestor	40		Hypercholesterol		mg	qd/od	Yes	PO	Yes	No	15_007	30MAR16	30MAR2016			15	Entered	74	Male	29SEP16	236	Placebo	<250 mg/day	No	No	>=250 mg/day	No	Yes	Yes	Yes	Yes
5	Carisoprodol	350		Hypertension		mg	qd/od	Yes	PO	Yes	No	15_007	29APR16	29APR2016			15	Entered	74	Male	29SEP16	236	Placebo	<250 mg/day	No	No	>=250 mg/day	No	Yes	Yes	Yes	Yes
6	Omega 3 Fish Oil	1		Hyperlipidemia		g	bid		PO	No	No	15_007	31JAN16	31JAN2016	05MAR16	05MAR2016	15	Entered	74	Male	29SEP16	236	Placebo	<250 mg/day	No	No	>=250 mg/day	No	Yes	Yes	Yes	Yes
7	Gabapentin	50		pheripheral neuropathy		mg	qd/od	Yes	PO	Yes	No	15_007	22JAN17	22JAN2017			15	Entered	74	Male	29SEP16	236	Placebo	<250 mg/day	No	No	>=250 mg/day	No	Yes	Yes	Yes	Yes
1	Clopidogrel	75		Anticoagulant		mg	qd/od	Yes	PO	Yes	No	15_008	01FEB16	01FEB2016			15	Entered	55	Male	28SEP16	151	MF4637	<250 mg/day	No	No	<250 mg/day	No	Yes	Yes	Yes	Yes
2	Carvedilol	25		Hypertension		mg	qd/od	Yes	PO	Yes	No	15_008	01FEB16	01FEB2016			15	Entered	55	Male	28SEP16	151	MF4637	<250 mg/day	No	No	<250 mg/day	No	Yes	Yes	Yes	Yes
3	Chlortalidone	25		Hypertension		mg	qd/od	Yes	PO	Yes	No	15_008	01FEB16	01FEB2016			15	Entered	55	Male	28SEP16	151	MF4637	<250 mg/day	No	No	<250 mg/day	No	Yes	Yes	Yes	Yes
4	Losartan	50		Hypertension		mg	qd/od	Yes	PO	Yes	No	15_008	01JUL15	01JUL2015			15	Entered	55	Male	28SEP16	151	MF4637	<250 mg/day	No	No	<250 mg/day	No	Yes	Yes	Yes	Yes
5	Pentoxifylline	400		Peripheral Vascula disease		mg	qd/od	Yes	PO	Yes	No	15_008	01JUL16	01JUL2016			15	Entered	55	Male	28SEP16	151	MF4637	<250 mg/day	No	No	<250 mg/day	No	Yes	Yes	Yes	Yes
6	Gabapentin	300		Peripheral neuropathy		mg	bid	Yes	PO	Yes	No	15_008	01JUN16	01JUN2016			15	Entered	55	Male	28SEP16	151	MF4637	<250 mg/day	No	No	<250 mg/day	No	Yes	Yes	Yes	Yes
7	Atorvastatin	40		Cholesterol		mg	qd/od	Yes	PO	Yes	No	15_008	01JUL15	01JUL2015			15	Entered	55	Male	28SEP16	151	MF4637	<250 mg/day	No	No	<250 mg/day	No	Yes	Yes	Yes	Yes
8	Furosemide	40		Hypertension		mg	qd/od	Yes	PO	Yes	No	15_008	01FEB16	01FEB2016			15	Entered	55	Male	28SEP16	151	MF4637	<250 mg/day	No	No	<250 mg/day	No	Yes	Yes	Yes	Yes
9	Allopurinol	300		Hyperuricemia		mg	bid	Yes	PO	Yes	No	15_008	01JUN16	01JUN2016			15	Entered	55	Male	28SEP16	151	MF4637	<250 mg/day	No	No	<250 mg/day	No	Yes	Yes	Yes	Yes
10	Escitalopram	10		Depression		mg	qd/od	Yes	PO	Yes	No	15_008	01JUN16	01JUN2016			15	Entered	55	Male	28SEP16	151	MF4637	<250 mg/day	No	No	<250 mg/day	No	Yes	Yes	Yes	Yes
11	Lantus	10		Diabetes Mellitus		IU	qd/od	Yes	SC	Yes	No	15_008	01APR15	01APR2015			15	Entered	55	Male	28SEP16	151	MF4637	<250 mg/day	No	No	<250 mg/day	No	Yes	Yes	Yes	Yes
12	Cilostazol	100		Peripheral vascular disease		mg	bid	Yes	PO	Yes	No	15_008	01APR15	01APR2015			15	Entered	55	Male	28SEP16	151	MF4637	<250 mg/day	No	No	<250 mg/day	No	Yes	Yes	Yes	Yes
1	gabapentin	300		Peripheral neuropathy		mg	bid	Yes	PO	Yes	No	15_009	02SEP16	02SEP2016			15	Entered	70	Female	10OCT16	237	MF4637	<250 mg/day	No	No	<250 mg/day	No	Yes	Yes	Yes	Yes
2	omeprazole	20		GERD		mg	qd/od	Yes	PO	Yes	No	15_009	02SEP16	02SEP2016			15	Entered	70	Female	10OCT16	237	MF4637	<250 mg/day	No	No	<250 mg/day	No	Yes	Yes	Yes	Yes
3	Nasonex	0.5		Rhinitis		mg	qd/od	Yes	inh	Yes	No	15_009	30SEP16	30SEP2016			15	Entered	70	Female	10OCT16	237	MF4637	<250 mg/day	No	No	<250 mg/day	No	Yes	Yes	Yes	Yes
4	metoprolol	25		hypertension		mg	qd/od	Yes	PO	Yes	No	15_009	30SEP16	30SEP2016			15	Entered	70	Female	10OCT16	237	MF4637	<250 mg/day	No	No	<250 mg/day	No	Yes	Yes	Yes	Yes
5	hydrochlorotiazide	25		hypertension		mg	qd/od	Yes	PO	Yes	No	15_009	30SEP16	30SEP2016			15	Entered	70	Female	10OCT16	237	MF4637	<250 mg/day	No	No	<250 mg/day	No	Yes	Yes	Yes	Yes
6	voltaren	1		osteoarthritis		IU	bid	Yes	PO	Yes	No	15_009	01OCT16	01OCT2016			15	Entered	70	Female	10OCT16	237	MF4637	<250 mg/day	No	No	<250 mg/day	No	Yes	Yes	Yes	Yes
7	simvastatin	20		hypercholesterolemia		mg	qd/od	Yes	PO	Yes	No	15_009	03NOV16	03NOV2016			15	Entered	70	Female	10OCT16	237	MF4637	<250 mg/day	No	No	<250 mg/day	No	Yes	Yes	Yes	Yes
1	Losartan	12.5		HTN		mg	qd/od	Yes	PO	Yes	No	15_010	01MAY03	01MAY2003			15	Entered	64	Female	11OCT16	238	Placebo	<250 mg/day	No	No	<250 mg/day	No	Yes	Yes	Yes	Yes
2	Omeprazole	20		GERD		mg	qd/od	Yes	PO	Yes	No	15_010	26MAY15	26MAY2015			15	Entered	64	Female	11OCT16	238	Placebo	<250 mg/day	No	No	<250 mg/day	No	Yes	Yes	Yes	Yes
3	Clonazepan	2		Insomnia		mg	qd/od	Yes	PO	Yes	No	15_010	01DEC14	01DEC2014			15	Entered	64	Female	11OCT16	238	Placebo	<250 mg/day	No	No	<250 mg/day	No	Yes	Yes	Yes	Yes
4	Seroquel	300		Depression		mg	qd/od	Yes	PO	Yes	No	15_010	02FEB15	02FEB2015			15	Entered	64	Female	11OCT16	238	Placebo	<250 mg/day	No	No	<250 mg/day	No	Yes	Yes	Yes	Yes
5	Sentraline	150		Depression		mg	qd/od	Yes	PO	Yes	No	15_010	02FEB15	02FEB2015			15	Entered	64	Female	11OCT16	238	Placebo	<250 mg/day	No	No	<250 mg/day	No	Yes	Yes	Yes	Yes
6	Tylenol	1000		Pain in knee		mg	qd/od	Yes	PO	Yes	No	15_010	01DEC15	01DEC2015			15	Entered	64	Female	11OCT16	238	Placebo	<250 mg/day	No	No	<250 mg/day	No	Yes	Yes	Yes	Yes
1	Lantus	62		Diabetes Mellitus		IU	qd/od	Yes	SC	Yes	No	15_011	01SEP16	01SEP2016			15	Entered	66	Male	13OCT16	240	Placebo	<250 mg/day	No	No	<250 mg/day	No	Yes	Yes	Yes	Yes
2	Folic Acid	1		Supplement		mg	qd/od	Yes	PO	Yes	No	15_011	03NOV14	03NOV2014			15	Entered	66	Male	13OCT16	240	Placebo	<250 mg/day	No	No	<250 mg/day	No	Yes	Yes	Yes	Yes
3	Dyclomine	10		GERD		mg	qd/od	Yes	PO	Yes	No	15_011	01JUN16	01JUN2016			15	Entered	66	Male	13OCT16	240	Placebo	<250 mg/day	No	No	<250 mg/day	No	Yes	Yes	Yes	Yes
4	Diclofenac	75		Osteoarthritis		mg	qd/od	Yes	PO	Yes	No	15_011	02MAR15	02MAR2015			15	Entered	66	Male	13OCT16	240	Placebo	<250 mg/day	No	No	<250 mg/day	No	Yes	Yes	Yes	Yes
5	Metformin	1000		Diabetes Mellitus		mg	qd/od	Yes	PO	Yes	No	15_011	01SEP16	01SEP2016			15	Entered	66	Male	13OCT16	240	Placebo	<250 mg/day	No	No	<250 mg/day	No	Yes	Yes	Yes	Yes
6	Losartan	100-12.5		HTN		mg	qd/od	Yes	PO	Yes	No	15_011	03NOV14	03NOV2014			15	Entered	66	Male	13OCT16	240	Placebo	<250 mg/day	No	No	<250 mg/day	No	Yes	Yes	Yes	Yes
7	Potassium	10		HTN		mg	qd/od	Yes	PO	Yes	No	15_011	01JUL15	01JUL2015			15	Entered	66	Male	13OCT16	240	Placebo	<250 mg/day	No	No	<250 mg/day	No	Yes	Yes	Yes	Yes
8	Sentraline	100		Depression		mg	qd/od	Yes	PO	Yes	No	15_011	01SEP14	01SEP2014			15	Entered	66	Male	13OCT16	240	Placebo	<250 mg/day	No	No	<250 mg/day	No	Yes	Yes	Yes	Yes
1	Omeprazole	20		GERD		mg	qd/od	Yes	PO	Yes	No	15_012	01MAY15	01MAY2015			15	Entered	54	Female	19OCT16	241	Placebo	<250 mg/day	No	No	<250 mg/day	No	Yes	Yes	Yes	Yes
2	Aspirin	81		CAD		mg	qd/od	Yes	PO	Yes	No	15_012	01JUL15	01JUL2015			15	Entered	54	Female	19OCT16	241	Placebo	<250 mg/day	No	No	<250 mg/day	No	Yes	Yes	Yes	Yes
3	Metoprolol	50		HTN		mg	qd/od	Yes	PO	Yes	No	15_012	01NOV15	01NOV2015			15	Entered	54	Female	19OCT16	241	Placebo	<250 mg/day	No	No	<250 mg/day	No	Yes	Yes	Yes	Yes
4	Paroxetine	25		Depression		mg	qd/od	Yes	PO	Yes	No	15_012	01DEC15	01DEC2015			15	Entered	54	Female	19OCT16	241	Placebo	<250 mg/day	No	No	<250 mg/day	No	Yes	Yes	Yes	Yes
5	Simvastatin	40		Hyperlipidemia		mg	qd/od	Yes	PO	Yes	No	15_012	01JUL15	01JUL2015			15	Entered	54	Female	19OCT16	241	Placebo	<250 mg/day	No	No	<250 mg/day	No	Yes	Yes	Yes	Yes
1	Metocarbamol	500		Oateoarthritis		mg	bid	Yes	PO	Yes	No	15_014	01MAR16	01MAR2016			15	Entered	55	Female	13OCT16	239	MF4637	<250 mg/day	No	No	>=250 mg/day	No	Yes	Yes	Yes	Yes
2	Ibuprofen	800		Osteoarthritis		mg	bid	Yes	PO	Yes	No	15_014	01MAR16	01MAR2016			15	Entered	55	Female	13OCT16	239	MF4637	<250 mg/day	No	No	>=250 mg/day	No	Yes	Yes	Yes	Yes
1	Omeprazole	20		gastritis		mg	qd/od	Yes	PO	Yes	No	15_015	15MAY15	15MAY2015			15	Entered	81	Female	09NOV16	268	MF4637	<250 mg/day	No	No	<250 mg/day	No	Yes	Yes	Yes	Yes
2	Aspirin	81		anticoagulant		mg	qd/od	Yes	PO	Yes	No	15_015	01JUL15	01JUL2015			15	Entered	81	Female	09NOV16	268	MF4637	<250 mg/day	No	No	<250 mg/day	No	Yes	Yes	Yes	Yes
3	metoprolol	50		Hypertension		mg	qd/od	Yes	PO	Yes	No	15_015	02NOV15	02NOV2015			15	Entered	81	Female	09NOV16	268	MF4637	<250 mg/day	No	No	<250 mg/day	No	Yes	Yes	Yes	Yes
4	Paroxetine	25		antidepressive		mg	qd/od	Yes	PO	Yes	No	15_015	01DEC15	01DEC2015			15	Entered	81	Female	09NOV16	268	MF4637	<250 mg/day	No	No	<250 mg/day	No	Yes	Yes	Yes	Yes
5	simvastatin	40		colesterol		mg	qd/od	Yes	PO	Yes	No	15_015	01JUL15	01JUL2015			15	Entered	81	Female	09NOV16	268	MF4637	<250 mg/day	No	No	<250 mg/day	No	Yes	Yes	Yes	Yes
1	Amlodipine	5		hypertension		mg	qd/od	Yes	PO	Yes	No	15_016	01SEP16	01SEP2016			15	Entered	77	Female	09NOV16	243	MF4637	<250 mg/day	Yes	No	>=250 mg/day	No	Yes	Yes	Yes	Yes
2	Clopidogrel	75		CAD		mg	qd/od	Yes	PO	Yes	No	15_016	01SEP16	01SEP2016			15	Entered	77	Female	09NOV16	243	MF4637	<250 mg/day	Yes	No	>=250 mg/day	No	Yes	Yes	Yes	Yes
3	Diclofenac	50		Osteoarthritis		mg	bid	Yes	PO	Yes	No	15_016	01MAY16	01MAY2016			15	Entered	77	Female	09NOV16	243	MF4637	<250 mg/day	Yes	No	>=250 mg/day	No	Yes	Yes	Yes	Yes
4	Dicyclomine	10		GERD		mg	bid	Yes	PO	Yes	No	15_016	01OCT15	01OCT2015			15	Entered	77	Female	09NOV16	243	MF4637	<250 mg/day	Yes	No	>=250 mg/day	No	Yes	Yes	Yes	Yes
5	Januvia	100		Diabetes Mellitus		mg	qd/od	Yes	PO	Yes	No	15_016	01MAY16	01MAY2016			15	Entered	77	Female	09NOV16	243	MF4637	<250 mg/day	Yes	No	>=250 mg/day	No	Yes	Yes	Yes	Yes
6	Loratadine	10		Allergy		mg	qd/od	Yes	PO	Yes	No	15_016	01SEP16	01SEP2016			15	Entered	77	Female	09NOV16	243	MF4637	<250 mg/day	Yes	No	>=250 mg/day	No	Yes	Yes	Yes	Yes
7	Montelukast	10		Allergy		mg	qd/od	Yes	PO	Yes	No	15_016	01NOV16	01NOV2016			15	Entered	77	Female	09NOV16	243	MF4637	<250 mg/day	Yes	No	>=250 mg/day	No	Yes	Yes	Yes	Yes
8	Nexium	40		GERD		mg	qd/od	Yes	PO	Yes	No	15_016	01SEP15	01SEP2015			15	Entered	77	Female	09NOV16	243	MF4637	<250 mg/day	Yes	No	>=250 mg/day	No	Yes	Yes	Yes	Yes
9	Valsartan	80		Hypertension		mg	qd/od	Yes	PO	Yes	No	15_016	01JUL16	01JUL2016			15	Entered	77	Female	09NOV16	243	MF4637	<250 mg/day	Yes	No	>=250 mg/day	No	Yes	Yes	Yes	Yes
10	ProAir HFA	60		COPD		mg	qid	Yes	PO	Yes	No	15_016	01NOV15	01NOV2015			15	Entered	77	Female	09NOV16	243	MF4637	<250 mg/day	Yes	No	>=250 mg/day	No	Yes	Yes	Yes	Yes
11	Vitamin D	50.000	Weekly	Supplement		IU	other (specify)	Yes	PO	Yes	No	15_016	01SEP15	01SEP2015			15	Entered	77	Female	09NOV16	243	MF4637	<250 mg/day	Yes	No	>=250 mg/day	No	Yes	Yes	Yes	Yes
12	Zolpidem	10		Anxiety		mg	qd/od	Yes	PO	Yes	No	15_016	01MAR16	01MAR2016			15	Entered	77	Female	09NOV16	243	MF4637	<250 mg/day	Yes	No	>=250 mg/day	No	Yes	Yes	Yes	Yes
13	Vesicare	5		urinary incontinence		mg	qd/od	Yes	PO	Yes	No	15_016	01MAR16	01MAR2016			15	Entered	77	Female	09NOV16	243	MF4637	<250 mg/day	Yes	No	>=250 mg/day	No	Yes	Yes	Yes	Yes
1	Voltaren	2		Osteoarthritis		g	bid	Yes	top	Yes	No	15_017	01SEP16	01SEP2016			15	Entered	62	Male	10NOV16	270	Placebo	<250 mg/day	No	No	<250 mg/day	No	Yes	Yes	Yes	No
2	Escitalopram	10		Depression		mg	qd/od	Yes	PO	Yes	No	15_017	01SEP16	01SEP2016			15	Entered	62	Male	10NOV16	270	Placebo	<250 mg/day	No	No	<250 mg/day	No	Yes	Yes	Yes	No
3	Ibuprofen	800		Osteoarthritis		mg	tid	Yes	PO	Yes	No	15_017	01SEP16	01SEP2016			15	Entered	62	Male	10NOV16	270	Placebo	<250 mg/day	No	No	<250 mg/day	No	Yes	Yes	Yes	No
4	Simvastatin	40		Cholesterol		mg	qd/od	Yes	PO	Yes	No	15_017	01AUG16	01AUG2016			15	Entered	62	Male	10NOV16	270	Placebo	<250 mg/day	No	No	<250 mg/day	No	Yes	Yes	Yes	No
5	Pantoprazole	40		GERD		mg	qd/od	Yes	PO	Yes	No	15_017	01AUG16	01AUG2016			15	Entered	62	Male	10NOV16	270	Placebo	<250 mg/day	No	No	<250 mg/day	No	Yes	Yes	Yes	No
1	Albuterol	108		COPD		ug	qd/od	Yes	inh	Yes	No	15_018	01AUG16	01AUG2016			15	Entered	57	Male	15NOV16	269	MF4637	<250 mg/day	No	No	<250 mg/day	No	Yes	Yes	Yes	Yes
2	Carvedilol	6.25		Hypertension		mg	qd/od	Yes	PO	Yes	No	15_018	01AUG16	01AUG2016			15	Entered	57	Male	15NOV16	269	MF4637	<250 mg/day	No	No	<250 mg/day	No	Yes	Yes	Yes	Yes
3	Clonazepam	0.5		Anxiety		mg	qd/od	Yes	PO	Yes	No	15_018	01MAR16	01MAR2016			15	Entered	57	Male	15NOV16	269	MF4637	<250 mg/day	No	No	<250 mg/day	No	Yes	Yes	Yes	Yes
4	Diciclomine	20		GERD		mg	qd/od	Yes	PO	Yes	No	15_018	01AUG16	01AUG2016			15	Entered	57	Male	15NOV16	269	MF4637	<250 mg/day	No	No	<250 mg/day	No	Yes	Yes	Yes	Yes
5	Finasteride	5		Prostate		mg	qd/od	Yes	PO	Yes	No	15_018	01AUG16	01AUG2016			15	Entered	57	Male	15NOV16	269	MF4637	<250 mg/day	No	No	<250 mg/day	No	Yes	Yes	Yes	Yes
6	Montelukast	10		Allergy		mg	qd/od	Yes	PO	Yes	No	15_018	01AUG16	01AUG2016			15	Entered	57	Male	15NOV16	269	MF4637	<250 mg/day	No	No	<250 mg/day	No	Yes	Yes	Yes	Yes
7	Pantoprazole	40		GERD		mg	qd/od	Yes	PO	Yes	No	15_018	01AUG16	01AUG2016			15	Entered	57	Male	15NOV16	269	MF4637	<250 mg/day	No	No	<250 mg/day	No	Yes	Yes	Yes	Yes
8	Trazodone	50		Depression		mg	qd/od	Yes	PO	Yes	No	15_018	01MAY16	01MAY2016			15	Entered	57	Male	15NOV16	269	MF4637	<250 mg/day	No	No	<250 mg/day	No	Yes	Yes	Yes	Yes
9	Azithromycin	1		Respiratory Tract Infection		g	qd/od	Yes	PO	Yes	No	15_018	06FEB17	06FEB2017			15	Entered	57	Male	15NOV16	269	MF4637	<250 mg/day	No	No	<250 mg/day	No	Yes	Yes	Yes	Yes
1	Pantoprazole	40		GERD		mg	qd/od	Yes	PO	Yes	No	15_019	01FEB16	01FEB2016			15	Entered	38	Female	17NOV16	271	Placebo	<250 mg/day	No	No	>=250 mg/day	No	Yes	Yes	Yes	Yes
2	Sucralfate	1		GERD		mg	qd/od	Yes	PO	Yes	No	15_019	01FEB16	01FEB2016			15	Entered	38	Female	17NOV16	271	Placebo	<250 mg/day	No	No	>=250 mg/day	No	Yes	Yes	Yes	Yes
3	Propanolol	10		Hypertension		mg	qd/od	Yes	PO	Yes	No	15_019	16APR16	16APR2016			15	Entered	38	Female	17NOV16	271	Placebo	<250 mg/day	No	No	>=250 mg/day	No	Yes	Yes	Yes	Yes
4	Temazepam	30		Anxiety		mg	qd/od	Yes	PO	Yes	No	15_019	01APR16	01APR2016			15	Entered	38	Female	17NOV16	271	Placebo	<250 mg/day	No	No	>=250 mg/day	No	Yes	Yes	Yes	Yes
5	Latuda	80		Depression		mg	qd/od	Yes	PO	Yes	No	15_019	01MAR16	01MAR2016			15	Entered	38	Female	17NOV16	271	Placebo	<250 mg/day	No	No	>=250 mg/day	No	Yes	Yes	Yes	Yes
1	Levothyroxine	0.75		Hypothyroidism		mg	qd/od	Yes	PO	Yes	No	15_020	01JAN16	01JAN2016			15	Early Termination	65	Female	30NOV16	272	MF4637	<250 mg/day	No	No	>=250 mg/day	No	Yes	Yes	Yes	Yes
1	Metformin	500		Diabetes Mellitus		mg	qd/od		PO	Yes	No	15_022	06DEC16	06DEC2016	19JAN17	19JAN2017	15	Entered	48	Male	09DEC16	274	Placebo	<250 mg/day	No	No	<250 mg/day	No	Yes	Yes	Yes	Yes
2	Metformin	500		Diabetes Mellitus		mg	bid	Yes	PO	Yes	No	15_022	20JAN17	20JAN2017			15	Entered	48	Male	09DEC16	274	Placebo	<250 mg/day	No	No	<250 mg/day	No	Yes	Yes	Yes	Yes
1	Metformin	500		Diabetes Mellitus		mg	qd/od	Yes	PO	Yes	No	15_023	01SEP16	01SEP2016			15	Entered	58	Female	06DEC16	275	MF4637	<250 mg/day	No	No	>=250 mg/day	No	Yes	Yes	Yes	Yes
2	Carvedilol	12.5		Hypertension		mg	qd/od	Yes	PO	Yes	No	15_023	01AUG16	01AUG2016			15	Entered	58	Female	06DEC16	275	MF4637	<250 mg/day	No	No	>=250 mg/day	No	Yes	Yes	Yes	Yes
3	Losartan	25		HYpertension		mg	qd/od	Yes	PO	Yes	No	15_023	01AUG16	01AUG2016			15	Entered	58	Female	06DEC16	275	MF4637	<250 mg/day	No	No	>=250 mg/day	No	Yes	Yes	Yes	Yes
4	Simvastatin	10		Cholesterol		mg	qd/od		PO	No	No	15_023	01JUL16	01JUL2016	01SEP16	01SEP2016	15	Entered	58	Female	06DEC16	275	MF4637	<250 mg/day	No	No	>=250 mg/day	No	Yes	Yes	Yes	Yes
5	Atorvastatin	20		Cholesterol		mg	qd/od		PO	Yes	No	15_023	01OCT16	01OCT2016	23FEB17	23FEB2017	15	Entered	58	Female	06DEC16	275	MF4637	<250 mg/day	No	No	>=250 mg/day	No	Yes	Yes	Yes	Yes
6	Sinvastatin	40		high Cholesterol		mg	qd/od	Yes	PO	Yes	No	15_023	23FEB17	23FEB2017			15	Entered	58	Female	06DEC16	275	MF4637	<250 mg/day	No	No	>=250 mg/day	No	Yes	Yes	Yes	Yes
1	Metformin	500		Diabetes Mellitus		mg	qd/od	Yes	PO	Yes	No	15_024	01JUL14	01JUL2014			15	Screen Failure	74	Female							<250 mg/day	Yes	No	No	No	No
2	Enalapril	20		Hypertension		mg	qd/od	Yes	PO	Yes	No	15_024	01JUL14	01JUL2014			15	Screen Failure	74	Female							<250 mg/day	Yes	No	No	No	No
3	Simvastatin	20		Hyperlipidemia		mg	qd/od	Yes	PO	Yes	No	15_024	01MAR15	01MAR2015			15	Screen Failure	74	Female							<250 mg/day	Yes	No	No	No	No
1	Glipizide	10		Diabetes Mellitus type 2		mg	bid	Yes	PO	Yes	No	17_002		2001			17	Entered	70	Female	10NOV16	192	MF4637	<250 mg/day	Yes	No	<250 mg/day	No	Yes	Yes	Yes	Yes
2	Gabapentin	100		Pain		mg	bid	Yes	PO	Yes	No	17_002	06AUG16	06AUG2016			17	Entered	70	Female	10NOV16	192	MF4637	<250 mg/day	Yes	No	<250 mg/day	No	Yes	Yes	Yes	Yes
3	Omeprazole	20		Gastritis		mg	qd/od	Yes	PO	Yes	No	17_002	06AUG16	06AUG2016			17	Entered	70	Female	10NOV16	192	MF4637	<250 mg/day	Yes	No	<250 mg/day	No	Yes	Yes	Yes	Yes
1	Losartan	100		Hypertension		mg	qd/od	Yes	PO	Yes	No	17_003	07MAY16	07MAY2016			17	Entered	62	Female	10NOV16	193	MF4637	>=250 mg/day	Yes	No	<250 mg/day	No	Yes	Yes	Yes	Yes
2	Metformin	500		Diabetes Mellitus type 2		mg	tid	Yes	PO	Yes	No	17_003	08OCT16	08OCT2016			17	Entered	62	Female	10NOV16	193	MF4637	>=250 mg/day	Yes	No	<250 mg/day	No	Yes	Yes	Yes	Yes
3	Ibuprofen	800		Pain		mg	bid	Yes	PO	Yes	No	17_003	08OCT16	08OCT2016			17	Entered	62	Female	10NOV16	193	MF4637	>=250 mg/day	Yes	No	<250 mg/day	No	Yes	Yes	Yes	Yes
4	Glipizide	5		Diabetes Mellitus type 2		mg	bid	Yes	PO	Yes	No	17_003	08OCT16	08OCT2016			17	Entered	62	Female	10NOV16	193	MF4637	>=250 mg/day	Yes	No	<250 mg/day	No	Yes	Yes	Yes	Yes
5	Ranitidine	150		Gasstritis		mg	qd/od	Yes	PO	Yes	No	17_003	08OCT16	08OCT2016			17	Entered	62	Female	10NOV16	193	MF4637	>=250 mg/day	Yes	No	<250 mg/day	No	Yes	Yes	Yes	Yes
1	Advair	250/50		Asthma		puff	bid	Yes	inh	Yes	No	17_005		2013			17	Entered	65	Female	16NOV16	213	MF4637	<250 mg/day	No	No	<250 mg/day	No	Yes	Yes	Yes	Yes
1	Percocel	5/325	Q 6 hours PRN for pain	pain		mg	other (specify)	Yes	PO	Yes	No	17_006	19APR17	19APR2017			17	Entered	61	Female	21NOV16	194	Placebo	<250 mg/day	No	No	<250 mg/day	No	Yes	Yes	Yes	Yes
1	Lisonopril	40		Hypertension		mg	qd/od	Yes	PO	Yes	No	17_008		2015			17	Entered	67	Female	25NOV16	195	Placebo	<250 mg/day	Yes	No	<250 mg/day	No	Yes	Yes	Yes	Yes
2	Metformin	500		Diabetes Mellitus type 2		mg	bid	Yes	PO	Yes	No	17_008		2014			17	Entered	67	Female	25NOV16	195	Placebo	<250 mg/day	Yes	No	<250 mg/day	No	Yes	Yes	Yes	Yes
1	Amlodipine	10		Hypertension		mg	qd/od	Yes	PO	Yes	No	17_009	16NOV16	16NOV2016			17	Entered	70	Male	25NOV16	215	Placebo	<250 mg/day	No	No	<250 mg/day	No	Yes	Yes	Yes	Yes
2	Irbesartan	300		Hypertension		mg	qd/od	Yes	PO	Yes	No	17_009	16NOV16	16NOV2016			17	Entered	70	Male	25NOV16	215	Placebo	<250 mg/day	No	No	<250 mg/day	No	Yes	Yes	Yes	Yes
1	Synthroid	0.05		Hypothyroidism		mg	qd/od	Yes	PO	Yes	No	17_010		2014			17	Entered	68	Female	25NOV16	230	MF4637	<250 mg/day	No	No	<250 mg/day	No	Yes	Yes	Yes	Yes
1	Fergon	240		Anemia		mg	qd/od	Yes	PO	Yes	No	18_001	18AUG16	18AUG2016			18	Entered	46	Female	18OCT16	220	Placebo	<250 mg/day	No	No	<250 mg/day	No	Yes	Yes	Yes	Yes
2	bactrim DS	800/160		urinary tract infection		mg	bid	Yes	PO	Yes	No	18_001	22DEC16	22DEC2016			18	Entered	46	Female	18OCT16	220	Placebo	<250 mg/day	No	No	<250 mg/day	No	Yes	Yes	Yes	Yes
3	Anaprox DS	500		pelvic pain		mg	prn	Yes	PO	Yes	No	18_001	22DEC16	22DEC2016			18	Entered	46	Female	18OCT16	220	Placebo	<250 mg/day	No	No	<250 mg/day	No	Yes	Yes	Yes	Yes
1	Lisinopril	10		Hypertension		mg	qd/od	Yes	PO	Yes	No	18_002	23JAN14	23JAN2014			18	Entered	52	Female	24OCT16	222	MF4637	<250 mg/day	No	No	<250 mg/day	No	Yes	Yes	Yes	Yes
2	Hydrochlorothiazide	12.5		Hypertension		mg	qd/od	Yes	PO	Yes	No	18_002	23JAN14	23JAN2014			18	Entered	52	Female	24OCT16	222	MF4637	<250 mg/day	No	No	<250 mg/day	No	Yes	Yes	Yes	Yes
3	Omeprazole	20		Gastrointestinal reflux disease		mg	bid	Yes	PO	Yes	No	18_002	23JAN14	23JAN2014			18	Entered	52	Female	24OCT16	222	MF4637	<250 mg/day	No	No	<250 mg/day	No	Yes	Yes	Yes	Yes
4	Triamcinolone	.1		Dermatitis			bid	Yes	top	Yes	No	18_002	03DEC14	03DEC2014			18	Entered	52	Female	24OCT16	222	MF4637	<250 mg/day	No	No	<250 mg/day	No	Yes	Yes	Yes	Yes
5	Ondansetron	4	qhs	Dysuria		mg	other (specify)		PO	Yes	No	18_002	03OCT16	03OCT2016	09OCT16	09OCT2016	18	Entered	52	Female	24OCT16	222	MF4637	<250 mg/day	No	No	<250 mg/day	No	Yes	Yes	Yes	Yes
6	Methenamine	162		Dysuria		mg	tid		PO	Yes	No	18_002	03OCT16	03OCT2016	09OCT16	09OCT2016	18	Entered	52	Female	24OCT16	222	MF4637	<250 mg/day	No	No	<250 mg/day	No	Yes	Yes	Yes	Yes
7	Sodium Salicylate	162.5		Dysuria		mg	tid		PO	Yes	No	18_002	03OCT16	03OCT2016	09OCT16	09OCT2016	18	Entered	52	Female	24OCT16	222	MF4637	<250 mg/day	No	No	<250 mg/day	No	Yes	Yes	Yes	Yes
8	Macrobid	100		Dysuria		mg	bid		PO	Yes	No	18_002	03OCT16	03OCT2016	09OCT16	09OCT2016	18	Entered	52	Female	24OCT16	222	MF4637	<250 mg/day	No	No	<250 mg/day	No	Yes	Yes	Yes	Yes
1	Atorvastatin	20		Hyperlipidemia		mg	qd/od	Yes	PO	Yes	No	18_003	26JAN16	26JAN2016			18	Entered	55	Female	26OCT16	221	Placebo	>=250 mg/day	Yes	Yes	>=250 mg/day	No	Yes	Yes	Yes	Yes
2	Invokana	150		Diabetes Type II		mg	bid		PO	Yes	No	18_003	26JAN16	26JAN2016	17JAN17	17JAN2017	18	Entered	55	Female	26OCT16	221	Placebo	>=250 mg/day	Yes	Yes	>=250 mg/day	No	Yes	Yes	Yes	Yes
3	Metformin	1000		Diabetes Type II		mg	bid	Yes	PO	Yes	No	18_003	26JAN16	26JAN2016			18	Entered	55	Female	26OCT16	221	Placebo	>=250 mg/day	Yes	Yes	>=250 mg/day	No	Yes	Yes	Yes	Yes
4	Metoprolol Succinate ER	25		Hypertension		mg	qd/od	Yes	PO	Yes	No	18_003	26JAN16	26JAN2016			18	Entered	55	Female	26OCT16	221	Placebo	>=250 mg/day	Yes	Yes	>=250 mg/day	No	Yes	Yes	Yes	Yes
5	Enalapril	2.5		Hypertension		mg	qd/od	Yes	PO	Yes	No	18_003	26JAN16	26JAN2016			18	Entered	55	Female	26OCT16	221	Placebo	>=250 mg/day	Yes	Yes	>=250 mg/day	No	Yes	Yes	Yes	Yes
6	Aspirin	81		Cardiac prophylaxis		mg	qd/od	Yes	PO	Yes	No	18_003	26JAN16	26JAN2016			18	Entered	55	Female	26OCT16	221	Placebo	>=250 mg/day	Yes	Yes	>=250 mg/day	No	Yes	Yes	Yes	Yes
7	Jardiance	10		Diabetes Type II		mg	qd/od	Yes	PO	Yes	No	18_003	18JAN17	18JAN2017			18	Entered	55	Female	26OCT16	221	Placebo	>=250 mg/day	Yes	Yes	>=250 mg/day	No	Yes	Yes	Yes	Yes
1	enalapril	10		hypertension		mg	qd/od	Yes	PO	Yes	No	19_001		2001			19	Entered	53	Female	28OCT16	225	Placebo	<250 mg/day	No	No	>=250 mg/day	No	Yes	Yes	Yes	Yes
1	METFORMIN	500		DM2		mg	bid	Yes	PO	Yes	No	19_004		2014			19	Entered	53	Female	04NOV16	226	MF4637	<250 mg/day	No	No	>=250 mg/day	No	Yes	Yes	Yes	Yes
1	lisinopril	10		hypertension		mg	qd/od	Yes	PO	Yes	No	19_005		2011			19	Entered	51	Male	04NOV16	227	Placebo	<250 mg/day	No	No	<250 mg/day	No	Yes	Yes	Yes	Yes
1	atorvastatin	20		hypertiglycemia		mg	qd/od	Yes	PO	Yes	No	19_010		2015			19	Entered	33	Male	21NOV16	291	MF4637	<250 mg/day	No	No	>=250 mg/day	No	Yes	Yes	Yes	Yes
1	metformin	500		DM 2		mg	bid	Yes	PO	Yes	No	19_012		2009			19	Entered	55	Female	21NOV16	288	Placebo	<250 mg/day	Yes	No	>=250 mg/day	No	Yes	Yes	Yes	Yes
2	LISINOPRIL	10		HYPERTENSION		mg	qd/od	Yes	PO	Yes	No	19_012		2010			19	Entered	55	Female	21NOV16	288	Placebo	<250 mg/day	Yes	No	>=250 mg/day	No	Yes	Yes	Yes	Yes
3	SIMVASTATIN	10		HYPERCHOLESTEROLEMIA		mg	qd/od	Yes	PO	Yes	No	19_012		2013			19	Entered	55	Female	21NOV16	288	Placebo	<250 mg/day	Yes	No	>=250 mg/day	No	Yes	Yes	Yes	Yes
