# Supplementary material for: Evaluation of a High Concentrate Omega-3 for Correcting the Omega-3 Fatty Acid Nutritional Deficiency in Non-alcoholic Fatty Liver Disease and effects on Hepatic Steatosis (CONDIN)
Source: Preprints.org preprint supplement (doi:10.20944/preprints201807.0240.v1), 2018-07-13
Supplement: Supplementary file 3 [file DA.xlsx]

## Sheet: DA
DASPID	BOTTLE	DANUMDIS	DADISPBY	DANUMRET	DARETTO	DANUMTKN	DANUMEXP	COMPSITE	COMPLIAN	SUBJID	DADISDT	CDDADIS	DARETDT	CDDARET	RANDNUM	SITE	STATUS	AGE	SEX	FIRSTDT	RANDNO	TREAT	OMEGA	DIABETE	STATIN	OMEGA_C	SFFL	SAFETY	ITT	MITT	PP
1	1	160	AS	34	AS	126	126	100	100	02_001	27OCT15	27OCT2015	08DEC15	08DEC2015	108	02	Entered	57	Female	27OCT15	108	MF4637	<250 mg/day	Yes	Yes	<250 mg/day	No	Yes	Yes	Yes	Yes
2	2	160	AS	46	AS	114	114	100	100	02_001	08DEC15	08DEC2015	15JAN16	15JAN2016	108	02	Entered	57	Female	27OCT15	108	MF4637	<250 mg/day	Yes	Yes	<250 mg/day	No	Yes	Yes	Yes	Yes
3	3	160	AS	0	AS	160	160	100	100	02_001	15JAN16	15JAN2016	11APR16	11APR2016	108	02	Entered	57	Female	27OCT15	108	MF4637	<250 mg/day	Yes	Yes	<250 mg/day	No	Yes	Yes	Yes	Yes
4	4	160	AS	59	AS	101	101	100	100	02_001	15JAN16	15JAN2016	11APR16	11APR2016	108	02	Entered	57	Female	27OCT15	108	MF4637	<250 mg/day	Yes	Yes	<250 mg/day	No	Yes	Yes	Yes	Yes
1	1	160	AS	34	AS	126	126	100	100	02_002	05NOV15	05NOV2015	17DEC15	17DEC2015	109	02	Entered	41	Male	06NOV15	109	MF4637	<250 mg/day	No	Yes	>=250 mg/day	No	Yes	Yes	Yes	Yes
2	2	160	AS	34	AS	126	126	100	100	02_002	17DEC15	17DEC2015	28JAN16	28JAN2016	109	02	Entered	41	Male	06NOV15	109	MF4637	<250 mg/day	No	Yes	>=250 mg/day	No	Yes	Yes	Yes	Yes
3	3	160	AS	0	AS	160	160	100	100	02_002	28JAN16	28JAN2016	22APR16	22APR2016	109	02	Entered	41	Male	06NOV15	109	MF4637	<250 mg/day	No	Yes	>=250 mg/day	No	Yes	Yes	Yes	Yes
4	4	160	AS	59	AS	101	101	100	100	02_002	28JAN16	28JAN2016	22APR16	22APR2016	109	02	Entered	41	Male	06NOV15	109	MF4637	<250 mg/day	No	Yes	>=250 mg/day	No	Yes	Yes	Yes	Yes
1	2	160	AS	1	AS	159	159	100	100	02_003	10DEC15	10DEC2015	01FEB16	01FEB2016	110	02	Entered	58	Male	03NOV15	110	Placebo	>=250 mg/day	Yes	Yes	<250 mg/day	No	Yes	Yes	Yes	Yes
2	1	160	AS	49	AS	111	111	100	100	02_003	03NOV15	03NOV2015	10DEC15	10DEC2015	110	02	Entered	58	Male	03NOV15	110	Placebo	>=250 mg/day	Yes	Yes	<250 mg/day	No	Yes	Yes	Yes	Yes
3	3	160	AS	0	AS	160	160	100	100	02_003	01FEB16	01FEB2016	18APR16	18APR2016	110	02	Entered	58	Male	03NOV15	110	Placebo	>=250 mg/day	Yes	Yes	<250 mg/day	No	Yes	Yes	Yes	Yes
4	4	160	AS	89	AS	71	71	100	100	02_003	01FEB16	01FEB2016	18APR16	18APR2016	110	02	Entered	58	Male	03NOV15	110	Placebo	>=250 mg/day	Yes	Yes	<250 mg/day	No	Yes	Yes	Yes	Yes
1	1	160	LM	34	AS	126	126	100	100	02_004	11NOV15	11NOV2015	23DEC15	23DEC2015	111	02	Early Termination	60	Female	12NOV15	111	Placebo	<250 mg/day	Yes	Yes	<250 mg/day	No	Yes	Yes	Yes	Yes
2	2	160	AS	34	AS	126	126	100	100	02_004	23DEC15	23DEC2015	03FEB16	03FEB2016	111	02	Early Termination	60	Female	12NOV15	111	Placebo	<250 mg/day	Yes	Yes	<250 mg/day	No	Yes	Yes	Yes	Yes
3	3	160	LM	0	AS	160	160	100	100	02_004	03FEB16	03FEB2016	01APR16	01APR2016	111	02	Early Termination	60	Female	12NOV15	111	Placebo	<250 mg/day	Yes	Yes	<250 mg/day	No	Yes	Yes	Yes	Yes
4	4	160	LM	146	AS	14	14	100	100	02_004	03FEB16	03FEB2016	01APR16	01APR2016	111	02	Early Termination	60	Female	12NOV15	111	Placebo	<250 mg/day	Yes	Yes	<250 mg/day	No	Yes	Yes	Yes	Yes
1	1	160	AS	34	AS	126	126	100	100	02_005	04DEC15	04DEC2015	15JAN16	15JAN2016	112	02	Entered	65	Male	04DEC15	112	Placebo	>=250 mg/day	No	No	>=250 mg/day	No	Yes	Yes	Yes	Yes
2	2	160	AS	37	AS	123	123	100	100	02_005	15JAN16	15JAN2016	25FEB16	25FEB2016	112	02	Entered	65	Male	04DEC15	112	Placebo	>=250 mg/day	No	No	>=250 mg/day	No	Yes	Yes	Yes	Yes
3	3	160	AS	0	AS	160	160	100	100	02_005	25FEB16	25FEB2016	20MAY16	20MAY2016	112	02	Entered	65	Male	04DEC15	112	Placebo	>=250 mg/day	No	No	>=250 mg/day	No	Yes	Yes	Yes	Yes
4	4	160	AS	65	AS	95	95	100	100	02_005	25FEB16	25FEB2016	20MAY16	20MAY2016	112	02	Entered	65	Male	04DEC15	112	Placebo	>=250 mg/day	No	No	>=250 mg/day	No	Yes	Yes	Yes	Yes
1	1	160	MO	74	bj	86	160	53.75	53.75	03_001	19NOV16	19NOV2016			117	03	Early Termination	53	Male	19NOV15	117	MF4637	<250 mg/day	No	No	>=250 mg/day	No	Yes	Yes	No	No
1	1	160	MO	17	MO	143	160	89.38	89.38	03_002	30OCT15	30OCT2015	15DEC15	15DEC2015	116	03	Early Termination	52	Female	30OCT15	116	Placebo	<250 mg/day	No	No	<250 mg/day	No	Yes	Yes	Yes	Yes
2	2	160	MO	151	BJ	9	160	5.62	5.62	03_002	15DEC15	15DEC2015	15APR16	15APR2016	116	03	Early Termination	52	Female	30OCT15	116	Placebo	<250 mg/day	No	No	<250 mg/day	No	Yes	Yes	Yes	Yes
1	1	160	mo	6	mo	154	156	98.72	98.72	03_003	24NOV15	24NOV2015	15JAN16	15JAN2016	121	03	Entered	25	Male	24NOV15	121	MF4637	<250 mg/day	No	No	<250 mg/day	No	Yes	Yes	Yes	Yes
2	2	160	mo	23	mo	137	144	95.14	95.14	03_003	15JAN16	15JAN2016	03MAR16	03MAR2016	121	03	Entered	25	Male	24NOV15	121	MF4637	<250 mg/day	No	No	<250 mg/day	No	Yes	Yes	Yes	Yes
3	3	160	bj	0	bj	160	160	100	100	03_003	03MAR16	03MAR2016	01JUN16	01JUN2016	121	03	Entered	25	Male	24NOV15	121	MF4637	<250 mg/day	No	No	<250 mg/day	No	Yes	Yes	Yes	Yes
4	4	160	bj	14	bj	146	110	132.73	132.73	03_003	03MAR16	03MAR2016	01JUN16	01JUN2016	121	03	Entered	25	Male	24NOV15	121	MF4637	<250 mg/day	No	No	<250 mg/day	No	Yes	Yes	Yes	Yes
1	1	160	mo	52	mo	108	129	83.72	83.72	03_004	23NOV15	23NOV2015	05JAN16	05JAN2016	118	03	Entered	56	Female	24NOV15	118	Placebo	<250 mg/day	No	No	>=250 mg/day	No	Yes	Yes	Yes	Yes
2	2	160	mo	37	mo	123	126	97.62	97.62	03_004	05JAN16	05JAN2016	16FEB16	16FEB2016	118	03	Entered	56	Female	24NOV15	118	Placebo	<250 mg/day	No	No	>=250 mg/day	No	Yes	Yes	Yes	Yes
3	3	160	BJ	0	BJ	160	160	100	100	03_004	16FEB16	16FEB2016	10MAY16	10MAY2016	118	03	Entered	56	Female	24NOV15	118	Placebo	<250 mg/day	No	No	>=250 mg/day	No	Yes	Yes	Yes	Yes
4	4	160	bj	41	bj	119	92	129.35	129.35	03_004	16FEB16	16FEB2016	10MAY16	10MAY2016	118	03	Entered	56	Female	24NOV15	118	Placebo	<250 mg/day	No	No	>=250 mg/day	No	Yes	Yes	Yes	Yes
2	2	160	bj	0	bj	160	132	121.21	121.21	03_005	13FEB16	13FEB2016	26FEB16	26FEB2016	119	03	Early Termination	49	Female	25NOV15	119	MF4637	>=250 mg/day	No	No	<250 mg/day	No	Yes	Yes	Yes	Yes
3	3	160	bj	50	bj	110	123	89.43	89.43	03_005	26FEB16	26FEB2016	07APR16	07APR2016	119	03	Early Termination	49	Female	25NOV15	119	MF4637	>=250 mg/day	No	No	<250 mg/day	No	Yes	Yes	Yes	Yes
4	4	160	bj	160	bj	0	0	0	0	03_005	26FEB16	26FEB2016	07APR16	07APR2016	119	03	Early Termination	49	Female	25NOV15	119	MF4637	>=250 mg/day	No	No	<250 mg/day	No	Yes	Yes	Yes	Yes
5	1	160	MO	0	bj	0	125	0	0	03_005	24NOV15	24NOV2015	13FEB16	13FEB2016	119	03	Early Termination	49	Female	25NOV15	119	MF4637	>=250 mg/day	No	No	<250 mg/day	No	Yes	Yes	Yes	Yes
1	1	160	mo	53	mo	111	126	88.1	88.1	03_007	18NOV15	18NOV2015	30DEC15	30DEC2015	120	03	Entered	40	Male	19NOV15	120	Placebo	<250 mg/day	No	No	<250 mg/day	No	Yes	Yes	Yes	No
2	2	160	mo	34	mo	126	126	100	100	03_007	30DEC15	30DEC2015	26FEB16	26FEB2016	120	03	Entered	40	Male	19NOV15	120	Placebo	<250 mg/day	No	No	<250 mg/day	No	Yes	Yes	Yes	No
4	3	160	bj	0	bj	0	160	0	0	03_007	26FEB16	26FEB2016	01JUN16	01JUN2016	120	03	Entered	40	Male	19NOV15	120	Placebo	<250 mg/day	No	No	<250 mg/day	No	Yes	Yes	Yes	No
5	4	160	bj	24	bj	136	128	106.25	106.25	03_007	26FEB16	26FEB2016	01JUN16	01JUN2016	120	03	Entered	40	Male	19NOV15	120	Placebo	<250 mg/day	No	No	<250 mg/day	No	Yes	Yes	Yes	No
1	1	160	mo	32	bj	128	126	101.59	101.59	03_009	12JAN16	12JAN2016	23FEB16	23FEB2016	122	03	Entered	40	Male	13JAN16	122	MF4637	<250 mg/day	No	No	>=250 mg/day	No	Yes	Yes	Yes	Yes
2	2	160	bj	54	bj	106	105	100.95	100.95	03_009	23FEB16	23FEB2016	29MAR16	29MAR2016	122	03	Entered	40	Male	13JAN16	122	MF4637	<250 mg/day	No	No	>=250 mg/day	No	Yes	Yes	Yes	Yes
3	3	160	BJ	77	BJ	83	123	67.48	67.48	03_009	29MAR16	29MAR2016	29JUN16	29JUN2016	122	03	Entered	40	Male	13JAN16	122	MF4637	<250 mg/day	No	No	>=250 mg/day	No	Yes	Yes	Yes	Yes
4	4	160	BJ	7	BJ	153	153	100	100	03_009	29MAR16	29MAR2016	29JUN16	29JUN2016	122	03	Entered	40	Male	13JAN16	122	MF4637	<250 mg/day	No	No	>=250 mg/day	No	Yes	Yes	Yes	Yes
1	1	160	mo	107	bj	54	126	42.86	42.86	03_010	12JAN16	12JAN2016	23FEB16	23FEB2016	123	03	Entered	41	Male	12JAN16	123	Placebo	>=250 mg/day	No	No	>=250 mg/day	No	Yes	Yes	Yes	Yes
2	2	160	mo	72	BJ	88	93	94.62	94.62	03_010	23FEB16	23FEB2016	25MAR16	25MAR2016	123	03	Entered	41	Male	12JAN16	123	Placebo	>=250 mg/day	No	No	>=250 mg/day	No	Yes	Yes	Yes	Yes
3	3	160	bj	85	bj	90	160	56.25	56.25	03_010	25MAR16	25MAR2016	19JUL16	19JUL2016	123	03	Entered	41	Male	12JAN16	123	Placebo	>=250 mg/day	No	No	>=250 mg/day	No	Yes	Yes	Yes	Yes
4	4	160	bj	58	bj	110	113	97.35	97.35	03_010	25MAR16	25MAR2016	19JUL16	19JUL2016	123	03	Entered	41	Male	12JAN16	123	Placebo	>=250 mg/day	No	No	>=250 mg/day	No	Yes	Yes	Yes	Yes
1	1	160	bj	44	bj	116	123	94.31	94.31	03_011	10FEB16	10FEB2016	22MAR16	22MAR2016	188	03	Entered	55	Male	11FEB16	188	MF4637	<250 mg/day	No	Yes	<250 mg/day	No	Yes	Yes	Yes	Yes
2	2	160	BJ	0	BJ	160	160	100	100	03_011	22MAR16	22MAR2016	17MAY16	17MAY2016	188	03	Entered	55	Male	11FEB16	188	MF4637	<250 mg/day	No	Yes	<250 mg/day	No	Yes	Yes	Yes	Yes
3	3	160	bj	56	bj	100	120	83.33	83.33	03_011	17MAY16	17MAY2016	01AUG16	01AUG2016	188	03	Entered	55	Male	11FEB16	188	MF4637	<250 mg/day	No	Yes	<250 mg/day	No	Yes	Yes	Yes	Yes
4	4	160	bj	46	bj	116	132	87.88	87.88	03_011	17MAY16	17MAY2016	01AUG16	01AUG2016	188	03	Entered	55	Male	11FEB16	188	MF4637	<250 mg/day	No	Yes	<250 mg/day	No	Yes	Yes	Yes	Yes
1	1	160	bj	36	bj	126	141	89.36	89.36	03_012	11FEB16	11FEB2016	29MAR16	29MAR2016	190	03	Entered	63	Male	12FEB16	190	MF4637	<250 mg/day	No	Yes	<250 mg/day	No	Yes	Yes	Yes	Yes
2	2	160	BJ	35	BJ	125	135	92.59	92.59	03_012	29MAR16	29MAR2016	13MAY16	13MAY2016	190	03	Entered	63	Male	12FEB16	190	MF4637	<250 mg/day	No	Yes	<250 mg/day	No	Yes	Yes	Yes	Yes
3	3	160	bj	22	bj	132	132	100	100	03_012	13MAY16	13MAY2016	01AUG16	01AUG2016	190	03	Entered	63	Male	12FEB16	190	MF4637	<250 mg/day	No	Yes	<250 mg/day	No	Yes	Yes	Yes	Yes
4	4	160	bj	36	bj	120	120	100	100	03_012	13MAY16	13MAY2016	01AUG16	01AUG2016	190	03	Entered	63	Male	12FEB16	190	MF4637	<250 mg/day	No	Yes	<250 mg/day	No	Yes	Yes	Yes	Yes
1	1	160	bj	36	bj	124	126	98.41	98.41	03_013	10FEB16	10FEB2016	23MAR16	23MAR2016	189	03	Entered	61	Female	11FEB16	189	Placebo	<250 mg/day	No	Yes	<250 mg/day	No	Yes	Yes	Yes	Yes
2	2	160	BJ	36	BJ	124	126	98.41	98.41	03_013	23MAR16	23MAR2016	04MAY16	04MAY2016	189	03	Entered	61	Female	11FEB16	189	Placebo	<250 mg/day	No	Yes	<250 mg/day	No	Yes	Yes	Yes	Yes
3	3	160	bj	56	bj	104	93	111.83	111.83	03_013	04MAY16	04MAY2016	25JUL16	25JUL2016	189	03	Entered	61	Female	11FEB16	189	Placebo	<250 mg/day	No	Yes	<250 mg/day	No	Yes	Yes	Yes	Yes
4	4	160	bj	67	bj	93	86	108.14	108.14	03_013	04MAY16	04MAY2016	25JUL16	25JUL2016	189	03	Entered	61	Female	11FEB16	189	Placebo	<250 mg/day	No	Yes	<250 mg/day	No	Yes	Yes	Yes	Yes
1	1	160	I.G	24	WT	136	117	116	116.24	04_001	14OCT15	14OCT2015	25NOV15	25NOV2015	124	04	Entered	49	Female	13OCT15	124	Placebo	>=250 mg/day	Yes	No	>=250 mg/day	No	Yes	Yes	Yes	Yes
2	2	160	WT	12	WT	148	132	112	112.12	04_001	25NOV15	25NOV2015	08JAN16	08JAN2016	124	04	Entered	49	Female	13OCT15	124	Placebo	>=250 mg/day	Yes	No	>=250 mg/day	No	Yes	Yes	Yes	Yes
3	3	160	WT				160			04_001	08JAN16	08JAN2016			124	04	Entered	49	Female	13OCT15	124	Placebo	>=250 mg/day	Yes	No	>=250 mg/day	No	Yes	Yes	Yes	Yes
4	4	160	WT	68	WT	92	92	100	100	04_001	08JAN16	08JAN2016	01APR16	01APR2016	124	04	Entered	49	Female	13OCT15	124	Placebo	>=250 mg/day	Yes	No	>=250 mg/day	No	Yes	Yes	Yes	Yes
1	1	160	BN	33	WT	127	126	100.79	100.79	04_004	14OCT15	14OCT2015	08JAN16	08JAN2016	125	04	Entered	34	Male	15OCT15	125	MF4637	<250 mg/day	No	No	<250 mg/day	No	Yes	Yes	Yes	No
2	2	160	BN	24	WT	136	132	103.03	103.03	04_004	25NOV15	25NOV2015	08JAN16	08JAN2016	125	04	Entered	34	Male	15OCT15	125	MF4637	<250 mg/day	No	No	<250 mg/day	No	Yes	Yes	Yes	No
3	3	160	BN				160			04_004	08JAN16	08JAN2016			125	04	Entered	34	Male	15OCT15	125	MF4637	<250 mg/day	No	No	<250 mg/day	No	Yes	Yes	Yes	No
4	4	160	BN	160	BN	0	89	0	0	04_004	08JAN16	08JAN2016	31MAR16	31MAR2016	125	04	Entered	34	Male	15OCT15	125	MF4637	<250 mg/day	No	No	<250 mg/day	No	Yes	Yes	Yes	No
1	1	160	vt	46	vt	114	114	100	100	04_009	04JAN16	04JAN2016	11FEB16	11FEB2016	127	04	Entered	53	Female	04JAN16	127	Placebo	<250 mg/day	No	No	<250 mg/day	No	Yes	Yes	Yes	Yes
2	2	160	vt	43	vt	117	129	90.7	90.7	04_009	11FEB16	11FEB2016	25MAR16	25MAR2016	127	04	Entered	53	Female	04JAN16	127	Placebo	<250 mg/day	No	No	<250 mg/day	No	Yes	Yes	Yes	Yes
3	3	160	vt	0	vt	160	160	100	100	04_009	25MAR16	25MAR2016	16JUN16	16JUN2016	127	04	Entered	53	Female	04JAN16	127	Placebo	<250 mg/day	No	No	<250 mg/day	No	Yes	Yes	Yes	Yes
4	4	160	vt	71	vt	89	89	100	100	04_009	25MAR16	25MAR2016	16JUN16	16JUN2016	127	04	Entered	53	Female	04JAN16	127	Placebo	<250 mg/day	No	No	<250 mg/day	No	Yes	Yes	Yes	Yes
1	1	160	vt	42	vt	118	129	91	91.47	04_010	05JAN16	05JAN2016	16FEB16	16FEB2016	126	04	Entered	25	Female	05JAN16	126	MF4637	>=250 mg/day	No	No	>=250 mg/day	No	Yes	Yes	Yes	Yes
2	2	160	vt	42	vt	118	129	91	91.47	04_010	16FEB16	16FEB2016	30MAR16	30MAR2016	126	04	Entered	25	Female	05JAN16	126	MF4637	>=250 mg/day	No	No	>=250 mg/day	No	Yes	Yes	Yes	Yes
3	3	160	vt	0	vt	160	160	100	100	04_010	30MAR16	30MAR2016	22JUN16	22JUN2016	126	04	Entered	25	Female	05JAN16	126	MF4637	>=250 mg/day	No	No	>=250 mg/day	No	Yes	Yes	Yes	Yes
4	4	160	vt	38	vt	122	92	132.61	132.61	04_010	30MAR16	30MAR2016	22JUN16	22JUN2016	126	04	Entered	25	Female	05JAN16	126	MF4637	>=250 mg/day	No	No	>=250 mg/day	No	Yes	Yes	Yes	Yes
1	1	160	vt	46	vt	114	123	92.68	92.68	04_011	26JAN16	26JAN2016	07MAR16	07MAR2016	129	04	Entered	41	Male	26JAN16	129	Placebo	>=250 mg/day	No	No	>=250 mg/day	No	Yes	Yes	Yes	Yes
2	2	160	vt	37	vt	123	129	95	95.35	04_011	07MAR16	07MAR2016	18APR16	18APR2016	129	04	Entered	41	Male	26JAN16	129	Placebo	>=250 mg/day	No	No	>=250 mg/day	No	Yes	Yes	Yes	Yes
3	3	160	vt	0	vt	160	129	124	124.03	04_011	18APR16	18APR2016	12JUL16	12JUL2016	129	04	Entered	41	Male	26JAN16	129	Placebo	>=250 mg/day	No	No	>=250 mg/day	No	Yes	Yes	Yes	Yes
4	4	160	vt	52	vt	108	129	83.7	83.72	04_011	18APR16	18APR2016	12JUL16	12JUL2016	129	04	Entered	41	Male	26JAN16	129	Placebo	>=250 mg/day	No	No	>=250 mg/day	No	Yes	Yes	Yes	Yes
1	1	160	WT	27	WT	129	126	102	102.38	04_012	18JAN16	18JAN2016	29FEB16	29FEB2016	128	04	Entered	19	Male	19JAN16	128	Placebo	<250 mg/day	No	No	<250 mg/day	No	Yes	Yes	Yes	Yes
2	2	160	WT				126			04_012	29FEB16	29FEB2016			128	04	Entered	19	Male	19JAN16	128	Placebo	<250 mg/day	No	No	<250 mg/day	No	Yes	Yes	Yes	Yes
3	3	160	WT	0	PV	160	126	127	126.98	04_012	14APR16	14APR2016	05JUL16	05JUL2016	128	04	Entered	19	Male	19JAN16	128	Placebo	<250 mg/day	No	No	<250 mg/day	No	Yes	Yes	Yes	Yes
4	4	160	WT	0	PV	160	126	127	126.98	04_012	14APR16	14APR2016	05JUL16	05JUL2016	128	04	Entered	19	Male	19JAN16	128	Placebo	<250 mg/day	No	No	<250 mg/day	No	Yes	Yes	Yes	Yes
1	1	160	vt	34	vt	126	126	100	100	04_013	15FEB16	15FEB2016	28MAR16	28MAR2016	130	04	Entered	64	Female	15FEB16	130	MF4637	<250 mg/day	No	Yes	<250 mg/day	No	Yes	Yes	Yes	Yes
2	2	160	vt	48	vt	112	126	88.89	88.89	04_013	28MAR16	28MAR2016	09MAY16	09MAY2016	130	04	Entered	64	Female	15FEB16	130	MF4637	<250 mg/day	No	Yes	<250 mg/day	No	Yes	Yes	Yes	Yes
3	3	160	vt	0	vt	160	160	100	100	04_013	09MAY16	09MAY2016	01AUG16	01AUG2016	130	04	Entered	64	Female	15FEB16	130	MF4637	<250 mg/day	No	Yes	<250 mg/day	No	Yes	Yes	Yes	Yes
4	4	160	vt	68	vt	92	92	100	100	04_013	09MAY16	09MAY2016	01AUG16	01AUG2016	130	04	Entered	64	Female	15FEB16	130	MF4637	<250 mg/day	No	Yes	<250 mg/day	No	Yes	Yes	Yes	Yes
1	1	160	vt	28	vt	132	126	104.8	104.76	04_014	25FEB16	25FEB2016	08APR16	08APR2016	131	04	Entered	35	Female	25FEB16	131	MF4637	>=250 mg/day	No	No	>=250 mg/day	No	Yes	Yes	Yes	Yes
2	2	160	vt	0	vt	0	126	0	0	04_014	08APR16	08APR2016	19MAY16	19MAY2016	131	04	Entered	35	Female	25FEB16	131	MF4637	>=250 mg/day	No	No	>=250 mg/day	No	Yes	Yes	Yes	Yes
3	3	160	vt	0	vt	0	126	0	0	04_014	19MAY16	19MAY2016	08AUG16	08AUG2016	131	04	Entered	35	Female	25FEB16	131	MF4637	>=250 mg/day	No	No	>=250 mg/day	No	Yes	Yes	Yes	Yes
4	4	160	vt	0	vt	0	126	0	0	04_014	19MAY16	19MAY2016	08AUG16	08AUG2016	131	04	Entered	35	Female	25FEB16	131	MF4637	>=250 mg/day	No	No	>=250 mg/day	No	Yes	Yes	Yes	Yes
1	1	160	vt	25	vt	135	132	102	102.27	04_015	21MAR16	21MAR2016	04MAY16	04MAY2016	198	04	Entered	50	Male	21MAR16	198	Placebo	<250 mg/day	No	Yes	<250 mg/day	No	Yes	Yes	Yes	No
2	2	160	vt	31	vt	129	129	100	100	04_015	04MAY16	04MAY2016	16JUN16	16JUN2016	198	04	Entered	50	Male	21MAR16	198	Placebo	<250 mg/day	No	Yes	<250 mg/day	No	Yes	Yes	Yes	No
3	3	160	vt	0	vt	0	0	0		04_015	16JUN16	16JUN2016	04NOV16	04NOV2016	198	04	Entered	50	Male	21MAR16	198	Placebo	<250 mg/day	No	Yes	<250 mg/day	No	Yes	Yes	Yes	No
4	4	160	vt	0	vt	0	0	0		04_015	16JUN16	16JUN2016	04NOV16	04NOV2016	198	04	Entered	50	Male	21MAR16	198	Placebo	<250 mg/day	No	Yes	<250 mg/day	No	Yes	Yes	Yes	No
1	1	160	VT	0						04_018	02AUG16	02AUG2016			197	04	Early Termination	37	Male		197	MF4637	<250 mg/day	No	No	<250 mg/day	No	No	Yes	No	No
1	1	160	vt							04_019	02AUG16	02AUG2016			200	04	Early Termination	50	Female		200	Placebo	<250 mg/day	No	No	<250 mg/day	No	No	Yes	No	No
1	1	160	bn	14	VT	146	150	97.3	97.33	04_020	28JUL16	28JUL2016	16SEP16	16SEP2016	196	04	Entered	44	Male	28JUL16	196	MF4637	<250 mg/day	Yes	No	<250 mg/day	No	Yes	Yes	Yes	Yes
2	2	160	VT	25	VT	135	120	112.5	112.5	04_020	16SEP16	16SEP2016	26OCT16	26OCT2016	196	04	Entered	44	Male	28JUL16	196	MF4637	<250 mg/day	Yes	No	<250 mg/day	No	Yes	Yes	Yes	Yes
3	3	160	VT				160			04_020	26OCT16	26OCT2016			196	04	Entered	44	Male	28JUL16	196	MF4637	<250 mg/day	Yes	No	<250 mg/day	No	Yes	Yes	Yes	Yes
4	4	160	VT				74			04_020	26OCT16	26OCT2016			196	04	Entered	44	Male	28JUL16	196	MF4637	<250 mg/day	Yes	No	<250 mg/day	No	Yes	Yes	Yes	Yes
1	1	160	V-T	26	V-T	134	138	97	97.1	04_022	28JUL16	28JUL2016	12SEP16	12SEP2016	199	04	Entered	44	Female	28JUL16	199	Placebo	>=250 mg/day	No	No	>=250 mg/day	No	Yes	Yes	Yes	Yes
2	2	160	V-T	46	V-T	114	114	100	100	04_022	12SEP16	12SEP2016	20OCT16	20OCT2016	199	04	Entered	44	Female	28JUL16	199	Placebo	>=250 mg/day	No	No	>=250 mg/day	No	Yes	Yes	Yes	Yes
3	3	160	vt	0	vt	160	126	127	126.98	04_022	19OCT16	19OCT2016	12JAN17	12JAN2017	199	04	Entered	44	Female	28JUL16	199	Placebo	>=250 mg/day	No	No	>=250 mg/day	No	Yes	Yes	Yes	Yes
4	4	160	vt	78	vt	82	126	65	65.08	04_022	19OCT16	19OCT2016	12JAN17	12JAN2017	199	04	Entered	44	Female	28JUL16	199	Placebo	>=250 mg/day	No	No	>=250 mg/day	No	Yes	Yes	Yes	Yes
1	1	160	V-T	34	VT	126	126	100	100	04_023	17AUG16	17AUG2016	28SEP16	28SEP2016	202	04	Entered	56	Male	17AUG16	202	MF4637	>=250 mg/day	No	No	>=250 mg/day	No	Yes	Yes	Yes	Yes
2	2	160	vt	58	vt	102	126	80	80.95	04_023	28SEP16	28SEP2016	04NOV16	04NOV2016	202	04	Entered	56	Male	17AUG16	202	MF4637	>=250 mg/day	No	No	>=250 mg/day	No	Yes	Yes	Yes	Yes
3	3	160	vt							04_023	04NOV16	04NOV2016			202	04	Entered	56	Male	17AUG16	202	MF4637	>=250 mg/day	No	No	>=250 mg/day	No	Yes	Yes	Yes	Yes
4	4	160	wt	28	vt	132	95	139	138.95	04_023	04NOV16	04NOV2016	27JAN17	27JAN2017	202	04	Entered	56	Male	17AUG16	202	MF4637	>=250 mg/day	No	No	>=250 mg/day	No	Yes	Yes	Yes	Yes
1	1	160	vt	32	vt	128	141	90.78	90.78	04_025	25AUG16	25AUG2016	10OCT16	10OCT2016	203	04	Entered	49	Male	25AUG16	203	MF4637	<250 mg/day	No	No	<250 mg/day	No	Yes	Yes	Yes	Yes
2	2	160	vt	32	vt	128	117	109.4	109.4	04_025	10OCT16	10OCT2016	18NOV16	18NOV2016	203	04	Entered	49	Male	25AUG16	203	MF4637	<250 mg/day	No	No	<250 mg/day	No	Yes	Yes	Yes	Yes
3	3	160	vt				126			04_025	18NOV16	18NOV2016			203	04	Entered	49	Male	25AUG16	203	MF4637	<250 mg/day	No	No	<250 mg/day	No	Yes	Yes	Yes	Yes
4	4	160	vt	60	bn	100	160	62	62.5	04_025	18NOV16	18NOV2016	14FEB17	14FEB2017	203	04	Entered	49	Male	25AUG16	203	MF4637	<250 mg/day	No	No	<250 mg/day	No	Yes	Yes	Yes	Yes
1	1	160	vt							04_027	26AUG16	26AUG2016			201	04	Early Termination	39	Female		201	Placebo	>=250 mg/day	No	No	>=250 mg/day	No	No	Yes	No	No
1	1	160	VT	58	vt	102	102	100	100	04_030	15SEP16	15SEP2016	18OCT16	18OCT2016	216	04	Entered	67	Female	15SEP16	216	MF4637	>=250 mg/day	Yes	No	>=250 mg/day	No	Yes	Yes	Yes	Yes
2	2	160	vt	13	vt	147	147	100	100	04_030	18OCT16	18OCT2016	06DEC16	06DEC2016	216	04	Entered	67	Female	15SEP16	216	MF4637	>=250 mg/day	Yes	No	>=250 mg/day	No	Yes	Yes	Yes	Yes
3	3	160	vt	15	vt	145	160	90.6	90.62	04_030	06DEC16	06DEC2016	28FEB17	28FEB2017	216	04	Entered	67	Female	15SEP16	216	MF4637	>=250 mg/day	Yes	No	>=250 mg/day	No	Yes	Yes	Yes	Yes
4	4	160	vt	3	vt	157	92	170	170.65	04_030	06DEC16	06DEC2016	28FEB17	28FEB2017	216	04	Entered	67	Female	15SEP16	216	MF4637	>=250 mg/day	Yes	No	>=250 mg/day	No	Yes	Yes	Yes	Yes
1	1	160	vt	34	vt	126	126	100	100	04_031	22SEP16	22SEP2016	03NOV16	03NOV2016	217	04	Entered	56	Male	22SEP16	217	Placebo	<250 mg/day	Yes	No	<250 mg/day	No	Yes	Yes	Yes	Yes
2	2	160	VT	55	vt	105	105	100	100	04_031	03NOV16	03NOV2016	08DEC16	08DEC2016	217	04	Entered	56	Male	22SEP16	217	Placebo	<250 mg/day	Yes	No	<250 mg/day	No	Yes	Yes	Yes	Yes
3	3	160	wt	0	vt	160	160	100	100	04_031	08DEC16	08DEC2016	08MAR17	08MAR2017	217	04	Entered	56	Male	22SEP16	217	Placebo	<250 mg/day	Yes	No	<250 mg/day	No	Yes	Yes	Yes	Yes
4	4	160	wt	53	vt	107	160	66.9	66.88	04_031	08DEC16	08DEC2016	08MAR17	08MAR2017	217	04	Entered	56	Male	22SEP16	217	Placebo	<250 mg/day	Yes	No	<250 mg/day	No	Yes	Yes	Yes	Yes
1	1	160	vt							04_032	22SEP16	22SEP2016			218	04	Early Termination	53	Female	22SEP16	218	MF4637	<250 mg/day	No	No	<250 mg/day	No	Yes	Yes	No	No
2	2	160	wt							04_032	03NOV16	03NOV2016			218	04	Early Termination	53	Female	22SEP16	218	MF4637	<250 mg/day	No	No	<250 mg/day	No	Yes	Yes	No	No
1	1	160	vt	31	vt	129	126	102	102.38	04_035	10OCT16	10OCT2016	21NOV16	21NOV2016	219	04	Entered	59	Female	10OCT16	219	Placebo	>=250 mg/day	No	No	>=250 mg/day	No	Yes	Yes	Yes	Yes
2	2	160	vt	31	vt	129	129	100	100	04_035	21NOV16	21NOV2016	03JAN17	03JAN2017	219	04	Entered	59	Female	10OCT16	219	Placebo	>=250 mg/day	No	No	>=250 mg/day	No	Yes	Yes	Yes	Yes
3	3	160	vt	0	vt	160	160	100	100	04_035	03JAN17	03JAN2017	29MAR17	29MAR2017	219	04	Entered	59	Female	10OCT16	219	Placebo	>=250 mg/day	No	No	>=250 mg/day	No	Yes	Yes	Yes	Yes
4	4	160	vt	92	vt	68	98	69	69.39	04_035	03JAN17	03JAN2017	29MAR17	29MAR2017	219	04	Entered	59	Female	10OCT16	219	Placebo	>=250 mg/day	No	No	>=250 mg/day	No	Yes	Yes	Yes	Yes
1	1	160	FH	34	FH	126	126	100	100	09_004	04FEB16	04FEB2016	18MAR16	18MAR2016	164	09	Entered	48	Male	05FEB16	164	Placebo	>=250 mg/day	Yes	Yes	<250 mg/day	No	Yes	Yes	Yes	Yes
2	2	160	FH	34	FH	126	126	100	100	09_004	18MAR16	18MAR2016	29APR16	29APR2016	164	09	Entered	48	Male	05FEB16	164	Placebo	>=250 mg/day	Yes	Yes	<250 mg/day	No	Yes	Yes	Yes	Yes
3	3	160	FH	0	FH	160	160	100	100	09_004	29APR16	29APR2016	29JUL16	29JUL2016	164	09	Entered	48	Male	05FEB16	164	Placebo	>=250 mg/day	Yes	Yes	<250 mg/day	No	Yes	Yes	Yes	Yes
4	4	160	FH	65	FH	95	95	100	100	09_004	29APR16	29APR2016	29JUL16	29JUL2016	164	09	Entered	48	Male	05FEB16	164	Placebo	>=250 mg/day	Yes	Yes	<250 mg/day	No	Yes	Yes	Yes	Yes
1	1	160	FH	34	FH	126	126	100	100	09_005	04FEB16	04FEB2016	11MAR16	11MAR2016	166	09	Entered	53	Male	05FEB16	166	MF4637	>=250 mg/day	Yes	Yes	<250 mg/day	No	Yes	Yes	Yes	Yes
2	2	160	FH	34	FH	126	126	100	100	09_005	18MAR16	18MAR2016	29APR16	29APR2016	166	09	Entered	53	Male	05FEB16	166	MF4637	>=250 mg/day	Yes	Yes	<250 mg/day	No	Yes	Yes	Yes	Yes
3	3	160	FH	0	FH	160	160	100	100	09_005	29APR16	29APR2016	29JUL16	29JUL2016	166	09	Entered	53	Male	05FEB16	166	MF4637	>=250 mg/day	Yes	Yes	<250 mg/day	No	Yes	Yes	Yes	Yes
4	4	160	FH	65	FH	95	95	100	100	09_005	29APR16	29APR2016	29JUL16	29JUL2016	166	09	Entered	53	Male	05FEB16	166	MF4637	>=250 mg/day	Yes	Yes	<250 mg/day	No	Yes	Yes	Yes	Yes
1	1	160	FH	34	FH	126	126	100	100	09_008	04MAR16	04MAR2016	15APR16	15APR2016	165	09	Entered	49	Male	04MAR16	165	Placebo	<250 mg/day	No	No	<250 mg/day	No	Yes	Yes	Yes	Yes
2	2	160	FH	34	FH	126	126	100	100	09_008	15APR16	15APR2016	27MAY16	27MAY2016	165	09	Entered	49	Male	04MAR16	165	Placebo	<250 mg/day	No	No	<250 mg/day	No	Yes	Yes	Yes	Yes
3	3	160	FH	0	FH	160	160	100	100	09_008	27MAY16	27MAY2016	15AUG16	15AUG2016	165	09	Entered	49	Male	04MAR16	165	Placebo	<250 mg/day	No	No	<250 mg/day	No	Yes	Yes	Yes	Yes
4	4	160	FH	65	FH	95	95	100	100	09_008	27MAY16	27MAY2016	15AUG16	15AUG2016	165	09	Entered	49	Male	04MAR16	165	Placebo	<250 mg/day	No	No	<250 mg/day	No	Yes	Yes	Yes	Yes
1	1	160	FH	43	FH	117	117	100	100	09_015	04OCT16	04OCT2016	17NOV16	17NOV2016	167	09	Entered	72	Male	04OCT16	167	MF4637	>=250 mg/day	Yes	No	<250 mg/day	No	Yes	Yes	Yes	Yes
2	2	160	FH	37	FH	123	123	100	100	09_015	17NOV16	17NOV2016	12DEC16	12DEC2016	167	09	Entered	72	Male	04OCT16	167	MF4637	>=250 mg/day	Yes	No	<250 mg/day	No	Yes	Yes	Yes	Yes
3	3	160	FH	0	RA	122	122	100	100	09_015	22DEC16	22DEC2016	23MAR17	23MAR2017	167	09	Entered	72	Male	04OCT16	167	MF4637	>=250 mg/day	Yes	No	<250 mg/day	No	Yes	Yes	Yes	Yes
4	4	160	FH	29	RA	122	122	100	100	09_015	22DEC16	22DEC2016	23MAR17	23MAR2017	167	09	Entered	72	Male	04OCT16	167	MF4637	>=250 mg/day	Yes	No	<250 mg/day	No	Yes	Yes	Yes	Yes
1	1	160	FH	55	FH	105	105	100	100	09_018	14NOV16	14NOV2016	20DEC16	20DEC2016	105	09	Entered	73	Male	14NOV16	105	Placebo	>=250 mg/day	Yes	No	>=250 mg/day	No	Yes	Yes	Yes	Yes
2	2	160	FH	10	FH	150	150	100	100	09_018	20DEC16	20DEC2016	02FEB17	02FEB2017	105	09	Entered	73	Male	14NOV16	105	Placebo	>=250 mg/day	Yes	No	>=250 mg/day	No	Yes	Yes	Yes	Yes
3	3	320	RA	0	RA	160	160	100	100	09_018	09FEB17	09FEB2017	03MAY17	03MAY2017	105	09	Entered	73	Male	14NOV16	105	Placebo	>=250 mg/day	Yes	No	>=250 mg/day	No	Yes	Yes	Yes	Yes
4	4	0	RA	68	RA	252	252	100	100	09_018	09FEB17	09FEB2017	03MAY17	03MAY2017	105	09	Entered	73	Male	14NOV16	105	Placebo	>=250 mg/day	Yes	No	>=250 mg/day	No	Yes	Yes	Yes	Yes
1	1	160	FH	142	FH	186	186	100	100	09_020	14OCT16	14OCT2016	14DEC16	14DEC2016	169	09	Entered	53	Female	14OCT16	169	MF4637	>=250 mg/day	Yes	No	<250 mg/day	No	Yes	Yes	Yes	Yes
2	2	160	FH	71	FH	79	79	100	100	09_020	14DEC16	14DEC2016	11JAN17	11JAN2017	169	09	Entered	53	Female	14OCT16	169	MF4637	>=250 mg/day	Yes	No	<250 mg/day	No	Yes	Yes	Yes	Yes
3	3	160	FH	40	FH	280	280	100	100	09_020	12JAN17	12JAN2017	28MAR17	28MAR2017	169	09	Entered	53	Female	14OCT16	169	MF4637	>=250 mg/day	Yes	No	<250 mg/day	No	Yes	Yes	Yes	Yes
4	4	160	FH	40	FH	270	270	100	100	09_020	12JAN17	12JAN2017	28MAR17	28MAR2017	169	09	Entered	53	Female	14OCT16	169	MF4637	>=250 mg/day	Yes	No	<250 mg/day	No	Yes	Yes	Yes	Yes
1	1	160	FH	28	FH	132	132	100	100	09_021	27OCT16	27OCT2016	16DEC16	16DEC2016	104	09	Entered	54	Male	27OCT16	104	MF4637	>=250 mg/day	No	No	<250 mg/day	No	Yes	Yes	Yes	Yes
2	2	160	FH	37	FH	123	123	100	100	09_021	14DEC16	14DEC2016	24JAN17	24JAN2017	104	09	Entered	54	Male	27OCT16	104	MF4637	>=250 mg/day	No	No	<250 mg/day	No	Yes	Yes	Yes	Yes
3	3	160	FH	34	FH	126	126	100	100	09_021	24JAN17	24JAN2017	19APR17	19APR2017	104	09	Entered	54	Male	27OCT16	104	MF4637	>=250 mg/day	No	No	<250 mg/day	No	Yes	Yes	Yes	Yes
4	4	160	FH	34	FH	126	126	100	100	09_021	24JAN17	24JAN2017	19APR17	19APR2017	104	09	Entered	54	Male	27OCT16	104	MF4637	>=250 mg/day	No	No	<250 mg/day	No	Yes	Yes	Yes	Yes
1	1	160	FH	29	FH	131	131	100	100	09_024	04OCT16	04OCT2016	17NOV16	17NOV2016	168	09	Entered	47	Male	04OCT16	168	Placebo	>=250 mg/day	Yes	No	<250 mg/day	No	Yes	Yes	Yes	No
2	2	160	FH	15	FH	145	145	100	100	09_024	17NOV16	17NOV2016	22DEC16	22DEC2016	168	09	Entered	47	Male	04OCT16	168	Placebo	>=250 mg/day	Yes	No	<250 mg/day	No	Yes	Yes	Yes	No
3	3	160	FH	0	FH	160	160	100	100	09_024	22DEC16	22DEC2016	10APR17	10APR2017	168	09	Entered	47	Male	04OCT16	168	Placebo	>=250 mg/day	Yes	No	<250 mg/day	No	Yes	Yes	Yes	No
4	4	160	FH	62	FH	71	98	72.45	72.45	09_024	22DEC16	22DEC2016	10APR17	10APR2017	168	09	Entered	47	Male	04OCT16	168	Placebo	>=250 mg/day	Yes	No	<250 mg/day	No	Yes	Yes	Yes	No
1	1	160	FH	31	FH	129	129	100	100	09_026	12DEC16	12DEC2016	24JAN17	24JAN2017	171	09	Entered	55	Female	12DEC16	171	Placebo	>=250 mg/day	No	No	<250 mg/day	No	Yes	Yes	Yes	Yes
2	2	160	FH	34	RA	126	126	100	100	09_026	24JAN17	24JAN2017	06MAR17	06MAR2017	171	09	Entered	55	Female	12DEC16	171	Placebo	>=250 mg/day	No	No	<250 mg/day	No	Yes	Yes	Yes	Yes
3	3	160	RA	0	RA	160	160	100	100	09_026	06MAR17	06MAR2017	07JUN17	07JUN2017	171	09	Entered	55	Female	12DEC16	171	Placebo	>=250 mg/day	No	No	<250 mg/day	No	Yes	Yes	Yes	Yes
4	4	160	RA	53	RA	107	107	100	100	09_026	07JUN17	07JUN2017	07JUN17	07JUN2017	171	09	Entered	55	Female	12DEC16	171	Placebo	>=250 mg/day	No	No	<250 mg/day	No	Yes	Yes	Yes	Yes
1	1	160	FH	28	FH	132	132	100	100	09_027	12DEC16	12DEC2016	26JAN17	26JAN2017	107	09	Early Termination	60	Female	12DEC16	107	Placebo	>=250 mg/day	Yes	No	<250 mg/day	No	Yes	Yes	No	No
2	2	160	FH				132			09_027	26JAN17	26JAN2017			107	09	Early Termination	60	Female	12DEC16	107	Placebo	>=250 mg/day	Yes	No	<250 mg/day	No	Yes	Yes	No	No
1	1	160	FH	28	FH	132	132	100	100	09_029	05DEC16	05DEC2016	26JAN17	26JAN2017	106	09	Early Termination	63	Female	12DEC16	106	MF4637	>=250 mg/day	Yes	No	<250 mg/day	No	Yes	Yes	No	No
2	2	160	FH							09_029	26JAN17	26JAN2017			106	09	Early Termination	63	Female	12DEC16	106	MF4637	>=250 mg/day	Yes	No	<250 mg/day	No	Yes	Yes	No	No
1	1	160	FH				123			09_030	12DEC16	12DEC2016			170	09	Entered	59	Female	12DEC16	170	MF4637	>=250 mg/day	No	No	<250 mg/day	No	Yes	Yes	Yes	Yes
2	2	160	FH	0	FH	123	123	100	100	09_030	27JAN17	27JAN2017	31MAY17	31MAY2017	170	09	Entered	59	Female	12DEC16	170	MF4637	>=250 mg/day	No	No	<250 mg/day	No	Yes	Yes	Yes	Yes
3	3	160	FH	37	FH	123	123	100	100	09_030	06MAR17	06MAR2017	31MAY17	31MAY2017	170	09	Entered	59	Female	12DEC16	170	MF4637	>=250 mg/day	No	No	<250 mg/day	No	Yes	Yes	Yes	Yes
4	4	160	FH	71	FH	89	89	100	100	09_030	06MAR17	06MAR2017	31MAY17	31MAY2017	170	09	Entered	59	Female	12DEC16	170	MF4637	>=250 mg/day	No	No	<250 mg/day	No	Yes	Yes	Yes	Yes
1	1	160	RKD	42	RKD	117	126	92.86	92.86	10_004	01FEB16	01FEB2016	14MAR16	14MAR2016	172	10	Entered	47	Male	01FEB16	172	MF4637	>=250 mg/day	No	No	>=250 mg/day	No	Yes	Yes	Yes	Yes
2	2	160	RKD	40	RKD	120	126	95.24	95.24	10_004	14MAR16	14MAR2016	25APR16	25APR2016	172	10	Entered	47	Male	01FEB16	172	MF4637	>=250 mg/day	No	No	>=250 mg/day	No	Yes	Yes	Yes	Yes
3	3	160	RKD	0	RKD	160	160	100	100	10_004	25APR16	25APR2016	18JUL16	18JUL2016	172	10	Entered	47	Male	01FEB16	172	MF4637	>=250 mg/day	No	No	>=250 mg/day	No	Yes	Yes	Yes	Yes
4	4	160	RKD	80	RKD	80	92	86.96	86.96	10_004	25APR16	25APR2016	18JUL16	18JUL2016	172	10	Entered	47	Male	01FEB16	172	MF4637	>=250 mg/day	No	No	>=250 mg/day	No	Yes	Yes	Yes	Yes
1	1	160	RKD	34	RKD	126	129	97.67	97.67	10_006	25FEB16	25FEB2016	08APR16	08APR2016	174	10	Entered	55	Male	25FEB16	174	Placebo	<250 mg/day	No	No	<250 mg/day	No	Yes	Yes	Yes	Yes
2	2	160	RKD	40	RKD	120	123	97.56	97.56	10_006	08APR16	08APR2016	19MAY16	19MAY2016	174	10	Entered	55	Male	25FEB16	174	Placebo	<250 mg/day	No	No	<250 mg/day	No	Yes	Yes	Yes	Yes
3	3	160	RKD	0	RKD	160	160	100	100	10_006	19MAY16	19MAY2016	09AUG16	09AUG2016	174	10	Entered	55	Male	25FEB16	174	Placebo	<250 mg/day	No	No	<250 mg/day	No	Yes	Yes	Yes	Yes
4	4	160	RKD	77	RKD	83	86	96.51	96.51	10_006	19MAY16	19MAY2016	09AUG16	09AUG2016	174	10	Entered	55	Male	25FEB16	174	Placebo	<250 mg/day	No	No	<250 mg/day	No	Yes	Yes	Yes	Yes
1	1	160	RKD	30	RKD	129	126	102.38	102.38	10_007	01MAR16	01MAR2016	12APR16	12APR2016	173	10	Entered	54	Female	01MAR16	173	MF4637	<250 mg/day	No	Yes	<250 mg/day	No	Yes	Yes	Yes	Yes
2	2	160	RKD	37	RKD	123	126	97.62	97.62	10_007	12APR16	12APR2016	24MAY16	24MAY2016	173	10	Entered	54	Female	01MAR16	173	MF4637	<250 mg/day	No	Yes	<250 mg/day	No	Yes	Yes	Yes	Yes
3	3	160	RKD	0	RKD	160	160	100	100	10_007	24MAY16	24MAY2016	23AUG16	23AUG2016	173	10	Entered	54	Female	01MAR16	173	MF4637	<250 mg/day	No	Yes	<250 mg/day	No	Yes	Yes	Yes	Yes
4	4	160	RKD	47	RKD	113	113	100	100	10_007	24MAY16	24MAY2016	23AUG16	23AUG2016	173	10	Entered	54	Female	01MAR16	173	MF4637	<250 mg/day	No	Yes	<250 mg/day	No	Yes	Yes	Yes	Yes
1	1	160	RKD	34	RKD	126	126	100	100	10_009	27JUN16	27JUN2016	08AUG16	08AUG2016	176	10	Entered	64	Female	27JUN16	176	MF4637	<250 mg/day	No	No	<250 mg/day	No	Yes	Yes	Yes	Yes
2	2	160	RKD	40	RKD	120	126	95.24	95.24	10_009	08AUG16	08AUG2016	19SEP16	19SEP2016	176	10	Entered	64	Female	27JUN16	176	MF4637	<250 mg/day	No	No	<250 mg/day	No	Yes	Yes	Yes	Yes
3	3	160	RKD	0	RKD	160	160	100	100	10_009	19SEP16	19SEP2016	12DEC16	12DEC2016	176	10	Entered	64	Female	27JUN16	176	MF4637	<250 mg/day	No	No	<250 mg/day	No	Yes	Yes	Yes	Yes
4	4	160	RKD	86	RKD	74	92	80.43	80.43	10_009	19SEP16	19SEP2016	12DEC16	12DEC2016	176	10	Entered	64	Female	27JUN16	176	MF4637	<250 mg/day	No	No	<250 mg/day	No	Yes	Yes	Yes	Yes
1	1	160	RKD	91	RKD	69	147	46.94	46.94	10_010	27SEP16	27SEP2016	15MAR17	15MAR2017	175	10	Entered	34	Male	27SEP16	175	Placebo	>=250 mg/day	No	No	>=250 mg/day	No	Yes	Yes	Yes	Yes
2	2	160	RKD	64	RKD	96	108	88.89	88.89	10_010	15NOV16	15NOV2016	21DEC16	21DEC2016	175	10	Entered	34	Male	27SEP16	175	Placebo	>=250 mg/day	No	No	>=250 mg/day	No	Yes	Yes	Yes	Yes
3	3	160	RKD	0	RKD	160	160	100	100	10_010	21DEC16	21DEC2016	15MAR17	15MAR2017	175	10	Entered	34	Male	27SEP16	175	Placebo	>=250 mg/day	No	No	>=250 mg/day	No	Yes	Yes	Yes	Yes
4	4	160	RKD	92	RKD	68	92	73.91	73.91	10_010	21DEC16	21DEC2016	15MAR17	15MAR2017	175	10	Entered	34	Male	27SEP16	175	Placebo	>=250 mg/day	No	No	>=250 mg/day	No	Yes	Yes	Yes	Yes
1	1	160	RKD	40	RKD	120	123	97.56	97.56	10_012	12OCT16	12OCT2016	22NOV16	22NOV2016	177	10	Entered	53	Male	12OCT16	177	Placebo	<250 mg/day	No	Yes	<250 mg/day	No	Yes	Yes	Yes	Yes
2	2	160	RKD	34	RKD	126	129	97.67	97.67	10_012	22NOV16	22NOV2016	04JAN17	04JAN2017	177	10	Entered	53	Male	12OCT16	177	Placebo	<250 mg/day	No	Yes	<250 mg/day	No	Yes	Yes	Yes	Yes
3	3	160	RKD	0	RKD	160	160	100	100	10_012	04JAN17	04JAN2017	28MAR17	28MAR2017	177	10	Entered	53	Male	12OCT16	177	Placebo	<250 mg/day	No	Yes	<250 mg/day	No	Yes	Yes	Yes	Yes
4	4	160	RKD	68	RKD	92	89	103.37	103.37	10_012	04JAN17	04JAN2017	28MAR17	28MAR2017	177	10	Entered	53	Male	12OCT16	177	Placebo	<250 mg/day	No	Yes	<250 mg/day	No	Yes	Yes	Yes	Yes
1	1	160	CPC	40	CPC	120	141	83.3	85.11	11_003	15SEP16	15SEP2016	01NOV16	01NOV2016	142	11	Early Termination	52	Male	15SEP16	142	Placebo	<250 mg/day	Yes	Yes	>=250 mg/day	No	Yes	Yes	Yes	Yes
2	2	160	CPC	31	CPC	129	123	104.87	104.88	11_003	01NOV16	01NOV2016	12DEC16	12DEC2016	142	11	Early Termination	52	Male	15SEP16	142	Placebo	<250 mg/day	Yes	Yes	>=250 mg/day	No	Yes	Yes	Yes	Yes
3	3	160	CPC							11_003	12DEC16	12DEC2016			142	11	Early Termination	52	Male	15SEP16	142	Placebo	<250 mg/day	Yes	Yes	>=250 mg/day	No	Yes	Yes	Yes	Yes
4	4	160	CPC							11_003	12DEC16	12DEC2016			142	11	Early Termination	52	Male	15SEP16	142	Placebo	<250 mg/day	Yes	Yes	>=250 mg/day	No	Yes	Yes	Yes	Yes
1	1	160	CPC	22	CPC	138	138	100	100	11_004	02SEP16	02SEP2016	17OCT16	17OCT2016	140	11	Entered	42	Female	02SEP16	140	MF4637	<250 mg/day	Yes	No	<250 mg/day	No	Yes	Yes	Yes	Yes
2	2	160	CPC	34	CPC	126	126	100	100	11_004	17OCT16	17OCT2016	28NOV16	28NOV2016	140	11	Entered	42	Female	02SEP16	140	MF4637	<250 mg/day	Yes	No	<250 mg/day	No	Yes	Yes	Yes	Yes
3	3	160	KC	0	CPC	160	160	100	100	11_004	28NOV16	28NOV2016	16FEB17	16FEB2017	140	11	Entered	42	Female	02SEP16	140	MF4637	<250 mg/day	Yes	No	<250 mg/day	No	Yes	Yes	Yes	Yes
4	4	160	KC	80	CPC	80	84	95.23	95.24	11_004	28NOV16	28NOV2016	16FEB17	16FEB2017	140	11	Entered	42	Female	02SEP16	140	MF4637	<250 mg/day	Yes	No	<250 mg/day	No	Yes	Yes	Yes	Yes
1	1	160	CPC	6	CPC	154	135	114.07	114.07	11_005	26SEP16	26SEP2016	10NOV16	10NOV2016	141	11	Early Termination	63	Male	26SEP16	141	MF4637	>=250 mg/day	No	No	>=250 mg/day	No	Yes	Yes	No	No
2	2	160	CPC	108	KC	52	160	32.5	32.5	11_005	10NOV16	10NOV2016	08MAR17	08MAR2017	141	11	Early Termination	63	Male	26SEP16	141	MF4637	>=250 mg/day	No	No	>=250 mg/day	No	Yes	Yes	No	No
1	1	160	CPC	31	CPC	129	126	102.38	102.38	11_006	29SEP16	29SEP2016	10NOV16	10NOV2016	146	11	Entered	54	Female	29SEP16	146	Placebo	<250 mg/day	Yes	No	>=250 mg/day	No	Yes	Yes	Yes	Yes
2	2	160	CPC	0	CPC	159	207	76.81	76.81	11_006	10NOV16	10NOV2016	18JAN17	18JAN2017	146	11	Entered	54	Female	29SEP16	146	Placebo	<250 mg/day	Yes	No	>=250 mg/day	No	Yes	Yes	Yes	Yes
3	3	160	CPC	157	KC	3	11	27.2	27.27	11_006	18JAN17	18JAN2017	16MAR17	16MAR2017	146	11	Entered	54	Female	29SEP16	146	Placebo	<250 mg/day	Yes	No	>=250 mg/day	No	Yes	Yes	Yes	Yes
4	4	160	CPC	19	KC	141	160	88.1	88.12	11_006	18JAN17	18JAN2017	16MAR17	16MAR2017	146	11	Entered	54	Female	29SEP16	146	Placebo	<250 mg/day	Yes	No	>=250 mg/day	No	Yes	Yes	Yes	Yes
1	1	160	CPC	52	KC	108	123	87.8	87.8	11_008	27SEP16	27SEP2016	07NOV16	07NOV2016	144	11	Entered	42	Male	27SEP16	144	MF4637	<250 mg/day	No	No	>=250 mg/day	No	Yes	Yes	Yes	Yes
2	2	160	KC	46	KC	114	132	86.36	86.36	11_008	07NOV16	07NOV2016	20DEC16	20DEC2016	144	11	Entered	42	Male	27SEP16	144	MF4637	<250 mg/day	No	No	>=250 mg/day	No	Yes	Yes	Yes	Yes
3	3	160	KC	0	KC	160	160	100	100	11_008	20DEC16	20DEC2016	14MAR17	14MAR2017	144	11	Entered	42	Male	27SEP16	144	MF4637	<250 mg/day	No	No	>=250 mg/day	No	Yes	Yes	Yes	Yes
4	4	160	KC	74	KC	86	92	93.47	93.48	11_008	20DEC16	20DEC2016	14MAR17	14MAR2017	144	11	Entered	42	Male	27SEP16	144	MF4637	<250 mg/day	No	No	>=250 mg/day	No	Yes	Yes	Yes	Yes
1	1	160	CPC	49	KC	111	114	97.36	97.37	11_009	30SEP16	30SEP2016	07NOV16	07NOV2016	147	11	Entered	50	Female	01OCT16	147	Placebo	<250 mg/day	No	No	<250 mg/day	No	Yes	Yes	Yes	Yes
2	2	160	KC	46	KC	114	117	97.43	97.44	11_009	07NOV16	07NOV2016	16DEC16	16DEC2016	147	11	Entered	50	Female	01OCT16	147	Placebo	<250 mg/day	No	No	<250 mg/day	No	Yes	Yes	Yes	Yes
3	3	160	KC	0	KC	160	160	100	100	11_009	16DEC16	16DEC2016	16MAR17	16MAR2017	147	11	Entered	50	Female	01OCT16	147	Placebo	<250 mg/day	No	No	<250 mg/day	No	Yes	Yes	Yes	Yes
4	4	160	KC	50	KC	110	110	100	100	11_009	16DEC16	16DEC2016	16MAR17	16MAR2017	147	11	Entered	50	Female	01OCT16	147	Placebo	<250 mg/day	No	No	<250 mg/day	No	Yes	Yes	Yes	Yes
1	1	160	CPC	37	KC	123	123	100	100	11_010	27SEP16	27SEP2016	07NOV16	07NOV2016	143	11	Entered	52	Female	27SEP16	143	Placebo	<250 mg/day	No	Yes	<250 mg/day	No	Yes	Yes	Yes	Yes
2	2	160	KC	49	KC	111	126	88.09	88.1	11_010	07NOV16	07NOV2016	19DEC16	19DEC2016	143	11	Entered	52	Female	27SEP16	143	Placebo	<250 mg/day	No	Yes	<250 mg/day	No	Yes	Yes	Yes	Yes
3	3	160	KC	0	PCP	160	160	100	100	11_010	19DEC16	19DEC2016	13MAR17	13MAR2017	143	11	Entered	52	Female	27SEP16	143	Placebo	<250 mg/day	No	Yes	<250 mg/day	No	Yes	Yes	Yes	Yes
4	4	160	KC	85	PCP	75	92	81.52	81.52	11_010	19DEC16	19DEC2016	13MAR17	13MAR2017	143	11	Entered	52	Female	27SEP16	143	Placebo	<250 mg/day	No	Yes	<250 mg/day	No	Yes	Yes	Yes	Yes
1	1	160	CPC	40	KC	120	126	95.23	95.24	11_011	17OCT16	17OCT2016	28NOV16	28NOV2016	244	11	Entered	41	Female	19OCT16	244	Placebo	<250 mg/day	No	No	>=250 mg/day	No	Yes	Yes	Yes	Yes
2	2	160	KC	50	KC	110	126	87.3	87.3	11_011	28NOV16	28NOV2016	09JAN17	09JAN2017	244	11	Entered	41	Female	19OCT16	244	Placebo	<250 mg/day	No	No	>=250 mg/day	No	Yes	Yes	Yes	Yes
3	3	160	KC	0	CPC	160	160	100	100	11_011	09JAN17	09JAN2017	30MAR17	30MAR2017	244	11	Entered	41	Female	19OCT16	244	Placebo	<250 mg/day	No	No	>=250 mg/day	No	Yes	Yes	Yes	Yes
4	4	160	KC	142	CPC	18	80	22.5	22.5	11_011	09JAN17	09JAN2017	30MAR17	30MAR2017	244	11	Entered	41	Female	19OCT16	244	Placebo	<250 mg/day	No	No	>=250 mg/day	No	Yes	Yes	Yes	Yes
1	1	160	CPC	55	CPC	105	126	83.33	83.33	11_012	17OCT16	17OCT2016	28NOV16	28NOV2016	145	11	Entered	40	Female	18OCT16	145	MF4637	<250 mg/day	No	No	<250 mg/day	No	Yes	Yes	Yes	Yes
2	2	160	CPC	55	KC	105	108	97.2	97.22	11_012	28NOV16	28NOV2016	03JAN17	03JAN2017	145	11	Entered	40	Female	18OCT16	145	MF4637	<250 mg/day	No	No	<250 mg/day	No	Yes	Yes	Yes	Yes
3	3	160	KC	0	KC	160	160	100	100	11_012	03JAN17	03JAN2017	06APR17	06APR2017	145	11	Entered	40	Female	18OCT16	145	MF4637	<250 mg/day	No	No	<250 mg/day	No	Yes	Yes	Yes	Yes
4	4	160	KC	56	KC	104	119	87.39	87.39	11_012	03JAN17	03JAN2017	06APR17	06APR2017	145	11	Entered	40	Female	18OCT16	145	MF4637	<250 mg/day	No	No	<250 mg/day	No	Yes	Yes	Yes	Yes
1	1	160	CPC	6	CPC	154	198	77.77	77.78	11_014	16NOV16	16NOV2016	21FEB17	21FEB2017	247	11	Entered	49	Female	17NOV16	247	Placebo	>=250 mg/day	No	No	>=250 mg/day	No	Yes	Yes	Yes	No
2	2	160	CPC	76	CPC	85	102	83.3	83.33	11_014	18JAN17	18JAN2017	21FEB17	21FEB2017	247	11	Entered	49	Female	17NOV16	247	Placebo	>=250 mg/day	No	No	>=250 mg/day	No	Yes	Yes	Yes	No
3	3	160	CPC	0	CPC	160	160	100	100	11_014	21FEB17	21FEB2017	04MAY17	04MAY2017	247	11	Entered	49	Female	17NOV16	247	Placebo	>=250 mg/day	No	No	>=250 mg/day	No	Yes	Yes	Yes	No
4	4	160	CPC	143	CPC	17	56	30.35	30.36	11_014	21FEB17	21FEB2017	04MAY17	04MAY2017	247	11	Entered	49	Female	17NOV16	247	Placebo	>=250 mg/day	No	No	>=250 mg/day	No	Yes	Yes	Yes	No
1	1	160	CPC	46	KC	114	117	97.4	97.44	11_015	10NOV16	10NOV2016	19DEC16	19DEC2016	245	11	Entered	62	Male	10NOV16	245	MF4637	<250 mg/day	No	No	>=250 mg/day	No	Yes	Yes	Yes	Yes
2	2	160	KC	36	KC	124	129	96.12	96.12	11_015	19DEC16	19DEC2016	31JAN17	31JAN2017	245	11	Entered	62	Male	10NOV16	245	MF4637	<250 mg/day	No	No	>=250 mg/day	No	Yes	Yes	Yes	Yes
3	3	160	KC	0	KC	160	160	100	100	11_015	31JAN17	31JAN2017	26APR17	26APR2017	245	11	Entered	62	Male	10NOV16	245	MF4637	<250 mg/day	No	No	>=250 mg/day	No	Yes	Yes	Yes	Yes
4	4	160	KC	108	KC	52	95	54.73	54.74	11_015	31JAN17	31JAN2017	26APR17	26APR2017	245	11	Entered	62	Male	10NOV16	245	MF4637	<250 mg/day	No	No	>=250 mg/day	No	Yes	Yes	Yes	Yes
1	1	160	CPC	64	CPC	96	111	86.4	86.49	11_017	28NOV16	28NOV2016	04JAN17	04JAN2017	246	11	Entered	32	Female	28NOV16	246	MF4637	<250 mg/day	No	No	<250 mg/day	No	Yes	Yes	Yes	Yes
2	2	160	CPC	67	KC	93	126	73.8	73.81	11_017	04JAN17	04JAN2017	15FEB17	15FEB2017	246	11	Entered	32	Female	28NOV16	246	MF4637	<250 mg/day	No	No	<250 mg/day	No	Yes	Yes	Yes	Yes
3	3	160	KC	0	CPC	160	160	100	100	11_017	15FEB17	15FEB2017	12MAY17	12MAY2017	246	11	Entered	32	Female	28NOV16	246	MF4637	<250 mg/day	No	No	<250 mg/day	No	Yes	Yes	Yes	Yes
4	4	160	KC	73	CPC	87	101	86.14	86.14	11_017	15FEB17	15FEB2017	12MAY17	12MAY2017	246	11	Entered	32	Female	28NOV16	246	MF4637	<250 mg/day	No	No	<250 mg/day	No	Yes	Yes	Yes	Yes
1	1	160	CPC	49	KC	111	108	102.7	102.78	11_018	28NOV16	28NOV2016	03JAN17	03JAN2017	248	11	Entered	45	Female	29NOV16	248	Placebo	<250 mg/day	No	No	>=250 mg/day	No	Yes	Yes	Yes	Yes
2	2	160	KC	13	CPC	147	144	102.08	102.08	11_018	03JAN17	03JAN2017	20FEB17	20FEB2017	248	11	Entered	45	Female	29NOV16	248	Placebo	<250 mg/day	No	No	>=250 mg/day	No	Yes	Yes	Yes	Yes
3	3	160	CPC	0	CPC	160	160	100	100	11_018	20FEB17	20FEB2017	12MAY17	12MAY2017	248	11	Entered	45	Female	29NOV16	248	Placebo	<250 mg/day	No	No	>=250 mg/day	No	Yes	Yes	Yes	Yes
4	4	160	CPC	69	CPC	91	83	109.63	109.64	11_018	20FEB17	20FEB2017	12MAY17	12MAY2017	248	11	Entered	45	Female	29NOV16	248	Placebo	<250 mg/day	No	No	>=250 mg/day	No	Yes	Yes	Yes	Yes
1	1	160	D-P	40	GYP	120	120	100	100	12_001	14OCT16	14OCT2016	22NOV16	22NOV2016	257	12	Entered	66	Male	14OCT16	257	MF4637	>=250 mg/day	Yes	Yes	>=250 mg/day	No	Yes	Yes	Yes	Yes
2	2	160	GYP	19	GYP	141	141	100	100	12_001	22NOV16	22NOV2016	09JAN17	09JAN2017	257	12	Entered	66	Male	14OCT16	257	MF4637	>=250 mg/day	Yes	Yes	>=250 mg/day	No	Yes	Yes	Yes	Yes
3	3	160	GYP	1	GYP	159	159	100	100	12_001	09JAN17	09JAN2017	29MAR17	29MAR2017	257	12	Entered	66	Male	14OCT16	257	MF4637	>=250 mg/day	Yes	Yes	>=250 mg/day	No	Yes	Yes	Yes	Yes
4	4	160	GYP	82	GYP	78	78	100	100	12_001	09JAN17	09JAN2017	29MAR17	29MAR2017	257	12	Entered	66	Male	14OCT16	257	MF4637	>=250 mg/day	Yes	Yes	>=250 mg/day	No	Yes	Yes	Yes	Yes
1	1	160	D-P	49	GYP	111	117	94.87	94.87	12_003	11OCT16	11OCT2016	18NOV16	18NOV2016	138	12	Entered	52	Male	11OCT16	138	Placebo	>=250 mg/day	Yes	No	>=250 mg/day	No	Yes	Yes	Yes	Yes
2	2	160	GYP	19	GYP	141	144	97.92	97.92	12_003	18NOV16	18NOV2016	06JAN17	06JAN2017	138	12	Entered	52	Male	11OCT16	138	Placebo	>=250 mg/day	Yes	No	>=250 mg/day	No	Yes	Yes	Yes	Yes
3	3	160	GYP	0	GYP	159	159	100	100	12_003	06JAN17	06JAN2017	28MAR17	28MAR2017	138	12	Entered	52	Male	11OCT16	138	Placebo	>=250 mg/day	Yes	No	>=250 mg/day	No	Yes	Yes	Yes	Yes
4	4	160	GYP	85	GYP	75	84	89.29	89.29	12_003	06JAN17	06JAN2017	28MAR17	28MAR2017	138	12	Entered	52	Male	11OCT16	138	Placebo	>=250 mg/day	Yes	No	>=250 mg/day	No	Yes	Yes	Yes	Yes
1	1	160	D-P	36	D-P	123	123	100	100	12_004	22SEP16	22SEP2016	01NOV16	01NOV2016	133	12	Entered	70	Male	22SEP16	133	Placebo	>=250 mg/day	Yes	Yes	>=250 mg/day	No	Yes	Yes	Yes	Yes
2	2	160	GYP	31	GYP	129	129	100	100	12_004	01NOV16	01NOV2016	15DEC16	15DEC2016	133	12	Entered	70	Male	22SEP16	133	Placebo	>=250 mg/day	Yes	Yes	>=250 mg/day	No	Yes	Yes	Yes	Yes
3	3	160	GYP	1	GYP	159	159	100	100	12_004	15DEC16	15DEC2016	14MAR17	14MAR2017	133	12	Entered	70	Male	22SEP16	133	Placebo	>=250 mg/day	Yes	Yes	>=250 mg/day	No	Yes	Yes	Yes	Yes
4	4	160	GYP	58	GYP	102	108	94.44	94.44	12_004	15DEC16	15DEC2016	14MAR17	14MAR2017	133	12	Entered	70	Male	22SEP16	133	Placebo	>=250 mg/day	Yes	Yes	>=250 mg/day	No	Yes	Yes	Yes	Yes
1	1	160	DP	40	GYP	120	123	97.56	97.56	12_006	22SEP16	22SEP2016	01NOV16	01NOV2016	132	12	Entered	76	Female	22SEP16	132	MF4637	<250 mg/day	Yes	Yes	<250 mg/day	No	Yes	Yes	Yes	Yes
2	2	160	GYP	39	GYP	121	129	93.8	93.8	12_006	01NOV16	01NOV2016	15DEC16	15DEC2016	132	12	Entered	76	Female	22SEP16	132	MF4637	<250 mg/day	Yes	Yes	<250 mg/day	No	Yes	Yes	Yes	Yes
3	3	160	GYP	1	GYP	159	159	100	100	12_006	15DEC16	15DEC2016	13MAR17	13MAR2017	132	12	Entered	76	Female	22SEP16	132	MF4637	<250 mg/day	Yes	Yes	<250 mg/day	No	Yes	Yes	Yes	Yes
4	4	160	GYP	55	GYP	105	105	100	100	12_006	15DEC16	15DEC2016	13MAR17	13MAR2017	132	12	Entered	76	Female	22SEP16	132	MF4637	<250 mg/day	Yes	Yes	<250 mg/day	No	Yes	Yes	Yes	Yes
1	1	160	GYP	39	GYP	121	129	93.8	93.8	12_007	30SEP16	30SEP2016	11NOV16	11NOV2016	134	12	Entered	64	Female	30SEP16	134	Placebo	>=250 mg/day	No	Yes	>=250 mg/day	No	Yes	Yes	Yes	Yes
2	2	160	GYP	43	GYP	117	120	97.5	97.5	12_007	11NOV16	11NOV2016	22DEC16	22DEC2016	134	12	Entered	64	Female	30SEP16	134	Placebo	>=250 mg/day	No	Yes	>=250 mg/day	No	Yes	Yes	Yes	Yes
3	3	160	GYP	1	GYP	159	159	100	100	12_007	22DEC16	22DEC2016	14MAR17	14MAR2017	134	12	Entered	64	Female	30SEP16	134	Placebo	>=250 mg/day	No	Yes	>=250 mg/day	No	Yes	Yes	Yes	Yes
4	4	160	GYP	101	GYP	59	87	67.82	67.82	12_007	22DEC16	22DEC2016	14MAR17	14MAR2017	134	12	Entered	64	Female	30SEP16	134	Placebo	>=250 mg/day	No	Yes	>=250 mg/day	No	Yes	Yes	Yes	Yes
1	1	160	D-P	51	GYP	109	129	84.5	84.5	12_009	26OCT16	26OCT2016	07DEC16	07DEC2016	260	12	Early Termination	53	Female	26OCT16	260	MF4637	>=250 mg/day	Yes	Yes	>=250 mg/day	No	Yes	Yes	Yes	Yes
2	2	160	GYP	121	GYP	39	39	100	100	12_009	06DEC16	06DEC2016	27DEC16	27DEC2016	260	12	Early Termination	53	Female	26OCT16	260	MF4637	>=250 mg/day	Yes	Yes	>=250 mg/day	No	Yes	Yes	Yes	Yes
1	1	160	D-P	32	GYP	128	129	99.2	99.22	12_013	30SEP16	30SEP2016	11NOV16	11NOV2016	137	12	Entered	52	Female	30SEP16	137	MF4637	>=250 mg/day	No	Yes	>=250 mg/day	No	Yes	Yes	Yes	Yes
2	2	160	GYP	25	A-M	135	138	97.83	97.83	12_013	11NOV16	11NOV2016	27DEC16	27DEC2016	137	12	Entered	52	Female	30SEP16	137	MF4637	>=250 mg/day	No	Yes	>=250 mg/day	No	Yes	Yes	Yes	Yes
3	3	160	A-M	1	GYP	159	159	100	100	12_013	27DEC16	27DEC2016	06APR17	06APR2017	137	12	Entered	52	Female	30SEP16	137	MF4637	>=250 mg/day	No	Yes	>=250 mg/day	No	Yes	Yes	Yes	Yes
4	4	160	A-M	62	GYP	99	141	70.21	70.21	12_013	27DEC16	27DEC2016	06APR17	06APR2017	137	12	Entered	52	Female	30SEP16	137	MF4637	>=250 mg/day	No	Yes	>=250 mg/day	No	Yes	Yes	Yes	Yes
1	1	160	D-P	59	D-P	101	129	78.29	78.29	12_014	30SEP16	30SEP2016	11NOV16	11NOV2016	136	12	Entered	66	Female	30SEP16	136	Placebo	>=250 mg/day	Yes	Yes	>=250 mg/day	No	Yes	Yes	Yes	Yes
2	2	160	D-P	62	GYP	98	117	83.76	83.76	12_014	11NOV16	11NOV2016	21DEC16	21DEC2016	136	12	Entered	66	Female	30SEP16	136	Placebo	>=250 mg/day	Yes	Yes	>=250 mg/day	No	Yes	Yes	Yes	Yes
3	3	160	GYP	1	GYP	159	159	100	100	12_014	21DEC16	21DEC2016	14MAR17	14MAR2017	136	12	Entered	66	Female	30SEP16	136	Placebo	>=250 mg/day	Yes	Yes	>=250 mg/day	No	Yes	Yes	Yes	Yes
4	4	160	GYP	77	GYP	83	90	92.22	92.22	12_014	21DEC16	21DEC2016	14MAR17	14MAR2017	136	12	Entered	66	Female	30SEP16	136	Placebo	>=250 mg/day	Yes	Yes	>=250 mg/day	No	Yes	Yes	Yes	Yes
1	1	160	D-P	34	D-P	126	129	97.67	97.67	12_015	30SEP16	30SEP2016	11NOV16	11NOV2016	135	12	Early Termination	47	Female	30SEP16	135	MF4637	>=250 mg/day	Yes	Yes	>=250 mg/day	No	Yes	Yes	Yes	Yes
2	2	160	D-P	0	GYP	160	246	65.04	65.04	12_015	11NOV16	11NOV2016	01FEB17	01FEB2017	135	12	Early Termination	47	Female	30SEP16	135	MF4637	>=250 mg/day	Yes	Yes	>=250 mg/day	No	Yes	Yes	Yes	Yes
1	1	160	D-P	31	GYP	129	129	100	100	12_016	05OCT16	05OCT2016	15NOV16	15NOV2016	103	12	Entered	52	Female	05OCT16	103	MF4637	<250 mg/day	No	No	<250 mg/day	No	Yes	Yes	Yes	Yes
2	2	160	GYP	40	GYP	120	120	100	100	12_016	15NOV16	15NOV2016	27DEC16	27DEC2016	103	12	Entered	52	Female	05OCT16	103	MF4637	<250 mg/day	No	No	<250 mg/day	No	Yes	Yes	Yes	Yes
3	3	160	GYP	1	GYP	159	159	100	100	12_016	27DEC16	27DEC2016	21MAR17	21MAR2017	103	12	Entered	52	Female	05OCT16	103	MF4637	<250 mg/day	No	No	<250 mg/day	No	Yes	Yes	Yes	Yes
4	4	160	GYP	62	GYP	93	93	100	100	12_016	27DEC16	27DEC2016	21MAR17	21MAR2017	103	12	Entered	52	Female	05OCT16	103	MF4637	<250 mg/day	No	No	<250 mg/day	No	Yes	Yes	Yes	Yes
1	1	160	D-P	34	GYP	126	129	97.67	97.67	12_017	05OCT16	05OCT2016	17NOV16	17NOV2016	100	12	Entered	57	Female	05OCT16	100	Placebo	>=250 mg/day	Yes	Yes	>=250 mg/day	No	Yes	Yes	Yes	Yes
2	2	160	GYP	45	GYP	115	123	93.5	93.5	12_017	17NOV16	17NOV2016	28DEC16	28DEC2016	100	12	Entered	57	Female	05OCT16	100	Placebo	>=250 mg/day	Yes	Yes	>=250 mg/day	No	Yes	Yes	Yes	Yes
3	3	160	GYP	1	GYP	159	159	100	100	12_017	28DEC16	28DEC2016	21MAR17	21MAR2017	100	12	Entered	57	Female	05OCT16	100	Placebo	>=250 mg/day	Yes	Yes	>=250 mg/day	No	Yes	Yes	Yes	Yes
4	4	160	GYP	70	GYP	90	90	100	100	12_017	28DEC16	28DEC2016	21MAR17	21MAR2017	100	12	Entered	57	Female	05OCT16	100	Placebo	>=250 mg/day	Yes	Yes	>=250 mg/day	No	Yes	Yes	Yes	Yes
1	1	160	D-P	56	D-P	104	129	80.62	80.62	12_019	05OCT16	05OCT2016	16NOV16	16NOV2016	102	12	Entered	53	Male	05OCT16	102	Placebo	<250 mg/day	Yes	Yes	<250 mg/day	No	Yes	Yes	Yes	Yes
2	2	160	GYP	49	GYP	111	123	90.24	90.24	12_019	16NOV16	16NOV2016	28DEC16	28DEC2016	102	12	Entered	53	Male	05OCT16	102	Placebo	<250 mg/day	Yes	Yes	<250 mg/day	No	Yes	Yes	Yes	Yes
3	3	160	GYP	1	GYP	159	159	100	100	12_019	28DEC16	28DEC2016	21MAR17	21MAR2017	102	12	Entered	53	Male	05OCT16	102	Placebo	<250 mg/day	Yes	Yes	<250 mg/day	No	Yes	Yes	Yes	Yes
4	4	160	GYP	86	GYP	74	90	82.22	82.22	12_019	28DEC16	28DEC2016	21MAR17	21MAR2017	102	12	Entered	53	Male	05OCT16	102	Placebo	<250 mg/day	Yes	Yes	<250 mg/day	No	Yes	Yes	Yes	Yes
1	1	160	D-P	37	GYP	123	129	95.35	95.35	12_020	05OCT16	05OCT2016	17NOV16	17NOV2016	101	12	Entered	60	Female	05OCT16	101	MF4637	>=250 mg/day	Yes	Yes	>=250 mg/day	No	Yes	Yes	Yes	Yes
2	2	160	GYP	37	GYP	123	123	100	100	12_020	17NOV16	17NOV2016	28DEC16	28DEC2016	101	12	Entered	60	Female	05OCT16	101	MF4637	>=250 mg/day	Yes	Yes	>=250 mg/day	No	Yes	Yes	Yes	Yes
3	3	160	GYP	1	GYP	159	159	100	100	12_020	28DEC16	28DEC2016	21MAR17	21MAR2017	101	12	Entered	60	Female	05OCT16	101	MF4637	>=250 mg/day	Yes	Yes	>=250 mg/day	No	Yes	Yes	Yes	Yes
4	4	160	GYP	70	GYP	90	90	100	100	12_020	28DEC16	28DEC2016	21MAR17	21MAR2017	101	12	Entered	60	Female	05OCT16	101	MF4637	>=250 mg/day	Yes	Yes	>=250 mg/day	No	Yes	Yes	Yes	Yes
1	1	160	D-P	47	GYP	113	117	96.58	96.58	12_021	11OCT16	11OCT2016	18NOV16	18NOV2016	254	12	Entered	54	Male	11OCT16	254	MF4637	>=250 mg/day	Yes	Yes	>=250 mg/day	No	Yes	Yes	Yes	Yes
2	2	160	GYP	25	GYP	135	135	100	100	12_021	18NOV16	18NOV2016	03JAN17	03JAN2017	254	12	Entered	54	Male	11OCT16	254	MF4637	>=250 mg/day	Yes	Yes	>=250 mg/day	No	Yes	Yes	Yes	Yes
3	3	160	GYP	1	GYP	159	159	100	100	12_021	03JAN17	03JAN2017	20APR17	20APR2017	254	12	Entered	54	Male	11OCT16	254	MF4637	>=250 mg/day	Yes	Yes	>=250 mg/day	No	Yes	Yes	Yes	Yes
4	4	160	GYP	3	GYP	157	162	96.91	96.91	12_021	03JAN17	03JAN2017	20APR17	20APR2017	254	12	Entered	54	Male	11OCT16	254	MF4637	>=250 mg/day	Yes	Yes	>=250 mg/day	No	Yes	Yes	Yes	Yes
1	1	160	D-P	37	GYP	123	123	100	100	12_022	12OCT16	12OCT2016	21NOV16	21NOV2016	253	12	Entered	43	Male	12OCT16	253	Placebo	<250 mg/day	Yes	No	<250 mg/day	No	Yes	Yes	Yes	Yes
2	2	160	GYP	31	GYP	129	129	100	100	12_022	21NOV16	21NOV2016	04JAN17	04JAN2017	253	12	Entered	43	Male	12OCT16	253	Placebo	<250 mg/day	Yes	No	<250 mg/day	No	Yes	Yes	Yes	Yes
3	3	160	GYP	0	GYP	159	159	100	100	12_022	04JAN17	04JAN2017	28MAR17	28MAR2017	253	12	Entered	43	Male	12OCT16	253	Placebo	<250 mg/day	Yes	No	<250 mg/day	No	Yes	Yes	Yes	Yes
4	4	160	GYP	73	GYP	87	90	96.67	96.67	12_022	04JAN17	04JAN2017	28MAR17	28MAR2017	253	12	Entered	43	Male	12OCT16	253	Placebo	<250 mg/day	Yes	No	<250 mg/day	No	Yes	Yes	Yes	Yes
1	1	160	D-P	64	GYP	96	117	82.05	82.05	12_024	11OCT16	11OCT2016	18NOV16	18NOV2016	139	12	Early Termination	41	Female	11OCT16	139	MF4637	>=250 mg/day	Yes	No	>=250 mg/day	No	Yes	Yes	Yes	Yes
2	2	160	GYP	144	GYP	16	141	11.35	11.35	12_024	18NOV16	18NOV2016	05JAN17	05JAN2017	139	12	Early Termination	41	Female	11OCT16	139	MF4637	>=250 mg/day	Yes	No	>=250 mg/day	No	Yes	Yes	Yes	Yes
1	1	160	D-P	55	GYP	105	120	87.5	87.5	12_025	14OCT16	14OCT2016	22NOV16	22NOV2016	258	12	Entered	73	Male	14OCT16	258	MF4637	>=250 mg/day	Yes	No	>=250 mg/day	No	Yes	Yes	Yes	Yes
2	2	160	GYP	19	GYP	141	144	97.92	97.92	12_025	22NOV16	22NOV2016	10JAN17	10JAN2017	258	12	Entered	73	Male	14OCT16	258	MF4637	>=250 mg/day	Yes	No	>=250 mg/day	No	Yes	Yes	Yes	Yes
3	3	160	GYP	1	GYP	159	159	100	100	12_025	10JAN17	10JAN2017	29MAR17	29MAR2017	258	12	Entered	73	Male	14OCT16	258	MF4637	>=250 mg/day	Yes	No	>=250 mg/day	No	Yes	Yes	Yes	Yes
4	4	160	GYP	85	GYP	75	75	100	100	12_025	10JAN17	10JAN2017	29MAR17	29MAR2017	258	12	Entered	73	Male	14OCT16	258	MF4637	>=250 mg/day	Yes	No	>=250 mg/day	No	Yes	Yes	Yes	Yes
1	1	160	D-P	37	GYP	123	123	100	100	12_027	12OCT16	12OCT2016	21NOV16	21NOV2016	252	12	Entered	56	Female	12OCT16	252	Placebo	<250 mg/day	No	Yes	<250 mg/day	No	Yes	Yes	Yes	Yes
2	2	160	GYP	31	GYP	129	129	100	100	12_027	21NOV16	21NOV2016	04JAN17	04JAN2017	252	12	Entered	56	Female	12OCT16	252	Placebo	<250 mg/day	No	Yes	<250 mg/day	No	Yes	Yes	Yes	Yes
3	3	160	GYP	0	GYP	159	159	100	100	12_027	04JAN17	04JAN2017	30MAR17	30MAR2017	252	12	Entered	56	Female	12OCT16	252	Placebo	<250 mg/day	No	Yes	<250 mg/day	No	Yes	Yes	Yes	Yes
4	4	160	GYP	76	GYP	84	96	87.5	87.5	12_027	04JAN17	04JAN2017	30MAR17	30MAR2017	252	12	Entered	56	Female	12OCT16	252	Placebo	<250 mg/day	No	Yes	<250 mg/day	No	Yes	Yes	Yes	Yes
1	1	160	D-P	66	GYP	94	117	80.34	80.34	12_028	14OCT16	14OCT2016	21NOV16	21NOV2016	259	12	Entered	71	Female	14OCT16	259	Placebo	<250 mg/day	Yes	Yes	<250 mg/day	No	Yes	Yes	Yes	Yes
2	2	160	GYP	22	GYP	138	144	95.83	95.83	12_028	21NOV16	21NOV2016	09JAN17	09JAN2017	259	12	Entered	71	Female	14OCT16	259	Placebo	<250 mg/day	Yes	Yes	<250 mg/day	No	Yes	Yes	Yes	Yes
3	3	160	GYP	1	GYP	159	159	100	100	12_028	09JAN17	09JAN2017	30MAR17	30MAR2017	259	12	Entered	71	Female	14OCT16	259	Placebo	<250 mg/day	Yes	Yes	<250 mg/day	No	Yes	Yes	Yes	Yes
4	4	160	GYP	79	GYP	81	81	100	100	12_028	09JAN17	09JAN2017	30MAR17	30MAR2017	259	12	Entered	71	Female	14OCT16	259	Placebo	<250 mg/day	Yes	Yes	<250 mg/day	No	Yes	Yes	Yes	Yes
1	1	160	D-P	52	GYP	108	114	94.74	94.74	12_029	12OCT16	12OCT2016	18NOV16	18NOV2016	256	12	Entered	72	Male	12OCT16	256	Placebo	>=250 mg/day	Yes	Yes	>=250 mg/day	No	Yes	Yes	Yes	Yes
2	2	160	GYP	22	GYP	138	138	100	100	12_029	18NOV16	18NOV2016	04JAN17	04JAN2017	256	12	Entered	72	Male	12OCT16	256	Placebo	>=250 mg/day	Yes	Yes	>=250 mg/day	No	Yes	Yes	Yes	Yes
3	3	160	GYP	1	GYP	159	159	100	100	12_029	04JAN17	04JAN2017	28MAR17	28MAR2017	256	12	Entered	72	Male	12OCT16	256	Placebo	>=250 mg/day	Yes	Yes	>=250 mg/day	No	Yes	Yes	Yes	Yes
4	4	160	GYP	70	GYP	90	90	100	100	12_029	04JAN17	04JAN2017	28MAR17	28MAR2017	256	12	Entered	72	Male	12OCT16	256	Placebo	>=250 mg/day	Yes	Yes	>=250 mg/day	No	Yes	Yes	Yes	Yes
1	1	160	D-P	34	GYP	126	126	100	100	12_030	12OCT16	12OCT2016	22NOV16	22NOV2016	255	12	Entered	56	Male	12OCT16	255	MF4637	<250 mg/day	Yes	Yes	<250 mg/day	No	Yes	Yes	Yes	Yes
2	2	160	GYP	34	GYP	126	132	95.45	95.45	12_030	22NOV16	22NOV2016	06JAN17	06JAN2017	255	12	Entered	56	Male	12OCT16	255	MF4637	<250 mg/day	Yes	Yes	<250 mg/day	No	Yes	Yes	Yes	Yes
3	3	160	GYP	1	GYP	159	159	100	100	12_030	06JAN17	06JAN2017	29MAR17	29MAR2017	255	12	Entered	56	Male	12OCT16	255	MF4637	<250 mg/day	Yes	Yes	<250 mg/day	No	Yes	Yes	Yes	Yes
4	4	160	GYP	98	GYP	62	87	71.26	71.26	12_030	06JAN17	06JAN2017	29MAR17	29MAR2017	255	12	Entered	56	Male	12OCT16	255	MF4637	<250 mg/day	Yes	Yes	<250 mg/day	No	Yes	Yes	Yes	Yes
1	1	160	D-P	31	GYP	129	129	100	100	12_032	02NOV16	02NOV2016	14DEC16	14DEC2016	280	12	Entered	67	Male	02NOV16	280	Placebo	>=250 mg/day	Yes	No	>=250 mg/day	No	Yes	Yes	Yes	Yes
2	2	160	GYP	6	GYP	154	159	96.86	96.86	12_032	14DEC16	14DEC2016	06FEB17	06FEB2017	280	12	Entered	67	Male	02NOV16	280	Placebo	>=250 mg/day	Yes	No	>=250 mg/day	No	Yes	Yes	Yes	Yes
3	3	160	GYP	1	GYP	159	159	100	100	12_032	06FEB17	06FEB2017	18APR17	18APR2017	280	12	Entered	67	Male	02NOV16	280	Placebo	>=250 mg/day	Yes	No	>=250 mg/day	No	Yes	Yes	Yes	Yes
4	4	160	GYP	106	GYP	54	54	100	100	12_032	06FEB17	06FEB2017	18APR17	18APR2017	280	12	Entered	67	Male	02NOV16	280	Placebo	>=250 mg/day	Yes	No	>=250 mg/day	No	Yes	Yes	Yes	Yes
1	1	160	D-P	34	GYP	126	126	100	100	12_033	02NOV16	02NOV2016	14DEC16	14DEC2016	282	12	Entered	72	Female	02NOV16	282	MF4637	>=250 mg/day	Yes	No	>=250 mg/day	No	Yes	Yes	Yes	Yes
2	2	160	GYP	34	GYP	126	126	100	100	12_033	14DEC16	14DEC2016	25JAN17	25JAN2017	282	12	Entered	72	Female	02NOV16	282	MF4637	>=250 mg/day	Yes	No	>=250 mg/day	No	Yes	Yes	Yes	Yes
3	3	160	GYP	1	GYP	159	159	100	100	12_033	25JAN17	25JAN2017	18APR17	18APR2017	282	12	Entered	72	Female	02NOV16	282	MF4637	>=250 mg/day	Yes	No	>=250 mg/day	No	Yes	Yes	Yes	Yes
4	4	160	GYP	75	GYP	85	90	94.44	94.44	12_033	25JAN17	25JAN2017	18APR17	18APR2017	282	12	Entered	72	Female	02NOV16	282	MF4637	>=250 mg/day	Yes	No	>=250 mg/day	No	Yes	Yes	Yes	Yes
1	1	160	D-P	49	GYP	111	132	84.09	84.09	12_034	26OCT16	26OCT2016	08DEC16	08DEC2016	261	12	Entered	55	Female	26OCT16	261	Placebo	>=250 mg/day	Yes	No	>=250 mg/day	No	Yes	Yes	Yes	No
2	2	160	GYP	48	GYP	112	123	91.06	91.06	12_034	08DEC16	08DEC2016	19JAN17	19JAN2017	261	12	Entered	55	Female	26OCT16	261	Placebo	>=250 mg/day	Yes	No	>=250 mg/day	No	Yes	Yes	Yes	No
3	3	160	GYP	1	I-D	159	159	100	100	12_034	19JAN17	19JAN2017	27APR17	27APR2017	261	12	Entered	55	Female	26OCT16	261	Placebo	>=250 mg/day	Yes	No	>=250 mg/day	No	Yes	Yes	Yes	No
4	4	160	GYP	39	I-D	121	135	89.63	89.63	12_034	19JAN17	19JAN2017	27APR17	27APR2017	261	12	Entered	55	Female	26OCT16	261	Placebo	>=250 mg/day	Yes	No	>=250 mg/day	No	Yes	Yes	Yes	No
1	1	160	D-P	58	GYP	102	126	80.95	80.95	12_038	26OCT16	26OCT2016	06DEC16	06DEC2016	263	12	Entered	62	Male	26OCT16	263	Placebo	>=250 mg/day	Yes	Yes	>=250 mg/day	No	Yes	Yes	Yes	Yes
2	2	160	GYP	34	GYP	126	132	95.45	95.45	12_038	06DEC16	06DEC2016	20JAN17	20JAN2017	263	12	Entered	62	Male	26OCT16	263	Placebo	>=250 mg/day	Yes	Yes	>=250 mg/day	No	Yes	Yes	Yes	Yes
3	3	160	GYP	1	GYP	159	159	100	100	12_038	20JAN17	20JAN2017	13APR17	13APR2017	263	12	Entered	62	Male	26OCT16	263	Placebo	>=250 mg/day	Yes	Yes	>=250 mg/day	No	Yes	Yes	Yes	Yes
4	4	160	GYP	76	GYP	84	90	93.33	93.33	12_038	20JAN17	20JAN2017	13APR17	13APR2017	263	12	Entered	62	Male	26OCT16	263	Placebo	>=250 mg/day	Yes	Yes	>=250 mg/day	No	Yes	Yes	Yes	Yes
1	1	160	D-P	46	GYP	114	129	88.37	88.37	12_039	26OCT16	26OCT2016	07DEC16	07DEC2016	262	12	Entered	57	Male	26OCT16	262	MF4637	<250 mg/day	No	No	<250 mg/day	No	Yes	Yes	Yes	Yes
2	2	160	GYP	59	GYP	101	120	84.17	84.17	12_039	07DEC16	07DEC2016	17JAN17	17JAN2017	262	12	Entered	57	Male	26OCT16	262	MF4637	<250 mg/day	No	No	<250 mg/day	No	Yes	Yes	Yes	Yes
3	3	160	GYP	1	GYP	159	159	100	100	12_039	17JAN17	17JAN2017	13APR17	13APR2017	262	12	Entered	57	Male	26OCT16	262	MF4637	<250 mg/day	No	No	<250 mg/day	No	Yes	Yes	Yes	Yes
4	4	160	GYP	61	GYP	99	99	100	100	12_039	17JAN17	17JAN2017	13APR17	13APR2017	262	12	Entered	57	Male	26OCT16	262	MF4637	<250 mg/day	No	No	<250 mg/day	No	Yes	Yes	Yes	Yes
1	1	160	D-P	36	GYP	124	126	98.41	98.41	12_040	10NOV16	10NOV2016	22DEC16	22DEC2016	292	12	Entered	60	Female	10NOV16	292	MF4637	>=250 mg/day	Yes	Yes	>=250 mg/day	No	Yes	Yes	Yes	Yes
2	2	160	GYP	39	GYP	121	126	96.03	96.03	12_040	22DEC16	22DEC2016	02FEB17	02FEB2017	292	12	Entered	60	Female	10NOV16	292	MF4637	>=250 mg/day	Yes	Yes	>=250 mg/day	No	Yes	Yes	Yes	Yes
3	3	160	GYP	1	I-D	159	159	100	100	12_040	02FEB17	02FEB2017	04MAY17	04MAY2017	292	12	Entered	60	Female	10NOV16	292	MF4637	>=250 mg/day	Yes	Yes	>=250 mg/day	No	Yes	Yes	Yes	Yes
4	4	160	GYP	52	I-D	108	114	94.74	94.74	12_040	02FEB17	02FEB2017	04MAY17	04MAY2017	292	12	Entered	60	Female	10NOV16	292	MF4637	>=250 mg/day	Yes	Yes	>=250 mg/day	No	Yes	Yes	Yes	Yes
1	1	160	D-P	109	GYP	51	57	89.47	89.47	12_041	10NOV16	10NOV2016	06DEC16	06DEC2016	293	12	Early Termination	54	Female	10NOV16	293	Placebo	>=250 mg/day	Yes	Yes	>=250 mg/day	No	Yes	Yes	Yes	Yes
1	1	160	D-P	42	GYP	118	129	91.47	91.47	12_043	03NOV16	03NOV2016	15DEC16	15DEC2016	283	12	Entered	77	Male	03NOV16	283	MF4637	>=250 mg/day	Yes	Yes	>=250 mg/day	No	Yes	Yes	Yes	Yes
2	2	160	GYP	37	GYP	123	123	100	100	12_043	15DEC16	15DEC2016	26JAN17	26JAN2017	283	12	Entered	77	Male	03NOV16	283	MF4637	>=250 mg/day	Yes	Yes	>=250 mg/day	No	Yes	Yes	Yes	Yes
3	3	160	GYP	1	GYP	159	159	100	100	12_043	26JAN17	26JAN2017	20APR17	20APR2017	283	12	Entered	77	Male	03NOV16	283	MF4637	>=250 mg/day	Yes	Yes	>=250 mg/day	No	Yes	Yes	Yes	Yes
4	4	160	GYP	67	GYP	93	93	100	100	12_043	26JAN17	26JAN2017	20APR17	20APR2017	283	12	Entered	77	Male	03NOV16	283	MF4637	>=250 mg/day	Yes	Yes	>=250 mg/day	No	Yes	Yes	Yes	Yes
1	1	160	D-P	34	GYP	126	126	100	100	12_044	02NOV16	02NOV2016	14DEC16	14DEC2016	281	12	Entered	66	Male	02NOV16	281	Placebo	>=250 mg/day	Yes	Yes	>=250 mg/day	No	Yes	Yes	Yes	Yes
2	2	160	GYP	28	GYP	132	132	100	100	12_044	07DEC16	07DEC2016	27JAN17	27JAN2017	281	12	Entered	66	Male	02NOV16	281	Placebo	>=250 mg/day	Yes	Yes	>=250 mg/day	No	Yes	Yes	Yes	Yes
3	3	160	GYP	1	GYP	159	159	100	100	12_044	27JAN17	27JAN2017	18APR17	18APR2017	281	12	Entered	66	Male	02NOV16	281	Placebo	>=250 mg/day	Yes	Yes	>=250 mg/day	No	Yes	Yes	Yes	Yes
4	4	160	GYP	79	GYP	81	84	96.43	96.43	12_044	27JAN17	27JAN2017	18APR17	18APR2017	281	12	Entered	66	Male	02NOV16	281	Placebo	>=250 mg/day	Yes	Yes	>=250 mg/day	No	Yes	Yes	Yes	Yes
1	1	160	D-P	44	GYP	116	126	92.06	92.06	12_046	03NOV16	03NOV2016	15DEC16	15DEC2016	284	12	Entered	75	Male	03NOV16	284	MF4637	>=250 mg/day	Yes	Yes	>=250 mg/day	No	Yes	Yes	Yes	Yes
2	2	160	GYP	40	GYP	120	126	95.24	95.24	12_046	15DEC16	15DEC2016	26JAN17	26JAN2017	284	12	Entered	75	Male	03NOV16	284	MF4637	>=250 mg/day	Yes	Yes	>=250 mg/day	No	Yes	Yes	Yes	Yes
3	3	160	GYP	0	GYP	159	159	100	100	12_046	26JAN17	26JAN2017	20APR17	20APR2017	284	12	Entered	75	Male	03NOV16	284	MF4637	>=250 mg/day	Yes	Yes	>=250 mg/day	No	Yes	Yes	Yes	Yes
4	4	160	GYP	73	GYP	87	93	93.55	93.55	12_046	26JAN17	26JAN2017	20APR17	20APR2017	284	12	Entered	75	Male	03NOV16	284	MF4637	>=250 mg/day	Yes	Yes	>=250 mg/day	No	Yes	Yes	Yes	Yes
1	1	160	D-P	32	GYP	128	129	99.22	99.22	12_048	03NOV16	03NOV2016	15DEC16	15DEC2016	285	12	Entered	63	Female	03NOV16	285	MF4637	<250 mg/day	Yes	No	<250 mg/day	No	Yes	Yes	Yes	Yes
2	2	160	GYP	45	GYP	115	123	93.5	93.5	12_048	15DEC16	15DEC2016	26JAN17	26JAN2017	285	12	Entered	63	Female	03NOV16	285	MF4637	<250 mg/day	Yes	No	<250 mg/day	No	Yes	Yes	Yes	Yes
3	3	160	GYP	1	GYP	159	159	100	100	12_048	26JAN17	26JAN2017	18APR17	18APR2017	285	12	Entered	63	Female	03NOV16	285	MF4637	<250 mg/day	Yes	No	<250 mg/day	No	Yes	Yes	Yes	Yes
4	4	160	GYP	76	GYP	84	87	96.55	96.55	12_048	26JAN17	26JAN2017	18APR17	18APR2017	285	12	Entered	63	Female	03NOV16	285	MF4637	<250 mg/day	Yes	No	<250 mg/day	No	Yes	Yes	Yes	Yes
1	1	160	D-P	55	GYP	105	126	83.33	83.33	12_054	03NOV16	03NOV2016	14DEC16	14DEC2016	286	12	Entered	60	Female	03NOV16	286	Placebo	>=250 mg/day	Yes	Yes	>=250 mg/day	No	Yes	Yes	Yes	Yes
2	2	160	GYP	32	GYP	128	129	99.22	99.22	12_054	14DEC16	14DEC2016	27JAN17	27JAN2017	286	12	Entered	60	Female	03NOV16	286	Placebo	>=250 mg/day	Yes	Yes	>=250 mg/day	No	Yes	Yes	Yes	Yes
3	3	160	GYP	0	GYP	159	159	100	100	12_054	27JAN17	27JAN2017	20APR17	20APR2017	286	12	Entered	60	Female	03NOV16	286	Placebo	>=250 mg/day	Yes	Yes	>=250 mg/day	No	Yes	Yes	Yes	Yes
4	4	160	GYP	72	GYP	88	90	97.78	97.78	12_054	27JAN17	27JAN2017	20APR17	20APR2017	286	12	Entered	60	Female	03NOV16	286	Placebo	>=250 mg/day	Yes	Yes	>=250 mg/day	No	Yes	Yes	Yes	Yes
1	1	160	D-P	0	GYP	160	210	76.19	76.19	12_056	03NOV16	03NOV2016	11JAN17	11JAN2017	287	12	Early Termination	61	Male	03NOV16	287	Placebo	<250 mg/day	Yes	Yes	<250 mg/day	No	Yes	Yes	Yes	Yes
1	1	160	D-P	40	GYP	120	126	95.24	95.24	12_057	10NOV16	10NOV2016	22DEC16	22DEC2016	294	12	Entered	65	Female	10NOV16	294	Placebo	<250 mg/day	Yes	No	<250 mg/day	No	Yes	Yes	Yes	Yes
2	2	160	GYP	22	GYP	138	138	100	100	12_057	22DEC16	22DEC2016	06FEB17	06FEB2017	294	12	Entered	65	Female	10NOV16	294	Placebo	<250 mg/day	Yes	No	<250 mg/day	No	Yes	Yes	Yes	Yes
3	3	160	GYP	1	I-D	159	159	100	100	12_057	06FEB17	06FEB2017	27APR17	27APR2017	294	12	Entered	65	Female	10NOV16	294	Placebo	<250 mg/day	Yes	No	<250 mg/day	No	Yes	Yes	Yes	Yes
4	4	160	GYP	79	I-D	81	81	100	100	12_057	06FEB17	06FEB2017	27APR17	27APR2017	294	12	Entered	65	Female	10NOV16	294	Placebo	<250 mg/day	Yes	No	<250 mg/day	No	Yes	Yes	Yes	Yes
1	1	160	GYP	31	GYP	129	129	100	100	12_058	16NOV16	16NOV2016	28DEC16	28DEC2016	181	12	Entered	68	Male	16NOV16	181	Placebo	<250 mg/day	Yes	Yes	<250 mg/day	No	Yes	Yes	Yes	Yes
2	2	160	GYP	31	GYP	129	129	100	100	12_058	28DEC16	28DEC2016	10FEB17	10FEB2017	181	12	Entered	68	Male	16NOV16	181	Placebo	<250 mg/day	Yes	Yes	<250 mg/day	No	Yes	Yes	Yes	Yes
3	3	160	GYP	1	I-D	159	159	100	100	12_058	10FEB17	10FEB2017	03MAY17	03MAY2017	181	12	Entered	68	Male	16NOV16	181	Placebo	<250 mg/day	Yes	Yes	<250 mg/day	No	Yes	Yes	Yes	Yes
4	4	160	GYP	76	I-D	84	87	96.55	96.55	12_058	10FEB17	10FEB2017	03MAY17	03MAY2017	181	12	Entered	68	Male	16NOV16	181	Placebo	<250 mg/day	Yes	Yes	<250 mg/day	No	Yes	Yes	Yes	Yes
1	1	160	GYP	5	GYP	155	156	99.36	99.36	12_062	16NOV16	16NOV2016	06JAN17	06JAN2017	295	12	Entered	53	Male	16NOV16	295	MF4637	<250 mg/day	Yes	No	<250 mg/day	No	Yes	Yes	Yes	Yes
2	2	160	GYP	67	GYP	93	93	100	100	12_062	06JAN17	06JAN2017	07FEB17	07FEB2017	295	12	Entered	53	Male	16NOV16	295	MF4637	<250 mg/day	Yes	No	<250 mg/day	No	Yes	Yes	Yes	Yes
3	3	160	GYP	0	I-D	159	159	100	100	12_062	07FEB17	07FEB2017	03MAY17	03MAY2017	295	12	Entered	53	Male	16NOV16	295	MF4637	<250 mg/day	Yes	No	<250 mg/day	No	Yes	Yes	Yes	Yes
4	4	160	GYP	71	I-D	249	255	97.65	97.65	12_062	07FEB17	07FEB2017	03MAY17	03MAY2017	295	12	Entered	53	Male	16NOV16	295	MF4637	<250 mg/day	Yes	No	<250 mg/day	No	Yes	Yes	Yes	Yes
1	1	160	GYP	31	GYP	129	129	100	100	12_065	16NOV16	16NOV2016	28DEC16	28DEC2016	182	12	Entered	76	Female	16NOV16	182	MF4637	<250 mg/day	Yes	Yes	<250 mg/day	No	Yes	Yes	Yes	Yes
2	2	160	GYP	43	GYP	117	123	95.12	95.12	12_065	28DEC16	28DEC2016	08FEB17	08FEB2017	182	12	Entered	76	Female	16NOV16	182	MF4637	<250 mg/day	Yes	Yes	<250 mg/day	No	Yes	Yes	Yes	Yes
3	3	160	GYP	1	I-D	159	159	100	100	12_065	08FEB17	08FEB2017	10MAY17	10MAY2017	182	12	Entered	76	Female	16NOV16	182	MF4637	<250 mg/day	Yes	Yes	<250 mg/day	No	Yes	Yes	Yes	Yes
4	4	160	GYP	52	I-D	108	114	94.74	94.74	12_065	08FEB17	08FEB2017	10MAY17	10MAY2017	182	12	Entered	76	Female	16NOV16	182	MF4637	<250 mg/day	Yes	Yes	<250 mg/day	No	Yes	Yes	Yes	Yes
1	1	160	GYP	34	GYP	126	126	100	100	12_067	16NOV16	16NOV2016	27DEC16	27DEC2016	180	12	Entered	72	Female	16NOV16	180	MF4637	>=250 mg/day	Yes	Yes	>=250 mg/day	No	Yes	Yes	Yes	Yes
2	2	160	GYP	40	GYP	120	123	97.56	97.56	12_067	27DEC16	27DEC2016	07FEB17	07FEB2017	180	12	Entered	72	Female	16NOV16	180	MF4637	>=250 mg/day	Yes	Yes	>=250 mg/day	No	Yes	Yes	Yes	Yes
3	3	160	GYP	1	I-D	159	159	100	100	12_067	07FEB17	07FEB2017	04MAY17	04MAY2017	180	12	Entered	72	Female	16NOV16	180	MF4637	>=250 mg/day	Yes	Yes	>=250 mg/day	No	Yes	Yes	Yes	Yes
4	4	160	GYP	70	I-D	90	99	90.91	90.91	12_067	07FEB17	07FEB2017	04MAY17	04MAY2017	180	12	Entered	72	Female	16NOV16	180	MF4637	>=250 mg/day	Yes	Yes	>=250 mg/day	No	Yes	Yes	Yes	Yes
1	1	160	GYP	44	GYP	116	132	87.88	87.88	12_068	21NOV16	21NOV2016	03JAN17	03JAN2017	183	12	Entered	78	Female	21NOV16	183	Placebo	>=250 mg/day	Yes	Yes	>=250 mg/day	No	Yes	Yes	Yes	Yes
2	2	160	GYP	40	GYP	120	120	100	100	12_068	03JAN17	03JAN2017	13FEB17	13FEB2017	183	12	Entered	78	Female	21NOV16	183	Placebo	>=250 mg/day	Yes	Yes	>=250 mg/day	No	Yes	Yes	Yes	Yes
3	3	160	GYP	1	I-D	159	159	100	100	12_068	13FEB17	13FEB2017	04MAY17	04MAY2017	183	12	Entered	78	Female	21NOV16	183	Placebo	>=250 mg/day	Yes	Yes	>=250 mg/day	No	Yes	Yes	Yes	Yes
4	4	160	GYP	91	I-D	69	81	85.19	85.19	12_068	13FEB17	13FEB2017	04MAY17	04MAY2017	183	12	Entered	78	Female	21NOV16	183	Placebo	>=250 mg/day	Yes	Yes	>=250 mg/day	No	Yes	Yes	Yes	Yes
1	1	160	ALL	0	ALL	126	126	100	100	13_001	27OCT16	27OCT2016	08DEC16	08DEC2016	162	13	Entered	42	Female	28OCT16	162	Placebo	<250 mg/day	No	No	>=250 mg/day	No	Yes	Yes	Yes	Yes
2	2	160	ALL	34	ALL	126	126	100	100	13_001	08DEC16	08DEC2016	19JAN17	19JAN2017	162	13	Entered	42	Female	28OCT16	162	Placebo	<250 mg/day	No	No	>=250 mg/day	No	Yes	Yes	Yes	Yes
3	34	320	ALL	50	ALL	270	270	100	100	13_001	19JAN17	19JAN2017	19APR17	19APR2017	162	13	Entered	42	Female	28OCT16	162	Placebo	<250 mg/day	No	No	>=250 mg/day	No	Yes	Yes	Yes	Yes
1	1	160	AMP	34	ALL	126	129	97.67	97.67	13_002	19OCT16	19OCT2016	30NOV16	30NOV2016	204	13	Entered	67	Female	20OCT16	204	MF4637	<250 mg/day	Yes	Yes	<250 mg/day	No	Yes	Yes	Yes	Yes
2	2	160	ALL	34	ALL	126	126	100	100	13_002	30NOV16	30NOV2016	11JAN17	11JAN2017	204	13	Entered	67	Female	20OCT16	204	MF4637	<250 mg/day	Yes	Yes	<250 mg/day	No	Yes	Yes	Yes	Yes
3	34	320	ALL	65	ALL	255	249	102.4	102.41	13_002	11JAN17	11JAN2017	05APR17	05APR2017	204	13	Entered	67	Female	20OCT16	204	MF4637	<250 mg/day	Yes	Yes	<250 mg/day	No	Yes	Yes	Yes	Yes
1	1	160	AMP	34	ALL	126	126	100	100	13_003	19OCT16	19OCT2016	30NOV16	30NOV2016	205	13	Entered	65	Female	20OCT16	205	Placebo	<250 mg/day	Yes	Yes	<250 mg/day	No	Yes	Yes	Yes	Yes
2	2	160	ALL	34	ALL	126	126	100	100	13_003	30NOV16	30NOV2016	11JAN17	11JAN2017	205	13	Entered	65	Female	20OCT16	205	Placebo	<250 mg/day	Yes	Yes	<250 mg/day	No	Yes	Yes	Yes	Yes
3	34	320	ALL	68	ALL	252	252	100	100	13_003	11JAN17	11JAN2017	05APR17	05APR2017	205	13	Entered	65	Female	20OCT16	205	Placebo	<250 mg/day	Yes	Yes	<250 mg/day	No	Yes	Yes	Yes	Yes
1	1	160	AMP	30	ALL	126	129	97.67	97.67	13_004	19OCT16	19OCT2016	01DEC16	01DEC2016	206	13	Entered	69	Female	20OCT16	206	MF4637	<250 mg/day	No	Yes	<250 mg/day	No	Yes	Yes	Yes	Yes
2	2	160	ALL	37	ALL	123	123	100	100	13_004	01DEC16	01DEC2016	11JAN17	11JAN2017	206	13	Entered	69	Female	20OCT16	206	MF4637	<250 mg/day	No	Yes	<250 mg/day	No	Yes	Yes	Yes	Yes
3	3	320	ALL	74	ALL	246	252	97.62	97.62	13_004	11JAN17	11JAN2017	05APR17	05APR2017	206	13	Entered	69	Female	20OCT16	206	MF4637	<250 mg/day	No	Yes	<250 mg/day	No	Yes	Yes	Yes	Yes
1	1	160	ALL	34	ALL	126	126	100	100	13_005	09NOV16	09NOV2016	21DEC16	21DEC2016	276	13	Entered	48	Male	10NOV16	276	MF4637	<250 mg/day	No	No	<250 mg/day	No	Yes	Yes	Yes	Yes
2	2	160	ALL	34	ALL	126	126	100	100	13_005	21DEC16	21DEC2016	01FEB17	01FEB2017	276	13	Entered	48	Male	10NOV16	276	MF4637	<250 mg/day	No	No	<250 mg/day	No	Yes	Yes	Yes	Yes
3	34	320	ALL	74	ALL	246	252	97.62	97.62	13_005	01FEB17	01FEB2017	26APR17	26APR2017	276	13	Entered	48	Male	10NOV16	276	MF4637	<250 mg/day	No	No	<250 mg/day	No	Yes	Yes	Yes	Yes
1	1	160	ALL	34	G-S	126	126	100	100	13_006	28OCT16	28OCT2016	09DEC16	09DEC2016	160	13	Entered	40	Male	28OCT16	160	MF4637	<250 mg/day	No	No	<250 mg/day	No	Yes	Yes	Yes	Yes
2	2	160	ALL	34	ALL	126	126	100	100	13_006	09DEC16	09DEC2016	20JAN17	20JAN2017	160	13	Entered	40	Male	28OCT16	160	MF4637	<250 mg/day	No	No	<250 mg/day	No	Yes	Yes	Yes	Yes
3	34	320	ALL	80	ALL	240	246	97.56	97.56	13_006	20JAN17	20JAN2017	12APR17	12APR2017	160	13	Entered	40	Male	28OCT16	160	MF4637	<250 mg/day	No	No	<250 mg/day	No	Yes	Yes	Yes	Yes
1	1	160	ALL	0	ALL	138	138	100	100	13_009	04NOV16	04NOV2016	20DEC16	20DEC2016	267	13	Entered	51	Male	05NOV16	267	Placebo	<250 mg/day	No	Yes	>=250 mg/day	No	Yes	Yes	Yes	Yes
2	2	160	ALL	55	ALL	105	105	100	100	13_009	20DEC16	20DEC2016	24JAN17	24JAN2017	267	13	Entered	51	Male	05NOV16	267	Placebo	<250 mg/day	No	Yes	>=250 mg/day	No	Yes	Yes	Yes	Yes
3	34	320	ALL	65	ALL	255	255	100	100	13_009	24JAN17	24JAN2017	19APR17	19APR2017	267	13	Entered	51	Male	05NOV16	267	Placebo	<250 mg/day	No	Yes	>=250 mg/day	No	Yes	Yes	Yes	Yes
1	1	160	ALL	34	ALL	126	126	100	100	13_011	20OCT16	20OCT2016	09DEC16	09DEC2016	207	13	Entered	43	Male	28OCT16	207	Placebo	<250 mg/day	No	No	<250 mg/day	No	Yes	Yes	Yes	Yes
2	2	160	ALL	34	ALL	126	126	100	100	13_011	09DEC16	09DEC2016	20JAN17	20JAN2017	207	13	Entered	43	Male	28OCT16	207	Placebo	<250 mg/day	No	No	<250 mg/day	No	Yes	Yes	Yes	Yes
3	34	320	ALL	74	ALL	246	246	100	100	13_011	20JAN17	20JAN2017	12APR17	12APR2017	207	13	Entered	43	Male	28OCT16	207	Placebo	<250 mg/day	No	No	<250 mg/day	No	Yes	Yes	Yes	Yes
1	1	160	ALL	22	ALL	138	138	100	100	13_013	28OCT16	28OCT2016	13DEC16	13DEC2016	161	13	Entered	46	Male	28OCT16	161	MF4637	<250 mg/day	No	No	>=250 mg/day	No	Yes	Yes	Yes	Yes
2	2	160	ALL	43	ALL	117	117	100	100	13_013	13DEC16	13DEC2016	20JAN17	20JAN2017	161	13	Entered	46	Male	28OCT16	161	MF4637	<250 mg/day	No	No	>=250 mg/day	No	Yes	Yes	Yes	Yes
3	34	320	ALL	50	ALL	270	270	100	100	13_013	20JAN17	20JAN2017	05MAY17	05MAY2017	161	13	Entered	46	Male	28OCT16	161	MF4637	<250 mg/day	No	No	>=250 mg/day	No	Yes	Yes	Yes	Yes
1	1	160	ALL	31	ALL	129	129	100	100	13_014	03NOV16	03NOV2016	15DEC16	15DEC2016	266	13	Entered	71	Female	03NOV16	266	Placebo	<250 mg/day	No	Yes	<250 mg/day	No	Yes	Yes	Yes	Yes
2	2	160	ALL	37	ALL	123	123	100	100	13_014	15DEC16	15DEC2016	25JAN17	25JAN2017	266	13	Entered	71	Female	03NOV16	266	Placebo	<250 mg/day	No	Yes	<250 mg/day	No	Yes	Yes	Yes	Yes
3	34	320	ALL	252	ALL	256	252	101.58	101.59	13_014	25JAN17	25JAN2017	20APR17	20APR2017	266	13	Entered	71	Female	03NOV16	266	Placebo	<250 mg/day	No	Yes	<250 mg/day	No	Yes	Yes	Yes	Yes
1	1	160	ALL	34	ALL	126	126	100	100	13_015	03NOV16	03NOV2016	15DEC16	15DEC2016	264	13	Entered	75	Male	03NOV16	264	MF4637	<250 mg/day	No	Yes	<250 mg/day	No	Yes	Yes	Yes	Yes
2	2	160	ALL	34	ALL	126	126	100	100	13_015	15DEC16	15DEC2016	25JAN17	25JAN2017	264	13	Entered	75	Male	03NOV16	264	MF4637	<250 mg/day	No	Yes	<250 mg/day	No	Yes	Yes	Yes	Yes
3	34	320	ALL	68	ALL	252	252	100	100	13_015	25JAN17	25JAN2017	20APR17	20APR2017	264	13	Entered	75	Male	03NOV16	264	MF4637	<250 mg/day	No	Yes	<250 mg/day	No	Yes	Yes	Yes	Yes
1	1	160	ALL	34	ALL	126	126	100	100	13_016	27OCT16	27OCT2016	08DEC16	08DEC2016	163	13	Entered	70	Female	28OCT16	163	Placebo	<250 mg/day	No	Yes	>=250 mg/day	No	Yes	Yes	Yes	Yes
2	2	160	ALL	34	ALL	126	126	100	100	13_016	08DEC16	08DEC2016	19JAN17	19JAN2017	163	13	Entered	70	Female	28OCT16	163	Placebo	<250 mg/day	No	Yes	>=250 mg/day	No	Yes	Yes	Yes	Yes
3	34	320	ALL	60	ALL	260	252	103.17	103.17	13_016	19JAN17	19JAN2017	13APR17	13APR2017	163	13	Entered	70	Female	28OCT16	163	Placebo	<250 mg/day	No	Yes	>=250 mg/day	No	Yes	Yes	Yes	Yes
1	1	160	ALL	34	ALL	126	126	100	100	13_017	03NOV16	03NOV2016	15DEC16	15DEC2016	265	13	Entered	52	Female	03NOV16	265	MF4637	<250 mg/day	Yes	Yes	>=250 mg/day	No	Yes	Yes	Yes	Yes
2	2	160	ALL	37	ALL	123	123	100	100	13_017	15DEC16	15DEC2016	24JAN17	24JAN2017	265	13	Entered	52	Female	03NOV16	265	MF4637	<250 mg/day	Yes	Yes	>=250 mg/day	No	Yes	Yes	Yes	Yes
3	34	320	ALL	66	ALL	254	249	102	102.01	13_017	24JAN17	24JAN2017	19APR17	19APR2017	265	13	Entered	52	Female	03NOV16	265	MF4637	<250 mg/day	Yes	Yes	>=250 mg/day	No	Yes	Yes	Yes	Yes
1	1	160	ALL	43	ALL	117	117	100	100	13_019	22NOV16	22NOV2016	30DEC16	30DEC2016	278	13	Entered	47	Female	23NOV16	278	Placebo	<250 mg/day	No	No	<250 mg/day	No	Yes	Yes	Yes	Yes
2	2	160	ALL	34	ALL	126	126	100	100	13_019	30DEC16	30DEC2016	10FEB17	10FEB2017	278	13	Entered	47	Female	23NOV16	278	Placebo	<250 mg/day	No	No	<250 mg/day	No	Yes	Yes	Yes	Yes
3	34	320	ALL	38	ALL	282	282	100	100	13_019	10FEB17	10FEB2017	15MAY17	15MAY2017	278	13	Entered	47	Female	23NOV16	278	Placebo	<250 mg/day	No	No	<250 mg/day	No	Yes	Yes	Yes	Yes
1	1	160	ALL	37	ALL	123	123	100	100	13_020	17NOV16	17NOV2016	28DEC16	28DEC2016	277	13	Entered	55	Male	17NOV16	277	Placebo	<250 mg/day	No	No	<250 mg/day	No	Yes	Yes	Yes	Yes
2	2	160	ALL	34	ALL	126	126	100	100	13_020	28DEC16	28DEC2016	10FEB17	10FEB2017	277	13	Entered	55	Male	17NOV16	277	Placebo	<250 mg/day	No	No	<250 mg/day	No	Yes	Yes	Yes	Yes
3	34	320	ALL	59	ALL	261	261	100	100	13_020	10FEB17	10FEB2017	08MAY17	08MAY2017	277	13	Entered	55	Male	17NOV16	277	Placebo	<250 mg/day	No	No	<250 mg/day	No	Yes	Yes	Yes	Yes
1	1	160	IMTM	21	IMTM	139	129	107.75	107.75	14_001	25OCT16	25OCT2016	06DEC16	06DEC2016	185	14	Entered	61	Male	25OCT16	185	Placebo	>=250 mg/day	No	Yes	>=250 mg/day	No	Yes	Yes	Yes	Yes
2	2	160	IMTM	37	IMTM	123	123	100	100	14_001	06DEC16	06DEC2016	17JAN17	17JAN2017	185	14	Entered	61	Male	25OCT16	185	Placebo	>=250 mg/day	No	Yes	>=250 mg/day	No	Yes	Yes	Yes	Yes
3	3	160	IMTM	34	IMTM	126	126	100	100	14_001	17JAN17	17JAN2017	11APR17	11APR2017	185	14	Entered	61	Male	25OCT16	185	Placebo	>=250 mg/day	No	Yes	>=250 mg/day	No	Yes	Yes	Yes	Yes
4	4	160	IMTM	26	IMTM	134	129	103.88	103.88	14_001	17JAN17	17JAN2017	11APR17	11APR2017	185	14	Entered	61	Male	25OCT16	185	Placebo	>=250 mg/day	No	Yes	>=250 mg/day	No	Yes	Yes	Yes	Yes
1	1	160	IMTM	31	IMTM	126	126	100	100	14_002	12OCT16	12OCT2016	23NOV16	23NOV2016	208	14	Entered	44	Female	12OCT16	208	MF4637	<250 mg/day	No	Yes	>=250 mg/day	No	Yes	Yes	Yes	Yes
2	2	160	IMTM	40	IMTM	120	120	100	100	14_002	23NOV16	23NOV2016	03JAN17	03JAN2017	208	14	Entered	44	Female	12OCT16	208	MF4637	<250 mg/day	No	Yes	>=250 mg/day	No	Yes	Yes	Yes	Yes
3	3	160	IMTM	34	IMTM	126	126	100	100	14_002	03JAN17	03JAN2017	24MAR17	24MAR2017	208	14	Entered	44	Female	12OCT16	208	MF4637	<250 mg/day	No	Yes	>=250 mg/day	No	Yes	Yes	Yes	Yes
4	4	160	IMTM	46	IMTM	114	114	100	100	14_002	03JAN17	03JAN2017	24MAR17	24MAR2017	208	14	Entered	44	Female	12OCT16	208	MF4637	<250 mg/day	No	Yes	>=250 mg/day	No	Yes	Yes	Yes	Yes
1	1	160	IMTM							14_010	03NOV16	03NOV2016			184	14	Early Termination	61	Female		184	MF4637	<250 mg/day	No	No	>=250 mg/day	No	No	Yes	No	No
1	1	160	IMTM	28	IMTM	132	135	97.78	97.78	14_012	14NOV16	14NOV2016	29DEC16	29DEC2016	186	14	Early Termination	34	Male	15NOV16	186	Placebo	<250 mg/day	No	No	>=250 mg/day	No	Yes	Yes	Yes	Yes
2	2	160	IMTM	13	EDLC	147	150	98	98	14_012	29DEC16	29DEC2016	16FEB17	16FEB2017	186	14	Early Termination	34	Male	15NOV16	186	Placebo	<250 mg/day	No	No	>=250 mg/day	No	Yes	Yes	Yes	Yes
3	3	160	IMTM							14_012	16FEB17	16FEB2017			186	14	Early Termination	34	Male	15NOV16	186	Placebo	<250 mg/day	No	No	>=250 mg/day	No	Yes	Yes	Yes	Yes
4	4	160	IMTM							14_012	02FEB17	02FEB2017			186	14	Early Termination	34	Male	15NOV16	186	Placebo	<250 mg/day	No	No	>=250 mg/day	No	Yes	Yes	Yes	Yes
1	1	160	I.M.T.M	34	I.M.T.M	126	126	100	100	14_014	15NOV16	15NOV2016	22DEC16	22DEC2016	187	14	Entered	33	Female	16NOV16	187	MF4637	<250 mg/day	No	No	>=250 mg/day	No	Yes	Yes	Yes	Yes
2	2	160	I.M.T.M	34	I.M.T.M	126	126	100	100	14_014	22DEC16	22DEC2016	07FEB17	07FEB2017	187	14	Entered	33	Female	16NOV16	187	MF4637	<250 mg/day	No	No	>=250 mg/day	No	Yes	Yes	Yes	Yes
3	3	160	I.M.T.M	34	I.M.T.M	126	126	100	100	14_014	07FEB17	07FEB2017	02MAY17	02MAY2017	187	14	Entered	33	Female	16NOV16	187	MF4637	<250 mg/day	No	No	>=250 mg/day	No	Yes	Yes	Yes	Yes
4	4	160	I.M.T.M	34	I.M.T.M	126	126	100	100	14_014	07FEB17	07FEB2017	02MAY17	02MAY2017	187	14	Entered	33	Female	16NOV16	187	MF4637	<250 mg/day	No	No	>=250 mg/day	No	Yes	Yes	Yes	Yes
1	1	160	IMTM	40	IMTM	120	126	95.24	95.24	14_016	30NOV16	30NOV2016	12JAN17	12JAN2017	209	14	Entered	51	Female	01DEC16	209	Placebo	<250 mg/day	No	No	<250 mg/day	No	Yes	Yes	Yes	Yes
3	2	160	IMTM	25	IMTM	135	138	97.83	97.83	14_016	12JAN17	12JAN2017	27FEB17	27FEB2017	209	14	Entered	51	Female	01DEC16	209	Placebo	<250 mg/day	No	No	<250 mg/day	No	Yes	Yes	Yes	Yes
4	3	160	IMTM	115	IMTM	45	105	42.86	42.86	14_016	27FEB17	27FEB2017	19MAY17	19MAY2017	209	14	Entered	51	Female	01DEC16	209	Placebo	<250 mg/day	No	No	<250 mg/day	No	Yes	Yes	Yes	Yes
5	4	160	IMTM	19	IMTM	141	141	100	100	14_016	27FEB17	27FEB2017	19MAY17	19MAY2017	209	14	Entered	51	Female	01DEC16	209	Placebo	<250 mg/day	No	No	<250 mg/day	No	Yes	Yes	Yes	Yes
1	1	160	IMTM	0	IMTM	160	126	126.98	126.98	14_018	05DEC16	05DEC2016	16JAN17	16JAN2017	210	14	Entered	25	Female	05DEC16	210	MF4637	>=250 mg/day	No	No	>=250 mg/day	No	Yes	Yes	Yes	Yes
2	2	160	IMTM	35	IMTM	125	132	94.6	94.7	14_018	16JAN17	16JAN2017	01MAR17	01MAR2017	210	14	Entered	25	Female	05DEC16	210	MF4637	>=250 mg/day	No	No	>=250 mg/day	No	Yes	Yes	Yes	Yes
3	3	160	IMTM	40	IMTM	120	120	100	100	14_018	01MAR17	01MAR2017	23MAY17	23MAY2017	210	14	Entered	25	Female	05DEC16	210	MF4637	>=250 mg/day	No	No	>=250 mg/day	No	Yes	Yes	Yes	Yes
4	4	160	IMTM	34	IMTM	126	129	97.67	97.67	14_018	01MAR17	01MAR2017	23MAY17	23MAY2017	210	14	Entered	25	Female	05DEC16	210	MF4637	>=250 mg/day	No	No	>=250 mg/day	No	Yes	Yes	Yes	Yes
1	1	160	imtm	31	imtm	129	129	100	100	14_019	15NOV16	15NOV2016	13JAN17	13JAN2017	211	14	Entered	32	Male	03DEC16	211	Placebo	<250 mg/day	No	Yes	<250 mg/day	No	Yes	Yes	Yes	Yes
2	2	160	imtm	25	imtm	135	138	97.8	97.83	14_019	13JAN17	13JAN2017	28FEB17	28FEB2017	211	14	Entered	32	Male	03DEC16	211	Placebo	<250 mg/day	No	Yes	<250 mg/day	No	Yes	Yes	Yes	Yes
3	3	160	imtm	40	imtm	120	120	100	100	14_019	28FEB17	28FEB2017	18MAY17	18MAY2017	211	14	Entered	32	Male	03DEC16	211	Placebo	<250 mg/day	No	Yes	<250 mg/day	No	Yes	Yes	Yes	Yes
4	4	160	imtm	40	imtm	120	120	100	100	14_019	28FEB17	28FEB2017	18MAY17	18MAY2017	211	14	Entered	32	Male	03DEC16	211	Placebo	<250 mg/day	No	Yes	<250 mg/day	No	Yes	Yes	Yes	Yes
1	1	160	LL				111			15_002	27SEP16	27SEP2016			149	15	Entered	67	Male	27SEP16	149	Placebo	<250 mg/day	No	No	<250 mg/day	No	Yes	Yes	Yes	Yes
2	2	160	LL				129			15_002	27SEP16	27SEP2016			149	15	Entered	67	Male	27SEP16	149	Placebo	<250 mg/day	No	No	<250 mg/day	No	Yes	Yes	Yes	Yes
3	3	160	LL				160			15_002	27SEP16	27SEP2016			149	15	Entered	67	Male	27SEP16	149	Placebo	<250 mg/day	No	No	<250 mg/day	No	Yes	Yes	Yes	Yes
5	4	160	LL				89			15_002	27SEP16	27SEP2016			149	15	Entered	67	Male	27SEP16	149	Placebo	<250 mg/day	No	No	<250 mg/day	No	Yes	Yes	Yes	Yes
1	1	160	LL				120			15_005	28SEP16	28SEP2016			150	15	Entered	58	Male	28SEP16	150	Placebo	<250 mg/day	No	No	>=250 mg/day	No	Yes	Yes	Yes	Yes
2	2	160	LL				126			15_005	28SEP16	28SEP2016			150	15	Entered	58	Male	28SEP16	150	Placebo	<250 mg/day	No	No	>=250 mg/day	No	Yes	Yes	Yes	Yes
3	3	160	LL	0	LL	160	160	100	100	15_005	28SEP16	28SEP2016	14MAR17	14MAR2017	150	15	Entered	58	Male	28SEP16	150	Placebo	<250 mg/day	No	No	>=250 mg/day	No	Yes	Yes	Yes	Yes
5	4	160	LL	74	LL	86	86	100	100	15_005	28SEP16	28SEP2016	14MAR17	14MAR2017	150	15	Entered	58	Male	28SEP16	150	Placebo	<250 mg/day	No	No	>=250 mg/day	No	Yes	Yes	Yes	Yes
1	1	160	LL				126			15_006	27SEP16	27SEP2016			148	15	Entered	69	Male	27SEP16	148	MF4637	<250 mg/day	No	No	>=250 mg/day	No	Yes	Yes	Yes	Yes
2	2	160	LL				123			15_006	27SEP16	27SEP2016			148	15	Entered	69	Male	27SEP16	148	MF4637	<250 mg/day	No	No	>=250 mg/day	No	Yes	Yes	Yes	Yes
3	3	160	LL				160			15_006	27SEP16	27SEP2016			148	15	Entered	69	Male	27SEP16	148	MF4637	<250 mg/day	No	No	>=250 mg/day	No	Yes	Yes	Yes	Yes
5	4	160	LL				92			15_006	27SEP16	27SEP2016			148	15	Entered	69	Male	27SEP16	148	MF4637	<250 mg/day	No	No	>=250 mg/day	No	Yes	Yes	Yes	Yes
1	1	160	LL	37	LL	123	123	100	100	15_007	29SEP16	29SEP2016	14MAR17	14MAR2017	236	15	Entered	74	Male	29SEP16	236	Placebo	<250 mg/day	No	No	>=250 mg/day	No	Yes	Yes	Yes	Yes
2	2	160	LL				129			15_007	29SEP16	29SEP2016			236	15	Entered	74	Male	29SEP16	236	Placebo	<250 mg/day	No	No	>=250 mg/day	No	Yes	Yes	Yes	Yes
3	3	160	LL				160			15_007	29SEP16	29SEP2016			236	15	Entered	74	Male	29SEP16	236	Placebo	<250 mg/day	No	No	>=250 mg/day	No	Yes	Yes	Yes	Yes
4	4	160	LL	142	LL	89	89	100	100	15_007	30JAN17	30JAN2017	14MAR17	14MAR2017	236	15	Entered	74	Male	29SEP16	236	Placebo	<250 mg/day	No	No	>=250 mg/day	No	Yes	Yes	Yes	Yes
1	1	160	LL				126			15_008	28SEP16	28SEP2016			151	15	Entered	55	Male	28SEP16	151	MF4637	<250 mg/day	No	No	<250 mg/day	No	Yes	Yes	Yes	Yes
2	2	160	LL				147			15_008	28SEP16	28SEP2016			151	15	Entered	55	Male	28SEP16	151	MF4637	<250 mg/day	No	No	<250 mg/day	No	Yes	Yes	Yes	Yes
3	3	160	LL	0	LL	160	160	100	100	15_008	28SEP16	28SEP2016	15MAR17	15MAR2017	151	15	Entered	55	Male	28SEP16	151	MF4637	<250 mg/day	No	No	<250 mg/day	No	Yes	Yes	Yes	Yes
4	4	160	LL	89	LL	71	71	100	100	15_008	30JAN17	30JAN2017	15MAR17	15MAR2017	151	15	Entered	55	Male	28SEP16	151	MF4637	<250 mg/day	No	No	<250 mg/day	No	Yes	Yes	Yes	Yes
1	1	160	LL				126			15_009	10OCT16	10OCT2016			237	15	Entered	70	Female	10OCT16	237	MF4637	<250 mg/day	No	No	<250 mg/day	No	Yes	Yes	Yes	Yes
2	2	160	LL				156			15_009	10OCT16	10OCT2016			237	15	Entered	70	Female	10OCT16	237	MF4637	<250 mg/day	No	No	<250 mg/day	No	Yes	Yes	Yes	Yes
3	3	160	LL	0	LL	160	160	100	100	15_009	10OCT16	10OCT2016	14MAR17	14MAR2017	237	15	Entered	70	Female	10OCT16	237	MF4637	<250 mg/day	No	No	<250 mg/day	No	Yes	Yes	Yes	Yes
4	4	160	LL	95	LL	65	65	100	100	15_009	30JAN17	30JAN2017	14MAR17	14MAR2017	237	15	Entered	70	Female	10OCT16	237	MF4637	<250 mg/day	No	No	<250 mg/day	No	Yes	Yes	Yes	Yes
1	1	160	LL	40	LL	120	126	95.24	95.24	15_010	11OCT16	11OCT2016	22NOV16	22NOV2016	238	15	Entered	64	Female	11OCT16	238	Placebo	<250 mg/day	No	No	<250 mg/day	No	Yes	Yes	Yes	Yes
2	2	160	LL	0	LL	160	168	95.24	95.24	15_010	11OCT16	11OCT2016	17JAN17	17JAN2017	238	15	Entered	64	Female	11OCT16	238	Placebo	<250 mg/day	No	No	<250 mg/day	No	Yes	Yes	Yes	Yes
3	3	160	LL	0	LL	160	160	100	100	15_010	11OCT16	11OCT2016	31MAR17	31MAR2017	238	15	Entered	64	Female	11OCT16	238	Placebo	<250 mg/day	No	No	<250 mg/day	No	Yes	Yes	Yes	Yes
4	4	160	LL				59			15_010	11OCT16	11OCT2016			238	15	Entered	64	Female	11OCT16	238	Placebo	<250 mg/day	No	No	<250 mg/day	No	Yes	Yes	Yes	Yes
1	1	160	LL	0	LL	150	150	100	100	15_011	13OCT16	13OCT2016	23NOV16	23NOV2016	240	15	Entered	66	Male	13OCT16	240	Placebo	<250 mg/day	No	No	<250 mg/day	No	Yes	Yes	Yes	Yes
2	2	160	LL	10	LL	123	129	95.35	95.35	15_011	13OCT16	13OCT2016	05JAN17	05JAN2017	240	15	Entered	66	Male	13OCT16	240	Placebo	<250 mg/day	No	No	<250 mg/day	No	Yes	Yes	Yes	Yes
3	3	160	LL	37	LL	160	160	100	100	15_011	13OCT16	13OCT2016	28MAR17	28MAR2017	240	15	Entered	66	Male	13OCT16	240	Placebo	<250 mg/day	No	No	<250 mg/day	No	Yes	Yes	Yes	Yes
4	4	160	LL				56			15_011	13OCT16	13OCT2016			240	15	Entered	66	Male	13OCT16	240	Placebo	<250 mg/day	No	No	<250 mg/day	No	Yes	Yes	Yes	Yes
1	1	160	LL	0	LL	126	126	100	100	15_012	19OCT16	19OCT2016	30NOV16	30NOV2016	157	15	Entered	54	Female	19OCT16	241	Placebo	<250 mg/day	No	No	<250 mg/day	No	Yes	Yes	Yes	Yes
2	2	160	LL				123			15_012	19OCT16	19OCT2016			157	15	Entered	54	Female	19OCT16	241	Placebo	<250 mg/day	No	No	<250 mg/day	No	Yes	Yes	Yes	Yes
3	3	160	LL	0	LL	160	160	100	100	15_012	19OCT16	19OCT2016	31MAR17	31MAR2017	157	15	Entered	54	Female	19OCT16	241	Placebo	<250 mg/day	No	No	<250 mg/day	No	Yes	Yes	Yes	Yes
4	4	160	LL	0	LL	77	77	100	100	15_012	19OCT16	19OCT2016	31MAR17	31MAR2017	157	15	Entered	54	Female	19OCT16	241	Placebo	<250 mg/day	No	No	<250 mg/day	No	Yes	Yes	Yes	Yes
1	1	160	LL				123			15_013	13OCT16	13OCT2016			242	15	Entered	58	Female	13OCT16	242	MF4637	<250 mg/day	No	No	>=250 mg/day	No	Yes	Yes	Yes	Yes
2	2	160	LL	37	LL	123	129	95.35	95.35	15_013	13OCT16	13OCT2016	05JAN17	05JAN2017	242	15	Entered	58	Female	13OCT16	242	MF4637	<250 mg/day	No	No	>=250 mg/day	No	Yes	Yes	Yes	Yes
3	3	160	LL	0	LL	160	160	100	100	15_013	13OCT16	13OCT2016	28MAR17	28MAR2017	242	15	Entered	58	Female	13OCT16	242	MF4637	<250 mg/day	No	No	>=250 mg/day	No	Yes	Yes	Yes	Yes
5	4	160	LL				86			15_013	13OCT16	13OCT2016	28MAR17	28MAR2017	242	15	Entered	58	Female	13OCT16	242	MF4637	<250 mg/day	No	No	>=250 mg/day	No	Yes	Yes	Yes	Yes
1	1	160	LL				126			15_014	13OCT16	13OCT2016			239	15	Entered	55	Female	13OCT16	239	MF4637	<250 mg/day	No	No	>=250 mg/day	No	Yes	Yes	Yes	Yes
2	2	160	LL				135			15_014	13OCT16	13OCT2016			239	15	Entered	55	Female	13OCT16	239	MF4637	<250 mg/day	No	No	>=250 mg/day	No	Yes	Yes	Yes	Yes
3	3	160	LL				160			15_014	13OCT16	13OCT2016			239	15	Entered	55	Female	13OCT16	239	MF4637	<250 mg/day	No	No	>=250 mg/day	No	Yes	Yes	Yes	Yes
4	4	160	LL				83			15_014	13OCT16	13OCT2016			239	15	Entered	55	Female	13OCT16	239	MF4637	<250 mg/day	No	No	>=250 mg/day	No	Yes	Yes	Yes	Yes
1	1	160	LL				126			15_015	09NOV16	09NOV2016			268	15	Entered	81	Female	09NOV16	268	MF4637	<250 mg/day	No	No	<250 mg/day	No	Yes	Yes	Yes	Yes
2	2	160	LL				123			15_015	21DEC16	21DEC2016			268	15	Entered	81	Female	09NOV16	268	MF4637	<250 mg/day	No	No	<250 mg/day	No	Yes	Yes	Yes	Yes
3	3	160	LL	75	LL	85	95	89.5	89.47	15_015	01FEB17	01FEB2017	27APR17	27APR2017	268	15	Entered	81	Female	09NOV16	268	MF4637	<250 mg/day	No	No	<250 mg/day	No	Yes	Yes	Yes	Yes
5	4	160	LL				160			15_015	01FEB17	01FEB2017			268	15	Entered	81	Female	09NOV16	268	MF4637	<250 mg/day	No	No	<250 mg/day	No	Yes	Yes	Yes	Yes
1	1	160	LL	37	LL	123	129	95.35	95.35	15_016	09NOV16	09NOV2016	22DEC17	22DEC2017	243	15	Entered	77	Female	09NOV16	243	MF4637	<250 mg/day	Yes	No	>=250 mg/day	No	Yes	Yes	Yes	Yes
2	2	160	LL	43	LL	117	120	97.5	97.5	15_016	09NOV16	09NOV2016	31JAN17	31JAN2017	243	15	Entered	77	Female	09NOV16	243	MF4637	<250 mg/day	Yes	No	>=250 mg/day	No	Yes	Yes	Yes	Yes
3	3	160	LL	0	LL	160	160	100	100	15_016	31JAN17	31JAN2017	27APR17	27APR2017	243	15	Entered	77	Female	09NOV16	243	MF4637	<250 mg/day	Yes	No	>=250 mg/day	No	Yes	Yes	Yes	Yes
4	4	160	LL	62	LL	98	98	100	100	15_016	31JAN17	31JAN2017	27APR17	27APR2017	243	15	Entered	77	Female	09NOV16	243	MF4637	<250 mg/day	Yes	No	>=250 mg/day	No	Yes	Yes	Yes	Yes
1	1	160	LL	37	LL	120	123	97.56	97.56	15_017	10NOV16	10NOV2016	04MAR17	04MAR2017	270	15	Entered	62	Male	10NOV16	270	Placebo	<250 mg/day	No	No	<250 mg/day	No	Yes	Yes	Yes	No
2	2	160	LL			0	123		0	15_017	21DEC16	21DEC2016			270	15	Entered	62	Male	10NOV16	270	Placebo	<250 mg/day	No	No	<250 mg/day	No	Yes	Yes	Yes	No
3	3	160	LL			0	160		0	15_017	04MAR17	04MAR2017			270	15	Entered	62	Male	10NOV16	270	Placebo	<250 mg/day	No	No	<250 mg/day	No	Yes	Yes	Yes	No
4	4	160	LL			0	158		0	15_017	04MAR17	04MAR2017			270	15	Entered	62	Male	10NOV16	270	Placebo	<250 mg/day	No	No	<250 mg/day	No	Yes	Yes	Yes	No
1	1	160	LL				126			15_018	15NOV16	15NOV2016			269	15	Entered	57	Male	15NOV16	269	MF4637	<250 mg/day	No	No	<250 mg/day	No	Yes	Yes	Yes	Yes
2	2	160	LL				126			15_018	15NOV16	15NOV2016			269	15	Entered	57	Male	15NOV16	269	MF4637	<250 mg/day	No	No	<250 mg/day	No	Yes	Yes	Yes	Yes
3	3	160	LL	0	LL	160	160	100	100	15_018	07FEB17	07FEB2017	28APR17	28APR2017	269	15	Entered	57	Male	15NOV16	269	MF4637	<250 mg/day	No	No	<250 mg/day	No	Yes	Yes	Yes	Yes
4	4	160	LL	84	LL	74	80	92.5	92.5	15_018	07FEB17	07FEB2017	28APR17	28APR2017	269	15	Entered	57	Male	15NOV16	269	MF4637	<250 mg/day	No	No	<250 mg/day	No	Yes	Yes	Yes	Yes
1	1	160	LL				126			15_019	17NOV16	17NOV2016			271	15	Entered	38	Female	17NOV16	271	Placebo	<250 mg/day	No	No	>=250 mg/day	No	Yes	Yes	Yes	Yes
2	2	160	LL	65	LL	123	123	100	100	15_019	17NOV16	17NOV2016	08FEB17	08FEB2017	271	15	Entered	38	Female	17NOV16	271	Placebo	<250 mg/day	No	No	>=250 mg/day	No	Yes	Yes	Yes	Yes
3	3	160	LL	0	LL	160	160	100	100	15_019	08FEB17	08FEB2017	28APR17	28APR2017	271	15	Entered	38	Female	17NOV16	271	Placebo	<250 mg/day	No	No	>=250 mg/day	No	Yes	Yes	Yes	Yes
4	4	160	LL	89	LL	71	77	92.21	92.21	15_019	08FEB17	08FEB2017	28APR17	28APR2017	271	15	Entered	38	Female	17NOV16	271	Placebo	<250 mg/day	No	No	>=250 mg/day	No	Yes	Yes	Yes	Yes
1	1	160	LL				123			15_020	30NOV16	30NOV2016			272	15	Early Termination	65	Female	30NOV16	272	MF4637	<250 mg/day	No	No	>=250 mg/day	No	Yes	Yes	Yes	Yes
2	2	160	LL	40	LL	120	126	95.24	95.24	15_020	11JAN17	11JAN2017	22FEB17	22FEB2017	272	15	Early Termination	65	Female	30NOV16	272	MF4637	<250 mg/day	No	No	>=250 mg/day	No	Yes	Yes	Yes	Yes
5	3	160	LL				160			15_020					272	15	Early Termination	65	Female	30NOV16	272	MF4637	<250 mg/day	No	No	>=250 mg/day	No	Yes	Yes	Yes	Yes
6	4	160					101			15_020					272	15	Early Termination	65	Female	30NOV16	272	MF4637	<250 mg/day	No	No	>=250 mg/day	No	Yes	Yes	Yes	Yes
1	1	160	LL							15_021	02DEC16	02DEC2016			273	15	Entered	41	Male	02DEC16	273	Placebo	<250 mg/day	No	No	>=250 mg/day	No	Yes	Yes	Yes	Yes
2	2	160	LL	37	LL	123	126	97.62	97.62	15_021	12JAN17	12JAN2017	23FEB17	23FEB2017	273	15	Entered	41	Male	02DEC16	273	Placebo	<250 mg/day	No	No	>=250 mg/day	No	Yes	Yes	Yes	Yes
3	3	160	LL	0	LL	160	160	100	100	15_021	23FEB17	23FEB2017	18MAY17	18MAY2017	273	15	Entered	41	Male	02DEC16	273	Placebo	<250 mg/day	No	No	>=250 mg/day	No	Yes	Yes	Yes	Yes
4	4	160	LL	74	LL	86	92	93.48	93.48	15_021	23FEB17	23FEB2017	18MAY17	18MAY2017	273	15	Entered	41	Male	02DEC16	273	Placebo	<250 mg/day	No	No	>=250 mg/day	No	Yes	Yes	Yes	Yes
1	1	160	LL	40	LL	120	123	97.56	97.56	15_022	09DEC16	09DEC2016	19JAN17	19JAN2017	274	15	Entered	48	Male	09DEC16	274	Placebo	<250 mg/day	No	No	<250 mg/day	No	Yes	Yes	Yes	Yes
2	2	160	LL	46	LL	114	120	95	95	15_022	09DEC16	09DEC2016	28FEB17	28FEB2017	274	15	Entered	48	Male	09DEC16	274	Placebo	<250 mg/day	No	No	<250 mg/day	No	Yes	Yes	Yes	Yes
3	3	160	LL	0	LL	160	160	100	100	15_022	09DEC16	09DEC2016	25MAY17	25MAY2017	274	15	Entered	48	Male	09DEC16	274	Placebo	<250 mg/day	No	No	<250 mg/day	No	Yes	Yes	Yes	Yes
4	4	160	LL				107			15_022	09DEC16	09DEC2016			274	15	Entered	48	Male	09DEC16	274	Placebo	<250 mg/day	No	No	<250 mg/day	No	Yes	Yes	Yes	Yes
1	1	160	LL	40	NA	120	129	93.02	93.02	15_023	06DEC16	06DEC2016	01MAR17	01MAR2017	275	15	Entered	58	Female	06DEC16	275	MF4637	<250 mg/day	No	No	>=250 mg/day	No	Yes	Yes	Yes	Yes
2	2	160	LL	34	NA	126	126	100	100	15_023	06DEC16	06DEC2016	01MAR17	01MAR2017	275	15	Entered	58	Female	06DEC16	275	MF4637	<250 mg/day	No	No	>=250 mg/day	No	Yes	Yes	Yes	Yes
3	3	160	LL				160			15_023	06DEC16	06DEC2016			275	15	Entered	58	Female	06DEC16	275	MF4637	<250 mg/day	No	No	>=250 mg/day	No	Yes	Yes	Yes	Yes
4	4	160	LL				95			15_023	06DEC16	06DEC2016			275	15	Entered	58	Female	06DEC16	275	MF4637	<250 mg/day	No	No	>=250 mg/day	No	Yes	Yes	Yes	Yes
1	1	160	P-F	34	P-F	126	126	100	100	16_001	31OCT16	31OCT2016	12DEC16	12DEC2016	152	16	Early Termination	53	Male	31OCT16	152	Placebo	<250 mg/day	No	No	<250 mg/day	No	Yes	Yes	Yes	Yes
2	2	160	P-F	7	P-F	153	153	100	100	16_001	12DEC16	12DEC2016	01FEB17	01FEB2017	152	16	Early Termination	53	Male	31OCT16	152	Placebo	<250 mg/day	No	No	<250 mg/day	No	Yes	Yes	Yes	Yes
1	1	160	MN	43	MN	117	117	100	100	16_002	03NOV16	03NOV2016	12DEC16	12DEC2016	154	16	Early Termination	53	Male	03NOV16	154	MF4637	<250 mg/day	No	No	<250 mg/day	No	Yes	Yes	Yes	Yes
2	2	160	MN	31	PF	129	129	100	100	16_002	12DEC16	12DEC2016	24JAN17	24JAN2017	154	16	Early Termination	53	Male	03NOV16	154	MF4637	<250 mg/day	No	No	<250 mg/day	No	Yes	Yes	Yes	Yes
1	1	160	P-F	37	I-V	123	123	100	100	16_003	03NOV16	03NOV2016	14DEC16	14DEC2016	153	16	Entered	59	Male	03NOV16	153	Placebo	>=250 mg/day	No	No	>=250 mg/day	No	Yes	Yes	Yes	Yes
2	2	160	I-V	42	P-F	118	129	91.5	91.47	16_003	14DEC16	14DEC2016	26JAN17	26JAN2017	153	16	Entered	59	Male	03NOV16	153	Placebo	>=250 mg/day	No	No	>=250 mg/day	No	Yes	Yes	Yes	Yes
3	3	160	P-F	0	P-F	160	160	100	100	16_003	26JAN17	26JAN2017	27APR17	27APR2017	153	16	Entered	59	Male	03NOV16	153	Placebo	>=250 mg/day	No	No	>=250 mg/day	No	Yes	Yes	Yes	Yes
4	4	160	P-F	47	P-F	113	113	100	100	16_003	26JAN17	26JAN2017	27APR17	27APR2017	153	16	Entered	59	Male	03NOV16	153	Placebo	>=250 mg/day	No	No	>=250 mg/day	No	Yes	Yes	Yes	Yes
1	1	160	I-V	43	I-V	117	117	100	100	16_005	11NOV16	11NOV2016	20DEC16	20DEC2016	155	16	Entered	60	Male	12NOV16	155	MF4637	<250 mg/day	No	No	<250 mg/day	No	Yes	Yes	Yes	Yes
2	2	160	I-V	25	P-F	135	135	100	100	16_005	20DEC16	20DEC2016	03FEB17	03FEB2017	155	16	Entered	60	Male	12NOV16	155	MF4637	<250 mg/day	No	No	<250 mg/day	No	Yes	Yes	Yes	Yes
3	3	160	P-F	0	P-F	160	160	100	100	16_005	03FEB17	03FEB2017	28APR17	28APR2017	155	16	Entered	60	Male	12NOV16	155	MF4637	<250 mg/day	No	No	<250 mg/day	No	Yes	Yes	Yes	Yes
4	4	160	P-F	68	P-F	92	92	100	100	16_005	03FEB17	03FEB2017	28APR17	28APR2017	155	16	Entered	60	Male	12NOV16	155	MF4637	<250 mg/day	No	No	<250 mg/day	No	Yes	Yes	Yes	Yes
1	1	160	P-F	31	M-N	129	129	100	100	16_007	28NOV16	28NOV2016	10JAN17	10JAN2017	156	16	Entered	57	Female	28NOV16	156	Placebo	>=250 mg/day	No	No	>=250 mg/day	No	Yes	Yes	Yes	Yes
2	2	160	M-N	34	M-N	126	126	100	100	16_007	10JAN17	10JAN2017	21FEB17	21FEB2017	156	16	Entered	57	Female	28NOV16	156	Placebo	>=250 mg/day	No	No	>=250 mg/day	No	Yes	Yes	Yes	Yes
3	3	160	M-N	0	M-N	160	160	100	100	16_007	21FEB17	21FEB2017	10MAY17	10MAY2017	156	16	Entered	57	Female	28NOV16	156	Placebo	>=250 mg/day	No	No	>=250 mg/day	No	Yes	Yes	Yes	Yes
4	4	160	M-N	86	M-N	74	74	100	100	16_007	21FEB17	21FEB2017	10MAY17	10MAY2017	156	16	Entered	57	Female	28NOV16	156	Placebo	>=250 mg/day	No	No	>=250 mg/day	No	Yes	Yes	Yes	Yes
1	1	160	MN	1	MN	159	183	86.9	86.89	16_008	18NOV16	18NOV2016	17JAN17	17JAN2017	158	16	Entered	58	Female	18NOV16	158	MF4637	>=250 mg/day	No	No	>=250 mg/day	No	Yes	Yes	Yes	Yes
2	2	160	MN	76	MN	84	84	100	100	16_008	17JAN17	17JAN2017	14FEB17	14FEB2017	158	16	Entered	58	Female	18NOV16	158	MF4637	>=250 mg/day	No	No	>=250 mg/day	No	Yes	Yes	Yes	Yes
3	3	160	M-N	0	M-N	160	160	100	100	16_008	17JAN17	17JAN2017	16MAY17	16MAY2017	158	16	Entered	58	Female	18NOV16	158	MF4637	>=250 mg/day	No	No	>=250 mg/day	No	Yes	Yes	Yes	Yes
4	4	160	M-N	47	M-N	113	113	100	100	16_008	17JAN17	17JAN2017	16JUN17	16JUN2017	158	16	Entered	58	Female	18NOV16	158	MF4637	>=250 mg/day	No	No	>=250 mg/day	No	Yes	Yes	Yes	Yes
4	1	160	MB	34	MB	126	126	100	100	17_001	08NOV16	08NOV2016	20DEC16	20DEC2016	212	17	Entered	71	Male	08NOV16	212	Placebo	<250 mg/day	No	No	<250 mg/day	No	Yes	Yes	Yes	Yes
5	2	160	MB	37	MB	123	123	100	100	17_001	20DEC16	20DEC2016	30JAN17	30JAN2017	212	17	Entered	71	Male	08NOV16	212	Placebo	<250 mg/day	No	No	<250 mg/day	No	Yes	Yes	Yes	Yes
6	3	160	MB	0	MB	160	160	100	100	17_001	30JAN17	30JAN2017	26APR17	26APR2017	212	17	Entered	71	Male	08NOV16	212	Placebo	<250 mg/day	No	No	<250 mg/day	No	Yes	Yes	Yes	Yes
7	4	160	MB	62	MB	98	98	100	100	17_001	30JAN17	30JAN2017	26APR17	26APR2017	212	17	Entered	71	Male	08NOV16	212	Placebo	<250 mg/day	No	No	<250 mg/day	No	Yes	Yes	Yes	Yes
1	1	160	MB	34	MB	126	126	100	100	17_002	10NOV16	10NOV2016	22DEC16	22DEC2016	192	17	Entered	70	Female	10NOV16	192	MF4637	<250 mg/day	Yes	No	<250 mg/day	No	Yes	Yes	Yes	Yes
2	2	160	mb	37	MB	123	123	100	100	17_002	22DEC16	22DEC2016	01FEB17	01FEB2017	192	17	Entered	70	Female	10NOV16	192	MF4637	<250 mg/day	Yes	No	<250 mg/day	No	Yes	Yes	Yes	Yes
3	3	160	MB	0	MB	160	160	100	100	17_002	01FEB17	01FEB2017	26APR17	26APR2017	192	17	Entered	70	Female	10NOV16	192	MF4637	<250 mg/day	Yes	No	<250 mg/day	No	Yes	Yes	Yes	Yes
4	4	160	MB	71	MB	89	89	100	100	17_002	01FEB17	01FEB2017	26APR17	26APR2017	192	17	Entered	70	Female	10NOV16	192	MF4637	<250 mg/day	Yes	No	<250 mg/day	No	Yes	Yes	Yes	Yes
1	1	160	MB	34	MB	126	126	100	100	17_003	10NOV16	10NOV2016	22DEC16	22DEC2016	193	17	Entered	62	Female	10NOV16	193	MF4637	>=250 mg/day	Yes	No	<250 mg/day	No	Yes	Yes	Yes	Yes
2	2	160	MB	37	MB	123	123	100	100	17_003	22DEC16	22DEC2016	01FEB17	01FEB2017	193	17	Entered	62	Female	10NOV16	193	MF4637	>=250 mg/day	Yes	No	<250 mg/day	No	Yes	Yes	Yes	Yes
3	3	160	MB	0	MB	160	160	100	100	17_003	01FEB17	01FEB2017	28APR17	28APR2017	193	17	Entered	62	Female	10NOV16	193	MF4637	>=250 mg/day	Yes	No	<250 mg/day	No	Yes	Yes	Yes	Yes
4	4	160	MB	62	MB	98	98	100	100	17_003	01FEB17	01FEB2017	28APR17	28APR2017	193	17	Entered	62	Female	10NOV16	193	MF4637	>=250 mg/day	Yes	No	<250 mg/day	No	Yes	Yes	Yes	Yes
1	1	160	MB	34	MB	126	126	100	100	17_005	16NOV16	16NOV2016	27DEC16	27DEC2016	213	17	Entered	65	Female	16NOV16	213	MF4637	<250 mg/day	No	No	<250 mg/day	No	Yes	Yes	Yes	Yes
2	2	160	MB	34	MB	126	126	100	100	17_005	27DEC16	27DEC2016	08FEB17	08FEB2017	213	17	Entered	65	Female	16NOV16	213	MF4637	<250 mg/day	No	No	<250 mg/day	No	Yes	Yes	Yes	Yes
1	1	160	MB	34	MB	126	126	100	100	17_006	21NOV16	21NOV2016	03JAN17	03JAN2017	194	17	Entered	61	Female	21NOV16	194	Placebo	<250 mg/day	No	No	<250 mg/day	No	Yes	Yes	Yes	Yes
2	2	160	MB	34	MB	126	126	100	100	17_006	03JAN17	03JAN2017	14FEB17	14FEB2017	194	17	Entered	61	Female	21NOV16	194	Placebo	<250 mg/day	No	No	<250 mg/day	No	Yes	Yes	Yes	Yes
3	3	160	MB	0	MB	160	160	100	100	17_006	14FEB17	14FEB2017	09MAY17	09MAY2017	194	17	Entered	61	Female	21NOV16	194	Placebo	<250 mg/day	No	No	<250 mg/day	No	Yes	Yes	Yes	Yes
4	4	160	MB	68	MB	92	92	100	100	17_006	14FEB17	14FEB2017	09MAY17	09MAY2017	194	17	Entered	61	Female	21NOV16	194	Placebo	<250 mg/day	No	No	<250 mg/day	No	Yes	Yes	Yes	Yes
1	1	160	MB	34	MB	126	126	100	100	17_007	21NOV16	21NOV2016	03JAN17	03JAN2017	214	17	Entered	61	Male	21NOV16	214	MF4637	<250 mg/day	No	No	<250 mg/day	No	Yes	Yes	Yes	Yes
2	2	160	MB	34	MB	126	126	100	100	17_007	03JAN17	03JAN2017	14FEB17	14FEB2017	214	17	Entered	61	Male	21NOV16	214	MF4637	<250 mg/day	No	No	<250 mg/day	No	Yes	Yes	Yes	Yes
3	3	160	MB	0	MB	160	160	100	100	17_007	14FEB17	14FEB2017	08MAY17	08MAY2017	214	17	Entered	61	Male	21NOV16	214	MF4637	<250 mg/day	No	No	<250 mg/day	No	Yes	Yes	Yes	Yes
4	4	160	MB	71	MB	89	89	100	100	17_007	14FEB17	14FEB2017	08MAY17	08MAY2017	214	17	Entered	61	Male	21NOV16	214	MF4637	<250 mg/day	No	No	<250 mg/day	No	Yes	Yes	Yes	Yes
1	1	160	MB				126			17_008	25NOV16	25NOV2016			195	17	Entered	67	Female	25NOV16	195	Placebo	<250 mg/day	Yes	No	<250 mg/day	No	Yes	Yes	Yes	Yes
2	2	160	MB	37	MB	123	123	100	100	17_008	06JAN17	06JAN2017	16FEB17	16FEB2017	195	17	Entered	67	Female	25NOV16	195	Placebo	<250 mg/day	Yes	No	<250 mg/day	No	Yes	Yes	Yes	Yes
3	3	160	MB				160			17_008	16FEB17	16FEB2017			195	17	Entered	67	Female	25NOV16	195	Placebo	<250 mg/day	Yes	No	<250 mg/day	No	Yes	Yes	Yes	Yes
4	4	160	MB	68	MB	92	92	100	100	17_008	16FEB17	16FEB2017	12MAY17	12MAY2017	195	17	Entered	67	Female	25NOV16	195	Placebo	<250 mg/day	Yes	No	<250 mg/day	No	Yes	Yes	Yes	Yes
1	1	160	MB	34	MB	126	126	100	100	17_009	25NOV16	25NOV2016	06JAN17	06JAN2017	215	17	Entered	70	Male	25NOV16	215	Placebo	<250 mg/day	No	No	<250 mg/day	No	Yes	Yes	Yes	Yes
2	2	160	MB	37	MB	123	123	100	100	17_009	06JAN17	06JAN2017	16FEB17	16FEB2017	215	17	Entered	70	Male	25NOV16	215	Placebo	<250 mg/day	No	No	<250 mg/day	No	Yes	Yes	Yes	Yes
3	3	160	MB	0	MB	160	160	100	100	17_009	16FEB17	16FEB2017	12MAY17	12MAY2017	215	17	Entered	70	Male	25NOV16	215	Placebo	<250 mg/day	No	No	<250 mg/day	No	Yes	Yes	Yes	Yes
4	4	160	MB	68	MB	92	92	100	100	17_009	16FEB17	16FEB2017	12MAY17	12MAY2017	215	17	Entered	70	Male	25NOV16	215	Placebo	<250 mg/day	No	No	<250 mg/day	No	Yes	Yes	Yes	Yes
1	1	160	MB	34	MB	126	126	100	100	17_010	25NOV16	25NOV2016	06JAN17	06JAN2017	230	17	Entered	68	Female	25NOV16	230	MF4637	<250 mg/day	No	No	<250 mg/day	No	Yes	Yes	Yes	Yes
2	2	160	MB	37	MB	123	123	100	100	17_010	06JAN17	06JAN2017	16FEB17	16FEB2017	230	17	Entered	68	Female	25NOV16	230	MF4637	<250 mg/day	No	No	<250 mg/day	No	Yes	Yes	Yes	Yes
3	3	160	MB	0	MB	160	160	100	100	17_010	16FEB17	16FEB2017	12MAY17	12MAY2017	230	17	Entered	68	Female	25NOV16	230	MF4637	<250 mg/day	No	No	<250 mg/day	No	Yes	Yes	Yes	Yes
4	4	160	MB	68	MB	98	98	100	100	17_010	16FEB17	16FEB2017	12MAY17	12MAY2017	230	17	Entered	68	Female	25NOV16	230	MF4637	<250 mg/day	No	No	<250 mg/day	No	Yes	Yes	Yes	Yes
2	1	160	mg	10	mep	150	159	94.34	94.34	18_001	17OCT16	17OCT2016	09DEC16	09DEC2016	220	18	Entered	46	Female	18OCT16	220	Placebo	<250 mg/day	No	No	<250 mg/day	No	Yes	Yes	Yes	Yes
3	2	160	mg	67	mg	93	93	100	100	18_001	09DEC16	09DEC2016	09JAN17	09JAN2017	220	18	Entered	46	Female	18OCT16	220	Placebo	<250 mg/day	No	No	<250 mg/day	No	Yes	Yes	Yes	Yes
4	3	160	mep	0	mep	160	160	100	100	18_001	09JAN17	09JAN2017	12APR17	12APR2017	220	18	Entered	46	Female	18OCT16	220	Placebo	<250 mg/day	No	No	<250 mg/day	No	Yes	Yes	Yes	Yes
5	4	160	mep	49	mep	111	116	95.69	95.69	18_001	09JAN17	09JAN2017	12APR17	12APR2017	220	18	Entered	46	Female	18OCT16	220	Placebo	<250 mg/day	No	No	<250 mg/day	No	Yes	Yes	Yes	Yes
1	1	160	MG	31	MEP	129	126	102.38	102.38	18_002	24OCT16	24OCT2016	05DEC16	05DEC2016	222	18	Entered	52	Female	24OCT16	222	MF4637	<250 mg/day	No	No	<250 mg/day	No	Yes	Yes	Yes	Yes
2	2	160	mep	46	mg	114	126	90.48	90.48	18_002	05DEC16	05DEC2016	16JAN17	16JAN2017	222	18	Entered	52	Female	24OCT16	222	MF4637	<250 mg/day	No	No	<250 mg/day	No	Yes	Yes	Yes	Yes
3	3	160	mep	0	mep	160	160	100	100	18_002	16JAN17	16JAN2017	10APR17	10APR2017	222	18	Entered	52	Female	24OCT16	222	MF4637	<250 mg/day	No	No	<250 mg/day	No	Yes	Yes	Yes	Yes
4	4	160	mep	71	mep	89	92	96.74	96.74	18_002	16JAN17	16JAN2017	10APR17	10APR2017	222	18	Entered	52	Female	24OCT16	222	MF4637	<250 mg/day	No	No	<250 mg/day	No	Yes	Yes	Yes	Yes
1	1	160	mep	37	mg	123	126	97.62	97.62	18_003	26OCT16	26OCT2016	07DEC16	07DEC2016	221	18	Entered	55	Female	26OCT16	221	Placebo	>=250 mg/day	Yes	Yes	>=250 mg/day	No	Yes	Yes	Yes	Yes
2	2	160	mg	46	mep	114	126	90.48	90.48	18_003	07DEC16	07DEC2016	18JAN17	18JAN2017	221	18	Entered	55	Female	26OCT16	221	Placebo	>=250 mg/day	Yes	Yes	>=250 mg/day	No	Yes	Yes	Yes	Yes
3	3	160	mep	0	mg	160	160	100	100	18_003	18JAN17	18JAN2017	12APR17	12APR2017	221	18	Entered	55	Female	26OCT16	221	Placebo	>=250 mg/day	Yes	Yes	>=250 mg/day	No	Yes	Yes	Yes	Yes
4	4	160	mep	75	mg	85	92	92.39	92.39	18_003	18JAN17	18JAN2017	12APR17	12APR2017	221	18	Entered	55	Female	26OCT16	221	Placebo	>=250 mg/day	Yes	Yes	>=250 mg/day	No	Yes	Yes	Yes	Yes
1	1	160	AM	34	AM	126	126	100	100	19_001	28OCT16	28OCT2016	09DEC16	09DEC2016	225	19	Entered	53	Female	28OCT16	225	Placebo	<250 mg/day	No	No	>=250 mg/day	No	Yes	Yes	Yes	Yes
2	2	160	AM	37	AM	123	123	100	100	19_001	09DEC16	09DEC2016	19JAN17	19JAN2017	225	19	Entered	53	Female	28OCT16	225	Placebo	<250 mg/day	No	No	>=250 mg/day	No	Yes	Yes	Yes	Yes
3	3	160	AM	56	AM	104	104	100	100	19_001	19JAN17	19JAN2017	17APR17	17APR2017	225	19	Entered	53	Female	28OCT16	225	Placebo	<250 mg/day	No	No	>=250 mg/day	No	Yes	Yes	Yes	Yes
4	4	160	AM	0	AM	160	160	100	100	19_001	19JAN17	19JAN2017	17APR17	17APR2017	225	19	Entered	53	Female	28OCT16	225	Placebo	<250 mg/day	No	No	>=250 mg/day	No	Yes	Yes	Yes	Yes
1	1	160	AM	37	AM	123	123	100	100	19_002	27OCT16	27OCT2016	07DEC16	07DEC2016	224	19	Entered	37	Male	27OCT16	224	MF4637	<250 mg/day	No	No	<250 mg/day	No	Yes	Yes	Yes	Yes
2	2	160	AM	34	AM	126	126	100	100	19_002	07DEC16	07DEC2016	18JAN17	18JAN2017	224	19	Entered	37	Male	27OCT16	224	MF4637	<250 mg/day	No	No	<250 mg/day	No	Yes	Yes	Yes	Yes
3	3	160	AM	68	AM	92	92	100	100	19_002	18JAN17	18JAN2017	12APR17	12APR2017	224	19	Entered	37	Male	27OCT16	224	MF4637	<250 mg/day	No	No	<250 mg/day	No	Yes	Yes	Yes	Yes
4	4	160	AM	0	AM	160	160	100	100	19_002	18JAN17	18JAN2017	12APR17	12APR2017	224	19	Entered	37	Male	27OCT16	224	MF4637	<250 mg/day	No	No	<250 mg/day	No	Yes	Yes	Yes	Yes
1	1	160	AM	34	AM	126	126	100	100	19_004	04NOV16	04NOV2016	16DEC16	16DEC2016	226	19	Entered	53	Female	04NOV16	226	MF4637	<250 mg/day	No	No	>=250 mg/day	No	Yes	Yes	Yes	Yes
2	2	160	AM	34	AM	126	126	100	100	19_004	16DEC16	16DEC2016	27JAN17	27JAN2017	226	19	Entered	53	Female	04NOV16	226	MF4637	<250 mg/day	No	No	>=250 mg/day	No	Yes	Yes	Yes	Yes
3	3	160	AM	0	AM	160	160	100	100	19_004	27JAN17	27JAN2017	21APR17	21APR2017	226	19	Entered	53	Female	04NOV16	226	MF4637	<250 mg/day	No	No	>=250 mg/day	No	Yes	Yes	Yes	Yes
4	4	160	AM	68	AM	92	92	100	100	19_004	27JAN17	27JAN2017	21APR17	21APR2017	226	19	Entered	53	Female	04NOV16	226	MF4637	<250 mg/day	No	No	>=250 mg/day	No	Yes	Yes	Yes	Yes
1	1	160	AM	34	AM	126	126	100	100	19_005	04NOV16	04NOV2016	16DEC16	16DEC2016	227	19	Entered	51	Male	04NOV16	227	Placebo	<250 mg/day	No	No	<250 mg/day	No	Yes	Yes	Yes	Yes
2	2	160	AM	34	AM	126	126	100	100	19_005	16DEC16	16DEC2016	27JAN17	27JAN2017	227	19	Entered	51	Male	04NOV16	227	Placebo	<250 mg/day	No	No	<250 mg/day	No	Yes	Yes	Yes	Yes
3	3	160	AM	0	AM	160	160	100	100	19_005	27JAN17	27JAN2017	21APR17	21APR2017	227	19	Entered	51	Male	04NOV16	227	Placebo	<250 mg/day	No	No	<250 mg/day	No	Yes	Yes	Yes	Yes
4	4	160	AM	68	AM	92	92	100	100	19_005	27JAN17	27JAN2017	21APR17	21APR2017	227	19	Entered	51	Male	04NOV16	227	Placebo	<250 mg/day	No	No	<250 mg/day	No	Yes	Yes	Yes	Yes
1	1	160	AM	28	AM	132	132	100	100	19_007	21NOV16	21NOV2016	04JAN17	04JAN2017	289	19	Entered	50	Male	21NOV16	289	MF4637	<250 mg/day	No	No	>=250 mg/day	No	Yes	Yes	Yes	Yes
2	2	160	AM	40	AM	120	120	100	100	19_007	04JAN17	04JAN2017	13FEB17	13FEB2017	289	19	Entered	50	Male	21NOV16	289	MF4637	<250 mg/day	No	No	>=250 mg/day	No	Yes	Yes	Yes	Yes
3	3	160	AM	0	AM	160	160	100	100	19_007	13FEB17	13FEB2017	08MAY17	08MAY2017	289	19	Entered	50	Male	21NOV16	289	MF4637	<250 mg/day	No	No	>=250 mg/day	No	Yes	Yes	Yes	Yes
4	4	160	AM	68	AM	92	92	100	100	19_007	13FEB17	13FEB2017	08MAY17	08MAY2017	289	19	Entered	50	Male	21NOV16	289	MF4637	<250 mg/day	No	No	>=250 mg/day	No	Yes	Yes	Yes	Yes
1	1	160	AM	31	AM	129	129	100	100	19_009	21NOV16	21NOV2016	12DEC16	12DEC2016	290	19	Entered	49	Female	21NOV16	290	Placebo	<250 mg/day	No	No	>=250 mg/day	No	Yes	Yes	Yes	Yes
2	2	160	AM	37	AM	123	123	100	100	19_009	03JAN17	03JAN2017	13FEB17	13FEB2017	290	19	Entered	49	Female	21NOV16	290	Placebo	<250 mg/day	No	No	>=250 mg/day	No	Yes	Yes	Yes	Yes
3	3	160	AM	0	AM	160	160	100	100	19_009	13FEB17	13FEB2017	08MAY17	08MAY2017	290	19	Entered	49	Female	21NOV16	290	Placebo	<250 mg/day	No	No	>=250 mg/day	No	Yes	Yes	Yes	Yes
4	4	160	AM	68	AM	92	92	100	100	19_009	13FEB17	13FEB2017	08MAY17	08MAY2017	290	19	Entered	49	Female	21NOV16	290	Placebo	<250 mg/day	No	No	>=250 mg/day	No	Yes	Yes	Yes	Yes
1	1	160	AM	28	AM	132	132	100	100	19_010	21NOV16	21NOV2016	04JAN17	04JAN2017	221	19	Entered	33	Male	21NOV16	291	MF4637	<250 mg/day	No	No	>=250 mg/day	No	Yes	Yes	Yes	Yes
2	2	160	AM	120	AM	120	120	100	100	19_010	04JAN17	04JAN2017	13FEB17	13FEB2017	221	19	Entered	33	Male	21NOV16	291	MF4637	<250 mg/day	No	No	>=250 mg/day	No	Yes	Yes	Yes	Yes
3	3	160	AM	0	AM	160	160	100	100	19_010	13FEB17	13FEB2017	08MAY17	08MAY2017	221	19	Entered	33	Male	21NOV16	291	MF4637	<250 mg/day	No	No	>=250 mg/day	No	Yes	Yes	Yes	Yes
4	4	160	AM	0	AM	68	68	100	100	19_010	13FEB17	13FEB2017	08MAY17	08MAY2017	221	19	Entered	33	Male	21NOV16	291	MF4637	<250 mg/day	No	No	>=250 mg/day	No	Yes	Yes	Yes	Yes
1	1	160	AM	31	AM	129	129	100	100	19_012	21NOV16	21NOV2016	03JAN17	03JAN2017	288	19	Entered	55	Female	21NOV16	288	Placebo	<250 mg/day	Yes	No	>=250 mg/day	No	Yes	Yes	Yes	Yes
2	2	160	AM	37	AM	123	123	100	100	19_012	03JAN17	03JAN2017	13FEB17	13FEB2017	288	19	Entered	55	Female	21NOV16	288	Placebo	<250 mg/day	Yes	No	>=250 mg/day	No	Yes	Yes	Yes	Yes
3	3	160	AM	0	AM	160	160	100	100	19_012	13FEB17	13FEB2017	05MAY17	05MAY2017	288	19	Entered	55	Female	21NOV16	288	Placebo	<250 mg/day	Yes	No	>=250 mg/day	No	Yes	Yes	Yes	Yes
4	4	160	AM	77	AM	83	83	100	100	19_012	13FEB17	13FEB2017	05MAY17	05MAY2017	288	19	Entered	55	Female	21NOV16	288	Placebo	<250 mg/day	Yes	No	>=250 mg/day	No	Yes	Yes	Yes	Yes
