# Supplementary material for: Evaluation of a High Concentrate Omega-3 for Correcting the Omega-3 Fatty Acid Nutritional Deficiency in Non-alcoholic Fatty Liver Disease and effects on Hepatic Steatosis (CONDIN)
Source: Preprints.org preprint supplement (doi:10.20944/preprints201807.0240.v1), 2018-07-13
Supplement: Supplementary file 4 [file DM.xlsx]

## Sheet: DM
ICVER	ICCHVER	ICCHYN	ICREAD	SUBJID	ICDT	ICTM	CDIC	CTIC	BRTHDAT	RACEOTH	ALCNUM	ALCFREQ	ETHNIC	RACE	SMKYN	SMKQTDT	CDSMKQT	SITE	STATUS	AGE	SEX	FIRSTDT	RANDNO	TREAT	OMEGA	DIABETE	STATIN	OMEGA_C	SFFL	SAFETY	ITT	MITT	PP
Version 2	3	Yes	Yes	02_001	01OCT15	9:00:00	01OCT2015	9:00	07MAY58			Never	Not Hispanic or Latino	Caucasian	No			02	Entered	57	Female	27OCT15	108	MF4637	<250 mg/day	Yes	Yes	<250 mg/day	No	Yes	Yes	Yes	Yes
2	3	Yes	Yes	02_002	22OCT15	16:15:00	22OCT2015	16:15	26APR74			Never	Not Hispanic or Latino	Caucasian	Yes	01JAN07	01JAN2007	02	Entered	41	Male	06NOV15	109	MF4637	<250 mg/day	No	Yes	>=250 mg/day	No	Yes	Yes	Yes	Yes
2	3	Yes	Yes	02_003	23OCT15	9:20:00	23OCT2015	9:20	20APR57			Never	Not Hispanic or Latino	Caucasian	Yes	15APR02	15APR2002	02	Entered	58	Male	03NOV15	110	Placebo	>=250 mg/day	Yes	Yes	<250 mg/day	No	Yes	Yes	Yes	Yes
2	3	Yes	Yes	02_004	26OCT15	12:00:00	26OCT2015	12:00	30MAR55			Never	Not Hispanic or Latino	Caucasian	No			02	Early Termination	60	Female	12NOV15	111	Placebo	<250 mg/day	Yes	Yes	<250 mg/day	No	Yes	Yes	Yes	Yes
2	3	Yes	Yes	02_005	06NOV15	10:00:00	06NOV2015	10:00	10OCT50			Never	Not Hispanic or Latino	Caucasian	No			02	Entered	65	Male	04DEC15	112	Placebo	>=250 mg/day	No	No	>=250 mg/day	No	Yes	Yes	Yes	Yes
2		No	Yes	02_006	12NOV15	12:04:00	12NOV2015	12:04	28SEP76			Never	Not Hispanic or Latino	Caucasian	Yes	12JUN13	12JUN2013	02	Screen Failure	39	Female							<250 mg/day	Yes	No	No	No	No
2		No	Yes	03_001	16OCT15	9:00:00	16OCT2015	9:00	09DEC61		4	Daily	Not Hispanic or Latino	Caucasian	No			03	Early Termination	53	Male	19NOV15	117	MF4637	<250 mg/day	No	No	>=250 mg/day	No	Yes	Yes	No	No
2		No	Yes	03_002	19OCT15	12:30:00	19OCT2015	12:30	06JUL63	Hispanic		Never	Hispanic or Latino	Other	No			03	Early Termination	52	Female	30OCT15	116	Placebo	<250 mg/day	No	No	<250 mg/day	No	Yes	Yes	Yes	Yes
2	3	Yes	Yes	03_003	22OCT15	11:45:00	22OCT2015	11:45	25JAN90			Never	Not Hispanic or Latino	Caucasian	Yes	13AUG15	13AUG2015	03	Entered	25	Male	24NOV15	121	MF4637	<250 mg/day	No	No	<250 mg/day	No	Yes	Yes	Yes	Yes
2	3	Yes	Yes	03_004	26OCT15	7:00:00	26OCT2015	7:00	21FEB59		3	Weekly	Not Hispanic or Latino	Caucasian	No			03	Entered	56	Female	24NOV15	118	Placebo	<250 mg/day	No	No	>=250 mg/day	No	Yes	Yes	Yes	Yes
2		No	Yes	03_005	04NOV15	8:30:00	04NOV2015	8:30	02DEC65		1	Weekly	Not Hispanic or Latino	Caucasian	No			03	Early Termination	49	Female	25NOV15	119	MF4637	>=250 mg/day	No	No	<250 mg/day	No	Yes	Yes	Yes	Yes
2		No	Yes	03_006	05NOV15	9:00:00	05NOV2015	9:00	09AUG64		2	Daily	Not Hispanic or Latino	Caucasian	Yes			03	Screen Failure	51	Male							<250 mg/day	Yes	No	No	No	No
3	3	Yes	Yes	03_007	11NOV15	12:00:00	11NOV2015	12:00	16APR75			Never	Not Hispanic or Latino	Caucasian	Yes	09SEP12	09SEP2012	03	Entered	40	Male	19NOV15	120	Placebo	<250 mg/day	No	No	<250 mg/day	No	Yes	Yes	Yes	No
2		No	Yes	03_008	16NOV15	16:00:00	16NOV2015	16:00	29APR69		2	Weekly	Not Hispanic or Latino	Caucasian	No			03	Screen Failure	46	Male							>=250 mg/day	Yes	No	No	No	No
2	3	Yes	Yes	03_009	03DEC15	9:45:00	03DEC2015	9:45	25NOV75			Never	Hispanic or Latino	Caucasian	No			03	Entered	40	Male	13JAN16	122	MF4637	<250 mg/day	No	No	>=250 mg/day	No	Yes	Yes	Yes	Yes
2	3	Yes	Yes	03_010	03DEC15	10:15:00	03DEC2015	10:15	16DEC73			Never	Not Hispanic or Latino	Asian	Yes	06JUL12	06JUL2012	03	Entered	41	Male	12JAN16	123	Placebo	>=250 mg/day	No	No	>=250 mg/day	No	Yes	Yes	Yes	Yes
2	3	Yes	Yes	03_011	21DEC15	17:30:00	21DEC2015	17:30	20NOV60		2	Daily	Not Hispanic or Latino	Caucasian	No			03	Entered	55	Male	11FEB16	188	MF4637	<250 mg/day	No	Yes	<250 mg/day	No	Yes	Yes	Yes	Yes
2	3	Yes	Yes	03_012	27JAN16	9:20:00	27JAN2016	9:20	14DEC52		2	Weekly	Not Hispanic or Latino	Caucasian	No			03	Entered	63	Male	12FEB16	190	MF4637	<250 mg/day	No	Yes	<250 mg/day	No	Yes	Yes	Yes	Yes
2	3	Yes	Yes	03_013	01FEB16	10:00:00	01FEB2016	10:00	24DEC54			Never	Not Hispanic or Latino	Caucasian	No			03	Entered	61	Female	11FEB16	189	Placebo	<250 mg/day	No	Yes	<250 mg/day	No	Yes	Yes	Yes	Yes
1	3	Yes	Yes	04_001	06OCT15	9:50:00	06OCT2015	9:50	14SEP66			Never	Hispanic or Latino	Caucasian	No			04	Entered	49	Female	13OCT15	124	Placebo	>=250 mg/day	Yes	No	>=250 mg/day	No	Yes	Yes	Yes	Yes
1		No	Yes	04_002	07OCT15	10:35:00	07OCT2015	10:35	21AUG59			Never	Hispanic or Latino	Caucasian	Yes	01JAN12	01JAN2012	04	Screen Failure	56	Male							<250 mg/day	Yes	No	No	No	No
2		No	Yes	04_003	07OCT15	13:45:00	07OCT2015	13:45	13AUG80			Never	Not Hispanic or Latino	Caucasian	No			04	Screen Failure	35	Female							<250 mg/day	Yes	No	No	No	No
2		No	Yes	04_004	09OCT15	10:37:00	09OCT2015	10:37	28OCT80			Never	Not Hispanic or Latino	Caucasian	No			04	Entered	34	Male	15OCT15	125	MF4637	<250 mg/day	No	No	<250 mg/day	No	Yes	Yes	Yes	No
2		No	Yes	04_005	22OCT15	15:40:00	22OCT2015	15:40	08JUN75			Never	Hispanic or Latino	Caucasian	No			04	Screen Failure	40	Female							<250 mg/day	Yes	No	No	No	No
2		No	Yes	04_006	30OCT15	11:53:00	30OCT2015	11:53	10JUN61			Never	Hispanic or Latino	Caucasian	No			04	Screen Failure	54	Female							>=250 mg/day	Yes	No	No	No	No
2		No	Yes	04_007	03NOV15	12:43:00	03NOV2015	12:43	30APR56			Never	Not Hispanic or Latino	Black or African American	No			04	Screen Failure	59	Female							>=250 mg/day	Yes	No	No	No	No
2		No	Yes	04_008	04NOV15	9:41:00	04NOV2015	9:41	04SEP90			Never	Hispanic or Latino	Other	No			04	Screen Failure	25	Female							>=250 mg/day	Yes	No	No	No	No
2		No	Yes	04_009	28DEC15	12:21:00	28DEC2015	12:21	16FEB62			Never	Hispanic or Latino	Caucasian	No			04	Entered	53	Female	04JAN16	127	Placebo	<250 mg/day	No	No	<250 mg/day	No	Yes	Yes	Yes	Yes
2	3	Yes	Yes	04_010	29DEC15	9:41:00	29DEC2015	9:41	04SEP90			Never	Hispanic or Latino	Caucasian	No			04	Entered	25	Female	05JAN16	126	MF4637	>=250 mg/day	No	No	>=250 mg/day	No	Yes	Yes	Yes	Yes
2	3	Yes	Yes	04_011	29DEC15	14:12:00	29DEC2015	14:12	31AUG74			Never	Hispanic or Latino	Caucasian	No			04	Entered	41	Male	26JAN16	129	Placebo	>=250 mg/day	No	No	>=250 mg/day	No	Yes	Yes	Yes	Yes
2		No	Yes	04_012	11JAN16	15:16:00	11JAN2016	15:16	23AUG96			Never	Hispanic or Latino	Caucasian	No			04	Entered	19	Male	19JAN16	128	Placebo	<250 mg/day	No	No	<250 mg/day	No	Yes	Yes	Yes	Yes
2	3	Yes	Yes	04_013	08FEB16	9:10:00	08FEB2016	9:10	10SEP51			Never	Hispanic or Latino	Caucasian	No			04	Entered	64	Female	15FEB16	130	MF4637	<250 mg/day	No	Yes	<250 mg/day	No	Yes	Yes	Yes	Yes
2	3	Yes	Yes	04_014	15FEB16	12:00:00	15FEB2016	12:00	05SEP80			Never	Hispanic or Latino	Caucasian	Yes	01JUN15	01JUN2015	04	Entered	35	Female	25FEB16	131	MF4637	>=250 mg/day	No	No	>=250 mg/day	No	Yes	Yes	Yes	Yes
2	3	Yes	Yes	04_015	08MAR16	10:00:00	08MAR2016	10:00	03JUN65			Never	Not Hispanic or Latino	Black or African American	No			04	Entered	50	Male	21MAR16	198	Placebo	<250 mg/day	No	Yes	<250 mg/day	No	Yes	Yes	Yes	No
3		No	Yes	04_016	24MAR16	11:50:00	24MAR2016	11:50	06DEC65			Never	Not Hispanic or Latino	Caucasian	No			04	Screen Failure	50	Male								Yes	No	No	No	No
2		No	Yes	04_017	25MAR16	8:50:00	25MAR2016	8:50	20JUL66			Never	Hispanic or Latino	Caucasian	No			04	Screen Failure	49	Female								Yes	No	No	No	No
3	4	Yes	Yes	04_018	08JUL16	10:30:00	08JUL2016	10:30	07MAY79			Never	Hispanic or Latino	Caucasian	No			04	Early Termination	37	Male		197	MF4637	<250 mg/day	No	No	<250 mg/day	No	No	Yes	No	No
3	4	Yes	Yes	04_019	12JUL16	10:45:00	12JUL2016	10:45	09FEB66			Never	Hispanic or Latino	Caucasian	No			04	Early Termination	50	Female		200	Placebo	<250 mg/day	No	No	<250 mg/day	No	No	Yes	No	No
4		No	Yes	04_020	14JUL16	10:45:00	14JUL2016	10:45	20OCT71			Never	Hispanic or Latino	Black or African American	No			04	Entered	44	Male	28JUL16	196	MF4637	<250 mg/day	Yes	No	<250 mg/day	No	Yes	Yes	Yes	Yes
4		No	Yes	04_021	14JUL16	12:05:00	14JUL2016	12:05	06DEC65			Never	Not Hispanic or Latino	Caucasian	No			04	Screen Failure	50	Male							<250 mg/day	Yes	No	No	No	No
3	4	Yes	Yes	04_022	21JUL16	11:35:00	21JUL2016	11:35	12JAN72			Never	Hispanic or Latino	Caucasian	No			04	Entered	44	Female	28JUL16	199	Placebo	>=250 mg/day	No	No	>=250 mg/day	No	Yes	Yes	Yes	Yes
4		No	Yes	04_023	03AUG16	10:15:00	03AUG2016	10:15	06MAY60			Never	Not Hispanic or Latino	Black or African American	No			04	Entered	56	Male	17AUG16	202	MF4637	>=250 mg/day	No	No	>=250 mg/day	No	Yes	Yes	Yes	Yes
4		No	Yes	04_024	03AUG16	10:40:00	03AUG2016	10:40	03MAR61			Never	Hispanic or Latino	Caucasian	No			04	Screen Failure	55	Female							<250 mg/day	Yes	No	No	No	No
4		No	Yes	04_025	03AUG16	11:45:00	03AUG2016	11:45	13SEP66			Never	Hispanic or Latino	Caucasian	No			04	Entered	49	Male	25AUG16	203	MF4637	<250 mg/day	No	No	<250 mg/day	No	Yes	Yes	Yes	Yes
4		No	Yes	04_026	04AUG16	8:30:00	04AUG2016	8:30	22OCT79			Never	Hispanic or Latino	Caucasian	No			04	Screen Failure	36	Male							>=250 mg/day	Yes	No	No	No	No
4		No	Yes	04_027	04AUG16	9:30:00	04AUG2016	9:30	01JAN77			Never	Hispanic or Latino	Caucasian	No			04	Early Termination	39	Female		201	Placebo	>=250 mg/day	No	No	>=250 mg/day	No	No	Yes	No	No
4		No	Yes	04_028	08AUG16	11:25:00	08AUG2016	11:25	11AUG73			Never	Hispanic or Latino	Caucasian	No			04	Screen Failure	42	Male								Yes	No	No	No	No
4		No	Yes	04_029	11AUG16	13:30:00	11AUG2016	13:30	29JUN49			Never	Hispanic or Latino	Caucasian	Yes	01JAN13	01JAN2013	04	Screen Failure	67	Female								Yes	No	No	No	No
4		No	Yes	04_030	23AUG16	12:45:00	23AUG2016	12:45	29JUN49			Never	Hispanic or Latino	Caucasian	Yes	01JAN94	01JAN1994	04	Entered	67	Female	15SEP16	216	MF4637	>=250 mg/day	Yes	No	>=250 mg/day	No	Yes	Yes	Yes	Yes
4		No	Yes	04_031	27AUG16	8:25:00	27AUG2016	8:25	07OCT59			Never	Hispanic or Latino	Caucasian	No			04	Entered	56	Male	22SEP16	217	Placebo	<250 mg/day	Yes	No	<250 mg/day	No	Yes	Yes	Yes	Yes
4		No	Yes	04_032	31AUG16	9:00:00	31AUG2016	9:00	16JUN63			Never	Hispanic or Latino	Caucasian	No			04	Early Termination	53	Female	22SEP16	218	MF4637	<250 mg/day	No	No	<250 mg/day	No	Yes	Yes	No	No
4		No	Yes	04_033	19SEP16	8:45:00	19SEP2016	8:45	07JAN74			Never	Hispanic or Latino	Caucasian	No			04	Screen Failure	42	Female								Yes	No	No	No	No
4		No	Yes	04_034	19SEP16	8:50:00	19SEP2016	8:50	08NOV63			Never	Hispanic or Latino	Black or African American	No			04	Screen Failure	52	Male								Yes	No	No	No	No
4		No	Yes	04_035	21SEP16	11:25:00	21SEP2016	11:25	07SEP57			Never	Not Hispanic or Latino	Caucasian	No			04	Entered	59	Female	10OCT16	219	Placebo	>=250 mg/day	No	No	>=250 mg/day	No	Yes	Yes	Yes	Yes
2		No	Yes	09_001	24NOV15	15:30:00	24NOV2015	15:30	03SEP70			Never	Hispanic or Latino	Caucasian	No			09	Screen Failure	45	Male							>=250 mg/day	Yes	No	No	No	No
2		No	Yes	09_002	03DEC15	10:15:00	03DEC2015	10:15	13JUN67			Never	Hispanic or Latino	Caucasian	No			09	Screen Failure	48	Male							<250 mg/day	Yes	No	No	No	No
2		No	Yes	09_003	10DEC15	10:00:00	10DEC2015	10:00	23AUG62			Weekly	Hispanic or Latino	Other	No			09	Screen Failure	53	Male							<250 mg/day	Yes	No	No	No	No
2		No	Yes	09_004	19JAN16	10:20:00	19JAN2016	10:20	13JUN67		1	Weekly	Hispanic or Latino	Caucasian	No			09	Entered	48	Male	05FEB16	164	Placebo	>=250 mg/day	Yes	Yes	<250 mg/day	No	Yes	Yes	Yes	Yes
2		No	Yes	09_005	19JAN16	10:00:00	19JAN2016	10:00	23AUG62	SPANISH		Never	Hispanic or Latino	Other	No			09	Entered	53	Male	05FEB16	166	MF4637	>=250 mg/day	Yes	Yes	<250 mg/day	No	Yes	Yes	Yes	Yes
2		No	Yes	09_006	05FEB16	9:00:00	05FEB2016	9:00	22OCT43			Never	Hispanic or Latino	Caucasian	No			09	Screen Failure	72	Male							<250 mg/day	Yes	No	No	No	No
2		No	Yes	09_007	05FEB16	10:00:00	05FEB2016	10:00	02JAN67			Never	Hispanic or Latino	Caucasian	No			09	Screen Failure	49	Female							>=250 mg/day	Yes	No	No	No	No
2		No	Yes	09_008	05FEB16	10:30:00	05FEB2016	10:30	30JUN66			Never	Hispanic or Latino	Caucasian	No			09	Entered	49	Male	04MAR16	165	Placebo	<250 mg/day	No	No	<250 mg/day	No	Yes	Yes	Yes	Yes
2		No	Yes	09_009	08FEB16	10:00:00	08FEB2016	10:00	12JUL42			Never	Hispanic or Latino	Caucasian	Yes	05JAN15	05JAN2015	09	Screen Failure	73	Female							>=250 mg/day	Yes	No	No	No	No
2		No	Yes	09_010	04MAR16	8:30:00	04MAR2016	8:30	15AUG42			Never	Hispanic or Latino	Caucasian	Yes	29FEB00	29FEB2000	09	Screen Failure	73	Female							>=250 mg/day	Yes	No	No	No	No
2		No	Yes	09_011	04MAR16	10:00:00	04MAR2016	10:00	06MAY47			Never	Hispanic or Latino	Caucasian	Yes	06MAR13	06MAR2013	09	Screen Failure	68	Female							<250 mg/day	Yes	No	No	No	No
2		No	Yes	09_012	10MAR16	9:00:00	10MAR2016	9:00	02OCT42			Never	Hispanic or Latino	Caucasian	No			09	Screen Failure	73	Male							<250 mg/day	Yes	No	No	No	No
3		No	Yes	09_013	18MAR16	10:00:00	18MAR2016	10:00	03JUN58			Never	Hispanic or Latino	Black or African American	No			09	Screen Failure	57	Female							<250 mg/day	Yes	No	No	No	No
		No	No	09_014														09	Screen Failure										Yes	No	No	No	No
4	2	Yes	Yes	09_015	05AUG16	10:20:00	05AUG2016	10:20	10OCT43			Never	Hispanic or Latino	Caucasian	No			09	Entered	72	Male	04OCT16	167	MF4637	>=250 mg/day	Yes	No	<250 mg/day	No	Yes	Yes	Yes	Yes
4	2	Yes	Yes	09_016	05AUG16	10:00:00	05AUG2016	10:00	12JUL42			Never	Hispanic or Latino	Caucasian	No			09	Screen Failure	74	Female							<250 mg/day	Yes	No	No	No	No
4	2	Yes	Yes	09_017	05AUG16	9:55:00	05AUG2016	9:55	06MAY47			Never	Hispanic or Latino	Caucasian	No			09	Screen Failure	69	Female							<250 mg/day	Yes	No	No	No	No
4	2	Yes	Yes	09_018	05AUG16	11:15:00	05AUG2016	11:15	02OCT42			Never	Hispanic or Latino	Caucasian	No			09	Entered	73	Male	14NOV16	105	Placebo	>=250 mg/day	Yes	No	>=250 mg/day	No	Yes	Yes	Yes	Yes
4	2	Yes	Yes	09_019	16AUG16	9:00:00	16AUG2016	9:00	15AUG42			Never	Hispanic or Latino	Caucasian	No			09	Screen Failure	74	Female							<250 mg/day	Yes	No	No	No	No
4		No	Yes	09_020	31AUG16	7:30:00	31AUG2016	7:30	11FEB63			Never	Hispanic or Latino	Caucasian	Yes	25JAN95	25JAN1995	09	Entered	53	Female	14OCT16	169	MF4637	>=250 mg/day	Yes	No	<250 mg/day	No	Yes	Yes	Yes	Yes
4		No	Yes	09_021	31AUG16	7:45:00	31AUG2016	7:45	12OCT61			Never	Hispanic or Latino	Black or African American	Yes	15JUN10	15JUN2010	09	Entered	54	Male	27OCT16	104	MF4637	>=250 mg/day	No	No	<250 mg/day	No	Yes	Yes	Yes	Yes
4		No	Yes	09_022	31AUG16	8:00:00	31AUG2016	8:00	16APR61			Never	Hispanic or Latino	Caucasian	Yes	15JUN11	15JUN2011	09	Screen Failure	55	Male							<250 mg/day	Yes	No	No	No	No
4		No	Yes	09_023	31AUG16	8:17:00	31AUG2016	8:17	13JAN48			Never	Hispanic or Latino	Caucasian	No			09	Screen Failure	68	Female							<250 mg/day	Yes	No	No	No	No
4		No	Yes	09_024	19SEP16	8:25:00	19SEP2016	8:25	04AUG69			Never	Hispanic or Latino	Caucasian	Yes	01APR00	01APR2000	09	Entered	47	Male	04OCT16	168	Placebo	>=250 mg/day	Yes	No	<250 mg/day	No	Yes	Yes	Yes	No
4		No	Yes	09_025	27OCT16	7:30:00	27OCT2016	7:30	11FEB46			Never	Hispanic or Latino	Caucasian	No			09	Screen Failure	70	Female							<250 mg/day	Yes	No	No	No	No
4		No	Yes	09_026	11NOV16	8:50:00	11NOV2016	8:50	19DEC60			Never	Hispanic or Latino	Caucasian	No			09	Entered	55	Female	12DEC16	171	Placebo	>=250 mg/day	No	No	<250 mg/day	No	Yes	Yes	Yes	Yes
4		No	Yes	09_027	11NOV16	9:00:00	11NOV2016	9:00	25JAN56			Never	Hispanic or Latino	Caucasian	Yes	01DEC04	01DEC2004	09	Early Termination	60	Female	12DEC16	107	Placebo	>=250 mg/day	Yes	No	<250 mg/day	No	Yes	Yes	No	No
4		No	Yes	09_028	11NOV16	9:00:00	11NOV2016	9:00	24JUL72			Never	Hispanic or Latino	Black or African American	No			09	Screen Failure	44	Female							<250 mg/day	Yes	No	No	No	No
4		No	Yes	09_029	11NOV16	9:00:00	11NOV2016	9:00	01FEB53			Never	Hispanic or Latino	Caucasian	No			09	Early Termination	63	Female	12DEC16	106	MF4637	>=250 mg/day	Yes	No	<250 mg/day	No	Yes	Yes	No	No
4		No	Yes	09_030	14NOV16	9:00:00	14NOV2016	9:00	19NOV56			Never	Hispanic or Latino	Caucasian	No			09	Entered	59	Female	12DEC16	170	MF4637	>=250 mg/day	No	No	<250 mg/day	No	Yes	Yes	Yes	Yes
2		No	Yes	10_001	20OCT15	15:35:00	20OCT2015	15:35	21DEC83		1	Weekly	Not Hispanic or Latino	Caucasian	No			10	Screen Failure	31	Male							>=250 mg/day	Yes	No	No	No	No
2		No	Yes	10_002	27OCT15	8:30:00	27OCT2015	8:30	14JAN82		1	Weekly	Not Hispanic or Latino	Caucasian	No			10	Screen Failure	33	Male							<250 mg/day	Yes	No	No	No	No
2		No	Yes	10_003	27OCT15	13:50:00	27OCT2015	13:50	10MAR61		1	Weekly	Not Hispanic or Latino	Caucasian	No			10	Screen Failure	54	Female							<250 mg/day	Yes	No	No	No	No
2		Yes	Yes	10_004	19JAN16	9:40:00	19JAN2016	9:40	17DEC68		1	Weekly	Not Hispanic or Latino	Caucasian	No			10	Entered	47	Male	01FEB16	172	MF4637	>=250 mg/day	No	No	>=250 mg/day	No	Yes	Yes	Yes	Yes
2		No	Yes	10_005	19JAN16	13:20:00	19JAN2016	13:20	07SEP78			Never	Not Hispanic or Latino	Caucasian	Yes		JAN2015	10	Screen Failure	37	Female								Yes	No	No	No	No
2		Yes	Yes	10_006	12FEB16	10:40:00	12FEB2016	10:40	11JUN60		1	Weekly	Not Hispanic or Latino	Caucasian	No			10	Entered	55	Male	25FEB16	174	Placebo	<250 mg/day	No	No	<250 mg/day	No	Yes	Yes	Yes	Yes
2		Yes	Yes	10_007	16FEB16	12:03:00	16FEB2016	12:03	10MAR61		1	Weekly	Not Hispanic or Latino	Caucasian	Yes		2000	10	Entered	54	Female	01MAR16	173	MF4637	<250 mg/day	No	Yes	<250 mg/day	No	Yes	Yes	Yes	Yes
3		No	Yes	10_008	19APR16	17:05:00	19APR2016	17:05	26DEC51		1	Weekly	Not Hispanic or Latino	Caucasian	No			10	Screen Failure	64	Female								Yes	No	No	No	No
3	4	Yes	Yes	10_009	15JUN16	16:20:00	15JUN2016	16:20	26DEC51		1	Weekly	Not Hispanic or Latino	Caucasian	No			10	Entered	64	Female	27JUN16	176	MF4637	<250 mg/day	No	No	<250 mg/day	No	Yes	Yes	Yes	Yes
4		No	Yes	10_010	30AUG16	9:53:00	30AUG2016	9:53	14SEP81			Never	Not Hispanic or Latino	Black or African American	No			10	Entered	34	Male	27SEP16	175	Placebo	>=250 mg/day	No	No	>=250 mg/day	No	Yes	Yes	Yes	Yes
4		No	Yes	10_011	15SEP16	10:25:00	15SEP2016	10:25	07JUL66		7	Weekly	Not Hispanic or Latino	Caucasian	Yes		2012	10	Screen Failure	50	Male								Yes	No	No	No	No
4		No	Yes	10_012	29SEP16	12:20:00	29SEP2016	12:20	21FEB63		1	Weekly	Not Hispanic or Latino	Caucasian	No			10	Entered	53	Male	12OCT16	177	Placebo	<250 mg/day	No	Yes	<250 mg/day	No	Yes	Yes	Yes	Yes
4		No	Yes	10_013	31OCT16	14:55:00	31OCT2016	14:55	15FEB50			Never	Not Hispanic or Latino	Caucasian	Yes		1985	10	Screen Failure	66	Female								Yes	No	No	No	No
4		No	Yes	11_001	04AUG16	10:13:00	04AUG2016	10:13	13SEP45	Middle Eastern		Never	Not Hispanic or Latino	Other	No			11	Screen Failure	70	Female								Yes	No	No	No	No
4		No	Yes	11_002	05AUG16	10:05:00	05AUG2016	10:05	01APR53			Never	Not Hispanic or Latino	Caucasian	Yes		APR2003	11	Screen Failure	63	Female								Yes	No	No	No	No
4		No	Yes	11_003	11AUG16	12:16:00	11AUG2016	12:16	26JUN64		3	Weekly	Hispanic or Latino	Caucasian	No			11	Early Termination	52	Male	15SEP16	142	Placebo	<250 mg/day	Yes	Yes	>=250 mg/day	No	Yes	Yes	Yes	Yes
4		No	Yes	11_004	12AUG16	9:20:00	12AUG2016	9:20	11JUN74			Never	Not Hispanic or Latino	Black or African American	No			11	Entered	42	Female	02SEP16	140	MF4637	<250 mg/day	Yes	No	<250 mg/day	No	Yes	Yes	Yes	Yes
4		No	Yes	11_005	18AUG16	10:07:00	18AUG2016	10:07	07SEP52			Never	Not Hispanic or Latino	Caucasian	No			11	Early Termination	63	Male	26SEP16	141	MF4637	>=250 mg/day	No	No	>=250 mg/day	No	Yes	Yes	No	No
4		No	Yes	11_006	06SEP16	14:51:00	06SEP2016	14:51	21MAR62	MULTIRACIAL		Never	Hispanic or Latino	Other	No			11	Entered	54	Female	29SEP16	146	Placebo	<250 mg/day	Yes	No	>=250 mg/day	No	Yes	Yes	Yes	Yes
4		No	Yes	11_007	12SEP16	8:52:00	12SEP2016	8:52	22APR68		0	Weekly	Not Hispanic or Latino	Caucasian	No			11	Screen Failure	48	Female							>=250 mg/day	Yes	No	No	No	No
4		No	Yes	11_008	14SEP16	11:36:00	14SEP2016	11:36	21DEC73		1	Daily	Not Hispanic or Latino	Native Hawaiian or Other Pacific Islander	Yes		JUN2016	11	Entered	42	Male	27SEP16	144	MF4637	<250 mg/day	No	No	>=250 mg/day	No	Yes	Yes	Yes	Yes
4		No	Yes	11_009	14SEP16	12:10:00	14SEP2016	12:10	16AUG66			Never	Not Hispanic or Latino	Black or African American	No			11	Entered	50	Female	01OCT16	147	Placebo	<250 mg/day	No	No	<250 mg/day	No	Yes	Yes	Yes	Yes
4		No	Yes	11_010	15SEP16	9:58:00	15SEP2016	9:58	30MAR64			Never	Not Hispanic or Latino	Caucasian	No			11	Entered	52	Female	27SEP16	143	Placebo	<250 mg/day	No	Yes	<250 mg/day	No	Yes	Yes	Yes	Yes
4		No	Yes	11_011	19SEP16	10:15:00	19SEP2016	10:15	30SEP74			Never	Not Hispanic or Latino	Caucasian	Yes		2002	11	Entered	41	Female	19OCT16	244	Placebo	<250 mg/day	No	No	>=250 mg/day	No	Yes	Yes	Yes	Yes
4		No	Yes	11_012	21SEP16	10:24:00	21SEP2016	10:24	06MAY76			Never	Not Hispanic or Latino	Black or African American	No			11	Entered	40	Female	18OCT16	145	MF4637	<250 mg/day	No	No	<250 mg/day	No	Yes	Yes	Yes	Yes
4		No	Yes	11_013	29SEP16	15:41:00	29SEP2016	15:41	01NOV86	MULTIRACIAL		Never	Hispanic or Latino	Other	No			11	Screen Failure	29	Female								Yes	No	No	No	No
4		No	Yes	11_014	01NOV16	11:20:00	01NOV2016	11:20	01OCT67			Never	Not Hispanic or Latino	Caucasian	Yes		JUN2016	11	Entered	49	Female	17NOV16	247	Placebo	>=250 mg/day	No	No	>=250 mg/day	No	Yes	Yes	Yes	No
4		No	Yes	11_015	02NOV16	9:45:00	02NOV2016	9:45	12OCT54	MULTI RACIAL		Never	Hispanic or Latino	Other	Yes		2000	11	Entered	62	Male	10NOV16	245	MF4637	<250 mg/day	No	No	>=250 mg/day	No	Yes	Yes	Yes	Yes
4		No	Yes	11_016	08NOV16	8:46:00	08NOV2016	8:46	20JUN61			Never	Not Hispanic or Latino	Caucasian	No			11	Screen Failure	55	Female							>=250 mg/day	Yes	No	No	No	No
4		No	Yes	11_017	08NOV16	11:32:00	08NOV2016	11:32	22MAR84			Never	Hispanic or Latino	Caucasian	No			11	Entered	32	Female	28NOV16	246	MF4637	<250 mg/day	No	No	<250 mg/day	No	Yes	Yes	Yes	Yes
4		No	Yes	11_018	16NOV16	11:24:00	16NOV2016	11:24	09APR71			Never	Not Hispanic or Latino	Caucasian	No			11	Entered	45	Female	29NOV16	248	Placebo	<250 mg/day	No	No	>=250 mg/day	No	Yes	Yes	Yes	Yes
4		No	Yes	12_001	09SEP16	9:00:00	09SEP2016	9:00	13OCT49		1	Weekly	Hispanic or Latino	Caucasian	Yes		2013	12	Entered	66	Male	14OCT16	257	MF4637	>=250 mg/day	Yes	Yes	>=250 mg/day	No	Yes	Yes	Yes	Yes
4		No	Yes	12_002	13SEP16	9:25:00	13SEP2016	9:25	17DEC44			Never	Hispanic or Latino	Caucasian	Yes		1987	12	Screen Failure	71	Male								Yes	No	No	No	No
4		No	Yes	12_003	13SEP16	11:03:00	13SEP2016	11:03	13OCT63			Never	Hispanic or Latino	Caucasian	No			12	Entered	52	Male	11OCT16	138	Placebo	>=250 mg/day	Yes	No	>=250 mg/day	No	Yes	Yes	Yes	Yes
4		No	Yes	12_004	15SEP16	9:18:00	15SEP2016	9:18	11JUN46			Never	Hispanic or Latino	Caucasian	No			12	Entered	70	Male	22SEP16	133	Placebo	>=250 mg/day	Yes	Yes	>=250 mg/day	No	Yes	Yes	Yes	Yes
4		No	Yes	12_005	15SEP16	10:03:00	15SEP2016	10:03	24FEB44			Never	Hispanic or Latino	Black or African American	No			12	Screen Failure	72	Female								Yes	No	No	No	No
4		No	Yes	12_006	15SEP16	11:00:00	15SEP2016	11:00	14DEC39			Never	Hispanic or Latino	Caucasian	No			12	Entered	76	Female	22SEP16	132	MF4637	<250 mg/day	Yes	Yes	<250 mg/day	No	Yes	Yes	Yes	Yes
4		No	Yes	12_007	16SEP16	9:30:00	16SEP2016	9:30	05SEP52			Never	Hispanic or Latino	Caucasian	No			12	Entered	64	Female	30SEP16	134	Placebo	>=250 mg/day	No	Yes	>=250 mg/day	No	Yes	Yes	Yes	Yes
4		No	Yes	12_008	16SEP16	10:03:00	16SEP2016	10:03	15OCT47			Never	Hispanic or Latino	Caucasian	Yes		2014	12	Screen Failure	68	Female								Yes	No	No	No	No
4		No	Yes	12_009	19SEP16	11:45:00	19SEP2016	11:45	04FEB63			Never	Hispanic or Latino	Caucasian	No			12	Early Termination	53	Female	26OCT16	260	MF4637	>=250 mg/day	Yes	Yes	>=250 mg/day	No	Yes	Yes	Yes	Yes
4		No	Yes	12_010	20SEP16	9:15:00	20SEP2016	9:15	19SEP44			Never	Hispanic or Latino	Caucasian	Yes		2004	12	Screen Failure	72	Male								Yes	No	No	No	No
4		No	Yes	12_011	20SEP16	11:40:00	20SEP2016	11:40	30DEC38			Never	Hispanic or Latino	Caucasian	Yes	18JUN94	18JUN1994	12	Screen Failure	77	Male								Yes	No	No	No	No
4		No	Yes	12_012	21SEP16	8:30:00	21SEP2016	8:30	30DEC64			Never	Hispanic or Latino	Caucasian	Yes		2014	12	Screen Failure	51	Female								Yes	No	No	No	No
4		No	Yes	12_013	21SEP16	10:15:00	21SEP2016	10:15	14OCT63			Never	Hispanic or Latino	Caucasian	No			12	Entered	52	Female	30SEP16	137	MF4637	>=250 mg/day	No	Yes	>=250 mg/day	No	Yes	Yes	Yes	Yes
4		No	Yes	12_014	26SEP16	8:45:00	26SEP2016	8:45	02MAY50			Never	Hispanic or Latino	Caucasian	No			12	Entered	66	Female	30SEP16	136	Placebo	>=250 mg/day	Yes	Yes	>=250 mg/day	No	Yes	Yes	Yes	Yes
4		No	Yes	12_015	26SEP16	9:00:00	26SEP2016	9:00	21JAN69			Never	Hispanic or Latino	Caucasian	No			12	Early Termination	47	Female	30SEP16	135	MF4637	>=250 mg/day	Yes	Yes	>=250 mg/day	No	Yes	Yes	Yes	Yes
4		No	Yes	12_016	26SEP16	11:05:00	26SEP2016	11:05	03OCT63			Never	Hispanic or Latino	Caucasian	Yes		2014	12	Entered	52	Female	05OCT16	103	MF4637	<250 mg/day	No	No	<250 mg/day	No	Yes	Yes	Yes	Yes
4		No	Yes	12_017	27SEP16	9:00:00	27SEP2016	9:00	18FEB59			Never	Hispanic or Latino	Caucasian	No			12	Entered	57	Female	05OCT16	100	Placebo	>=250 mg/day	Yes	Yes	>=250 mg/day	No	Yes	Yes	Yes	Yes
4		No	Yes	12_018	27SEP16	10:45:00	27SEP2016	10:45	23JUL39			Never	Hispanic or Latino	Black or African American	No			12	Screen Failure	77	Female								Yes	No	No	No	No
4		No	Yes	12_019	28SEP16	10:20:00	28SEP2016	10:20	12JAN63			Never	Hispanic or Latino	Caucasian	Yes		2014	12	Entered	53	Male	05OCT16	102	Placebo	<250 mg/day	Yes	Yes	<250 mg/day	No	Yes	Yes	Yes	Yes
4		No	Yes	12_020	29SEP16	9:23:00	29SEP2016	9:23	08OCT55			Never	Hispanic or Latino	Caucasian	No			12	Entered	60	Female	05OCT16	101	MF4637	>=250 mg/day	Yes	Yes	>=250 mg/day	No	Yes	Yes	Yes	Yes
4		No	Yes	12_021	29SEP16	11:40:00	29SEP2016	11:40	23MAR62			Never	Hispanic or Latino	Caucasian	Yes		1998	12	Entered	54	Male	11OCT16	254	MF4637	>=250 mg/day	Yes	Yes	>=250 mg/day	No	Yes	Yes	Yes	Yes
4		No	Yes	12_022	03OCT16	9:00:00	03OCT2016	9:00	26NOV72			Never	Hispanic or Latino	Caucasian	Yes		1991	12	Entered	43	Male	12OCT16	253	Placebo	<250 mg/day	Yes	No	<250 mg/day	No	Yes	Yes	Yes	Yes
4		No	Yes	12_023	03OCT16	9:30:00	03OCT2016	9:30	15OCT71			Never	Hispanic or Latino	Caucasian	Yes		2015	12	Screen Failure	44	Female								Yes	No	No	No	No
4		No	Yes	12_024	03OCT16	9:45:00	03OCT2016	9:45	07SEP75			Never	Hispanic or Latino	Caucasian	No			12	Early Termination	41	Female	11OCT16	139	MF4637	>=250 mg/day	Yes	No	>=250 mg/day	No	Yes	Yes	Yes	Yes
4		No	Yes	12_025	03OCT16	10:10:00	03OCT2016	10:10	07FEB43	multiracial		Never	Hispanic or Latino	Other	No			12	Entered	73	Male	14OCT16	258	MF4637	>=250 mg/day	Yes	No	>=250 mg/day	No	Yes	Yes	Yes	Yes
4		No	Yes	12_026	04OCT16	8:30:00	04OCT2016	8:30	24SEP54			Never	Hispanic or Latino	Caucasian	No			12	Screen Failure	62	Male								Yes	No	No	No	No
4		No	Yes	12_027	04OCT16	8:50:00	04OCT2016	8:50	11FEB60			Never	Hispanic or Latino	Caucasian	No			12	Entered	56	Female	12OCT16	252	Placebo	<250 mg/day	No	Yes	<250 mg/day	No	Yes	Yes	Yes	Yes
4		No	Yes	12_028	04OCT16	9:15:00	04OCT2016	9:15	04FEB45			Never	Hispanic or Latino	Caucasian	Yes		1985	12	Entered	71	Female	14OCT16	259	Placebo	<250 mg/day	Yes	Yes	<250 mg/day	No	Yes	Yes	Yes	Yes
4		No	Yes	12_029	05OCT16	9:08:00	05OCT2016	9:08	16NOV43			Never	Hispanic or Latino	Caucasian	No			12	Entered	72	Male	12OCT16	256	Placebo	>=250 mg/day	Yes	Yes	>=250 mg/day	No	Yes	Yes	Yes	Yes
4		No	Yes	12_030	05OCT16	9:20:00	05OCT2016	9:20	12AUG60			Never	Hispanic or Latino	Caucasian	Yes		2012	12	Entered	56	Male	12OCT16	255	MF4637	<250 mg/day	Yes	Yes	<250 mg/day	No	Yes	Yes	Yes	Yes
4		No	Yes	12_031	05OCT16	9:25:00	05OCT2016	9:25	27OCT61			Never	Not Hispanic or Latino	Black or African American	Yes		2012	12	Screen Failure	54	Female								Yes	No	No	No	No
4		No	Yes	12_032	05OCT16	10:55:00	05OCT2016	10:55	05OCT49			Never	Hispanic or Latino	Caucasian	No			12	Entered	67	Male	02NOV16	280	Placebo	>=250 mg/day	Yes	No	>=250 mg/day	No	Yes	Yes	Yes	Yes
4		No	Yes	12_033	10OCT16	9:00:00	10OCT2016	9:00	30MAR44			Never	Hispanic or Latino	Caucasian	No			12	Entered	72	Female	02NOV16	282	MF4637	>=250 mg/day	Yes	No	>=250 mg/day	No	Yes	Yes	Yes	Yes
4		No	Yes	12_034	10OCT16	9:00:00	10OCT2016	9:00	08APR61			Never	Hispanic or Latino	Caucasian	Yes		1991	12	Entered	55	Female	26OCT16	261	Placebo	>=250 mg/day	Yes	No	>=250 mg/day	No	Yes	Yes	Yes	No
4		No	Yes	12_035	11OCT16	8:30:00	11OCT2016	8:30	24JAN64			Never	Hispanic or Latino	Caucasian	No			12	Screen Failure	52	Female								Yes	No	No	No	No
4		No	Yes	12_036	11OCT16	8:40:00	11OCT2016	8:40	20SEP65			Never	Hispanic or Latino	Caucasian	No			12	Screen Failure	51	Male								Yes	No	No	No	No
4		No	Yes	12_037	11OCT16	10:45:00	11OCT2016	10:45	15JUL70			Never	Hispanic or Latino	Caucasian	No			12	Screen Failure	46	Female								Yes	No	No	No	No
4		No	Yes	12_038	12OCT16	8:20:00	12OCT2016	8:20	17MAY54			Never	Hispanic or Latino	Black or African American	Yes		2013	12	Entered	62	Male	26OCT16	263	Placebo	>=250 mg/day	Yes	Yes	>=250 mg/day	No	Yes	Yes	Yes	Yes
4		No	Yes	12_039	12OCT16	12:00:00	12OCT2016	12:00	16JUN59		2	Weekly	Hispanic or Latino	Caucasian	Yes		1988	12	Entered	57	Male	26OCT16	262	MF4637	<250 mg/day	No	No	<250 mg/day	No	Yes	Yes	Yes	Yes
4		No	Yes	12_040	12OCT16	12:30:00	12OCT2016	12:30	15NOV55			Never	Hispanic or Latino	Caucasian	Yes		2015	12	Entered	60	Female	10NOV16	292	MF4637	>=250 mg/day	Yes	Yes	>=250 mg/day	No	Yes	Yes	Yes	Yes
4		No	Yes	12_041	13OCT16	9:01:00	13OCT2016	9:01	17OCT61			Never	Hispanic or Latino	Caucasian	Yes		1998	12	Early Termination	54	Female	10NOV16	293	Placebo	>=250 mg/day	Yes	Yes	>=250 mg/day	No	Yes	Yes	Yes	Yes
4		No	Yes	12_042	13OCT16	10:02:00	13OCT2016	10:02	05JUL54			Never	Hispanic or Latino	Caucasian	Yes		1981	12	Screen Failure	62	Male								Yes	No	No	No	No
4		No	Yes	12_043	13OCT16	11:33:00	13OCT2016	11:33	20MAY39			Never	Hispanic or Latino	Caucasian	Yes		2012	12	Entered	77	Male	03NOV16	283	MF4637	>=250 mg/day	Yes	Yes	>=250 mg/day	No	Yes	Yes	Yes	Yes
4		No	Yes	12_044	14OCT16	12:07:00	14OCT2016	12:07	15MAY50			Never	Hispanic or Latino	Caucasian	No			12	Entered	66	Male	02NOV16	281	Placebo	>=250 mg/day	Yes	Yes	>=250 mg/day	No	Yes	Yes	Yes	Yes
4		No	Yes	12_045	17OCT16	8:25:00	17OCT2016	8:25	25MAR51			Never	Hispanic or Latino	Black or African American	Yes		2007	12	Screen Failure	65	Female								Yes	No	No	No	No
4		No	Yes	12_046	18OCT16	8:45:00	18OCT2016	8:45	19JAN41			Never	Hispanic or Latino	Black or African American	No			12	Entered	75	Male	03NOV16	284	MF4637	>=250 mg/day	Yes	Yes	>=250 mg/day	No	Yes	Yes	Yes	Yes
4		No	Yes	12_047	18OCT16	9:40:00	18OCT2016	9:40	05MAY70			Never	Hispanic or Latino	Caucasian	No			12	Screen Failure	46	Male							<250 mg/day	Yes	No	No	No	No
4		No	Yes	12_048	18OCT16	10:45:00	18OCT2016	10:45	15SEP53			Never	Hispanic or Latino	Caucasian	No			12	Entered	63	Female	03NOV16	285	MF4637	<250 mg/day	Yes	No	<250 mg/day	No	Yes	Yes	Yes	Yes
4		No	Yes	12_049	20OCT16	7:50:00	20OCT2016	7:50	02DEC66			Never	Hispanic or Latino	Caucasian	No			12	Screen Failure	49	Male								Yes	No	No	No	No
4		No	Yes	12_050	20OCT16	9:10:00	20OCT2016	9:10	01MAY47			Never	Hispanic or Latino	Caucasian	Yes		2014	12	Screen Failure	69	Female								Yes	No	No	No	No
4		No	Yes	12_051	20OCT16	10:00:00	20OCT2016	10:00	18JUL51			Never	Hispanic or Latino	Caucasian	Yes		2014	12	Screen Failure	65	Male								Yes	No	No	No	No
4		No	Yes	12_052	20OCT16	12:30:00	20OCT2016	12:30	04NOV64			Never	Hispanic or Latino	Black or African American	Yes		2002	12	Screen Failure	51	Female								Yes	No	No	No	No
4		No	Yes	12_053	21OCT16	7:55:00	21OCT2016	7:55	22JUL63			Never	Hispanic or Latino	Caucasian	No			12	Screen Failure	53	Male								Yes	No	No	No	No
4		No	Yes	12_054	21OCT16	9:02:00	21OCT2016	9:02	11DEC55			Never	Hispanic or Latino	Caucasian	No			12	Entered	60	Female	03NOV16	286	Placebo	>=250 mg/day	Yes	Yes	>=250 mg/day	No	Yes	Yes	Yes	Yes
4		No	Yes	12_055	21OCT16	9:30:00	21OCT2016	9:30	14AUG46			Never	Hispanic or Latino	Caucasian	No			12	Screen Failure	70	Female								Yes	No	No	No	No
4		No	Yes	12_056	21OCT16	9:53:00	21OCT2016	9:53	15DEC54		1	Weekly	Hispanic or Latino	Caucasian	Yes		2014	12	Early Termination	61	Male	03NOV16	287	Placebo	<250 mg/day	Yes	Yes	<250 mg/day	No	Yes	Yes	Yes	Yes
4		No	Yes	12_057	21OCT16	10:30:00	21OCT2016	10:30	08OCT51			Never	Hispanic or Latino	Caucasian	No			12	Entered	65	Female	10NOV16	294	Placebo	<250 mg/day	Yes	No	<250 mg/day	No	Yes	Yes	Yes	Yes
4		No	Yes	12_058	24OCT16	8:15:00	24OCT2016	8:15	04AUG48			Never	Hispanic or Latino	Caucasian	No			12	Entered	68	Male	16NOV16	181	Placebo	<250 mg/day	Yes	Yes	<250 mg/day	No	Yes	Yes	Yes	Yes
4		No	Yes	12_059	24OCT16	10:20:00	24OCT2016	10:20	29JUN49			Never	Hispanic or Latino	Caucasian	Yes		2012	12	Screen Failure	67	Female								Yes	No	No	No	No
4		No	Yes	12_060	25OCT16	12:08:00	25OCT2016	12:08	05MAY68			Never	Hispanic or Latino	Caucasian	No			12	Screen Failure	48	Female								Yes	No	No	No	No
4		No	Yes	12_061	26OCT16	9:25:00	26OCT2016	9:25	10OCT44			Never	Hispanic or Latino	Caucasian	Yes		2012	12	Screen Failure	72	Male								Yes	No	No	No	No
4		No	Yes	12_062	26OCT16	9:48:00	26OCT2016	9:48	19FEB63		1	Weekly	Hispanic or Latino	Caucasian	No			12	Entered	53	Male	16NOV16	295	MF4637	<250 mg/day	Yes	No	<250 mg/day	No	Yes	Yes	Yes	Yes
4		No	Yes	12_063	27OCT16	10:15:00	27OCT2016	10:15	03AUG45			Never	Hispanic or Latino	Caucasian	No			12	Screen Failure	71	Female								Yes	No	No	No	No
4		No	Yes	12_064	28OCT16	10:45:00	28OCT2016	10:45	03MAY44			Never	Hispanic or Latino	Black or African American	Yes		1996	12	Screen Failure	72	Female								Yes	No	No	No	No
4		No	Yes	12_065	01NOV16	9:30:00	01NOV2016	9:30	20MAR40			Never	Hispanic or Latino	Caucasian	No			12	Entered	76	Female	16NOV16	182	MF4637	<250 mg/day	Yes	Yes	<250 mg/day	No	Yes	Yes	Yes	Yes
4		No	Yes	12_066	01NOV16	10:20:00	01NOV2016	10:20	11JAN57			Never	Hispanic or Latino	Caucasian	Yes		2001	12	Screen Failure	59	Male								Yes	No	No	No	No
4		No	Yes	12_067	02NOV16	9:28:00	02NOV2016	9:28	27SEP44			Never	Hispanic or Latino	Caucasian	Yes		2004	12	Entered	72	Female	16NOV16	180	MF4637	>=250 mg/day	Yes	Yes	>=250 mg/day	No	Yes	Yes	Yes	Yes
4		No	Yes	12_068	02NOV16	10:28:00	02NOV2016	10:28	15SEP38			Never	Hispanic or Latino	Caucasian	No			12	Entered	78	Female	21NOV16	183	Placebo	>=250 mg/day	Yes	Yes	>=250 mg/day	No	Yes	Yes	Yes	Yes
4		No	Yes	12_069	03NOV16	10:16:00	03NOV2016	10:16	17SEP34			Never	Hispanic or Latino	Caucasian	Yes		1996	12	Screen Failure	82	Male								Yes	No	No	No	No
4		No	Yes	12_070	04NOV16	8:40:00	04NOV2016	8:40	28JUN60			Never	Hispanic or Latino	Black or African American	No			12	Screen Failure	56	Female								Yes	No	No	No	No
4		No	Yes	12_071	04NOV16	9:03:00	04NOV2016	9:03	19NOV57			Never	Hispanic or Latino	Caucasian	No			12	Screen Failure	58	Female								Yes	No	No	No	No
4		No	Yes	12_072	04NOV16	9:39:00	04NOV2016	9:39	01AUG60			Never	Hispanic or Latino	Caucasian	No			12	Screen Failure	56	Female								Yes	No	No	No	No
4		No	Yes	12_073	07NOV16	9:21:00	07NOV2016	9:21	22MAR56			Never	Hispanic or Latino	Caucasian	No			12	Screen Failure	60	Female								Yes	No	No	No	No
4		No	Yes	12_074	09NOV16	8:21:00	09NOV2016	8:21	11JAN53			Never	Hispanic or Latino	Black or African American	No			12	Screen Failure	63	Female								Yes	No	No	No	No
4		No	Yes	13_001	05OCT16	8:11:00	05OCT2016	8:11	15SEP74			Never	Hispanic or Latino	Caucasian	No			13	Entered	42	Female	28OCT16	162	Placebo	<250 mg/day	No	No	>=250 mg/day	No	Yes	Yes	Yes	Yes
4		No	Yes	13_002	05OCT16	8:02:00	05OCT2016	8:02	18JAN49			Never	Hispanic or Latino	Caucasian	No			13	Entered	67	Female	20OCT16	204	MF4637	<250 mg/day	Yes	Yes	<250 mg/day	No	Yes	Yes	Yes	Yes
4		No	Yes	13_003	05OCT16	8:15:00	05OCT2016	8:15	10OCT50			Never	Hispanic or Latino	Caucasian	No			13	Entered	65	Female	20OCT16	205	Placebo	<250 mg/day	Yes	Yes	<250 mg/day	No	Yes	Yes	Yes	Yes
4		No	Yes	13_004	05OCT16	8:20:00	05OCT2016	8:20	25APR47			Never	Hispanic or Latino	Caucasian	Yes		1986	13	Entered	69	Female	20OCT16	206	MF4637	<250 mg/day	No	Yes	<250 mg/day	No	Yes	Yes	Yes	Yes
4		No	Yes	13_005	12OCT16	8:15:00	12OCT2016	8:15	10JUL68			Never	Hispanic or Latino	Caucasian	No			13	Entered	48	Male	10NOV16	276	MF4637	<250 mg/day	No	No	<250 mg/day	No	Yes	Yes	Yes	Yes
4		No	Yes	13_006	12OCT16	8:05:00	12OCT2016	8:05	02DEC75		1	Weekly	Hispanic or Latino	Caucasian	No			13	Entered	40	Male	28OCT16	160	MF4637	<250 mg/day	No	No	<250 mg/day	No	Yes	Yes	Yes	Yes
4		No	Yes	13_007	12OCT16	10:21:00	12OCT2016	10:21	09APR59			Never	Hispanic or Latino	Caucasian	No			13	Screen Failure	57	Female								Yes	No	No	No	No
4		No	Yes	13_008	12OCT16	10:15:00	12OCT2016	10:15	14APR49			Never	Hispanic or Latino	Caucasian	No			13	Screen Failure	67	Male								Yes	No	No	No	No
4		No	Yes	13_009	14OCT16	7:30:00	14OCT2016	7:30	26SEP65			Never	Hispanic or Latino	Caucasian	Yes		FEB2015	13	Entered	51	Male	05NOV16	267	Placebo	<250 mg/day	No	Yes	>=250 mg/day	No	Yes	Yes	Yes	Yes
4		No	Yes	13_010	14OCT16	8:30:00	14OCT2016	8:30	01FEB57			Never	Hispanic or Latino	Caucasian	No			13	Screen Failure	59	Female								Yes	No	No	No	No
4		No	Yes	13_011	20OCT16	7:00:00	20OCT2016	7:00	03AUG73			Never	Hispanic or Latino	Caucasian	No			13	Entered	43	Male	28OCT16	207	Placebo	<250 mg/day	No	No	<250 mg/day	No	Yes	Yes	Yes	Yes
4		No	Yes	13_012	20OCT16	7:14:00	20OCT2016	7:14	26JAN73			Never	Hispanic or Latino	Caucasian	No			13	Screen Failure	43	Male							<250 mg/day	Yes	No	No	No	No
4		No	Yes	13_013	20OCT16	7:08:00	20OCT2016	7:08	18MAR70			Never	Hispanic or Latino	Caucasian	No			13	Entered	46	Male	28OCT16	161	MF4637	<250 mg/day	No	No	>=250 mg/day	No	Yes	Yes	Yes	Yes
4		No	Yes	13_014	21OCT16	8:03:00	21OCT2016	8:03	29SEP45			Never	Hispanic or Latino	Caucasian	No			13	Entered	71	Female	03NOV16	266	Placebo	<250 mg/day	No	Yes	<250 mg/day	No	Yes	Yes	Yes	Yes
4		No	Yes	13_015	21OCT16	8:01:00	21OCT2016	8:01	17MAY41			Never	Hispanic or Latino	Caucasian	Yes		1991	13	Entered	75	Male	03NOV16	264	MF4637	<250 mg/day	No	Yes	<250 mg/day	No	Yes	Yes	Yes	Yes
4		No	Yes	13_016	21OCT16	11:05:00	21OCT2016	11:05	05NOV45			Never	Hispanic or Latino	Caucasian	No			13	Entered	70	Female	28OCT16	163	Placebo	<250 mg/day	No	Yes	>=250 mg/day	No	Yes	Yes	Yes	Yes
4		No	Yes	13_017	26OCT16	10:05:00	26OCT2016	10:05	04MAY64			Never	Hispanic or Latino	Caucasian	No			13	Entered	52	Female	03NOV16	265	MF4637	<250 mg/day	Yes	Yes	>=250 mg/day	No	Yes	Yes	Yes	Yes
4		No	Yes	13_018	04NOV16	8:00:00	04NOV2016	8:00	24DEC65		1	Weekly	Hispanic or Latino	Caucasian	No			13	Screen Failure	50	Female								Yes	No	No	No	No
4		No	Yes	13_019	04NOV16	8:05:00	04NOV2016	8:05	18DEC68			Never	Hispanic or Latino	Caucasian	No			13	Entered	47	Female	23NOV16	278	Placebo	<250 mg/day	No	No	<250 mg/day	No	Yes	Yes	Yes	Yes
4		No	Yes	13_020	08NOV16	7:55:00	08NOV2016	7:55	21JAN61			Never	Hispanic or Latino	Caucasian	No			13	Entered	55	Male	17NOV16	277	Placebo	<250 mg/day	No	No	<250 mg/day	No	Yes	Yes	Yes	Yes
4		No	Yes	14_001	08SEP16	13:00:00	08SEP2016	13:00	04SEP55			Never	Hispanic or Latino	Caucasian	No			14	Entered	61	Male	25OCT16	185	Placebo	>=250 mg/day	No	Yes	>=250 mg/day	No	Yes	Yes	Yes	Yes
4		No	Yes	14_002	17SEP16	9:30:00	17SEP2016	9:30	17OCT71		1	Weekly	Hispanic or Latino	Caucasian	No			14	Entered	44	Female	12OCT16	208	MF4637	<250 mg/day	No	Yes	>=250 mg/day	No	Yes	Yes	Yes	Yes
4		No	Yes	14_003	17SEP16	10:45:00	17SEP2016	10:45	29MAR80		1	Weekly	Hispanic or Latino	Caucasian	No			14	Screen Failure	36	Female								Yes	No	No	No	No
4		No	Yes	14_004	17SEP16	11:25:00	17SEP2016	11:25	26AUG84			Never	Hispanic or Latino	Caucasian	No			14	Screen Failure	32	Female								Yes	No	No	No	No
4		No	Yes	14_005	17SEP16	12:10:00	17SEP2016	12:10	18JUL88			Never	Hispanic or Latino	Caucasian	No			14	Screen Failure	28	Male								Yes	No	No	No	No
4		No	Yes	14_006	17SEP16	13:00:00	17SEP2016	13:00	28NOV82	not reported	1	Weekly	Not Hispanic or Latino	Other	No			14	Screen Failure	33	Female							>=250 mg/day	Yes	No	No	No	No
4		No	Yes	14_007	26SEP16	9:27:00	26SEP2016	9:27	20AUG61			Never	Hispanic or Latino	Caucasian	No			14	Screen Failure	55	Female								Yes	No	No	No	No
4		No	Yes	14_008	26SEP16	18:00:00	26SEP2016	18:00	06APR60			Never	Not Hispanic or Latino	Caucasian	No			14	Screen Failure	56	Male								Yes	No	No	No	No
4		No	Yes	14_009	03OCT16	16:30:00	03OCT2016	16:30	25MAY47				Hispanic or Latino	Caucasian				14	Screen Failure	69	Male								Yes	No	No	No	No
4		No	Yes	14_010	12OCT16	16:36:00	12OCT2016	16:36	01MAY55		1	Weekly	Hispanic or Latino	Caucasian	Yes	01MAY82	01MAY1982	14	Early Termination	61	Female		184	MF4637	<250 mg/day	No	No	>=250 mg/day	No	No	Yes	No	No
4		No	Yes	14_011	12OCT16	17:08:00	12OCT2016	17:08	11NOV49	not reported		Never	Hispanic or Latino	Other	No			14	Screen Failure	66	Female								Yes	No	No	No	No
4		No	Yes	14_012	21OCT16	16:49:00	21OCT2016	16:49	05FEB82		6	Weekly	Hispanic or Latino	Caucasian	No			14	Early Termination	34	Male	15NOV16	186	Placebo	<250 mg/day	No	No	>=250 mg/day	No	Yes	Yes	Yes	Yes
4		No	Yes	14_013	21OCT16	16:00:00	21OCT2016	16:00	11JAN46			Never	Hispanic or Latino	Caucasian	No			14	Screen Failure	70	Female								Yes	No	No	No	No
4		No	Yes	14_014	04NOV16	15:45:00	04NOV2016	15:45	19AUG83		1	Weekly	Hispanic or Latino	Caucasian	No			14	Entered	33	Female	16NOV16	187	MF4637	<250 mg/day	No	No	>=250 mg/day	No	Yes	Yes	Yes	Yes
4		No	Yes	14_015	04NOV16	14:55:00	04NOV2016	14:55	18AUG59			Never	Not Hispanic or Latino	Black or African American	No			14	Screen Failure	57	Female								Yes	No	No	No	No
4		No	Yes	14_016	11NOV16	9:00:00	11NOV2016	9:00	29JUL65		2	Weekly	Hispanic or Latino	Caucasian	No			14	Entered	51	Female	01DEC16	209	Placebo	<250 mg/day	No	No	<250 mg/day	No	Yes	Yes	Yes	Yes
4		No	Yes	14_017	09NOV16	16:45:00	09NOV2016	16:45	15FEB63				Hispanic or Latino	Caucasian				14	Screen Failure	53	Female								Yes	No	No	No	No
4		No	Yes	14_018	10NOV16	10:45:00	10NOV2016	10:45	18MAY91		1	Weekly	Hispanic or Latino	Caucasian	No			14	Entered	25	Female	05DEC16	210	MF4637	>=250 mg/day	No	No	>=250 mg/day	No	Yes	Yes	Yes	Yes
4		No	Yes	14_019	11NOV16	16:15:00	11NOV2016	16:15	26FEB84		6	Weekly	Hispanic or Latino	Caucasian	Yes	29JUN16	29JUN2016	14	Entered	32	Male	03DEC16	211	Placebo	<250 mg/day	No	Yes	<250 mg/day	No	Yes	Yes	Yes	Yes
4		No	Yes	14_020	14NOV16	10:33:00	14NOV2016	10:33	26AUG63			Never	Hispanic or Latino	Caucasian	No			14	Screen Failure	53	Male								Yes	No	No	No	No
4		No	Yes	14_022	11NOV16	15:40:00	11NOV2016	15:40	12JAN62			Never	Hispanic or Latino	Caucasian	No			14	Screen Failure	54	Female								Yes	No	No	No	No
4		No	Yes	15_001	18AUG16	10:00:00	18AUG2016	10:00	25JAN71	White		Never	Hispanic or Latino	Other	No			15	Screen Failure	45	Male							>=250 mg/day	Yes	No	No	No	No
4		No	Yes	15_002	18AUG16	9:30:00	18AUG2016	9:30	20MAR49	White		Never	Hispanic or Latino	Other	No			15	Entered	67	Male	27SEP16	149	Placebo	<250 mg/day	No	No	<250 mg/day	No	Yes	Yes	Yes	Yes
4		No	Yes	15_003	25AUG16	10:00:00	25AUG2016	10:00	10SEP95			Never	Hispanic or Latino	Caucasian	Yes	10FEB16	10FEB2016	15	Screen Failure	20	Male							>=250 mg/day	Yes	No	No	No	No
4		No	Yes	15_004	29AUG16	9:00:00	29AUG2016	9:00	27OCT43			Never	Hispanic or Latino	Caucasian	Yes	21SEP15	21SEP2015	15	Screen Failure	72	Male							<250 mg/day	Yes	No	No	No	No
4		No	Yes	15_005	31AUG16	9:00:00	31AUG2016	9:00	29NOV57				Hispanic or Latino	Caucasian	No			15	Entered	58	Male	28SEP16	150	Placebo	<250 mg/day	No	No	>=250 mg/day	No	Yes	Yes	Yes	Yes
4		No	Yes	15_006	31AUG16	9:00:00	31AUG2016	9:00	26APR47			Never	Hispanic or Latino	Caucasian	No			15	Entered	69	Male	27SEP16	148	MF4637	<250 mg/day	No	No	>=250 mg/day	No	Yes	Yes	Yes	Yes
4		No	Yes	15_007	31AUG16	9:00:00	31AUG2016	9:00	29APR42			Never	Hispanic or Latino	Caucasian	No			15	Entered	74	Male	29SEP16	236	Placebo	<250 mg/day	No	No	>=250 mg/day	No	Yes	Yes	Yes	Yes
4		No	Yes	15_008	29AUG16	10:00:00	29AUG2016	10:00	09JUN61				Hispanic or Latino	Caucasian	No			15	Entered	55	Male	28SEP16	151	MF4637	<250 mg/day	No	No	<250 mg/day	No	Yes	Yes	Yes	Yes
4		No	Yes	15_009	31AUG16	9:00:00	31AUG2016	9:00	08AUG46			Never	Hispanic or Latino	Caucasian	No			15	Entered	70	Female	10OCT16	237	MF4637	<250 mg/day	No	No	<250 mg/day	No	Yes	Yes	Yes	Yes
4		No	Yes	15_010	06SEP16	9:00:00	06SEP2016	9:00	16NOV51			Never	Hispanic or Latino	Caucasian	Yes	01OCT14	01OCT2014	15	Entered	64	Female	11OCT16	238	Placebo	<250 mg/day	No	No	<250 mg/day	No	Yes	Yes	Yes	Yes
4		No	Yes	15_011	07SEP16	9:00:00	07SEP2016	9:00	26AUG50			Never	Hispanic or Latino	Caucasian	No			15	Entered	66	Male	13OCT16	240	Placebo	<250 mg/day	No	No	<250 mg/day	No	Yes	Yes	Yes	Yes
4		No	Yes	15_012	14SEP16	9:15:00	14SEP2016	9:15	30NOV61			Never	Hispanic or Latino	Caucasian	No			15	Entered	54	Female	19OCT16	241	Placebo	<250 mg/day	No	No	<250 mg/day	No	Yes	Yes	Yes	Yes
4		No	Yes	15_013	15SEP16	9:00:00	15SEP2016	9:00	07FEB58			Never	Hispanic or Latino	Caucasian	No			15	Entered	58	Female	13OCT16	242	MF4637	<250 mg/day	No	No	>=250 mg/day	No	Yes	Yes	Yes	Yes
4		No	Yes	15_014	02SEP16	9:20:00	02SEP2016	9:20	06OCT60			Never	Hispanic or Latino	Caucasian	No			15	Entered	55	Female	13OCT16	239	MF4637	<250 mg/day	No	No	>=250 mg/day	No	Yes	Yes	Yes	Yes
4		No	Yes	15_015	07SEP16	9:00:00	07SEP2016	9:00	22JUN35			Never	Hispanic or Latino	Caucasian	No			15	Entered	81	Female	09NOV16	268	MF4637	<250 mg/day	No	No	<250 mg/day	No	Yes	Yes	Yes	Yes
4		No	Yes	15_016	13OCT16	9:00:00	13OCT2016	9:00	26SEP39			Never	Hispanic or Latino	Caucasian	No			15	Entered	77	Female	09NOV16	243	MF4637	<250 mg/day	Yes	No	>=250 mg/day	No	Yes	Yes	Yes	Yes
4		No	Yes	15_017	07SEP16	9:00:00	07SEP2016	9:00	30MAY54			Never	Hispanic or Latino	Caucasian	No			15	Entered	62	Male	10NOV16	270	Placebo	<250 mg/day	No	No	<250 mg/day	No	Yes	Yes	Yes	No
4		No	Yes	15_018	11OCT16	9:00:00	11OCT2016	9:00	10FEB59			Never	Hispanic or Latino	Caucasian	No			15	Entered	57	Male	15NOV16	269	MF4637	<250 mg/day	No	No	<250 mg/day	No	Yes	Yes	Yes	Yes
4		No	Yes	15_019	13OCT16	9:10:00	13OCT2016	9:10	26MAY78			Never	Hispanic or Latino	Caucasian	No			15	Entered	38	Female	17NOV16	271	Placebo	<250 mg/day	No	No	>=250 mg/day	No	Yes	Yes	Yes	Yes
4		No	Yes	15_020	26OCT16	9:00:00	26OCT2016	9:00	31AUG51			Never	Hispanic or Latino	Caucasian	No			15	Early Termination	65	Female	30NOV16	272	MF4637	<250 mg/day	No	No	>=250 mg/day	No	Yes	Yes	Yes	Yes
4		No	Yes	15_021	03NOV16	9:00:00	03NOV2016	9:00	29OCT75			Never	Hispanic or Latino	Caucasian	No			15	Entered	41	Male	02DEC16	273	Placebo	<250 mg/day	No	No	>=250 mg/day	No	Yes	Yes	Yes	Yes
4		No	Yes	15_022	03NOV16	9:10:00	03NOV2016	9:10	11JUL68			Never	Hispanic or Latino	Caucasian	No			15	Entered	48	Male	09DEC16	274	Placebo	<250 mg/day	No	No	<250 mg/day	No	Yes	Yes	Yes	Yes
4		No	Yes	15_023	08SEP16	9:10:00	08SEP2016	9:10	16MAR58			Never	Hispanic or Latino	Caucasian	No			15	Entered	58	Female	06DEC16	275	MF4637	<250 mg/day	No	No	>=250 mg/day	No	Yes	Yes	Yes	Yes
4		No	Yes	15_024	07NOV16	9:00:00	07NOV2016	9:00	12JUL42			Never	Hispanic or Latino	Caucasian	No			15	Screen Failure	74	Female							<250 mg/day	Yes	No	No	No	No
4		No	Yes	15_025	09NOV16	9:00:00	09NOV2016	9:00	06MAY47			Never	Hispanic or Latino	Caucasian	No			15	Screen Failure	69	Female								Yes	No	No	No	No
4		No	Yes	15_026	09NOV16	9:10:00	09NOV2016	9:10	06AUG46			Never	Hispanic or Latino	Caucasian	No			15	Screen Failure	70	Female							>=250 mg/day	Yes	No	No	No	No
4		No	Yes	16_001	14OCT16	9:40:00	14OCT2016	9:40	19JAN63		2		Hispanic or Latino	Caucasian	Yes		1986	16	Early Termination	53	Male	31OCT16	152	Placebo	<250 mg/day	No	No	<250 mg/day	No	Yes	Yes	Yes	Yes
4		No	Yes	16_002	14OCT16	9:57:00	14OCT2016	9:57	19JUN63			Never	Hispanic or Latino	Caucasian	No			16	Early Termination	53	Male	03NOV16	154	MF4637	<250 mg/day	No	No	<250 mg/day	No	Yes	Yes	Yes	Yes
4		No	Yes	16_003	14OCT16	8:34:00	14OCT2016	8:34	28JAN57			Never	Hispanic or Latino	Caucasian	Yes		2006	16	Entered	59	Male	03NOV16	153	Placebo	>=250 mg/day	No	No	>=250 mg/day	No	Yes	Yes	Yes	Yes
4		No	Yes	16_004	18OCT16	8:02:00	18OCT2016	8:02	15DEC65			Never	Hispanic or Latino	Caucasian	No			16	Screen Failure	50	Male								Yes	No	No	No	No
4		No	Yes	16_005	28OCT16	8:06:00	28OCT2016	8:06	29OCT55			Never	Hispanic or Latino	Caucasian	Yes	01DEC15	01DEC2015	16	Entered	60	Male	12NOV16	155	MF4637	<250 mg/day	No	No	<250 mg/day	No	Yes	Yes	Yes	Yes
4		No	Yes	16_006	04NOV16	4:48:00	04NOV2016	4:48	07AUG59			Never	Hispanic or Latino	Caucasian	No			16	Screen Failure	57	Female								Yes	No	No	No	No
4		No	Yes	16_007	04NOV16	8:52:00	04NOV2016	8:52	12MAR59			Never	Hispanic or Latino	Caucasian	No			16	Entered	57	Female	28NOV16	156	Placebo	>=250 mg/day	No	No	>=250 mg/day	No	Yes	Yes	Yes	Yes
4		No	Yes	16_008	04NOV16	9:46:00	04NOV2016	9:46	15NOV57			Never	Hispanic or Latino	Caucasian	Yes	01JAN11	01JAN2011	16	Entered	58	Female	18NOV16	158	MF4637	>=250 mg/day	No	No	>=250 mg/day	No	Yes	Yes	Yes	Yes
4		No	Yes	17_001	12OCT16	10:00:00	12OCT2016	10:00	07JUL45			Never	Hispanic or Latino	Caucasian	No			17	Entered	71	Male	08NOV16	212	Placebo	<250 mg/day	No	No	<250 mg/day	No	Yes	Yes	Yes	Yes
4		No	Yes	17_002	13OCT16	10:00:00	13OCT2016	10:00	26MAY46			Never	Hispanic or Latino	Caucasian	No			17	Entered	70	Female	10NOV16	192	MF4637	<250 mg/day	Yes	No	<250 mg/day	No	Yes	Yes	Yes	Yes
4		No	Yes	17_003	13OCT16	10:20:00	13OCT2016	10:20	01NOV53			Never	Hispanic or Latino	Caucasian	No			17	Entered	62	Female	10NOV16	193	MF4637	>=250 mg/day	Yes	No	<250 mg/day	No	Yes	Yes	Yes	Yes
4		No	Yes	17_004	18OCT16	9:20:00	18OCT2016	9:20	06JUL51			Never	Hispanic or Latino	Caucasian	No			17	Screen Failure	65	Male							<250 mg/day	Yes	No	No	No	No
4		No	Yes	17_005	19OCT16	9:50:00	19OCT2016	9:50	04JUN51			Never	Hispanic or Latino	Caucasian	No			17	Entered	65	Female	16NOV16	213	MF4637	<250 mg/day	No	No	<250 mg/day	No	Yes	Yes	Yes	Yes
4		No	Yes	17_006	24OCT16	9:00:00	24OCT2016	9:00	11DEC54			Never	Hispanic or Latino	Caucasian	No			17	Entered	61	Female	21NOV16	194	Placebo	<250 mg/day	No	No	<250 mg/day	No	Yes	Yes	Yes	Yes
4		No	Yes	17_007	24OCT16	10:00:00	24OCT2016	10:00	16NOV54			Never	Hispanic or Latino	Caucasian	No			17	Entered	61	Male	21NOV16	214	MF4637	<250 mg/day	No	No	<250 mg/day	No	Yes	Yes	Yes	Yes
4		No	Yes	17_008	28OCT16	11:00:00	28OCT2016	11:00	08APR49			Never	Hispanic or Latino	Caucasian	No			17	Entered	67	Female	25NOV16	195	Placebo	<250 mg/day	Yes	No	<250 mg/day	No	Yes	Yes	Yes	Yes
4		No	Yes	17_009	28OCT16	11:15:00	28OCT2016	11:15	10AUG46			Never	Hispanic or Latino	Caucasian	No			17	Entered	70	Male	25NOV16	215	Placebo	<250 mg/day	No	No	<250 mg/day	No	Yes	Yes	Yes	Yes
4		No	Yes	17_010	28OCT16	11:20:00	28OCT2016	11:20	20JAN48			Never	Hispanic or Latino	Caucasian	No			17	Entered	68	Female	25NOV16	230	MF4637	<250 mg/day	No	No	<250 mg/day	No	Yes	Yes	Yes	Yes
4		No	Yes	17_011	02NOV16	9:20:00	02NOV2016	9:20	14JAN58			Never	Hispanic or Latino	Caucasian	No			17	Screen Failure	58	Female							<250 mg/day	Yes	No	No	No	No
4		No	Yes	18_001	04OCT16	8:45:00	04OCT2016	8:45	26OCT69			Never	Hispanic or Latino	Caucasian	No			18	Entered	46	Female	18OCT16	220	Placebo	<250 mg/day	No	No	<250 mg/day	No	Yes	Yes	Yes	Yes
4		No	Yes	18_002	04OCT16	11:00:00	04OCT2016	11:00	19JUL64			Never	Hispanic or Latino	Caucasian	No			18	Entered	52	Female	24OCT16	222	MF4637	<250 mg/day	No	No	<250 mg/day	No	Yes	Yes	Yes	Yes
4		No	Yes	18_003	06OCT16	7:33:00	06OCT2016	7:33	12NOV60			Never	Hispanic or Latino	Caucasian	No			18	Entered	55	Female	26OCT16	221	Placebo	>=250 mg/day	Yes	Yes	>=250 mg/day	No	Yes	Yes	Yes	Yes
4		No	Yes	19_001	30SEP16	9:10:00	30SEP2016	9:10	26JUN63			Never	Hispanic or Latino	Caucasian	No			19	Entered	53	Female	28OCT16	225	Placebo	<250 mg/day	No	No	>=250 mg/day	No	Yes	Yes	Yes	Yes
4		No	Yes	19_002	03OCT16	8:50:00	03OCT2016	8:50	24OCT78			Never	Hispanic or Latino	Caucasian	No			19	Entered	37	Male	27OCT16	224	MF4637	<250 mg/day	No	No	<250 mg/day	No	Yes	Yes	Yes	Yes
4		No	Yes	19_003	05OCT16	8:50:00	05OCT2016	8:50	12MAR57			Never	Hispanic or Latino	Caucasian	No			19	Screen Failure	59	Female							>=250 mg/day	Yes	No	No	No	No
4	4	Yes	Yes	19_004	07OCT16	8:42:00	07OCT2016	8:42	27FEB63			Never	Hispanic or Latino	Caucasian	No			19	Entered	53	Female	04NOV16	226	MF4637	<250 mg/day	No	No	>=250 mg/day	No	Yes	Yes	Yes	Yes
4	4	Yes	Yes	19_005	07OCT16	9:23:00	07OCT2016	9:23	23FEB65			Never	Hispanic or Latino	Caucasian	No			19	Entered	51	Male	04NOV16	227	Placebo	<250 mg/day	No	No	<250 mg/day	No	Yes	Yes	Yes	Yes
4		No	Yes	19_006	14OCT16	8:55:00	14OCT2016	8:55	04APR43			Never	Hispanic or Latino	Caucasian	No			19	Screen Failure	73	Male							<250 mg/day	Yes	No	No	No	No
4		No	Yes	19_007	27OCT16	8:00:00	27OCT2016	8:00	15SEP66			Never	Hispanic or Latino	Caucasian	No			19	Entered	50	Male	21NOV16	289	MF4637	<250 mg/day	No	No	>=250 mg/day	No	Yes	Yes	Yes	Yes
4		No	Yes	19_008	27OCT16	9:09:00	27OCT2016	9:09	22MAY51			Never	Hispanic or Latino	Caucasian	No			19	Screen Failure	65	Female							>=250 mg/day	Yes	No	No	No	No
4		No	Yes	19_009	27OCT16	10:04:00	27OCT2016	10:04	13JUN67			Never	Hispanic or Latino	Caucasian	No			19	Entered	49	Female	21NOV16	290	Placebo	<250 mg/day	No	No	>=250 mg/day	No	Yes	Yes	Yes	Yes
4		No	Yes	19_010	28OCT16	9:03:00	28OCT2016	9:03	24MAY83			Never	Hispanic or Latino	Caucasian	No			19	Entered	33	Male	21NOV16	291	MF4637	<250 mg/day	No	No	>=250 mg/day	No	Yes	Yes	Yes	Yes
4		No	Yes	19_011	01NOV16	9:10:00	01NOV2016	9:10	19MAR44			Never	Hispanic or Latino	Caucasian	No			19	Screen Failure	72	Female							>=250 mg/day	Yes	No	No	No	No
4		No	Yes	19_012	03NOV16	8:03:00	03NOV2016	8:03	04JUN61			Never	Hispanic or Latino	Caucasian	No			19	Entered	55	Female	21NOV16	288	Placebo	<250 mg/day	Yes	No	>=250 mg/day	No	Yes	Yes	Yes	Yes
4		No	Yes	19_013	10NOV16	9:08:00	10NOV2016	9:08	25MAR51			Never	Hispanic or Latino	Caucasian	No			19	Screen Failure	65	Female							>=250 mg/day	Yes	No	No	No	No
