# Supplementary material for: Evaluation of a High Concentrate Omega-3 for Correcting the Omega-3 Fatty Acid Nutritional Deficiency in Non-alcoholic Fatty Liver Disease and effects on Hepatic Steatosis (CONDIN)
Source: Preprints.org preprint supplement (doi:10.20944/preprints201807.0240.v1), 2018-07-13
Supplement: Supplementary file 5 [file DS.xlsx]

## Sheet: DS
DSAENUM	DSREAOTH	DSCOMM	DSREA	SUBJID	DTHDT	CDDTH	MISSDOSE	DSCOMP	T_TRIAL	COMPLIAN	SITE	STATUS	AGE	SEX	FIRSTDT	RANDNO	TREAT	OMEGA	DIABETE	STATIN	OMEGA_C	SFFL	SAFETY	ITT	MITT	PP	PPREASON	T_TREAT
				02_001			12	Yes	224	100	02	Entered	57	Female	27OCT15	108	MF4637	<250 mg/day	Yes	Yes	<250 mg/day	No	Yes	Yes	Yes	Yes		174
				02_002			1	Yes	199	100	02	Entered	41	Male	06NOV15	109	MF4637	<250 mg/day	No	Yes	>=250 mg/day	No	Yes	Yes	Yes	Yes		166
				02_003			0	Yes	204	100	02	Entered	58	Male	03NOV15	110	Placebo	>=250 mg/day	Yes	Yes	<250 mg/day	No	Yes	Yes	Yes	Yes		166
		Subject was taken off IP inadvertently due to a visit scheduled significantly out of window.	Significant protocol violation on the part of the Principal Investigator or subject	02_004			1	No	190	100	02	Early Termination	60	Female	12NOV15	111	Placebo	<250 mg/day	Yes	Yes	<250 mg/day	No	Yes	Yes	Yes	Yes		139
				02_005			0	Yes	211	100	02	Entered	65	Male	04DEC15	112	Placebo	>=250 mg/day	No	No	>=250 mg/day	No	Yes	Yes	Yes	Yes		168
				02_006				No	1		02	Screen Failure	39	Female							<250 mg/day	Yes	No	No	No	No
			Significant non-compliance on the part of the subject; as determined by the PI	03_001				No	35	53.75	03	Early Termination	53	Male	19NOV15	117	MF4637	<250 mg/day	No	No	>=250 mg/day	No	Yes	Yes	No	No
	subject had gotten sick in December and stopped taking IP \n subject had abdominal pain diarrhea and vomiting and was resolved later but subject has been out of study to long so she was withdrawn.		Other	03_002			49	No	172	47.5	03	Early Termination	52	Female	30OCT15	116	Placebo	<250 mg/day	No	No	<250 mg/day	No	Yes	Yes	Yes	Yes		43
				03_003			3	Yes	237	104.737	03	Entered	25	Male	24NOV15	121	MF4637	<250 mg/day	No	No	<250 mg/day	No	Yes	Yes	Yes	Yes		190
				03_004			7	Yes	215	100.592	03	Entered	56	Female	24NOV15	118	Placebo	<250 mg/day	No	No	>=250 mg/day	No	Yes	Yes	Yes	Yes		173
	subject is scheduled to have a gastric sleeve done next week subject discontinue IP ON 22/MAR/2016 per surgeon.		Other	03_005			11	No	156	71.0526	03	Early Termination	49	Female	25NOV15	119	MF4637	>=250 mg/day	No	No	<250 mg/day	No	Yes	Yes	Yes	Yes		119
				03_006				No	1		03	Screen Failure	51	Male							<250 mg/day	Yes	No	No	No	No
				03_007			5	Yes	218	69.0741	03	Entered	40	Male	19NOV15	120	Placebo	<250 mg/day	No	No	<250 mg/day	No	Yes	Yes	Yes	No	Off study meds too long before final assessments (V5)	189
				03_008				No	1		03	Screen Failure	46	Male							>=250 mg/day	Yes	No	No	No	No
				03_009			1	Yes	225	92.7022	03	Entered	40	Male	13JAN16	122	MF4637	<250 mg/day	No	No	>=250 mg/day	No	Yes	Yes	Yes	Yes		167
				03_010			4	Yes	219	69.5122	03	Entered	41	Male	12JAN16	123	Placebo	>=250 mg/day	No	No	>=250 mg/day	No	Yes	Yes	Yes	Yes		167
				03_011			1	Yes	239	91.9626	03	Entered	55	Male	11FEB16	188	MF4637	<250 mg/day	No	Yes	<250 mg/day	No	Yes	Yes	Yes	Yes		173
				03_012			1	Yes	202	95.2652	03	Entered	63	Male	12FEB16	190	MF4637	<250 mg/day	No	Yes	<250 mg/day	No	Yes	Yes	Yes	Yes		173
				03_013			7	Yes	192	103.248	03	Entered	61	Female	11FEB16	189	Placebo	<250 mg/day	No	Yes	<250 mg/day	No	Yes	Yes	Yes	Yes		165
				04_001			6	Yes	190	75.0499	04	Entered	49	Female	13OCT15	124	Placebo	>=250 mg/day	Yes	No	>=250 mg/day	No	Yes	Yes	Yes	Yes		169
				04_002				No	1		04	Screen Failure	56	Male							<250 mg/day	Yes	No	No	No	No
				04_003				No	1		04	Screen Failure	35	Female							<250 mg/day	Yes	No	No	No	No
				04_004			44	Yes	187	51.8738	04	Entered	34	Male	15OCT15	125	MF4637	<250 mg/day	No	No	<250 mg/day	No	Yes	Yes	Yes	No	Compliance >70% but last meds not taken	125
				04_005				No	1		04	Screen Failure	40	Female							<250 mg/day	Yes	No	No	No	No
				04_006				No	1		04	Screen Failure	54	Female							>=250 mg/day	Yes	No	No	No	No
				04_007				No	1		04	Screen Failure	59	Female							>=250 mg/day	Yes	No	No	No	No
				04_008				No	1		04	Screen Failure	25	Female							>=250 mg/day	Yes	No	No	No	No
				04_009			1	Yes	191	97.561	04	Entered	53	Female	04JAN16	127	Placebo	<250 mg/day	No	No	<250 mg/day	No	Yes	Yes	Yes	Yes		168
				04_010			0	Yes	190	101.569	04	Entered	25	Female	05JAN16	126	MF4637	>=250 mg/day	No	No	>=250 mg/day	No	Yes	Yes	Yes	Yes		174
				04_011			0	Yes	211	99.0196	04	Entered	41	Male	26JAN16	129	Placebo	>=250 mg/day	No	No	>=250 mg/day	No	Yes	Yes	Yes	Yes		168
				04_012			1	Yes	190	89.0873	04	Entered	19	Male	19JAN16	128	Placebo	<250 mg/day	No	No	<250 mg/day	No	Yes	Yes	Yes	Yes		166
				04_013			6	Yes	190	97.2222	04	Entered	64	Female	15FEB16	130	MF4637	<250 mg/day	No	Yes	<250 mg/day	No	Yes	Yes	Yes	Yes		168
				04_014			17	Yes	193	26.1905	04	Entered	35	Female	25FEB16	131	MF4637	>=250 mg/day	No	No	>=250 mg/day	No	Yes	Yes	Yes	Yes		144
				04_015			3	Yes	242	101.149	04	Entered	50	Male	21MAR16	198	Placebo	<250 mg/day	No	Yes	<250 mg/day	No	Yes	Yes	Yes	No	Off study meds too long before final assessments (V5)	84
				04_016				No	1		04	Screen Failure	50	Male								Yes	No	No	No	No
				04_017				No	1		04	Screen Failure	49	Female								Yes	No	No	No	No
		Numerous attempts to contact patient by, phone, email and mailed letter. No response.	Refusal of the subject to continue treatment or observations.	04_018				No	102		04	Early Termination	37	Male		197	MF4637	<250 mg/day	No	No	<250 mg/day	No	No	Yes	No	No
		Numerous attempts made to contact patient by phone, email, and mailed letter. No response.	Refusal of the subject to continue treatment or observations.	04_019				No	98		04	Early Termination	50	Female		200	Placebo	<250 mg/day	No	No	<250 mg/day	No	No	Yes	No	No
				04_020			1	Yes	197	55.754	04	Entered	44	Male	28JUL16	196	MF4637	<250 mg/day	Yes	No	<250 mg/day	No	Yes	Yes	Yes	Yes		178
				04_021				No	1		04	Screen Failure	50	Male							<250 mg/day	Yes	No	No	No	No
				04_022			0	Yes	190	97.2222	04	Entered	44	Female	28JUL16	199	Placebo	>=250 mg/day	No	No	>=250 mg/day	No	Yes	Yes	Yes	Yes		168
				04_023			0	Yes	197	103.746	04	Entered	56	Male	17AUG16	202	MF4637	>=250 mg/day	No	No	>=250 mg/day	No	Yes	Yes	Yes	Yes		157
				04_024				No	1		04	Screen Failure	55	Female							<250 mg/day	Yes	No	No	No	No
				04_025			12	Yes	205	65.4412	04	Entered	49	Male	25AUG16	203	MF4637	<250 mg/day	No	No	<250 mg/day	No	Yes	Yes	Yes	Yes		178
				04_026				No	1		04	Screen Failure	36	Male							>=250 mg/day	Yes	No	No	No	No
			Significant non-compliance on the part of the subject; as determined by the PI	04_027				No	121		04	Early Termination	39	Female		201	Placebo	>=250 mg/day	No	No	>=250 mg/day	No	No	Yes	No	No
				04_028				No	1		04	Screen Failure	42	Male								Yes	No	No	No	No
				04_029				No	1		04	Screen Failure	67	Female								Yes	No	No	No	No
				04_030			0	Yes	206	109.98	04	Entered	67	Female	15SEP16	216	MF4637	>=250 mg/day	Yes	No	>=250 mg/day	No	Yes	Yes	Yes	Yes		161
				04_031			0	Yes	194	90.3811	04	Entered	56	Male	22SEP16	217	Placebo	<250 mg/day	Yes	No	<250 mg/day	No	Yes	Yes	Yes	Yes		168
		patient withdrew consent as needed to travel outside of Miami.	Refusal of the subject to continue treatment or observations.	04_032			0	No	205		04	Early Termination	53	Female	22SEP16	218	MF4637	<250 mg/day	No	No	<250 mg/day	No	Yes	Yes	No	No		42
				04_033				No	1		04	Screen Failure	42	Female								Yes	No	No	No	No
				04_034				No	1		04	Screen Failure	52	Male								Yes	No	No	No	No
				04_035			0	Yes	190	94.7368	04	Entered	59	Female	10OCT16	219	Placebo	>=250 mg/day	No	No	>=250 mg/day	No	Yes	Yes	Yes	Yes		119
				09_001				No	1		09	Screen Failure	45	Male							>=250 mg/day	Yes	No	No	No	No
				09_002				No	1		09	Screen Failure	48	Male							<250 mg/day	Yes	No	No	No	No
				09_003				No	1		09	Screen Failure	53	Male							<250 mg/day	Yes	No	No	No	No
				09_004			1	Yes	211	100	09	Entered	48	Male	05FEB16	164	Placebo	>=250 mg/day	Yes	Yes	<250 mg/day	No	Yes	Yes	Yes	Yes		180
				09_005			3	Yes	211	100	09	Entered	53	Male	05FEB16	166	MF4637	>=250 mg/day	Yes	Yes	<250 mg/day	No	Yes	Yes	Yes	Yes		171
				09_006				No	1		09	Screen Failure	72	Male							<250 mg/day	Yes	No	No	No	No
				09_007				No	1		09	Screen Failure	49	Female							>=250 mg/day	Yes	No	No	No	No
				09_008			1	Yes	218	100	09	Entered	49	Male	04MAR16	165	Placebo	<250 mg/day	No	No	<250 mg/day	No	Yes	Yes	Yes	Yes		168
				09_009				No	1		09	Screen Failure	73	Female							>=250 mg/day	Yes	No	No	No	No
				09_010				No	1		09	Screen Failure	73	Female							>=250 mg/day	Yes	No	No	No	No
				09_011				No	1		09	Screen Failure	68	Female							<250 mg/day	Yes	No	No	No	No
				09_012				No	1		09	Screen Failure	73	Male							<250 mg/day	Yes	No	No	No	No
				09_013				No	1		09	Screen Failure	57	Female							<250 mg/day	Yes	No	No	No	No
				09_014				No			09	Screen Failure										Yes	No	No	No	No
				09_015			1	Yes	245	100	09	Entered	72	Male	04OCT16	167	MF4637	>=250 mg/day	Yes	No	<250 mg/day	No	Yes	Yes	Yes	Yes		174
				09_016				No	1		09	Screen Failure	74	Female							<250 mg/day	Yes	No	No	No	No
				09_017				No	1		09	Screen Failure	69	Female							<250 mg/day	Yes	No	No	No	No
				09_018			0	Yes	284	100	09	Entered	73	Male	14NOV16	105	Placebo	>=250 mg/day	Yes	No	>=250 mg/day	No	Yes	Yes	Yes	Yes		170
				09_019				No	1		09	Screen Failure	74	Female							<250 mg/day	Yes	No	No	No	No
				09_020			0	Yes	227	100	09	Entered	53	Female	14OCT16	169	MF4637	>=250 mg/day	Yes	No	<250 mg/day	No	Yes	Yes	Yes	Yes		174
				09_021			2	Yes	244	100	09	Entered	54	Male	27OCT16	104	MF4637	>=250 mg/day	No	No	<250 mg/day	No	Yes	Yes	Yes	Yes		174
				09_022				No	1		09	Screen Failure	55	Male							<250 mg/day	Yes	No	No	No	No
				09_023				No	1		09	Screen Failure	68	Female							<250 mg/day	Yes	No	No	No	No
				09_024			10	Yes	218	94.9438	09	Entered	47	Male	04OCT16	168	Placebo	>=250 mg/day	Yes	No	<250 mg/day	No	Yes	Yes	Yes	No	Off study meds too long before final assessments (V5)	165
				09_025				No	1		09	Screen Failure	70	Female							<250 mg/day	Yes	No	No	No	No
				09_026			0	Yes	218	100	09	Entered	55	Female	12DEC16	171	Placebo	>=250 mg/day	No	No	<250 mg/day	No	Yes	Yes	Yes	Yes		178
	Never returned	The subject was scheduled to come to visit 4 on 07/Mar/2017 and she didn't come, Subject didn't answer to our phone calls and never returned the IP that dispensed in visit No 3	Other	09_027			0	No	77	50	09	Early Termination	60	Female	12DEC16	107	Placebo	>=250 mg/day	Yes	No	<250 mg/day	No	Yes	Yes	No	No		42
				09_028				No	1		09	Screen Failure	44	Female							<250 mg/day	Yes	No	No	No	No
	Never returned	The subject was scheduled to come to visit 4 on 07/Mar/2017 and she didn't come, Subject didn't answer to our phone calls and never returned the IP that dispensed in visit No 3	Other	09_029			0	No	77	100	09	Early Termination	63	Female	12DEC16	106	MF4637	>=250 mg/day	Yes	No	<250 mg/day	No	Yes	Yes	No	No		42
				09_030			14	Yes	211	73.1441	09	Entered	59	Female	12DEC16	170	MF4637	>=250 mg/day	No	No	<250 mg/day	No	Yes	Yes	Yes	Yes		174
				10_001				No	1		10	Screen Failure	31	Male							>=250 mg/day	Yes	No	No	No	No
				10_002				No	1		10	Screen Failure	33	Male							<250 mg/day	Yes	No	No	No	No
				10_003				No	1		10	Screen Failure	54	Female							<250 mg/day	Yes	No	No	No	No
				10_004			11	Yes	200	94.6429	10	Entered	47	Male	01FEB16	172	MF4637	>=250 mg/day	No	No	>=250 mg/day	No	Yes	Yes	Yes	Yes		168
				10_005				No	1		10	Screen Failure	37	Female								Yes	No	No	No	No
				10_006			5	Yes	200	98.1928	10	Entered	55	Male	25FEB16	174	Placebo	<250 mg/day	No	No	<250 mg/day	No	Yes	Yes	Yes	Yes		166
				10_007			1	Yes	200	100	10	Entered	54	Female	01MAR16	173	MF4637	<250 mg/day	No	Yes	<250 mg/day	No	Yes	Yes	Yes	Yes		174
				10_008				No	1		10	Screen Failure	64	Female								Yes	No	No	No	No
				10_009			12	Yes	192	95.2381	10	Entered	64	Female	27JUN16	176	MF4637	<250 mg/day	No	No	<250 mg/day	No	Yes	Yes	Yes	Yes		167
				10_010			37	Yes	206	77.5148	10	Entered	34	Male	27SEP16	175	Placebo	>=250 mg/day	No	No	>=250 mg/day	No	Yes	Yes	Yes	Yes		169
				10_011				No	1		10	Screen Failure	50	Male								Yes	No	No	No	No
				10_012			1	Yes	197	99.4012	10	Entered	53	Male	12OCT16	177	Placebo	<250 mg/day	No	Yes	<250 mg/day	No	Yes	Yes	Yes	Yes		168
				10_013				No	1		10	Screen Failure	66	Female								Yes	No	No	No	No
				11_001				No	1		11	Screen Failure	70	Female								Yes	No	No	No	No
				11_002				No	1		11	Screen Failure	63	Female								Yes	No	No	No	No
		Patient was out the country, never came back to the site.	Refusal of the subject to continue treatment or observations.	11_003			0	No	124	94.3182	11	Early Termination	52	Male	15SEP16	142	Placebo	<250 mg/day	Yes	Yes	>=250 mg/day	No	Yes	Yes	Yes	Yes		89
				11_004			19	Yes	202	99.2126	11	Entered	42	Female	02SEP16	140	MF4637	<250 mg/day	Yes	No	<250 mg/day	No	Yes	Yes	Yes	Yes		167
			Refusal of the subject to continue treatment or observations.	11_005			7	No	85	69.8305	11	Early Termination	63	Male	26SEP16	141	MF4637	>=250 mg/day	No	No	>=250 mg/day	No	Yes	Yes	No	No		11
				11_006			9	Yes	205	85.7143	11	Entered	54	Female	29SEP16	146	Placebo	<250 mg/day	Yes	No	>=250 mg/day	No	Yes	Yes	Yes	Yes		169
				11_007				No	1		11	Screen Failure	48	Female							>=250 mg/day	Yes	No	No	No	No
				11_008			4	Yes	195	92.3077	11	Entered	42	Male	27SEP16	144	MF4637	<250 mg/day	No	No	>=250 mg/day	No	Yes	Yes	Yes	Yes		168
				11_009			3	Yes	197	98.8024	11	Entered	50	Female	01OCT16	147	Placebo	<250 mg/day	No	No	<250 mg/day	No	Yes	Yes	Yes	Yes		167
				11_010			12	Yes	194	93.6128	11	Entered	52	Female	27SEP16	143	Placebo	<250 mg/day	No	Yes	<250 mg/day	No	Yes	Yes	Yes	Yes		168
				11_011			7	Yes	207	82.9268	11	Entered	41	Female	19OCT16	244	Placebo	<250 mg/day	No	No	>=250 mg/day	No	Yes	Yes	Yes	Yes		163
				11_012			4	Yes	209	92.3977	11	Entered	40	Female	18OCT16	145	MF4637	<250 mg/day	No	No	<250 mg/day	No	Yes	Yes	Yes	Yes		139
				11_013				No	1		11	Screen Failure	29	Female								Yes	No	No	No	No
				11_014			2	Yes	198	80.6202	11	Entered	49	Female	17NOV16	247	Placebo	>=250 mg/day	No	No	>=250 mg/day	No	Yes	Yes	Yes	No	Compliance <80%	67
				11_015			3	Yes	189	89.8204	11	Entered	62	Male	10NOV16	245	MF4637	<250 mg/day	No	No	>=250 mg/day	No	Yes	Yes	Yes	Yes		167
				11_016				No	1		11	Screen Failure	55	Female							>=250 mg/day	Yes	No	No	No	No
				11_017			36	Yes	199	87.5502	11	Entered	32	Female	28NOV16	246	MF4637	<250 mg/day	No	No	<250 mg/day	No	Yes	Yes	Yes	Yes		163
				11_018			9	Yes	191	102.828	11	Entered	45	Female	29NOV16	248	Placebo	<250 mg/day	No	No	>=250 mg/day	No	Yes	Yes	Yes	Yes		165
				12_001			0	Yes	218	100	12	Entered	66	Male	14OCT16	257	MF4637	>=250 mg/day	Yes	Yes	>=250 mg/day	No	Yes	Yes	Yes	Yes		84
				12_002				No	1		12	Screen Failure	71	Male								Yes	No	No	No	No
				12_003			6	Yes	213	96.4286	12	Entered	52	Male	11OCT16	138	Placebo	>=250 mg/day	Yes	No	>=250 mg/day	No	Yes	Yes	Yes	Yes		168
				12_004			3	Yes	195	98.8439	12	Entered	70	Male	22SEP16	133	Placebo	>=250 mg/day	Yes	Yes	>=250 mg/day	No	Yes	Yes	Yes	Yes		173
				12_005				No	1		12	Screen Failure	72	Female								Yes	No	No	No	No
				12_006			5	Yes	195	97.8682	12	Entered	76	Female	22SEP16	132	MF4637	<250 mg/day	Yes	Yes	<250 mg/day	No	Yes	Yes	Yes	Yes		172
				12_007			1	Yes	197	92.1212	12	Entered	64	Female	30SEP16	134	Placebo	>=250 mg/day	No	Yes	>=250 mg/day	No	Yes	Yes	Yes	Yes		84
				12_008				No	1		12	Screen Failure	68	Female								Yes	No	No	No	No
			Refusal of the subject to continue treatment or observations.	12_009			6	No	100	88.0952	12	Early Termination	53	Female	26OCT16	260	MF4637	>=250 mg/day	Yes	Yes	>=250 mg/day	No	Yes	Yes	Yes	Yes		42
				12_010				No	1		12	Screen Failure	72	Male								Yes	No	No	No	No
				12_011				No	31		12	Screen Failure	77	Male								Yes	No	No	No	No
				12_012				No	1		12	Screen Failure	51	Female								Yes	No	No	No	No
				12_013			10	Yes	212	91.8871	12	Entered	52	Female	30SEP16	137	MF4637	>=250 mg/day	No	Yes	>=250 mg/day	No	Yes	Yes	Yes	Yes		174
				12_014			13	Yes	187	89.0909	12	Entered	66	Female	30SEP16	136	Placebo	>=250 mg/day	Yes	Yes	>=250 mg/day	No	Yes	Yes	Yes	Yes		165
			Significant non-compliance on the part of the subject; as determined by the PI	12_015			0	No	129	76.2667	12	Early Termination	47	Female	30SEP16	135	MF4637	>=250 mg/day	Yes	Yes	>=250 mg/day	No	Yes	Yes	Yes	Yes		42
				12_016			1	Yes	197	100	12	Entered	52	Female	05OCT16	103	MF4637	<250 mg/day	No	No	<250 mg/day	No	Yes	Yes	Yes	Yes		166
				12_017			4	Yes	191	97.8044	12	Entered	57	Female	05OCT16	100	Placebo	>=250 mg/day	Yes	Yes	>=250 mg/day	No	Yes	Yes	Yes	Yes		166
				12_018				No	1		12	Screen Failure	77	Female								Yes	No	No	No	No
				12_019			7	Yes	190	89.4212	12	Entered	53	Male	05OCT16	102	Placebo	<250 mg/day	Yes	Yes	<250 mg/day	No	Yes	Yes	Yes	Yes		84
				12_020			3	Yes	189	98.8024	12	Entered	60	Female	05OCT16	101	MF4637	>=250 mg/day	Yes	Yes	>=250 mg/day	No	Yes	Yes	Yes	Yes		166
				12_021			2	Yes	216	98.4293	12	Entered	54	Male	11OCT16	254	MF4637	>=250 mg/day	Yes	Yes	>=250 mg/day	No	Yes	Yes	Yes	Yes		174
				12_022			1	Yes	197	99.4012	12	Entered	43	Male	12OCT16	253	Placebo	<250 mg/day	Yes	No	<250 mg/day	No	Yes	Yes	Yes	Yes		166
				12_023				No	1		12	Screen Failure	44	Female								Yes	No	No	No	No
			Significant non-compliance on the part of the subject; as determined by the PI	12_024			4	No	95	43.4109	12	Early Termination	41	Female	11OCT16	139	MF4637	>=250 mg/day	Yes	No	>=250 mg/day	No	Yes	Yes	Yes	Yes		35
				12_025			8	Yes	194	96.3855	12	Entered	73	Male	14OCT16	258	MF4637	>=250 mg/day	Yes	No	>=250 mg/day	No	Yes	Yes	Yes	Yes		164
				12_026				No	1		12	Screen Failure	62	Male								Yes	No	No	No	No
				12_027			9	Yes	196	97.6331	12	Entered	56	Female	12OCT16	252	Placebo	<250 mg/day	No	Yes	<250 mg/day	No	Yes	Yes	Yes	Yes		169
				12_028			9	Yes	192	94.2116	12	Entered	71	Female	14OCT16	259	Placebo	<250 mg/day	Yes	Yes	<250 mg/day	No	Yes	Yes	Yes	Yes		166
				12_029			3	Yes	190	98.8024	12	Entered	72	Male	12OCT16	256	Placebo	>=250 mg/day	Yes	Yes	>=250 mg/day	No	Yes	Yes	Yes	Yes		166
				12_030			9	Yes	190	93.8492	12	Entered	56	Male	12OCT16	255	MF4637	<250 mg/day	Yes	Yes	<250 mg/day	No	Yes	Yes	Yes	Yes		168
				12_031				No	1		12	Screen Failure	54	Female								Yes	No	No	No	No
				12_032			3	Yes	210	99.002	12	Entered	67	Male	02NOV16	280	Placebo	>=250 mg/day	Yes	No	>=250 mg/day	No	Yes	Yes	Yes	Yes		166
				12_033			2	Yes	205	99.002	12	Entered	72	Female	02NOV16	282	MF4637	>=250 mg/day	Yes	No	>=250 mg/day	No	Yes	Yes	Yes	Yes		166
				12_034			15	Yes	213	91.6211	12	Entered	55	Female	26OCT16	261	Placebo	>=250 mg/day	Yes	No	>=250 mg/day	No	Yes	Yes	Yes	No	Off study meds too long before final assessments (V5)	174
				12_035				No	1		12	Screen Failure	52	Female								Yes	No	No	No	No
				12_036				No	1		12	Screen Failure	51	Male								Yes	No	No	No	No
				12_037				No	1		12	Screen Failure	46	Female								Yes	No	No	No	No
				12_038			10	Yes	197	92.8994	12	Entered	62	Male	26OCT16	263	Placebo	>=250 mg/day	Yes	Yes	>=250 mg/day	No	Yes	Yes	Yes	Yes		84
				12_039			15	Yes	197	93.2939	12	Entered	57	Male	26OCT16	262	MF4637	<250 mg/day	No	No	<250 mg/day	No	Yes	Yes	Yes	Yes		169
				12_040			3	Yes	211	97.5238	12	Entered	60	Female	10NOV16	292	MF4637	>=250 mg/day	Yes	Yes	>=250 mg/day	No	Yes	Yes	Yes	Yes		174
			Refusal of the subject to continue treatment or observations.	12_041				No	55	89.4737	12	Early Termination	54	Female	10NOV16	293	Placebo	>=250 mg/day	Yes	Yes	>=250 mg/day	No	Yes	Yes	Yes	Yes
				12_042				No	1		12	Screen Failure	62	Male								Yes	No	No	No	No
				12_043			3	Yes	202	97.8175	12	Entered	77	Male	03NOV16	283	MF4637	>=250 mg/day	Yes	Yes	>=250 mg/day	No	Yes	Yes	Yes	Yes		168
				12_044			2	Yes	201	99.4012	12	Entered	66	Male	02NOV16	281	Placebo	>=250 mg/day	Yes	Yes	>=250 mg/day	No	Yes	Yes	Yes	Yes		166
				12_045				No	1		12	Screen Failure	65	Female								Yes	No	No	No	No
				12_046			5	Yes	197	95.6349	12	Entered	75	Male	03NOV16	284	MF4637	>=250 mg/day	Yes	Yes	>=250 mg/day	No	Yes	Yes	Yes	Yes		168
				12_047				No	16		12	Screen Failure	46	Male							<250 mg/day	Yes	No	No	No	No
				12_048			5	Yes	198	97.5904	12	Entered	63	Female	03NOV16	285	MF4637	<250 mg/day	Yes	No	<250 mg/day	No	Yes	Yes	Yes	Yes		164
				12_049				No	1		12	Screen Failure	49	Male								Yes	No	No	No	No
				12_050				No	1		12	Screen Failure	69	Female								Yes	No	No	No	No
				12_051				No	1		12	Screen Failure	65	Male								Yes	No	No	No	No
				12_052				No	1		12	Screen Failure	51	Female								Yes	No	No	No	No
				12_053				No	1		12	Screen Failure	53	Male								Yes	No	No	No	No
				12_054			7	Yes	195	95.2381	12	Entered	60	Female	03NOV16	286	Placebo	>=250 mg/day	Yes	Yes	>=250 mg/day	No	Yes	Yes	Yes	Yes		168
				12_055				No	1		12	Screen Failure	70	Female								Yes	No	No	No	No
1			Occurrence of any adverse event or condition that could; in the PI's opinion; interfere with the evaluation of the treatment effect or put the subject at undue risk.	12_056				No	97	76.1905	12	Early Termination	61	Male	03NOV16	287	Placebo	<250 mg/day	Yes	Yes	<250 mg/day	No	Yes	Yes	Yes	Yes
				12_057			2	Yes	202	98.8095	12	Entered	65	Female	10NOV16	294	Placebo	<250 mg/day	Yes	No	<250 mg/day	No	Yes	Yes	Yes	Yes		168
				12_058			1	Yes	206	99.4048	12	Entered	68	Male	16NOV16	181	Placebo	<250 mg/day	Yes	Yes	<250 mg/day	No	Yes	Yes	Yes	Yes		168
				12_059				No	1		12	Screen Failure	67	Female								Yes	No	No	No	No
				12_060				No	1		12	Screen Failure	48	Female								Yes	No	No	No	No
				12_061				No	1		12	Screen Failure	72	Male								Yes	No	No	No	No
				12_062			2	Yes	204	98.9442	12	Entered	53	Male	16NOV16	295	MF4637	<250 mg/day	Yes	No	<250 mg/day	No	Yes	Yes	Yes	Yes		168
				12_063				No	1		12	Screen Failure	71	Female								Yes	No	No	No	No
				12_064				No	1		12	Screen Failure	72	Female								Yes	No	No	No	No
				12_065			4	Yes	198	97.7143	12	Entered	76	Female	16NOV16	182	MF4637	<250 mg/day	Yes	Yes	<250 mg/day	No	Yes	Yes	Yes	Yes		174
				12_066				No	1		12	Screen Failure	59	Male								Yes	No	No	No	No
				12_067			4	Yes	197	97.6331	12	Entered	72	Female	16NOV16	180	MF4637	>=250 mg/day	Yes	Yes	>=250 mg/day	No	Yes	Yes	Yes	Yes		168
				12_068			13	Yes	197	94.3089	12	Entered	78	Female	21NOV16	183	Placebo	>=250 mg/day	Yes	Yes	>=250 mg/day	No	Yes	Yes	Yes	Yes		160
				12_069				No	1		12	Screen Failure	82	Male								Yes	No	No	No	No
				12_070				No	1		12	Screen Failure	56	Female								Yes	No	No	No	No
				12_071				No	1		12	Screen Failure	58	Female								Yes	No	No	No	No
				12_072				No	1		12	Screen Failure	56	Female								Yes	No	No	No	No
				12_073				No	1		12	Screen Failure	60	Female								Yes	No	No	No	No
				12_074				No	1		12	Screen Failure	63	Female								Yes	No	No	No	No
				13_001			1	Yes	207	100	13	Entered	42	Female	28OCT16	162	Placebo	<250 mg/day	No	No	>=250 mg/day	No	Yes	Yes	Yes	Yes		173
				13_002			8	Yes	198	100.595	13	Entered	67	Female	20OCT16	204	MF4637	<250 mg/day	Yes	Yes	<250 mg/day	No	Yes	Yes	Yes	Yes		167
				13_003			7	Yes	198	100	13	Entered	65	Female	20OCT16	205	Placebo	<250 mg/day	Yes	Yes	<250 mg/day	No	Yes	Yes	Yes	Yes		167
				13_004			10	Yes	197	98.2143	13	Entered	69	Female	20OCT16	206	MF4637	<250 mg/day	No	Yes	<250 mg/day	No	Yes	Yes	Yes	Yes		167
				13_005			3	Yes	211	98.8095	13	Entered	48	Male	10NOV16	276	MF4637	<250 mg/day	No	No	<250 mg/day	No	Yes	Yes	Yes	Yes		173
				13_006			8	Yes	212	98.7952	13	Entered	40	Male	28OCT16	160	MF4637	<250 mg/day	No	No	<250 mg/day	No	Yes	Yes	Yes	Yes		176
				13_007				No	1		13	Screen Failure	57	Female								Yes	No	No	No	No
				13_008				No	1		13	Screen Failure	67	Male								Yes	No	No	No	No
				13_009			9	Yes	221	100	13	Entered	51	Male	05NOV16	267	Placebo	<250 mg/day	No	Yes	>=250 mg/day	No	Yes	Yes	Yes	Yes		165
				13_010				No	1		13	Screen Failure	59	Female								Yes	No	No	No	No
				13_011			8	Yes	191	100	13	Entered	43	Male	28OCT16	207	Placebo	<250 mg/day	No	No	<250 mg/day	No	Yes	Yes	Yes	Yes		166
				13_012				No	1		13	Screen Failure	43	Male							<250 mg/day	Yes	No	No	No	No
				13_013			0	Yes	210	100	13	Entered	46	Male	28OCT16	161	MF4637	<250 mg/day	No	No	>=250 mg/day	No	Yes	Yes	Yes	Yes		174
				13_014			6	Yes	196	100.794	13	Entered	71	Female	03NOV16	266	Placebo	<250 mg/day	No	Yes	<250 mg/day	No	Yes	Yes	Yes	Yes		168
				13_015			6	Yes	196	100	13	Entered	75	Male	03NOV16	264	MF4637	<250 mg/day	No	Yes	<250 mg/day	No	Yes	Yes	Yes	Yes		168
				13_016			7	Yes	191	101.587	13	Entered	70	Female	28OCT16	163	Placebo	<250 mg/day	No	Yes	>=250 mg/day	No	Yes	Yes	Yes	Yes		167
				13_017			8	Yes	186	101.004	13	Entered	52	Female	03NOV16	265	MF4637	<250 mg/day	Yes	Yes	>=250 mg/day	No	Yes	Yes	Yes	Yes		167
				13_018				No	1		13	Screen Failure	50	Female								Yes	No	No	No	No
				13_019			1	Yes	201	100	13	Entered	47	Female	23NOV16	278	Placebo	<250 mg/day	No	No	<250 mg/day	No	Yes	Yes	Yes	Yes		172
				13_020			0	Yes	192	100	13	Entered	55	Male	17NOV16	277	Placebo	<250 mg/day	No	No	<250 mg/day	No	Yes	Yes	Yes	Yes		85
				14_001			0	Yes	230	102.959	14	Entered	61	Male	25OCT16	185	Placebo	>=250 mg/day	No	Yes	>=250 mg/day	No	Yes	Yes	Yes	Yes		168
				14_002			0	Yes	203	100	14	Entered	44	Female	12OCT16	208	MF4637	<250 mg/day	No	Yes	>=250 mg/day	No	Yes	Yes	Yes	Yes		195
				14_003				No	1		14	Screen Failure	36	Female								Yes	No	No	No	No
				14_004				No	1		14	Screen Failure	32	Female								Yes	No	No	No	No
				14_005				No	1		14	Screen Failure	28	Male								Yes	No	No	No	No
				14_006				No	1		14	Screen Failure	33	Female							>=250 mg/day	Yes	No	No	No	No
				14_007				No	1		14	Screen Failure	55	Female								Yes	No	No	No	No
				14_008				No	1		14	Screen Failure	56	Male								Yes	No	No	No	No
				14_009				No	1		14	Screen Failure	69	Male								Yes	No	No	No	No
	patient was lost to follow up		Other	14_010				No	23		14	Early Termination	61	Female		184	MF4637	<250 mg/day	No	No	>=250 mg/day	No	No	Yes	No	No
				14_011				No	1		14	Screen Failure	66	Female								Yes	No	No	No	No
				14_012			1	Yes	119	97.8947	14	Early Termination	34	Male	15NOV16	186	Placebo	<250 mg/day	No	No	>=250 mg/day	No	Yes	Yes	Yes	Yes		83
				14_013				No	1		14	Screen Failure	70	Female								Yes	No	No	No	No
				14_014			1	Yes	194	100	14	Entered	33	Female	16NOV16	187	MF4637	<250 mg/day	No	No	>=250 mg/day	No	Yes	Yes	Yes	Yes		167
				14_015				No	11		14	Screen Failure	57	Female								Yes	No	No	No	No
				14_016			21	Yes	204	86.4706	14	Entered	51	Female	01DEC16	209	Placebo	<250 mg/day	No	No	<250 mg/day	No	Yes	Yes	Yes	Yes		170
				14_017				No	2		14	Screen Failure	53	Female								Yes	No	No	No	No
				14_018			2	Yes	209	104.734	14	Entered	25	Female	05DEC16	210	MF4637	>=250 mg/day	No	No	>=250 mg/day	No	Yes	Yes	Yes	Yes		169
				14_019			2	Yes	204	99.4083	14	Entered	32	Male	03DEC16	211	Placebo	<250 mg/day	No	Yes	<250 mg/day	No	Yes	Yes	Yes	Yes		167
				14_020				No	1		14	Screen Failure	53	Male								Yes	No	No	No	No
				14_022				No	1		14	Screen Failure	54	Female								Yes	No	No	No	No
				15_001				No	1		15	Screen Failure	45	Male							>=250 mg/day	Yes	No	No	No	No
				15_002			0	Yes	227		15	Entered	67	Male	27SEP16	149	Placebo	<250 mg/day	No	No	<250 mg/day	No	Yes	Yes	Yes	Yes		163
				15_003				No	1		15	Screen Failure	20	Male							>=250 mg/day	Yes	No	No	No	No
				15_004				No	1		15	Screen Failure	72	Male							<250 mg/day	Yes	No	No	No	No
				15_005			0	Yes	216	50	15	Entered	58	Male	28SEP16	150	Placebo	<250 mg/day	No	No	>=250 mg/day	No	Yes	Yes	Yes	Yes		169
				15_006			0	Yes	214		15	Entered	69	Male	27SEP16	148	MF4637	<250 mg/day	No	No	>=250 mg/day	No	Yes	Yes	Yes	Yes		169
				15_007			1	Yes	214	42.3154	15	Entered	74	Male	29SEP16	236	Placebo	<250 mg/day	No	No	>=250 mg/day	No	Yes	Yes	Yes	Yes		167
				15_008			1	Yes	216	45.8333	15	Entered	55	Male	28SEP16	151	MF4637	<250 mg/day	No	No	<250 mg/day	No	Yes	Yes	Yes	Yes		168
				15_009			0	Yes	225	44.3787	15	Entered	70	Female	10OCT16	237	MF4637	<250 mg/day	No	No	<250 mg/day	No	Yes	Yes	Yes	Yes		170
				15_010			2	Yes	221	85.77	15	Entered	64	Female	11OCT16	238	Placebo	<250 mg/day	No	No	<250 mg/day	No	Yes	Yes	Yes	Yes		172
				15_011			0	Yes	217	87.4747	15	Entered	66	Male	13OCT16	240	Placebo	<250 mg/day	No	No	<250 mg/day	No	Yes	Yes	Yes	Yes		167
				15_012			3	Yes	213	74.6914	15	Entered	54	Female	19OCT16	241	Placebo	<250 mg/day	No	No	<250 mg/day	No	Yes	Yes	Yes	Yes		164
				15_013			1	Yes	209	56.8273	15	Entered	58	Female	13OCT16	242	MF4637	<250 mg/day	No	No	>=250 mg/day	No	Yes	Yes	Yes	Yes		167
				15_014			1	Yes	225		15	Entered	55	Female	13OCT16	239	MF4637	<250 mg/day	No	No	>=250 mg/day	No	Yes	Yes	Yes	Yes		170
				15_015			3	Yes	245	16.8651	15	Entered	81	Female	09NOV16	268	MF4637	<250 mg/day	No	No	<250 mg/day	No	Yes	Yes	Yes	Yes		168
				15_016			0	Yes	211	98.2249	15	Entered	77	Female	09NOV16	243	MF4637	<250 mg/day	Yes	No	>=250 mg/day	No	Yes	Yes	Yes	Yes		170
				15_017			3	Yes	293	21.2766	15	Entered	62	Male	10NOV16	270	Placebo	<250 mg/day	No	No	<250 mg/day	No	Yes	Yes	Yes	No	Off study meds too long before final assessments (V5)	174
				15_018			0	Yes	215	47.561	15	Entered	57	Male	15NOV16	269	MF4637	<250 mg/day	No	No	<250 mg/day	No	Yes	Yes	Yes	Yes		174
				15_019			1	Yes	216	72.8395	15	Entered	38	Female	17NOV16	271	Placebo	<250 mg/day	No	No	>=250 mg/day	No	Yes	Yes	Yes	Yes		168
			Refusal of the subject to continue treatment or observations.	15_020			0	No	120	23.5294	15	Early Termination	65	Female	30NOV16	272	MF4637	<250 mg/day	No	No	>=250 mg/day	No	Yes	Yes	Yes	Yes		84
				15_021			4	Yes	211	97.619	15	Entered	41	Male	02DEC16	273	Placebo	<250 mg/day	No	No	>=250 mg/day	No	Yes	Yes	Yes	Yes		167
				15_022			6	Yes	218	77.2549	15	Entered	48	Male	09DEC16	274	Placebo	<250 mg/day	No	No	<250 mg/day	No	Yes	Yes	Yes	Yes		167
				15_023			4	Yes	274	48.2353	15	Entered	58	Female	06DEC16	275	MF4637	<250 mg/day	No	No	>=250 mg/day	No	Yes	Yes	Yes	Yes		176
				15_024				No	3		15	Screen Failure	74	Female							<250 mg/day	Yes	No	No	No	No
				15_025				No	1		15	Screen Failure	69	Female								Yes	No	No	No	No
				15_026				No	1		15	Screen Failure	70	Female							>=250 mg/day	Yes	No	No	No	No
			Refusal of the subject to continue treatment or observations.	16_001			0	No	193	100	16	Early Termination	53	Male	31OCT16	152	Placebo	<250 mg/day	No	No	<250 mg/day	No	Yes	Yes	Yes	Yes		84
			Refusal of the subject to continue treatment or observations.	16_002			3	No	194	100	16	Early Termination	53	Male	03NOV16	154	MF4637	<250 mg/day	No	No	<250 mg/day	No	Yes	Yes	Yes	Yes		81
				16_003			0	Yes	207	97.9048	16	Entered	59	Male	03NOV16	153	Placebo	>=250 mg/day	No	No	>=250 mg/day	No	Yes	Yes	Yes	Yes		174
				16_004				No	1		16	Screen Failure	50	Male								Yes	No	No	No	No
				16_005			7	Yes	200	100	16	Entered	60	Male	12NOV16	155	MF4637	<250 mg/day	No	No	<250 mg/day	No	Yes	Yes	Yes	Yes		167
				16_006				No	1		16	Screen Failure	57	Female								Yes	No	No	No	No
				16_007			11	Yes	188	100	16	Entered	57	Female	28NOV16	156	Placebo	>=250 mg/day	No	No	>=250 mg/day	No	Yes	Yes	Yes	Yes		163
				16_008			8	Yes	201	95.5556	16	Entered	58	Female	18NOV16	158	MF4637	>=250 mg/day	No	No	>=250 mg/day	No	Yes	Yes	Yes	Yes		174
				17_001			1	Yes	212	100	17	Entered	71	Male	08NOV16	212	Placebo	<250 mg/day	No	No	<250 mg/day	No	Yes	Yes	Yes	Yes		169
				17_002			1	Yes	211	100	17	Entered	70	Female	10NOV16	192	MF4637	<250 mg/day	Yes	No	<250 mg/day	No	Yes	Yes	Yes	Yes		167
				17_003			1	Yes	212	100	17	Entered	62	Female	10NOV16	193	MF4637	>=250 mg/day	Yes	No	<250 mg/day	No	Yes	Yes	Yes	Yes		169
		Subject change his mind and refused to continued on Study.	Refusal of the subject to continue treatment or observations.	17_004				No	1		17	Screen Failure	65	Male							<250 mg/day	Yes	No	No	No	No
				17_005			0	Yes	210	100	17	Entered	65	Female	16NOV16	213	MF4637	<250 mg/day	No	No	<250 mg/day	No	Yes	Yes	Yes	Yes		167
				17_006			1	Yes	212	100	17	Entered	61	Female	21NOV16	194	Placebo	<250 mg/day	No	No	<250 mg/day	No	Yes	Yes	Yes	Yes		169
				17_007			1	Yes	212	100	17	Entered	61	Male	21NOV16	214	MF4637	<250 mg/day	No	No	<250 mg/day	No	Yes	Yes	Yes	Yes		168
				17_008			1	Yes	211	42.9142	17	Entered	67	Female	25NOV16	195	Placebo	<250 mg/day	Yes	No	<250 mg/day	No	Yes	Yes	Yes	Yes		167
				17_009			1	Yes	211	100	17	Entered	70	Male	25NOV16	215	Placebo	<250 mg/day	No	No	<250 mg/day	No	Yes	Yes	Yes	Yes		167
				17_010			1	Yes	211	100	17	Entered	68	Female	25NOV16	230	MF4637	<250 mg/day	No	No	<250 mg/day	No	Yes	Yes	Yes	Yes		169
		subject chage her mind after visit 1	Refusal of the subject to continue treatment or observations.	17_011				No	1		17	Screen Failure	58	Female							<250 mg/day	Yes	No	No	No	No
				18_001			3	Yes	204	97.3485	18	Entered	46	Female	18OCT16	220	Placebo	<250 mg/day	No	No	<250 mg/day	No	Yes	Yes	Yes	Yes		172
				18_002			1	Yes	203	97.619	18	Entered	52	Female	24OCT16	222	MF4637	<250 mg/day	No	No	<250 mg/day	No	Yes	Yes	Yes	Yes		167
				18_003			5	Yes	203	95.6349	18	Entered	55	Female	26OCT16	221	Placebo	>=250 mg/day	Yes	Yes	>=250 mg/day	No	Yes	Yes	Yes	Yes		168
				19_001			2	Yes	211	100	19	Entered	53	Female	28OCT16	225	Placebo	<250 mg/day	No	No	>=250 mg/day	No	Yes	Yes	Yes	Yes		171
				19_002			6	Yes	206	100	19	Entered	37	Male	27OCT16	224	MF4637	<250 mg/day	No	No	<250 mg/day	No	Yes	Yes	Yes	Yes		167
				19_003				No	1		19	Screen Failure	59	Female							>=250 mg/day	Yes	No	No	No	No
				19_004			6	Yes	211	100	19	Entered	53	Female	04NOV16	226	MF4637	<250 mg/day	No	No	>=250 mg/day	No	Yes	Yes	Yes	Yes		168
				19_005			5	Yes	211	100	19	Entered	51	Male	04NOV16	227	Placebo	<250 mg/day	No	No	<250 mg/day	No	Yes	Yes	Yes	Yes		168
				19_006				No	1		19	Screen Failure	73	Male							<250 mg/day	Yes	No	No	No	No
				19_007			6	Yes	208	100	19	Entered	50	Male	21NOV16	289	MF4637	<250 mg/day	No	No	>=250 mg/day	No	Yes	Yes	Yes	Yes		168
				19_008				No	1		19	Screen Failure	65	Female							>=250 mg/day	Yes	No	No	No	No
				19_009			6	Yes	208	100	19	Entered	49	Female	21NOV16	290	Placebo	<250 mg/day	No	No	>=250 mg/day	No	Yes	Yes	Yes	Yes		168
				19_010			6	Yes	207	100	19	Entered	33	Male	21NOV16	291	MF4637	<250 mg/day	No	No	>=250 mg/day	No	Yes	Yes	Yes	Yes		168
				19_011				No	1		19	Screen Failure	72	Female							>=250 mg/day	Yes	No	No	No	No
				19_012			9	Yes	201	100	19	Entered	55	Female	21NOV16	288	Placebo	<250 mg/day	Yes	No	>=250 mg/day	No	Yes	Yes	Yes	Yes		162
				19_013				No	1		19	Screen Failure	65	Female							>=250 mg/day	Yes	No	No	No	No
