# Supplementary material for: Evaluation of a High Concentrate Omega-3 for Correcting the Omega-3 Fatty Acid Nutritional Deficiency in Non-alcoholic Fatty Liver Disease and effects on Hepatic Steatosis (CONDIN)
Source: Preprints.org preprint supplement (doi:10.20944/preprints201807.0240.v1), 2018-07-13
Supplement: Supplementary file 6 [file EC.xlsx]

## Sheet: EC
Q6_COM	Q7_COM	TPEX	COMMENT	Q3	Q4	Q5	SUBJID	VISIT	DOSETKN	WEEK	DAY	DOSEDAT	Q1	Q2	Q6	Q7	Q8	Q8B	VISITNUM	SITE	STATUS	AGE	SEX	FIRSTDT	RANDNO	TREAT	OMEGA	DIABETE	STATIN	OMEGA_C	SFFL	SAFETY	ITT	MITT	PP
I have started baking or slow cooking in a crock pot all the meats that I eat		walking			2	2	02_001	Visit 3	Yes	1	0	27OCT15	0 (not at all) (if 0, skip questions 2 and 3)		Yes	No	30 or more minutes / day	Moderate	Week 6	02	Entered	57	Female	27OCT15	108	MF4637	<250 mg/day	Yes	Yes	<250 mg/day	No	Yes	Yes	Yes	Yes
I have started baking or slow cooking in a crock pot all the meats that I eat		walking			2	2	02_001	Visit 3	Yes	1	1	28OCT15	0 (not at all) (if 0, skip questions 2 and 3)		Yes	No	30 or more minutes / day	Moderate	Week 6	02	Entered	57	Female	27OCT15	108	MF4637	<250 mg/day	Yes	Yes	<250 mg/day	No	Yes	Yes	Yes	Yes
I have started baking or slow cooking in a crock pot all the meats that I eat		walking			2	2	02_001	Visit 3	Yes	1	2	29OCT15	0 (not at all) (if 0, skip questions 2 and 3)		Yes	No	30 or more minutes / day	Moderate	Week 6	02	Entered	57	Female	27OCT15	108	MF4637	<250 mg/day	Yes	Yes	<250 mg/day	No	Yes	Yes	Yes	Yes
I have started baking or slow cooking in a crock pot all the meats that I eat		walking			2	2	02_001	Visit 3	Yes	1	3	30OCT15	0 (not at all) (if 0, skip questions 2 and 3)		Yes	No	30 or more minutes / day	Moderate	Week 6	02	Entered	57	Female	27OCT15	108	MF4637	<250 mg/day	Yes	Yes	<250 mg/day	No	Yes	Yes	Yes	Yes
I have started baking or slow cooking in a crock pot all the meats that I eat		walking			2	2	02_001	Visit 3	Yes	1	4	31OCT15	0 (not at all) (if 0, skip questions 2 and 3)		Yes	No	30 or more minutes / day	Moderate	Week 6	02	Entered	57	Female	27OCT15	108	MF4637	<250 mg/day	Yes	Yes	<250 mg/day	No	Yes	Yes	Yes	Yes
I have started baking or slow cooking in a crock pot all the meats that I eat		walking			2	2	02_001	Visit 3	Yes	1	5	01NOV15	0 (not at all) (if 0, skip questions 2 and 3)		Yes	No	30 or more minutes / day	Moderate	Week 6	02	Entered	57	Female	27OCT15	108	MF4637	<250 mg/day	Yes	Yes	<250 mg/day	No	Yes	Yes	Yes	Yes
I have started baking or slow cooking in a crock pot all the meats that I eat		walking			2	2	02_001	Visit 3	Yes	1	6	02NOV15	0 (not at all) (if 0, skip questions 2 and 3)		Yes	No	30 or more minutes / day	Moderate	Week 6	02	Entered	57	Female	27OCT15	108	MF4637	<250 mg/day	Yes	Yes	<250 mg/day	No	Yes	Yes	Yes	Yes
		stand walking in front of tv		baked flounder	1	nuts-5	02_001	Visit 3	Yes	2	7	02NOV15	1 time	2 to 7 ounces or about 1 fillet or 4-14 pieces of sushi	No	No	< 30 minutes / day	Light	Week 6	02	Entered	57	Female	27OCT15	108	MF4637	<250 mg/day	Yes	Yes	<250 mg/day	No	Yes	Yes	Yes	Yes
		stand walking in front of tv		baked flounder	1	nuts-5	02_001	Visit 3	Yes	2	8	03NOV15	1 time	2 to 7 ounces or about 1 fillet or 4-14 pieces of sushi	No	No	< 30 minutes / day	Light	Week 6	02	Entered	57	Female	27OCT15	108	MF4637	<250 mg/day	Yes	Yes	<250 mg/day	No	Yes	Yes	Yes	Yes
		stand walking in front of tv		baked flounder	1	nuts-5	02_001	Visit 3	Yes	2	9	04NOV15	1 time	2 to 7 ounces or about 1 fillet or 4-14 pieces of sushi	No	No	< 30 minutes / day	Light	Week 6	02	Entered	57	Female	27OCT15	108	MF4637	<250 mg/day	Yes	Yes	<250 mg/day	No	Yes	Yes	Yes	Yes
		stand walking in front of tv		baked flounder	1	nuts-5	02_001	Visit 3	Yes	2	10	05NOV15	1 time	2 to 7 ounces or about 1 fillet or 4-14 pieces of sushi	No	No	< 30 minutes / day	Light	Week 6	02	Entered	57	Female	27OCT15	108	MF4637	<250 mg/day	Yes	Yes	<250 mg/day	No	Yes	Yes	Yes	Yes
		stand walking in front of tv		baked flounder	1	nuts-5	02_001	Visit 3	Yes	2	11	06NOV15	1 time	2 to 7 ounces or about 1 fillet or 4-14 pieces of sushi	No	No	< 30 minutes / day	Light	Week 6	02	Entered	57	Female	27OCT15	108	MF4637	<250 mg/day	Yes	Yes	<250 mg/day	No	Yes	Yes	Yes	Yes
		stand walking in front of tv		baked flounder	1	nuts-5	02_001	Visit 3	Yes	2	12	07NOV15	1 time	2 to 7 ounces or about 1 fillet or 4-14 pieces of sushi	No	No	< 30 minutes / day	Light	Week 6	02	Entered	57	Female	27OCT15	108	MF4637	<250 mg/day	Yes	Yes	<250 mg/day	No	Yes	Yes	Yes	Yes
		stand walking in front of tv		baked flounder	1	nuts-5	02_001	Visit 3	Yes	2	13	08NOV15	1 time	2 to 7 ounces or about 1 fillet or 4-14 pieces of sushi	No	No	< 30 minutes / day	Light	Week 6	02	Entered	57	Female	27OCT15	108	MF4637	<250 mg/day	Yes	Yes	<250 mg/day	No	Yes	Yes	Yes	Yes
		walking in place		homemade tuna salad	1	2	02_001	Visit 3	Yes	3	14	10NOV15	1 time	2 to 7 ounces or about 1 fillet or 4-14 pieces of sushi	No	No	< 30 minutes / day	Light	Week 6	02	Entered	57	Female	27OCT15	108	MF4637	<250 mg/day	Yes	Yes	<250 mg/day	No	Yes	Yes	Yes	Yes
		walking in place		homemade tuna salad	1	2	02_001	Visit 3	Yes	3	15	11NOV15	1 time	2 to 7 ounces or about 1 fillet or 4-14 pieces of sushi	No	No	< 30 minutes / day	Light	Week 6	02	Entered	57	Female	27OCT15	108	MF4637	<250 mg/day	Yes	Yes	<250 mg/day	No	Yes	Yes	Yes	Yes
		walking in place		homemade tuna salad	1	2	02_001	Visit 3	Yes	3	16	12NOV15	1 time	2 to 7 ounces or about 1 fillet or 4-14 pieces of sushi	No	No	< 30 minutes / day	Light	Week 6	02	Entered	57	Female	27OCT15	108	MF4637	<250 mg/day	Yes	Yes	<250 mg/day	No	Yes	Yes	Yes	Yes
		walking in place		homemade tuna salad	1	2	02_001	Visit 3	Yes	3	17	13NOV15	1 time	2 to 7 ounces or about 1 fillet or 4-14 pieces of sushi	No	No	< 30 minutes / day	Light	Week 6	02	Entered	57	Female	27OCT15	108	MF4637	<250 mg/day	Yes	Yes	<250 mg/day	No	Yes	Yes	Yes	Yes
		walking in place		homemade tuna salad	1	2	02_001	Visit 3	Yes	3	18	14NOV15	1 time	2 to 7 ounces or about 1 fillet or 4-14 pieces of sushi	No	No	< 30 minutes / day	Light	Week 6	02	Entered	57	Female	27OCT15	108	MF4637	<250 mg/day	Yes	Yes	<250 mg/day	No	Yes	Yes	Yes	Yes
		walking in place		homemade tuna salad	1	2	02_001	Visit 3	Yes	3	19	15NOV15	1 time	2 to 7 ounces or about 1 fillet or 4-14 pieces of sushi	No	No	< 30 minutes / day	Light	Week 6	02	Entered	57	Female	27OCT15	108	MF4637	<250 mg/day	Yes	Yes	<250 mg/day	No	Yes	Yes	Yes	Yes
		walking in place		homemade tuna salad	1	2	02_001	Visit 3	Yes	3	20	16NOV15	1 time	2 to 7 ounces or about 1 fillet or 4-14 pieces of sushi	No	No	< 30 minutes / day	Light	Week 6	02	Entered	57	Female	27OCT15	108	MF4637	<250 mg/day	Yes	Yes	<250 mg/day	No	Yes	Yes	Yes	Yes
eat only 1 to 2 pieces of bread instead of 5 or 6		Walking		baked flounder	1	0	02_001	Visit 3	Yes	4	21	17NOV15	1 time	2 to 7 ounces or about 1 fillet or 4-14 pieces of sushi	Yes	No	< 30 minutes / day	Light	Week 6	02	Entered	57	Female	27OCT15	108	MF4637	<250 mg/day	Yes	Yes	<250 mg/day	No	Yes	Yes	Yes	Yes
eat only 1 to 2 pieces of bread instead of 5 or 6		Walking		baked flounder	1	0	02_001	Visit 3	Yes	4	22	18NOV15	1 time	2 to 7 ounces or about 1 fillet or 4-14 pieces of sushi	Yes	No	< 30 minutes / day	Light	Week 6	02	Entered	57	Female	27OCT15	108	MF4637	<250 mg/day	Yes	Yes	<250 mg/day	No	Yes	Yes	Yes	Yes
eat only 1 to 2 pieces of bread instead of 5 or 6		Walking		baked flounder	1	0	02_001	Visit 3	Yes	4	23	19NOV15	1 time	2 to 7 ounces or about 1 fillet or 4-14 pieces of sushi	Yes	No	< 30 minutes / day	Light	Week 6	02	Entered	57	Female	27OCT15	108	MF4637	<250 mg/day	Yes	Yes	<250 mg/day	No	Yes	Yes	Yes	Yes
eat only 1 to 2 pieces of bread instead of 5 or 6		Walking		baked flounder	1	0	02_001	Visit 3	Yes	4	24	20NOV15	1 time	2 to 7 ounces or about 1 fillet or 4-14 pieces of sushi	Yes	No	< 30 minutes / day	Light	Week 6	02	Entered	57	Female	27OCT15	108	MF4637	<250 mg/day	Yes	Yes	<250 mg/day	No	Yes	Yes	Yes	Yes
eat only 1 to 2 pieces of bread instead of 5 or 6		Walking		baked flounder	1	0	02_001	Visit 3	Yes	4	25	21NOV15	1 time	2 to 7 ounces or about 1 fillet or 4-14 pieces of sushi	Yes	No	< 30 minutes / day	Light	Week 6	02	Entered	57	Female	27OCT15	108	MF4637	<250 mg/day	Yes	Yes	<250 mg/day	No	Yes	Yes	Yes	Yes
eat only 1 to 2 pieces of bread instead of 5 or 6		Walking		baked flounder	1	0	02_001	Visit 3	Yes	4	26	22NOV15	1 time	2 to 7 ounces or about 1 fillet or 4-14 pieces of sushi	Yes	No	< 30 minutes / day	Light	Week 6	02	Entered	57	Female	27OCT15	108	MF4637	<250 mg/day	Yes	Yes	<250 mg/day	No	Yes	Yes	Yes	Yes
eat only 1 to 2 pieces of bread instead of 5 or 6		Walking		baked flounder	1	0	02_001	Visit 3	Yes	4	27	23NOV15	1 time	2 to 7 ounces or about 1 fillet or 4-14 pieces of sushi	Yes	No	< 30 minutes / day	Light	Week 6	02	Entered	57	Female	27OCT15	108	MF4637	<250 mg/day	Yes	Yes	<250 mg/day	No	Yes	Yes	Yes	Yes
		walking in place		baked flounder	1	2	02_001	Visit 3	Yes	5	28	24DEC15	1 time	2 to 7 ounces or about 1 fillet or 4-14 pieces of sushi	No	No	< 30 minutes / day	Light	Week 6	02	Entered	57	Female	27OCT15	108	MF4637	<250 mg/day	Yes	Yes	<250 mg/day	No	Yes	Yes	Yes	Yes
		walking in place		baked flounder	1	2	02_001	Visit 3	Yes	5	29	25DEC15	1 time	2 to 7 ounces or about 1 fillet or 4-14 pieces of sushi	No	No	< 30 minutes / day	Light	Week 6	02	Entered	57	Female	27OCT15	108	MF4637	<250 mg/day	Yes	Yes	<250 mg/day	No	Yes	Yes	Yes	Yes
		walking in place		baked flounder	1	2	02_001	Visit 3	Yes	5	30	26DEC15	1 time	2 to 7 ounces or about 1 fillet or 4-14 pieces of sushi	No	No	< 30 minutes / day	Light	Week 6	02	Entered	57	Female	27OCT15	108	MF4637	<250 mg/day	Yes	Yes	<250 mg/day	No	Yes	Yes	Yes	Yes
		walking in place		baked flounder	1	2	02_001	Visit 3	Yes	5	31	27DEC15	1 time	2 to 7 ounces or about 1 fillet or 4-14 pieces of sushi	No	No	< 30 minutes / day	Light	Week 6	02	Entered	57	Female	27OCT15	108	MF4637	<250 mg/day	Yes	Yes	<250 mg/day	No	Yes	Yes	Yes	Yes
		walking in place		baked flounder	1	2	02_001	Visit 3	Yes	5	32	28DEC15	1 time	2 to 7 ounces or about 1 fillet or 4-14 pieces of sushi	No	No	< 30 minutes / day	Light	Week 6	02	Entered	57	Female	27OCT15	108	MF4637	<250 mg/day	Yes	Yes	<250 mg/day	No	Yes	Yes	Yes	Yes
		walking in place		baked flounder	1	2	02_001	Visit 3	Yes	5	33	29DEC15	1 time	2 to 7 ounces or about 1 fillet or 4-14 pieces of sushi	No	No	< 30 minutes / day	Light	Week 6	02	Entered	57	Female	27OCT15	108	MF4637	<250 mg/day	Yes	Yes	<250 mg/day	No	Yes	Yes	Yes	Yes
		walking in place		baked flounder	1	2	02_001	Visit 3	Yes	5	34	30DEC15	1 time	2 to 7 ounces or about 1 fillet or 4-14 pieces of sushi	No	No	< 30 minutes / day	Light	Week 6	02	Entered	57	Female	27OCT15	108	MF4637	<250 mg/day	Yes	Yes	<250 mg/day	No	Yes	Yes	Yes	Yes
		stand walking		homemade tuna salad	1	2	02_001	Visit 3	Yes	6	35	01DEC15	1 time	2 to 7 ounces or about 1 fillet or 4-14 pieces of sushi	No	No	< 30 minutes / day	Light	Week 6	02	Entered	57	Female	27OCT15	108	MF4637	<250 mg/day	Yes	Yes	<250 mg/day	No	Yes	Yes	Yes	Yes
		stand walking		homemade tuna salad	1	2	02_001	Visit 3	Yes	6	36	02DEC15	1 time	2 to 7 ounces or about 1 fillet or 4-14 pieces of sushi	No	No	< 30 minutes / day	Light	Week 6	02	Entered	57	Female	27OCT15	108	MF4637	<250 mg/day	Yes	Yes	<250 mg/day	No	Yes	Yes	Yes	Yes
		stand walking		homemade tuna salad	1	2	02_001	Visit 3	Yes	6	37	03DEC15	1 time	2 to 7 ounces or about 1 fillet or 4-14 pieces of sushi	No	No	< 30 minutes / day	Light	Week 6	02	Entered	57	Female	27OCT15	108	MF4637	<250 mg/day	Yes	Yes	<250 mg/day	No	Yes	Yes	Yes	Yes
		stand walking		homemade tuna salad	1	2	02_001	Visit 3	Yes	6	38	04DEC15	1 time	2 to 7 ounces or about 1 fillet or 4-14 pieces of sushi	No	No	< 30 minutes / day	Light	Week 6	02	Entered	57	Female	27OCT15	108	MF4637	<250 mg/day	Yes	Yes	<250 mg/day	No	Yes	Yes	Yes	Yes
		stand walking		homemade tuna salad	1	2	02_001	Visit 3	Yes	6	39	05DEC15	1 time	2 to 7 ounces or about 1 fillet or 4-14 pieces of sushi	No	No	< 30 minutes / day	Light	Week 6	02	Entered	57	Female	27OCT15	108	MF4637	<250 mg/day	Yes	Yes	<250 mg/day	No	Yes	Yes	Yes	Yes
		stand walking		homemade tuna salad	1	2	02_001	Visit 3	Yes	6	40	06DEC15	1 time	2 to 7 ounces or about 1 fillet or 4-14 pieces of sushi	No	No	< 30 minutes / day	Light	Week 6	02	Entered	57	Female	27OCT15	108	MF4637	<250 mg/day	Yes	Yes	<250 mg/day	No	Yes	Yes	Yes	Yes
		stand walking		homemade tuna salad	1	2	02_001	Visit 3	Yes	6	41	07DEC15	1 time	2 to 7 ounces or about 1 fillet or 4-14 pieces of sushi	No	No	< 30 minutes / day	Light	Week 6	02	Entered	57	Female	27OCT15	108	MF4637	<250 mg/day	Yes	Yes	<250 mg/day	No	Yes	Yes	Yes	Yes
		walking		Tuna	0	twice	02_001	Visit 4	Yes	7	42	08DEC15	1 time	Less than 2 ounces or less than one fillet or less than 4 pieces of sushi	No	No	< 30 minutes / day	Light	Week 12	02	Entered	57	Female	27OCT15	108	MF4637	<250 mg/day	Yes	Yes	<250 mg/day	No	Yes	Yes	Yes	Yes
		walking		Tuna	0	twice	02_001	Visit 4	Yes	7	43	09DEC15	1 time	Less than 2 ounces or less than one fillet or less than 4 pieces of sushi	No	No	< 30 minutes / day	Light	Week 12	02	Entered	57	Female	27OCT15	108	MF4637	<250 mg/day	Yes	Yes	<250 mg/day	No	Yes	Yes	Yes	Yes
		walking		Tuna	0	twice	02_001	Visit 4	Yes	7	44	10DEC15	1 time	Less than 2 ounces or less than one fillet or less than 4 pieces of sushi	No	No	< 30 minutes / day	Light	Week 12	02	Entered	57	Female	27OCT15	108	MF4637	<250 mg/day	Yes	Yes	<250 mg/day	No	Yes	Yes	Yes	Yes
		walking		Tuna	0	twice	02_001	Visit 4	Yes	7	45	11DEC15	1 time	Less than 2 ounces or less than one fillet or less than 4 pieces of sushi	No	No	< 30 minutes / day	Light	Week 12	02	Entered	57	Female	27OCT15	108	MF4637	<250 mg/day	Yes	Yes	<250 mg/day	No	Yes	Yes	Yes	Yes
		walking		Tuna	0	twice	02_001	Visit 4	Yes	7	46	12DEC15	1 time	Less than 2 ounces or less than one fillet or less than 4 pieces of sushi	No	No	< 30 minutes / day	Light	Week 12	02	Entered	57	Female	27OCT15	108	MF4637	<250 mg/day	Yes	Yes	<250 mg/day	No	Yes	Yes	Yes	Yes
		walking		Tuna	0	twice	02_001	Visit 4	Yes	7	47	13DEC15	1 time	Less than 2 ounces or less than one fillet or less than 4 pieces of sushi	No	No	< 30 minutes / day	Light	Week 12	02	Entered	57	Female	27OCT15	108	MF4637	<250 mg/day	Yes	Yes	<250 mg/day	No	Yes	Yes	Yes	Yes
		walking		Tuna	0	twice	02_001	Visit 4	Yes	7	48	14DEC15	1 time	Less than 2 ounces or less than one fillet or less than 4 pieces of sushi	No	No	< 30 minutes / day	Light	Week 12	02	Entered	57	Female	27OCT15	108	MF4637	<250 mg/day	Yes	Yes	<250 mg/day	No	Yes	Yes	Yes	Yes
		stand walking		shrimp	1	2	02_001	Visit 4	Yes	8	49	15DEC15	1 time	2 to 7 ounces or about 1 fillet or 4-14 pieces of sushi	No	No	< 30 minutes / day	Light	Week 12	02	Entered	57	Female	27OCT15	108	MF4637	<250 mg/day	Yes	Yes	<250 mg/day	No	Yes	Yes	Yes	Yes
		stand walking		shrimp	1	2	02_001	Visit 4	Yes	8	50	16DEC15	1 time	2 to 7 ounces or about 1 fillet or 4-14 pieces of sushi	No	No	< 30 minutes / day	Light	Week 12	02	Entered	57	Female	27OCT15	108	MF4637	<250 mg/day	Yes	Yes	<250 mg/day	No	Yes	Yes	Yes	Yes
		stand walking		shrimp	1	2	02_001	Visit 4	Yes	8	51	17DEC15	1 time	2 to 7 ounces or about 1 fillet or 4-14 pieces of sushi	No	No	< 30 minutes / day	Light	Week 12	02	Entered	57	Female	27OCT15	108	MF4637	<250 mg/day	Yes	Yes	<250 mg/day	No	Yes	Yes	Yes	Yes
		stand walking		shrimp	1	2	02_001	Visit 4	Yes	8	52	18DEC15	1 time	2 to 7 ounces or about 1 fillet or 4-14 pieces of sushi	No	No	< 30 minutes / day	Light	Week 12	02	Entered	57	Female	27OCT15	108	MF4637	<250 mg/day	Yes	Yes	<250 mg/day	No	Yes	Yes	Yes	Yes
		stand walking		shrimp	1	2	02_001	Visit 4	Yes	8	53	19DEC15	1 time	2 to 7 ounces or about 1 fillet or 4-14 pieces of sushi	No	No	< 30 minutes / day	Light	Week 12	02	Entered	57	Female	27OCT15	108	MF4637	<250 mg/day	Yes	Yes	<250 mg/day	No	Yes	Yes	Yes	Yes
		stand walking		shrimp	1	2	02_001	Visit 4	Yes	8	54	20DEC15	1 time	2 to 7 ounces or about 1 fillet or 4-14 pieces of sushi	No	No	< 30 minutes / day	Light	Week 12	02	Entered	57	Female	27OCT15	108	MF4637	<250 mg/day	Yes	Yes	<250 mg/day	No	Yes	Yes	Yes	Yes
		stand walking		shrimp	1	2	02_001	Visit 4	Yes	8	55	21DEC15	1 time	2 to 7 ounces or about 1 fillet or 4-14 pieces of sushi	No	No	< 30 minutes / day	Light	Week 12	02	Entered	57	Female	27OCT15	108	MF4637	<250 mg/day	Yes	Yes	<250 mg/day	No	Yes	Yes	Yes	Yes
		walking			0	1	02_001	Visit 4	Yes	9	56	22DEC15	0 (not at all) (if 0, skip questions 2 and 3)		No	No	< 30 minutes / day	Light	Week 12	02	Entered	57	Female	27OCT15	108	MF4637	<250 mg/day	Yes	Yes	<250 mg/day	No	Yes	Yes	Yes	Yes
		walking			0	1	02_001	Visit 4	Yes	9	57	23DEC15	0 (not at all) (if 0, skip questions 2 and 3)		No	No	< 30 minutes / day	Light	Week 12	02	Entered	57	Female	27OCT15	108	MF4637	<250 mg/day	Yes	Yes	<250 mg/day	No	Yes	Yes	Yes	Yes
		walking			0	1	02_001	Visit 4	Yes	9	58	24DEC15	0 (not at all) (if 0, skip questions 2 and 3)		No	No	< 30 minutes / day	Light	Week 12	02	Entered	57	Female	27OCT15	108	MF4637	<250 mg/day	Yes	Yes	<250 mg/day	No	Yes	Yes	Yes	Yes
		walking			0	1	02_001	Visit 4	Yes	9	59	25DEC15	0 (not at all) (if 0, skip questions 2 and 3)		No	No	< 30 minutes / day	Light	Week 12	02	Entered	57	Female	27OCT15	108	MF4637	<250 mg/day	Yes	Yes	<250 mg/day	No	Yes	Yes	Yes	Yes
		walking			0	1	02_001	Visit 4	Yes	9	60	26DEC15	0 (not at all) (if 0, skip questions 2 and 3)		No	No	< 30 minutes / day	Light	Week 12	02	Entered	57	Female	27OCT15	108	MF4637	<250 mg/day	Yes	Yes	<250 mg/day	No	Yes	Yes	Yes	Yes
		walking			0	1	02_001	Visit 4	Yes	9	61	27DEC15	0 (not at all) (if 0, skip questions 2 and 3)		No	No	< 30 minutes / day	Light	Week 12	02	Entered	57	Female	27OCT15	108	MF4637	<250 mg/day	Yes	Yes	<250 mg/day	No	Yes	Yes	Yes	Yes
		walking			0	1	02_001	Visit 4	Yes	9	62	28DEC15	0 (not at all) (if 0, skip questions 2 and 3)		No	No	< 30 minutes / day	Light	Week 12	02	Entered	57	Female	27OCT15	108	MF4637	<250 mg/day	Yes	Yes	<250 mg/day	No	Yes	Yes	Yes	Yes
		walking		shrimp	0	0	02_001	Visit 4	Yes	10	63	29DEC15	1 time	Less than 2 ounces or less than one fillet or less than 4 pieces of sushi	No	No	< 30 minutes / day	Light	Week 12	02	Entered	57	Female	27OCT15	108	MF4637	<250 mg/day	Yes	Yes	<250 mg/day	No	Yes	Yes	Yes	Yes
		walking		shrimp	0	0	02_001	Visit 4	Yes	10	64	30DEC15	1 time	Less than 2 ounces or less than one fillet or less than 4 pieces of sushi	No	No	< 30 minutes / day	Light	Week 12	02	Entered	57	Female	27OCT15	108	MF4637	<250 mg/day	Yes	Yes	<250 mg/day	No	Yes	Yes	Yes	Yes
		walking		shrimp	0	0	02_001	Visit 4	Yes	10	65	31DEC15	1 time	Less than 2 ounces or less than one fillet or less than 4 pieces of sushi	No	No	< 30 minutes / day	Light	Week 12	02	Entered	57	Female	27OCT15	108	MF4637	<250 mg/day	Yes	Yes	<250 mg/day	No	Yes	Yes	Yes	Yes
		walking		shrimp	0	0	02_001	Visit 4	Yes	10	66	01JAN16	1 time	Less than 2 ounces or less than one fillet or less than 4 pieces of sushi	No	No	< 30 minutes / day	Light	Week 12	02	Entered	57	Female	27OCT15	108	MF4637	<250 mg/day	Yes	Yes	<250 mg/day	No	Yes	Yes	Yes	Yes
		walking		shrimp	0	0	02_001	Visit 4	Yes	10	67	02JAN16	1 time	Less than 2 ounces or less than one fillet or less than 4 pieces of sushi	No	No	< 30 minutes / day	Light	Week 12	02	Entered	57	Female	27OCT15	108	MF4637	<250 mg/day	Yes	Yes	<250 mg/day	No	Yes	Yes	Yes	Yes
		walking		shrimp	0	0	02_001	Visit 4	Yes	10	68	03JAN16	1 time	Less than 2 ounces or less than one fillet or less than 4 pieces of sushi	No	No	< 30 minutes / day	Light	Week 12	02	Entered	57	Female	27OCT15	108	MF4637	<250 mg/day	Yes	Yes	<250 mg/day	No	Yes	Yes	Yes	Yes
		walking		shrimp	0	0	02_001	Visit 4	Yes	10	69	04JAN16	1 time	Less than 2 ounces or less than one fillet or less than 4 pieces of sushi	No	No	< 30 minutes / day	Light	Week 12	02	Entered	57	Female	27OCT15	108	MF4637	<250 mg/day	Yes	Yes	<250 mg/day	No	Yes	Yes	Yes	Yes
		Walking			1	2	02_001	Visit 4	Yes	11	70	05JAN16	0 (not at all) (if 0, skip questions 2 and 3)		No	No	< 30 minutes / day	Light	Week 12	02	Entered	57	Female	27OCT15	108	MF4637	<250 mg/day	Yes	Yes	<250 mg/day	No	Yes	Yes	Yes	Yes
		Walking			1	2	02_001	Visit 4	Yes	11	71	06JAN16	0 (not at all) (if 0, skip questions 2 and 3)		No	No	< 30 minutes / day	Light	Week 12	02	Entered	57	Female	27OCT15	108	MF4637	<250 mg/day	Yes	Yes	<250 mg/day	No	Yes	Yes	Yes	Yes
		Walking			1	2	02_001	Visit 4	Yes	11	72	07JAN16	0 (not at all) (if 0, skip questions 2 and 3)		No	No	< 30 minutes / day	Light	Week 12	02	Entered	57	Female	27OCT15	108	MF4637	<250 mg/day	Yes	Yes	<250 mg/day	No	Yes	Yes	Yes	Yes
		Walking			1	2	02_001	Visit 4	Yes	11	73	08JAN16	0 (not at all) (if 0, skip questions 2 and 3)		No	No	< 30 minutes / day	Light	Week 12	02	Entered	57	Female	27OCT15	108	MF4637	<250 mg/day	Yes	Yes	<250 mg/day	No	Yes	Yes	Yes	Yes
		Walking			1	2	02_001	Visit 4	Yes	11	74	09JAN16	0 (not at all) (if 0, skip questions 2 and 3)		No	No	< 30 minutes / day	Light	Week 12	02	Entered	57	Female	27OCT15	108	MF4637	<250 mg/day	Yes	Yes	<250 mg/day	No	Yes	Yes	Yes	Yes
		Walking			1	2	02_001	Visit 4	Yes	11	75	10JAN16	0 (not at all) (if 0, skip questions 2 and 3)		No	No	< 30 minutes / day	Light	Week 12	02	Entered	57	Female	27OCT15	108	MF4637	<250 mg/day	Yes	Yes	<250 mg/day	No	Yes	Yes	Yes	Yes
		Walking			1	2	02_001	Visit 4	Yes	11	76	11JAN16	0 (not at all) (if 0, skip questions 2 and 3)		No	No	< 30 minutes / day	Light	Week 12	02	Entered	57	Female	27OCT15	108	MF4637	<250 mg/day	Yes	Yes	<250 mg/day	No	Yes	Yes	Yes	Yes
		walking			1	0	02_001	Visit 4	Yes	12	77	12JAN16	0 (not at all) (if 0, skip questions 2 and 3)		No	No	< 30 minutes / day	Light	Week 12	02	Entered	57	Female	27OCT15	108	MF4637	<250 mg/day	Yes	Yes	<250 mg/day	No	Yes	Yes	Yes	Yes
		walking			1	0	02_001	Visit 4	Yes	12	78	13JAN16	0 (not at all) (if 0, skip questions 2 and 3)		No	No	< 30 minutes / day	Light	Week 12	02	Entered	57	Female	27OCT15	108	MF4637	<250 mg/day	Yes	Yes	<250 mg/day	No	Yes	Yes	Yes	Yes
		walking			1	0	02_001	Visit 4	Yes	12	79	14JAN16	0 (not at all) (if 0, skip questions 2 and 3)		No	No	< 30 minutes / day	Light	Week 12	02	Entered	57	Female	27OCT15	108	MF4637	<250 mg/day	Yes	Yes	<250 mg/day	No	Yes	Yes	Yes	Yes
		walking			1	0	02_001	Visit 4	Yes	12	80	15JAN16	0 (not at all) (if 0, skip questions 2 and 3)		No	No	< 30 minutes / day	Light	Week 12	02	Entered	57	Female	27OCT15	108	MF4637	<250 mg/day	Yes	Yes	<250 mg/day	No	Yes	Yes	Yes	Yes
		walking			1	0	02_001	Visit 4	Yes	12	81	16JAN16	0 (not at all) (if 0, skip questions 2 and 3)		No	No	< 30 minutes / day	Light	Week 12	02	Entered	57	Female	27OCT15	108	MF4637	<250 mg/day	Yes	Yes	<250 mg/day	No	Yes	Yes	Yes	Yes
		walking			1	0	02_001	Visit 4	Yes	12	82	17JAN16	0 (not at all) (if 0, skip questions 2 and 3)		No	No	< 30 minutes / day	Light	Week 12	02	Entered	57	Female	27OCT15	108	MF4637	<250 mg/day	Yes	Yes	<250 mg/day	No	Yes	Yes	Yes	Yes
		walking			1	0	02_001	Visit 4	Yes	12	83	18JAN16	0 (not at all) (if 0, skip questions 2 and 3)		No	No	< 30 minutes / day	Light	Week 12	02	Entered	57	Female	27OCT15	108	MF4637	<250 mg/day	Yes	Yes	<250 mg/day	No	Yes	Yes	Yes	Yes
		Walking		shrimp	1	2	02_001	Visit 5	Yes	13	84	19JAN16	1 time	2 to 7 ounces or about 1 fillet or 4-14 pieces of sushi	No	No	30 or more minutes / day	Light	Week 24	02	Entered	57	Female	27OCT15	108	MF4637	<250 mg/day	Yes	Yes	<250 mg/day	No	Yes	Yes	Yes	Yes
		Walking		shrimp	1	2	02_001	Visit 5	Yes	13	85	20JAN16	1 time	2 to 7 ounces or about 1 fillet or 4-14 pieces of sushi	No	No	30 or more minutes / day	Light	Week 24	02	Entered	57	Female	27OCT15	108	MF4637	<250 mg/day	Yes	Yes	<250 mg/day	No	Yes	Yes	Yes	Yes
		Walking		shrimp	1	2	02_001	Visit 5	Yes	13	86	21JAN16	1 time	2 to 7 ounces or about 1 fillet or 4-14 pieces of sushi	No	No	30 or more minutes / day	Light	Week 24	02	Entered	57	Female	27OCT15	108	MF4637	<250 mg/day	Yes	Yes	<250 mg/day	No	Yes	Yes	Yes	Yes
		Walking		shrimp	1	2	02_001	Visit 5	Yes	13	87	22JAN16	1 time	2 to 7 ounces or about 1 fillet or 4-14 pieces of sushi	No	No	30 or more minutes / day	Light	Week 24	02	Entered	57	Female	27OCT15	108	MF4637	<250 mg/day	Yes	Yes	<250 mg/day	No	Yes	Yes	Yes	Yes
		Walking		shrimp	1	2	02_001	Visit 5	Yes	13	88	23JAN16	1 time	2 to 7 ounces or about 1 fillet or 4-14 pieces of sushi	No	No	30 or more minutes / day	Light	Week 24	02	Entered	57	Female	27OCT15	108	MF4637	<250 mg/day	Yes	Yes	<250 mg/day	No	Yes	Yes	Yes	Yes
		Walking		shrimp	1	2	02_001	Visit 5	Yes	13	89	24JAN16	1 time	2 to 7 ounces or about 1 fillet or 4-14 pieces of sushi	No	No	30 or more minutes / day	Light	Week 24	02	Entered	57	Female	27OCT15	108	MF4637	<250 mg/day	Yes	Yes	<250 mg/day	No	Yes	Yes	Yes	Yes
		Walking		shrimp	1	2	02_001	Visit 5	Yes	13	90	25JAN16	1 time	2 to 7 ounces or about 1 fillet or 4-14 pieces of sushi	No	No	30 or more minutes / day	Light	Week 24	02	Entered	57	Female	27OCT15	108	MF4637	<250 mg/day	Yes	Yes	<250 mg/day	No	Yes	Yes	Yes	Yes
		Walking		shrimp	1	2	02_001	Visit 5	Yes	14	91	26JAN16	1 time	2 to 7 ounces or about 1 fillet or 4-14 pieces of sushi	No	No	30 or more minutes / day	Light	Week 24	02	Entered	57	Female	27OCT15	108	MF4637	<250 mg/day	Yes	Yes	<250 mg/day	No	Yes	Yes	Yes	Yes
		Walking		shrimp	1	2	02_001	Visit 5	Yes	14	92	27JAN16	1 time	2 to 7 ounces or about 1 fillet or 4-14 pieces of sushi	No	No	30 or more minutes / day	Light	Week 24	02	Entered	57	Female	27OCT15	108	MF4637	<250 mg/day	Yes	Yes	<250 mg/day	No	Yes	Yes	Yes	Yes
		Walking		shrimp	1	2	02_001	Visit 5	Yes	14	93	28JAN16	1 time	2 to 7 ounces or about 1 fillet or 4-14 pieces of sushi	No	No	30 or more minutes / day	Light	Week 24	02	Entered	57	Female	27OCT15	108	MF4637	<250 mg/day	Yes	Yes	<250 mg/day	No	Yes	Yes	Yes	Yes
		Walking		shrimp	1	2	02_001	Visit 5	Yes	14	94	29JAN16	1 time	2 to 7 ounces or about 1 fillet or 4-14 pieces of sushi	No	No	30 or more minutes / day	Light	Week 24	02	Entered	57	Female	27OCT15	108	MF4637	<250 mg/day	Yes	Yes	<250 mg/day	No	Yes	Yes	Yes	Yes
		Walking		shrimp	1	2	02_001	Visit 5	Yes	14	95	30JAN16	1 time	2 to 7 ounces or about 1 fillet or 4-14 pieces of sushi	No	No	30 or more minutes / day	Light	Week 24	02	Entered	57	Female	27OCT15	108	MF4637	<250 mg/day	Yes	Yes	<250 mg/day	No	Yes	Yes	Yes	Yes
		Walking		shrimp	1	2	02_001	Visit 5	Yes	14	96	31JAN16	1 time	2 to 7 ounces or about 1 fillet or 4-14 pieces of sushi	No	No	30 or more minutes / day	Light	Week 24	02	Entered	57	Female	27OCT15	108	MF4637	<250 mg/day	Yes	Yes	<250 mg/day	No	Yes	Yes	Yes	Yes
		Walking		shrimp	1	2	02_001	Visit 5	Yes	14	97	01FEB16	1 time	2 to 7 ounces or about 1 fillet or 4-14 pieces of sushi	No	No	30 or more minutes / day	Light	Week 24	02	Entered	57	Female	27OCT15	108	MF4637	<250 mg/day	Yes	Yes	<250 mg/day	No	Yes	Yes	Yes	Yes
		walking		shrimp	2	5 nuts	02_001	Visit 5	Yes	15	98	02FEB16	1 time	2 to 7 ounces or about 1 fillet or 4-14 pieces of sushi	No	No	< 30 minutes / day	Light	Week 24	02	Entered	57	Female	27OCT15	108	MF4637	<250 mg/day	Yes	Yes	<250 mg/day	No	Yes	Yes	Yes	Yes
		walking		shrimp	2	5 nuts	02_001	Visit 5	Yes	15	99	03FEB16	1 time	2 to 7 ounces or about 1 fillet or 4-14 pieces of sushi	No	No	< 30 minutes / day	Light	Week 24	02	Entered	57	Female	27OCT15	108	MF4637	<250 mg/day	Yes	Yes	<250 mg/day	No	Yes	Yes	Yes	Yes
		walking		shrimp	2	5 nuts	02_001	Visit 5	Yes	15	100	04FEB16	1 time	2 to 7 ounces or about 1 fillet or 4-14 pieces of sushi	No	No	< 30 minutes / day	Light	Week 24	02	Entered	57	Female	27OCT15	108	MF4637	<250 mg/day	Yes	Yes	<250 mg/day	No	Yes	Yes	Yes	Yes
		walking		shrimp	2	5 nuts	02_001	Visit 5	Yes	15	101	05FEB16	1 time	2 to 7 ounces or about 1 fillet or 4-14 pieces of sushi	No	No	< 30 minutes / day	Light	Week 24	02	Entered	57	Female	27OCT15	108	MF4637	<250 mg/day	Yes	Yes	<250 mg/day	No	Yes	Yes	Yes	Yes
		walking		shrimp	2	5 nuts	02_001	Visit 5	Yes	15	102	06FEB16	1 time	2 to 7 ounces or about 1 fillet or 4-14 pieces of sushi	No	No	< 30 minutes / day	Light	Week 24	02	Entered	57	Female	27OCT15	108	MF4637	<250 mg/day	Yes	Yes	<250 mg/day	No	Yes	Yes	Yes	Yes
		walking		shrimp	2	5 nuts	02_001	Visit 5	Yes	15	103	07FEB16	1 time	2 to 7 ounces or about 1 fillet or 4-14 pieces of sushi	No	No	< 30 minutes / day	Light	Week 24	02	Entered	57	Female	27OCT15	108	MF4637	<250 mg/day	Yes	Yes	<250 mg/day	No	Yes	Yes	Yes	Yes
		walking		shrimp	2	5 nuts	02_001	Visit 5	Yes	15	104	08FEB16	1 time	2 to 7 ounces or about 1 fillet or 4-14 pieces of sushi	No	No	< 30 minutes / day	Light	Week 24	02	Entered	57	Female	27OCT15	108	MF4637	<250 mg/day	Yes	Yes	<250 mg/day	No	Yes	Yes	Yes	Yes
		walking		Shrimp	2	5 nuts	02_001	Visit 5	Yes	16	105	09FEB16	1 time	2 to 7 ounces or about 1 fillet or 4-14 pieces of sushi	No	No	< 30 minutes / day	Light	Week 24	02	Entered	57	Female	27OCT15	108	MF4637	<250 mg/day	Yes	Yes	<250 mg/day	No	Yes	Yes	Yes	Yes
		walking		Shrimp	2	5 nuts	02_001	Visit 5	Yes	16	106	10FEB16	1 time	2 to 7 ounces or about 1 fillet or 4-14 pieces of sushi	No	No	< 30 minutes / day	Light	Week 24	02	Entered	57	Female	27OCT15	108	MF4637	<250 mg/day	Yes	Yes	<250 mg/day	No	Yes	Yes	Yes	Yes
		walking		Shrimp	2	5 nuts	02_001	Visit 5	Yes	16	107	11FEB16	1 time	2 to 7 ounces or about 1 fillet or 4-14 pieces of sushi	No	No	< 30 minutes / day	Light	Week 24	02	Entered	57	Female	27OCT15	108	MF4637	<250 mg/day	Yes	Yes	<250 mg/day	No	Yes	Yes	Yes	Yes
		walking		Shrimp	2	5 nuts	02_001	Visit 5	Yes	16	108	12FEB16	1 time	2 to 7 ounces or about 1 fillet or 4-14 pieces of sushi	No	No	< 30 minutes / day	Light	Week 24	02	Entered	57	Female	27OCT15	108	MF4637	<250 mg/day	Yes	Yes	<250 mg/day	No	Yes	Yes	Yes	Yes
		walking		Shrimp	2	5 nuts	02_001	Visit 5	Yes	16	109	13FEB16	1 time	2 to 7 ounces or about 1 fillet or 4-14 pieces of sushi	No	No	< 30 minutes / day	Light	Week 24	02	Entered	57	Female	27OCT15	108	MF4637	<250 mg/day	Yes	Yes	<250 mg/day	No	Yes	Yes	Yes	Yes
		walking		Shrimp	2	5 nuts	02_001	Visit 5	Yes	16	110	14FEB16	1 time	2 to 7 ounces or about 1 fillet or 4-14 pieces of sushi	No	No	< 30 minutes / day	Light	Week 24	02	Entered	57	Female	27OCT15	108	MF4637	<250 mg/day	Yes	Yes	<250 mg/day	No	Yes	Yes	Yes	Yes
		walking		Shrimp	2	5 nuts	02_001	Visit 5	Yes	16	111	15FEB16	1 time	2 to 7 ounces or about 1 fillet or 4-14 pieces of sushi	No	No	< 30 minutes / day	Light	Week 24	02	Entered	57	Female	27OCT15	108	MF4637	<250 mg/day	Yes	Yes	<250 mg/day	No	Yes	Yes	Yes	Yes
		Walking		shrimp	1	2	02_001	Visit 5	Yes	17	112	16FEB16	1 time	2 to 7 ounces or about 1 fillet or 4-14 pieces of sushi	No	No	< 30 minutes / day	Light	Week 24	02	Entered	57	Female	27OCT15	108	MF4637	<250 mg/day	Yes	Yes	<250 mg/day	No	Yes	Yes	Yes	Yes
		Walking		shrimp	1	2	02_001	Visit 5	Yes	17	113	17FEB16	1 time	2 to 7 ounces or about 1 fillet or 4-14 pieces of sushi	No	No	< 30 minutes / day	Light	Week 24	02	Entered	57	Female	27OCT15	108	MF4637	<250 mg/day	Yes	Yes	<250 mg/day	No	Yes	Yes	Yes	Yes
		Walking		shrimp	1	2	02_001	Visit 5	Yes	17	114	18FEB16	1 time	2 to 7 ounces or about 1 fillet or 4-14 pieces of sushi	No	No	< 30 minutes / day	Light	Week 24	02	Entered	57	Female	27OCT15	108	MF4637	<250 mg/day	Yes	Yes	<250 mg/day	No	Yes	Yes	Yes	Yes
		Walking		shrimp	1	2	02_001	Visit 5	Yes	17	115	19FEB16	1 time	2 to 7 ounces or about 1 fillet or 4-14 pieces of sushi	No	No	< 30 minutes / day	Light	Week 24	02	Entered	57	Female	27OCT15	108	MF4637	<250 mg/day	Yes	Yes	<250 mg/day	No	Yes	Yes	Yes	Yes
		Walking		shrimp	1	2	02_001	Visit 5	Yes	17	116	20FEB16	1 time	2 to 7 ounces or about 1 fillet or 4-14 pieces of sushi	No	No	< 30 minutes / day	Light	Week 24	02	Entered	57	Female	27OCT15	108	MF4637	<250 mg/day	Yes	Yes	<250 mg/day	No	Yes	Yes	Yes	Yes
		Walking		shrimp	1	2	02_001	Visit 5	Yes	17	117	21FEB16	1 time	2 to 7 ounces or about 1 fillet or 4-14 pieces of sushi	No	No	< 30 minutes / day	Light	Week 24	02	Entered	57	Female	27OCT15	108	MF4637	<250 mg/day	Yes	Yes	<250 mg/day	No	Yes	Yes	Yes	Yes
		Walking		shrimp	1	2	02_001	Visit 5	Yes	17	118	22FEB16	1 time	2 to 7 ounces or about 1 fillet or 4-14 pieces of sushi	No	No	< 30 minutes / day	Light	Week 24	02	Entered	57	Female	27OCT15	108	MF4637	<250 mg/day	Yes	Yes	<250 mg/day	No	Yes	Yes	Yes	Yes
		Walking			2	2	02_001	Visit 5	Yes	18	119	23FEB16	0 (not at all) (if 0, skip questions 2 and 3)		No	No	< 30 minutes / day	Light	Week 24	02	Entered	57	Female	27OCT15	108	MF4637	<250 mg/day	Yes	Yes	<250 mg/day	No	Yes	Yes	Yes	Yes
		Walking			2	2	02_001	Visit 5	Yes	18	120	24FEB16	0 (not at all) (if 0, skip questions 2 and 3)		No	No	< 30 minutes / day	Light	Week 24	02	Entered	57	Female	27OCT15	108	MF4637	<250 mg/day	Yes	Yes	<250 mg/day	No	Yes	Yes	Yes	Yes
		Walking			2	2	02_001	Visit 5	Yes	18	121	25FEB16	0 (not at all) (if 0, skip questions 2 and 3)		No	No	< 30 minutes / day	Light	Week 24	02	Entered	57	Female	27OCT15	108	MF4637	<250 mg/day	Yes	Yes	<250 mg/day	No	Yes	Yes	Yes	Yes
		Walking			2	2	02_001	Visit 5	Yes	18	122	26FEB16	0 (not at all) (if 0, skip questions 2 and 3)		No	No	< 30 minutes / day	Light	Week 24	02	Entered	57	Female	27OCT15	108	MF4637	<250 mg/day	Yes	Yes	<250 mg/day	No	Yes	Yes	Yes	Yes
		Walking			2	2	02_001	Visit 5	Yes	18	123	27FEB16	0 (not at all) (if 0, skip questions 2 and 3)		No	No	< 30 minutes / day	Light	Week 24	02	Entered	57	Female	27OCT15	108	MF4637	<250 mg/day	Yes	Yes	<250 mg/day	No	Yes	Yes	Yes	Yes
		Walking			2	2	02_001	Visit 5	Yes	18	124	28FEB16	0 (not at all) (if 0, skip questions 2 and 3)		No	No	< 30 minutes / day	Light	Week 24	02	Entered	57	Female	27OCT15	108	MF4637	<250 mg/day	Yes	Yes	<250 mg/day	No	Yes	Yes	Yes	Yes
		Walking			2	2	02_001	Visit 5	Yes	18	125	29FEB16	0 (not at all) (if 0, skip questions 2 and 3)		No	No	< 30 minutes / day	Light	Week 24	02	Entered	57	Female	27OCT15	108	MF4637	<250 mg/day	Yes	Yes	<250 mg/day	No	Yes	Yes	Yes	Yes
		Walking		shrimp	1	2	02_001	Visit 5	No	19	126	01MAR16	1 time	2 to 7 ounces or about 1 fillet or 4-14 pieces of sushi	No	No	< 30 minutes / day	Light	Week 24	02	Entered	57	Female	27OCT15	108	MF4637	<250 mg/day	Yes	Yes	<250 mg/day	No	Yes	Yes	Yes	Yes
		Walking		shrimp	1	2	02_001	Visit 5	No	19	127	02MAR16	1 time	2 to 7 ounces or about 1 fillet or 4-14 pieces of sushi	No	No	< 30 minutes / day	Light	Week 24	02	Entered	57	Female	27OCT15	108	MF4637	<250 mg/day	Yes	Yes	<250 mg/day	No	Yes	Yes	Yes	Yes
		Walking		shrimp	1	2	02_001	Visit 5	No	19	128	03MAR16	1 time	2 to 7 ounces or about 1 fillet or 4-14 pieces of sushi	No	No	< 30 minutes / day	Light	Week 24	02	Entered	57	Female	27OCT15	108	MF4637	<250 mg/day	Yes	Yes	<250 mg/day	No	Yes	Yes	Yes	Yes
		Walking		shrimp	1	2	02_001	Visit 5	No	19	129	04MAR16	1 time	2 to 7 ounces or about 1 fillet or 4-14 pieces of sushi	No	No	< 30 minutes / day	Light	Week 24	02	Entered	57	Female	27OCT15	108	MF4637	<250 mg/day	Yes	Yes	<250 mg/day	No	Yes	Yes	Yes	Yes
		Walking		shrimp	1	2	02_001	Visit 5	No	19	130	05MAR16	1 time	2 to 7 ounces or about 1 fillet or 4-14 pieces of sushi	No	No	< 30 minutes / day	Light	Week 24	02	Entered	57	Female	27OCT15	108	MF4637	<250 mg/day	Yes	Yes	<250 mg/day	No	Yes	Yes	Yes	Yes
		Walking		shrimp	1	2	02_001	Visit 5	No	19	131	06MAR16	1 time	2 to 7 ounces or about 1 fillet or 4-14 pieces of sushi	No	No	< 30 minutes / day	Light	Week 24	02	Entered	57	Female	27OCT15	108	MF4637	<250 mg/day	Yes	Yes	<250 mg/day	No	Yes	Yes	Yes	Yes
		Walking		shrimp	1	2	02_001	Visit 5	Yes	19	132	07MAR16	1 time	2 to 7 ounces or about 1 fillet or 4-14 pieces of sushi	No	No	< 30 minutes / day	Light	Week 24	02	Entered	57	Female	27OCT15	108	MF4637	<250 mg/day	Yes	Yes	<250 mg/day	No	Yes	Yes	Yes	Yes
		walking		shrimp	1	2	02_001	Visit 5	Yes	20	133	08MAR16	1 time	2 to 7 ounces or about 1 fillet or 4-14 pieces of sushi	No	No	< 30 minutes / day	Light	Week 24	02	Entered	57	Female	27OCT15	108	MF4637	<250 mg/day	Yes	Yes	<250 mg/day	No	Yes	Yes	Yes	Yes
		walking		shrimp	1	2	02_001	Visit 5	Yes	20	134	09MAR16	1 time	2 to 7 ounces or about 1 fillet or 4-14 pieces of sushi	No	No	< 30 minutes / day	Light	Week 24	02	Entered	57	Female	27OCT15	108	MF4637	<250 mg/day	Yes	Yes	<250 mg/day	No	Yes	Yes	Yes	Yes
		walking		shrimp	1	2	02_001	Visit 5	Yes	20	135	10MAR16	1 time	2 to 7 ounces or about 1 fillet or 4-14 pieces of sushi	No	No	< 30 minutes / day	Light	Week 24	02	Entered	57	Female	27OCT15	108	MF4637	<250 mg/day	Yes	Yes	<250 mg/day	No	Yes	Yes	Yes	Yes
		walking		shrimp	1	2	02_001	Visit 5	Yes	20	136	11MAR16	1 time	2 to 7 ounces or about 1 fillet or 4-14 pieces of sushi	No	No	< 30 minutes / day	Light	Week 24	02	Entered	57	Female	27OCT15	108	MF4637	<250 mg/day	Yes	Yes	<250 mg/day	No	Yes	Yes	Yes	Yes
		walking		shrimp	1	2	02_001	Visit 5	Yes	20	137	12MAR16	1 time	2 to 7 ounces or about 1 fillet or 4-14 pieces of sushi	No	No	< 30 minutes / day	Light	Week 24	02	Entered	57	Female	27OCT15	108	MF4637	<250 mg/day	Yes	Yes	<250 mg/day	No	Yes	Yes	Yes	Yes
		walking		shrimp	1	2	02_001	Visit 5	Yes	20	138	13MAR16	1 time	2 to 7 ounces or about 1 fillet or 4-14 pieces of sushi	No	No	< 30 minutes / day	Light	Week 24	02	Entered	57	Female	27OCT15	108	MF4637	<250 mg/day	Yes	Yes	<250 mg/day	No	Yes	Yes	Yes	Yes
		walking		shrimp	1	2	02_001	Visit 5	Yes	20	139	14MAR16	1 time	2 to 7 ounces or about 1 fillet or 4-14 pieces of sushi	No	No	< 30 minutes / day	Light	Week 24	02	Entered	57	Female	27OCT15	108	MF4637	<250 mg/day	Yes	Yes	<250 mg/day	No	Yes	Yes	Yes	Yes
		Walking		Shrimp	1	2	02_001	Visit 5	Yes	21	140	15MAR16	1 time	2 to 7 ounces or about 1 fillet or 4-14 pieces of sushi	No	No	< 30 minutes / day	Light	Week 24	02	Entered	57	Female	27OCT15	108	MF4637	<250 mg/day	Yes	Yes	<250 mg/day	No	Yes	Yes	Yes	Yes
		Walking		Shrimp	1	2	02_001	Visit 5	Yes	21	141	16MAR16	1 time	2 to 7 ounces or about 1 fillet or 4-14 pieces of sushi	No	No	< 30 minutes / day	Light	Week 24	02	Entered	57	Female	27OCT15	108	MF4637	<250 mg/day	Yes	Yes	<250 mg/day	No	Yes	Yes	Yes	Yes
		Walking		Shrimp	1	2	02_001	Visit 5	Yes	21	142	17MAR16	1 time	2 to 7 ounces or about 1 fillet or 4-14 pieces of sushi	No	No	< 30 minutes / day	Light	Week 24	02	Entered	57	Female	27OCT15	108	MF4637	<250 mg/day	Yes	Yes	<250 mg/day	No	Yes	Yes	Yes	Yes
		Walking		Shrimp	1	2	02_001	Visit 5	Yes	21	143	18MAR16	1 time	2 to 7 ounces or about 1 fillet or 4-14 pieces of sushi	No	No	< 30 minutes / day	Light	Week 24	02	Entered	57	Female	27OCT15	108	MF4637	<250 mg/day	Yes	Yes	<250 mg/day	No	Yes	Yes	Yes	Yes
		Walking		Shrimp	1	2	02_001	Visit 5	Yes	21	144	19MAR16	1 time	2 to 7 ounces or about 1 fillet or 4-14 pieces of sushi	No	No	< 30 minutes / day	Light	Week 24	02	Entered	57	Female	27OCT15	108	MF4637	<250 mg/day	Yes	Yes	<250 mg/day	No	Yes	Yes	Yes	Yes
		Walking		Shrimp	1	2	02_001	Visit 5	Yes	21	145	20MAR16	1 time	2 to 7 ounces or about 1 fillet or 4-14 pieces of sushi	No	No	< 30 minutes / day	Light	Week 24	02	Entered	57	Female	27OCT15	108	MF4637	<250 mg/day	Yes	Yes	<250 mg/day	No	Yes	Yes	Yes	Yes
		Walking		Shrimp	1	2	02_001	Visit 5	Yes	21	146	21MAR16	1 time	2 to 7 ounces or about 1 fillet or 4-14 pieces of sushi	No	No	< 30 minutes / day	Light	Week 24	02	Entered	57	Female	27OCT15	108	MF4637	<250 mg/day	Yes	Yes	<250 mg/day	No	Yes	Yes	Yes	Yes
		Walking		shrimp	1	2	02_001	Visit 5	No	22	147	22MAR16	1 time	2 to 7 ounces or about 1 fillet or 4-14 pieces of sushi	No	No	< 30 minutes / day	Light	Week 24	02	Entered	57	Female	27OCT15	108	MF4637	<250 mg/day	Yes	Yes	<250 mg/day	No	Yes	Yes	Yes	Yes
		Walking		shrimp	1	2	02_001	Visit 5	No	22	148	23MAR16	1 time	2 to 7 ounces or about 1 fillet or 4-14 pieces of sushi	No	No	< 30 minutes / day	Light	Week 24	02	Entered	57	Female	27OCT15	108	MF4637	<250 mg/day	Yes	Yes	<250 mg/day	No	Yes	Yes	Yes	Yes
		Walking		shrimp	1	2	02_001	Visit 5	No	22	149	24MAR16	1 time	2 to 7 ounces or about 1 fillet or 4-14 pieces of sushi	No	No	< 30 minutes / day	Light	Week 24	02	Entered	57	Female	27OCT15	108	MF4637	<250 mg/day	Yes	Yes	<250 mg/day	No	Yes	Yes	Yes	Yes
		Walking		shrimp	1	2	02_001	Visit 5	No	22	150	25MAR16	1 time	2 to 7 ounces or about 1 fillet or 4-14 pieces of sushi	No	No	< 30 minutes / day	Light	Week 24	02	Entered	57	Female	27OCT15	108	MF4637	<250 mg/day	Yes	Yes	<250 mg/day	No	Yes	Yes	Yes	Yes
		Walking		shrimp	1	2	02_001	Visit 5	No	22	151	26MAR16	1 time	2 to 7 ounces or about 1 fillet or 4-14 pieces of sushi	No	No	< 30 minutes / day	Light	Week 24	02	Entered	57	Female	27OCT15	108	MF4637	<250 mg/day	Yes	Yes	<250 mg/day	No	Yes	Yes	Yes	Yes
		Walking		shrimp	1	2	02_001	Visit 5	No	22	152	27MAR16	1 time	2 to 7 ounces or about 1 fillet or 4-14 pieces of sushi	No	No	< 30 minutes / day	Light	Week 24	02	Entered	57	Female	27OCT15	108	MF4637	<250 mg/day	Yes	Yes	<250 mg/day	No	Yes	Yes	Yes	Yes
		Walking		shrimp	1	2	02_001	Visit 5	Yes	22	153	28MAR16	1 time	2 to 7 ounces or about 1 fillet or 4-14 pieces of sushi	No	No	< 30 minutes / day	Light	Week 24	02	Entered	57	Female	27OCT15	108	MF4637	<250 mg/day	Yes	Yes	<250 mg/day	No	Yes	Yes	Yes	Yes
		Walking			1	2	02_001	Visit 5	Yes	23	154	29MAR16	0 (not at all) (if 0, skip questions 2 and 3)		No	No	< 30 minutes / day	Light	Week 24	02	Entered	57	Female	27OCT15	108	MF4637	<250 mg/day	Yes	Yes	<250 mg/day	No	Yes	Yes	Yes	Yes
		Walking			1	2	02_001	Visit 5	Yes	23	155	30MAR16	0 (not at all) (if 0, skip questions 2 and 3)		No	No	< 30 minutes / day	Light	Week 24	02	Entered	57	Female	27OCT15	108	MF4637	<250 mg/day	Yes	Yes	<250 mg/day	No	Yes	Yes	Yes	Yes
		Walking			1	2	02_001	Visit 5	Yes	23	156	31MAR16	0 (not at all) (if 0, skip questions 2 and 3)		No	No	< 30 minutes / day	Light	Week 24	02	Entered	57	Female	27OCT15	108	MF4637	<250 mg/day	Yes	Yes	<250 mg/day	No	Yes	Yes	Yes	Yes
		Walking			1	2	02_001	Visit 5	Yes	23	157	01APR16	0 (not at all) (if 0, skip questions 2 and 3)		No	No	< 30 minutes / day	Light	Week 24	02	Entered	57	Female	27OCT15	108	MF4637	<250 mg/day	Yes	Yes	<250 mg/day	No	Yes	Yes	Yes	Yes
		Walking			1	2	02_001	Visit 5	Yes	23	158	02APR16	0 (not at all) (if 0, skip questions 2 and 3)		No	No	< 30 minutes / day	Light	Week 24	02	Entered	57	Female	27OCT15	108	MF4637	<250 mg/day	Yes	Yes	<250 mg/day	No	Yes	Yes	Yes	Yes
		Walking			1	2	02_001	Visit 5	Yes	23	159	03APR16	0 (not at all) (if 0, skip questions 2 and 3)		No	No	< 30 minutes / day	Light	Week 24	02	Entered	57	Female	27OCT15	108	MF4637	<250 mg/day	Yes	Yes	<250 mg/day	No	Yes	Yes	Yes	Yes
		Walking			1	2	02_001	Visit 5	Yes	23	160	04APR16	0 (not at all) (if 0, skip questions 2 and 3)		No	No	< 30 minutes / day	Light	Week 24	02	Entered	57	Female	27OCT15	108	MF4637	<250 mg/day	Yes	Yes	<250 mg/day	No	Yes	Yes	Yes	Yes
		Walking			1	3	02_001	Visit 5	Yes	24	161	05APR16	0 (not at all) (if 0, skip questions 2 and 3)		No	No	< 30 minutes / day	Light	Week 24	02	Entered	57	Female	27OCT15	108	MF4637	<250 mg/day	Yes	Yes	<250 mg/day	No	Yes	Yes	Yes	Yes
		Walking			1	3	02_001	Visit 5	Yes	24	162	06APR16	0 (not at all) (if 0, skip questions 2 and 3)		No	No	< 30 minutes / day	Light	Week 24	02	Entered	57	Female	27OCT15	108	MF4637	<250 mg/day	Yes	Yes	<250 mg/day	No	Yes	Yes	Yes	Yes
		Walking			1	3	02_001	Visit 5	Yes	24	163	07APR16	0 (not at all) (if 0, skip questions 2 and 3)		No	No	< 30 minutes / day	Light	Week 24	02	Entered	57	Female	27OCT15	108	MF4637	<250 mg/day	Yes	Yes	<250 mg/day	No	Yes	Yes	Yes	Yes
		Walking			1	3	02_001	Visit 5	Yes	24	164	08APR16	0 (not at all) (if 0, skip questions 2 and 3)		No	No	< 30 minutes / day	Light	Week 24	02	Entered	57	Female	27OCT15	108	MF4637	<250 mg/day	Yes	Yes	<250 mg/day	No	Yes	Yes	Yes	Yes
		Walking			1	3	02_001	Visit 5	Yes	24	165	09APR16	0 (not at all) (if 0, skip questions 2 and 3)		No	No	< 30 minutes / day	Light	Week 24	02	Entered	57	Female	27OCT15	108	MF4637	<250 mg/day	Yes	Yes	<250 mg/day	No	Yes	Yes	Yes	Yes
		Walking			1	3	02_001	Visit 5	Yes	24	166	10APR16	0 (not at all) (if 0, skip questions 2 and 3)		No	No	< 30 minutes / day	Light	Week 24	02	Entered	57	Female	27OCT15	108	MF4637	<250 mg/day	Yes	Yes	<250 mg/day	No	Yes	Yes	Yes	Yes
		Walking			1	3	02_001	Visit 5	Yes	24	167	11APR16	0 (not at all) (if 0, skip questions 2 and 3)		No	No	< 30 minutes / day	Light	Week 24	02	Entered	57	Female	27OCT15	108	MF4637	<250 mg/day	Yes	Yes	<250 mg/day	No	Yes	Yes	Yes	Yes
							02_001	Visit 5	Yes	25	168	12APR16							Week 24	02	Entered	57	Female	27OCT15	108	MF4637	<250 mg/day	Yes	Yes	<250 mg/day	No	Yes	Yes	Yes	Yes
							02_001	Visit 5	Yes	25	169	13APR16							Week 24	02	Entered	57	Female	27OCT15	108	MF4637	<250 mg/day	Yes	Yes	<250 mg/day	No	Yes	Yes	Yes	Yes
							02_001	Visit 5	Yes	25	170	14APR16							Week 24	02	Entered	57	Female	27OCT15	108	MF4637	<250 mg/day	Yes	Yes	<250 mg/day	No	Yes	Yes	Yes	Yes
							02_001	Visit 5	Yes	25	171	15APR16							Week 24	02	Entered	57	Female	27OCT15	108	MF4637	<250 mg/day	Yes	Yes	<250 mg/day	No	Yes	Yes	Yes	Yes
							02_001	Visit 5	Yes	25	172	16APR16							Week 24	02	Entered	57	Female	27OCT15	108	MF4637	<250 mg/day	Yes	Yes	<250 mg/day	No	Yes	Yes	Yes	Yes
							02_001	Visit 5	Yes	25	173	17APR16							Week 24	02	Entered	57	Female	27OCT15	108	MF4637	<250 mg/day	Yes	Yes	<250 mg/day	No	Yes	Yes	Yes	Yes
			I took them at supper 5pm same day	Tuna	2 times	Yesterday had 4 ounces of cashews	02_002	Visit 3	No	1	0	05NOV15	2 times	2 to 7 ounces or about 1 fillet or 4-14 pieces of sushi	No	No	0 minutes (no exercise) / day		Week 6	02	Entered	41	Male	06NOV15	109	MF4637	<250 mg/day	No	Yes	>=250 mg/day	No	Yes	Yes	Yes	Yes
				Tuna	2 times	Yesterday had 4 ounces of cashews	02_002	Visit 3	Yes	1	1	06NOV15	2 times	2 to 7 ounces or about 1 fillet or 4-14 pieces of sushi	No	No	0 minutes (no exercise) / day		Week 6	02	Entered	41	Male	06NOV15	109	MF4637	<250 mg/day	No	Yes	>=250 mg/day	No	Yes	Yes	Yes	Yes
				Tuna	2 times	Yesterday had 4 ounces of cashews	02_002	Visit 3	Yes	1	2	07NOV15	2 times	2 to 7 ounces or about 1 fillet or 4-14 pieces of sushi	No	No	0 minutes (no exercise) / day		Week 6	02	Entered	41	Male	06NOV15	109	MF4637	<250 mg/day	No	Yes	>=250 mg/day	No	Yes	Yes	Yes	Yes
				Tuna	2 times	Yesterday had 4 ounces of cashews	02_002	Visit 3	Yes	1	3	08NOV15	2 times	2 to 7 ounces or about 1 fillet or 4-14 pieces of sushi	No	No	0 minutes (no exercise) / day		Week 6	02	Entered	41	Male	06NOV15	109	MF4637	<250 mg/day	No	Yes	>=250 mg/day	No	Yes	Yes	Yes	Yes
				Tuna	2 times	Yesterday had 4 ounces of cashews	02_002	Visit 3	Yes	1	4	09NOV15	2 times	2 to 7 ounces or about 1 fillet or 4-14 pieces of sushi	No	No	0 minutes (no exercise) / day		Week 6	02	Entered	41	Male	06NOV15	109	MF4637	<250 mg/day	No	Yes	>=250 mg/day	No	Yes	Yes	Yes	Yes
				Tuna	2 times	Yesterday had 4 ounces of cashews	02_002	Visit 3	Yes	1	5	10NOV15	2 times	2 to 7 ounces or about 1 fillet or 4-14 pieces of sushi	No	No	0 minutes (no exercise) / day		Week 6	02	Entered	41	Male	06NOV15	109	MF4637	<250 mg/day	No	Yes	>=250 mg/day	No	Yes	Yes	Yes	Yes
				Tuna	2 times	Yesterday had 4 ounces of cashews	02_002	Visit 3	Yes	1	6	11NOV15	2 times	2 to 7 ounces or about 1 fillet or 4-14 pieces of sushi	No	No	0 minutes (no exercise) / day		Week 6	02	Entered	41	Male	06NOV15	109	MF4637	<250 mg/day	No	Yes	>=250 mg/day	No	Yes	Yes	Yes	Yes
		Walking		Tuna	1 time	None	02_002	Visit 3	Yes	2	7	11NOV15	2 times	Less than 2 ounces or less than one fillet or less than 4 pieces of sushi	No	No	< 30 minutes / day	Light	Week 6	02	Entered	41	Male	06NOV15	109	MF4637	<250 mg/day	No	Yes	>=250 mg/day	No	Yes	Yes	Yes	Yes
		Walking		Tuna	1 time	None	02_002	Visit 3	Yes	2	8	12NOV15	2 times	Less than 2 ounces or less than one fillet or less than 4 pieces of sushi	No	No	< 30 minutes / day	Light	Week 6	02	Entered	41	Male	06NOV15	109	MF4637	<250 mg/day	No	Yes	>=250 mg/day	No	Yes	Yes	Yes	Yes
		Walking		Tuna	1 time	None	02_002	Visit 3	Yes	2	9	13NOV15	2 times	Less than 2 ounces or less than one fillet or less than 4 pieces of sushi	No	No	< 30 minutes / day	Light	Week 6	02	Entered	41	Male	06NOV15	109	MF4637	<250 mg/day	No	Yes	>=250 mg/day	No	Yes	Yes	Yes	Yes
		Walking		Tuna	1 time	None	02_002	Visit 3	Yes	2	10	14NOV15	2 times	Less than 2 ounces or less than one fillet or less than 4 pieces of sushi	No	No	< 30 minutes / day	Light	Week 6	02	Entered	41	Male	06NOV15	109	MF4637	<250 mg/day	No	Yes	>=250 mg/day	No	Yes	Yes	Yes	Yes
		Walking		Tuna	1 time	None	02_002	Visit 3	Yes	2	11	15NOV15	2 times	Less than 2 ounces or less than one fillet or less than 4 pieces of sushi	No	No	< 30 minutes / day	Light	Week 6	02	Entered	41	Male	06NOV15	109	MF4637	<250 mg/day	No	Yes	>=250 mg/day	No	Yes	Yes	Yes	Yes
		Walking		Tuna	1 time	None	02_002	Visit 3	Yes	2	12	16NOV15	2 times	Less than 2 ounces or less than one fillet or less than 4 pieces of sushi	No	No	< 30 minutes / day	Light	Week 6	02	Entered	41	Male	06NOV15	109	MF4637	<250 mg/day	No	Yes	>=250 mg/day	No	Yes	Yes	Yes	Yes
		Walking		Tuna	1 time	None	02_002	Visit 3	Yes	2	13	17NOV15	2 times	Less than 2 ounces or less than one fillet or less than 4 pieces of sushi	No	No	< 30 minutes / day	Light	Week 6	02	Entered	41	Male	06NOV15	109	MF4637	<250 mg/day	No	Yes	>=250 mg/day	No	Yes	Yes	Yes	Yes
		Walking			No fried and no fast food	Corn chips 2 times	02_002	Visit 3	Yes	3	14	18NOV15	0 (not at all) (if 0, skip questions 2 and 3)		No	No	< 30 minutes / day	Moderate	Week 6	02	Entered	41	Male	06NOV15	109	MF4637	<250 mg/day	No	Yes	>=250 mg/day	No	Yes	Yes	Yes	Yes
		Walking			No fried and no fast food	Corn chips 2 times	02_002	Visit 3	Yes	3	15	19NOV15	0 (not at all) (if 0, skip questions 2 and 3)		No	No	< 30 minutes / day	Moderate	Week 6	02	Entered	41	Male	06NOV15	109	MF4637	<250 mg/day	No	Yes	>=250 mg/day	No	Yes	Yes	Yes	Yes
		Walking			No fried and no fast food	Corn chips 2 times	02_002	Visit 3	Yes	3	16	20NOV15	0 (not at all) (if 0, skip questions 2 and 3)		No	No	< 30 minutes / day	Moderate	Week 6	02	Entered	41	Male	06NOV15	109	MF4637	<250 mg/day	No	Yes	>=250 mg/day	No	Yes	Yes	Yes	Yes
		Walking			No fried and no fast food	Corn chips 2 times	02_002	Visit 3	Yes	3	17	21NOV15	0 (not at all) (if 0, skip questions 2 and 3)		No	No	< 30 minutes / day	Moderate	Week 6	02	Entered	41	Male	06NOV15	109	MF4637	<250 mg/day	No	Yes	>=250 mg/day	No	Yes	Yes	Yes	Yes
		Walking			No fried and no fast food	Corn chips 2 times	02_002	Visit 3	Yes	3	18	22NOV15	0 (not at all) (if 0, skip questions 2 and 3)		No	No	< 30 minutes / day	Moderate	Week 6	02	Entered	41	Male	06NOV15	109	MF4637	<250 mg/day	No	Yes	>=250 mg/day	No	Yes	Yes	Yes	Yes
		Walking			No fried and no fast food	Corn chips 2 times	02_002	Visit 3	Yes	3	19	23NOV15	0 (not at all) (if 0, skip questions 2 and 3)		No	No	< 30 minutes / day	Moderate	Week 6	02	Entered	41	Male	06NOV15	109	MF4637	<250 mg/day	No	Yes	>=250 mg/day	No	Yes	Yes	Yes	Yes
		Walking			No fried and no fast food	Corn chips 2 times	02_002	Visit 3	Yes	3	20	24NOV15	0 (not at all) (if 0, skip questions 2 and 3)		No	No	< 30 minutes / day	Moderate	Week 6	02	Entered	41	Male	06NOV15	109	MF4637	<250 mg/day	No	Yes	>=250 mg/day	No	Yes	Yes	Yes	Yes
I ate a crazy amount of sweets and starches Thursday thru Saturday		Moving boxes and walking			None	2 times pecans	02_002	Visit 3	Yes	4	21	25NOV15	0 (not at all) (if 0, skip questions 2 and 3)		Yes	No	30 or more minutes / day	Moderate	Week 6	02	Entered	41	Male	06NOV15	109	MF4637	<250 mg/day	No	Yes	>=250 mg/day	No	Yes	Yes	Yes	Yes
I ate a crazy amount of sweets and starches Thursday thru Saturday		Moving boxes and walking			None	2 times pecans	02_002	Visit 3	Yes	4	22	26NOV15	0 (not at all) (if 0, skip questions 2 and 3)		Yes	No	30 or more minutes / day	Moderate	Week 6	02	Entered	41	Male	06NOV15	109	MF4637	<250 mg/day	No	Yes	>=250 mg/day	No	Yes	Yes	Yes	Yes
I ate a crazy amount of sweets and starches Thursday thru Saturday		Moving boxes and walking			None	2 times pecans	02_002	Visit 3	Yes	4	23	27NOV15	0 (not at all) (if 0, skip questions 2 and 3)		Yes	No	30 or more minutes / day	Moderate	Week 6	02	Entered	41	Male	06NOV15	109	MF4637	<250 mg/day	No	Yes	>=250 mg/day	No	Yes	Yes	Yes	Yes
I ate a crazy amount of sweets and starches Thursday thru Saturday		Moving boxes and walking			None	2 times pecans	02_002	Visit 3	Yes	4	24	28NOV15	0 (not at all) (if 0, skip questions 2 and 3)		Yes	No	30 or more minutes / day	Moderate	Week 6	02	Entered	41	Male	06NOV15	109	MF4637	<250 mg/day	No	Yes	>=250 mg/day	No	Yes	Yes	Yes	Yes
I ate a crazy amount of sweets and starches Thursday thru Saturday		Moving boxes and walking			None	2 times pecans	02_002	Visit 3	Yes	4	25	29NOV15	0 (not at all) (if 0, skip questions 2 and 3)		Yes	No	30 or more minutes / day	Moderate	Week 6	02	Entered	41	Male	06NOV15	109	MF4637	<250 mg/day	No	Yes	>=250 mg/day	No	Yes	Yes	Yes	Yes
I ate a crazy amount of sweets and starches Thursday thru Saturday		Moving boxes and walking			None	2 times pecans	02_002	Visit 3	Yes	4	26	30NOV15	0 (not at all) (if 0, skip questions 2 and 3)		Yes	No	30 or more minutes / day	Moderate	Week 6	02	Entered	41	Male	06NOV15	109	MF4637	<250 mg/day	No	Yes	>=250 mg/day	No	Yes	Yes	Yes	Yes
I ate a crazy amount of sweets and starches Thursday thru Saturday		Moving boxes and walking			None	2 times pecans	02_002	Visit 3	Yes	4	27	01DEC15	0 (not at all) (if 0, skip questions 2 and 3)		Yes	No	30 or more minutes / day	Moderate	Week 6	02	Entered	41	Male	06NOV15	109	MF4637	<250 mg/day	No	Yes	>=250 mg/day	No	Yes	Yes	Yes	Yes
		Walking		Shrimp	0	2 times	02_002	Visit 3	Yes	5	28	02DEC15	1 time	2 to 7 ounces or about 1 fillet or 4-14 pieces of sushi	No	No	30 or more minutes / day	Light	Week 6	02	Entered	41	Male	06NOV15	109	MF4637	<250 mg/day	No	Yes	>=250 mg/day	No	Yes	Yes	Yes	Yes
		Walking		Shrimp	0	2 times	02_002	Visit 3	Yes	5	29	03DEC15	1 time	2 to 7 ounces or about 1 fillet or 4-14 pieces of sushi	No	No	30 or more minutes / day	Light	Week 6	02	Entered	41	Male	06NOV15	109	MF4637	<250 mg/day	No	Yes	>=250 mg/day	No	Yes	Yes	Yes	Yes
		Walking		Shrimp	0	2 times	02_002	Visit 3	Yes	5	30	04DEC15	1 time	2 to 7 ounces or about 1 fillet or 4-14 pieces of sushi	No	No	30 or more minutes / day	Light	Week 6	02	Entered	41	Male	06NOV15	109	MF4637	<250 mg/day	No	Yes	>=250 mg/day	No	Yes	Yes	Yes	Yes
		Walking		Shrimp	0	2 times	02_002	Visit 3	Yes	5	31	05DEC15	1 time	2 to 7 ounces or about 1 fillet or 4-14 pieces of sushi	No	No	30 or more minutes / day	Light	Week 6	02	Entered	41	Male	06NOV15	109	MF4637	<250 mg/day	No	Yes	>=250 mg/day	No	Yes	Yes	Yes	Yes
		Walking		Shrimp	0	2 times	02_002	Visit 3	Yes	5	32	06DEC15	1 time	2 to 7 ounces or about 1 fillet or 4-14 pieces of sushi	No	No	30 or more minutes / day	Light	Week 6	02	Entered	41	Male	06NOV15	109	MF4637	<250 mg/day	No	Yes	>=250 mg/day	No	Yes	Yes	Yes	Yes
		Walking		Shrimp	0	2 times	02_002	Visit 3	Yes	5	33	07DEC15	1 time	2 to 7 ounces or about 1 fillet or 4-14 pieces of sushi	No	No	30 or more minutes / day	Light	Week 6	02	Entered	41	Male	06NOV15	109	MF4637	<250 mg/day	No	Yes	>=250 mg/day	No	Yes	Yes	Yes	Yes
		Walking		Shrimp	0	2 times	02_002	Visit 3	Yes	5	34	08DEC15	1 time	2 to 7 ounces or about 1 fillet or 4-14 pieces of sushi	No	No	30 or more minutes / day	Light	Week 6	02	Entered	41	Male	06NOV15	109	MF4637	<250 mg/day	No	Yes	>=250 mg/day	No	Yes	Yes	Yes	Yes
		Walking		Tuna, shrimp, perch	1 time	Corn chips 1 time	02_002	Visit 3	Yes	6	35	09DEC15	More than 2 times	More than 7 ounces or more than 1 fillet or more than 14 pieces of sushi	No	No	< 30 minutes / day	Light	Week 6	02	Entered	41	Male	06NOV15	109	MF4637	<250 mg/day	No	Yes	>=250 mg/day	No	Yes	Yes	Yes	Yes
		Walking		Tuna, shrimp, perch	1 time	Corn chips 1 time	02_002	Visit 3	Yes	6	36	10DEC15	More than 2 times	More than 7 ounces or more than 1 fillet or more than 14 pieces of sushi	No	No	< 30 minutes / day	Light	Week 6	02	Entered	41	Male	06NOV15	109	MF4637	<250 mg/day	No	Yes	>=250 mg/day	No	Yes	Yes	Yes	Yes
		Walking		Tuna, shrimp, perch	1 time	Corn chips 1 time	02_002	Visit 3	Yes	6	37	11DEC15	More than 2 times	More than 7 ounces or more than 1 fillet or more than 14 pieces of sushi	No	No	< 30 minutes / day	Light	Week 6	02	Entered	41	Male	06NOV15	109	MF4637	<250 mg/day	No	Yes	>=250 mg/day	No	Yes	Yes	Yes	Yes
		Walking		Tuna, shrimp, perch	1 time	Corn chips 1 time	02_002	Visit 3	Yes	6	38	12DEC15	More than 2 times	More than 7 ounces or more than 1 fillet or more than 14 pieces of sushi	No	No	< 30 minutes / day	Light	Week 6	02	Entered	41	Male	06NOV15	109	MF4637	<250 mg/day	No	Yes	>=250 mg/day	No	Yes	Yes	Yes	Yes
		Walking		Tuna, shrimp, perch	1 time	Corn chips 1 time	02_002	Visit 3	Yes	6	39	13DEC15	More than 2 times	More than 7 ounces or more than 1 fillet or more than 14 pieces of sushi	No	No	< 30 minutes / day	Light	Week 6	02	Entered	41	Male	06NOV15	109	MF4637	<250 mg/day	No	Yes	>=250 mg/day	No	Yes	Yes	Yes	Yes
		Walking		Tuna, shrimp, perch	1 time	Corn chips 1 time	02_002	Visit 3	Yes	6	40	14DEC15	More than 2 times	More than 7 ounces or more than 1 fillet or more than 14 pieces of sushi	No	No	< 30 minutes / day	Light	Week 6	02	Entered	41	Male	06NOV15	109	MF4637	<250 mg/day	No	Yes	>=250 mg/day	No	Yes	Yes	Yes	Yes
		Walking		Tuna, shrimp, perch	1 time	Corn chips 1 time	02_002	Visit 3	Yes	6	41	15DEC15	More than 2 times	More than 7 ounces or more than 1 fillet or more than 14 pieces of sushi	No	No	< 30 minutes / day	Light	Week 6	02	Entered	41	Male	06NOV15	109	MF4637	<250 mg/day	No	Yes	>=250 mg/day	No	Yes	Yes	Yes	Yes
		Walking		Tuna	None	None	02_002	Visit 4	Yes	7	42	16DEC15	2 times	2 to 7 ounces or about 1 fillet or 4-14 pieces of sushi	No	No	< 30 minutes / day	Light	Week 12	02	Entered	41	Male	06NOV15	109	MF4637	<250 mg/day	No	Yes	>=250 mg/day	No	Yes	Yes	Yes	Yes
		Walking		Tuna	None	None	02_002	Visit 4	Yes	7	43	17DEC15	2 times	2 to 7 ounces or about 1 fillet or 4-14 pieces of sushi	No	No	< 30 minutes / day	Light	Week 12	02	Entered	41	Male	06NOV15	109	MF4637	<250 mg/day	No	Yes	>=250 mg/day	No	Yes	Yes	Yes	Yes
		Walking		Tuna	None	None	02_002	Visit 4	Yes	7	44	18DEC15	2 times	2 to 7 ounces or about 1 fillet or 4-14 pieces of sushi	No	No	< 30 minutes / day	Light	Week 12	02	Entered	41	Male	06NOV15	109	MF4637	<250 mg/day	No	Yes	>=250 mg/day	No	Yes	Yes	Yes	Yes
		Walking		Tuna	None	None	02_002	Visit 4	Yes	7	45	19DEC15	2 times	2 to 7 ounces or about 1 fillet or 4-14 pieces of sushi	No	No	< 30 minutes / day	Light	Week 12	02	Entered	41	Male	06NOV15	109	MF4637	<250 mg/day	No	Yes	>=250 mg/day	No	Yes	Yes	Yes	Yes
		Walking		Tuna	None	None	02_002	Visit 4	Yes	7	46	20DEC15	2 times	2 to 7 ounces or about 1 fillet or 4-14 pieces of sushi	No	No	< 30 minutes / day	Light	Week 12	02	Entered	41	Male	06NOV15	109	MF4637	<250 mg/day	No	Yes	>=250 mg/day	No	Yes	Yes	Yes	Yes
		Walking		Tuna	None	None	02_002	Visit 4	Yes	7	47	21DEC15	2 times	2 to 7 ounces or about 1 fillet or 4-14 pieces of sushi	No	No	< 30 minutes / day	Light	Week 12	02	Entered	41	Male	06NOV15	109	MF4637	<250 mg/day	No	Yes	>=250 mg/day	No	Yes	Yes	Yes	Yes
		Walking		Tuna	None	None	02_002	Visit 4	Yes	7	48	22DEC15	2 times	2 to 7 ounces or about 1 fillet or 4-14 pieces of sushi	No	No	< 30 minutes / day	Light	Week 12	02	Entered	41	Male	06NOV15	109	MF4637	<250 mg/day	No	Yes	>=250 mg/day	No	Yes	Yes	Yes	Yes
		Walking		Salmon	1 time	Almonds 2 times	02_002	Visit 4	Yes	8	49	23DEC15	2 times	More than 7 ounces or more than 1 fillet or more than 14 pieces of sushi	No	No	< 30 minutes / day	Moderate	Week 12	02	Entered	41	Male	06NOV15	109	MF4637	<250 mg/day	No	Yes	>=250 mg/day	No	Yes	Yes	Yes	Yes
		Walking		Salmon	1 time	Almonds 2 times	02_002	Visit 4	Yes	8	50	24DEC15	2 times	More than 7 ounces or more than 1 fillet or more than 14 pieces of sushi	No	No	< 30 minutes / day	Moderate	Week 12	02	Entered	41	Male	06NOV15	109	MF4637	<250 mg/day	No	Yes	>=250 mg/day	No	Yes	Yes	Yes	Yes
		Walking		Salmon	1 time	Almonds 2 times	02_002	Visit 4	Yes	8	51	25DEC15	2 times	More than 7 ounces or more than 1 fillet or more than 14 pieces of sushi	No	No	< 30 minutes / day	Moderate	Week 12	02	Entered	41	Male	06NOV15	109	MF4637	<250 mg/day	No	Yes	>=250 mg/day	No	Yes	Yes	Yes	Yes
		Walking		Salmon	1 time	Almonds 2 times	02_002	Visit 4	Yes	8	52	26DEC15	2 times	More than 7 ounces or more than 1 fillet or more than 14 pieces of sushi	No	No	< 30 minutes / day	Moderate	Week 12	02	Entered	41	Male	06NOV15	109	MF4637	<250 mg/day	No	Yes	>=250 mg/day	No	Yes	Yes	Yes	Yes
		Walking		Salmon	1 time	Almonds 2 times	02_002	Visit 4	Yes	8	53	27DEC15	2 times	More than 7 ounces or more than 1 fillet or more than 14 pieces of sushi	No	No	< 30 minutes / day	Moderate	Week 12	02	Entered	41	Male	06NOV15	109	MF4637	<250 mg/day	No	Yes	>=250 mg/day	No	Yes	Yes	Yes	Yes
		Walking		Salmon	1 time	Almonds 2 times	02_002	Visit 4	Yes	8	54	28DEC15	2 times	More than 7 ounces or more than 1 fillet or more than 14 pieces of sushi	No	No	< 30 minutes / day	Moderate	Week 12	02	Entered	41	Male	06NOV15	109	MF4637	<250 mg/day	No	Yes	>=250 mg/day	No	Yes	Yes	Yes	Yes
		Walking		Salmon	1 time	Almonds 2 times	02_002	Visit 4	Yes	8	55	29DEC15	2 times	More than 7 ounces or more than 1 fillet or more than 14 pieces of sushi	No	No	< 30 minutes / day	Moderate	Week 12	02	Entered	41	Male	06NOV15	109	MF4637	<250 mg/day	No	Yes	>=250 mg/day	No	Yes	Yes	Yes	Yes
		Walking		Salmon	None	None	02_002	Visit 4	Yes	9	56	30DEC15	1 time	More than 7 ounces or more than 1 fillet or more than 14 pieces of sushi	No	No	< 30 minutes / day	Light	Week 12	02	Entered	41	Male	06NOV15	109	MF4637	<250 mg/day	No	Yes	>=250 mg/day	No	Yes	Yes	Yes	Yes
		Walking		Salmon	None	None	02_002	Visit 4	Yes	9	57	31DEC15	1 time	More than 7 ounces or more than 1 fillet or more than 14 pieces of sushi	No	No	< 30 minutes / day	Light	Week 12	02	Entered	41	Male	06NOV15	109	MF4637	<250 mg/day	No	Yes	>=250 mg/day	No	Yes	Yes	Yes	Yes
		Walking		Salmon	None	None	02_002	Visit 4	Yes	9	58	01JAN16	1 time	More than 7 ounces or more than 1 fillet or more than 14 pieces of sushi	No	No	< 30 minutes / day	Light	Week 12	02	Entered	41	Male	06NOV15	109	MF4637	<250 mg/day	No	Yes	>=250 mg/day	No	Yes	Yes	Yes	Yes
		Walking		Salmon	None	None	02_002	Visit 4	Yes	9	59	02JAN16	1 time	More than 7 ounces or more than 1 fillet or more than 14 pieces of sushi	No	No	< 30 minutes / day	Light	Week 12	02	Entered	41	Male	06NOV15	109	MF4637	<250 mg/day	No	Yes	>=250 mg/day	No	Yes	Yes	Yes	Yes
		Walking		Salmon	None	None	02_002	Visit 4	Yes	9	60	03JAN16	1 time	More than 7 ounces or more than 1 fillet or more than 14 pieces of sushi	No	No	< 30 minutes / day	Light	Week 12	02	Entered	41	Male	06NOV15	109	MF4637	<250 mg/day	No	Yes	>=250 mg/day	No	Yes	Yes	Yes	Yes
		Walking		Salmon	None	None	02_002	Visit 4	Yes	9	61	04JAN16	1 time	More than 7 ounces or more than 1 fillet or more than 14 pieces of sushi	No	No	< 30 minutes / day	Light	Week 12	02	Entered	41	Male	06NOV15	109	MF4637	<250 mg/day	No	Yes	>=250 mg/day	No	Yes	Yes	Yes	Yes
		Walking		Salmon	None	None	02_002	Visit 4	Yes	9	62	05JAN16	1 time	More than 7 ounces or more than 1 fillet or more than 14 pieces of sushi	No	No	< 30 minutes / day	Light	Week 12	02	Entered	41	Male	06NOV15	109	MF4637	<250 mg/day	No	Yes	>=250 mg/day	No	Yes	Yes	Yes	Yes
		Walking		Tuna	1 time	None	02_002	Visit 4	Yes	10	63	06JAN16	1 time	More than 7 ounces or more than 1 fillet or more than 14 pieces of sushi	No	No	< 30 minutes / day	Light	Week 12	02	Entered	41	Male	06NOV15	109	MF4637	<250 mg/day	No	Yes	>=250 mg/day	No	Yes	Yes	Yes	Yes
		Walking		Tuna	1 time	None	02_002	Visit 4	Yes	10	64	07JAN16	1 time	More than 7 ounces or more than 1 fillet or more than 14 pieces of sushi	No	No	< 30 minutes / day	Light	Week 12	02	Entered	41	Male	06NOV15	109	MF4637	<250 mg/day	No	Yes	>=250 mg/day	No	Yes	Yes	Yes	Yes
		Walking		Tuna	1 time	None	02_002	Visit 4	Yes	10	65	08JAN16	1 time	More than 7 ounces or more than 1 fillet or more than 14 pieces of sushi	No	No	< 30 minutes / day	Light	Week 12	02	Entered	41	Male	06NOV15	109	MF4637	<250 mg/day	No	Yes	>=250 mg/day	No	Yes	Yes	Yes	Yes
		Walking		Tuna	1 time	None	02_002	Visit 4	Yes	10	66	09JAN16	1 time	More than 7 ounces or more than 1 fillet or more than 14 pieces of sushi	No	No	< 30 minutes / day	Light	Week 12	02	Entered	41	Male	06NOV15	109	MF4637	<250 mg/day	No	Yes	>=250 mg/day	No	Yes	Yes	Yes	Yes
		Walking		Tuna	1 time	None	02_002	Visit 4	Yes	10	67	10JAN16	1 time	More than 7 ounces or more than 1 fillet or more than 14 pieces of sushi	No	No	< 30 minutes / day	Light	Week 12	02	Entered	41	Male	06NOV15	109	MF4637	<250 mg/day	No	Yes	>=250 mg/day	No	Yes	Yes	Yes	Yes
		Walking		Tuna	1 time	None	02_002	Visit 4	Yes	10	68	11JAN16	1 time	More than 7 ounces or more than 1 fillet or more than 14 pieces of sushi	No	No	< 30 minutes / day	Light	Week 12	02	Entered	41	Male	06NOV15	109	MF4637	<250 mg/day	No	Yes	>=250 mg/day	No	Yes	Yes	Yes	Yes
		Walking		Tuna	1 time	None	02_002	Visit 4	Yes	10	69	12JAN16	1 time	More than 7 ounces or more than 1 fillet or more than 14 pieces of sushi	No	No	< 30 minutes / day	Light	Week 12	02	Entered	41	Male	06NOV15	109	MF4637	<250 mg/day	No	Yes	>=250 mg/day	No	Yes	Yes	Yes	Yes
		Walking		Salmon	1x	0	02_002	Visit 4	Yes	11	70	13JAN16	1 time	More than 7 ounces or more than 1 fillet or more than 14 pieces of sushi	No	No	< 30 minutes / day	Light	Week 12	02	Entered	41	Male	06NOV15	109	MF4637	<250 mg/day	No	Yes	>=250 mg/day	No	Yes	Yes	Yes	Yes
		Walking		Salmon	1x	0	02_002	Visit 4	Yes	11	71	14JAN16	1 time	More than 7 ounces or more than 1 fillet or more than 14 pieces of sushi	No	No	< 30 minutes / day	Light	Week 12	02	Entered	41	Male	06NOV15	109	MF4637	<250 mg/day	No	Yes	>=250 mg/day	No	Yes	Yes	Yes	Yes
		Walking		Salmon	1x	0	02_002	Visit 4	Yes	11	72	15JAN16	1 time	More than 7 ounces or more than 1 fillet or more than 14 pieces of sushi	No	No	< 30 minutes / day	Light	Week 12	02	Entered	41	Male	06NOV15	109	MF4637	<250 mg/day	No	Yes	>=250 mg/day	No	Yes	Yes	Yes	Yes
		Walking		Salmon	1x	0	02_002	Visit 4	Yes	11	73	16JAN16	1 time	More than 7 ounces or more than 1 fillet or more than 14 pieces of sushi	No	No	< 30 minutes / day	Light	Week 12	02	Entered	41	Male	06NOV15	109	MF4637	<250 mg/day	No	Yes	>=250 mg/day	No	Yes	Yes	Yes	Yes
		Walking		Salmon	1x	0	02_002	Visit 4	Yes	11	74	17JAN16	1 time	More than 7 ounces or more than 1 fillet or more than 14 pieces of sushi	No	No	< 30 minutes / day	Light	Week 12	02	Entered	41	Male	06NOV15	109	MF4637	<250 mg/day	No	Yes	>=250 mg/day	No	Yes	Yes	Yes	Yes
		Walking		Salmon	1x	0	02_002	Visit 4	Yes	11	75	18JAN16	1 time	More than 7 ounces or more than 1 fillet or more than 14 pieces of sushi	No	No	< 30 minutes / day	Light	Week 12	02	Entered	41	Male	06NOV15	109	MF4637	<250 mg/day	No	Yes	>=250 mg/day	No	Yes	Yes	Yes	Yes
		Walking		Salmon	1x	0	02_002	Visit 4	Yes	11	76	19JAN16	1 time	More than 7 ounces or more than 1 fillet or more than 14 pieces of sushi	No	No	< 30 minutes / day	Light	Week 12	02	Entered	41	Male	06NOV15	109	MF4637	<250 mg/day	No	Yes	>=250 mg/day	No	Yes	Yes	Yes	Yes
		Walking, playing in the snow		Grilled tilapia	0X	1X	02_002	Visit 4	Yes	12	77	20JAN16	1 time	More than 7 ounces or more than 1 fillet or more than 14 pieces of sushi	No	No	30 or more minutes / day	Moderate	Week 12	02	Entered	41	Male	06NOV15	109	MF4637	<250 mg/day	No	Yes	>=250 mg/day	No	Yes	Yes	Yes	Yes
		Walking, playing in the snow		Grilled tilapia	0X	1X	02_002	Visit 4	Yes	12	78	21JAN16	1 time	More than 7 ounces or more than 1 fillet or more than 14 pieces of sushi	No	No	30 or more minutes / day	Moderate	Week 12	02	Entered	41	Male	06NOV15	109	MF4637	<250 mg/day	No	Yes	>=250 mg/day	No	Yes	Yes	Yes	Yes
		Walking, playing in the snow		Grilled tilapia	0X	1X	02_002	Visit 4	Yes	12	79	22JAN16	1 time	More than 7 ounces or more than 1 fillet or more than 14 pieces of sushi	No	No	30 or more minutes / day	Moderate	Week 12	02	Entered	41	Male	06NOV15	109	MF4637	<250 mg/day	No	Yes	>=250 mg/day	No	Yes	Yes	Yes	Yes
		Walking, playing in the snow		Grilled tilapia	0X	1X	02_002	Visit 4	Yes	12	80	23JAN16	1 time	More than 7 ounces or more than 1 fillet or more than 14 pieces of sushi	No	No	30 or more minutes / day	Moderate	Week 12	02	Entered	41	Male	06NOV15	109	MF4637	<250 mg/day	No	Yes	>=250 mg/day	No	Yes	Yes	Yes	Yes
		Walking, playing in the snow		Grilled tilapia	0X	1X	02_002	Visit 4	Yes	12	81	24JAN16	1 time	More than 7 ounces or more than 1 fillet or more than 14 pieces of sushi	No	No	30 or more minutes / day	Moderate	Week 12	02	Entered	41	Male	06NOV15	109	MF4637	<250 mg/day	No	Yes	>=250 mg/day	No	Yes	Yes	Yes	Yes
		Walking, playing in the snow		Grilled tilapia	0X	1X	02_002	Visit 4	Yes	12	82	25JAN16	1 time	More than 7 ounces or more than 1 fillet or more than 14 pieces of sushi	No	No	30 or more minutes / day	Moderate	Week 12	02	Entered	41	Male	06NOV15	109	MF4637	<250 mg/day	No	Yes	>=250 mg/day	No	Yes	Yes	Yes	Yes
		Walking, playing in the snow		Grilled tilapia	0X	1X	02_002	Visit 4	Yes	12	83	26JAN16	1 time	More than 7 ounces or more than 1 fillet or more than 14 pieces of sushi	No	No	30 or more minutes / day	Moderate	Week 12	02	Entered	41	Male	06NOV15	109	MF4637	<250 mg/day	No	Yes	>=250 mg/day	No	Yes	Yes	Yes	Yes
Vegetable fruit only diet plus beans		Walking		Shrimp and Tuna	1X	0X	02_002	Visit 5	Yes	13	84	27JAN16	2 times	More than 7 ounces or more than 1 fillet or more than 14 pieces of sushi	Yes	No	< 30 minutes / day	Light	Week 24	02	Entered	41	Male	06NOV15	109	MF4637	<250 mg/day	No	Yes	>=250 mg/day	No	Yes	Yes	Yes	Yes
Vegetable fruit only diet plus beans		Walking		Shrimp and Tuna	1X	0X	02_002	Visit 5	Yes	13	85	28JAN16	2 times	More than 7 ounces or more than 1 fillet or more than 14 pieces of sushi	Yes	No	< 30 minutes / day	Light	Week 24	02	Entered	41	Male	06NOV15	109	MF4637	<250 mg/day	No	Yes	>=250 mg/day	No	Yes	Yes	Yes	Yes
Vegetable fruit only diet plus beans		Walking		Shrimp and Tuna	1X	0X	02_002	Visit 5	Yes	13	86	29JAN16	2 times	More than 7 ounces or more than 1 fillet or more than 14 pieces of sushi	Yes	No	< 30 minutes / day	Light	Week 24	02	Entered	41	Male	06NOV15	109	MF4637	<250 mg/day	No	Yes	>=250 mg/day	No	Yes	Yes	Yes	Yes
Vegetable fruit only diet plus beans		Walking		Shrimp and Tuna	1X	0X	02_002	Visit 5	Yes	13	87	30JAN16	2 times	More than 7 ounces or more than 1 fillet or more than 14 pieces of sushi	Yes	No	< 30 minutes / day	Light	Week 24	02	Entered	41	Male	06NOV15	109	MF4637	<250 mg/day	No	Yes	>=250 mg/day	No	Yes	Yes	Yes	Yes
Vegetable fruit only diet plus beans		Walking		Shrimp and Tuna	1X	0X	02_002	Visit 5	Yes	13	88	31JAN16	2 times	More than 7 ounces or more than 1 fillet or more than 14 pieces of sushi	Yes	No	< 30 minutes / day	Light	Week 24	02	Entered	41	Male	06NOV15	109	MF4637	<250 mg/day	No	Yes	>=250 mg/day	No	Yes	Yes	Yes	Yes
Vegetable fruit only diet plus beans		Walking	Started eating vegetables and fruit only + beans	Shrimp and Tuna	1X	0X	02_002	Visit 5	Yes	13	89	01FEB16	2 times	More than 7 ounces or more than 1 fillet or more than 14 pieces of sushi	Yes	No	< 30 minutes / day	Light	Week 24	02	Entered	41	Male	06NOV15	109	MF4637	<250 mg/day	No	Yes	>=250 mg/day	No	Yes	Yes	Yes	Yes
Vegetable fruit only diet plus beans		Walking		Shrimp and Tuna	1X	0X	02_002	Visit 5	Yes	13	90	02FEB16	2 times	More than 7 ounces or more than 1 fillet or more than 14 pieces of sushi	Yes	No	< 30 minutes / day	Light	Week 24	02	Entered	41	Male	06NOV15	109	MF4637	<250 mg/day	No	Yes	>=250 mg/day	No	Yes	Yes	Yes	Yes
		Walking		Shrimp	1x	0x	02_002	Visit 5	Yes	14	91	03FEB16	1 time	More than 7 ounces or more than 1 fillet or more than 14 pieces of sushi	No	No	< 30 minutes / day	Light	Week 24	02	Entered	41	Male	06NOV15	109	MF4637	<250 mg/day	No	Yes	>=250 mg/day	No	Yes	Yes	Yes	Yes
		Walking		Shrimp	1x	0x	02_002	Visit 5	Yes	14	92	04FEB16	1 time	More than 7 ounces or more than 1 fillet or more than 14 pieces of sushi	No	No	< 30 minutes / day	Light	Week 24	02	Entered	41	Male	06NOV15	109	MF4637	<250 mg/day	No	Yes	>=250 mg/day	No	Yes	Yes	Yes	Yes
		Walking		Shrimp	1x	0x	02_002	Visit 5	Yes	14	93	05FEB16	1 time	More than 7 ounces or more than 1 fillet or more than 14 pieces of sushi	No	No	< 30 minutes / day	Light	Week 24	02	Entered	41	Male	06NOV15	109	MF4637	<250 mg/day	No	Yes	>=250 mg/day	No	Yes	Yes	Yes	Yes
		Walking		Shrimp	1x	0x	02_002	Visit 5	Yes	14	94	06FEB16	1 time	More than 7 ounces or more than 1 fillet or more than 14 pieces of sushi	No	No	< 30 minutes / day	Light	Week 24	02	Entered	41	Male	06NOV15	109	MF4637	<250 mg/day	No	Yes	>=250 mg/day	No	Yes	Yes	Yes	Yes
		Walking		Shrimp	1x	0x	02_002	Visit 5	Yes	14	95	07FEB16	1 time	More than 7 ounces or more than 1 fillet or more than 14 pieces of sushi	No	No	< 30 minutes / day	Light	Week 24	02	Entered	41	Male	06NOV15	109	MF4637	<250 mg/day	No	Yes	>=250 mg/day	No	Yes	Yes	Yes	Yes
		Walking		Shrimp	1x	0x	02_002	Visit 5	Yes	14	96	08FEB16	1 time	More than 7 ounces or more than 1 fillet or more than 14 pieces of sushi	No	No	< 30 minutes / day	Light	Week 24	02	Entered	41	Male	06NOV15	109	MF4637	<250 mg/day	No	Yes	>=250 mg/day	No	Yes	Yes	Yes	Yes
		Walking		Shrimp	1x	0x	02_002	Visit 5	Yes	14	97	09FEB16	1 time	More than 7 ounces or more than 1 fillet or more than 14 pieces of sushi	No	No	< 30 minutes / day	Light	Week 24	02	Entered	41	Male	06NOV15	109	MF4637	<250 mg/day	No	Yes	>=250 mg/day	No	Yes	Yes	Yes	Yes
		Walking		Shrimp	0x	0x	02_002	Visit 5	Yes	15	98	10FEB16	2 times	More than 7 ounces or more than 1 fillet or more than 14 pieces of sushi	No	No	< 30 minutes / day	Light	Week 24	02	Entered	41	Male	06NOV15	109	MF4637	<250 mg/day	No	Yes	>=250 mg/day	No	Yes	Yes	Yes	Yes
		Walking		Shrimp	0x	0x	02_002	Visit 5	Yes	15	99	11FEB16	2 times	More than 7 ounces or more than 1 fillet or more than 14 pieces of sushi	No	No	< 30 minutes / day	Light	Week 24	02	Entered	41	Male	06NOV15	109	MF4637	<250 mg/day	No	Yes	>=250 mg/day	No	Yes	Yes	Yes	Yes
		Walking		Shrimp	0x	0x	02_002	Visit 5	Yes	15	100	12FEB16	2 times	More than 7 ounces or more than 1 fillet or more than 14 pieces of sushi	No	No	< 30 minutes / day	Light	Week 24	02	Entered	41	Male	06NOV15	109	MF4637	<250 mg/day	No	Yes	>=250 mg/day	No	Yes	Yes	Yes	Yes
		Walking		Shrimp	0x	0x	02_002	Visit 5	Yes	15	101	13FEB16	2 times	More than 7 ounces or more than 1 fillet or more than 14 pieces of sushi	No	No	< 30 minutes / day	Light	Week 24	02	Entered	41	Male	06NOV15	109	MF4637	<250 mg/day	No	Yes	>=250 mg/day	No	Yes	Yes	Yes	Yes
		Walking		Shrimp	0x	0x	02_002	Visit 5	Yes	15	102	14FEB16	2 times	More than 7 ounces or more than 1 fillet or more than 14 pieces of sushi	No	No	< 30 minutes / day	Light	Week 24	02	Entered	41	Male	06NOV15	109	MF4637	<250 mg/day	No	Yes	>=250 mg/day	No	Yes	Yes	Yes	Yes
		Walking		Shrimp	0x	0x	02_002	Visit 5	Yes	15	103	15FEB16	2 times	More than 7 ounces or more than 1 fillet or more than 14 pieces of sushi	No	No	< 30 minutes / day	Light	Week 24	02	Entered	41	Male	06NOV15	109	MF4637	<250 mg/day	No	Yes	>=250 mg/day	No	Yes	Yes	Yes	Yes
		Walking		Shrimp	0x	0x	02_002	Visit 5	Yes	15	104	16FEB16	2 times	More than 7 ounces or more than 1 fillet or more than 14 pieces of sushi	No	No	< 30 minutes / day	Light	Week 24	02	Entered	41	Male	06NOV15	109	MF4637	<250 mg/day	No	Yes	>=250 mg/day	No	Yes	Yes	Yes	Yes
		Walking		Talapi, Shrimp, Salmon	1x	0x	02_002	Visit 5	Yes	16	105	17FEB16	More than 2 times	More than 7 ounces or more than 1 fillet or more than 14 pieces of sushi	No	No	30 or more minutes / day	Moderate	Week 24	02	Entered	41	Male	06NOV15	109	MF4637	<250 mg/day	No	Yes	>=250 mg/day	No	Yes	Yes	Yes	Yes
		Walking		Talapi, Shrimp, Salmon	1x	0x	02_002	Visit 5	Yes	16	106	18FEB16	More than 2 times	More than 7 ounces or more than 1 fillet or more than 14 pieces of sushi	No	No	30 or more minutes / day	Moderate	Week 24	02	Entered	41	Male	06NOV15	109	MF4637	<250 mg/day	No	Yes	>=250 mg/day	No	Yes	Yes	Yes	Yes
		Walking		Talapi, Shrimp, Salmon	1x	0x	02_002	Visit 5	Yes	16	107	19FEB16	More than 2 times	More than 7 ounces or more than 1 fillet or more than 14 pieces of sushi	No	No	30 or more minutes / day	Moderate	Week 24	02	Entered	41	Male	06NOV15	109	MF4637	<250 mg/day	No	Yes	>=250 mg/day	No	Yes	Yes	Yes	Yes
		Walking		Talapi, Shrimp, Salmon	1x	0x	02_002	Visit 5	Yes	16	108	20FEB16	More than 2 times	More than 7 ounces or more than 1 fillet or more than 14 pieces of sushi	No	No	30 or more minutes / day	Moderate	Week 24	02	Entered	41	Male	06NOV15	109	MF4637	<250 mg/day	No	Yes	>=250 mg/day	No	Yes	Yes	Yes	Yes
		Walking		Talapi, Shrimp, Salmon	1x	0x	02_002	Visit 5	Yes	16	109	21FEB16	More than 2 times	More than 7 ounces or more than 1 fillet or more than 14 pieces of sushi	No	No	30 or more minutes / day	Moderate	Week 24	02	Entered	41	Male	06NOV15	109	MF4637	<250 mg/day	No	Yes	>=250 mg/day	No	Yes	Yes	Yes	Yes
		Walking		Talapi, Shrimp, Salmon	1x	0x	02_002	Visit 5	Yes	16	110	22FEB16	More than 2 times	More than 7 ounces or more than 1 fillet or more than 14 pieces of sushi	No	No	30 or more minutes / day	Moderate	Week 24	02	Entered	41	Male	06NOV15	109	MF4637	<250 mg/day	No	Yes	>=250 mg/day	No	Yes	Yes	Yes	Yes
		Walking		Talapi, Shrimp, Salmon	1x	0x	02_002	Visit 5	Yes	16	111	23FEB16	More than 2 times	More than 7 ounces or more than 1 fillet or more than 14 pieces of sushi	No	No	30 or more minutes / day	Moderate	Week 24	02	Entered	41	Male	06NOV15	109	MF4637	<250 mg/day	No	Yes	>=250 mg/day	No	Yes	Yes	Yes	Yes
		Walking		Shrimp	0X	Raw almonds 4 days	02_002	Visit 5	Yes	17	112	24FEB16	1 time	More than 7 ounces or more than 1 fillet or more than 14 pieces of sushi	No	No	< 30 minutes / day	Light	Week 24	02	Entered	41	Male	06NOV15	109	MF4637	<250 mg/day	No	Yes	>=250 mg/day	No	Yes	Yes	Yes	Yes
		Walking		Shrimp	0X	Raw almonds 4 days	02_002	Visit 5	Yes	17	113	25FEB16	1 time	More than 7 ounces or more than 1 fillet or more than 14 pieces of sushi	No	No	< 30 minutes / day	Light	Week 24	02	Entered	41	Male	06NOV15	109	MF4637	<250 mg/day	No	Yes	>=250 mg/day	No	Yes	Yes	Yes	Yes
		Walking		Shrimp	0X	Raw almonds 4 days	02_002	Visit 5	Yes	17	114	26FEB16	1 time	More than 7 ounces or more than 1 fillet or more than 14 pieces of sushi	No	No	< 30 minutes / day	Light	Week 24	02	Entered	41	Male	06NOV15	109	MF4637	<250 mg/day	No	Yes	>=250 mg/day	No	Yes	Yes	Yes	Yes
		Walking		Shrimp	0X	Raw almonds 4 days	02_002	Visit 5	Yes	17	115	27FEB16	1 time	More than 7 ounces or more than 1 fillet or more than 14 pieces of sushi	No	No	< 30 minutes / day	Light	Week 24	02	Entered	41	Male	06NOV15	109	MF4637	<250 mg/day	No	Yes	>=250 mg/day	No	Yes	Yes	Yes	Yes
		Walking		Shrimp	0X	Raw almonds 4 days	02_002	Visit 5	Yes	17	116	28FEB16	1 time	More than 7 ounces or more than 1 fillet or more than 14 pieces of sushi	No	No	< 30 minutes / day	Light	Week 24	02	Entered	41	Male	06NOV15	109	MF4637	<250 mg/day	No	Yes	>=250 mg/day	No	Yes	Yes	Yes	Yes
		Walking		Shrimp	0X	Raw almonds 4 days	02_002	Visit 5	Yes	17	117	29FEB16	1 time	More than 7 ounces or more than 1 fillet or more than 14 pieces of sushi	No	No	< 30 minutes / day	Light	Week 24	02	Entered	41	Male	06NOV15	109	MF4637	<250 mg/day	No	Yes	>=250 mg/day	No	Yes	Yes	Yes	Yes
		Walking		Shrimp	0X	Raw almonds 4 days	02_002	Visit 5	Yes	17	118	01MAR16	1 time	More than 7 ounces or more than 1 fillet or more than 14 pieces of sushi	No	No	< 30 minutes / day	Light	Week 24	02	Entered	41	Male	06NOV15	109	MF4637	<250 mg/day	No	Yes	>=250 mg/day	No	Yes	Yes	Yes	Yes
		Walking			0X	Raw almonds 3 days	02_002	Visit 5	Yes	18	119	02MAR16	0 (not at all) (if 0, skip questions 2 and 3)		No	No	< 30 minutes / day	Light	Week 24	02	Entered	41	Male	06NOV15	109	MF4637	<250 mg/day	No	Yes	>=250 mg/day	No	Yes	Yes	Yes	Yes
		Walking			0X	Raw almonds 3 days	02_002	Visit 5	Yes	18	120	03MAR16	0 (not at all) (if 0, skip questions 2 and 3)		No	No	< 30 minutes / day	Light	Week 24	02	Entered	41	Male	06NOV15	109	MF4637	<250 mg/day	No	Yes	>=250 mg/day	No	Yes	Yes	Yes	Yes
		Walking			0X	Raw almonds 3 days	02_002	Visit 5	Yes	18	121	04MAR16	0 (not at all) (if 0, skip questions 2 and 3)		No	No	< 30 minutes / day	Light	Week 24	02	Entered	41	Male	06NOV15	109	MF4637	<250 mg/day	No	Yes	>=250 mg/day	No	Yes	Yes	Yes	Yes
		Walking			0X	Raw almonds 3 days	02_002	Visit 5	Yes	18	122	05MAR16	0 (not at all) (if 0, skip questions 2 and 3)		No	No	< 30 minutes / day	Light	Week 24	02	Entered	41	Male	06NOV15	109	MF4637	<250 mg/day	No	Yes	>=250 mg/day	No	Yes	Yes	Yes	Yes
		Walking			0X	Raw almonds 3 days	02_002	Visit 5	Yes	18	123	06MAR16	0 (not at all) (if 0, skip questions 2 and 3)		No	No	< 30 minutes / day	Light	Week 24	02	Entered	41	Male	06NOV15	109	MF4637	<250 mg/day	No	Yes	>=250 mg/day	No	Yes	Yes	Yes	Yes
		Walking			0X	Raw almonds 3 days	02_002	Visit 5	Yes	18	124	07MAR16	0 (not at all) (if 0, skip questions 2 and 3)		No	No	< 30 minutes / day	Light	Week 24	02	Entered	41	Male	06NOV15	109	MF4637	<250 mg/day	No	Yes	>=250 mg/day	No	Yes	Yes	Yes	Yes
		Walking			0X	Raw almonds 3 days	02_002	Visit 5	Yes	18	125	08MAR16	0 (not at all) (if 0, skip questions 2 and 3)		No	No	< 30 minutes / day	Light	Week 24	02	Entered	41	Male	06NOV15	109	MF4637	<250 mg/day	No	Yes	>=250 mg/day	No	Yes	Yes	Yes	Yes
		Walking		Shrimp	0X	4X raw almonds	02_002	Visit 5	Yes	19	126	09MAR16	1 time	2 to 7 ounces or about 1 fillet or 4-14 pieces of sushi	No	No	< 30 minutes / day	Light	Week 24	02	Entered	41	Male	06NOV15	109	MF4637	<250 mg/day	No	Yes	>=250 mg/day	No	Yes	Yes	Yes	Yes
		Walking		Shrimp	0X	4X raw almonds	02_002	Visit 5	Yes	19	127	10MAR16	1 time	2 to 7 ounces or about 1 fillet or 4-14 pieces of sushi	No	No	< 30 minutes / day	Light	Week 24	02	Entered	41	Male	06NOV15	109	MF4637	<250 mg/day	No	Yes	>=250 mg/day	No	Yes	Yes	Yes	Yes
		Walking		Shrimp	0X	4X raw almonds	02_002	Visit 5	Yes	19	128	11MAR16	1 time	2 to 7 ounces or about 1 fillet or 4-14 pieces of sushi	No	No	< 30 minutes / day	Light	Week 24	02	Entered	41	Male	06NOV15	109	MF4637	<250 mg/day	No	Yes	>=250 mg/day	No	Yes	Yes	Yes	Yes
		Walking		Shrimp	0X	4X raw almonds	02_002	Visit 5	Yes	19	129	12MAR16	1 time	2 to 7 ounces or about 1 fillet or 4-14 pieces of sushi	No	No	< 30 minutes / day	Light	Week 24	02	Entered	41	Male	06NOV15	109	MF4637	<250 mg/day	No	Yes	>=250 mg/day	No	Yes	Yes	Yes	Yes
		Walking		Shrimp	0X	4X raw almonds	02_002	Visit 5	Yes	19	130	13MAR16	1 time	2 to 7 ounces or about 1 fillet or 4-14 pieces of sushi	No	No	< 30 minutes / day	Light	Week 24	02	Entered	41	Male	06NOV15	109	MF4637	<250 mg/day	No	Yes	>=250 mg/day	No	Yes	Yes	Yes	Yes
		Walking		Shrimp	0X	4X raw almonds	02_002	Visit 5	Yes	19	131	14MAR16	1 time	2 to 7 ounces or about 1 fillet or 4-14 pieces of sushi	No	No	< 30 minutes / day	Light	Week 24	02	Entered	41	Male	06NOV15	109	MF4637	<250 mg/day	No	Yes	>=250 mg/day	No	Yes	Yes	Yes	Yes
		Walking		Shrimp	0X	4X raw almonds	02_002	Visit 5	Yes	19	132	15MAR16	1 time	2 to 7 ounces or about 1 fillet or 4-14 pieces of sushi	No	No	< 30 minutes / day	Light	Week 24	02	Entered	41	Male	06NOV15	109	MF4637	<250 mg/day	No	Yes	>=250 mg/day	No	Yes	Yes	Yes	Yes
		Walking			1X	5X raw almonds	02_002	Visit 5	Yes	20	133	16MAR16	0 (not at all) (if 0, skip questions 2 and 3)		No	No	< 30 minutes / day	Light	Week 24	02	Entered	41	Male	06NOV15	109	MF4637	<250 mg/day	No	Yes	>=250 mg/day	No	Yes	Yes	Yes	Yes
		Walking			1X	5X raw almonds	02_002	Visit 5	Yes	20	134	17MAR16	0 (not at all) (if 0, skip questions 2 and 3)		No	No	< 30 minutes / day	Light	Week 24	02	Entered	41	Male	06NOV15	109	MF4637	<250 mg/day	No	Yes	>=250 mg/day	No	Yes	Yes	Yes	Yes
		Walking			1X	5X raw almonds	02_002	Visit 5	Yes	20	135	18MAR16	0 (not at all) (if 0, skip questions 2 and 3)		No	No	< 30 minutes / day	Light	Week 24	02	Entered	41	Male	06NOV15	109	MF4637	<250 mg/day	No	Yes	>=250 mg/day	No	Yes	Yes	Yes	Yes
		Walking			1X	5X raw almonds	02_002	Visit 5	Yes	20	136	19MAR16	0 (not at all) (if 0, skip questions 2 and 3)		No	No	< 30 minutes / day	Light	Week 24	02	Entered	41	Male	06NOV15	109	MF4637	<250 mg/day	No	Yes	>=250 mg/day	No	Yes	Yes	Yes	Yes
		Walking			1X	5X raw almonds	02_002	Visit 5	Yes	20	137	20MAR16	0 (not at all) (if 0, skip questions 2 and 3)		No	No	< 30 minutes / day	Light	Week 24	02	Entered	41	Male	06NOV15	109	MF4637	<250 mg/day	No	Yes	>=250 mg/day	No	Yes	Yes	Yes	Yes
		Walking			1X	5X raw almonds	02_002	Visit 5	Yes	20	138	21MAR16	0 (not at all) (if 0, skip questions 2 and 3)		No	No	< 30 minutes / day	Light	Week 24	02	Entered	41	Male	06NOV15	109	MF4637	<250 mg/day	No	Yes	>=250 mg/day	No	Yes	Yes	Yes	Yes
		Walking			1X	5X raw almonds	02_002	Visit 5	Yes	20	139	22MAR16	0 (not at all) (if 0, skip questions 2 and 3)		No	No	< 30 minutes / day	Light	Week 24	02	Entered	41	Male	06NOV15	109	MF4637	<250 mg/day	No	Yes	>=250 mg/day	No	Yes	Yes	Yes	Yes
		Walking		Shrimp, Tuna	1X	Raw almonds 5x	02_002	Visit 5	Yes	21	140	23MAR16	2 times	2 to 7 ounces or about 1 fillet or 4-14 pieces of sushi	No	No	< 30 minutes / day	Light	Week 24	02	Entered	41	Male	06NOV15	109	MF4637	<250 mg/day	No	Yes	>=250 mg/day	No	Yes	Yes	Yes	Yes
		Walking		Shrimp, Tuna	1X	Raw almonds 5x	02_002	Visit 5	Yes	21	141	24MAR16	2 times	2 to 7 ounces or about 1 fillet or 4-14 pieces of sushi	No	No	< 30 minutes / day	Light	Week 24	02	Entered	41	Male	06NOV15	109	MF4637	<250 mg/day	No	Yes	>=250 mg/day	No	Yes	Yes	Yes	Yes
		Walking		Shrimp, Tuna	1X	Raw almonds 5x	02_002	Visit 5	Yes	21	142	25MAR16	2 times	2 to 7 ounces or about 1 fillet or 4-14 pieces of sushi	No	No	< 30 minutes / day	Light	Week 24	02	Entered	41	Male	06NOV15	109	MF4637	<250 mg/day	No	Yes	>=250 mg/day	No	Yes	Yes	Yes	Yes
		Walking		Shrimp, Tuna	1X	Raw almonds 5x	02_002	Visit 5	Yes	21	143	26MAR16	2 times	2 to 7 ounces or about 1 fillet or 4-14 pieces of sushi	No	No	< 30 minutes / day	Light	Week 24	02	Entered	41	Male	06NOV15	109	MF4637	<250 mg/day	No	Yes	>=250 mg/day	No	Yes	Yes	Yes	Yes
		Walking		Shrimp, Tuna	1X	Raw almonds 5x	02_002	Visit 5	Yes	21	144	27MAR16	2 times	2 to 7 ounces or about 1 fillet or 4-14 pieces of sushi	No	No	< 30 minutes / day	Light	Week 24	02	Entered	41	Male	06NOV15	109	MF4637	<250 mg/day	No	Yes	>=250 mg/day	No	Yes	Yes	Yes	Yes
		Walking		Shrimp, Tuna	1X	Raw almonds 5x	02_002	Visit 5	Yes	21	145	28MAR16	2 times	2 to 7 ounces or about 1 fillet or 4-14 pieces of sushi	No	No	< 30 minutes / day	Light	Week 24	02	Entered	41	Male	06NOV15	109	MF4637	<250 mg/day	No	Yes	>=250 mg/day	No	Yes	Yes	Yes	Yes
		Walking		Shrimp, Tuna	1X	Raw almonds 5x	02_002	Visit 5	Yes	21	146	29MAR16	2 times	2 to 7 ounces or about 1 fillet or 4-14 pieces of sushi	No	No	< 30 minutes / day	Light	Week 24	02	Entered	41	Male	06NOV15	109	MF4637	<250 mg/day	No	Yes	>=250 mg/day	No	Yes	Yes	Yes	Yes
		Walking		Shrimp	0X	4X raw almonds	02_002	Visit 5	Yes	22	147	30MAR16	2 times	More than 7 ounces or more than 1 fillet or more than 14 pieces of sushi	No	No	< 30 minutes / day	Light	Week 24	02	Entered	41	Male	06NOV15	109	MF4637	<250 mg/day	No	Yes	>=250 mg/day	No	Yes	Yes	Yes	Yes
		Walking		Shrimp	0X	4X raw almonds	02_002	Visit 5	Yes	22	148	31MAR16	2 times	More than 7 ounces or more than 1 fillet or more than 14 pieces of sushi	No	No	< 30 minutes / day	Light	Week 24	02	Entered	41	Male	06NOV15	109	MF4637	<250 mg/day	No	Yes	>=250 mg/day	No	Yes	Yes	Yes	Yes
		Walking		Shrimp	0X	4X raw almonds	02_002	Visit 5	Yes	22	149	01APR16	2 times	More than 7 ounces or more than 1 fillet or more than 14 pieces of sushi	No	No	< 30 minutes / day	Light	Week 24	02	Entered	41	Male	06NOV15	109	MF4637	<250 mg/day	No	Yes	>=250 mg/day	No	Yes	Yes	Yes	Yes
		Walking		Shrimp	0X	4X raw almonds	02_002	Visit 5	Yes	22	150	02APR16	2 times	More than 7 ounces or more than 1 fillet or more than 14 pieces of sushi	No	No	< 30 minutes / day	Light	Week 24	02	Entered	41	Male	06NOV15	109	MF4637	<250 mg/day	No	Yes	>=250 mg/day	No	Yes	Yes	Yes	Yes
		Walking		Shrimp	0X	4X raw almonds	02_002	Visit 5	Yes	22	151	03APR16	2 times	More than 7 ounces or more than 1 fillet or more than 14 pieces of sushi	No	No	< 30 minutes / day	Light	Week 24	02	Entered	41	Male	06NOV15	109	MF4637	<250 mg/day	No	Yes	>=250 mg/day	No	Yes	Yes	Yes	Yes
		Walking		Shrimp	0X	4X raw almonds	02_002	Visit 5	Yes	22	152	04APR16	2 times	More than 7 ounces or more than 1 fillet or more than 14 pieces of sushi	No	No	< 30 minutes / day	Light	Week 24	02	Entered	41	Male	06NOV15	109	MF4637	<250 mg/day	No	Yes	>=250 mg/day	No	Yes	Yes	Yes	Yes
		Walking		Shrimp	0X	4X raw almonds	02_002	Visit 5	Yes	22	153	05APR16	2 times	More than 7 ounces or more than 1 fillet or more than 14 pieces of sushi	No	No	< 30 minutes / day	Light	Week 24	02	Entered	41	Male	06NOV15	109	MF4637	<250 mg/day	No	Yes	>=250 mg/day	No	Yes	Yes	Yes	Yes
		Walking		Shrimp	0X	4X raw almonds	02_002	Visit 5	Yes	23	154	06APR16	1 time	More than 7 ounces or more than 1 fillet or more than 14 pieces of sushi	No	No	< 30 minutes / day	Light	Week 24	02	Entered	41	Male	06NOV15	109	MF4637	<250 mg/day	No	Yes	>=250 mg/day	No	Yes	Yes	Yes	Yes
		Walking		Shrimp	0X	4X raw almonds	02_002	Visit 5	Yes	23	155	07APR16	1 time	More than 7 ounces or more than 1 fillet or more than 14 pieces of sushi	No	No	< 30 minutes / day	Light	Week 24	02	Entered	41	Male	06NOV15	109	MF4637	<250 mg/day	No	Yes	>=250 mg/day	No	Yes	Yes	Yes	Yes
		Walking		Shrimp	0X	4X raw almonds	02_002	Visit 5	Yes	23	156	08APR16	1 time	More than 7 ounces or more than 1 fillet or more than 14 pieces of sushi	No	No	< 30 minutes / day	Light	Week 24	02	Entered	41	Male	06NOV15	109	MF4637	<250 mg/day	No	Yes	>=250 mg/day	No	Yes	Yes	Yes	Yes
		Walking		Shrimp	0X	4X raw almonds	02_002	Visit 5	Yes	23	157	09APR16	1 time	More than 7 ounces or more than 1 fillet or more than 14 pieces of sushi	No	No	< 30 minutes / day	Light	Week 24	02	Entered	41	Male	06NOV15	109	MF4637	<250 mg/day	No	Yes	>=250 mg/day	No	Yes	Yes	Yes	Yes
		Walking		Shrimp	0X	4X raw almonds	02_002	Visit 5	Yes	23	158	10APR16	1 time	More than 7 ounces or more than 1 fillet or more than 14 pieces of sushi	No	No	< 30 minutes / day	Light	Week 24	02	Entered	41	Male	06NOV15	109	MF4637	<250 mg/day	No	Yes	>=250 mg/day	No	Yes	Yes	Yes	Yes
		Walking		Shrimp	0X	4X raw almonds	02_002	Visit 5	Yes	23	159	11APR16	1 time	More than 7 ounces or more than 1 fillet or more than 14 pieces of sushi	No	No	< 30 minutes / day	Light	Week 24	02	Entered	41	Male	06NOV15	109	MF4637	<250 mg/day	No	Yes	>=250 mg/day	No	Yes	Yes	Yes	Yes
		Walking		Shrimp	0X	4X raw almonds	02_002	Visit 5	Yes	23	160	12APR16	1 time	More than 7 ounces or more than 1 fillet or more than 14 pieces of sushi	No	No	< 30 minutes / day	Light	Week 24	02	Entered	41	Male	06NOV15	109	MF4637	<250 mg/day	No	Yes	>=250 mg/day	No	Yes	Yes	Yes	Yes
		Walking			3X	0X	02_002	Visit 5	Yes	24	161	13APR16	0 (not at all) (if 0, skip questions 2 and 3)		No	No	< 30 minutes / day	Light	Week 24	02	Entered	41	Male	06NOV15	109	MF4637	<250 mg/day	No	Yes	>=250 mg/day	No	Yes	Yes	Yes	Yes
		Walking			3X	0X	02_002	Visit 5	Yes	24	162	14APR16	0 (not at all) (if 0, skip questions 2 and 3)		No	No	< 30 minutes / day	Light	Week 24	02	Entered	41	Male	06NOV15	109	MF4637	<250 mg/day	No	Yes	>=250 mg/day	No	Yes	Yes	Yes	Yes
		Walking			3X	0X	02_002	Visit 5	Yes	24	163	15APR16	0 (not at all) (if 0, skip questions 2 and 3)		No	No	< 30 minutes / day	Light	Week 24	02	Entered	41	Male	06NOV15	109	MF4637	<250 mg/day	No	Yes	>=250 mg/day	No	Yes	Yes	Yes	Yes
		Walking			3X	0X	02_002	Visit 5	Yes	24	164	16APR16	0 (not at all) (if 0, skip questions 2 and 3)		No	No	< 30 minutes / day	Light	Week 24	02	Entered	41	Male	06NOV15	109	MF4637	<250 mg/day	No	Yes	>=250 mg/day	No	Yes	Yes	Yes	Yes
		Walking			3X	0X	02_002	Visit 5	Yes	24	165	17APR16	0 (not at all) (if 0, skip questions 2 and 3)		No	No	< 30 minutes / day	Light	Week 24	02	Entered	41	Male	06NOV15	109	MF4637	<250 mg/day	No	Yes	>=250 mg/day	No	Yes	Yes	Yes	Yes
		Walking			3X	0X	02_002	Visit 5	Yes	24	166	18APR16	0 (not at all) (if 0, skip questions 2 and 3)		No	No	< 30 minutes / day	Light	Week 24	02	Entered	41	Male	06NOV15	109	MF4637	<250 mg/day	No	Yes	>=250 mg/day	No	Yes	Yes	Yes	Yes
		Walking			3X	0X	02_002	Visit 5	Yes	24	167	19APR16	0 (not at all) (if 0, skip questions 2 and 3)		No	No	< 30 minutes / day	Light	Week 24	02	Entered	41	Male	06NOV15	109	MF4637	<250 mg/day	No	Yes	>=250 mg/day	No	Yes	Yes	Yes	Yes
		walking			1 mexican	none	02_003	Visit 3	Yes	1	0	01NOV15	0 (not at all) (if 0, skip questions 2 and 3)		No	No	< 30 minutes / day	Light	Week 6	02	Entered	58	Male	03NOV15	110	Placebo	>=250 mg/day	Yes	Yes	<250 mg/day	No	Yes	Yes	Yes	Yes
		walking			1 mexican	none	02_003	Visit 3	Yes	1	1	02NOV15	0 (not at all) (if 0, skip questions 2 and 3)		No	No	< 30 minutes / day	Light	Week 6	02	Entered	58	Male	03NOV15	110	Placebo	>=250 mg/day	Yes	Yes	<250 mg/day	No	Yes	Yes	Yes	Yes
		walking			1 mexican	none	02_003	Visit 3	Yes	1	2	03NOV15	0 (not at all) (if 0, skip questions 2 and 3)		No	No	< 30 minutes / day	Light	Week 6	02	Entered	58	Male	03NOV15	110	Placebo	>=250 mg/day	Yes	Yes	<250 mg/day	No	Yes	Yes	Yes	Yes
		walking			1 mexican	none	02_003	Visit 3	Yes	1	3	04NOV15	0 (not at all) (if 0, skip questions 2 and 3)		No	No	< 30 minutes / day	Light	Week 6	02	Entered	58	Male	03NOV15	110	Placebo	>=250 mg/day	Yes	Yes	<250 mg/day	No	Yes	Yes	Yes	Yes
		walking			1 mexican	none	02_003	Visit 3	Yes	1	4	05NOV15	0 (not at all) (if 0, skip questions 2 and 3)		No	No	< 30 minutes / day	Light	Week 6	02	Entered	58	Male	03NOV15	110	Placebo	>=250 mg/day	Yes	Yes	<250 mg/day	No	Yes	Yes	Yes	Yes
		walking			1 mexican	none	02_003	Visit 3	Yes	1	5	06NOV15	0 (not at all) (if 0, skip questions 2 and 3)		No	No	< 30 minutes / day	Light	Week 6	02	Entered	58	Male	03NOV15	110	Placebo	>=250 mg/day	Yes	Yes	<250 mg/day	No	Yes	Yes	Yes	Yes
		walking			1 mexican	none	02_003	Visit 3	Yes	1	6	07NOV15	0 (not at all) (if 0, skip questions 2 and 3)		No	No	< 30 minutes / day	Light	Week 6	02	Entered	58	Male	03NOV15	110	Placebo	>=250 mg/day	Yes	Yes	<250 mg/day	No	Yes	Yes	Yes	Yes
		walking		clam chowder, fillet maybe cod two times	4	1 just about a hand full	02_003	Visit 3	Yes	2	7	09NOV15	More than 2 times	More than 7 ounces or more than 1 fillet or more than 14 pieces of sushi	No	No	< 30 minutes / day	Light	Week 6	02	Entered	58	Male	03NOV15	110	Placebo	>=250 mg/day	Yes	Yes	<250 mg/day	No	Yes	Yes	Yes	Yes
		walking		clam chowder, fillet maybe cod two times	4	1 just about a hand full	02_003	Visit 3	Yes	2	8	10NOV15	More than 2 times	More than 7 ounces or more than 1 fillet or more than 14 pieces of sushi	No	No	< 30 minutes / day	Light	Week 6	02	Entered	58	Male	03NOV15	110	Placebo	>=250 mg/day	Yes	Yes	<250 mg/day	No	Yes	Yes	Yes	Yes
		walking		clam chowder, fillet maybe cod two times	4	1 just about a hand full	02_003	Visit 3	Yes	2	9	11NOV15	More than 2 times	More than 7 ounces or more than 1 fillet or more than 14 pieces of sushi	No	No	< 30 minutes / day	Light	Week 6	02	Entered	58	Male	03NOV15	110	Placebo	>=250 mg/day	Yes	Yes	<250 mg/day	No	Yes	Yes	Yes	Yes
		walking		clam chowder, fillet maybe cod two times	4	1 just about a hand full	02_003	Visit 3	Yes	2	10	12NOV15	More than 2 times	More than 7 ounces or more than 1 fillet or more than 14 pieces of sushi	No	No	< 30 minutes / day	Light	Week 6	02	Entered	58	Male	03NOV15	110	Placebo	>=250 mg/day	Yes	Yes	<250 mg/day	No	Yes	Yes	Yes	Yes
		walking		clam chowder, fillet maybe cod two times	4	1 just about a hand full	02_003	Visit 3	Yes	2	11	13NOV15	More than 2 times	More than 7 ounces or more than 1 fillet or more than 14 pieces of sushi	No	No	< 30 minutes / day	Light	Week 6	02	Entered	58	Male	03NOV15	110	Placebo	>=250 mg/day	Yes	Yes	<250 mg/day	No	Yes	Yes	Yes	Yes
		walking		clam chowder, fillet maybe cod two times	4	1 just about a hand full	02_003	Visit 3	Yes	2	12	14NOV15	More than 2 times	More than 7 ounces or more than 1 fillet or more than 14 pieces of sushi	No	No	< 30 minutes / day	Light	Week 6	02	Entered	58	Male	03NOV15	110	Placebo	>=250 mg/day	Yes	Yes	<250 mg/day	No	Yes	Yes	Yes	Yes
		walking		clam chowder, fillet maybe cod two times	4	1 just about a hand full	02_003	Visit 3	Yes	2	13	15NOV15	More than 2 times	More than 7 ounces or more than 1 fillet or more than 14 pieces of sushi	No	No	< 30 minutes / day	Light	Week 6	02	Entered	58	Male	03NOV15	110	Placebo	>=250 mg/day	Yes	Yes	<250 mg/day	No	Yes	Yes	Yes	Yes
		walking		salmon,sardines	2	0	02_003	Visit 3	Yes	3	14	16NOV15	More than 2 times	2 to 7 ounces or about 1 fillet or 4-14 pieces of sushi	No	No	< 30 minutes / day	Light	Week 6	02	Entered	58	Male	03NOV15	110	Placebo	>=250 mg/day	Yes	Yes	<250 mg/day	No	Yes	Yes	Yes	Yes
		walking		salmon,sardines	2	0	02_003	Visit 3	Yes	3	15	17NOV15	More than 2 times	2 to 7 ounces or about 1 fillet or 4-14 pieces of sushi	No	No	< 30 minutes / day	Light	Week 6	02	Entered	58	Male	03NOV15	110	Placebo	>=250 mg/day	Yes	Yes	<250 mg/day	No	Yes	Yes	Yes	Yes
		walking		salmon,sardines	2	0	02_003	Visit 3	Yes	3	16	18NOV15	More than 2 times	2 to 7 ounces or about 1 fillet or 4-14 pieces of sushi	No	No	< 30 minutes / day	Light	Week 6	02	Entered	58	Male	03NOV15	110	Placebo	>=250 mg/day	Yes	Yes	<250 mg/day	No	Yes	Yes	Yes	Yes
		walking		salmon,sardines	2	0	02_003	Visit 3	Yes	3	17	19NOV15	More than 2 times	2 to 7 ounces or about 1 fillet or 4-14 pieces of sushi	No	No	< 30 minutes / day	Light	Week 6	02	Entered	58	Male	03NOV15	110	Placebo	>=250 mg/day	Yes	Yes	<250 mg/day	No	Yes	Yes	Yes	Yes
		walking		salmon,sardines	2	0	02_003	Visit 3	Yes	3	18	20NOV15	More than 2 times	2 to 7 ounces or about 1 fillet or 4-14 pieces of sushi	No	No	< 30 minutes / day	Light	Week 6	02	Entered	58	Male	03NOV15	110	Placebo	>=250 mg/day	Yes	Yes	<250 mg/day	No	Yes	Yes	Yes	Yes
		walking		salmon,sardines	2	0	02_003	Visit 3	Yes	3	19	21NOV15	More than 2 times	2 to 7 ounces or about 1 fillet or 4-14 pieces of sushi	No	No	< 30 minutes / day	Light	Week 6	02	Entered	58	Male	03NOV15	110	Placebo	>=250 mg/day	Yes	Yes	<250 mg/day	No	Yes	Yes	Yes	Yes
		walking		salmon,sardines	2	0	02_003	Visit 3	Yes	3	20	22NOV15	More than 2 times	2 to 7 ounces or about 1 fillet or 4-14 pieces of sushi	No	No	< 30 minutes / day	Light	Week 6	02	Entered	58	Male	03NOV15	110	Placebo	>=250 mg/day	Yes	Yes	<250 mg/day	No	Yes	Yes	Yes	Yes
		walking and moving and setting up a christmas tree lot		Shrimp,Tuna	none	none	02_003	Visit 3	Yes	4	21	23NOV15	2 times	2 to 7 ounces or about 1 fillet or 4-14 pieces of sushi	No	No	< 30 minutes / day	Moderate	Week 6	02	Entered	58	Male	03NOV15	110	Placebo	>=250 mg/day	Yes	Yes	<250 mg/day	No	Yes	Yes	Yes	Yes
		walking and moving and setting up a christmas tree lot		Shrimp,Tuna	none	none	02_003	Visit 3	Yes	4	22	24NOV15	2 times	2 to 7 ounces or about 1 fillet or 4-14 pieces of sushi	No	No	< 30 minutes / day	Moderate	Week 6	02	Entered	58	Male	03NOV15	110	Placebo	>=250 mg/day	Yes	Yes	<250 mg/day	No	Yes	Yes	Yes	Yes
		walking and moving and setting up a christmas tree lot		Shrimp,Tuna	none	none	02_003	Visit 3	Yes	4	23	25NOV15	2 times	2 to 7 ounces or about 1 fillet or 4-14 pieces of sushi	No	No	< 30 minutes / day	Moderate	Week 6	02	Entered	58	Male	03NOV15	110	Placebo	>=250 mg/day	Yes	Yes	<250 mg/day	No	Yes	Yes	Yes	Yes
		walking and moving and setting up a christmas tree lot		Shrimp,Tuna	none	none	02_003	Visit 3	Yes	4	24	26NOV15	2 times	2 to 7 ounces or about 1 fillet or 4-14 pieces of sushi	No	No	< 30 minutes / day	Moderate	Week 6	02	Entered	58	Male	03NOV15	110	Placebo	>=250 mg/day	Yes	Yes	<250 mg/day	No	Yes	Yes	Yes	Yes
		walking and moving and setting up a christmas tree lot		Shrimp,Tuna	none	none	02_003	Visit 3	Yes	4	25	27NOV15	2 times	2 to 7 ounces or about 1 fillet or 4-14 pieces of sushi	No	No	< 30 minutes / day	Moderate	Week 6	02	Entered	58	Male	03NOV15	110	Placebo	>=250 mg/day	Yes	Yes	<250 mg/day	No	Yes	Yes	Yes	Yes
		walking and moving and setting up a christmas tree lot		Shrimp,Tuna	none	none	02_003	Visit 3	Yes	4	26	28NOV15	2 times	2 to 7 ounces or about 1 fillet or 4-14 pieces of sushi	No	No	< 30 minutes / day	Moderate	Week 6	02	Entered	58	Male	03NOV15	110	Placebo	>=250 mg/day	Yes	Yes	<250 mg/day	No	Yes	Yes	Yes	Yes
		walking and moving and setting up a christmas tree lot		Shrimp,Tuna	none	none	02_003	Visit 3	Yes	4	27	29NOV15	2 times	2 to 7 ounces or about 1 fillet or 4-14 pieces of sushi	No	No	< 30 minutes / day	Moderate	Week 6	02	Entered	58	Male	03NOV15	110	Placebo	>=250 mg/day	Yes	Yes	<250 mg/day	No	Yes	Yes	Yes	Yes
		walking,running		shrimp,tuna,sardines	none	none	02_003	Visit 3	Yes	5	28	30NOV15	More than 2 times	2 to 7 ounces or about 1 fillet or 4-14 pieces of sushi	No	No	< 30 minutes / day	Moderate	Week 6	02	Entered	58	Male	03NOV15	110	Placebo	>=250 mg/day	Yes	Yes	<250 mg/day	No	Yes	Yes	Yes	Yes
		walking,running		shrimp,tuna,sardines	none	none	02_003	Visit 3	Yes	5	29	01DEC15	More than 2 times	2 to 7 ounces or about 1 fillet or 4-14 pieces of sushi	No	No	< 30 minutes / day	Moderate	Week 6	02	Entered	58	Male	03NOV15	110	Placebo	>=250 mg/day	Yes	Yes	<250 mg/day	No	Yes	Yes	Yes	Yes
		walking,running		shrimp,tuna,sardines	none	none	02_003	Visit 3	Yes	5	30	02DEC15	More than 2 times	2 to 7 ounces or about 1 fillet or 4-14 pieces of sushi	No	No	< 30 minutes / day	Moderate	Week 6	02	Entered	58	Male	03NOV15	110	Placebo	>=250 mg/day	Yes	Yes	<250 mg/day	No	Yes	Yes	Yes	Yes
		walking,running		shrimp,tuna,sardines	none	none	02_003	Visit 3	Yes	5	31	03DEC15	More than 2 times	2 to 7 ounces or about 1 fillet or 4-14 pieces of sushi	No	No	< 30 minutes / day	Moderate	Week 6	02	Entered	58	Male	03NOV15	110	Placebo	>=250 mg/day	Yes	Yes	<250 mg/day	No	Yes	Yes	Yes	Yes
		walking,running		shrimp,tuna,sardines	none	none	02_003	Visit 3	Yes	5	32	04DEC15	More than 2 times	2 to 7 ounces or about 1 fillet or 4-14 pieces of sushi	No	No	< 30 minutes / day	Moderate	Week 6	02	Entered	58	Male	03NOV15	110	Placebo	>=250 mg/day	Yes	Yes	<250 mg/day	No	Yes	Yes	Yes	Yes
		walking,running		shrimp,tuna,sardines	none	none	02_003	Visit 3	Yes	5	33	05DEC15	More than 2 times	2 to 7 ounces or about 1 fillet or 4-14 pieces of sushi	No	No	< 30 minutes / day	Moderate	Week 6	02	Entered	58	Male	03NOV15	110	Placebo	>=250 mg/day	Yes	Yes	<250 mg/day	No	Yes	Yes	Yes	Yes
		walking,running		shrimp,tuna,sardines	none	none	02_003	Visit 3	Yes	5	34	06DEC15	More than 2 times	2 to 7 ounces or about 1 fillet or 4-14 pieces of sushi	No	No	< 30 minutes / day	Moderate	Week 6	02	Entered	58	Male	03NOV15	110	Placebo	>=250 mg/day	Yes	Yes	<250 mg/day	No	Yes	Yes	Yes	Yes
		walking,yard work,cutting trees		Tuna, Sardines	two times	none	02_003	Visit 3	Yes	6	35	08DEC15	2 times	2 to 7 ounces or about 1 fillet or 4-14 pieces of sushi	No	No	< 30 minutes / day	Moderate	Week 6	02	Entered	58	Male	03NOV15	110	Placebo	>=250 mg/day	Yes	Yes	<250 mg/day	No	Yes	Yes	Yes	Yes
		walking,yard work,cutting trees		Tuna, Sardines	two times	none	02_003	Visit 3	Yes	6	36	09DEC15	2 times	2 to 7 ounces or about 1 fillet or 4-14 pieces of sushi	No	No	< 30 minutes / day	Moderate	Week 6	02	Entered	58	Male	03NOV15	110	Placebo	>=250 mg/day	Yes	Yes	<250 mg/day	No	Yes	Yes	Yes	Yes
		walking,yard work,cutting trees		Tuna, Sardines	two times	none	02_003	Visit 3	Yes	6	37	10DEC15	2 times	2 to 7 ounces or about 1 fillet or 4-14 pieces of sushi	No	No	< 30 minutes / day	Moderate	Week 6	02	Entered	58	Male	03NOV15	110	Placebo	>=250 mg/day	Yes	Yes	<250 mg/day	No	Yes	Yes	Yes	Yes
		walking,yard work,cutting trees		Tuna, Sardines	two times	none	02_003	Visit 3	Yes	6	38	11DEC15	2 times	2 to 7 ounces or about 1 fillet or 4-14 pieces of sushi	No	No	< 30 minutes / day	Moderate	Week 6	02	Entered	58	Male	03NOV15	110	Placebo	>=250 mg/day	Yes	Yes	<250 mg/day	No	Yes	Yes	Yes	Yes
		walking,yard work,cutting trees		Tuna, Sardines	two times	none	02_003	Visit 3	Yes	6	39	12DEC15	2 times	2 to 7 ounces or about 1 fillet or 4-14 pieces of sushi	No	No	< 30 minutes / day	Moderate	Week 6	02	Entered	58	Male	03NOV15	110	Placebo	>=250 mg/day	Yes	Yes	<250 mg/day	No	Yes	Yes	Yes	Yes
		walking,yard work,cutting trees		Tuna, Sardines	two times	none	02_003	Visit 3	Yes	6	40	13DEC15	2 times	2 to 7 ounces or about 1 fillet or 4-14 pieces of sushi	No	No	< 30 minutes / day	Moderate	Week 6	02	Entered	58	Male	03NOV15	110	Placebo	>=250 mg/day	Yes	Yes	<250 mg/day	No	Yes	Yes	Yes	Yes
		walking,yard work,cutting trees		Tuna, Sardines	two times	none	02_003	Visit 3	Yes	6	41	14DEC15	2 times	2 to 7 ounces or about 1 fillet or 4-14 pieces of sushi	No	No	< 30 minutes / day	Moderate	Week 6	02	Entered	58	Male	03NOV15	110	Placebo	>=250 mg/day	Yes	Yes	<250 mg/day	No	Yes	Yes	Yes	Yes
		walking,cutting trees		flounder,shrimp,tuna,sardines	two	none	02_003	Visit 4	Yes	7	42	16DEC15	More than 2 times	2 to 7 ounces or about 1 fillet or 4-14 pieces of sushi	No	No	< 30 minutes / day	Moderate	Week 12	02	Entered	58	Male	03NOV15	110	Placebo	>=250 mg/day	Yes	Yes	<250 mg/day	No	Yes	Yes	Yes	Yes
		walking,cutting trees		flounder,shrimp,tuna,sardines	two	none	02_003	Visit 4	Yes	7	43	17DEC15	More than 2 times	2 to 7 ounces or about 1 fillet or 4-14 pieces of sushi	No	No	< 30 minutes / day	Moderate	Week 12	02	Entered	58	Male	03NOV15	110	Placebo	>=250 mg/day	Yes	Yes	<250 mg/day	No	Yes	Yes	Yes	Yes
		walking,cutting trees		flounder,shrimp,tuna,sardines	two	none	02_003	Visit 4	Yes	7	44	18DEC15	More than 2 times	2 to 7 ounces or about 1 fillet or 4-14 pieces of sushi	No	No	< 30 minutes / day	Moderate	Week 12	02	Entered	58	Male	03NOV15	110	Placebo	>=250 mg/day	Yes	Yes	<250 mg/day	No	Yes	Yes	Yes	Yes
		walking,cutting trees		flounder,shrimp,tuna,sardines	two	none	02_003	Visit 4	Yes	7	45	19DEC15	More than 2 times	2 to 7 ounces or about 1 fillet or 4-14 pieces of sushi	No	No	< 30 minutes / day	Moderate	Week 12	02	Entered	58	Male	03NOV15	110	Placebo	>=250 mg/day	Yes	Yes	<250 mg/day	No	Yes	Yes	Yes	Yes
		walking,cutting trees		flounder,shrimp,tuna,sardines	two	none	02_003	Visit 4	Yes	7	46	20DEC15	More than 2 times	2 to 7 ounces or about 1 fillet or 4-14 pieces of sushi	No	No	< 30 minutes / day	Moderate	Week 12	02	Entered	58	Male	03NOV15	110	Placebo	>=250 mg/day	Yes	Yes	<250 mg/day	No	Yes	Yes	Yes	Yes
		walking,cutting trees		flounder,shrimp,tuna,sardines	two	none	02_003	Visit 4	Yes	7	47	21DEC15	More than 2 times	2 to 7 ounces or about 1 fillet or 4-14 pieces of sushi	No	No	< 30 minutes / day	Moderate	Week 12	02	Entered	58	Male	03NOV15	110	Placebo	>=250 mg/day	Yes	Yes	<250 mg/day	No	Yes	Yes	Yes	Yes
		walking,cutting trees		flounder,shrimp,tuna,sardines	two	none	02_003	Visit 4	Yes	7	48	22DEC15	More than 2 times	2 to 7 ounces or about 1 fillet or 4-14 pieces of sushi	No	No	< 30 minutes / day	Moderate	Week 12	02	Entered	58	Male	03NOV15	110	Placebo	>=250 mg/day	Yes	Yes	<250 mg/day	No	Yes	Yes	Yes	Yes
		Walking		Salmon	One time	None	02_003	Visit 4	Yes	8	49	22DEC15	2 times	2 to 7 ounces or about 1 fillet or 4-14 pieces of sushi	No	No	< 30 minutes / day	Light	Week 12	02	Entered	58	Male	03NOV15	110	Placebo	>=250 mg/day	Yes	Yes	<250 mg/day	No	Yes	Yes	Yes	Yes
		Walking		Salmon	One time	None	02_003	Visit 4	Yes	8	50	23DEC15	2 times	2 to 7 ounces or about 1 fillet or 4-14 pieces of sushi	No	No	< 30 minutes / day	Light	Week 12	02	Entered	58	Male	03NOV15	110	Placebo	>=250 mg/day	Yes	Yes	<250 mg/day	No	Yes	Yes	Yes	Yes
		Walking		Salmon	One time	None	02_003	Visit 4	Yes	8	51	24DEC15	2 times	2 to 7 ounces or about 1 fillet or 4-14 pieces of sushi	No	No	< 30 minutes / day	Light	Week 12	02	Entered	58	Male	03NOV15	110	Placebo	>=250 mg/day	Yes	Yes	<250 mg/day	No	Yes	Yes	Yes	Yes
		Walking		Salmon	One time	None	02_003	Visit 4	Yes	8	52	25DEC15	2 times	2 to 7 ounces or about 1 fillet or 4-14 pieces of sushi	No	No	< 30 minutes / day	Light	Week 12	02	Entered	58	Male	03NOV15	110	Placebo	>=250 mg/day	Yes	Yes	<250 mg/day	No	Yes	Yes	Yes	Yes
		Walking		Salmon	One time	None	02_003	Visit 4	Yes	8	53	26DEC15	2 times	2 to 7 ounces or about 1 fillet or 4-14 pieces of sushi	No	No	< 30 minutes / day	Light	Week 12	02	Entered	58	Male	03NOV15	110	Placebo	>=250 mg/day	Yes	Yes	<250 mg/day	No	Yes	Yes	Yes	Yes
		Walking		Salmon	One time	None	02_003	Visit 4	Yes	8	54	27DEC15	2 times	2 to 7 ounces or about 1 fillet or 4-14 pieces of sushi	No	No	< 30 minutes / day	Light	Week 12	02	Entered	58	Male	03NOV15	110	Placebo	>=250 mg/day	Yes	Yes	<250 mg/day	No	Yes	Yes	Yes	Yes
		Walking		Salmon	One time	None	02_003	Visit 4	Yes	8	55	28DEC15	2 times	2 to 7 ounces or about 1 fillet or 4-14 pieces of sushi	No	No	< 30 minutes / day	Light	Week 12	02	Entered	58	Male	03NOV15	110	Placebo	>=250 mg/day	Yes	Yes	<250 mg/day	No	Yes	Yes	Yes	Yes
		walking		clams,scallops,tuna	two	none	02_003	Visit 4	Yes	9	56	29DEC15	More than 2 times	2 to 7 ounces or about 1 fillet or 4-14 pieces of sushi	No	No	< 30 minutes / day	Light	Week 12	02	Entered	58	Male	03NOV15	110	Placebo	>=250 mg/day	Yes	Yes	<250 mg/day	No	Yes	Yes	Yes	Yes
		walking		clams,scallops,tuna	two	none	02_003	Visit 4	Yes	9	57	30DEC15	More than 2 times	2 to 7 ounces or about 1 fillet or 4-14 pieces of sushi	No	No	< 30 minutes / day	Light	Week 12	02	Entered	58	Male	03NOV15	110	Placebo	>=250 mg/day	Yes	Yes	<250 mg/day	No	Yes	Yes	Yes	Yes
		walking		clams,scallops,tuna	two	none	02_003	Visit 4	Yes	9	58	31DEC15	More than 2 times	2 to 7 ounces or about 1 fillet or 4-14 pieces of sushi	No	No	< 30 minutes / day	Light	Week 12	02	Entered	58	Male	03NOV15	110	Placebo	>=250 mg/day	Yes	Yes	<250 mg/day	No	Yes	Yes	Yes	Yes
		walking		clams,scallops,tuna	two	none	02_003	Visit 4	Yes	9	59	01JAN16	More than 2 times	2 to 7 ounces or about 1 fillet or 4-14 pieces of sushi	No	No	< 30 minutes / day	Light	Week 12	02	Entered	58	Male	03NOV15	110	Placebo	>=250 mg/day	Yes	Yes	<250 mg/day	No	Yes	Yes	Yes	Yes
		walking		clams,scallops,tuna	two	none	02_003	Visit 4	Yes	9	60	02JAN16	More than 2 times	2 to 7 ounces or about 1 fillet or 4-14 pieces of sushi	No	No	< 30 minutes / day	Light	Week 12	02	Entered	58	Male	03NOV15	110	Placebo	>=250 mg/day	Yes	Yes	<250 mg/day	No	Yes	Yes	Yes	Yes
		walking		clams,scallops,tuna	two	none	02_003	Visit 4	Yes	9	61	03JAN16	More than 2 times	2 to 7 ounces or about 1 fillet or 4-14 pieces of sushi	No	No	< 30 minutes / day	Light	Week 12	02	Entered	58	Male	03NOV15	110	Placebo	>=250 mg/day	Yes	Yes	<250 mg/day	No	Yes	Yes	Yes	Yes
		walking		clams,scallops,tuna	two	none	02_003	Visit 4	Yes	9	62	04JAN16	More than 2 times	2 to 7 ounces or about 1 fillet or 4-14 pieces of sushi	No	No	< 30 minutes / day	Light	Week 12	02	Entered	58	Male	03NOV15	110	Placebo	>=250 mg/day	Yes	Yes	<250 mg/day	No	Yes	Yes	Yes	Yes
		walking,short jog		Flounder,Shrimp	Two times	one time nuts small hand full	02_003	Visit 4	Yes	10	63	05JAN16	2 times	2 to 7 ounces or about 1 fillet or 4-14 pieces of sushi	No	No	< 30 minutes / day	Light	Week 12	02	Entered	58	Male	03NOV15	110	Placebo	>=250 mg/day	Yes	Yes	<250 mg/day	No	Yes	Yes	Yes	Yes
		walking,short jog		Flounder,Shrimp	Two times	one time nuts small hand full	02_003	Visit 4	Yes	10	64	06JAN16	2 times	2 to 7 ounces or about 1 fillet or 4-14 pieces of sushi	No	No	< 30 minutes / day	Light	Week 12	02	Entered	58	Male	03NOV15	110	Placebo	>=250 mg/day	Yes	Yes	<250 mg/day	No	Yes	Yes	Yes	Yes
		walking,short jog		Flounder,Shrimp	Two times	one time nuts small hand full	02_003	Visit 4	Yes	10	65	07JAN16	2 times	2 to 7 ounces or about 1 fillet or 4-14 pieces of sushi	No	No	< 30 minutes / day	Light	Week 12	02	Entered	58	Male	03NOV15	110	Placebo	>=250 mg/day	Yes	Yes	<250 mg/day	No	Yes	Yes	Yes	Yes
		walking,short jog		Flounder,Shrimp	Two times	one time nuts small hand full	02_003	Visit 4	Yes	10	66	08JAN16	2 times	2 to 7 ounces or about 1 fillet or 4-14 pieces of sushi	No	No	< 30 minutes / day	Light	Week 12	02	Entered	58	Male	03NOV15	110	Placebo	>=250 mg/day	Yes	Yes	<250 mg/day	No	Yes	Yes	Yes	Yes
		walking,short jog		Flounder,Shrimp	Two times	one time nuts small hand full	02_003	Visit 4	Yes	10	67	09JAN16	2 times	2 to 7 ounces or about 1 fillet or 4-14 pieces of sushi	No	No	< 30 minutes / day	Light	Week 12	02	Entered	58	Male	03NOV15	110	Placebo	>=250 mg/day	Yes	Yes	<250 mg/day	No	Yes	Yes	Yes	Yes
		walking,short jog		Flounder,Shrimp	Two times	one time nuts small hand full	02_003	Visit 4	Yes	10	68	10JAN16	2 times	2 to 7 ounces or about 1 fillet or 4-14 pieces of sushi	No	No	< 30 minutes / day	Light	Week 12	02	Entered	58	Male	03NOV15	110	Placebo	>=250 mg/day	Yes	Yes	<250 mg/day	No	Yes	Yes	Yes	Yes
		walking,short jog		Flounder,Shrimp	Two times	one time nuts small hand full	02_003	Visit 4	Yes	10	69	11JAN16	2 times	2 to 7 ounces or about 1 fillet or 4-14 pieces of sushi	No	No	< 30 minutes / day	Light	Week 12	02	Entered	58	Male	03NOV15	110	Placebo	>=250 mg/day	Yes	Yes	<250 mg/day	No	Yes	Yes	Yes	Yes
		walking		Sardines,Tuna,Oysters	one time	one time potato chips	02_003	Visit 4	Yes	11	70	12JAN16	More than 2 times	2 to 7 ounces or about 1 fillet or 4-14 pieces of sushi	No	No	< 30 minutes / day	Light	Week 12	02	Entered	58	Male	03NOV15	110	Placebo	>=250 mg/day	Yes	Yes	<250 mg/day	No	Yes	Yes	Yes	Yes
		walking		Sardines,Tuna,Oysters	one time	one time potato chips	02_003	Visit 4	Yes	11	71	13JAN16	More than 2 times	2 to 7 ounces or about 1 fillet or 4-14 pieces of sushi	No	No	< 30 minutes / day	Light	Week 12	02	Entered	58	Male	03NOV15	110	Placebo	>=250 mg/day	Yes	Yes	<250 mg/day	No	Yes	Yes	Yes	Yes
		walking		Sardines,Tuna,Oysters	one time	one time potato chips	02_003	Visit 4	Yes	11	72	14JAN16	More than 2 times	2 to 7 ounces or about 1 fillet or 4-14 pieces of sushi	No	No	< 30 minutes / day	Light	Week 12	02	Entered	58	Male	03NOV15	110	Placebo	>=250 mg/day	Yes	Yes	<250 mg/day	No	Yes	Yes	Yes	Yes
		walking		Sardines,Tuna,Oysters	one time	one time potato chips	02_003	Visit 4	Yes	11	73	15JAN16	More than 2 times	2 to 7 ounces or about 1 fillet or 4-14 pieces of sushi	No	No	< 30 minutes / day	Light	Week 12	02	Entered	58	Male	03NOV15	110	Placebo	>=250 mg/day	Yes	Yes	<250 mg/day	No	Yes	Yes	Yes	Yes
		walking		Sardines,Tuna,Oysters	one time	one time potato chips	02_003	Visit 4	Yes	11	74	16JAN16	More than 2 times	2 to 7 ounces or about 1 fillet or 4-14 pieces of sushi	No	No	< 30 minutes / day	Light	Week 12	02	Entered	58	Male	03NOV15	110	Placebo	>=250 mg/day	Yes	Yes	<250 mg/day	No	Yes	Yes	Yes	Yes
		walking		Sardines,Tuna,Oysters	one time	one time potato chips	02_003	Visit 4	Yes	11	75	17JAN16	More than 2 times	2 to 7 ounces or about 1 fillet or 4-14 pieces of sushi	No	No	< 30 minutes / day	Light	Week 12	02	Entered	58	Male	03NOV15	110	Placebo	>=250 mg/day	Yes	Yes	<250 mg/day	No	Yes	Yes	Yes	Yes
		walking		Sardines,Tuna,Oysters	one time	one time potato chips	02_003	Visit 4	Yes	11	76	18JAN16	More than 2 times	2 to 7 ounces or about 1 fillet or 4-14 pieces of sushi	No	No	< 30 minutes / day	Light	Week 12	02	Entered	58	Male	03NOV15	110	Placebo	>=250 mg/day	Yes	Yes	<250 mg/day	No	Yes	Yes	Yes	Yes
		Walking and Jogging		Shrimp two times and sardines one time	none	potato chips and nuts one time	02_003	Visit 4	Yes	12	77	19JAN16	More than 2 times	2 to 7 ounces or about 1 fillet or 4-14 pieces of sushi	No	No	< 30 minutes / day	Light	Week 12	02	Entered	58	Male	03NOV15	110	Placebo	>=250 mg/day	Yes	Yes	<250 mg/day	No	Yes	Yes	Yes	Yes
		Walking and Jogging		Shrimp two times and sardines one time	none	potato chips and nuts one time	02_003	Visit 4	Yes	12	78	20JAN16	More than 2 times	2 to 7 ounces or about 1 fillet or 4-14 pieces of sushi	No	No	< 30 minutes / day	Light	Week 12	02	Entered	58	Male	03NOV15	110	Placebo	>=250 mg/day	Yes	Yes	<250 mg/day	No	Yes	Yes	Yes	Yes
		Walking and Jogging		Shrimp two times and sardines one time	none	potato chips and nuts one time	02_003	Visit 4	Yes	12	79	21JAN16	More than 2 times	2 to 7 ounces or about 1 fillet or 4-14 pieces of sushi	No	No	< 30 minutes / day	Light	Week 12	02	Entered	58	Male	03NOV15	110	Placebo	>=250 mg/day	Yes	Yes	<250 mg/day	No	Yes	Yes	Yes	Yes
		Walking and Jogging		Shrimp two times and sardines one time	none	potato chips and nuts one time	02_003	Visit 4	Yes	12	80	22JAN16	More than 2 times	2 to 7 ounces or about 1 fillet or 4-14 pieces of sushi	No	No	< 30 minutes / day	Light	Week 12	02	Entered	58	Male	03NOV15	110	Placebo	>=250 mg/day	Yes	Yes	<250 mg/day	No	Yes	Yes	Yes	Yes
		Walking and Jogging		Shrimp two times and sardines one time	none	potato chips and nuts one time	02_003	Visit 4	Yes	12	81	23JAN16	More than 2 times	2 to 7 ounces or about 1 fillet or 4-14 pieces of sushi	No	No	< 30 minutes / day	Light	Week 12	02	Entered	58	Male	03NOV15	110	Placebo	>=250 mg/day	Yes	Yes	<250 mg/day	No	Yes	Yes	Yes	Yes
		Walking and Jogging		Shrimp two times and sardines one time	none	potato chips and nuts one time	02_003	Visit 4	Yes	12	82	24JAN16	More than 2 times	2 to 7 ounces or about 1 fillet or 4-14 pieces of sushi	No	No	< 30 minutes / day	Light	Week 12	02	Entered	58	Male	03NOV15	110	Placebo	>=250 mg/day	Yes	Yes	<250 mg/day	No	Yes	Yes	Yes	Yes
		Walking and Jogging		Shrimp two times and sardines one time	none	potato chips and nuts one time	02_003	Visit 4	Yes	12	83	25JAN16	More than 2 times	2 to 7 ounces or about 1 fillet or 4-14 pieces of sushi	No	No	< 30 minutes / day	Light	Week 12	02	Entered	58	Male	03NOV15	110	Placebo	>=250 mg/day	Yes	Yes	<250 mg/day	No	Yes	Yes	Yes	Yes
		walking		salmon	2	1	02_003	Visit 5	Yes	13	84	26JAN16	More than 2 times	2 to 7 ounces or about 1 fillet or 4-14 pieces of sushi	No	No	< 30 minutes / day	Light	Week 24	02	Entered	58	Male	03NOV15	110	Placebo	>=250 mg/day	Yes	Yes	<250 mg/day	No	Yes	Yes	Yes	Yes
		walking		salmon	2	1	02_003	Visit 5	Yes	13	85	27JAN16	More than 2 times	2 to 7 ounces or about 1 fillet or 4-14 pieces of sushi	No	No	< 30 minutes / day	Light	Week 24	02	Entered	58	Male	03NOV15	110	Placebo	>=250 mg/day	Yes	Yes	<250 mg/day	No	Yes	Yes	Yes	Yes
		walking		salmon	2	1	02_003	Visit 5	Yes	13	86	28JAN16	More than 2 times	2 to 7 ounces or about 1 fillet or 4-14 pieces of sushi	No	No	< 30 minutes / day	Light	Week 24	02	Entered	58	Male	03NOV15	110	Placebo	>=250 mg/day	Yes	Yes	<250 mg/day	No	Yes	Yes	Yes	Yes
		walking		salmon	2	1	02_003	Visit 5	Yes	13	87	29JAN16	More than 2 times	2 to 7 ounces or about 1 fillet or 4-14 pieces of sushi	No	No	< 30 minutes / day	Light	Week 24	02	Entered	58	Male	03NOV15	110	Placebo	>=250 mg/day	Yes	Yes	<250 mg/day	No	Yes	Yes	Yes	Yes
		walking		salmon	2	1	02_003	Visit 5	Yes	13	88	30JAN16	More than 2 times	2 to 7 ounces or about 1 fillet or 4-14 pieces of sushi	No	No	< 30 minutes / day	Light	Week 24	02	Entered	58	Male	03NOV15	110	Placebo	>=250 mg/day	Yes	Yes	<250 mg/day	No	Yes	Yes	Yes	Yes
		walking		salmon	2	1	02_003	Visit 5	Yes	13	89	31JAN16	More than 2 times	2 to 7 ounces or about 1 fillet or 4-14 pieces of sushi	No	No	< 30 minutes / day	Light	Week 24	02	Entered	58	Male	03NOV15	110	Placebo	>=250 mg/day	Yes	Yes	<250 mg/day	No	Yes	Yes	Yes	Yes
		walking		salmon	2	1	02_003	Visit 5	Yes	13	90	01FEB16	More than 2 times	2 to 7 ounces or about 1 fillet or 4-14 pieces of sushi	No	No	< 30 minutes / day	Light	Week 24	02	Entered	58	Male	03NOV15	110	Placebo	>=250 mg/day	Yes	Yes	<250 mg/day	No	Yes	Yes	Yes	Yes
		walking		tuna	1	1	02_003	Visit 5	Yes	14	91	02FEB16	1 time	Less than 2 ounces or less than one fillet or less than 4 pieces of sushi	No	No	< 30 minutes / day	Light	Week 24	02	Entered	58	Male	03NOV15	110	Placebo	>=250 mg/day	Yes	Yes	<250 mg/day	No	Yes	Yes	Yes	Yes
		walking		tuna	1	1	02_003	Visit 5	Yes	14	92	03FEB16	1 time	Less than 2 ounces or less than one fillet or less than 4 pieces of sushi	No	No	< 30 minutes / day	Light	Week 24	02	Entered	58	Male	03NOV15	110	Placebo	>=250 mg/day	Yes	Yes	<250 mg/day	No	Yes	Yes	Yes	Yes
		walking		tuna	1	1	02_003	Visit 5	Yes	14	93	04FEB16	1 time	Less than 2 ounces or less than one fillet or less than 4 pieces of sushi	No	No	< 30 minutes / day	Light	Week 24	02	Entered	58	Male	03NOV15	110	Placebo	>=250 mg/day	Yes	Yes	<250 mg/day	No	Yes	Yes	Yes	Yes
		walking		tuna	1	1	02_003	Visit 5	Yes	14	94	05FEB16	1 time	Less than 2 ounces or less than one fillet or less than 4 pieces of sushi	No	No	< 30 minutes / day	Light	Week 24	02	Entered	58	Male	03NOV15	110	Placebo	>=250 mg/day	Yes	Yes	<250 mg/day	No	Yes	Yes	Yes	Yes
		walking		tuna	1	1	02_003	Visit 5	Yes	14	95	06FEB16	1 time	Less than 2 ounces or less than one fillet or less than 4 pieces of sushi	No	No	< 30 minutes / day	Light	Week 24	02	Entered	58	Male	03NOV15	110	Placebo	>=250 mg/day	Yes	Yes	<250 mg/day	No	Yes	Yes	Yes	Yes
		walking		tuna	1	1	02_003	Visit 5	Yes	14	96	07FEB16	1 time	Less than 2 ounces or less than one fillet or less than 4 pieces of sushi	No	No	< 30 minutes / day	Light	Week 24	02	Entered	58	Male	03NOV15	110	Placebo	>=250 mg/day	Yes	Yes	<250 mg/day	No	Yes	Yes	Yes	Yes
		walking		tuna	1	1	02_003	Visit 5	Yes	14	97	08FEB16	1 time	Less than 2 ounces or less than one fillet or less than 4 pieces of sushi	No	No	< 30 minutes / day	Light	Week 24	02	Entered	58	Male	03NOV15	110	Placebo	>=250 mg/day	Yes	Yes	<250 mg/day	No	Yes	Yes	Yes	Yes
		walking		salmon	1	2	02_003	Visit 5	Yes	15	98	09FEB16	1 time	2 to 7 ounces or about 1 fillet or 4-14 pieces of sushi	No	No	< 30 minutes / day	Light	Week 24	02	Entered	58	Male	03NOV15	110	Placebo	>=250 mg/day	Yes	Yes	<250 mg/day	No	Yes	Yes	Yes	Yes
		walking		salmon	1	2	02_003	Visit 5	Yes	15	99	10FEB16	1 time	2 to 7 ounces or about 1 fillet or 4-14 pieces of sushi	No	No	< 30 minutes / day	Light	Week 24	02	Entered	58	Male	03NOV15	110	Placebo	>=250 mg/day	Yes	Yes	<250 mg/day	No	Yes	Yes	Yes	Yes
		walking		salmon	1	2	02_003	Visit 5	Yes	15	100	11FEB16	1 time	2 to 7 ounces or about 1 fillet or 4-14 pieces of sushi	No	No	< 30 minutes / day	Light	Week 24	02	Entered	58	Male	03NOV15	110	Placebo	>=250 mg/day	Yes	Yes	<250 mg/day	No	Yes	Yes	Yes	Yes
		walking		salmon	1	2	02_003	Visit 5	Yes	15	101	12FEB16	1 time	2 to 7 ounces or about 1 fillet or 4-14 pieces of sushi	No	No	< 30 minutes / day	Light	Week 24	02	Entered	58	Male	03NOV15	110	Placebo	>=250 mg/day	Yes	Yes	<250 mg/day	No	Yes	Yes	Yes	Yes
		walking		salmon	1	2	02_003	Visit 5	Yes	15	102	13FEB16	1 time	2 to 7 ounces or about 1 fillet or 4-14 pieces of sushi	No	No	< 30 minutes / day	Light	Week 24	02	Entered	58	Male	03NOV15	110	Placebo	>=250 mg/day	Yes	Yes	<250 mg/day	No	Yes	Yes	Yes	Yes
		walking		salmon	1	2	02_003	Visit 5	Yes	15	103	14FEB16	1 time	2 to 7 ounces or about 1 fillet or 4-14 pieces of sushi	No	No	< 30 minutes / day	Light	Week 24	02	Entered	58	Male	03NOV15	110	Placebo	>=250 mg/day	Yes	Yes	<250 mg/day	No	Yes	Yes	Yes	Yes
		walking		salmon	1	2	02_003	Visit 5	Yes	15	104	15FEB16	1 time	2 to 7 ounces or about 1 fillet or 4-14 pieces of sushi	No	No	< 30 minutes / day	Light	Week 24	02	Entered	58	Male	03NOV15	110	Placebo	>=250 mg/day	Yes	Yes	<250 mg/day	No	Yes	Yes	Yes	Yes
		walking			1	0	02_003	Visit 5	Yes	16	105	14FEB16	0 (not at all) (if 0, skip questions 2 and 3)		No	No	< 30 minutes / day	Light	Week 24	02	Entered	58	Male	03NOV15	110	Placebo	>=250 mg/day	Yes	Yes	<250 mg/day	No	Yes	Yes	Yes	Yes
		walking			1	0	02_003	Visit 5	Yes	16	106	15FEB16	0 (not at all) (if 0, skip questions 2 and 3)		No	No	< 30 minutes / day	Light	Week 24	02	Entered	58	Male	03NOV15	110	Placebo	>=250 mg/day	Yes	Yes	<250 mg/day	No	Yes	Yes	Yes	Yes
		walking			1	0	02_003	Visit 5	Yes	16	107	16FEB16	0 (not at all) (if 0, skip questions 2 and 3)		No	No	< 30 minutes / day	Light	Week 24	02	Entered	58	Male	03NOV15	110	Placebo	>=250 mg/day	Yes	Yes	<250 mg/day	No	Yes	Yes	Yes	Yes
		walking			1	0	02_003	Visit 5	Yes	16	108	17FEB16	0 (not at all) (if 0, skip questions 2 and 3)		No	No	< 30 minutes / day	Light	Week 24	02	Entered	58	Male	03NOV15	110	Placebo	>=250 mg/day	Yes	Yes	<250 mg/day	No	Yes	Yes	Yes	Yes
		walking			1	0	02_003	Visit 5	Yes	16	109	18FEB16	0 (not at all) (if 0, skip questions 2 and 3)		No	No	< 30 minutes / day	Light	Week 24	02	Entered	58	Male	03NOV15	110	Placebo	>=250 mg/day	Yes	Yes	<250 mg/day	No	Yes	Yes	Yes	Yes
		walking			1	0	02_003	Visit 5	Yes	16	110	19FEB16	0 (not at all) (if 0, skip questions 2 and 3)		No	No	< 30 minutes / day	Light	Week 24	02	Entered	58	Male	03NOV15	110	Placebo	>=250 mg/day	Yes	Yes	<250 mg/day	No	Yes	Yes	Yes	Yes
		walking			1	0	02_003	Visit 5	Yes	16	111	20FEB16	0 (not at all) (if 0, skip questions 2 and 3)		No	No	< 30 minutes / day	Light	Week 24	02	Entered	58	Male	03NOV15	110	Placebo	>=250 mg/day	Yes	Yes	<250 mg/day	No	Yes	Yes	Yes	Yes
		walking			1	0	02_003	Visit 5	Yes	17	112	21FEB16	0 (not at all) (if 0, skip questions 2 and 3)		No	No	< 30 minutes / day	Light	Week 24	02	Entered	58	Male	03NOV15	110	Placebo	>=250 mg/day	Yes	Yes	<250 mg/day	No	Yes	Yes	Yes	Yes
		walking			1	0	02_003	Visit 5	Yes	17	113	22FEB16	0 (not at all) (if 0, skip questions 2 and 3)		No	No	< 30 minutes / day	Light	Week 24	02	Entered	58	Male	03NOV15	110	Placebo	>=250 mg/day	Yes	Yes	<250 mg/day	No	Yes	Yes	Yes	Yes
		walking			1	0	02_003	Visit 5	Yes	17	114	23FEB16	0 (not at all) (if 0, skip questions 2 and 3)		No	No	< 30 minutes / day	Light	Week 24	02	Entered	58	Male	03NOV15	110	Placebo	>=250 mg/day	Yes	Yes	<250 mg/day	No	Yes	Yes	Yes	Yes
		walking			1	0	02_003	Visit 5	Yes	17	115	24FEB16	0 (not at all) (if 0, skip questions 2 and 3)		No	No	< 30 minutes / day	Light	Week 24	02	Entered	58	Male	03NOV15	110	Placebo	>=250 mg/day	Yes	Yes	<250 mg/day	No	Yes	Yes	Yes	Yes
		walking			1	0	02_003	Visit 5	Yes	17	116	25FEB16	0 (not at all) (if 0, skip questions 2 and 3)		No	No	< 30 minutes / day	Light	Week 24	02	Entered	58	Male	03NOV15	110	Placebo	>=250 mg/day	Yes	Yes	<250 mg/day	No	Yes	Yes	Yes	Yes
		walking			1	0	02_003	Visit 5	Yes	17	117	26FEB16	0 (not at all) (if 0, skip questions 2 and 3)		No	No	< 30 minutes / day	Light	Week 24	02	Entered	58	Male	03NOV15	110	Placebo	>=250 mg/day	Yes	Yes	<250 mg/day	No	Yes	Yes	Yes	Yes
		walking			1	0	02_003	Visit 5	Yes	17	118	27FEB16	0 (not at all) (if 0, skip questions 2 and 3)		No	No	< 30 minutes / day	Light	Week 24	02	Entered	58	Male	03NOV15	110	Placebo	>=250 mg/day	Yes	Yes	<250 mg/day	No	Yes	Yes	Yes	Yes
		Walking		Tuna	1	0	02_003	Visit 5	Yes	18	119	28FEB16	1 time	Less than 2 ounces or less than one fillet or less than 4 pieces of sushi	No	No	< 30 minutes / day	Moderate	Week 24	02	Entered	58	Male	03NOV15	110	Placebo	>=250 mg/day	Yes	Yes	<250 mg/day	No	Yes	Yes	Yes	Yes
		Walking		Tuna	1	0	02_003	Visit 5	Yes	18	120	29FEB16	1 time	Less than 2 ounces or less than one fillet or less than 4 pieces of sushi	No	No	< 30 minutes / day	Moderate	Week 24	02	Entered	58	Male	03NOV15	110	Placebo	>=250 mg/day	Yes	Yes	<250 mg/day	No	Yes	Yes	Yes	Yes
		Walking		Tuna	1	0	02_003	Visit 5	Yes	18	121	01MAR16	1 time	Less than 2 ounces or less than one fillet or less than 4 pieces of sushi	No	No	< 30 minutes / day	Moderate	Week 24	02	Entered	58	Male	03NOV15	110	Placebo	>=250 mg/day	Yes	Yes	<250 mg/day	No	Yes	Yes	Yes	Yes
		Walking		Tuna	1	0	02_003	Visit 5	Yes	18	122	02MAR16	1 time	Less than 2 ounces or less than one fillet or less than 4 pieces of sushi	No	No	< 30 minutes / day	Moderate	Week 24	02	Entered	58	Male	03NOV15	110	Placebo	>=250 mg/day	Yes	Yes	<250 mg/day	No	Yes	Yes	Yes	Yes
		Walking		Tuna	1	0	02_003	Visit 5	Yes	18	123	03MAR16	1 time	Less than 2 ounces or less than one fillet or less than 4 pieces of sushi	No	No	< 30 minutes / day	Moderate	Week 24	02	Entered	58	Male	03NOV15	110	Placebo	>=250 mg/day	Yes	Yes	<250 mg/day	No	Yes	Yes	Yes	Yes
		Walking		Tuna	1	0	02_003	Visit 5	Yes	18	124	04MAR16	1 time	Less than 2 ounces or less than one fillet or less than 4 pieces of sushi	No	No	< 30 minutes / day	Moderate	Week 24	02	Entered	58	Male	03NOV15	110	Placebo	>=250 mg/day	Yes	Yes	<250 mg/day	No	Yes	Yes	Yes	Yes
		Walking		Tuna	1	0	02_003	Visit 5	Yes	18	125	05MAR16	1 time	Less than 2 ounces or less than one fillet or less than 4 pieces of sushi	No	No	< 30 minutes / day	Moderate	Week 24	02	Entered	58	Male	03NOV15	110	Placebo	>=250 mg/day	Yes	Yes	<250 mg/day	No	Yes	Yes	Yes	Yes
		walking			0	1	02_003	Visit 5	Yes	19	126	06MAR16	0 (not at all) (if 0, skip questions 2 and 3)		No	No	< 30 minutes / day	Moderate	Week 24	02	Entered	58	Male	03NOV15	110	Placebo	>=250 mg/day	Yes	Yes	<250 mg/day	No	Yes	Yes	Yes	Yes
		walking			0	1	02_003	Visit 5	Yes	19	127	07MAR16	0 (not at all) (if 0, skip questions 2 and 3)		No	No	< 30 minutes / day	Moderate	Week 24	02	Entered	58	Male	03NOV15	110	Placebo	>=250 mg/day	Yes	Yes	<250 mg/day	No	Yes	Yes	Yes	Yes
		walking			0	1	02_003	Visit 5	Yes	19	128	08MAR16	0 (not at all) (if 0, skip questions 2 and 3)		No	No	< 30 minutes / day	Moderate	Week 24	02	Entered	58	Male	03NOV15	110	Placebo	>=250 mg/day	Yes	Yes	<250 mg/day	No	Yes	Yes	Yes	Yes
		walking			0	1	02_003	Visit 5	Yes	19	129	09MAR16	0 (not at all) (if 0, skip questions 2 and 3)		No	No	< 30 minutes / day	Moderate	Week 24	02	Entered	58	Male	03NOV15	110	Placebo	>=250 mg/day	Yes	Yes	<250 mg/day	No	Yes	Yes	Yes	Yes
		walking			0	1	02_003	Visit 5	Yes	19	130	10MAR16	0 (not at all) (if 0, skip questions 2 and 3)		No	No	< 30 minutes / day	Moderate	Week 24	02	Entered	58	Male	03NOV15	110	Placebo	>=250 mg/day	Yes	Yes	<250 mg/day	No	Yes	Yes	Yes	Yes
		walking			0	1	02_003	Visit 5	Yes	19	131	11MAR16	0 (not at all) (if 0, skip questions 2 and 3)		No	No	< 30 minutes / day	Moderate	Week 24	02	Entered	58	Male	03NOV15	110	Placebo	>=250 mg/day	Yes	Yes	<250 mg/day	No	Yes	Yes	Yes	Yes
		walking			0	1	02_003	Visit 5	Yes	19	132	12MAR16	0 (not at all) (if 0, skip questions 2 and 3)		No	No	< 30 minutes / day	Moderate	Week 24	02	Entered	58	Male	03NOV15	110	Placebo	>=250 mg/day	Yes	Yes	<250 mg/day	No	Yes	Yes	Yes	Yes
		Walking		Tuna	1	0	02_003	Visit 5	Yes	20	133	13MAR16	1 time	2 to 7 ounces or about 1 fillet or 4-14 pieces of sushi	No	No	< 30 minutes / day	Moderate	Week 24	02	Entered	58	Male	03NOV15	110	Placebo	>=250 mg/day	Yes	Yes	<250 mg/day	No	Yes	Yes	Yes	Yes
		Walking		Tuna	1	0	02_003	Visit 5	Yes	20	134	14MAR16	1 time	2 to 7 ounces or about 1 fillet or 4-14 pieces of sushi	No	No	< 30 minutes / day	Moderate	Week 24	02	Entered	58	Male	03NOV15	110	Placebo	>=250 mg/day	Yes	Yes	<250 mg/day	No	Yes	Yes	Yes	Yes
		Walking		Tuna	1	0	02_003	Visit 5	Yes	20	135	15MAR16	1 time	2 to 7 ounces or about 1 fillet or 4-14 pieces of sushi	No	No	< 30 minutes / day	Moderate	Week 24	02	Entered	58	Male	03NOV15	110	Placebo	>=250 mg/day	Yes	Yes	<250 mg/day	No	Yes	Yes	Yes	Yes
		Walking		Tuna	1	0	02_003	Visit 5	Yes	20	136	16MAR16	1 time	2 to 7 ounces or about 1 fillet or 4-14 pieces of sushi	No	No	< 30 minutes / day	Moderate	Week 24	02	Entered	58	Male	03NOV15	110	Placebo	>=250 mg/day	Yes	Yes	<250 mg/day	No	Yes	Yes	Yes	Yes
		Walking		Tuna	1	0	02_003	Visit 5	Yes	20	137	17MAR16	1 time	2 to 7 ounces or about 1 fillet or 4-14 pieces of sushi	No	No	< 30 minutes / day	Moderate	Week 24	02	Entered	58	Male	03NOV15	110	Placebo	>=250 mg/day	Yes	Yes	<250 mg/day	No	Yes	Yes	Yes	Yes
		Walking		Tuna	1	0	02_003	Visit 5	Yes	20	138	18MAR16	1 time	2 to 7 ounces or about 1 fillet or 4-14 pieces of sushi	No	No	< 30 minutes / day	Moderate	Week 24	02	Entered	58	Male	03NOV15	110	Placebo	>=250 mg/day	Yes	Yes	<250 mg/day	No	Yes	Yes	Yes	Yes
		Walking		Tuna	1	0	02_003	Visit 5	Yes	20	139	19MAR16	1 time	2 to 7 ounces or about 1 fillet or 4-14 pieces of sushi	No	No	< 30 minutes / day	Moderate	Week 24	02	Entered	58	Male	03NOV15	110	Placebo	>=250 mg/day	Yes	Yes	<250 mg/day	No	Yes	Yes	Yes	Yes
		Walking			1	0	02_003	Visit 5	Yes	21	140	20MAR16	0 (not at all) (if 0, skip questions 2 and 3)		No	No	< 30 minutes / day	Moderate	Week 24	02	Entered	58	Male	03NOV15	110	Placebo	>=250 mg/day	Yes	Yes	<250 mg/day	No	Yes	Yes	Yes	Yes
		Walking			1	0	02_003	Visit 5	Yes	21	141	21MAR16	0 (not at all) (if 0, skip questions 2 and 3)		No	No	< 30 minutes / day	Moderate	Week 24	02	Entered	58	Male	03NOV15	110	Placebo	>=250 mg/day	Yes	Yes	<250 mg/day	No	Yes	Yes	Yes	Yes
		Walking			1	0	02_003	Visit 5	Yes	21	142	22MAR16	0 (not at all) (if 0, skip questions 2 and 3)		No	No	< 30 minutes / day	Moderate	Week 24	02	Entered	58	Male	03NOV15	110	Placebo	>=250 mg/day	Yes	Yes	<250 mg/day	No	Yes	Yes	Yes	Yes
		Walking			1	0	02_003	Visit 5	Yes	21	143	23MAR16	0 (not at all) (if 0, skip questions 2 and 3)		No	No	< 30 minutes / day	Moderate	Week 24	02	Entered	58	Male	03NOV15	110	Placebo	>=250 mg/day	Yes	Yes	<250 mg/day	No	Yes	Yes	Yes	Yes
		Walking			1	0	02_003	Visit 5	Yes	21	144	24MAR16	0 (not at all) (if 0, skip questions 2 and 3)		No	No	< 30 minutes / day	Moderate	Week 24	02	Entered	58	Male	03NOV15	110	Placebo	>=250 mg/day	Yes	Yes	<250 mg/day	No	Yes	Yes	Yes	Yes
		Walking			1	0	02_003	Visit 5	Yes	21	145	25MAR16	0 (not at all) (if 0, skip questions 2 and 3)		No	No	< 30 minutes / day	Moderate	Week 24	02	Entered	58	Male	03NOV15	110	Placebo	>=250 mg/day	Yes	Yes	<250 mg/day	No	Yes	Yes	Yes	Yes
		Walking			1	0	02_003	Visit 5	Yes	21	146	26MAR16	0 (not at all) (if 0, skip questions 2 and 3)		No	No	< 30 minutes / day	Moderate	Week 24	02	Entered	58	Male	03NOV15	110	Placebo	>=250 mg/day	Yes	Yes	<250 mg/day	No	Yes	Yes	Yes	Yes
		Walking		Tuna	1	0	02_003	Visit 5	Yes	22	147	27MAR16	1 time	Less than 2 ounces or less than one fillet or less than 4 pieces of sushi	No	No	< 30 minutes / day	Moderate	Week 24	02	Entered	58	Male	03NOV15	110	Placebo	>=250 mg/day	Yes	Yes	<250 mg/day	No	Yes	Yes	Yes	Yes
		Walking		Tuna	1	0	02_003	Visit 5	Yes	22	148	28MAR16	1 time	Less than 2 ounces or less than one fillet or less than 4 pieces of sushi	No	No	< 30 minutes / day	Moderate	Week 24	02	Entered	58	Male	03NOV15	110	Placebo	>=250 mg/day	Yes	Yes	<250 mg/day	No	Yes	Yes	Yes	Yes
		Walking		Tuna	1	0	02_003	Visit 5	Yes	22	149	29MAR16	1 time	Less than 2 ounces or less than one fillet or less than 4 pieces of sushi	No	No	< 30 minutes / day	Moderate	Week 24	02	Entered	58	Male	03NOV15	110	Placebo	>=250 mg/day	Yes	Yes	<250 mg/day	No	Yes	Yes	Yes	Yes
		Walking		Tuna	1	0	02_003	Visit 5	Yes	22	150	30MAR16	1 time	Less than 2 ounces or less than one fillet or less than 4 pieces of sushi	No	No	< 30 minutes / day	Moderate	Week 24	02	Entered	58	Male	03NOV15	110	Placebo	>=250 mg/day	Yes	Yes	<250 mg/day	No	Yes	Yes	Yes	Yes
		Walking		Tuna	1	0	02_003	Visit 5	Yes	22	151	31MAR16	1 time	Less than 2 ounces or less than one fillet or less than 4 pieces of sushi	No	No	< 30 minutes / day	Moderate	Week 24	02	Entered	58	Male	03NOV15	110	Placebo	>=250 mg/day	Yes	Yes	<250 mg/day	No	Yes	Yes	Yes	Yes
		Walking		Tuna	1	0	02_003	Visit 5	Yes	22	152	01APR16	1 time	Less than 2 ounces or less than one fillet or less than 4 pieces of sushi	No	No	< 30 minutes / day	Moderate	Week 24	02	Entered	58	Male	03NOV15	110	Placebo	>=250 mg/day	Yes	Yes	<250 mg/day	No	Yes	Yes	Yes	Yes
		Walking		Tuna	1	0	02_003	Visit 5	Yes	22	153	02APR16	1 time	Less than 2 ounces or less than one fillet or less than 4 pieces of sushi	No	No	< 30 minutes / day	Moderate	Week 24	02	Entered	58	Male	03NOV15	110	Placebo	>=250 mg/day	Yes	Yes	<250 mg/day	No	Yes	Yes	Yes	Yes
		Walking		Tuna, white fish	0	2	02_003	Visit 5	Yes	23	154	03APR16	2 times	2 to 7 ounces or about 1 fillet or 4-14 pieces of sushi	No	No	< 30 minutes / day	Moderate	Week 24	02	Entered	58	Male	03NOV15	110	Placebo	>=250 mg/day	Yes	Yes	<250 mg/day	No	Yes	Yes	Yes	Yes
		Walking		Tuna, white fish	0	2	02_003	Visit 5	Yes	23	155	04APR16	2 times	2 to 7 ounces or about 1 fillet or 4-14 pieces of sushi	No	No	< 30 minutes / day	Moderate	Week 24	02	Entered	58	Male	03NOV15	110	Placebo	>=250 mg/day	Yes	Yes	<250 mg/day	No	Yes	Yes	Yes	Yes
		Walking		Tuna, white fish	0	2	02_003	Visit 5	Yes	23	156	05APR16	2 times	2 to 7 ounces or about 1 fillet or 4-14 pieces of sushi	No	No	< 30 minutes / day	Moderate	Week 24	02	Entered	58	Male	03NOV15	110	Placebo	>=250 mg/day	Yes	Yes	<250 mg/day	No	Yes	Yes	Yes	Yes
		Walking		Tuna, white fish	0	2	02_003	Visit 5	Yes	23	157	06APR16	2 times	2 to 7 ounces or about 1 fillet or 4-14 pieces of sushi	No	No	< 30 minutes / day	Moderate	Week 24	02	Entered	58	Male	03NOV15	110	Placebo	>=250 mg/day	Yes	Yes	<250 mg/day	No	Yes	Yes	Yes	Yes
		Walking		Tuna, white fish	0	2	02_003	Visit 5	Yes	23	158	07APR16	2 times	2 to 7 ounces or about 1 fillet or 4-14 pieces of sushi	No	No	< 30 minutes / day	Moderate	Week 24	02	Entered	58	Male	03NOV15	110	Placebo	>=250 mg/day	Yes	Yes	<250 mg/day	No	Yes	Yes	Yes	Yes
		Walking		Tuna, white fish	0	2	02_003	Visit 5	Yes	23	159	08APR16	2 times	2 to 7 ounces or about 1 fillet or 4-14 pieces of sushi	No	No	< 30 minutes / day	Moderate	Week 24	02	Entered	58	Male	03NOV15	110	Placebo	>=250 mg/day	Yes	Yes	<250 mg/day	No	Yes	Yes	Yes	Yes
		Walking		Tuna, white fish	0	2	02_003	Visit 5	Yes	23	160	09APR16	2 times	2 to 7 ounces or about 1 fillet or 4-14 pieces of sushi	No	No	< 30 minutes / day	Moderate	Week 24	02	Entered	58	Male	03NOV15	110	Placebo	>=250 mg/day	Yes	Yes	<250 mg/day	No	Yes	Yes	Yes	Yes
		Walking			0	0	02_003	Visit 5	Yes	24	161	10APR16	0 (not at all) (if 0, skip questions 2 and 3)		No	No	< 30 minutes / day	Moderate	Week 24	02	Entered	58	Male	03NOV15	110	Placebo	>=250 mg/day	Yes	Yes	<250 mg/day	No	Yes	Yes	Yes	Yes
		Walking			0	0	02_003	Visit 5	Yes	24	162	11APR16	0 (not at all) (if 0, skip questions 2 and 3)		No	No	< 30 minutes / day	Moderate	Week 24	02	Entered	58	Male	03NOV15	110	Placebo	>=250 mg/day	Yes	Yes	<250 mg/day	No	Yes	Yes	Yes	Yes
		Walking			0	0	02_003	Visit 5	Yes	24	163	12APR16	0 (not at all) (if 0, skip questions 2 and 3)		No	No	< 30 minutes / day	Moderate	Week 24	02	Entered	58	Male	03NOV15	110	Placebo	>=250 mg/day	Yes	Yes	<250 mg/day	No	Yes	Yes	Yes	Yes
		Walking			0	0	02_003	Visit 5	Yes	24	164	13APR16	0 (not at all) (if 0, skip questions 2 and 3)		No	No	< 30 minutes / day	Moderate	Week 24	02	Entered	58	Male	03NOV15	110	Placebo	>=250 mg/day	Yes	Yes	<250 mg/day	No	Yes	Yes	Yes	Yes
		Walking			0	0	02_003	Visit 5	Yes	24	165	14APR16	0 (not at all) (if 0, skip questions 2 and 3)		No	No	< 30 minutes / day	Moderate	Week 24	02	Entered	58	Male	03NOV15	110	Placebo	>=250 mg/day	Yes	Yes	<250 mg/day	No	Yes	Yes	Yes	Yes
		Walking			0	0	02_003	Visit 5	Yes	24	166	15APR16	0 (not at all) (if 0, skip questions 2 and 3)		No	No	< 30 minutes / day	Moderate	Week 24	02	Entered	58	Male	03NOV15	110	Placebo	>=250 mg/day	Yes	Yes	<250 mg/day	No	Yes	Yes	Yes	Yes
		Walking			0	0	02_003	Visit 5	Yes	24	167	16APR16	0 (not at all) (if 0, skip questions 2 and 3)		No	No	< 30 minutes / day	Moderate	Week 24	02	Entered	58	Male	03NOV15	110	Placebo	>=250 mg/day	Yes	Yes	<250 mg/day	No	Yes	Yes	Yes	Yes
		walking	I didn't take them at the clinic because I was fasting. I took 3 capsules once I got home and ate.	whitefish and oysters	3	0	02_004	Visit 3	No	1	0	11NOV15	2 times	2 to 7 ounces or about 1 fillet or 4-14 pieces of sushi	No	No	< 30 minutes / day	Light	Week 6	02	Early Termination	60	Female	12NOV15	111	Placebo	<250 mg/day	Yes	Yes	<250 mg/day	No	Yes	Yes	Yes	Yes
		walking		whitefish and oysters	3	0	02_004	Visit 3	Yes	1	1	12NOV15	2 times	2 to 7 ounces or about 1 fillet or 4-14 pieces of sushi	No	No	< 30 minutes / day	Light	Week 6	02	Early Termination	60	Female	12NOV15	111	Placebo	<250 mg/day	Yes	Yes	<250 mg/day	No	Yes	Yes	Yes	Yes
		walking		whitefish and oysters	3	0	02_004	Visit 3	Yes	1	2	13NOV15	2 times	2 to 7 ounces or about 1 fillet or 4-14 pieces of sushi	No	No	< 30 minutes / day	Light	Week 6	02	Early Termination	60	Female	12NOV15	111	Placebo	<250 mg/day	Yes	Yes	<250 mg/day	No	Yes	Yes	Yes	Yes
		walking		whitefish and oysters	3	0	02_004	Visit 3	Yes	1	3	14NOV15	2 times	2 to 7 ounces or about 1 fillet or 4-14 pieces of sushi	No	No	< 30 minutes / day	Light	Week 6	02	Early Termination	60	Female	12NOV15	111	Placebo	<250 mg/day	Yes	Yes	<250 mg/day	No	Yes	Yes	Yes	Yes
		walking		whitefish and oysters	3	0	02_004	Visit 3	Yes	1	4	15NOV15	2 times	2 to 7 ounces or about 1 fillet or 4-14 pieces of sushi	No	No	< 30 minutes / day	Light	Week 6	02	Early Termination	60	Female	12NOV15	111	Placebo	<250 mg/day	Yes	Yes	<250 mg/day	No	Yes	Yes	Yes	Yes
		walking		whitefish and oysters	3	0	02_004	Visit 3	Yes	1	5	16NOV15	2 times	2 to 7 ounces or about 1 fillet or 4-14 pieces of sushi	No	No	< 30 minutes / day	Light	Week 6	02	Early Termination	60	Female	12NOV15	111	Placebo	<250 mg/day	Yes	Yes	<250 mg/day	No	Yes	Yes	Yes	Yes
		walking		whitefish and oysters	3	0	02_004	Visit 3	Yes	1	6	17NOV15	2 times	2 to 7 ounces or about 1 fillet or 4-14 pieces of sushi	No	No	< 30 minutes / day	Light	Week 6	02	Early Termination	60	Female	12NOV15	111	Placebo	<250 mg/day	Yes	Yes	<250 mg/day	No	Yes	Yes	Yes	Yes
eating less junk food		walking		whitefish, oysters	3	2	02_004	Visit 3	Yes	2	7	17NOV15	More than 2 times	2 to 7 ounces or about 1 fillet or 4-14 pieces of sushi	Yes	No	< 30 minutes / day	Moderate	Week 6	02	Early Termination	60	Female	12NOV15	111	Placebo	<250 mg/day	Yes	Yes	<250 mg/day	No	Yes	Yes	Yes	Yes
eating less junk food		walking		whitefish, oysters	3	2	02_004	Visit 3	Yes	2	8	18NOV15	More than 2 times	2 to 7 ounces or about 1 fillet or 4-14 pieces of sushi	Yes	No	< 30 minutes / day	Moderate	Week 6	02	Early Termination	60	Female	12NOV15	111	Placebo	<250 mg/day	Yes	Yes	<250 mg/day	No	Yes	Yes	Yes	Yes
eating less junk food		walking		whitefish, oysters	3	2	02_004	Visit 3	Yes	2	9	19NOV15	More than 2 times	2 to 7 ounces or about 1 fillet or 4-14 pieces of sushi	Yes	No	< 30 minutes / day	Moderate	Week 6	02	Early Termination	60	Female	12NOV15	111	Placebo	<250 mg/day	Yes	Yes	<250 mg/day	No	Yes	Yes	Yes	Yes
eating less junk food		walking		whitefish, oysters	3	2	02_004	Visit 3	Yes	2	10	20NOV15	More than 2 times	2 to 7 ounces or about 1 fillet or 4-14 pieces of sushi	Yes	No	< 30 minutes / day	Moderate	Week 6	02	Early Termination	60	Female	12NOV15	111	Placebo	<250 mg/day	Yes	Yes	<250 mg/day	No	Yes	Yes	Yes	Yes
eating less junk food		walking		whitefish, oysters	3	2	02_004	Visit 3	Yes	2	11	21NOV15	More than 2 times	2 to 7 ounces or about 1 fillet or 4-14 pieces of sushi	Yes	No	< 30 minutes / day	Moderate	Week 6	02	Early Termination	60	Female	12NOV15	111	Placebo	<250 mg/day	Yes	Yes	<250 mg/day	No	Yes	Yes	Yes	Yes
eating less junk food		walking		whitefish, oysters	3	2	02_004	Visit 3	Yes	2	12	22NOV15	More than 2 times	2 to 7 ounces or about 1 fillet or 4-14 pieces of sushi	Yes	No	< 30 minutes / day	Moderate	Week 6	02	Early Termination	60	Female	12NOV15	111	Placebo	<250 mg/day	Yes	Yes	<250 mg/day	No	Yes	Yes	Yes	Yes
eating less junk food		walking		whitefish, oysters	3	2	02_004	Visit 3	Yes	2	13	23NOV15	More than 2 times	2 to 7 ounces or about 1 fillet or 4-14 pieces of sushi	Yes	No	< 30 minutes / day	Moderate	Week 6	02	Early Termination	60	Female	12NOV15	111	Placebo	<250 mg/day	Yes	Yes	<250 mg/day	No	Yes	Yes	Yes	Yes
		walking		whitefish	twuce	none	02_004	Visit 3	Yes	3	14	25NOV15	1 time	2 to 7 ounces or about 1 fillet or 4-14 pieces of sushi	No	No	< 30 minutes / day	Moderate	Week 6	02	Early Termination	60	Female	12NOV15	111	Placebo	<250 mg/day	Yes	Yes	<250 mg/day	No	Yes	Yes	Yes	Yes
		walking		whitefish	twuce	none	02_004	Visit 3	Yes	3	15	26NOV15	1 time	2 to 7 ounces or about 1 fillet or 4-14 pieces of sushi	No	No	< 30 minutes / day	Moderate	Week 6	02	Early Termination	60	Female	12NOV15	111	Placebo	<250 mg/day	Yes	Yes	<250 mg/day	No	Yes	Yes	Yes	Yes
		walking		whitefish	twuce	none	02_004	Visit 3	Yes	3	16	27NOV15	1 time	2 to 7 ounces or about 1 fillet or 4-14 pieces of sushi	No	No	< 30 minutes / day	Moderate	Week 6	02	Early Termination	60	Female	12NOV15	111	Placebo	<250 mg/day	Yes	Yes	<250 mg/day	No	Yes	Yes	Yes	Yes
		walking		whitefish	twuce	none	02_004	Visit 3	Yes	3	17	28NOV15	1 time	2 to 7 ounces or about 1 fillet or 4-14 pieces of sushi	No	No	< 30 minutes / day	Moderate	Week 6	02	Early Termination	60	Female	12NOV15	111	Placebo	<250 mg/day	Yes	Yes	<250 mg/day	No	Yes	Yes	Yes	Yes
		walking		whitefish	twuce	none	02_004	Visit 3	Yes	3	18	29NOV15	1 time	2 to 7 ounces or about 1 fillet or 4-14 pieces of sushi	No	No	< 30 minutes / day	Moderate	Week 6	02	Early Termination	60	Female	12NOV15	111	Placebo	<250 mg/day	Yes	Yes	<250 mg/day	No	Yes	Yes	Yes	Yes
		walking		whitefish	twuce	none	02_004	Visit 3	Yes	3	19	30NOV15	1 time	2 to 7 ounces or about 1 fillet or 4-14 pieces of sushi	No	No	< 30 minutes / day	Moderate	Week 6	02	Early Termination	60	Female	12NOV15	111	Placebo	<250 mg/day	Yes	Yes	<250 mg/day	No	Yes	Yes	Yes	Yes
		walking		whitefish	twuce	none	02_004	Visit 3	Yes	3	20	01DEC15	1 time	2 to 7 ounces or about 1 fillet or 4-14 pieces of sushi	No	No	< 30 minutes / day	Moderate	Week 6	02	Early Termination	60	Female	12NOV15	111	Placebo	<250 mg/day	Yes	Yes	<250 mg/day	No	Yes	Yes	Yes	Yes
		walking		whitefish, oysters	3	0	02_004	Visit 3	Yes	4	21	02DEC15	2 times	2 to 7 ounces or about 1 fillet or 4-14 pieces of sushi	No	No	< 30 minutes / day	Moderate	Week 6	02	Early Termination	60	Female	12NOV15	111	Placebo	<250 mg/day	Yes	Yes	<250 mg/day	No	Yes	Yes	Yes	Yes
		walking		whitefish, oysters	3	0	02_004	Visit 3	Yes	4	22	03DEC15	2 times	2 to 7 ounces or about 1 fillet or 4-14 pieces of sushi	No	No	< 30 minutes / day	Moderate	Week 6	02	Early Termination	60	Female	12NOV15	111	Placebo	<250 mg/day	Yes	Yes	<250 mg/day	No	Yes	Yes	Yes	Yes
		walking		whitefish, oysters	3	0	02_004	Visit 3	Yes	4	23	04DEC15	2 times	2 to 7 ounces or about 1 fillet or 4-14 pieces of sushi	No	No	< 30 minutes / day	Moderate	Week 6	02	Early Termination	60	Female	12NOV15	111	Placebo	<250 mg/day	Yes	Yes	<250 mg/day	No	Yes	Yes	Yes	Yes
		walking		whitefish, oysters	3	0	02_004	Visit 3	Yes	4	24	05DEC15	2 times	2 to 7 ounces or about 1 fillet or 4-14 pieces of sushi	No	No	< 30 minutes / day	Moderate	Week 6	02	Early Termination	60	Female	12NOV15	111	Placebo	<250 mg/day	Yes	Yes	<250 mg/day	No	Yes	Yes	Yes	Yes
		walking		whitefish, oysters	3	0	02_004	Visit 3	Yes	4	25	06DEC15	2 times	2 to 7 ounces or about 1 fillet or 4-14 pieces of sushi	No	No	< 30 minutes / day	Moderate	Week 6	02	Early Termination	60	Female	12NOV15	111	Placebo	<250 mg/day	Yes	Yes	<250 mg/day	No	Yes	Yes	Yes	Yes
		walking		whitefish, oysters	3	0	02_004	Visit 3	Yes	4	26	07DEC15	2 times	2 to 7 ounces or about 1 fillet or 4-14 pieces of sushi	No	No	< 30 minutes / day	Moderate	Week 6	02	Early Termination	60	Female	12NOV15	111	Placebo	<250 mg/day	Yes	Yes	<250 mg/day	No	Yes	Yes	Yes	Yes
		walking		whitefish, oysters	3	0	02_004	Visit 3	Yes	4	27	08DEC15	2 times	2 to 7 ounces or about 1 fillet or 4-14 pieces of sushi	No	No	< 30 minutes / day	Moderate	Week 6	02	Early Termination	60	Female	12NOV15	111	Placebo	<250 mg/day	Yes	Yes	<250 mg/day	No	Yes	Yes	Yes	Yes
trying to limit my soda intake		walking		whitefish, oysters	2	0	02_004	Visit 3	Yes	5	28	09DEC15	2 times	2 to 7 ounces or about 1 fillet or 4-14 pieces of sushi	Yes	No	< 30 minutes / day	Moderate	Week 6	02	Early Termination	60	Female	12NOV15	111	Placebo	<250 mg/day	Yes	Yes	<250 mg/day	No	Yes	Yes	Yes	Yes
trying to limit my soda intake		walking		whitefish, oysters	2	0	02_004	Visit 3	Yes	5	29	10DEC15	2 times	2 to 7 ounces or about 1 fillet or 4-14 pieces of sushi	Yes	No	< 30 minutes / day	Moderate	Week 6	02	Early Termination	60	Female	12NOV15	111	Placebo	<250 mg/day	Yes	Yes	<250 mg/day	No	Yes	Yes	Yes	Yes
trying to limit my soda intake		walking		whitefish, oysters	2	0	02_004	Visit 3	Yes	5	30	11DEC15	2 times	2 to 7 ounces or about 1 fillet or 4-14 pieces of sushi	Yes	No	< 30 minutes / day	Moderate	Week 6	02	Early Termination	60	Female	12NOV15	111	Placebo	<250 mg/day	Yes	Yes	<250 mg/day	No	Yes	Yes	Yes	Yes
trying to limit my soda intake		walking		whitefish, oysters	2	0	02_004	Visit 3	Yes	5	31	12DEC15	2 times	2 to 7 ounces or about 1 fillet or 4-14 pieces of sushi	Yes	No	< 30 minutes / day	Moderate	Week 6	02	Early Termination	60	Female	12NOV15	111	Placebo	<250 mg/day	Yes	Yes	<250 mg/day	No	Yes	Yes	Yes	Yes
trying to limit my soda intake		walking		whitefish, oysters	2	0	02_004	Visit 3	Yes	5	32	13DEC15	2 times	2 to 7 ounces or about 1 fillet or 4-14 pieces of sushi	Yes	No	< 30 minutes / day	Moderate	Week 6	02	Early Termination	60	Female	12NOV15	111	Placebo	<250 mg/day	Yes	Yes	<250 mg/day	No	Yes	Yes	Yes	Yes
trying to limit my soda intake		walking		whitefish, oysters	2	0	02_004	Visit 3	Yes	5	33	14DEC15	2 times	2 to 7 ounces or about 1 fillet or 4-14 pieces of sushi	Yes	No	< 30 minutes / day	Moderate	Week 6	02	Early Termination	60	Female	12NOV15	111	Placebo	<250 mg/day	Yes	Yes	<250 mg/day	No	Yes	Yes	Yes	Yes
trying to limit my soda intake		walking		whitefish, oysters	2	0	02_004	Visit 3	Yes	5	34	15DEC15	2 times	2 to 7 ounces or about 1 fillet or 4-14 pieces of sushi	Yes	No	< 30 minutes / day	Moderate	Week 6	02	Early Termination	60	Female	12NOV15	111	Placebo	<250 mg/day	Yes	Yes	<250 mg/day	No	Yes	Yes	Yes	Yes
		walking		whitefish, oysters	2	1	02_004	Visit 3	Yes	6	35	16DEC15	2 times	2 to 7 ounces or about 1 fillet or 4-14 pieces of sushi	No	No	< 30 minutes / day	Moderate	Week 6	02	Early Termination	60	Female	12NOV15	111	Placebo	<250 mg/day	Yes	Yes	<250 mg/day	No	Yes	Yes	Yes	Yes
		walking		whitefish, oysters	2	1	02_004	Visit 3	Yes	6	36	17DEC15	2 times	2 to 7 ounces or about 1 fillet or 4-14 pieces of sushi	No	No	< 30 minutes / day	Moderate	Week 6	02	Early Termination	60	Female	12NOV15	111	Placebo	<250 mg/day	Yes	Yes	<250 mg/day	No	Yes	Yes	Yes	Yes
		walking		whitefish, oysters	2	1	02_004	Visit 3	Yes	6	37	18DEC15	2 times	2 to 7 ounces or about 1 fillet or 4-14 pieces of sushi	No	No	< 30 minutes / day	Moderate	Week 6	02	Early Termination	60	Female	12NOV15	111	Placebo	<250 mg/day	Yes	Yes	<250 mg/day	No	Yes	Yes	Yes	Yes
		walking		whitefish, oysters	2	1	02_004	Visit 3	Yes	6	38	19DEC15	2 times	2 to 7 ounces or about 1 fillet or 4-14 pieces of sushi	No	No	< 30 minutes / day	Moderate	Week 6	02	Early Termination	60	Female	12NOV15	111	Placebo	<250 mg/day	Yes	Yes	<250 mg/day	No	Yes	Yes	Yes	Yes
		walking		whitefish, oysters	2	1	02_004	Visit 3	Yes	6	39	20DEC15	2 times	2 to 7 ounces or about 1 fillet or 4-14 pieces of sushi	No	No	< 30 minutes / day	Moderate	Week 6	02	Early Termination	60	Female	12NOV15	111	Placebo	<250 mg/day	Yes	Yes	<250 mg/day	No	Yes	Yes	Yes	Yes
		walking		whitefish, oysters	2	1	02_004	Visit 3	Yes	6	40	21DEC15	2 times	2 to 7 ounces or about 1 fillet or 4-14 pieces of sushi	No	No	< 30 minutes / day	Moderate	Week 6	02	Early Termination	60	Female	12NOV15	111	Placebo	<250 mg/day	Yes	Yes	<250 mg/day	No	Yes	Yes	Yes	Yes
		walking		whitefish, oysters	2	1	02_004	Visit 3	Yes	6	41	22DEC15	2 times	2 to 7 ounces or about 1 fillet or 4-14 pieces of sushi	No	No	< 30 minutes / day	Moderate	Week 6	02	Early Termination	60	Female	12NOV15	111	Placebo	<250 mg/day	Yes	Yes	<250 mg/day	No	Yes	Yes	Yes	Yes
		Walking		Whitefish	2	1	02_004	Visit 4	Yes	7	42	23DEC15	2 times	2 to 7 ounces or about 1 fillet or 4-14 pieces of sushi	No	No	< 30 minutes / day	Moderate	Week 12	02	Early Termination	60	Female	12NOV15	111	Placebo	<250 mg/day	Yes	Yes	<250 mg/day	No	Yes	Yes	Yes	Yes
		Walking		Whitefish	2	1	02_004	Visit 4	Yes	7	43	24DEC15	2 times	2 to 7 ounces or about 1 fillet or 4-14 pieces of sushi	No	No	< 30 minutes / day	Moderate	Week 12	02	Early Termination	60	Female	12NOV15	111	Placebo	<250 mg/day	Yes	Yes	<250 mg/day	No	Yes	Yes	Yes	Yes
		Walking		Whitefish	2	1	02_004	Visit 4	Yes	7	44	25DEC15	2 times	2 to 7 ounces or about 1 fillet or 4-14 pieces of sushi	No	No	< 30 minutes / day	Moderate	Week 12	02	Early Termination	60	Female	12NOV15	111	Placebo	<250 mg/day	Yes	Yes	<250 mg/day	No	Yes	Yes	Yes	Yes
		Walking		Whitefish	2	1	02_004	Visit 4	Yes	7	45	26DEC15	2 times	2 to 7 ounces or about 1 fillet or 4-14 pieces of sushi	No	No	< 30 minutes / day	Moderate	Week 12	02	Early Termination	60	Female	12NOV15	111	Placebo	<250 mg/day	Yes	Yes	<250 mg/day	No	Yes	Yes	Yes	Yes
		Walking		Whitefish	2	1	02_004	Visit 4	Yes	7	46	27DEC15	2 times	2 to 7 ounces or about 1 fillet or 4-14 pieces of sushi	No	No	< 30 minutes / day	Moderate	Week 12	02	Early Termination	60	Female	12NOV15	111	Placebo	<250 mg/day	Yes	Yes	<250 mg/day	No	Yes	Yes	Yes	Yes
		Walking		Whitefish	2	1	02_004	Visit 4	Yes	7	47	28DEC15	2 times	2 to 7 ounces or about 1 fillet or 4-14 pieces of sushi	No	No	< 30 minutes / day	Moderate	Week 12	02	Early Termination	60	Female	12NOV15	111	Placebo	<250 mg/day	Yes	Yes	<250 mg/day	No	Yes	Yes	Yes	Yes
		Walking		Whitefish	2	1	02_004	Visit 4	Yes	7	48	29DEC15	2 times	2 to 7 ounces or about 1 fillet or 4-14 pieces of sushi	No	No	< 30 minutes / day	Moderate	Week 12	02	Early Termination	60	Female	12NOV15	111	Placebo	<250 mg/day	Yes	Yes	<250 mg/day	No	Yes	Yes	Yes	Yes
		walking		whitefish	2	1	02_004	Visit 4	Yes	8	49	30DEC15	2 times	2 to 7 ounces or about 1 fillet or 4-14 pieces of sushi	No	No	< 30 minutes / day	Moderate	Week 12	02	Early Termination	60	Female	12NOV15	111	Placebo	<250 mg/day	Yes	Yes	<250 mg/day	No	Yes	Yes	Yes	Yes
		walking		whitefish	2	1	02_004	Visit 4	Yes	8	50	31DEC15	2 times	2 to 7 ounces or about 1 fillet or 4-14 pieces of sushi	No	No	< 30 minutes / day	Moderate	Week 12	02	Early Termination	60	Female	12NOV15	111	Placebo	<250 mg/day	Yes	Yes	<250 mg/day	No	Yes	Yes	Yes	Yes
		walking		whitefish	2	1	02_004	Visit 4	Yes	8	51	01JAN16	2 times	2 to 7 ounces or about 1 fillet or 4-14 pieces of sushi	No	No	< 30 minutes / day	Moderate	Week 12	02	Early Termination	60	Female	12NOV15	111	Placebo	<250 mg/day	Yes	Yes	<250 mg/day	No	Yes	Yes	Yes	Yes
		walking		whitefish	2	1	02_004	Visit 4	Yes	8	52	02JAN16	2 times	2 to 7 ounces or about 1 fillet or 4-14 pieces of sushi	No	No	< 30 minutes / day	Moderate	Week 12	02	Early Termination	60	Female	12NOV15	111	Placebo	<250 mg/day	Yes	Yes	<250 mg/day	No	Yes	Yes	Yes	Yes
		walking		whitefish	2	1	02_004	Visit 4	Yes	8	53	03JAN16	2 times	2 to 7 ounces or about 1 fillet or 4-14 pieces of sushi	No	No	< 30 minutes / day	Moderate	Week 12	02	Early Termination	60	Female	12NOV15	111	Placebo	<250 mg/day	Yes	Yes	<250 mg/day	No	Yes	Yes	Yes	Yes
		walking		whitefish	2	1	02_004	Visit 4	Yes	8	54	04JAN16	2 times	2 to 7 ounces or about 1 fillet or 4-14 pieces of sushi	No	No	< 30 minutes / day	Moderate	Week 12	02	Early Termination	60	Female	12NOV15	111	Placebo	<250 mg/day	Yes	Yes	<250 mg/day	No	Yes	Yes	Yes	Yes
		walking		whitefish	2	1	02_004	Visit 4	Yes	8	55	05JAN16	2 times	2 to 7 ounces or about 1 fillet or 4-14 pieces of sushi	No	No	< 30 minutes / day	Moderate	Week 12	02	Early Termination	60	Female	12NOV15	111	Placebo	<250 mg/day	Yes	Yes	<250 mg/day	No	Yes	Yes	Yes	Yes
		walking		whitefish, oysters	2	1	02_004	Visit 4	Yes	9	56	05JAN16	2 times	2 to 7 ounces or about 1 fillet or 4-14 pieces of sushi	No	No	< 30 minutes / day	Moderate	Week 12	02	Early Termination	60	Female	12NOV15	111	Placebo	<250 mg/day	Yes	Yes	<250 mg/day	No	Yes	Yes	Yes	Yes
		walking		whitefish, oysters	2	1	02_004	Visit 4	Yes	9	57	06JAN16	2 times	2 to 7 ounces or about 1 fillet or 4-14 pieces of sushi	No	No	< 30 minutes / day	Moderate	Week 12	02	Early Termination	60	Female	12NOV15	111	Placebo	<250 mg/day	Yes	Yes	<250 mg/day	No	Yes	Yes	Yes	Yes
		walking		whitefish, oysters	2	1	02_004	Visit 4	Yes	9	58	07JAN16	2 times	2 to 7 ounces or about 1 fillet or 4-14 pieces of sushi	No	No	< 30 minutes / day	Moderate	Week 12	02	Early Termination	60	Female	12NOV15	111	Placebo	<250 mg/day	Yes	Yes	<250 mg/day	No	Yes	Yes	Yes	Yes
		walking		whitefish, oysters	2	1	02_004	Visit 4	Yes	9	59	08JAN16	2 times	2 to 7 ounces or about 1 fillet or 4-14 pieces of sushi	No	No	< 30 minutes / day	Moderate	Week 12	02	Early Termination	60	Female	12NOV15	111	Placebo	<250 mg/day	Yes	Yes	<250 mg/day	No	Yes	Yes	Yes	Yes
		walking		whitefish, oysters	2	1	02_004	Visit 4	Yes	9	60	09JAN16	2 times	2 to 7 ounces or about 1 fillet or 4-14 pieces of sushi	No	No	< 30 minutes / day	Moderate	Week 12	02	Early Termination	60	Female	12NOV15	111	Placebo	<250 mg/day	Yes	Yes	<250 mg/day	No	Yes	Yes	Yes	Yes
		walking		whitefish, oysters	2	1	02_004	Visit 4	Yes	9	61	10JAN16	2 times	2 to 7 ounces or about 1 fillet or 4-14 pieces of sushi	No	No	< 30 minutes / day	Moderate	Week 12	02	Early Termination	60	Female	12NOV15	111	Placebo	<250 mg/day	Yes	Yes	<250 mg/day	No	Yes	Yes	Yes	Yes
		walking		whitefish, oysters	2	1	02_004	Visit 4	Yes	9	62	11JAN16	2 times	2 to 7 ounces or about 1 fillet or 4-14 pieces of sushi	No	No	< 30 minutes / day	Moderate	Week 12	02	Early Termination	60	Female	12NOV15	111	Placebo	<250 mg/day	Yes	Yes	<250 mg/day	No	Yes	Yes	Yes	Yes
		walking		whitefish, oysters	2	0	02_004	Visit 4	Yes	10	63	13JAN16	2 times	2 to 7 ounces or about 1 fillet or 4-14 pieces of sushi	No	No	< 30 minutes / day	Moderate	Week 12	02	Early Termination	60	Female	12NOV15	111	Placebo	<250 mg/day	Yes	Yes	<250 mg/day	No	Yes	Yes	Yes	Yes
		walking		whitefish, oysters	2	0	02_004	Visit 4	Yes	10	64	14JAN16	2 times	2 to 7 ounces or about 1 fillet or 4-14 pieces of sushi	No	No	< 30 minutes / day	Moderate	Week 12	02	Early Termination	60	Female	12NOV15	111	Placebo	<250 mg/day	Yes	Yes	<250 mg/day	No	Yes	Yes	Yes	Yes
		walking		whitefish, oysters	2	0	02_004	Visit 4	Yes	10	65	15JAN16	2 times	2 to 7 ounces or about 1 fillet or 4-14 pieces of sushi	No	No	< 30 minutes / day	Moderate	Week 12	02	Early Termination	60	Female	12NOV15	111	Placebo	<250 mg/day	Yes	Yes	<250 mg/day	No	Yes	Yes	Yes	Yes
		walking		whitefish, oysters	2	0	02_004	Visit 4	Yes	10	66	16JAN16	2 times	2 to 7 ounces or about 1 fillet or 4-14 pieces of sushi	No	No	< 30 minutes / day	Moderate	Week 12	02	Early Termination	60	Female	12NOV15	111	Placebo	<250 mg/day	Yes	Yes	<250 mg/day	No	Yes	Yes	Yes	Yes
		walking		whitefish, oysters	2	0	02_004	Visit 4	Yes	10	67	17JAN16	2 times	2 to 7 ounces or about 1 fillet or 4-14 pieces of sushi	No	No	< 30 minutes / day	Moderate	Week 12	02	Early Termination	60	Female	12NOV15	111	Placebo	<250 mg/day	Yes	Yes	<250 mg/day	No	Yes	Yes	Yes	Yes
		walking		whitefish, oysters	2	0	02_004	Visit 4	Yes	10	68	18JAN16	2 times	2 to 7 ounces or about 1 fillet or 4-14 pieces of sushi	No	No	< 30 minutes / day	Moderate	Week 12	02	Early Termination	60	Female	12NOV15	111	Placebo	<250 mg/day	Yes	Yes	<250 mg/day	No	Yes	Yes	Yes	Yes
		walking		whitefish, oysters	2	0	02_004	Visit 4	Yes	10	69	19JAN16	2 times	2 to 7 ounces or about 1 fillet or 4-14 pieces of sushi	No	No	< 30 minutes / day	Moderate	Week 12	02	Early Termination	60	Female	12NOV15	111	Placebo	<250 mg/day	Yes	Yes	<250 mg/day	No	Yes	Yes	Yes	Yes
		Walking		Whitefish, oysters	2	1	02_004	Visit 4	Yes	11	70	20JAN16	2 times	2 to 7 ounces or about 1 fillet or 4-14 pieces of sushi	No	No	< 30 minutes / day	Moderate	Week 12	02	Early Termination	60	Female	12NOV15	111	Placebo	<250 mg/day	Yes	Yes	<250 mg/day	No	Yes	Yes	Yes	Yes
		Walking		Whitefish, oysters	2	1	02_004	Visit 4	Yes	11	71	21JAN16	2 times	2 to 7 ounces or about 1 fillet or 4-14 pieces of sushi	No	No	< 30 minutes / day	Moderate	Week 12	02	Early Termination	60	Female	12NOV15	111	Placebo	<250 mg/day	Yes	Yes	<250 mg/day	No	Yes	Yes	Yes	Yes
		Walking		Whitefish, oysters	2	1	02_004	Visit 4	Yes	11	72	22JAN16	2 times	2 to 7 ounces or about 1 fillet or 4-14 pieces of sushi	No	No	< 30 minutes / day	Moderate	Week 12	02	Early Termination	60	Female	12NOV15	111	Placebo	<250 mg/day	Yes	Yes	<250 mg/day	No	Yes	Yes	Yes	Yes
		Walking		Whitefish, oysters	2	1	02_004	Visit 4	Yes	11	73	23JAN16	2 times	2 to 7 ounces or about 1 fillet or 4-14 pieces of sushi	No	No	< 30 minutes / day	Moderate	Week 12	02	Early Termination	60	Female	12NOV15	111	Placebo	<250 mg/day	Yes	Yes	<250 mg/day	No	Yes	Yes	Yes	Yes
		Walking		Whitefish, oysters	2	1	02_004	Visit 4	Yes	11	74	24JAN16	2 times	2 to 7 ounces or about 1 fillet or 4-14 pieces of sushi	No	No	< 30 minutes / day	Moderate	Week 12	02	Early Termination	60	Female	12NOV15	111	Placebo	<250 mg/day	Yes	Yes	<250 mg/day	No	Yes	Yes	Yes	Yes
		Walking		Whitefish, oysters	2	1	02_004	Visit 4	Yes	11	75	25JAN16	2 times	2 to 7 ounces or about 1 fillet or 4-14 pieces of sushi	No	No	< 30 minutes / day	Moderate	Week 12	02	Early Termination	60	Female	12NOV15	111	Placebo	<250 mg/day	Yes	Yes	<250 mg/day	No	Yes	Yes	Yes	Yes
		Walking		Whitefish, oysters	2	1	02_004	Visit 4	Yes	11	76	26JAN16	2 times	2 to 7 ounces or about 1 fillet or 4-14 pieces of sushi	No	No	< 30 minutes / day	Moderate	Week 12	02	Early Termination	60	Female	12NOV15	111	Placebo	<250 mg/day	Yes	Yes	<250 mg/day	No	Yes	Yes	Yes	Yes
		walking		whitefish, oysters	2	1	02_004	Visit 4	Yes	12	77	27JAN16	2 times	2 to 7 ounces or about 1 fillet or 4-14 pieces of sushi	No	No	< 30 minutes / day	Moderate	Week 12	02	Early Termination	60	Female	12NOV15	111	Placebo	<250 mg/day	Yes	Yes	<250 mg/day	No	Yes	Yes	Yes	Yes
		walking		whitefish, oysters	2	1	02_004	Visit 4	Yes	12	78	28JAN16	2 times	2 to 7 ounces or about 1 fillet or 4-14 pieces of sushi	No	No	< 30 minutes / day	Moderate	Week 12	02	Early Termination	60	Female	12NOV15	111	Placebo	<250 mg/day	Yes	Yes	<250 mg/day	No	Yes	Yes	Yes	Yes
		walking		whitefish, oysters	2	1	02_004	Visit 4	Yes	12	79	29JAN16	2 times	2 to 7 ounces or about 1 fillet or 4-14 pieces of sushi	No	No	< 30 minutes / day	Moderate	Week 12	02	Early Termination	60	Female	12NOV15	111	Placebo	<250 mg/day	Yes	Yes	<250 mg/day	No	Yes	Yes	Yes	Yes
		walking		whitefish, oysters	2	1	02_004	Visit 4	Yes	12	80	30JAN16	2 times	2 to 7 ounces or about 1 fillet or 4-14 pieces of sushi	No	No	< 30 minutes / day	Moderate	Week 12	02	Early Termination	60	Female	12NOV15	111	Placebo	<250 mg/day	Yes	Yes	<250 mg/day	No	Yes	Yes	Yes	Yes
		walking		whitefish, oysters	2	1	02_004	Visit 4	Yes	12	81	31JAN16	2 times	2 to 7 ounces or about 1 fillet or 4-14 pieces of sushi	No	No	< 30 minutes / day	Moderate	Week 12	02	Early Termination	60	Female	12NOV15	111	Placebo	<250 mg/day	Yes	Yes	<250 mg/day	No	Yes	Yes	Yes	Yes
		walking		whitefish, oysters	2	1	02_004	Visit 4	Yes	12	82	01FEB16	2 times	2 to 7 ounces or about 1 fillet or 4-14 pieces of sushi	No	No	< 30 minutes / day	Moderate	Week 12	02	Early Termination	60	Female	12NOV15	111	Placebo	<250 mg/day	Yes	Yes	<250 mg/day	No	Yes	Yes	Yes	Yes
		walking		whitefish, oysters	2	1	02_004	Visit 4	Yes	12	83	02FEB16	2 times	2 to 7 ounces or about 1 fillet or 4-14 pieces of sushi	No	No	< 30 minutes / day	Moderate	Week 12	02	Early Termination	60	Female	12NOV15	111	Placebo	<250 mg/day	Yes	Yes	<250 mg/day	No	Yes	Yes	Yes	Yes
		walking		whitefish, oysters	2	1	02_004	Visit 5	Yes	13	84	03FEB16	2 times	2 to 7 ounces or about 1 fillet or 4-14 pieces of sushi	No	No	< 30 minutes / day	Moderate	Week 24	02	Early Termination	60	Female	12NOV15	111	Placebo	<250 mg/day	Yes	Yes	<250 mg/day	No	Yes	Yes	Yes	Yes
		walking		whitefish, oysters	2	1	02_004	Visit 5	Yes	13	85	04FEB16	2 times	2 to 7 ounces or about 1 fillet or 4-14 pieces of sushi	No	No	< 30 minutes / day	Moderate	Week 24	02	Early Termination	60	Female	12NOV15	111	Placebo	<250 mg/day	Yes	Yes	<250 mg/day	No	Yes	Yes	Yes	Yes
		walking		whitefish, oysters	2	1	02_004	Visit 5	Yes	13	86	05FEB16	2 times	2 to 7 ounces or about 1 fillet or 4-14 pieces of sushi	No	No	< 30 minutes / day	Moderate	Week 24	02	Early Termination	60	Female	12NOV15	111	Placebo	<250 mg/day	Yes	Yes	<250 mg/day	No	Yes	Yes	Yes	Yes
		walking		whitefish, oysters	2	1	02_004	Visit 5	Yes	13	87	06FEB16	2 times	2 to 7 ounces or about 1 fillet or 4-14 pieces of sushi	No	No	< 30 minutes / day	Moderate	Week 24	02	Early Termination	60	Female	12NOV15	111	Placebo	<250 mg/day	Yes	Yes	<250 mg/day	No	Yes	Yes	Yes	Yes
		walking		whitefish, oysters	2	1	02_004	Visit 5	Yes	13	88	07FEB16	2 times	2 to 7 ounces or about 1 fillet or 4-14 pieces of sushi	No	No	< 30 minutes / day	Moderate	Week 24	02	Early Termination	60	Female	12NOV15	111	Placebo	<250 mg/day	Yes	Yes	<250 mg/day	No	Yes	Yes	Yes	Yes
		walking		whitefish, oysters	2	1	02_004	Visit 5	Yes	13	89	08FEB16	2 times	2 to 7 ounces or about 1 fillet or 4-14 pieces of sushi	No	No	< 30 minutes / day	Moderate	Week 24	02	Early Termination	60	Female	12NOV15	111	Placebo	<250 mg/day	Yes	Yes	<250 mg/day	No	Yes	Yes	Yes	Yes
		walking		whitefish, oysters	2	1	02_004	Visit 5	Yes	13	90	09FEB16	2 times	2 to 7 ounces or about 1 fillet or 4-14 pieces of sushi	No	No	< 30 minutes / day	Moderate	Week 24	02	Early Termination	60	Female	12NOV15	111	Placebo	<250 mg/day	Yes	Yes	<250 mg/day	No	Yes	Yes	Yes	Yes
		walking		whitefish	2	2	02_004	Visit 5	Yes	14	91	10FEB16	2 times	2 to 7 ounces or about 1 fillet or 4-14 pieces of sushi	No	No	< 30 minutes / day	Moderate	Week 24	02	Early Termination	60	Female	12NOV15	111	Placebo	<250 mg/day	Yes	Yes	<250 mg/day	No	Yes	Yes	Yes	Yes
		walking		whitefish	2	2	02_004	Visit 5	Yes	14	92	11FEB16	2 times	2 to 7 ounces or about 1 fillet or 4-14 pieces of sushi	No	No	< 30 minutes / day	Moderate	Week 24	02	Early Termination	60	Female	12NOV15	111	Placebo	<250 mg/day	Yes	Yes	<250 mg/day	No	Yes	Yes	Yes	Yes
		walking		whitefish	2	2	02_004	Visit 5	Yes	14	93	12FEB16	2 times	2 to 7 ounces or about 1 fillet or 4-14 pieces of sushi	No	No	< 30 minutes / day	Moderate	Week 24	02	Early Termination	60	Female	12NOV15	111	Placebo	<250 mg/day	Yes	Yes	<250 mg/day	No	Yes	Yes	Yes	Yes
		walking		whitefish	2	2	02_004	Visit 5	Yes	14	94	13FEB16	2 times	2 to 7 ounces or about 1 fillet or 4-14 pieces of sushi	No	No	< 30 minutes / day	Moderate	Week 24	02	Early Termination	60	Female	12NOV15	111	Placebo	<250 mg/day	Yes	Yes	<250 mg/day	No	Yes	Yes	Yes	Yes
		walking		whitefish	2	2	02_004	Visit 5	Yes	14	95	14FEB16	2 times	2 to 7 ounces or about 1 fillet or 4-14 pieces of sushi	No	No	< 30 minutes / day	Moderate	Week 24	02	Early Termination	60	Female	12NOV15	111	Placebo	<250 mg/day	Yes	Yes	<250 mg/day	No	Yes	Yes	Yes	Yes
		walking		whitefish	2	2	02_004	Visit 5	Yes	14	96	15FEB16	2 times	2 to 7 ounces or about 1 fillet or 4-14 pieces of sushi	No	No	< 30 minutes / day	Moderate	Week 24	02	Early Termination	60	Female	12NOV15	111	Placebo	<250 mg/day	Yes	Yes	<250 mg/day	No	Yes	Yes	Yes	Yes
		walking		whitefish	2	2	02_004	Visit 5	Yes	14	97	16FEB16	2 times	2 to 7 ounces or about 1 fillet or 4-14 pieces of sushi	No	No	< 30 minutes / day	Moderate	Week 24	02	Early Termination	60	Female	12NOV15	111	Placebo	<250 mg/day	Yes	Yes	<250 mg/day	No	Yes	Yes	Yes	Yes
		walking		whitefish, oysters	2	2	02_004	Visit 5	Yes	15	98	17FEB16	2 times	2 to 7 ounces or about 1 fillet or 4-14 pieces of sushi	No	No	< 30 minutes / day	Moderate	Week 24	02	Early Termination	60	Female	12NOV15	111	Placebo	<250 mg/day	Yes	Yes	<250 mg/day	No	Yes	Yes	Yes	Yes
		walking		whitefish, oysters	2	2	02_004	Visit 5	Yes	15	99	18FEB16	2 times	2 to 7 ounces or about 1 fillet or 4-14 pieces of sushi	No	No	< 30 minutes / day	Moderate	Week 24	02	Early Termination	60	Female	12NOV15	111	Placebo	<250 mg/day	Yes	Yes	<250 mg/day	No	Yes	Yes	Yes	Yes
		walking		whitefish, oysters	2	2	02_004	Visit 5	Yes	15	100	19FEB16	2 times	2 to 7 ounces or about 1 fillet or 4-14 pieces of sushi	No	No	< 30 minutes / day	Moderate	Week 24	02	Early Termination	60	Female	12NOV15	111	Placebo	<250 mg/day	Yes	Yes	<250 mg/day	No	Yes	Yes	Yes	Yes
		walking		whitefish, oysters	2	2	02_004	Visit 5	Yes	15	101	20FEB16	2 times	2 to 7 ounces or about 1 fillet or 4-14 pieces of sushi	No	No	< 30 minutes / day	Moderate	Week 24	02	Early Termination	60	Female	12NOV15	111	Placebo	<250 mg/day	Yes	Yes	<250 mg/day	No	Yes	Yes	Yes	Yes
		walking		whitefish, oysters	2	2	02_004	Visit 5	Yes	15	102	21FEB16	2 times	2 to 7 ounces or about 1 fillet or 4-14 pieces of sushi	No	No	< 30 minutes / day	Moderate	Week 24	02	Early Termination	60	Female	12NOV15	111	Placebo	<250 mg/day	Yes	Yes	<250 mg/day	No	Yes	Yes	Yes	Yes
		walking		whitefish, oysters	2	2	02_004	Visit 5	Yes	15	103	22FEB16	2 times	2 to 7 ounces or about 1 fillet or 4-14 pieces of sushi	No	No	< 30 minutes / day	Moderate	Week 24	02	Early Termination	60	Female	12NOV15	111	Placebo	<250 mg/day	Yes	Yes	<250 mg/day	No	Yes	Yes	Yes	Yes
		walking		whitefish, oysters	2	2	02_004	Visit 5	Yes	15	104	23FEB16	2 times	2 to 7 ounces or about 1 fillet or 4-14 pieces of sushi	No	No	< 30 minutes / day	Moderate	Week 24	02	Early Termination	60	Female	12NOV15	111	Placebo	<250 mg/day	Yes	Yes	<250 mg/day	No	Yes	Yes	Yes	Yes
		walking		whitefish, oysters	2	2	02_004	Visit 5	Yes	16	105	24FEB16	2 times	2 to 7 ounces or about 1 fillet or 4-14 pieces of sushi	No	No	< 30 minutes / day	Moderate	Week 24	02	Early Termination	60	Female	12NOV15	111	Placebo	<250 mg/day	Yes	Yes	<250 mg/day	No	Yes	Yes	Yes	Yes
		walking		whitefish, oysters	2	2	02_004	Visit 5	Yes	16	106	25FEB16	2 times	2 to 7 ounces or about 1 fillet or 4-14 pieces of sushi	No	No	< 30 minutes / day	Moderate	Week 24	02	Early Termination	60	Female	12NOV15	111	Placebo	<250 mg/day	Yes	Yes	<250 mg/day	No	Yes	Yes	Yes	Yes
		walking		whitefish, oysters	2	2	02_004	Visit 5	Yes	16	107	26FEB16	2 times	2 to 7 ounces or about 1 fillet or 4-14 pieces of sushi	No	No	< 30 minutes / day	Moderate	Week 24	02	Early Termination	60	Female	12NOV15	111	Placebo	<250 mg/day	Yes	Yes	<250 mg/day	No	Yes	Yes	Yes	Yes
		walking		whitefish, oysters	2	2	02_004	Visit 5	Yes	16	108	27FEB16	2 times	2 to 7 ounces or about 1 fillet or 4-14 pieces of sushi	No	No	< 30 minutes / day	Moderate	Week 24	02	Early Termination	60	Female	12NOV15	111	Placebo	<250 mg/day	Yes	Yes	<250 mg/day	No	Yes	Yes	Yes	Yes
		walking		whitefish, oysters	2	2	02_004	Visit 5	Yes	16	109	28FEB16	2 times	2 to 7 ounces or about 1 fillet or 4-14 pieces of sushi	No	No	< 30 minutes / day	Moderate	Week 24	02	Early Termination	60	Female	12NOV15	111	Placebo	<250 mg/day	Yes	Yes	<250 mg/day	No	Yes	Yes	Yes	Yes
		walking		whitefish, oysters	2	2	02_004	Visit 5	Yes	16	110	29FEB16	2 times	2 to 7 ounces or about 1 fillet or 4-14 pieces of sushi	No	No	< 30 minutes / day	Moderate	Week 24	02	Early Termination	60	Female	12NOV15	111	Placebo	<250 mg/day	Yes	Yes	<250 mg/day	No	Yes	Yes	Yes	Yes
		walking		whitefish, oysters	2	2	02_004	Visit 5	Yes	16	111	01MAR16	2 times	2 to 7 ounces or about 1 fillet or 4-14 pieces of sushi	No	No	< 30 minutes / day	Moderate	Week 24	02	Early Termination	60	Female	12NOV15	111	Placebo	<250 mg/day	Yes	Yes	<250 mg/day	No	Yes	Yes	Yes	Yes
		walking		whitefish	2	2	02_004	Visit 5	Yes	17	112	02MAR16	2 times	2 to 7 ounces or about 1 fillet or 4-14 pieces of sushi	No	No	< 30 minutes / day	Moderate	Week 24	02	Early Termination	60	Female	12NOV15	111	Placebo	<250 mg/day	Yes	Yes	<250 mg/day	No	Yes	Yes	Yes	Yes
		walking		whitefish	2	2	02_004	Visit 5	Yes	17	113	03MAR16	2 times	2 to 7 ounces or about 1 fillet or 4-14 pieces of sushi	No	No	< 30 minutes / day	Moderate	Week 24	02	Early Termination	60	Female	12NOV15	111	Placebo	<250 mg/day	Yes	Yes	<250 mg/day	No	Yes	Yes	Yes	Yes
		walking		whitefish	2	2	02_004	Visit 5	Yes	17	114	04MAR16	2 times	2 to 7 ounces or about 1 fillet or 4-14 pieces of sushi	No	No	< 30 minutes / day	Moderate	Week 24	02	Early Termination	60	Female	12NOV15	111	Placebo	<250 mg/day	Yes	Yes	<250 mg/day	No	Yes	Yes	Yes	Yes
		walking		whitefish	2	2	02_004	Visit 5	Yes	17	115	05MAR16	2 times	2 to 7 ounces or about 1 fillet or 4-14 pieces of sushi	No	No	< 30 minutes / day	Moderate	Week 24	02	Early Termination	60	Female	12NOV15	111	Placebo	<250 mg/day	Yes	Yes	<250 mg/day	No	Yes	Yes	Yes	Yes
		walking		whitefish	2	2	02_004	Visit 5	Yes	17	116	06MAR16	2 times	2 to 7 ounces or about 1 fillet or 4-14 pieces of sushi	No	No	< 30 minutes / day	Moderate	Week 24	02	Early Termination	60	Female	12NOV15	111	Placebo	<250 mg/day	Yes	Yes	<250 mg/day	No	Yes	Yes	Yes	Yes
		walking		whitefish	2	2	02_004	Visit 5	Yes	17	117	07MAR16	2 times	2 to 7 ounces or about 1 fillet or 4-14 pieces of sushi	No	No	< 30 minutes / day	Moderate	Week 24	02	Early Termination	60	Female	12NOV15	111	Placebo	<250 mg/day	Yes	Yes	<250 mg/day	No	Yes	Yes	Yes	Yes
		walking		whitefish	2	2	02_004	Visit 5	Yes	17	118	08MAR16	2 times	2 to 7 ounces or about 1 fillet or 4-14 pieces of sushi	No	No	< 30 minutes / day	Moderate	Week 24	02	Early Termination	60	Female	12NOV15	111	Placebo	<250 mg/day	Yes	Yes	<250 mg/day	No	Yes	Yes	Yes	Yes
		walking		whitefish, oysters	2	2	02_004	Visit 5	Yes	18	119	09MAR16	2 times	2 to 7 ounces or about 1 fillet or 4-14 pieces of sushi	No	No	< 30 minutes / day	Moderate	Week 24	02	Early Termination	60	Female	12NOV15	111	Placebo	<250 mg/day	Yes	Yes	<250 mg/day	No	Yes	Yes	Yes	Yes
		walking		whitefish, oysters	2	2	02_004	Visit 5	Yes	18	120	10MAR16	2 times	2 to 7 ounces or about 1 fillet or 4-14 pieces of sushi	No	No	< 30 minutes / day	Moderate	Week 24	02	Early Termination	60	Female	12NOV15	111	Placebo	<250 mg/day	Yes	Yes	<250 mg/day	No	Yes	Yes	Yes	Yes
		walking		whitefish, oysters	2	2	02_004	Visit 5	Yes	18	121	11MAR16	2 times	2 to 7 ounces or about 1 fillet or 4-14 pieces of sushi	No	No	< 30 minutes / day	Moderate	Week 24	02	Early Termination	60	Female	12NOV15	111	Placebo	<250 mg/day	Yes	Yes	<250 mg/day	No	Yes	Yes	Yes	Yes
		walking		whitefish, oysters	2	2	02_004	Visit 5	Yes	18	122	12MAR16	2 times	2 to 7 ounces or about 1 fillet or 4-14 pieces of sushi	No	No	< 30 minutes / day	Moderate	Week 24	02	Early Termination	60	Female	12NOV15	111	Placebo	<250 mg/day	Yes	Yes	<250 mg/day	No	Yes	Yes	Yes	Yes
		walking		whitefish, oysters	2	2	02_004	Visit 5	Yes	18	123	13MAR16	2 times	2 to 7 ounces or about 1 fillet or 4-14 pieces of sushi	No	No	< 30 minutes / day	Moderate	Week 24	02	Early Termination	60	Female	12NOV15	111	Placebo	<250 mg/day	Yes	Yes	<250 mg/day	No	Yes	Yes	Yes	Yes
		walking		whitefish, oysters	2	2	02_004	Visit 5	Yes	18	124	14MAR16	2 times	2 to 7 ounces or about 1 fillet or 4-14 pieces of sushi	No	No	< 30 minutes / day	Moderate	Week 24	02	Early Termination	60	Female	12NOV15	111	Placebo	<250 mg/day	Yes	Yes	<250 mg/day	No	Yes	Yes	Yes	Yes
		walking		whitefish, oysters	2	2	02_004	Visit 5	Yes	18	125	15MAR16	2 times	2 to 7 ounces or about 1 fillet or 4-14 pieces of sushi	No	No	< 30 minutes / day	Moderate	Week 24	02	Early Termination	60	Female	12NOV15	111	Placebo	<250 mg/day	Yes	Yes	<250 mg/day	No	Yes	Yes	Yes	Yes
		walking		whitefish, oysters	2	2	02_004	Visit 5	Yes	19	126	16MAR16	2 times	2 to 7 ounces or about 1 fillet or 4-14 pieces of sushi	No	No	< 30 minutes / day	Moderate	Week 24	02	Early Termination	60	Female	12NOV15	111	Placebo	<250 mg/day	Yes	Yes	<250 mg/day	No	Yes	Yes	Yes	Yes
		walking		whitefish, oysters	2	2	02_004	Visit 5	Yes	19	127	17MAR16	2 times	2 to 7 ounces or about 1 fillet or 4-14 pieces of sushi	No	No	< 30 minutes / day	Moderate	Week 24	02	Early Termination	60	Female	12NOV15	111	Placebo	<250 mg/day	Yes	Yes	<250 mg/day	No	Yes	Yes	Yes	Yes
		walking		whitefish, oysters	2	2	02_004	Visit 5	Yes	19	128	18MAR16	2 times	2 to 7 ounces or about 1 fillet or 4-14 pieces of sushi	No	No	< 30 minutes / day	Moderate	Week 24	02	Early Termination	60	Female	12NOV15	111	Placebo	<250 mg/day	Yes	Yes	<250 mg/day	No	Yes	Yes	Yes	Yes
		walking		whitefish, oysters	2	2	02_004	Visit 5	Yes	19	129	19MAR16	2 times	2 to 7 ounces or about 1 fillet or 4-14 pieces of sushi	No	No	< 30 minutes / day	Moderate	Week 24	02	Early Termination	60	Female	12NOV15	111	Placebo	<250 mg/day	Yes	Yes	<250 mg/day	No	Yes	Yes	Yes	Yes
		walking		whitefish, oysters	2	2	02_004	Visit 5	Yes	19	130	20MAR16	2 times	2 to 7 ounces or about 1 fillet or 4-14 pieces of sushi	No	No	< 30 minutes / day	Moderate	Week 24	02	Early Termination	60	Female	12NOV15	111	Placebo	<250 mg/day	Yes	Yes	<250 mg/day	No	Yes	Yes	Yes	Yes
		walking		whitefish, oysters	2	2	02_004	Visit 5	Yes	19	131	21MAR16	2 times	2 to 7 ounces or about 1 fillet or 4-14 pieces of sushi	No	No	< 30 minutes / day	Moderate	Week 24	02	Early Termination	60	Female	12NOV15	111	Placebo	<250 mg/day	Yes	Yes	<250 mg/day	No	Yes	Yes	Yes	Yes
		walking		whitefish, oysters	2	2	02_004	Visit 5	Yes	19	132	22MAR16	2 times	2 to 7 ounces or about 1 fillet or 4-14 pieces of sushi	No	No	< 30 minutes / day	Moderate	Week 24	02	Early Termination	60	Female	12NOV15	111	Placebo	<250 mg/day	Yes	Yes	<250 mg/day	No	Yes	Yes	Yes	Yes
		walking		whitefish	2	2	02_004	Visit 5	Yes	20	133	23MAR16	2 times	2 to 7 ounces or about 1 fillet or 4-14 pieces of sushi	No	No	< 30 minutes / day	Moderate	Week 24	02	Early Termination	60	Female	12NOV15	111	Placebo	<250 mg/day	Yes	Yes	<250 mg/day	No	Yes	Yes	Yes	Yes
		walking		whitefish	2	2	02_004	Visit 5	Yes	20	134	24MAR16	2 times	2 to 7 ounces or about 1 fillet or 4-14 pieces of sushi	No	No	< 30 minutes / day	Moderate	Week 24	02	Early Termination	60	Female	12NOV15	111	Placebo	<250 mg/day	Yes	Yes	<250 mg/day	No	Yes	Yes	Yes	Yes
		walking		whitefish	2	2	02_004	Visit 5	Yes	20	135	25MAR16	2 times	2 to 7 ounces or about 1 fillet or 4-14 pieces of sushi	No	No	< 30 minutes / day	Moderate	Week 24	02	Early Termination	60	Female	12NOV15	111	Placebo	<250 mg/day	Yes	Yes	<250 mg/day	No	Yes	Yes	Yes	Yes
		walking		whitefish	2	2	02_004	Visit 5	Yes	20	136	26MAR16	2 times	2 to 7 ounces or about 1 fillet or 4-14 pieces of sushi	No	No	< 30 minutes / day	Moderate	Week 24	02	Early Termination	60	Female	12NOV15	111	Placebo	<250 mg/day	Yes	Yes	<250 mg/day	No	Yes	Yes	Yes	Yes
		walking		whitefish	2	2	02_004	Visit 5	Yes	20	137	27MAR16	2 times	2 to 7 ounces or about 1 fillet or 4-14 pieces of sushi	No	No	< 30 minutes / day	Moderate	Week 24	02	Early Termination	60	Female	12NOV15	111	Placebo	<250 mg/day	Yes	Yes	<250 mg/day	No	Yes	Yes	Yes	Yes
		walking		whitefish	2	2	02_004	Visit 5	Yes	20	138	28MAR16	2 times	2 to 7 ounces or about 1 fillet or 4-14 pieces of sushi	No	No	< 30 minutes / day	Moderate	Week 24	02	Early Termination	60	Female	12NOV15	111	Placebo	<250 mg/day	Yes	Yes	<250 mg/day	No	Yes	Yes	Yes	Yes
		walking		whitefish	2	2	02_004	Visit 5	Yes	20	139	29MAR16	2 times	2 to 7 ounces or about 1 fillet or 4-14 pieces of sushi	No	No	< 30 minutes / day	Moderate	Week 24	02	Early Termination	60	Female	12NOV15	111	Placebo	<250 mg/day	Yes	Yes	<250 mg/day	No	Yes	Yes	Yes	Yes
		walking/working		Grilled Salmon	Biscuit and Gravy plain twice	potato chips one time	02_005	Visit 3	Yes	1	0	04DEC15	1 time	More than 7 ounces or more than 1 fillet or more than 14 pieces of sushi	No	No	30 or more minutes / day	Moderate	Week 6	02	Entered	65	Male	04DEC15	112	Placebo	>=250 mg/day	No	No	>=250 mg/day	No	Yes	Yes	Yes	Yes
		walking/working		Grilled Salmon	Biscuit and Gravy plain twice	potato chips one time	02_005	Visit 3	Yes	1	1	05DEC15	1 time	More than 7 ounces or more than 1 fillet or more than 14 pieces of sushi	No	No	30 or more minutes / day	Moderate	Week 6	02	Entered	65	Male	04DEC15	112	Placebo	>=250 mg/day	No	No	>=250 mg/day	No	Yes	Yes	Yes	Yes
		walking/working		Grilled Salmon	Biscuit and Gravy plain twice	potato chips one time	02_005	Visit 3	Yes	1	2	06DEC15	1 time	More than 7 ounces or more than 1 fillet or more than 14 pieces of sushi	No	No	30 or more minutes / day	Moderate	Week 6	02	Entered	65	Male	04DEC15	112	Placebo	>=250 mg/day	No	No	>=250 mg/day	No	Yes	Yes	Yes	Yes
		walking/working		Grilled Salmon	Biscuit and Gravy plain twice	potato chips one time	02_005	Visit 3	Yes	1	3	07DEC15	1 time	More than 7 ounces or more than 1 fillet or more than 14 pieces of sushi	No	No	30 or more minutes / day	Moderate	Week 6	02	Entered	65	Male	04DEC15	112	Placebo	>=250 mg/day	No	No	>=250 mg/day	No	Yes	Yes	Yes	Yes
		walking/working		Grilled Salmon	Biscuit and Gravy plain twice	potato chips one time	02_005	Visit 3	Yes	1	4	08DEC15	1 time	More than 7 ounces or more than 1 fillet or more than 14 pieces of sushi	No	No	30 or more minutes / day	Moderate	Week 6	02	Entered	65	Male	04DEC15	112	Placebo	>=250 mg/day	No	No	>=250 mg/day	No	Yes	Yes	Yes	Yes
		walking/working		Grilled Salmon	Biscuit and Gravy plain twice	potato chips one time	02_005	Visit 3	Yes	1	5	09DEC15	1 time	More than 7 ounces or more than 1 fillet or more than 14 pieces of sushi	No	No	30 or more minutes / day	Moderate	Week 6	02	Entered	65	Male	04DEC15	112	Placebo	>=250 mg/day	No	No	>=250 mg/day	No	Yes	Yes	Yes	Yes
		walking/working		Grilled Salmon	Biscuit and Gravy plain twice	potato chips one time	02_005	Visit 3	Yes	1	6	10DEC15	1 time	More than 7 ounces or more than 1 fillet or more than 14 pieces of sushi	No	No	30 or more minutes / day	Moderate	Week 6	02	Entered	65	Male	04DEC15	112	Placebo	>=250 mg/day	No	No	>=250 mg/day	No	Yes	Yes	Yes	Yes
		walking at work		Grilled Salomn	3 times	none	02_005	Visit 3	Yes	2	7	10DEC15	More than 2 times	More than 7 ounces or more than 1 fillet or more than 14 pieces of sushi	Yes	No	30 or more minutes / day	Moderate	Week 6	02	Entered	65	Male	04DEC15	112	Placebo	>=250 mg/day	No	No	>=250 mg/day	No	Yes	Yes	Yes	Yes
		walking at work		Grilled Salomn	3 times	none	02_005	Visit 3	Yes	2	8	11DEC15	More than 2 times	More than 7 ounces or more than 1 fillet or more than 14 pieces of sushi	Yes	No	30 or more minutes / day	Moderate	Week 6	02	Entered	65	Male	04DEC15	112	Placebo	>=250 mg/day	No	No	>=250 mg/day	No	Yes	Yes	Yes	Yes
		walking at work		Grilled Salomn	3 times	none	02_005	Visit 3	Yes	2	9	12DEC15	More than 2 times	More than 7 ounces or more than 1 fillet or more than 14 pieces of sushi	Yes	No	30 or more minutes / day	Moderate	Week 6	02	Entered	65	Male	04DEC15	112	Placebo	>=250 mg/day	No	No	>=250 mg/day	No	Yes	Yes	Yes	Yes
		walking at work		Grilled Salomn	3 times	none	02_005	Visit 3	Yes	2	10	13DEC15	More than 2 times	More than 7 ounces or more than 1 fillet or more than 14 pieces of sushi	Yes	No	30 or more minutes / day	Moderate	Week 6	02	Entered	65	Male	04DEC15	112	Placebo	>=250 mg/day	No	No	>=250 mg/day	No	Yes	Yes	Yes	Yes
		walking at work		Grilled Salomn	3 times	none	02_005	Visit 3	Yes	2	11	14DEC15	More than 2 times	More than 7 ounces or more than 1 fillet or more than 14 pieces of sushi	Yes	No	30 or more minutes / day	Moderate	Week 6	02	Entered	65	Male	04DEC15	112	Placebo	>=250 mg/day	No	No	>=250 mg/day	No	Yes	Yes	Yes	Yes
		walking at work		Grilled Salomn	3 times	none	02_005	Visit 3	Yes	2	12	15DEC15	More than 2 times	More than 7 ounces or more than 1 fillet or more than 14 pieces of sushi	Yes	No	30 or more minutes / day	Moderate	Week 6	02	Entered	65	Male	04DEC15	112	Placebo	>=250 mg/day	No	No	>=250 mg/day	No	Yes	Yes	Yes	Yes
		walking at work		Grilled Salomn	3 times	none	02_005	Visit 3	Yes	2	13	16DEC15	More than 2 times	More than 7 ounces or more than 1 fillet or more than 14 pieces of sushi	Yes	No	30 or more minutes / day	Moderate	Week 6	02	Entered	65	Male	04DEC15	112	Placebo	>=250 mg/day	No	No	>=250 mg/day	No	Yes	Yes	Yes	Yes
		walking		Grilled Rainbow Trout and grilled salomn	two	none	02_005	Visit 3	Yes	3	14	17DEC15	1 time	More than 7 ounces or more than 1 fillet or more than 14 pieces of sushi	Yes	No	30 or more minutes / day	Moderate	Week 6	02	Entered	65	Male	04DEC15	112	Placebo	>=250 mg/day	No	No	>=250 mg/day	No	Yes	Yes	Yes	Yes
		walking		Grilled Rainbow Trout and grilled salomn	two	none	02_005	Visit 3	Yes	3	15	18DEC15	1 time	More than 7 ounces or more than 1 fillet or more than 14 pieces of sushi	Yes	No	30 or more minutes / day	Moderate	Week 6	02	Entered	65	Male	04DEC15	112	Placebo	>=250 mg/day	No	No	>=250 mg/day	No	Yes	Yes	Yes	Yes
		walking		Grilled Rainbow Trout and grilled salomn	two	none	02_005	Visit 3	Yes	3	16	19DEC15	1 time	More than 7 ounces or more than 1 fillet or more than 14 pieces of sushi	Yes	No	30 or more minutes / day	Moderate	Week 6	02	Entered	65	Male	04DEC15	112	Placebo	>=250 mg/day	No	No	>=250 mg/day	No	Yes	Yes	Yes	Yes
		walking		Grilled Rainbow Trout and grilled salomn	two	none	02_005	Visit 3	Yes	3	17	20DEC15	1 time	More than 7 ounces or more than 1 fillet or more than 14 pieces of sushi	Yes	No	30 or more minutes / day	Moderate	Week 6	02	Entered	65	Male	04DEC15	112	Placebo	>=250 mg/day	No	No	>=250 mg/day	No	Yes	Yes	Yes	Yes
		walking		Grilled Rainbow Trout and grilled salomn	two	none	02_005	Visit 3	Yes	3	18	21DEC15	1 time	More than 7 ounces or more than 1 fillet or more than 14 pieces of sushi	Yes	No	30 or more minutes / day	Moderate	Week 6	02	Entered	65	Male	04DEC15	112	Placebo	>=250 mg/day	No	No	>=250 mg/day	No	Yes	Yes	Yes	Yes
		walking		Grilled Rainbow Trout and grilled salomn	two	none	02_005	Visit 3	Yes	3	19	22DEC15	1 time	More than 7 ounces or more than 1 fillet or more than 14 pieces of sushi	Yes	No	30 or more minutes / day	Moderate	Week 6	02	Entered	65	Male	04DEC15	112	Placebo	>=250 mg/day	No	No	>=250 mg/day	No	Yes	Yes	Yes	Yes
		walking		Grilled Rainbow Trout and grilled salomn	two	none	02_005	Visit 3	Yes	3	20	23DEC15	1 time	More than 7 ounces or more than 1 fillet or more than 14 pieces of sushi	Yes	No	30 or more minutes / day	Moderate	Week 6	02	Entered	65	Male	04DEC15	112	Placebo	>=250 mg/day	No	No	>=250 mg/day	No	Yes	Yes	Yes	Yes
		walking		Grilled Salmon	4 biscuit and Gravy plain and 1 chicken strip sand	1 time for potato chips about 12 chips.	02_005	Visit 3	Yes	4	21	24DEC15	1 time	2 to 7 ounces or about 1 fillet or 4-14 pieces of sushi	No	Yes	30 or more minutes / day	Light	Week 6	02	Entered	65	Male	04DEC15	112	Placebo	>=250 mg/day	No	No	>=250 mg/day	No	Yes	Yes	Yes	Yes
		walking		Grilled Salmon	4 biscuit and Gravy plain and 1 chicken strip sand	1 time for potato chips about 12 chips.	02_005	Visit 3	Yes	4	22	25DEC15	1 time	2 to 7 ounces or about 1 fillet or 4-14 pieces of sushi	No	Yes	30 or more minutes / day	Light	Week 6	02	Entered	65	Male	04DEC15	112	Placebo	>=250 mg/day	No	No	>=250 mg/day	No	Yes	Yes	Yes	Yes
		walking		Grilled Salmon	4 biscuit and Gravy plain and 1 chicken strip sand	1 time for potato chips about 12 chips.	02_005	Visit 3	Yes	4	23	26DEC15	1 time	2 to 7 ounces or about 1 fillet or 4-14 pieces of sushi	No	Yes	30 or more minutes / day	Light	Week 6	02	Entered	65	Male	04DEC15	112	Placebo	>=250 mg/day	No	No	>=250 mg/day	No	Yes	Yes	Yes	Yes
		walking		Grilled Salmon	4 biscuit and Gravy plain and 1 chicken strip sand	1 time for potato chips about 12 chips.	02_005	Visit 3	Yes	4	24	27DEC15	1 time	2 to 7 ounces or about 1 fillet or 4-14 pieces of sushi	No	Yes	30 or more minutes / day	Light	Week 6	02	Entered	65	Male	04DEC15	112	Placebo	>=250 mg/day	No	No	>=250 mg/day	No	Yes	Yes	Yes	Yes
		walking		Grilled Salmon	4 biscuit and Gravy plain and 1 chicken strip sand	1 time for potato chips about 12 chips.	02_005	Visit 3	Yes	4	25	28DEC15	1 time	2 to 7 ounces or about 1 fillet or 4-14 pieces of sushi	No	Yes	30 or more minutes / day	Light	Week 6	02	Entered	65	Male	04DEC15	112	Placebo	>=250 mg/day	No	No	>=250 mg/day	No	Yes	Yes	Yes	Yes
		walking		Grilled Salmon	4 biscuit and Gravy plain and 1 chicken strip sand	1 time for potato chips about 12 chips.	02_005	Visit 3	Yes	4	26	29DEC15	1 time	2 to 7 ounces or about 1 fillet or 4-14 pieces of sushi	No	Yes	30 or more minutes / day	Light	Week 6	02	Entered	65	Male	04DEC15	112	Placebo	>=250 mg/day	No	No	>=250 mg/day	No	Yes	Yes	Yes	Yes
		walking		Grilled Salmon	4 biscuit and Gravy plain and 1 chicken strip sand	1 time for potato chips about 12 chips.	02_005	Visit 3	Yes	4	27	30DEC15	1 time	2 to 7 ounces or about 1 fillet or 4-14 pieces of sushi	No	Yes	30 or more minutes / day	Light	Week 6	02	Entered	65	Male	04DEC15	112	Placebo	>=250 mg/day	No	No	>=250 mg/day	No	Yes	Yes	Yes	Yes
		walking		salmon	2 times	none	02_005	Visit 3	Yes	5	28	31DEC15	1 time	More than 7 ounces or more than 1 fillet or more than 14 pieces of sushi	No	No	30 or more minutes / day	Moderate	Week 6	02	Entered	65	Male	04DEC15	112	Placebo	>=250 mg/day	No	No	>=250 mg/day	No	Yes	Yes	Yes	Yes
		walking		salmon	2 times	none	02_005	Visit 3	Yes	5	29	01JAN16	1 time	More than 7 ounces or more than 1 fillet or more than 14 pieces of sushi	No	No	30 or more minutes / day	Moderate	Week 6	02	Entered	65	Male	04DEC15	112	Placebo	>=250 mg/day	No	No	>=250 mg/day	No	Yes	Yes	Yes	Yes
		walking		salmon	2 times	none	02_005	Visit 3	Yes	5	30	02JAN16	1 time	More than 7 ounces or more than 1 fillet or more than 14 pieces of sushi	No	No	30 or more minutes / day	Moderate	Week 6	02	Entered	65	Male	04DEC15	112	Placebo	>=250 mg/day	No	No	>=250 mg/day	No	Yes	Yes	Yes	Yes
		walking		salmon	2 times	none	02_005	Visit 3	Yes	5	31	03JAN16	1 time	More than 7 ounces or more than 1 fillet or more than 14 pieces of sushi	No	No	30 or more minutes / day	Moderate	Week 6	02	Entered	65	Male	04DEC15	112	Placebo	>=250 mg/day	No	No	>=250 mg/day	No	Yes	Yes	Yes	Yes
		walking		salmon	2 times	none	02_005	Visit 3	Yes	5	32	04JAN16	1 time	More than 7 ounces or more than 1 fillet or more than 14 pieces of sushi	No	No	30 or more minutes / day	Moderate	Week 6	02	Entered	65	Male	04DEC15	112	Placebo	>=250 mg/day	No	No	>=250 mg/day	No	Yes	Yes	Yes	Yes
		walking		salmon	2 times	none	02_005	Visit 3	Yes	5	33	05JAN16	1 time	More than 7 ounces or more than 1 fillet or more than 14 pieces of sushi	No	No	30 or more minutes / day	Moderate	Week 6	02	Entered	65	Male	04DEC15	112	Placebo	>=250 mg/day	No	No	>=250 mg/day	No	Yes	Yes	Yes	Yes
		walking		salmon	2 times	none	02_005	Visit 3	Yes	5	34	06JAN16	1 time	More than 7 ounces or more than 1 fillet or more than 14 pieces of sushi	No	No	30 or more minutes / day	Moderate	Week 6	02	Entered	65	Male	04DEC15	112	Placebo	>=250 mg/day	No	No	>=250 mg/day	No	Yes	Yes	Yes	Yes
		Walking		salmon	2 times	none	02_005	Visit 3	Yes	6	35	07JAN16	2 times	2 to 7 ounces or about 1 fillet or 4-14 pieces of sushi	No	No	30 or more minutes / day	Moderate	Week 6	02	Entered	65	Male	04DEC15	112	Placebo	>=250 mg/day	No	No	>=250 mg/day	No	Yes	Yes	Yes	Yes
		Walking		salmon	2 times	none	02_005	Visit 3	Yes	6	36	08JAN16	2 times	2 to 7 ounces or about 1 fillet or 4-14 pieces of sushi	No	No	30 or more minutes / day	Moderate	Week 6	02	Entered	65	Male	04DEC15	112	Placebo	>=250 mg/day	No	No	>=250 mg/day	No	Yes	Yes	Yes	Yes
		Walking		salmon	2 times	none	02_005	Visit 3	Yes	6	37	09JAN16	2 times	2 to 7 ounces or about 1 fillet or 4-14 pieces of sushi	No	No	30 or more minutes / day	Moderate	Week 6	02	Entered	65	Male	04DEC15	112	Placebo	>=250 mg/day	No	No	>=250 mg/day	No	Yes	Yes	Yes	Yes
		Walking		salmon	2 times	none	02_005	Visit 3	Yes	6	38	10JAN16	2 times	2 to 7 ounces or about 1 fillet or 4-14 pieces of sushi	No	No	30 or more minutes / day	Moderate	Week 6	02	Entered	65	Male	04DEC15	112	Placebo	>=250 mg/day	No	No	>=250 mg/day	No	Yes	Yes	Yes	Yes
		Walking		salmon	2 times	none	02_005	Visit 3	Yes	6	39	11JAN16	2 times	2 to 7 ounces or about 1 fillet or 4-14 pieces of sushi	No	No	30 or more minutes / day	Moderate	Week 6	02	Entered	65	Male	04DEC15	112	Placebo	>=250 mg/day	No	No	>=250 mg/day	No	Yes	Yes	Yes	Yes
		Walking		salmon	2 times	none	02_005	Visit 3	Yes	6	40	12JAN16	2 times	2 to 7 ounces or about 1 fillet or 4-14 pieces of sushi	No	No	30 or more minutes / day	Moderate	Week 6	02	Entered	65	Male	04DEC15	112	Placebo	>=250 mg/day	No	No	>=250 mg/day	No	Yes	Yes	Yes	Yes
		Walking		salmon	2 times	none	02_005	Visit 3	Yes	6	41	13JAN16	2 times	2 to 7 ounces or about 1 fillet or 4-14 pieces of sushi	No	No	30 or more minutes / day	Moderate	Week 6	02	Entered	65	Male	04DEC15	112	Placebo	>=250 mg/day	No	No	>=250 mg/day	No	Yes	Yes	Yes	Yes
		Work		Tuna	1	0	02_005	Visit 4	Yes	7	42	14JAN15	1 time	Less than 2 ounces or less than one fillet or less than 4 pieces of sushi	No	No	< 30 minutes / day	Light	Week 12	02	Entered	65	Male	04DEC15	112	Placebo	>=250 mg/day	No	No	>=250 mg/day	No	Yes	Yes	Yes	Yes
		Work		Tuna	1	0	02_005	Visit 4	Yes	7	43	15JAN15	1 time	Less than 2 ounces or less than one fillet or less than 4 pieces of sushi	No	No	< 30 minutes / day	Light	Week 12	02	Entered	65	Male	04DEC15	112	Placebo	>=250 mg/day	No	No	>=250 mg/day	No	Yes	Yes	Yes	Yes
		Work		Tuna	1	0	02_005	Visit 4	Yes	7	44	16JAN15	1 time	Less than 2 ounces or less than one fillet or less than 4 pieces of sushi	No	No	< 30 minutes / day	Light	Week 12	02	Entered	65	Male	04DEC15	112	Placebo	>=250 mg/day	No	No	>=250 mg/day	No	Yes	Yes	Yes	Yes
		Work		Tuna	1	0	02_005	Visit 4	Yes	7	45	17JAN15	1 time	Less than 2 ounces or less than one fillet or less than 4 pieces of sushi	No	No	< 30 minutes / day	Light	Week 12	02	Entered	65	Male	04DEC15	112	Placebo	>=250 mg/day	No	No	>=250 mg/day	No	Yes	Yes	Yes	Yes
		Work		Tuna	1	0	02_005	Visit 4	Yes	7	46	18JAN15	1 time	Less than 2 ounces or less than one fillet or less than 4 pieces of sushi	No	No	< 30 minutes / day	Light	Week 12	02	Entered	65	Male	04DEC15	112	Placebo	>=250 mg/day	No	No	>=250 mg/day	No	Yes	Yes	Yes	Yes
		Work		Tuna	1	0	02_005	Visit 4	Yes	7	47	19JAN15	1 time	Less than 2 ounces or less than one fillet or less than 4 pieces of sushi	No	No	< 30 minutes / day	Light	Week 12	02	Entered	65	Male	04DEC15	112	Placebo	>=250 mg/day	No	No	>=250 mg/day	No	Yes	Yes	Yes	Yes
		Work		Tuna	1	0	02_005	Visit 4	Yes	7	48	20JAN15	1 time	Less than 2 ounces or less than one fillet or less than 4 pieces of sushi	No	No	< 30 minutes / day	Light	Week 12	02	Entered	65	Male	04DEC15	112	Placebo	>=250 mg/day	No	No	>=250 mg/day	No	Yes	Yes	Yes	Yes
		walking		salmon	3 times	none	02_005	Visit 4	Yes	8	49	21JAN16	1 time	2 to 7 ounces or about 1 fillet or 4-14 pieces of sushi	No	No	30 or more minutes / day	Moderate	Week 12	02	Entered	65	Male	04DEC15	112	Placebo	>=250 mg/day	No	No	>=250 mg/day	No	Yes	Yes	Yes	Yes
		walking		salmon	3 times	none	02_005	Visit 4	Yes	8	50	22JAN16	1 time	2 to 7 ounces or about 1 fillet or 4-14 pieces of sushi	No	No	30 or more minutes / day	Moderate	Week 12	02	Entered	65	Male	04DEC15	112	Placebo	>=250 mg/day	No	No	>=250 mg/day	No	Yes	Yes	Yes	Yes
		walking		salmon	3 times	none	02_005	Visit 4	Yes	8	51	23JAN16	1 time	2 to 7 ounces or about 1 fillet or 4-14 pieces of sushi	No	No	30 or more minutes / day	Moderate	Week 12	02	Entered	65	Male	04DEC15	112	Placebo	>=250 mg/day	No	No	>=250 mg/day	No	Yes	Yes	Yes	Yes
		walking		salmon	3 times	none	02_005	Visit 4	Yes	8	52	24JAN16	1 time	2 to 7 ounces or about 1 fillet or 4-14 pieces of sushi	No	No	30 or more minutes / day	Moderate	Week 12	02	Entered	65	Male	04DEC15	112	Placebo	>=250 mg/day	No	No	>=250 mg/day	No	Yes	Yes	Yes	Yes
		walking		salmon	3 times	none	02_005	Visit 4	Yes	8	53	25JAN16	1 time	2 to 7 ounces or about 1 fillet or 4-14 pieces of sushi	No	No	30 or more minutes / day	Moderate	Week 12	02	Entered	65	Male	04DEC15	112	Placebo	>=250 mg/day	No	No	>=250 mg/day	No	Yes	Yes	Yes	Yes
		walking		salmon	3 times	none	02_005	Visit 4	Yes	8	54	26JAN16	1 time	2 to 7 ounces or about 1 fillet or 4-14 pieces of sushi	No	No	30 or more minutes / day	Moderate	Week 12	02	Entered	65	Male	04DEC15	112	Placebo	>=250 mg/day	No	No	>=250 mg/day	No	Yes	Yes	Yes	Yes
		walking		salmon	3 times	none	02_005	Visit 4	Yes	8	55	27JAN16	1 time	2 to 7 ounces or about 1 fillet or 4-14 pieces of sushi	No	No	30 or more minutes / day	Moderate	Week 12	02	Entered	65	Male	04DEC15	112	Placebo	>=250 mg/day	No	No	>=250 mg/day	No	Yes	Yes	Yes	Yes
		Work		Grilled Salmon	1	0	02_005	Visit 4	Yes	9	56	29JAN16	2 times	More than 7 ounces or more than 1 fillet or more than 14 pieces of sushi	No	No	< 30 minutes / day	Moderate	Week 12	02	Entered	65	Male	04DEC15	112	Placebo	>=250 mg/day	No	No	>=250 mg/day	No	Yes	Yes	Yes	Yes
		Work		Grilled Salmon	1	0	02_005	Visit 4	Yes	9	57	30JAN16	2 times	More than 7 ounces or more than 1 fillet or more than 14 pieces of sushi	No	No	< 30 minutes / day	Moderate	Week 12	02	Entered	65	Male	04DEC15	112	Placebo	>=250 mg/day	No	No	>=250 mg/day	No	Yes	Yes	Yes	Yes
		Work		Grilled Salmon	1	0	02_005	Visit 4	Yes	9	58	31JAN16	2 times	More than 7 ounces or more than 1 fillet or more than 14 pieces of sushi	No	No	< 30 minutes / day	Moderate	Week 12	02	Entered	65	Male	04DEC15	112	Placebo	>=250 mg/day	No	No	>=250 mg/day	No	Yes	Yes	Yes	Yes
		Work		Grilled Salmon	1	0	02_005	Visit 4	Yes	9	59	01FEB16	2 times	More than 7 ounces or more than 1 fillet or more than 14 pieces of sushi	No	No	< 30 minutes / day	Moderate	Week 12	02	Entered	65	Male	04DEC15	112	Placebo	>=250 mg/day	No	No	>=250 mg/day	No	Yes	Yes	Yes	Yes
		Work		Grilled Salmon	1	0	02_005	Visit 4	Yes	9	60	02FEB16	2 times	More than 7 ounces or more than 1 fillet or more than 14 pieces of sushi	No	No	< 30 minutes / day	Moderate	Week 12	02	Entered	65	Male	04DEC15	112	Placebo	>=250 mg/day	No	No	>=250 mg/day	No	Yes	Yes	Yes	Yes
		Work		Grilled Salmon	1	0	02_005	Visit 4	Yes	9	61	03FEB16	2 times	More than 7 ounces or more than 1 fillet or more than 14 pieces of sushi	No	No	< 30 minutes / day	Moderate	Week 12	02	Entered	65	Male	04DEC15	112	Placebo	>=250 mg/day	No	No	>=250 mg/day	No	Yes	Yes	Yes	Yes
		Work		Grilled Salmon	1	0	02_005	Visit 4	Yes	9	62	04FEB16	2 times	More than 7 ounces or more than 1 fillet or more than 14 pieces of sushi	No	No	< 30 minutes / day	Moderate	Week 12	02	Entered	65	Male	04DEC15	112	Placebo	>=250 mg/day	No	No	>=250 mg/day	No	Yes	Yes	Yes	Yes
		Work		Salmon	1	1	02_005	Visit 4	Yes	10	63	05FEB16	2 times	2 to 7 ounces or about 1 fillet or 4-14 pieces of sushi	No	No	< 30 minutes / day	Moderate	Week 12	02	Entered	65	Male	04DEC15	112	Placebo	>=250 mg/day	No	No	>=250 mg/day	No	Yes	Yes	Yes	Yes
		Work		Salmon	1	1	02_005	Visit 4	Yes	10	64	06FEB16	2 times	2 to 7 ounces or about 1 fillet or 4-14 pieces of sushi	No	No	< 30 minutes / day	Moderate	Week 12	02	Entered	65	Male	04DEC15	112	Placebo	>=250 mg/day	No	No	>=250 mg/day	No	Yes	Yes	Yes	Yes
		Work		Salmon	1	1	02_005	Visit 4	Yes	10	65	07FEB16	2 times	2 to 7 ounces or about 1 fillet or 4-14 pieces of sushi	No	No	< 30 minutes / day	Moderate	Week 12	02	Entered	65	Male	04DEC15	112	Placebo	>=250 mg/day	No	No	>=250 mg/day	No	Yes	Yes	Yes	Yes
		Work		Salmon	1	1	02_005	Visit 4	Yes	10	66	08FEB16	2 times	2 to 7 ounces or about 1 fillet or 4-14 pieces of sushi	No	No	< 30 minutes / day	Moderate	Week 12	02	Entered	65	Male	04DEC15	112	Placebo	>=250 mg/day	No	No	>=250 mg/day	No	Yes	Yes	Yes	Yes
		Work		Salmon	1	1	02_005	Visit 4	Yes	10	67	09FEB16	2 times	2 to 7 ounces or about 1 fillet or 4-14 pieces of sushi	No	No	< 30 minutes / day	Moderate	Week 12	02	Entered	65	Male	04DEC15	112	Placebo	>=250 mg/day	No	No	>=250 mg/day	No	Yes	Yes	Yes	Yes
		Work		Salmon	1	1	02_005	Visit 4	Yes	10	68	10FEB16	2 times	2 to 7 ounces or about 1 fillet or 4-14 pieces of sushi	No	No	< 30 minutes / day	Moderate	Week 12	02	Entered	65	Male	04DEC15	112	Placebo	>=250 mg/day	No	No	>=250 mg/day	No	Yes	Yes	Yes	Yes
		Work		Salmon	1	1	02_005	Visit 4	Yes	10	69	11FEB16	2 times	2 to 7 ounces or about 1 fillet or 4-14 pieces of sushi	No	No	< 30 minutes / day	Moderate	Week 12	02	Entered	65	Male	04DEC15	112	Placebo	>=250 mg/day	No	No	>=250 mg/day	No	Yes	Yes	Yes	Yes
		Work		Salmon	1	1	02_005	Visit 4	Yes	11	70	12FEB16	1 time	More than 7 ounces or more than 1 fillet or more than 14 pieces of sushi	No	No	< 30 minutes / day	Moderate	Week 12	02	Entered	65	Male	04DEC15	112	Placebo	>=250 mg/day	No	No	>=250 mg/day	No	Yes	Yes	Yes	Yes
		Work		Salmon	1	1	02_005	Visit 4	Yes	11	71	13FEB16	1 time	More than 7 ounces or more than 1 fillet or more than 14 pieces of sushi	No	No	< 30 minutes / day	Moderate	Week 12	02	Entered	65	Male	04DEC15	112	Placebo	>=250 mg/day	No	No	>=250 mg/day	No	Yes	Yes	Yes	Yes
		Work		Salmon	1	1	02_005	Visit 4	Yes	11	72	14FEB16	1 time	More than 7 ounces or more than 1 fillet or more than 14 pieces of sushi	No	No	< 30 minutes / day	Moderate	Week 12	02	Entered	65	Male	04DEC15	112	Placebo	>=250 mg/day	No	No	>=250 mg/day	No	Yes	Yes	Yes	Yes
		Work		Salmon	1	1	02_005	Visit 4	Yes	11	73	15FEB16	1 time	More than 7 ounces or more than 1 fillet or more than 14 pieces of sushi	No	No	< 30 minutes / day	Moderate	Week 12	02	Entered	65	Male	04DEC15	112	Placebo	>=250 mg/day	No	No	>=250 mg/day	No	Yes	Yes	Yes	Yes
		Work		Salmon	1	1	02_005	Visit 4	Yes	11	74	16FEB16	1 time	More than 7 ounces or more than 1 fillet or more than 14 pieces of sushi	No	No	< 30 minutes / day	Moderate	Week 12	02	Entered	65	Male	04DEC15	112	Placebo	>=250 mg/day	No	No	>=250 mg/day	No	Yes	Yes	Yes	Yes
		Work		Salmon	1	1	02_005	Visit 4	Yes	11	75	17FEB16	1 time	More than 7 ounces or more than 1 fillet or more than 14 pieces of sushi	No	No	< 30 minutes / day	Moderate	Week 12	02	Entered	65	Male	04DEC15	112	Placebo	>=250 mg/day	No	No	>=250 mg/day	No	Yes	Yes	Yes	Yes
		Work		Salmon	1	1	02_005	Visit 4	Yes	11	76	18FEB16	1 time	More than 7 ounces or more than 1 fillet or more than 14 pieces of sushi	No	No	< 30 minutes / day	Moderate	Week 12	02	Entered	65	Male	04DEC15	112	Placebo	>=250 mg/day	No	No	>=250 mg/day	No	Yes	Yes	Yes	Yes
		work			0	1	02_005	Visit 4	Yes	12	77	19FEB16	0 (not at all) (if 0, skip questions 2 and 3)		No	No	< 30 minutes / day	Moderate	Week 12	02	Entered	65	Male	04DEC15	112	Placebo	>=250 mg/day	No	No	>=250 mg/day	No	Yes	Yes	Yes	Yes
		work			0	1	02_005	Visit 4	Yes	12	78	20FEB16	0 (not at all) (if 0, skip questions 2 and 3)		No	No	< 30 minutes / day	Moderate	Week 12	02	Entered	65	Male	04DEC15	112	Placebo	>=250 mg/day	No	No	>=250 mg/day	No	Yes	Yes	Yes	Yes
		work			0	1	02_005	Visit 4	Yes	12	79	21FEB16	0 (not at all) (if 0, skip questions 2 and 3)		No	No	< 30 minutes / day	Moderate	Week 12	02	Entered	65	Male	04DEC15	112	Placebo	>=250 mg/day	No	No	>=250 mg/day	No	Yes	Yes	Yes	Yes
		work			0	1	02_005	Visit 4	Yes	12	80	22FEB16	0 (not at all) (if 0, skip questions 2 and 3)		No	No	< 30 minutes / day	Moderate	Week 12	02	Entered	65	Male	04DEC15	112	Placebo	>=250 mg/day	No	No	>=250 mg/day	No	Yes	Yes	Yes	Yes
		work			0	1	02_005	Visit 4	Yes	12	81	23FEB16	0 (not at all) (if 0, skip questions 2 and 3)		No	No	< 30 minutes / day	Moderate	Week 12	02	Entered	65	Male	04DEC15	112	Placebo	>=250 mg/day	No	No	>=250 mg/day	No	Yes	Yes	Yes	Yes
		work			0	1	02_005	Visit 4	Yes	12	82	24FEB16	0 (not at all) (if 0, skip questions 2 and 3)		No	No	< 30 minutes / day	Moderate	Week 12	02	Entered	65	Male	04DEC15	112	Placebo	>=250 mg/day	No	No	>=250 mg/day	No	Yes	Yes	Yes	Yes
		work			0	1	02_005	Visit 4	Yes	12	83	25FEB16	0 (not at all) (if 0, skip questions 2 and 3)		No	No	< 30 minutes / day	Moderate	Week 12	02	Entered	65	Male	04DEC15	112	Placebo	>=250 mg/day	No	No	>=250 mg/day	No	Yes	Yes	Yes	Yes
		Work/walk		Grilled salmon	Gravy biscuit	1	02_005	Visit 5	Yes	13	84	26FEB16	2 times	More than 7 ounces or more than 1 fillet or more than 14 pieces of sushi	No	No	< 30 minutes / day	Moderate	Week 24	02	Entered	65	Male	04DEC15	112	Placebo	>=250 mg/day	No	No	>=250 mg/day	No	Yes	Yes	Yes	Yes
		Work/walk		Grilled salmon	Gravy biscuit	1	02_005	Visit 5	Yes	13	85	27FEB16	2 times	More than 7 ounces or more than 1 fillet or more than 14 pieces of sushi	No	No	< 30 minutes / day	Moderate	Week 24	02	Entered	65	Male	04DEC15	112	Placebo	>=250 mg/day	No	No	>=250 mg/day	No	Yes	Yes	Yes	Yes
		Work/walk		Grilled salmon	Gravy biscuit	1	02_005	Visit 5	Yes	13	86	28FEB16	2 times	More than 7 ounces or more than 1 fillet or more than 14 pieces of sushi	No	No	< 30 minutes / day	Moderate	Week 24	02	Entered	65	Male	04DEC15	112	Placebo	>=250 mg/day	No	No	>=250 mg/day	No	Yes	Yes	Yes	Yes
		Work/walk		Grilled salmon	Gravy biscuit	1	02_005	Visit 5	Yes	13	87	29FEB16	2 times	More than 7 ounces or more than 1 fillet or more than 14 pieces of sushi	No	No	< 30 minutes / day	Moderate	Week 24	02	Entered	65	Male	04DEC15	112	Placebo	>=250 mg/day	No	No	>=250 mg/day	No	Yes	Yes	Yes	Yes
		Work/walk		Grilled salmon	Gravy biscuit	1	02_005	Visit 5	Yes	13	88	01MAR16	2 times	More than 7 ounces or more than 1 fillet or more than 14 pieces of sushi	No	No	< 30 minutes / day	Moderate	Week 24	02	Entered	65	Male	04DEC15	112	Placebo	>=250 mg/day	No	No	>=250 mg/day	No	Yes	Yes	Yes	Yes
		Work/walk		Grilled salmon	Gravy biscuit	1	02_005	Visit 5	Yes	13	89	02MAR16	2 times	More than 7 ounces or more than 1 fillet or more than 14 pieces of sushi	No	No	< 30 minutes / day	Moderate	Week 24	02	Entered	65	Male	04DEC15	112	Placebo	>=250 mg/day	No	No	>=250 mg/day	No	Yes	Yes	Yes	Yes
		Work/walk		Grilled salmon	Gravy biscuit	1	02_005	Visit 5	Yes	13	90	03MAR16	2 times	More than 7 ounces or more than 1 fillet or more than 14 pieces of sushi	No	No	< 30 minutes / day	Moderate	Week 24	02	Entered	65	Male	04DEC15	112	Placebo	>=250 mg/day	No	No	>=250 mg/day	No	Yes	Yes	Yes	Yes
		work		Tuna	0	0	02_005	Visit 5	Yes	14	91	04MAR16	1 time	2 to 7 ounces or about 1 fillet or 4-14 pieces of sushi	No	No	< 30 minutes / day	Moderate	Week 24	02	Entered	65	Male	04DEC15	112	Placebo	>=250 mg/day	No	No	>=250 mg/day	No	Yes	Yes	Yes	Yes
		work		Tuna	0	0	02_005	Visit 5	Yes	14	92	05MAR16	1 time	2 to 7 ounces or about 1 fillet or 4-14 pieces of sushi	No	No	< 30 minutes / day	Moderate	Week 24	02	Entered	65	Male	04DEC15	112	Placebo	>=250 mg/day	No	No	>=250 mg/day	No	Yes	Yes	Yes	Yes
		work		Tuna	0	0	02_005	Visit 5	Yes	14	93	06MAR16	1 time	2 to 7 ounces or about 1 fillet or 4-14 pieces of sushi	No	No	< 30 minutes / day	Moderate	Week 24	02	Entered	65	Male	04DEC15	112	Placebo	>=250 mg/day	No	No	>=250 mg/day	No	Yes	Yes	Yes	Yes
		work		Tuna	0	0	02_005	Visit 5	Yes	14	94	07MAR16	1 time	2 to 7 ounces or about 1 fillet or 4-14 pieces of sushi	No	No	< 30 minutes / day	Moderate	Week 24	02	Entered	65	Male	04DEC15	112	Placebo	>=250 mg/day	No	No	>=250 mg/day	No	Yes	Yes	Yes	Yes
		work		Tuna	0	0	02_005	Visit 5	Yes	14	95	08MAR16	1 time	2 to 7 ounces or about 1 fillet or 4-14 pieces of sushi	No	No	< 30 minutes / day	Moderate	Week 24	02	Entered	65	Male	04DEC15	112	Placebo	>=250 mg/day	No	No	>=250 mg/day	No	Yes	Yes	Yes	Yes
		work		Tuna	0	0	02_005	Visit 5	Yes	14	96	09MAR16	1 time	2 to 7 ounces or about 1 fillet or 4-14 pieces of sushi	No	No	< 30 minutes / day	Moderate	Week 24	02	Entered	65	Male	04DEC15	112	Placebo	>=250 mg/day	No	No	>=250 mg/day	No	Yes	Yes	Yes	Yes
		work		Tuna	0	0	02_005	Visit 5	Yes	14	97	10MAR16	1 time	2 to 7 ounces or about 1 fillet or 4-14 pieces of sushi	No	No	< 30 minutes / day	Moderate	Week 24	02	Entered	65	Male	04DEC15	112	Placebo	>=250 mg/day	No	No	>=250 mg/day	No	Yes	Yes	Yes	Yes
		Work		Salmon	1	1	02_005	Visit 5	Yes	15	98	11MAR16	1 time	2 to 7 ounces or about 1 fillet or 4-14 pieces of sushi	No	No	< 30 minutes / day	Light	Week 24	02	Entered	65	Male	04DEC15	112	Placebo	>=250 mg/day	No	No	>=250 mg/day	No	Yes	Yes	Yes	Yes
		Work		Salmon	1	1	02_005	Visit 5	Yes	15	99	12MAR16	1 time	2 to 7 ounces or about 1 fillet or 4-14 pieces of sushi	No	No	< 30 minutes / day	Light	Week 24	02	Entered	65	Male	04DEC15	112	Placebo	>=250 mg/day	No	No	>=250 mg/day	No	Yes	Yes	Yes	Yes
		Work		Salmon	1	1	02_005	Visit 5	Yes	15	100	13MAR16	1 time	2 to 7 ounces or about 1 fillet or 4-14 pieces of sushi	No	No	< 30 minutes / day	Light	Week 24	02	Entered	65	Male	04DEC15	112	Placebo	>=250 mg/day	No	No	>=250 mg/day	No	Yes	Yes	Yes	Yes
		Work		Salmon	1	1	02_005	Visit 5	Yes	15	101	14MAR16	1 time	2 to 7 ounces or about 1 fillet or 4-14 pieces of sushi	No	No	< 30 minutes / day	Light	Week 24	02	Entered	65	Male	04DEC15	112	Placebo	>=250 mg/day	No	No	>=250 mg/day	No	Yes	Yes	Yes	Yes
		Work		Salmon	1	1	02_005	Visit 5	Yes	15	102	15MAR16	1 time	2 to 7 ounces or about 1 fillet or 4-14 pieces of sushi	No	No	< 30 minutes / day	Light	Week 24	02	Entered	65	Male	04DEC15	112	Placebo	>=250 mg/day	No	No	>=250 mg/day	No	Yes	Yes	Yes	Yes
		Work		Salmon	1	1	02_005	Visit 5	Yes	15	103	16MAR16	1 time	2 to 7 ounces or about 1 fillet or 4-14 pieces of sushi	No	No	< 30 minutes / day	Light	Week 24	02	Entered	65	Male	04DEC15	112	Placebo	>=250 mg/day	No	No	>=250 mg/day	No	Yes	Yes	Yes	Yes
		Work		Salmon	1	1	02_005	Visit 5	Yes	15	104	17MAR16	1 time	2 to 7 ounces or about 1 fillet or 4-14 pieces of sushi	No	No	< 30 minutes / day	Light	Week 24	02	Entered	65	Male	04DEC15	112	Placebo	>=250 mg/day	No	No	>=250 mg/day	No	Yes	Yes	Yes	Yes
		Work		Salmon	none	once	02_005	Visit 5	Yes	16	105	18MAR16	2 times	More than 7 ounces or more than 1 fillet or more than 14 pieces of sushi	No	No	< 30 minutes / day	Moderate	Week 24	02	Entered	65	Male	04DEC15	112	Placebo	>=250 mg/day	No	No	>=250 mg/day	No	Yes	Yes	Yes	Yes
		Work		Salmon	none	once	02_005	Visit 5	Yes	16	106	19MAR16	2 times	More than 7 ounces or more than 1 fillet or more than 14 pieces of sushi	No	No	< 30 minutes / day	Moderate	Week 24	02	Entered	65	Male	04DEC15	112	Placebo	>=250 mg/day	No	No	>=250 mg/day	No	Yes	Yes	Yes	Yes
		Work		Salmon	none	once	02_005	Visit 5	Yes	16	107	20MAR16	2 times	More than 7 ounces or more than 1 fillet or more than 14 pieces of sushi	No	No	< 30 minutes / day	Moderate	Week 24	02	Entered	65	Male	04DEC15	112	Placebo	>=250 mg/day	No	No	>=250 mg/day	No	Yes	Yes	Yes	Yes
		Work		Salmon	none	once	02_005	Visit 5	Yes	16	108	21MAR16	2 times	More than 7 ounces or more than 1 fillet or more than 14 pieces of sushi	No	No	< 30 minutes / day	Moderate	Week 24	02	Entered	65	Male	04DEC15	112	Placebo	>=250 mg/day	No	No	>=250 mg/day	No	Yes	Yes	Yes	Yes
		Work		Salmon	none	once	02_005	Visit 5	Yes	16	109	22MAR16	2 times	More than 7 ounces or more than 1 fillet or more than 14 pieces of sushi	No	No	< 30 minutes / day	Moderate	Week 24	02	Entered	65	Male	04DEC15	112	Placebo	>=250 mg/day	No	No	>=250 mg/day	No	Yes	Yes	Yes	Yes
		Work		Salmon	none	once	02_005	Visit 5	Yes	16	110	23MAR16	2 times	More than 7 ounces or more than 1 fillet or more than 14 pieces of sushi	No	No	< 30 minutes / day	Moderate	Week 24	02	Entered	65	Male	04DEC15	112	Placebo	>=250 mg/day	No	No	>=250 mg/day	No	Yes	Yes	Yes	Yes
		Work		Salmon	none	once	02_005	Visit 5	Yes	16	111	24MAR16	2 times	More than 7 ounces or more than 1 fillet or more than 14 pieces of sushi	No	No	< 30 minutes / day	Moderate	Week 24	02	Entered	65	Male	04DEC15	112	Placebo	>=250 mg/day	No	No	>=250 mg/day	No	Yes	Yes	Yes	Yes
		Walk/work		Salmon	1	1	02_005	Visit 5	Yes	17	112	25MAR16	2 times	More than 7 ounces or more than 1 fillet or more than 14 pieces of sushi	No	No	< 30 minutes / day	Moderate	Week 24	02	Entered	65	Male	04DEC15	112	Placebo	>=250 mg/day	No	No	>=250 mg/day	No	Yes	Yes	Yes	Yes
		Walk/work		Salmon	1	1	02_005	Visit 5	Yes	17	113	26MAR16	2 times	More than 7 ounces or more than 1 fillet or more than 14 pieces of sushi	No	No	< 30 minutes / day	Moderate	Week 24	02	Entered	65	Male	04DEC15	112	Placebo	>=250 mg/day	No	No	>=250 mg/day	No	Yes	Yes	Yes	Yes
		Walk/work		Salmon	1	1	02_005	Visit 5	Yes	17	114	27MAR16	2 times	More than 7 ounces or more than 1 fillet or more than 14 pieces of sushi	No	No	< 30 minutes / day	Moderate	Week 24	02	Entered	65	Male	04DEC15	112	Placebo	>=250 mg/day	No	No	>=250 mg/day	No	Yes	Yes	Yes	Yes
		Walk/work		Salmon	1	1	02_005	Visit 5	Yes	17	115	28MAR16	2 times	More than 7 ounces or more than 1 fillet or more than 14 pieces of sushi	No	No	< 30 minutes / day	Moderate	Week 24	02	Entered	65	Male	04DEC15	112	Placebo	>=250 mg/day	No	No	>=250 mg/day	No	Yes	Yes	Yes	Yes
		Walk/work		Salmon	1	1	02_005	Visit 5	Yes	17	116	29MAR16	2 times	More than 7 ounces or more than 1 fillet or more than 14 pieces of sushi	No	No	< 30 minutes / day	Moderate	Week 24	02	Entered	65	Male	04DEC15	112	Placebo	>=250 mg/day	No	No	>=250 mg/day	No	Yes	Yes	Yes	Yes
		Walk/work		Salmon	1	1	02_005	Visit 5	Yes	17	117	30MAR16	2 times	More than 7 ounces or more than 1 fillet or more than 14 pieces of sushi	No	No	< 30 minutes / day	Moderate	Week 24	02	Entered	65	Male	04DEC15	112	Placebo	>=250 mg/day	No	No	>=250 mg/day	No	Yes	Yes	Yes	Yes
		Walk/work		Salmon	1	1	02_005	Visit 5	Yes	17	118	31MAR16	2 times	More than 7 ounces or more than 1 fillet or more than 14 pieces of sushi	No	No	< 30 minutes / day	Moderate	Week 24	02	Entered	65	Male	04DEC15	112	Placebo	>=250 mg/day	No	No	>=250 mg/day	No	Yes	Yes	Yes	Yes
		walk		tuna	gravy buiscut	1	02_005	Visit 5	Yes	18	119	01APR16	1 time	Less than 2 ounces or less than one fillet or less than 4 pieces of sushi	No	No	< 30 minutes / day	Moderate	Week 24	02	Entered	65	Male	04DEC15	112	Placebo	>=250 mg/day	No	No	>=250 mg/day	No	Yes	Yes	Yes	Yes
		walk		tuna	gravy buiscut	1	02_005	Visit 5	Yes	18	120	02APR16	1 time	Less than 2 ounces or less than one fillet or less than 4 pieces of sushi	No	No	< 30 minutes / day	Moderate	Week 24	02	Entered	65	Male	04DEC15	112	Placebo	>=250 mg/day	No	No	>=250 mg/day	No	Yes	Yes	Yes	Yes
		walk		tuna	gravy buiscut	1	02_005	Visit 5	Yes	18	121	03APR16	1 time	Less than 2 ounces or less than one fillet or less than 4 pieces of sushi	No	No	< 30 minutes / day	Moderate	Week 24	02	Entered	65	Male	04DEC15	112	Placebo	>=250 mg/day	No	No	>=250 mg/day	No	Yes	Yes	Yes	Yes
		walk		tuna	gravy buiscut	1	02_005	Visit 5	Yes	18	122	04APR16	1 time	Less than 2 ounces or less than one fillet or less than 4 pieces of sushi	No	No	< 30 minutes / day	Moderate	Week 24	02	Entered	65	Male	04DEC15	112	Placebo	>=250 mg/day	No	No	>=250 mg/day	No	Yes	Yes	Yes	Yes
		walk		tuna	gravy buiscut	1	02_005	Visit 5	Yes	18	123	05APR16	1 time	Less than 2 ounces or less than one fillet or less than 4 pieces of sushi	No	No	< 30 minutes / day	Moderate	Week 24	02	Entered	65	Male	04DEC15	112	Placebo	>=250 mg/day	No	No	>=250 mg/day	No	Yes	Yes	Yes	Yes
		walk		tuna	gravy buiscut	1	02_005	Visit 5	Yes	18	124	06APR16	1 time	Less than 2 ounces or less than one fillet or less than 4 pieces of sushi	No	No	< 30 minutes / day	Moderate	Week 24	02	Entered	65	Male	04DEC15	112	Placebo	>=250 mg/day	No	No	>=250 mg/day	No	Yes	Yes	Yes	Yes
		walk		tuna	gravy buiscut	1	02_005	Visit 5	Yes	18	125	07APR16	1 time	Less than 2 ounces or less than one fillet or less than 4 pieces of sushi	No	No	< 30 minutes / day	Moderate	Week 24	02	Entered	65	Male	04DEC15	112	Placebo	>=250 mg/day	No	No	>=250 mg/day	No	Yes	Yes	Yes	Yes
		Work		Tuna, Salmon	1	0	02_005	Visit 5	Yes	19	126	08APR16	2 times	More than 7 ounces or more than 1 fillet or more than 14 pieces of sushi	No	No	< 30 minutes / day	Moderate	Week 24	02	Entered	65	Male	04DEC15	112	Placebo	>=250 mg/day	No	No	>=250 mg/day	No	Yes	Yes	Yes	Yes
		Work		Tuna, Salmon	1	0	02_005	Visit 5	Yes	19	127	09APR16	2 times	More than 7 ounces or more than 1 fillet or more than 14 pieces of sushi	No	No	< 30 minutes / day	Moderate	Week 24	02	Entered	65	Male	04DEC15	112	Placebo	>=250 mg/day	No	No	>=250 mg/day	No	Yes	Yes	Yes	Yes
		Work		Tuna, Salmon	1	0	02_005	Visit 5	Yes	19	128	10APR16	2 times	More than 7 ounces or more than 1 fillet or more than 14 pieces of sushi	No	No	< 30 minutes / day	Moderate	Week 24	02	Entered	65	Male	04DEC15	112	Placebo	>=250 mg/day	No	No	>=250 mg/day	No	Yes	Yes	Yes	Yes
		Work		Tuna, Salmon	1	0	02_005	Visit 5	Yes	19	129	11APR16	2 times	More than 7 ounces or more than 1 fillet or more than 14 pieces of sushi	No	No	< 30 minutes / day	Moderate	Week 24	02	Entered	65	Male	04DEC15	112	Placebo	>=250 mg/day	No	No	>=250 mg/day	No	Yes	Yes	Yes	Yes
		Work		Tuna, Salmon	1	0	02_005	Visit 5	Yes	19	130	12APR16	2 times	More than 7 ounces or more than 1 fillet or more than 14 pieces of sushi	No	No	< 30 minutes / day	Moderate	Week 24	02	Entered	65	Male	04DEC15	112	Placebo	>=250 mg/day	No	No	>=250 mg/day	No	Yes	Yes	Yes	Yes
		Work		Tuna, Salmon	1	0	02_005	Visit 5	Yes	19	131	13APR16	2 times	More than 7 ounces or more than 1 fillet or more than 14 pieces of sushi	No	No	< 30 minutes / day	Moderate	Week 24	02	Entered	65	Male	04DEC15	112	Placebo	>=250 mg/day	No	No	>=250 mg/day	No	Yes	Yes	Yes	Yes
		Work		Tuna, Salmon	1	0	02_005	Visit 5	Yes	19	132	14APR16	2 times	More than 7 ounces or more than 1 fillet or more than 14 pieces of sushi	No	No	< 30 minutes / day	Moderate	Week 24	02	Entered	65	Male	04DEC15	112	Placebo	>=250 mg/day	No	No	>=250 mg/day	No	Yes	Yes	Yes	Yes
		work			0	0	02_005	Visit 5	Yes	20	133	15APR16	0 (not at all) (if 0, skip questions 2 and 3)		No	No	< 30 minutes / day	Moderate	Week 24	02	Entered	65	Male	04DEC15	112	Placebo	>=250 mg/day	No	No	>=250 mg/day	No	Yes	Yes	Yes	Yes
		work			0	0	02_005	Visit 5	Yes	20	134	16APR16	0 (not at all) (if 0, skip questions 2 and 3)		No	No	< 30 minutes / day	Moderate	Week 24	02	Entered	65	Male	04DEC15	112	Placebo	>=250 mg/day	No	No	>=250 mg/day	No	Yes	Yes	Yes	Yes
		work			0	0	02_005	Visit 5	Yes	20	135	17APR16	0 (not at all) (if 0, skip questions 2 and 3)		No	No	< 30 minutes / day	Moderate	Week 24	02	Entered	65	Male	04DEC15	112	Placebo	>=250 mg/day	No	No	>=250 mg/day	No	Yes	Yes	Yes	Yes
		work			0	0	02_005	Visit 5	Yes	20	136	18APR16	0 (not at all) (if 0, skip questions 2 and 3)		No	No	< 30 minutes / day	Moderate	Week 24	02	Entered	65	Male	04DEC15	112	Placebo	>=250 mg/day	No	No	>=250 mg/day	No	Yes	Yes	Yes	Yes
		work			0	0	02_005	Visit 5	Yes	20	137	19APR16	0 (not at all) (if 0, skip questions 2 and 3)		No	No	< 30 minutes / day	Moderate	Week 24	02	Entered	65	Male	04DEC15	112	Placebo	>=250 mg/day	No	No	>=250 mg/day	No	Yes	Yes	Yes	Yes
		work			0	0	02_005	Visit 5	Yes	20	138	20APR16	0 (not at all) (if 0, skip questions 2 and 3)		No	No	< 30 minutes / day	Moderate	Week 24	02	Entered	65	Male	04DEC15	112	Placebo	>=250 mg/day	No	No	>=250 mg/day	No	Yes	Yes	Yes	Yes
		work			0	0	02_005	Visit 5	Yes	20	139	21APR16	0 (not at all) (if 0, skip questions 2 and 3)		No	No	< 30 minutes / day	Moderate	Week 24	02	Entered	65	Male	04DEC15	112	Placebo	>=250 mg/day	No	No	>=250 mg/day	No	Yes	Yes	Yes	Yes
		walking		Grilled salmon	0	0	02_005	Visit 5	Yes	21	140	22APR16	2 times	More than 7 ounces or more than 1 fillet or more than 14 pieces of sushi	No	No	< 30 minutes / day	Moderate	Week 24	02	Entered	65	Male	04DEC15	112	Placebo	>=250 mg/day	No	No	>=250 mg/day	No	Yes	Yes	Yes	Yes
		walking		Grilled salmon	0	0	02_005	Visit 5	Yes	21	141	23APR16	2 times	More than 7 ounces or more than 1 fillet or more than 14 pieces of sushi	No	No	< 30 minutes / day	Moderate	Week 24	02	Entered	65	Male	04DEC15	112	Placebo	>=250 mg/day	No	No	>=250 mg/day	No	Yes	Yes	Yes	Yes
		walking		Grilled salmon	0	0	02_005	Visit 5	Yes	21	142	24APR16	2 times	More than 7 ounces or more than 1 fillet or more than 14 pieces of sushi	No	No	< 30 minutes / day	Moderate	Week 24	02	Entered	65	Male	04DEC15	112	Placebo	>=250 mg/day	No	No	>=250 mg/day	No	Yes	Yes	Yes	Yes
		walking		Grilled salmon	0	0	02_005	Visit 5	Yes	21	143	25APR16	2 times	More than 7 ounces or more than 1 fillet or more than 14 pieces of sushi	No	No	< 30 minutes / day	Moderate	Week 24	02	Entered	65	Male	04DEC15	112	Placebo	>=250 mg/day	No	No	>=250 mg/day	No	Yes	Yes	Yes	Yes
		walking		Grilled salmon	0	0	02_005	Visit 5	Yes	21	144	26APR16	2 times	More than 7 ounces or more than 1 fillet or more than 14 pieces of sushi	No	No	< 30 minutes / day	Moderate	Week 24	02	Entered	65	Male	04DEC15	112	Placebo	>=250 mg/day	No	No	>=250 mg/day	No	Yes	Yes	Yes	Yes
		walking		Grilled salmon	0	0	02_005	Visit 5	Yes	21	145	27APR16	2 times	More than 7 ounces or more than 1 fillet or more than 14 pieces of sushi	No	No	< 30 minutes / day	Moderate	Week 24	02	Entered	65	Male	04DEC15	112	Placebo	>=250 mg/day	No	No	>=250 mg/day	No	Yes	Yes	Yes	Yes
		walking		Grilled salmon	0	0	02_005	Visit 5	Yes	21	146	28APR16	2 times	More than 7 ounces or more than 1 fillet or more than 14 pieces of sushi	No	No	< 30 minutes / day	Moderate	Week 24	02	Entered	65	Male	04DEC15	112	Placebo	>=250 mg/day	No	No	>=250 mg/day	No	Yes	Yes	Yes	Yes
		Work		tuna	twice	nuts once	02_005	Visit 5	Yes	22	147	29APR16	1 time	Less than 2 ounces or less than one fillet or less than 4 pieces of sushi	No	No	< 30 minutes / day	Moderate	Week 24	02	Entered	65	Male	04DEC15	112	Placebo	>=250 mg/day	No	No	>=250 mg/day	No	Yes	Yes	Yes	Yes
		Work		tuna	twice	nuts once	02_005	Visit 5	Yes	22	148	30APR16	1 time	Less than 2 ounces or less than one fillet or less than 4 pieces of sushi	No	No	< 30 minutes / day	Moderate	Week 24	02	Entered	65	Male	04DEC15	112	Placebo	>=250 mg/day	No	No	>=250 mg/day	No	Yes	Yes	Yes	Yes
		Work		tuna	twice	nuts once	02_005	Visit 5	Yes	22	149	01MAY16	1 time	Less than 2 ounces or less than one fillet or less than 4 pieces of sushi	No	No	< 30 minutes / day	Moderate	Week 24	02	Entered	65	Male	04DEC15	112	Placebo	>=250 mg/day	No	No	>=250 mg/day	No	Yes	Yes	Yes	Yes
		Work		tuna	twice	nuts once	02_005	Visit 5	Yes	22	150	02MAY16	1 time	Less than 2 ounces or less than one fillet or less than 4 pieces of sushi	No	No	< 30 minutes / day	Moderate	Week 24	02	Entered	65	Male	04DEC15	112	Placebo	>=250 mg/day	No	No	>=250 mg/day	No	Yes	Yes	Yes	Yes
		Work		tuna	twice	nuts once	02_005	Visit 5	Yes	22	151	03MAY16	1 time	Less than 2 ounces or less than one fillet or less than 4 pieces of sushi	No	No	< 30 minutes / day	Moderate	Week 24	02	Entered	65	Male	04DEC15	112	Placebo	>=250 mg/day	No	No	>=250 mg/day	No	Yes	Yes	Yes	Yes
		Work		tuna	twice	nuts once	02_005	Visit 5	Yes	22	152	04MAY16	1 time	Less than 2 ounces or less than one fillet or less than 4 pieces of sushi	No	No	< 30 minutes / day	Moderate	Week 24	02	Entered	65	Male	04DEC15	112	Placebo	>=250 mg/day	No	No	>=250 mg/day	No	Yes	Yes	Yes	Yes
		Work		tuna	twice	nuts once	02_005	Visit 5	Yes	22	153	05MAY16	1 time	Less than 2 ounces or less than one fillet or less than 4 pieces of sushi	No	No	< 30 minutes / day	Moderate	Week 24	02	Entered	65	Male	04DEC15	112	Placebo	>=250 mg/day	No	No	>=250 mg/day	No	Yes	Yes	Yes	Yes
		work		tuna	0	0	02_005	Visit 5	Yes	23	154	06MAY16	1 time	Less than 2 ounces or less than one fillet or less than 4 pieces of sushi	No	No	< 30 minutes / day	Moderate	Week 24	02	Entered	65	Male	04DEC15	112	Placebo	>=250 mg/day	No	No	>=250 mg/day	No	Yes	Yes	Yes	Yes
		work		tuna	0	0	02_005	Visit 5	Yes	23	155	07MAY16	1 time	Less than 2 ounces or less than one fillet or less than 4 pieces of sushi	No	No	< 30 minutes / day	Moderate	Week 24	02	Entered	65	Male	04DEC15	112	Placebo	>=250 mg/day	No	No	>=250 mg/day	No	Yes	Yes	Yes	Yes
		work		tuna	0	0	02_005	Visit 5	Yes	23	156	08MAY16	1 time	Less than 2 ounces or less than one fillet or less than 4 pieces of sushi	No	No	< 30 minutes / day	Moderate	Week 24	02	Entered	65	Male	04DEC15	112	Placebo	>=250 mg/day	No	No	>=250 mg/day	No	Yes	Yes	Yes	Yes
		work		tuna	0	0	02_005	Visit 5	Yes	23	157	09MAY16	1 time	Less than 2 ounces or less than one fillet or less than 4 pieces of sushi	No	No	< 30 minutes / day	Moderate	Week 24	02	Entered	65	Male	04DEC15	112	Placebo	>=250 mg/day	No	No	>=250 mg/day	No	Yes	Yes	Yes	Yes
		work		tuna	0	0	02_005	Visit 5	Yes	23	158	10MAY16	1 time	Less than 2 ounces or less than one fillet or less than 4 pieces of sushi	No	No	< 30 minutes / day	Moderate	Week 24	02	Entered	65	Male	04DEC15	112	Placebo	>=250 mg/day	No	No	>=250 mg/day	No	Yes	Yes	Yes	Yes
		work		tuna	0	0	02_005	Visit 5	Yes	23	159	11MAY16	1 time	Less than 2 ounces or less than one fillet or less than 4 pieces of sushi	No	No	< 30 minutes / day	Moderate	Week 24	02	Entered	65	Male	04DEC15	112	Placebo	>=250 mg/day	No	No	>=250 mg/day	No	Yes	Yes	Yes	Yes
		work		tuna	0	0	02_005	Visit 5	Yes	23	160	12MAY16	1 time	Less than 2 ounces or less than one fillet or less than 4 pieces of sushi	No	No	< 30 minutes / day	Moderate	Week 24	02	Entered	65	Male	04DEC15	112	Placebo	>=250 mg/day	No	No	>=250 mg/day	No	Yes	Yes	Yes	Yes
		walk		Grilled salmon	1	0	02_005	Visit 5	Yes	24	161	13MAY16	2 times	More than 7 ounces or more than 1 fillet or more than 14 pieces of sushi	No	No	< 30 minutes / day	Moderate	Week 24	02	Entered	65	Male	04DEC15	112	Placebo	>=250 mg/day	No	No	>=250 mg/day	No	Yes	Yes	Yes	Yes
		walk		Grilled salmon	1	0	02_005	Visit 5	Yes	24	162	14MAY16	2 times	More than 7 ounces or more than 1 fillet or more than 14 pieces of sushi	No	No	< 30 minutes / day	Moderate	Week 24	02	Entered	65	Male	04DEC15	112	Placebo	>=250 mg/day	No	No	>=250 mg/day	No	Yes	Yes	Yes	Yes
		walk		Grilled salmon	1	0	02_005	Visit 5	Yes	24	163	15MAY16	2 times	More than 7 ounces or more than 1 fillet or more than 14 pieces of sushi	No	No	< 30 minutes / day	Moderate	Week 24	02	Entered	65	Male	04DEC15	112	Placebo	>=250 mg/day	No	No	>=250 mg/day	No	Yes	Yes	Yes	Yes
		walk		Grilled salmon	1	0	02_005	Visit 5	Yes	24	164	16MAY16	2 times	More than 7 ounces or more than 1 fillet or more than 14 pieces of sushi	No	No	< 30 minutes / day	Moderate	Week 24	02	Entered	65	Male	04DEC15	112	Placebo	>=250 mg/day	No	No	>=250 mg/day	No	Yes	Yes	Yes	Yes
		walk		Grilled salmon	1	0	02_005	Visit 5	Yes	24	165	17MAY16	2 times	More than 7 ounces or more than 1 fillet or more than 14 pieces of sushi	No	No	< 30 minutes / day	Moderate	Week 24	02	Entered	65	Male	04DEC15	112	Placebo	>=250 mg/day	No	No	>=250 mg/day	No	Yes	Yes	Yes	Yes
		walk		Grilled salmon	1	0	02_005	Visit 5	Yes	24	166	18MAY16	2 times	More than 7 ounces or more than 1 fillet or more than 14 pieces of sushi	No	No	< 30 minutes / day	Moderate	Week 24	02	Entered	65	Male	04DEC15	112	Placebo	>=250 mg/day	No	No	>=250 mg/day	No	Yes	Yes	Yes	Yes
		walk		Grilled salmon	1	0	02_005	Visit 5	Yes	24	167	19MAY16	2 times	More than 7 ounces or more than 1 fillet or more than 14 pieces of sushi	No	No	< 30 minutes / day	Moderate	Week 24	02	Entered	65	Male	04DEC15	112	Placebo	>=250 mg/day	No	No	>=250 mg/day	No	Yes	Yes	Yes	Yes
		walk		shrimp	1	0	03_002	Visit 3	Yes	1	0	31OCT15	1 time	2 to 7 ounces or about 1 fillet or 4-14 pieces of sushi	No	No	< 30 minutes / day	Light	Week 6	03	Early Termination	52	Female	30OCT15	116	Placebo	<250 mg/day	No	No	<250 mg/day	No	Yes	Yes	Yes	Yes
		walk		shrimp	1	0	03_002	Visit 3	Yes	1	1	01NOV15	1 time	2 to 7 ounces or about 1 fillet or 4-14 pieces of sushi	No	No	< 30 minutes / day	Light	Week 6	03	Early Termination	52	Female	30OCT15	116	Placebo	<250 mg/day	No	No	<250 mg/day	No	Yes	Yes	Yes	Yes
		walk		shrimp	1	0	03_002	Visit 3	Yes	1	2	02NOV15	1 time	2 to 7 ounces or about 1 fillet or 4-14 pieces of sushi	No	No	< 30 minutes / day	Light	Week 6	03	Early Termination	52	Female	30OCT15	116	Placebo	<250 mg/day	No	No	<250 mg/day	No	Yes	Yes	Yes	Yes
		walk		shrimp	1	0	03_002	Visit 3	Yes	1	3	03NOV15	1 time	2 to 7 ounces or about 1 fillet or 4-14 pieces of sushi	No	No	< 30 minutes / day	Light	Week 6	03	Early Termination	52	Female	30OCT15	116	Placebo	<250 mg/day	No	No	<250 mg/day	No	Yes	Yes	Yes	Yes
		walk		shrimp	1	0	03_002	Visit 3	Yes	1	4	04NOV15	1 time	2 to 7 ounces or about 1 fillet or 4-14 pieces of sushi	No	No	< 30 minutes / day	Light	Week 6	03	Early Termination	52	Female	30OCT15	116	Placebo	<250 mg/day	No	No	<250 mg/day	No	Yes	Yes	Yes	Yes
		walk		shrimp	1	0	03_002	Visit 3	Yes	1	5	05NOV15	1 time	2 to 7 ounces or about 1 fillet or 4-14 pieces of sushi	No	No	< 30 minutes / day	Light	Week 6	03	Early Termination	52	Female	30OCT15	116	Placebo	<250 mg/day	No	No	<250 mg/day	No	Yes	Yes	Yes	Yes
		walk		shrimp	1	0	03_002	Visit 3	Yes	1	6	06NOV15	1 time	2 to 7 ounces or about 1 fillet or 4-14 pieces of sushi	No	No	< 30 minutes / day	Light	Week 6	03	Early Termination	52	Female	30OCT15	116	Placebo	<250 mg/day	No	No	<250 mg/day	No	Yes	Yes	Yes	Yes
Trying to reduce food products with frutose corn syrup	Vit c and emergenc	Walking			Three times	None	03_002	Visit 3	Yes	2	7	07NOV15	0 (not at all) (if 0, skip questions 2 and 3)		Yes	Yes	< 30 minutes / day	Moderate	Week 6	03	Early Termination	52	Female	30OCT15	116	Placebo	<250 mg/day	No	No	<250 mg/day	No	Yes	Yes	Yes	Yes
Trying to reduce food products with frutose corn syrup	Vit c and emergenc	Walking			Three times	None	03_002	Visit 3	Yes	2	8	08NOV15	0 (not at all) (if 0, skip questions 2 and 3)		Yes	Yes	< 30 minutes / day	Moderate	Week 6	03	Early Termination	52	Female	30OCT15	116	Placebo	<250 mg/day	No	No	<250 mg/day	No	Yes	Yes	Yes	Yes
Trying to reduce food products with frutose corn syrup	Vit c and emergenc	Walking			Three times	None	03_002	Visit 3	Yes	2	9	09NOV15	0 (not at all) (if 0, skip questions 2 and 3)		Yes	Yes	< 30 minutes / day	Moderate	Week 6	03	Early Termination	52	Female	30OCT15	116	Placebo	<250 mg/day	No	No	<250 mg/day	No	Yes	Yes	Yes	Yes
Trying to reduce food products with frutose corn syrup	Vit c and emergenc	Walking			Three times	None	03_002	Visit 3	Yes	2	10	10NOV15	0 (not at all) (if 0, skip questions 2 and 3)		Yes	Yes	< 30 minutes / day	Moderate	Week 6	03	Early Termination	52	Female	30OCT15	116	Placebo	<250 mg/day	No	No	<250 mg/day	No	Yes	Yes	Yes	Yes
Trying to reduce food products with frutose corn syrup	Vit c and emergenc	Walking			Three times	None	03_002	Visit 3	Yes	2	11	11NOV15	0 (not at all) (if 0, skip questions 2 and 3)		Yes	Yes	< 30 minutes / day	Moderate	Week 6	03	Early Termination	52	Female	30OCT15	116	Placebo	<250 mg/day	No	No	<250 mg/day	No	Yes	Yes	Yes	Yes
Trying to reduce food products with frutose corn syrup	Vit c and emergenc	Walking			Three times	None	03_002	Visit 3	Yes	2	12	12NOV15	0 (not at all) (if 0, skip questions 2 and 3)		Yes	Yes	< 30 minutes / day	Moderate	Week 6	03	Early Termination	52	Female	30OCT15	116	Placebo	<250 mg/day	No	No	<250 mg/day	No	Yes	Yes	Yes	Yes
Trying to reduce food products with frutose corn syrup	Vit c and emergenc	Walking			Three times	None	03_002	Visit 3	Yes	2	13	13NOV15	0 (not at all) (if 0, skip questions 2 and 3)		Yes	Yes	< 30 minutes / day	Moderate	Week 6	03	Early Termination	52	Female	30OCT15	116	Placebo	<250 mg/day	No	No	<250 mg/day	No	Yes	Yes	Yes	Yes
		Walking		1 shrimp 1 scallop 2 pieces of calamari	Twice	None	03_002	Visit 3	Yes	3	14	14NOV15	1 time	Less than 2 ounces or less than one fillet or less than 4 pieces of sushi	No	No	< 30 minutes / day	Moderate	Week 6	03	Early Termination	52	Female	30OCT15	116	Placebo	<250 mg/day	No	No	<250 mg/day	No	Yes	Yes	Yes	Yes
		Walking		1 shrimp 1 scallop 2 pieces of calamari	Twice	None	03_002	Visit 3	Yes	3	15	15NOV15	1 time	Less than 2 ounces or less than one fillet or less than 4 pieces of sushi	No	No	< 30 minutes / day	Moderate	Week 6	03	Early Termination	52	Female	30OCT15	116	Placebo	<250 mg/day	No	No	<250 mg/day	No	Yes	Yes	Yes	Yes
		Walking		1 shrimp 1 scallop 2 pieces of calamari	Twice	None	03_002	Visit 3	Yes	3	16	16NOV15	1 time	Less than 2 ounces or less than one fillet or less than 4 pieces of sushi	No	No	< 30 minutes / day	Moderate	Week 6	03	Early Termination	52	Female	30OCT15	116	Placebo	<250 mg/day	No	No	<250 mg/day	No	Yes	Yes	Yes	Yes
		Walking		1 shrimp 1 scallop 2 pieces of calamari	Twice	None	03_002	Visit 3	Yes	3	17	17NOV15	1 time	Less than 2 ounces or less than one fillet or less than 4 pieces of sushi	No	No	< 30 minutes / day	Moderate	Week 6	03	Early Termination	52	Female	30OCT15	116	Placebo	<250 mg/day	No	No	<250 mg/day	No	Yes	Yes	Yes	Yes
		Walking		1 shrimp 1 scallop 2 pieces of calamari	Twice	None	03_002	Visit 3	Yes	3	18	18NOV15	1 time	Less than 2 ounces or less than one fillet or less than 4 pieces of sushi	No	No	< 30 minutes / day	Moderate	Week 6	03	Early Termination	52	Female	30OCT15	116	Placebo	<250 mg/day	No	No	<250 mg/day	No	Yes	Yes	Yes	Yes
		Walking		1 shrimp 1 scallop 2 pieces of calamari	Twice	None	03_002	Visit 3	Yes	3	19	19NOV15	1 time	Less than 2 ounces or less than one fillet or less than 4 pieces of sushi	No	No	< 30 minutes / day	Moderate	Week 6	03	Early Termination	52	Female	30OCT15	116	Placebo	<250 mg/day	No	No	<250 mg/day	No	Yes	Yes	Yes	Yes
		Walking		1 shrimp 1 scallop 2 pieces of calamari	Twice	None	03_002	Visit 3	Yes	3	20	20NOV15	1 time	Less than 2 ounces or less than one fillet or less than 4 pieces of sushi	No	No	< 30 minutes / day	Moderate	Week 6	03	Early Termination	52	Female	30OCT15	116	Placebo	<250 mg/day	No	No	<250 mg/day	No	Yes	Yes	Yes	Yes
		Walking			Once	None	03_002	Visit 3	Yes	4	21	21NOV15	0 (not at all) (if 0, skip questions 2 and 3)		No	No	30 or more minutes / day	Moderate	Week 6	03	Early Termination	52	Female	30OCT15	116	Placebo	<250 mg/day	No	No	<250 mg/day	No	Yes	Yes	Yes	Yes
		Walking			Once	None	03_002	Visit 3	Yes	4	22	22NOV15	0 (not at all) (if 0, skip questions 2 and 3)		No	No	30 or more minutes / day	Moderate	Week 6	03	Early Termination	52	Female	30OCT15	116	Placebo	<250 mg/day	No	No	<250 mg/day	No	Yes	Yes	Yes	Yes
		Walking			Once	None	03_002	Visit 3	Yes	4	23	23NOV15	0 (not at all) (if 0, skip questions 2 and 3)		No	No	30 or more minutes / day	Moderate	Week 6	03	Early Termination	52	Female	30OCT15	116	Placebo	<250 mg/day	No	No	<250 mg/day	No	Yes	Yes	Yes	Yes
		Walking			Once	None	03_002	Visit 3	Yes	4	24	24NOV15	0 (not at all) (if 0, skip questions 2 and 3)		No	No	30 or more minutes / day	Moderate	Week 6	03	Early Termination	52	Female	30OCT15	116	Placebo	<250 mg/day	No	No	<250 mg/day	No	Yes	Yes	Yes	Yes
		Walking			Once	None	03_002	Visit 3	Yes	4	25	25NOV15	0 (not at all) (if 0, skip questions 2 and 3)		No	No	30 or more minutes / day	Moderate	Week 6	03	Early Termination	52	Female	30OCT15	116	Placebo	<250 mg/day	No	No	<250 mg/day	No	Yes	Yes	Yes	Yes
		Walking			Once	None	03_002	Visit 3	Yes	4	26	26NOV15	0 (not at all) (if 0, skip questions 2 and 3)		No	No	30 or more minutes / day	Moderate	Week 6	03	Early Termination	52	Female	30OCT15	116	Placebo	<250 mg/day	No	No	<250 mg/day	No	Yes	Yes	Yes	Yes
		Walking			Once	None	03_002	Visit 3	Yes	4	27	27NOV15	0 (not at all) (if 0, skip questions 2 and 3)		No	No	30 or more minutes / day	Moderate	Week 6	03	Early Termination	52	Female	30OCT15	116	Placebo	<250 mg/day	No	No	<250 mg/day	No	Yes	Yes	Yes	Yes
		Walking		Shrimp	Twice	Once	03_002	Visit 3	Yes	5	28	28NOV15	1 time	2 to 7 ounces or about 1 fillet or 4-14 pieces of sushi	No	No	< 30 minutes / day	Moderate	Week 6	03	Early Termination	52	Female	30OCT15	116	Placebo	<250 mg/day	No	No	<250 mg/day	No	Yes	Yes	Yes	Yes
		Walking		Shrimp	Twice	Once	03_002	Visit 3	Yes	5	29	29NOV15	1 time	2 to 7 ounces or about 1 fillet or 4-14 pieces of sushi	No	No	< 30 minutes / day	Moderate	Week 6	03	Early Termination	52	Female	30OCT15	116	Placebo	<250 mg/day	No	No	<250 mg/day	No	Yes	Yes	Yes	Yes
		Walking		Shrimp	Twice	Once	03_002	Visit 3	Yes	5	30	30NOV15	1 time	2 to 7 ounces or about 1 fillet or 4-14 pieces of sushi	No	No	< 30 minutes / day	Moderate	Week 6	03	Early Termination	52	Female	30OCT15	116	Placebo	<250 mg/day	No	No	<250 mg/day	No	Yes	Yes	Yes	Yes
		Walking		Shrimp	Twice	Once	03_002	Visit 3	Yes	5	31	01DEC15	1 time	2 to 7 ounces or about 1 fillet or 4-14 pieces of sushi	No	No	< 30 minutes / day	Moderate	Week 6	03	Early Termination	52	Female	30OCT15	116	Placebo	<250 mg/day	No	No	<250 mg/day	No	Yes	Yes	Yes	Yes
		Walking		Shrimp	Twice	Once	03_002	Visit 3	Yes	5	32	02DEC15	1 time	2 to 7 ounces or about 1 fillet or 4-14 pieces of sushi	No	No	< 30 minutes / day	Moderate	Week 6	03	Early Termination	52	Female	30OCT15	116	Placebo	<250 mg/day	No	No	<250 mg/day	No	Yes	Yes	Yes	Yes
		Walking		Shrimp	Twice	Once	03_002	Visit 3	Yes	5	33	03DEC15	1 time	2 to 7 ounces or about 1 fillet or 4-14 pieces of sushi	No	No	< 30 minutes / day	Moderate	Week 6	03	Early Termination	52	Female	30OCT15	116	Placebo	<250 mg/day	No	No	<250 mg/day	No	Yes	Yes	Yes	Yes
		Walking		Shrimp	Twice	Once	03_002	Visit 3	Yes	5	34	04DEC15	1 time	2 to 7 ounces or about 1 fillet or 4-14 pieces of sushi	No	No	< 30 minutes / day	Moderate	Week 6	03	Early Termination	52	Female	30OCT15	116	Placebo	<250 mg/day	No	No	<250 mg/day	No	Yes	Yes	Yes	Yes
fasting for 3 days		walk			none	none	03_002	Visit 3	Yes	6	35	05DEC15	0 (not at all) (if 0, skip questions 2 and 3)		Yes	No	< 30 minutes / day	Light	Week 6	03	Early Termination	52	Female	30OCT15	116	Placebo	<250 mg/day	No	No	<250 mg/day	No	Yes	Yes	Yes	Yes
fasting for 3 days		walk			none	none	03_002	Visit 3	Yes	6	36	06DEC15	0 (not at all) (if 0, skip questions 2 and 3)		Yes	No	< 30 minutes / day	Light	Week 6	03	Early Termination	52	Female	30OCT15	116	Placebo	<250 mg/day	No	No	<250 mg/day	No	Yes	Yes	Yes	Yes
fasting for 3 days		walk			none	none	03_002	Visit 3	Yes	6	37	07DEC15	0 (not at all) (if 0, skip questions 2 and 3)		Yes	No	< 30 minutes / day	Light	Week 6	03	Early Termination	52	Female	30OCT15	116	Placebo	<250 mg/day	No	No	<250 mg/day	No	Yes	Yes	Yes	Yes
fasting for 3 days		walk			none	none	03_002	Visit 3	Yes	6	38	08DEC15	0 (not at all) (if 0, skip questions 2 and 3)		Yes	No	< 30 minutes / day	Light	Week 6	03	Early Termination	52	Female	30OCT15	116	Placebo	<250 mg/day	No	No	<250 mg/day	No	Yes	Yes	Yes	Yes
fasting for 3 days		walk			none	none	03_002	Visit 3	Yes	6	39	09DEC15	0 (not at all) (if 0, skip questions 2 and 3)		Yes	No	< 30 minutes / day	Light	Week 6	03	Early Termination	52	Female	30OCT15	116	Placebo	<250 mg/day	No	No	<250 mg/day	No	Yes	Yes	Yes	Yes
fasting for 3 days		walk			none	none	03_002	Visit 3	Yes	6	40	10DEC15	0 (not at all) (if 0, skip questions 2 and 3)		Yes	No	< 30 minutes / day	Light	Week 6	03	Early Termination	52	Female	30OCT15	116	Placebo	<250 mg/day	No	No	<250 mg/day	No	Yes	Yes	Yes	Yes
fasting for 3 days		walk			none	none	03_002	Visit 3	Yes	6	41	11DEC15	0 (not at all) (if 0, skip questions 2 and 3)		Yes	No	< 30 minutes / day	Light	Week 6	03	Early Termination	52	Female	30OCT15	116	Placebo	<250 mg/day	No	No	<250 mg/day	No	Yes	Yes	Yes	Yes
		walk			0	0	03_002	Visit 4	No	7	42	22DEC15	0 (not at all) (if 0, skip questions 2 and 3)		No	No	< 30 minutes / day	Light	Week 12	03	Early Termination	52	Female	30OCT15	116	Placebo	<250 mg/day	No	No	<250 mg/day	No	Yes	Yes	Yes	Yes
		walk			0	0	03_002	Visit 4	No	7	43	23DEC15	0 (not at all) (if 0, skip questions 2 and 3)		No	No	< 30 minutes / day	Light	Week 12	03	Early Termination	52	Female	30OCT15	116	Placebo	<250 mg/day	No	No	<250 mg/day	No	Yes	Yes	Yes	Yes
		walk			0	0	03_002	Visit 4	No	7	44	24DEC15	0 (not at all) (if 0, skip questions 2 and 3)		No	No	< 30 minutes / day	Light	Week 12	03	Early Termination	52	Female	30OCT15	116	Placebo	<250 mg/day	No	No	<250 mg/day	No	Yes	Yes	Yes	Yes
		walk			0	0	03_002	Visit 4	No	7	45	25DEC15	0 (not at all) (if 0, skip questions 2 and 3)		No	No	< 30 minutes / day	Light	Week 12	03	Early Termination	52	Female	30OCT15	116	Placebo	<250 mg/day	No	No	<250 mg/day	No	Yes	Yes	Yes	Yes
		walk			0	0	03_002	Visit 4	No	7	46	26DEC15	0 (not at all) (if 0, skip questions 2 and 3)		No	No	< 30 minutes / day	Light	Week 12	03	Early Termination	52	Female	30OCT15	116	Placebo	<250 mg/day	No	No	<250 mg/day	No	Yes	Yes	Yes	Yes
		walk			0	0	03_002	Visit 4	No	7	47	27DEC15	0 (not at all) (if 0, skip questions 2 and 3)		No	No	< 30 minutes / day	Light	Week 12	03	Early Termination	52	Female	30OCT15	116	Placebo	<250 mg/day	No	No	<250 mg/day	No	Yes	Yes	Yes	Yes
		walk			0	0	03_002	Visit 4	No	7	48	28DEC15	0 (not at all) (if 0, skip questions 2 and 3)		No	No	< 30 minutes / day	Light	Week 12	03	Early Termination	52	Female	30OCT15	116	Placebo	<250 mg/day	No	No	<250 mg/day	No	Yes	Yes	Yes	Yes
		walk		shrimp	2	0	03_002	Visit 4	No	8	49	20DEC15	2 times	2 to 7 ounces or about 1 fillet or 4-14 pieces of sushi	No	No	30 or more minutes / day	Moderate	Week 12	03	Early Termination	52	Female	30OCT15	116	Placebo	<250 mg/day	No	No	<250 mg/day	No	Yes	Yes	Yes	Yes
		walk		shrimp	2	0	03_002	Visit 4	No	8	50	21DEC15	2 times	2 to 7 ounces or about 1 fillet or 4-14 pieces of sushi	No	No	30 or more minutes / day	Moderate	Week 12	03	Early Termination	52	Female	30OCT15	116	Placebo	<250 mg/day	No	No	<250 mg/day	No	Yes	Yes	Yes	Yes
		walk		shrimp	2	0	03_002	Visit 4	No	8	51	22DEC15	2 times	2 to 7 ounces or about 1 fillet or 4-14 pieces of sushi	No	No	30 or more minutes / day	Moderate	Week 12	03	Early Termination	52	Female	30OCT15	116	Placebo	<250 mg/day	No	No	<250 mg/day	No	Yes	Yes	Yes	Yes
		walk		shrimp	2	0	03_002	Visit 4	No	8	52	23DEC15	2 times	2 to 7 ounces or about 1 fillet or 4-14 pieces of sushi	No	No	30 or more minutes / day	Moderate	Week 12	03	Early Termination	52	Female	30OCT15	116	Placebo	<250 mg/day	No	No	<250 mg/day	No	Yes	Yes	Yes	Yes
		walk		shrimp	2	0	03_002	Visit 4	No	8	53	24DEC15	2 times	2 to 7 ounces or about 1 fillet or 4-14 pieces of sushi	No	No	30 or more minutes / day	Moderate	Week 12	03	Early Termination	52	Female	30OCT15	116	Placebo	<250 mg/day	No	No	<250 mg/day	No	Yes	Yes	Yes	Yes
		walk		shrimp	2	0	03_002	Visit 4	No	8	54	25DEC15	2 times	2 to 7 ounces or about 1 fillet or 4-14 pieces of sushi	No	No	30 or more minutes / day	Moderate	Week 12	03	Early Termination	52	Female	30OCT15	116	Placebo	<250 mg/day	No	No	<250 mg/day	No	Yes	Yes	Yes	Yes
		walk		shrimp	2	0	03_002	Visit 4	No	8	55	26DEC15	2 times	2 to 7 ounces or about 1 fillet or 4-14 pieces of sushi	No	No	30 or more minutes / day	Moderate	Week 12	03	Early Termination	52	Female	30OCT15	116	Placebo	<250 mg/day	No	No	<250 mg/day	No	Yes	Yes	Yes	Yes
		walk		shrimp, salmon	3-4	0	03_002	Visit 4	No	9	56	27DEC15	2 times	2 to 7 ounces or about 1 fillet or 4-14 pieces of sushi	No	No	30 or more minutes / day	Moderate	Week 12	03	Early Termination	52	Female	30OCT15	116	Placebo	<250 mg/day	No	No	<250 mg/day	No	Yes	Yes	Yes	Yes
		walk		shrimp, salmon	3-4	0	03_002	Visit 4	No	9	57	28DEC15	2 times	2 to 7 ounces or about 1 fillet or 4-14 pieces of sushi	No	No	30 or more minutes / day	Moderate	Week 12	03	Early Termination	52	Female	30OCT15	116	Placebo	<250 mg/day	No	No	<250 mg/day	No	Yes	Yes	Yes	Yes
		walk		shrimp, salmon	3-4	0	03_002	Visit 4	No	9	58	29DEC15	2 times	2 to 7 ounces or about 1 fillet or 4-14 pieces of sushi	No	No	30 or more minutes / day	Moderate	Week 12	03	Early Termination	52	Female	30OCT15	116	Placebo	<250 mg/day	No	No	<250 mg/day	No	Yes	Yes	Yes	Yes
		walk		shrimp, salmon	3-4	0	03_002	Visit 4	No	9	59	30DEC15	2 times	2 to 7 ounces or about 1 fillet or 4-14 pieces of sushi	No	No	30 or more minutes / day	Moderate	Week 12	03	Early Termination	52	Female	30OCT15	116	Placebo	<250 mg/day	No	No	<250 mg/day	No	Yes	Yes	Yes	Yes
		walk		shrimp, salmon	3-4	0	03_002	Visit 4	No	9	60	31DEC15	2 times	2 to 7 ounces or about 1 fillet or 4-14 pieces of sushi	No	No	30 or more minutes / day	Moderate	Week 12	03	Early Termination	52	Female	30OCT15	116	Placebo	<250 mg/day	No	No	<250 mg/day	No	Yes	Yes	Yes	Yes
		walk		shrimp, salmon	3-4	0	03_002	Visit 4	No	9	61	01JAN16	2 times	2 to 7 ounces or about 1 fillet or 4-14 pieces of sushi	No	No	30 or more minutes / day	Moderate	Week 12	03	Early Termination	52	Female	30OCT15	116	Placebo	<250 mg/day	No	No	<250 mg/day	No	Yes	Yes	Yes	Yes
		walk		shrimp, salmon	3-4	0	03_002	Visit 4	No	9	62	02JAN16	2 times	2 to 7 ounces or about 1 fillet or 4-14 pieces of sushi	No	No	30 or more minutes / day	Moderate	Week 12	03	Early Termination	52	Female	30OCT15	116	Placebo	<250 mg/day	No	No	<250 mg/day	No	Yes	Yes	Yes	Yes
		walk			3-4	0	03_002	Visit 4	No	10	63	03JAN16	0 (not at all) (if 0, skip questions 2 and 3)		No	No	30 or more minutes / day	Moderate	Week 12	03	Early Termination	52	Female	30OCT15	116	Placebo	<250 mg/day	No	No	<250 mg/day	No	Yes	Yes	Yes	Yes
		walk			3-4	0	03_002	Visit 4	No	10	64	04JAN16	0 (not at all) (if 0, skip questions 2 and 3)		No	No	30 or more minutes / day	Moderate	Week 12	03	Early Termination	52	Female	30OCT15	116	Placebo	<250 mg/day	No	No	<250 mg/day	No	Yes	Yes	Yes	Yes
		walk			3-4	0	03_002	Visit 4	No	10	65	05JAN16	0 (not at all) (if 0, skip questions 2 and 3)		No	No	30 or more minutes / day	Moderate	Week 12	03	Early Termination	52	Female	30OCT15	116	Placebo	<250 mg/day	No	No	<250 mg/day	No	Yes	Yes	Yes	Yes
		walk			3-4	0	03_002	Visit 4	No	10	66	06JAN16	0 (not at all) (if 0, skip questions 2 and 3)		No	No	30 or more minutes / day	Moderate	Week 12	03	Early Termination	52	Female	30OCT15	116	Placebo	<250 mg/day	No	No	<250 mg/day	No	Yes	Yes	Yes	Yes
		walk			3-4	0	03_002	Visit 4	No	10	67	07JAN16	0 (not at all) (if 0, skip questions 2 and 3)		No	No	30 or more minutes / day	Moderate	Week 12	03	Early Termination	52	Female	30OCT15	116	Placebo	<250 mg/day	No	No	<250 mg/day	No	Yes	Yes	Yes	Yes
		walk			3-4	0	03_002	Visit 4	No	10	68	08JAN16	0 (not at all) (if 0, skip questions 2 and 3)		No	No	30 or more minutes / day	Moderate	Week 12	03	Early Termination	52	Female	30OCT15	116	Placebo	<250 mg/day	No	No	<250 mg/day	No	Yes	Yes	Yes	Yes
		walk			3-4	0	03_002	Visit 4	No	10	69	09JAN16	0 (not at all) (if 0, skip questions 2 and 3)		No	No	30 or more minutes / day	Moderate	Week 12	03	Early Termination	52	Female	30OCT15	116	Placebo	<250 mg/day	No	No	<250 mg/day	No	Yes	Yes	Yes	Yes
		walk		shrimp	2	0	03_002	Visit 4	No	11	70	10JAN16	1 time	2 to 7 ounces or about 1 fillet or 4-14 pieces of sushi	No	No	30 or more minutes / day	Moderate	Week 12	03	Early Termination	52	Female	30OCT15	116	Placebo	<250 mg/day	No	No	<250 mg/day	No	Yes	Yes	Yes	Yes
		walk		shrimp	2	0	03_002	Visit 4	No	11	71	11JAN16	1 time	2 to 7 ounces or about 1 fillet or 4-14 pieces of sushi	No	No	30 or more minutes / day	Moderate	Week 12	03	Early Termination	52	Female	30OCT15	116	Placebo	<250 mg/day	No	No	<250 mg/day	No	Yes	Yes	Yes	Yes
		walk		shrimp	2	0	03_002	Visit 4	No	11	72	12JAN16	1 time	2 to 7 ounces or about 1 fillet or 4-14 pieces of sushi	No	No	30 or more minutes / day	Moderate	Week 12	03	Early Termination	52	Female	30OCT15	116	Placebo	<250 mg/day	No	No	<250 mg/day	No	Yes	Yes	Yes	Yes
		walk		shrimp	2	0	03_002	Visit 4	No	11	73	13JAN16	1 time	2 to 7 ounces or about 1 fillet or 4-14 pieces of sushi	No	No	30 or more minutes / day	Moderate	Week 12	03	Early Termination	52	Female	30OCT15	116	Placebo	<250 mg/day	No	No	<250 mg/day	No	Yes	Yes	Yes	Yes
		walk		shrimp	2	0	03_002	Visit 4	No	11	74	14JAN16	1 time	2 to 7 ounces or about 1 fillet or 4-14 pieces of sushi	No	No	30 or more minutes / day	Moderate	Week 12	03	Early Termination	52	Female	30OCT15	116	Placebo	<250 mg/day	No	No	<250 mg/day	No	Yes	Yes	Yes	Yes
		walk		shrimp	2	0	03_002	Visit 4	No	11	75	15JAN16	1 time	2 to 7 ounces or about 1 fillet or 4-14 pieces of sushi	No	No	30 or more minutes / day	Moderate	Week 12	03	Early Termination	52	Female	30OCT15	116	Placebo	<250 mg/day	No	No	<250 mg/day	No	Yes	Yes	Yes	Yes
		walk		shrimp	2	0	03_002	Visit 4	No	11	76	16JAN16	1 time	2 to 7 ounces or about 1 fillet or 4-14 pieces of sushi	No	No	30 or more minutes / day	Moderate	Week 12	03	Early Termination	52	Female	30OCT15	116	Placebo	<250 mg/day	No	No	<250 mg/day	No	Yes	Yes	Yes	Yes
		WALK		shrimp	3	0	03_002	Visit 4	No	12	77	17JAN16	1 time	2 to 7 ounces or about 1 fillet or 4-14 pieces of sushi	No	No	30 or more minutes / day	Moderate	Week 12	03	Early Termination	52	Female	30OCT15	116	Placebo	<250 mg/day	No	No	<250 mg/day	No	Yes	Yes	Yes	Yes
		WALK		shrimp	3	0	03_002	Visit 4	No	12	78	18JAN16	1 time	2 to 7 ounces or about 1 fillet or 4-14 pieces of sushi	No	No	30 or more minutes / day	Moderate	Week 12	03	Early Termination	52	Female	30OCT15	116	Placebo	<250 mg/day	No	No	<250 mg/day	No	Yes	Yes	Yes	Yes
		WALK		shrimp	3	0	03_002	Visit 4	No	12	79	19JAN16	1 time	2 to 7 ounces or about 1 fillet or 4-14 pieces of sushi	No	No	30 or more minutes / day	Moderate	Week 12	03	Early Termination	52	Female	30OCT15	116	Placebo	<250 mg/day	No	No	<250 mg/day	No	Yes	Yes	Yes	Yes
		WALK		shrimp	3	0	03_002	Visit 4	No	12	80	20JAN16	1 time	2 to 7 ounces or about 1 fillet or 4-14 pieces of sushi	No	No	30 or more minutes / day	Moderate	Week 12	03	Early Termination	52	Female	30OCT15	116	Placebo	<250 mg/day	No	No	<250 mg/day	No	Yes	Yes	Yes	Yes
		WALK		shrimp	3	0	03_002	Visit 4	No	12	81	21JAN16	1 time	2 to 7 ounces or about 1 fillet or 4-14 pieces of sushi	No	No	30 or more minutes / day	Moderate	Week 12	03	Early Termination	52	Female	30OCT15	116	Placebo	<250 mg/day	No	No	<250 mg/day	No	Yes	Yes	Yes	Yes
		WALK		shrimp	3	0	03_002	Visit 4	No	12	82	22JAN16	1 time	2 to 7 ounces or about 1 fillet or 4-14 pieces of sushi	No	No	30 or more minutes / day	Moderate	Week 12	03	Early Termination	52	Female	30OCT15	116	Placebo	<250 mg/day	No	No	<250 mg/day	No	Yes	Yes	Yes	Yes
		WALK		shrimp	3	0	03_002	Visit 4	No	12	83	23JAN16	1 time	2 to 7 ounces or about 1 fillet or 4-14 pieces of sushi	No	No	30 or more minutes / day	Moderate	Week 12	03	Early Termination	52	Female	30OCT15	116	Placebo	<250 mg/day	No	No	<250 mg/day	No	Yes	Yes	Yes	Yes
				salmon shrimp	4	0	03_002	Visit 5	No	13	84	24OCT16	2 times	2 to 7 ounces or about 1 fillet or 4-14 pieces of sushi	No	No	0 minutes (no exercise) / day		Week 24	03	Early Termination	52	Female	30OCT15	116	Placebo	<250 mg/day	No	No	<250 mg/day	No	Yes	Yes	Yes	Yes
				salmon shrimp	4	0	03_002	Visit 5	No	13	85	25OCT16	2 times	2 to 7 ounces or about 1 fillet or 4-14 pieces of sushi	No	No	0 minutes (no exercise) / day		Week 24	03	Early Termination	52	Female	30OCT15	116	Placebo	<250 mg/day	No	No	<250 mg/day	No	Yes	Yes	Yes	Yes
				salmon shrimp	4	0	03_002	Visit 5	No	13	86	26OCT16	2 times	2 to 7 ounces or about 1 fillet or 4-14 pieces of sushi	No	No	0 minutes (no exercise) / day		Week 24	03	Early Termination	52	Female	30OCT15	116	Placebo	<250 mg/day	No	No	<250 mg/day	No	Yes	Yes	Yes	Yes
				salmon shrimp	4	0	03_002	Visit 5	No	13	87	27OCT16	2 times	2 to 7 ounces or about 1 fillet or 4-14 pieces of sushi	No	No	0 minutes (no exercise) / day		Week 24	03	Early Termination	52	Female	30OCT15	116	Placebo	<250 mg/day	No	No	<250 mg/day	No	Yes	Yes	Yes	Yes
				salmon shrimp	4	0	03_002	Visit 5	No	13	88	28OCT16	2 times	2 to 7 ounces or about 1 fillet or 4-14 pieces of sushi	No	No	0 minutes (no exercise) / day		Week 24	03	Early Termination	52	Female	30OCT15	116	Placebo	<250 mg/day	No	No	<250 mg/day	No	Yes	Yes	Yes	Yes
				salmon shrimp	4	0	03_002	Visit 5	No	13	89	29OCT16	2 times	2 to 7 ounces or about 1 fillet or 4-14 pieces of sushi	No	No	0 minutes (no exercise) / day		Week 24	03	Early Termination	52	Female	30OCT15	116	Placebo	<250 mg/day	No	No	<250 mg/day	No	Yes	Yes	Yes	Yes
				salmon shrimp	4	0	03_002	Visit 5	No	13	90	30OCT16	2 times	2 to 7 ounces or about 1 fillet or 4-14 pieces of sushi	No	No	0 minutes (no exercise) / day		Week 24	03	Early Termination	52	Female	30OCT15	116	Placebo	<250 mg/day	No	No	<250 mg/day	No	Yes	Yes	Yes	Yes
		Walking every day, paired with weighted Hikes through hills and steep terrain.	only one taken in clinic	I had Tilapia filet.	Not at all	Not at all	03_003	Visit 3	Yes	1	0	24NOV15	2 times	2 to 7 ounces or about 1 fillet or 4-14 pieces of sushi	No	No	30 or more minutes / day	Moderate	Week 6	03	Entered	25	Male	24NOV15	121	MF4637	<250 mg/day	No	No	<250 mg/day	No	Yes	Yes	Yes	Yes
		Walking every day, paired with weighted Hikes through hills and steep terrain.		I had Tilapia filet.	Not at all	Not at all	03_003	Visit 3	Yes	1	1	25NOV15	2 times	2 to 7 ounces or about 1 fillet or 4-14 pieces of sushi	No	No	30 or more minutes / day	Moderate	Week 6	03	Entered	25	Male	24NOV15	121	MF4637	<250 mg/day	No	No	<250 mg/day	No	Yes	Yes	Yes	Yes
		Walking every day, paired with weighted Hikes through hills and steep terrain.		I had Tilapia filet.	Not at all	Not at all	03_003	Visit 3	Yes	1	2	26NOV15	2 times	2 to 7 ounces or about 1 fillet or 4-14 pieces of sushi	No	No	30 or more minutes / day	Moderate	Week 6	03	Entered	25	Male	24NOV15	121	MF4637	<250 mg/day	No	No	<250 mg/day	No	Yes	Yes	Yes	Yes
		Walking every day, paired with weighted Hikes through hills and steep terrain.		I had Tilapia filet.	Not at all	Not at all	03_003	Visit 3	Yes	1	3	27NOV15	2 times	2 to 7 ounces or about 1 fillet or 4-14 pieces of sushi	No	No	30 or more minutes / day	Moderate	Week 6	03	Entered	25	Male	24NOV15	121	MF4637	<250 mg/day	No	No	<250 mg/day	No	Yes	Yes	Yes	Yes
		Walking every day, paired with weighted Hikes through hills and steep terrain.		I had Tilapia filet.	Not at all	Not at all	03_003	Visit 3	Yes	1	4	28NOV15	2 times	2 to 7 ounces or about 1 fillet or 4-14 pieces of sushi	No	No	30 or more minutes / day	Moderate	Week 6	03	Entered	25	Male	24NOV15	121	MF4637	<250 mg/day	No	No	<250 mg/day	No	Yes	Yes	Yes	Yes
		Walking every day, paired with weighted Hikes through hills and steep terrain.		I had Tilapia filet.	Not at all	Not at all	03_003	Visit 3	Yes	1	5	29NOV15	2 times	2 to 7 ounces or about 1 fillet or 4-14 pieces of sushi	No	No	30 or more minutes / day	Moderate	Week 6	03	Entered	25	Male	24NOV15	121	MF4637	<250 mg/day	No	No	<250 mg/day	No	Yes	Yes	Yes	Yes
		Walking every day, paired with weighted Hikes through hills and steep terrain.		I had Tilapia filet.	Not at all	Not at all	03_003	Visit 3	Yes	1	6	30NOV15	2 times	2 to 7 ounces or about 1 fillet or 4-14 pieces of sushi	No	No	30 or more minutes / day	Moderate	Week 6	03	Entered	25	Male	24NOV15	121	MF4637	<250 mg/day	No	No	<250 mg/day	No	Yes	Yes	Yes	Yes
		Walking daily, paired with backpacking through the hills.			I had a Whataburger as a reward for a 6 Mile hike	Not at all	03_003	Visit 3	Yes	2	7	30NOV15	0 (not at all) (if 0, skip questions 2 and 3)		No	No	30 or more minutes / day	Moderate	Week 6	03	Entered	25	Male	24NOV15	121	MF4637	<250 mg/day	No	No	<250 mg/day	No	Yes	Yes	Yes	Yes
		Walking daily, paired with backpacking through the hills.			I had a Whataburger as a reward for a 6 Mile hike	Not at all	03_003	Visit 3	Yes	2	8	01DEC15	0 (not at all) (if 0, skip questions 2 and 3)		No	No	30 or more minutes / day	Moderate	Week 6	03	Entered	25	Male	24NOV15	121	MF4637	<250 mg/day	No	No	<250 mg/day	No	Yes	Yes	Yes	Yes
		Walking daily, paired with backpacking through the hills.			I had a Whataburger as a reward for a 6 Mile hike	Not at all	03_003	Visit 3	Yes	2	9	02DEC15	0 (not at all) (if 0, skip questions 2 and 3)		No	No	30 or more minutes / day	Moderate	Week 6	03	Entered	25	Male	24NOV15	121	MF4637	<250 mg/day	No	No	<250 mg/day	No	Yes	Yes	Yes	Yes
		Walking daily, paired with backpacking through the hills.			I had a Whataburger as a reward for a 6 Mile hike	Not at all	03_003	Visit 3	Yes	2	10	03DEC15	0 (not at all) (if 0, skip questions 2 and 3)		No	No	30 or more minutes / day	Moderate	Week 6	03	Entered	25	Male	24NOV15	121	MF4637	<250 mg/day	No	No	<250 mg/day	No	Yes	Yes	Yes	Yes
		Walking daily, paired with backpacking through the hills.	I only took two of the capsules this day because of schedule rushing.		I had a Whataburger as a reward for a 6 Mile hike	Not at all	03_003	Visit 3	No	2	11	04DEC15	0 (not at all) (if 0, skip questions 2 and 3)		No	No	30 or more minutes / day	Moderate	Week 6	03	Entered	25	Male	24NOV15	121	MF4637	<250 mg/day	No	No	<250 mg/day	No	Yes	Yes	Yes	Yes
		Walking daily, paired with backpacking through the hills.			I had a Whataburger as a reward for a 6 Mile hike	Not at all	03_003	Visit 3	Yes	2	12	05DEC15	0 (not at all) (if 0, skip questions 2 and 3)		No	No	30 or more minutes / day	Moderate	Week 6	03	Entered	25	Male	24NOV15	121	MF4637	<250 mg/day	No	No	<250 mg/day	No	Yes	Yes	Yes	Yes
		Walking daily, paired with backpacking through the hills.			I had a Whataburger as a reward for a 6 Mile hike	Not at all	03_003	Visit 3	Yes	2	13	06DEC15	0 (not at all) (if 0, skip questions 2 and 3)		No	No	30 or more minutes / day	Moderate	Week 6	03	Entered	25	Male	24NOV15	121	MF4637	<250 mg/day	No	No	<250 mg/day	No	Yes	Yes	Yes	Yes
		Walking daily, paired with backpacking through the hills.			Not at all	none at all	03_003	Visit 3	Yes	3	14	08DEC15	0 (not at all) (if 0, skip questions 2 and 3)		No	No	30 or more minutes / day	Moderate	Week 6	03	Entered	25	Male	24NOV15	121	MF4637	<250 mg/day	No	No	<250 mg/day	No	Yes	Yes	Yes	Yes
		Walking daily, paired with backpacking through the hills.			Not at all	none at all	03_003	Visit 3	Yes	3	15	09DEC15	0 (not at all) (if 0, skip questions 2 and 3)		No	No	30 or more minutes / day	Moderate	Week 6	03	Entered	25	Male	24NOV15	121	MF4637	<250 mg/day	No	No	<250 mg/day	No	Yes	Yes	Yes	Yes
		Walking daily, paired with backpacking through the hills.			Not at all	none at all	03_003	Visit 3	Yes	3	16	10DEC15	0 (not at all) (if 0, skip questions 2 and 3)		No	No	30 or more minutes / day	Moderate	Week 6	03	Entered	25	Male	24NOV15	121	MF4637	<250 mg/day	No	No	<250 mg/day	No	Yes	Yes	Yes	Yes
		Walking daily, paired with backpacking through the hills.			Not at all	none at all	03_003	Visit 3	Yes	3	17	11DEC15	0 (not at all) (if 0, skip questions 2 and 3)		No	No	30 or more minutes / day	Moderate	Week 6	03	Entered	25	Male	24NOV15	121	MF4637	<250 mg/day	No	No	<250 mg/day	No	Yes	Yes	Yes	Yes
		Walking daily, paired with backpacking through the hills.			Not at all	none at all	03_003	Visit 3	Yes	3	18	12DEC15	0 (not at all) (if 0, skip questions 2 and 3)		No	No	30 or more minutes / day	Moderate	Week 6	03	Entered	25	Male	24NOV15	121	MF4637	<250 mg/day	No	No	<250 mg/day	No	Yes	Yes	Yes	Yes
		Walking daily, paired with backpacking through the hills.			Not at all	none at all	03_003	Visit 3	Yes	3	19	13DEC15	0 (not at all) (if 0, skip questions 2 and 3)		No	No	30 or more minutes / day	Moderate	Week 6	03	Entered	25	Male	24NOV15	121	MF4637	<250 mg/day	No	No	<250 mg/day	No	Yes	Yes	Yes	Yes
		Walking daily, paired with backpacking through the hills.			Not at all	none at all	03_003	Visit 3	Yes	3	20	14DEC15	0 (not at all) (if 0, skip questions 2 and 3)		No	No	30 or more minutes / day	Moderate	Week 6	03	Entered	25	Male	24NOV15	121	MF4637	<250 mg/day	No	No	<250 mg/day	No	Yes	Yes	Yes	Yes
		Walking daily, paired with backpacking through the hills.			None	Not at all	03_003	Visit 3	Yes	4	21	13DEC15	0 (not at all) (if 0, skip questions 2 and 3)		No	No	30 or more minutes / day	Moderate	Week 6	03	Entered	25	Male	24NOV15	121	MF4637	<250 mg/day	No	No	<250 mg/day	No	Yes	Yes	Yes	Yes
		Walking daily, paired with backpacking through the hills.			None	Not at all	03_003	Visit 3	Yes	4	22	14DEC15	0 (not at all) (if 0, skip questions 2 and 3)		No	No	30 or more minutes / day	Moderate	Week 6	03	Entered	25	Male	24NOV15	121	MF4637	<250 mg/day	No	No	<250 mg/day	No	Yes	Yes	Yes	Yes
		Walking daily, paired with backpacking through the hills.			None	Not at all	03_003	Visit 3	Yes	4	23	15DEC15	0 (not at all) (if 0, skip questions 2 and 3)		No	No	30 or more minutes / day	Moderate	Week 6	03	Entered	25	Male	24NOV15	121	MF4637	<250 mg/day	No	No	<250 mg/day	No	Yes	Yes	Yes	Yes
		Walking daily, paired with backpacking through the hills.			None	Not at all	03_003	Visit 3	Yes	4	24	16DEC15	0 (not at all) (if 0, skip questions 2 and 3)		No	No	30 or more minutes / day	Moderate	Week 6	03	Entered	25	Male	24NOV15	121	MF4637	<250 mg/day	No	No	<250 mg/day	No	Yes	Yes	Yes	Yes
		Walking daily, paired with backpacking through the hills.			None	Not at all	03_003	Visit 3	Yes	4	25	17DEC15	0 (not at all) (if 0, skip questions 2 and 3)		No	No	30 or more minutes / day	Moderate	Week 6	03	Entered	25	Male	24NOV15	121	MF4637	<250 mg/day	No	No	<250 mg/day	No	Yes	Yes	Yes	Yes
		Walking daily, paired with backpacking through the hills.			None	Not at all	03_003	Visit 3	Yes	4	26	18DEC15	0 (not at all) (if 0, skip questions 2 and 3)		No	No	30 or more minutes / day	Moderate	Week 6	03	Entered	25	Male	24NOV15	121	MF4637	<250 mg/day	No	No	<250 mg/day	No	Yes	Yes	Yes	Yes
		Walking daily, paired with backpacking through the hills.			None	Not at all	03_003	Visit 3	Yes	4	27	19DEC15	0 (not at all) (if 0, skip questions 2 and 3)		No	No	30 or more minutes / day	Moderate	Week 6	03	Entered	25	Male	24NOV15	121	MF4637	<250 mg/day	No	No	<250 mg/day	No	Yes	Yes	Yes	Yes
		Walking daily, paired with backpacking through the hills.			None	not at all	03_003	Visit 3	Yes	5	28	13DEC15	0 (not at all) (if 0, skip questions 2 and 3)		No	No	30 or more minutes / day	Moderate	Week 6	03	Entered	25	Male	24NOV15	121	MF4637	<250 mg/day	No	No	<250 mg/day	No	Yes	Yes	Yes	Yes
		Walking daily, paired with backpacking through the hills.			None	not at all	03_003	Visit 3	Yes	5	29	14DEC15	0 (not at all) (if 0, skip questions 2 and 3)		No	No	30 or more minutes / day	Moderate	Week 6	03	Entered	25	Male	24NOV15	121	MF4637	<250 mg/day	No	No	<250 mg/day	No	Yes	Yes	Yes	Yes
		Walking daily, paired with backpacking through the hills.			None	not at all	03_003	Visit 3	Yes	5	30	15DEC15	0 (not at all) (if 0, skip questions 2 and 3)		No	No	30 or more minutes / day	Moderate	Week 6	03	Entered	25	Male	24NOV15	121	MF4637	<250 mg/day	No	No	<250 mg/day	No	Yes	Yes	Yes	Yes
		Walking daily, paired with backpacking through the hills.			None	not at all	03_003	Visit 3	Yes	5	31	16DEC15	0 (not at all) (if 0, skip questions 2 and 3)		No	No	30 or more minutes / day	Moderate	Week 6	03	Entered	25	Male	24NOV15	121	MF4637	<250 mg/day	No	No	<250 mg/day	No	Yes	Yes	Yes	Yes
		Walking daily, paired with backpacking through the hills.			None	not at all	03_003	Visit 3	Yes	5	32	17DEC15	0 (not at all) (if 0, skip questions 2 and 3)		No	No	30 or more minutes / day	Moderate	Week 6	03	Entered	25	Male	24NOV15	121	MF4637	<250 mg/day	No	No	<250 mg/day	No	Yes	Yes	Yes	Yes
		Walking daily, paired with backpacking through the hills.			None	not at all	03_003	Visit 3	Yes	5	33	18DEC15	0 (not at all) (if 0, skip questions 2 and 3)		No	No	30 or more minutes / day	Moderate	Week 6	03	Entered	25	Male	24NOV15	121	MF4637	<250 mg/day	No	No	<250 mg/day	No	Yes	Yes	Yes	Yes
		Walking daily, paired with backpacking through the hills.			None	not at all	03_003	Visit 3	Yes	5	34	19DEC15	0 (not at all) (if 0, skip questions 2 and 3)		No	No	30 or more minutes / day	Moderate	Week 6	03	Entered	25	Male	24NOV15	121	MF4637	<250 mg/day	No	No	<250 mg/day	No	Yes	Yes	Yes	Yes
		Walking daily, paired with backpacking through the hills.			Not at all	Not at all	03_003	Visit 3	Yes	6	35	03JAN16	0 (not at all) (if 0, skip questions 2 and 3)		No	No	30 or more minutes / day	Moderate	Week 6	03	Entered	25	Male	24NOV15	121	MF4637	<250 mg/day	No	No	<250 mg/day	No	Yes	Yes	Yes	Yes
		Walking daily, paired with backpacking through the hills.			Not at all	Not at all	03_003	Visit 3	Yes	6	36	04JAN16	0 (not at all) (if 0, skip questions 2 and 3)		No	No	30 or more minutes / day	Moderate	Week 6	03	Entered	25	Male	24NOV15	121	MF4637	<250 mg/day	No	No	<250 mg/day	No	Yes	Yes	Yes	Yes
		Walking daily, paired with backpacking through the hills.			Not at all	Not at all	03_003	Visit 3	Yes	6	37	05JAN16	0 (not at all) (if 0, skip questions 2 and 3)		No	No	30 or more minutes / day	Moderate	Week 6	03	Entered	25	Male	24NOV15	121	MF4637	<250 mg/day	No	No	<250 mg/day	No	Yes	Yes	Yes	Yes
		Walking daily, paired with backpacking through the hills.			Not at all	Not at all	03_003	Visit 3	Yes	6	38	06JAN16	0 (not at all) (if 0, skip questions 2 and 3)		No	No	30 or more minutes / day	Moderate	Week 6	03	Entered	25	Male	24NOV15	121	MF4637	<250 mg/day	No	No	<250 mg/day	No	Yes	Yes	Yes	Yes
		Walking daily, paired with backpacking through the hills.			Not at all	Not at all	03_003	Visit 3	Yes	6	39	07JAN16	0 (not at all) (if 0, skip questions 2 and 3)		No	No	30 or more minutes / day	Moderate	Week 6	03	Entered	25	Male	24NOV15	121	MF4637	<250 mg/day	No	No	<250 mg/day	No	Yes	Yes	Yes	Yes
		Walking daily, paired with backpacking through the hills.			Not at all	Not at all	03_003	Visit 3	Yes	6	40	08JAN16	0 (not at all) (if 0, skip questions 2 and 3)		No	No	30 or more minutes / day	Moderate	Week 6	03	Entered	25	Male	24NOV15	121	MF4637	<250 mg/day	No	No	<250 mg/day	No	Yes	Yes	Yes	Yes
		Walking daily, paired with backpacking through the hills.			Not at all	Not at all	03_003	Visit 3	Yes	6	41	09JAN16	0 (not at all) (if 0, skip questions 2 and 3)		No	No	30 or more minutes / day	Moderate	Week 6	03	Entered	25	Male	24NOV15	121	MF4637	<250 mg/day	No	No	<250 mg/day	No	Yes	Yes	Yes	Yes
		cardio and long walks with weights			I have been in the process of moving so I have had	None	03_003	Visit 4	Yes	7	42	14JAN16	0 (not at all) (if 0, skip questions 2 and 3)		No	No	< 30 minutes / day	Moderate	Week 12	03	Entered	25	Male	24NOV15	121	MF4637	<250 mg/day	No	No	<250 mg/day	No	Yes	Yes	Yes	Yes
		cardio and long walks with weights			I have been in the process of moving so I have had	None	03_003	Visit 4	Yes	7	43	15JAN16	0 (not at all) (if 0, skip questions 2 and 3)		No	No	< 30 minutes / day	Moderate	Week 12	03	Entered	25	Male	24NOV15	121	MF4637	<250 mg/day	No	No	<250 mg/day	No	Yes	Yes	Yes	Yes
		cardio and long walks with weights			I have been in the process of moving so I have had	None	03_003	Visit 4	Yes	7	44	16JAN16	0 (not at all) (if 0, skip questions 2 and 3)		No	No	< 30 minutes / day	Moderate	Week 12	03	Entered	25	Male	24NOV15	121	MF4637	<250 mg/day	No	No	<250 mg/day	No	Yes	Yes	Yes	Yes
		cardio and long walks with weights			I have been in the process of moving so I have had	None	03_003	Visit 4	Yes	7	45	17JAN16	0 (not at all) (if 0, skip questions 2 and 3)		No	No	< 30 minutes / day	Moderate	Week 12	03	Entered	25	Male	24NOV15	121	MF4637	<250 mg/day	No	No	<250 mg/day	No	Yes	Yes	Yes	Yes
		cardio and long walks with weights			I have been in the process of moving so I have had	None	03_003	Visit 4	Yes	7	46	18JAN16	0 (not at all) (if 0, skip questions 2 and 3)		No	No	< 30 minutes / day	Moderate	Week 12	03	Entered	25	Male	24NOV15	121	MF4637	<250 mg/day	No	No	<250 mg/day	No	Yes	Yes	Yes	Yes
		cardio and long walks with weights			I have been in the process of moving so I have had	None	03_003	Visit 4	Yes	7	47	19JAN16	0 (not at all) (if 0, skip questions 2 and 3)		No	No	< 30 minutes / day	Moderate	Week 12	03	Entered	25	Male	24NOV15	121	MF4637	<250 mg/day	No	No	<250 mg/day	No	Yes	Yes	Yes	Yes
		cardio and long walks with weights			I have been in the process of moving so I have had	None	03_003	Visit 4	Yes	7	48	20JAN16	0 (not at all) (if 0, skip questions 2 and 3)		No	No	< 30 minutes / day	Moderate	Week 12	03	Entered	25	Male	24NOV15	121	MF4637	<250 mg/day	No	No	<250 mg/day	No	Yes	Yes	Yes	Yes
		Hiking, weight training, cardio			once.	Not at all	03_003	Visit 4	Yes	8	49	12JAN16	0 (not at all) (if 0, skip questions 2 and 3)		No	No	30 or more minutes / day	Moderate	Week 12	03	Entered	25	Male	24NOV15	121	MF4637	<250 mg/day	No	No	<250 mg/day	No	Yes	Yes	Yes	Yes
		Hiking, weight training, cardio			once.	Not at all	03_003	Visit 4	Yes	8	50	13JAN16	0 (not at all) (if 0, skip questions 2 and 3)		No	No	30 or more minutes / day	Moderate	Week 12	03	Entered	25	Male	24NOV15	121	MF4637	<250 mg/day	No	No	<250 mg/day	No	Yes	Yes	Yes	Yes
		Hiking, weight training, cardio			once.	Not at all	03_003	Visit 4	Yes	8	51	14JAN16	0 (not at all) (if 0, skip questions 2 and 3)		No	No	30 or more minutes / day	Moderate	Week 12	03	Entered	25	Male	24NOV15	121	MF4637	<250 mg/day	No	No	<250 mg/day	No	Yes	Yes	Yes	Yes
		Hiking, weight training, cardio			once.	Not at all	03_003	Visit 4	Yes	8	52	15JAN16	0 (not at all) (if 0, skip questions 2 and 3)		No	No	30 or more minutes / day	Moderate	Week 12	03	Entered	25	Male	24NOV15	121	MF4637	<250 mg/day	No	No	<250 mg/day	No	Yes	Yes	Yes	Yes
		Hiking, weight training, cardio			once.	Not at all	03_003	Visit 4	Yes	8	53	16JAN16	0 (not at all) (if 0, skip questions 2 and 3)		No	No	30 or more minutes / day	Moderate	Week 12	03	Entered	25	Male	24NOV15	121	MF4637	<250 mg/day	No	No	<250 mg/day	No	Yes	Yes	Yes	Yes
		Hiking, weight training, cardio			once.	Not at all	03_003	Visit 4	Yes	8	54	17JAN16	0 (not at all) (if 0, skip questions 2 and 3)		No	No	30 or more minutes / day	Moderate	Week 12	03	Entered	25	Male	24NOV15	121	MF4637	<250 mg/day	No	No	<250 mg/day	No	Yes	Yes	Yes	Yes
		Hiking, weight training, cardio			once.	Not at all	03_003	Visit 4	Yes	8	55	18JAN16	0 (not at all) (if 0, skip questions 2 and 3)		No	No	30 or more minutes / day	Moderate	Week 12	03	Entered	25	Male	24NOV15	121	MF4637	<250 mg/day	No	No	<250 mg/day	No	Yes	Yes	Yes	Yes
		cartio weight training			none	none	03_003	Visit 4	Yes	9	56	21JAN16	0 (not at all) (if 0, skip questions 2 and 3)		No	No	30 or more minutes / day	Moderate	Week 12	03	Entered	25	Male	24NOV15	121	MF4637	<250 mg/day	No	No	<250 mg/day	No	Yes	Yes	Yes	Yes
		cartio weight training	left the bottlin in my wife's car only took the night portion		none	none	03_003	Visit 4	No	9	57	22JAN16	0 (not at all) (if 0, skip questions 2 and 3)		No	No	30 or more minutes / day	Moderate	Week 12	03	Entered	25	Male	24NOV15	121	MF4637	<250 mg/day	No	No	<250 mg/day	No	Yes	Yes	Yes	Yes
		cartio weight training			none	none	03_003	Visit 4	Yes	9	58	23JAN16	0 (not at all) (if 0, skip questions 2 and 3)		No	No	30 or more minutes / day	Moderate	Week 12	03	Entered	25	Male	24NOV15	121	MF4637	<250 mg/day	No	No	<250 mg/day	No	Yes	Yes	Yes	Yes
		cartio weight training			none	none	03_003	Visit 4	Yes	9	59	24JAN16	0 (not at all) (if 0, skip questions 2 and 3)		No	No	30 or more minutes / day	Moderate	Week 12	03	Entered	25	Male	24NOV15	121	MF4637	<250 mg/day	No	No	<250 mg/day	No	Yes	Yes	Yes	Yes
		cartio weight training			none	none	03_003	Visit 4	Yes	9	60	25JAN16	0 (not at all) (if 0, skip questions 2 and 3)		No	No	30 or more minutes / day	Moderate	Week 12	03	Entered	25	Male	24NOV15	121	MF4637	<250 mg/day	No	No	<250 mg/day	No	Yes	Yes	Yes	Yes
		cartio weight training			none	none	03_003	Visit 4	Yes	9	61	26JAN16	0 (not at all) (if 0, skip questions 2 and 3)		No	No	30 or more minutes / day	Moderate	Week 12	03	Entered	25	Male	24NOV15	121	MF4637	<250 mg/day	No	No	<250 mg/day	No	Yes	Yes	Yes	Yes
		cartio weight training			none	none	03_003	Visit 4	Yes	9	62	27JAN16	0 (not at all) (if 0, skip questions 2 and 3)		No	No	30 or more minutes / day	Moderate	Week 12	03	Entered	25	Male	24NOV15	121	MF4637	<250 mg/day	No	No	<250 mg/day	No	Yes	Yes	Yes	Yes
					0	0	03_003	Visit 4	Yes	10	63	04FEB16	0 (not at all) (if 0, skip questions 2 and 3)		No	No	0 minutes (no exercise) / day		Week 12	03	Entered	25	Male	24NOV15	121	MF4637	<250 mg/day	No	No	<250 mg/day	No	Yes	Yes	Yes	Yes
					0	0	03_003	Visit 4	Yes	10	64	05FEB16	0 (not at all) (if 0, skip questions 2 and 3)		No	No	0 minutes (no exercise) / day		Week 12	03	Entered	25	Male	24NOV15	121	MF4637	<250 mg/day	No	No	<250 mg/day	No	Yes	Yes	Yes	Yes
					0	0	03_003	Visit 4	Yes	10	65	06FEB16	0 (not at all) (if 0, skip questions 2 and 3)		No	No	0 minutes (no exercise) / day		Week 12	03	Entered	25	Male	24NOV15	121	MF4637	<250 mg/day	No	No	<250 mg/day	No	Yes	Yes	Yes	Yes
					0	0	03_003	Visit 4	Yes	10	66	07FEB16	0 (not at all) (if 0, skip questions 2 and 3)		No	No	0 minutes (no exercise) / day		Week 12	03	Entered	25	Male	24NOV15	121	MF4637	<250 mg/day	No	No	<250 mg/day	No	Yes	Yes	Yes	Yes
					0	0	03_003	Visit 4	Yes	10	67	08FEB16	0 (not at all) (if 0, skip questions 2 and 3)		No	No	0 minutes (no exercise) / day		Week 12	03	Entered	25	Male	24NOV15	121	MF4637	<250 mg/day	No	No	<250 mg/day	No	Yes	Yes	Yes	Yes
					0	0	03_003	Visit 4	Yes	10	68	09FEB16	0 (not at all) (if 0, skip questions 2 and 3)		No	No	0 minutes (no exercise) / day		Week 12	03	Entered	25	Male	24NOV15	121	MF4637	<250 mg/day	No	No	<250 mg/day	No	Yes	Yes	Yes	Yes
					0	0	03_003	Visit 4	Yes	10	69	10FEB16	0 (not at all) (if 0, skip questions 2 and 3)		No	No	0 minutes (no exercise) / day		Week 12	03	Entered	25	Male	24NOV15	121	MF4637	<250 mg/day	No	No	<250 mg/day	No	Yes	Yes	Yes	Yes
		walk			0	0	03_003	Visit 4	Yes	11	70	11FEB16	0 (not at all) (if 0, skip questions 2 and 3)		No	No	< 30 minutes / day	Moderate	Week 12	03	Entered	25	Male	24NOV15	121	MF4637	<250 mg/day	No	No	<250 mg/day	No	Yes	Yes	Yes	Yes
		walk			0	0	03_003	Visit 4	Yes	11	71	12FEB16	0 (not at all) (if 0, skip questions 2 and 3)		No	No	< 30 minutes / day	Moderate	Week 12	03	Entered	25	Male	24NOV15	121	MF4637	<250 mg/day	No	No	<250 mg/day	No	Yes	Yes	Yes	Yes
		walk			0	0	03_003	Visit 4	Yes	11	72	13FEB16	0 (not at all) (if 0, skip questions 2 and 3)		No	No	< 30 minutes / day	Moderate	Week 12	03	Entered	25	Male	24NOV15	121	MF4637	<250 mg/day	No	No	<250 mg/day	No	Yes	Yes	Yes	Yes
		walk			0	0	03_003	Visit 4	Yes	11	73	14FEB16	0 (not at all) (if 0, skip questions 2 and 3)		No	No	< 30 minutes / day	Moderate	Week 12	03	Entered	25	Male	24NOV15	121	MF4637	<250 mg/day	No	No	<250 mg/day	No	Yes	Yes	Yes	Yes
		walk			0	0	03_003	Visit 4	Yes	11	74	15FEB16	0 (not at all) (if 0, skip questions 2 and 3)		No	No	< 30 minutes / day	Moderate	Week 12	03	Entered	25	Male	24NOV15	121	MF4637	<250 mg/day	No	No	<250 mg/day	No	Yes	Yes	Yes	Yes
		walk			0	0	03_003	Visit 4	Yes	11	75	16FEB16	0 (not at all) (if 0, skip questions 2 and 3)		No	No	< 30 minutes / day	Moderate	Week 12	03	Entered	25	Male	24NOV15	121	MF4637	<250 mg/day	No	No	<250 mg/day	No	Yes	Yes	Yes	Yes
		walk			0	0	03_003	Visit 4	Yes	11	76	17FEB16	0 (not at all) (if 0, skip questions 2 and 3)		No	No	< 30 minutes / day	Moderate	Week 12	03	Entered	25	Male	24NOV15	121	MF4637	<250 mg/day	No	No	<250 mg/day	No	Yes	Yes	Yes	Yes
		Hiking and free weightlifting			none	none	03_003	Visit 4	Yes	12	77	11FEB16	0 (not at all) (if 0, skip questions 2 and 3)		No	No	30 or more minutes / day	Moderate	Week 12	03	Entered	25	Male	24NOV15	121	MF4637	<250 mg/day	No	No	<250 mg/day	No	Yes	Yes	Yes	Yes
		Hiking and free weightlifting			none	none	03_003	Visit 4	Yes	12	78	12FEB16	0 (not at all) (if 0, skip questions 2 and 3)		No	No	30 or more minutes / day	Moderate	Week 12	03	Entered	25	Male	24NOV15	121	MF4637	<250 mg/day	No	No	<250 mg/day	No	Yes	Yes	Yes	Yes
		Hiking and free weightlifting			none	none	03_003	Visit 4	Yes	12	79	13FEB16	0 (not at all) (if 0, skip questions 2 and 3)		No	No	30 or more minutes / day	Moderate	Week 12	03	Entered	25	Male	24NOV15	121	MF4637	<250 mg/day	No	No	<250 mg/day	No	Yes	Yes	Yes	Yes
		Hiking and free weightlifting			none	none	03_003	Visit 4	Yes	12	80	14FEB16	0 (not at all) (if 0, skip questions 2 and 3)		No	No	30 or more minutes / day	Moderate	Week 12	03	Entered	25	Male	24NOV15	121	MF4637	<250 mg/day	No	No	<250 mg/day	No	Yes	Yes	Yes	Yes
		Hiking and free weightlifting	I missed a dose for the morning was not able to eat breakfast. Rough day.		none	none	03_003	Visit 4	No	12	81	15FEB16	0 (not at all) (if 0, skip questions 2 and 3)		No	No	30 or more minutes / day	Moderate	Week 12	03	Entered	25	Male	24NOV15	121	MF4637	<250 mg/day	No	No	<250 mg/day	No	Yes	Yes	Yes	Yes
		Hiking and free weightlifting			none	none	03_003	Visit 4	Yes	12	82	16FEB16	0 (not at all) (if 0, skip questions 2 and 3)		No	No	30 or more minutes / day	Moderate	Week 12	03	Entered	25	Male	24NOV15	121	MF4637	<250 mg/day	No	No	<250 mg/day	No	Yes	Yes	Yes	Yes
		Hiking and free weightlifting			none	none	03_003	Visit 4	Yes	12	83	17FEB16	0 (not at all) (if 0, skip questions 2 and 3)		No	No	30 or more minutes / day	Moderate	Week 12	03	Entered	25	Male	24NOV15	121	MF4637	<250 mg/day	No	No	<250 mg/day	No	Yes	Yes	Yes	Yes
					0	0	03_003	Visit 5	Yes	13	84	03MAR16	0 (not at all) (if 0, skip questions 2 and 3)		No	No	0 minutes (no exercise) / day		Week 24	03	Entered	25	Male	24NOV15	121	MF4637	<250 mg/day	No	No	<250 mg/day	No	Yes	Yes	Yes	Yes
					0	0	03_003	Visit 5	Yes	13	85	04MAR16	0 (not at all) (if 0, skip questions 2 and 3)		No	No	0 minutes (no exercise) / day		Week 24	03	Entered	25	Male	24NOV15	121	MF4637	<250 mg/day	No	No	<250 mg/day	No	Yes	Yes	Yes	Yes
					0	0	03_003	Visit 5	Yes	13	86	05MAR16	0 (not at all) (if 0, skip questions 2 and 3)		No	No	0 minutes (no exercise) / day		Week 24	03	Entered	25	Male	24NOV15	121	MF4637	<250 mg/day	No	No	<250 mg/day	No	Yes	Yes	Yes	Yes
					0	0	03_003	Visit 5	Yes	13	87	06MAR16	0 (not at all) (if 0, skip questions 2 and 3)		No	No	0 minutes (no exercise) / day		Week 24	03	Entered	25	Male	24NOV15	121	MF4637	<250 mg/day	No	No	<250 mg/day	No	Yes	Yes	Yes	Yes
					0	0	03_003	Visit 5	Yes	13	88	07MAR16	0 (not at all) (if 0, skip questions 2 and 3)		No	No	0 minutes (no exercise) / day		Week 24	03	Entered	25	Male	24NOV15	121	MF4637	<250 mg/day	No	No	<250 mg/day	No	Yes	Yes	Yes	Yes
					0	0	03_003	Visit 5	Yes	13	89	08MAR16	0 (not at all) (if 0, skip questions 2 and 3)		No	No	0 minutes (no exercise) / day		Week 24	03	Entered	25	Male	24NOV15	121	MF4637	<250 mg/day	No	No	<250 mg/day	No	Yes	Yes	Yes	Yes
					0	0	03_003	Visit 5	Yes	13	90	09MAR16	0 (not at all) (if 0, skip questions 2 and 3)		No	No	0 minutes (no exercise) / day		Week 24	03	Entered	25	Male	24NOV15	121	MF4637	<250 mg/day	No	No	<250 mg/day	No	Yes	Yes	Yes	Yes
					0	0	03_003	Visit 5	Yes	14	91	10MAR16	0 (not at all) (if 0, skip questions 2 and 3)		No	No	0 minutes (no exercise) / day		Week 24	03	Entered	25	Male	24NOV15	121	MF4637	<250 mg/day	No	No	<250 mg/day	No	Yes	Yes	Yes	Yes
					0	0	03_003	Visit 5	Yes	14	92	11MAR16	0 (not at all) (if 0, skip questions 2 and 3)		No	No	0 minutes (no exercise) / day		Week 24	03	Entered	25	Male	24NOV15	121	MF4637	<250 mg/day	No	No	<250 mg/day	No	Yes	Yes	Yes	Yes
					0	0	03_003	Visit 5	Yes	14	93	12MAR16	0 (not at all) (if 0, skip questions 2 and 3)		No	No	0 minutes (no exercise) / day		Week 24	03	Entered	25	Male	24NOV15	121	MF4637	<250 mg/day	No	No	<250 mg/day	No	Yes	Yes	Yes	Yes
					0	0	03_003	Visit 5	Yes	14	94	13MAR16	0 (not at all) (if 0, skip questions 2 and 3)		No	No	0 minutes (no exercise) / day		Week 24	03	Entered	25	Male	24NOV15	121	MF4637	<250 mg/day	No	No	<250 mg/day	No	Yes	Yes	Yes	Yes
					0	0	03_003	Visit 5	Yes	14	95	14MAR16	0 (not at all) (if 0, skip questions 2 and 3)		No	No	0 minutes (no exercise) / day		Week 24	03	Entered	25	Male	24NOV15	121	MF4637	<250 mg/day	No	No	<250 mg/day	No	Yes	Yes	Yes	Yes
					0	0	03_003	Visit 5	Yes	14	96	15MAR16	0 (not at all) (if 0, skip questions 2 and 3)		No	No	0 minutes (no exercise) / day		Week 24	03	Entered	25	Male	24NOV15	121	MF4637	<250 mg/day	No	No	<250 mg/day	No	Yes	Yes	Yes	Yes
					0	0	03_003	Visit 5	Yes	14	97	16MAR16	0 (not at all) (if 0, skip questions 2 and 3)		No	No	0 minutes (no exercise) / day		Week 24	03	Entered	25	Male	24NOV15	121	MF4637	<250 mg/day	No	No	<250 mg/day	No	Yes	Yes	Yes	Yes
					0	0	03_003	Visit 5	Yes	15	98	17MAR16	0 (not at all) (if 0, skip questions 2 and 3)		No	No	0 minutes (no exercise) / day		Week 24	03	Entered	25	Male	24NOV15	121	MF4637	<250 mg/day	No	No	<250 mg/day	No	Yes	Yes	Yes	Yes
					0	0	03_003	Visit 5	Yes	15	99	18MAR16	0 (not at all) (if 0, skip questions 2 and 3)		No	No	0 minutes (no exercise) / day		Week 24	03	Entered	25	Male	24NOV15	121	MF4637	<250 mg/day	No	No	<250 mg/day	No	Yes	Yes	Yes	Yes
					0	0	03_003	Visit 5	Yes	15	100	19MAR16	0 (not at all) (if 0, skip questions 2 and 3)		No	No	0 minutes (no exercise) / day		Week 24	03	Entered	25	Male	24NOV15	121	MF4637	<250 mg/day	No	No	<250 mg/day	No	Yes	Yes	Yes	Yes
					0	0	03_003	Visit 5	Yes	15	101	20MAR16	0 (not at all) (if 0, skip questions 2 and 3)		No	No	0 minutes (no exercise) / day		Week 24	03	Entered	25	Male	24NOV15	121	MF4637	<250 mg/day	No	No	<250 mg/day	No	Yes	Yes	Yes	Yes
					0	0	03_003	Visit 5	Yes	15	102	21MAR16	0 (not at all) (if 0, skip questions 2 and 3)		No	No	0 minutes (no exercise) / day		Week 24	03	Entered	25	Male	24NOV15	121	MF4637	<250 mg/day	No	No	<250 mg/day	No	Yes	Yes	Yes	Yes
					0	0	03_003	Visit 5	Yes	15	103	22MAR16	0 (not at all) (if 0, skip questions 2 and 3)		No	No	0 minutes (no exercise) / day		Week 24	03	Entered	25	Male	24NOV15	121	MF4637	<250 mg/day	No	No	<250 mg/day	No	Yes	Yes	Yes	Yes
					0	0	03_003	Visit 5	Yes	15	104	23MAR16	0 (not at all) (if 0, skip questions 2 and 3)		No	No	0 minutes (no exercise) / day		Week 24	03	Entered	25	Male	24NOV15	121	MF4637	<250 mg/day	No	No	<250 mg/day	No	Yes	Yes	Yes	Yes
					0	0	03_003	Visit 5	Yes	16	105	24MAR16	0 (not at all) (if 0, skip questions 2 and 3)		No	No	0 minutes (no exercise) / day		Week 24	03	Entered	25	Male	24NOV15	121	MF4637	<250 mg/day	No	No	<250 mg/day	No	Yes	Yes	Yes	Yes
					0	0	03_003	Visit 5	Yes	16	106	25MAR16	0 (not at all) (if 0, skip questions 2 and 3)		No	No	0 minutes (no exercise) / day		Week 24	03	Entered	25	Male	24NOV15	121	MF4637	<250 mg/day	No	No	<250 mg/day	No	Yes	Yes	Yes	Yes
					0	0	03_003	Visit 5	Yes	16	107	26MAR16	0 (not at all) (if 0, skip questions 2 and 3)		No	No	0 minutes (no exercise) / day		Week 24	03	Entered	25	Male	24NOV15	121	MF4637	<250 mg/day	No	No	<250 mg/day	No	Yes	Yes	Yes	Yes
					0	0	03_003	Visit 5	Yes	16	108	27MAR16	0 (not at all) (if 0, skip questions 2 and 3)		No	No	0 minutes (no exercise) / day		Week 24	03	Entered	25	Male	24NOV15	121	MF4637	<250 mg/day	No	No	<250 mg/day	No	Yes	Yes	Yes	Yes
					0	0	03_003	Visit 5	Yes	16	109	28MAR16	0 (not at all) (if 0, skip questions 2 and 3)		No	No	0 minutes (no exercise) / day		Week 24	03	Entered	25	Male	24NOV15	121	MF4637	<250 mg/day	No	No	<250 mg/day	No	Yes	Yes	Yes	Yes
					0	0	03_003	Visit 5	Yes	16	110	29MAR16	0 (not at all) (if 0, skip questions 2 and 3)		No	No	0 minutes (no exercise) / day		Week 24	03	Entered	25	Male	24NOV15	121	MF4637	<250 mg/day	No	No	<250 mg/day	No	Yes	Yes	Yes	Yes
					0	0	03_003	Visit 5	Yes	16	111	30MAR16	0 (not at all) (if 0, skip questions 2 and 3)		No	No	0 minutes (no exercise) / day		Week 24	03	Entered	25	Male	24NOV15	121	MF4637	<250 mg/day	No	No	<250 mg/day	No	Yes	Yes	Yes	Yes
					0	0	03_003	Visit 5	Yes	17	112	31MAR16	0 (not at all) (if 0, skip questions 2 and 3)		No	No	0 minutes (no exercise) / day		Week 24	03	Entered	25	Male	24NOV15	121	MF4637	<250 mg/day	No	No	<250 mg/day	No	Yes	Yes	Yes	Yes
					0	0	03_003	Visit 5	Yes	17	113	01APR16	0 (not at all) (if 0, skip questions 2 and 3)		No	No	0 minutes (no exercise) / day		Week 24	03	Entered	25	Male	24NOV15	121	MF4637	<250 mg/day	No	No	<250 mg/day	No	Yes	Yes	Yes	Yes
					0	0	03_003	Visit 5	Yes	17	114	02APR16	0 (not at all) (if 0, skip questions 2 and 3)		No	No	0 minutes (no exercise) / day		Week 24	03	Entered	25	Male	24NOV15	121	MF4637	<250 mg/day	No	No	<250 mg/day	No	Yes	Yes	Yes	Yes
					0	0	03_003	Visit 5	Yes	17	115	03APR16	0 (not at all) (if 0, skip questions 2 and 3)		No	No	0 minutes (no exercise) / day		Week 24	03	Entered	25	Male	24NOV15	121	MF4637	<250 mg/day	No	No	<250 mg/day	No	Yes	Yes	Yes	Yes
					0	0	03_003	Visit 5	Yes	17	116	04APR16	0 (not at all) (if 0, skip questions 2 and 3)		No	No	0 minutes (no exercise) / day		Week 24	03	Entered	25	Male	24NOV15	121	MF4637	<250 mg/day	No	No	<250 mg/day	No	Yes	Yes	Yes	Yes
					0	0	03_003	Visit 5	Yes	17	117	05APR16	0 (not at all) (if 0, skip questions 2 and 3)		No	No	0 minutes (no exercise) / day		Week 24	03	Entered	25	Male	24NOV15	121	MF4637	<250 mg/day	No	No	<250 mg/day	No	Yes	Yes	Yes	Yes
					0	0	03_003	Visit 5	Yes	17	118	06APR16	0 (not at all) (if 0, skip questions 2 and 3)		No	No	0 minutes (no exercise) / day		Week 24	03	Entered	25	Male	24NOV15	121	MF4637	<250 mg/day	No	No	<250 mg/day	No	Yes	Yes	Yes	Yes
					0	0	03_003	Visit 5	Yes	18	119	07APR16	0 (not at all) (if 0, skip questions 2 and 3)		No	No	0 minutes (no exercise) / day		Week 24	03	Entered	25	Male	24NOV15	121	MF4637	<250 mg/day	No	No	<250 mg/day	No	Yes	Yes	Yes	Yes
					0	0	03_003	Visit 5	Yes	18	120	08APR16	0 (not at all) (if 0, skip questions 2 and 3)		No	No	0 minutes (no exercise) / day		Week 24	03	Entered	25	Male	24NOV15	121	MF4637	<250 mg/day	No	No	<250 mg/day	No	Yes	Yes	Yes	Yes
					0	0	03_003	Visit 5	Yes	18	121	09APR16	0 (not at all) (if 0, skip questions 2 and 3)		No	No	0 minutes (no exercise) / day		Week 24	03	Entered	25	Male	24NOV15	121	MF4637	<250 mg/day	No	No	<250 mg/day	No	Yes	Yes	Yes	Yes
					0	0	03_003	Visit 5	Yes	18	122	10APR16	0 (not at all) (if 0, skip questions 2 and 3)		No	No	0 minutes (no exercise) / day		Week 24	03	Entered	25	Male	24NOV15	121	MF4637	<250 mg/day	No	No	<250 mg/day	No	Yes	Yes	Yes	Yes
					0	0	03_003	Visit 5	Yes	18	123	11APR16	0 (not at all) (if 0, skip questions 2 and 3)		No	No	0 minutes (no exercise) / day		Week 24	03	Entered	25	Male	24NOV15	121	MF4637	<250 mg/day	No	No	<250 mg/day	No	Yes	Yes	Yes	Yes
					0	0	03_003	Visit 5	Yes	18	124	12APR16	0 (not at all) (if 0, skip questions 2 and 3)		No	No	0 minutes (no exercise) / day		Week 24	03	Entered	25	Male	24NOV15	121	MF4637	<250 mg/day	No	No	<250 mg/day	No	Yes	Yes	Yes	Yes
					0	0	03_003	Visit 5	Yes	18	125	13APR16	0 (not at all) (if 0, skip questions 2 and 3)		No	No	0 minutes (no exercise) / day		Week 24	03	Entered	25	Male	24NOV15	121	MF4637	<250 mg/day	No	No	<250 mg/day	No	Yes	Yes	Yes	Yes
					0	0	03_003	Visit 5	Yes	19	126	14APR16	0 (not at all) (if 0, skip questions 2 and 3)		No	No	0 minutes (no exercise) / day		Week 24	03	Entered	25	Male	24NOV15	121	MF4637	<250 mg/day	No	No	<250 mg/day	No	Yes	Yes	Yes	Yes
					0	0	03_003	Visit 5	Yes	19	127	15APR16	0 (not at all) (if 0, skip questions 2 and 3)		No	No	0 minutes (no exercise) / day		Week 24	03	Entered	25	Male	24NOV15	121	MF4637	<250 mg/day	No	No	<250 mg/day	No	Yes	Yes	Yes	Yes
					0	0	03_003	Visit 5	Yes	19	128	16APR16	0 (not at all) (if 0, skip questions 2 and 3)		No	No	0 minutes (no exercise) / day		Week 24	03	Entered	25	Male	24NOV15	121	MF4637	<250 mg/day	No	No	<250 mg/day	No	Yes	Yes	Yes	Yes
					0	0	03_003	Visit 5	Yes	19	129	17APR16	0 (not at all) (if 0, skip questions 2 and 3)		No	No	0 minutes (no exercise) / day		Week 24	03	Entered	25	Male	24NOV15	121	MF4637	<250 mg/day	No	No	<250 mg/day	No	Yes	Yes	Yes	Yes
					0	0	03_003	Visit 5	Yes	19	130	18APR16	0 (not at all) (if 0, skip questions 2 and 3)		No	No	0 minutes (no exercise) / day		Week 24	03	Entered	25	Male	24NOV15	121	MF4637	<250 mg/day	No	No	<250 mg/day	No	Yes	Yes	Yes	Yes
					0	0	03_003	Visit 5	Yes	19	131	19APR16	0 (not at all) (if 0, skip questions 2 and 3)		No	No	0 minutes (no exercise) / day		Week 24	03	Entered	25	Male	24NOV15	121	MF4637	<250 mg/day	No	No	<250 mg/day	No	Yes	Yes	Yes	Yes
					0	0	03_003	Visit 5	Yes	19	132	20APR16	0 (not at all) (if 0, skip questions 2 and 3)		No	No	0 minutes (no exercise) / day		Week 24	03	Entered	25	Male	24NOV15	121	MF4637	<250 mg/day	No	No	<250 mg/day	No	Yes	Yes	Yes	Yes
					0	0	03_003	Visit 5	Yes	20	133	21APR16	0 (not at all) (if 0, skip questions 2 and 3)		No	No	0 minutes (no exercise) / day		Week 24	03	Entered	25	Male	24NOV15	121	MF4637	<250 mg/day	No	No	<250 mg/day	No	Yes	Yes	Yes	Yes
					0	0	03_003	Visit 5	Yes	20	134	22APR16	0 (not at all) (if 0, skip questions 2 and 3)		No	No	0 minutes (no exercise) / day		Week 24	03	Entered	25	Male	24NOV15	121	MF4637	<250 mg/day	No	No	<250 mg/day	No	Yes	Yes	Yes	Yes
					0	0	03_003	Visit 5	Yes	20	135	23APR16	0 (not at all) (if 0, skip questions 2 and 3)		No	No	0 minutes (no exercise) / day		Week 24	03	Entered	25	Male	24NOV15	121	MF4637	<250 mg/day	No	No	<250 mg/day	No	Yes	Yes	Yes	Yes
					0	0	03_003	Visit 5	Yes	20	136	24APR16	0 (not at all) (if 0, skip questions 2 and 3)		No	No	0 minutes (no exercise) / day		Week 24	03	Entered	25	Male	24NOV15	121	MF4637	<250 mg/day	No	No	<250 mg/day	No	Yes	Yes	Yes	Yes
					0	0	03_003	Visit 5	Yes	20	137	25APR16	0 (not at all) (if 0, skip questions 2 and 3)		No	No	0 minutes (no exercise) / day		Week 24	03	Entered	25	Male	24NOV15	121	MF4637	<250 mg/day	No	No	<250 mg/day	No	Yes	Yes	Yes	Yes
					0	0	03_003	Visit 5	Yes	20	138	26APR16	0 (not at all) (if 0, skip questions 2 and 3)		No	No	0 minutes (no exercise) / day		Week 24	03	Entered	25	Male	24NOV15	121	MF4637	<250 mg/day	No	No	<250 mg/day	No	Yes	Yes	Yes	Yes
					0	0	03_003	Visit 5	Yes	20	139	27APR16	0 (not at all) (if 0, skip questions 2 and 3)		No	No	0 minutes (no exercise) / day		Week 24	03	Entered	25	Male	24NOV15	121	MF4637	<250 mg/day	No	No	<250 mg/day	No	Yes	Yes	Yes	Yes
					0	0	03_003	Visit 5	Yes	21	140	28APR16	0 (not at all) (if 0, skip questions 2 and 3)		No	No	0 minutes (no exercise) / day		Week 24	03	Entered	25	Male	24NOV15	121	MF4637	<250 mg/day	No	No	<250 mg/day	No	Yes	Yes	Yes	Yes
					0	0	03_003	Visit 5	Yes	21	141	29APR16	0 (not at all) (if 0, skip questions 2 and 3)		No	No	0 minutes (no exercise) / day		Week 24	03	Entered	25	Male	24NOV15	121	MF4637	<250 mg/day	No	No	<250 mg/day	No	Yes	Yes	Yes	Yes
					0	0	03_003	Visit 5	Yes	21	142	30APR16	0 (not at all) (if 0, skip questions 2 and 3)		No	No	0 minutes (no exercise) / day		Week 24	03	Entered	25	Male	24NOV15	121	MF4637	<250 mg/day	No	No	<250 mg/day	No	Yes	Yes	Yes	Yes
					0	0	03_003	Visit 5	Yes	21	143	01MAY16	0 (not at all) (if 0, skip questions 2 and 3)		No	No	0 minutes (no exercise) / day		Week 24	03	Entered	25	Male	24NOV15	121	MF4637	<250 mg/day	No	No	<250 mg/day	No	Yes	Yes	Yes	Yes
					0	0	03_003	Visit 5	Yes	21	144	02MAY16	0 (not at all) (if 0, skip questions 2 and 3)		No	No	0 minutes (no exercise) / day		Week 24	03	Entered	25	Male	24NOV15	121	MF4637	<250 mg/day	No	No	<250 mg/day	No	Yes	Yes	Yes	Yes
					0	0	03_003	Visit 5	Yes	21	145	03MAY16	0 (not at all) (if 0, skip questions 2 and 3)		No	No	0 minutes (no exercise) / day		Week 24	03	Entered	25	Male	24NOV15	121	MF4637	<250 mg/day	No	No	<250 mg/day	No	Yes	Yes	Yes	Yes
					0	0	03_003	Visit 5	Yes	21	146	04MAY16	0 (not at all) (if 0, skip questions 2 and 3)		No	No	0 minutes (no exercise) / day		Week 24	03	Entered	25	Male	24NOV15	121	MF4637	<250 mg/day	No	No	<250 mg/day	No	Yes	Yes	Yes	Yes
					0	0	03_003	Visit 5	Yes	22	147	05MAY16	0 (not at all) (if 0, skip questions 2 and 3)		No	No	0 minutes (no exercise) / day		Week 24	03	Entered	25	Male	24NOV15	121	MF4637	<250 mg/day	No	No	<250 mg/day	No	Yes	Yes	Yes	Yes
					0	0	03_003	Visit 5	Yes	22	148	06MAY16	0 (not at all) (if 0, skip questions 2 and 3)		No	No	0 minutes (no exercise) / day		Week 24	03	Entered	25	Male	24NOV15	121	MF4637	<250 mg/day	No	No	<250 mg/day	No	Yes	Yes	Yes	Yes
					0	0	03_003	Visit 5	Yes	22	149	07MAY16	0 (not at all) (if 0, skip questions 2 and 3)		No	No	0 minutes (no exercise) / day		Week 24	03	Entered	25	Male	24NOV15	121	MF4637	<250 mg/day	No	No	<250 mg/day	No	Yes	Yes	Yes	Yes
					0	0	03_003	Visit 5	Yes	22	150	08MAY16	0 (not at all) (if 0, skip questions 2 and 3)		No	No	0 minutes (no exercise) / day		Week 24	03	Entered	25	Male	24NOV15	121	MF4637	<250 mg/day	No	No	<250 mg/day	No	Yes	Yes	Yes	Yes
					0	0	03_003	Visit 5	Yes	22	151	09MAY16	0 (not at all) (if 0, skip questions 2 and 3)		No	No	0 minutes (no exercise) / day		Week 24	03	Entered	25	Male	24NOV15	121	MF4637	<250 mg/day	No	No	<250 mg/day	No	Yes	Yes	Yes	Yes
					0	0	03_003	Visit 5	Yes	22	152	10MAY16	0 (not at all) (if 0, skip questions 2 and 3)		No	No	0 minutes (no exercise) / day		Week 24	03	Entered	25	Male	24NOV15	121	MF4637	<250 mg/day	No	No	<250 mg/day	No	Yes	Yes	Yes	Yes
					0	0	03_003	Visit 5	Yes	22	153	11MAY16	0 (not at all) (if 0, skip questions 2 and 3)		No	No	0 minutes (no exercise) / day		Week 24	03	Entered	25	Male	24NOV15	121	MF4637	<250 mg/day	No	No	<250 mg/day	No	Yes	Yes	Yes	Yes
					0	0	03_003	Visit 5	Yes	23	154	12MAY16	0 (not at all) (if 0, skip questions 2 and 3)		No	No	0 minutes (no exercise) / day		Week 24	03	Entered	25	Male	24NOV15	121	MF4637	<250 mg/day	No	No	<250 mg/day	No	Yes	Yes	Yes	Yes
					0	0	03_003	Visit 5	Yes	23	155	13MAY16	0 (not at all) (if 0, skip questions 2 and 3)		No	No	0 minutes (no exercise) / day		Week 24	03	Entered	25	Male	24NOV15	121	MF4637	<250 mg/day	No	No	<250 mg/day	No	Yes	Yes	Yes	Yes
					0	0	03_003	Visit 5	Yes	23	156	14MAY16	0 (not at all) (if 0, skip questions 2 and 3)		No	No	0 minutes (no exercise) / day		Week 24	03	Entered	25	Male	24NOV15	121	MF4637	<250 mg/day	No	No	<250 mg/day	No	Yes	Yes	Yes	Yes
					0	0	03_003	Visit 5	Yes	23	157	15MAY16	0 (not at all) (if 0, skip questions 2 and 3)		No	No	0 minutes (no exercise) / day		Week 24	03	Entered	25	Male	24NOV15	121	MF4637	<250 mg/day	No	No	<250 mg/day	No	Yes	Yes	Yes	Yes
					0	0	03_003	Visit 5	Yes	23	158	16MAY16	0 (not at all) (if 0, skip questions 2 and 3)		No	No	0 minutes (no exercise) / day		Week 24	03	Entered	25	Male	24NOV15	121	MF4637	<250 mg/day	No	No	<250 mg/day	No	Yes	Yes	Yes	Yes
					0	0	03_003	Visit 5	Yes	23	159	17MAY16	0 (not at all) (if 0, skip questions 2 and 3)		No	No	0 minutes (no exercise) / day		Week 24	03	Entered	25	Male	24NOV15	121	MF4637	<250 mg/day	No	No	<250 mg/day	No	Yes	Yes	Yes	Yes
					0	0	03_003	Visit 5	Yes	23	160	18MAY16	0 (not at all) (if 0, skip questions 2 and 3)		No	No	0 minutes (no exercise) / day		Week 24	03	Entered	25	Male	24NOV15	121	MF4637	<250 mg/day	No	No	<250 mg/day	No	Yes	Yes	Yes	Yes
					0	0	03_003	Visit 5	Yes	24	161	19MAY16	0 (not at all) (if 0, skip questions 2 and 3)		No	No	0 minutes (no exercise) / day		Week 24	03	Entered	25	Male	24NOV15	121	MF4637	<250 mg/day	No	No	<250 mg/day	No	Yes	Yes	Yes	Yes
					0	0	03_003	Visit 5	Yes	24	162	20MAY16	0 (not at all) (if 0, skip questions 2 and 3)		No	No	0 minutes (no exercise) / day		Week 24	03	Entered	25	Male	24NOV15	121	MF4637	<250 mg/day	No	No	<250 mg/day	No	Yes	Yes	Yes	Yes
					0	0	03_003	Visit 5	Yes	24	163	21MAY16	0 (not at all) (if 0, skip questions 2 and 3)		No	No	0 minutes (no exercise) / day		Week 24	03	Entered	25	Male	24NOV15	121	MF4637	<250 mg/day	No	No	<250 mg/day	No	Yes	Yes	Yes	Yes
					0	0	03_003	Visit 5	Yes	24	164	22MAY16	0 (not at all) (if 0, skip questions 2 and 3)		No	No	0 minutes (no exercise) / day		Week 24	03	Entered	25	Male	24NOV15	121	MF4637	<250 mg/day	No	No	<250 mg/day	No	Yes	Yes	Yes	Yes
					0	0	03_003	Visit 5	Yes	24	165	23MAY16	0 (not at all) (if 0, skip questions 2 and 3)		No	No	0 minutes (no exercise) / day		Week 24	03	Entered	25	Male	24NOV15	121	MF4637	<250 mg/day	No	No	<250 mg/day	No	Yes	Yes	Yes	Yes
					0	0	03_003	Visit 5	Yes	24	166	24MAY16	0 (not at all) (if 0, skip questions 2 and 3)		No	No	0 minutes (no exercise) / day		Week 24	03	Entered	25	Male	24NOV15	121	MF4637	<250 mg/day	No	No	<250 mg/day	No	Yes	Yes	Yes	Yes
					0	0	03_003	Visit 5	Yes	24	167	25MAY16	0 (not at all) (if 0, skip questions 2 and 3)		No	No	0 minutes (no exercise) / day		Week 24	03	Entered	25	Male	24NOV15	121	MF4637	<250 mg/day	No	No	<250 mg/day	No	Yes	Yes	Yes	Yes
							03_003	Visit 5	Yes	25	168	26MAY16							Week 24	03	Entered	25	Male	24NOV15	121	MF4637	<250 mg/day	No	No	<250 mg/day	No	Yes	Yes	Yes	Yes
							03_003	Visit 5	Yes	25	169	27MAY16							Week 24	03	Entered	25	Male	24NOV15	121	MF4637	<250 mg/day	No	No	<250 mg/day	No	Yes	Yes	Yes	Yes
							03_003	Visit 5	Yes	25	170	28MAY16							Week 24	03	Entered	25	Male	24NOV15	121	MF4637	<250 mg/day	No	No	<250 mg/day	No	Yes	Yes	Yes	Yes
							03_003	Visit 5	Yes	25	171	29MAY16							Week 24	03	Entered	25	Male	24NOV15	121	MF4637	<250 mg/day	No	No	<250 mg/day	No	Yes	Yes	Yes	Yes
							03_003	Visit 5	Yes	25	172	30MAY16							Week 24	03	Entered	25	Male	24NOV15	121	MF4637	<250 mg/day	No	No	<250 mg/day	No	Yes	Yes	Yes	Yes
			06/01/2016				03_003	Visit 5	Yes	25	173	31MAY16							Week 24	03	Entered	25	Male	24NOV15	121	MF4637	<250 mg/day	No	No	<250 mg/day	No	Yes	Yes	Yes	Yes
		Walking			Three times	Nuts 3 or 4 times	03_004	Visit 3	No	1	0	22NOV15	0 (not at all) (if 0, skip questions 2 and 3)		No	No	< 30 minutes / day	Light	Week 6	03	Entered	56	Female	24NOV15	118	Placebo	<250 mg/day	No	No	>=250 mg/day	No	Yes	Yes	Yes	Yes
		Walking			Three times	Nuts 3 or 4 times	03_004	Visit 3	Yes	1	1	23NOV15	0 (not at all) (if 0, skip questions 2 and 3)		No	No	< 30 minutes / day	Light	Week 6	03	Entered	56	Female	24NOV15	118	Placebo	<250 mg/day	No	No	>=250 mg/day	No	Yes	Yes	Yes	Yes
		Walking			Three times	Nuts 3 or 4 times	03_004	Visit 3	Yes	1	2	24NOV15	0 (not at all) (if 0, skip questions 2 and 3)		No	No	< 30 minutes / day	Light	Week 6	03	Entered	56	Female	24NOV15	118	Placebo	<250 mg/day	No	No	>=250 mg/day	No	Yes	Yes	Yes	Yes
		Walking			Three times	Nuts 3 or 4 times	03_004	Visit 3	Yes	1	3	25NOV15	0 (not at all) (if 0, skip questions 2 and 3)		No	No	< 30 minutes / day	Light	Week 6	03	Entered	56	Female	24NOV15	118	Placebo	<250 mg/day	No	No	>=250 mg/day	No	Yes	Yes	Yes	Yes
		Walking			Three times	Nuts 3 or 4 times	03_004	Visit 3	Yes	1	4	26NOV15	0 (not at all) (if 0, skip questions 2 and 3)		No	No	< 30 minutes / day	Light	Week 6	03	Entered	56	Female	24NOV15	118	Placebo	<250 mg/day	No	No	>=250 mg/day	No	Yes	Yes	Yes	Yes
		Walking			Three times	Nuts 3 or 4 times	03_004	Visit 3	Yes	1	5	27NOV15	0 (not at all) (if 0, skip questions 2 and 3)		No	No	< 30 minutes / day	Light	Week 6	03	Entered	56	Female	24NOV15	118	Placebo	<250 mg/day	No	No	>=250 mg/day	No	Yes	Yes	Yes	Yes
		Walking			Three times	Nuts 3 or 4 times	03_004	Visit 3	Yes	1	6	28NOV15	0 (not at all) (if 0, skip questions 2 and 3)		No	No	< 30 minutes / day	Light	Week 6	03	Entered	56	Female	24NOV15	118	Placebo	<250 mg/day	No	No	>=250 mg/day	No	Yes	Yes	Yes	Yes
		Walking			Twice	None	03_004	Visit 3	Yes	2	7	27NOV15	0 (not at all) (if 0, skip questions 2 and 3)		No	No	< 30 minutes / day	Light	Week 6	03	Entered	56	Female	24NOV15	118	Placebo	<250 mg/day	No	No	>=250 mg/day	No	Yes	Yes	Yes	Yes
		Walking			Twice	None	03_004	Visit 3	Yes	2	8	28NOV15	0 (not at all) (if 0, skip questions 2 and 3)		No	No	< 30 minutes / day	Light	Week 6	03	Entered	56	Female	24NOV15	118	Placebo	<250 mg/day	No	No	>=250 mg/day	No	Yes	Yes	Yes	Yes
		Walking	Didn't eat breakfast		Twice	None	03_004	Visit 3	No	2	9	29NOV15	0 (not at all) (if 0, skip questions 2 and 3)		No	No	< 30 minutes / day	Light	Week 6	03	Entered	56	Female	24NOV15	118	Placebo	<250 mg/day	No	No	>=250 mg/day	No	Yes	Yes	Yes	Yes
		Walking			Twice	None	03_004	Visit 3	Yes	2	10	30NOV15	0 (not at all) (if 0, skip questions 2 and 3)		No	No	< 30 minutes / day	Light	Week 6	03	Entered	56	Female	24NOV15	118	Placebo	<250 mg/day	No	No	>=250 mg/day	No	Yes	Yes	Yes	Yes
		Walking			Twice	None	03_004	Visit 3	Yes	2	11	01DEC15	0 (not at all) (if 0, skip questions 2 and 3)		No	No	< 30 minutes / day	Light	Week 6	03	Entered	56	Female	24NOV15	118	Placebo	<250 mg/day	No	No	>=250 mg/day	No	Yes	Yes	Yes	Yes
		Walking			Twice	None	03_004	Visit 3	Yes	2	12	02DEC15	0 (not at all) (if 0, skip questions 2 and 3)		No	No	< 30 minutes / day	Light	Week 6	03	Entered	56	Female	24NOV15	118	Placebo	<250 mg/day	No	No	>=250 mg/day	No	Yes	Yes	Yes	Yes
		Walking			Twice	None	03_004	Visit 3	Yes	2	13	03DEC15	0 (not at all) (if 0, skip questions 2 and 3)		No	No	< 30 minutes / day	Light	Week 6	03	Entered	56	Female	24NOV15	118	Placebo	<250 mg/day	No	No	>=250 mg/day	No	Yes	Yes	Yes	Yes
		Walking			None	Pistachios twice	03_004	Visit 3	Yes	3	14	11DEC15	0 (not at all) (if 0, skip questions 2 and 3)		No	No	< 30 minutes / day	Light	Week 6	03	Entered	56	Female	24NOV15	118	Placebo	<250 mg/day	No	No	>=250 mg/day	No	Yes	Yes	Yes	Yes
		Walking			None	Pistachios twice	03_004	Visit 3	Yes	3	15	12DEC15	0 (not at all) (if 0, skip questions 2 and 3)		No	No	< 30 minutes / day	Light	Week 6	03	Entered	56	Female	24NOV15	118	Placebo	<250 mg/day	No	No	>=250 mg/day	No	Yes	Yes	Yes	Yes
		Walking			None	Pistachios twice	03_004	Visit 3	Yes	3	16	13DEC15	0 (not at all) (if 0, skip questions 2 and 3)		No	No	< 30 minutes / day	Light	Week 6	03	Entered	56	Female	24NOV15	118	Placebo	<250 mg/day	No	No	>=250 mg/day	No	Yes	Yes	Yes	Yes
		Walking			None	Pistachios twice	03_004	Visit 3	Yes	3	17	14DEC15	0 (not at all) (if 0, skip questions 2 and 3)		No	No	< 30 minutes / day	Light	Week 6	03	Entered	56	Female	24NOV15	118	Placebo	<250 mg/day	No	No	>=250 mg/day	No	Yes	Yes	Yes	Yes
		Walking			None	Pistachios twice	03_004	Visit 3	Yes	3	18	15DEC15	0 (not at all) (if 0, skip questions 2 and 3)		No	No	< 30 minutes / day	Light	Week 6	03	Entered	56	Female	24NOV15	118	Placebo	<250 mg/day	No	No	>=250 mg/day	No	Yes	Yes	Yes	Yes
		Walking			None	Pistachios twice	03_004	Visit 3	Yes	3	19	16DEC15	0 (not at all) (if 0, skip questions 2 and 3)		No	No	< 30 minutes / day	Light	Week 6	03	Entered	56	Female	24NOV15	118	Placebo	<250 mg/day	No	No	>=250 mg/day	No	Yes	Yes	Yes	Yes
		Walking			None	Pistachios twice	03_004	Visit 3	Yes	3	20	17DEC15	0 (not at all) (if 0, skip questions 2 and 3)		No	No	< 30 minutes / day	Light	Week 6	03	Entered	56	Female	24NOV15	118	Placebo	<250 mg/day	No	No	>=250 mg/day	No	Yes	Yes	Yes	Yes
		Walking			Twice	Thrice	03_004	Visit 3	Yes	4	21	15DEC15	0 (not at all) (if 0, skip questions 2 and 3)		No	No	< 30 minutes / day	Light	Week 6	03	Entered	56	Female	24NOV15	118	Placebo	<250 mg/day	No	No	>=250 mg/day	No	Yes	Yes	Yes	Yes
		Walking			Twice	Thrice	03_004	Visit 3	Yes	4	22	16DEC15	0 (not at all) (if 0, skip questions 2 and 3)		No	No	< 30 minutes / day	Light	Week 6	03	Entered	56	Female	24NOV15	118	Placebo	<250 mg/day	No	No	>=250 mg/day	No	Yes	Yes	Yes	Yes
		Walking			Twice	Thrice	03_004	Visit 3	Yes	4	23	17DEC15	0 (not at all) (if 0, skip questions 2 and 3)		No	No	< 30 minutes / day	Light	Week 6	03	Entered	56	Female	24NOV15	118	Placebo	<250 mg/day	No	No	>=250 mg/day	No	Yes	Yes	Yes	Yes
		Walking			Twice	Thrice	03_004	Visit 3	Yes	4	24	18DEC15	0 (not at all) (if 0, skip questions 2 and 3)		No	No	< 30 minutes / day	Light	Week 6	03	Entered	56	Female	24NOV15	118	Placebo	<250 mg/day	No	No	>=250 mg/day	No	Yes	Yes	Yes	Yes
		Walking			Twice	Thrice	03_004	Visit 3	Yes	4	25	19DEC15	0 (not at all) (if 0, skip questions 2 and 3)		No	No	< 30 minutes / day	Light	Week 6	03	Entered	56	Female	24NOV15	118	Placebo	<250 mg/day	No	No	>=250 mg/day	No	Yes	Yes	Yes	Yes
		Walking			Twice	Thrice	03_004	Visit 3	Yes	4	26	20DEC15	0 (not at all) (if 0, skip questions 2 and 3)		No	No	< 30 minutes / day	Light	Week 6	03	Entered	56	Female	24NOV15	118	Placebo	<250 mg/day	No	No	>=250 mg/day	No	Yes	Yes	Yes	Yes
		Walking			Twice	Thrice	03_004	Visit 3	Yes	4	27	21DEC15	0 (not at all) (if 0, skip questions 2 and 3)		No	No	< 30 minutes / day	Light	Week 6	03	Entered	56	Female	24NOV15	118	Placebo	<250 mg/day	No	No	>=250 mg/day	No	Yes	Yes	Yes	Yes
		Walking		Longjohn Silvers (fried). Boiled shrimp.	Three times	None	03_004	Visit 3	Yes	5	28	21DEC15	2 times	2 to 7 ounces or about 1 fillet or 4-14 pieces of sushi	No	No	< 30 minutes / day	Light	Week 6	03	Entered	56	Female	24NOV15	118	Placebo	<250 mg/day	No	No	>=250 mg/day	No	Yes	Yes	Yes	Yes
		Walking		Longjohn Silvers (fried). Boiled shrimp.	Three times	None	03_004	Visit 3	Yes	5	29	22DEC15	2 times	2 to 7 ounces or about 1 fillet or 4-14 pieces of sushi	No	No	< 30 minutes / day	Light	Week 6	03	Entered	56	Female	24NOV15	118	Placebo	<250 mg/day	No	No	>=250 mg/day	No	Yes	Yes	Yes	Yes
		Walking		Longjohn Silvers (fried). Boiled shrimp.	Three times	None	03_004	Visit 3	Yes	5	30	23DEC15	2 times	2 to 7 ounces or about 1 fillet or 4-14 pieces of sushi	No	No	< 30 minutes / day	Light	Week 6	03	Entered	56	Female	24NOV15	118	Placebo	<250 mg/day	No	No	>=250 mg/day	No	Yes	Yes	Yes	Yes
		Walking	Fried fish	Longjohn Silvers (fried). Boiled shrimp.	Three times	None	03_004	Visit 3	Yes	5	31	24DEC15	2 times	2 to 7 ounces or about 1 fillet or 4-14 pieces of sushi	No	No	< 30 minutes / day	Light	Week 6	03	Entered	56	Female	24NOV15	118	Placebo	<250 mg/day	No	No	>=250 mg/day	No	Yes	Yes	Yes	Yes
		Walking	Only ate once	Longjohn Silvers (fried). Boiled shrimp.	Three times	None	03_004	Visit 3	No	5	32	25DEC15	2 times	2 to 7 ounces or about 1 fillet or 4-14 pieces of sushi	No	No	< 30 minutes / day	Light	Week 6	03	Entered	56	Female	24NOV15	118	Placebo	<250 mg/day	No	No	>=250 mg/day	No	Yes	Yes	Yes	Yes
		Walking	Only ate twice fried	Longjohn Silvers (fried). Boiled shrimp.	Three times	None	03_004	Visit 3	No	5	33	26DEC15	2 times	2 to 7 ounces or about 1 fillet or 4-14 pieces of sushi	No	No	< 30 minutes / day	Light	Week 6	03	Entered	56	Female	24NOV15	118	Placebo	<250 mg/day	No	No	>=250 mg/day	No	Yes	Yes	Yes	Yes
		Walking	Shrimp	Longjohn Silvers (fried). Boiled shrimp.	Three times	None	03_004	Visit 3	Yes	5	34	27DEC15	2 times	2 to 7 ounces or about 1 fillet or 4-14 pieces of sushi	No	No	< 30 minutes / day	Light	Week 6	03	Entered	56	Female	24NOV15	118	Placebo	<250 mg/day	No	No	>=250 mg/day	No	Yes	Yes	Yes	Yes
		Walking	Boiled shrimp	Boiled shrimp	3 times	Twice	03_004	Visit 3	Yes	6	35	28DEC15	1 time	2 to 7 ounces or about 1 fillet or 4-14 pieces of sushi	No	No	< 30 minutes / day	Light	Week 6	03	Entered	56	Female	24NOV15	118	Placebo	<250 mg/day	No	No	>=250 mg/day	No	Yes	Yes	Yes	Yes
		Walking		Boiled shrimp	3 times	Twice	03_004	Visit 3	Yes	6	36	29DEC15	1 time	2 to 7 ounces or about 1 fillet or 4-14 pieces of sushi	No	No	< 30 minutes / day	Light	Week 6	03	Entered	56	Female	24NOV15	118	Placebo	<250 mg/day	No	No	>=250 mg/day	No	Yes	Yes	Yes	Yes
		Walking		Boiled shrimp	3 times	Twice	03_004	Visit 3	Yes	6	37	30DEC15	1 time	2 to 7 ounces or about 1 fillet or 4-14 pieces of sushi	No	No	< 30 minutes / day	Light	Week 6	03	Entered	56	Female	24NOV15	118	Placebo	<250 mg/day	No	No	>=250 mg/day	No	Yes	Yes	Yes	Yes
		Walking		Boiled shrimp	3 times	Twice	03_004	Visit 3	Yes	6	38	31DEC15	1 time	2 to 7 ounces or about 1 fillet or 4-14 pieces of sushi	No	No	< 30 minutes / day	Light	Week 6	03	Entered	56	Female	24NOV15	118	Placebo	<250 mg/day	No	No	>=250 mg/day	No	Yes	Yes	Yes	Yes
		Walking		Boiled shrimp	3 times	Twice	03_004	Visit 3	Yes	6	39	01JAN16	1 time	2 to 7 ounces or about 1 fillet or 4-14 pieces of sushi	No	No	< 30 minutes / day	Light	Week 6	03	Entered	56	Female	24NOV15	118	Placebo	<250 mg/day	No	No	>=250 mg/day	No	Yes	Yes	Yes	Yes
		Walking		Boiled shrimp	3 times	Twice	03_004	Visit 3	Yes	6	40	02JAN16	1 time	2 to 7 ounces or about 1 fillet or 4-14 pieces of sushi	No	No	< 30 minutes / day	Light	Week 6	03	Entered	56	Female	24NOV15	118	Placebo	<250 mg/day	No	No	>=250 mg/day	No	Yes	Yes	Yes	Yes
		Walking		Boiled shrimp	3 times	Twice	03_004	Visit 3	Yes	6	41	03JAN16	1 time	2 to 7 ounces or about 1 fillet or 4-14 pieces of sushi	No	No	< 30 minutes / day	Light	Week 6	03	Entered	56	Female	24NOV15	118	Placebo	<250 mg/day	No	No	>=250 mg/day	No	Yes	Yes	Yes	Yes
		Walking			Twice	None	03_004	Visit 4	Yes	7	42	04JAN16	0 (not at all) (if 0, skip questions 2 and 3)		No	No	< 30 minutes / day	Light	Week 12	03	Entered	56	Female	24NOV15	118	Placebo	<250 mg/day	No	No	>=250 mg/day	No	Yes	Yes	Yes	Yes
		Walking			Twice	None	03_004	Visit 4	Yes	7	43	05JAN16	0 (not at all) (if 0, skip questions 2 and 3)		No	No	< 30 minutes / day	Light	Week 12	03	Entered	56	Female	24NOV15	118	Placebo	<250 mg/day	No	No	>=250 mg/day	No	Yes	Yes	Yes	Yes
		Walking			Twice	None	03_004	Visit 4	Yes	7	44	06JAN16	0 (not at all) (if 0, skip questions 2 and 3)		No	No	< 30 minutes / day	Light	Week 12	03	Entered	56	Female	24NOV15	118	Placebo	<250 mg/day	No	No	>=250 mg/day	No	Yes	Yes	Yes	Yes
		Walking			Twice	None	03_004	Visit 4	Yes	7	45	07JAN16	0 (not at all) (if 0, skip questions 2 and 3)		No	No	< 30 minutes / day	Light	Week 12	03	Entered	56	Female	24NOV15	118	Placebo	<250 mg/day	No	No	>=250 mg/day	No	Yes	Yes	Yes	Yes
		Walking			Twice	None	03_004	Visit 4	Yes	7	46	08JAN16	0 (not at all) (if 0, skip questions 2 and 3)		No	No	< 30 minutes / day	Light	Week 12	03	Entered	56	Female	24NOV15	118	Placebo	<250 mg/day	No	No	>=250 mg/day	No	Yes	Yes	Yes	Yes
		Walking			Twice	None	03_004	Visit 4	Yes	7	47	09JAN16	0 (not at all) (if 0, skip questions 2 and 3)		No	No	< 30 minutes / day	Light	Week 12	03	Entered	56	Female	24NOV15	118	Placebo	<250 mg/day	No	No	>=250 mg/day	No	Yes	Yes	Yes	Yes
		Walking	Ate twice, forgot pill with breakfast		Twice	None	03_004	Visit 4	No	7	48	10JAN16	0 (not at all) (if 0, skip questions 2 and 3)		No	No	< 30 minutes / day	Light	Week 12	03	Entered	56	Female	24NOV15	118	Placebo	<250 mg/day	No	No	>=250 mg/day	No	Yes	Yes	Yes	Yes
		Walking (1 mile on 3 days and 1/2 mile on another)	Fast food		Once	Once	03_004	Visit 4	Yes	8	49	11JAN16	0 (not at all) (if 0, skip questions 2 and 3)		No	No	30 or more minutes / day	Moderate	Week 12	03	Entered	56	Female	24NOV15	118	Placebo	<250 mg/day	No	No	>=250 mg/day	No	Yes	Yes	Yes	Yes
		Walking (1 mile on 3 days and 1/2 mile on another)	Walked 1 mile		Once	Once	03_004	Visit 4	Yes	8	50	12JAN16	0 (not at all) (if 0, skip questions 2 and 3)		No	No	30 or more minutes / day	Moderate	Week 12	03	Entered	56	Female	24NOV15	118	Placebo	<250 mg/day	No	No	>=250 mg/day	No	Yes	Yes	Yes	Yes
		Walking (1 mile on 3 days and 1/2 mile on another)	Walked 1 mile, chips		Once	Once	03_004	Visit 4	Yes	8	51	13JAN16	0 (not at all) (if 0, skip questions 2 and 3)		No	No	30 or more minutes / day	Moderate	Week 12	03	Entered	56	Female	24NOV15	118	Placebo	<250 mg/day	No	No	>=250 mg/day	No	Yes	Yes	Yes	Yes
		Walking (1 mile on 3 days and 1/2 mile on another)	Walked 1 mile		Once	Once	03_004	Visit 4	Yes	8	52	14JAN16	0 (not at all) (if 0, skip questions 2 and 3)		No	No	30 or more minutes / day	Moderate	Week 12	03	Entered	56	Female	24NOV15	118	Placebo	<250 mg/day	No	No	>=250 mg/day	No	Yes	Yes	Yes	Yes
		Walking (1 mile on 3 days and 1/2 mile on another)			Once	Once	03_004	Visit 4	Yes	8	53	15JAN16	0 (not at all) (if 0, skip questions 2 and 3)		No	No	30 or more minutes / day	Moderate	Week 12	03	Entered	56	Female	24NOV15	118	Placebo	<250 mg/day	No	No	>=250 mg/day	No	Yes	Yes	Yes	Yes
		Walking (1 mile on 3 days and 1/2 mile on another)	Walked 1/2 mile. Fast food		Once	Once	03_004	Visit 4	Yes	8	54	16JAN16	0 (not at all) (if 0, skip questions 2 and 3)		No	No	30 or more minutes / day	Moderate	Week 12	03	Entered	56	Female	24NOV15	118	Placebo	<250 mg/day	No	No	>=250 mg/day	No	Yes	Yes	Yes	Yes
		Walking (1 mile on 3 days and 1/2 mile on another)			Once	Once	03_004	Visit 4	Yes	8	55	17JAN16	0 (not at all) (if 0, skip questions 2 and 3)		No	No	30 or more minutes / day	Moderate	Week 12	03	Entered	56	Female	24NOV15	118	Placebo	<250 mg/day	No	No	>=250 mg/day	No	Yes	Yes	Yes	Yes
		Walked 1 mile at work M-F	Walked 1 mile		Fast food twice	Chips 3 times	03_004	Visit 4	Yes	9	56	18JAN16	0 (not at all) (if 0, skip questions 2 and 3)		No	No	30 or more minutes / day	Moderate	Week 12	03	Entered	56	Female	24NOV15	118	Placebo	<250 mg/day	No	No	>=250 mg/day	No	Yes	Yes	Yes	Yes
		Walked 1 mile at work M-F	Walked 1 mile		Fast food twice	Chips 3 times	03_004	Visit 4	Yes	9	57	19JAN16	0 (not at all) (if 0, skip questions 2 and 3)		No	No	30 or more minutes / day	Moderate	Week 12	03	Entered	56	Female	24NOV15	118	Placebo	<250 mg/day	No	No	>=250 mg/day	No	Yes	Yes	Yes	Yes
		Walked 1 mile at work M-F	Walked 1 mile		Fast food twice	Chips 3 times	03_004	Visit 4	Yes	9	58	20JAN16	0 (not at all) (if 0, skip questions 2 and 3)		No	No	30 or more minutes / day	Moderate	Week 12	03	Entered	56	Female	24NOV15	118	Placebo	<250 mg/day	No	No	>=250 mg/day	No	Yes	Yes	Yes	Yes
		Walked 1 mile at work M-F	Walked 1 mile		Fast food twice	Chips 3 times	03_004	Visit 4	Yes	9	59	21JAN16	0 (not at all) (if 0, skip questions 2 and 3)		No	No	30 or more minutes / day	Moderate	Week 12	03	Entered	56	Female	24NOV15	118	Placebo	<250 mg/day	No	No	>=250 mg/day	No	Yes	Yes	Yes	Yes
		Walked 1 mile at work M-F	Walked 1 mile		Fast food twice	Chips 3 times	03_004	Visit 4	Yes	9	60	22JAN16	0 (not at all) (if 0, skip questions 2 and 3)		No	No	30 or more minutes / day	Moderate	Week 12	03	Entered	56	Female	24NOV15	118	Placebo	<250 mg/day	No	No	>=250 mg/day	No	Yes	Yes	Yes	Yes
		Walked 1 mile at work M-F			Fast food twice	Chips 3 times	03_004	Visit 4	Yes	9	61	23JAN16	0 (not at all) (if 0, skip questions 2 and 3)		No	No	30 or more minutes / day	Moderate	Week 12	03	Entered	56	Female	24NOV15	118	Placebo	<250 mg/day	No	No	>=250 mg/day	No	Yes	Yes	Yes	Yes
		Walked 1 mile at work M-F			Fast food twice	Chips 3 times	03_004	Visit 4	Yes	9	62	24JAN16	0 (not at all) (if 0, skip questions 2 and 3)		No	No	30 or more minutes / day	Moderate	Week 12	03	Entered	56	Female	24NOV15	118	Placebo	<250 mg/day	No	No	>=250 mg/day	No	Yes	Yes	Yes	Yes
		Walking		Shrimp, boiled	None	Twice	03_004	Visit 4	Yes	10	63	25JAN16	2 times	2 to 7 ounces or about 1 fillet or 4-14 pieces of sushi	No	No	30 or more minutes / day	Moderate	Week 12	03	Entered	56	Female	24NOV15	118	Placebo	<250 mg/day	No	No	>=250 mg/day	No	Yes	Yes	Yes	Yes
		Walking		Shrimp, boiled	None	Twice	03_004	Visit 4	Yes	10	64	26JAN16	2 times	2 to 7 ounces or about 1 fillet or 4-14 pieces of sushi	No	No	30 or more minutes / day	Moderate	Week 12	03	Entered	56	Female	24NOV15	118	Placebo	<250 mg/day	No	No	>=250 mg/day	No	Yes	Yes	Yes	Yes
		Walking	Walked 1 mile	Shrimp, boiled	None	Twice	03_004	Visit 4	Yes	10	65	27JAN16	2 times	2 to 7 ounces or about 1 fillet or 4-14 pieces of sushi	No	No	30 or more minutes / day	Moderate	Week 12	03	Entered	56	Female	24NOV15	118	Placebo	<250 mg/day	No	No	>=250 mg/day	No	Yes	Yes	Yes	Yes
		Walking	Walked 1/2 mile. Boiled shrimp	Shrimp, boiled	None	Twice	03_004	Visit 4	Yes	10	66	28JAN16	2 times	2 to 7 ounces or about 1 fillet or 4-14 pieces of sushi	No	No	30 or more minutes / day	Moderate	Week 12	03	Entered	56	Female	24NOV15	118	Placebo	<250 mg/day	No	No	>=250 mg/day	No	Yes	Yes	Yes	Yes
		Walking	Walked 1 mile. Chips. Boiled shrimp	Shrimp, boiled	None	Twice	03_004	Visit 4	Yes	10	67	29JAN16	2 times	2 to 7 ounces or about 1 fillet or 4-14 pieces of sushi	No	No	30 or more minutes / day	Moderate	Week 12	03	Entered	56	Female	24NOV15	118	Placebo	<250 mg/day	No	No	>=250 mg/day	No	Yes	Yes	Yes	Yes
		Walking	Chips	Shrimp, boiled	None	Twice	03_004	Visit 4	Yes	10	68	30JAN16	2 times	2 to 7 ounces or about 1 fillet or 4-14 pieces of sushi	No	No	30 or more minutes / day	Moderate	Week 12	03	Entered	56	Female	24NOV15	118	Placebo	<250 mg/day	No	No	>=250 mg/day	No	Yes	Yes	Yes	Yes
		Walking		Shrimp, boiled	None	Twice	03_004	Visit 4	Yes	10	69	31JAN16	2 times	2 to 7 ounces or about 1 fillet or 4-14 pieces of sushi	No	No	30 or more minutes / day	Moderate	Week 12	03	Entered	56	Female	24NOV15	118	Placebo	<250 mg/day	No	No	>=250 mg/day	No	Yes	Yes	Yes	Yes
		Walk during lunch at work, 4 days 1 mile each day	Walked 1 mile , tuna salad	cod, tuna, clams	Twice	Thrice	03_004	Visit 4	Yes	11	70	01FEB16	More than 2 times	2 to 7 ounces or about 1 fillet or 4-14 pieces of sushi	No	No	30 or more minutes / day	Moderate	Week 12	03	Entered	56	Female	24NOV15	118	Placebo	<250 mg/day	No	No	>=250 mg/day	No	Yes	Yes	Yes	Yes
		Walk during lunch at work, 4 days 1 mile each day	Walked 1 mile , fried fast food	cod, tuna, clams	Twice	Thrice	03_004	Visit 4	Yes	11	71	02FEB16	More than 2 times	2 to 7 ounces or about 1 fillet or 4-14 pieces of sushi	No	No	30 or more minutes / day	Moderate	Week 12	03	Entered	56	Female	24NOV15	118	Placebo	<250 mg/day	No	No	>=250 mg/day	No	Yes	Yes	Yes	Yes
		Walk during lunch at work, 4 days 1 mile each day	Walked 1 mile	cod, tuna, clams	Twice	Thrice	03_004	Visit 4	Yes	11	72	03FEB16	More than 2 times	2 to 7 ounces or about 1 fillet or 4-14 pieces of sushi	No	No	30 or more minutes / day	Moderate	Week 12	03	Entered	56	Female	24NOV15	118	Placebo	<250 mg/day	No	No	>=250 mg/day	No	Yes	Yes	Yes	Yes
		Walk during lunch at work, 4 days 1 mile each day	Walked 1 mile , tuna salad	cod, tuna, clams	Twice	Thrice	03_004	Visit 4	Yes	11	73	04FEB16	More than 2 times	2 to 7 ounces or about 1 fillet or 4-14 pieces of sushi	No	No	30 or more minutes / day	Moderate	Week 12	03	Entered	56	Female	24NOV15	118	Placebo	<250 mg/day	No	No	>=250 mg/day	No	Yes	Yes	Yes	Yes
		Walk during lunch at work, 4 days 1 mile each day	Fried fish	cod, tuna, clams	Twice	Thrice	03_004	Visit 4	Yes	11	74	05FEB16	More than 2 times	2 to 7 ounces or about 1 fillet or 4-14 pieces of sushi	No	No	30 or more minutes / day	Moderate	Week 12	03	Entered	56	Female	24NOV15	118	Placebo	<250 mg/day	No	No	>=250 mg/day	No	Yes	Yes	Yes	Yes
		Walk during lunch at work, 4 days 1 mile each day	Chips & clams	cod, tuna, clams	Twice	Thrice	03_004	Visit 4	Yes	11	75	06FEB16	More than 2 times	2 to 7 ounces or about 1 fillet or 4-14 pieces of sushi	No	No	30 or more minutes / day	Moderate	Week 12	03	Entered	56	Female	24NOV15	118	Placebo	<250 mg/day	No	No	>=250 mg/day	No	Yes	Yes	Yes	Yes
		Walk during lunch at work, 4 days 1 mile each day	Chips & clams	cod, tuna, clams	Twice	Thrice	03_004	Visit 4	Yes	11	76	07FEB16	More than 2 times	2 to 7 ounces or about 1 fillet or 4-14 pieces of sushi	No	No	30 or more minutes / day	Moderate	Week 12	03	Entered	56	Female	24NOV15	118	Placebo	<250 mg/day	No	No	>=250 mg/day	No	Yes	Yes	Yes	Yes
		Walking	Walked 1/2 mile	Boiled shrimp	Once	None	03_004	Visit 4	Yes	12	77	08FEB16	1 time	2 to 7 ounces or about 1 fillet or 4-14 pieces of sushi	No	No	30 or more minutes / day	Moderate	Week 12	03	Entered	56	Female	24NOV15	118	Placebo	<250 mg/day	No	No	>=250 mg/day	No	Yes	Yes	Yes	Yes
		Walking	Walked 1 mile	Boiled shrimp	Once	None	03_004	Visit 4	Yes	12	78	09FEB16	1 time	2 to 7 ounces or about 1 fillet or 4-14 pieces of sushi	No	No	30 or more minutes / day	Moderate	Week 12	03	Entered	56	Female	24NOV15	118	Placebo	<250 mg/day	No	No	>=250 mg/day	No	Yes	Yes	Yes	Yes
		Walking	Walked 1 mile	Boiled shrimp	Once	None	03_004	Visit 4	Yes	12	79	10FEB16	1 time	2 to 7 ounces or about 1 fillet or 4-14 pieces of sushi	No	No	30 or more minutes / day	Moderate	Week 12	03	Entered	56	Female	24NOV15	118	Placebo	<250 mg/day	No	No	>=250 mg/day	No	Yes	Yes	Yes	Yes
		Walking	Walked 1 mile	Boiled shrimp	Once	None	03_004	Visit 4	Yes	12	80	11FEB16	1 time	2 to 7 ounces or about 1 fillet or 4-14 pieces of sushi	No	No	30 or more minutes / day	Moderate	Week 12	03	Entered	56	Female	24NOV15	118	Placebo	<250 mg/day	No	No	>=250 mg/day	No	Yes	Yes	Yes	Yes
		Walking	Boiled shrimp	Boiled shrimp	Once	None	03_004	Visit 4	Yes	12	81	12FEB16	1 time	2 to 7 ounces or about 1 fillet or 4-14 pieces of sushi	No	No	30 or more minutes / day	Moderate	Week 12	03	Entered	56	Female	24NOV15	118	Placebo	<250 mg/day	No	No	>=250 mg/day	No	Yes	Yes	Yes	Yes
		Walking		Boiled shrimp	Once	None	03_004	Visit 4	Yes	12	82	13FEB16	1 time	2 to 7 ounces or about 1 fillet or 4-14 pieces of sushi	No	No	30 or more minutes / day	Moderate	Week 12	03	Entered	56	Female	24NOV15	118	Placebo	<250 mg/day	No	No	>=250 mg/day	No	Yes	Yes	Yes	Yes
		Walking		Boiled shrimp	Once	None	03_004	Visit 4	Yes	12	83	14FEB16	1 time	2 to 7 ounces or about 1 fillet or 4-14 pieces of sushi	No	No	30 or more minutes / day	Moderate	Week 12	03	Entered	56	Female	24NOV15	118	Placebo	<250 mg/day	No	No	>=250 mg/day	No	Yes	Yes	Yes	Yes
		Walking	Boiled shrimp, nuts	Boiled shrimp	Twice	Chips once, nuts twice	03_004	Visit 5	Yes	13	84	15FEB16	2 times	2 to 7 ounces or about 1 fillet or 4-14 pieces of sushi	No	No	30 or more minutes / day	Light	Week 24	03	Entered	56	Female	24NOV15	118	Placebo	<250 mg/day	No	No	>=250 mg/day	No	Yes	Yes	Yes	Yes
		Walking	Shrimp, chips	Boiled shrimp	Twice	Chips once, nuts twice	03_004	Visit 5	Yes	13	85	16FEB16	2 times	2 to 7 ounces or about 1 fillet or 4-14 pieces of sushi	No	No	30 or more minutes / day	Light	Week 24	03	Entered	56	Female	24NOV15	118	Placebo	<250 mg/day	No	No	>=250 mg/day	No	Yes	Yes	Yes	Yes
		Walking	Nuts, fried fast food, walked 1/2 mile	Boiled shrimp	Twice	Chips once, nuts twice	03_004	Visit 5	Yes	13	86	17FEB16	2 times	2 to 7 ounces or about 1 fillet or 4-14 pieces of sushi	No	No	30 or more minutes / day	Light	Week 24	03	Entered	56	Female	24NOV15	118	Placebo	<250 mg/day	No	No	>=250 mg/day	No	Yes	Yes	Yes	Yes
		Walking	Fried fast food	Boiled shrimp	Twice	Chips once, nuts twice	03_004	Visit 5	Yes	13	87	18FEB16	2 times	2 to 7 ounces or about 1 fillet or 4-14 pieces of sushi	No	No	30 or more minutes / day	Light	Week 24	03	Entered	56	Female	24NOV15	118	Placebo	<250 mg/day	No	No	>=250 mg/day	No	Yes	Yes	Yes	Yes
		Walking		Boiled shrimp	Twice	Chips once, nuts twice	03_004	Visit 5	Yes	13	88	19FEB16	2 times	2 to 7 ounces or about 1 fillet or 4-14 pieces of sushi	No	No	30 or more minutes / day	Light	Week 24	03	Entered	56	Female	24NOV15	118	Placebo	<250 mg/day	No	No	>=250 mg/day	No	Yes	Yes	Yes	Yes
		Walking		Boiled shrimp	Twice	Chips once, nuts twice	03_004	Visit 5	Yes	13	89	20FEB16	2 times	2 to 7 ounces or about 1 fillet or 4-14 pieces of sushi	No	No	30 or more minutes / day	Light	Week 24	03	Entered	56	Female	24NOV15	118	Placebo	<250 mg/day	No	No	>=250 mg/day	No	Yes	Yes	Yes	Yes
		Walking	2 capsules, only ate twice	Boiled shrimp	Twice	Chips once, nuts twice	03_004	Visit 5	No	13	90	21FEB16	2 times	2 to 7 ounces or about 1 fillet or 4-14 pieces of sushi	No	No	30 or more minutes / day	Light	Week 24	03	Entered	56	Female	24NOV15	118	Placebo	<250 mg/day	No	No	>=250 mg/day	No	Yes	Yes	Yes	Yes
		One day only, walked 1 mile		Cod	None	None	03_004	Visit 5	Yes	14	91	22MAR16	1 time	2 to 7 ounces or about 1 fillet or 4-14 pieces of sushi	No	No	30 or more minutes / day	Moderate	Week 24	03	Entered	56	Female	24NOV15	118	Placebo	<250 mg/day	No	No	>=250 mg/day	No	Yes	Yes	Yes	Yes
		One day only, walked 1 mile		Cod	None	None	03_004	Visit 5	Yes	14	92	23MAR16	1 time	2 to 7 ounces or about 1 fillet or 4-14 pieces of sushi	No	No	30 or more minutes / day	Moderate	Week 24	03	Entered	56	Female	24NOV15	118	Placebo	<250 mg/day	No	No	>=250 mg/day	No	Yes	Yes	Yes	Yes
		One day only, walked 1 mile	Fish fillet	Cod	None	None	03_004	Visit 5	Yes	14	93	24MAR16	1 time	2 to 7 ounces or about 1 fillet or 4-14 pieces of sushi	No	No	30 or more minutes / day	Moderate	Week 24	03	Entered	56	Female	24NOV15	118	Placebo	<250 mg/day	No	No	>=250 mg/day	No	Yes	Yes	Yes	Yes
		One day only, walked 1 mile		Cod	None	None	03_004	Visit 5	Yes	14	94	25MAR16	1 time	2 to 7 ounces or about 1 fillet or 4-14 pieces of sushi	No	No	30 or more minutes / day	Moderate	Week 24	03	Entered	56	Female	24NOV15	118	Placebo	<250 mg/day	No	No	>=250 mg/day	No	Yes	Yes	Yes	Yes
		One day only, walked 1 mile	Walked 1 mile	Cod	None	None	03_004	Visit 5	Yes	14	95	26MAR16	1 time	2 to 7 ounces or about 1 fillet or 4-14 pieces of sushi	No	No	30 or more minutes / day	Moderate	Week 24	03	Entered	56	Female	24NOV15	118	Placebo	<250 mg/day	No	No	>=250 mg/day	No	Yes	Yes	Yes	Yes
		One day only, walked 1 mile		Cod	None	None	03_004	Visit 5	Yes	14	96	27MAR16	1 time	2 to 7 ounces or about 1 fillet or 4-14 pieces of sushi	No	No	30 or more minutes / day	Moderate	Week 24	03	Entered	56	Female	24NOV15	118	Placebo	<250 mg/day	No	No	>=250 mg/day	No	Yes	Yes	Yes	Yes
		One day only, walked 1 mile		Cod	None	None	03_004	Visit 5	Yes	14	97	28MAR16	1 time	2 to 7 ounces or about 1 fillet or 4-14 pieces of sushi	No	No	30 or more minutes / day	Moderate	Week 24	03	Entered	56	Female	24NOV15	118	Placebo	<250 mg/day	No	No	>=250 mg/day	No	Yes	Yes	Yes	Yes
	See day 104. Fluconazole 100 mg	Walking		Cod	Once	Nuts once chips once	03_004	Visit 5	Yes	15	98	29FEB16	1 time	2 to 7 ounces or about 1 fillet or 4-14 pieces of sushi	No	Yes	< 30 minutes / day	Light	Week 24	03	Entered	56	Female	24NOV15	118	Placebo	<250 mg/day	No	No	>=250 mg/day	No	Yes	Yes	Yes	Yes
	See day 104. Fluconazole 100 mg	Walking	Fried fish	Cod	Once	Nuts once chips once	03_004	Visit 5	Yes	15	99	01MAR16	1 time	2 to 7 ounces or about 1 fillet or 4-14 pieces of sushi	No	Yes	< 30 minutes / day	Light	Week 24	03	Entered	56	Female	24NOV15	118	Placebo	<250 mg/day	No	No	>=250 mg/day	No	Yes	Yes	Yes	Yes
	See day 104. Fluconazole 100 mg	Walking		Cod	Once	Nuts once chips once	03_004	Visit 5	Yes	15	100	02MAR16	1 time	2 to 7 ounces or about 1 fillet or 4-14 pieces of sushi	No	Yes	< 30 minutes / day	Light	Week 24	03	Entered	56	Female	24NOV15	118	Placebo	<250 mg/day	No	No	>=250 mg/day	No	Yes	Yes	Yes	Yes
	See day 104. Fluconazole 100 mg	Walking		Cod	Once	Nuts once chips once	03_004	Visit 5	Yes	15	101	03MAR16	1 time	2 to 7 ounces or about 1 fillet or 4-14 pieces of sushi	No	Yes	< 30 minutes / day	Light	Week 24	03	Entered	56	Female	24NOV15	118	Placebo	<250 mg/day	No	No	>=250 mg/day	No	Yes	Yes	Yes	Yes
	See day 104. Fluconazole 100 mg	Walking		Cod	Once	Nuts once chips once	03_004	Visit 5	Yes	15	102	04MAR16	1 time	2 to 7 ounces or about 1 fillet or 4-14 pieces of sushi	No	Yes	< 30 minutes / day	Light	Week 24	03	Entered	56	Female	24NOV15	118	Placebo	<250 mg/day	No	No	>=250 mg/day	No	Yes	Yes	Yes	Yes
	See day 104. Fluconazole 100 mg	Walking	Nuts	Cod	Once	Nuts once chips once	03_004	Visit 5	Yes	15	103	05MAR16	1 time	2 to 7 ounces or about 1 fillet or 4-14 pieces of sushi	No	Yes	< 30 minutes / day	Light	Week 24	03	Entered	56	Female	24NOV15	118	Placebo	<250 mg/day	No	No	>=250 mg/day	No	Yes	Yes	Yes	Yes
	See day 104. Fluconazole 100 mg	Walking	Started 7 days of fluconazole for yeast infection	Cod	Once	Nuts once chips once	03_004	Visit 5	Yes	15	104	06MAR16	1 time	2 to 7 ounces or about 1 fillet or 4-14 pieces of sushi	No	Yes	< 30 minutes / day	Light	Week 24	03	Entered	56	Female	24NOV15	118	Placebo	<250 mg/day	No	No	>=250 mg/day	No	Yes	Yes	Yes	Yes
		Walking	Walked 1 mile		Fast food twice	Nuts twice	03_004	Visit 5	Yes	16	105	07MAR16	0 (not at all) (if 0, skip questions 2 and 3)		No	No	30 or more minutes / day	Moderate	Week 24	03	Entered	56	Female	24NOV15	118	Placebo	<250 mg/day	No	No	>=250 mg/day	No	Yes	Yes	Yes	Yes
		Walking			Fast food twice	Nuts twice	03_004	Visit 5	Yes	16	106	08MAR16	0 (not at all) (if 0, skip questions 2 and 3)		No	No	30 or more minutes / day	Moderate	Week 24	03	Entered	56	Female	24NOV15	118	Placebo	<250 mg/day	No	No	>=250 mg/day	No	Yes	Yes	Yes	Yes
		Walking			Fast food twice	Nuts twice	03_004	Visit 5	Yes	16	107	09MAR16	0 (not at all) (if 0, skip questions 2 and 3)		No	No	30 or more minutes / day	Moderate	Week 24	03	Entered	56	Female	24NOV15	118	Placebo	<250 mg/day	No	No	>=250 mg/day	No	Yes	Yes	Yes	Yes
		Walking			Fast food twice	Nuts twice	03_004	Visit 5	Yes	16	108	10MAR16	0 (not at all) (if 0, skip questions 2 and 3)		No	No	30 or more minutes / day	Moderate	Week 24	03	Entered	56	Female	24NOV15	118	Placebo	<250 mg/day	No	No	>=250 mg/day	No	Yes	Yes	Yes	Yes
		Walking	Walked 1 mile		Fast food twice	Nuts twice	03_004	Visit 5	Yes	16	109	11MAR16	0 (not at all) (if 0, skip questions 2 and 3)		No	No	30 or more minutes / day	Moderate	Week 24	03	Entered	56	Female	24NOV15	118	Placebo	<250 mg/day	No	No	>=250 mg/day	No	Yes	Yes	Yes	Yes
		Walking	Walked 1 mile		Fast food twice	Nuts twice	03_004	Visit 5	Yes	16	110	12MAR16	0 (not at all) (if 0, skip questions 2 and 3)		No	No	30 or more minutes / day	Moderate	Week 24	03	Entered	56	Female	24NOV15	118	Placebo	<250 mg/day	No	No	>=250 mg/day	No	Yes	Yes	Yes	Yes
		Walking			Fast food twice	Nuts twice	03_004	Visit 5	Yes	16	111	13MAR16	0 (not at all) (if 0, skip questions 2 and 3)		No	No	30 or more minutes / day	Moderate	Week 24	03	Entered	56	Female	24NOV15	118	Placebo	<250 mg/day	No	No	>=250 mg/day	No	Yes	Yes	Yes	Yes
		Walking			Fast food twice	Nuts twice	03_004	Visit 5	Yes	17	112	14MAR16	0 (not at all) (if 0, skip questions 2 and 3)		No	No	< 30 minutes / day	Light	Week 24	03	Entered	56	Female	24NOV15	118	Placebo	<250 mg/day	No	No	>=250 mg/day	No	Yes	Yes	Yes	Yes
		Walking			Fast food twice	Nuts twice	03_004	Visit 5	Yes	17	113	15MAR16	0 (not at all) (if 0, skip questions 2 and 3)		No	No	< 30 minutes / day	Light	Week 24	03	Entered	56	Female	24NOV15	118	Placebo	<250 mg/day	No	No	>=250 mg/day	No	Yes	Yes	Yes	Yes
		Walking			Fast food twice	Nuts twice	03_004	Visit 5	Yes	17	114	16MAR16	0 (not at all) (if 0, skip questions 2 and 3)		No	No	< 30 minutes / day	Light	Week 24	03	Entered	56	Female	24NOV15	118	Placebo	<250 mg/day	No	No	>=250 mg/day	No	Yes	Yes	Yes	Yes
		Walking	Walked 1 mile		Fast food twice	Nuts twice	03_004	Visit 5	Yes	17	115	17MAR16	0 (not at all) (if 0, skip questions 2 and 3)		No	No	< 30 minutes / day	Light	Week 24	03	Entered	56	Female	24NOV15	118	Placebo	<250 mg/day	No	No	>=250 mg/day	No	Yes	Yes	Yes	Yes
		Walking			Fast food twice	Nuts twice	03_004	Visit 5	Yes	17	116	18MAR16	0 (not at all) (if 0, skip questions 2 and 3)		No	No	< 30 minutes / day	Light	Week 24	03	Entered	56	Female	24NOV15	118	Placebo	<250 mg/day	No	No	>=250 mg/day	No	Yes	Yes	Yes	Yes
		Walking	Missed lunch dose		Fast food twice	Nuts twice	03_004	Visit 5	No	17	117	19MAR16	0 (not at all) (if 0, skip questions 2 and 3)		No	No	< 30 minutes / day	Light	Week 24	03	Entered	56	Female	24NOV15	118	Placebo	<250 mg/day	No	No	>=250 mg/day	No	Yes	Yes	Yes	Yes
		Walking			Fast food twice	Nuts twice	03_004	Visit 5	Yes	17	118	20MAR16	0 (not at all) (if 0, skip questions 2 and 3)		No	No	< 30 minutes / day	Light	Week 24	03	Entered	56	Female	24NOV15	118	Placebo	<250 mg/day	No	No	>=250 mg/day	No	Yes	Yes	Yes	Yes
		Walking			Once	None	03_004	Visit 5	Yes	18	119	21MAR16	0 (not at all) (if 0, skip questions 2 and 3)		No	No	< 30 minutes / day	Light	Week 24	03	Entered	56	Female	24NOV15	118	Placebo	<250 mg/day	No	No	>=250 mg/day	No	Yes	Yes	Yes	Yes
		Walking			Once	None	03_004	Visit 5	Yes	18	120	22MAR16	0 (not at all) (if 0, skip questions 2 and 3)		No	No	< 30 minutes / day	Light	Week 24	03	Entered	56	Female	24NOV15	118	Placebo	<250 mg/day	No	No	>=250 mg/day	No	Yes	Yes	Yes	Yes
		Walking			Once	None	03_004	Visit 5	Yes	18	121	23MAR16	0 (not at all) (if 0, skip questions 2 and 3)		No	No	< 30 minutes / day	Light	Week 24	03	Entered	56	Female	24NOV15	118	Placebo	<250 mg/day	No	No	>=250 mg/day	No	Yes	Yes	Yes	Yes
		Walking			Once	None	03_004	Visit 5	Yes	18	122	24MAR16	0 (not at all) (if 0, skip questions 2 and 3)		No	No	< 30 minutes / day	Light	Week 24	03	Entered	56	Female	24NOV15	118	Placebo	<250 mg/day	No	No	>=250 mg/day	No	Yes	Yes	Yes	Yes
		Walking			Once	None	03_004	Visit 5	Yes	18	123	25MAR16	0 (not at all) (if 0, skip questions 2 and 3)		No	No	< 30 minutes / day	Light	Week 24	03	Entered	56	Female	24NOV15	118	Placebo	<250 mg/day	No	No	>=250 mg/day	No	Yes	Yes	Yes	Yes
		Walking			Once	None	03_004	Visit 5	Yes	18	124	26MAR16	0 (not at all) (if 0, skip questions 2 and 3)		No	No	< 30 minutes / day	Light	Week 24	03	Entered	56	Female	24NOV15	118	Placebo	<250 mg/day	No	No	>=250 mg/day	No	Yes	Yes	Yes	Yes
		Walking			Once	None	03_004	Visit 5	Yes	18	125	27MAR16	0 (not at all) (if 0, skip questions 2 and 3)		No	No	< 30 minutes / day	Light	Week 24	03	Entered	56	Female	24NOV15	118	Placebo	<250 mg/day	No	No	>=250 mg/day	No	Yes	Yes	Yes	Yes
	Antibiotic for tooth extraction. On vacation, didn't bring bottle. Will fill in name and dosage next week.	Walking			Once	Once	03_004	Visit 5	Yes	19	126	28MAR16	0 (not at all) (if 0, skip questions 2 and 3)		No	Yes	< 30 minutes / day	Light	Week 24	03	Entered	56	Female	24NOV15	118	Placebo	<250 mg/day	No	No	>=250 mg/day	No	Yes	Yes	Yes	Yes
	Antibiotic for tooth extraction. On vacation, didn't bring bottle. Will fill in name and dosage next week.	Walking			Once	Once	03_004	Visit 5	Yes	19	127	29MAR16	0 (not at all) (if 0, skip questions 2 and 3)		No	Yes	< 30 minutes / day	Light	Week 24	03	Entered	56	Female	24NOV15	118	Placebo	<250 mg/day	No	No	>=250 mg/day	No	Yes	Yes	Yes	Yes
	Antibiotic for tooth extraction. On vacation, didn't bring bottle. Will fill in name and dosage next week.	Walking			Once	Once	03_004	Visit 5	Yes	19	128	30MAR16	0 (not at all) (if 0, skip questions 2 and 3)		No	Yes	< 30 minutes / day	Light	Week 24	03	Entered	56	Female	24NOV15	118	Placebo	<250 mg/day	No	No	>=250 mg/day	No	Yes	Yes	Yes	Yes
	Antibiotic for tooth extraction. On vacation, didn't bring bottle. Will fill in name and dosage next week.	Walking	Walked 1 mile		Once	Once	03_004	Visit 5	Yes	19	129	31MAR16	0 (not at all) (if 0, skip questions 2 and 3)		No	Yes	< 30 minutes / day	Light	Week 24	03	Entered	56	Female	24NOV15	118	Placebo	<250 mg/day	No	No	>=250 mg/day	No	Yes	Yes	Yes	Yes
	Antibiotic for tooth extraction. On vacation, didn't bring bottle. Will fill in name and dosage next week.	Walking	Tooth extraction, antibiotics started		Once	Once	03_004	Visit 5	Yes	19	130	01APR16	0 (not at all) (if 0, skip questions 2 and 3)		No	Yes	< 30 minutes / day	Light	Week 24	03	Entered	56	Female	24NOV15	118	Placebo	<250 mg/day	No	No	>=250 mg/day	No	Yes	Yes	Yes	Yes
	Antibiotic for tooth extraction. On vacation, didn't bring bottle. Will fill in name and dosage next week.	Walking			Once	Once	03_004	Visit 5	Yes	19	131	02APR16	0 (not at all) (if 0, skip questions 2 and 3)		No	Yes	< 30 minutes / day	Light	Week 24	03	Entered	56	Female	24NOV15	118	Placebo	<250 mg/day	No	No	>=250 mg/day	No	Yes	Yes	Yes	Yes
	Antibiotic for tooth extraction. On vacation, didn't bring bottle. Will fill in name and dosage next week.	Walking			Once	Once	03_004	Visit 5	Yes	19	132	03APR16	0 (not at all) (if 0, skip questions 2 and 3)		No	Yes	< 30 minutes / day	Light	Week 24	03	Entered	56	Female	24NOV15	118	Placebo	<250 mg/day	No	No	>=250 mg/day	No	Yes	Yes	Yes	Yes
	Antibiotic (sorry, don't have bottle with me)	Walking			Twice	Twice	03_004	Visit 5	Yes	20	133	04APR16	0 (not at all) (if 0, skip questions 2 and 3)		No	Yes	< 30 minutes / day	Moderate	Week 24	03	Entered	56	Female	24NOV15	118	Placebo	<250 mg/day	No	No	>=250 mg/day	No	Yes	Yes	Yes	Yes
	Antibiotic (sorry, don't have bottle with me)	Walking			Twice	Twice	03_004	Visit 5	Yes	20	134	05APR16	0 (not at all) (if 0, skip questions 2 and 3)		No	Yes	< 30 minutes / day	Moderate	Week 24	03	Entered	56	Female	24NOV15	118	Placebo	<250 mg/day	No	No	>=250 mg/day	No	Yes	Yes	Yes	Yes
	Antibiotic (sorry, don't have bottle with me)	Walking			Twice	Twice	03_004	Visit 5	Yes	20	135	06APR16	0 (not at all) (if 0, skip questions 2 and 3)		No	Yes	< 30 minutes / day	Moderate	Week 24	03	Entered	56	Female	24NOV15	118	Placebo	<250 mg/day	No	No	>=250 mg/day	No	Yes	Yes	Yes	Yes
	Antibiotic (sorry, don't have bottle with me)	Walking			Twice	Twice	03_004	Visit 5	Yes	20	136	07APR16	0 (not at all) (if 0, skip questions 2 and 3)		No	Yes	< 30 minutes / day	Moderate	Week 24	03	Entered	56	Female	24NOV15	118	Placebo	<250 mg/day	No	No	>=250 mg/day	No	Yes	Yes	Yes	Yes
	Antibiotic (sorry, don't have bottle with me)	Walking			Twice	Twice	03_004	Visit 5	Yes	20	137	08APR16	0 (not at all) (if 0, skip questions 2 and 3)		No	Yes	< 30 minutes / day	Moderate	Week 24	03	Entered	56	Female	24NOV15	118	Placebo	<250 mg/day	No	No	>=250 mg/day	No	Yes	Yes	Yes	Yes
	Antibiotic (sorry, don't have bottle with me)	Walking			Twice	Twice	03_004	Visit 5	Yes	20	138	09APR16	0 (not at all) (if 0, skip questions 2 and 3)		No	Yes	< 30 minutes / day	Moderate	Week 24	03	Entered	56	Female	24NOV15	118	Placebo	<250 mg/day	No	No	>=250 mg/day	No	Yes	Yes	Yes	Yes
	Antibiotic (sorry, don't have bottle with me)	Walking			Twice	Twice	03_004	Visit 5	Yes	20	139	10APR16	0 (not at all) (if 0, skip questions 2 and 3)		No	Yes	< 30 minutes / day	Moderate	Week 24	03	Entered	56	Female	24NOV15	118	Placebo	<250 mg/day	No	No	>=250 mg/day	No	Yes	Yes	Yes	Yes
		Walking		Boiled shrimp	3 times	2 times	03_004	Visit 5	Yes	21	140	11APR16	1 time	2 to 7 ounces or about 1 fillet or 4-14 pieces of sushi	No	No	< 30 minutes / day	Light	Week 24	03	Entered	56	Female	24NOV15	118	Placebo	<250 mg/day	No	No	>=250 mg/day	No	Yes	Yes	Yes	Yes
		Walking		Boiled shrimp	3 times	2 times	03_004	Visit 5	Yes	21	141	12APR16	1 time	2 to 7 ounces or about 1 fillet or 4-14 pieces of sushi	No	No	< 30 minutes / day	Light	Week 24	03	Entered	56	Female	24NOV15	118	Placebo	<250 mg/day	No	No	>=250 mg/day	No	Yes	Yes	Yes	Yes
		Walking		Boiled shrimp	3 times	2 times	03_004	Visit 5	Yes	21	142	13APR16	1 time	2 to 7 ounces or about 1 fillet or 4-14 pieces of sushi	No	No	< 30 minutes / day	Light	Week 24	03	Entered	56	Female	24NOV15	118	Placebo	<250 mg/day	No	No	>=250 mg/day	No	Yes	Yes	Yes	Yes
		Walking		Boiled shrimp	3 times	2 times	03_004	Visit 5	Yes	21	143	14APR16	1 time	2 to 7 ounces or about 1 fillet or 4-14 pieces of sushi	No	No	< 30 minutes / day	Light	Week 24	03	Entered	56	Female	24NOV15	118	Placebo	<250 mg/day	No	No	>=250 mg/day	No	Yes	Yes	Yes	Yes
		Walking		Boiled shrimp	3 times	2 times	03_004	Visit 5	Yes	21	144	15APR16	1 time	2 to 7 ounces or about 1 fillet or 4-14 pieces of sushi	No	No	< 30 minutes / day	Light	Week 24	03	Entered	56	Female	24NOV15	118	Placebo	<250 mg/day	No	No	>=250 mg/day	No	Yes	Yes	Yes	Yes
		Walking		Boiled shrimp	3 times	2 times	03_004	Visit 5	Yes	21	145	16APR16	1 time	2 to 7 ounces or about 1 fillet or 4-14 pieces of sushi	No	No	< 30 minutes / day	Light	Week 24	03	Entered	56	Female	24NOV15	118	Placebo	<250 mg/day	No	No	>=250 mg/day	No	Yes	Yes	Yes	Yes
		Walking		Boiled shrimp	3 times	2 times	03_004	Visit 5	Yes	21	146	17APR16	1 time	2 to 7 ounces or about 1 fillet or 4-14 pieces of sushi	No	No	< 30 minutes / day	Light	Week 24	03	Entered	56	Female	24NOV15	118	Placebo	<250 mg/day	No	No	>=250 mg/day	No	Yes	Yes	Yes	Yes
		Walking			4	2	03_004	Visit 5	Yes	22	147	18APR16	0 (not at all) (if 0, skip questions 2 and 3)		No	No	< 30 minutes / day	Light	Week 24	03	Entered	56	Female	24NOV15	118	Placebo	<250 mg/day	No	No	>=250 mg/day	No	Yes	Yes	Yes	Yes
		Walking			4	2	03_004	Visit 5	Yes	22	148	19APR16	0 (not at all) (if 0, skip questions 2 and 3)		No	No	< 30 minutes / day	Light	Week 24	03	Entered	56	Female	24NOV15	118	Placebo	<250 mg/day	No	No	>=250 mg/day	No	Yes	Yes	Yes	Yes
		Walking			4	2	03_004	Visit 5	Yes	22	149	20APR16	0 (not at all) (if 0, skip questions 2 and 3)		No	No	< 30 minutes / day	Light	Week 24	03	Entered	56	Female	24NOV15	118	Placebo	<250 mg/day	No	No	>=250 mg/day	No	Yes	Yes	Yes	Yes
		Walking			4	2	03_004	Visit 5	Yes	22	150	21APR16	0 (not at all) (if 0, skip questions 2 and 3)		No	No	< 30 minutes / day	Light	Week 24	03	Entered	56	Female	24NOV15	118	Placebo	<250 mg/day	No	No	>=250 mg/day	No	Yes	Yes	Yes	Yes
		Walking			4	2	03_004	Visit 5	Yes	22	151	22APR16	0 (not at all) (if 0, skip questions 2 and 3)		No	No	< 30 minutes / day	Light	Week 24	03	Entered	56	Female	24NOV15	118	Placebo	<250 mg/day	No	No	>=250 mg/day	No	Yes	Yes	Yes	Yes
		Walking			4	2	03_004	Visit 5	Yes	22	152	23APR16	0 (not at all) (if 0, skip questions 2 and 3)		No	No	< 30 minutes / day	Light	Week 24	03	Entered	56	Female	24NOV15	118	Placebo	<250 mg/day	No	No	>=250 mg/day	No	Yes	Yes	Yes	Yes
		Walking			4	2	03_004	Visit 5	Yes	22	153	24APR16	0 (not at all) (if 0, skip questions 2 and 3)		No	No	< 30 minutes / day	Light	Week 24	03	Entered	56	Female	24NOV15	118	Placebo	<250 mg/day	No	No	>=250 mg/day	No	Yes	Yes	Yes	Yes
		Walking and gardening		Boiled shrimp	3	2	03_004	Visit 5	Yes	23	154	25APR16	2 times	2 to 7 ounces or about 1 fillet or 4-14 pieces of sushi	No	No	< 30 minutes / day	Light	Week 24	03	Entered	56	Female	24NOV15	118	Placebo	<250 mg/day	No	No	>=250 mg/day	No	Yes	Yes	Yes	Yes
		Walking and gardening		Boiled shrimp	3	2	03_004	Visit 5	Yes	23	155	26APR16	2 times	2 to 7 ounces or about 1 fillet or 4-14 pieces of sushi	No	No	< 30 minutes / day	Light	Week 24	03	Entered	56	Female	24NOV15	118	Placebo	<250 mg/day	No	No	>=250 mg/day	No	Yes	Yes	Yes	Yes
		Walking and gardening		Boiled shrimp	3	2	03_004	Visit 5	Yes	23	156	27APR16	2 times	2 to 7 ounces or about 1 fillet or 4-14 pieces of sushi	No	No	< 30 minutes / day	Light	Week 24	03	Entered	56	Female	24NOV15	118	Placebo	<250 mg/day	No	No	>=250 mg/day	No	Yes	Yes	Yes	Yes
		Walking and gardening		Boiled shrimp	3	2	03_004	Visit 5	Yes	23	157	28APR16	2 times	2 to 7 ounces or about 1 fillet or 4-14 pieces of sushi	No	No	< 30 minutes / day	Light	Week 24	03	Entered	56	Female	24NOV15	118	Placebo	<250 mg/day	No	No	>=250 mg/day	No	Yes	Yes	Yes	Yes
		Walking and gardening		Boiled shrimp	3	2	03_004	Visit 5	Yes	23	158	29APR16	2 times	2 to 7 ounces or about 1 fillet or 4-14 pieces of sushi	No	No	< 30 minutes / day	Light	Week 24	03	Entered	56	Female	24NOV15	118	Placebo	<250 mg/day	No	No	>=250 mg/day	No	Yes	Yes	Yes	Yes
		Walking and gardening		Boiled shrimp	3	2	03_004	Visit 5	Yes	23	159	30APR16	2 times	2 to 7 ounces or about 1 fillet or 4-14 pieces of sushi	No	No	< 30 minutes / day	Light	Week 24	03	Entered	56	Female	24NOV15	118	Placebo	<250 mg/day	No	No	>=250 mg/day	No	Yes	Yes	Yes	Yes
		Walking and gardening		Boiled shrimp	3	2	03_004	Visit 5	Yes	23	160	01MAY16	2 times	2 to 7 ounces or about 1 fillet or 4-14 pieces of sushi	No	No	< 30 minutes / day	Light	Week 24	03	Entered	56	Female	24NOV15	118	Placebo	<250 mg/day	No	No	>=250 mg/day	No	Yes	Yes	Yes	Yes
		Walking			4	2	03_004	Visit 5	Yes	24	161	02MAY16	0 (not at all) (if 0, skip questions 2 and 3)		No	No	< 30 minutes / day	Light	Week 24	03	Entered	56	Female	24NOV15	118	Placebo	<250 mg/day	No	No	>=250 mg/day	No	Yes	Yes	Yes	Yes
		Walking			4	2	03_004	Visit 5	Yes	24	162	03MAY16	0 (not at all) (if 0, skip questions 2 and 3)		No	No	< 30 minutes / day	Light	Week 24	03	Entered	56	Female	24NOV15	118	Placebo	<250 mg/day	No	No	>=250 mg/day	No	Yes	Yes	Yes	Yes
		Walking			4	2	03_004	Visit 5	Yes	24	163	04MAY16	0 (not at all) (if 0, skip questions 2 and 3)		No	No	< 30 minutes / day	Light	Week 24	03	Entered	56	Female	24NOV15	118	Placebo	<250 mg/day	No	No	>=250 mg/day	No	Yes	Yes	Yes	Yes
		Walking			4	2	03_004	Visit 5	Yes	24	164	05MAY16	0 (not at all) (if 0, skip questions 2 and 3)		No	No	< 30 minutes / day	Light	Week 24	03	Entered	56	Female	24NOV15	118	Placebo	<250 mg/day	No	No	>=250 mg/day	No	Yes	Yes	Yes	Yes
		Walking			4	2	03_004	Visit 5	Yes	24	165	06MAY16	0 (not at all) (if 0, skip questions 2 and 3)		No	No	< 30 minutes / day	Light	Week 24	03	Entered	56	Female	24NOV15	118	Placebo	<250 mg/day	No	No	>=250 mg/day	No	Yes	Yes	Yes	Yes
		Walking			4	2	03_004	Visit 5	Yes	24	166	07MAY16	0 (not at all) (if 0, skip questions 2 and 3)		No	No	< 30 minutes / day	Light	Week 24	03	Entered	56	Female	24NOV15	118	Placebo	<250 mg/day	No	No	>=250 mg/day	No	Yes	Yes	Yes	Yes
		Walking			4	2	03_004	Visit 5	Yes	24	167	08MAY16	0 (not at all) (if 0, skip questions 2 and 3)		No	No	< 30 minutes / day	Light	Week 24	03	Entered	56	Female	24NOV15	118	Placebo	<250 mg/day	No	No	>=250 mg/day	No	Yes	Yes	Yes	Yes
							03_004	Visit 5	Yes	25	168	09MAY16							Week 24	03	Entered	56	Female	24NOV15	118	Placebo	<250 mg/day	No	No	>=250 mg/day	No	Yes	Yes	Yes	Yes
							03_004	Visit 5	Yes	25	169	10MAY16							Week 24	03	Entered	56	Female	24NOV15	118	Placebo	<250 mg/day	No	No	>=250 mg/day	No	Yes	Yes	Yes	Yes
							03_004	Visit 5	Yes	25	170	11MAY16							Week 24	03	Entered	56	Female	24NOV15	118	Placebo	<250 mg/day	No	No	>=250 mg/day	No	Yes	Yes	Yes	Yes
							03_004	Visit 5	Yes	25	171	12MAY16							Week 24	03	Entered	56	Female	24NOV15	118	Placebo	<250 mg/day	No	No	>=250 mg/day	No	Yes	Yes	Yes	Yes
							03_004	Visit 5	Yes	25	172	13MAY16							Week 24	03	Entered	56	Female	24NOV15	118	Placebo	<250 mg/day	No	No	>=250 mg/day	No	Yes	Yes	Yes	Yes
							03_004	Visit 5	Yes	25	173	14MAY16							Week 24	03	Entered	56	Female	24NOV15	118	Placebo	<250 mg/day	No	No	>=250 mg/day	No	Yes	Yes	Yes	Yes
				tapia	0	0	03_005	Visit 3	No	1	0	18NOV15	1 time	Less than 2 ounces or less than one fillet or less than 4 pieces of sushi	No	No	0 minutes (no exercise) / day		Week 6	03	Early Termination	49	Female	25NOV15	119	MF4637	>=250 mg/day	No	No	<250 mg/day	No	Yes	Yes	Yes	Yes
				tapia	0	0	03_005	Visit 3	Yes	1	1	19NOV15	1 time	Less than 2 ounces or less than one fillet or less than 4 pieces of sushi	No	No	0 minutes (no exercise) / day		Week 6	03	Early Termination	49	Female	25NOV15	119	MF4637	>=250 mg/day	No	No	<250 mg/day	No	Yes	Yes	Yes	Yes
				tapia	0	0	03_005	Visit 3	Yes	1	2	20NOV15	1 time	Less than 2 ounces or less than one fillet or less than 4 pieces of sushi	No	No	0 minutes (no exercise) / day		Week 6	03	Early Termination	49	Female	25NOV15	119	MF4637	>=250 mg/day	No	No	<250 mg/day	No	Yes	Yes	Yes	Yes
				tapia	0	0	03_005	Visit 3	Yes	1	3	21NOV15	1 time	Less than 2 ounces or less than one fillet or less than 4 pieces of sushi	No	No	0 minutes (no exercise) / day		Week 6	03	Early Termination	49	Female	25NOV15	119	MF4637	>=250 mg/day	No	No	<250 mg/day	No	Yes	Yes	Yes	Yes
				tapia	0	0	03_005	Visit 3	Yes	1	4	22NOV15	1 time	Less than 2 ounces or less than one fillet or less than 4 pieces of sushi	No	No	0 minutes (no exercise) / day		Week 6	03	Early Termination	49	Female	25NOV15	119	MF4637	>=250 mg/day	No	No	<250 mg/day	No	Yes	Yes	Yes	Yes
				tapia	0	0	03_005	Visit 3	Yes	1	5	23NOV15	1 time	Less than 2 ounces or less than one fillet or less than 4 pieces of sushi	No	No	0 minutes (no exercise) / day		Week 6	03	Early Termination	49	Female	25NOV15	119	MF4637	>=250 mg/day	No	No	<250 mg/day	No	Yes	Yes	Yes	Yes
				tapia	0	0	03_005	Visit 3	Yes	1	6	24NOV15	1 time	Less than 2 ounces or less than one fillet or less than 4 pieces of sushi	No	No	0 minutes (no exercise) / day		Week 6	03	Early Termination	49	Female	25NOV15	119	MF4637	>=250 mg/day	No	No	<250 mg/day	No	Yes	Yes	Yes	Yes
				fish	1	0	03_005	Visit 3	Yes	2	7	07NOV15	1 time	Less than 2 ounces or less than one fillet or less than 4 pieces of sushi	No	No	0 minutes (no exercise) / day		Week 6	03	Early Termination	49	Female	25NOV15	119	MF4637	>=250 mg/day	No	No	<250 mg/day	No	Yes	Yes	Yes	Yes
				fish	1	0	03_005	Visit 3	Yes	2	8	08NOV15	1 time	Less than 2 ounces or less than one fillet or less than 4 pieces of sushi	No	No	0 minutes (no exercise) / day		Week 6	03	Early Termination	49	Female	25NOV15	119	MF4637	>=250 mg/day	No	No	<250 mg/day	No	Yes	Yes	Yes	Yes
				fish	1	0	03_005	Visit 3	Yes	2	9	09NOV15	1 time	Less than 2 ounces or less than one fillet or less than 4 pieces of sushi	No	No	0 minutes (no exercise) / day		Week 6	03	Early Termination	49	Female	25NOV15	119	MF4637	>=250 mg/day	No	No	<250 mg/day	No	Yes	Yes	Yes	Yes
				fish	1	0	03_005	Visit 3	Yes	2	10	10NOV15	1 time	Less than 2 ounces or less than one fillet or less than 4 pieces of sushi	No	No	0 minutes (no exercise) / day		Week 6	03	Early Termination	49	Female	25NOV15	119	MF4637	>=250 mg/day	No	No	<250 mg/day	No	Yes	Yes	Yes	Yes
				fish	1	0	03_005	Visit 3	Yes	2	11	11NOV15	1 time	Less than 2 ounces or less than one fillet or less than 4 pieces of sushi	No	No	0 minutes (no exercise) / day		Week 6	03	Early Termination	49	Female	25NOV15	119	MF4637	>=250 mg/day	No	No	<250 mg/day	No	Yes	Yes	Yes	Yes
				fish	1	0	03_005	Visit 3	Yes	2	12	12NOV15	1 time	Less than 2 ounces or less than one fillet or less than 4 pieces of sushi	No	No	0 minutes (no exercise) / day		Week 6	03	Early Termination	49	Female	25NOV15	119	MF4637	>=250 mg/day	No	No	<250 mg/day	No	Yes	Yes	Yes	Yes
				fish	1	0	03_005	Visit 3	Yes	2	13	13NOV15	1 time	Less than 2 ounces or less than one fillet or less than 4 pieces of sushi	No	No	0 minutes (no exercise) / day		Week 6	03	Early Termination	49	Female	25NOV15	119	MF4637	>=250 mg/day	No	No	<250 mg/day	No	Yes	Yes	Yes	Yes
					0	0	03_005	Visit 3	Yes	3	14	25NOV15	0 (not at all) (if 0, skip questions 2 and 3)		No	No	0 minutes (no exercise) / day		Week 6	03	Early Termination	49	Female	25NOV15	119	MF4637	>=250 mg/day	No	No	<250 mg/day	No	Yes	Yes	Yes	Yes
					0	0	03_005	Visit 3	Yes	3	15	26NOV15	0 (not at all) (if 0, skip questions 2 and 3)		No	No	0 minutes (no exercise) / day		Week 6	03	Early Termination	49	Female	25NOV15	119	MF4637	>=250 mg/day	No	No	<250 mg/day	No	Yes	Yes	Yes	Yes
					0	0	03_005	Visit 3	Yes	3	16	27NOV15	0 (not at all) (if 0, skip questions 2 and 3)		No	No	0 minutes (no exercise) / day		Week 6	03	Early Termination	49	Female	25NOV15	119	MF4637	>=250 mg/day	No	No	<250 mg/day	No	Yes	Yes	Yes	Yes
					0	0	03_005	Visit 3	Yes	3	17	28NOV15	0 (not at all) (if 0, skip questions 2 and 3)		No	No	0 minutes (no exercise) / day		Week 6	03	Early Termination	49	Female	25NOV15	119	MF4637	>=250 mg/day	No	No	<250 mg/day	No	Yes	Yes	Yes	Yes
					0	0	03_005	Visit 3	Yes	3	18	29NOV15	0 (not at all) (if 0, skip questions 2 and 3)		No	No	0 minutes (no exercise) / day		Week 6	03	Early Termination	49	Female	25NOV15	119	MF4637	>=250 mg/day	No	No	<250 mg/day	No	Yes	Yes	Yes	Yes
					0	0	03_005	Visit 3	Yes	3	19	30NOV15	0 (not at all) (if 0, skip questions 2 and 3)		No	No	0 minutes (no exercise) / day		Week 6	03	Early Termination	49	Female	25NOV15	119	MF4637	>=250 mg/day	No	No	<250 mg/day	No	Yes	Yes	Yes	Yes
					0	0	03_005	Visit 3	Yes	3	20	01DEC15	0 (not at all) (if 0, skip questions 2 and 3)		No	No	0 minutes (no exercise) / day		Week 6	03	Early Termination	49	Female	25NOV15	119	MF4637	>=250 mg/day	No	No	<250 mg/day	No	Yes	Yes	Yes	Yes
					0	0	03_005	Visit 3	Yes	4	21	01DEC15	0 (not at all) (if 0, skip questions 2 and 3)		No	No	0 minutes (no exercise) / day		Week 6	03	Early Termination	49	Female	25NOV15	119	MF4637	>=250 mg/day	No	No	<250 mg/day	No	Yes	Yes	Yes	Yes
					0	0	03_005	Visit 3	Yes	4	22	02DEC15	0 (not at all) (if 0, skip questions 2 and 3)		No	No	0 minutes (no exercise) / day		Week 6	03	Early Termination	49	Female	25NOV15	119	MF4637	>=250 mg/day	No	No	<250 mg/day	No	Yes	Yes	Yes	Yes
					0	0	03_005	Visit 3	Yes	4	23	03DEC15	0 (not at all) (if 0, skip questions 2 and 3)		No	No	0 minutes (no exercise) / day		Week 6	03	Early Termination	49	Female	25NOV15	119	MF4637	>=250 mg/day	No	No	<250 mg/day	No	Yes	Yes	Yes	Yes
					0	0	03_005	Visit 3	Yes	4	24	04DEC15	0 (not at all) (if 0, skip questions 2 and 3)		No	No	0 minutes (no exercise) / day		Week 6	03	Early Termination	49	Female	25NOV15	119	MF4637	>=250 mg/day	No	No	<250 mg/day	No	Yes	Yes	Yes	Yes
					0	0	03_005	Visit 3	Yes	4	25	05DEC15	0 (not at all) (if 0, skip questions 2 and 3)		No	No	0 minutes (no exercise) / day		Week 6	03	Early Termination	49	Female	25NOV15	119	MF4637	>=250 mg/day	No	No	<250 mg/day	No	Yes	Yes	Yes	Yes
					0	0	03_005	Visit 3	Yes	4	26	06DEC15	0 (not at all) (if 0, skip questions 2 and 3)		No	No	0 minutes (no exercise) / day		Week 6	03	Early Termination	49	Female	25NOV15	119	MF4637	>=250 mg/day	No	No	<250 mg/day	No	Yes	Yes	Yes	Yes
					0	0	03_005	Visit 3	Yes	4	27	07DEC15	0 (not at all) (if 0, skip questions 2 and 3)		No	No	0 minutes (no exercise) / day		Week 6	03	Early Termination	49	Female	25NOV15	119	MF4637	>=250 mg/day	No	No	<250 mg/day	No	Yes	Yes	Yes	Yes
				fish	0	0	03_005	Visit 3	Yes	5	28	08DEC15	1 time	Less than 2 ounces or less than one fillet or less than 4 pieces of sushi	No	No	0 minutes (no exercise) / day		Week 6	03	Early Termination	49	Female	25NOV15	119	MF4637	>=250 mg/day	No	No	<250 mg/day	No	Yes	Yes	Yes	Yes
				fish	0	0	03_005	Visit 3	Yes	5	29	09DEC15	1 time	Less than 2 ounces or less than one fillet or less than 4 pieces of sushi	No	No	0 minutes (no exercise) / day		Week 6	03	Early Termination	49	Female	25NOV15	119	MF4637	>=250 mg/day	No	No	<250 mg/day	No	Yes	Yes	Yes	Yes
				fish	0	0	03_005	Visit 3	Yes	5	30	10DEC15	1 time	Less than 2 ounces or less than one fillet or less than 4 pieces of sushi	No	No	0 minutes (no exercise) / day		Week 6	03	Early Termination	49	Female	25NOV15	119	MF4637	>=250 mg/day	No	No	<250 mg/day	No	Yes	Yes	Yes	Yes
				fish	0	0	03_005	Visit 3	Yes	5	31	11DEC15	1 time	Less than 2 ounces or less than one fillet or less than 4 pieces of sushi	No	No	0 minutes (no exercise) / day		Week 6	03	Early Termination	49	Female	25NOV15	119	MF4637	>=250 mg/day	No	No	<250 mg/day	No	Yes	Yes	Yes	Yes
				fish	0	0	03_005	Visit 3	Yes	5	32	12DEC15	1 time	Less than 2 ounces or less than one fillet or less than 4 pieces of sushi	No	No	0 minutes (no exercise) / day		Week 6	03	Early Termination	49	Female	25NOV15	119	MF4637	>=250 mg/day	No	No	<250 mg/day	No	Yes	Yes	Yes	Yes
				fish	0	0	03_005	Visit 3	Yes	5	33	13DEC15	1 time	Less than 2 ounces or less than one fillet or less than 4 pieces of sushi	No	No	0 minutes (no exercise) / day		Week 6	03	Early Termination	49	Female	25NOV15	119	MF4637	>=250 mg/day	No	No	<250 mg/day	No	Yes	Yes	Yes	Yes
				fish	0	0	03_005	Visit 3	Yes	5	34	14DEC15	1 time	Less than 2 ounces or less than one fillet or less than 4 pieces of sushi	No	No	0 minutes (no exercise) / day		Week 6	03	Early Termination	49	Female	25NOV15	119	MF4637	>=250 mg/day	No	No	<250 mg/day	No	Yes	Yes	Yes	Yes
				shrimp	2	1	03_005	Visit 3	Yes	6	35	15DEC15	1 time	2 to 7 ounces or about 1 fillet or 4-14 pieces of sushi	No	No	0 minutes (no exercise) / day		Week 6	03	Early Termination	49	Female	25NOV15	119	MF4637	>=250 mg/day	No	No	<250 mg/day	No	Yes	Yes	Yes	Yes
				shrimp	2	1	03_005	Visit 3	Yes	6	36	16DEC15	1 time	2 to 7 ounces or about 1 fillet or 4-14 pieces of sushi	No	No	0 minutes (no exercise) / day		Week 6	03	Early Termination	49	Female	25NOV15	119	MF4637	>=250 mg/day	No	No	<250 mg/day	No	Yes	Yes	Yes	Yes
				shrimp	2	1	03_005	Visit 3	Yes	6	37	17DEC15	1 time	2 to 7 ounces or about 1 fillet or 4-14 pieces of sushi	No	No	0 minutes (no exercise) / day		Week 6	03	Early Termination	49	Female	25NOV15	119	MF4637	>=250 mg/day	No	No	<250 mg/day	No	Yes	Yes	Yes	Yes
				shrimp	2	1	03_005	Visit 3	Yes	6	38	18DEC15	1 time	2 to 7 ounces or about 1 fillet or 4-14 pieces of sushi	No	No	0 minutes (no exercise) / day		Week 6	03	Early Termination	49	Female	25NOV15	119	MF4637	>=250 mg/day	No	No	<250 mg/day	No	Yes	Yes	Yes	Yes
				shrimp	2	1	03_005	Visit 3	Yes	6	39	19DEC15	1 time	2 to 7 ounces or about 1 fillet or 4-14 pieces of sushi	No	No	0 minutes (no exercise) / day		Week 6	03	Early Termination	49	Female	25NOV15	119	MF4637	>=250 mg/day	No	No	<250 mg/day	No	Yes	Yes	Yes	Yes
				shrimp	2	1	03_005	Visit 3	Yes	6	40	20DEC15	1 time	2 to 7 ounces or about 1 fillet or 4-14 pieces of sushi	No	No	0 minutes (no exercise) / day		Week 6	03	Early Termination	49	Female	25NOV15	119	MF4637	>=250 mg/day	No	No	<250 mg/day	No	Yes	Yes	Yes	Yes
				shrimp	2	1	03_005	Visit 3	Yes	6	41	21DEC15	1 time	2 to 7 ounces or about 1 fillet or 4-14 pieces of sushi	No	No	0 minutes (no exercise) / day		Week 6	03	Early Termination	49	Female	25NOV15	119	MF4637	>=250 mg/day	No	No	<250 mg/day	No	Yes	Yes	Yes	Yes
				shrimp	1	0	03_005	Visit 4	Yes	7	42	22DEC15	1 time	Less than 2 ounces or less than one fillet or less than 4 pieces of sushi	No	No	0 minutes (no exercise) / day		Week 12	03	Early Termination	49	Female	25NOV15	119	MF4637	>=250 mg/day	No	No	<250 mg/day	No	Yes	Yes	Yes	Yes
				shrimp	1	0	03_005	Visit 4	Yes	7	43	23DEC15	1 time	Less than 2 ounces or less than one fillet or less than 4 pieces of sushi	No	No	0 minutes (no exercise) / day		Week 12	03	Early Termination	49	Female	25NOV15	119	MF4637	>=250 mg/day	No	No	<250 mg/day	No	Yes	Yes	Yes	Yes
				shrimp	1	0	03_005	Visit 4	Yes	7	44	24DEC15	1 time	Less than 2 ounces or less than one fillet or less than 4 pieces of sushi	No	No	0 minutes (no exercise) / day		Week 12	03	Early Termination	49	Female	25NOV15	119	MF4637	>=250 mg/day	No	No	<250 mg/day	No	Yes	Yes	Yes	Yes
				shrimp	1	0	03_005	Visit 4	Yes	7	45	25DEC15	1 time	Less than 2 ounces or less than one fillet or less than 4 pieces of sushi	No	No	0 minutes (no exercise) / day		Week 12	03	Early Termination	49	Female	25NOV15	119	MF4637	>=250 mg/day	No	No	<250 mg/day	No	Yes	Yes	Yes	Yes
				shrimp	1	0	03_005	Visit 4	Yes	7	46	26DEC15	1 time	Less than 2 ounces or less than one fillet or less than 4 pieces of sushi	No	No	0 minutes (no exercise) / day		Week 12	03	Early Termination	49	Female	25NOV15	119	MF4637	>=250 mg/day	No	No	<250 mg/day	No	Yes	Yes	Yes	Yes
				shrimp	1	0	03_005	Visit 4	No	7	47	27DEC15	1 time	Less than 2 ounces or less than one fillet or less than 4 pieces of sushi	No	No	0 minutes (no exercise) / day		Week 12	03	Early Termination	49	Female	25NOV15	119	MF4637	>=250 mg/day	No	No	<250 mg/day	No	Yes	Yes	Yes	Yes
				shrimp	1	0	03_005	Visit 4	Yes	7	48	28DEC15	1 time	Less than 2 ounces or less than one fillet or less than 4 pieces of sushi	No	No	0 minutes (no exercise) / day		Week 12	03	Early Termination	49	Female	25NOV15	119	MF4637	>=250 mg/day	No	No	<250 mg/day	No	Yes	Yes	Yes	Yes
					0	0	03_005	Visit 4	Yes	8	49	29DEC15	0 (not at all) (if 0, skip questions 2 and 3)		No	No	0 minutes (no exercise) / day		Week 12	03	Early Termination	49	Female	25NOV15	119	MF4637	>=250 mg/day	No	No	<250 mg/day	No	Yes	Yes	Yes	Yes
					0	0	03_005	Visit 4	Yes	8	50	30DEC15	0 (not at all) (if 0, skip questions 2 and 3)		No	No	0 minutes (no exercise) / day		Week 12	03	Early Termination	49	Female	25NOV15	119	MF4637	>=250 mg/day	No	No	<250 mg/day	No	Yes	Yes	Yes	Yes
					0	0	03_005	Visit 4	Yes	8	51	31DEC15	0 (not at all) (if 0, skip questions 2 and 3)		No	No	0 minutes (no exercise) / day		Week 12	03	Early Termination	49	Female	25NOV15	119	MF4637	>=250 mg/day	No	No	<250 mg/day	No	Yes	Yes	Yes	Yes
					0	0	03_005	Visit 4	Yes	8	52	01JAN16	0 (not at all) (if 0, skip questions 2 and 3)		No	No	0 minutes (no exercise) / day		Week 12	03	Early Termination	49	Female	25NOV15	119	MF4637	>=250 mg/day	No	No	<250 mg/day	No	Yes	Yes	Yes	Yes
					0	0	03_005	Visit 4	Yes	8	53	02JAN16	0 (not at all) (if 0, skip questions 2 and 3)		No	No	0 minutes (no exercise) / day		Week 12	03	Early Termination	49	Female	25NOV15	119	MF4637	>=250 mg/day	No	No	<250 mg/day	No	Yes	Yes	Yes	Yes
					0	0	03_005	Visit 4	Yes	8	54	03JAN16	0 (not at all) (if 0, skip questions 2 and 3)		No	No	0 minutes (no exercise) / day		Week 12	03	Early Termination	49	Female	25NOV15	119	MF4637	>=250 mg/day	No	No	<250 mg/day	No	Yes	Yes	Yes	Yes
					0	0	03_005	Visit 4	Yes	8	55	04JAN16	0 (not at all) (if 0, skip questions 2 and 3)		No	No	0 minutes (no exercise) / day		Week 12	03	Early Termination	49	Female	25NOV15	119	MF4637	>=250 mg/day	No	No	<250 mg/day	No	Yes	Yes	Yes	Yes
					0	0	03_005	Visit 4	Yes	9	56	05JAN16	0 (not at all) (if 0, skip questions 2 and 3)		No	No	0 minutes (no exercise) / day		Week 12	03	Early Termination	49	Female	25NOV15	119	MF4637	>=250 mg/day	No	No	<250 mg/day	No	Yes	Yes	Yes	Yes
					0	0	03_005	Visit 4	Yes	9	57	06JAN16	0 (not at all) (if 0, skip questions 2 and 3)		No	No	0 minutes (no exercise) / day		Week 12	03	Early Termination	49	Female	25NOV15	119	MF4637	>=250 mg/day	No	No	<250 mg/day	No	Yes	Yes	Yes	Yes
					0	0	03_005	Visit 4	Yes	9	58	07JAN16	0 (not at all) (if 0, skip questions 2 and 3)		No	No	0 minutes (no exercise) / day		Week 12	03	Early Termination	49	Female	25NOV15	119	MF4637	>=250 mg/day	No	No	<250 mg/day	No	Yes	Yes	Yes	Yes
					0	0	03_005	Visit 4	Yes	9	59	08JAN16	0 (not at all) (if 0, skip questions 2 and 3)		No	No	0 minutes (no exercise) / day		Week 12	03	Early Termination	49	Female	25NOV15	119	MF4637	>=250 mg/day	No	No	<250 mg/day	No	Yes	Yes	Yes	Yes
					0	0	03_005	Visit 4	Yes	9	60	09JAN16	0 (not at all) (if 0, skip questions 2 and 3)		No	No	0 minutes (no exercise) / day		Week 12	03	Early Termination	49	Female	25NOV15	119	MF4637	>=250 mg/day	No	No	<250 mg/day	No	Yes	Yes	Yes	Yes
					0	0	03_005	Visit 4	No	9	61	10JAN16	0 (not at all) (if 0, skip questions 2 and 3)		No	No	0 minutes (no exercise) / day		Week 12	03	Early Termination	49	Female	25NOV15	119	MF4637	>=250 mg/day	No	No	<250 mg/day	No	Yes	Yes	Yes	Yes
					0	0	03_005	Visit 4	Yes	9	62	11JAN16	0 (not at all) (if 0, skip questions 2 and 3)		No	No	0 minutes (no exercise) / day		Week 12	03	Early Termination	49	Female	25NOV15	119	MF4637	>=250 mg/day	No	No	<250 mg/day	No	Yes	Yes	Yes	Yes
					0	0	03_005	Visit 4	Yes	10	63	12JAN16	0 (not at all) (if 0, skip questions 2 and 3)		No	No	0 minutes (no exercise) / day		Week 12	03	Early Termination	49	Female	25NOV15	119	MF4637	>=250 mg/day	No	No	<250 mg/day	No	Yes	Yes	Yes	Yes
					0	0	03_005	Visit 4	Yes	10	64	13JAN16	0 (not at all) (if 0, skip questions 2 and 3)		No	No	0 minutes (no exercise) / day		Week 12	03	Early Termination	49	Female	25NOV15	119	MF4637	>=250 mg/day	No	No	<250 mg/day	No	Yes	Yes	Yes	Yes
					0	0	03_005	Visit 4	Yes	10	65	14JAN16	0 (not at all) (if 0, skip questions 2 and 3)		No	No	0 minutes (no exercise) / day		Week 12	03	Early Termination	49	Female	25NOV15	119	MF4637	>=250 mg/day	No	No	<250 mg/day	No	Yes	Yes	Yes	Yes
					0	0	03_005	Visit 4	Yes	10	66	15JAN16	0 (not at all) (if 0, skip questions 2 and 3)		No	No	0 minutes (no exercise) / day		Week 12	03	Early Termination	49	Female	25NOV15	119	MF4637	>=250 mg/day	No	No	<250 mg/day	No	Yes	Yes	Yes	Yes
					0	0	03_005	Visit 4	Yes	10	67	16JAN16	0 (not at all) (if 0, skip questions 2 and 3)		No	No	0 minutes (no exercise) / day		Week 12	03	Early Termination	49	Female	25NOV15	119	MF4637	>=250 mg/day	No	No	<250 mg/day	No	Yes	Yes	Yes	Yes
					0	0	03_005	Visit 4	Yes	10	68	17JAN16	0 (not at all) (if 0, skip questions 2 and 3)		No	No	0 minutes (no exercise) / day		Week 12	03	Early Termination	49	Female	25NOV15	119	MF4637	>=250 mg/day	No	No	<250 mg/day	No	Yes	Yes	Yes	Yes
					0	0	03_005	Visit 4	Yes	10	69	18JAN16	0 (not at all) (if 0, skip questions 2 and 3)		No	No	0 minutes (no exercise) / day		Week 12	03	Early Termination	49	Female	25NOV15	119	MF4637	>=250 mg/day	No	No	<250 mg/day	No	Yes	Yes	Yes	Yes
					0	0	03_005	Visit 4	Yes	11	70	19JAN16	0 (not at all) (if 0, skip questions 2 and 3)		No	No	0 minutes (no exercise) / day		Week 12	03	Early Termination	49	Female	25NOV15	119	MF4637	>=250 mg/day	No	No	<250 mg/day	No	Yes	Yes	Yes	Yes
					0	0	03_005	Visit 4	Yes	11	71	20JAN16	0 (not at all) (if 0, skip questions 2 and 3)		No	No	0 minutes (no exercise) / day		Week 12	03	Early Termination	49	Female	25NOV15	119	MF4637	>=250 mg/day	No	No	<250 mg/day	No	Yes	Yes	Yes	Yes
					0	0	03_005	Visit 4	Yes	11	72	21JAN16	0 (not at all) (if 0, skip questions 2 and 3)		No	No	0 minutes (no exercise) / day		Week 12	03	Early Termination	49	Female	25NOV15	119	MF4637	>=250 mg/day	No	No	<250 mg/day	No	Yes	Yes	Yes	Yes
					0	0	03_005	Visit 4	Yes	11	73	22JAN16	0 (not at all) (if 0, skip questions 2 and 3)		No	No	0 minutes (no exercise) / day		Week 12	03	Early Termination	49	Female	25NOV15	119	MF4637	>=250 mg/day	No	No	<250 mg/day	No	Yes	Yes	Yes	Yes
					0	0	03_005	Visit 4	Yes	11	74	23JAN16	0 (not at all) (if 0, skip questions 2 and 3)		No	No	0 minutes (no exercise) / day		Week 12	03	Early Termination	49	Female	25NOV15	119	MF4637	>=250 mg/day	No	No	<250 mg/day	No	Yes	Yes	Yes	Yes
					0	0	03_005	Visit 4	Yes	11	75	24JAN16	0 (not at all) (if 0, skip questions 2 and 3)		No	No	0 minutes (no exercise) / day		Week 12	03	Early Termination	49	Female	25NOV15	119	MF4637	>=250 mg/day	No	No	<250 mg/day	No	Yes	Yes	Yes	Yes
					0	0	03_005	Visit 4	No	11	76	25JAN16	0 (not at all) (if 0, skip questions 2 and 3)		No	No	0 minutes (no exercise) / day		Week 12	03	Early Termination	49	Female	25NOV15	119	MF4637	>=250 mg/day	No	No	<250 mg/day	No	Yes	Yes	Yes	Yes
				flaunder	0	2	03_005	Visit 4	Yes	12	77	26JAN16	1 time	2 to 7 ounces or about 1 fillet or 4-14 pieces of sushi	No	No	0 minutes (no exercise) / day		Week 12	03	Early Termination	49	Female	25NOV15	119	MF4637	>=250 mg/day	No	No	<250 mg/day	No	Yes	Yes	Yes	Yes
				flaunder	0	2	03_005	Visit 4	Yes	12	78	27JAN16	1 time	2 to 7 ounces or about 1 fillet or 4-14 pieces of sushi	No	No	0 minutes (no exercise) / day		Week 12	03	Early Termination	49	Female	25NOV15	119	MF4637	>=250 mg/day	No	No	<250 mg/day	No	Yes	Yes	Yes	Yes
				flaunder	0	2	03_005	Visit 4	Yes	12	79	28JAN16	1 time	2 to 7 ounces or about 1 fillet or 4-14 pieces of sushi	No	No	0 minutes (no exercise) / day		Week 12	03	Early Termination	49	Female	25NOV15	119	MF4637	>=250 mg/day	No	No	<250 mg/day	No	Yes	Yes	Yes	Yes
				flaunder	0	2	03_005	Visit 4	Yes	12	80	29JAN16	1 time	2 to 7 ounces or about 1 fillet or 4-14 pieces of sushi	No	No	0 minutes (no exercise) / day		Week 12	03	Early Termination	49	Female	25NOV15	119	MF4637	>=250 mg/day	No	No	<250 mg/day	No	Yes	Yes	Yes	Yes
				flaunder	0	2	03_005	Visit 4	Yes	12	81	30JAN16	1 time	2 to 7 ounces or about 1 fillet or 4-14 pieces of sushi	No	No	0 minutes (no exercise) / day		Week 12	03	Early Termination	49	Female	25NOV15	119	MF4637	>=250 mg/day	No	No	<250 mg/day	No	Yes	Yes	Yes	Yes
				flaunder	0	2	03_005	Visit 4	Yes	12	82	31JAN16	1 time	2 to 7 ounces or about 1 fillet or 4-14 pieces of sushi	No	No	0 minutes (no exercise) / day		Week 12	03	Early Termination	49	Female	25NOV15	119	MF4637	>=250 mg/day	No	No	<250 mg/day	No	Yes	Yes	Yes	Yes
				flaunder	0	2	03_005	Visit 4	Yes	12	83	01FEB16	1 time	2 to 7 ounces or about 1 fillet or 4-14 pieces of sushi	No	No	0 minutes (no exercise) / day		Week 12	03	Early Termination	49	Female	25NOV15	119	MF4637	>=250 mg/day	No	No	<250 mg/day	No	Yes	Yes	Yes	Yes
				shrimp	1	0	03_005	Visit 5	Yes	13	84	02FEB16	1 time	Less than 2 ounces or less than one fillet or less than 4 pieces of sushi	No	No	0 minutes (no exercise) / day		Week 24	03	Early Termination	49	Female	25NOV15	119	MF4637	>=250 mg/day	No	No	<250 mg/day	No	Yes	Yes	Yes	Yes
				shrimp	1	0	03_005	Visit 5	Yes	13	85	03FEB16	1 time	Less than 2 ounces or less than one fillet or less than 4 pieces of sushi	No	No	0 minutes (no exercise) / day		Week 24	03	Early Termination	49	Female	25NOV15	119	MF4637	>=250 mg/day	No	No	<250 mg/day	No	Yes	Yes	Yes	Yes
				shrimp	1	0	03_005	Visit 5	Yes	13	86	04FEB16	1 time	Less than 2 ounces or less than one fillet or less than 4 pieces of sushi	No	No	0 minutes (no exercise) / day		Week 24	03	Early Termination	49	Female	25NOV15	119	MF4637	>=250 mg/day	No	No	<250 mg/day	No	Yes	Yes	Yes	Yes
				shrimp	1	0	03_005	Visit 5	Yes	13	87	05FEB16	1 time	Less than 2 ounces or less than one fillet or less than 4 pieces of sushi	No	No	0 minutes (no exercise) / day		Week 24	03	Early Termination	49	Female	25NOV15	119	MF4637	>=250 mg/day	No	No	<250 mg/day	No	Yes	Yes	Yes	Yes
				shrimp	1	0	03_005	Visit 5	Yes	13	88	06FEB16	1 time	Less than 2 ounces or less than one fillet or less than 4 pieces of sushi	No	No	0 minutes (no exercise) / day		Week 24	03	Early Termination	49	Female	25NOV15	119	MF4637	>=250 mg/day	No	No	<250 mg/day	No	Yes	Yes	Yes	Yes
				shrimp	1	0	03_005	Visit 5	Yes	13	89	07FEB16	1 time	Less than 2 ounces or less than one fillet or less than 4 pieces of sushi	No	No	0 minutes (no exercise) / day		Week 24	03	Early Termination	49	Female	25NOV15	119	MF4637	>=250 mg/day	No	No	<250 mg/day	No	Yes	Yes	Yes	Yes
				shrimp	1	0	03_005	Visit 5	Yes	13	90	08FEB16	1 time	Less than 2 ounces or less than one fillet or less than 4 pieces of sushi	No	No	0 minutes (no exercise) / day		Week 24	03	Early Termination	49	Female	25NOV15	119	MF4637	>=250 mg/day	No	No	<250 mg/day	No	Yes	Yes	Yes	Yes
					0	0	03_005	Visit 5	Yes	14	91	09FEB16	0 (not at all) (if 0, skip questions 2 and 3)		No	No	0 minutes (no exercise) / day		Week 24	03	Early Termination	49	Female	25NOV15	119	MF4637	>=250 mg/day	No	No	<250 mg/day	No	Yes	Yes	Yes	Yes
					0	0	03_005	Visit 5	Yes	14	92	10FEB16	0 (not at all) (if 0, skip questions 2 and 3)		No	No	0 minutes (no exercise) / day		Week 24	03	Early Termination	49	Female	25NOV15	119	MF4637	>=250 mg/day	No	No	<250 mg/day	No	Yes	Yes	Yes	Yes
					0	0	03_005	Visit 5	Yes	14	93	11FEB16	0 (not at all) (if 0, skip questions 2 and 3)		No	No	0 minutes (no exercise) / day		Week 24	03	Early Termination	49	Female	25NOV15	119	MF4637	>=250 mg/day	No	No	<250 mg/day	No	Yes	Yes	Yes	Yes
					0	0	03_005	Visit 5	Yes	14	94	12FEB16	0 (not at all) (if 0, skip questions 2 and 3)		No	No	0 minutes (no exercise) / day		Week 24	03	Early Termination	49	Female	25NOV15	119	MF4637	>=250 mg/day	No	No	<250 mg/day	No	Yes	Yes	Yes	Yes
					0	0	03_005	Visit 5	Yes	14	95	13FEB16	0 (not at all) (if 0, skip questions 2 and 3)		No	No	0 minutes (no exercise) / day		Week 24	03	Early Termination	49	Female	25NOV15	119	MF4637	>=250 mg/day	No	No	<250 mg/day	No	Yes	Yes	Yes	Yes
					0	0	03_005	Visit 5	Yes	14	96	14FEB16	0 (not at all) (if 0, skip questions 2 and 3)		No	No	0 minutes (no exercise) / day		Week 24	03	Early Termination	49	Female	25NOV15	119	MF4637	>=250 mg/day	No	No	<250 mg/day	No	Yes	Yes	Yes	Yes
					0	0	03_005	Visit 5	Yes	14	97	15FEB16	0 (not at all) (if 0, skip questions 2 and 3)		No	No	0 minutes (no exercise) / day		Week 24	03	Early Termination	49	Female	25NOV15	119	MF4637	>=250 mg/day	No	No	<250 mg/day	No	Yes	Yes	Yes	Yes
				shrimp fish	1	0	03_005	Visit 5	Yes	15	98	16FEB16	2 times	More than 7 ounces or more than 1 fillet or more than 14 pieces of sushi	No	No	0 minutes (no exercise) / day		Week 24	03	Early Termination	49	Female	25NOV15	119	MF4637	>=250 mg/day	No	No	<250 mg/day	No	Yes	Yes	Yes	Yes
				shrimp fish	1	0	03_005	Visit 5	Yes	15	99	17FEB16	2 times	More than 7 ounces or more than 1 fillet or more than 14 pieces of sushi	No	No	0 minutes (no exercise) / day		Week 24	03	Early Termination	49	Female	25NOV15	119	MF4637	>=250 mg/day	No	No	<250 mg/day	No	Yes	Yes	Yes	Yes
				shrimp fish	1	0	03_005	Visit 5	Yes	15	100	18FEB16	2 times	More than 7 ounces or more than 1 fillet or more than 14 pieces of sushi	No	No	0 minutes (no exercise) / day		Week 24	03	Early Termination	49	Female	25NOV15	119	MF4637	>=250 mg/day	No	No	<250 mg/day	No	Yes	Yes	Yes	Yes
				shrimp fish	1	0	03_005	Visit 5	Yes	15	101	19FEB16	2 times	More than 7 ounces or more than 1 fillet or more than 14 pieces of sushi	No	No	0 minutes (no exercise) / day		Week 24	03	Early Termination	49	Female	25NOV15	119	MF4637	>=250 mg/day	No	No	<250 mg/day	No	Yes	Yes	Yes	Yes
				shrimp fish	1	0	03_005	Visit 5	Yes	15	102	20FEB16	2 times	More than 7 ounces or more than 1 fillet or more than 14 pieces of sushi	No	No	0 minutes (no exercise) / day		Week 24	03	Early Termination	49	Female	25NOV15	119	MF4637	>=250 mg/day	No	No	<250 mg/day	No	Yes	Yes	Yes	Yes
				shrimp fish	1	0	03_005	Visit 5	Yes	15	103	21FEB16	2 times	More than 7 ounces or more than 1 fillet or more than 14 pieces of sushi	No	No	0 minutes (no exercise) / day		Week 24	03	Early Termination	49	Female	25NOV15	119	MF4637	>=250 mg/day	No	No	<250 mg/day	No	Yes	Yes	Yes	Yes
				shrimp fish	1	0	03_005	Visit 5	Yes	15	104	22FEB16	2 times	More than 7 ounces or more than 1 fillet or more than 14 pieces of sushi	No	No	0 minutes (no exercise) / day		Week 24	03	Early Termination	49	Female	25NOV15	119	MF4637	>=250 mg/day	No	No	<250 mg/day	No	Yes	Yes	Yes	Yes
				fish	1	0	03_005	Visit 5	Yes	16	105	23FEB16	2 times	Less than 2 ounces or less than one fillet or less than 4 pieces of sushi	No	No	0 minutes (no exercise) / day		Week 24	03	Early Termination	49	Female	25NOV15	119	MF4637	>=250 mg/day	No	No	<250 mg/day	No	Yes	Yes	Yes	Yes
				fish	1	0	03_005	Visit 5	Yes	16	106	24FEB16	2 times	Less than 2 ounces or less than one fillet or less than 4 pieces of sushi	No	No	0 minutes (no exercise) / day		Week 24	03	Early Termination	49	Female	25NOV15	119	MF4637	>=250 mg/day	No	No	<250 mg/day	No	Yes	Yes	Yes	Yes
				fish	1	0	03_005	Visit 5	No	16	107	25FEB16	2 times	Less than 2 ounces or less than one fillet or less than 4 pieces of sushi	No	No	0 minutes (no exercise) / day		Week 24	03	Early Termination	49	Female	25NOV15	119	MF4637	>=250 mg/day	No	No	<250 mg/day	No	Yes	Yes	Yes	Yes
				fish	1	0	03_005	Visit 5	Yes	16	108	26FEB16	2 times	Less than 2 ounces or less than one fillet or less than 4 pieces of sushi	No	No	0 minutes (no exercise) / day		Week 24	03	Early Termination	49	Female	25NOV15	119	MF4637	>=250 mg/day	No	No	<250 mg/day	No	Yes	Yes	Yes	Yes
				fish	1	0	03_005	Visit 5	Yes	16	109	27FEB16	2 times	Less than 2 ounces or less than one fillet or less than 4 pieces of sushi	No	No	0 minutes (no exercise) / day		Week 24	03	Early Termination	49	Female	25NOV15	119	MF4637	>=250 mg/day	No	No	<250 mg/day	No	Yes	Yes	Yes	Yes
				fish	1	0	03_005	Visit 5	Yes	16	110	28FEB16	2 times	Less than 2 ounces or less than one fillet or less than 4 pieces of sushi	No	No	0 minutes (no exercise) / day		Week 24	03	Early Termination	49	Female	25NOV15	119	MF4637	>=250 mg/day	No	No	<250 mg/day	No	Yes	Yes	Yes	Yes
				fish	1	0	03_005	Visit 5	Yes	16	111	29FEB16	2 times	Less than 2 ounces or less than one fillet or less than 4 pieces of sushi	No	No	0 minutes (no exercise) / day		Week 24	03	Early Termination	49	Female	25NOV15	119	MF4637	>=250 mg/day	No	No	<250 mg/day	No	Yes	Yes	Yes	Yes
					0	0	03_005	Visit 5	Yes	17	112	29FEB16	0 (not at all) (if 0, skip questions 2 and 3)		No	No	0 minutes (no exercise) / day		Week 24	03	Early Termination	49	Female	25NOV15	119	MF4637	>=250 mg/day	No	No	<250 mg/day	No	Yes	Yes	Yes	Yes
					0	0	03_005	Visit 5	Yes	17	113	01MAR16	0 (not at all) (if 0, skip questions 2 and 3)		No	No	0 minutes (no exercise) / day		Week 24	03	Early Termination	49	Female	25NOV15	119	MF4637	>=250 mg/day	No	No	<250 mg/day	No	Yes	Yes	Yes	Yes
					0	0	03_005	Visit 5	Yes	17	114	02MAR16	0 (not at all) (if 0, skip questions 2 and 3)		No	No	0 minutes (no exercise) / day		Week 24	03	Early Termination	49	Female	25NOV15	119	MF4637	>=250 mg/day	No	No	<250 mg/day	No	Yes	Yes	Yes	Yes
					0	0	03_005	Visit 5	Yes	17	115	03MAR16	0 (not at all) (if 0, skip questions 2 and 3)		No	No	0 minutes (no exercise) / day		Week 24	03	Early Termination	49	Female	25NOV15	119	MF4637	>=250 mg/day	No	No	<250 mg/day	No	Yes	Yes	Yes	Yes
					0	0	03_005	Visit 5	Yes	17	116	04MAR16	0 (not at all) (if 0, skip questions 2 and 3)		No	No	0 minutes (no exercise) / day		Week 24	03	Early Termination	49	Female	25NOV15	119	MF4637	>=250 mg/day	No	No	<250 mg/day	No	Yes	Yes	Yes	Yes
					0	0	03_005	Visit 5	Yes	17	117	05MAR16	0 (not at all) (if 0, skip questions 2 and 3)		No	No	0 minutes (no exercise) / day		Week 24	03	Early Termination	49	Female	25NOV15	119	MF4637	>=250 mg/day	No	No	<250 mg/day	No	Yes	Yes	Yes	Yes
					0	0	03_005	Visit 5	Yes	17	118	06MAR16	0 (not at all) (if 0, skip questions 2 and 3)		No	No	0 minutes (no exercise) / day		Week 24	03	Early Termination	49	Female	25NOV15	119	MF4637	>=250 mg/day	No	No	<250 mg/day	No	Yes	Yes	Yes	Yes
				tuna	1	1	03_005	Visit 5	No	18	119	07MAR16	1 time	2 to 7 ounces or about 1 fillet or 4-14 pieces of sushi	No	No	0 minutes (no exercise) / day		Week 24	03	Early Termination	49	Female	25NOV15	119	MF4637	>=250 mg/day	No	No	<250 mg/day	No	Yes	Yes	Yes	Yes
				tuna	1	1	03_005	Visit 5	Yes	18	120	08MAR16	1 time	2 to 7 ounces or about 1 fillet or 4-14 pieces of sushi	No	No	0 minutes (no exercise) / day		Week 24	03	Early Termination	49	Female	25NOV15	119	MF4637	>=250 mg/day	No	No	<250 mg/day	No	Yes	Yes	Yes	Yes
				tuna	1	1	03_005	Visit 5	Yes	18	121	09MAR16	1 time	2 to 7 ounces or about 1 fillet or 4-14 pieces of sushi	No	No	0 minutes (no exercise) / day		Week 24	03	Early Termination	49	Female	25NOV15	119	MF4637	>=250 mg/day	No	No	<250 mg/day	No	Yes	Yes	Yes	Yes
				tuna	1	1	03_005	Visit 5	Yes	18	122	10MAR16	1 time	2 to 7 ounces or about 1 fillet or 4-14 pieces of sushi	No	No	0 minutes (no exercise) / day		Week 24	03	Early Termination	49	Female	25NOV15	119	MF4637	>=250 mg/day	No	No	<250 mg/day	No	Yes	Yes	Yes	Yes
				tuna	1	1	03_005	Visit 5	Yes	18	123	11MAR16	1 time	2 to 7 ounces or about 1 fillet or 4-14 pieces of sushi	No	No	0 minutes (no exercise) / day		Week 24	03	Early Termination	49	Female	25NOV15	119	MF4637	>=250 mg/day	No	No	<250 mg/day	No	Yes	Yes	Yes	Yes
				tuna	1	1	03_005	Visit 5	Yes	18	124	12MAR16	1 time	2 to 7 ounces or about 1 fillet or 4-14 pieces of sushi	No	No	0 minutes (no exercise) / day		Week 24	03	Early Termination	49	Female	25NOV15	119	MF4637	>=250 mg/day	No	No	<250 mg/day	No	Yes	Yes	Yes	Yes
				tuna	1	1	03_005	Visit 5	Yes	18	125	13MAR16	1 time	2 to 7 ounces or about 1 fillet or 4-14 pieces of sushi	No	No	0 minutes (no exercise) / day		Week 24	03	Early Termination	49	Female	25NOV15	119	MF4637	>=250 mg/day	No	No	<250 mg/day	No	Yes	Yes	Yes	Yes
					0	0	03_005	Visit 5	Yes	19	126	21MAR16	0 (not at all) (if 0, skip questions 2 and 3)		No	No	0 minutes (no exercise) / day		Week 24	03	Early Termination	49	Female	25NOV15	119	MF4637	>=250 mg/day	No	No	<250 mg/day	No	Yes	Yes	Yes	Yes
					0	0	03_005	Visit 5	Yes	19	127	22MAR16	0 (not at all) (if 0, skip questions 2 and 3)		No	No	0 minutes (no exercise) / day		Week 24	03	Early Termination	49	Female	25NOV15	119	MF4637	>=250 mg/day	No	No	<250 mg/day	No	Yes	Yes	Yes	Yes
			subject stopped meds		0	0	03_005	Visit 5	No	19	128	23MAR16	0 (not at all) (if 0, skip questions 2 and 3)		No	No	0 minutes (no exercise) / day		Week 24	03	Early Termination	49	Female	25NOV15	119	MF4637	>=250 mg/day	No	No	<250 mg/day	No	Yes	Yes	Yes	Yes
					0	0	03_005	Visit 5	No	19	129	24MAR16	0 (not at all) (if 0, skip questions 2 and 3)		No	No	0 minutes (no exercise) / day		Week 24	03	Early Termination	49	Female	25NOV15	119	MF4637	>=250 mg/day	No	No	<250 mg/day	No	Yes	Yes	Yes	Yes
					0	0	03_005	Visit 5	No	19	130	25MAR16	0 (not at all) (if 0, skip questions 2 and 3)		No	No	0 minutes (no exercise) / day		Week 24	03	Early Termination	49	Female	25NOV15	119	MF4637	>=250 mg/day	No	No	<250 mg/day	No	Yes	Yes	Yes	Yes
					0	0	03_005	Visit 5	No	19	131	26MAR16	0 (not at all) (if 0, skip questions 2 and 3)		No	No	0 minutes (no exercise) / day		Week 24	03	Early Termination	49	Female	25NOV15	119	MF4637	>=250 mg/day	No	No	<250 mg/day	No	Yes	Yes	Yes	Yes
			pt stopped meds		0	0	03_005	Visit 5	No	19	132	27MAR16	0 (not at all) (if 0, skip questions 2 and 3)		No	No	0 minutes (no exercise) / day		Week 24	03	Early Termination	49	Female	25NOV15	119	MF4637	>=250 mg/day	No	No	<250 mg/day	No	Yes	Yes	Yes	Yes
no fast food		walking		salmon and shrimp	1	1	03_007	Visit 3	No	1	0	24NOV15	More than 2 times	More than 7 ounces or more than 1 fillet or more than 14 pieces of sushi	Yes	No	< 30 minutes / day	Light	Week 6	03	Entered	40	Male	19NOV15	120	Placebo	<250 mg/day	No	No	<250 mg/day	No	Yes	Yes	Yes	No
no fast food		walking		salmon and shrimp	1	1	03_007	Visit 3	Yes	1	1	25NOV15	More than 2 times	More than 7 ounces or more than 1 fillet or more than 14 pieces of sushi	Yes	No	< 30 minutes / day	Light	Week 6	03	Entered	40	Male	19NOV15	120	Placebo	<250 mg/day	No	No	<250 mg/day	No	Yes	Yes	Yes	No
no fast food		walking		salmon and shrimp	1	1	03_007	Visit 3	Yes	1	2	26NOV15	More than 2 times	More than 7 ounces or more than 1 fillet or more than 14 pieces of sushi	Yes	No	< 30 minutes / day	Light	Week 6	03	Entered	40	Male	19NOV15	120	Placebo	<250 mg/day	No	No	<250 mg/day	No	Yes	Yes	Yes	No
no fast food		walking		salmon and shrimp	1	1	03_007	Visit 3	Yes	1	3	27NOV15	More than 2 times	More than 7 ounces or more than 1 fillet or more than 14 pieces of sushi	Yes	No	< 30 minutes / day	Light	Week 6	03	Entered	40	Male	19NOV15	120	Placebo	<250 mg/day	No	No	<250 mg/day	No	Yes	Yes	Yes	No
no fast food		walking		salmon and shrimp	1	1	03_007	Visit 3	Yes	1	4	28NOV15	More than 2 times	More than 7 ounces or more than 1 fillet or more than 14 pieces of sushi	Yes	No	< 30 minutes / day	Light	Week 6	03	Entered	40	Male	19NOV15	120	Placebo	<250 mg/day	No	No	<250 mg/day	No	Yes	Yes	Yes	No
no fast food		walking		salmon and shrimp	1	1	03_007	Visit 3	Yes	1	5	29NOV15	More than 2 times	More than 7 ounces or more than 1 fillet or more than 14 pieces of sushi	Yes	No	< 30 minutes / day	Light	Week 6	03	Entered	40	Male	19NOV15	120	Placebo	<250 mg/day	No	No	<250 mg/day	No	Yes	Yes	Yes	No
no fast food		walking		salmon and shrimp	1	1	03_007	Visit 3	Yes	1	6	30NOV15	More than 2 times	More than 7 ounces or more than 1 fillet or more than 14 pieces of sushi	Yes	No	< 30 minutes / day	Light	Week 6	03	Entered	40	Male	19NOV15	120	Placebo	<250 mg/day	No	No	<250 mg/day	No	Yes	Yes	Yes	No
tryied no snacking		walking		salmon shrimp tilapia	0	0	03_007	Visit 3	Yes	2	7	01DEC15	More than 2 times	More than 7 ounces or more than 1 fillet or more than 14 pieces of sushi	Yes	No	< 30 minutes / day	Light	Week 6	03	Entered	40	Male	19NOV15	120	Placebo	<250 mg/day	No	No	<250 mg/day	No	Yes	Yes	Yes	No
tryied no snacking		walking		salmon shrimp tilapia	0	0	03_007	Visit 3	Yes	2	8	02DEC15	More than 2 times	More than 7 ounces or more than 1 fillet or more than 14 pieces of sushi	Yes	No	< 30 minutes / day	Light	Week 6	03	Entered	40	Male	19NOV15	120	Placebo	<250 mg/day	No	No	<250 mg/day	No	Yes	Yes	Yes	No
tryied no snacking		walking		salmon shrimp tilapia	0	0	03_007	Visit 3	Yes	2	9	03DEC15	More than 2 times	More than 7 ounces or more than 1 fillet or more than 14 pieces of sushi	Yes	No	< 30 minutes / day	Light	Week 6	03	Entered	40	Male	19NOV15	120	Placebo	<250 mg/day	No	No	<250 mg/day	No	Yes	Yes	Yes	No
tryied no snacking		walking		salmon shrimp tilapia	0	0	03_007	Visit 3	Yes	2	10	04DEC15	More than 2 times	More than 7 ounces or more than 1 fillet or more than 14 pieces of sushi	Yes	No	< 30 minutes / day	Light	Week 6	03	Entered	40	Male	19NOV15	120	Placebo	<250 mg/day	No	No	<250 mg/day	No	Yes	Yes	Yes	No
tryied no snacking		walking		salmon shrimp tilapia	0	0	03_007	Visit 3	Yes	2	11	05DEC15	More than 2 times	More than 7 ounces or more than 1 fillet or more than 14 pieces of sushi	Yes	No	< 30 minutes / day	Light	Week 6	03	Entered	40	Male	19NOV15	120	Placebo	<250 mg/day	No	No	<250 mg/day	No	Yes	Yes	Yes	No
tryied no snacking		walking		salmon shrimp tilapia	0	0	03_007	Visit 3	Yes	2	12	06DEC15	More than 2 times	More than 7 ounces or more than 1 fillet or more than 14 pieces of sushi	Yes	No	< 30 minutes / day	Light	Week 6	03	Entered	40	Male	19NOV15	120	Placebo	<250 mg/day	No	No	<250 mg/day	No	Yes	Yes	Yes	No
tryied no snacking		walking		salmon shrimp tilapia	0	0	03_007	Visit 3	Yes	2	13	07DEC15	More than 2 times	More than 7 ounces or more than 1 fillet or more than 14 pieces of sushi	Yes	No	< 30 minutes / day	Light	Week 6	03	Entered	40	Male	19NOV15	120	Placebo	<250 mg/day	No	No	<250 mg/day	No	Yes	Yes	Yes	No
				sushi salmon	0	0	03_007	Visit 3	Yes	3	14	08DEC15	2 times	2 to 7 ounces or about 1 fillet or 4-14 pieces of sushi	No	No	0 minutes (no exercise) / day		Week 6	03	Entered	40	Male	19NOV15	120	Placebo	<250 mg/day	No	No	<250 mg/day	No	Yes	Yes	Yes	No
				sushi salmon	0	0	03_007	Visit 3	Yes	3	15	09DEC15	2 times	2 to 7 ounces or about 1 fillet or 4-14 pieces of sushi	No	No	0 minutes (no exercise) / day		Week 6	03	Entered	40	Male	19NOV15	120	Placebo	<250 mg/day	No	No	<250 mg/day	No	Yes	Yes	Yes	No
				sushi salmon	0	0	03_007	Visit 3	Yes	3	16	10DEC15	2 times	2 to 7 ounces or about 1 fillet or 4-14 pieces of sushi	No	No	0 minutes (no exercise) / day		Week 6	03	Entered	40	Male	19NOV15	120	Placebo	<250 mg/day	No	No	<250 mg/day	No	Yes	Yes	Yes	No
				sushi salmon	0	0	03_007	Visit 3	Yes	3	17	11DEC15	2 times	2 to 7 ounces or about 1 fillet or 4-14 pieces of sushi	No	No	0 minutes (no exercise) / day		Week 6	03	Entered	40	Male	19NOV15	120	Placebo	<250 mg/day	No	No	<250 mg/day	No	Yes	Yes	Yes	No
				sushi salmon	0	0	03_007	Visit 3	Yes	3	18	12DEC15	2 times	2 to 7 ounces or about 1 fillet or 4-14 pieces of sushi	No	No	0 minutes (no exercise) / day		Week 6	03	Entered	40	Male	19NOV15	120	Placebo	<250 mg/day	No	No	<250 mg/day	No	Yes	Yes	Yes	No
				sushi salmon	0	0	03_007	Visit 3	Yes	3	19	13DEC15	2 times	2 to 7 ounces or about 1 fillet or 4-14 pieces of sushi	No	No	0 minutes (no exercise) / day		Week 6	03	Entered	40	Male	19NOV15	120	Placebo	<250 mg/day	No	No	<250 mg/day	No	Yes	Yes	Yes	No
				sushi salmon	0	0	03_007	Visit 3	Yes	3	20	14DEC15	2 times	2 to 7 ounces or about 1 fillet or 4-14 pieces of sushi	No	No	0 minutes (no exercise) / day		Week 6	03	Entered	40	Male	19NOV15	120	Placebo	<250 mg/day	No	No	<250 mg/day	No	Yes	Yes	Yes	No
		walking lifted weights		salmon shrimp sushi	1	1	03_007	Visit 3	Yes	4	21	22DEC15	More than 2 times	More than 7 ounces or more than 1 fillet or more than 14 pieces of sushi	No	No	< 30 minutes / day	Moderate	Week 6	03	Entered	40	Male	19NOV15	120	Placebo	<250 mg/day	No	No	<250 mg/day	No	Yes	Yes	Yes	No
		walking lifted weights		salmon shrimp sushi	1	1	03_007	Visit 3	Yes	4	22	23DEC15	More than 2 times	More than 7 ounces or more than 1 fillet or more than 14 pieces of sushi	No	No	< 30 minutes / day	Moderate	Week 6	03	Entered	40	Male	19NOV15	120	Placebo	<250 mg/day	No	No	<250 mg/day	No	Yes	Yes	Yes	No
		walking lifted weights		salmon shrimp sushi	1	1	03_007	Visit 3	Yes	4	23	24DEC15	More than 2 times	More than 7 ounces or more than 1 fillet or more than 14 pieces of sushi	No	No	< 30 minutes / day	Moderate	Week 6	03	Entered	40	Male	19NOV15	120	Placebo	<250 mg/day	No	No	<250 mg/day	No	Yes	Yes	Yes	No
		walking lifted weights		salmon shrimp sushi	1	1	03_007	Visit 3	Yes	4	24	25DEC15	More than 2 times	More than 7 ounces or more than 1 fillet or more than 14 pieces of sushi	No	No	< 30 minutes / day	Moderate	Week 6	03	Entered	40	Male	19NOV15	120	Placebo	<250 mg/day	No	No	<250 mg/day	No	Yes	Yes	Yes	No
		walking lifted weights		salmon shrimp sushi	1	1	03_007	Visit 3	Yes	4	25	26DEC15	More than 2 times	More than 7 ounces or more than 1 fillet or more than 14 pieces of sushi	No	No	< 30 minutes / day	Moderate	Week 6	03	Entered	40	Male	19NOV15	120	Placebo	<250 mg/day	No	No	<250 mg/day	No	Yes	Yes	Yes	No
		walking lifted weights		salmon shrimp sushi	1	1	03_007	Visit 3	Yes	4	26	27DEC15	More than 2 times	More than 7 ounces or more than 1 fillet or more than 14 pieces of sushi	No	No	< 30 minutes / day	Moderate	Week 6	03	Entered	40	Male	19NOV15	120	Placebo	<250 mg/day	No	No	<250 mg/day	No	Yes	Yes	Yes	No
		walking lifted weights		salmon shrimp sushi	1	1	03_007	Visit 3	Yes	4	27	28DEC15	More than 2 times	More than 7 ounces or more than 1 fillet or more than 14 pieces of sushi	No	No	< 30 minutes / day	Moderate	Week 6	03	Entered	40	Male	19NOV15	120	Placebo	<250 mg/day	No	No	<250 mg/day	No	Yes	Yes	Yes	No
		WALKING			0	0	03_007	Visit 3	Yes	5	28	22DEC15	0 (not at all) (if 0, skip questions 2 and 3)		No	No	< 30 minutes / day	Moderate	Week 6	03	Entered	40	Male	19NOV15	120	Placebo	<250 mg/day	No	No	<250 mg/day	No	Yes	Yes	Yes	No
		WALKING			0	0	03_007	Visit 3	Yes	5	29	23DEC15	0 (not at all) (if 0, skip questions 2 and 3)		No	No	< 30 minutes / day	Moderate	Week 6	03	Entered	40	Male	19NOV15	120	Placebo	<250 mg/day	No	No	<250 mg/day	No	Yes	Yes	Yes	No
		WALKING	12/25/2015		0	0	03_007	Visit 3	Yes	5	30	24DEC15	0 (not at all) (if 0, skip questions 2 and 3)		No	No	< 30 minutes / day	Moderate	Week 6	03	Entered	40	Male	19NOV15	120	Placebo	<250 mg/day	No	No	<250 mg/day	No	Yes	Yes	Yes	No
		WALKING	not to day yet		0	0	03_007	Visit 3	No	5	31	25DEC15	0 (not at all) (if 0, skip questions 2 and 3)		No	No	< 30 minutes / day	Moderate	Week 6	03	Entered	40	Male	19NOV15	120	Placebo	<250 mg/day	No	No	<250 mg/day	No	Yes	Yes	Yes	No
		WALKING	not to day yet		0	0	03_007	Visit 3	No	5	32	26DEC15	0 (not at all) (if 0, skip questions 2 and 3)		No	No	< 30 minutes / day	Moderate	Week 6	03	Entered	40	Male	19NOV15	120	Placebo	<250 mg/day	No	No	<250 mg/day	No	Yes	Yes	Yes	No
		WALKING	not to day yet		0	0	03_007	Visit 3	No	5	33	27DEC15	0 (not at all) (if 0, skip questions 2 and 3)		No	No	< 30 minutes / day	Moderate	Week 6	03	Entered	40	Male	19NOV15	120	Placebo	<250 mg/day	No	No	<250 mg/day	No	Yes	Yes	Yes	No
		WALKING	not here yet		0	0	03_007	Visit 3	No	5	34	28DEC15	0 (not at all) (if 0, skip questions 2 and 3)		No	No	< 30 minutes / day	Moderate	Week 6	03	Entered	40	Male	19NOV15	120	Placebo	<250 mg/day	No	No	<250 mg/day	No	Yes	Yes	Yes	No
				salmon shrimp	0	0	03_007	Visit 3	Yes	6	35	29DEC15	More than 2 times	More than 7 ounces or more than 1 fillet or more than 14 pieces of sushi	No	No	0 minutes (no exercise) / day		Week 6	03	Entered	40	Male	19NOV15	120	Placebo	<250 mg/day	No	No	<250 mg/day	No	Yes	Yes	Yes	No
				salmon shrimp	0	0	03_007	Visit 3	Yes	6	36	30DEC15	More than 2 times	More than 7 ounces or more than 1 fillet or more than 14 pieces of sushi	No	No	0 minutes (no exercise) / day		Week 6	03	Entered	40	Male	19NOV15	120	Placebo	<250 mg/day	No	No	<250 mg/day	No	Yes	Yes	Yes	No
				salmon shrimp	0	0	03_007	Visit 3	Yes	6	37	31DEC15	More than 2 times	More than 7 ounces or more than 1 fillet or more than 14 pieces of sushi	No	No	0 minutes (no exercise) / day		Week 6	03	Entered	40	Male	19NOV15	120	Placebo	<250 mg/day	No	No	<250 mg/day	No	Yes	Yes	Yes	No
				salmon shrimp	0	0	03_007	Visit 3	Yes	6	38	01JAN16	More than 2 times	More than 7 ounces or more than 1 fillet or more than 14 pieces of sushi	No	No	0 minutes (no exercise) / day		Week 6	03	Entered	40	Male	19NOV15	120	Placebo	<250 mg/day	No	No	<250 mg/day	No	Yes	Yes	Yes	No
				salmon shrimp	0	0	03_007	Visit 3	Yes	6	39	02JAN16	More than 2 times	More than 7 ounces or more than 1 fillet or more than 14 pieces of sushi	No	No	0 minutes (no exercise) / day		Week 6	03	Entered	40	Male	19NOV15	120	Placebo	<250 mg/day	No	No	<250 mg/day	No	Yes	Yes	Yes	No
				salmon shrimp	0	0	03_007	Visit 3	Yes	6	40	03JAN16	More than 2 times	More than 7 ounces or more than 1 fillet or more than 14 pieces of sushi	No	No	0 minutes (no exercise) / day		Week 6	03	Entered	40	Male	19NOV15	120	Placebo	<250 mg/day	No	No	<250 mg/day	No	Yes	Yes	Yes	No
				salmon shrimp	0	0	03_007	Visit 3	Yes	6	41	04JAN16	More than 2 times	More than 7 ounces or more than 1 fillet or more than 14 pieces of sushi	No	No	0 minutes (no exercise) / day		Week 6	03	Entered	40	Male	19NOV15	120	Placebo	<250 mg/day	No	No	<250 mg/day	No	Yes	Yes	Yes	No
		walking		salmon shrimp	0	2	03_007	Visit 4	Yes	7	42	30DEC15	2 times	More than 7 ounces or more than 1 fillet or more than 14 pieces of sushi	No	No	30 or more minutes / day	Moderate	Week 12	03	Entered	40	Male	19NOV15	120	Placebo	<250 mg/day	No	No	<250 mg/day	No	Yes	Yes	Yes	No
		walking		salmon shrimp	0	2	03_007	Visit 4	Yes	7	43	31DEC15	2 times	More than 7 ounces or more than 1 fillet or more than 14 pieces of sushi	No	No	30 or more minutes / day	Moderate	Week 12	03	Entered	40	Male	19NOV15	120	Placebo	<250 mg/day	No	No	<250 mg/day	No	Yes	Yes	Yes	No
		walking		salmon shrimp	0	2	03_007	Visit 4	Yes	7	44	01JAN16	2 times	More than 7 ounces or more than 1 fillet or more than 14 pieces of sushi	No	No	30 or more minutes / day	Moderate	Week 12	03	Entered	40	Male	19NOV15	120	Placebo	<250 mg/day	No	No	<250 mg/day	No	Yes	Yes	Yes	No
		walking		salmon shrimp	0	2	03_007	Visit 4	Yes	7	45	02JAN16	2 times	More than 7 ounces or more than 1 fillet or more than 14 pieces of sushi	No	No	30 or more minutes / day	Moderate	Week 12	03	Entered	40	Male	19NOV15	120	Placebo	<250 mg/day	No	No	<250 mg/day	No	Yes	Yes	Yes	No
		walking		salmon shrimp	0	2	03_007	Visit 4	Yes	7	46	03JAN16	2 times	More than 7 ounces or more than 1 fillet or more than 14 pieces of sushi	No	No	30 or more minutes / day	Moderate	Week 12	03	Entered	40	Male	19NOV15	120	Placebo	<250 mg/day	No	No	<250 mg/day	No	Yes	Yes	Yes	No
		walking		salmon shrimp	0	2	03_007	Visit 4	Yes	7	47	04JAN16	2 times	More than 7 ounces or more than 1 fillet or more than 14 pieces of sushi	No	No	30 or more minutes / day	Moderate	Week 12	03	Entered	40	Male	19NOV15	120	Placebo	<250 mg/day	No	No	<250 mg/day	No	Yes	Yes	Yes	No
		walking	day42	salmon shrimp	0	2	03_007	Visit 4	Yes	7	48	05JAN16	2 times	More than 7 ounces or more than 1 fillet or more than 14 pieces of sushi	No	No	30 or more minutes / day	Moderate	Week 12	03	Entered	40	Male	19NOV15	120	Placebo	<250 mg/day	No	No	<250 mg/day	No	Yes	Yes	Yes	No
					1	2	03_007	Visit 4	Yes	8	49	09JAN16	0 (not at all) (if 0, skip questions 2 and 3)		No	No	0 minutes (no exercise) / day		Week 12	03	Entered	40	Male	19NOV15	120	Placebo	<250 mg/day	No	No	<250 mg/day	No	Yes	Yes	Yes	No
					1	2	03_007	Visit 4	Yes	8	50	10JAN16	0 (not at all) (if 0, skip questions 2 and 3)		No	No	0 minutes (no exercise) / day		Week 12	03	Entered	40	Male	19NOV15	120	Placebo	<250 mg/day	No	No	<250 mg/day	No	Yes	Yes	Yes	No
					1	2	03_007	Visit 4	Yes	8	51	11JAN16	0 (not at all) (if 0, skip questions 2 and 3)		No	No	0 minutes (no exercise) / day		Week 12	03	Entered	40	Male	19NOV15	120	Placebo	<250 mg/day	No	No	<250 mg/day	No	Yes	Yes	Yes	No
					1	2	03_007	Visit 4	Yes	8	52	12JAN16	0 (not at all) (if 0, skip questions 2 and 3)		No	No	0 minutes (no exercise) / day		Week 12	03	Entered	40	Male	19NOV15	120	Placebo	<250 mg/day	No	No	<250 mg/day	No	Yes	Yes	Yes	No
					1	2	03_007	Visit 4	Yes	8	53	13JAN16	0 (not at all) (if 0, skip questions 2 and 3)		No	No	0 minutes (no exercise) / day		Week 12	03	Entered	40	Male	19NOV15	120	Placebo	<250 mg/day	No	No	<250 mg/day	No	Yes	Yes	Yes	No
					1	2	03_007	Visit 4	Yes	8	54	14JAN16	0 (not at all) (if 0, skip questions 2 and 3)		No	No	0 minutes (no exercise) / day		Week 12	03	Entered	40	Male	19NOV15	120	Placebo	<250 mg/day	No	No	<250 mg/day	No	Yes	Yes	Yes	No
					1	2	03_007	Visit 4	Yes	8	55	15JAN16	0 (not at all) (if 0, skip questions 2 and 3)		No	No	0 minutes (no exercise) / day		Week 12	03	Entered	40	Male	19NOV15	120	Placebo	<250 mg/day	No	No	<250 mg/day	No	Yes	Yes	Yes	No
ate oatmeal for breakfast				salmon	0	0	03_007	Visit 4	Yes	9	56	20JAN16	2 times	2 to 7 ounces or about 1 fillet or 4-14 pieces of sushi	Yes	No	0 minutes (no exercise) / day		Week 12	03	Entered	40	Male	19NOV15	120	Placebo	<250 mg/day	No	No	<250 mg/day	No	Yes	Yes	Yes	No
ate oatmeal for breakfast				salmon	0	0	03_007	Visit 4	Yes	9	57	21JAN16	2 times	2 to 7 ounces or about 1 fillet or 4-14 pieces of sushi	Yes	No	0 minutes (no exercise) / day		Week 12	03	Entered	40	Male	19NOV15	120	Placebo	<250 mg/day	No	No	<250 mg/day	No	Yes	Yes	Yes	No
ate oatmeal for breakfast				salmon	0	0	03_007	Visit 4	Yes	9	58	22JAN16	2 times	2 to 7 ounces or about 1 fillet or 4-14 pieces of sushi	Yes	No	0 minutes (no exercise) / day		Week 12	03	Entered	40	Male	19NOV15	120	Placebo	<250 mg/day	No	No	<250 mg/day	No	Yes	Yes	Yes	No
ate oatmeal for breakfast				salmon	0	0	03_007	Visit 4	Yes	9	59	23JAN16	2 times	2 to 7 ounces or about 1 fillet or 4-14 pieces of sushi	Yes	No	0 minutes (no exercise) / day		Week 12	03	Entered	40	Male	19NOV15	120	Placebo	<250 mg/day	No	No	<250 mg/day	No	Yes	Yes	Yes	No
ate oatmeal for breakfast				salmon	0	0	03_007	Visit 4	Yes	9	60	24JAN16	2 times	2 to 7 ounces or about 1 fillet or 4-14 pieces of sushi	Yes	No	0 minutes (no exercise) / day		Week 12	03	Entered	40	Male	19NOV15	120	Placebo	<250 mg/day	No	No	<250 mg/day	No	Yes	Yes	Yes	No
ate oatmeal for breakfast				salmon	0	0	03_007	Visit 4	Yes	9	61	25JAN16	2 times	2 to 7 ounces or about 1 fillet or 4-14 pieces of sushi	Yes	No	0 minutes (no exercise) / day		Week 12	03	Entered	40	Male	19NOV15	120	Placebo	<250 mg/day	No	No	<250 mg/day	No	Yes	Yes	Yes	No
ate oatmeal for breakfast				salmon	0	0	03_007	Visit 4	Yes	9	62	26JAN16	2 times	2 to 7 ounces or about 1 fillet or 4-14 pieces of sushi	Yes	No	0 minutes (no exercise) / day		Week 12	03	Entered	40	Male	19NOV15	120	Placebo	<250 mg/day	No	No	<250 mg/day	No	Yes	Yes	Yes	No
					0	0	03_007	Visit 4	Yes	10	63	27JAN16	0 (not at all) (if 0, skip questions 2 and 3)		No	No	0 minutes (no exercise) / day		Week 12	03	Entered	40	Male	19NOV15	120	Placebo	<250 mg/day	No	No	<250 mg/day	No	Yes	Yes	Yes	No
					0	0	03_007	Visit 4	Yes	10	64	28JAN16	0 (not at all) (if 0, skip questions 2 and 3)		No	No	0 minutes (no exercise) / day		Week 12	03	Entered	40	Male	19NOV15	120	Placebo	<250 mg/day	No	No	<250 mg/day	No	Yes	Yes	Yes	No
					0	0	03_007	Visit 4	Yes	10	65	29JAN16	0 (not at all) (if 0, skip questions 2 and 3)		No	No	0 minutes (no exercise) / day		Week 12	03	Entered	40	Male	19NOV15	120	Placebo	<250 mg/day	No	No	<250 mg/day	No	Yes	Yes	Yes	No
					0	0	03_007	Visit 4	Yes	10	66	30JAN16	0 (not at all) (if 0, skip questions 2 and 3)		No	No	0 minutes (no exercise) / day		Week 12	03	Entered	40	Male	19NOV15	120	Placebo	<250 mg/day	No	No	<250 mg/day	No	Yes	Yes	Yes	No
					0	0	03_007	Visit 4	Yes	10	67	31JAN16	0 (not at all) (if 0, skip questions 2 and 3)		No	No	0 minutes (no exercise) / day		Week 12	03	Entered	40	Male	19NOV15	120	Placebo	<250 mg/day	No	No	<250 mg/day	No	Yes	Yes	Yes	No
					0	0	03_007	Visit 4	Yes	10	68	01FEB16	0 (not at all) (if 0, skip questions 2 and 3)		No	No	0 minutes (no exercise) / day		Week 12	03	Entered	40	Male	19NOV15	120	Placebo	<250 mg/day	No	No	<250 mg/day	No	Yes	Yes	Yes	No
					0	0	03_007	Visit 4	Yes	10	69	02FEB16	0 (not at all) (if 0, skip questions 2 and 3)		No	No	0 minutes (no exercise) / day		Week 12	03	Entered	40	Male	19NOV15	120	Placebo	<250 mg/day	No	No	<250 mg/day	No	Yes	Yes	Yes	No
		weights			0	0	03_007	Visit 4	Yes	11	70	03FEB16	0 (not at all) (if 0, skip questions 2 and 3)		No	No	30 or more minutes / day	Moderate	Week 12	03	Entered	40	Male	19NOV15	120	Placebo	<250 mg/day	No	No	<250 mg/day	No	Yes	Yes	Yes	No
		weights			0	0	03_007	Visit 4	Yes	11	71	04FEB16	0 (not at all) (if 0, skip questions 2 and 3)		No	No	30 or more minutes / day	Moderate	Week 12	03	Entered	40	Male	19NOV15	120	Placebo	<250 mg/day	No	No	<250 mg/day	No	Yes	Yes	Yes	No
		weights			0	0	03_007	Visit 4	Yes	11	72	05FEB16	0 (not at all) (if 0, skip questions 2 and 3)		No	No	30 or more minutes / day	Moderate	Week 12	03	Entered	40	Male	19NOV15	120	Placebo	<250 mg/day	No	No	<250 mg/day	No	Yes	Yes	Yes	No
		weights			0	0	03_007	Visit 4	Yes	11	73	06FEB16	0 (not at all) (if 0, skip questions 2 and 3)		No	No	30 or more minutes / day	Moderate	Week 12	03	Entered	40	Male	19NOV15	120	Placebo	<250 mg/day	No	No	<250 mg/day	No	Yes	Yes	Yes	No
		weights			0	0	03_007	Visit 4	Yes	11	74	07FEB16	0 (not at all) (if 0, skip questions 2 and 3)		No	No	30 or more minutes / day	Moderate	Week 12	03	Entered	40	Male	19NOV15	120	Placebo	<250 mg/day	No	No	<250 mg/day	No	Yes	Yes	Yes	No
		weights			0	0	03_007	Visit 4	Yes	11	75	08FEB16	0 (not at all) (if 0, skip questions 2 and 3)		No	No	30 or more minutes / day	Moderate	Week 12	03	Entered	40	Male	19NOV15	120	Placebo	<250 mg/day	No	No	<250 mg/day	No	Yes	Yes	Yes	No
		weights			0	0	03_007	Visit 4	Yes	11	76	09FEB16	0 (not at all) (if 0, skip questions 2 and 3)		No	No	30 or more minutes / day	Moderate	Week 12	03	Entered	40	Male	19NOV15	120	Placebo	<250 mg/day	No	No	<250 mg/day	No	Yes	Yes	Yes	No
eating oatmeal for breakfast					0	4	03_007	Visit 4	Yes	12	77	10FEB16	0 (not at all) (if 0, skip questions 2 and 3)		Yes	No	0 minutes (no exercise) / day		Week 12	03	Entered	40	Male	19NOV15	120	Placebo	<250 mg/day	No	No	<250 mg/day	No	Yes	Yes	Yes	No
eating oatmeal for breakfast					0	4	03_007	Visit 4	Yes	12	78	11FEB16	0 (not at all) (if 0, skip questions 2 and 3)		Yes	No	0 minutes (no exercise) / day		Week 12	03	Entered	40	Male	19NOV15	120	Placebo	<250 mg/day	No	No	<250 mg/day	No	Yes	Yes	Yes	No
eating oatmeal for breakfast					0	4	03_007	Visit 4	Yes	12	79	12FEB16	0 (not at all) (if 0, skip questions 2 and 3)		Yes	No	0 minutes (no exercise) / day		Week 12	03	Entered	40	Male	19NOV15	120	Placebo	<250 mg/day	No	No	<250 mg/day	No	Yes	Yes	Yes	No
eating oatmeal for breakfast					0	4	03_007	Visit 4	Yes	12	80	13FEB16	0 (not at all) (if 0, skip questions 2 and 3)		Yes	No	0 minutes (no exercise) / day		Week 12	03	Entered	40	Male	19NOV15	120	Placebo	<250 mg/day	No	No	<250 mg/day	No	Yes	Yes	Yes	No
eating oatmeal for breakfast					0	4	03_007	Visit 4	Yes	12	81	14FEB16	0 (not at all) (if 0, skip questions 2 and 3)		Yes	No	0 minutes (no exercise) / day		Week 12	03	Entered	40	Male	19NOV15	120	Placebo	<250 mg/day	No	No	<250 mg/day	No	Yes	Yes	Yes	No
eating oatmeal for breakfast					0	4	03_007	Visit 4	Yes	12	82	15FEB16	0 (not at all) (if 0, skip questions 2 and 3)		Yes	No	0 minutes (no exercise) / day		Week 12	03	Entered	40	Male	19NOV15	120	Placebo	<250 mg/day	No	No	<250 mg/day	No	Yes	Yes	Yes	No
eating oatmeal for breakfast					0	4	03_007	Visit 4	Yes	12	83	16FEB16	0 (not at all) (if 0, skip questions 2 and 3)		Yes	No	0 minutes (no exercise) / day		Week 12	03	Entered	40	Male	19NOV15	120	Placebo	<250 mg/day	No	No	<250 mg/day	No	Yes	Yes	Yes	No
No more eggs				Salmon tilipia	2	2	03_007	Visit 5	Yes	13	84	30MAR16	2 times	More than 7 ounces or more than 1 fillet or more than 14 pieces of sushi	Yes	No	0 minutes (no exercise) / day		Week 24	03	Entered	40	Male	19NOV15	120	Placebo	<250 mg/day	No	No	<250 mg/day	No	Yes	Yes	Yes	No
No more eggs				Salmon tilipia	2	2	03_007	Visit 5	Yes	13	85	31MAR16	2 times	More than 7 ounces or more than 1 fillet or more than 14 pieces of sushi	Yes	No	0 minutes (no exercise) / day		Week 24	03	Entered	40	Male	19NOV15	120	Placebo	<250 mg/day	No	No	<250 mg/day	No	Yes	Yes	Yes	No
No more eggs				Salmon tilipia	2	2	03_007	Visit 5	Yes	13	86	01APR16	2 times	More than 7 ounces or more than 1 fillet or more than 14 pieces of sushi	Yes	No	0 minutes (no exercise) / day		Week 24	03	Entered	40	Male	19NOV15	120	Placebo	<250 mg/day	No	No	<250 mg/day	No	Yes	Yes	Yes	No
No more eggs				Salmon tilipia	2	2	03_007	Visit 5	Yes	13	87	02APR16	2 times	More than 7 ounces or more than 1 fillet or more than 14 pieces of sushi	Yes	No	0 minutes (no exercise) / day		Week 24	03	Entered	40	Male	19NOV15	120	Placebo	<250 mg/day	No	No	<250 mg/day	No	Yes	Yes	Yes	No
No more eggs				Salmon tilipia	2	2	03_007	Visit 5	Yes	13	88	03APR16	2 times	More than 7 ounces or more than 1 fillet or more than 14 pieces of sushi	Yes	No	0 minutes (no exercise) / day		Week 24	03	Entered	40	Male	19NOV15	120	Placebo	<250 mg/day	No	No	<250 mg/day	No	Yes	Yes	Yes	No
No more eggs				Salmon tilipia	2	2	03_007	Visit 5	Yes	13	89	04APR16	2 times	More than 7 ounces or more than 1 fillet or more than 14 pieces of sushi	Yes	No	0 minutes (no exercise) / day		Week 24	03	Entered	40	Male	19NOV15	120	Placebo	<250 mg/day	No	No	<250 mg/day	No	Yes	Yes	Yes	No
No more eggs				Salmon tilipia	2	2	03_007	Visit 5	Yes	13	90	05APR16	2 times	More than 7 ounces or more than 1 fillet or more than 14 pieces of sushi	Yes	No	0 minutes (no exercise) / day		Week 24	03	Entered	40	Male	19NOV15	120	Placebo	<250 mg/day	No	No	<250 mg/day	No	Yes	Yes	Yes	No
					0	0	03_007	Visit 5	Yes	14	91	05MAR16	0 (not at all) (if 0, skip questions 2 and 3)		No	No	0 minutes (no exercise) / day		Week 24	03	Entered	40	Male	19NOV15	120	Placebo	<250 mg/day	No	No	<250 mg/day	No	Yes	Yes	Yes	No
					0	0	03_007	Visit 5	Yes	14	92	06MAR16	0 (not at all) (if 0, skip questions 2 and 3)		No	No	0 minutes (no exercise) / day		Week 24	03	Entered	40	Male	19NOV15	120	Placebo	<250 mg/day	No	No	<250 mg/day	No	Yes	Yes	Yes	No
					0	0	03_007	Visit 5	Yes	14	93	07MAR16	0 (not at all) (if 0, skip questions 2 and 3)		No	No	0 minutes (no exercise) / day		Week 24	03	Entered	40	Male	19NOV15	120	Placebo	<250 mg/day	No	No	<250 mg/day	No	Yes	Yes	Yes	No
					0	0	03_007	Visit 5	Yes	14	94	08MAR16	0 (not at all) (if 0, skip questions 2 and 3)		No	No	0 minutes (no exercise) / day		Week 24	03	Entered	40	Male	19NOV15	120	Placebo	<250 mg/day	No	No	<250 mg/day	No	Yes	Yes	Yes	No
					0	0	03_007	Visit 5	Yes	14	95	09MAR16	0 (not at all) (if 0, skip questions 2 and 3)		No	No	0 minutes (no exercise) / day		Week 24	03	Entered	40	Male	19NOV15	120	Placebo	<250 mg/day	No	No	<250 mg/day	No	Yes	Yes	Yes	No
					0	0	03_007	Visit 5	Yes	14	96	10MAR16	0 (not at all) (if 0, skip questions 2 and 3)		No	No	0 minutes (no exercise) / day		Week 24	03	Entered	40	Male	19NOV15	120	Placebo	<250 mg/day	No	No	<250 mg/day	No	Yes	Yes	Yes	No
					0	0	03_007	Visit 5	Yes	14	97	11MAR16	0 (not at all) (if 0, skip questions 2 and 3)		No	No	0 minutes (no exercise) / day		Week 24	03	Entered	40	Male	19NOV15	120	Placebo	<250 mg/day	No	No	<250 mg/day	No	Yes	Yes	Yes	No
					0	0	03_007	Visit 5	Yes	15	98	12MAR16	0 (not at all) (if 0, skip questions 2 and 3)		No	No	0 minutes (no exercise) / day		Week 24	03	Entered	40	Male	19NOV15	120	Placebo	<250 mg/day	No	No	<250 mg/day	No	Yes	Yes	Yes	No
					0	0	03_007	Visit 5	Yes	15	99	13MAR16	0 (not at all) (if 0, skip questions 2 and 3)		No	No	0 minutes (no exercise) / day		Week 24	03	Entered	40	Male	19NOV15	120	Placebo	<250 mg/day	No	No	<250 mg/day	No	Yes	Yes	Yes	No
					0	0	03_007	Visit 5	Yes	15	100	14MAR16	0 (not at all) (if 0, skip questions 2 and 3)		No	No	0 minutes (no exercise) / day		Week 24	03	Entered	40	Male	19NOV15	120	Placebo	<250 mg/day	No	No	<250 mg/day	No	Yes	Yes	Yes	No
					0	0	03_007	Visit 5	Yes	15	101	15MAR16	0 (not at all) (if 0, skip questions 2 and 3)		No	No	0 minutes (no exercise) / day		Week 24	03	Entered	40	Male	19NOV15	120	Placebo	<250 mg/day	No	No	<250 mg/day	No	Yes	Yes	Yes	No
					0	0	03_007	Visit 5	Yes	15	102	16MAR16	0 (not at all) (if 0, skip questions 2 and 3)		No	No	0 minutes (no exercise) / day		Week 24	03	Entered	40	Male	19NOV15	120	Placebo	<250 mg/day	No	No	<250 mg/day	No	Yes	Yes	Yes	No
					0	0	03_007	Visit 5	Yes	15	103	17MAR16	0 (not at all) (if 0, skip questions 2 and 3)		No	No	0 minutes (no exercise) / day		Week 24	03	Entered	40	Male	19NOV15	120	Placebo	<250 mg/day	No	No	<250 mg/day	No	Yes	Yes	Yes	No
					0	0	03_007	Visit 5	Yes	15	104	18MAR16	0 (not at all) (if 0, skip questions 2 and 3)		No	No	0 minutes (no exercise) / day		Week 24	03	Entered	40	Male	19NOV15	120	Placebo	<250 mg/day	No	No	<250 mg/day	No	Yes	Yes	Yes	No
		walk			0	0	03_007	Visit 5	Yes	16	105	19MAR16	0 (not at all) (if 0, skip questions 2 and 3)		No	No	< 30 minutes / day	Light	Week 24	03	Entered	40	Male	19NOV15	120	Placebo	<250 mg/day	No	No	<250 mg/day	No	Yes	Yes	Yes	No
		walk			0	0	03_007	Visit 5	Yes	16	106	20MAR16	0 (not at all) (if 0, skip questions 2 and 3)		No	No	< 30 minutes / day	Light	Week 24	03	Entered	40	Male	19NOV15	120	Placebo	<250 mg/day	No	No	<250 mg/day	No	Yes	Yes	Yes	No
		walk			0	0	03_007	Visit 5	Yes	16	107	21MAR16	0 (not at all) (if 0, skip questions 2 and 3)		No	No	< 30 minutes / day	Light	Week 24	03	Entered	40	Male	19NOV15	120	Placebo	<250 mg/day	No	No	<250 mg/day	No	Yes	Yes	Yes	No
		walk			0	0	03_007	Visit 5	Yes	16	108	22MAR16	0 (not at all) (if 0, skip questions 2 and 3)		No	No	< 30 minutes / day	Light	Week 24	03	Entered	40	Male	19NOV15	120	Placebo	<250 mg/day	No	No	<250 mg/day	No	Yes	Yes	Yes	No
		walk			0	0	03_007	Visit 5	Yes	16	109	23MAR16	0 (not at all) (if 0, skip questions 2 and 3)		No	No	< 30 minutes / day	Light	Week 24	03	Entered	40	Male	19NOV15	120	Placebo	<250 mg/day	No	No	<250 mg/day	No	Yes	Yes	Yes	No
		walk			0	0	03_007	Visit 5	Yes	16	110	24MAR16	0 (not at all) (if 0, skip questions 2 and 3)		No	No	< 30 minutes / day	Light	Week 24	03	Entered	40	Male	19NOV15	120	Placebo	<250 mg/day	No	No	<250 mg/day	No	Yes	Yes	Yes	No
		walk			0	0	03_007	Visit 5	Yes	16	111	25MAR16	0 (not at all) (if 0, skip questions 2 and 3)		No	No	< 30 minutes / day	Light	Week 24	03	Entered	40	Male	19NOV15	120	Placebo	<250 mg/day	No	No	<250 mg/day	No	Yes	Yes	Yes	No
		walk			0	0	03_007	Visit 5	Yes	17	112	26MAR16	0 (not at all) (if 0, skip questions 2 and 3)		No	No	< 30 minutes / day	Light	Week 24	03	Entered	40	Male	19NOV15	120	Placebo	<250 mg/day	No	No	<250 mg/day	No	Yes	Yes	Yes	No
[truncated: 25,226 more rows]
