# Supplementary material for: Evaluation of a High Concentrate Omega-3 for Correcting the Omega-3 Fatty Acid Nutritional Deficiency in Non-alcoholic Fatty Liver Disease and effects on Hepatic Steatosis (CONDIN)
Source: Preprints.org preprint supplement (doi:10.20944/preprints201807.0240.v1), 2018-07-13
Supplement: Supplementary file 7 [file FFQ.xlsx]

## Sheet: FFQ
FORM	MEAL	FSH1EPA	FSH1DHA	FSH1ALA	FSH2EPA	FSH2DHA	FSH2ALA	FSH3EPA	FSH3DHA	FSH3ALA	FSH4EPA	FSH4DHA	FSH4ALA	FSH5EPA	FSH5DHA	FSH5ALA	FSH6EPA	FSH6DHA	FSH6ALA	FSH7EPA	FSH7DHA	FSH7ALA	FSH8EPA	FSH8DHA	FSH8ALA	FSH9EPA	FSH9DHA	FSH9ALA	FSH10EPA	FSH10DHA	FSH10ALA	FSH11EPA	FSH11DHA	FSH11ALA	FSH12EPA	FSH12DHA	FSH12ALA	FSH13EPA	FSH13DHA	FSH13ALA	FSH14EPA	FSH14DHA	FSH14ALA	FSH15EPA	FSH15DHA	FSH15ALA	FSH16EPA	FSH16DHA	FSH16ALA
Food Frequency Questionnaire	3	0	0	0	0	0	0	0	0	0	0	0	0	0	0	0	0	0	0	0	0	0	0	0	0	0	0	0	0	0	0	0	0	0	0	0	0	0	0	0	0	0	0	0	0	0	0	0	0
Food Frequency Questionnaire	5	0	0	0	0	0	0	0	0	0	0	0	0	0	0	0	0	0	0	0	0	0	0	0	0	0	0	0	0	0	0	0	0	0	0	0	0	0	0	0	0	0	0	0	0	0	0	0	0
Food Frequency Questionnaire	12	0	0	0	0	0	0	0.03435	0.0470595	0.032976	0	0	0	0	0	0	0	0	0	0.0834705	0.088623	0.005496	0	0	0	0	0	0	0	0	0	0	0	0	0	0	0	0	0	0	0	0	0	0	0	0	0.198795	0.183169	0.054684
Food Frequency Questionnaire	12	0	0	0	0	0	0	0	0	0	0	0	0	0	0	0	0	0	0	0.0811377	0.0861462	0.0053424	0	0	0	0	0	0	0	0	0	0	0	0	0	0	0	0	0	0	0	0	0	0	0	0	0	0	0
Food Frequency Questionnaire	6	0	0	0	0	0	0	0	0	0	0	0	0	0	0	0	0	0	0	0.242927	0.257923	0.0159952	0	0	0	0	0	0	0	0	0	0	0	0	0	0	0	0	0	0	0	0	0	0	0	0	0	0	0
Food Frequency Questionnaire	6	0	0	0	0	0	0	0	0	0	0	0	0	0	0	0	0	0	0	0.0811377	0.0861462	0.0053424	0	0	0	0	0	0	0	0	0	0	0	0	0	0	0	0	0	0	0	0	0	0	0	0	0	0	0
Food Frequency Questionnaire	12	0.304909	0.457863	0.141957	0.322903	0.664801	0	0.09997	0.136959	0.0959712	0.137959	0.145956	0.0079976	0.102969	0.172948	0.0029991	0.242927	0.230931	0.0209937	0.242927	0.257923	0.0159952	0.0759772	0.161951	0.0029991	0.0909727	0.373888	0.0829751	0	0	0	0	0	0	0.340898	0.138958	0.009997	0.173948	0.226932	0	0.0259922	0.112966	0.0059982	0.19994	0.29991	0	0.198795	0.183169	0.0546903
Food Frequency Questionnaire	4	0	0	0	0	0	0	0	0	0	0	0	0	0	0	0	0.239331	0.227512	0.0206829	0.239331	0.254104	0.0157584	0	0	0	0.0896259	0.368353	0.0817467	0	0	0	0	0	0	0.335851	0.136901	0.009849	0	0	0	0.0256074	0.111294	0.0059094	0	0	0	0	0	0
Food Frequency Questionnaire	12	0	0	0	0	0	0	0	0	0	0	0	0	0	0	0	0	0	0	0	0	0	0	0	0	0	0	0	0	0	0	0	0	0	0	0	0	0	0	0	0	0	0	0	0	0	0	0	0
Food Frequency Questionnaire	12	0	0	0	0	0	0	0	0	0	0.135916	0.143795	0.0078792	0.101445	0.170388	0.0029547	0	0	0	0	0	0	0	0	0	0	0	0	0	0	0	0	0	0	0	0	0	0	0	0	0	0	0	0	0	0	0	0	0
Food Frequency Questionnaire	14	0	0	0	0	0	0	0	0	0	0.135916	0.143795	0.0078792	0	0	0	0	0	0	0	0	0	0	0	0	0	0	0	0	0	0	0	0	0	0	0	0	0	0	0	0	0	0	0	0	0	0	0	0
Food Frequency Questionnaire	12	0	0	0	0	0	0	0.09997	0.136959	0.0959712	0	0	0	0.102969	0.172948	0.0029991	0	0	0	0	0	0	0	0	0	0	0	0	0	0	0	0	0	0	0	0	0	0	0	0	0	0	0	0	0	0	0.198795	0.183169	0.0546903
Food Frequency Questionnaire	8	0	0	0	0	0	0	0.03435	0.0470595	0.032976	0	0	0	0	0	0	0	0	0	0	0	0	0	0	0	0	0	0	0	0	0	0	0	0	0	0	0	0	0	0	0	0	0	0	0	0	0	0	0
Food Frequency Questionnaire	7	0	0	0	0	0	0	0	0	0	0	0	0	0	0	0	0.242927	0.230931	0.0209937	0	0	0	0	0	0	0	0	0	0	0	0	0	0	0	0	0	0	0	0	0	0	0	0	0	0	0	0.198795	0.183169	0.0546903
Food Frequency Questionnaire	2	0	0	0	0	0	0	0	0	0	0	0	0	0	0	0	0	0	0	0	0	0	0	0	0	0	0	0	0	0	0	0	0	0	0	0	0	0	0	0	0	0	0	0	0	0	0	0	0
Food Frequency Questionnaire	2	0.304909	0.457863	0.141957	0	0	0	0.09997	0.136959	0.0959712	0	0	0	0	0	0	0	0	0	0	0	0	0	0	0	0	0	0	0	0	0	0	0	0	0.340898	0.138958	0.009997	0	0	0	0	0	0	0	0	0	0	0	0
Food Frequency Questionnaire	4	0	0	0	0	0	0	0.2213	0.303181	0.212448	0	0	0	0	0	0	0	0	0	0	0	0	0	0	0	0	0	0	0	0	0	0	0	0	0	0	0	0	0	0	0	0	0	0	0	0	0	0	0
Food Frequency Questionnaire	14	0	0	0	0	0	0	0.09997	0.136959	0.0959712	0	0	0	0	0	0	0	0	0	0	0	0	0	0	0	0	0	0	0	0	0	0	0	0	0	0	0	0	0	0	0	0	0	0	0	0	0	0	0
Food Frequency Questionnaire	12	0	0	0	0	0	0	0	0	0	0.135916	0.143795	0.0078792	0.101445	0.170388	0.0029547	0.239331	0.227512	0.0206829	0	0	0	0	0	0	0.0896259	0.368353	0.0817467	0	0	0	0	0	0	0	0	0	0	0	0	0	0	0	0.19698	0.29547	0	0.19339	0.17819	0.0532035
Food Frequency Questionnaire	2	0	0	0	0.318123	0.654958	0	0	0	0	0.135916	0.143795	0.0078792	0	0	0	0.239331	0.227512	0.0206829	0	0	0	0	0	0	0	0	0	0	0	0	0	0	0	0	0	0	0	0	0	0	0	0	0	0	0	0.19339	0.17819	0.0532035
Food Frequency Questionnaire	3	0.304909	0.457863	0.141957	0	0	0	0.09997	0.136959	0.0959712	0	0	0	0	0	0	0	0	0	0	0	0	0	0	0	0	0	0	0	0	0	0	0	0	0	0	0	0	0	0	0.0259922	0.112966	0.0059982	0	0	0	0	0	0
Food Frequency Questionnaire	5	0	0	0	0	0	0	0	0	0	0	0	0	0	0	0	0.239331	0.227512	0.0206829	0	0	0	0	0	0	0	0	0	0	0	0	0	0	0	0.335851	0.136901	0.009849	0	0	0	0.0256074	0.111294	0.0059094	0	0	0	0.19339	0.17819	0.0532035
Food Frequency Questionnaire	5	0	0	0	0	0	0	0	0	0	0	0	0	0	0	0	0	0	0	0	0	0	0	0	0	0	0	0	0	0	0	0	0	0	0	0	0	0	0	0	0.0259922	0.112966	0.0059982	0	0	0	0	0	0
Food Frequency Questionnaire	6	0	0	0	0	0	0	0	0	0	0	0	0	0	0	0	0	0	0	0	0	0	0	0	0	0	0	0	0	0	0	0	0	0	0	0	0	0	0	0	0	0	0	0	0	0	0	0	0
Food Frequency Questionnaire	1.5	0	0	0	0	0	0	0	0	0	0	0	0	0	0	0	0	0	0	0	0	0	0	0	0	0	0	0	0	0	0	0	0	0	0	0	0	0	0	0	0	0	0	0	0	0	0	0	0
Food Frequency Questionnaire	3	0	0	0	0	0	0	0	0	0	0	0	0	0	0	0	0	0	0	0.239331	0.254104	0.0157584	0	0	0	0	0	0	0	0	0	0	0	0	0	0	0	0	0	0	0	0	0	0	0	0	0	0	0
Food Frequency Questionnaire	11	0	0	0	0	0	0	0	0	0	0	0	0	0	0	0	0	0	0	0	0	0	0	0	0	0	0	0	0	0	0	0	0	0	0	0	0	0	0	0	0	0	0	0	0	0	0	0	0
Food Frequency Questionnaire	14	0	0	0	0	0	0	0	0	0	0	0	0	0	0	0	0	0	0	0	0	0	0	0	0	0	0	0	0	0	0	0	0	0	0	0	0	0	0	0	0	0	0	0	0	0	0	0	0
Food Frequency Questionnaire	12	0	0	0	0	0	0	0	0	0	0	0	0	0	0	0	0	0	0	0	0	0	0	0	0	0	0	0	0	0	0	0	0	0	0	0	0	0	0	0	0	0	0	0	0	0	0	0	0
Food Frequency Questionnaire	1.5	0	0	0	0	0	0	0	0	0	0	0	0	0	0	0	0	0	0	0	0	0	0	0	0	0	0	0	0	0	0	0	0	0	0	0	0	0	0	0	0	0	0	0	0	0	0	0	0
Food Frequency Questionnaire	6	0	0	0	0	0	0	0	0	0	0	0	0	0	0	0	0	0	0	0	0	0	0	0	0	0	0	0	0	0	0	0	0	0	0	0	0	0	0	0	0	0	0	0	0	0	0	0	0
Food Frequency Questionnaire	15	0	0	0	0	0	0	0	0	0	0	0	0	0.101445	0.170388	0.0029547	0	0	0	0	0	0	0	0	0	0	0	0	0	0	0	0	0	0	0	0	0	0	0	0	0	0	0	0	0	0	0	0	0
Food Frequency Questionnaire	5	0	0	0	0	0	0	0	0	0	0	0	0	0.101445	0.170388	0.0029547	0	0	0	0	0	0	0	0	0	0	0	0	0	0	0	0	0	0	0	0	0	0	0	0	0	0	0	0	0	0	0	0	0
Food Frequency Questionnaire	12	0	0	0	0	0	0	0	0	0	0	0	0	0	0	0	0	0	0	0	0	0	0	0	0	0	0	0	0	0	0	0.385062	0.502351	0	0	0	0	0	0	0	0	0	0	0	0	0	0	0	0
Food Frequency Questionnaire	3	0	0	0	0	0	0	0	0	0	0	0	0	0	0	0	0	0	0	0	0	0	0	0	0	0	0	0	0	0	0	0	0	0	0	0	0	0	0	0	0	0	0	0	0	0	0	0	0
Food Frequency Questionnaire	15	0	0	0	0	0	0	0	0	0	0	0	0	0	0	0	0.0811377	0.0771309	0.0070119	0	0	0	0	0	0	0	0	0	0	0	0	0	0	0	0	0	0	0	0	0	0	0	0	0	0	0	0	0	0
Food Frequency Questionnaire	8.30	0	0	0	0	0	0	0	0	0	0	0	0	0	0	0	0	0	0	0	0	0	0	0	0	0	0	0	0	0	0	0	0	0	0	0	0	0	0	0	0	0	0	0	0	0	0	0	0
Food Frequency Questionnaire	15	0	0	0	0	0	0	0	0	0	0	0	0	0	0	0	0	0	0	0	0	0	0	0	0	0	0	0	0	0	0	0	0	0	0	0	0	0	0	0	0	0	0	0	0	0	0	0	0
Food Frequency Questionnaire	18	0	0	0	0	0	0	0	0	0	0	0	0	0	0	0	0	0	0	0	0	0	0	0	0	0	0	0	0	0	0	0	0	0	0	0	0	0	0	0	0	0	0	0	0	0	0	0	0
Food Frequency Questionnaire	12	0	0	0	0	0	0	0	0	0	0	0	0	0.0353805	0.0594255	0.0010305	0	0	0	0	0	0	0	0	0	0	0	0	0	0	0	0	0	0	0	0	0	0.059769	0.0779745	0	0	0	0	0	0	0	0	0	0
Food Frequency Questionnaire	16	0	0	0	0	0	0	0	0	0	0	0	0	0	0	0	0	0	0	0	0	0	0	0	0	0	0	0	0	0	0	0	0	0	0	0	0	0	0	0	0	0	0	0	0	0	0	0	0
Food Frequency Questionnaire	12	0	0	0	0	0	0	0	0	0	0	0	0	0	0	0	0	0	0	0	0	0	0	0	0	0	0	0	0	0	0	0	0	0	0.117134	0.0477465	0.003435	0	0	0	0	0	0	0	0	0	0	0	0
Food Frequency Questionnaire	13	0	0	0	0	0	0	0	0	0	0	0	0	0	0	0	0	0	0	0	0	0	0	0	0	0	0	0	0	0	0	0	0	0	0.340898	0.138958	0.009997	0	0	0	0	0	0	0	0	0	0	0	0
Food Frequency Questionnaire	12	0	0	0	0	0	0	0	0	0	0	0	0	0	0	0	0	0	0	0	0	0	0.0748524	0.159554	0.0029547	0	0	0	0	0	0	0	0	0	0.335851	0.136901	0.009849	0	0	0	0	0	0	0	0	0	0	0	0
Food Frequency Questionnaire	16	0	0	0	0	0	0	0	0	0	0	0	0	0.101445	0.170388	0.0029547	0.239331	0.227512	0.0206829	0	0	0	0	0	0	0	0	0	0	0	0	0	0	0	0	0	0	0	0	0	0	0	0	0	0	0	0	0	0
Food Frequency Questionnaire	8	0	0	0	0	0	0	0	0	0	0	0	0	0	0	0	0	0	0	0	0	0	0.168188	0.358506	0.006639	0	0	0	0	0	0	0	0	0	0	0	0	0	0	0	0	0	0	0	0	0	0	0	0
Food Frequency Questionnaire	7	0	0	0	0	0	0	0	0	0	0	0	0	0	0	0	0	0	0	0	0	0	0	0	0	0	0	0	0	0	0	0	0	0	0	0	0	0	0	0	0	0	0	0	0	0	0	0	0
Food Frequency Questionnaire	1	0	0	0	0	0	0	0	0	0	0	0	0	0.101445	0.170388	0.0029547	0.239331	0.227512	0.0206829	0.239331	0.254104	0.0157584	0	0	0	0	0	0	0	0	0	0	0	0	0.335851	0.136901	0.009849	0	0	0	0.0256074	0.111294	0.0059094	0	0	0	0	0	0
Food Frequency Questionnaire	2	0	0	0	0	0	0	0	0	0	0	0	0	0	0	0	0	0	0	0	0	0	0	0	0	0	0	0	0	0	0	0	0	0	0	0	0	0	0	0	0	0	0	0	0	0	0	0	0
Food Frequency Questionnaire	12	0	0	0	0	0	0	0	0	0	0	0	0	0	0	0	0.242927	0.230931	0.0209937	0	0	0	0	0	0	0	0	0	0	0	0	0	0	0	0	0	0	0	0	0	0	0	0	0	0	0	0	0	0
Food Frequency Questionnaire	12	0	0	0	0	0	0	0	0	0	0	0	0	0.0353805	0.0594255	0.0010305	0	0	0	0	0	0	0	0	0	0	0	0	0	0	0	0	0	0	0	0	0	0	0	0	0	0	0	0	0	0	0	0	0
Food Frequency Questionnaire	10	0	0	0	0	0	0	0	0	0	0	0	0	0	0	0	0.242927	0.230931	0.0209937	0	0	0	0	0	0	0	0	0	0	0	0	0	0	0	0	0	0	0	0	0	0	0	0	0	0	0	0	0	0
Food Frequency Questionnaire	12	0	0	0	0	0	0	0	0	0	0	0	0	0.0353805	0.0594255	0.0010305	0	0	0	0	0	0	0	0	0	0	0	0	0	0	0	0	0	0	0	0	0	0	0	0	0	0	0	0	0	0	0	0	0
Food Frequency Questionnaire	7	0	0	0	0	0	0	0	0	0	0	0	0	0.102969	0.172948	0.0029991	0	0	0	0	0	0	0.0759772	0.161951	0.0029991	0	0	0	0	0	0	0	0	0	0	0	0	0	0	0	0	0	0	0	0	0	0	0	0
Food Frequency Questionnaire	7	0	0	0	0	0	0	0	0	0	0	0	0	0	0	0	0	0	0	0	0	0	0	0	0	0	0	0	0	0	0	0	0	0	0	0	0	0	0	0	0	0	0	0	0	0	0	0	0
Food Frequency Questionnaire	12	0	0	0	0	0	0	0	0	0	0	0	0	0.102969	0.172948	0.0029991	0	0	0	0	0	0	0.0759772	0.161951	0.0029991	0	0	0	0	0	0	0	0	0	0	0	0	0	0	0	0	0	0	0	0	0	0	0	0
Food Frequency Questionnaire	10	0	0	0	0	0	0	0	0	0	0	0	0	0	0	0	0	0	0	0	0	0	0	0	0	0	0	0	0	0	0	0	0	0	0	0	0	0	0	0	0	0	0	0	0	0	0	0	0
Food Frequency Questionnaire	14	0	0	0	0	0	0	0	0	0	0	0	0	0	0	0	0	0	0	0	0	0	0	0	0	0	0	0	0	0	0	0	0	0	0	0	0	0	0	0	0	0	0	0	0	0	0	0	0
Food Frequency Questionnaire	8	0	0	0	0	0	0	0	0	0	0	0	0	0	0	0	0	0	0	0	0	0	0	0	0	0	0	0	0	0	0	0	0	0	0	0	0	0	0	0	0	0	0	0	0	0	0	0	0
Food Frequency Questionnaire	12	0	0	0	0	0	0	0	0	0	0	0	0	0	0	0	0	0	0	0	0	0	0	0	0	0	0	0	0	0	0	0	0	0	0	0	0	0	0	0	0	0	0	0	0	0	0	0	0
Food Frequency Questionnaire	18	0	0	0	0	0	0	0	0	0	0	0	0	0	0	0	0.239331	0.227512	0.0206829	0	0	0	0.0748524	0.159554	0.0029547	0	0	0	0	0	0	0	0	0	0.335851	0.136901	0.009849	0	0	0	0.0256074	0.111294	0.0059094	0	0	0	0	0	0
Food Frequency Questionnaire	20	0	0	0	0	0	0	0	0	0	0	0	0	0	0	0	0	0	0	0	0	0	0	0	0	0	0	0	0	0	0	0	0	0	0	0	0	0	0	0	0	0	0	0	0	0	0	0	0
Food Frequency Questionnaire	19	0	0	0	0	0	0	0	0	0	0	0	0	0	0	0	0	0	0	0	0	0	0	0	0	0	0	0	0	0	0	0	0	0	0	0	0	0	0	0	0	0	0	0	0	0	0	0	0
Food Frequency Questionnaire	21	0	0	0	0	0	0	0	0	0	0	0	0	0	0	0	0	0	0	0	0	0	0	0	0	0	0	0	0	0	0	0	0	0	0	0	0	0	0	0	0	0	0	0	0	0	0	0	0
Food Frequency Questionnaire	14	0	0	0	0	0	0	0	0	0	0	0	0	0	0	0	0	0	0	0	0	0	0	0	0	0	0	0	0	0	0	0	0	0	0	0	0	0	0	0	0	0	0	0	0	0	0	0	0
Food Frequency Questionnaire	13	0	0	0	0	0	0	0	0	0	0	0	0	0	0	0	0	0	0	0	0	0	0	0	0	0	0	0	0	0	0	0	0	0	0	0	0	0	0	0	0	0	0	0	0	0	0	0	0
Food Frequency Questionnaire	14	0	0	0	0	0	0	0	0	0	0	0	0	0	0	0	0	0	0	0	0	0	0	0	0	0	0	0	0	0	0	0	0	0	0	0	0	0	0	0	0	0	0	0	0	0	0	0	0
Food Frequency Questionnaire	14	0	0	0	0	0	0	0	0	0	0	0	0	0	0	0	0	0	0	0	0	0	0	0	0	0	0	0	0	0	0	0	0	0	0	0	0	0	0	0	0	0	0	0	0	0	0	0	0
Food Frequency Questionnaire	13	0	0	0	0	0	0	0	0	0	0	0	0	0	0	0	0	0	0	0	0	0	0	0	0	0	0	0	0	0	0	0	0	0	0	0	0	0	0	0	0	0	0	0	0	0	0	0	0
Food Frequency Questionnaire	13	0	0	0	0	0	0	0	0	0	0	0	0	0	0	0	0	0	0	0	0	0	0	0	0	0	0	0	0	0	0	0	0	0	0	0	0	0	0	0	0	0	0	0	0	0	0	0	0
Food Frequency Questionnaire	14	0	0	0	0	0	0	0	0	0	0	0	0	0	0	0	0	0	0	0	0	0	0	0	0	0	0	0	0	0	0	0	0	0	0	0	0	0	0	0	0	0	0	0	0	0	0	0	0
Food Frequency Questionnaire	12	0	0	0	0	0	0	0	0	0	0	0	0	0	0	0	0	0	0	0	0	0	0	0	0	0	0	0	0	0	0	0	0	0	0	0	0	0	0	0	0	0	0	0	0	0	0	0	0
Food Frequency Questionnaire	15	0	0	0	0	0	0	0	0	0	0	0	0	0	0	0	0	0	0	0	0	0	0	0	0	0	0	0	0	0	0	0	0	0	0	0	0	0	0	0	0	0	0	0	0	0	0	0	0
Food Frequency Questionnaire	14	0	0	0	0	0	0	0	0	0	0	0	0	0	0	0	0	0	0	0	0	0	0	0	0	0	0	0	0	0	0	0	0	0	0	0	0	0	0	0	0	0	0	0	0	0	0	0	0
Food Frequency Questionnaire	12	0	0	0	0	0	0	0	0	0	0	0	0	0	0	0	0	0	0	0	0	0	0	0	0	0	0	0	0	0	0	0	0	0	0	0	0	0	0	0	0	0	0	0	0	0	0	0	0
Food Frequency Questionnaire	12	0	0	0	0	0	0	0	0	0	0	0	0	0	0	0	0	0	0	0	0	0	0	0	0	0	0	0	0	0	0	0	0	0	0	0	0	0	0	0	0	0	0	0	0	0	0	0	0
Food Frequency Questionnaire	12	0	0	0	0	0	0	0	0	0	0	0	0	0	0	0	0	0	0	0	0	0	0	0	0	0	0	0	0	0	0	0	0	0	0	0	0	0	0	0	0	0	0	0	0	0	0	0	0
Food Frequency Questionnaire	3	0	0	0	0	0	0	0.09997	0.136959	0.0959712	0	0	0	0	0	0	0	0	0	0	0	0	0	0	0	0	0	0	0	0	0	0	0	0	0	0	0	0	0	0	0.0259922	0.112966	0.0059982	0	0	0	0	0	0
Food Frequency Questionnaire	2	0	0	0	0	0	0	0	0	0	0	0	0	0	0	0	0	0	0	0	0	0	0	0	0	0	0	0	0	0	0	0	0	0	0	0	0	0	0	0	0	0	0	0	0	0	0	0	0
Food Frequency Questionnaire	4	0	0	0	0	0	0	0	0	0	0	0	0	0	0	0	0	0	0	0	0	0	0	0	0	0	0	0	0	0	0	0	0	0	0	0	0	0	0	0	0	0	0	0	0	0	0	0	0
Food Frequency Questionnaire	15	0	0	0	0	0	0	0	0	0	0	0	0	0	0	0	0	0	0	0	0	0	0	0	0	0	0	0	0	0	0	0	0	0	0	0	0	0	0	0	0	0	0	0	0	0	0	0	0
Food Frequency Questionnaire	2	0	0	0	0	0	0	0.09997	0.136959	0.0959712	0	0	0	0	0	0	0	0	0	0	0	0	0	0	0	0	0	0	0	0	0	0	0	0	0	0	0	0	0	0	0	0	0	0	0	0	0	0	0
Food Frequency Questionnaire	6	0	0	0	0	0	0	0	0	0	0	0	0	0	0	0	0	0	0	0	0	0	0	0	0	0	0	0	0	0	0	0	0	0	0	0	0	0	0	0	0	0	0	0	0	0	0	0	0
Food Frequency Questionnaire	5	0	0	0	0	0	0	0	0	0	0	0	0	0	0	0	0	0	0	0	0	0	0	0	0	0.20515	0.843146	0.187115	0	0	0	0	0	0	0	0	0	0	0	0	0	0	0	0	0	0	0	0	0
Food Frequency Questionnaire	12	0	0	0	0	0	0	0	0	0	0	0	0	0	0	0	0.537759	0.511203	0.046473	0	0	0	0	0	0	0	0	0	0	0	0	0	0	0	0.754633	0.307607	0.02213	0	0	0	0	0	0	0	0	0	0	0	0
Food Frequency Questionnaire	5	0	0	0	0	0	0	0.09997	0.136959	0.0959712	0	0	0	0	0	0	0	0	0	0	0	0	0	0	0	0	0	0	0	0	0	0	0	0	0	0	0	0	0	0	0	0	0	0	0	0	0.198795	0.183169	0.0546903
Food Frequency Questionnaire	15	0.674965	1.01355	0.314246	0	0	0	0	0	0	0	0	0	0	0	0	0	0	0	0	0	0	0	0	0	0	0	0	0	0	0	0	0	0	0	0	0	0	0	0	0.057538	0.250069	0.013278	0	0	0	0	0	0
Food Frequency Questionnaire	12	0	0	0	0	0	0	0	0	0	0	0	0	0	0	0	0	0	0	0	0	0	0	0	0	0	0	0	0	0	0	0	0	0	0.335851	0.136901	0.009849	0	0	0	0	0	0	0	0	0	0	0	0
Food Frequency Questionnaire	12	0	0	0	0	0	0	0	0	0	0	0	0	0	0	0	0	0	0	0	0	0	0	0	0	0	0	0	0	0	0	0	0	0	0	0	0	0	0	0	0	0	0	0	0	0	0	0	0
Food Frequency Questionnaire	3.5	0	0	0	0	0	0	0	0	0	0	0	0	0	0	0	0	0	0	0	0	0	0	0	0	0	0	0	0	0	0	0	0	0	0	0	0	0	0	0	0	0	0	0	0	0	0	0	0
Food Frequency Questionnaire	1	0	0	0	0	0	0	0	0	0	0	0	0	0	0	0	0	0	0	0	0	0	0	0	0	0	0	0	0	0	0	0	0	0	0	0	0	0	0	0	0	0	0	0	0	0	0	0	0
Food Frequency Questionnaire	2	0	0	0	0	0	0	0	0	0	0	0	0	0	0	0	0	0	0	0	0	0	0	0	0	0	0	0	0	0	0	0	0	0	0	0	0	0	0	0	0	0	0	0	0	0	0	0	0
Food Frequency Questionnaire	3 1/2	0	0	0	0	0	0	0	0	0	0	0	0	0	0	0	0	0	0	0	0	0	0	0	0	0	0	0	0	0	0	0	0	0	0	0	0	0	0	0	0	0	0	0	0	0	0	0	0
Food Frequency Questionnaire	14	0	0	0	0	0	0	0	0	0	0	0	0	0	0	0	0	0	0	0	0	0	0	0	0	0	0	0	0	0	0	0	0	0	0	0	0	0	0	0	0	0	0	0	0	0	0	0	0
Food Frequency Questionnaire	1.5	0	0	0	0	0	0	0	0	0	0	0	0	0	0	0	0	0	0	0	0	0	0	0	0	0	0	0	0	0	0	0	0	0	0	0	0	0	0	0	0.0256074	0.111294	0.0059094	0	0	0	0	0	0
Food Frequency Questionnaire	15	0	0	0	0	0	0	0	0	0	0.0460782	0.0487494	0.0026712	0	0	0	0.0811377	0.0771309	0.0070119	0	0	0	0	0	0	0	0	0	0	0	0	0	0	0	0	0	0	0	0	0	0.0086814	0.0377307	0.0020034	0	0	0	0.19339	0.17819	0.0532035
Food Frequency Questionnaire	1	0	0	0	0	0	0	0	0	0	0	0	0	0	0	0	0.0811377	0.0771309	0.0070119	0	0	0	0	0	0	0	0	0	0	0	0	0	0	0	0.11386	0.0464121	0.003339	0	0	0	0	0	0	0	0	0	0	0	0
Food Frequency Questionnaire	14	0	0	0	0	0	0	0	0	0	0	0	0	0.102969	0.172948	0.0029991	0	0	0	0	0	0	0	0	0	0	0	0	0	0	0	0	0	0	0	0	0	0	0	0	0.0259922	0.112966	0.0059982	0	0	0	0	0	0
Food Frequency Questionnaire	1	0	0	0	0	0	0	0	0	0	0	0	0	0	0	0	0	0	0	0	0	0	0	0	0	0	0	0	0	0	0	0	0	0	0	0	0	0	0	0	0	0	0	0	0	0	0	0	0
Food Frequency Questionnaire	2.5	0	0	0	0	0	0	0	0	0	0	0	0	0	0	0	0	0	0	0	0	0	0	0	0	0	0	0	0	0	0	0	0	0	0	0	0	0	0	0	0	0	0	0	0	0	0	0	0
Food Frequency Questionnaire	15	0	0	0	0	0	0	0	0	0	0	0	0	0	0	0	0.239331	0.227512	0.0206829	0	0	0	0	0	0	0	0	0	0	0	0	0	0	0	0.335851	0.136901	0.009849	0	0	0	0.0256074	0.111294	0.0059094	0	0	0	0	0	0
Food Frequency Questionnaire	20	0	0	0	0	0	0	0	0	0	0	0	0	0	0	0	0	0	0	0	0	0	0	0	0	0	0	0	0	0	0	0	0	0	0	0	0	0	0	0	0	0	0	0	0	0	0	0	0
Food Frequency Questionnaire	19	0	0	0	0	0	0	0	0	0	0	0	0	0	0	0	0	0	0	0	0	0	0	0	0	0	0	0	0	0	0	0	0	0	0	0	0	0	0	0	0	0	0	0	0	0	0	0	0
Food Frequency Questionnaire	18.5	0	0	0	0	0	0	0	0	0	0	0	0	0.227939	0.382849	0.006639	0	0	0	0	0	0	0	0	0	0	0	0	0	0	0	0	0	0	0.754633	0.307607	0.02213	0	0	0	0	0	0	0	0	0	0	0	0
Food Frequency Questionnaire	19	0	0	0	0	0	0	0	0	0	0	0	0	0	0	0	0	0	0	0	0	0	0	0	0	0	0	0	0	0	0	0	0	0	0	0	0	0	0	0	0	0	0	0	0	0	0	0	0
Food Frequency Questionnaire	14	0	0	0	0	0	0	0	0	0	0	0	0	0.101445	0.170388	0.0029547	0	0	0	0	0	0	0	0	0	0	0	0	0	0	0	0	0	0	0	0	0	0	0	0	0.0256074	0.111294	0.0059094	0	0	0	0	0	0
Food Frequency Questionnaire	16	0	0	0	0	0	0	0	0	0	0	0	0	0	0	0	0	0	0	0	0	0	0	0	0	0	0	0	0	0	0	0	0	0	0.335851	0.136901	0.009849	0	0	0	0	0	0	0	0	0	0	0	0
Food Frequency Questionnaire	12	0	0	0	0.318123	0.654958	0	0	0	0	0	0	0	0	0	0	0	0	0	0	0	0	0	0	0	0	0	0	0	0	0	0	0	0	0.335851	0.136901	0.009849	0	0	0	0.0256074	0.111294	0.0059094	0	0	0	0	0	0
Food Frequency Questionnaire	15	0	0	0	0	0	0	0	0	0	0	0	0	0.101445	0.170388	0.0029547	0.239331	0.227512	0.0206829	0	0	0	0	0	0	0	0	0	0	0	0	0	0	0	0.335851	0.136901	0.009849	0	0	0	0	0	0	0	0	0	0	0	0
Food Frequency Questionnaire	12	0	0	0	0	0	0	0	0	0	0	0	0	0	0	0	0	0	0	0	0	0	0.0748524	0.159554	0.0029547	0	0	0	0	0	0	0	0	0	0	0	0	0	0	0	0	0	0	0	0	0	0	0	0
Food Frequency Questionnaire	14	0	0	0	0	0	0	0	0	0	0	0	0	0	0	0	0	0	0	0	0	0	0.0748524	0.159554	0.0029547	0	0	0	0	0	0	0	0	0	0	0	0	0	0	0	0	0	0	0	0	0	0	0	0
Food Frequency Questionnaire	13	0	0	0	0	0	0	0	0	0	0	0	0	0	0	0	0	0	0	0	0	0	0	0	0	0	0	0	0	0	0	0	0	0	0.335851	0.136901	0.009849	0	0	0	0	0	0	0	0	0	0	0	0
Food Frequency Questionnaire	18	0	0	0	0	0	0	0	0	0	0	0	0	0	0	0	0	0	0	0	0	0	0	0	0	0	0	0	0	0	0	0	0	0	0	0	0	0	0	0	0	0	0	0	0	0	0	0	0
Food Frequency Questionnaire	16	0	0	0	0	0	0	0	0	0	0	0	0	0	0	0	0.239331	0.227512	0.0206829	0	0	0	0	0	0	0	0	0	0	0	0	0	0	0	0.335851	0.136901	0.009849	0	0	0	0	0	0	0	0	0	0	0	0
Food Frequency Questionnaire	18	0	0	0	0	0	0	0	0	0	0.305394	0.323098	0.017704	0.227939	0.382849	0.006639	0	0	0	0	0	0	0	0	0	0	0	0	0	0	0	0	0	0	0	0	0	0	0	0	0	0	0	0	0	0	0	0	0
Food Frequency Questionnaire	19	0	0	0	0	0	0	0	0	0	0	0	0	0	0	0	0	0	0	0	0	0	0	0	0	0	0	0	0	0	0	0	0	0	0	0	0	0	0	0	0	0	0	0	0	0	0	0	0
Food Frequency Questionnaire	17	0	0	0	0	0	0	0	0	0	0	0	0	0.101445	0.170388	0.0029547	0	0	0	0	0	0	0	0	0	0	0	0	0	0	0	0	0	0	0	0	0	0	0	0	0	0	0	0	0	0	0	0	0
Food Frequency Questionnaire	13	0	0	0	0	0	0	0	0	0	0	0	0	0	0	0	0	0	0	0	0	0	0	0	0	0	0	0	0	0	0	0	0	0	0	0	0	0	0	0	0	0	0	0	0	0	0	0	0
Food Frequency Questionnaire	16	0	0	0	0	0	0	0	0	0	0	0	0	0	0	0	0	0	0	0	0	0	0	0	0	0	0	0	0	0	0	0	0	0	0	0	0	0	0	0	0	0	0	0	0	0	0	0	0
Food Frequency Questionnaire	15	0	0	0	0	0	0	0	0	0	0	0	0	0	0	0	0	0	0	0	0	0	0	0	0	0	0	0	0	0	0	0	0	0	0	0	0	0	0	0	0	0	0	0	0	0	0	0	0
Food Frequency Questionnaire	16	0	0	0	0	0	0	0	0	0	0.047403	0.050151	0.002748	0	0	0	0	0	0	0	0	0	0	0	0	0	0	0	0	0	0	0	0	0	0.117134	0.0477465	0.003435	0	0	0	0	0	0	0.0687	0.10305	0	0.198795	0.183169	0.054684
Food Frequency Questionnaire	14	0	0	0	0	0	0	0	0	0	0	0	0	0.102969	0.172948	0.0029991	0.242927	0.230931	0.0209937	0	0	0	0.0759772	0.161951	0.0029991	0	0	0	0	0	0	0	0	0	0	0	0	0	0	0	0	0	0	0	0	0	0	0	0
Food Frequency Questionnaire	19	0	0	0	0	0	0	0	0	0	0	0	0	0.102969	0.172948	0.0029991	0.242927	0.230931	0.0209937	0	0	0	0	0	0	0	0	0	0	0	0	0	0	0	0.340898	0.138958	0.009997	0	0	0	0	0	0	0	0	0	0	0	0
Food Frequency Questionnaire	14	0	0	0	0	0	0	0	0	0	0	0	0	0	0	0	0	0	0	0	0	0	0	0	0	0	0	0	0	0	0	0	0	0	0	0	0	0	0	0	0	0	0	0	0	0	0	0	0
Food Frequency Questionnaire	12	0	0	0	0	0	0	0	0	0	0	0	0	0	0	0	0	0	0	0	0	0	0	0	0	0	0	0	0	0	0	0	0	0	0	0	0	0	0	0	0	0	0	0	0	0	0	0	0
Food Frequency Questionnaire	15	0	0	0	0.322903	0.664801	0	0	0	0	0	0	0	0	0	0	0	0	0	0	0	0	0	0	0	0	0	0	0	0	0	0	0	0	0	0	0	0	0	0	0	0	0	0	0	0	0	0	0
Food Frequency Questionnaire	15	0	0	0	0.322903	0.664801	0	0	0	0	0	0	0	0	0	0	0	0	0	0	0	0	0	0	0	0	0	0	0	0	0	0	0	0	0	0	0	0	0	0	0.0259922	0.112966	0.0059982	0	0	0	0	0	0
Food Frequency Questionnaire	16	0	0	0	0	0	0	0	0	0	0	0	0	0	0	0	0	0	0	0	0	0	0	0	0	0	0	0	0	0	0	0	0	0	0	0	0	0	0	0	0	0	0	0	0	0	0	0	0
Food Frequency Questionnaire	15	0	0	0	0	0	0	0	0	0	0.135916	0.143795	0.0078792	0.101445	0.170388	0.0029547	0.239331	0.227512	0.0206829	0	0	0	0	0	0	0	0	0	0	0	0	0	0	0	0.335851	0.136901	0.009849	0	0	0	0	0	0	0.19698	0.29547	0	0.19339	0.17819	0.0532035
Food Frequency Questionnaire	16	0	0	0	0	0	0	0	0	0	0	0	0	0	0	0	0	0	0	0	0	0	0	0	0	0	0	0	0	0	0	0	0	0	0	0	0	0	0	0	0	0	0	0	0	0	0	0	0
Food Frequency Questionnaire	17	0	0	0	0	0	0	0	0	0	0	0	0	0.227939	0.382849	0.006639	0	0	0	0	0	0	0	0	0	0	0	0	0	0	0	0	0	0	0.754633	0.307607	0.02213	0	0	0	0	0	0	0	0	0	0	0	0
Food Frequency Questionnaire	16	0	0	0	0	0	0	0	0	0	0	0	0	0.0353805	0.0594255	0.0010305	0	0	0	0	0	0	0	0	0	0	0	0	0	0	0	0	0	0	0	0	0	0	0	0	0	0	0	0	0	0	0	0	0
Food Frequency Questionnaire	14	0	0	0	0	0	0	0	0	0	0.137959	0.145956	0.0079976	0	0	0	0.242927	0.230931	0.0209937	0	0	0	0	0	0	0	0	0	0	0	0	0	0	0	0.340898	0.138958	0.009997	0	0	0	0	0	0	0	0	0	0	0	0
Food Frequency Questionnaire	17	0	0	0	0	0	0	0	0	0	0	0	0	0.0343917	0.0577647	0.0010017	0	0	0	0	0	0	0.0253764	0.0540918	0.0010017	0	0	0	0	0	0	0	0	0	0.11386	0.0464121	0.003339	0	0	0	0	0	0	0	0	0	0	0	0
Food Frequency Questionnaire	15	0	0	0	0	0	0	0	0	0	0	0	0	0	0	0	0	0	0	0	0	0	0	0	0	0	0	0	0	0	0	0	0	0	0	0	0	0	0	0	0	0	0	0	0	0	0	0	0
Food Frequency Questionnaire	14	0	0	0	0	0	0	0	0	0	0	0	0	0	0	0	0	0	0	0	0	0	0	0	0	0	0	0	0	0	0	0	0	0	0	0	0	0	0	0	0	0	0	0	0	0	0	0	0
Food Frequency Questionnaire	18	0	0	0	0	0	0	0	0	0	0	0	0	0.101445	0.170388	0.0029547	0	0	0	0	0	0	0	0	0	0	0	0	0	0	0	0	0	0	0	0	0	0	0	0	0	0	0	0	0	0	0	0	0
Food Frequency Questionnaire	15	0	0	0	0	0	0	0	0	0	0	0	0	0.102969	0.172948	0.0029991	0	0	0	0	0	0	0	0	0	0	0	0	0	0	0	0	0	0	0	0	0	0	0	0	0	0	0	0	0	0	0	0	0
Food Frequency Questionnaire	12	0	0	0	0	0	0	0	0	0	0	0	0	0	0	0	0	0	0	0	0	0	0.0759772	0.161951	0.0029991	0	0	0	0	0	0	0	0	0	0.340898	0.138958	0.009997	0	0	0	0	0	0	0.19994	0.29991	0	0.198795	0.183169	0.0546903
Food Frequency Questionnaire	15	0	0	0	0	0	0	0	0	0	0	0	0	0	0	0	0	0	0	0	0	0	0	0	0	0	0	0	0	0	0	0	0	0	0	0	0	0	0	0	0	0	0	0	0	0	0	0	0
Food Frequency Questionnaire	17	0	0	0	0	0	0	0	0	0	0	0	0	0	0	0	0	0	0	0	0	0	0	0	0	0	0	0	0	0	0	0	0	0	0	0	0	0	0	0	0	0	0	0.06678	0.10017	0	0	0	0
Food Frequency Questionnaire	15	0	0	0	0	0	0	0	0	0	0	0	0	0	0	0	0	0	0	0	0	0	0	0	0	0	0	0	0	0	0	0	0	0	0	0	0	0	0	0	0	0	0	0	0	0	0	0	0
Food Frequency Questionnaire	15	0	0	0	0	0	0	0	0	0	0	0	0	0	0	0	0	0	0	0	0	0	0	0	0	0	0	0	0	0	0	0	0	0	0.335851	0.136901	0.009849	0	0	0	0	0	0	0	0	0	0	0	0
Food Frequency Questionnaire	15	0	0	0	0	0	0	0	0	0	0	0	0	0	0	0	0	0	0	0	0	0	0	0	0	0	0	0	0	0	0	0	0	0	0	0	0	0	0	0	0	0	0	0.19698	0.29547	0	0	0	0
Food Frequency Questionnaire	12	0	0	0	0	0	0	0	0	0	0	0	0	0	0	0	0	0	0	0	0	0	0	0	0	0	0	0	0	0	0	0	0	0	0	0	0	0	0	0	0	0	0	0	0	0	0	0	0
Food Frequency Questionnaire	12	0	0	0	0	0	0	0	0	0	0	0	0	0.0343917	0.0577647	0.0010017	0	0	0	0	0	0	0	0	0	0	0	0	0	0	0	0	0	0	0	0	0	0	0	0	0	0	0	0	0	0	0	0	0
Food Frequency Questionnaire	15	0	0	0	0	0	0	0	0	0	0	0	0	0	0	0	0	0	0	0	0	0	0	0	0	0	0	0	0	0	0	0	0	0	0	0	0	0	0	0	0	0	0	0	0	0	0	0	0
Food Frequency Questionnaire	13	0	0	0	0	0	0	0	0	0	0	0	0	0	0	0	0	0	0	0	0	0	0	0	0	0	0	0	0	0	0	0	0	0	0	0	0	0	0	0	0	0	0	0	0	0	0	0	0
Food Frequency Questionnaire	12	0	0	0	0	0	0	0	0	0	0	0	0	0	0	0	0	0	0	0	0	0	0	0	0	0	0	0	0	0	0	0	0	0	0	0	0	0	0	0	0	0	0	0	0	0	0	0	0
Food Frequency Questionnaire	12	0	0	0	0	0	0	0	0	0	0	0	0	0	0	0	0	0	0	0	0	0	0	0	0	0	0	0	0	0	0	0	0	0	0	0	0	0	0	0	0	0	0	0	0	0	0.198795	0.183169	0.0546903
Food Frequency Questionnaire	14	0	0	0	0	0	0	0	0	0	0	0	0	0	0	0	0	0	0	0	0	0	0	0	0	0	0	0	0	0	0	0	0	0	0	0	0	0	0	0	0	0	0	0	0	0	0	0	0
Food Frequency Questionnaire	15	0	0	0	0	0	0	0	0	0	0	0	0	0	0	0	0	0	0	0	0	0	0	0	0	0	0	0	0	0	0	0	0	0	0	0	0	0	0	0	0	0	0	0	0	0	0	0	0
Food Frequency Questionnaire	13	0	0	0	0	0	0	0	0	0	0	0	0	0	0	0	0	0	0	0	0	0	0	0	0	0	0	0	0	0	0	0	0	0	0	0	0	0	0	0	0	0	0	0	0	0	0	0	0
Food Frequency Questionnaire	13	0	0	0	0	0	0	0	0	0	0	0	0	0	0	0	0	0	0	0	0	0	0	0	0	0	0	0	0	0	0	0	0	0	0.340898	0.138958	0.009997	0	0	0	0.0259922	0.112966	0.0059982	0	0	0	0	0	0
Food Frequency Questionnaire	13	0	0	0	0	0	0	0	0	0	0	0	0	0	0	0	0	0	0	0	0	0	0	0	0	0	0	0	0	0	0	0	0	0	0	0	0	0	0	0	0	0	0	0.06678	0.10017	0	0	0	0
Food Frequency Questionnaire	12	0	0	0	0	0	0	0	0	0	0	0	0	0	0	0	0	0	0	0	0	0	0	0	0	0	0	0	0	0	0	0	0	0	0.335851	0.136901	0.009849	0	0	0	0	0	0	0	0	0	0	0	0
Food Frequency Questionnaire	14	0	0	0	0	0	0	0	0	0	0	0	0	0	0	0	0	0	0	0	0	0	0	0	0	0	0	0	0	0	0	0	0	0	0	0	0	0	0	0	0	0	0	0	0	0	0	0	0
Food Frequency Questionnaire	15	0	0	0	0	0	0	0	0	0	0	0	0	0	0	0	0	0	0	0	0	0	0	0	0	0	0	0	0	0	0	0	0	0	0	0	0	0	0	0	0	0	0	0.19994	0.29991	0	0	0	0
Food Frequency Questionnaire	13	0.304909	0.457863	0.141957	0	0	0	0	0	0	0	0	0	0	0	0	0	0	0	0	0	0	0	0	0	0	0	0	0	0	0	0	0	0	0	0	0	0	0	0	0	0	0	0	0	0	0	0	0
Food Frequency Questionnaire	12	0	0	0	0	0	0	0	0	0	0	0	0	0	0	0	0	0	0	0	0	0	0	0	0	0	0	0	0	0	0	0	0	0	0	0	0	0	0	0	0	0	0	0	0	0	0	0	0
Food Frequency Questionnaire	14	0	0	0	0	0	0	0	0	0	0	0	0	0	0	0	0	0	0	0	0	0	0	0	0	0	0	0	0	0	0	0	0	0	0	0	0	0	0	0	0	0	0	0.19698	0.29547	0	0	0	0
Food Frequency Questionnaire	14	0	0	0	0	0	0	0	0	0	0	0	0	0	0	0	0	0	0	0	0	0	0	0	0	0	0	0	0	0	0	0	0	0	0.335851	0.136901	0.009849	0	0	0	0	0	0	0	0	0	0	0	0
Food Frequency Questionnaire	12	0.304909	0.457863	0.141957	0	0	0	0	0	0	0	0	0	0	0	0	0	0	0	0	0	0	0	0	0	0	0	0	0	0	0	0	0	0	0	0	0	0	0	0	0	0	0	0	0	0	0	0	0
Food Frequency Questionnaire	18	0	0	0	0	0	0	0	0	0	0	0	0	0	0	0	0	0	0	0	0	0	0	0	0	0	0	0	0	0	0	0	0	0	0	0	0	0	0	0	0	0	0	0	0	0	0	0	0
Food Frequency Questionnaire	11	0.101839	0.152926	0.0474138	0	0	0	0	0	0	0	0	0	0	0	0	0	0	0	0.0811377	0.0861462	0.0053424	0	0	0	0	0	0	0	0	0	0	0	0	0	0	0	0	0	0	0	0	0	0	0	0	0	0	0
Food Frequency Questionnaire	16	0	0	0	0	0	0	0	0	0	0	0	0	0	0	0	0	0	0	0	0	0	0	0	0	0	0	0	0	0	0	0	0	0	0	0	0	0	0	0	0	0	0	0	0	0	0	0	0
Food Frequency Questionnaire	14	0	0	0	0	0	0	0	0	0	0	0	0	0.0353805	0.0594255	0.0010305	0	0	0	0	0	0	0	0	0	0	0	0	0	0	0	0	0	0	0	0	0	0	0	0	0	0	0	0	0	0	0	0	0
Food Frequency Questionnaire	12	0	0	0	0	0	0	0	0	0	0	0	0	0	0	0	0	0	0	0	0	0	0	0	0	0	0	0	0	0	0	0	0	0	0	0	0	0	0	0	0	0	0	0	0	0	0	0	0
Food Frequency Questionnaire	19	0	0	0	0	0	0	0	0	0	0	0	0	0	0	0	0	0	0	0	0	0	0	0	0	0	0	0	0	0	0	0	0	0	0	0	0	0	0	0	0	0	0	0	0	0	0	0	0
Food Frequency Questionnaire	12	0	0	0	0	0	0	0	0	0	0	0	0	0	0	0	0	0	0	0	0	0	0	0	0	0	0	0	0	0	0	0	0	0	0	0	0	0	0	0	0	0	0	0	0	0	0	0	0
Food Frequency Questionnaire	12	0	0	0	0	0	0	0	0	0	0	0	0	0	0	0	0	0	0	0	0	0	0	0	0	0	0	0	0	0	0	0	0	0	0	0	0	0	0	0	0	0	0	0	0	0	0	0	0
Food Frequency Questionnaire	12	0	0	0	0	0	0	0	0	0	0	0	0	0	0	0	0	0	0	0	0	0	0	0	0	0	0	0	0	0	0	0	0	0	0	0	0	0	0	0	0	0	0	0	0	0	0	0	0
Food Frequency Questionnaire	16	0	0	0	0	0	0	0	0	0	0	0	0	0.227939	0.382849	0.006639	0	0	0	0	0	0	0	0	0	0	0	0	0	0	0	0	0	0	0	0	0	0	0	0	0	0	0	0	0	0	0	0	0
Food Frequency Questionnaire	12	0	0	0	0	0	0	0	0	0	0	0	0	0	0	0	0	0	0	0	0	0	0	0	0	0	0	0	0	0	0	0	0	0	0	0	0	0	0	0	0	0	0	0	0	0	0	0	0
Food Frequency Questionnaire	10	0	0	0	0	0	0	0	0	0	0	0	0	0	0	0	0	0	0	0	0	0	0	0	0	0	0	0	0	0	0	0	0	0	0	0	0	0	0	0	0	0	0	0	0	0	0	0	0
Food Frequency Questionnaire	18	0	0	0	0	0	0	0	0	0	0	0	0	0	0	0	0	0	0	0	0	0	0	0	0	0	0	0	0	0	0	0	0	0	0	0	0	0	0	0	0	0	0	0	0	0	0	0	0
Food Frequency Questionnaire	13	0	0	0	0	0	0	0	0	0	0	0	0	0	0	0	0	0	0	0	0	0	0	0	0	0	0	0	0	0	0	0	0	0	0	0	0	0	0	0	0	0	0	0	0	0	0	0	0
Food Frequency Questionnaire	15	0	0	0	0	0	0	0	0	0	0	0	0	0	0	0	0	0	0	0	0	0	0	0	0	0	0	0	0	0	0	0	0	0	0	0	0	0	0	0	0	0	0	0	0	0	0	0	0
Food Frequency Questionnaire	12	0	0	0	0	0	0	0	0	0	0	0	0	0	0	0	0	0	0	0	0	0	0	0	0	0	0	0	0	0	0	0	0	0	0	0	0	0	0	0	0	0	0	0	0	0	0	0	0
Food Frequency Questionnaire	12	0	0	0	0	0	0	0	0	0	0	0	0	0	0	0	0	0	0	0	0	0	0	0	0	0	0	0	0	0	0	0	0	0	0	0	0	0	0	0	0	0	0	0	0	0	0	0	0
Food Frequency Questionnaire	13	0	0	0	0	0	0	0	0	0	0	0	0	0	0	0	0	0	0	0	0	0	0	0	0	0	0	0	0	0	0	0	0	0	0	0	0	0	0	0	0	0	0	0	0	0	0	0	0
Food Frequency Questionnaire	16	0	0	0	0	0	0	0	0	0	0	0	0	0	0	0	0	0	0	0	0	0	0	0	0	0	0	0	0	0	0	0	0	0	0	0	0	0	0	0	0	0	0	0	0	0	0	0	0
Food Frequency Questionnaire	15	0	0	0	0	0	0	0	0	0	0	0	0	0	0	0	0	0	0	0	0	0	0	0	0	0	0	0	0	0	0	0	0	0	0	0	0	0	0	0	0	0	0	0	0	0	0	0	0
Food Frequency Questionnaire	12	0	0	0	0	0	0	0	0	0	0	0	0	0	0	0	0	0	0	0	0	0	0	0	0	0	0	0	0	0	0	0	0	0	0	0	0	0	0	0	0	0	0	0	0	0	0	0	0
Food Frequency Questionnaire	13	0	0	0	0	0	0	0	0	0	0	0	0	0	0	0	0	0	0	0	0	0	0	0	0	0	0	0	0	0	0	0	0	0	0	0	0	0	0	0	0	0	0	0	0	0	0	0	0
Food Frequency Questionnaire	12	0	0	0	0	0	0	0	0	0	0	0	0	0	0	0	0	0	0	0	0	0	0	0	0	0	0	0	0	0	0	0	0	0	0	0	0	0	0	0	0	0	0	0	0	0	0	0	0
Food Frequency Questionnaire	16	0	0	0	0	0	0	0	0	0	0	0	0	0	0	0	0	0	0	0	0	0	0	0	0	0	0	0	0	0	0	0	0	0	0	0	0	0	0	0	0	0	0	0	0	0	0	0	0
Food Frequency Questionnaire	14	0	0	0	0	0	0	0	0	0	0	0	0	0	0	0	0	0	0	0	0	0	0	0	0	0	0	0	0	0	0	0	0	0	0	0	0	0	0	0	0	0	0	0	0	0	0	0	0
Food Frequency Questionnaire	12	0.304909	0.457863	0.141957	0	0	0	0	0	0	0	0	0	0	0	0	0	0	0	0	0	0	0	0	0	0	0	0	0	0	0	0	0	0	0	0	0	0	0	0	0	0	0	0	0	0	0	0	0
Food Frequency Questionnaire	15	0	0	0	0	0	0	0	0	0	0	0	0	0	0	0	0	0	0	0	0	0	0	0	0	0	0	0	0	0	0	0	0	0	0	0	0	0	0	0	0	0	0	0	0	0	0	0	0
Food Frequency Questionnaire	13	0	0	0	0	0	0	0	0	0	0	0	0	0	0	0	0	0	0	0	0	0	0	0	0	0	0	0	0	0	0	0	0	0	0.335851	0.136901	0.009849	0	0	0	0	0	0	0	0	0	0	0	0
Food Frequency Questionnaire	12	0.101839	0.152926	0.0474138	0	0	0	0	0	0	0	0	0	0	0	0	0	0	0	0	0	0	0.0253764	0.0540918	0.0010017	0	0	0	0	0	0	0	0	0	0	0	0	0	0	0	0	0	0	0	0	0	0	0	0
Food Frequency Questionnaire	15	0	0	0	0	0	0	0	0	0	0	0	0	0	0	0	0	0	0	0	0	0	0	0	0	0	0	0	0	0	0	0	0	0	0.340898	0.138958	0.009997	0	0	0	0	0	0	0	0	0	0	0	0
Food Frequency Questionnaire	12	0	0	0	0	0	0	0	0	0	0	0	0	0	0	0	0	0	0	0	0	0	0	0	0	0	0	0	0	0	0	0	0	0	0	0	0	0	0	0	0	0	0	0	0	0	0	0	0
Food Frequency Questionnaire	13	0	0	0	0	0	0	0	0	0	0	0	0	0	0	0	0.242927	0.230931	0.0209937	0	0	0	0	0	0	0	0	0	0	0	0	0	0	0	0	0	0	0	0	0	0.0259922	0.112966	0.0059982	0	0	0	0	0	0
Food Frequency Questionnaire	12	0	0	0	0	0	0	0	0	0	0	0	0	0	0	0	0	0	0	0	0	0	0	0	0	0	0	0	0	0	0	0	0	0	0	0	0	0	0	0	0	0	0	0	0	0	0	0	0
Food Frequency Questionnaire	15	0	0	0	0	0	0	0	0	0	0	0	0	0.101445	0.170388	0.0029547	0	0	0	0	0	0	0	0	0	0	0	0	0	0	0	0	0	0	0.335851	0.136901	0.009849	0	0	0	0	0	0	0	0	0	0	0	0
Food Frequency Questionnaire	12	0	0	0	0	0	0	0	0	0	0	0	0	0	0	0	0	0	0	0	0	0	0	0	0	0	0	0	0	0	0	0	0	0	0	0	0	0	0	0	0	0	0	0	0	0	0	0	0
Food Frequency Questionnaire	3	0	0	0	0	0	0	0	0	0	0	0	0	0	0	0	0	0	0	0	0	0	0	0	0	0	0	0	0	0	0	0	0	0	0.117134	0.0477465	0.003435	0	0	0	0	0	0	0	0	0	0	0	0
Food Frequency Questionnaire	3	0	0	0	0	0	0	0	0	0	0	0	0	0	0	0	0	0	0	0	0	0	0	0	0	0	0	0	0	0	0	0	0	0	0.11386	0.0464121	0.003339	0	0	0	0	0	0	0	0	0	0	0	0
Food Frequency Questionnaire	2	0	0	0	0	0	0	0	0	0	0	0	0	0	0	0	0	0	0	0	0	0	0	0	0	0	0	0	0	0	0	0	0	0	0	0	0	0	0	0	0	0	0	0	0	0	0	0	0
Food Frequency Questionnaire	3	0	0	0	0	0	0	0	0	0	0	0	0	0	0	0	0	0	0	0	0	0	0	0	0	0	0	0	0	0	0	0	0	0	0	0	0	0	0	0	0	0	0	0	0	0	0	0	0
Food Frequency Questionnaire	4	0	0	0	0	0	0	0	0	0	0	0	0	0	0	0	0	0	0	0	0	0	0	0	0	0	0	0	0	0	0	0	0	0	0	0	0	0	0	0	0	0	0	0	0	0	0	0	0
Food Frequency Questionnaire	3	0	0	0	0	0	0	0	0	0	0	0	0	0	0	0	0	0	0	0	0	0	0	0	0	0	0	0	0	0	0	0	0	0	0	0	0	0	0	0	0	0	0	0	0	0	0	0	0
Food Frequency Questionnaire	4	0	0	0	0	0	0	0	0	0	0	0	0	0	0	0	0	0	0	0	0	0	0	0	0	0	0	0	0	0	0	0	0	0	0	0	0	0	0	0	0	0	0	0	0	0	0	0	0
Food Frequency Questionnaire	3	0	0	0	0	0	0	0	0	0	0	0	0	0	0	0	0	0	0	0	0	0	0	0	0	0	0	0	0	0	0	0	0	0	0	0	0	0	0	0	0	0	0	0	0	0	0	0	0
Food Frequency Questionnaire	3	0	0	0	0	0	0	0	0	0	0	0	0	0	0	0	0.0834705	0.0793485	0.0072135	0	0	0	0	0	0	0	0	0	0	0	0	0	0	0	0	0	0	0	0	0	0	0	0	0	0	0	0	0	0
Food Frequency Questionnaire	3	0	0	0	0	0	0	0	0	0	0	0	0	0	0	0	0.0811377	0.0771309	0.0070119	0	0	0	0	0	0	0	0	0	0	0	0	0	0	0	0	0	0	0	0	0	0	0	0	0	0	0	0	0	0
Food Frequency Questionnaire	4	0	0	0	0	0	0	0	0	0	0	0	0	0	0	0	0	0	0	0	0	0	0	0	0	0	0	0	0	0	0	0	0	0	0	0	0	0	0	0	0	0	0	0	0	0	0	0	0
Food Frequency Questionnaire	14	0	0	0	0	0	0	0	0	0	0	0	0	0	0	0	0	0	0	0	0	0	0	0	0	0	0	0	0	0	0	0	0	0	0	0	0	0	0	0	0	0	0	0	0	0	0	0	0
Food Frequency Questionnaire	15	0	0	0	0	0	0	0	0	0	0	0	0	0	0	0	0	0	0	0	0	0	0	0	0	0	0	0	0	0	0	0	0	0	0	0	0	0	0	0	0	0	0	0	0	0	0	0	0
Food Frequency Questionnaire	14	0	0	0	0	0	0	0	0	0	0	0	0	0	0	0	0	0	0	0	0	0	0	0	0	0	0	0	0	0	0	0	0	0	0	0	0	0	0	0	0	0	0	0	0	0	0	0	0
Food Frequency Questionnaire	14	0	0	0	0	0	0	0	0	0	0	0	0	0	0	0	0	0	0	0	0	0	0	0	0	0	0	0	0	0	0	0	0	0	0	0	0	0	0	0	0	0	0	0	0	0	0	0	0
Food Frequency Questionnaire	16	0	0	0	0	0	0	0	0	0	0	0	0	0	0	0	0	0	0	0	0	0	0	0	0	0	0	0	0	0	0	0	0	0	0	0	0	0.173948	0.226932	0	0	0	0	0	0	0	0	0	0
Food Frequency Questionnaire	12	0	0	0	0	0	0	0	0	0	0	0	0	0.232203	0.390011	0.0067632	0	0	0	0	0	0	0	0	0	0	0	0	0	0	0	0	0	0	0	0	0	0	0	0	0.0586144	0.254747	0.0135264	0	0	0	0	0	0
Food Frequency Questionnaire	13	0.300395	0.451084	0.139856	0	0	0	0	0	0	0.135916	0.143795	0.0078792	0	0	0	0	0	0	0	0	0	0	0	0	0	0	0	0	0	0	0	0	0	0	0	0	0	0	0	0.0256074	0.111294	0.0059094	0	0	0	0.19339	0.17819	0.0532035
Food Frequency Questionnaire	14	0	0	0	0	0	0	0	0	0	0	0	0	0	0	0	0	0	0	0	0	0	0	0	0	0	0	0	0	0	0	0	0	0	0	0	0	0	0	0	0	0	0	0	0	0	0	0	0
Food Frequency Questionnaire	12	0	0	0	0	0	0	0	0	0	0.137959	0.145956	0.0079976	0	0	0	0.242927	0.230931	0.0209937	0	0	0	0	0	0	0	0	0	0	0	0	0	0	0	0.340898	0.138958	0.009997	0	0	0	0.0259922	0.112966	0.0059982	0	0	0	0	0	0
Food Frequency Questionnaire	13	0	0	0	0	0	0	0	0	0	0	0	0	0.102969	0.172948	0.0029991	0	0	0	0	0	0	0	0	0	0	0	0	0	0	0	0	0	0	0.340898	0.138958	0.009997	0	0	0	0.0259922	0.112966	0.0059982	0	0	0	0	0	0
Food Frequency Questionnaire	13	0.300395	0.451084	0.139856	0	0	0	0	0	0	0	0	0	0.101445	0.170388	0.0029547	0.239331	0.227512	0.0206829	0	0	0	0	0	0	0	0	0	0	0	0	0	0	0	0.335851	0.136901	0.009849	0	0	0	0.0256074	0.111294	0.0059094	0	0	0	0.19339	0.17819	0.0532035
Food Frequency Questionnaire	13	0.300395	0.451084	0.139856	0	0	0	0	0	0	0	0	0	0.101445	0.170388	0.0029547	0.239331	0.227512	0.0206829	0	0	0	0	0	0	0	0	0	0	0	0	0	0	0	0.335851	0.136901	0.009849	0	0	0	0.0256074	0.111294	0.0059094	0	0	0	0	0	0
Food Frequency Questionnaire	12	0.304909	0.457863	0.141957	0	0	0	0	0	0	0.137959	0.145956	0.0079976	0.102969	0.172948	0.0029991	0.242927	0.230931	0.0209937	0	0	0	0	0	0	0	0	0	0	0	0	0	0	0	0.340898	0.138958	0.009997	0	0	0	0.0259922	0.112966	0.0059982	0	0	0	0	0	0
Food Frequency Questionnaire	12	0	0	0	0	0	0	0	0	0	0.0460782	0.0487494	0.0026712	0	0	0	0.0811377	0.0771309	0.0070119	0	0	0	0	0	0	0	0	0	0	0	0	0	0	0	0.11386	0.0464121	0.003339	0	0	0	0.0086814	0.0377307	0.0020034	0	0	0	0.19339	0.17819	0.0532035
Food Frequency Questionnaire	12	0	0	0	0	0	0	0	0	0	0	0	0	0	0	0	0	0	0	0	0	0	0	0	0	0	0	0	0	0	0	0	0	0	0	0	0	0	0	0	0.0256074	0.111294	0.0059094	0	0	0	0	0	0
Food Frequency Questionnaire	12	0	0	0	0	0	0	0	0	0	0	0	0	0	0	0	0	0	0	0	0	0	0	0	0	0	0	0	0	0	0	0	0	0	0	0	0	0	0	0	0	0	0	0	0	0	0	0	0
[truncated: 156 more columns]
