# Supplementary material for: Evaluation of a High Concentrate Omega-3 for Correcting the Omega-3 Fatty Acid Nutritional Deficiency in Non-alcoholic Fatty Liver Disease and effects on Hepatic Steatosis (CONDIN)
Source: Preprints.org preprint supplement (doi:10.20944/preprints201807.0240.v1), 2018-07-13
Supplement: Supplementary file 8 [file ID.xlsx]

## Sheet: ID
SITE	SUBJID	STATUS	AGE	SEX	FIRSTDT	RANDNO	TREAT	OMEGA	DIABETE	STATIN	OMEGA_C	SFFL	SAFETY	ITT	MITT	PP
02	02_001	Entered	57	Female	27OCT15	108	MF4637	<250 mg/day	Yes	Yes	<250 mg/day	No	Yes	Yes	Yes	Yes
02	02_002	Entered	41	Male	06NOV15	109	MF4637	<250 mg/day	No	Yes	>=250 mg/day	No	Yes	Yes	Yes	Yes
02	02_003	Entered	58	Male	03NOV15	110	Placebo	>=250 mg/day	Yes	Yes	<250 mg/day	No	Yes	Yes	Yes	Yes
02	02_004	Early Termination	60	Female	12NOV15	111	Placebo	<250 mg/day	Yes	Yes	<250 mg/day	No	Yes	Yes	Yes	Yes
02	02_005	Entered	65	Male	04DEC15	112	Placebo	>=250 mg/day	No	No	>=250 mg/day	No	Yes	Yes	Yes	Yes
02	02_006	Screen Failure	39	Female							<250 mg/day	Yes	No	No	No	No
03	03_001	Early Termination	53	Male	19NOV15	117	MF4637	<250 mg/day	No	No	>=250 mg/day	No	Yes	Yes	No	No
03	03_002	Early Termination	52	Female	30OCT15	116	Placebo	<250 mg/day	No	No	<250 mg/day	No	Yes	Yes	Yes	Yes
03	03_003	Entered	25	Male	24NOV15	121	MF4637	<250 mg/day	No	No	<250 mg/day	No	Yes	Yes	Yes	Yes
03	03_004	Entered	56	Female	24NOV15	118	Placebo	<250 mg/day	No	No	>=250 mg/day	No	Yes	Yes	Yes	Yes
03	03_005	Early Termination	49	Female	25NOV15	119	MF4637	>=250 mg/day	No	No	<250 mg/day	No	Yes	Yes	Yes	Yes
03	03_006	Screen Failure	51	Male							<250 mg/day	Yes	No	No	No	No
03	03_007	Entered	40	Male	19NOV15	120	Placebo	<250 mg/day	No	No	<250 mg/day	No	Yes	Yes	Yes	No
03	03_008	Screen Failure	46	Male							>=250 mg/day	Yes	No	No	No	No
03	03_009	Entered	40	Male	13JAN16	122	MF4637	<250 mg/day	No	No	>=250 mg/day	No	Yes	Yes	Yes	Yes
03	03_010	Entered	41	Male	12JAN16	123	Placebo	>=250 mg/day	No	No	>=250 mg/day	No	Yes	Yes	Yes	Yes
03	03_011	Entered	55	Male	11FEB16	188	MF4637	<250 mg/day	No	Yes	<250 mg/day	No	Yes	Yes	Yes	Yes
03	03_012	Entered	63	Male	12FEB16	190	MF4637	<250 mg/day	No	Yes	<250 mg/day	No	Yes	Yes	Yes	Yes
03	03_013	Entered	61	Female	11FEB16	189	Placebo	<250 mg/day	No	Yes	<250 mg/day	No	Yes	Yes	Yes	Yes
04	04_001	Entered	49	Female	13OCT15	124	Placebo	>=250 mg/day	Yes	No	>=250 mg/day	No	Yes	Yes	Yes	Yes
04	04_002	Screen Failure	56	Male							<250 mg/day	Yes	No	No	No	No
04	04_003	Screen Failure	35	Female							<250 mg/day	Yes	No	No	No	No
04	04_004	Entered	34	Male	15OCT15	125	MF4637	<250 mg/day	No	No	<250 mg/day	No	Yes	Yes	Yes	No
04	04_005	Screen Failure	40	Female							<250 mg/day	Yes	No	No	No	No
04	04_006	Screen Failure	54	Female							>=250 mg/day	Yes	No	No	No	No
04	04_007	Screen Failure	59	Female							>=250 mg/day	Yes	No	No	No	No
04	04_008	Screen Failure	25	Female							>=250 mg/day	Yes	No	No	No	No
04	04_009	Entered	53	Female	04JAN16	127	Placebo	<250 mg/day	No	No	<250 mg/day	No	Yes	Yes	Yes	Yes
04	04_010	Entered	25	Female	05JAN16	126	MF4637	>=250 mg/day	No	No	>=250 mg/day	No	Yes	Yes	Yes	Yes
04	04_011	Entered	41	Male	26JAN16	129	Placebo	>=250 mg/day	No	No	>=250 mg/day	No	Yes	Yes	Yes	Yes
04	04_012	Entered	19	Male	19JAN16	128	Placebo	<250 mg/day	No	No	<250 mg/day	No	Yes	Yes	Yes	Yes
04	04_013	Entered	64	Female	15FEB16	130	MF4637	<250 mg/day	No	Yes	<250 mg/day	No	Yes	Yes	Yes	Yes
04	04_014	Entered	35	Female	25FEB16	131	MF4637	>=250 mg/day	No	No	>=250 mg/day	No	Yes	Yes	Yes	Yes
04	04_015	Entered	50	Male	21MAR16	198	Placebo	<250 mg/day	No	Yes	<250 mg/day	No	Yes	Yes	Yes	No
04	04_016	Screen Failure	50	Male								Yes	No	No	No	No
04	04_017	Screen Failure	49	Female								Yes	No	No	No	No
04	04_018	Early Termination	37	Male		197	MF4637	<250 mg/day	No	No	<250 mg/day	No	No	Yes	No	No
04	04_019	Early Termination	50	Female		200	Placebo	<250 mg/day	No	No	<250 mg/day	No	No	Yes	No	No
04	04_020	Entered	44	Male	28JUL16	196	MF4637	<250 mg/day	Yes	No	<250 mg/day	No	Yes	Yes	Yes	Yes
04	04_021	Screen Failure	50	Male							<250 mg/day	Yes	No	No	No	No
04	04_022	Entered	44	Female	28JUL16	199	Placebo	>=250 mg/day	No	No	>=250 mg/day	No	Yes	Yes	Yes	Yes
04	04_023	Entered	56	Male	17AUG16	202	MF4637	>=250 mg/day	No	No	>=250 mg/day	No	Yes	Yes	Yes	Yes
04	04_024	Screen Failure	55	Female							<250 mg/day	Yes	No	No	No	No
04	04_025	Entered	49	Male	25AUG16	203	MF4637	<250 mg/day	No	No	<250 mg/day	No	Yes	Yes	Yes	Yes
04	04_026	Screen Failure	36	Male							>=250 mg/day	Yes	No	No	No	No
04	04_027	Early Termination	39	Female		201	Placebo	>=250 mg/day	No	No	>=250 mg/day	No	No	Yes	No	No
04	04_028	Screen Failure	42	Male								Yes	No	No	No	No
04	04_029	Screen Failure	67	Female								Yes	No	No	No	No
04	04_030	Entered	67	Female	15SEP16	216	MF4637	>=250 mg/day	Yes	No	>=250 mg/day	No	Yes	Yes	Yes	Yes
04	04_031	Entered	56	Male	22SEP16	217	Placebo	<250 mg/day	Yes	No	<250 mg/day	No	Yes	Yes	Yes	Yes
04	04_032	Early Termination	53	Female	22SEP16	218	MF4637	<250 mg/day	No	No	<250 mg/day	No	Yes	Yes	No	No
04	04_033	Screen Failure	42	Female								Yes	No	No	No	No
04	04_034	Screen Failure	52	Male								Yes	No	No	No	No
04	04_035	Entered	59	Female	10OCT16	219	Placebo	>=250 mg/day	No	No	>=250 mg/day	No	Yes	Yes	Yes	Yes
09	09_001	Screen Failure	45	Male							>=250 mg/day	Yes	No	No	No	No
09	09_002	Screen Failure	48	Male							<250 mg/day	Yes	No	No	No	No
09	09_003	Screen Failure	53	Male							<250 mg/day	Yes	No	No	No	No
09	09_004	Entered	48	Male	05FEB16	164	Placebo	>=250 mg/day	Yes	Yes	<250 mg/day	No	Yes	Yes	Yes	Yes
09	09_005	Entered	53	Male	05FEB16	166	MF4637	>=250 mg/day	Yes	Yes	<250 mg/day	No	Yes	Yes	Yes	Yes
09	09_006	Screen Failure	72	Male							<250 mg/day	Yes	No	No	No	No
09	09_007	Screen Failure	49	Female							>=250 mg/day	Yes	No	No	No	No
09	09_008	Entered	49	Male	04MAR16	165	Placebo	<250 mg/day	No	No	<250 mg/day	No	Yes	Yes	Yes	Yes
09	09_009	Screen Failure	73	Female							>=250 mg/day	Yes	No	No	No	No
09	09_010	Screen Failure	73	Female							>=250 mg/day	Yes	No	No	No	No
09	09_011	Screen Failure	68	Female							<250 mg/day	Yes	No	No	No	No
09	09_012	Screen Failure	73	Male							<250 mg/day	Yes	No	No	No	No
09	09_013	Screen Failure	57	Female							<250 mg/day	Yes	No	No	No	No
09	09_014	Screen Failure										Yes	No	No	No	No
09	09_015	Entered	72	Male	04OCT16	167	MF4637	>=250 mg/day	Yes	No	<250 mg/day	No	Yes	Yes	Yes	Yes
09	09_016	Screen Failure	74	Female							<250 mg/day	Yes	No	No	No	No
09	09_017	Screen Failure	69	Female							<250 mg/day	Yes	No	No	No	No
09	09_018	Entered	73	Male	14NOV16	105	Placebo	>=250 mg/day	Yes	No	>=250 mg/day	No	Yes	Yes	Yes	Yes
09	09_019	Screen Failure	74	Female							<250 mg/day	Yes	No	No	No	No
09	09_020	Entered	53	Female	14OCT16	169	MF4637	>=250 mg/day	Yes	No	<250 mg/day	No	Yes	Yes	Yes	Yes
09	09_021	Entered	54	Male	27OCT16	104	MF4637	>=250 mg/day	No	No	<250 mg/day	No	Yes	Yes	Yes	Yes
09	09_022	Screen Failure	55	Male							<250 mg/day	Yes	No	No	No	No
09	09_023	Screen Failure	68	Female							<250 mg/day	Yes	No	No	No	No
09	09_024	Entered	47	Male	04OCT16	168	Placebo	>=250 mg/day	Yes	No	<250 mg/day	No	Yes	Yes	Yes	No
09	09_025	Screen Failure	70	Female							<250 mg/day	Yes	No	No	No	No
09	09_026	Entered	55	Female	12DEC16	171	Placebo	>=250 mg/day	No	No	<250 mg/day	No	Yes	Yes	Yes	Yes
09	09_027	Early Termination	60	Female	12DEC16	107	Placebo	>=250 mg/day	Yes	No	<250 mg/day	No	Yes	Yes	No	No
09	09_028	Screen Failure	44	Female							<250 mg/day	Yes	No	No	No	No
09	09_029	Early Termination	63	Female	12DEC16	106	MF4637	>=250 mg/day	Yes	No	<250 mg/day	No	Yes	Yes	No	No
09	09_030	Entered	59	Female	12DEC16	170	MF4637	>=250 mg/day	No	No	<250 mg/day	No	Yes	Yes	Yes	Yes
10	10_001	Screen Failure	31	Male							>=250 mg/day	Yes	No	No	No	No
10	10_002	Screen Failure	33	Male							<250 mg/day	Yes	No	No	No	No
10	10_003	Screen Failure	54	Female							<250 mg/day	Yes	No	No	No	No
10	10_004	Entered	47	Male	01FEB16	172	MF4637	>=250 mg/day	No	No	>=250 mg/day	No	Yes	Yes	Yes	Yes
10	10_005	Screen Failure	37	Female								Yes	No	No	No	No
10	10_006	Entered	55	Male	25FEB16	174	Placebo	<250 mg/day	No	No	<250 mg/day	No	Yes	Yes	Yes	Yes
10	10_007	Entered	54	Female	01MAR16	173	MF4637	<250 mg/day	No	Yes	<250 mg/day	No	Yes	Yes	Yes	Yes
10	10_008	Screen Failure	64	Female								Yes	No	No	No	No
10	10_009	Entered	64	Female	27JUN16	176	MF4637	<250 mg/day	No	No	<250 mg/day	No	Yes	Yes	Yes	Yes
10	10_010	Entered	34	Male	27SEP16	175	Placebo	>=250 mg/day	No	No	>=250 mg/day	No	Yes	Yes	Yes	Yes
10	10_011	Screen Failure	50	Male								Yes	No	No	No	No
10	10_012	Entered	53	Male	12OCT16	177	Placebo	<250 mg/day	No	Yes	<250 mg/day	No	Yes	Yes	Yes	Yes
10	10_013	Screen Failure	66	Female								Yes	No	No	No	No
11	11_001	Screen Failure	70	Female								Yes	No	No	No	No
11	11_002	Screen Failure	63	Female								Yes	No	No	No	No
11	11_003	Early Termination	52	Male	15SEP16	142	Placebo	<250 mg/day	Yes	Yes	>=250 mg/day	No	Yes	Yes	Yes	Yes
11	11_004	Entered	42	Female	02SEP16	140	MF4637	<250 mg/day	Yes	No	<250 mg/day	No	Yes	Yes	Yes	Yes
11	11_005	Early Termination	63	Male	26SEP16	141	MF4637	>=250 mg/day	No	No	>=250 mg/day	No	Yes	Yes	No	No
11	11_006	Entered	54	Female	29SEP16	146	Placebo	<250 mg/day	Yes	No	>=250 mg/day	No	Yes	Yes	Yes	Yes
11	11_007	Screen Failure	48	Female							>=250 mg/day	Yes	No	No	No	No
11	11_008	Entered	42	Male	27SEP16	144	MF4637	<250 mg/day	No	No	>=250 mg/day	No	Yes	Yes	Yes	Yes
11	11_009	Entered	50	Female	01OCT16	147	Placebo	<250 mg/day	No	No	<250 mg/day	No	Yes	Yes	Yes	Yes
11	11_010	Entered	52	Female	27SEP16	143	Placebo	<250 mg/day	No	Yes	<250 mg/day	No	Yes	Yes	Yes	Yes
11	11_011	Entered	41	Female	19OCT16	244	Placebo	<250 mg/day	No	No	>=250 mg/day	No	Yes	Yes	Yes	Yes
11	11_012	Entered	40	Female	18OCT16	145	MF4637	<250 mg/day	No	No	<250 mg/day	No	Yes	Yes	Yes	Yes
11	11_013	Screen Failure	29	Female								Yes	No	No	No	No
11	11_014	Entered	49	Female	17NOV16	247	Placebo	>=250 mg/day	No	No	>=250 mg/day	No	Yes	Yes	Yes	No
11	11_015	Entered	62	Male	10NOV16	245	MF4637	<250 mg/day	No	No	>=250 mg/day	No	Yes	Yes	Yes	Yes
11	11_016	Screen Failure	55	Female							>=250 mg/day	Yes	No	No	No	No
11	11_017	Entered	32	Female	28NOV16	246	MF4637	<250 mg/day	No	No	<250 mg/day	No	Yes	Yes	Yes	Yes
11	11_018	Entered	45	Female	29NOV16	248	Placebo	<250 mg/day	No	No	>=250 mg/day	No	Yes	Yes	Yes	Yes
12	12_001	Entered	66	Male	14OCT16	257	MF4637	>=250 mg/day	Yes	Yes	>=250 mg/day	No	Yes	Yes	Yes	Yes
12	12_002	Screen Failure	71	Male								Yes	No	No	No	No
12	12_003	Entered	52	Male	11OCT16	138	Placebo	>=250 mg/day	Yes	No	>=250 mg/day	No	Yes	Yes	Yes	Yes
12	12_004	Entered	70	Male	22SEP16	133	Placebo	>=250 mg/day	Yes	Yes	>=250 mg/day	No	Yes	Yes	Yes	Yes
12	12_005	Screen Failure	72	Female								Yes	No	No	No	No
12	12_006	Entered	76	Female	22SEP16	132	MF4637	<250 mg/day	Yes	Yes	<250 mg/day	No	Yes	Yes	Yes	Yes
12	12_007	Entered	64	Female	30SEP16	134	Placebo	>=250 mg/day	No	Yes	>=250 mg/day	No	Yes	Yes	Yes	Yes
12	12_008	Screen Failure	68	Female								Yes	No	No	No	No
12	12_009	Early Termination	53	Female	26OCT16	260	MF4637	>=250 mg/day	Yes	Yes	>=250 mg/day	No	Yes	Yes	Yes	Yes
12	12_010	Screen Failure	72	Male								Yes	No	No	No	No
12	12_011	Screen Failure	77	Male								Yes	No	No	No	No
12	12_012	Screen Failure	51	Female								Yes	No	No	No	No
12	12_013	Entered	52	Female	30SEP16	137	MF4637	>=250 mg/day	No	Yes	>=250 mg/day	No	Yes	Yes	Yes	Yes
12	12_014	Entered	66	Female	30SEP16	136	Placebo	>=250 mg/day	Yes	Yes	>=250 mg/day	No	Yes	Yes	Yes	Yes
12	12_015	Early Termination	47	Female	30SEP16	135	MF4637	>=250 mg/day	Yes	Yes	>=250 mg/day	No	Yes	Yes	Yes	Yes
12	12_016	Entered	52	Female	05OCT16	103	MF4637	<250 mg/day	No	No	<250 mg/day	No	Yes	Yes	Yes	Yes
12	12_017	Entered	57	Female	05OCT16	100	Placebo	>=250 mg/day	Yes	Yes	>=250 mg/day	No	Yes	Yes	Yes	Yes
12	12_018	Screen Failure	77	Female								Yes	No	No	No	No
12	12_019	Entered	53	Male	05OCT16	102	Placebo	<250 mg/day	Yes	Yes	<250 mg/day	No	Yes	Yes	Yes	Yes
12	12_020	Entered	60	Female	05OCT16	101	MF4637	>=250 mg/day	Yes	Yes	>=250 mg/day	No	Yes	Yes	Yes	Yes
12	12_021	Entered	54	Male	11OCT16	254	MF4637	>=250 mg/day	Yes	Yes	>=250 mg/day	No	Yes	Yes	Yes	Yes
12	12_022	Entered	43	Male	12OCT16	253	Placebo	<250 mg/day	Yes	No	<250 mg/day	No	Yes	Yes	Yes	Yes
12	12_023	Screen Failure	44	Female								Yes	No	No	No	No
12	12_024	Early Termination	41	Female	11OCT16	139	MF4637	>=250 mg/day	Yes	No	>=250 mg/day	No	Yes	Yes	Yes	Yes
12	12_025	Entered	73	Male	14OCT16	258	MF4637	>=250 mg/day	Yes	No	>=250 mg/day	No	Yes	Yes	Yes	Yes
12	12_026	Screen Failure	62	Male								Yes	No	No	No	No
12	12_027	Entered	56	Female	12OCT16	252	Placebo	<250 mg/day	No	Yes	<250 mg/day	No	Yes	Yes	Yes	Yes
12	12_028	Entered	71	Female	14OCT16	259	Placebo	<250 mg/day	Yes	Yes	<250 mg/day	No	Yes	Yes	Yes	Yes
12	12_029	Entered	72	Male	12OCT16	256	Placebo	>=250 mg/day	Yes	Yes	>=250 mg/day	No	Yes	Yes	Yes	Yes
12	12_030	Entered	56	Male	12OCT16	255	MF4637	<250 mg/day	Yes	Yes	<250 mg/day	No	Yes	Yes	Yes	Yes
12	12_031	Screen Failure	54	Female								Yes	No	No	No	No
12	12_032	Entered	67	Male	02NOV16	280	Placebo	>=250 mg/day	Yes	No	>=250 mg/day	No	Yes	Yes	Yes	Yes
12	12_033	Entered	72	Female	02NOV16	282	MF4637	>=250 mg/day	Yes	No	>=250 mg/day	No	Yes	Yes	Yes	Yes
12	12_034	Entered	55	Female	26OCT16	261	Placebo	>=250 mg/day	Yes	No	>=250 mg/day	No	Yes	Yes	Yes	No
12	12_035	Screen Failure	52	Female								Yes	No	No	No	No
12	12_036	Screen Failure	51	Male								Yes	No	No	No	No
12	12_037	Screen Failure	46	Female								Yes	No	No	No	No
12	12_038	Entered	62	Male	26OCT16	263	Placebo	>=250 mg/day	Yes	Yes	>=250 mg/day	No	Yes	Yes	Yes	Yes
12	12_039	Entered	57	Male	26OCT16	262	MF4637	<250 mg/day	No	No	<250 mg/day	No	Yes	Yes	Yes	Yes
12	12_040	Entered	60	Female	10NOV16	292	MF4637	>=250 mg/day	Yes	Yes	>=250 mg/day	No	Yes	Yes	Yes	Yes
12	12_041	Early Termination	54	Female	10NOV16	293	Placebo	>=250 mg/day	Yes	Yes	>=250 mg/day	No	Yes	Yes	Yes	Yes
12	12_042	Screen Failure	62	Male								Yes	No	No	No	No
12	12_043	Entered	77	Male	03NOV16	283	MF4637	>=250 mg/day	Yes	Yes	>=250 mg/day	No	Yes	Yes	Yes	Yes
12	12_044	Entered	66	Male	02NOV16	281	Placebo	>=250 mg/day	Yes	Yes	>=250 mg/day	No	Yes	Yes	Yes	Yes
12	12_045	Screen Failure	65	Female								Yes	No	No	No	No
12	12_046	Entered	75	Male	03NOV16	284	MF4637	>=250 mg/day	Yes	Yes	>=250 mg/day	No	Yes	Yes	Yes	Yes
12	12_047	Screen Failure	46	Male							<250 mg/day	Yes	No	No	No	No
12	12_048	Entered	63	Female	03NOV16	285	MF4637	<250 mg/day	Yes	No	<250 mg/day	No	Yes	Yes	Yes	Yes
12	12_049	Screen Failure	49	Male								Yes	No	No	No	No
12	12_050	Screen Failure	69	Female								Yes	No	No	No	No
12	12_051	Screen Failure	65	Male								Yes	No	No	No	No
12	12_052	Screen Failure	51	Female								Yes	No	No	No	No
12	12_053	Screen Failure	53	Male								Yes	No	No	No	No
12	12_054	Entered	60	Female	03NOV16	286	Placebo	>=250 mg/day	Yes	Yes	>=250 mg/day	No	Yes	Yes	Yes	Yes
12	12_055	Screen Failure	70	Female								Yes	No	No	No	No
12	12_056	Early Termination	61	Male	03NOV16	287	Placebo	<250 mg/day	Yes	Yes	<250 mg/day	No	Yes	Yes	Yes	Yes
12	12_057	Entered	65	Female	10NOV16	294	Placebo	<250 mg/day	Yes	No	<250 mg/day	No	Yes	Yes	Yes	Yes
12	12_058	Entered	68	Male	16NOV16	181	Placebo	<250 mg/day	Yes	Yes	<250 mg/day	No	Yes	Yes	Yes	Yes
12	12_059	Screen Failure	67	Female								Yes	No	No	No	No
12	12_060	Screen Failure	48	Female								Yes	No	No	No	No
12	12_061	Screen Failure	72	Male								Yes	No	No	No	No
12	12_062	Entered	53	Male	16NOV16	295	MF4637	<250 mg/day	Yes	No	<250 mg/day	No	Yes	Yes	Yes	Yes
12	12_063	Screen Failure	71	Female								Yes	No	No	No	No
12	12_064	Screen Failure	72	Female								Yes	No	No	No	No
12	12_065	Entered	76	Female	16NOV16	182	MF4637	<250 mg/day	Yes	Yes	<250 mg/day	No	Yes	Yes	Yes	Yes
12	12_066	Screen Failure	59	Male								Yes	No	No	No	No
12	12_067	Entered	72	Female	16NOV16	180	MF4637	>=250 mg/day	Yes	Yes	>=250 mg/day	No	Yes	Yes	Yes	Yes
12	12_068	Entered	78	Female	21NOV16	183	Placebo	>=250 mg/day	Yes	Yes	>=250 mg/day	No	Yes	Yes	Yes	Yes
12	12_069	Screen Failure	82	Male								Yes	No	No	No	No
12	12_070	Screen Failure	56	Female								Yes	No	No	No	No
12	12_071	Screen Failure	58	Female								Yes	No	No	No	No
12	12_072	Screen Failure	56	Female								Yes	No	No	No	No
12	12_073	Screen Failure	60	Female								Yes	No	No	No	No
12	12_074	Screen Failure	63	Female								Yes	No	No	No	No
13	13_001	Entered	42	Female	28OCT16	162	Placebo	<250 mg/day	No	No	>=250 mg/day	No	Yes	Yes	Yes	Yes
13	13_002	Entered	67	Female	20OCT16	204	MF4637	<250 mg/day	Yes	Yes	<250 mg/day	No	Yes	Yes	Yes	Yes
13	13_003	Entered	65	Female	20OCT16	205	Placebo	<250 mg/day	Yes	Yes	<250 mg/day	No	Yes	Yes	Yes	Yes
13	13_004	Entered	69	Female	20OCT16	206	MF4637	<250 mg/day	No	Yes	<250 mg/day	No	Yes	Yes	Yes	Yes
13	13_005	Entered	48	Male	10NOV16	276	MF4637	<250 mg/day	No	No	<250 mg/day	No	Yes	Yes	Yes	Yes
13	13_006	Entered	40	Male	28OCT16	160	MF4637	<250 mg/day	No	No	<250 mg/day	No	Yes	Yes	Yes	Yes
13	13_007	Screen Failure	57	Female								Yes	No	No	No	No
13	13_008	Screen Failure	67	Male								Yes	No	No	No	No
13	13_009	Entered	51	Male	05NOV16	267	Placebo	<250 mg/day	No	Yes	>=250 mg/day	No	Yes	Yes	Yes	Yes
13	13_010	Screen Failure	59	Female								Yes	No	No	No	No
13	13_011	Entered	43	Male	28OCT16	207	Placebo	<250 mg/day	No	No	<250 mg/day	No	Yes	Yes	Yes	Yes
13	13_012	Screen Failure	43	Male							<250 mg/day	Yes	No	No	No	No
13	13_013	Entered	46	Male	28OCT16	161	MF4637	<250 mg/day	No	No	>=250 mg/day	No	Yes	Yes	Yes	Yes
13	13_014	Entered	71	Female	03NOV16	266	Placebo	<250 mg/day	No	Yes	<250 mg/day	No	Yes	Yes	Yes	Yes
13	13_015	Entered	75	Male	03NOV16	264	MF4637	<250 mg/day	No	Yes	<250 mg/day	No	Yes	Yes	Yes	Yes
13	13_016	Entered	70	Female	28OCT16	163	Placebo	<250 mg/day	No	Yes	>=250 mg/day	No	Yes	Yes	Yes	Yes
13	13_017	Entered	52	Female	03NOV16	265	MF4637	<250 mg/day	Yes	Yes	>=250 mg/day	No	Yes	Yes	Yes	Yes
13	13_018	Screen Failure	50	Female								Yes	No	No	No	No
13	13_019	Entered	47	Female	23NOV16	278	Placebo	<250 mg/day	No	No	<250 mg/day	No	Yes	Yes	Yes	Yes
13	13_020	Entered	55	Male	17NOV16	277	Placebo	<250 mg/day	No	No	<250 mg/day	No	Yes	Yes	Yes	Yes
14	14_001	Entered	61	Male	25OCT16	185	Placebo	>=250 mg/day	No	Yes	>=250 mg/day	No	Yes	Yes	Yes	Yes
14	14_002	Entered	44	Female	12OCT16	208	MF4637	<250 mg/day	No	Yes	>=250 mg/day	No	Yes	Yes	Yes	Yes
14	14_003	Screen Failure	36	Female								Yes	No	No	No	No
14	14_004	Screen Failure	32	Female								Yes	No	No	No	No
14	14_005	Screen Failure	28	Male								Yes	No	No	No	No
14	14_006	Screen Failure	33	Female							>=250 mg/day	Yes	No	No	No	No
14	14_007	Screen Failure	55	Female								Yes	No	No	No	No
14	14_008	Screen Failure	56	Male								Yes	No	No	No	No
14	14_009	Screen Failure	69	Male								Yes	No	No	No	No
14	14_010	Early Termination	61	Female		184	MF4637	<250 mg/day	No	No	>=250 mg/day	No	No	Yes	No	No
14	14_011	Screen Failure	66	Female								Yes	No	No	No	No
14	14_012	Early Termination	34	Male	15NOV16	186	Placebo	<250 mg/day	No	No	>=250 mg/day	No	Yes	Yes	Yes	Yes
14	14_013	Screen Failure	70	Female								Yes	No	No	No	No
14	14_014	Entered	33	Female	16NOV16	187	MF4637	<250 mg/day	No	No	>=250 mg/day	No	Yes	Yes	Yes	Yes
14	14_015	Screen Failure	57	Female								Yes	No	No	No	No
14	14_016	Entered	51	Female	01DEC16	209	Placebo	<250 mg/day	No	No	<250 mg/day	No	Yes	Yes	Yes	Yes
14	14_017	Screen Failure	53	Female								Yes	No	No	No	No
14	14_018	Entered	25	Female	05DEC16	210	MF4637	>=250 mg/day	No	No	>=250 mg/day	No	Yes	Yes	Yes	Yes
14	14_019	Entered	32	Male	03DEC16	211	Placebo	<250 mg/day	No	Yes	<250 mg/day	No	Yes	Yes	Yes	Yes
14	14_020	Screen Failure	53	Male								Yes	No	No	No	No
14	14_022	Screen Failure	54	Female								Yes	No	No	No	No
15	15_001	Screen Failure	45	Male							>=250 mg/day	Yes	No	No	No	No
15	15_002	Entered	67	Male	27SEP16	149	Placebo	<250 mg/day	No	No	<250 mg/day	No	Yes	Yes	Yes	Yes
15	15_003	Screen Failure	20	Male							>=250 mg/day	Yes	No	No	No	No
15	15_004	Screen Failure	72	Male							<250 mg/day	Yes	No	No	No	No
15	15_005	Entered	58	Male	28SEP16	150	Placebo	<250 mg/day	No	No	>=250 mg/day	No	Yes	Yes	Yes	Yes
15	15_006	Entered	69	Male	27SEP16	148	MF4637	<250 mg/day	No	No	>=250 mg/day	No	Yes	Yes	Yes	Yes
15	15_007	Entered	74	Male	29SEP16	236	Placebo	<250 mg/day	No	No	>=250 mg/day	No	Yes	Yes	Yes	Yes
15	15_008	Entered	55	Male	28SEP16	151	MF4637	<250 mg/day	No	No	<250 mg/day	No	Yes	Yes	Yes	Yes
15	15_009	Entered	70	Female	10OCT16	237	MF4637	<250 mg/day	No	No	<250 mg/day	No	Yes	Yes	Yes	Yes
15	15_010	Entered	64	Female	11OCT16	238	Placebo	<250 mg/day	No	No	<250 mg/day	No	Yes	Yes	Yes	Yes
15	15_011	Entered	66	Male	13OCT16	240	Placebo	<250 mg/day	No	No	<250 mg/day	No	Yes	Yes	Yes	Yes
15	15_012	Entered	54	Female	19OCT16	241	Placebo	<250 mg/day	No	No	<250 mg/day	No	Yes	Yes	Yes	Yes
15	15_013	Entered	58	Female	13OCT16	242	MF4637	<250 mg/day	No	No	>=250 mg/day	No	Yes	Yes	Yes	Yes
15	15_014	Entered	55	Female	13OCT16	239	MF4637	<250 mg/day	No	No	>=250 mg/day	No	Yes	Yes	Yes	Yes
15	15_015	Entered	81	Female	09NOV16	268	MF4637	<250 mg/day	No	No	<250 mg/day	No	Yes	Yes	Yes	Yes
15	15_016	Entered	77	Female	09NOV16	243	MF4637	<250 mg/day	Yes	No	>=250 mg/day	No	Yes	Yes	Yes	Yes
15	15_017	Entered	62	Male	10NOV16	270	Placebo	<250 mg/day	No	No	<250 mg/day	No	Yes	Yes	Yes	No
15	15_018	Entered	57	Male	15NOV16	269	MF4637	<250 mg/day	No	No	<250 mg/day	No	Yes	Yes	Yes	Yes
15	15_019	Entered	38	Female	17NOV16	271	Placebo	<250 mg/day	No	No	>=250 mg/day	No	Yes	Yes	Yes	Yes
15	15_020	Early Termination	65	Female	30NOV16	272	MF4637	<250 mg/day	No	No	>=250 mg/day	No	Yes	Yes	Yes	Yes
15	15_021	Entered	41	Male	02DEC16	273	Placebo	<250 mg/day	No	No	>=250 mg/day	No	Yes	Yes	Yes	Yes
15	15_022	Entered	48	Male	09DEC16	274	Placebo	<250 mg/day	No	No	<250 mg/day	No	Yes	Yes	Yes	Yes
15	15_023	Entered	58	Female	06DEC16	275	MF4637	<250 mg/day	No	No	>=250 mg/day	No	Yes	Yes	Yes	Yes
15	15_024	Screen Failure	74	Female							<250 mg/day	Yes	No	No	No	No
15	15_025	Screen Failure	69	Female								Yes	No	No	No	No
15	15_026	Screen Failure	70	Female							>=250 mg/day	Yes	No	No	No	No
16	16_001	Early Termination	53	Male	31OCT16	152	Placebo	<250 mg/day	No	No	<250 mg/day	No	Yes	Yes	Yes	Yes
16	16_002	Early Termination	53	Male	03NOV16	154	MF4637	<250 mg/day	No	No	<250 mg/day	No	Yes	Yes	Yes	Yes
16	16_003	Entered	59	Male	03NOV16	153	Placebo	>=250 mg/day	No	No	>=250 mg/day	No	Yes	Yes	Yes	Yes
16	16_004	Screen Failure	50	Male								Yes	No	No	No	No
16	16_005	Entered	60	Male	12NOV16	155	MF4637	<250 mg/day	No	No	<250 mg/day	No	Yes	Yes	Yes	Yes
16	16_006	Screen Failure	57	Female								Yes	No	No	No	No
16	16_007	Entered	57	Female	28NOV16	156	Placebo	>=250 mg/day	No	No	>=250 mg/day	No	Yes	Yes	Yes	Yes
16	16_008	Entered	58	Female	18NOV16	158	MF4637	>=250 mg/day	No	No	>=250 mg/day	No	Yes	Yes	Yes	Yes
17	17_001	Entered	71	Male	08NOV16	212	Placebo	<250 mg/day	No	No	<250 mg/day	No	Yes	Yes	Yes	Yes
17	17_002	Entered	70	Female	10NOV16	192	MF4637	<250 mg/day	Yes	No	<250 mg/day	No	Yes	Yes	Yes	Yes
17	17_003	Entered	62	Female	10NOV16	193	MF4637	>=250 mg/day	Yes	No	<250 mg/day	No	Yes	Yes	Yes	Yes
17	17_004	Screen Failure	65	Male							<250 mg/day	Yes	No	No	No	No
17	17_005	Entered	65	Female	16NOV16	213	MF4637	<250 mg/day	No	No	<250 mg/day	No	Yes	Yes	Yes	Yes
17	17_006	Entered	61	Female	21NOV16	194	Placebo	<250 mg/day	No	No	<250 mg/day	No	Yes	Yes	Yes	Yes
17	17_007	Entered	61	Male	21NOV16	214	MF4637	<250 mg/day	No	No	<250 mg/day	No	Yes	Yes	Yes	Yes
17	17_008	Entered	67	Female	25NOV16	195	Placebo	<250 mg/day	Yes	No	<250 mg/day	No	Yes	Yes	Yes	Yes
17	17_009	Entered	70	Male	25NOV16	215	Placebo	<250 mg/day	No	No	<250 mg/day	No	Yes	Yes	Yes	Yes
17	17_010	Entered	68	Female	25NOV16	230	MF4637	<250 mg/day	No	No	<250 mg/day	No	Yes	Yes	Yes	Yes
17	17_011	Screen Failure	58	Female							<250 mg/day	Yes	No	No	No	No
18	18_001	Entered	46	Female	18OCT16	220	Placebo	<250 mg/day	No	No	<250 mg/day	No	Yes	Yes	Yes	Yes
18	18_002	Entered	52	Female	24OCT16	222	MF4637	<250 mg/day	No	No	<250 mg/day	No	Yes	Yes	Yes	Yes
18	18_003	Entered	55	Female	26OCT16	221	Placebo	>=250 mg/day	Yes	Yes	>=250 mg/day	No	Yes	Yes	Yes	Yes
19	19_001	Entered	53	Female	28OCT16	225	Placebo	<250 mg/day	No	No	>=250 mg/day	No	Yes	Yes	Yes	Yes
19	19_002	Entered	37	Male	27OCT16	224	MF4637	<250 mg/day	No	No	<250 mg/day	No	Yes	Yes	Yes	Yes
19	19_003	Screen Failure	59	Female							>=250 mg/day	Yes	No	No	No	No
19	19_004	Entered	53	Female	04NOV16	226	MF4637	<250 mg/day	No	No	>=250 mg/day	No	Yes	Yes	Yes	Yes
19	19_005	Entered	51	Male	04NOV16	227	Placebo	<250 mg/day	No	No	<250 mg/day	No	Yes	Yes	Yes	Yes
19	19_006	Screen Failure	73	Male							<250 mg/day	Yes	No	No	No	No
19	19_007	Entered	50	Male	21NOV16	289	MF4637	<250 mg/day	No	No	>=250 mg/day	No	Yes	Yes	Yes	Yes
19	19_008	Screen Failure	65	Female							>=250 mg/day	Yes	No	No	No	No
19	19_009	Entered	49	Female	21NOV16	290	Placebo	<250 mg/day	No	No	>=250 mg/day	No	Yes	Yes	Yes	Yes
19	19_010	Entered	33	Male	21NOV16	291	MF4637	<250 mg/day	No	No	>=250 mg/day	No	Yes	Yes	Yes	Yes
19	19_011	Screen Failure	72	Female							>=250 mg/day	Yes	No	No	No	No
19	19_012	Entered	55	Female	21NOV16	288	Placebo	<250 mg/day	Yes	No	>=250 mg/day	No	Yes	Yes	Yes	Yes
19	19_013	Screen Failure	65	Female							>=250 mg/day	Yes	No	No	No	No
