# Supplementary material for: Evaluation of a High Concentrate Omega-3 for Correcting the Omega-3 Fatty Acid Nutritional Deficiency in Non-alcoholic Fatty Liver Disease and effects on Hepatic Steatosis (CONDIN)
Source: Preprints.org preprint supplement (doi:10.20944/preprints201807.0240.v1), 2018-07-13
Supplement: Supplementary file 9 [file IE.xlsx]

## Sheet: IE
E1	E10	E11	E12	E13	E13VA3	E14	E15	E16	E17	E18	E19	E2	E20	E21	E3	E4	E5	E6	E7	E8	E9	I1	I1VA4	I2	I2VA4	I3	I3VA4	I4	I4VA3	I4VA4	I5	I6	IEMETYN	IEPRVER	SUBJID	SITE	STATUS	AGE	SEX	FIRSTDT	RANDNO	TREAT	OMEGA	DIABETE	STATIN	OMEGA_C	SFFL	SAFETY	ITT
No	No	No	Not applicable	No		No	No	No	No	No	No	No	No	No	No	No	No	No	No	No	No	Yes		Yes		Yes		Yes			Yes	Yes	Yes	A2 v6.2 18-Aug-2015	02_001	02	Entered	57	Female	27OCT15	108	MF4637	<250 mg/day	Yes	Yes	<250 mg/day	No	Yes	Yes
No	No	No	Not applicable	No		No	No	No	No	No	No	No	No	No	No	No	No	No	No	No	No	Yes		Yes		Yes		Yes			Yes	Yes	Yes	A2 v6.2 18-Aug-2015	02_002	02	Entered	41	Male	06NOV15	109	MF4637	<250 mg/day	No	Yes	>=250 mg/day	No	Yes	Yes
No	No	No	Not applicable	No		No	No	No	No	No	No	No	No	No	No	No	No	No	No	No	No	Yes		Yes		Yes		Yes			Yes	Yes	Yes	A2 v6.2 18-Aug-2015	02_003	02	Entered	58	Male	03NOV15	110	Placebo	>=250 mg/day	Yes	Yes	<250 mg/day	No	Yes	Yes
No	No	No	No	No		No	No	No	No	No	No	No	No	No	No	No	No	No	No	No	No	Yes		Yes		Yes		Yes			Yes	Yes	Yes	A2 v6.2 18-Aug-2015	02_004	02	Early Termination	60	Female	12NOV15	111	Placebo	<250 mg/day	Yes	Yes	<250 mg/day	No	Yes	Yes
No	No	No	Not applicable	No		No	No	No	No	No	No	No	No	No	No	No	No	No	No	No	No	Yes		Yes		Yes		Yes			Yes	Yes	Yes	A2 v6.2 18-Aug-2015	02_005	02	Entered	65	Male	04DEC15	112	Placebo	>=250 mg/day	No	No	>=250 mg/day	No	Yes	Yes
No	No	No	No	No		No	No	No	No	No	No	No	No	No	No	No	No	No	No	No	No	Yes		Yes		Yes		Yes			Not applicable	Yes	Yes	A2 v6.2 18-Aug-2015	02_006	02	Screen Failure	39	Female							<250 mg/day	Yes	No	No
No	No	No	Not applicable	No		No	No	Yes	No	No	No	No	No	No	No	No	No	No	No	No	No	Yes		Yes		Yes		Yes			Not applicable	Yes	No	A2 v6.2 18-Aug-2015	03_001	03	Early Termination	53	Male	19NOV15	117	MF4637	<250 mg/day	No	No	>=250 mg/day	No	Yes	Yes
No	No	No	No	No		No	No	No	No	No	No	No	No	No	No	No	No	No	No	No	No	Yes		Yes		Yes		Yes			Yes	Yes	Yes	A2 v6.2 18-Aug-2015	03_002	03	Early Termination	52	Female	30OCT15	116	Placebo	<250 mg/day	No	No	<250 mg/day	No	Yes	Yes
No	No	No	Not applicable		No	No	No	No	No	No	No	No	No	No	No	No	No	No	No	No	No	Yes		Yes		Yes			Yes		Yes	Yes	Yes	A3 v7 07-Dec-2015	03_003	03	Entered	25	Male	24NOV15	121	MF4637	<250 mg/day	No	No	<250 mg/day	No	Yes	Yes
No	No	No	Not applicable	No		No	No	No	No	No	No	No	No	No	No	No	No	No	No	No	No	Yes		Yes		Yes		Yes			Yes	Yes	Yes	A2 v6.2 18-Aug-2015	03_004	03	Entered	56	Female	24NOV15	118	Placebo	<250 mg/day	No	No	>=250 mg/day	No	Yes	Yes
No	No	No	No	No		No	No	No	No	No	No	No	No	No	No	No	No	No	No	No	No	Yes		Yes		Yes		Yes			Not applicable	Yes	Yes	A2 v6.2 18-Aug-2015	03_005	03	Early Termination	49	Female	25NOV15	119	MF4637	>=250 mg/day	No	No	<250 mg/day	No	Yes	Yes
No	No	No	Not applicable	No		No	No	Yes	No	No	No	No	No	No	No	No	No	No	No	No	No	Yes		Yes		No		Yes			Not applicable	Yes	No	A2 v6.2 18-Aug-2015	03_006	03	Screen Failure	51	Male							<250 mg/day	Yes	No	No
No	No	No	Not applicable		No	No	No	No	No	No	No	No	No	No	No	No	No	No	No	No	No	Yes		Yes		Yes			Yes		Not applicable	Yes	Yes	A3 v7 07-Dec-2015	03_007	03	Entered	40	Male	19NOV15	120	Placebo	<250 mg/day	No	No	<250 mg/day	No	Yes	Yes
No	No	No	Not applicable	No		No	No	No	No	No	No	No	No	No	No	No	No	No	No	No	Yes	Yes		Yes		Yes		Yes			Not applicable	Yes	No	A2 v6.2 18-Aug-2015	03_008	03	Screen Failure	46	Male							>=250 mg/day	Yes	No	No
No	No	No	Not applicable	No		No	No	No	No	No	No	No	No	No	No	No	No	No	No	No	No	Yes		Yes		Yes		Yes			Yes	Yes	Yes	A2 v6.2 18-Aug-2015	03_009	03	Entered	40	Male	13JAN16	122	MF4637	<250 mg/day	No	No	>=250 mg/day	No	Yes	Yes
No	No	No	Not applicable	No		No	No	No	No	No	No	No	No	No	No	No	No	No	No	No	No	Yes		Yes		Yes		Yes			Not applicable	Yes	Yes	A2 v6.2 18-Aug-2015	03_010	03	Entered	41	Male	12JAN16	123	Placebo	>=250 mg/day	No	No	>=250 mg/day	No	Yes	Yes
No	No	No	Not applicable		No	No	No	No	No	No	No	No	No	No	No	No	No	No	No	No	No	Yes		Yes		Yes			Yes		Not applicable	Yes	Yes	A3 v7 07-Dec-2015	03_011	03	Entered	55	Male	11FEB16	188	MF4637	<250 mg/day	No	Yes	<250 mg/day	No	Yes	Yes
No	No	No	Not applicable		No	No	No	No	No	No	No	No	No	No	No	No	No	No	No	No	No	Yes		Yes		Yes			Yes		Yes	Yes	Yes	A3 v7 07-Dec-2015	03_012	03	Entered	63	Male	12FEB16	190	MF4637	<250 mg/day	No	Yes	<250 mg/day	No	Yes	Yes
No	No	No	No		No	No	No	No	No	No	No	No	No	No	No	No	No	No	No	No	No	Yes		Yes		Yes			Yes		Yes	Yes	Yes	A3 v7 07-Dec-2015	03_013	03	Entered	61	Female	11FEB16	189	Placebo	<250 mg/day	No	Yes	<250 mg/day	No	Yes	Yes
No	No	No	No	No		No	No	No	No	No	No	No	No	No	No	No	No	No	No	No	No	Yes		Yes		Yes		Yes			Not applicable	Yes	Yes	A2 v6.2 18-Aug-2015	04_001	04	Entered	49	Female	13OCT15	124	Placebo	>=250 mg/day	Yes	No	>=250 mg/day	No	Yes	Yes
No	No	No	Not applicable	No		No	No	No	No	No	No	No	No	No	Yes	No	No	No	No	No	No	Yes		Yes		Yes		Yes			No	Yes	No	A2 v6.2 18-Aug-2015	04_002	04	Screen Failure	56	Male							<250 mg/day	Yes	No	No
Yes	No	No	No		No	No	No	No	No	No	No	No	No	No	Yes	No	No	Yes	No	No	No	Yes		Yes		Yes			No		No	Yes	No	A3 v7 07-Dec-2015	04_003	04	Screen Failure	35	Female							<250 mg/day	Yes	No	No
No	No	No	Not applicable	No		No	No	No	No	No	No	No	No	No	No	No	No	No	No	No	No	Yes		Yes		Yes		Yes			Not applicable	Yes	Yes	A2 v6.2 18-Aug-2015	04_004	04	Entered	34	Male	15OCT15	125	MF4637	<250 mg/day	No	No	<250 mg/day	No	Yes	Yes
Yes	No	No	No		No	No	No	No	No	No	No	No	No	No	No	No	No	No	No	No	No	Yes		Yes		Yes			Yes		Yes	Yes	No	A3 v7 07-Dec-2015	04_005	04	Screen Failure	40	Female							<250 mg/day	Yes	No	No
Yes	No	No	No		No	No	No	No	No	No	No	No	No	No	No	No	No	No	No	No	No	Yes		Yes		Yes			Yes		No	Yes	No	A3 v7 07-Dec-2015	04_006	04	Screen Failure	54	Female							>=250 mg/day	Yes	No	No
Yes	No	No	No		No	No	No	No	No	No	No	No	No	No	No	No	No	No	No	No	No	Yes		Yes		Yes			Yes		No	Yes	No	A3 v7 07-Dec-2015	04_007	04	Screen Failure	59	Female							>=250 mg/day	Yes	No	No
Yes	No	No	No		No	No	No	No	No	No	No	No	No	No	No	No	No	Yes	Yes	Yes	Yes	Yes		No		Yes			Yes		No	Yes	No	A3 v7 07-Dec-2015	04_008	04	Screen Failure	25	Female							>=250 mg/day	Yes	No	No
No	No	No	No		No	No	No	No	No	No	No	No	No	No	No	No	No	No	No	No	No	Yes		Yes		Yes			Yes		Not applicable	Yes	Yes	A3 v7 07-Dec-2015	04_009	04	Entered	53	Female	04JAN16	127	Placebo	<250 mg/day	No	No	<250 mg/day	No	Yes	Yes
No	No	No	No		No	No	No	No	No	No	No	No	No	No	No	No	No	No	No	No	No	Yes		Yes		Yes			Yes		Not applicable	Yes	Yes	A3 v7 07-Dec-2015	04_010	04	Entered	25	Female	05JAN16	126	MF4637	>=250 mg/day	No	No	>=250 mg/day	No	Yes	Yes
No	No	No	Not applicable		No	No	No	No	No	No	No	No	No	No	No	No	No	No	No	No	No	Yes		Yes		Yes			Yes		Not applicable	Yes	Yes	A3 v7 07-Dec-2015	04_011	04	Entered	41	Male	26JAN16	129	Placebo	>=250 mg/day	No	No	>=250 mg/day	No	Yes	Yes
No	No	No	No		No	No	No	No	No	No	No	No	No	No	No	No	No	No	No	No	No	Yes		Yes		Yes			Yes		Not applicable	Yes	Yes	A3 v7 07-Dec-2015	04_012	04	Entered	19	Male	19JAN16	128	Placebo	<250 mg/day	No	No	<250 mg/day	No	Yes	Yes
No	No	No	No		No	No	No	No	No	No	No	No	No	No	No	No	No	No	No	No	No	Yes		Yes		Yes			Yes		Yes	Yes	Yes	A3 v7 07-Dec-2015	04_013	04	Entered	64	Female	15FEB16	130	MF4637	<250 mg/day	No	Yes	<250 mg/day	No	Yes	Yes
No	No	No	No		No	No	No	No	No	No	No	No	No	No	No	No	No	No	No	No	No	Yes		Yes		Yes			Yes		Not applicable	Yes	Yes	A3 v7 07-Dec-2015	04_014	04	Entered	35	Female	25FEB16	131	MF4637	>=250 mg/day	No	No	>=250 mg/day	No	Yes	Yes
No	No	No	Not applicable		No	No	No	No	No	No	No	No	No	No	No	No	No	No	No	No	No	Yes		Yes		Yes			Yes		Yes	Yes	Yes	A3 v7 07-Dec-2015	04_015	04	Entered	50	Male	21MAR16	198	Placebo	<250 mg/day	No	Yes	<250 mg/day	No	Yes	Yes
No	No	No	Not applicable		No	No	No	No	No	No	No	No	No	No	No	No	No	No	No	No	No	Yes		Yes		Yes			Yes		Yes	No	No	A3 v7 07-Dec-2015	04_016	04	Screen Failure	50	Male								Yes	No	No
No	No	No	Not applicable	No		No	No	No	No	No	No	No	No	No	No	No	No	No	No	No	No	Yes		Yes		Yes		Yes			Not applicable	No	No	A2 v6.2 18-Aug-2015	04_017	04	Screen Failure	49	Female								Yes	No	No
No	No	No	Not applicable		No	No	No	No	No	No	No	No	No	No	No	No	No	No	No	No	No		Yes		Yes		Yes			Yes	Not applicable	Yes	Yes	A4 v7.1 22-Jan-2016	04_018	04	Early Termination	37	Male		197	MF4637	<250 mg/day	No	No	<250 mg/day	No	No	Yes
No	No	No	Not applicable		No	No	No	No	No	No	No	No	No	No	No	No	No	No	No	No	No		Yes		Yes		Yes			Yes	Not applicable	Yes	Yes	A4 v7.1 22-Jan-2016	04_019	04	Early Termination	50	Female		200	Placebo	<250 mg/day	No	No	<250 mg/day	No	No	Yes
No	No	No	Not applicable		No	No	No	No	No	No	No	No	No	No	No	No	No	No	No	No	No		Yes		Yes		Yes			Yes	Yes	Yes	Yes	A4 v7.1 22-Jan-2016	04_020	04	Entered	44	Male	28JUL16	196	MF4637	<250 mg/day	Yes	No	<250 mg/day	No	Yes	Yes
No	No	No	Not applicable		No	No	No	No	No	No	No	No	No	No	No	No	No	No	No	No	No		Yes		Yes		Yes			Yes	Not applicable	No	No	A4 v7.1 22-Jan-2016	04_021	04	Screen Failure	50	Male							<250 mg/day	Yes	No	No
No	No	No	No		No	No	No	No	No	No	No	No	No	No	No	No	No	No	No	No	No		Yes		Yes		Yes			Yes	Not applicable	Yes	Yes	A4 v7.1 22-Jan-2016	04_022	04	Entered	44	Female	28JUL16	199	Placebo	>=250 mg/day	No	No	>=250 mg/day	No	Yes	Yes
No	No	No	Not applicable		No	No	No	No	No	No	No	No	No	No	No	No	No	No	No	No	No		Yes		Yes		Yes			Yes	Not applicable	Yes	Yes	A4 v7.1 22-Jan-2016	04_023	04	Entered	56	Male	17AUG16	202	MF4637	>=250 mg/day	No	No	>=250 mg/day	No	Yes	Yes
No	No	No	Not applicable		No	No	No	No	No	No	No	No	No	No	No	No	No	No	No	No	No		Yes		Yes		Yes			Yes	Not applicable	No	No	A4 v7.1 22-Jan-2016	04_024	04	Screen Failure	55	Female							<250 mg/day	Yes	No	No
No	No	No	Not applicable		No	No	No	No	No	No	No	No	No	No	No	No	No	No	No	No	No		Yes		Yes		Yes			Yes	Not applicable	Yes	Yes	A4 v7.1 22-Jan-2016	04_025	04	Entered	49	Male	25AUG16	203	MF4637	<250 mg/day	No	No	<250 mg/day	No	Yes	Yes
No	No	No	Not applicable		No	No	No	No	No	No	No	No	No	No	No	No	No	No	No	No	No		Yes		Yes		Yes			Yes	Not applicable	No	No	A4 v7.1 22-Jan-2016	04_026	04	Screen Failure	36	Male							>=250 mg/day	Yes	No	No
No	No	No	Not applicable		No	No	No	No	No	No	No	No	No	No	No	No	No	No	No	No	No		Yes		Yes		Yes			Yes	Not applicable	Yes	Yes	A4 v7.1 22-Jan-2016	04_027	04	Early Termination	39	Female		201	Placebo	>=250 mg/day	No	No	>=250 mg/day	No	No	Yes
No	No	No	Not applicable		No	No	Yes	No	No	No	No	No	No	No	No	No	No	No	No	No	No		Yes		Yes		Yes			Yes	Not applicable	Yes	No	A4 v7.1 22-Jan-2016	04_028	04	Screen Failure	42	Male								Yes	No	No
No	No	No	Not applicable		No	No	No	No	No	No	No	No	No	No	Yes	No	No	No	No	No	No		Yes		Yes		Yes			Yes	Not applicable	Yes	No	A4 v7.1 22-Jan-2016	04_029	04	Screen Failure	67	Female								Yes	No	No
No	No	No	Not applicable		No	No	No	No	No	No	No	No	No	No	No	No	No	No	No	No	No		Yes		Yes		Yes			Yes	Not applicable	Yes	Yes	A4 v7.1 22-Jan-2016	04_030	04	Entered	67	Female	15SEP16	216	MF4637	>=250 mg/day	Yes	No	>=250 mg/day	No	Yes	Yes
No	No	No	No		No	No	No	No	No	No	No	No	No	No	No	No	No	No	No	No	No		Yes		Yes		Yes			Yes	Yes	Yes	Yes	A4 v7.1 22-Jan-2016	04_031	04	Entered	56	Male	22SEP16	217	Placebo	<250 mg/day	Yes	No	<250 mg/day	No	Yes	Yes
No	No	No	No		No	No	No	No	No	No	No	No	No	No	No	No	No	No	No	No	No		Yes		Yes		Yes			Yes	Not applicable	Yes	Yes	A4 v7.1 22-Jan-2016	04_032	04	Early Termination	53	Female	22SEP16	218	MF4637	<250 mg/day	No	No	<250 mg/day	No	Yes	Yes
No	No	No	No		No	No	No	No	No	No	No	No	No	No	No	No	No	No	No	No	No		Yes		Yes		Yes			Yes	Not applicable	No	No	A4 v7.1 22-Jan-2016	04_033	04	Screen Failure	42	Female								Yes	No	No
No	No	No	Not applicable		No	No	No	No	No	No	No	No	No	No	No	No	No	No	No	No	No		Yes		Yes		Yes			Yes	Not applicable	No	No	A4 v7.1 22-Jan-2016	04_034	04	Screen Failure	52	Male								Yes	No	No
No	No	No	Not applicable		No	No	No	No	No	No	No	No	No	No	No	No	No	No	No	No	No		Yes		Yes		Yes			Yes	Not applicable	Yes	Yes	A4 v7.1 22-Jan-2016	04_035	04	Entered	59	Female	10OCT16	219	Placebo	>=250 mg/day	No	No	>=250 mg/day	No	Yes	Yes
No	No	No	Not applicable	No		No	No	No	No	No	No	No	No	No	No	No	No	No	No	Yes	No	Yes		Yes		Yes		Yes			Yes	Yes	No	A2 v6.2 18-Aug-2015	09_001	09	Screen Failure	45	Male							>=250 mg/day	Yes	No	No
No	No	No	No	Yes		No	No	No	No	No	No	No	No	No	No	No	No	No	No	No	No	Yes		Yes		Yes		Yes			Yes	Yes	No	A2 v6.2 18-Aug-2015	09_002	09	Screen Failure	48	Male							<250 mg/day	Yes	No	No
No	No	No	Not applicable	Yes		No	No	No	No	No	No	No	No	No	No	No	No	No	No	No	No	Yes		Yes		Yes		No			Yes	Yes	No	A2 v6.2 18-Aug-2015	09_003	09	Screen Failure	53	Male							<250 mg/day	Yes	No	No
No	No	No	Not applicable		No	No	No	No	No	No	No	No	No	No	No	No	No	No	No	No	No	Yes		Yes		Yes			Yes		Yes	Yes	Yes	A3 v7 07-Dec-2015	09_004	09	Entered	48	Male	05FEB16	164	Placebo	>=250 mg/day	Yes	Yes	<250 mg/day	No	Yes	Yes
No	No	No	Not applicable		No	No	No	No	No	No	No	No	No	No	No	No	No	No	No	No	No	Yes		Yes		Yes			Yes		Yes	Yes	Yes	A3 v7 07-Dec-2015	09_005	09	Entered	53	Male	05FEB16	166	MF4637	>=250 mg/day	Yes	Yes	<250 mg/day	No	Yes	Yes
No	No	No	Not applicable		No	No	No	No	No	No	No	No	No	No	No	No	No	No	No	No	No	Yes		Yes		Yes			No		Not applicable	Yes	No	A3 v7 07-Dec-2015	09_006	09	Screen Failure	72	Male							<250 mg/day	Yes	No	No
No	No	No	No		No	No	No	No	No	No	No	No	No	No	No	No	No	No	No	No	No	Yes		Yes		Yes			No		Not applicable	Yes	No	A3 v7 07-Dec-2015	09_007	09	Screen Failure	49	Female							>=250 mg/day	Yes	No	No
No	No	No	Not applicable		No	No	No	No	No	No	No	No	No	No	No	No	No	No	No	No	No	Yes		Yes		Yes			Yes		Not applicable	Yes	Yes	A3 v7 07-Dec-2015	09_008	09	Entered	49	Male	04MAR16	165	Placebo	<250 mg/day	No	No	<250 mg/day	No	Yes	Yes
No	No	No	Not applicable		No	No	No	No	No	No	No	No	No	No	No	No	No	No	No	No	No	Yes		Yes		Yes			No		Yes	Yes	No	A3 v7 07-Dec-2015	09_009	09	Screen Failure	73	Female							>=250 mg/day	Yes	No	No
No	No	No	Not applicable		No	No	No	No	No	No	No	No	No	No	No	No	No	No	No	No	No	Yes		Yes		Yes			No		Yes	Yes	No	A3 v7 07-Dec-2015	09_010	09	Screen Failure	73	Female							>=250 mg/day	Yes	No	No
No	No	No	Not applicable		No	No	No	No	No	No	No	No	No	No	No	No	No	No	No	No	No	Yes		Yes		Yes			Yes		Not applicable	Yes	Yes	A3 v7 07-Dec-2015	09_011	09	Screen Failure	68	Female							<250 mg/day	Yes	No	No
No	No	No	Not applicable		No	No	No	No	No	No	No	No	No	No	No	No	No	No	No	No	No	Yes		Yes		Yes			No		Yes	Yes	No	A3 v7 07-Dec-2015	09_012	09	Screen Failure	73	Male							<250 mg/day	Yes	No	No
No	No	No	Not applicable		No	No	No	No	No	No	No	No	No	No	No	No	No	No	No	No	No		Yes		Yes		No			Yes	Not applicable	Yes	No	A4 v7.1 22-Jan-2016	09_013	09	Screen Failure	57	Female							<250 mg/day	Yes	No	No
No	No	No	Not applicable		No	No	No	No	No	No	No	No	No	No	No	No	No	No	No	No	No		Yes		Yes		Yes			Yes	Yes	Yes	Yes	A4 v7.1 22-Jan-2016	09_015	09	Entered	72	Male	04OCT16	167	MF4637	>=250 mg/day	Yes	No	<250 mg/day	No	Yes	Yes
No	No	No	No		No	No	No	No	No	No	No	No	No	No	No	No	No	No	No	No	No		Yes		Yes		Yes			Yes	Yes	Yes	Yes	A4 v7.1 22-Jan-2016	09_016	09	Screen Failure	74	Female							<250 mg/day	Yes	No	No
No	No	No	No		No	No	No	No	No	No	No	No	No	No	No	No	No	No	No	No	No		Yes		Yes		Yes			Yes	Yes	Yes	Yes	A4 v7.1 22-Jan-2016	09_017	09	Screen Failure	69	Female							<250 mg/day	Yes	No	No
No	No	No	No		No	No	No	No	No	No	No	No	No	No	No	No	No	No	No	No	No		Yes		Yes		Yes			Yes	Yes	Yes	Yes	A4 v7.1 22-Jan-2016	09_018	09	Entered	73	Male	14NOV16	105	Placebo	>=250 mg/day	Yes	No	>=250 mg/day	No	Yes	Yes
No	No	No	No		No	No	No	No	No	No	No	No	No	No	No	No	No	No	No	No	No		Yes		Yes		Yes			Yes	Yes	Yes	Yes	A4 v7.1 22-Jan-2016	09_019	09	Screen Failure	74	Female							<250 mg/day	Yes	No	No
No	No	No	No		No	No	No	No	No	No	No	No	No	No	No	No	No	No	No	No	No		Yes		Yes		Yes			Yes	Yes	Yes	Yes	A4 v7.1 22-Jan-2016	09_020	09	Entered	53	Female	14OCT16	169	MF4637	>=250 mg/day	Yes	No	<250 mg/day	No	Yes	Yes
No	No	No	Not applicable		No	No	No	No	No	No	No	No	No	No	No	No	No	No	No	No	No		Yes		Yes		Yes			Yes	Yes	Yes	Yes	A4 v7.1 22-Jan-2016	09_021	09	Entered	54	Male	27OCT16	104	MF4637	>=250 mg/day	No	No	<250 mg/day	No	Yes	Yes
No	No	No	No		No	No	No	No	No	No	No	No	No	No	No	No	No	No	No	No	No		Yes		Yes		Yes			Yes	Yes	Yes	Yes	A4 v7.1 22-Jan-2016	09_022	09	Screen Failure	55	Male							<250 mg/day	Yes	No	No
No	No	No	No		No	No	No	No	No	No	No	No	No	No	No	No	No	No	No	No	No		Yes		Yes		Yes			Yes	Yes	Yes	Yes	A4 v7.1 22-Jan-2016	09_023	09	Screen Failure	68	Female							<250 mg/day	Yes	No	No
No	No	No	Not applicable		No	No	No	No	No	No	No	No	No	No	No	No	No	No	No	No	No		Yes		Yes		Yes			Yes	Yes	Yes	Yes	A4 v7.1 22-Jan-2016	09_024	09	Entered	47	Male	04OCT16	168	Placebo	>=250 mg/day	Yes	No	<250 mg/day	No	Yes	Yes
No	No	No	Not applicable	No		No	No	No	No	No	No	No	No	No	No	No	No	No	No	No	No	Yes		Yes		Yes		Yes			Yes	Yes	Yes	A2 v6.2 18-Aug-2015	09_025	09	Screen Failure	70	Female							<250 mg/day	Yes	No	No
No	No	No	Not applicable		No	No	No	No	No	No	No	No	No	No	No	No	No	No	No	No	No		Yes		Yes		Yes			Yes	Yes	Yes	Yes	A4 v7.1 22-Jan-2016	09_026	09	Entered	55	Female	12DEC16	171	Placebo	>=250 mg/day	No	No	<250 mg/day	No	Yes	Yes
No	No	No	No		No	No	No	No	No	No	No	No	No	No	No	No	No	No	No	No	No		Yes		Yes		Yes			Yes	Yes	Yes	Yes	A4 v7.1 22-Jan-2016	09_027	09	Early Termination	60	Female	12DEC16	107	Placebo	>=250 mg/day	Yes	No	<250 mg/day	No	Yes	Yes
No	No	No	No		No	No	No	No	No	No	No	No	No	No	No	No	No	No	No	No	No		Yes		Yes		Yes			Yes	Yes	Yes	Yes	A4 v7.1 22-Jan-2016	09_028	09	Screen Failure	44	Female							<250 mg/day	Yes	No	No
No	No	No	No		No	No	No	No	No	No	No	No	No	No	No	No	No	No	No	No	No		Yes		Yes		Yes			Yes	Yes	Yes	Yes	A4 v7.1 22-Jan-2016	09_029	09	Early Termination	63	Female	12DEC16	106	MF4637	>=250 mg/day	Yes	No	<250 mg/day	No	Yes	Yes
No	No	No	No		No	No	No	No	No	No	No	No	No	No	No	No	No	No	No	No	No		Yes		Yes		Yes			Yes	Yes	Yes	Yes	A4 v7.1 22-Jan-2016	09_030	09	Entered	59	Female	12DEC16	170	MF4637	>=250 mg/day	No	No	<250 mg/day	No	Yes	Yes
No	No	No	Not applicable	No		No	No	No	No	No	No	No	No	No	No	No	No	No	No	No	No	Yes		Yes		Yes		No			Not applicable	Yes	No	A2 v6.2 18-Aug-2015	10_001	10	Screen Failure	31	Male							>=250 mg/day	Yes	No	No
No	No	No	Not applicable	No		No	No	No	No	No	No	No	No	No	No	No	No	No	No	No	No	Yes		Yes		Yes		No			Yes	Yes	No	A2 v6.2 18-Aug-2015	10_002	10	Screen Failure	33	Male							<250 mg/day	Yes	No	No
No	No	No	No	No		No	No	No	No	No	No	No	No	No	No	No	No	No	No	No	No	Yes		Yes		Yes		No			Yes	Yes	No	A2 v6.2 18-Aug-2015	10_003	10	Screen Failure	54	Female							<250 mg/day	Yes	No	No
No	No	No	Not applicable		No	No	No	No	No	No	No	No	No	No	No	No	No	No	No	No	No	Yes		Yes		Yes			No		Not applicable	Yes	Yes	A3 v7 07-Dec-2015	10_004	10	Entered	47	Male	01FEB16	172	MF4637	>=250 mg/day	No	No	>=250 mg/day	No	Yes	Yes
No	No	No	No		No	No	No	No	No	No	No	No	No	No	No	No	No	No	No	No	No	Yes		Yes		Yes			No		Not applicable	Yes	No	A3 v7 07-Dec-2015	10_005	10	Screen Failure	37	Female								Yes	No	No
No	No	No	Not applicable		No	No	No	No	No	No	No	No	No	No	No	No	No	No	No	No	No	Yes		Yes		Yes			Yes		Not applicable	Yes	Yes	A3 v7 07-Dec-2015	10_006	10	Entered	55	Male	25FEB16	174	Placebo	<250 mg/day	No	No	<250 mg/day	No	Yes	Yes
No	No	No	Not applicable		No	No	No	No	No	No	No	No	No	No	No	No	No	No	No	No	No	Yes		Yes		Yes			Yes		Yes	Yes	Yes	A3 v7 07-Dec-2015	10_007	10	Entered	54	Female	01MAR16	173	MF4637	<250 mg/day	No	Yes	<250 mg/day	No	Yes	Yes
No	No	No	No		No	No	No	No	No	No	No	No	No	No	No	No	No	No	No	No	No		Yes		Yes		Yes			Yes	Not applicable	No	No	A4 v7.1 22-Jan-2016	10_008	10	Screen Failure	64	Female								Yes	No	No
No	No	No	No		No	No	No	No	No	No	No	No	No	No	No	No	No	No	No	No	No		Yes		Yes		Yes			Yes	Not applicable	Yes	Yes	A4 v7.1 22-Jan-2016	10_009	10	Entered	64	Female	27JUN16	176	MF4637	<250 mg/day	No	No	<250 mg/day	No	Yes	Yes
No	No	No	Not applicable		No	No	No	No	No	No	No	No	No	No	No	No	No	No	No	No	No		Yes		Yes		Yes			Yes	Not applicable	Yes	Yes	A4 v7.1 22-Jan-2016	10_010	10	Entered	34	Male	27SEP16	175	Placebo	>=250 mg/day	No	No	>=250 mg/day	No	Yes	Yes
No	No	No	Not applicable		No	No	No	No	No	No	No	No	No	No	Yes	No	No	No	No	No	No		Yes		Yes		Yes			Yes	Not applicable	Yes	No	A4 v7.1 22-Jan-2016	10_011	10	Screen Failure	50	Male								Yes	No	No
No	No	No	Not applicable		No	No	No	No	No	No	No	No	No	No	No	No	No	No	No	No	No		Yes		Yes		Yes			Yes	Yes	Yes	Yes	A4 v7.1 22-Jan-2016	10_012	10	Entered	53	Male	12OCT16	177	Placebo	<250 mg/day	No	Yes	<250 mg/day	No	Yes	Yes
No	No	No	No		No	Yes	No	No	No	No	No	No	No	No	No	No	No	No	No	No	No		Yes		Yes		Yes			Yes	Not applicable	Yes	No	A4 v7.1 22-Jan-2016	10_013	10	Screen Failure	66	Female								Yes	No	No
Yes	No	No	Not applicable		No	No	No	No	No	No	No	No	No	No	No	No	No	No	No	No	No		Yes		Yes		Yes			Yes	Not applicable	Yes	No	A4 v7.1 22-Jan-2016	11_001	11	Screen Failure	70	Female								Yes	No	No
No	No	No	Not applicable		No	No	No	No	No	No	No	No	No	No	No	No	No	No	Yes	No	No		Yes		Yes		Yes			Yes	Yes	No	No	A4 v7.1 22-Jan-2016	11_002	11	Screen Failure	63	Female								Yes	No	No
No	No	No	Not applicable		No	No	No	No	No	No	No	No	No	No	No	No	No	No	No	No	No		Yes		Yes		Yes			Yes	Yes	Yes	Yes	A4 v7.1 22-Jan-2016	11_003	11	Early Termination	52	Male	15SEP16	142	Placebo	<250 mg/day	Yes	Yes	>=250 mg/day	No	Yes	Yes
No	No	No	No		No	No	No	No	No	No	No	No	No	No	No	No	No	No	No	No	No		Yes		Yes		Yes			Yes	Not applicable	Yes	Yes	A4 v7.1 22-Jan-2016	11_004	11	Entered	42	Female	02SEP16	140	MF4637	<250 mg/day	Yes	No	<250 mg/day	No	Yes	Yes
No	No	No	Not applicable		No	No	No	No	No	No	No	No	No	No	No	No	No	No	No	No	No		Yes		Yes		Yes			Yes	Yes	Yes	Yes	A4 v7.1 22-Jan-2016	11_005	11	Early Termination	63	Male	26SEP16	141	MF4637	>=250 mg/day	No	No	>=250 mg/day	No	Yes	Yes
No	No	No	No		No	No	No	No	No	No	No	No	No	No	No	No	No	No	No	No	No		Yes		Yes		Yes			Yes	Not applicable	Yes	Yes	A4 v7.1 22-Jan-2016	11_006	11	Entered	54	Female	29SEP16	146	Placebo	<250 mg/day	Yes	No	>=250 mg/day	No	Yes	Yes
No	No	No	No		No	No	No	No	No	No	No	No	No	Yes	No	No	No	No	No	No	No		Yes		Yes		Yes			Yes	Not applicable	Yes	No	A4 v7.1 22-Jan-2016	11_007	11	Screen Failure	48	Female							>=250 mg/day	Yes	No	No
No	No	No	No		No	No	No	No	No	No	No	No	No	No	No	No	No	No	No	No	No		Yes		Yes		Yes			Yes	Yes	Yes	Yes	A4 v7.1 22-Jan-2016	11_008	11	Entered	42	Male	27SEP16	144	MF4637	<250 mg/day	No	No	>=250 mg/day	No	Yes	Yes
No	No	No	No		No	No	No	No	No	No	No	No	No	No	No	No	No	No	No	No	No		Yes		Yes		Yes			Yes	Yes	Yes	Yes	A4 v7.1 22-Jan-2016	11_009	11	Entered	50	Female	01OCT16	147	Placebo	<250 mg/day	No	No	<250 mg/day	No	Yes	Yes
No	No	No	No		No	No	No	No	No	No	No	No	No	No	No	No	No	No	No	No	No		Yes		Yes		Yes			Yes	Yes	Yes	Yes	A4 v7.1 22-Jan-2016	11_010	11	Entered	52	Female	27SEP16	143	Placebo	<250 mg/day	No	Yes	<250 mg/day	No	Yes	Yes
No	No	No	No		No	No	No	No	No	No	No	No	No	No	No	No	No	No	No	No	No		Yes		Yes		Yes			Yes	Not applicable	Yes	Yes	A4 v7.1 22-Jan-2016	11_011	11	Entered	41	Female	19OCT16	244	Placebo	<250 mg/day	No	No	>=250 mg/day	No	Yes	Yes
No	No	No	No		No	No	No	No	No	No	No	No	No	No	No	No	No	No	No	No	No		Yes		Yes		Yes			Yes	Yes	Yes	Yes	A4 v7.1 22-Jan-2016	11_012	11	Entered	40	Female	18OCT16	145	MF4637	<250 mg/day	No	No	<250 mg/day	No	Yes	Yes
No	No	No	No		No	No	No	No	No	No	No	No	No	No	No	No	No	No	No	No	No		Yes		Yes		Yes			Yes	Not applicable	No	No	A4 v7.1 22-Jan-2016	11_013	11	Screen Failure	29	Female								Yes	No	No
No	No	No	No		No	No	No	No	No	No	No	No	No	No	No	No	No	No	No	No	No		Yes		Yes		Yes			Yes	Yes	Yes	Yes	A4 v7.1 22-Jan-2016	11_014	11	Entered	49	Female	17NOV16	247	Placebo	>=250 mg/day	No	No	>=250 mg/day	No	Yes	Yes
No	No	No	Not applicable		No	No	No	No	No	No	No	No	No	No	No	No	No	No	No	No	No		Yes		Yes		Yes			Yes	Yes	Yes	Yes	A4 v7.1 22-Jan-2016	11_015	11	Entered	62	Male	10NOV16	245	MF4637	<250 mg/day	No	No	>=250 mg/day	No	Yes	Yes
No	No	No	Not applicable		No	No	No	No	No	No	No	No	No	No	No	No	No	No	No	No	No		Yes		Yes		Yes			Yes	Yes	Yes	Yes	A4 v7.1 22-Jan-2016	11_016	11	Screen Failure	55	Female							>=250 mg/day	Yes	No	No
No	No	No	No		No	No	No	No	No	No	No	No	No	No	No	No	No	No	No	No	No		Yes		Yes		Yes			Yes	Yes	Yes	Yes	A4 v7.1 22-Jan-2016	11_017	11	Entered	32	Female	28NOV16	246	MF4637	<250 mg/day	No	No	<250 mg/day	No	Yes	Yes
No	No	No	No		No	No	No	No	No	No	No	No	No	No	No	No	No	No	No	No	No		Yes		Yes		Yes			Yes	Yes	Yes	Yes	A4 v7.1 22-Jan-2016	11_018	11	Entered	45	Female	29NOV16	248	Placebo	<250 mg/day	No	No	>=250 mg/day	No	Yes	Yes
No	No	No	Not applicable		No	No	No	No	No	No	No	No	No	No	No	No	No	No	No	No	No		Yes		Yes		Yes			Yes	Yes	Yes	Yes	A4 v7.1 22-Jan-2016	12_001	12	Entered	66	Male	14OCT16	257	MF4637	>=250 mg/day	Yes	Yes	>=250 mg/day	No	Yes	Yes
No	No	No	Not applicable		No	No	No	No	No	No	No	No	No	No	No	No	No	No	No	No	No		Yes		Yes		Yes			Yes	Yes	Yes	Yes	A4 v7.1 22-Jan-2016	12_003	12	Entered	52	Male	11OCT16	138	Placebo	>=250 mg/day	Yes	No	>=250 mg/day	No	Yes	Yes
No	No	No	Not applicable		No	No	No	No	No	No	No	No	No	No	No	No	No	No	No	No	No		Yes		Yes		Yes			Yes	Yes	Yes	Yes	A4 v7.1 22-Jan-2016	12_004	12	Entered	70	Male	22SEP16	133	Placebo	>=250 mg/day	Yes	Yes	>=250 mg/day	No	Yes	Yes
No	No	No	No		No	No	No	No	No	No	No	No	No	No	No	No	No	No	No	No	No		No		Yes		Yes			Yes	Yes	Yes	No	A4 v7.1 22-Jan-2016	12_005	12	Screen Failure	72	Female								Yes	No	No
No	No	No	No		No	No	No	No	No	No	No	No	No	No	No	No	No	No	No	No	No		Yes		Yes		Yes			Yes	Yes	Yes	Yes	A4 v7.1 22-Jan-2016	12_006	12	Entered	76	Female	22SEP16	132	MF4637	<250 mg/day	Yes	Yes	<250 mg/day	No	Yes	Yes
No	No	No	Not applicable		No	No	No	No	No	No	No	No	No	No	No	No	No	No	No	No	No		Yes		Yes		Yes			Yes	Yes	Yes	Yes	A4 v7.1 22-Jan-2016	12_007	12	Entered	64	Female	30SEP16	134	Placebo	>=250 mg/day	No	Yes	>=250 mg/day	No	Yes	Yes
No	No	No	No		No	No	No	No	No	No	No	No	No	No	No	No	No	No	No	No	No		No		Yes		Yes			Yes	Yes	Yes	No	A4 v7.1 22-Jan-2016	12_008	12	Screen Failure	68	Female								Yes	No	No
No	No	No	No		No	No	No	No	No	No	No	No	No	No	No	No	No	No	No	No	No		Yes		Yes		Yes			Yes	Yes	Yes	Yes	A4 v7.1 22-Jan-2016	12_009	12	Early Termination	53	Female	26OCT16	260	MF4637	>=250 mg/day	Yes	Yes	>=250 mg/day	No	Yes	Yes
No	No	No	Not applicable		No	No	No	No	No	No	No	No	No	No	No	No	No	No	No	No	No		No		Yes		Yes			Yes	Yes	Yes	No	A4 v7.1 22-Jan-2016	12_010	12	Screen Failure	72	Male								Yes	No	No
No	No	No	Not applicable		Yes	No	No	No	No	No	No	No	No	No	No	No	No	No	No	No	No		Yes		Yes		Yes			Yes	Yes	Yes	No	A4 v7.1 22-Jan-2016	12_011	12	Screen Failure	77	Male								Yes	No	No
No	No	No	Not applicable		No	No	No	No	No	No	No	No	No	No	No	No	No	No	No	No	No		No		Yes		Yes			Yes	Yes	Yes	No	A4 v7.1 22-Jan-2016	12_012	12	Screen Failure	51	Female								Yes	No	No
No	No	No	Not applicable		No	No	No	No	No	No	No	No	No	No	No	No	No	No	No	No	No		Yes		Yes		Yes			Yes	Yes	Yes	Yes	A4 v7.1 22-Jan-2016	12_013	12	Entered	52	Female	30SEP16	137	MF4637	>=250 mg/day	No	Yes	>=250 mg/day	No	Yes	Yes
No	No	No	Not applicable		No	No	No	No	No	No	No	No	No	No	No	No	No	No	No	No	No		Yes		Yes		Yes			Yes	Yes	Yes	Yes	A4 v7.1 22-Jan-2016	12_014	12	Entered	66	Female	30SEP16	136	Placebo	>=250 mg/day	Yes	Yes	>=250 mg/day	No	Yes	Yes
No	No	No	Not applicable		No	No	No	No	No	No	No	No	No	No	No	No	No	No	No	No	No		Yes		Yes		Yes			Yes	Yes	Yes	Yes	A4 v7.1 22-Jan-2016	12_015	12	Early Termination	47	Female	30SEP16	135	MF4637	>=250 mg/day	Yes	Yes	>=250 mg/day	No	Yes	Yes
No	No	No	No		No	No	No	No	No	No	No	No	No	No	No	No	No	No	No	No	No		Yes		Yes		Yes			Yes	Yes	Yes	Yes	A4 v7.1 22-Jan-2016	12_016	12	Entered	52	Female	05OCT16	103	MF4637	<250 mg/day	No	No	<250 mg/day	No	Yes	Yes
No	No	No	No		No	No	No	No	No	No	No	No	No	No	No	No	No	No	No	No	No		Yes		Yes		Yes			Yes	Yes	Yes	Yes	A4 v7.1 22-Jan-2016	12_017	12	Entered	57	Female	05OCT16	100	Placebo	>=250 mg/day	Yes	Yes	>=250 mg/day	No	Yes	Yes
No	No	No	Not applicable		No	No	No	No	No	No	No	No	No	No	No	No	No	No	No	No	No		No		Yes		Yes			Yes	Yes	Yes	No	A4 v7.1 22-Jan-2016	12_018	12	Screen Failure	77	Female								Yes	No	No
No	No	No	No		No	No	No	No	No	No	No	No	No	No	No	No	No	No	No	No	No		Yes		Yes		Yes			Yes	Yes	Yes	Yes	A4 v7.1 22-Jan-2016	12_019	12	Entered	53	Male	05OCT16	102	Placebo	<250 mg/day	Yes	Yes	<250 mg/day	No	Yes	Yes
No	No	No	No		No	No	No	No	No	No	No	No	No	No	No	No	No	No	No	No	No		Yes		Yes		Yes			Yes	Yes	Yes	Yes	A4 v7.1 22-Jan-2016	12_020	12	Entered	60	Female	05OCT16	101	MF4637	>=250 mg/day	Yes	Yes	>=250 mg/day	No	Yes	Yes
No	No	No	Not applicable		No	No	No	No	No	No	No	No	No	No	No	No	No	No	No	No	No		Yes		Yes		Yes			Yes	Yes	Yes	Yes	A4 v7.1 22-Jan-2016	12_021	12	Entered	54	Male	11OCT16	254	MF4637	>=250 mg/day	Yes	Yes	>=250 mg/day	No	Yes	Yes
No	No	No	Not applicable		No	No	No	No	No	No	No	No	No	No	No	No	No	No	No	No	No		Yes		Yes		Yes			Yes	Yes	Yes	Yes	A4 v7.1 22-Jan-2016	12_022	12	Entered	43	Male	12OCT16	253	Placebo	<250 mg/day	Yes	No	<250 mg/day	No	Yes	Yes
No	No	No	No		No	No	No	No	No	No	No	No	No	No	Yes	No	No	No	No	No	No		Yes		Yes		Yes			Yes	Yes	Yes	No	A4 v7.1 22-Jan-2016	12_023	12	Screen Failure	44	Female								Yes	No	No
No	No	No	No		No	No	No	No	No	No	No	No	No	No	No	No	No	No	No	No	No		Yes		Yes		Yes			Yes	Yes	Yes	Yes	A4 v7.1 22-Jan-2016	12_024	12	Early Termination	41	Female	11OCT16	139	MF4637	>=250 mg/day	Yes	No	>=250 mg/day	No	Yes	Yes
No	No	No	Not applicable		No	No	No	No	No	No	No	No	No	No	No	No	No	No	No	No	No		Yes		Yes		Yes			Yes	Yes	Yes	Yes	A4 v7.1 22-Jan-2016	12_025	12	Entered	73	Male	14OCT16	258	MF4637	>=250 mg/day	Yes	No	>=250 mg/day	No	Yes	Yes
No	No	No	Not applicable		No	No	No	No	No	No	No	No	No	No	No	No	No	No	No	No	No		No		Yes		Yes			Yes	Yes	Yes	No	A4 v7.1 22-Jan-2016	12_026	12	Screen Failure	62	Male								Yes	No	No
No	No	No	No		No	No	No	No	No	No	No	No	No	No	No	No	No	No	No	No	No		Yes		Yes		Yes			Yes	Yes	Yes	Yes	A4 v7.1 22-Jan-2016	12_027	12	Entered	56	Female	12OCT16	252	Placebo	<250 mg/day	No	Yes	<250 mg/day	No	Yes	Yes
No	No	No	No		No	No	No	No	No	No	No	No	No	No	No	No	No	No	No	No	No		Yes		Yes		Yes			Yes	Yes	Yes	Yes	A4 v7.1 22-Jan-2016	12_028	12	Entered	71	Female	14OCT16	259	Placebo	<250 mg/day	Yes	Yes	<250 mg/day	No	Yes	Yes
No	No	No	Not applicable		No	No	No	No	No	No	No	No	No	No	No	No	No	No	No	No	No		Yes		Yes		Yes			Yes	Yes	Yes	Yes	A4 v7.1 22-Jan-2016	12_029	12	Entered	72	Male	12OCT16	256	Placebo	>=250 mg/day	Yes	Yes	>=250 mg/day	No	Yes	Yes
No	No	No	Not applicable		No	No	No	No	No	No	No	No	No	No	No	No	No	No	No	No	No		Yes		Yes		Yes			Yes	Yes	Yes	Yes	A4 v7.1 22-Jan-2016	12_030	12	Entered	56	Male	12OCT16	255	MF4637	<250 mg/day	Yes	Yes	<250 mg/day	No	Yes	Yes
No	No	No	No		No	No	No	No	No	No	No	No	No	No	No	No	No	No	No	No	No		No		Yes		Yes			Yes	Yes	Yes	No	A4 v7.1 22-Jan-2016	12_031	12	Screen Failure	54	Female								Yes	No	No
No	No	No	Not applicable		No	No	No	No	No	No	No	No	No	No	No	No	No	No	No	No	No		Yes		Yes		Yes			Yes	Yes	Yes	Yes	A4 v7.1 22-Jan-2016	12_032	12	Entered	67	Male	02NOV16	280	Placebo	>=250 mg/day	Yes	No	>=250 mg/day	No	Yes	Yes
No	No	No	Not applicable		No	No	No	No	No	No	No	No	No	No	No	No	No	No	No	No	No		Yes		Yes		Yes			Yes	Yes	Yes	Yes	A4 v7.1 22-Jan-2016	12_033	12	Entered	72	Female	02NOV16	282	MF4637	>=250 mg/day	Yes	No	>=250 mg/day	No	Yes	Yes
No	No	No	No		No	No	No	No	No	No	No	No	No	No	No	No	No	No	No	No	No		Yes		Yes		Yes			Yes	Not applicable	Yes	Yes	A4 v7.1 22-Jan-2016	12_034	12	Entered	55	Female	26OCT16	261	Placebo	>=250 mg/day	Yes	No	>=250 mg/day	No	Yes	Yes
No	No	No	No		No	No	No	No	No	No	No	No	No	No	No	No	No	No	No	No	No		No		Yes		Yes			Yes	Yes	Yes	No	A4 v7.1 22-Jan-2016	12_036	12	Screen Failure	51	Male								Yes	No	No
No	No	No	No		No	No	No	No	No	No	No	No	No	No	No	No	No	No	No	No	No		No		Yes		Yes			Yes	Yes	Yes	No	A4 v7.1 22-Jan-2016	12_037	12	Screen Failure	46	Female								Yes	No	No
No	No	No	Not applicable		No	No	No	No	No	No	No	No	No	No	No	No	No	No	No	No	No		Yes		Yes		Yes			Yes	Yes	Yes	Yes	A4 v7.1 22-Jan-2016	12_038	12	Entered	62	Male	26OCT16	263	Placebo	>=250 mg/day	Yes	Yes	>=250 mg/day	No	Yes	Yes
No	No	No	Not applicable		No	No	No	No	No	No	No	No	No	No	No	No	No	No	No	No	No		Yes		Yes		Yes			Yes	Not applicable	Yes	Yes	A4 v7.1 22-Jan-2016	12_039	12	Entered	57	Male	26OCT16	262	MF4637	<250 mg/day	No	No	<250 mg/day	No	Yes	Yes
No	No	No	Not applicable		No	No	No	No	No	No	No	No	No	No	No	No	No	No	No	No	No		Yes		Yes		Yes			Yes	Yes	Yes	Yes	A4 v7.1 22-Jan-2016	12_040	12	Entered	60	Female	10NOV16	292	MF4637	>=250 mg/day	Yes	Yes	>=250 mg/day	No	Yes	Yes
No	No	No	Not applicable		No	No	No	No	No	No	No	No	No	No	No	No	No	No	No	No	No		Yes		Yes		Yes			Yes	Yes	Yes	Yes	A4 v7.1 22-Jan-2016	12_041	12	Early Termination	54	Female	10NOV16	293	Placebo	>=250 mg/day	Yes	Yes	>=250 mg/day	No	Yes	Yes
No	No	No	Not applicable		No	No	No	No	No	No	No	No	No	No	No	No	No	No	No	No	No		Yes		Yes		Yes			Yes	Yes	Yes	No	A4 v7.1 22-Jan-2016	12_042	12	Screen Failure	62	Male								Yes	No	No
No	No	No	Not applicable		No	No	No	No	No	No	No	No	No	No	No	No	No	No	No	No	No		Yes		Yes		Yes			Yes	Yes	Yes	Yes	A4 v7.1 22-Jan-2016	12_043	12	Entered	77	Male	03NOV16	283	MF4637	>=250 mg/day	Yes	Yes	>=250 mg/day	No	Yes	Yes
No	No	No	Not applicable		No	No	No	No	No	No	No	No	No	No	No	No	No	No	No	No	No		Yes		Yes		Yes			Yes	Yes	Yes	Yes	A4 v7.1 22-Jan-2016	12_044	12	Entered	66	Male	02NOV16	281	Placebo	>=250 mg/day	Yes	Yes	>=250 mg/day	No	Yes	Yes
Yes	No	No	Not applicable		No	No	No	No	No	No	No	No	No	No	No	No	No	No	No	No	No		Yes		Yes		Yes			Yes	Yes	Yes	No	A4 v7.1 22-Jan-2016	12_045	12	Screen Failure	65	Female								Yes	No	No
No	No	No	Not applicable		No	No	No	No	No	No	No	No	No	No	No	No	No	No	No	No	No		Yes		Yes		Yes			Yes	Yes	Yes	Yes	A4 v7.1 22-Jan-2016	12_046	12	Entered	75	Male	03NOV16	284	MF4637	>=250 mg/day	Yes	Yes	>=250 mg/day	No	Yes	Yes
No	No	No	Not applicable		No	No	No	No	No	No	No	No	No	Yes	No	No	No	No	No	No	No		Yes		Yes		Yes			Yes	Yes	Yes	No	A4 v7.1 22-Jan-2016	12_047	12	Screen Failure	46	Male							<250 mg/day	Yes	No	No
No	No	No	No		No	No	No	No	No	No	No	No	No	No	No	No	No	No	No	No	No		Yes		Yes		Yes			Yes	Yes	Yes	Yes	A4 v7.1 22-Jan-2016	12_048	12	Entered	63	Female	03NOV16	285	MF4637	<250 mg/day	Yes	No	<250 mg/day	No	Yes	Yes
No	No	No	Not applicable		No	No	No	No	No	No	No	No	No	No	No	No	No	No	No	No	No		Yes		Yes		Yes			Yes	Yes	Yes	No	A4 v7.1 22-Jan-2016	12_049	12	Screen Failure	49	Male								Yes	No	No
No	No	No	Not applicable		No	No	No	No	No	No	No	No	No	No	No	No	No	No	No	No	No		No		Yes		Yes			Yes	Yes	Yes	No	A4 v7.1 22-Jan-2016	12_050	12	Screen Failure	69	Female								Yes	No	No
No	Yes	No	Not applicable		No	No	No	No	No	No	No	No	No	No	No	No	No	No	No	No	No		Yes		Yes		Yes			Yes	Yes	Yes	No	A4 v7.1 22-Jan-2016	12_051	12	Screen Failure	65	Male								Yes	No	No
No	No	No	Not applicable		No	No	No	No	No	No	No	No	No	No	No	No	No	No	No	No	No		No		Yes		Yes			Yes	Yes	Yes	No	A4 v7.1 22-Jan-2016	12_052	12	Screen Failure	51	Female								Yes	No	No
No	No	No	No		No	No	No	No	No	No	No	No	No	No	No	No	No	No	No	No	No		Yes		Yes		Yes			Yes	Yes	Yes	Yes	A4 v7.1 22-Jan-2016	12_054	12	Entered	60	Female	03NOV16	286	Placebo	>=250 mg/day	Yes	Yes	>=250 mg/day	No	Yes	Yes
No	No	No	Not applicable		No	No	No	No	No	No	No	No	No	No	No	No	No	No	No	No	No		Yes		Yes		Yes			Yes	Yes	Yes	No	A4 v7.1 22-Jan-2016	12_055	12	Screen Failure	70	Female								Yes	No	No
No	No	No	Not applicable		No	No	No	No	No	No	No	No	No	No	No	No	No	No	No	No	No		Yes		Yes		Yes			Yes	Yes	Yes	Yes	A4 v7.1 22-Jan-2016	12_056	12	Early Termination	61	Male	03NOV16	287	Placebo	<250 mg/day	Yes	Yes	<250 mg/day	No	Yes	Yes
No	No	No	Not applicable		No	No	No	No	No	No	No	No	No	No	No	No	No	No	No	No	No		Yes		Yes		Yes			Yes	Yes	Yes	Yes	A4 v7.1 22-Jan-2016	12_057	12	Entered	65	Female	10NOV16	294	Placebo	<250 mg/day	Yes	No	<250 mg/day	No	Yes	Yes
No	No	No	Not applicable		No	No	No	No	No	No	No	No	No	No	No	No	No	No	No	No	No		Yes		Yes		Yes			Yes	Yes	Yes	Yes	A4 v7.1 22-Jan-2016	12_058	12	Entered	68	Male	16NOV16	181	Placebo	<250 mg/day	Yes	Yes	<250 mg/day	No	Yes	Yes
No	No	No	Not applicable		No	No	No	No	No	No	No	No	No	No	Yes	No	No	No	No	No	No		Yes		Yes		Yes			Yes	Yes	Yes	No	A4 v7.1 22-Jan-2016	12_059	12	Screen Failure	67	Female								Yes	No	No
No	No	No	No		No	No	No	No	No	No	No	No	No	No	No	No	No	No	No	No	No		No		Yes		Yes			Yes	Yes	Yes	No	A4 v7.1 22-Jan-2016	12_060	12	Screen Failure	48	Female								Yes	No	No
No	No	No	Not applicable		No	No	No	No	No	No	No	No	No	No	No	No	No	No	No	No	No		Yes		Yes		Yes			Yes	Yes	Yes	No	A4 v7.1 22-Jan-2016	12_061	12	Screen Failure	72	Male								Yes	No	No
No	No	No	Not applicable		No	No	No	No	No	No	No	No	No	No	No	No	No	No	No	No	No		Yes		Yes		Yes			Yes	Yes	Yes	Yes	A4 v7.1 22-Jan-2016	12_062	12	Entered	53	Male	16NOV16	295	MF4637	<250 mg/day	Yes	No	<250 mg/day	No	Yes	Yes
No	No	No	No		No	No	No	No	No	No	No	No	No	No	No	No	No	No	No	No	No		Yes		Yes		Yes			Yes	Yes	Yes	No	A4 v7.1 22-Jan-2016	12_063	12	Screen Failure	71	Female								Yes	No	No
No	No	No	Not applicable		No	No	No	No	No	No	No	No	No	No	No	No	No	No	No	No	No		No		Yes		Yes			Yes	Yes	Yes	No	A4 v7.1 22-Jan-2016	12_064	12	Screen Failure	72	Female								Yes	No	No
No	No	No	Not applicable		No	No	No	No	No	No	No	No	No	No	No	No	No	No	No	No	No		Yes		Yes		Yes			Yes	Yes	Yes	Yes	A4 v7.1 22-Jan-2016	12_065	12	Entered	76	Female	16NOV16	182	MF4637	<250 mg/day	Yes	Yes	<250 mg/day	No	Yes	Yes
No	No	No	Not applicable		No	No	No	No	No	No	No	No	No	No	No	No	No	No	No	No	No		Yes		Yes		Yes			Yes	Yes	Yes	No	A4 v7.1 22-Jan-2016	12_066	12	Screen Failure	59	Male								Yes	No	No
No	No	No	Not applicable		No	No	No	No	No	No	No	No	No	No	No	No	No	No	No	No	No		Yes		Yes		Yes			Yes	Yes	Yes	Yes	A4 v7.1 22-Jan-2016	12_067	12	Entered	72	Female	16NOV16	180	MF4637	>=250 mg/day	Yes	Yes	>=250 mg/day	No	Yes	Yes
No	No	No	Not applicable		No	No	No	No	No	No	No	No	No	No	No	No	No	No	No	No	No		Yes		Yes		Yes			Yes	Yes	Yes	Yes	A4 v7.1 22-Jan-2016	12_068	12	Entered	78	Female	21NOV16	183	Placebo	>=250 mg/day	Yes	Yes	>=250 mg/day	No	Yes	Yes
No	No	No	No		No	No	No	No	No	No	No	No	No	No	No	No	No	No	No	No	No		No		Yes		Yes			Yes	Yes	Yes	No	A4 v7.1 22-Jan-2016	12_069	12	Screen Failure	82	Male								Yes	No	No
No	No	No	No		No	No	No	No	No	No	No	No	No	No	No	No	No	Yes	No	No	No		No		Yes		Yes			Yes	Yes	Yes	No	A4 v7.1 22-Jan-2016	12_070	12	Screen Failure	56	Female								Yes	No	No
No	No	No	No		No	No	No	No	No	No	No	No	No	No	No	No	No	No	No	No	No		Yes		Yes		Yes			Yes	Yes	Yes	No	A4 v7.1 22-Jan-2016	12_071	12	Screen Failure	58	Female								Yes	No	No
No	No	No	No		No	No	No	No	No	No	No	No	No	No	No	No	No	No	No	No	No		Yes		Yes		Yes			Yes	Yes	Yes	No	A4 v7.1 22-Jan-2016	12_072	12	Screen Failure	56	Female								Yes	No	No
No	No	No	No		No	No	No	No	No	No	No	No	No	No	No	No	No	No	No	No	No		Yes		Yes		Yes			Yes	Yes	Yes	No	A4 v7.1 22-Jan-2016	12_073	12	Screen Failure	60	Female								Yes	No	No
No	No	No	Not applicable		No	No	No	No	No	No	No	No	No	No	No	No	No	No	No	No	No		No		Yes		Yes			Yes	Yes	Yes	No	A4 v7.1 22-Jan-2016	12_074	12	Screen Failure	63	Female								Yes	No	No
No	No	No	No		No	No	No	No	No	No	No	No	No	No	No	No	No	No	No	No	No		Yes		Yes		Yes			Yes	Not applicable	Yes	Yes	A4 v7.1 22-Jan-2016	13_001	13	Entered	42	Female	28OCT16	162	Placebo	<250 mg/day	No	No	>=250 mg/day	No	Yes	Yes
No	No	No	No		No	No	No	No	No	No	No	No	No	No	No	No	No	No	No	No	No		Yes		Yes		Yes			Yes	Yes	Yes	Yes	A4 v7.1 22-Jan-2016	13_002	13	Entered	67	Female	20OCT16	204	MF4637	<250 mg/day	Yes	Yes	<250 mg/day	No	Yes	Yes
No	No	No	No		No	No	No	No	No	No	No	No	No	No	No	No	No	No	No	No	No		Yes		Yes		Yes			Yes	Yes	Yes	Yes	A4 v7.1 22-Jan-2016	13_003	13	Entered	65	Female	20OCT16	205	Placebo	<250 mg/day	Yes	Yes	<250 mg/day	No	Yes	Yes
No	No	No	No		No	No	No	No	No	No	No	No	No	No	No	No	No	No	No	No	No		Yes		Yes		Yes			Yes	Yes	Yes	Yes	A4 v7.1 22-Jan-2016	13_004	13	Entered	69	Female	20OCT16	206	MF4637	<250 mg/day	No	Yes	<250 mg/day	No	Yes	Yes
No	No	No	Not applicable		No	No	No	No	No	No	No	No	No	No	No	No	No	No	No	No	No		Yes		Yes		Yes			Yes	Not applicable	Yes	Yes	A4 v7.1 22-Jan-2016	13_005	13	Entered	48	Male	10NOV16	276	MF4637	<250 mg/day	No	No	<250 mg/day	No	Yes	Yes
No	No	No	Not applicable		No	No	No	No	No	No	No	No	No	No	No	No	No	No	No	No	No		Yes		Yes		Yes			Yes	Not applicable	Yes	Yes	A4 v7.1 22-Jan-2016	13_006	13	Entered	40	Male	28OCT16	160	MF4637	<250 mg/day	No	No	<250 mg/day	No	Yes	Yes
No	No	No	Not applicable		No	No	No	No	No	No	No	No	No	No	No	No	No	No	No	No	No		Yes		Yes		Yes			Yes	Not applicable	Yes	No	A4 v7.1 22-Jan-2016	13_007	13	Screen Failure	57	Female								Yes	No	No
No	No	No	Not applicable		No	No	No	No	No	No	No	No	No	No	No	No	No	No	No	No	No		Yes		Yes		Yes			Yes	Not applicable	Yes	No	A4 v7.1 22-Jan-2016	13_008	13	Screen Failure	67	Male								Yes	No	No
No	No	No	Not applicable		No	No	No	No	No	No	No	No	No	No	No	No	No	No	No	No	No		Yes		Yes		Yes			Yes	Yes	Yes	Yes	A4 v7.1 22-Jan-2016	13_009	13	Entered	51	Male	05NOV16	267	Placebo	<250 mg/day	No	Yes	>=250 mg/day	No	Yes	Yes
No	No	No	Not applicable		No	No	No	No	No	No	No	No	No	Yes	No	No	No	No	No	No	No		Yes		Yes		Yes			Yes	Not applicable	Yes	No	A4 v7.1 22-Jan-2016	13_010	13	Screen Failure	59	Female								Yes	No	No
No	No	No	No		No	No	No	No	No	No	No	No	No	No	No	No	No	No	No	No	No		Yes		Yes		Yes			Yes	Not applicable	Yes	Yes	A4 v7.1 22-Jan-2016	13_011	13	Entered	43	Male	28OCT16	207	Placebo	<250 mg/day	No	No	<250 mg/day	No	Yes	Yes
No	No	No	No		No	No	No	No	No	No	No	No	No	No	No	No	No	No	No	No	No		No		Yes		Yes			Yes	Not applicable	Yes	No	A4 v7.1 22-Jan-2016	13_012	13	Screen Failure	43	Male							<250 mg/day	Yes	No	No
No	No	No	No		No	No	No	No	No	No	No	No	No	No	No	No	No	No	No	No	No		Yes		Yes		Yes			Yes	Not applicable	Yes	Yes	A4 v7.1 22-Jan-2016	13_013	13	Entered	46	Male	28OCT16	161	MF4637	<250 mg/day	No	No	>=250 mg/day	No	Yes	Yes
No	No	No	Not applicable		No	No	No	No	No	No	No	No	No	No	No	No	No	No	No	No	No		Yes		Yes		Yes			Yes	Not applicable	Yes	Yes	A4 v7.1 22-Jan-2016	13_014	13	Entered	71	Female	03NOV16	266	Placebo	<250 mg/day	No	Yes	<250 mg/day	No	Yes	Yes
No	No	No	Not applicable		No	No	No	No	No	No	No	No	No	No	No	No	No	No	No	No	No		Yes		Yes		Yes			Yes	Yes	Yes	Yes	A4 v7.1 22-Jan-2016	13_015	13	Entered	75	Male	03NOV16	264	MF4637	<250 mg/day	No	Yes	<250 mg/day	No	Yes	Yes
No	No	No	No		No	No	No	No	No	No	No	No	No	No	No	No	No	No	No	No	No		Yes		Yes		Yes			Yes	Yes	Yes	Yes	A4 v7.1 22-Jan-2016	13_016	13	Entered	70	Female	28OCT16	163	Placebo	<250 mg/day	No	Yes	>=250 mg/day	No	Yes	Yes
No	No	No	No		No	No	No	No	No	No	No	No	No	No	No	No	No	No	No	No	No		Yes		Yes		Yes			Yes	Yes	Yes	Yes	A4 v7.1 22-Jan-2016	13_017	13	Entered	52	Female	03NOV16	265	MF4637	<250 mg/day	Yes	Yes	>=250 mg/day	No	Yes	Yes
No	No	No	Not applicable		No	No	No	No	No	No	No	No	No	No	No	No	No	No	No	No	No		Yes		Yes		No			Yes	Yes	Yes	No	A4 v7.1 22-Jan-2016	13_018	13	Screen Failure	50	Female								Yes	No	No
No	No	No	No		No	No	No	No	No	No	No	No	No	No	No	No	No	No	No	No	No		Yes		Yes		Yes			Yes	Yes	Yes	Yes	A4 v7.1 22-Jan-2016	13_019	13	Entered	47	Female	23NOV16	278	Placebo	<250 mg/day	No	No	<250 mg/day	No	Yes	Yes
No	No	No	Not applicable		No	No	No	No	No	No	No	No	No	No	No	No	No	No	No	No	No		Yes		Yes		Yes			Yes	Not applicable	Yes	Yes	A4 v7.1 22-Jan-2016	13_020	13	Entered	55	Male	17NOV16	277	Placebo	<250 mg/day	No	No	<250 mg/day	No	Yes	Yes
No	No	No	Not applicable		No	No	No	No	No	No	No	No	No	No	No	No	No	No	No	No	No		Yes		Yes		Yes			Yes	Yes	Yes	Yes	A4 v7.1 22-Jan-2016	14_001	14	Entered	61	Male	25OCT16	185	Placebo	>=250 mg/day	No	Yes	>=250 mg/day	No	Yes	Yes
No	No	No	No		No	No	No	No	No	No	No	No	No	No	No	No	No	No	No	No	No		Yes		Yes		Yes			Yes	Yes	Yes	Yes	A4 v7.1 22-Jan-2016	14_002	14	Entered	44	Female	12OCT16	208	MF4637	<250 mg/day	No	Yes	>=250 mg/day	No	Yes	Yes
No	No	No	Not applicable		No	No	No	No	No	No	No	No	No	No	No	No	No	No	No	No	No		No		Yes		Yes			Yes	Yes	Yes	No	A4 v7.1 22-Jan-2016	14_003	14	Screen Failure	36	Female								Yes	No	No
No	No	No	No		No	No	No	No	No	No	No	No	No	No	No	No	No	No	No	No	No		Yes		Yes		No			Yes	Yes	Yes	No	A4 v7.1 22-Jan-2016	14_004	14	Screen Failure	32	Female								Yes	No	No
No	No	No	Not applicable		No	No	No	No	No	No	No	No	No	No	No	No	No	No	No	No	No		Yes		Yes		Yes			Yes	No	Yes	No	A4 v7.1 22-Jan-2016	14_005	14	Screen Failure	28	Male								Yes	No	No
No	No	No	No		No	No	No	No	No	Yes	No	No	No	No	No	No	No	No	No	No	No		Yes		Yes		Yes			Yes	Not applicable	Yes	No	A4 v7.1 22-Jan-2016	14_006	14	Screen Failure	33	Female							>=250 mg/day	Yes	No	No
No	No	No	No		No	No	No	No	No	No	No	No	No	No	No	No	No	No	No	No	No		Yes		Yes		Yes			Yes	No	Yes	No	A4 v7.1 22-Jan-2016	14_007	14	Screen Failure	55	Female								Yes	No	No
	Yes	Yes			Yes																Yes		Yes										No	A4 v7.1 22-Jan-2016	14_008	14	Screen Failure	56	Male								Yes	No	No
																							No										No	A4 v7.1 22-Jan-2016	14_009	14	Screen Failure	69	Male								Yes	No	No
No	No	No	No		No	No	No	No	No	No	No	No	No	No	No	No	No	No	No	No	No		Yes		Yes		Yes			Yes	Yes	Yes	Yes	A4 v7.1 22-Jan-2016	14_010	14	Early Termination	61	Female		184	MF4637	<250 mg/day	No	No	>=250 mg/day	No	No	Yes
																																	No	A4 v7.1 22-Jan-2016	14_011	14	Screen Failure	66	Female								Yes	No	No
No	No	No	Not applicable		No	No	No	No	No	No	No	No	No	No	No	No	No	No	No	No	No		Yes		Yes		Yes			Yes	Yes	Yes	Yes	A4 v7.1 22-Jan-2016	14_012	14	Early Termination	34	Male	15NOV16	186	Placebo	<250 mg/day	No	No	>=250 mg/day	No	Yes	Yes
No	No	No	Not applicable		No	No	No	No	No	No	No	No	No	No	No	No	No	Yes	No	No	No		Yes		Yes		Yes			Yes	Yes	Yes	No	A4 v7.1 22-Jan-2016	14_013	14	Screen Failure	70	Female								Yes	No	No
No	No	No	No		No	No	No	No	No	No	No	No	No	No	No	No	No	No	No	No	No		Yes		Yes		Yes			Yes	Yes	Yes	Yes	A4 v7.1 22-Jan-2016	14_014	14	Entered	33	Female	16NOV16	187	MF4637	<250 mg/day	No	No	>=250 mg/day	No	Yes	Yes
No	No	No	Not applicable		No	No	No	No	No	No	No	No	No	No	No	No	No	Yes	No	No	No		Yes		Yes		Yes			Yes	Not applicable	Yes	No	A4 v7.1 22-Jan-2016	14_015	14	Screen Failure	57	Female								Yes	No	No
No	No	No	No		No	No	No	No	No	No	No	No	No	No	No	No	No	No	No	No	No		Yes		Yes		Yes			Yes	Not applicable	Yes	Yes	A4 v7.1 22-Jan-2016	14_016	14	Entered	51	Female	01DEC16	209	Placebo	<250 mg/day	No	No	<250 mg/day	No	Yes	Yes
																																No	No	A4 v7.1 22-Jan-2016	14_017	14	Screen Failure	53	Female								Yes	No	No
No	No	No	No		No	No	No	No	No	No	No	No	No	No	No	No	No	No	No	No	No		Yes		Yes		Yes			Yes	Not applicable	Yes	Yes	A4 v7.1 22-Jan-2016	14_018	14	Entered	25	Female	05DEC16	210	MF4637	>=250 mg/day	No	No	>=250 mg/day	No	Yes	Yes
No	No	No	No		No	No	No	No	No	No	No	No	No	No	No	No	No	No	No	No	No		Yes		Yes		Yes			Yes	Yes	Yes	Yes	A4 v7.1 22-Jan-2016	14_019	14	Entered	32	Male	03DEC16	211	Placebo	<250 mg/day	No	Yes	<250 mg/day	No	Yes	Yes
No	No	No	Not applicable		No	No	No	No	No	No	No	No	No	No	Yes	No	No	No	No	No	No		Yes		Yes		Yes			Yes	Not applicable	Yes	No	A4 v7.1 22-Jan-2016	14_020	14	Screen Failure	53	Male								Yes	No	No
No	No	No	Not applicable		No	No	No	No	No	No	No	No	No	No	No	No	No	No	No	No	No		Yes		Yes		Yes			Yes	Not applicable	Yes	Yes	A4 v7.1 22-Jan-2016	14_022	14	Screen Failure	54	Female								Yes	No	No
No	No	No	Not applicable		No	No	No	No	No	No	No	No	No	No	No	No	No	No	No	No	No		No		Yes		Yes			Yes	Not applicable	Yes	No	A4 v7.1 22-Jan-2016	15_001	15	Screen Failure	45	Male							>=250 mg/day	Yes	No	No
No	No	No	Not applicable		No	No	No	No	No	No	No	No	No	No	No	No	No	No	No	No	No		Yes		Yes		Yes			Yes	Not applicable	Yes	Yes	A4 v7.1 22-Jan-2016	15_002	15	Entered	67	Male	27SEP16	149	Placebo	<250 mg/day	No	No	<250 mg/day	No	Yes	Yes
No	No	No	Not applicable		No	No	No	No	No	No	No	No	No	No	No	No	No	No	No	No	No		No		Yes		Yes			Yes	Not applicable	Yes	No	A4 v7.1 22-Jan-2016	15_003	15	Screen Failure	20	Male							>=250 mg/day	Yes	No	No
No	No	No	Not applicable		No	No	No	No	No	No	No	No	No	Yes	No	No	No	No	No	No	No		Yes		Yes		Yes			Yes	Not applicable	Yes	No	A4 v7.1 22-Jan-2016	15_004	15	Screen Failure	72	Male							<250 mg/day	Yes	No	No
No	No	No	Not applicable		No	No	No	No	No	No	No	No	No	No	No	No	No	No	No	No	No		Yes		Yes		Yes			Yes	Not applicable	Yes	Yes	A4 v7.1 22-Jan-2016	15_005	15	Entered	58	Male	28SEP16	150	Placebo	<250 mg/day	No	No	>=250 mg/day	No	Yes	Yes
No	No	No	Not applicable		No	No	No	No	No	No	No	No	No	No	No	No	No	No	No	No	No		Yes		Yes		Yes			Yes	Not applicable	Yes	Yes	A4 v7.1 22-Jan-2016	15_006	15	Entered	69	Male	27SEP16	148	MF4637	<250 mg/day	No	No	>=250 mg/day	No	Yes	Yes
No	No	No	Not applicable		No	No	No	No	No	No	No	No	No	No	No	No	No	No	No	No	No		Yes		Yes		Yes			Yes	Not applicable	Yes	Yes	A4 v7.1 22-Jan-2016	15_007	15	Entered	74	Male	29SEP16	236	Placebo	<250 mg/day	No	No	>=250 mg/day	No	Yes	Yes
No	No	No	Not applicable		No	No	No	No	No	No	No	No	No	No	No	No	No	No	No	No	No		Yes		Yes		Yes			Yes	Not applicable	Yes	Yes	A4 v7.1 22-Jan-2016	15_008	15	Entered	55	Male	28SEP16	151	MF4637	<250 mg/day	No	No	<250 mg/day	No	Yes	Yes
No	No	No	Not applicable		No	No	No	No	No	No	No	No	No	No	No	No	No	No	No	No	No		Yes		Yes		Yes			Yes	Not applicable	Yes	Yes	A4 v7.1 22-Jan-2016	15_009	15	Entered	70	Female	10OCT16	237	MF4637	<250 mg/day	No	No	<250 mg/day	No	Yes	Yes
No	No	No	No		No	No	No	No	No	No	No	No	No	No	No	No	No	No	No	No	No		Yes		Yes		Yes			Yes	Not applicable	Yes	Yes	A4 v7.1 22-Jan-2016	15_010	15	Entered	64	Female	11OCT16	238	Placebo	<250 mg/day	No	No	<250 mg/day	No	Yes	Yes
No	No	No	Not applicable		No	No	No	No	No	No	No	No	No	No	No	No	No	No	No	No	No		Yes		Yes		Yes			Yes	Yes	Yes	Yes	A4 v7.1 22-Jan-2016	15_011	15	Entered	66	Male	13OCT16	240	Placebo	<250 mg/day	No	No	<250 mg/day	No	Yes	Yes
No	No	No	No		No	No	No	No	No	No	No	No	No	No	No	No	No	No	No	No	No		Yes		Yes		Yes			Yes	Not applicable	Yes	Yes	A4 v7.1 22-Jan-2016	15_012	15	Entered	54	Female	19OCT16	241	Placebo	<250 mg/day	No	No	<250 mg/day	No	Yes	Yes
No	No	No	No		No	No	No	No	No	No	No	No	No	No	No	No	No	No	No	No	No		Yes		Yes		Yes			Yes	Yes	Yes	Yes	A4 v7.1 22-Jan-2016	15_013	15	Entered	58	Female	13OCT16	242	MF4637	<250 mg/day	No	No	>=250 mg/day	No	Yes	Yes
No	No	No	No		No	No	No	No	No	No	No	No	No	No	No	No	No	No	No	No	No		Yes		Yes		Yes			Yes	Not applicable	Yes	Yes	A4 v7.1 22-Jan-2016	15_014	15	Entered	55	Female	13OCT16	239	MF4637	<250 mg/day	No	No	>=250 mg/day	No	Yes	Yes
No	No	No	No		No	No	No	No	No	No	No	No	No	No	No	No	No	No	No	No	No		Yes		Yes		Yes			Yes	Yes	Yes	Yes	A4 v7.1 22-Jan-2016	15_015	15	Entered	81	Female	09NOV16	268	MF4637	<250 mg/day	No	No	<250 mg/day	No	Yes	Yes
No	No	No	No		No	No	No	No	No	No	No	No	No	No	No	No	No	No	No	No	No		Yes		Yes		Yes			Yes	Not applicable	Yes	Yes	A4 v7.1 22-Jan-2016	15_016	15	Entered	77	Female	09NOV16	243	MF4637	<250 mg/day	Yes	No	>=250 mg/day	No	Yes	Yes
No	No	No	Not applicable		No	No	No	No	No	No	No	No	No	No	No	No	No	No	No	No	No		Yes		Yes		Yes			Yes	Yes	Yes	Yes	A4 v7.1 22-Jan-2016	15_017	15	Entered	62	Male	10NOV16	270	Placebo	<250 mg/day	No	No	<250 mg/day	No	Yes	Yes
No	No	No	Not applicable		No	No	No	No	No	No	No	No	No	No	No	No	No	No	No	No	No		Yes		Yes		Yes			Yes	Not applicable	Yes	Yes	A4 v7.1 22-Jan-2016	15_018	15	Entered	57	Male	15NOV16	269	MF4637	<250 mg/day	No	No	<250 mg/day	No	Yes	Yes
No	No	No	No		No	No	No	No	No	No	No	No	No	No	No	No	No	No	No	No	No		Yes		Yes		Yes			Yes	Not applicable	Yes	Yes	A4 v7.1 22-Jan-2016	15_019	15	Entered	38	Female	17NOV16	271	Placebo	<250 mg/day	No	No	>=250 mg/day	No	Yes	Yes
No	No	No	No		No	No	No	No	No	No	No	No	No	No	No	No	No	No	No	No	No		Yes		Yes		Yes			Yes	Not applicable	Yes	Yes	A4 v7.1 22-Jan-2016	15_020	15	Early Termination	65	Female	30NOV16	272	MF4637	<250 mg/day	No	No	>=250 mg/day	No	Yes	Yes
No	No	No	Not applicable		No	No	No	No	No	No	No	No	No	No	No	No	No	No	No	No	No		Yes		Yes		Yes			Yes	Not applicable	Yes	Yes	A4 v7.1 22-Jan-2016	15_021	15	Entered	41	Male	02DEC16	273	Placebo	<250 mg/day	No	No	>=250 mg/day	No	Yes	Yes
No	No	No	Not applicable		No	No	No	No	No	No	No	No	No	No	No	No	No	No	No	No	No		Yes		Yes		Yes			Yes	Not applicable	Yes	Yes	A4 v7.1 22-Jan-2016	15_022	15	Entered	48	Male	09DEC16	274	Placebo	<250 mg/day	No	No	<250 mg/day	No	Yes	Yes
No	No	No	No		No	No	No	No	No	No	No	No	No	No	No	No	No	No	No	No	No		Yes		Yes		Yes			Yes	Yes	Yes	Yes	A4 v7.1 22-Jan-2016	15_023	15	Entered	58	Female	06DEC16	275	MF4637	<250 mg/day	No	No	>=250 mg/day	No	Yes	Yes
No	No	No	No		No	No	No	No	No	No	No	No	No	No	No	No	No	No	No	No	No		Yes		Yes		Yes			Yes	Yes	Yes	Yes	A4 v7.1 22-Jan-2016	15_024	15	Screen Failure	74	Female							<250 mg/day	Yes	No	No
No	No	No	No		No	No	No	No	No	No	No	No	No	No	No	No	No	No	No	No	No		Yes		Yes		Yes			Yes	No	Yes	No	A4 v7.1 22-Jan-2016	15_025	15	Screen Failure	69	Female								Yes	No	No
No	No	No	No		No	No	No	No	No	No	No	No	No	No	No	No	No	No	No	No	No		Yes		Yes		Yes			Yes	Not applicable	Yes	Yes	A4 v7.1 22-Jan-2016	15_026	15	Screen Failure	70	Female							>=250 mg/day	Yes	No	No
No	No	No	Not applicable		No	No	No	No	No	No	No	No	No	No	No	No	No	No	No	No	No		Yes		Yes		Yes			Yes	Not applicable	Yes	Yes	A4 v7.1 22-Jan-2016	16_001	16	Early Termination	53	Male	31OCT16	152	Placebo	<250 mg/day	No	No	<250 mg/day	No	Yes	Yes
No	No	No	Not applicable		No	No	No	No	No	No	No	No	No	No	No	No	No	No	No	No	No		Yes		Yes		Yes			Yes	Not applicable	Yes	Yes	A4 v7.1 22-Jan-2016	16_002	16	Early Termination	53	Male	03NOV16	154	MF4637	<250 mg/day	No	No	<250 mg/day	No	Yes	Yes
No	No	No	Not applicable		No	No	No	No	No	No	No	No	No	No	No	No	No	No	No	No	No		Yes		Yes		Yes			Yes	Not applicable	Yes	Yes	A4 v7.1 22-Jan-2016	16_003	16	Entered	59	Male	03NOV16	153	Placebo	>=250 mg/day	No	No	>=250 mg/day	No	Yes	Yes
No	No	No	Not applicable		No	No	No	No	No	No	No	No	No	No	No	No	No	No	No	No	No		Yes		Yes		Yes			Yes	Not applicable	No	No	A4 v7.1 22-Jan-2016	16_004	16	Screen Failure	50	Male								Yes	No	No
No	No	No	Not applicable		No	No	No	No	No	No	No	No	No	No	No	No	No	No	No	No	No		Yes		Yes		Yes			Yes	Not applicable	Yes	Yes	A4 v7.1 22-Jan-2016	16_005	16	Entered	60	Male	12NOV16	155	MF4637	<250 mg/day	No	No	<250 mg/day	No	Yes	Yes
No	No	No	Not applicable		No	No	No	No	No	No	No	No	No	No	No	No	No	No	No	No	No		Yes		Yes		Yes			Yes	Not applicable	No	No	A4 v7.1 22-Jan-2016	16_006	16	Screen Failure	57	Female								Yes	No	No
No	No	No	Not applicable		No	No	No	No	No	No	No	No	No	No	No	No	No	No	No	No	No		Yes		Yes		Yes			Yes	Not applicable	Yes	Yes	A4 v7.1 22-Jan-2016	16_007	16	Entered	57	Female	28NOV16	156	Placebo	>=250 mg/day	No	No	>=250 mg/day	No	Yes	Yes
No	No	No	No		No	No	No	No	No	No	No	No	No	No	No	No	No	No	No	No	No		Yes		Yes		Yes			Yes	Not applicable	Yes	Yes	A4 v7.1 22-Jan-2016	16_008	16	Entered	58	Female	18NOV16	158	MF4637	>=250 mg/day	No	No	>=250 mg/day	No	Yes	Yes
No	No	No	Not applicable		No	No	No	No	No	No	No	No	No	No	No	No	No	No	No	No	No		Yes		Yes		Yes			Yes	Not applicable	Yes	Yes	A4 v7.1 22-Jan-2016	17_001	17	Entered	71	Male	08NOV16	212	Placebo	<250 mg/day	No	No	<250 mg/day	No	Yes	Yes
No	No	No	Not applicable		No	No	No	No	No	No	No	No	No	No	No	No	No	No	No	No	No		Yes		Yes		Yes			Yes	Not applicable	Yes	Yes	A4 v7.1 22-Jan-2016	17_002	17	Entered	70	Female	10NOV16	192	MF4637	<250 mg/day	Yes	No	<250 mg/day	No	Yes	Yes
No	No	No	Not applicable		No	No	No	No	No	No	No	No	No	No	No	No	No	No	No	No	No		Yes		Yes		Yes			Yes	Not applicable	Yes	Yes	A4 v7.1 22-Jan-2016	17_003	17	Entered	62	Female	10NOV16	193	MF4637	>=250 mg/day	Yes	No	<250 mg/day	No	Yes	Yes
No	No	No	Not applicable		No	No	No	No	No	No	No	No	No	No	No	No	No	No	No	No	No		Yes		Yes		Yes			Yes	Not applicable	Yes	Yes	A4 v7.1 22-Jan-2016	17_004	17	Screen Failure	65	Male							<250 mg/day	Yes	No	No
No	No	No	Not applicable		No	No	No	No	No	No	No	No	No	No	No	No	No	No	No	No	No		Yes		Yes		Yes			Yes	Not applicable	Yes	Yes	A4 v7.1 22-Jan-2016	17_005	17	Entered	65	Female	16NOV16	213	MF4637	<250 mg/day	No	No	<250 mg/day	No	Yes	Yes
No	No	No	Not applicable		No	No	No	No	No	No	No	No	No	No	No	No	No	No	No	No	No		Yes		Yes		Yes			Yes	Not applicable	Yes	Yes	A4 v7.1 22-Jan-2016	17_006	17	Entered	61	Female	21NOV16	194	Placebo	<250 mg/day	No	No	<250 mg/day	No	Yes	Yes
No	No	No	Not applicable		No	No	No	No	No	No	No	No	No	No	No	No	No	No	No	No	No		Yes		Yes		Yes			Yes	Not applicable	Yes	Yes	A4 v7.1 22-Jan-2016	17_007	17	Entered	61	Male	21NOV16	214	MF4637	<250 mg/day	No	No	<250 mg/day	No	Yes	Yes
No	No	No	Not applicable		No	No	No	No	No	No	No	No	No	No	No	No	No	No	No	No	No		Yes		Yes		Yes			Yes	Not applicable	Yes	Yes	A4 v7.1 22-Jan-2016	17_008	17	Entered	67	Female	25NOV16	195	Placebo	<250 mg/day	Yes	No	<250 mg/day	No	Yes	Yes
No	No	No	Not applicable		No	No	No	No	No	No	No	No	No	No	No	No	No	No	No	No	No		Yes		Yes		Yes			Yes	Not applicable	Yes	Yes	A4 v7.1 22-Jan-2016	17_009	17	Entered	70	Male	25NOV16	215	Placebo	<250 mg/day	No	No	<250 mg/day	No	Yes	Yes
No	No	No	Not applicable		No	No	No	No	No	No	No	No	No	No	No	No	No	No	No	No	No		Yes		Yes		Yes			Yes	Not applicable	Yes	Yes	A4 v7.1 22-Jan-2016	17_010	17	Entered	68	Female	25NOV16	230	MF4637	<250 mg/day	No	No	<250 mg/day	No	Yes	Yes
No	No	No	Not applicable		No	No	No	No	No	No	No	No	No	No	No	No	No	No	No	No	No		Yes		Yes		Yes			Yes	Not applicable	Yes	Yes	A4 v7.1 22-Jan-2016	17_011	17	Screen Failure	58	Female							<250 mg/day	Yes	No	No
No	No	No	No		No	No	No	No	No	No	No	No	No	No	No	No	No	No	No	No	No		Yes		Yes		Yes			Yes	Not applicable	Yes	Yes	A4 v7.1 22-Jan-2016	18_001	18	Entered	46	Female	18OCT16	220	Placebo	<250 mg/day	No	No	<250 mg/day	No	Yes	Yes
No	No	No	No		No	No	No	No	No	No	No	No	No	No	No	No	No	No	No	No	No		Yes		Yes		Yes			Yes	Yes	Yes	Yes	A4 v7.1 22-Jan-2016	18_002	18	Entered	52	Female	24OCT16	222	MF4637	<250 mg/day	No	No	<250 mg/day	No	Yes	Yes
No	No	No	No		No	No	No	No	No	No	No	No	No	No	No	No	No	No	No	No	No		Yes		Yes		Yes			Yes	Yes	Yes	Yes	A4 v7.1 22-Jan-2016	18_003	18	Entered	55	Female	26OCT16	221	Placebo	>=250 mg/day	Yes	Yes	>=250 mg/day	No	Yes	Yes
No	No	No	Not applicable		No	No	No	No	No	No	No	No	No	No	No	No	No	No	No	No	No		Yes		Yes		Yes			Yes	Yes	Yes	Yes	A4 v7.1 22-Jan-2016	19_001	19	Entered	53	Female	28OCT16	225	Placebo	<250 mg/day	No	No	>=250 mg/day	No	Yes	Yes
No	No	No	Not applicable		No	No	No	No	No	No	No	No	No	No	No	No	No	No	No	No	No		Yes		Yes		Yes			Yes	Yes	Yes	Yes	A4 v7.1 22-Jan-2016	19_002	19	Entered	37	Male	27OCT16	224	MF4637	<250 mg/day	No	No	<250 mg/day	No	Yes	Yes
No	No	No	No		No	No	No	No	No	No	No	No	No	No	No	No	No	No	No	No	No		No		Yes		Yes			Yes	Yes	Yes	No	A4 v7.1 22-Jan-2016	19_003	19	Screen Failure	59	Female							>=250 mg/day	Yes	No	No
No	No	No	No		No	No	No	No	No	No	No	No	No	No	No	No	No	No	No	No	No		Yes		Yes		Yes			Yes	Yes	Yes	Yes	A4 v7.1 22-Jan-2016	19_004	19	Entered	53	Female	04NOV16	226	MF4637	<250 mg/day	No	No	>=250 mg/day	No	Yes	Yes
No	No	No	Not applicable		No	No	No	No	No	No	No	No	No	No	No	No	No	No	No	No	No		Yes		Yes		Yes			Yes	Not applicable	Yes	Yes	A4 v7.1 22-Jan-2016	19_005	19	Entered	51	Male	04NOV16	227	Placebo	<250 mg/day	No	No	<250 mg/day	No	Yes	Yes
No	No	No	Not applicable		No	No	No	No	No	No	No	No	No	No	No	No	No	No	No	No	No		Yes		Yes		Yes			Yes	Yes	Yes	No	A4 v7.1 22-Jan-2016	19_006	19	Screen Failure	73	Male							<250 mg/day	Yes	No	No
No	No	No	Not applicable		No	No	No	No	No	No	No	No	No	No	No	No	No	No	No	No	No		Yes		Yes		Yes			Yes	Not applicable	Yes	Yes	A4 v7.1 22-Jan-2016	19_007	19	Entered	50	Male	21NOV16	289	MF4637	<250 mg/day	No	No	>=250 mg/day	No	Yes	Yes
No	No	No	Not applicable		No	No	No	No	No	No	No	No	No	No	No	No	No	No	No	No	No		Yes		Yes		Yes			Yes	Not applicable	Yes	No	A4 v7.1 22-Jan-2016	19_008	19	Screen Failure	65	Female							>=250 mg/day	Yes	No	No
No	No	No	Not applicable		No	No	No	No	No	No	No	No	No	No	No	No	No	No	No	No	No		Yes		Yes		Yes			Yes	Not applicable	Yes	Yes	A4 v7.1 22-Jan-2016	19_009	19	Entered	49	Female	21NOV16	290	Placebo	<250 mg/day	No	No	>=250 mg/day	No	Yes	Yes
No	No	No	Not applicable		No	No	No	No	No	No	No	No	No	No	No	No	No	No	No	No	No		Yes		Yes		Yes			Yes	Not applicable	Yes	Yes	A4 v7.1 22-Jan-2016	19_010	19	Entered	33	Male	21NOV16	291	MF4637	<250 mg/day	No	No	>=250 mg/day	No	Yes	Yes
No	No	No	Not applicable		No	No	No	No	No	No	No	No	No	No	No	No	No	No	No	No	No		No		Yes		Yes			Yes	Not applicable	Yes	No	A4 v7.1 22-Jan-2016	19_011	19	Screen Failure	72	Female							>=250 mg/day	Yes	No	No
No	No	No	Not applicable		No	No	No	No	No	No	No	No	No	No	No	No	No	No	No	No	No		Yes		Yes		Yes			Yes	Yes	Yes	Yes	A4 v7.1 22-Jan-2016	19_012	19	Entered	55	Female	21NOV16	288	Placebo	<250 mg/day	Yes	No	>=250 mg/day	No	Yes	Yes
No	No	No	Not applicable		No	No	No	No	No	No	No	No	No	No	No	No	No	No	No	No	No		Yes		Yes		Yes			Yes	Yes	Yes	No	A4 v7.1 22-Jan-2016	19_013	19	Screen Failure	65	Female							>=250 mg/day	Yes	No	No
[truncated: 2 more columns]
