# Supplementary material for: Evaluation of a High Concentrate Omega-3 for Correcting the Omega-3 Fatty Acid Nutritional Deficiency in Non-alcoholic Fatty Liver Disease and effects on Hepatic Steatosis (CONDIN)
Source: Preprints.org preprint supplement (doi:10.20944/preprints201807.0240.v1), 2018-07-13
Supplement: Supplementary file 10 [file LB.xlsx]

## Sheet: LB
VISIT	SUBJID	LBDAT	LBTIM	LBTESTCD	LBTEST	LBCAT	LBORRES	LBORRESU	LBORNRLO	LBORNRHI	LBSTRESC	LBSTRESN	LBSTRESU	LBSTNRLO	LBSTNRHI	LBSTNRC	LBNRIND	LBSTAT	LBREASND	LBSPCCND	LBFAST	LBCOMM	VISITNUM	CS_COMM	CS_SIG	B_LBRESN	B_LBFLAG	D_LBRESN	SITE	STATUS	AGE	SEX	FIRSTDT	RANDNO	TREAT	OMEGA	DIABETE	STATIN	OMEGA_C	SFFL	SAFETY	ITT	MITT	PP
Screening	02_001	01OCT15	9:31:00	ALP	Alkaline Phosphatase	Liver Function Tests	52	IU/L	32	92		52	IU/L	32	92		Normal				N		Screening			64	Normal		02	Entered	57	Female	27OCT15	108	MF4637	<250 mg/day	Yes	Yes	<250 mg/day	No	Yes	Yes	Yes	Yes
Screening	02_001	01OCT15	9:31:00	ALT	ALT	Liver Function Tests	39	IU/L	14	54		39	IU/L	14	54		Normal				N		Screening			31	Normal		02	Entered	57	Female	27OCT15	108	MF4637	<250 mg/day	Yes	Yes	<250 mg/day	No	Yes	Yes	Yes	Yes
Screening	02_001	01OCT15	9:31:00	AST	AST	Liver Function Tests	25	IU/L	15	41		25	IU/L	15	41		Normal				N		Screening			21	Normal		02	Entered	57	Female	27OCT15	108	MF4637	<250 mg/day	Yes	Yes	<250 mg/day	No	Yes	Yes	Yes	Yes
Screening	02_001	01OCT15	9:31:00	BILIT	Bilirubin Total	Liver Function Tests	0.4	mg/dL	0.3	1.2		0.4	mg/dL	0.3	1.2		Normal				N		Screening			0.2	Low		02	Entered	57	Female	27OCT15	108	MF4637	<250 mg/day	Yes	Yes	<250 mg/day	No	Yes	Yes	Yes	Yes
Screening	02_001	01OCT15	9:31:00	GGT	GGT	Liver Function Tests	52	IU/L	7	50		52	IU/L	7	50		High				N		Screening			55	High		02	Entered	57	Female	27OCT15	108	MF4637	<250 mg/day	Yes	Yes	<250 mg/day	No	Yes	Yes	Yes	Yes
Screening	02_001	13OCT15	9:00:00	HBA1C	HbA1c	HbA1c	6.9	%	4	5.6		6.9	%	4	5.6		High				N	INTERPRETIVE INFORMATION: Hemoglobin A1cHemoglobin A1c values of 5.7-6.4 percent indicate an increasedrisk for developing diabetes mellitus. Hemoglobin A1c valuesgreater than or equal to 6.5 percent are diagnostic of diabetesmellitus. Diagnosis should be confirmed by repeating the Hb A1ctest.This boronate affinity Hb A1c method provides accurate analyticalresults in the presence of nearly all hem…	Screening			6.9	High		02	Entered	57	Female	27OCT15	108	MF4637	<250 mg/day	Yes	Yes	<250 mg/day	No	Yes	Yes	Yes	Yes
Screening	02_001	01OCT15	9:31:00	HCAB	Hepatitis C Antibody	Hepatitis C Antibody	NONREACT				NONREACT					NONREACT					N		Screening						02	Entered	57	Female	27OCT15	108	MF4637	<250 mg/day	Yes	Yes	<250 mg/day	No	Yes	Yes	Yes	Yes
Screening	02_001	01OCT15	9:31:00	TSH	TSH	TSH	1.54	uIU/mL	0.34	5.6		1.54	uIU/mL	0.34	5.6		Normal				N		Screening			1.54	Normal		02	Entered	57	Female	27OCT15	108	MF4637	<250 mg/day	Yes	Yes	<250 mg/day	No	Yes	Yes	Yes	Yes
Baseline	02_001	27OCT15	9:10:00	ALB	Albumin	Chemistry	4.3	g/dL	3.5	5.2		4.3	g/dL	3.5	5.2		Normal				Y		Baseline			4.3	Normal		02	Entered	57	Female	27OCT15	108	MF4637	<250 mg/day	Yes	Yes	<250 mg/day	No	Yes	Yes	Yes	Yes
Baseline	02_001	27OCT15	9:10:00	ALP	Alkaline Phosphatase	Liver Function Tests	64	IU/L	32	92		64	IU/L	32	92		Normal				Y		Baseline			64	Normal		02	Entered	57	Female	27OCT15	108	MF4637	<250 mg/day	Yes	Yes	<250 mg/day	No	Yes	Yes	Yes	Yes
Baseline	02_001	27OCT15	9:10:00	ALT	ALT	Liver Function Tests	31	IU/L	14	54		31	IU/L	14	54		Normal				Y		Baseline			31	Normal		02	Entered	57	Female	27OCT15	108	MF4637	<250 mg/day	Yes	Yes	<250 mg/day	No	Yes	Yes	Yes	Yes
Baseline	02_001	27OCT15	9:10:00	AST	AST	Liver Function Tests	21	IU/L	15	41		21	IU/L	15	41		Normal				Y		Baseline			21	Normal		02	Entered	57	Female	27OCT15	108	MF4637	<250 mg/day	Yes	Yes	<250 mg/day	No	Yes	Yes	Yes	Yes
Baseline	02_001	27OCT15	9:10:00	BASO	Abs Basophils	Hematology	0.1	K/uL	0	0.2		0.1	K/uL	0	0.2		Normal				Y		Baseline			0.1	Normal		02	Entered	57	Female	27OCT15	108	MF4637	<250 mg/day	Yes	Yes	<250 mg/day	No	Yes	Yes	Yes	Yes
Baseline	02_001	27OCT15	9:10:00	BASOLE	Basophils	Hematology	1	%	0	2		1	%	0	2		Normal				Y		Baseline			1	Normal		02	Entered	57	Female	27OCT15	108	MF4637	<250 mg/day	Yes	Yes	<250 mg/day	No	Yes	Yes	Yes	Yes
Baseline	02_001	27OCT15	9:10:00	BICARB	BiCarbonate (CO2)	Chemistry	26	mmol/L	22	32		26	mmol/L	22	32		Normal				Y		Baseline			26	Normal		02	Entered	57	Female	27OCT15	108	MF4637	<250 mg/day	Yes	Yes	<250 mg/day	No	Yes	Yes	Yes	Yes
Baseline	02_001	27OCT15	9:10:00	BILIT	Bilirubin Total	Liver Function Tests	0.2	mg/dL	0.3	1.2		0.2	mg/dL	0.3	1.2		Low				Y		Baseline			0.2	Low		02	Entered	57	Female	27OCT15	108	MF4637	<250 mg/day	Yes	Yes	<250 mg/day	No	Yes	Yes	Yes	Yes
Baseline	02_001	27OCT15	9:10:00	BUN	BUN (urea)	Chemistry	19	mg/dL	6	20		19	mg/dL	6	20		Normal				Y		Baseline			19	Normal		02	Entered	57	Female	27OCT15	108	MF4637	<250 mg/day	Yes	Yes	<250 mg/day	No	Yes	Yes	Yes	Yes
Baseline	02_001	27OCT15	9:10:00	CA	Calcium	Chemistry	10.0	mg/dL	8.6	10		10	mg/dL	8.6	10		Normal				Y		Baseline			10	Normal		02	Entered	57	Female	27OCT15	108	MF4637	<250 mg/day	Yes	Yes	<250 mg/day	No	Yes	Yes	Yes	Yes
Baseline	02_001	27OCT15	9:10:00	CL	Chloride	Chemistry	102	mmol/L	98	107		102	mmol/L	98	107		Normal				Y		Baseline			102	Normal		02	Entered	57	Female	27OCT15	108	MF4637	<250 mg/day	Yes	Yes	<250 mg/day	No	Yes	Yes	Yes	Yes
Baseline	02_001	27OCT15	9:10:00	CREAT	Creatinine	Chemistry	0.8	mg/dL	0.6	1.1		0.8	mg/dL	0.6	1.1		Normal				Y		Baseline			0.8	Normal		02	Entered	57	Female	27OCT15	108	MF4637	<250 mg/day	Yes	Yes	<250 mg/day	No	Yes	Yes	Yes	Yes
Baseline	02_001	27OCT15	9:10:00	CRPHS	hs-CRP	hs-CRP	3.86	mg/L				3.86	mg/L				Normal				Y	hs-CRP CHD risk level: low risk <1.0 mg/L intermediate risk 1.0-3.0 mg/L high risk >3.0 mg/L Values >10 mg/L suggests an inflammatory disorder requiring separate evaluation. Cardiac risk assessment is not appropriate in this context.	Baseline			3.86	Normal		02	Entered	57	Female	27OCT15	108	MF4637	<250 mg/day	Yes	Yes	<250 mg/day	No	Yes	Yes	Yes	Yes
Baseline	02_001	27OCT15	9:10:00	EOS	Abs Eosinophils	Hematology	0.3	K/uL	0	0.6		0.3	K/uL	0	0.6		Normal				Y		Baseline			0.3	Normal		02	Entered	57	Female	27OCT15	108	MF4637	<250 mg/day	Yes	Yes	<250 mg/day	No	Yes	Yes	Yes	Yes
Baseline	02_001	27OCT15	9:10:00	EOSLE	Eosinophils	Hematology	4	%	0	4		4	%	0	4		Normal				Y		Baseline			4	Normal		02	Entered	57	Female	27OCT15	108	MF4637	<250 mg/day	Yes	Yes	<250 mg/day	No	Yes	Yes	Yes	Yes
Baseline	02_001	27OCT15	9:10:00	GGT	GGT	Liver Function Tests	55	IU/L	7	50		55	IU/L	7	50		High				Y		Baseline			55	High		02	Entered	57	Female	27OCT15	108	MF4637	<250 mg/day	Yes	Yes	<250 mg/day	No	Yes	Yes	Yes	Yes
Baseline	02_001	27OCT15	9:10:00	GLUCF	Glucose Fasting	Chemistry	132	mg/dL	70	99		132	mg/dL	70	99		High				Y		Baseline			132	High		02	Entered	57	Female	27OCT15	108	MF4637	<250 mg/day	Yes	Yes	<250 mg/day	No	Yes	Yes	Yes	Yes
Baseline	02_001	27OCT15	9:10:00	HCT	Hematocrit	Hematology	43.5	%	36	46		43.5	%	36	46		Normal				Y		Baseline			43.5	Normal		02	Entered	57	Female	27OCT15	108	MF4637	<250 mg/day	Yes	Yes	<250 mg/day	No	Yes	Yes	Yes	Yes
Baseline	02_001	27OCT15	9:10:00	HGB	Hemoglobin	Hematology	13.3	g/dL	12	15.5		13.3	g/dL	12	15.5		Normal				Y		Baseline			13.3	Normal		02	Entered	57	Female	27OCT15	108	MF4637	<250 mg/day	Yes	Yes	<250 mg/day	No	Yes	Yes	Yes	Yes
Baseline	02_001	27OCT15	9:10:00	INSULIN	Insulin	Insulin	33.7	uIU/mL	1.9	23		33.7	uIU/mL	1.9	23		High				Y		Baseline			33.7	High		02	Entered	57	Female	27OCT15	108	MF4637	<250 mg/day	Yes	Yes	<250 mg/day	No	Yes	Yes	Yes	Yes
Baseline	02_001	27OCT15	9:10:00	K	Potassium	Chemistry	3.8	mmol/L	3.5	5.1		3.8	mmol/L	3.5	5.1		Normal				Y		Baseline			3.8	Normal		02	Entered	57	Female	27OCT15	108	MF4637	<250 mg/day	Yes	Yes	<250 mg/day	No	Yes	Yes	Yes	Yes
Baseline	02_001	27OCT15	9:10:00	LYM	Abs Lymphocytes	Hematology	2.6	K/uL	0.8	4		2.6	K/uL	0.8	4		Normal				Y		Baseline			2.6	Normal		02	Entered	57	Female	27OCT15	108	MF4637	<250 mg/day	Yes	Yes	<250 mg/day	No	Yes	Yes	Yes	Yes
Baseline	02_001	27OCT15	9:10:00	LYMLE	Lymphocytes	Hematology	34	%	20	50		34	%	20	50		Normal				Y		Baseline			34	Normal		02	Entered	57	Female	27OCT15	108	MF4637	<250 mg/day	Yes	Yes	<250 mg/day	No	Yes	Yes	Yes	Yes
Baseline	02_001	27OCT15	9:10:00	MONO	Abs Monocytes	Hematology	0.5	K/uL	0	0.9		0.5	K/uL	0	0.9		Normal				Y		Baseline			0.5	Normal		02	Entered	57	Female	27OCT15	108	MF4637	<250 mg/day	Yes	Yes	<250 mg/day	No	Yes	Yes	Yes	Yes
Baseline	02_001	27OCT15	9:10:00	MONOLE	Monocytes	Hematology	7	%	1	9		7	%	1	9		Normal				Y		Baseline			7	Normal		02	Entered	57	Female	27OCT15	108	MF4637	<250 mg/day	Yes	Yes	<250 mg/day	No	Yes	Yes	Yes	Yes
Baseline	02_001	27OCT15	9:10:00	NEUT	Abs Neutrophil	Hematology	4.2	K/uL	1.5	7.7		4.2	K/uL	1.5	7.7		Normal				Y		Baseline			4.2	Normal		02	Entered	57	Female	27OCT15	108	MF4637	<250 mg/day	Yes	Yes	<250 mg/day	No	Yes	Yes	Yes	Yes
Baseline	02_001	27OCT15	9:10:00	NEUTLE	Neutrophils	Hematology	54	%	45	79		54	%	45	79		Normal				Y		Baseline			54	Normal		02	Entered	57	Female	27OCT15	108	MF4637	<250 mg/day	Yes	Yes	<250 mg/day	No	Yes	Yes	Yes	Yes
Baseline	02_001	27OCT15	9:10:00	PLAT	Platelet Count	Hematology	211	K/uL	150	450		211	K/uL	150	450		Normal				Y		Baseline			211	Normal		02	Entered	57	Female	27OCT15	108	MF4637	<250 mg/day	Yes	Yes	<250 mg/day	No	Yes	Yes	Yes	Yes
Baseline	02_001	27OCT15	9:10:00	RBC	RBC	Hematology	4.69	M/uL	3.7	5.2		4.69	M/uL	3.7	5.2		Normal				Y		Baseline			4.69	Normal		02	Entered	57	Female	27OCT15	108	MF4637	<250 mg/day	Yes	Yes	<250 mg/day	No	Yes	Yes	Yes	Yes
Baseline	02_001	27OCT15	9:10:00	SODIUM	Sodium	Chemistry	140	mmol/L	136	145		140	mmol/L	136	145		Normal				Y		Baseline			140	Normal		02	Entered	57	Female	27OCT15	108	MF4637	<250 mg/day	Yes	Yes	<250 mg/day	No	Yes	Yes	Yes	Yes
Baseline	02_001	27OCT15	9:10:00	TRIG	Triglycerides	Chemistry	363	mg/dL		150		363	mg/dL		150		High				Y		Baseline			363	High		02	Entered	57	Female	27OCT15	108	MF4637	<250 mg/day	Yes	Yes	<250 mg/day	No	Yes	Yes	Yes	Yes
Baseline	02_001	27OCT15	9:10:00	WBC	WBC	Hematology	7.7	K/uL	4	11		7.7	K/uL	4	11		Normal				Y		Baseline			7.7	Normal		02	Entered	57	Female	27OCT15	108	MF4637	<250 mg/day	Yes	Yes	<250 mg/day	No	Yes	Yes	Yes	Yes
Week 12	02_001	15JAN16	9:45:00	ALP	Alkaline Phosphatase	Liver Function Tests	56	IU/L	32	92		56	IU/L	32	92		Normal				N		Week 12			64	Normal	-8	02	Entered	57	Female	27OCT15	108	MF4637	<250 mg/day	Yes	Yes	<250 mg/day	No	Yes	Yes	Yes	Yes
Week 12	02_001	15JAN16	9:45:00	ALT	ALT	Liver Function Tests	36	IU/L	14	54		36	IU/L	14	54		Normal				N		Week 12			31	Normal	5	02	Entered	57	Female	27OCT15	108	MF4637	<250 mg/day	Yes	Yes	<250 mg/day	No	Yes	Yes	Yes	Yes
Week 12	02_001	15JAN16	9:45:00	AST	AST	Liver Function Tests	26	IU/L	15	41		26	IU/L	15	41		Normal				N		Week 12			21	Normal	5	02	Entered	57	Female	27OCT15	108	MF4637	<250 mg/day	Yes	Yes	<250 mg/day	No	Yes	Yes	Yes	Yes
Week 12	02_001	15JAN16	9:45:00	BILIT	Bilirubin Total	Liver Function Tests	0.6	mg/dL	0.3	1.2		0.6	mg/dL	0.3	1.2		Normal				N		Week 12			0.2	Low	0.4	02	Entered	57	Female	27OCT15	108	MF4637	<250 mg/day	Yes	Yes	<250 mg/day	No	Yes	Yes	Yes	Yes
Week 12	02_001	15JAN16	9:45:00	GGT	GGT	Liver Function Tests	48	IU/L	7	50		48	IU/L	7	50		Normal				N		Week 12			55	High	-7	02	Entered	57	Female	27OCT15	108	MF4637	<250 mg/day	Yes	Yes	<250 mg/day	No	Yes	Yes	Yes	Yes
Week 24	02_001	11APR16	9:55:00	ALB	Albumin	Chemistry	4.3	g/dL	3.5	5.2		4.3	g/dL	3.5	5.2		Normal				Y		Week 24			4.3	Normal	0	02	Entered	57	Female	27OCT15	108	MF4637	<250 mg/day	Yes	Yes	<250 mg/day	No	Yes	Yes	Yes	Yes
Week 24	02_001	11APR16	9:55:00	ALP	Alkaline Phosphatase	Liver Function Tests	55	IU/L	32	92		55	IU/L	32	92		Normal				Y		Week 24			64	Normal	-9	02	Entered	57	Female	27OCT15	108	MF4637	<250 mg/day	Yes	Yes	<250 mg/day	No	Yes	Yes	Yes	Yes
Week 24	02_001	11APR16	9:55:00	ALT	ALT	Liver Function Tests	44	IU/L	14	54		44	IU/L	14	54		Normal				Y		Week 24			31	Normal	13	02	Entered	57	Female	27OCT15	108	MF4637	<250 mg/day	Yes	Yes	<250 mg/day	No	Yes	Yes	Yes	Yes
Week 24	02_001	11APR16	9:55:00	AST	AST	Liver Function Tests	32	IU/L	15	41		32	IU/L	15	41		Normal				Y		Week 24			21	Normal	11	02	Entered	57	Female	27OCT15	108	MF4637	<250 mg/day	Yes	Yes	<250 mg/day	No	Yes	Yes	Yes	Yes
Week 24	02_001	11APR16	9:55:00	BASO	Abs Basophils	Hematology	0.1	K/uL	0	0.2		0.1	K/uL	0	0.2		Normal				Y		Week 24			0.1	Normal	0	02	Entered	57	Female	27OCT15	108	MF4637	<250 mg/day	Yes	Yes	<250 mg/day	No	Yes	Yes	Yes	Yes
Week 24	02_001	11APR16	9:55:00	BASOLE	Basophils	Hematology	1	%	0	2		1	%	0	2		Normal				Y		Week 24			1	Normal	0	02	Entered	57	Female	27OCT15	108	MF4637	<250 mg/day	Yes	Yes	<250 mg/day	No	Yes	Yes	Yes	Yes
Week 24	02_001	11APR16	9:55:00	BICARB	BiCarbonate (CO2)	Chemistry	25	mmol/L	22	32		25	mmol/L	22	32		Normal				Y		Week 24			26	Normal	-1	02	Entered	57	Female	27OCT15	108	MF4637	<250 mg/day	Yes	Yes	<250 mg/day	No	Yes	Yes	Yes	Yes
Week 24	02_001	11APR16	9:55:00	BILIT	Bilirubin Total	Liver Function Tests	0.5	mg/dL	0.3	1.2		0.5	mg/dL	0.3	1.2		Normal				Y		Week 24			0.2	Low	0.3	02	Entered	57	Female	27OCT15	108	MF4637	<250 mg/day	Yes	Yes	<250 mg/day	No	Yes	Yes	Yes	Yes
Week 24	02_001	11APR16	9:55:00	BUN	BUN (urea)	Chemistry	16	mg/dL	6	20		16	mg/dL	6	20		Normal				Y		Week 24			19	Normal	-3	02	Entered	57	Female	27OCT15	108	MF4637	<250 mg/day	Yes	Yes	<250 mg/day	No	Yes	Yes	Yes	Yes
Week 24	02_001	11APR16	9:55:00	CA	Calcium	Chemistry	9.2	mg/dL	8.6	10		9.2	mg/dL	8.6	10		Normal				Y		Week 24			10	Normal	-0.8	02	Entered	57	Female	27OCT15	108	MF4637	<250 mg/day	Yes	Yes	<250 mg/day	No	Yes	Yes	Yes	Yes
Week 24	02_001	11APR16	9:55:00	CL	Chloride	Chemistry	103	mmol/L	98	107		103	mmol/L	98	107		Normal				Y		Week 24			102	Normal	1	02	Entered	57	Female	27OCT15	108	MF4637	<250 mg/day	Yes	Yes	<250 mg/day	No	Yes	Yes	Yes	Yes
Week 24	02_001	11APR16	9:55:00	CREAT	Creatinine	Chemistry	0.6	mg/dL	0.6	1.1		0.6	mg/dL	0.6	1.1		Normal				Y		Week 24			0.8	Normal	-0.2	02	Entered	57	Female	27OCT15	108	MF4637	<250 mg/day	Yes	Yes	<250 mg/day	No	Yes	Yes	Yes	Yes
Week 24	02_001	11APR16	9:55:00	CRPHS	hs-CRP	hs-CRP	2.66	mg/L				2.66	mg/L				Normal				Y	hs-CRP CHD risk level: low risk <1.0 mg/L intermediate risk 1.0-3.0 mg/L high risk >3.0 mg/L Values >10 mg/L suggests an inflammatory disorder requiring separate evaluation. Cardiac risk assessment is not appropriate in this context.	Week 24			3.86	Normal	-1.2	02	Entered	57	Female	27OCT15	108	MF4637	<250 mg/day	Yes	Yes	<250 mg/day	No	Yes	Yes	Yes	Yes
Week 24	02_001	11APR16	9:55:00	EOS	Abs Eosinophils	Hematology	0.2	K/uL	0	0.6		0.2	K/uL	0	0.6		Normal				Y		Week 24			0.3	Normal	-0.1	02	Entered	57	Female	27OCT15	108	MF4637	<250 mg/day	Yes	Yes	<250 mg/day	No	Yes	Yes	Yes	Yes
Week 24	02_001	11APR16	9:55:00	EOSLE	Eosinophils	Hematology	4	%	0	4		4	%	0	4		Normal				Y		Week 24			4	Normal	0	02	Entered	57	Female	27OCT15	108	MF4637	<250 mg/day	Yes	Yes	<250 mg/day	No	Yes	Yes	Yes	Yes
Week 24	02_001	11APR16	9:55:00	GGT	GGT	Liver Function Tests	58	IU/L	7	50		58	IU/L	7	50		High				Y		Week 24			55	High	3	02	Entered	57	Female	27OCT15	108	MF4637	<250 mg/day	Yes	Yes	<250 mg/day	No	Yes	Yes	Yes	Yes
Week 24	02_001	11APR16	9:55:00	GLUCF	Glucose Fasting	Chemistry	147	mg/dL	70	99		147	mg/dL	70	99		High				Y		Week 24			132	High	15	02	Entered	57	Female	27OCT15	108	MF4637	<250 mg/day	Yes	Yes	<250 mg/day	No	Yes	Yes	Yes	Yes
Week 24	02_001	11APR16	9:55:00	HBA1C	HbA1c	HbA1c	7.9	%	4	5.6		7.9	%	4	5.6		High				Y	INTERPRETIVE INFORMATION: Hemoglobin A1cHemoglobin A1c values of 5.7-6.4 percent indicate an increasedrisk for developing diabetes mellitus. Hemoglobin A1c valuesgreater than or equal to 6.5 percent are diagnostic of diabetesmellitus. Diagnosis should be confirmed by repeating the Hb A1ctest.This boronate affinity Hb A1c method provides accurate analyticalresults in the presence of nearly all hem…	Week 24			6.9	High	1	02	Entered	57	Female	27OCT15	108	MF4637	<250 mg/day	Yes	Yes	<250 mg/day	No	Yes	Yes	Yes	Yes
Week 24	02_001	11APR16	9:55:00	HCT	Hematocrit	Hematology	43.0	%	36	46		43	%	36	46		Normal				Y		Week 24			43.5	Normal	-0.5	02	Entered	57	Female	27OCT15	108	MF4637	<250 mg/day	Yes	Yes	<250 mg/day	No	Yes	Yes	Yes	Yes
Week 24	02_001	11APR16	9:55:00	HGB	Hemoglobin	Hematology	13.8	g/dL	12	15.5		13.8	g/dL	12	15.5		Normal				Y		Week 24			13.3	Normal	0.5	02	Entered	57	Female	27OCT15	108	MF4637	<250 mg/day	Yes	Yes	<250 mg/day	No	Yes	Yes	Yes	Yes
Week 24	02_001	11APR16	9:55:00	INSULIN	Insulin	Insulin	23.6	uIU/mL	1.9	23		23.6	uIU/mL	1.9	23		High				Y		Week 24			33.7	High	-10.1	02	Entered	57	Female	27OCT15	108	MF4637	<250 mg/day	Yes	Yes	<250 mg/day	No	Yes	Yes	Yes	Yes
Week 24	02_001	11APR16	9:55:00	K	Potassium	Chemistry	4.5	mmol/L	3.5	5.1		4.5	mmol/L	3.5	5.1		Normal				Y		Week 24			3.8	Normal	0.7	02	Entered	57	Female	27OCT15	108	MF4637	<250 mg/day	Yes	Yes	<250 mg/day	No	Yes	Yes	Yes	Yes
Week 24	02_001	11APR16	9:55:00	LYM	Abs Lymphocytes	Hematology	2.2	K/uL	0.8	4		2.2	K/uL	0.8	4		Normal				Y		Week 24			2.6	Normal	-0.4	02	Entered	57	Female	27OCT15	108	MF4637	<250 mg/day	Yes	Yes	<250 mg/day	No	Yes	Yes	Yes	Yes
Week 24	02_001	11APR16	9:55:00	LYMLE	Lymphocytes	Hematology	38	%	20	50		38	%	20	50		Normal				Y		Week 24			34	Normal	4	02	Entered	57	Female	27OCT15	108	MF4637	<250 mg/day	Yes	Yes	<250 mg/day	No	Yes	Yes	Yes	Yes
Week 24	02_001	11APR16	9:55:00	MONO	Abs Monocytes	Hematology	0.4	K/uL	0	0.9		0.4	K/uL	0	0.9		Normal				Y		Week 24			0.5	Normal	-0.1	02	Entered	57	Female	27OCT15	108	MF4637	<250 mg/day	Yes	Yes	<250 mg/day	No	Yes	Yes	Yes	Yes
Week 24	02_001	11APR16	9:55:00	MONOLE	Monocytes	Hematology	6	%	1	9		6	%	1	9		Normal				Y		Week 24			7	Normal	-1	02	Entered	57	Female	27OCT15	108	MF4637	<250 mg/day	Yes	Yes	<250 mg/day	No	Yes	Yes	Yes	Yes
Week 24	02_001	11APR16	9:55:00	NEUT	Abs Neutrophil	Hematology	3.0	K/uL	1.5	7.7		3	K/uL	1.5	7.7		Normal				Y		Week 24			4.2	Normal	-1.2	02	Entered	57	Female	27OCT15	108	MF4637	<250 mg/day	Yes	Yes	<250 mg/day	No	Yes	Yes	Yes	Yes
Week 24	02_001	11APR16	9:55:00	NEUTLE	Neutrophils	Hematology	51	%	45	79		51	%	45	79		Normal				Y		Week 24			54	Normal	-3	02	Entered	57	Female	27OCT15	108	MF4637	<250 mg/day	Yes	Yes	<250 mg/day	No	Yes	Yes	Yes	Yes
Week 24	02_001	11APR16	9:55:00	PLAT	Platelet Count	Hematology	149	K/uL	150	450		149	K/uL	150	450		Low				Y		Week 24			211	Normal	-62	02	Entered	57	Female	27OCT15	108	MF4637	<250 mg/day	Yes	Yes	<250 mg/day	No	Yes	Yes	Yes	Yes
Week 24	02_001	11APR16	9:55:00	RBC	RBC	Hematology	4.73	M/uL	3.7	5.2		4.73	M/uL	3.7	5.2		Normal				Y		Week 24			4.69	Normal	0.04	02	Entered	57	Female	27OCT15	108	MF4637	<250 mg/day	Yes	Yes	<250 mg/day	No	Yes	Yes	Yes	Yes
Week 24	02_001	11APR16	9:55:00	SODIUM	Sodium	Chemistry	139	mmol/L	136	145		139	mmol/L	136	145		Normal				Y		Week 24			140	Normal	-1	02	Entered	57	Female	27OCT15	108	MF4637	<250 mg/day	Yes	Yes	<250 mg/day	No	Yes	Yes	Yes	Yes
Week 24	02_001	11APR16	9:55:00	TRIG	Triglycerides	Chemistry	223	mg/dL		150		223	mg/dL		150		High				Y		Week 24			363	High	-140	02	Entered	57	Female	27OCT15	108	MF4637	<250 mg/day	Yes	Yes	<250 mg/day	No	Yes	Yes	Yes	Yes
Week 24	02_001	11APR16	9:55:00	TSH	TSH	TSH	1.61	uIU/mL	0.34	5.6		1.61	uIU/mL	0.34	5.6		Normal				Y		Week 24			1.54	Normal	0.07	02	Entered	57	Female	27OCT15	108	MF4637	<250 mg/day	Yes	Yes	<250 mg/day	No	Yes	Yes	Yes	Yes
Week 24	02_001	11APR16	9:55:00	WBC	WBC	Hematology	5.9	K/uL	4	11		5.9	K/uL	4	11		Normal				Y		Week 24			7.7	Normal	-1.8	02	Entered	57	Female	27OCT15	108	MF4637	<250 mg/day	Yes	Yes	<250 mg/day	No	Yes	Yes	Yes	Yes
Screening	02_002	22OCT15	16:38:00	ALP	Alkaline Phosphatase	Liver Function Tests	48	IU/L	32	92		48	IU/L	32	92		Normal				N		Screening			57	Normal		02	Entered	41	Male	06NOV15	109	MF4637	<250 mg/day	No	Yes	>=250 mg/day	No	Yes	Yes	Yes	Yes
Screening	02_002	22OCT15	16:38:00	ALT	ALT	Liver Function Tests	61	IU/L	17	63		61	IU/L	17	63		Normal				N		Screening			73	High		02	Entered	41	Male	06NOV15	109	MF4637	<250 mg/day	No	Yes	>=250 mg/day	No	Yes	Yes	Yes	Yes
Screening	02_002	22OCT15	16:38:00	AST	AST	Liver Function Tests	28	IU/L	15	41		28	IU/L	15	41		Normal				N		Screening			31	Normal		02	Entered	41	Male	06NOV15	109	MF4637	<250 mg/day	No	Yes	>=250 mg/day	No	Yes	Yes	Yes	Yes
Screening	02_002	22OCT15	16:38:00	BILIT	Bilirubin Total	Liver Function Tests	0.6	mg/dL	0.3	1.2		0.6	mg/dL	0.3	1.2		Normal				N		Screening			0.6	Normal		02	Entered	41	Male	06NOV15	109	MF4637	<250 mg/day	No	Yes	>=250 mg/day	No	Yes	Yes	Yes	Yes
Screening	02_002	22OCT15	16:38:00	GGT	GGT	Liver Function Tests	38	IU/L	7	50		38	IU/L	7	50		Normal				N		Screening			39	Normal		02	Entered	41	Male	06NOV15	109	MF4637	<250 mg/day	No	Yes	>=250 mg/day	No	Yes	Yes	Yes	Yes
Screening	02_002	22OCT15	16:38:00	HBA1C	HbA1c	HbA1c	5.6	%	4	5.6		5.6	%	4	5.6		Normal				N	INTERPRETIVE INFORMATION: Hemoglobin A1cHemoglobin A1c values of 5.7-6.4 percent indicate an increasedrisk for developing diabetes mellitus. Hemoglobin A1c valuesgreater than or equal to 6.5 percent are diagnostic of diabetesmellitus. Diagnosis should be confirmed by repeating the Hb A1ctest.This boronate affinity Hb A1c method provides accurate analyticalresults in the presence of nearly all hem…	Screening			5.6	Normal		02	Entered	41	Male	06NOV15	109	MF4637	<250 mg/day	No	Yes	>=250 mg/day	No	Yes	Yes	Yes	Yes
Screening	02_002	22OCT15	16:38:00	HCAB	Hepatitis C Antibody	Hepatitis C Antibody	NONREACT				NONREACT					NONREACT					N		Screening						02	Entered	41	Male	06NOV15	109	MF4637	<250 mg/day	No	Yes	>=250 mg/day	No	Yes	Yes	Yes	Yes
Screening	02_002	22OCT15	16:38:00	TSH	TSH	TSH	1.97	uIU/mL	0.34	5.6		1.97	uIU/mL	0.34	5.6		Normal				N		Screening			1.97	Normal		02	Entered	41	Male	06NOV15	109	MF4637	<250 mg/day	No	Yes	>=250 mg/day	No	Yes	Yes	Yes	Yes
Baseline	02_002	05NOV15	9:22:00	ALB	Albumin	Chemistry	5.0	g/dL	3.5	5.2		5	g/dL	3.5	5.2		Normal				Y		Baseline			5	Normal		02	Entered	41	Male	06NOV15	109	MF4637	<250 mg/day	No	Yes	>=250 mg/day	No	Yes	Yes	Yes	Yes
Baseline	02_002	05NOV15	9:22:00	ALP	Alkaline Phosphatase	Liver Function Tests	57	IU/L	32	92		57	IU/L	32	92		Normal				Y		Baseline			57	Normal		02	Entered	41	Male	06NOV15	109	MF4637	<250 mg/day	No	Yes	>=250 mg/day	No	Yes	Yes	Yes	Yes
Baseline	02_002	05NOV15	9:22:00	ALT	ALT	Liver Function Tests	73	IU/L	17	63		73	IU/L	17	63		High				Y		Baseline			73	High		02	Entered	41	Male	06NOV15	109	MF4637	<250 mg/day	No	Yes	>=250 mg/day	No	Yes	Yes	Yes	Yes
Baseline	02_002	05NOV15	9:22:00	AST	AST	Liver Function Tests	31	IU/L	15	41		31	IU/L	15	41		Normal				Y		Baseline			31	Normal		02	Entered	41	Male	06NOV15	109	MF4637	<250 mg/day	No	Yes	>=250 mg/day	No	Yes	Yes	Yes	Yes
Baseline	02_002	05NOV15	9:22:00	BASO	Abs Basophils	Hematology	0.1	K/uL	0	0.2		0.1	K/uL	0	0.2		Normal				Y		Baseline			0.1	Normal		02	Entered	41	Male	06NOV15	109	MF4637	<250 mg/day	No	Yes	>=250 mg/day	No	Yes	Yes	Yes	Yes
Baseline	02_002	05NOV15	9:22:00	BASOLE	Basophils	Hematology	1	%	0	2		1	%	0	2		Normal				Y		Baseline			1	Normal		02	Entered	41	Male	06NOV15	109	MF4637	<250 mg/day	No	Yes	>=250 mg/day	No	Yes	Yes	Yes	Yes
Baseline	02_002	05NOV15	9:22:00	BICARB	BiCarbonate (CO2)	Chemistry	25	mmol/L	22	32		25	mmol/L	22	32		Normal				Y		Baseline			25	Normal		02	Entered	41	Male	06NOV15	109	MF4637	<250 mg/day	No	Yes	>=250 mg/day	No	Yes	Yes	Yes	Yes
Baseline	02_002	05NOV15	9:22:00	BILIT	Bilirubin Total	Liver Function Tests	0.6	mg/dL	0.3	1.2		0.6	mg/dL	0.3	1.2		Normal				Y		Baseline			0.6	Normal		02	Entered	41	Male	06NOV15	109	MF4637	<250 mg/day	No	Yes	>=250 mg/day	No	Yes	Yes	Yes	Yes
Baseline	02_002	05NOV15	9:22:00	BUN	BUN (urea)	Chemistry	10	mg/dL	6	20		10	mg/dL	6	20		Normal				Y		Baseline			10	Normal		02	Entered	41	Male	06NOV15	109	MF4637	<250 mg/day	No	Yes	>=250 mg/day	No	Yes	Yes	Yes	Yes
Baseline	02_002	05NOV15	9:22:00	CA	Calcium	Chemistry	9.4	mg/dL	8.6	10		9.4	mg/dL	8.6	10		Normal				Y		Baseline			9.4	Normal		02	Entered	41	Male	06NOV15	109	MF4637	<250 mg/day	No	Yes	>=250 mg/day	No	Yes	Yes	Yes	Yes
Baseline	02_002	05NOV15	9:22:00	CL	Chloride	Chemistry	101	mmol/L	98	107		101	mmol/L	98	107		Normal				Y		Baseline			101	Normal		02	Entered	41	Male	06NOV15	109	MF4637	<250 mg/day	No	Yes	>=250 mg/day	No	Yes	Yes	Yes	Yes
Baseline	02_002	05NOV15	9:22:00	CREAT	Creatinine	Chemistry	0.6	mg/dL	0.9	1.3		0.6	mg/dL	0.9	1.3		Low				Y		Baseline			0.6	Low		02	Entered	41	Male	06NOV15	109	MF4637	<250 mg/day	No	Yes	>=250 mg/day	No	Yes	Yes	Yes	Yes
Baseline	02_002	05NOV15	9:22:00	CRPHS	hs-CRP	hs-CRP	0.57	mg/L				0.57	mg/L				Normal				Y	hs-CRP CHD risk level: low risk <1.0 mg/L intermediate risk 1.0-3.0 mg/L high risk >3.0 mg/L Values >10 mg/L suggests an inflammatory disorder requiring separate evaluation. Cardiac risk assessment is not appropriate in this context.	Baseline			0.57	Normal		02	Entered	41	Male	06NOV15	109	MF4637	<250 mg/day	No	Yes	>=250 mg/day	No	Yes	Yes	Yes	Yes
Baseline	02_002	05NOV15	9:22:00	EOS	Abs Eosinophils	Hematology	0.2	K/uL	0	0.6		0.2	K/uL	0	0.6		Normal				Y		Baseline			0.2	Normal		02	Entered	41	Male	06NOV15	109	MF4637	<250 mg/day	No	Yes	>=250 mg/day	No	Yes	Yes	Yes	Yes
Baseline	02_002	05NOV15	9:22:00	EOSLE	Eosinophils	Hematology	3	%	0	4		3	%	0	4		Normal				Y		Baseline			3	Normal		02	Entered	41	Male	06NOV15	109	MF4637	<250 mg/day	No	Yes	>=250 mg/day	No	Yes	Yes	Yes	Yes
Baseline	02_002	05NOV15	9:22:00	GGT	GGT	Liver Function Tests	39	IU/L	7	50		39	IU/L	7	50		Normal				Y		Baseline			39	Normal		02	Entered	41	Male	06NOV15	109	MF4637	<250 mg/day	No	Yes	>=250 mg/day	No	Yes	Yes	Yes	Yes
Baseline	02_002	05NOV15	9:22:00	GLUCF	Glucose Fasting	Chemistry	102	mg/dL	70	99		102	mg/dL	70	99		High				Y		Baseline			102	High		02	Entered	41	Male	06NOV15	109	MF4637	<250 mg/day	No	Yes	>=250 mg/day	No	Yes	Yes	Yes	Yes
Baseline	02_002	05NOV15	9:22:00	HCT	Hematocrit	Hematology	44.1	%	38	53		44.1	%	38	53		Normal				Y		Baseline			44.1	Normal		02	Entered	41	Male	06NOV15	109	MF4637	<250 mg/day	No	Yes	>=250 mg/day	No	Yes	Yes	Yes	Yes
Baseline	02_002	05NOV15	9:22:00	HGB	Hemoglobin	Hematology	14.7	g/dL	13.5	17.5		14.7	g/dL	13.5	17.5		Normal				Y		Baseline			14.7	Normal		02	Entered	41	Male	06NOV15	109	MF4637	<250 mg/day	No	Yes	>=250 mg/day	No	Yes	Yes	Yes	Yes
Baseline	02_002	05NOV15	9:22:00	INSULIN	Insulin	Insulin	39.9	uIU/mL	1.9	23		39.9	uIU/mL	1.9	23		High				Y		Baseline			39.9	High		02	Entered	41	Male	06NOV15	109	MF4637	<250 mg/day	No	Yes	>=250 mg/day	No	Yes	Yes	Yes	Yes
Baseline	02_002	05NOV15	9:22:00	K	Potassium	Chemistry	3.5	mmol/L	3.5	5.1		3.5	mmol/L	3.5	5.1		Normal				Y		Baseline			3.5	Normal		02	Entered	41	Male	06NOV15	109	MF4637	<250 mg/day	No	Yes	>=250 mg/day	No	Yes	Yes	Yes	Yes
Baseline	02_002	05NOV15	9:22:00	LYM	Abs Lymphocytes	Hematology	2.1	K/uL	0.8	4		2.1	K/uL	0.8	4		Normal				Y		Baseline			2.1	Normal		02	Entered	41	Male	06NOV15	109	MF4637	<250 mg/day	No	Yes	>=250 mg/day	No	Yes	Yes	Yes	Yes
Baseline	02_002	05NOV15	9:22:00	LYMLE	Lymphocytes	Hematology	34	%	20	50		34	%	20	50		Normal				Y		Baseline			34	Normal		02	Entered	41	Male	06NOV15	109	MF4637	<250 mg/day	No	Yes	>=250 mg/day	No	Yes	Yes	Yes	Yes
Baseline	02_002	05NOV15	9:22:00	MONO	Abs Monocytes	Hematology	0.5	K/uL	0	0.9		0.5	K/uL	0	0.9		Normal				Y		Baseline			0.5	Normal		02	Entered	41	Male	06NOV15	109	MF4637	<250 mg/day	No	Yes	>=250 mg/day	No	Yes	Yes	Yes	Yes
Baseline	02_002	05NOV15	9:22:00	MONOLE	Monocytes	Hematology	8	%	1	9		8	%	1	9		Normal				Y		Baseline			8	Normal		02	Entered	41	Male	06NOV15	109	MF4637	<250 mg/day	No	Yes	>=250 mg/day	No	Yes	Yes	Yes	Yes
Baseline	02_002	05NOV15	9:22:00	NEUT	Abs Neutrophil	Hematology	3.3	K/uL	1.5	7.7		3.3	K/uL	1.5	7.7		Normal				Y		Baseline			3.3	Normal		02	Entered	41	Male	06NOV15	109	MF4637	<250 mg/day	No	Yes	>=250 mg/day	No	Yes	Yes	Yes	Yes
Baseline	02_002	05NOV15	9:22:00	NEUTLE	Neutrophils	Hematology	54	%	45	79		54	%	45	79		Normal				Y		Baseline			54	Normal		02	Entered	41	Male	06NOV15	109	MF4637	<250 mg/day	No	Yes	>=250 mg/day	No	Yes	Yes	Yes	Yes
Baseline	02_002	05NOV15	9:22:00	PLAT	Platelet Count	Hematology	126	K/uL	150	450		126	K/uL	150	450		Low				Y		Baseline			126	Low		02	Entered	41	Male	06NOV15	109	MF4637	<250 mg/day	No	Yes	>=250 mg/day	No	Yes	Yes	Yes	Yes
Baseline	02_002	05NOV15	9:22:00	RBC	RBC	Hematology	4.85	M/uL	4.3	5.8		4.85	M/uL	4.3	5.8		Normal				Y		Baseline			4.85	Normal		02	Entered	41	Male	06NOV15	109	MF4637	<250 mg/day	No	Yes	>=250 mg/day	No	Yes	Yes	Yes	Yes
Baseline	02_002	05NOV15	9:22:00	SODIUM	Sodium	Chemistry	139	mmol/L	136	145		139	mmol/L	136	145		Normal				Y		Baseline			139	Normal		02	Entered	41	Male	06NOV15	109	MF4637	<250 mg/day	No	Yes	>=250 mg/day	No	Yes	Yes	Yes	Yes
Baseline	02_002	05NOV15	9:22:00	TRIG	Triglycerides	Chemistry	521	mg/dL		150		521	mg/dL		150		High				Y		Baseline			521	High		02	Entered	41	Male	06NOV15	109	MF4637	<250 mg/day	No	Yes	>=250 mg/day	No	Yes	Yes	Yes	Yes
Baseline	02_002	05NOV15	9:22:00	WBC	WBC	Hematology	6.1	K/uL	4	11		6.1	K/uL	4	11		Normal				Y		Baseline			6.1	Normal		02	Entered	41	Male	06NOV15	109	MF4637	<250 mg/day	No	Yes	>=250 mg/day	No	Yes	Yes	Yes	Yes
Week 12	02_002	28JAN16	9:30:00	ALP	Alkaline Phosphatase	Liver Function Tests	45	IU/L	32	92		45	IU/L	32	92		Normal				N		Week 12			57	Normal	-12	02	Entered	41	Male	06NOV15	109	MF4637	<250 mg/day	No	Yes	>=250 mg/day	No	Yes	Yes	Yes	Yes
Week 12	02_002	28JAN16	9:30:00	ALT	ALT	Liver Function Tests	127	IU/L	17	63		127	IU/L	17	63		High				N		Week 12			73	High	54	02	Entered	41	Male	06NOV15	109	MF4637	<250 mg/day	No	Yes	>=250 mg/day	No	Yes	Yes	Yes	Yes
Week 12	02_002	28JAN16	9:30:00	AST	AST	Liver Function Tests	48	IU/L	15	41		48	IU/L	15	41		High				N		Week 12			31	Normal	17	02	Entered	41	Male	06NOV15	109	MF4637	<250 mg/day	No	Yes	>=250 mg/day	No	Yes	Yes	Yes	Yes
Week 12	02_002	28JAN16	9:30:00	BASO	Abs Basophils	Hematology	0.1	K/uL	0	0.2		0.1	K/uL	0	0.2		Normal				N		Week 12			0.1	Normal	0	02	Entered	41	Male	06NOV15	109	MF4637	<250 mg/day	No	Yes	>=250 mg/day	No	Yes	Yes	Yes	Yes
Week 12	02_002	28JAN16	9:30:00	BASOLE	Basophils	Hematology	1	%	0	2		1	%	0	2		Normal				N		Week 12			1	Normal	0	02	Entered	41	Male	06NOV15	109	MF4637	<250 mg/day	No	Yes	>=250 mg/day	No	Yes	Yes	Yes	Yes
Week 12	02_002	28JAN16	9:30:00	BILIT	Bilirubin Total	Liver Function Tests	0.9	mg/dL	0.3	1.2		0.9	mg/dL	0.3	1.2		Normal				N		Week 12			0.6	Normal	0.3	02	Entered	41	Male	06NOV15	109	MF4637	<250 mg/day	No	Yes	>=250 mg/day	No	Yes	Yes	Yes	Yes
Week 12	02_002	28JAN16	9:30:00	EOS	Abs Eosinophils	Hematology	0.1	K/uL	0	0.6		0.1	K/uL	0	0.6		Normal				N		Week 12			0.2	Normal	-0.1	02	Entered	41	Male	06NOV15	109	MF4637	<250 mg/day	No	Yes	>=250 mg/day	No	Yes	Yes	Yes	Yes
Week 12	02_002	28JAN16	9:30:00	EOSLE	Eosinophils	Hematology	2	%	0	4		2	%	0	4		Normal				N		Week 12			3	Normal	-1	02	Entered	41	Male	06NOV15	109	MF4637	<250 mg/day	No	Yes	>=250 mg/day	No	Yes	Yes	Yes	Yes
Week 12	02_002	28JAN16	9:30:00	GGT	GGT	Liver Function Tests	54	IU/L	7	50		54	IU/L	7	50		High				N		Week 12			39	Normal	15	02	Entered	41	Male	06NOV15	109	MF4637	<250 mg/day	No	Yes	>=250 mg/day	No	Yes	Yes	Yes	Yes
Week 12	02_002	28JAN16	9:30:00	HCT	Hematocrit	Hematology	44.0	%	38	53		44	%	38	53		Normal				N		Week 12			44.1	Normal	-0.1	02	Entered	41	Male	06NOV15	109	MF4637	<250 mg/day	No	Yes	>=250 mg/day	No	Yes	Yes	Yes	Yes
Week 12	02_002	28JAN16	9:30:00	HGB	Hemoglobin	Hematology	14.3	g/dL	13.5	17.5		14.3	g/dL	13.5	17.5		Normal				N		Week 12			14.7	Normal	-0.4	02	Entered	41	Male	06NOV15	109	MF4637	<250 mg/day	No	Yes	>=250 mg/day	No	Yes	Yes	Yes	Yes
Week 12	02_002	28JAN16	9:30:00	LYM	Abs Lymphocytes	Hematology	1.5	K/uL	0.8	4		1.5	K/uL	0.8	4		Normal				N		Week 12			2.1	Normal	-0.6	02	Entered	41	Male	06NOV15	109	MF4637	<250 mg/day	No	Yes	>=250 mg/day	No	Yes	Yes	Yes	Yes
Week 12	02_002	28JAN16	9:30:00	LYMLE	Lymphocytes	Hematology	24	%	20	50		24	%	20	50		Normal				N		Week 12			34	Normal	-10	02	Entered	41	Male	06NOV15	109	MF4637	<250 mg/day	No	Yes	>=250 mg/day	No	Yes	Yes	Yes	Yes
Week 12	02_002	28JAN16	9:30:00	MONO	Abs Monocytes	Hematology	0.5	K/uL	0	0.9		0.5	K/uL	0	0.9		Normal				N		Week 12			0.5	Normal	0	02	Entered	41	Male	06NOV15	109	MF4637	<250 mg/day	No	Yes	>=250 mg/day	No	Yes	Yes	Yes	Yes
Week 12	02_002	28JAN16	9:30:00	MONOLE	Monocytes	Hematology	8	%	1	9		8	%	1	9		Normal				N		Week 12			8	Normal	0	02	Entered	41	Male	06NOV15	109	MF4637	<250 mg/day	No	Yes	>=250 mg/day	No	Yes	Yes	Yes	Yes
Week 12	02_002	28JAN16	9:30:00	NEUT	Abs Neutrophil	Hematology	4.0	K/uL	1.5	7.7		4	K/uL	1.5	7.7		Normal				N		Week 12			3.3	Normal	0.7	02	Entered	41	Male	06NOV15	109	MF4637	<250 mg/day	No	Yes	>=250 mg/day	No	Yes	Yes	Yes	Yes
Week 12	02_002	28JAN16	9:30:00	NEUTLE	Neutrophils	Hematology	65	%	45	79		65	%	45	79		Normal				N		Week 12			54	Normal	11	02	Entered	41	Male	06NOV15	109	MF4637	<250 mg/day	No	Yes	>=250 mg/day	No	Yes	Yes	Yes	Yes
Week 12	02_002	28JAN16	9:30:00	PLAT	Platelet Count	Hematology	116	K/uL	150	450		116	K/uL	150	450		Low				N		Week 12			126	Low	-10	02	Entered	41	Male	06NOV15	109	MF4637	<250 mg/day	No	Yes	>=250 mg/day	No	Yes	Yes	Yes	Yes
Week 12	02_002	28JAN16	9:30:00	RBC	RBC	Hematology	4.75	M/uL	4.3	5.8		4.75	M/uL	4.3	5.8		Normal				N		Week 12			4.85	Normal	-0.1	02	Entered	41	Male	06NOV15	109	MF4637	<250 mg/day	No	Yes	>=250 mg/day	No	Yes	Yes	Yes	Yes
Week 12	02_002	28JAN16	9:30:00	WBC	WBC	Hematology	6.1	K/uL	4	11		6.1	K/uL	4	11		Normal				N		Week 12			6.1	Normal	0	02	Entered	41	Male	06NOV15	109	MF4637	<250 mg/day	No	Yes	>=250 mg/day	No	Yes	Yes	Yes	Yes
Week 24	02_002	22APR16	9:40:00	ALB	Albumin	Chemistry	4.3	g/dL	3.5	5.2		4.3	g/dL	3.5	5.2		Normal				Y		Week 24			5	Normal	-0.7	02	Entered	41	Male	06NOV15	109	MF4637	<250 mg/day	No	Yes	>=250 mg/day	No	Yes	Yes	Yes	Yes
Week 24	02_002	22APR16	9:40:00	ALP	Alkaline Phosphatase	Liver Function Tests	50	IU/L	32	92		50	IU/L	32	92		Normal				Y		Week 24			57	Normal	-7	02	Entered	41	Male	06NOV15	109	MF4637	<250 mg/day	No	Yes	>=250 mg/day	No	Yes	Yes	Yes	Yes
Week 24	02_002	22APR16	9:40:00	ALT	ALT	Liver Function Tests	55	IU/L	17	63		55	IU/L	17	63		Normal				Y		Week 24			73	High	-18	02	Entered	41	Male	06NOV15	109	MF4637	<250 mg/day	No	Yes	>=250 mg/day	No	Yes	Yes	Yes	Yes
Week 24	02_002	22APR16	9:40:00	AST	AST	Liver Function Tests	27	IU/L	15	41		27	IU/L	15	41		Normal				Y		Week 24			31	Normal	-4	02	Entered	41	Male	06NOV15	109	MF4637	<250 mg/day	No	Yes	>=250 mg/day	No	Yes	Yes	Yes	Yes
Week 24	02_002	22APR16	9:40:00	BASO	Abs Basophils	Hematology	0.0	K/uL	0	0.2		0	K/uL	0	0.2		Normal				Y		Week 24			0.1	Normal	-0.1	02	Entered	41	Male	06NOV15	109	MF4637	<250 mg/day	No	Yes	>=250 mg/day	No	Yes	Yes	Yes	Yes
Week 24	02_002	22APR16	9:40:00	BASOLE	Basophils	Hematology	0	%	0	2		0	%	0	2		Normal				Y		Week 24			1	Normal	-1	02	Entered	41	Male	06NOV15	109	MF4637	<250 mg/day	No	Yes	>=250 mg/day	No	Yes	Yes	Yes	Yes
Week 24	02_002	22APR16	9:40:00	BICARB	BiCarbonate (CO2)	Chemistry	25	mmol/L	22	32		25	mmol/L	22	32		Normal				Y		Week 24			25	Normal	0	02	Entered	41	Male	06NOV15	109	MF4637	<250 mg/day	No	Yes	>=250 mg/day	No	Yes	Yes	Yes	Yes
Week 24	02_002	22APR16	9:40:00	BILIT	Bilirubin Total	Liver Function Tests	1.0	mg/dL	0.3	1.2		1	mg/dL	0.3	1.2		Normal				Y		Week 24			0.6	Normal	0.4	02	Entered	41	Male	06NOV15	109	MF4637	<250 mg/day	No	Yes	>=250 mg/day	No	Yes	Yes	Yes	Yes
Week 24	02_002	22APR16	9:40:00	BUN	BUN (urea)	Chemistry	18	mg/dL	6	20		18	mg/dL	6	20		Normal				Y		Week 24			10	Normal	8	02	Entered	41	Male	06NOV15	109	MF4637	<250 mg/day	No	Yes	>=250 mg/day	No	Yes	Yes	Yes	Yes
Week 24	02_002	22APR16	9:40:00	CA	Calcium	Chemistry	9.1	mg/dL	8.6	10		9.1	mg/dL	8.6	10		Normal				Y		Week 24			9.4	Normal	-0.3	02	Entered	41	Male	06NOV15	109	MF4637	<250 mg/day	No	Yes	>=250 mg/day	No	Yes	Yes	Yes	Yes
Week 24	02_002	22APR16	9:40:00	CL	Chloride	Chemistry	102	mmol/L	98	107		102	mmol/L	98	107		Normal				Y		Week 24			101	Normal	1	02	Entered	41	Male	06NOV15	109	MF4637	<250 mg/day	No	Yes	>=250 mg/day	No	Yes	Yes	Yes	Yes
Week 24	02_002	22APR16	9:40:00	CREAT	Creatinine	Chemistry	0.8	mg/dL	0.9	1.3		0.8	mg/dL	0.9	1.3		Low				Y		Week 24			0.6	Low	0.2	02	Entered	41	Male	06NOV15	109	MF4637	<250 mg/day	No	Yes	>=250 mg/day	No	Yes	Yes	Yes	Yes
Week 24	02_002	22APR16	9:40:00	CRPHS	hs-CRP	hs-CRP	5.22	mg/L				5.22	mg/L				Normal				Y	hs-CRP CHD risk level: low risk <1.0 mg/L intermediate risk 1.0-3.0 mg/L high risk >3.0 mg/L Values >10 mg/L suggests an inflammatory disorder requiring separate evaluation. Cardiac risk assessment is not appropriate in this context.	Week 24			0.57	Normal	4.65	02	Entered	41	Male	06NOV15	109	MF4637	<250 mg/day	No	Yes	>=250 mg/day	No	Yes	Yes	Yes	Yes
Week 24	02_002	22APR16	9:40:00	EOS	Abs Eosinophils	Hematology	0.1	K/uL	0	0.6		0.1	K/uL	0	0.6		Normal				Y		Week 24			0.2	Normal	-0.1	02	Entered	41	Male	06NOV15	109	MF4637	<250 mg/day	No	Yes	>=250 mg/day	No	Yes	Yes	Yes	Yes
Week 24	02_002	22APR16	9:40:00	EOSLE	Eosinophils	Hematology	3	%	0	4		3	%	0	4		Normal				Y		Week 24			3	Normal	0	02	Entered	41	Male	06NOV15	109	MF4637	<250 mg/day	No	Yes	>=250 mg/day	No	Yes	Yes	Yes	Yes
Week 24	02_002	22APR16	9:40:00	GGT	GGT	Liver Function Tests	30	IU/L	7	50		30	IU/L	7	50		Normal				Y		Week 24			39	Normal	-9	02	Entered	41	Male	06NOV15	109	MF4637	<250 mg/day	No	Yes	>=250 mg/day	No	Yes	Yes	Yes	Yes
Week 24	02_002	22APR16	9:40:00	GLUCF	Glucose Fasting	Chemistry	105	mg/dL	70	99		105	mg/dL	70	99		High				Y		Week 24			102	High	3	02	Entered	41	Male	06NOV15	109	MF4637	<250 mg/day	No	Yes	>=250 mg/day	No	Yes	Yes	Yes	Yes
Week 24	02_002	22APR16	9:40:00	HBA1C	HbA1c	HbA1c	5.4	%	4	5.6		5.4	%	4	5.6		Normal				Y	INTERPRETIVE INFORMATION: Hemoglobin A1cHemoglobin A1c values of 5.7-6.4 percent indicate an increasedrisk for developing diabetes mellitus. Hemoglobin A1c valuesgreater than or equal to 6.5 percent are diagnostic of diabetesmellitus. Diagnosis should be confirmed by repeating the Hb A1ctest.This boronate affinity Hb A1c method provides accurate analyticalresults in the presence of nearly all hem…	Week 24			5.6	Normal	-0.2	02	Entered	41	Male	06NOV15	109	MF4637	<250 mg/day	No	Yes	>=250 mg/day	No	Yes	Yes	Yes	Yes
Week 24	02_002	22APR16	9:40:00	HCT	Hematocrit	Hematology	40.4	%	38	53		40.4	%	38	53		Normal				Y		Week 24			44.1	Normal	-3.7	02	Entered	41	Male	06NOV15	109	MF4637	<250 mg/day	No	Yes	>=250 mg/day	No	Yes	Yes	Yes	Yes
Week 24	02_002	22APR16	9:40:00	HGB	Hemoglobin	Hematology	13.9	g/dL	13.5	17.5		13.9	g/dL	13.5	17.5		Normal				Y		Week 24			14.7	Normal	-0.8	02	Entered	41	Male	06NOV15	109	MF4637	<250 mg/day	No	Yes	>=250 mg/day	No	Yes	Yes	Yes	Yes
Week 24	02_002	22APR16	9:40:00	INSULIN	Insulin	Insulin	78.6	uIU/mL	1.9	23		78.6	uIU/mL	1.9	23		High				Y		Week 24			39.9	High	38.7	02	Entered	41	Male	06NOV15	109	MF4637	<250 mg/day	No	Yes	>=250 mg/day	No	Yes	Yes	Yes	Yes
Week 24	02_002	22APR16	9:40:00	K	Potassium	Chemistry	3.7	mmol/L	3.5	5.1		3.7	mmol/L	3.5	5.1		Normal				Y		Week 24			3.5	Normal	0.2	02	Entered	41	Male	06NOV15	109	MF4637	<250 mg/day	No	Yes	>=250 mg/day	No	Yes	Yes	Yes	Yes
Week 24	02_002	22APR16	9:40:00	LYM	Abs Lymphocytes	Hematology	0.5	K/uL	0.8	4		0.5	K/uL	0.8	4		Low				Y		Week 24			2.1	Normal	-1.6	02	Entered	41	Male	06NOV15	109	MF4637	<250 mg/day	No	Yes	>=250 mg/day	No	Yes	Yes	Yes	Yes
Week 24	02_002	22APR16	9:40:00	LYMLE	Lymphocytes	Hematology	11	%	20	50		11	%	20	50		Low				Y		Week 24			34	Normal	-23	02	Entered	41	Male	06NOV15	109	MF4637	<250 mg/day	No	Yes	>=250 mg/day	No	Yes	Yes	Yes	Yes
Week 24	02_002	22APR16	9:40:00	MONO	Abs Monocytes	Hematology	0.4	K/uL	0	0.9		0.4	K/uL	0	0.9		Normal				Y		Week 24			0.5	Normal	-0.1	02	Entered	41	Male	06NOV15	109	MF4637	<250 mg/day	No	Yes	>=250 mg/day	No	Yes	Yes	Yes	Yes
Week 24	02_002	22APR16	9:40:00	MONOLE	Monocytes	Hematology	8	%	1	9		8	%	1	9		Normal				Y		Week 24			8	Normal	0	02	Entered	41	Male	06NOV15	109	MF4637	<250 mg/day	No	Yes	>=250 mg/day	No	Yes	Yes	Yes	Yes
Week 24	02_002	22APR16	9:40:00	NEUT	Abs Neutrophil	Hematology	3.6	K/uL	1.5	7.7		3.6	K/uL	1.5	7.7		Normal				Y		Week 24			3.3	Normal	0.3	02	Entered	41	Male	06NOV15	109	MF4637	<250 mg/day	No	Yes	>=250 mg/day	No	Yes	Yes	Yes	Yes
Week 24	02_002	22APR16	9:40:00	NEUTLE	Neutrophils	Hematology	78	%	45	79		78	%	45	79		Normal				Y		Week 24			54	Normal	24	02	Entered	41	Male	06NOV15	109	MF4637	<250 mg/day	No	Yes	>=250 mg/day	No	Yes	Yes	Yes	Yes
Week 24	02_002	22APR16	9:40:00	PLAT	Platelet Count	Hematology	117	K/uL	150	450		117	K/uL	150	450		Low				Y		Week 24			126	Low	-9	02	Entered	41	Male	06NOV15	109	MF4637	<250 mg/day	No	Yes	>=250 mg/day	No	Yes	Yes	Yes	Yes
Week 24	02_002	22APR16	9:40:00	RBC	RBC	Hematology	4.43	M/uL	4.3	5.8		4.43	M/uL	4.3	5.8		Normal				Y		Week 24			4.85	Normal	-0.42	02	Entered	41	Male	06NOV15	109	MF4637	<250 mg/day	No	Yes	>=250 mg/day	No	Yes	Yes	Yes	Yes
Week 24	02_002	22APR16	9:40:00	SODIUM	Sodium	Chemistry	140	mmol/L	136	145		140	mmol/L	136	145		Normal				Y		Week 24			139	Normal	1	02	Entered	41	Male	06NOV15	109	MF4637	<250 mg/day	No	Yes	>=250 mg/day	No	Yes	Yes	Yes	Yes
Week 24	02_002	22APR16	9:40:00	TRIG	Triglycerides	Chemistry	313	mg/dL		150		313	mg/dL		150		High				Y		Week 24			521	High	-208	02	Entered	41	Male	06NOV15	109	MF4637	<250 mg/day	No	Yes	>=250 mg/day	No	Yes	Yes	Yes	Yes
Week 24	02_002	22APR16	9:40:00	TSH	TSH	TSH	1.51	uIU/mL	0.34	5.6		1.51	uIU/mL	0.34	5.6		Normal				Y		Week 24			1.97	Normal	-0.46	02	Entered	41	Male	06NOV15	109	MF4637	<250 mg/day	No	Yes	>=250 mg/day	No	Yes	Yes	Yes	Yes
Week 24	02_002	22APR16	9:40:00	WBC	WBC	Hematology	4.6	K/uL	4	11		4.6	K/uL	4	11		Normal				Y		Week 24			6.1	Normal	-1.5	02	Entered	41	Male	06NOV15	109	MF4637	<250 mg/day	No	Yes	>=250 mg/day	No	Yes	Yes	Yes	Yes
Screening	02_003	23OCT15	9:33:00	ALP	Alkaline Phosphatase	Liver Function Tests	66.0	IU/L	32	92		66	IU/L	32	92		Normal				N		Screening			60	Normal		02	Entered	58	Male	03NOV15	110	Placebo	>=250 mg/day	Yes	Yes	<250 mg/day	No	Yes	Yes	Yes	Yes
Screening	02_003	23OCT15	9:33:00	ALT	ALT	Liver Function Tests	80	IU/L	17	63		80	IU/L	17	63		High				N		Screening			69	High		02	Entered	58	Male	03NOV15	110	Placebo	>=250 mg/day	Yes	Yes	<250 mg/day	No	Yes	Yes	Yes	Yes
Screening	02_003	23OCT15	9:33:00	AST	AST	Liver Function Tests	35	IU/L	15	41		35	IU/L	15	41		Normal				N		Screening			40	Normal		02	Entered	58	Male	03NOV15	110	Placebo	>=250 mg/day	Yes	Yes	<250 mg/day	No	Yes	Yes	Yes	Yes
Screening	02_003	23OCT15	9:33:00	BILIT	Bilirubin Total	Liver Function Tests	0.7	mg/dL	0.3	1.2		0.7	mg/dL	0.3	1.2		Normal				N		Screening			0.5	Normal		02	Entered	58	Male	03NOV15	110	Placebo	>=250 mg/day	Yes	Yes	<250 mg/day	No	Yes	Yes	Yes	Yes
Screening	02_003	23OCT15	9:33:00	GGT	GGT	Liver Function Tests	23	IU/L	7	50		23	IU/L	7	50		Normal				N		Screening			20	Normal		02	Entered	58	Male	03NOV15	110	Placebo	>=250 mg/day	Yes	Yes	<250 mg/day	No	Yes	Yes	Yes	Yes
Screening	02_003	23OCT15	9:33:00	HBA1C	HbA1c	HbA1c	6.1	%	4	5.6		6.1	%	4	5.6		High				N	INTERPRETIVE INFORMATION: Hemoglobin A1cHemoglobin A1c values of 5.7-6.4 percent indicate an increasedrisk for developing diabetes mellitus. Hemoglobin A1c valuesgreater than or equal to 6.5 percent are diagnostic of diabetesmellitus. Diagnosis should be confirmed by repeating the Hb A1ctest.This boronate affinity Hb A1c method provides accurate analyticalresults in the presence of nearly all hem…	Screening			6.1	High		02	Entered	58	Male	03NOV15	110	Placebo	>=250 mg/day	Yes	Yes	<250 mg/day	No	Yes	Yes	Yes	Yes
Screening	02_003	23OCT15	9:33:00	HCAB	Hepatitis C Antibody	Hepatitis C Antibody	NONREACT				NONREACT					NONREACT					N		Screening						02	Entered	58	Male	03NOV15	110	Placebo	>=250 mg/day	Yes	Yes	<250 mg/day	No	Yes	Yes	Yes	Yes
Screening	02_003	23OCT15	9:33:00	TSH	TSH	TSH	2.35	uIU/mL	0.34	5.6		2.35	uIU/mL	0.34	5.6		Normal				N		Screening			2.35	Normal		02	Entered	58	Male	03NOV15	110	Placebo	>=250 mg/day	Yes	Yes	<250 mg/day	No	Yes	Yes	Yes	Yes
Baseline	02_003	03NOV15	9:20:00	ALB	Albumin	Chemistry	4.6	g/dL	3.5	5.2		4.6	g/dL	3.5	5.2		Normal				Y		Baseline			4.6	Normal		02	Entered	58	Male	03NOV15	110	Placebo	>=250 mg/day	Yes	Yes	<250 mg/day	No	Yes	Yes	Yes	Yes
Baseline	02_003	03NOV15	9:20:00	ALP	Alkaline Phosphatase	Liver Function Tests	60	IU/L	32	92		60	IU/L	32	92		Normal				Y		Baseline			60	Normal		02	Entered	58	Male	03NOV15	110	Placebo	>=250 mg/day	Yes	Yes	<250 mg/day	No	Yes	Yes	Yes	Yes
Baseline	02_003	03NOV15	9:20:00	ALT	ALT	Liver Function Tests	69	IU/L	17	63		69	IU/L	17	63		High				Y		Baseline			69	High		02	Entered	58	Male	03NOV15	110	Placebo	>=250 mg/day	Yes	Yes	<250 mg/day	No	Yes	Yes	Yes	Yes
Baseline	02_003	03NOV15	9:20:00	AST	AST	Liver Function Tests	40	IU/L	15	41		40	IU/L	15	41		Normal				Y		Baseline			40	Normal		02	Entered	58	Male	03NOV15	110	Placebo	>=250 mg/day	Yes	Yes	<250 mg/day	No	Yes	Yes	Yes	Yes
Baseline	02_003	03NOV15	9:20:00	BASO	Abs Basophils	Hematology	0.1	K/uL	0	0.2		0.1	K/uL	0	0.2		Normal				Y		Baseline			0.1	Normal		02	Entered	58	Male	03NOV15	110	Placebo	>=250 mg/day	Yes	Yes	<250 mg/day	No	Yes	Yes	Yes	Yes
Baseline	02_003	03NOV15	9:20:00	BASOLE	Basophils	Hematology	1	%	0	2		1	%	0	2		Normal				Y		Baseline			1	Normal		02	Entered	58	Male	03NOV15	110	Placebo	>=250 mg/day	Yes	Yes	<250 mg/day	No	Yes	Yes	Yes	Yes
Baseline	02_003	03NOV15	9:20:00	BICARB	BiCarbonate (CO2)	Chemistry	24	mmol/L	22	32		24	mmol/L	22	32		Normal				Y		Baseline			24	Normal		02	Entered	58	Male	03NOV15	110	Placebo	>=250 mg/day	Yes	Yes	<250 mg/day	No	Yes	Yes	Yes	Yes
Baseline	02_003	03NOV15	9:20:00	BILIT	Bilirubin Total	Liver Function Tests	0.5	mg/dL	0.3	1.2		0.5	mg/dL	0.3	1.2		Normal				Y		Baseline			0.5	Normal		02	Entered	58	Male	03NOV15	110	Placebo	>=250 mg/day	Yes	Yes	<250 mg/day	No	Yes	Yes	Yes	Yes
Baseline	02_003	03NOV15	9:20:00	BUN	BUN (urea)	Chemistry	15	mg/dL	6	20		15	mg/dL	6	20		Normal				Y		Baseline			15	Normal		02	Entered	58	Male	03NOV15	110	Placebo	>=250 mg/day	Yes	Yes	<250 mg/day	No	Yes	Yes	Yes	Yes
Baseline	02_003	03NOV15	9:20:00	CA	Calcium	Chemistry	9.5	mg/dL	8.6	10		9.5	mg/dL	8.6	10		Normal				Y		Baseline			9.5	Normal		02	Entered	58	Male	03NOV15	110	Placebo	>=250 mg/day	Yes	Yes	<250 mg/day	No	Yes	Yes	Yes	Yes
Baseline	02_003	03NOV15	9:20:00	CL	Chloride	Chemistry	101	mmol/L	98	107		101	mmol/L	98	107		Normal				Y		Baseline			101	Normal		02	Entered	58	Male	03NOV15	110	Placebo	>=250 mg/day	Yes	Yes	<250 mg/day	No	Yes	Yes	Yes	Yes
Baseline	02_003	03NOV15	9:20:00	CREAT	Creatinine	Chemistry	1.1	mg/dL	0.9	1.3		1.1	mg/dL	0.9	1.3		Normal				Y		Baseline			1.1	Normal		02	Entered	58	Male	03NOV15	110	Placebo	>=250 mg/day	Yes	Yes	<250 mg/day	No	Yes	Yes	Yes	Yes
Baseline	02_003	03NOV15	9:20:00	CRPHS	hs-CRP	hs-CRP	0.52	mg/L				0.52	mg/L				Normal				Y	hs-CRP CHD risk level: low risk <1.0 mg/L intermediate risk 1.0-3.0 mg/L high risk >3.0 mg/L Values >10 mg/L suggests an inflammatory disorder requiring separate evaluation. Cardiac risk assessment is not appropriate in this context.	Baseline			0.52	Normal		02	Entered	58	Male	03NOV15	110	Placebo	>=250 mg/day	Yes	Yes	<250 mg/day	No	Yes	Yes	Yes	Yes
Baseline	02_003	03NOV15	9:20:00	EOS	Abs Eosinophils	Hematology	0.2	K/uL	0	0.6		0.2	K/uL	0	0.6		Normal				Y		Baseline			0.2	Normal		02	Entered	58	Male	03NOV15	110	Placebo	>=250 mg/day	Yes	Yes	<250 mg/day	No	Yes	Yes	Yes	Yes
Baseline	02_003	03NOV15	9:20:00	EOSLE	Eosinophils	Hematology	4	%	0	4		4	%	0	4		Normal				Y		Baseline			4	Normal		02	Entered	58	Male	03NOV15	110	Placebo	>=250 mg/day	Yes	Yes	<250 mg/day	No	Yes	Yes	Yes	Yes
Baseline	02_003	03NOV15	9:20:00	GGT	GGT	Liver Function Tests	20	IU/L	7	50		20	IU/L	7	50		Normal				Y		Baseline			20	Normal		02	Entered	58	Male	03NOV15	110	Placebo	>=250 mg/day	Yes	Yes	<250 mg/day	No	Yes	Yes	Yes	Yes
Baseline	02_003	03NOV15	9:20:00	GLUCF	Glucose Fasting	Chemistry	105	mg/dL	70	99		105	mg/dL	70	99		High				Y		Baseline			105	High		02	Entered	58	Male	03NOV15	110	Placebo	>=250 mg/day	Yes	Yes	<250 mg/day	No	Yes	Yes	Yes	Yes
Baseline	02_003	03NOV15	9:20:00	HCT	Hematocrit	Hematology	42.5	%	38	53		42.5	%	38	53		Normal				Y		Baseline			42.5	Normal		02	Entered	58	Male	03NOV15	110	Placebo	>=250 mg/day	Yes	Yes	<250 mg/day	No	Yes	Yes	Yes	Yes
Baseline	02_003	03NOV15	9:20:00	HGB	Hemoglobin	Hematology	13.5	g/dL	13.5	17.5		13.5	g/dL	13.5	17.5		Normal				Y		Baseline			13.5	Normal		02	Entered	58	Male	03NOV15	110	Placebo	>=250 mg/day	Yes	Yes	<250 mg/day	No	Yes	Yes	Yes	Yes
Baseline	02_003	03NOV15	9:20:00	INSULIN	Insulin	Insulin	17.8	uIU/mL	1.9	23		17.8	uIU/mL	1.9	23		Normal				Y		Baseline			17.8	Normal		02	Entered	58	Male	03NOV15	110	Placebo	>=250 mg/day	Yes	Yes	<250 mg/day	No	Yes	Yes	Yes	Yes
Baseline	02_003	03NOV15	9:20:00	K	Potassium	Chemistry	4.0	mmol/L	3.5	5.1		4	mmol/L	3.5	5.1		Normal				Y		Baseline			4	Normal		02	Entered	58	Male	03NOV15	110	Placebo	>=250 mg/day	Yes	Yes	<250 mg/day	No	Yes	Yes	Yes	Yes
Baseline	02_003	03NOV15	9:20:00	LYM	Abs Lymphocytes	Hematology	2.0	K/uL	0.8	4		2	K/uL	0.8	4		Normal				Y		Baseline			2	Normal		02	Entered	58	Male	03NOV15	110	Placebo	>=250 mg/day	Yes	Yes	<250 mg/day	No	Yes	Yes	Yes	Yes
Baseline	02_003	03NOV15	9:20:00	LYMLE	Lymphocytes	Hematology	34	%	20	50		34	%	20	50		Normal				Y		Baseline			34	Normal		02	Entered	58	Male	03NOV15	110	Placebo	>=250 mg/day	Yes	Yes	<250 mg/day	No	Yes	Yes	Yes	Yes
Baseline	02_003	03NOV15	9:20:00	MONO	Abs Monocytes	Hematology	0.6	K/uL	0	0.9		0.6	K/uL	0	0.9		Normal				Y		Baseline			0.6	Normal		02	Entered	58	Male	03NOV15	110	Placebo	>=250 mg/day	Yes	Yes	<250 mg/day	No	Yes	Yes	Yes	Yes
Baseline	02_003	03NOV15	9:20:00	MONOLE	Monocytes	Hematology	10	%	1	9		10	%	1	9		High				Y		Baseline			10	High		02	Entered	58	Male	03NOV15	110	Placebo	>=250 mg/day	Yes	Yes	<250 mg/day	No	Yes	Yes	Yes	Yes
Baseline	02_003	03NOV15	9:20:00	NEUT	Abs Neutrophil	Hematology	3.0	K/uL	1.5	7.7		3	K/uL	1.5	7.7		Normal				Y		Baseline			3	Normal		02	Entered	58	Male	03NOV15	110	Placebo	>=250 mg/day	Yes	Yes	<250 mg/day	No	Yes	Yes	Yes	Yes
Baseline	02_003	03NOV15	9:20:00	NEUTLE	Neutrophils	Hematology	51	%	45	79		51	%	45	79		Normal				Y		Baseline			51	Normal		02	Entered	58	Male	03NOV15	110	Placebo	>=250 mg/day	Yes	Yes	<250 mg/day	No	Yes	Yes	Yes	Yes
Baseline	02_003	03NOV15	9:20:00	PLAT	Platelet Count	Hematology	273	K/uL	150	450		273	K/uL	150	450		Normal				Y		Baseline			273	Normal		02	Entered	58	Male	03NOV15	110	Placebo	>=250 mg/day	Yes	Yes	<250 mg/day	No	Yes	Yes	Yes	Yes
Baseline	02_003	03NOV15	9:20:00	RBC	RBC	Hematology	4.66	M/uL	4.3	5.8		4.66	M/uL	4.3	5.8		Normal				Y		Baseline			4.66	Normal		02	Entered	58	Male	03NOV15	110	Placebo	>=250 mg/day	Yes	Yes	<250 mg/day	No	Yes	Yes	Yes	Yes
Baseline	02_003	03NOV15	9:20:00	SODIUM	Sodium	Chemistry	139	mmol/L	136	145		139	mmol/L	136	145		Normal				Y		Baseline			139	Normal		02	Entered	58	Male	03NOV15	110	Placebo	>=250 mg/day	Yes	Yes	<250 mg/day	No	Yes	Yes	Yes	Yes
Baseline	02_003	03NOV15	9:20:00	TRIG	Triglycerides	Chemistry	135	mg/dL		150		135	mg/dL		150		Normal				Y		Baseline			135	Normal		02	Entered	58	Male	03NOV15	110	Placebo	>=250 mg/day	Yes	Yes	<250 mg/day	No	Yes	Yes	Yes	Yes
Baseline	02_003	03NOV15	9:20:00	WBC	WBC	Hematology	5.9	K/uL	4	11		5.9	K/uL	4	11		Normal				Y		Baseline			5.9	Normal		02	Entered	58	Male	03NOV15	110	Placebo	>=250 mg/day	Yes	Yes	<250 mg/day	No	Yes	Yes	Yes	Yes
Week 12	02_003	01FEB16	14:25:00	ALP	Alkaline Phosphatase	Liver Function Tests	69	IU/L	32	92		69	IU/L	32	92		Normal				N		Week 12			60	Normal	9	02	Entered	58	Male	03NOV15	110	Placebo	>=250 mg/day	Yes	Yes	<250 mg/day	No	Yes	Yes	Yes	Yes
Week 12	02_003	01FEB16	14:25:00	ALT	ALT	Liver Function Tests	57	IU/L	17	63		57	IU/L	17	63		Normal				N		Week 12			69	High	-12	02	Entered	58	Male	03NOV15	110	Placebo	>=250 mg/day	Yes	Yes	<250 mg/day	No	Yes	Yes	Yes	Yes
Week 12	02_003	01FEB16	14:25:00	AST	AST	Liver Function Tests	33	IU/L	15	41		33	IU/L	15	41		Normal				N		Week 12			40	Normal	-7	02	Entered	58	Male	03NOV15	110	Placebo	>=250 mg/day	Yes	Yes	<250 mg/day	No	Yes	Yes	Yes	Yes
Week 12	02_003	01FEB16	14:25:00	BASO	Abs Basophils	Hematology	0.0	K/uL	0	0.2		0	K/uL	0	0.2		Normal				N		Week 12			0.1	Normal	-0.1	02	Entered	58	Male	03NOV15	110	Placebo	>=250 mg/day	Yes	Yes	<250 mg/day	No	Yes	Yes	Yes	Yes
Week 12	02_003	01FEB16	14:25:00	BASOLE	Basophils	Hematology	0	%	0	2		0	%	0	2		Normal				N		Week 12			1	Normal	-1	02	Entered	58	Male	03NOV15	110	Placebo	>=250 mg/day	Yes	Yes	<250 mg/day	No	Yes	Yes	Yes	Yes
Week 12	02_003	01FEB16	14:25:00	BILIT	Bilirubin Total	Liver Function Tests	0.5	mg/dL	0.3	1.2		0.5	mg/dL	0.3	1.2		Normal				N		Week 12			0.5	Normal	0	02	Entered	58	Male	03NOV15	110	Placebo	>=250 mg/day	Yes	Yes	<250 mg/day	No	Yes	Yes	Yes	Yes
Week 12	02_003	01FEB16	14:25:00	EOS	Abs Eosinophils	Hematology	0.4	K/uL	0	0.6		0.4	K/uL	0	0.6		Normal				N		Week 12			0.2	Normal	0.2	02	Entered	58	Male	03NOV15	110	Placebo	>=250 mg/day	Yes	Yes	<250 mg/day	No	Yes	Yes	Yes	Yes
Week 12	02_003	01FEB16	14:25:00	EOSLE	Eosinophils	Hematology	5	%	0	4		5	%	0	4		High				N		Week 12			4	Normal	1	02	Entered	58	Male	03NOV15	110	Placebo	>=250 mg/day	Yes	Yes	<250 mg/day	No	Yes	Yes	Yes	Yes
Week 12	02_003	01FEB16	14:25:00	GGT	GGT	Liver Function Tests	19	IU/L	7	50		19	IU/L	7	50		Normal				N		Week 12			20	Normal	-1	02	Entered	58	Male	03NOV15	110	Placebo	>=250 mg/day	Yes	Yes	<250 mg/day	No	Yes	Yes	Yes	Yes
Week 12	02_003	01FEB16	14:25:00	HCT	Hematocrit	Hematology	43.1	%	38	53		43.1	%	38	53		Normal				N		Week 12			42.5	Normal	0.6	02	Entered	58	Male	03NOV15	110	Placebo	>=250 mg/day	Yes	Yes	<250 mg/day	No	Yes	Yes	Yes	Yes
Week 12	02_003	01FEB16	14:25:00	HGB	Hemoglobin	Hematology	14.1	g/dL	13.5	17.5		14.1	g/dL	13.5	17.5		Normal				N		Week 12			13.5	Normal	0.6	02	Entered	58	Male	03NOV15	110	Placebo	>=250 mg/day	Yes	Yes	<250 mg/day	No	Yes	Yes	Yes	Yes
Week 12	02_003	01FEB16	14:25:00	LYM	Abs Lymphocytes	Hematology	3.1	K/uL	0.8	4		3.1	K/uL	0.8	4		Normal				N		Week 12			2	Normal	1.1	02	Entered	58	Male	03NOV15	110	Placebo	>=250 mg/day	Yes	Yes	<250 mg/day	No	Yes	Yes	Yes	Yes
Week 12	02_003	01FEB16	14:25:00	LYMLE	Lymphocytes	Hematology	43	%	20	50		43	%	20	50		Normal				N		Week 12			34	Normal	9	02	Entered	58	Male	03NOV15	110	Placebo	>=250 mg/day	Yes	Yes	<250 mg/day	No	Yes	Yes	Yes	Yes
Week 12	02_003	01FEB16	14:25:00	MONO	Abs Monocytes	Hematology	1.0	K/uL	0	0.9		1	K/uL	0	0.9		High				N		Week 12			0.6	Normal	0.4	02	Entered	58	Male	03NOV15	110	Placebo	>=250 mg/day	Yes	Yes	<250 mg/day	No	Yes	Yes	Yes	Yes
Week 12	02_003	01FEB16	14:25:00	MONOLE	Monocytes	Hematology	14	%	1	9		14	%	1	9		High				N		Week 12			10	High	4	02	Entered	58	Male	03NOV15	110	Placebo	>=250 mg/day	Yes	Yes	<250 mg/day	No	Yes	Yes	Yes	Yes
Week 12	02_003	01FEB16	14:25:00	NEUT	Abs Neutrophil	Hematology	2.7	K/uL	1.5	7.7		2.7	K/uL	1.5	7.7		Normal				N		Week 12			3	Normal	-0.3	02	Entered	58	Male	03NOV15	110	Placebo	>=250 mg/day	Yes	Yes	<250 mg/day	No	Yes	Yes	Yes	Yes
Week 12	02_003	01FEB16	14:25:00	NEUTLE	Neutrophils	Hematology	38	%	45	79		38	%	45	79		Low				N		Week 12			51	Normal	-13	02	Entered	58	Male	03NOV15	110	Placebo	>=250 mg/day	Yes	Yes	<250 mg/day	No	Yes	Yes	Yes	Yes
Week 12	02_003	01FEB16	14:25:00	PLAT	Platelet Count	Hematology	238	K/uL	150	450		238	K/uL	150	450		Normal				N		Week 12			273	Normal	-35	02	Entered	58	Male	03NOV15	110	Placebo	>=250 mg/day	Yes	Yes	<250 mg/day	No	Yes	Yes	Yes	Yes
Week 12	02_003	01FEB16	14:25:00	RBC	RBC	Hematology	4.76	M/uL	4.3	5.8		4.76	M/uL	4.3	5.8		Normal				N		Week 12			4.66	Normal	0.1	02	Entered	58	Male	03NOV15	110	Placebo	>=250 mg/day	Yes	Yes	<250 mg/day	No	Yes	Yes	Yes	Yes
Week 12	02_003	01FEB16	14:25:00	WBC	WBC	Hematology	7.1	K/uL	4	11		7.1	K/uL	4	11		Normal				N		Week 12			5.9	Normal	1.2	02	Entered	58	Male	03NOV15	110	Placebo	>=250 mg/day	Yes	Yes	<250 mg/day	No	Yes	Yes	Yes	Yes
Week 24	02_003	18APR16	10:10:00	ALB	Albumin	Chemistry	4.2	g/dL	3.5	5.2		4.2	g/dL	3.5	5.2		Normal				Y		Week 24			4.6	Normal	-0.4	02	Entered	58	Male	03NOV15	110	Placebo	>=250 mg/day	Yes	Yes	<250 mg/day	No	Yes	Yes	Yes	Yes
Week 24	02_003	18APR16	10:10:00	ALP	Alkaline Phosphatase	Liver Function Tests	60	IU/L	32	92		60	IU/L	32	92		Normal				Y		Week 24			60	Normal	0	02	Entered	58	Male	03NOV15	110	Placebo	>=250 mg/day	Yes	Yes	<250 mg/day	No	Yes	Yes	Yes	Yes
Week 24	02_003	18APR16	10:10:00	ALT	ALT	Liver Function Tests	59	IU/L	17	63		59	IU/L	17	63		Normal				Y		Week 24			69	High	-10	02	Entered	58	Male	03NOV15	110	Placebo	>=250 mg/day	Yes	Yes	<250 mg/day	No	Yes	Yes	Yes	Yes
Week 24	02_003	18APR16	10:10:00	AST	AST	Liver Function Tests	33	IU/L	15	41		33	IU/L	15	41		Normal				Y		Week 24			40	Normal	-7	02	Entered	58	Male	03NOV15	110	Placebo	>=250 mg/day	Yes	Yes	<250 mg/day	No	Yes	Yes	Yes	Yes
Week 24	02_003	18APR16	10:10:00	BASO	Abs Basophils	Hematology	0.1	K/uL	0	0.2		0.1	K/uL	0	0.2		Normal				Y		Week 24			0.1	Normal	0	02	Entered	58	Male	03NOV15	110	Placebo	>=250 mg/day	Yes	Yes	<250 mg/day	No	Yes	Yes	Yes	Yes
Week 24	02_003	18APR16	10:10:00	BASOLE	Basophils	Hematology	1	%	0	2		1	%	0	2		Normal				Y		Week 24			1	Normal	0	02	Entered	58	Male	03NOV15	110	Placebo	>=250 mg/day	Yes	Yes	<250 mg/day	No	Yes	Yes	Yes	Yes
Week 24	02_003	18APR16	10:10:00	BICARB	BiCarbonate (CO2)	Chemistry	27	mmol/L	22	32		27	mmol/L	22	32		Normal				Y		Week 24			24	Normal	3	02	Entered	58	Male	03NOV15	110	Placebo	>=250 mg/day	Yes	Yes	<250 mg/day	No	Yes	Yes	Yes	Yes
Week 24	02_003	18APR16	10:10:00	BILIT	Bilirubin Total	Liver Function Tests	0.6	mg/dL	0.3	1.2		0.6	mg/dL	0.3	1.2		Normal				Y		Week 24			0.5	Normal	0.1	02	Entered	58	Male	03NOV15	110	Placebo	>=250 mg/day	Yes	Yes	<250 mg/day	No	Yes	Yes	Yes	Yes
Week 24	02_003	18APR16	10:10:00	BUN	BUN (urea)	Chemistry	17	mg/dL	6	20		17	mg/dL	6	20		Normal				Y		Week 24			15	Normal	2	02	Entered	58	Male	03NOV15	110	Placebo	>=250 mg/day	Yes	Yes	<250 mg/day	No	Yes	Yes	Yes	Yes
Week 24	02_003	18APR16	10:10:00	CA	Calcium	Chemistry	9.5	mg/dL	8.6	10		9.5	mg/dL	8.6	10		Normal				Y		Week 24			9.5	Normal	0	02	Entered	58	Male	03NOV15	110	Placebo	>=250 mg/day	Yes	Yes	<250 mg/day	No	Yes	Yes	Yes	Yes
Week 24	02_003	18APR16	10:10:00	CL	Chloride	Chemistry	104	mmol/L	98	107		104	mmol/L	98	107		Normal				Y		Week 24			101	Normal	3	02	Entered	58	Male	03NOV15	110	Placebo	>=250 mg/day	Yes	Yes	<250 mg/day	No	Yes	Yes	Yes	Yes
Week 24	02_003	18APR16	10:10:00	CREAT	Creatinine	Chemistry	1.1	mg/dL	0.9	1.3		1.1	mg/dL	0.9	1.3		Normal				Y		Week 24			1.1	Normal	0	02	Entered	58	Male	03NOV15	110	Placebo	>=250 mg/day	Yes	Yes	<250 mg/day	No	Yes	Yes	Yes	Yes
Week 24	02_003	18APR16	10:10:00	CRPHS	hs-CRP	hs-CRP	0.43	mg/L				0.43	mg/L				Normal				Y	hs-CRP CHD risk level: low risk <1.0 mg/L intermediate risk 1.0-3.0 mg/L high risk >3.0 mg/L Values >10 mg/L suggests an inflammatory disorder requiring separate evaluation. Cardiac risk assessment is not appropriate in this context.	Week 24			0.52	Normal	-0.09	02	Entered	58	Male	03NOV15	110	Placebo	>=250 mg/day	Yes	Yes	<250 mg/day	No	Yes	Yes	Yes	Yes
Week 24	02_003	18APR16	10:10:00	EOS	Abs Eosinophils	Hematology	0.3	K/uL	0	0.6		0.3	K/uL	0	0.6		Normal				Y		Week 24			0.2	Normal	0.1	02	Entered	58	Male	03NOV15	110	Placebo	>=250 mg/day	Yes	Yes	<250 mg/day	No	Yes	Yes	Yes	Yes
Week 24	02_003	18APR16	10:10:00	EOSLE	Eosinophils	Hematology	4	%	0	4		4	%	0	4		Normal				Y		Week 24			4	Normal	0	02	Entered	58	Male	03NOV15	110	Placebo	>=250 mg/day	Yes	Yes	<250 mg/day	No	Yes	Yes	Yes	Yes
Week 24	02_003	18APR16	10:10:00	GGT	GGT	Liver Function Tests	21	IU/L	7	50		21	IU/L	7	50		Normal				Y		Week 24			20	Normal	1	02	Entered	58	Male	03NOV15	110	Placebo	>=250 mg/day	Yes	Yes	<250 mg/day	No	Yes	Yes	Yes	Yes
Week 24	02_003	18APR16	10:10:00	GLUCF	Glucose Fasting	Chemistry	115	mg/dL	70	99		115	mg/dL	70	99		High				Y		Week 24			105	High	10	02	Entered	58	Male	03NOV15	110	Placebo	>=250 mg/day	Yes	Yes	<250 mg/day	No	Yes	Yes	Yes	Yes
Week 24	02_003	18APR16	10:10:00	HBA1C	HbA1c	HbA1c	6.6	%	4	5.6		6.6	%	4	5.6		High				Y	INTERPRETIVE INFORMATION: Hemoglobin A1cHemoglobin A1c values of 5.7-6.4 percent indicate an increasedrisk for developing diabetes mellitus. Hemoglobin A1c valuesgreater than or equal to 6.5 percent are diagnostic of diabetesmellitus. Diagnosis should be confirmed by repeating the Hb A1ctest.This boronate affinity Hb A1c method provides accurate analyticalresults in the presence of nearly all hem…	Week 24			6.1	High	0.5	02	Entered	58	Male	03NOV15	110	Placebo	>=250 mg/day	Yes	Yes	<250 mg/day	No	Yes	Yes	Yes	Yes
Week 24	02_003	18APR16	10:10:00	HCT	Hematocrit	Hematology	43.7	%	38	53		43.7	%	38	53		Normal				Y		Week 24			42.5	Normal	1.2	02	Entered	58	Male	03NOV15	110	Placebo	>=250 mg/day	Yes	Yes	<250 mg/day	No	Yes	Yes	Yes	Yes
Week 24	02_003	18APR16	10:10:00	HGB	Hemoglobin	Hematology	14.4	g/dL	13.5	17.5		14.4	g/dL	13.5	17.5		Normal				Y		Week 24			13.5	Normal	0.9	02	Entered	58	Male	03NOV15	110	Placebo	>=250 mg/day	Yes	Yes	<250 mg/day	No	Yes	Yes	Yes	Yes
Week 24	02_003	18APR16	10:10:00	INSULIN	Insulin	Insulin	23.9	uIU/mL	1.9	23		23.9	uIU/mL	1.9	23		High				Y		Week 24			17.8	Normal	6.1	02	Entered	58	Male	03NOV15	110	Placebo	>=250 mg/day	Yes	Yes	<250 mg/day	No	Yes	Yes	Yes	Yes
Week 24	02_003	18APR16	10:10:00	K	Potassium	Chemistry	4.1	mmol/L	3.5	5.1		4.1	mmol/L	3.5	5.1		Normal				Y		Week 24			4	Normal	0.1	02	Entered	58	Male	03NOV15	110	Placebo	>=250 mg/day	Yes	Yes	<250 mg/day	No	Yes	Yes	Yes	Yes
Week 24	02_003	18APR16	10:10:00	LYM	Abs Lymphocytes	Hematology	1.7	K/uL	0.8	4		1.7	K/uL	0.8	4		Normal				Y		Week 24			2	Normal	-0.3	02	Entered	58	Male	03NOV15	110	Placebo	>=250 mg/day	Yes	Yes	<250 mg/day	No	Yes	Yes	Yes	Yes
Week 24	02_003	18APR16	10:10:00	LYMLE	Lymphocytes	Hematology	25	%	20	50		25	%	20	50		Normal				Y		Week 24			34	Normal	-9	02	Entered	58	Male	03NOV15	110	Placebo	>=250 mg/day	Yes	Yes	<250 mg/day	No	Yes	Yes	Yes	Yes
Week 24	02_003	18APR16	10:10:00	MONO	Abs Monocytes	Hematology	0.5	K/uL	0	0.9		0.5	K/uL	0	0.9		Normal				Y		Week 24			0.6	Normal	-0.1	02	Entered	58	Male	03NOV15	110	Placebo	>=250 mg/day	Yes	Yes	<250 mg/day	No	Yes	Yes	Yes	Yes
Week 24	02_003	18APR16	10:10:00	MONOLE	Monocytes	Hematology	8	%	1	9		8	%	1	9		Normal				Y		Week 24			10	High	-2	02	Entered	58	Male	03NOV15	110	Placebo	>=250 mg/day	Yes	Yes	<250 mg/day	No	Yes	Yes	Yes	Yes
Week 24	02_003	18APR16	10:10:00	NEUT	Abs Neutrophil	Hematology	4.2	K/uL	1.5	7.7		4.2	K/uL	1.5	7.7		Normal				Y		Week 24			3	Normal	1.2	02	Entered	58	Male	03NOV15	110	Placebo	>=250 mg/day	Yes	Yes	<250 mg/day	No	Yes	Yes	Yes	Yes
Week 24	02_003	18APR16	10:10:00	NEUTLE	Neutrophils	Hematology	62	%	45	79		62	%	45	79		Normal				Y		Week 24			51	Normal	11	02	Entered	58	Male	03NOV15	110	Placebo	>=250 mg/day	Yes	Yes	<250 mg/day	No	Yes	Yes	Yes	Yes
Week 24	02_003	18APR16	10:10:00	PLAT	Platelet Count	Hematology	235	K/uL	150	450		235	K/uL	150	450		Normal				Y		Week 24			273	Normal	-38	02	Entered	58	Male	03NOV15	110	Placebo	>=250 mg/day	Yes	Yes	<250 mg/day	No	Yes	Yes	Yes	Yes
Week 24	02_003	18APR16	10:10:00	RBC	RBC	Hematology	4.86	M/uL	4.3	5.8		4.86	M/uL	4.3	5.8		Normal				Y		Week 24			4.66	Normal	0.2	02	Entered	58	Male	03NOV15	110	Placebo	>=250 mg/day	Yes	Yes	<250 mg/day	No	Yes	Yes	Yes	Yes
Week 24	02_003	18APR16	10:10:00	SODIUM	Sodium	Chemistry	140	mmol/L	136	145		140	mmol/L	136	145		Normal				Y		Week 24			139	Normal	1	02	Entered	58	Male	03NOV15	110	Placebo	>=250 mg/day	Yes	Yes	<250 mg/day	No	Yes	Yes	Yes	Yes
Week 24	02_003	18APR16	10:10:00	TRIG	Triglycerides	Chemistry	137	mg/dL		150		137	mg/dL		150		Normal				Y		Week 24			135	Normal	2	02	Entered	58	Male	03NOV15	110	Placebo	>=250 mg/day	Yes	Yes	<250 mg/day	No	Yes	Yes	Yes	Yes
Week 24	02_003	18APR16	10:10:00	TSH	TSH	TSH	1.97	uIU/mL	0.34	5.6		1.97	uIU/mL	0.34	5.6		Normal				Y		Week 24			2.35	Normal	-0.38	02	Entered	58	Male	03NOV15	110	Placebo	>=250 mg/day	Yes	Yes	<250 mg/day	No	Yes	Yes	Yes	Yes
Week 24	02_003	18APR16	10:10:00	WBC	WBC	Hematology	6.8	K/uL	4	11		6.8	K/uL	4	11		Normal				Y		Week 24			5.9	Normal	0.9	02	Entered	58	Male	03NOV15	110	Placebo	>=250 mg/day	Yes	Yes	<250 mg/day	No	Yes	Yes	Yes	Yes
Screening	02_004	26OCT15	12:30:00	ALP	Alkaline Phosphatase	Liver Function Tests	68	IU/L	32	92		68	IU/L	32	92		Normal				N		Screening			56	Normal		02	Early Termination	60	Female	12NOV15	111	Placebo	<250 mg/day	Yes	Yes	<250 mg/day	No	Yes	Yes	Yes	Yes
Screening	02_004	26OCT15	12:30:00	ALT	ALT	Liver Function Tests	18	IU/L	14	54		18	IU/L	14	54		Normal				N		Screening			21	Normal		02	Early Termination	60	Female	12NOV15	111	Placebo	<250 mg/day	Yes	Yes	<250 mg/day	No	Yes	Yes	Yes	Yes
Screening	02_004	26OCT15	12:30:00	AST	AST	Liver Function Tests	15	IU/L	15	41		15	IU/L	15	41		Normal				N		Screening			15	Normal		02	Early Termination	60	Female	12NOV15	111	Placebo	<250 mg/day	Yes	Yes	<250 mg/day	No	Yes	Yes	Yes	Yes
Screening	02_004	26OCT15	12:30:00	BILIT	Bilirubin Total	Liver Function Tests	0.5	mg/dL	0.2	1.1		0.5	mg/dL	0.2	1.1		Normal				N		Screening			0.5	Normal		02	Early Termination	60	Female	12NOV15	111	Placebo	<250 mg/day	Yes	Yes	<250 mg/day	No	Yes	Yes	Yes	Yes
Screening	02_004	26OCT15	12:30:00	GGT	GGT	Liver Function Tests	23	IU/L	7	50		23	IU/L	7	50		Normal				N		Screening			20	Normal		02	Early Termination	60	Female	12NOV15	111	Placebo	<250 mg/day	Yes	Yes	<250 mg/day	No	Yes	Yes	Yes	Yes
Screening	02_004	26OCT15	12:30:00	HBA1C	HbA1c	HbA1c	6.1	%	4	5.6		6.1	%	4	5.6		High				N	INTERPRETIVE INFORMATION: Hemoglobin A1cHemoglobin A1c values of 5.7-6.4 percent indicate an increasedrisk for developing diabetes mellitus. Hemoglobin A1c valuesgreater than or equal to 6.5 percent are diagnostic of diabetesmellitus. Diagnosis should be confirmed by repeating the Hb A1ctest.This boronate affinity Hb A1c method provides accurate analyticalresults in the presence of nearly all hem…	Screening			6.1	High		02	Early Termination	60	Female	12NOV15	111	Placebo	<250 mg/day	Yes	Yes	<250 mg/day	No	Yes	Yes	Yes	Yes
Screening	02_004	26OCT15	12:30:00	HCAB	Hepatitis C Antibody	Hepatitis C Antibody	NONREACT				NONREACT					NONREACT					N		Screening						02	Early Termination	60	Female	12NOV15	111	Placebo	<250 mg/day	Yes	Yes	<250 mg/day	No	Yes	Yes	Yes	Yes
Screening	02_004	26OCT15	12:30:00	TSH	TSH	TSH	2.32	uIU/mL	0.34	5.6		2.32	uIU/mL	0.34	5.6		Normal				N		Screening			2.32	Normal		02	Early Termination	60	Female	12NOV15	111	Placebo	<250 mg/day	Yes	Yes	<250 mg/day	No	Yes	Yes	Yes	Yes
Baseline	02_004	11NOV15	9:30:00	ALB	Albumin	Chemistry	4.4	g/dL	3.2	4.6		4.4	g/dL	3.2	4.6		Normal				Y		Baseline			4.4	Normal		02	Early Termination	60	Female	12NOV15	111	Placebo	<250 mg/day	Yes	Yes	<250 mg/day	No	Yes	Yes	Yes	Yes
Baseline	02_004	11NOV15	9:30:00	ALP	Alkaline Phosphatase	Liver Function Tests	56	IU/L	32	92		56	IU/L	32	92		Normal				Y		Baseline			56	Normal		02	Early Termination	60	Female	12NOV15	111	Placebo	<250 mg/day	Yes	Yes	<250 mg/day	No	Yes	Yes	Yes	Yes
Baseline	02_004	11NOV15	9:30:00	ALT	ALT	Liver Function Tests	21	IU/L	14	54		21	IU/L	14	54		Normal				Y		Baseline			21	Normal		02	Early Termination	60	Female	12NOV15	111	Placebo	<250 mg/day	Yes	Yes	<250 mg/day	No	Yes	Yes	Yes	Yes
Baseline	02_004	11NOV15	9:30:00	AST	AST	Liver Function Tests	15	IU/L	15	41		15	IU/L	15	41		Normal				Y		Baseline			15	Normal		02	Early Termination	60	Female	12NOV15	111	Placebo	<250 mg/day	Yes	Yes	<250 mg/day	No	Yes	Yes	Yes	Yes
Baseline	02_004	11NOV15	9:30:00	BASO	Abs Basophils	Hematology	0.1	K/uL	0	0.2		0.1	K/uL	0	0.2		Normal				Y		Baseline			0.1	Normal		02	Early Termination	60	Female	12NOV15	111	Placebo	<250 mg/day	Yes	Yes	<250 mg/day	No	Yes	Yes	Yes	Yes
Baseline	02_004	11NOV15	9:30:00	BASOLE	Basophils	Hematology	1	%	0	2		1	%	0	2		Normal				Y		Baseline			1	Normal		02	Early Termination	60	Female	12NOV15	111	Placebo	<250 mg/day	Yes	Yes	<250 mg/day	No	Yes	Yes	Yes	Yes
Baseline	02_004	11NOV15	9:30:00	BICARB	BiCarbonate (CO2)	Chemistry	28	mmol/L	22	32		28	mmol/L	22	32		Normal				Y		Baseline			28	Normal		02	Early Termination	60	Female	12NOV15	111	Placebo	<250 mg/day	Yes	Yes	<250 mg/day	No	Yes	Yes	Yes	Yes
Baseline	02_004	11NOV15	9:30:00	BILIT	Bilirubin Total	Liver Function Tests	0.5	mg/dL	0.2	1.1		0.5	mg/dL	0.2	1.1		Normal				Y		Baseline			0.5	Normal		02	Early Termination	60	Female	12NOV15	111	Placebo	<250 mg/day	Yes	Yes	<250 mg/day	No	Yes	Yes	Yes	Yes
Baseline	02_004	11NOV15	9:30:00	BUN	BUN (urea)	Chemistry	19	mg/dL	8	23		19	mg/dL	8	23		Normal				Y		Baseline			19	Normal		02	Early Termination	60	Female	12NOV15	111	Placebo	<250 mg/day	Yes	Yes	<250 mg/day	No	Yes	Yes	Yes	Yes
Baseline	02_004	11NOV15	9:30:00	CA	Calcium	Chemistry	9.7	mg/dL	8.8	10.2		9.7	mg/dL	8.8	10.2		Normal				Y		Baseline			9.7	Normal		02	Early Termination	60	Female	12NOV15	111	Placebo	<250 mg/day	Yes	Yes	<250 mg/day	No	Yes	Yes	Yes	Yes
Baseline	02_004	11NOV15	9:30:00	CL	Chloride	Chemistry	101	mmol/L	98	107		101	mmol/L	98	107		Normal				Y		Baseline			101	Normal		02	Early Termination	60	Female	12NOV15	111	Placebo	<250 mg/day	Yes	Yes	<250 mg/day	No	Yes	Yes	Yes	Yes
Baseline	02_004	11NOV15	9:30:00	CREAT	Creatinine	Chemistry	0.9	mg/dL	0.6	1.2		0.9	mg/dL	0.6	1.2		Normal				Y		Baseline			0.9	Normal		02	Early Termination	60	Female	12NOV15	111	Placebo	<250 mg/day	Yes	Yes	<250 mg/day	No	Yes	Yes	Yes	Yes
Baseline	02_004	11NOV15	9:30:00	CRPHS	hs-CRP	hs-CRP	0.94	mg/L				0.94	mg/L				Normal				Y	hs-CRP CHD risk level: low risk <1.0 mg/L intermediate risk 1.0-3.0 mg/L high risk >3.0 mg/L Values >10 mg/L suggests an inflammatory disorder requiring separate evaluation. Cardiac risk assessment is not appropriate in this context.	Baseline			0.94	Normal		02	Early Termination	60	Female	12NOV15	111	Placebo	<250 mg/day	Yes	Yes	<250 mg/day	No	Yes	Yes	Yes	Yes
Baseline	02_004	11NOV15	9:30:00	EOS	Abs Eosinophils	Hematology	0.2	K/uL	0	0.6		0.2	K/uL	0	0.6		Normal				Y		Baseline			0.2	Normal		02	Early Termination	60	Female	12NOV15	111	Placebo	<250 mg/day	Yes	Yes	<250 mg/day	No	Yes	Yes	Yes	Yes
Baseline	02_004	11NOV15	9:30:00	EOSLE	Eosinophils	Hematology	3	%	0	4		3	%	0	4		Normal				Y		Baseline			3	Normal		02	Early Termination	60	Female	12NOV15	111	Placebo	<250 mg/day	Yes	Yes	<250 mg/day	No	Yes	Yes	Yes	Yes
Baseline	02_004	11NOV15	9:30:00	GGT	GGT	Liver Function Tests	20	IU/L	7	50		20	IU/L	7	50		Normal				Y		Baseline			20	Normal		02	Early Termination	60	Female	12NOV15	111	Placebo	<250 mg/day	Yes	Yes	<250 mg/day	No	Yes	Yes	Yes	Yes
Baseline	02_004	11NOV15	9:30:00	GLUCF	Glucose Fasting	Chemistry	131	mg/dL	70	99		131	mg/dL	70	99		High				Y		Baseline			131	High		02	Early Termination	60	Female	12NOV15	111	Placebo	<250 mg/day	Yes	Yes	<250 mg/day	No	Yes	Yes	Yes	Yes
Baseline	02_004	11NOV15	9:30:00	HCT	Hematocrit	Hematology	38.8	%	36	46		38.8	%	36	46		Normal				Y		Baseline			38.8	Normal		02	Early Termination	60	Female	12NOV15	111	Placebo	<250 mg/day	Yes	Yes	<250 mg/day	No	Yes	Yes	Yes	Yes
Baseline	02_004	11NOV15	9:30:00	HGB	Hemoglobin	Hematology	12.5	g/dL	12	15.5		12.5	g/dL	12	15.5		Normal				Y		Baseline			12.5	Normal		02	Early Termination	60	Female	12NOV15	111	Placebo	<250 mg/day	Yes	Yes	<250 mg/day	No	Yes	Yes	Yes	Yes
Baseline	02_004	11NOV15	9:30:00	INSULIN	Insulin	Insulin	14.2	uIU/mL	1.9	23		14.2	uIU/mL	1.9	23		Normal				Y		Baseline			14.2	Normal		02	Early Termination	60	Female	12NOV15	111	Placebo	<250 mg/day	Yes	Yes	<250 mg/day	No	Yes	Yes	Yes	Yes
Baseline	02_004	11NOV15	9:30:00	K	Potassium	Chemistry	4.0	mmol/L	3.5	5.1		4	mmol/L	3.5	5.1		Normal				Y		Baseline			4	Normal		02	Early Termination	60	Female	12NOV15	111	Placebo	<250 mg/day	Yes	Yes	<250 mg/day	No	Yes	Yes	Yes	Yes
Baseline	02_004	11NOV15	9:30:00	LYM	Abs Lymphocytes	Hematology	1.9	K/uL	0.8	4		1.9	K/uL	0.8	4		Normal				Y		Baseline			1.9	Normal		02	Early Termination	60	Female	12NOV15	111	Placebo	<250 mg/day	Yes	Yes	<250 mg/day	No	Yes	Yes	Yes	Yes
Baseline	02_004	11NOV15	9:30:00	LYMLE	Lymphocytes	Hematology	25	%	20	50		25	%	20	50		Normal				Y		Baseline			25	Normal		02	Early Termination	60	Female	12NOV15	111	Placebo	<250 mg/day	Yes	Yes	<250 mg/day	No	Yes	Yes	Yes	Yes
Baseline	02_004	11NOV15	9:30:00	MONO	Abs Monocytes	Hematology	0.6	K/uL	0	0.9		0.6	K/uL	0	0.9		Normal				Y		Baseline			0.6	Normal		02	Early Termination	60	Female	12NOV15	111	Placebo	<250 mg/day	Yes	Yes	<250 mg/day	No	Yes	Yes	Yes	Yes
Baseline	02_004	11NOV15	9:30:00	MONOLE	Monocytes	Hematology	8	%	1	9		8	%	1	9		Normal				Y		Baseline			8	Normal		02	Early Termination	60	Female	12NOV15	111	Placebo	<250 mg/day	Yes	Yes	<250 mg/day	No	Yes	Yes	Yes	Yes
Baseline	02_004	11NOV15	9:30:00	NEUT	Abs Neutrophil	Hematology	4.7	K/uL	1.5	7.7		4.7	K/uL	1.5	7.7		Normal				Y		Baseline			4.7	Normal		02	Early Termination	60	Female	12NOV15	111	Placebo	<250 mg/day	Yes	Yes	<250 mg/day	No	Yes	Yes	Yes	Yes
Baseline	02_004	11NOV15	9:30:00	NEUTLE	Neutrophils	Hematology	62	%	45	79		62	%	45	79		Normal				Y		Baseline			62	Normal		02	Early Termination	60	Female	12NOV15	111	Placebo	<250 mg/day	Yes	Yes	<250 mg/day	No	Yes	Yes	Yes	Yes
Baseline	02_004	11NOV15	9:30:00	PLAT	Platelet Count	Hematology	261	K/uL	150	450		261	K/uL	150	450		Normal				Y		Baseline			261	Normal		02	Early Termination	60	Female	12NOV15	111	Placebo	<250 mg/day	Yes	Yes	<250 mg/day	No	Yes	Yes	Yes	Yes
Baseline	02_004	11NOV15	9:30:00	RBC	RBC	Hematology	4.02	M/uL	3.7	5.2		4.02	M/uL	3.7	5.2		Normal				Y		Baseline			4.02	Normal		02	Early Termination	60	Female	12NOV15	111	Placebo	<250 mg/day	Yes	Yes	<250 mg/day	No	Yes	Yes	Yes	Yes
Baseline	02_004	11NOV15	9:30:00	SODIUM	Sodium	Chemistry	139	mmol/L	136	145		139	mmol/L	136	145		Normal				Y		Baseline			139	Normal		02	Early Termination	60	Female	12NOV15	111	Placebo	<250 mg/day	Yes	Yes	<250 mg/day	No	Yes	Yes	Yes	Yes
Baseline	02_004	11NOV15	9:30:00	TRIG	Triglycerides	Chemistry	156	mg/dL		150		156	mg/dL		150		High				Y		Baseline			156	High		02	Early Termination	60	Female	12NOV15	111	Placebo	<250 mg/day	Yes	Yes	<250 mg/day	No	Yes	Yes	Yes	Yes
Baseline	02_004	11NOV15	9:30:00	WBC	WBC	Hematology	7.5	K/uL	4	11		7.5	K/uL	4	11		Normal				Y		Baseline			7.5	Normal		02	Early Termination	60	Female	12NOV15	111	Placebo	<250 mg/day	Yes	Yes	<250 mg/day	No	Yes	Yes	Yes	Yes
Week 12	02_004	03FEB16	16:15:00	ALP	Alkaline Phosphatase	Liver Function Tests	69	IU/L	32	92		69	IU/L	32	92		Normal				N		Week 12			56	Normal	13	02	Early Termination	60	Female	12NOV15	111	Placebo	<250 mg/day	Yes	Yes	<250 mg/day	No	Yes	Yes	Yes	Yes
Week 12	02_004	03FEB16	16:15:00	ALT	ALT	Liver Function Tests	14	IU/L	14	54		14	IU/L	14	54		Normal				N		Week 12			21	Normal	-7	02	Early Termination	60	Female	12NOV15	111	Placebo	<250 mg/day	Yes	Yes	<250 mg/day	No	Yes	Yes	Yes	Yes
Week 12	02_004	03FEB16	16:15:00	AST	AST	Liver Function Tests	14	IU/L	15	41		14	IU/L	15	41		Low				N		Week 12			15	Normal	-1	02	Early Termination	60	Female	12NOV15	111	Placebo	<250 mg/day	Yes	Yes	<250 mg/day	No	Yes	Yes	Yes	Yes
Week 12	02_004	03FEB16	16:15:00	BASO	Abs Basophils	Hematology	0.1	K/uL	0	0.2		0.1	K/uL	0	0.2		Normal				N		Week 12			0.1	Normal	0	02	Early Termination	60	Female	12NOV15	111	Placebo	<250 mg/day	Yes	Yes	<250 mg/day	No	Yes	Yes	Yes	Yes
Week 12	02_004	03FEB16	16:15:00	BASOLE	Basophils	Hematology	2	%	0	2		2	%	0	2		Normal				N		Week 12			1	Normal	1	02	Early Termination	60	Female	12NOV15	111	Placebo	<250 mg/day	Yes	Yes	<250 mg/day	No	Yes	Yes	Yes	Yes
Week 12	02_004	03FEB16	16:15:00	BILIT	Bilirubin Total	Liver Function Tests	0.3	mg/dL	0.2	1.1		0.3	mg/dL	0.2	1.1		Normal				N		Week 12			0.5	Normal	-0.2	02	Early Termination	60	Female	12NOV15	111	Placebo	<250 mg/day	Yes	Yes	<250 mg/day	No	Yes	Yes	Yes	Yes
Week 12	02_004	03FEB16	16:15:00	EOS	Abs Eosinophils	Hematology	0.3	K/uL	0	0.6		0.3	K/uL	0	0.6		Normal				N		Week 12			0.2	Normal	0.1	02	Early Termination	60	Female	12NOV15	111	Placebo	<250 mg/day	Yes	Yes	<250 mg/day	No	Yes	Yes	Yes	Yes
Week 12	02_004	03FEB16	16:15:00	EOSLE	Eosinophils	Hematology	7	%	0	4		7	%	0	4		High				N		Week 12			3	Normal	4	02	Early Termination	60	Female	12NOV15	111	Placebo	<250 mg/day	Yes	Yes	<250 mg/day	No	Yes	Yes	Yes	Yes
Week 12	02_004	03FEB16	16:15:00	GGT	GGT	Liver Function Tests	19	IU/L	7	50		19	IU/L	7	50		Normal				N		Week 12			20	Normal	-1	02	Early Termination	60	Female	12NOV15	111	Placebo	<250 mg/day	Yes	Yes	<250 mg/day	No	Yes	Yes	Yes	Yes
Week 12	02_004	03FEB16	16:15:00	HCT	Hematocrit	Hematology	39.7	%	36	46		39.7	%	36	46		Normal				N		Week 12			38.8	Normal	0.9	02	Early Termination	60	Female	12NOV15	111	Placebo	<250 mg/day	Yes	Yes	<250 mg/day	No	Yes	Yes	Yes	Yes
Week 12	02_004	03FEB16	16:15:00	HGB	Hemoglobin	Hematology	13.1	g/dL	12	15.5		13.1	g/dL	12	15.5		Normal				N		Week 12			12.5	Normal	0.6	02	Early Termination	60	Female	12NOV15	111	Placebo	<250 mg/day	Yes	Yes	<250 mg/day	No	Yes	Yes	Yes	Yes
Week 12	02_004	03FEB16	16:15:00	LYM	Abs Lymphocytes	Hematology	2.3	K/uL	0.8	4		2.3	K/uL	0.8	4		Normal				N		Week 12			1.9	Normal	0.4	02	Early Termination	60	Female	12NOV15	111	Placebo	<250 mg/day	Yes	Yes	<250 mg/day	No	Yes	Yes	Yes	Yes
Week 12	02_004	03FEB16	16:15:00	LYMLE	Lymphocytes	Hematology	52	%	20	50		52	%	20	50		High				N		Week 12			25	Normal	27	02	Early Termination	60	Female	12NOV15	111	Placebo	<250 mg/day	Yes	Yes	<250 mg/day	No	Yes	Yes	Yes	Yes
Week 12	02_004	03FEB16	16:15:00	MONO	Abs Monocytes	Hematology	0.8	K/uL	0	0.9		0.8	K/uL	0	0.9		Normal				N		Week 12			0.6	Normal	0.2	02	Early Termination	60	Female	12NOV15	111	Placebo	<250 mg/day	Yes	Yes	<250 mg/day	No	Yes	Yes	Yes	Yes
Week 12	02_004	03FEB16	16:15:00	MONOLE	Monocytes	Hematology	17	%	1	9		17	%	1	9		High				N		Week 12			8	Normal	9	02	Early Termination	60	Female	12NOV15	111	Placebo	<250 mg/day	Yes	Yes	<250 mg/day	No	Yes	Yes	Yes	Yes
Week 12	02_004	03FEB16	16:15:00	NEUT	Abs Neutrophil	Hematology	1.0	K/uL	1.5	7.7		1	K/uL	1.5	7.7		Low				N		Week 12			4.7	Normal	-3.7	02	Early Termination	60	Female	12NOV15	111	Placebo	<250 mg/day	Yes	Yes	<250 mg/day	No	Yes	Yes	Yes	Yes
Week 12	02_004	03FEB16	16:15:00	NEUTLE	Neutrophils	Hematology	23	%	45	79		23	%	45	79		Low				N		Week 12			62	Normal	-39	02	Early Termination	60	Female	12NOV15	111	Placebo	<250 mg/day	Yes	Yes	<250 mg/day	No	Yes	Yes	Yes	Yes
Week 12	02_004	03FEB16	16:15:00	PLAT	Platelet Count	Hematology	340	K/uL	150	450		340	K/uL	150	450		Normal				N		Week 12			261	Normal	79	02	Early Termination	60	Female	12NOV15	111	Placebo	<250 mg/day	Yes	Yes	<250 mg/day	No	Yes	Yes	Yes	Yes
Week 12	02_004	03FEB16	16:15:00	RBC	RBC	Hematology	4.16	M/uL	3.7	5.2		4.16	M/uL	3.7	5.2		Normal				N		Week 12			4.02	Normal	0.14	02	Early Termination	60	Female	12NOV15	111	Placebo	<250 mg/day	Yes	Yes	<250 mg/day	No	Yes	Yes	Yes	Yes
Week 12	02_004	03FEB16	16:15:00	WBC	WBC	Hematology	4.5	K/uL	4	11		4.5	K/uL	4	11		Normal				N		Week 12			7.5	Normal	-3	02	Early Termination	60	Female	12NOV15	111	Placebo	<250 mg/day	Yes	Yes	<250 mg/day	No	Yes	Yes	Yes	Yes
Week 24	02_004	01APR16	9:15:00	ALB	Albumin	Chemistry	4.4	g/dL	3.2	4.6		4.4	g/dL	3.2	4.6		Normal				Y		Week 24			4.4	Normal	0	02	Early Termination	60	Female	12NOV15	111	Placebo	<250 mg/day	Yes	Yes	<250 mg/day	No	Yes	Yes	Yes	Yes
Week 24	02_004	01APR16	9:15:00	ALP	Alkaline Phosphatase	Liver Function Tests	66	IU/L	32	92		66	IU/L	32	92		Normal				Y		Week 24			56	Normal	10	02	Early Termination	60	Female	12NOV15	111	Placebo	<250 mg/day	Yes	Yes	<250 mg/day	No	Yes	Yes	Yes	Yes
Week 24	02_004	01APR16	9:15:00	ALT	ALT	Liver Function Tests	18	IU/L	14	54		18	IU/L	14	54		Normal				Y		Week 24			21	Normal	-3	02	Early Termination	60	Female	12NOV15	111	Placebo	<250 mg/day	Yes	Yes	<250 mg/day	No	Yes	Yes	Yes	Yes
Week 24	02_004	01APR16	9:15:00	AST	AST	Liver Function Tests	15	IU/L	15	41		15	IU/L	15	41		Normal				Y		Week 24			15	Normal	0	02	Early Termination	60	Female	12NOV15	111	Placebo	<250 mg/day	Yes	Yes	<250 mg/day	No	Yes	Yes	Yes	Yes
Week 24	02_004	01APR16	9:15:00	BASO	Abs Basophils	Hematology	0.1	K/uL	0	0.2		0.1	K/uL	0	0.2		Normal				Y		Week 24			0.1	Normal	0	02	Early Termination	60	Female	12NOV15	111	Placebo	<250 mg/day	Yes	Yes	<250 mg/day	No	Yes	Yes	Yes	Yes
Week 24	02_004	01APR16	9:15:00	BASOLE	Basophils	Hematology	1	%	0	2		1	%	0	2		Normal				Y		Week 24			1	Normal	0	02	Early Termination	60	Female	12NOV15	111	Placebo	<250 mg/day	Yes	Yes	<250 mg/day	No	Yes	Yes	Yes	Yes
Week 24	02_004	01APR16	9:15:00	BICARB	BiCarbonate (CO2)	Chemistry	24	mmol/L	22	32		24	mmol/L	22	32		Normal				Y		Week 24			28	Normal	-4	02	Early Termination	60	Female	12NOV15	111	Placebo	<250 mg/day	Yes	Yes	<250 mg/day	No	Yes	Yes	Yes	Yes
Week 24	02_004	01APR16	9:15:00	BILIT	Bilirubin Total	Liver Function Tests	0.4	mg/dL	0.2	1.1		0.4	mg/dL	0.2	1.1		Normal				Y		Week 24			0.5	Normal	-0.1	02	Early Termination	60	Female	12NOV15	111	Placebo	<250 mg/day	Yes	Yes	<250 mg/day	No	Yes	Yes	Yes	Yes
Week 24	02_004	01APR16	9:15:00	BUN	BUN (urea)	Chemistry	17	mg/dL	8	23		17	mg/dL	8	23		Normal				Y		Week 24			19	Normal	-2	02	Early Termination	60	Female	12NOV15	111	Placebo	<250 mg/day	Yes	Yes	<250 mg/day	No	Yes	Yes	Yes	Yes
Week 24	02_004	01APR16	9:15:00	CA	Calcium	Chemistry	9.8	mg/dL	8.8	10.2		9.8	mg/dL	8.8	10.2		Normal				Y		Week 24			9.7	Normal	0.1	02	Early Termination	60	Female	12NOV15	111	Placebo	<250 mg/day	Yes	Yes	<250 mg/day	No	Yes	Yes	Yes	Yes
Week 24	02_004	01APR16	9:15:00	CL	Chloride	Chemistry	100	mmol/L	98	107		100	mmol/L	98	107		Normal				Y		Week 24			101	Normal	-1	02	Early Termination	60	Female	12NOV15	111	Placebo	<250 mg/day	Yes	Yes	<250 mg/day	No	Yes	Yes	Yes	Yes
Week 24	02_004	01APR16	9:15:00	CREAT	Creatinine	Chemistry	0.9	mg/dL	0.6	1.2		0.9	mg/dL	0.6	1.2		Normal				Y		Week 24			0.9	Normal	0	02	Early Termination	60	Female	12NOV15	111	Placebo	<250 mg/day	Yes	Yes	<250 mg/day	No	Yes	Yes	Yes	Yes
Week 24	02_004	01APR16	9:15:00	CRPHS	hs-CRP	hs-CRP	1.26	mg/L				1.26	mg/L				Normal				Y	hs-CRP CHD risk level: low risk <1.0 mg/L intermediate risk 1.0-3.0 mg/L high risk >3.0 mg/L Values >10 mg/L suggests an inflammatory disorder requiring separate evaluation. Cardiac risk assessment is not appropriate in this context.	Week 24			0.94	Normal	0.32	02	Early Termination	60	Female	12NOV15	111	Placebo	<250 mg/day	Yes	Yes	<250 mg/day	No	Yes	Yes	Yes	Yes
Week 24	02_004	01APR16	9:15:00	EOS	Abs Eosinophils	Hematology	0.2	K/uL	0	0.6		0.2	K/uL	0	0.6		Normal				Y		Week 24			0.2	Normal	0	02	Early Termination	60	Female	12NOV15	111	Placebo	<250 mg/day	Yes	Yes	<250 mg/day	No	Yes	Yes	Yes	Yes
Week 24	02_004	01APR16	9:15:00	EOSLE	Eosinophils	Hematology	3	%	0	4		3	%	0	4		Normal				Y		Week 24			3	Normal	0	02	Early Termination	60	Female	12NOV15	111	Placebo	<250 mg/day	Yes	Yes	<250 mg/day	No	Yes	Yes	Yes	Yes
Week 24	02_004	01APR16	9:15:00	GGT	GGT	Liver Function Tests	21	IU/L	7	50		21	IU/L	7	50		Normal				Y		Week 24			20	Normal	1	02	Early Termination	60	Female	12NOV15	111	Placebo	<250 mg/day	Yes	Yes	<250 mg/day	No	Yes	Yes	Yes	Yes
Week 24	02_004	01APR16	9:15:00	GLUCF	Glucose Fasting	Chemistry	137	mg/dL	70	99		137	mg/dL	70	99		High				Y		Week 24			131	High	6	02	Early Termination	60	Female	12NOV15	111	Placebo	<250 mg/day	Yes	Yes	<250 mg/day	No	Yes	Yes	Yes	Yes
Week 24	02_004	01APR16	9:15:00	HBA1C	HbA1c	HbA1c	6.2	%	4	5.6		6.2	%	4	5.6		High				Y	INTERPRETIVE INFORMATION: Hemoglobin A1cHemoglobin A1c values of 5.7-6.4 percent indicate an increasedrisk for developing diabetes mellitus. Hemoglobin A1c valuesgreater than or equal to 6.5 percent are diagnostic of diabetesmellitus. Diagnosis should be confirmed by repeating the Hb A1ctest.This boronate affinity Hb A1c method provides accurate analyticalresults in the presence of nearly all hem…	Week 24			6.1	High	0.1	02	Early Termination	60	Female	12NOV15	111	Placebo	<250 mg/day	Yes	Yes	<250 mg/day	No	Yes	Yes	Yes	Yes
Week 24	02_004	01APR16	9:15:00	HCT	Hematocrit	Hematology	39.3	%	36	46		39.3	%	36	46		Normal				Y		Week 24			38.8	Normal	0.5	02	Early Termination	60	Female	12NOV15	111	Placebo	<250 mg/day	Yes	Yes	<250 mg/day	No	Yes	Yes	Yes	Yes
Week 24	02_004	01APR16	9:15:00	HGB	Hemoglobin	Hematology	13.8	g/dL	12	15.5		13.8	g/dL	12	15.5		Normal				Y		Week 24			12.5	Normal	1.3	02	Early Termination	60	Female	12NOV15	111	Placebo	<250 mg/day	Yes	Yes	<250 mg/day	No	Yes	Yes	Yes	Yes
Week 24	02_004	01APR16	9:15:00	INSULIN	Insulin	Insulin	29.4	uIU/mL	1.9	23		29.4	uIU/mL	1.9	23		High				Y		Week 24			14.2	Normal	15.2	02	Early Termination	60	Female	12NOV15	111	Placebo	<250 mg/day	Yes	Yes	<250 mg/day	No	Yes	Yes	Yes	Yes
Week 24	02_004	01APR16	9:15:00	K	Potassium	Chemistry	3.7	mmol/L	3.5	5.1		3.7	mmol/L	3.5	5.1		Normal				Y		Week 24			4	Normal	-0.3	02	Early Termination	60	Female	12NOV15	111	Placebo	<250 mg/day	Yes	Yes	<250 mg/day	No	Yes	Yes	Yes	Yes
Week 24	02_004	01APR16	9:15:00	LYM	Abs Lymphocytes	Hematology	2.5	K/uL	0.8	4		2.5	K/uL	0.8	4		Normal				Y		Week 24			1.9	Normal	0.6	02	Early Termination	60	Female	12NOV15	111	Placebo	<250 mg/day	Yes	Yes	<250 mg/day	No	Yes	Yes	Yes	Yes
Week 24	02_004	01APR16	9:15:00	LYMLE	Lymphocytes	Hematology	31	%	20	50		31	%	20	50		Normal				Y		Week 24			25	Normal	6	02	Early Termination	60	Female	12NOV15	111	Placebo	<250 mg/day	Yes	Yes	<250 mg/day	No	Yes	Yes	Yes	Yes
Week 24	02_004	01APR16	9:15:00	MONO	Abs Monocytes	Hematology	0.6	K/uL	0	0.9		0.6	K/uL	0	0.9		Normal				Y		Week 24			0.6	Normal	0	02	Early Termination	60	Female	12NOV15	111	Placebo	<250 mg/day	Yes	Yes	<250 mg/day	No	Yes	Yes	Yes	Yes
Week 24	02_004	01APR16	9:15:00	MONOLE	Monocytes	Hematology	8	%	1	9		8	%	1	9		Normal				Y		Week 24			8	Normal	0	02	Early Termination	60	Female	12NOV15	111	Placebo	<250 mg/day	Yes	Yes	<250 mg/day	No	Yes	Yes	Yes	Yes
Week 24	02_004	01APR16	9:15:00	NEUT	Abs Neutrophil	Hematology	4.6	K/uL	1.5	7.7		4.6	K/uL	1.5	7.7		Normal				Y		Week 24			4.7	Normal	-0.1	02	Early Termination	60	Female	12NOV15	111	Placebo	<250 mg/day	Yes	Yes	<250 mg/day	No	Yes	Yes	Yes	Yes
Week 24	02_004	01APR16	9:15:00	NEUTLE	Neutrophils	Hematology	58	%	45	79		58	%	45	79		Normal				Y		Week 24			62	Normal	-4	02	Early Termination	60	Female	12NOV15	111	Placebo	<250 mg/day	Yes	Yes	<250 mg/day	No	Yes	Yes	Yes	Yes
Week 24	02_004	01APR16	9:15:00	PLAT	Platelet Count	Hematology	283	K/uL	150	450		283	K/uL	150	450		Normal				Y		Week 24			261	Normal	22	02	Early Termination	60	Female	12NOV15	111	Placebo	<250 mg/day	Yes	Yes	<250 mg/day	No	Yes	Yes	Yes	Yes
Week 24	02_004	01APR16	9:15:00	RBC	RBC	Hematology	4.09	M/uL	3.7	5.2		4.09	M/uL	3.7	5.2		Normal				Y		Week 24			4.02	Normal	0.07	02	Early Termination	60	Female	12NOV15	111	Placebo	<250 mg/day	Yes	Yes	<250 mg/day	No	Yes	Yes	Yes	Yes
Week 24	02_004	01APR16	9:15:00	SODIUM	Sodium	Chemistry	140	mmol/L	136	145		140	mmol/L	136	145		Normal				Y		Week 24			139	Normal	1	02	Early Termination	60	Female	12NOV15	111	Placebo	<250 mg/day	Yes	Yes	<250 mg/day	No	Yes	Yes	Yes	Yes
Week 24	02_004	01APR16	9:15:00	TRIG	Triglycerides	Chemistry	234	mg/dL		150		234	mg/dL		150		High				Y		Week 24			156	High	78	02	Early Termination	60	Female	12NOV15	111	Placebo	<250 mg/day	Yes	Yes	<250 mg/day	No	Yes	Yes	Yes	Yes
Week 24	02_004	01APR16	9:15:00	TSH	TSH	TSH	2.94	uIU/mL	0.34	5.6		2.94	uIU/mL	0.34	5.6		Normal				Y		Week 24			2.32	Normal	0.62	02	Early Termination	60	Female	12NOV15	111	Placebo	<250 mg/day	Yes	Yes	<250 mg/day	No	Yes	Yes	Yes	Yes
Week 24	02_004	01APR16	9:15:00	WBC	WBC	Hematology	8.0	K/uL	4	11		8	K/uL	4	11		Normal				Y		Week 24			7.5	Normal	0.5	02	Early Termination	60	Female	12NOV15	111	Placebo	<250 mg/day	Yes	Yes	<250 mg/day	No	Yes	Yes	Yes	Yes
Screening	02_005	06NOV15	10:30:00	ALP	Alkaline Phosphatase	Liver Function Tests	56	IU/L	32	92		56	IU/L	32	92		Normal				N		Screening			63	Normal		02	Entered	65	Male	04DEC15	112	Placebo	>=250 mg/day	No	No	>=250 mg/day	No	Yes	Yes	Yes	Yes
Screening	02_005	06NOV15	10:30:00	ALT	ALT	Liver Function Tests	16	IU/L	17	63		16	IU/L	17	63		Low				N		Screening			21	Normal		02	Entered	65	Male	04DEC15	112	Placebo	>=250 mg/day	No	No	>=250 mg/day	No	Yes	Yes	Yes	Yes
Screening	02_005	06NOV15	10:30:00	AST	AST	Liver Function Tests	14	IU/L	15	41		14	IU/L	15	41		Low				N		Screening			22	Normal		02	Entered	65	Male	04DEC15	112	Placebo	>=250 mg/day	No	No	>=250 mg/day	No	Yes	Yes	Yes	Yes
Screening	02_005	06NOV15	10:30:00	BILIT	Bilirubin Total	Liver Function Tests	0.5	mg/dL	0.2	1.1		0.5	mg/dL	0.2	1.1		Normal				N		Screening			0.7	Normal		02	Entered	65	Male	04DEC15	112	Placebo	>=250 mg/day	No	No	>=250 mg/day	No	Yes	Yes	Yes	Yes
Screening	02_005	06NOV15	10:30:00	GGT	GGT	Liver Function Tests	23	IU/L	7	50		23	IU/L	7	50		Normal				N		Screening			22	Normal		02	Entered	65	Male	04DEC15	112	Placebo	>=250 mg/day	No	No	>=250 mg/day	No	Yes	Yes	Yes	Yes
Screening	02_005	06NOV15	10:30:00	HBA1C	HbA1c	HbA1c	5.2	%	4	5.6		5.2	%	4	5.6		Normal				N	INTERPRETIVE INFORMATION: Hemoglobin A1cHemoglobin A1c values of 5.7-6.4 percent indicate an increasedrisk for developing diabetes mellitus. Hemoglobin A1c valuesgreater than or equal to 6.5 percent are diagnostic of diabetesmellitus. Diagnosis should be confirmed by repeating the Hb A1ctest.This boronate affinity Hb A1c method provides accurate analyticalresults in the presence of nearly all hem…	Screening			5.2	Normal		02	Entered	65	Male	04DEC15	112	Placebo	>=250 mg/day	No	No	>=250 mg/day	No	Yes	Yes	Yes	Yes
Screening	02_005	06NOV15	10:30:00	HCAB	Hepatitis C Antibody	Hepatitis C Antibody	NONREACT				NONREACT					NONREACT					N		Screening						02	Entered	65	Male	04DEC15	112	Placebo	>=250 mg/day	No	No	>=250 mg/day	No	Yes	Yes	Yes	Yes
Screening	02_005	06NOV15	10:30:00	TSH	TSH	TSH	1.16	uIU/mL	0.34	5.6		1.16	uIU/mL	0.34	5.6		Normal				N		Screening			1.16	Normal		02	Entered	65	Male	04DEC15	112	Placebo	>=250 mg/day	No	No	>=250 mg/day	No	Yes	Yes	Yes	Yes
Baseline	02_005	04DEC15	9:15:00	ALB	Albumin	Chemistry	4.2	g/dL	3.2	4.6		4.2	g/dL	3.2	4.6		Normal				Y		Baseline			4.2	Normal		02	Entered	65	Male	04DEC15	112	Placebo	>=250 mg/day	No	No	>=250 mg/day	No	Yes	Yes	Yes	Yes
Baseline	02_005	04DEC15	9:15:00	ALP	Alkaline Phosphatase	Liver Function Tests	63	IU/L	32	92		63	IU/L	32	92		Normal				Y		Baseline			63	Normal		02	Entered	65	Male	04DEC15	112	Placebo	>=250 mg/day	No	No	>=250 mg/day	No	Yes	Yes	Yes	Yes
Baseline	02_005	04DEC15	9:15:00	ALT	ALT	Liver Function Tests	21	IU/L	17	63		21	IU/L	17	63		Normal				Y		Baseline			21	Normal		02	Entered	65	Male	04DEC15	112	Placebo	>=250 mg/day	No	No	>=250 mg/day	No	Yes	Yes	Yes	Yes
Baseline	02_005	04DEC15	9:15:00	AST	AST	Liver Function Tests	22	IU/L	15	41		22	IU/L	15	41		Normal				Y		Baseline			22	Normal		02	Entered	65	Male	04DEC15	112	Placebo	>=250 mg/day	No	No	>=250 mg/day	No	Yes	Yes	Yes	Yes
Baseline	02_005	04DEC15	9:15:00	BASO	Abs Basophils	Hematology	0.1	K/uL	0	0.2		0.1	K/uL	0	0.2		Normal				Y		Baseline			0.1	Normal		02	Entered	65	Male	04DEC15	112	Placebo	>=250 mg/day	No	No	>=250 mg/day	No	Yes	Yes	Yes	Yes
Baseline	02_005	04DEC15	9:15:00	BASOLE	Basophils	Hematology	1	%	0	2		1	%	0	2		Normal				Y		Baseline			1	Normal		02	Entered	65	Male	04DEC15	112	Placebo	>=250 mg/day	No	No	>=250 mg/day	No	Yes	Yes	Yes	Yes
Baseline	02_005	04DEC15	9:15:00	BICARB	BiCarbonate (CO2)	Chemistry	24	mmol/L	22	32		24	mmol/L	22	32		Normal				Y		Baseline			24	Normal		02	Entered	65	Male	04DEC15	112	Placebo	>=250 mg/day	No	No	>=250 mg/day	No	Yes	Yes	Yes	Yes
Baseline	02_005	04DEC15	9:15:00	BILIT	Bilirubin Total	Liver Function Tests	0.7	mg/dL	0.2	1.1		0.7	mg/dL	0.2	1.1		Normal				Y		Baseline			0.7	Normal		02	Entered	65	Male	04DEC15	112	Placebo	>=250 mg/day	No	No	>=250 mg/day	No	Yes	Yes	Yes	Yes
Baseline	02_005	04DEC15	9:15:00	BUN	BUN (urea)	Chemistry	19	mg/dL	8	23		19	mg/dL	8	23		Normal				Y		Baseline			19	Normal		02	Entered	65	Male	04DEC15	112	Placebo	>=250 mg/day	No	No	>=250 mg/day	No	Yes	Yes	Yes	Yes
Baseline	02_005	04DEC15	9:15:00	CA	Calcium	Chemistry	9.1	mg/dL	8.8	10.2		9.1	mg/dL	8.8	10.2		Normal				Y		Baseline			9.1	Normal		02	Entered	65	Male	04DEC15	112	Placebo	>=250 mg/day	No	No	>=250 mg/day	No	Yes	Yes	Yes	Yes
Baseline	02_005	04DEC15	9:15:00	CL	Chloride	Chemistry	104	mmol/L	98	107		104	mmol/L	98	107		Normal				Y		Baseline			104	Normal		02	Entered	65	Male	04DEC15	112	Placebo	>=250 mg/day	No	No	>=250 mg/day	No	Yes	Yes	Yes	Yes
Baseline	02_005	04DEC15	9:15:00	CREAT	Creatinine	Chemistry	1.2	mg/dL	0.8	1.3		1.2	mg/dL	0.8	1.3		Normal				Y		Baseline			1.2	Normal		02	Entered	65	Male	04DEC15	112	Placebo	>=250 mg/day	No	No	>=250 mg/day	No	Yes	Yes	Yes	Yes
Baseline	02_005	04DEC15	9:15:00	CRPHS	hs-CRP	hs-CRP	3.28	mg/L				3.28	mg/L				Normal				Y	hs-CRP CHD risk level: low risk <1.0 mg/L intermediate risk 1.0-3.0 mg/L high risk >3.0 mg/L Values >10 mg/L suggests an inflammatory disorder requiring separate evaluation. Cardiac risk assessment is not appropriate in this context.	Baseline			3.28	Normal		02	Entered	65	Male	04DEC15	112	Placebo	>=250 mg/day	No	No	>=250 mg/day	No	Yes	Yes	Yes	Yes
Baseline	02_005	04DEC15	9:15:00	EOS	Abs Eosinophils	Hematology	0.2	K/uL	0	0.6		0.2	K/uL	0	0.6		Normal				Y		Baseline			0.2	Normal		02	Entered	65	Male	04DEC15	112	Placebo	>=250 mg/day	No	No	>=250 mg/day	No	Yes	Yes	Yes	Yes
Baseline	02_005	04DEC15	9:15:00	EOSLE	Eosinophils	Hematology	3	%	0	4		3	%	0	4		Normal				Y		Baseline			3	Normal		02	Entered	65	Male	04DEC15	112	Placebo	>=250 mg/day	No	No	>=250 mg/day	No	Yes	Yes	Yes	Yes
Baseline	02_005	04DEC15	9:15:00	GGT	GGT	Liver Function Tests	22	IU/L	7	50		22	IU/L	7	50		Normal				Y		Baseline			22	Normal		02	Entered	65	Male	04DEC15	112	Placebo	>=250 mg/day	No	No	>=250 mg/day	No	Yes	Yes	Yes	Yes
Baseline	02_005	04DEC15	9:15:00	GLUCF	Glucose Fasting	Chemistry	90	mg/dL	70	99		90	mg/dL	70	99		Normal				Y		Baseline			90	Normal		02	Entered	65	Male	04DEC15	112	Placebo	>=250 mg/day	No	No	>=250 mg/day	No	Yes	Yes	Yes	Yes
Baseline	02_005	04DEC15	9:15:00	HCT	Hematocrit	Hematology	39.6	%	38	53		39.6	%	38	53		Normal				Y		Baseline			39.6	Normal		02	Entered	65	Male	04DEC15	112	Placebo	>=250 mg/day	No	No	>=250 mg/day	No	Yes	Yes	Yes	Yes
Baseline	02_005	04DEC15	9:15:00	HGB	Hemoglobin	Hematology	13.5	g/dL	13.5	17.5		13.5	g/dL	13.5	17.5		Normal				Y		Baseline			13.5	Normal		02	Entered	65	Male	04DEC15	112	Placebo	>=250 mg/day	No	No	>=250 mg/day	No	Yes	Yes	Yes	Yes
Baseline	02_005	04DEC15	9:15:00	INSULIN	Insulin	Insulin	8.7	uIU/mL	1.9	23		8.7	uIU/mL	1.9	23		Normal				Y		Baseline			8.7	Normal		02	Entered	65	Male	04DEC15	112	Placebo	>=250 mg/day	No	No	>=250 mg/day	No	Yes	Yes	Yes	Yes
Baseline	02_005	04DEC15	9:15:00	K	Potassium	Chemistry	4.5	mmol/L	3.5	5.1		4.5	mmol/L	3.5	5.1		Normal				Y		Baseline			4.5	Normal		02	Entered	65	Male	04DEC15	112	Placebo	>=250 mg/day	No	No	>=250 mg/day	No	Yes	Yes	Yes	Yes
Baseline	02_005	04DEC15	9:15:00	LYM	Abs Lymphocytes	Hematology	2.5	K/uL	0.8	4		2.5	K/uL	0.8	4		Normal				Y		Baseline			2.5	Normal		02	Entered	65	Male	04DEC15	112	Placebo	>=250 mg/day	No	No	>=250 mg/day	No	Yes	Yes	Yes	Yes
Baseline	02_005	04DEC15	9:15:00	LYMLE	Lymphocytes	Hematology	36	%	20	50		36	%	20	50		Normal				Y		Baseline			36	Normal		02	Entered	65	Male	04DEC15	112	Placebo	>=250 mg/day	No	No	>=250 mg/day	No	Yes	Yes	Yes	Yes
Baseline	02_005	04DEC15	9:15:00	MONO	Abs Monocytes	Hematology	0.6	K/uL	0	0.9		0.6	K/uL	0	0.9		Normal				Y		Baseline			0.6	Normal		02	Entered	65	Male	04DEC15	112	Placebo	>=250 mg/day	No	No	>=250 mg/day	No	Yes	Yes	Yes	Yes
Baseline	02_005	04DEC15	9:15:00	MONOLE	Monocytes	Hematology	8	%	1	9		8	%	1	9		Normal				Y		Baseline			8	Normal		02	Entered	65	Male	04DEC15	112	Placebo	>=250 mg/day	No	No	>=250 mg/day	No	Yes	Yes	Yes	Yes
Baseline	02_005	04DEC15	9:15:00	NEUT	Abs Neutrophil	Hematology	3.6	K/uL	1.5	7.7		3.6	K/uL	1.5	7.7		Normal				Y		Baseline			3.6	Normal		02	Entered	65	Male	04DEC15	112	Placebo	>=250 mg/day	No	No	>=250 mg/day	No	Yes	Yes	Yes	Yes
Baseline	02_005	04DEC15	9:15:00	NEUTLE	Neutrophils	Hematology	51	%	45	79		51	%	45	79		Normal				Y		Baseline			51	Normal		02	Entered	65	Male	04DEC15	112	Placebo	>=250 mg/day	No	No	>=250 mg/day	No	Yes	Yes	Yes	Yes
Baseline	02_005	04DEC15	9:15:00	PLAT	Platelet Count	Hematology	128	K/uL	150	450		128	K/uL	150	450		Low				Y		Baseline			128	Low		02	Entered	65	Male	04DEC15	112	Placebo	>=250 mg/day	No	No	>=250 mg/day	No	Yes	Yes	Yes	Yes
Baseline	02_005	04DEC15	9:15:00	RBC	RBC	Hematology	4.19	M/uL	4.3	5.8		4.19	M/uL	4.3	5.8		Low				Y		Baseline			4.19	Low		02	Entered	65	Male	04DEC15	112	Placebo	>=250 mg/day	No	No	>=250 mg/day	No	Yes	Yes	Yes	Yes
Baseline	02_005	04DEC15	9:15:00	SODIUM	Sodium	Chemistry	138	mmol/L	136	145		138	mmol/L	136	145		Normal				Y		Baseline			138	Normal		02	Entered	65	Male	04DEC15	112	Placebo	>=250 mg/day	No	No	>=250 mg/day	No	Yes	Yes	Yes	Yes
Baseline	02_005	04DEC15	9:15:00	TRIG	Triglycerides	Chemistry	67	mg/dL		150		67	mg/dL		150		Normal				Y		Baseline			67	Normal		02	Entered	65	Male	04DEC15	112	Placebo	>=250 mg/day	No	No	>=250 mg/day	No	Yes	Yes	Yes	Yes
Baseline	02_005	04DEC15	9:15:00	WBC	WBC	Hematology	7.0	K/uL	4	11		7	K/uL	4	11		Normal				Y		Baseline			7	Normal		02	Entered	65	Male	04DEC15	112	Placebo	>=250 mg/day	No	No	>=250 mg/day	No	Yes	Yes	Yes	Yes
Week 12	02_005	25FEB16	9:15:00	ALP	Alkaline Phosphatase	Liver Function Tests	58	IU/L	32	92		58	IU/L	32	92		Normal				N		Week 12			63	Normal	-5	02	Entered	65	Male	04DEC15	112	Placebo	>=250 mg/day	No	No	>=250 mg/day	No	Yes	Yes	Yes	Yes
Week 12	02_005	25FEB16	9:15:00	ALT	ALT	Liver Function Tests	15	IU/L	17	63		15	IU/L	17	63		Low				N		Week 12			21	Normal	-6	02	Entered	65	Male	04DEC15	112	Placebo	>=250 mg/day	No	No	>=250 mg/day	No	Yes	Yes	Yes	Yes
Week 12	02_005	25FEB16	9:15:00	AST	AST	Liver Function Tests	19	IU/L	15	41		19	IU/L	15	41		Normal				N		Week 12			22	Normal	-3	02	Entered	65	Male	04DEC15	112	Placebo	>=250 mg/day	No	No	>=250 mg/day	No	Yes	Yes	Yes	Yes
Week 12	02_005	25FEB16	9:15:00	BASO	Abs Basophils	Hematology	0.1	K/uL	0	0.2		0.1	K/uL	0	0.2		Normal				N		Week 12			0.1	Normal	0	02	Entered	65	Male	04DEC15	112	Placebo	>=250 mg/day	No	No	>=250 mg/day	No	Yes	Yes	Yes	Yes
Week 12	02_005	25FEB16	9:15:00	BASOLE	Basophils	Hematology	1	%	0	2		1	%	0	2		Normal				N		Week 12			1	Normal	0	02	Entered	65	Male	04DEC15	112	Placebo	>=250 mg/day	No	No	>=250 mg/day	No	Yes	Yes	Yes	Yes
Week 12	02_005	25FEB16	9:15:00	BILIT	Bilirubin Total	Liver Function Tests	0.7	mg/dL	0.2	1.1		0.7	mg/dL	0.2	1.1		Normal				N		Week 12			0.7	Normal	0	02	Entered	65	Male	04DEC15	112	Placebo	>=250 mg/day	No	No	>=250 mg/day	No	Yes	Yes	Yes	Yes
Week 12	02_005	25FEB16	9:15:00	EOS	Abs Eosinophils	Hematology	0.2	K/uL	0	0.6		0.2	K/uL	0	0.6		Normal				N		Week 12			0.2	Normal	0	02	Entered	65	Male	04DEC15	112	Placebo	>=250 mg/day	No	No	>=250 mg/day	No	Yes	Yes	Yes	Yes
Week 12	02_005	25FEB16	9:15:00	EOSLE	Eosinophils	Hematology	3	%	0	4		3	%	0	4		Normal				N		Week 12			3	Normal	0	02	Entered	65	Male	04DEC15	112	Placebo	>=250 mg/day	No	No	>=250 mg/day	No	Yes	Yes	Yes	Yes
Week 12	02_005	25FEB16	9:15:00	GGT	GGT	Liver Function Tests	22	IU/L	7	50		22	IU/L	7	50		Normal				N		Week 12			22	Normal	0	02	Entered	65	Male	04DEC15	112	Placebo	>=250 mg/day	No	No	>=250 mg/day	No	Yes	Yes	Yes	Yes
Week 12	02_005	25FEB16	9:15:00	HCT	Hematocrit	Hematology	41.3	%	38	53		41.3	%	38	53		Normal				N		Week 12			39.6	Normal	1.7	02	Entered	65	Male	04DEC15	112	Placebo	>=250 mg/day	No	No	>=250 mg/day	No	Yes	Yes	Yes	Yes
Week 12	02_005	25FEB16	9:15:00	HGB	Hemoglobin	Hematology	14.4	g/dL	13.5	17.5		14.4	g/dL	13.5	17.5		Normal				N		Week 12			13.5	Normal	0.9	02	Entered	65	Male	04DEC15	112	Placebo	>=250 mg/day	No	No	>=250 mg/day	No	Yes	Yes	Yes	Yes
Week 12	02_005	25FEB16	9:15:00	LYM	Abs Lymphocytes	Hematology	2.9	K/uL	0.8	4		2.9	K/uL	0.8	4		Normal				N		Week 12			2.5	Normal	0.4	02	Entered	65	Male	04DEC15	112	Placebo	>=250 mg/day	No	No	>=250 mg/day	No	Yes	Yes	Yes	Yes
Week 12	02_005	25FEB16	9:15:00	LYMLE	Lymphocytes	Hematology	36	%	20	50		36	%	20	50		Normal				N		Week 12			36	Normal	0	02	Entered	65	Male	04DEC15	112	Placebo	>=250 mg/day	No	No	>=250 mg/day	No	Yes	Yes	Yes	Yes
Week 12	02_005	25FEB16	9:15:00	MONO	Abs Monocytes	Hematology	0.6	K/uL	0	0.9		0.6	K/uL	0	0.9		Normal				N		Week 12			0.6	Normal	0	02	Entered	65	Male	04DEC15	112	Placebo	>=250 mg/day	No	No	>=250 mg/day	No	Yes	Yes	Yes	Yes
Week 12	02_005	25FEB16	9:15:00	MONOLE	Monocytes	Hematology	7	%	1	9		7	%	1	9		Normal				N		Week 12			8	Normal	-1	02	Entered	65	Male	04DEC15	112	Placebo	>=250 mg/day	No	No	>=250 mg/day	No	Yes	Yes	Yes	Yes
Week 12	02_005	25FEB16	9:15:00	NEUT	Abs Neutrophil	Hematology	4.2	K/uL	1.5	7.7		4.2	K/uL	1.5	7.7		Normal				N		Week 12			3.6	Normal	0.6	02	Entered	65	Male	04DEC15	112	Placebo	>=250 mg/day	No	No	>=250 mg/day	No	Yes	Yes	Yes	Yes
Week 12	02_005	25FEB16	9:15:00	NEUTLE	Neutrophils	Hematology	53	%	45	79		53	%	45	79		Normal				N		Week 12			51	Normal	2	02	Entered	65	Male	04DEC15	112	Placebo	>=250 mg/day	No	No	>=250 mg/day	No	Yes	Yes	Yes	Yes
Week 12	02_005	25FEB16	9:15:00	PLAT	Platelet Count	Hematology	115	K/uL	150	450		115	K/uL	150	450		Low				N		Week 12			128	Low	-13	02	Entered	65	Male	04DEC15	112	Placebo	>=250 mg/day	No	No	>=250 mg/day	No	Yes	Yes	Yes	Yes
Week 12	02_005	25FEB16	9:15:00	RBC	RBC	Hematology	4.47	M/uL	4.3	5.8		4.47	M/uL	4.3	5.8		Normal				N		Week 12			4.19	Low	0.28	02	Entered	65	Male	04DEC15	112	Placebo	>=250 mg/day	No	No	>=250 mg/day	No	Yes	Yes	Yes	Yes
Week 12	02_005	25FEB16	9:15:00	WBC	WBC	Hematology	8.0	K/uL	4	11		8	K/uL	4	11		Normal				N		Week 12			7	Normal	1	02	Entered	65	Male	04DEC15	112	Placebo	>=250 mg/day	No	No	>=250 mg/day	No	Yes	Yes	Yes	Yes
Week 24	02_005	20MAY16	9:12:00	ALB	Albumin	Chemistry	4.4	g/dL	3.2	4.6		4.4	g/dL	3.2	4.6		Normal				Y		Week 24			4.2	Normal	0.2	02	Entered	65	Male	04DEC15	112	Placebo	>=250 mg/day	No	No	>=250 mg/day	No	Yes	Yes	Yes	Yes
Week 24	02_005	20MAY16	9:12:00	ALP	Alkaline Phosphatase	Liver Function Tests	60	IU/L	32	92		60	IU/L	32	92		Normal				Y		Week 24			63	Normal	-3	02	Entered	65	Male	04DEC15	112	Placebo	>=250 mg/day	No	No	>=250 mg/day	No	Yes	Yes	Yes	Yes
Week 24	02_005	20MAY16	9:12:00	ALT	ALT	Liver Function Tests	20	IU/L	17	63		20	IU/L	17	63		Normal				Y		Week 24			21	Normal	-1	02	Entered	65	Male	04DEC15	112	Placebo	>=250 mg/day	No	No	>=250 mg/day	No	Yes	Yes	Yes	Yes
Week 24	02_005	20MAY16	9:12:00	AST	AST	Liver Function Tests	22	IU/L	15	41		22	IU/L	15	41		Normal				Y		Week 24			22	Normal	0	02	Entered	65	Male	04DEC15	112	Placebo	>=250 mg/day	No	No	>=250 mg/day	No	Yes	Yes	Yes	Yes
Week 24	02_005	20MAY16	9:12:00	BASO	Abs Basophils	Hematology	0.1	K/uL	0	0.2		0.1	K/uL	0	0.2		Normal				Y		Week 24			0.1	Normal	0	02	Entered	65	Male	04DEC15	112	Placebo	>=250 mg/day	No	No	>=250 mg/day	No	Yes	Yes	Yes	Yes
Week 24	02_005	20MAY16	9:12:00	BASOLE	Basophils	Hematology	1	%	0	2		1	%	0	2		Normal				Y		Week 24			1	Normal	0	02	Entered	65	Male	04DEC15	112	Placebo	>=250 mg/day	No	No	>=250 mg/day	No	Yes	Yes	Yes	Yes
Week 24	02_005	20MAY16	9:12:00	BICARB	BiCarbonate (CO2)	Chemistry	23	mmol/L	22	32		23	mmol/L	22	32		Normal				Y		Week 24			24	Normal	-1	02	Entered	65	Male	04DEC15	112	Placebo	>=250 mg/day	No	No	>=250 mg/day	No	Yes	Yes	Yes	Yes
Week 24	02_005	20MAY16	9:12:00	BILIT	Bilirubin Total	Liver Function Tests	0.8	mg/dL	0.2	1.1		0.8	mg/dL	0.2	1.1		Normal				Y		Week 24			0.7	Normal	0.1	02	Entered	65	Male	04DEC15	112	Placebo	>=250 mg/day	No	No	>=250 mg/day	No	Yes	Yes	Yes	Yes
Week 24	02_005	20MAY16	9:12:00	BUN	BUN (urea)	Chemistry	25	mg/dL	8	23		25	mg/dL	8	23		High				Y		Week 24			19	Normal	6	02	Entered	65	Male	04DEC15	112	Placebo	>=250 mg/day	No	No	>=250 mg/day	No	Yes	Yes	Yes	Yes
Week 24	02_005	20MAY16	9:12:00	CA	Calcium	Chemistry	9.6	mg/dL	8.8	10.2		9.6	mg/dL	8.8	10.2		Normal				Y		Week 24			9.1	Normal	0.5	02	Entered	65	Male	04DEC15	112	Placebo	>=250 mg/day	No	No	>=250 mg/day	No	Yes	Yes	Yes	Yes
Week 24	02_005	20MAY16	9:12:00	CL	Chloride	Chemistry	103	mmol/L	98	107		103	mmol/L	98	107		Normal				Y		Week 24			104	Normal	-1	02	Entered	65	Male	04DEC15	112	Placebo	>=250 mg/day	No	No	>=250 mg/day	No	Yes	Yes	Yes	Yes
Week 24	02_005	20MAY16	9:12:00	CREAT	Creatinine	Chemistry	1.3	mg/dL	0.8	1.3		1.3	mg/dL	0.8	1.3		Normal				Y		Week 24			1.2	Normal	0.1	02	Entered	65	Male	04DEC15	112	Placebo	>=250 mg/day	No	No	>=250 mg/day	No	Yes	Yes	Yes	Yes
Week 24	02_005	20MAY16	9:12:00	CRPHS	hs-CRP	hs-CRP	4.10	mg/L				4.1	mg/L				Normal				Y	hs-CRP CHD risk level: low risk <1.0 mg/L intermediate risk 1.0-3.0 mg/L high risk >3.0 mg/L Values >10 mg/L suggests an inflammatory disorder requiring separate evaluation. Cardiac risk assessment is not appropriate in this context.	Week 24			3.28	Normal	0.82	02	Entered	65	Male	04DEC15	112	Placebo	>=250 mg/day	No	No	>=250 mg/day	No	Yes	Yes	Yes	Yes
Week 24	02_005	20MAY16	9:12:00	EOS	Abs Eosinophils	Hematology	0.2	K/uL	0	0.6		0.2	K/uL	0	0.6		Normal				Y		Week 24			0.2	Normal	0	02	Entered	65	Male	04DEC15	112	Placebo	>=250 mg/day	No	No	>=250 mg/day	No	Yes	Yes	Yes	Yes
Week 24	02_005	20MAY16	9:12:00	EOSLE	Eosinophils	Hematology	3	%	0	4		3	%	0	4		Normal				Y		Week 24			3	Normal	0	02	Entered	65	Male	04DEC15	112	Placebo	>=250 mg/day	No	No	>=250 mg/day	No	Yes	Yes	Yes	Yes
Week 24	02_005	20MAY16	9:12:00	GGT	GGT	Liver Function Tests	20	IU/L	7	50		20	IU/L	7	50		Normal				Y		Week 24			22	Normal	-2	02	Entered	65	Male	04DEC15	112	Placebo	>=250 mg/day	No	No	>=250 mg/day	No	Yes	Yes	Yes	Yes
Week 24	02_005	20MAY16	9:12:00	GLUCF	Glucose Fasting	Chemistry	76	mg/dL	70	99		76	mg/dL	70	99		Normal				Y		Week 24			90	Normal	-14	02	Entered	65	Male	04DEC15	112	Placebo	>=250 mg/day	No	No	>=250 mg/day	No	Yes	Yes	Yes	Yes
Week 24	02_005	20MAY16	9:12:00	HBA1C	HbA1c	HbA1c	5.4	%	4	5.6		5.4	%	4	5.6		Normal				Y	INTERPRETIVE INFORMATION: Hemoglobin A1cHemoglobin A1c values of 5.7-6.4 percent indicate an increasedrisk for developing diabetes mellitus. Hemoglobin A1c valuesgreater than or equal to 6.5 percent are diagnostic of diabetesmellitus. Diagnosis should be confirmed by repeating the Hb A1ctest.This boronate affinity Hb A1c method provides accurate analyticalresults in the presence of nearly all hem…	Week 24			5.2	Normal	0.2	02	Entered	65	Male	04DEC15	112	Placebo	>=250 mg/day	No	No	>=250 mg/day	No	Yes	Yes	Yes	Yes
Week 24	02_005	20MAY16	9:12:00	HCT	Hematocrit	Hematology	41.4	%	38	53		41.4	%	38	53		Normal				Y		Week 24			39.6	Normal	1.8	02	Entered	65	Male	04DEC15	112	Placebo	>=250 mg/day	No	No	>=250 mg/day	No	Yes	Yes	Yes	Yes
Week 24	02_005	20MAY16	9:12:00	HGB	Hemoglobin	Hematology	14.4	g/dL	13.5	17.5		14.4	g/dL	13.5	17.5		Normal				Y		Week 24			13.5	Normal	0.9	02	Entered	65	Male	04DEC15	112	Placebo	>=250 mg/day	No	No	>=250 mg/day	No	Yes	Yes	Yes	Yes
Week 24	02_005	20MAY16	9:12:00	INSULIN	Insulin	Insulin	9.6	uIU/mL	1.9	23		9.6	uIU/mL	1.9	23		Normal				Y		Week 24			8.7	Normal	0.9	02	Entered	65	Male	04DEC15	112	Placebo	>=250 mg/day	No	No	>=250 mg/day	No	Yes	Yes	Yes	Yes
Week 24	02_005	20MAY16	9:12:00	K	Potassium	Chemistry	4.5	mmol/L	3.5	5.1		4.5	mmol/L	3.5	5.1		Normal				Y		Week 24			4.5	Normal	0	02	Entered	65	Male	04DEC15	112	Placebo	>=250 mg/day	No	No	>=250 mg/day	No	Yes	Yes	Yes	Yes
Week 24	02_005	20MAY16	9:12:00	LYM	Abs Lymphocytes	Hematology	2.4	K/uL	0.8	4		2.4	K/uL	0.8	4		Normal				Y		Week 24			2.5	Normal	-0.1	02	Entered	65	Male	04DEC15	112	Placebo	>=250 mg/day	No	No	>=250 mg/day	No	Yes	Yes	Yes	Yes
Week 24	02_005	20MAY16	9:12:00	LYMLE	Lymphocytes	Hematology	33	%	20	50		33	%	20	50		Normal				Y		Week 24			36	Normal	-3	02	Entered	65	Male	04DEC15	112	Placebo	>=250 mg/day	No	No	>=250 mg/day	No	Yes	Yes	Yes	Yes
Week 24	02_005	20MAY16	9:12:00	MONO	Abs Monocytes	Hematology	0.6	K/uL	0	0.9		0.6	K/uL	0	0.9		Normal				Y		Week 24			0.6	Normal	0	02	Entered	65	Male	04DEC15	112	Placebo	>=250 mg/day	No	No	>=250 mg/day	No	Yes	Yes	Yes	Yes
Week 24	02_005	20MAY16	9:12:00	MONOLE	Monocytes	Hematology	9	%	1	9		9	%	1	9		Normal				Y		Week 24			8	Normal	1	02	Entered	65	Male	04DEC15	112	Placebo	>=250 mg/day	No	No	>=250 mg/day	No	Yes	Yes	Yes	Yes
Week 24	02_005	20MAY16	9:12:00	NEUT	Abs Neutrophil	Hematology	4.0	K/uL	1.5	7.7		4	K/uL	1.5	7.7		Normal				Y		Week 24			3.6	Normal	0.4	02	Entered	65	Male	04DEC15	112	Placebo	>=250 mg/day	No	No	>=250 mg/day	No	Yes	Yes	Yes	Yes
Week 24	02_005	20MAY16	9:12:00	NEUTLE	Neutrophils	Hematology	55	%	45	79		55	%	45	79		Normal				Y		Week 24			51	Normal	4	02	Entered	65	Male	04DEC15	112	Placebo	>=250 mg/day	No	No	>=250 mg/day	No	Yes	Yes	Yes	Yes
Week 24	02_005	20MAY16	9:12:00	PLAT	Platelet Count	Hematology	102	K/uL	150	450		102	K/uL	150	450		Low				Y		Week 24			128	Low	-26	02	Entered	65	Male	04DEC15	112	Placebo	>=250 mg/day	No	No	>=250 mg/day	No	Yes	Yes	Yes	Yes
Week 24	02_005	20MAY16	9:12:00	RBC	RBC	Hematology	4.49	M/uL	4.3	5.8		4.49	M/uL	4.3	5.8		Normal				Y		Week 24			4.19	Low	0.3	02	Entered	65	Male	04DEC15	112	Placebo	>=250 mg/day	No	No	>=250 mg/day	No	Yes	Yes	Yes	Yes
Week 24	02_005	20MAY16	9:12:00	SODIUM	Sodium	Chemistry	142	mmol/L	136	145		142	mmol/L	136	145		Normal				Y		Week 24			138	Normal	4	02	Entered	65	Male	04DEC15	112	Placebo	>=250 mg/day	No	No	>=250 mg/day	No	Yes	Yes	Yes	Yes
Week 24	02_005	20MAY16	9:12:00	TRIG	Triglycerides	Chemistry	76	mg/dL		150		76	mg/dL		150		Normal				Y		Week 24			67	Normal	9	02	Entered	65	Male	04DEC15	112	Placebo	>=250 mg/day	No	No	>=250 mg/day	No	Yes	Yes	Yes	Yes
Week 24	02_005	20MAY16	9:12:00	TSH	TSH	TSH	1.94	uIU/mL	0.34	5.6		1.94	uIU/mL	0.34	5.6		Normal				Y		Week 24			1.16	Normal	0.78	02	Entered	65	Male	04DEC15	112	Placebo	>=250 mg/day	No	No	>=250 mg/day	No	Yes	Yes	Yes	Yes
Week 24	02_005	20MAY16	9:12:00	WBC	WBC	Hematology	7.2	K/uL	4	11		7.2	K/uL	4	11		Normal				Y		Week 24			7	Normal	0.2	02	Entered	65	Male	04DEC15	112	Placebo	>=250 mg/day	No	No	>=250 mg/day	No	Yes	Yes	Yes	Yes
Retest	02_005	17MAR16	9:25:00	ALP	Alkaline Phosphatase	Liver Function Tests	64	IU/L	32	92		64	IU/L	32	92		Normal				N		Retest			63	Normal	1	02	Entered	65	Male	04DEC15	112	Placebo	>=250 mg/day	No	No	>=250 mg/day	No	Yes	Yes	Yes	Yes
Retest	02_005	17MAR16	9:25:00	ALT	ALT	Liver Function Tests	16	IU/L	17	63		16	IU/L	17	63		Low				N		Retest			21	Normal	-5	02	Entered	65	Male	04DEC15	112	Placebo	>=250 mg/day	No	No	>=250 mg/day	No	Yes	Yes	Yes	Yes
Retest	02_005	17MAR16	9:25:00	AST	AST	Liver Function Tests	18	IU/L	15	41		18	IU/L	15	41		Normal				N		Retest			22	Normal	-4	02	Entered	65	Male	04DEC15	112	Placebo	>=250 mg/day	No	No	>=250 mg/day	No	Yes	Yes	Yes	Yes
Retest	02_005	17MAR16	9:25:00	BILIT	Bilirubin Total	Liver Function Tests	0.4	mg/dL	0.2	1.1		0.4	mg/dL	0.2	1.1		Normal				N		Retest			0.7	Normal	-0.3	02	Entered	65	Male	04DEC15	112	Placebo	>=250 mg/day	No	No	>=250 mg/day	No	Yes	Yes	Yes	Yes
Retest	02_005	17MAR16	9:25:00	GGT	GGT	Liver Function Tests	19	IU/L	7	50		19	IU/L	7	50		Normal				N		Retest			22	Normal	-3	02	Entered	65	Male	04DEC15	112	Placebo	>=250 mg/day	No	No	>=250 mg/day	No	Yes	Yes	Yes	Yes
Screening	02_006	12NOV15	12:20:00	ALP	Alkaline Phosphatase	Liver Function Tests	61	IU/L	32	92		61	IU/L	32	92		Normal				N		Screening			61	Normal		02	Screen Failure	39	Female							<250 mg/day	Yes	No	No	No	No
Screening	02_006	12NOV15	12:20:00	ALT	ALT	Liver Function Tests	39	IU/L	14	54		39	IU/L	14	54		Normal				N		Screening			39	Normal		02	Screen Failure	39	Female							<250 mg/day	Yes	No	No	No	No
Screening	02_006	12NOV15	12:20:00	AST	AST	Liver Function Tests	21	IU/L	15	41		21	IU/L	15	41		Normal				N		Screening			21	Normal		02	Screen Failure	39	Female							<250 mg/day	Yes	No	No	No	No
Screening	02_006	12NOV15	12:20:00	BILIT	Bilirubin Total	Liver Function Tests	0.5	mg/dL	0.3	1.2		0.5	mg/dL	0.3	1.2		Normal				N		Screening			0.5	Normal		02	Screen Failure	39	Female							<250 mg/day	Yes	No	No	No	No
Screening	02_006	12NOV15	12:20:00	GGT	GGT	Liver Function Tests	30	IU/L	7	50		30	IU/L	7	50		Normal				N		Screening			30	Normal		02	Screen Failure	39	Female							<250 mg/day	Yes	No	No	No	No
Screening	02_006	12NOV15	12:20:00	HBA1C	HbA1c	HbA1c	5.7	%	4	5.6		5.7	%	4	5.6		High				N	INTERPRETIVE INFORMATION: Hemoglobin A1cHemoglobin A1c values of 5.7-6.4 percent indicate an increasedrisk for developing diabetes mellitus. Hemoglobin A1c valuesgreater than or equal to 6.5 percent are diagnostic of diabetesmellitus. Diagnosis should be confirmed by repeating the Hb A1ctest.This boronate affinity Hb A1c method provides accurate analyticalresults in the presence of nearly all hem…	Screening			5.7	High		02	Screen Failure	39	Female							<250 mg/day	Yes	No	No	No	No
Screening	02_006	12NOV15	12:20:00	HCAB	Hepatitis C Antibody	Hepatitis C Antibody	NONREACT				NONREACT					NONREACT					N		Screening						02	Screen Failure	39	Female							<250 mg/day	Yes	No	No	No	No
Screening	02_006	12NOV15	12:20:00	TSH	TSH	TSH	1.84	uIU/mL	0.34	5.6		1.84	uIU/mL	0.34	5.6		Normal				N		Screening			1.84	Normal		02	Screen Failure	39	Female							<250 mg/day	Yes	No	No	No	No
Screening	03_001	16OCT15	9:30:00	ALP	Alkaline Phosphatase	Liver Function Tests	57	IU/L	32	92		57	IU/L	32	92		Normal				N		Screening			61	Normal		03	Early Termination	53	Male	19NOV15	117	MF4637	<250 mg/day	No	No	>=250 mg/day	No	Yes	Yes	No	No
Screening	03_001	16OCT15	9:30:00	ALT	ALT	Liver Function Tests	49	IU/L	17	63		49	IU/L	17	63		Normal				N		Screening			39	Normal		03	Early Termination	53	Male	19NOV15	117	MF4637	<250 mg/day	No	No	>=250 mg/day	No	Yes	Yes	No	No
Screening	03_001	16OCT15	9:30:00	AST	AST	Liver Function Tests	30	IU/L	15	41		30	IU/L	15	41		Normal				N		Screening			27	Normal		03	Early Termination	53	Male	19NOV15	117	MF4637	<250 mg/day	No	No	>=250 mg/day	No	Yes	Yes	No	No
Screening	03_001	16OCT15	9:30:00	BILIT	Bilirubin Total	Liver Function Tests	0.8	mg/dL	0.3	1.2		0.8	mg/dL	0.3	1.2		Normal				N		Screening			0.7	Normal		03	Early Termination	53	Male	19NOV15	117	MF4637	<250 mg/day	No	No	>=250 mg/day	No	Yes	Yes	No	No
Screening	03_001	16OCT15	9:30:00	GGT	GGT	Liver Function Tests	51	IU/L	7	50		51	IU/L	7	50		High				N		Screening			50	Normal		03	Early Termination	53	Male	19NOV15	117	MF4637	<250 mg/day	No	No	>=250 mg/day	No	Yes	Yes	No	No
Screening	03_001	16OCT15	9:30:00	HBA1C	HbA1c	HbA1c	6.1	%	4	5.6		6.1	%	4	5.6		High				N	INTERPRETIVE INFORMATION: Hemoglobin A1cHemoglobin A1c values of 5.7-6.4 percent indicate an increasedrisk for developing diabetes mellitus. Hemoglobin A1c valuesgreater than or equal to 6.5 percent are diagnostic of diabetesmellitus. Diagnosis should be confirmed by repeating the Hb A1ctest.This boronate affinity Hb A1c method provides accurate analyticalresults in the presence of nearly all hem…	Screening			6.1	High		03	Early Termination	53	Male	19NOV15	117	MF4637	<250 mg/day	No	No	>=250 mg/day	No	Yes	Yes	No	No
Screening	03_001	16OCT15	9:30:00	HCAB	Hepatitis C Antibody	Hepatitis C Antibody	NONREACT				NONREACT					NONREACT					N		Screening						03	Early Termination	53	Male	19NOV15	117	MF4637	<250 mg/day	No	No	>=250 mg/day	No	Yes	Yes	No	No
Screening	03_001	16OCT15	9:30:00	TSH	TSH	TSH	3.43	uIU/mL	0.34	5.6		3.43	uIU/mL	0.34	5.6		Normal				N		Screening			3.43	Normal		03	Early Termination	53	Male	19NOV15	117	MF4637	<250 mg/day	No	No	>=250 mg/day	No	Yes	Yes	No	No
Baseline	03_001	19NOV15	10:15:00	ALB	Albumin	Chemistry	4.3	g/dL	3.5	5.2		4.3	g/dL	3.5	5.2		Normal				Y		Baseline			4.3	Normal		03	Early Termination	53	Male	19NOV15	117	MF4637	<250 mg/day	No	No	>=250 mg/day	No	Yes	Yes	No	No
Baseline	03_001	19NOV15	10:15:00	ALP	Alkaline Phosphatase	Liver Function Tests	61	IU/L	32	92		61	IU/L	32	92		Normal				Y		Baseline			61	Normal		03	Early Termination	53	Male	19NOV15	117	MF4637	<250 mg/day	No	No	>=250 mg/day	No	Yes	Yes	No	No
Baseline	03_001	19NOV15	10:15:00	ALT	ALT	Liver Function Tests	39	IU/L	17	63		39	IU/L	17	63		Normal				Y		Baseline			39	Normal		03	Early Termination	53	Male	19NOV15	117	MF4637	<250 mg/day	No	No	>=250 mg/day	No	Yes	Yes	No	No
Baseline	03_001	19NOV15	10:15:00	AST	AST	Liver Function Tests	27	IU/L	15	41		27	IU/L	15	41		Normal				Y		Baseline			27	Normal		03	Early Termination	53	Male	19NOV15	117	MF4637	<250 mg/day	No	No	>=250 mg/day	No	Yes	Yes	No	No
Baseline	03_001	19NOV15	10:15:00	BASO	Abs Basophils	Hematology	0.1	K/uL	0	0.2		0.1	K/uL	0	0.2		Normal				Y		Baseline			0.1	Normal		03	Early Termination	53	Male	19NOV15	117	MF4637	<250 mg/day	No	No	>=250 mg/day	No	Yes	Yes	No	No
Baseline	03_001	19NOV15	10:15:00	BASOLE	Basophils	Hematology	1	%	0	2		1	%	0	2		Normal				Y		Baseline			1	Normal		03	Early Termination	53	Male	19NOV15	117	MF4637	<250 mg/day	No	No	>=250 mg/day	No	Yes	Yes	No	No
Baseline	03_001	19NOV15	10:15:00	BICARB	BiCarbonate (CO2)	Chemistry	23	mmol/L	22	32		23	mmol/L	22	32		Normal				Y		Baseline			23	Normal		03	Early Termination	53	Male	19NOV15	117	MF4637	<250 mg/day	No	No	>=250 mg/day	No	Yes	Yes	No	No
Baseline	03_001	19NOV15	10:15:00	BILIT	Bilirubin Total	Liver Function Tests	0.7	mg/dL	0.3	1.2		0.7	mg/dL	0.3	1.2		Normal				Y		Baseline			0.7	Normal		03	Early Termination	53	Male	19NOV15	117	MF4637	<250 mg/day	No	No	>=250 mg/day	No	Yes	Yes	No	No
Baseline	03_001	19NOV15	10:15:00	BUN	BUN (urea)	Chemistry	10	mg/dL	6	20		10	mg/dL	6	20		Normal				Y		Baseline			10	Normal		03	Early Termination	53	Male	19NOV15	117	MF4637	<250 mg/day	No	No	>=250 mg/day	No	Yes	Yes	No	No
Baseline	03_001	19NOV15	10:15:00	CA	Calcium	Chemistry	10.3	mg/dL	8.6	10		10.3	mg/dL	8.6	10		High				Y		Baseline			10.3	High		03	Early Termination	53	Male	19NOV15	117	MF4637	<250 mg/day	No	No	>=250 mg/day	No	Yes	Yes	No	No
Baseline	03_001	19NOV15	10:15:00	CL	Chloride	Chemistry	105	mmol/L	98	107		105	mmol/L	98	107		Normal				Y		Baseline			105	Normal		03	Early Termination	53	Male	19NOV15	117	MF4637	<250 mg/day	No	No	>=250 mg/day	No	Yes	Yes	No	No
Baseline	03_001	19NOV15	10:15:00	CREAT	Creatinine	Chemistry	1.2	mg/dL	0.9	1.3		1.2	mg/dL	0.9	1.3		Normal				Y		Baseline			1.2	Normal		03	Early Termination	53	Male	19NOV15	117	MF4637	<250 mg/day	No	No	>=250 mg/day	No	Yes	Yes	No	No
Baseline	03_001	19NOV15	10:15:00	CRPHS	hs-CRP	hs-CRP	6.99	mg/L				6.99	mg/L				Normal				Y	hs-CRP CHD risk level: low risk <1.0 mg/L intermediate risk 1.0-3.0 mg/L high risk >3.0 mg/L Values >10 mg/L suggests an inflammatory disorder requiring separate evaluation. Cardiac risk assessment is not appropriate in this context.	Baseline			6.99	Normal		03	Early Termination	53	Male	19NOV15	117	MF4637	<250 mg/day	No	No	>=250 mg/day	No	Yes	Yes	No	No
Baseline	03_001	19NOV15	10:15:00	EOS	Abs Eosinophils	Hematology	0.2	K/uL	0	0.6		0.2	K/uL	0	0.6		Normal				Y		Baseline			0.2	Normal		03	Early Termination	53	Male	19NOV15	117	MF4637	<250 mg/day	No	No	>=250 mg/day	No	Yes	Yes	No	No
Baseline	03_001	19NOV15	10:15:00	EOSLE	Eosinophils	Hematology	3	%	0	4		3	%	0	4		Normal				Y		Baseline			3	Normal		03	Early Termination	53	Male	19NOV15	117	MF4637	<250 mg/day	No	No	>=250 mg/day	No	Yes	Yes	No	No
Baseline	03_001	19NOV15	10:15:00	GGT	GGT	Liver Function Tests	50	IU/L	7	50		50	IU/L	7	50		Normal				Y		Baseline			50	Normal		03	Early Termination	53	Male	19NOV15	117	MF4637	<250 mg/day	No	No	>=250 mg/day	No	Yes	Yes	No	No
Baseline	03_001	19NOV15	10:15:00	GLUCF	Glucose Fasting	Chemistry	127	mg/dL	70	99		127	mg/dL	70	99		High				Y		Baseline			127	High		03	Early Termination	53	Male	19NOV15	117	MF4637	<250 mg/day	No	No	>=250 mg/day	No	Yes	Yes	No	No
Baseline	03_001	19NOV15	10:15:00	HCT	Hematocrit	Hematology	51.6	%	38	53		51.6	%	38	53		Normal				Y		Baseline			51.6	Normal		03	Early Termination	53	Male	19NOV15	117	MF4637	<250 mg/day	No	No	>=250 mg/day	No	Yes	Yes	No	No
Baseline	03_001	19NOV15	10:15:00	HGB	Hemoglobin	Hematology	16.7	g/dL	13.5	17.5		16.7	g/dL	13.5	17.5		Normal				Y		Baseline			16.7	Normal		03	Early Termination	53	Male	19NOV15	117	MF4637	<250 mg/day	No	No	>=250 mg/day	No	Yes	Yes	No	No
Baseline	03_001	19NOV15	10:15:00	INSULIN	Insulin	Insulin	49.5	uIU/mL	1.9	23		49.5	uIU/mL	1.9	23		High				Y		Baseline			49.5	High		03	Early Termination	53	Male	19NOV15	117	MF4637	<250 mg/day	No	No	>=250 mg/day	No	Yes	Yes	No	No
Baseline	03_001	19NOV15	10:15:00	K	Potassium	Chemistry	4.6	mmol/L	3.5	5.1		4.6	mmol/L	3.5	5.1		Normal				Y		Baseline			4.6	Normal		03	Early Termination	53	Male	19NOV15	117	MF4637	<250 mg/day	No	No	>=250 mg/day	No	Yes	Yes	No	No
Baseline	03_001	19NOV15	10:15:00	LYM	Abs Lymphocytes	Hematology	1.2	K/uL	0.8	4		1.2	K/uL	0.8	4		Normal				Y		Baseline			1.2	Normal		03	Early Termination	53	Male	19NOV15	117	MF4637	<250 mg/day	No	No	>=250 mg/day	No	Yes	Yes	No	No
Baseline	03_001	19NOV15	10:15:00	LYMLE	Lymphocytes	Hematology	16	%	20	50		16	%	20	50		Low				Y		Baseline			16	Low		03	Early Termination	53	Male	19NOV15	117	MF4637	<250 mg/day	No	No	>=250 mg/day	No	Yes	Yes	No	No
Baseline	03_001	19NOV15	10:15:00	MONO	Abs Monocytes	Hematology	0.8	K/uL	0	0.9		0.8	K/uL	0	0.9		Normal				Y		Baseline			0.8	Normal		03	Early Termination	53	Male	19NOV15	117	MF4637	<250 mg/day	No	No	>=250 mg/day	No	Yes	Yes	No	No
Baseline	03_001	19NOV15	10:15:00	MONOLE	Monocytes	Hematology	10	%	1	9		10	%	1	9		High				Y		Baseline			10	High		03	Early Termination	53	Male	19NOV15	117	MF4637	<250 mg/day	No	No	>=250 mg/day	No	Yes	Yes	No	No
Baseline	03_001	19NOV15	10:15:00	NEUT	Abs Neutrophil	Hematology	5.3	K/uL	1.5	7.7		5.3	K/uL	1.5	7.7		Normal				Y		Baseline			5.3	Normal		03	Early Termination	53	Male	19NOV15	117	MF4637	<250 mg/day	No	No	>=250 mg/day	No	Yes	Yes	No	No
Baseline	03_001	19NOV15	10:15:00	NEUTLE	Neutrophils	Hematology	71	%	45	79		71	%	45	79		Normal				Y		Baseline			71	Normal		03	Early Termination	53	Male	19NOV15	117	MF4637	<250 mg/day	No	No	>=250 mg/day	No	Yes	Yes	No	No
Baseline	03_001	19NOV15	10:15:00	PLAT	Platelet Count	Hematology	186	K/uL	150	450		186	K/uL	150	450		Normal				Y		Baseline			186	Normal		03	Early Termination	53	Male	19NOV15	117	MF4637	<250 mg/day	No	No	>=250 mg/day	No	Yes	Yes	No	No
Baseline	03_001	19NOV15	10:15:00	RBC	RBC	Hematology	5.95	M/uL	4.3	5.8		5.95	M/uL	4.3	5.8		High				Y		Baseline			5.95	High		03	Early Termination	53	Male	19NOV15	117	MF4637	<250 mg/day	No	No	>=250 mg/day	No	Yes	Yes	No	No
Baseline	03_001	19NOV15	10:15:00	SODIUM	Sodium	Chemistry	141	mmol/L	136	145		141	mmol/L	136	145		Normal				Y		Baseline			141	Normal		03	Early Termination	53	Male	19NOV15	117	MF4637	<250 mg/day	No	No	>=250 mg/day	No	Yes	Yes	No	No
Baseline	03_001	19NOV15	10:15:00	TRIG	Triglycerides	Chemistry	121	mg/dL		150		121	mg/dL		150		Normal				Y		Baseline			121	Normal		03	Early Termination	53	Male	19NOV15	117	MF4637	<250 mg/day	No	No	>=250 mg/day	No	Yes	Yes	No	No
Baseline	03_001	19NOV15	10:15:00	WBC	WBC	Hematology	7.5	K/uL	4	11		7.5	K/uL	4	11		Normal				Y		Baseline			7.5	Normal		03	Early Termination	53	Male	19NOV15	117	MF4637	<250 mg/day	No	No	>=250 mg/day	No	Yes	Yes	No	No
Screening	03_002	19OCT15	13:00:00	ALP	Alkaline Phosphatase	Liver Function Tests	61	IU/L	32	92		61	IU/L	32	92		Normal				N		Screening			70	Normal		03	Early Termination	52	Female	30OCT15	116	Placebo	<250 mg/day	No	No	<250 mg/day	No	Yes	Yes	Yes	Yes
Screening	03_002	19OCT15	13:00:00	ALT	ALT	Liver Function Tests	10	IU/L	14	54		10	IU/L	14	54		Low				N		Screening			17	Normal		03	Early Termination	52	Female	30OCT15	116	Placebo	<250 mg/day	No	No	<250 mg/day	No	Yes	Yes	Yes	Yes
Screening	03_002	19OCT15	13:00:00	AST	AST	Liver Function Tests	11	IU/L	15	41		11	IU/L	15	41		Low				N		Screening			15	Normal		03	Early Termination	52	Female	30OCT15	116	Placebo	<250 mg/day	No	No	<250 mg/day	No	Yes	Yes	Yes	Yes
Screening	03_002	19OCT15	13:00:00	BILIT	Bilirubin Total	Liver Function Tests	0.2	mg/dL	0.3	1.2		0.2	mg/dL	0.3	1.2		Low				N		Screening			0.6	Normal		03	Early Termination	52	Female	30OCT15	116	Placebo	<250 mg/day	No	No	<250 mg/day	No	Yes	Yes	Yes	Yes
Screening	03_002	19OCT15	13:00:00	GGT	GGT	Liver Function Tests	31	IU/L	7	50		31	IU/L	7	50		Normal				N		Screening			37	Normal		03	Early Termination	52	Female	30OCT15	116	Placebo	<250 mg/day	No	No	<250 mg/day	No	Yes	Yes	Yes	Yes
Screening	03_002	19OCT15	13:00:00	HBA1C	HbA1c	HbA1c	5.2	%	4	5.6		5.2	%	4	5.6		Normal				N	INTERPRETIVE INFORMATION: Hemoglobin A1cHemoglobin A1c values of 5.7-6.4 percent indicate an increasedrisk for developing diabetes mellitus. Hemoglobin A1c valuesgreater than or equal to 6.5 percent are diagnostic of diabetesmellitus. Diagnosis should be confirmed by repeating the Hb A1ctest.This boronate affinity Hb A1c method provides accurate analyticalresults in the presence of nearly all hem…	Screening			5.2	Normal		03	Early Termination	52	Female	30OCT15	116	Placebo	<250 mg/day	No	No	<250 mg/day	No	Yes	Yes	Yes	Yes
Screening	03_002	19OCT15	13:00:00	HCAB	Hepatitis C Antibody	Hepatitis C Antibody	NONREACT				NONREACT					NONREACT					N		Screening						03	Early Termination	52	Female	30OCT15	116	Placebo	<250 mg/day	No	No	<250 mg/day	No	Yes	Yes	Yes	Yes
Screening	03_002	19OCT15	13:00:00	TSH	TSH	TSH	1.40	uIU/mL	0.34	5.6		1.4	uIU/mL	0.34	5.6		Normal				N		Screening			1.4	Normal		03	Early Termination	52	Female	30OCT15	116	Placebo	<250 mg/day	No	No	<250 mg/day	No	Yes	Yes	Yes	Yes
Baseline	03_002	30OCT15	8:35:00	ALB	Albumin	Chemistry	4.9	g/dL	3.5	5.2		4.9	g/dL	3.5	5.2		Normal				Y		Baseline			4.9	Normal		03	Early Termination	52	Female	30OCT15	116	Placebo	<250 mg/day	No	No	<250 mg/day	No	Yes	Yes	Yes	Yes
Baseline	03_002	30OCT15	8:35:00	ALP	Alkaline Phosphatase	Liver Function Tests	70	IU/L	32	92		70	IU/L	32	92		Normal				Y		Baseline			70	Normal		03	Early Termination	52	Female	30OCT15	116	Placebo	<250 mg/day	No	No	<250 mg/day	No	Yes	Yes	Yes	Yes
Baseline	03_002	30OCT15	8:35:00	ALT	ALT	Liver Function Tests	17	IU/L	14	54		17	IU/L	14	54		Normal				Y		Baseline			17	Normal		03	Early Termination	52	Female	30OCT15	116	Placebo	<250 mg/day	No	No	<250 mg/day	No	Yes	Yes	Yes	Yes
Baseline	03_002	30OCT15	8:35:00	AST	AST	Liver Function Tests	15	IU/L	15	41		15	IU/L	15	41		Normal				Y		Baseline			15	Normal		03	Early Termination	52	Female	30OCT15	116	Placebo	<250 mg/day	No	No	<250 mg/day	No	Yes	Yes	Yes	Yes
Baseline	03_002	30OCT15	8:35:00	BASO	Abs Basophils	Hematology	0.1	K/uL	0	0.2		0.1	K/uL	0	0.2		Normal				Y		Baseline			0.1	Normal		03	Early Termination	52	Female	30OCT15	116	Placebo	<250 mg/day	No	No	<250 mg/day	No	Yes	Yes	Yes	Yes
Baseline	03_002	30OCT15	8:35:00	BASOLE	Basophils	Hematology	1	%	0	2		1	%	0	2		Normal				Y		Baseline			1	Normal		03	Early Termination	52	Female	30OCT15	116	Placebo	<250 mg/day	No	No	<250 mg/day	No	Yes	Yes	Yes	Yes
Baseline	03_002	30OCT15	8:35:00	BICARB	BiCarbonate (CO2)	Chemistry	21	mmol/L	22	32		21	mmol/L	22	32		Low				Y		Baseline			21	Low		03	Early Termination	52	Female	30OCT15	116	Placebo	<250 mg/day	No	No	<250 mg/day	No	Yes	Yes	Yes	Yes
Baseline	03_002	30OCT15	8:35:00	BILIT	Bilirubin Total	Liver Function Tests	0.6	mg/dL	0.3	1.2		0.6	mg/dL	0.3	1.2		Normal				Y		Baseline			0.6	Normal		03	Early Termination	52	Female	30OCT15	116	Placebo	<250 mg/day	No	No	<250 mg/day	No	Yes	Yes	Yes	Yes
Baseline	03_002	30OCT15	8:35:00	BUN	BUN (urea)	Chemistry	10	mg/dL	6	20		10	mg/dL	6	20		Normal				Y		Baseline			10	Normal		03	Early Termination	52	Female	30OCT15	116	Placebo	<250 mg/day	No	No	<250 mg/day	No	Yes	Yes	Yes	Yes
Baseline	03_002	30OCT15	8:35:00	CA	Calcium	Chemistry	9.4	mg/dL	8.6	10		9.4	mg/dL	8.6	10		Normal				Y		Baseline			9.4	Normal		03	Early Termination	52	Female	30OCT15	116	Placebo	<250 mg/day	No	No	<250 mg/day	No	Yes	Yes	Yes	Yes
Baseline	03_002	30OCT15	8:35:00	CL	Chloride	Chemistry	104	mmol/L	98	107		104	mmol/L	98	107		Normal				Y		Baseline			104	Normal		03	Early Termination	52	Female	30OCT15	116	Placebo	<250 mg/day	No	No	<250 mg/day	No	Yes	Yes	Yes	Yes
Baseline	03_002	30OCT15	8:35:00	CREAT	Creatinine	Chemistry	0.6	mg/dL	0.6	1.1		0.6	mg/dL	0.6	1.1		Normal				Y		Baseline			0.6	Normal		03	Early Termination	52	Female	30OCT15	116	Placebo	<250 mg/day	No	No	<250 mg/day	No	Yes	Yes	Yes	Yes
Baseline	03_002	30OCT15	8:35:00	CRPHS	hs-CRP	hs-CRP	10.56	mg/L				10.56	mg/L				Normal				Y	hs-CRP CHD risk level: low risk <1.0 mg/L intermediate risk 1.0-3.0 mg/L high risk >3.0 mg/L Values >10 mg/L suggests an inflammatory disorder requiring separate evaluation. Cardiac risk assessment is not appropriate in this context.	Baseline			10.56	Normal		03	Early Termination	52	Female	30OCT15	116	Placebo	<250 mg/day	No	No	<250 mg/day	No	Yes	Yes	Yes	Yes
Baseline	03_002	30OCT15	8:35:00	EOS	Abs Eosinophils	Hematology	0.3	K/uL	0	0.6		0.3	K/uL	0	0.6		Normal				Y		Baseline			0.3	Normal		03	Early Termination	52	Female	30OCT15	116	Placebo	<250 mg/day	No	No	<250 mg/day	No	Yes	Yes	Yes	Yes
Baseline	03_002	30OCT15	8:35:00	EOSLE	Eosinophils	Hematology	2	%	0	4		2	%	0	4		Normal				Y		Baseline			2	Normal		03	Early Termination	52	Female	30OCT15	116	Placebo	<250 mg/day	No	No	<250 mg/day	No	Yes	Yes	Yes	Yes
Baseline	03_002	30OCT15	8:35:00	GGT	GGT	Liver Function Tests	37	IU/L	7	50		37	IU/L	7	50		Normal				Y		Baseline			37	Normal		03	Early Termination	52	Female	30OCT15	116	Placebo	<250 mg/day	No	No	<250 mg/day	No	Yes	Yes	Yes	Yes
Baseline	03_002	30OCT15	8:35:00	GLUCF	Glucose Fasting	Chemistry	101	mg/dL	70	99		101	mg/dL	70	99		High				Y		Baseline			101	High		03	Early Termination	52	Female	30OCT15	116	Placebo	<250 mg/day	No	No	<250 mg/day	No	Yes	Yes	Yes	Yes
Baseline	03_002	30OCT15	8:35:00	HCT	Hematocrit	Hematology	44.4	%	36	46		44.4	%	36	46		Normal				Y		Baseline			44.4	Normal		03	Early Termination	52	Female	30OCT15	116	Placebo	<250 mg/day	No	No	<250 mg/day	No	Yes	Yes	Yes	Yes
Baseline	03_002	30OCT15	8:35:00	HGB	Hemoglobin	Hematology	14.4	g/dL	12	15.5		14.4	g/dL	12	15.5		Normal				Y		Baseline			14.4	Normal		03	Early Termination	52	Female	30OCT15	116	Placebo	<250 mg/day	No	No	<250 mg/day	No	Yes	Yes	Yes	Yes
Baseline	03_002	30OCT15	8:35:00	INSULIN	Insulin	Insulin	7.5	uIU/mL	1.9	23		7.5	uIU/mL	1.9	23		Normal				Y		Baseline			7.5	Normal		03	Early Termination	52	Female	30OCT15	116	Placebo	<250 mg/day	No	No	<250 mg/day	No	Yes	Yes	Yes	Yes
Baseline	03_002	30OCT15	8:35:00	K	Potassium	Chemistry	3.9	mmol/L	3.5	5.1		3.9	mmol/L	3.5	5.1		Normal				Y		Baseline			3.9	Normal		03	Early Termination	52	Female	30OCT15	116	Placebo	<250 mg/day	No	No	<250 mg/day	No	Yes	Yes	Yes	Yes
Baseline	03_002	30OCT15	8:35:00	LYM	Abs Lymphocytes	Hematology	3.2	K/uL	0.8	4		3.2	K/uL	0.8	4		Normal				Y		Baseline			3.2	Normal		03	Early Termination	52	Female	30OCT15	116	Placebo	<250 mg/day	No	No	<250 mg/day	No	Yes	Yes	Yes	Yes
Baseline	03_002	30OCT15	8:35:00	LYMLE	Lymphocytes	Hematology	24	%	20	50		24	%	20	50		Normal				Y		Baseline			24	Normal		03	Early Termination	52	Female	30OCT15	116	Placebo	<250 mg/day	No	No	<250 mg/day	No	Yes	Yes	Yes	Yes
Baseline	03_002	30OCT15	8:35:00	MONO	Abs Monocytes	Hematology	0.7	K/uL	0	0.9		0.7	K/uL	0	0.9		Normal				Y		Baseline			0.7	Normal		03	Early Termination	52	Female	30OCT15	116	Placebo	<250 mg/day	No	No	<250 mg/day	No	Yes	Yes	Yes	Yes
Baseline	03_002	30OCT15	8:35:00	MONOLE	Monocytes	Hematology	5	%	1	9		5	%	1	9		Normal				Y		Baseline			5	Normal		03	Early Termination	52	Female	30OCT15	116	Placebo	<250 mg/day	No	No	<250 mg/day	No	Yes	Yes	Yes	Yes
Baseline	03_002	30OCT15	8:35:00	NEUT	Abs Neutrophil	Hematology	9.1	K/uL	1.5	7.7		9.1	K/uL	1.5	7.7		High				Y		Baseline			9.1	High		03	Early Termination	52	Female	30OCT15	116	Placebo	<250 mg/day	No	No	<250 mg/day	No	Yes	Yes	Yes	Yes
Baseline	03_002	30OCT15	8:35:00	NEUTLE	Neutrophils	Hematology	69	%	45	79		69	%	45	79		Normal				Y		Baseline			69	Normal		03	Early Termination	52	Female	30OCT15	116	Placebo	<250 mg/day	No	No	<250 mg/day	No	Yes	Yes	Yes	Yes
Baseline	03_002	30OCT15	8:35:00	PLAT	Platelet Count	Hematology	339	K/uL	150	450		339	K/uL	150	450		Normal				Y		Baseline			339	Normal		03	Early Termination	52	Female	30OCT15	116	Placebo	<250 mg/day	No	No	<250 mg/day	No	Yes	Yes	Yes	Yes
Baseline	03_002	30OCT15	8:35:00	RBC	RBC	Hematology	5.04	M/uL	3.7	5.2		5.04	M/uL	3.7	5.2		Normal				Y		Baseline			5.04	Normal		03	Early Termination	52	Female	30OCT15	116	Placebo	<250 mg/day	No	No	<250 mg/day	No	Yes	Yes	Yes	Yes
Baseline	03_002	30OCT15	8:35:00	SODIUM	Sodium	Chemistry	141	mmol/L	136	145		141	mmol/L	136	145		Normal				Y		Baseline			141	Normal		03	Early Termination	52	Female	30OCT15	116	Placebo	<250 mg/day	No	No	<250 mg/day	No	Yes	Yes	Yes	Yes
Baseline	03_002	30OCT15	8:35:00	TRIG	Triglycerides	Chemistry	187	mg/dL		150		187	mg/dL		150		High				Y		Baseline			187	High		03	Early Termination	52	Female	30OCT15	116	Placebo	<250 mg/day	No	No	<250 mg/day	No	Yes	Yes	Yes	Yes
Baseline	03_002	30OCT15	8:35:00	WBC	WBC	Hematology	13.2	K/uL	4	11		13.2	K/uL	4	11		High				Y		Baseline			13.2	High		03	Early Termination	52	Female	30OCT15	116	Placebo	<250 mg/day	No	No	<250 mg/day	No	Yes	Yes	Yes	Yes
Early Termination	03_002	07APR16	7:00:00	ALB	Albumin	Chemistry	4.9	g/dL	3.5	5.2		4.9	g/dL	3.5	5.2		Normal				Y		Early Termination			4.9	Normal	0	03	Early Termination	52	Female	30OCT15	116	Placebo	<250 mg/day	No	No	<250 mg/day	No	Yes	Yes	Yes	Yes
Early Termination	03_002	07APR16	7:00:00	ALP	Alkaline Phosphatase	Liver Function Tests	76	IU/L	32	92		76	IU/L	32	92		Normal				Y		Early Termination			70	Normal	6	03	Early Termination	52	Female	30OCT15	116	Placebo	<250 mg/day	No	No	<250 mg/day	No	Yes	Yes	Yes	Yes
Early Termination	03_002	07APR16	7:00:00	ALT	ALT	Liver Function Tests	17	IU/L	14	54		17	IU/L	14	54		Normal				Y		Early Termination			17	Normal	0	03	Early Termination	52	Female	30OCT15	116	Placebo	<250 mg/day	No	No	<250 mg/day	No	Yes	Yes	Yes	Yes
Early Termination	03_002	07APR16	7:00:00	AST	AST	Liver Function Tests	15	IU/L	15	41		15	IU/L	15	41		Normal				Y		Early Termination			15	Normal	0	03	Early Termination	52	Female	30OCT15	116	Placebo	<250 mg/day	No	No	<250 mg/day	No	Yes	Yes	Yes	Yes
Early Termination	03_002	07APR16	7:00:00	BICARB	BiCarbonate (CO2)	Chemistry	25	mmol/L	22	32		25	mmol/L	22	32		Normal				Y		Early Termination			21	Low	4	03	Early Termination	52	Female	30OCT15	116	Placebo	<250 mg/day	No	No	<250 mg/day	No	Yes	Yes	Yes	Yes
Early Termination	03_002	07APR16	7:00:00	BILIT	Bilirubin Total	Liver Function Tests	0.4	mg/dL	0.3	1.2		0.4	mg/dL	0.3	1.2		Normal				Y		Early Termination			0.6	Normal	-0.2	03	Early Termination	52	Female	30OCT15	116	Placebo	<250 mg/day	No	No	<250 mg/day	No	Yes	Yes	Yes	Yes
Early Termination	03_002	07APR16	7:00:00	BUN	BUN (urea)	Chemistry	12	mg/dL	6	20		12	mg/dL	6	20		Normal				Y		Early Termination			10	Normal	2	03	Early Termination	52	Female	30OCT15	116	Placebo	<250 mg/day	No	No	<250 mg/day	No	Yes	Yes	Yes	Yes
Early Termination	03_002	07APR16	7:00:00	CA	Calcium	Chemistry	9.6	mg/dL	8.6	10		9.6	mg/dL	8.6	10		Normal				Y		Early Termination			9.4	Normal	0.2	03	Early Termination	52	Female	30OCT15	116	Placebo	<250 mg/day	No	No	<250 mg/day	No	Yes	Yes	Yes	Yes
Early Termination	03_002	07APR16	7:00:00	CL	Chloride	Chemistry	102	mmol/L	98	107		102	mmol/L	98	107		Normal				Y		Early Termination			104	Normal	-2	03	Early Termination	52	Female	30OCT15	116	Placebo	<250 mg/day	No	No	<250 mg/day	No	Yes	Yes	Yes	Yes
Early Termination	03_002	07APR16	7:00:00	CREAT	Creatinine	Chemistry	0.6	mg/dL	0.6	1.1		0.6	mg/dL	0.6	1.1		Normal				Y		Early Termination			0.6	Normal	0	03	Early Termination	52	Female	30OCT15	116	Placebo	<250 mg/day	No	No	<250 mg/day	No	Yes	Yes	Yes	Yes
Early Termination	03_002	07APR16	7:00:00	CRPHS	hs-CRP	hs-CRP	5.96	mg/L				5.96	mg/L				Normal				Y	hs-CRP CHD risk level: low risk <1.0 mg/L intermediate risk 1.0-3.0 mg/L high risk >3.0 mg/L Values >10 mg/L suggests an inflammatory disorder requiring separate evaluation. Cardiac risk assessment is not appropriate in this context.	Early Termination			10.56	Normal	-4.6	03	Early Termination	52	Female	30OCT15	116	Placebo	<250 mg/day	No	No	<250 mg/day	No	Yes	Yes	Yes	Yes
Early Termination	03_002	07APR16	7:00:00	GGT	GGT	Liver Function Tests	27	IU/L	7	50		27	IU/L	7	50		Normal				Y		Early Termination			37	Normal	-10	03	Early Termination	52	Female	30OCT15	116	Placebo	<250 mg/day	No	No	<250 mg/day	No	Yes	Yes	Yes	Yes
Early Termination	03_002	07APR16	7:00:00	GLUCF	Glucose Fasting	Chemistry	79	mg/dL	70	99		79	mg/dL	70	99		Normal				Y		Early Termination			101	High	-22	03	Early Termination	52	Female	30OCT15	116	Placebo	<250 mg/day	No	No	<250 mg/day	No	Yes	Yes	Yes	Yes
Early Termination	03_002	07APR16	7:00:00	INSULIN	Insulin	Insulin	6.9	uIU/mL	1.9	23		6.9	uIU/mL	1.9	23		Normal				Y		Early Termination			7.5	Normal	-0.6	03	Early Termination	52	Female	30OCT15	116	Placebo	<250 mg/day	No	No	<250 mg/day	No	Yes	Yes	Yes	Yes
Early Termination	03_002	07APR16	7:00:00	K	Potassium	Chemistry	4.2	mmol/L	3.5	5.1		4.2	mmol/L	3.5	5.1		Normal				Y		Early Termination			3.9	Normal	0.3	03	Early Termination	52	Female	30OCT15	116	Placebo	<250 mg/day	No	No	<250 mg/day	No	Yes	Yes	Yes	Yes
Early Termination	03_002	07APR16	7:00:00	SODIUM	Sodium	Chemistry	138	mmol/L	136	145		138	mmol/L	136	145		Normal				Y		Early Termination			141	Normal	-3	03	Early Termination	52	Female	30OCT15	116	Placebo	<250 mg/day	No	No	<250 mg/day	No	Yes	Yes	Yes	Yes
Early Termination	03_002	07APR16	7:00:00	TRIG	Triglycerides	Chemistry	178	mg/dL		150		178	mg/dL		150		High				Y		Early Termination			187	High	-9	03	Early Termination	52	Female	30OCT15	116	Placebo	<250 mg/day	No	No	<250 mg/day	No	Yes	Yes	Yes	Yes
Early Termination	03_002	07APR16	7:00:00	TSH	TSH	TSH	1.18	uIU/mL	0.34	5.6		1.18	uIU/mL	0.34	5.6		Normal				Y		Early Termination			1.4	Normal	-0.22	03	Early Termination	52	Female	30OCT15	116	Placebo	<250 mg/day	No	No	<250 mg/day	No	Yes	Yes	Yes	Yes
Screening	03_003	22OCT15	12:45:00	ALP	Alkaline Phosphatase	Liver Function Tests	49	IU/L	32	92		49	IU/L	32	92		Normal				N		Screening			44	Normal		03	Entered	25	Male	24NOV15	121	MF4637	<250 mg/day	No	No	<250 mg/day	No	Yes	Yes	Yes	Yes
Screening	03_003	22OCT15	12:45:00	ALT	ALT	Liver Function Tests	86	IU/L	17	63		86	IU/L	17	63		High				N		Screening			69	High		03	Entered	25	Male	24NOV15	121	MF4637	<250 mg/day	No	No	<250 mg/day	No	Yes	Yes	Yes	Yes
Screening	03_003	22OCT15	12:45:00	AST	AST	Liver Function Tests	40	IU/L	15	41		40	IU/L	15	41		Normal				N		Screening			33	Normal		03	Entered	25	Male	24NOV15	121	MF4637	<250 mg/day	No	No	<250 mg/day	No	Yes	Yes	Yes	Yes
Screening	03_003	22OCT15	12:45:00	BILIT	Bilirubin Total	Liver Function Tests	0.6	mg/dL	0.3	1.2		0.6	mg/dL	0.3	1.2		Normal				N		Screening			0.4	Normal		03	Entered	25	Male	24NOV15	121	MF4637	<250 mg/day	No	No	<250 mg/day	No	Yes	Yes	Yes	Yes
Screening	03_003	22OCT15	12:45:00	GGT	GGT	Liver Function Tests	24	IU/L	7	50		24	IU/L	7	50		Normal				N		Screening			20	Normal		03	Entered	25	Male	24NOV15	121	MF4637	<250 mg/day	No	No	<250 mg/day	No	Yes	Yes	Yes	Yes
Screening	03_003	22OCT15	12:45:00	HBA1C	HbA1c	HbA1c	5.3	%	4	5.6		5.3	%	4	5.6		Normal				N	INTERPRETIVE INFORMATION: Hemoglobin A1cHemoglobin A1c values of 5.7-6.4 percent indicate an increasedrisk for developing diabetes mellitus. Hemoglobin A1c valuesgreater than or equal to 6.5 percent are diagnostic of diabetesmellitus. Diagnosis should be confirmed by repeating the Hb A1ctest.This boronate affinity Hb A1c method provides accurate analyticalresults in the presence of nearly all hem…	Screening			5.3	Normal		03	Entered	25	Male	24NOV15	121	MF4637	<250 mg/day	No	No	<250 mg/day	No	Yes	Yes	Yes	Yes
Screening	03_003	22OCT15	12:45:00	HCAB	Hepatitis C Antibody	Hepatitis C Antibody	NONREACT				NONREACT					NONREACT					N		Screening						03	Entered	25	Male	24NOV15	121	MF4637	<250 mg/day	No	No	<250 mg/day	No	Yes	Yes	Yes	Yes
Screening	03_003	22OCT15	12:45:00	TSH	TSH	TSH	0.40	uIU/mL	0.34	5.6		0.4	uIU/mL	0.34	5.6		Normal				N		Screening			0.4	Normal		03	Entered	25	Male	24NOV15	121	MF4637	<250 mg/day	No	No	<250 mg/day	No	Yes	Yes	Yes	Yes
Baseline	03_003	24NOV15	13:15:00	ALB	Albumin	Chemistry	4.3	g/dL	3.5	5.2		4.3	g/dL	3.5	5.2		Normal				N		Baseline			4.3	Normal		03	Entered	25	Male	24NOV15	121	MF4637	<250 mg/day	No	No	<250 mg/day	No	Yes	Yes	Yes	Yes
Baseline	03_003	24NOV15	13:15:00	ALP	Alkaline Phosphatase	Liver Function Tests	44	IU/L	32	92		44	IU/L	32	92		Normal				N		Baseline			44	Normal		03	Entered	25	Male	24NOV15	121	MF4637	<250 mg/day	No	No	<250 mg/day	No	Yes	Yes	Yes	Yes
Baseline	03_003	24NOV15	13:15:00	ALT	ALT	Liver Function Tests	69	IU/L	17	63		69	IU/L	17	63		High				N		Baseline			69	High		03	Entered	25	Male	24NOV15	121	MF4637	<250 mg/day	No	No	<250 mg/day	No	Yes	Yes	Yes	Yes
Baseline	03_003	24NOV15	13:15:00	AST	AST	Liver Function Tests	33	IU/L	15	41		33	IU/L	15	41		Normal				N		Baseline			33	Normal		03	Entered	25	Male	24NOV15	121	MF4637	<250 mg/day	No	No	<250 mg/day	No	Yes	Yes	Yes	Yes
Baseline	03_003	24NOV15	13:15:00	BASO	Abs Basophils	Hematology	0.1	K/uL	0	0.2		0.1	K/uL	0	0.2		Normal				N		Baseline			0.1	Normal		03	Entered	25	Male	24NOV15	121	MF4637	<250 mg/day	No	No	<250 mg/day	No	Yes	Yes	Yes	Yes
Baseline	03_003	24NOV15	13:15:00	BASOLE	Basophils	Hematology	1	%	0	2		1	%	0	2		Normal				N		Baseline			1	Normal		03	Entered	25	Male	24NOV15	121	MF4637	<250 mg/day	No	No	<250 mg/day	No	Yes	Yes	Yes	Yes
Baseline	03_003	24NOV15	13:15:00	BICARB	BiCarbonate (CO2)	Chemistry	25	mmol/L	22	32		25	mmol/L	22	32		Normal				N		Baseline			25	Normal		03	Entered	25	Male	24NOV15	121	MF4637	<250 mg/day	No	No	<250 mg/day	No	Yes	Yes	Yes	Yes
Baseline	03_003	24NOV15	13:15:00	BILIT	Bilirubin Total	Liver Function Tests	0.4	mg/dL	0.3	1.2		0.4	mg/dL	0.3	1.2		Normal				N		Baseline			0.4	Normal		03	Entered	25	Male	24NOV15	121	MF4637	<250 mg/day	No	No	<250 mg/day	No	Yes	Yes	Yes	Yes
Baseline	03_003	24NOV15	13:15:00	BUN	BUN (urea)	Chemistry	11	mg/dL	6	20		11	mg/dL	6	20		Normal				N		Baseline			11	Normal		03	Entered	25	Male	24NOV15	121	MF4637	<250 mg/day	No	No	<250 mg/day	No	Yes	Yes	Yes	Yes
Baseline	03_003	24NOV15	13:15:00	CA	Calcium	Chemistry	9.7	mg/dL	8.6	10		9.7	mg/dL	8.6	10		Normal				N		Baseline			9.7	Normal		03	Entered	25	Male	24NOV15	121	MF4637	<250 mg/day	No	No	<250 mg/day	No	Yes	Yes	Yes	Yes
Baseline	03_003	24NOV15	13:15:00	CL	Chloride	Chemistry	102	mmol/L	98	107		102	mmol/L	98	107		Normal				N		Baseline			102	Normal		03	Entered	25	Male	24NOV15	121	MF4637	<250 mg/day	No	No	<250 mg/day	No	Yes	Yes	Yes	Yes
Baseline	03_003	24NOV15	13:15:00	CREAT	Creatinine	Chemistry	0.8	mg/dL	0.9	1.3		0.8	mg/dL	0.9	1.3		Low				N		Baseline			0.8	Low		03	Entered	25	Male	24NOV15	121	MF4637	<250 mg/day	No	No	<250 mg/day	No	Yes	Yes	Yes	Yes
Baseline	03_003	24NOV15	13:15:00	CRPHS	hs-CRP	hs-CRP	2.65	mg/L				2.65	mg/L				Normal				N	hs-CRP CHD risk level: low risk <1.0 mg/L intermediate risk 1.0-3.0 mg/L high risk >3.0 mg/L Values >10 mg/L suggests an inflammatory disorder requiring separate evaluation. Cardiac risk assessment is not appropriate in this context.	Baseline			2.65	Normal		03	Entered	25	Male	24NOV15	121	MF4637	<250 mg/day	No	No	<250 mg/day	No	Yes	Yes	Yes	Yes
Baseline	03_003	24NOV15	13:15:00	EOS	Abs Eosinophils	Hematology	0.2	K/uL	0	0.6		0.2	K/uL	0	0.6		Normal				N		Baseline			0.2	Normal		03	Entered	25	Male	24NOV15	121	MF4637	<250 mg/day	No	No	<250 mg/day	No	Yes	Yes	Yes	Yes
Baseline	03_003	24NOV15	13:15:00	EOSLE	Eosinophils	Hematology	3	%	0	4		3	%	0	4		Normal				N		Baseline			3	Normal		03	Entered	25	Male	24NOV15	121	MF4637	<250 mg/day	No	No	<250 mg/day	No	Yes	Yes	Yes	Yes
Baseline	03_003	24NOV15	13:15:00	GGT	GGT	Liver Function Tests	20	IU/L	7	50		20	IU/L	7	50		Normal				N		Baseline			20	Normal		03	Entered	25	Male	24NOV15	121	MF4637	<250 mg/day	No	No	<250 mg/day	No	Yes	Yes	Yes	Yes
Baseline	03_003	24NOV15	13:15:00	GLUC	Glucose Random	Chemistry	84	mg/dL	70	139		84	mg/dL	70	139		Normal				N		Baseline			84	Normal		03	Entered	25	Male	24NOV15	121	MF4637	<250 mg/day	No	No	<250 mg/day	No	Yes	Yes	Yes	Yes
Baseline	03_003	24NOV15	13:15:00	HCT	Hematocrit	Hematology	46.5	%	38	53		46.5	%	38	53		Normal				N		Baseline			46.5	Normal		03	Entered	25	Male	24NOV15	121	MF4637	<250 mg/day	No	No	<250 mg/day	No	Yes	Yes	Yes	Yes
Baseline	03_003	24NOV15	13:15:00	HGB	Hemoglobin	Hematology	15.3	g/dL	13.5	17.5		15.3	g/dL	13.5	17.5		Normal				N		Baseline			15.3	Normal		03	Entered	25	Male	24NOV15	121	MF4637	<250 mg/day	No	No	<250 mg/day	No	Yes	Yes	Yes	Yes
Baseline	03_003	24NOV15	13:15:00	INSULIN	Insulin	Insulin	57.2	uIU/mL	1.9	23		57.2	uIU/mL	1.9	23		High				N		Baseline			57.2	High		03	Entered	25	Male	24NOV15	121	MF4637	<250 mg/day	No	No	<250 mg/day	No	Yes	Yes	Yes	Yes
Baseline	03_003	24NOV15	13:15:00	K	Potassium	Chemistry	4.6	mmol/L	3.5	5.1		4.6	mmol/L	3.5	5.1		Normal				N		Baseline			4.6	Normal		03	Entered	25	Male	24NOV15	121	MF4637	<250 mg/day	No	No	<250 mg/day	No	Yes	Yes	Yes	Yes
Baseline	03_003	24NOV15	13:15:00	LYM	Abs Lymphocytes	Hematology	2.4	K/uL	0.8	4		2.4	K/uL	0.8	4		Normal				N		Baseline			2.4	Normal		03	Entered	25	Male	24NOV15	121	MF4637	<250 mg/day	No	No	<250 mg/day	No	Yes	Yes	Yes	Yes
Baseline	03_003	24NOV15	13:15:00	LYMLE	Lymphocytes	Hematology	37	%	20	50		37	%	20	50		Normal				N		Baseline			37	Normal		03	Entered	25	Male	24NOV15	121	MF4637	<250 mg/day	No	No	<250 mg/day	No	Yes	Yes	Yes	Yes
Baseline	03_003	24NOV15	13:15:00	MONO	Abs Monocytes	Hematology	0.6	K/uL	0	0.9		0.6	K/uL	0	0.9		Normal				N		Baseline			0.6	Normal		03	Entered	25	Male	24NOV15	121	MF4637	<250 mg/day	No	No	<250 mg/day	No	Yes	Yes	Yes	Yes
Baseline	03_003	24NOV15	13:15:00	MONOLE	Monocytes	Hematology	9	%	1	9		9	%	1	9		Normal				N		Baseline			9	Normal		03	Entered	25	Male	24NOV15	121	MF4637	<250 mg/day	No	No	<250 mg/day	No	Yes	Yes	Yes	Yes
Baseline	03_003	24NOV15	13:15:00	NEUT	Abs Neutrophil	Hematology	3.4	K/uL	1.5	7.7		3.4	K/uL	1.5	7.7		Normal				N		Baseline			3.4	Normal		03	Entered	25	Male	24NOV15	121	MF4637	<250 mg/day	No	No	<250 mg/day	No	Yes	Yes	Yes	Yes
Baseline	03_003	24NOV15	13:15:00	NEUTLE	Neutrophils	Hematology	51	%	45	79		51	%	45	79		Normal				N		Baseline			51	Normal		03	Entered	25	Male	24NOV15	121	MF4637	<250 mg/day	No	No	<250 mg/day	No	Yes	Yes	Yes	Yes
Baseline	03_003	24NOV15	13:15:00	PLAT	Platelet Count	Hematology	225	K/uL	150	450		225	K/uL	150	450		Normal				N		Baseline			225	Normal		03	Entered	25	Male	24NOV15	121	MF4637	<250 mg/day	No	No	<250 mg/day	No	Yes	Yes	Yes	Yes
Baseline	03_003	24NOV15	13:15:00	RBC	RBC	Hematology	5.27	M/uL	4.3	5.8		5.27	M/uL	4.3	5.8		Normal				N		Baseline			5.27	Normal		03	Entered	25	Male	24NOV15	121	MF4637	<250 mg/day	No	No	<250 mg/day	No	Yes	Yes	Yes	Yes
Baseline	03_003	24NOV15	13:15:00	SODIUM	Sodium	Chemistry	141	mmol/L	136	145		141	mmol/L	136	145		Normal				N		Baseline			141	Normal		03	Entered	25	Male	24NOV15	121	MF4637	<250 mg/day	No	No	<250 mg/day	No	Yes	Yes	Yes	Yes
Baseline	03_003	24NOV15	13:15:00	TRIG	Triglycerides	Chemistry	254	mg/dL		150		254	mg/dL		150		High				N		Baseline			254	High		03	Entered	25	Male	24NOV15	121	MF4637	<250 mg/day	No	No	<250 mg/day	No	Yes	Yes	Yes	Yes
Baseline	03_003	24NOV15	13:15:00	WBC	WBC	Hematology	6.6	K/uL	4	11		6.6	K/uL	4	11		Normal				N		Baseline			6.6	Normal		03	Entered	25	Male	24NOV15	121	MF4637	<250 mg/day	No	No	<250 mg/day	No	Yes	Yes	Yes	Yes
Week 12	03_003	03MAR16	9:05:00	ALP	Alkaline Phosphatase	Liver Function Tests	43	IU/L	32	92		43	IU/L	32	92		Normal				N		Week 12			44	Normal	-1	03	Entered	25	Male	24NOV15	121	MF4637	<250 mg/day	No	No	<250 mg/day	No	Yes	Yes	Yes	Yes
Week 12	03_003	03MAR16	9:05:00	ALT	ALT	Liver Function Tests	74	IU/L	17	63		74	IU/L	17	63		High				N		Week 12			69	High	5	03	Entered	25	Male	24NOV15	121	MF4637	<250 mg/day	No	No	<250 mg/day	No	Yes	Yes	Yes	Yes
Week 12	03_003	03MAR16	9:05:00	AST	AST	Liver Function Tests	34	IU/L	15	41		34	IU/L	15	41		Normal				N		Week 12			33	Normal	1	03	Entered	25	Male	24NOV15	121	MF4637	<250 mg/day	No	No	<250 mg/day	No	Yes	Yes	Yes	Yes
Week 12	03_003	03MAR16	9:05:00	BASO	Abs Basophils	Hematology	0.1	K/uL	0	0.2		0.1	K/uL	0	0.2		Normal				N		Week 12			0.1	Normal	0	03	Entered	25	Male	24NOV15	121	MF4637	<250 mg/day	No	No	<250 mg/day	No	Yes	Yes	Yes	Yes
Week 12	03_003	03MAR16	9:05:00	BASOLE	Basophils	Hematology	1	%	0	2		1	%	0	2		Normal				N		Week 12			1	Normal	0	03	Entered	25	Male	24NOV15	121	MF4637	<250 mg/day	No	No	<250 mg/day	No	Yes	Yes	Yes	Yes
Week 12	03_003	03MAR16	9:05:00	BILIT	Bilirubin Total	Liver Function Tests	0.7	mg/dL	0.3	1.2		0.7	mg/dL	0.3	1.2		Normal				N		Week 12			0.4	Normal	0.3	03	Entered	25	Male	24NOV15	121	MF4637	<250 mg/day	No	No	<250 mg/day	No	Yes	Yes	Yes	Yes
Week 12	03_003	03MAR16	9:05:00	EOS	Abs Eosinophils	Hematology	0.3	K/uL	0	0.6		0.3	K/uL	0	0.6		Normal				N		Week 12			0.2	Normal	0.1	03	Entered	25	Male	24NOV15	121	MF4637	<250 mg/day	No	No	<250 mg/day	No	Yes	Yes	Yes	Yes
Week 12	03_003	03MAR16	9:05:00	EOSLE	Eosinophils	Hematology	6	%	0	4		6	%	0	4		High				N		Week 12			3	Normal	3	03	Entered	25	Male	24NOV15	121	MF4637	<250 mg/day	No	No	<250 mg/day	No	Yes	Yes	Yes	Yes
Week 12	03_003	03MAR16	9:05:00	GGT	GGT	Liver Function Tests	21	IU/L	7	50		21	IU/L	7	50		Normal				N		Week 12			20	Normal	1	03	Entered	25	Male	24NOV15	121	MF4637	<250 mg/day	No	No	<250 mg/day	No	Yes	Yes	Yes	Yes
Week 12	03_003	03MAR16	9:05:00	HCT	Hematocrit	Hematology	45.6	%	38	53		45.6	%	38	53		Normal				N		Week 12			46.5	Normal	-0.9	03	Entered	25	Male	24NOV15	121	MF4637	<250 mg/day	No	No	<250 mg/day	No	Yes	Yes	Yes	Yes
Week 12	03_003	03MAR16	9:05:00	HGB	Hemoglobin	Hematology	15.3	g/dL	13.5	17.5		15.3	g/dL	13.5	17.5		Normal				N		Week 12			15.3	Normal	0	03	Entered	25	Male	24NOV15	121	MF4637	<250 mg/day	No	No	<250 mg/day	No	Yes	Yes	Yes	Yes
Week 12	03_003	03MAR16	9:05:00	LYM	Abs Lymphocytes	Hematology	2.4	K/uL	0.8	4		2.4	K/uL	0.8	4		Normal				N		Week 12			2.4	Normal	0	03	Entered	25	Male	24NOV15	121	MF4637	<250 mg/day	No	No	<250 mg/day	No	Yes	Yes	Yes	Yes
Week 12	03_003	03MAR16	9:05:00	LYMLE	Lymphocytes	Hematology	41	%	20	50		41	%	20	50		Normal				N		Week 12			37	Normal	4	03	Entered	25	Male	24NOV15	121	MF4637	<250 mg/day	No	No	<250 mg/day	No	Yes	Yes	Yes	Yes
Week 12	03_003	03MAR16	9:05:00	MONO	Abs Monocytes	Hematology	0.4	K/uL	0	0.9		0.4	K/uL	0	0.9		Normal				N		Week 12			0.6	Normal	-0.2	03	Entered	25	Male	24NOV15	121	MF4637	<250 mg/day	No	No	<250 mg/day	No	Yes	Yes	Yes	Yes
Week 12	03_003	03MAR16	9:05:00	MONOLE	Monocytes	Hematology	7	%	1	9		7	%	1	9		Normal				N		Week 12			9	Normal	-2	03	Entered	25	Male	24NOV15	121	MF4637	<250 mg/day	No	No	<250 mg/day	No	Yes	Yes	Yes	Yes
Week 12	03_003	03MAR16	9:05:00	NEUT	Abs Neutrophil	Hematology	2.7	K/uL	1.5	7.7		2.7	K/uL	1.5	7.7		Normal				N		Week 12			3.4	Normal	-0.7	03	Entered	25	Male	24NOV15	121	MF4637	<250 mg/day	No	No	<250 mg/day	No	Yes	Yes	Yes	Yes
Week 12	03_003	03MAR16	9:05:00	NEUTLE	Neutrophils	Hematology	46	%	45	79		46	%	45	79		Normal				N		Week 12			51	Normal	-5	03	Entered	25	Male	24NOV15	121	MF4637	<250 mg/day	No	No	<250 mg/day	No	Yes	Yes	Yes	Yes
Week 12	03_003	03MAR16	9:05:00	PLAT	Platelet Count	Hematology	206	K/uL	150	450		206	K/uL	150	450		Normal				N		Week 12			225	Normal	-19	03	Entered	25	Male	24NOV15	121	MF4637	<250 mg/day	No	No	<250 mg/day	No	Yes	Yes	Yes	Yes
Week 12	03_003	03MAR16	9:05:00	RBC	RBC	Hematology	5.24	M/uL	4.3	5.8		5.24	M/uL	4.3	5.8		Normal				N		Week 12			5.27	Normal	-0.03	03	Entered	25	Male	24NOV15	121	MF4637	<250 mg/day	No	No	<250 mg/day	No	Yes	Yes	Yes	Yes
Week 12	03_003	03MAR16	9:05:00	WBC	WBC	Hematology	5.8	K/uL	4	11		5.8	K/uL	4	11		Normal				N		Week 12			6.6	Normal	-0.8	03	Entered	25	Male	24NOV15	121	MF4637	<250 mg/day	No	No	<250 mg/day	No	Yes	Yes	Yes	Yes
Week 24	03_003	01JUN16	9:30:00	ALB	Albumin	Chemistry	4.2	g/dL	3.5	5.2		4.2	g/dL	3.5	5.2		Normal				Y		Week 24			4.3	Normal	-0.1	03	Entered	25	Male	24NOV15	121	MF4637	<250 mg/day	No	No	<250 mg/day	No	Yes	Yes	Yes	Yes
Week 24	03_003	01JUN16	9:30:00	ALP	Alkaline Phosphatase	Liver Function Tests	49	IU/L	32	92		49	IU/L	32	92		Normal				Y		Week 24			44	Normal	5	03	Entered	25	Male	24NOV15	121	MF4637	<250 mg/day	No	No	<250 mg/day	No	Yes	Yes	Yes	Yes
Week 24	03_003	01JUN16	9:30:00	ALT	ALT	Liver Function Tests	85	IU/L	17	63		85	IU/L	17	63		High				Y		Week 24			69	High	16	03	Entered	25	Male	24NOV15	121	MF4637	<250 mg/day	No	No	<250 mg/day	No	Yes	Yes	Yes	Yes
Week 24	03_003	01JUN16	9:30:00	AST	AST	Liver Function Tests	41	IU/L	15	41		41	IU/L	15	41		Normal				Y		Week 24			33	Normal	8	03	Entered	25	Male	24NOV15	121	MF4637	<250 mg/day	No	No	<250 mg/day	No	Yes	Yes	Yes	Yes
Week 24	03_003	01JUN16	9:30:00	BASO	Abs Basophils	Hematology	0.1	K/uL	0	0.2		0.1	K/uL	0	0.2		Normal				Y		Week 24			0.1	Normal	0	03	Entered	25	Male	24NOV15	121	MF4637	<250 mg/day	No	No	<250 mg/day	No	Yes	Yes	Yes	Yes
Week 24	03_003	01JUN16	9:30:00	BASOLE	Basophils	Hematology	1	%	0	2		1	%	0	2		Normal				Y		Week 24			1	Normal	0	03	Entered	25	Male	24NOV15	121	MF4637	<250 mg/day	No	No	<250 mg/day	No	Yes	Yes	Yes	Yes
Week 24	03_003	01JUN16	9:30:00	BICARB	BiCarbonate (CO2)	Chemistry	22	mmol/L	22	32		22	mmol/L	22	32		Normal				Y		Week 24			25	Normal	-3	03	Entered	25	Male	24NOV15	121	MF4637	<250 mg/day	No	No	<250 mg/day	No	Yes	Yes	Yes	Yes
Week 24	03_003	01JUN16	9:30:00	BILIT	Bilirubin Total	Liver Function Tests	0.4	mg/dL	0.3	1.2		0.4	mg/dL	0.3	1.2		Normal				Y		Week 24			0.4	Normal	0	03	Entered	25	Male	24NOV15	121	MF4637	<250 mg/day	No	No	<250 mg/day	No	Yes	Yes	Yes	Yes
Week 24	03_003	01JUN16	9:30:00	BUN	BUN (urea)	Chemistry	10	mg/dL	6	20		10	mg/dL	6	20		Normal				Y		Week 24			11	Normal	-1	03	Entered	25	Male	24NOV15	121	MF4637	<250 mg/day	No	No	<250 mg/day	No	Yes	Yes	Yes	Yes
Week 24	03_003	01JUN16	9:30:00	CA	Calcium	Chemistry	9.3	mg/dL	8.6	10		9.3	mg/dL	8.6	10		Normal				Y		Week 24			9.7	Normal	-0.4	03	Entered	25	Male	24NOV15	121	MF4637	<250 mg/day	No	No	<250 mg/day	No	Yes	Yes	Yes	Yes
Week 24	03_003	01JUN16	9:30:00	CL	Chloride	Chemistry	100	mmol/L	98	107		100	mmol/L	98	107		Normal				Y		Week 24			102	Normal	-2	03	Entered	25	Male	24NOV15	121	MF4637	<250 mg/day	No	No	<250 mg/day	No	Yes	Yes	Yes	Yes
Week 24	03_003	01JUN16	9:30:00	CREAT	Creatinine	Chemistry	0.7	mg/dL	0.9	1.3		0.7	mg/dL	0.9	1.3		Low				Y		Week 24			0.8	Low	-0.1	03	Entered	25	Male	24NOV15	121	MF4637	<250 mg/day	No	No	<250 mg/day	No	Yes	Yes	Yes	Yes
Week 24	03_003	01JUN16	9:30:00	CRPHS	hs-CRP	hs-CRP	2.60	mg/L				2.6	mg/L				Normal				Y	hs-CRP CHD risk level: low risk <1.0 mg/L intermediate risk 1.0-3.0 mg/L high risk >3.0 mg/L Values >10 mg/L suggests an inflammatory disorder requiring separate evaluation. Cardiac risk assessment is not appropriate in this context.	Week 24			2.65	Normal	-0.05	03	Entered	25	Male	24NOV15	121	MF4637	<250 mg/day	No	No	<250 mg/day	No	Yes	Yes	Yes	Yes
Week 24	03_003	01JUN16	9:30:00	EOS	Abs Eosinophils	Hematology	0.2	K/uL	0	0.6		0.2	K/uL	0	0.6		Normal				Y		Week 24			0.2	Normal	0	03	Entered	25	Male	24NOV15	121	MF4637	<250 mg/day	No	No	<250 mg/day	No	Yes	Yes	Yes	Yes
Week 24	03_003	01JUN16	9:30:00	EOSLE	Eosinophils	Hematology	3	%	0	4		3	%	0	4		Normal				Y		Week 24			3	Normal	0	03	Entered	25	Male	24NOV15	121	MF4637	<250 mg/day	No	No	<250 mg/day	No	Yes	Yes	Yes	Yes
Week 24	03_003	01JUN16	9:30:00	GGT	GGT	Liver Function Tests	27	IU/L	7	50		27	IU/L	7	50		Normal				Y		Week 24			20	Normal	7	03	Entered	25	Male	24NOV15	121	MF4637	<250 mg/day	No	No	<250 mg/day	No	Yes	Yes	Yes	Yes
Week 24	03_003	01JUN16	9:30:00	GLUCF	Glucose Fasting	Chemistry	77	mg/dL	70	99		77	mg/dL	70	99		Normal				Y		Week 24						03	Entered	25	Male	24NOV15	121	MF4637	<250 mg/day	No	No	<250 mg/day	No	Yes	Yes	Yes	Yes
Week 24	03_003	01JUN16	9:30:00	HBA1C	HbA1c	HbA1c	5.4	%	4	5.6		5.4	%	4	5.6		Normal				Y	INTERPRETIVE INFORMATION: Hemoglobin A1cHemoglobin A1c values of 5.7-6.4 percent indicate an increasedrisk for developing diabetes mellitus. Hemoglobin A1c valuesgreater than or equal to 6.5 percent are diagnostic of diabetesmellitus. Diagnosis should be confirmed by repeating the Hb A1ctest.This boronate affinity Hb A1c method provides accurate analyticalresults in the presence of nearly all hem…	Week 24			5.3	Normal	0.1	03	Entered	25	Male	24NOV15	121	MF4637	<250 mg/day	No	No	<250 mg/day	No	Yes	Yes	Yes	Yes
Week 24	03_003	01JUN16	9:30:00	HCT	Hematocrit	Hematology	51.6	%	38	53		51.6	%	38	53		Normal				Y		Week 24			46.5	Normal	5.1	03	Entered	25	Male	24NOV15	121	MF4637	<250 mg/day	No	No	<250 mg/day	No	Yes	Yes	Yes	Yes
Week 24	03_003	01JUN16	9:30:00	HGB	Hemoglobin	Hematology	17.1	g/dL	13.5	17.5		17.1	g/dL	13.5	17.5		Normal				Y		Week 24			15.3	Normal	1.8	03	Entered	25	Male	24NOV15	121	MF4637	<250 mg/day	No	No	<250 mg/day	No	Yes	Yes	Yes	Yes
Week 24	03_003	01JUN16	9:30:00	INSULIN	Insulin	Insulin	36.0	uIU/mL	1.9	23		36	uIU/mL	1.9	23		High				Y		Week 24			57.2	High	-21.2	03	Entered	25	Male	24NOV15	121	MF4637	<250 mg/day	No	No	<250 mg/day	No	Yes	Yes	Yes	Yes
Week 24	03_003	01JUN16	9:30:00	K	Potassium	Chemistry	4.3	mmol/L	3.5	5.1		4.3	mmol/L	3.5	5.1		Normal				Y		Week 24			4.6	Normal	-0.3	03	Entered	25	Male	24NOV15	121	MF4637	<250 mg/day	No	No	<250 mg/day	No	Yes	Yes	Yes	Yes
Week 24	03_003	01JUN16	9:30:00	LYM	Abs Lymphocytes	Hematology	2.8	K/uL	0.8	4		2.8	K/uL	0.8	4		Normal				Y		Week 24			2.4	Normal	0.4	03	Entered	25	Male	24NOV15	121	MF4637	<250 mg/day	No	No	<250 mg/day	No	Yes	Yes	Yes	Yes
Week 24	03_003	01JUN16	9:30:00	LYMLE	Lymphocytes	Hematology	37	%	20	50		37	%	20	50		Normal				Y		Week 24			37	Normal	0	03	Entered	25	Male	24NOV15	121	MF4637	<250 mg/day	No	No	<250 mg/day	No	Yes	Yes	Yes	Yes
Week 24	03_003	01JUN16	9:30:00	MONO	Abs Monocytes	Hematology	0.5	K/uL	0	0.9		0.5	K/uL	0	0.9		Normal				Y		Week 24			0.6	Normal	-0.1	03	Entered	25	Male	24NOV15	121	MF4637	<250 mg/day	No	No	<250 mg/day	No	Yes	Yes	Yes	Yes
Week 24	03_003	01JUN16	9:30:00	MONOLE	Monocytes	Hematology	7	%	1	9		7	%	1	9		Normal				Y		Week 24			9	Normal	-2	03	Entered	25	Male	24NOV15	121	MF4637	<250 mg/day	No	No	<250 mg/day	No	Yes	Yes	Yes	Yes
Week 24	03_003	01JUN16	9:30:00	NEUT	Abs Neutrophil	Hematology	4.1	K/uL	1.5	7.7		4.1	K/uL	1.5	7.7		Normal				Y		Week 24			3.4	Normal	0.7	03	Entered	25	Male	24NOV15	121	MF4637	<250 mg/day	No	No	<250 mg/day	No	Yes	Yes	Yes	Yes
Week 24	03_003	01JUN16	9:30:00	NEUTLE	Neutrophils	Hematology	53	%	45	79		53	%	45	79		Normal				Y		Week 24			51	Normal	2	03	Entered	25	Male	24NOV15	121	MF4637	<250 mg/day	No	No	<250 mg/day	No	Yes	Yes	Yes	Yes
Week 24	03_003	01JUN16	9:30:00	PLAT	Platelet Count	Hematology	235	K/uL	150	450		235	K/uL	150	450		Normal				Y		Week 24			225	Normal	10	03	Entered	25	Male	24NOV15	121	MF4637	<250 mg/day	No	No	<250 mg/day	No	Yes	Yes	Yes	Yes
Week 24	03_003	01JUN16	9:30:00	RBC	RBC	Hematology	5.80	M/uL	4.3	5.8		5.8	M/uL	4.3	5.8		Normal				Y		Week 24			5.27	Normal	0.53	03	Entered	25	Male	24NOV15	121	MF4637	<250 mg/day	No	No	<250 mg/day	No	Yes	Yes	Yes	Yes
Week 24	03_003	01JUN16	9:30:00	SODIUM	Sodium	Chemistry	137	mmol/L	136	145		137	mmol/L	136	145		Normal				Y		Week 24			141	Normal	-4	03	Entered	25	Male	24NOV15	121	MF4637	<250 mg/day	No	No	<250 mg/day	No	Yes	Yes	Yes	Yes
Week 24	03_003	01JUN16	9:30:00	TRIG	Triglycerides	Chemistry	249	mg/dL		150		249	mg/dL		150		High				Y		Week 24			254	High	-5	03	Entered	25	Male	24NOV15	121	MF4637	<250 mg/day	No	No	<250 mg/day	No	Yes	Yes	Yes	Yes
Week 24	03_003	01JUN16	9:30:00	TSH	TSH	TSH	0.88	uIU/mL	0.34	5.6		0.88	uIU/mL	0.34	5.6		Normal				Y		Week 24			0.4	Normal	0.48	03	Entered	25	Male	24NOV15	121	MF4637	<250 mg/day	No	No	<250 mg/day	No	Yes	Yes	Yes	Yes
Week 24	03_003	01JUN16	9:30:00	WBC	WBC	Hematology	7.7	K/uL	4	11		7.7	K/uL	4	11		Normal				Y		Week 24			6.6	Normal	1.1	03	Entered	25	Male	24NOV15	121	MF4637	<250 mg/day	No	No	<250 mg/day	No	Yes	Yes	Yes	Yes
Retest	03_003	03NOV15	10:00:00	TSH	TSH	TSH	0.45	uIU/mL	0.34	5.6		0.45	uIU/mL	0.34	5.6		Normal				N		Retest			0.4	Normal	0.05	03	Entered	25	Male	24NOV15	121	MF4637	<250 mg/day	No	No	<250 mg/day	No	Yes	Yes	Yes	Yes
Screening	03_004	26OCT15	7:15:00	ALP	Alkaline Phosphatase	Liver Function Tests	63	IU/L	32	92		63	IU/L	32	92		Normal				N		Screening			62	Normal		03	Entered	56	Female	24NOV15	118	Placebo	<250 mg/day	No	No	>=250 mg/day	No	Yes	Yes	Yes	Yes
Screening	03_004	26OCT15	7:15:00	ALT	ALT	Liver Function Tests	46	IU/L	14	54		46	IU/L	14	54		Normal				N		Screening			41	Normal		03	Entered	56	Female	24NOV15	118	Placebo	<250 mg/day	No	No	>=250 mg/day	No	Yes	Yes	Yes	Yes
Screening	03_004	26OCT15	7:15:00	AST	AST	Liver Function Tests	53	IU/L	15	41		53	IU/L	15	41		High				N		Screening			41	Normal		03	Entered	56	Female	24NOV15	118	Placebo	<250 mg/day	No	No	>=250 mg/day	No	Yes	Yes	Yes	Yes
Screening	03_004	26OCT15	7:15:00	BILIT	Bilirubin Total	Liver Function Tests	1.1	mg/dL	0.2	1.1		1.1	mg/dL	0.2	1.1		Normal				N		Screening			0.9	Normal		03	Entered	56	Female	24NOV15	118	Placebo	<250 mg/day	No	No	>=250 mg/day	No	Yes	Yes	Yes	Yes
Screening	03_004	26OCT15	7:15:00	GGT	GGT	Liver Function Tests	25	IU/L	7	50		25	IU/L	7	50		Normal				N		Screening			26	Normal		03	Entered	56	Female	24NOV15	118	Placebo	<250 mg/day	No	No	>=250 mg/day	No	Yes	Yes	Yes	Yes
Screening	03_004	26OCT15	7:15:00	HBA1C	HbA1c	HbA1c	8.0	%	4	5.6		8	%	4	5.6		High				N	INTERPRETIVE INFORMATION: Hemoglobin A1cHemoglobin A1c values of 5.7-6.4 percent indicate an increasedrisk for developing diabetes mellitus. Hemoglobin A1c valuesgreater than or equal to 6.5 percent are diagnostic of diabetesmellitus. Diagnosis should be confirmed by repeating the Hb A1ctest.This boronate affinity Hb A1c method provides accurate analyticalresults in the presence of nearly all hem…	Screening			8	High		03	Entered	56	Female	24NOV15	118	Placebo	<250 mg/day	No	No	>=250 mg/day	No	Yes	Yes	Yes	Yes
Screening	03_004	26OCT15	7:15:00	HCAB	Hepatitis C Antibody	Hepatitis C Antibody	NONREACT				NONREACT					NONREACT					N		Screening						03	Entered	56	Female	24NOV15	118	Placebo	<250 mg/day	No	No	>=250 mg/day	No	Yes	Yes	Yes	Yes
Screening	03_004	26OCT15	7:15:00	TSH	TSH	TSH	2.21	uIU/mL	0.34	5.6		2.21	uIU/mL	0.34	5.6		Normal				N		Screening			2.21	Normal		03	Entered	56	Female	24NOV15	118	Placebo	<250 mg/day	No	No	>=250 mg/day	No	Yes	Yes	Yes	Yes
Baseline	03_004	23NOV15	8:30:00	ALB	Albumin	Chemistry	3.9	g/dL	3.2	4.6		3.9	g/dL	3.2	4.6		Normal				Y		Baseline			3.9	Normal		03	Entered	56	Female	24NOV15	118	Placebo	<250 mg/day	No	No	>=250 mg/day	No	Yes	Yes	Yes	Yes
Baseline	03_004	23NOV15	8:30:00	ALP	Alkaline Phosphatase	Liver Function Tests	62	IU/L	32	92		62	IU/L	32	92		Normal				Y		Baseline			62	Normal		03	Entered	56	Female	24NOV15	118	Placebo	<250 mg/day	No	No	>=250 mg/day	No	Yes	Yes	Yes	Yes
Baseline	03_004	23NOV15	8:30:00	ALT	ALT	Liver Function Tests	41	IU/L	14	54		41	IU/L	14	54		Normal				Y		Baseline			41	Normal		03	Entered	56	Female	24NOV15	118	Placebo	<250 mg/day	No	No	>=250 mg/day	No	Yes	Yes	Yes	Yes
Baseline	03_004	23NOV15	8:30:00	AST	AST	Liver Function Tests	41	IU/L	15	41		41	IU/L	15	41		Normal				Y		Baseline			41	Normal		03	Entered	56	Female	24NOV15	118	Placebo	<250 mg/day	No	No	>=250 mg/day	No	Yes	Yes	Yes	Yes
Baseline	03_004	23NOV15	8:30:00	BASO	Abs Basophils	Hematology	0.1	K/uL	0	0.2		0.1	K/uL	0	0.2		Normal				Y		Baseline			0.1	Normal		03	Entered	56	Female	24NOV15	118	Placebo	<250 mg/day	No	No	>=250 mg/day	No	Yes	Yes	Yes	Yes
Baseline	03_004	23NOV15	8:30:00	BASOLE	Basophils	Hematology	1	%	0	2		1	%	0	2		Normal				Y		Baseline			1	Normal		03	Entered	56	Female	24NOV15	118	Placebo	<250 mg/day	No	No	>=250 mg/day	No	Yes	Yes	Yes	Yes
Baseline	03_004	23NOV15	8:30:00	BICARB	BiCarbonate (CO2)	Chemistry	26	mmol/L	22	32		26	mmol/L	22	32		Normal				Y		Baseline			26	Normal		03	Entered	56	Female	24NOV15	118	Placebo	<250 mg/day	No	No	>=250 mg/day	No	Yes	Yes	Yes	Yes
Baseline	03_004	23NOV15	8:30:00	BILIT	Bilirubin Total	Liver Function Tests	0.9	mg/dL	0.2	1.1		0.9	mg/dL	0.2	1.1		Normal				Y		Baseline			0.9	Normal		03	Entered	56	Female	24NOV15	118	Placebo	<250 mg/day	No	No	>=250 mg/day	No	Yes	Yes	Yes	Yes
Baseline	03_004	23NOV15	8:30:00	BUN	BUN (urea)	Chemistry	17	mg/dL	8	23		17	mg/dL	8	23		Normal				Y		Baseline			17	Normal		03	Entered	56	Female	24NOV15	118	Placebo	<250 mg/day	No	No	>=250 mg/day	No	Yes	Yes	Yes	Yes
Baseline	03_004	23NOV15	8:30:00	CA	Calcium	Chemistry	9.5	mg/dL	8.8	10.2		9.5	mg/dL	8.8	10.2		Normal				Y		Baseline			9.5	Normal		03	Entered	56	Female	24NOV15	118	Placebo	<250 mg/day	No	No	>=250 mg/day	No	Yes	Yes	Yes	Yes
Baseline	03_004	23NOV15	8:30:00	CL	Chloride	Chemistry	98	mmol/L	98	107		98	mmol/L	98	107		Normal				Y		Baseline			98	Normal		03	Entered	56	Female	24NOV15	118	Placebo	<250 mg/day	No	No	>=250 mg/day	No	Yes	Yes	Yes	Yes
Baseline	03_004	23NOV15	8:30:00	CREAT	Creatinine	Chemistry	0.6	mg/dL	0.6	1.2		0.6	mg/dL	0.6	1.2		Normal				Y		Baseline			0.6	Normal		03	Entered	56	Female	24NOV15	118	Placebo	<250 mg/day	No	No	>=250 mg/day	No	Yes	Yes	Yes	Yes
Baseline	03_004	23NOV15	8:30:00	CRPHS	hs-CRP	hs-CRP	4.89	mg/L				4.89	mg/L				Normal				Y	hs-CRP CHD risk level: low risk <1.0 mg/L intermediate risk 1.0-3.0 mg/L high risk >3.0 mg/L Values >10 mg/L suggests an inflammatory disorder requiring separate evaluation. Cardiac risk assessment is not appropriate in this context.	Baseline			4.89	Normal		03	Entered	56	Female	24NOV15	118	Placebo	<250 mg/day	No	No	>=250 mg/day	No	Yes	Yes	Yes	Yes
Baseline	03_004	23NOV15	8:30:00	EOS	Abs Eosinophils	Hematology	0.1	K/uL	0	0.6		0.1	K/uL	0	0.6		Normal				Y		Baseline			0.1	Normal		03	Entered	56	Female	24NOV15	118	Placebo	<250 mg/day	No	No	>=250 mg/day	No	Yes	Yes	Yes	Yes
Baseline	03_004	23NOV15	8:30:00	EOSLE	Eosinophils	Hematology	2	%	0	4		2	%	0	4		Normal				Y		Baseline			2	Normal		03	Entered	56	Female	24NOV15	118	Placebo	<250 mg/day	No	No	>=250 mg/day	No	Yes	Yes	Yes	Yes
Baseline	03_004	23NOV15	8:30:00	GGT	GGT	Liver Function Tests	26	IU/L	7	50		26	IU/L	7	50		Normal				Y		Baseline			26	Normal		03	Entered	56	Female	24NOV15	118	Placebo	<250 mg/day	No	No	>=250 mg/day	No	Yes	Yes	Yes	Yes
Baseline	03_004	23NOV15	8:30:00	GLUCF	Glucose Fasting	Chemistry	208	mg/dL	70	99		208	mg/dL	70	99		High				Y		Baseline			208	High		03	Entered	56	Female	24NOV15	118	Placebo	<250 mg/day	No	No	>=250 mg/day	No	Yes	Yes	Yes	Yes
Baseline	03_004	23NOV15	8:30:00	HCT	Hematocrit	Hematology	39.3	%	36	46		39.3	%	36	46		Normal				Y		Baseline			39.3	Normal		03	Entered	56	Female	24NOV15	118	Placebo	<250 mg/day	No	No	>=250 mg/day	No	Yes	Yes	Yes	Yes
Baseline	03_004	23NOV15	8:30:00	HGB	Hemoglobin	Hematology	12.9	g/dL	12	15.5		12.9	g/dL	12	15.5		Normal				Y		Baseline			12.9	Normal		03	Entered	56	Female	24NOV15	118	Placebo	<250 mg/day	No	No	>=250 mg/day	No	Yes	Yes	Yes	Yes
Baseline	03_004	23NOV15	8:30:00	INSULIN	Insulin	Insulin	6.4	uIU/mL	1.9	23		6.4	uIU/mL	1.9	23		Normal				Y		Baseline			6.4	Normal		03	Entered	56	Female	24NOV15	118	Placebo	<250 mg/day	No	No	>=250 mg/day	No	Yes	Yes	Yes	Yes
Baseline	03_004	23NOV15	8:30:00	K	Potassium	Chemistry	3.7	mmol/L	3.5	5.1		3.7	mmol/L	3.5	5.1		Normal				Y		Baseline			3.7	Normal		03	Entered	56	Female	24NOV15	118	Placebo	<250 mg/day	No	No	>=250 mg/day	No	Yes	Yes	Yes	Yes
Baseline	03_004	23NOV15	8:30:00	LYM	Abs Lymphocytes	Hematology	1.4	K/uL	0.8	4		1.4	K/uL	0.8	4		Normal				Y		Baseline			1.4	Normal		03	Entered	56	Female	24NOV15	118	Placebo	<250 mg/day	No	No	>=250 mg/day	No	Yes	Yes	Yes	Yes
Baseline	03_004	23NOV15	8:30:00	LYMLE	Lymphocytes	Hematology	27	%	20	50		27	%	20	50		Normal				Y		Baseline			27	Normal		03	Entered	56	Female	24NOV15	118	Placebo	<250 mg/day	No	No	>=250 mg/day	No	Yes	Yes	Yes	Yes
Baseline	03_004	23NOV15	8:30:00	MONO	Abs Monocytes	Hematology	0.6	K/uL	0	0.9		0.6	K/uL	0	0.9		Normal				Y		Baseline			0.6	Normal		03	Entered	56	Female	24NOV15	118	Placebo	<250 mg/day	No	No	>=250 mg/day	No	Yes	Yes	Yes	Yes
Baseline	03_004	23NOV15	8:30:00	MONOLE	Monocytes	Hematology	12	%	1	9		12	%	1	9		High				Y		Baseline			12	High		03	Entered	56	Female	24NOV15	118	Placebo	<250 mg/day	No	No	>=250 mg/day	No	Yes	Yes	Yes	Yes
Baseline	03_004	23NOV15	8:30:00	NEUT	Abs Neutrophil	Hematology	3.0	K/uL	1.5	7.7		3	K/uL	1.5	7.7		Normal				Y		Baseline			3	Normal		03	Entered	56	Female	24NOV15	118	Placebo	<250 mg/day	No	No	>=250 mg/day	No	Yes	Yes	Yes	Yes
Baseline	03_004	23NOV15	8:30:00	NEUTLE	Neutrophils	Hematology	58	%	45	79		58	%	45	79		Normal				Y		Baseline			58	Normal		03	Entered	56	Female	24NOV15	118	Placebo	<250 mg/day	No	No	>=250 mg/day	No	Yes	Yes	Yes	Yes
Baseline	03_004	23NOV15	8:30:00	PLAT	Platelet Count	Hematology	263	K/uL	150	450		263	K/uL	150	450		Normal				Y		Baseline			263	Normal		03	Entered	56	Female	24NOV15	118	Placebo	<250 mg/day	No	No	>=250 mg/day	No	Yes	Yes	Yes	Yes
Baseline	03_004	23NOV15	8:30:00	RBC	RBC	Hematology	4.36	M/uL	3.7	5.2		4.36	M/uL	3.7	5.2		Normal				Y		Baseline			4.36	Normal		03	Entered	56	Female	24NOV15	118	Placebo	<250 mg/day	No	No	>=250 mg/day	No	Yes	Yes	Yes	Yes
Baseline	03_004	23NOV15	8:30:00	SODIUM	Sodium	Chemistry	138	mmol/L	136	145		138	mmol/L	136	145		Normal				Y		Baseline			138	Normal		03	Entered	56	Female	24NOV15	118	Placebo	<250 mg/day	No	No	>=250 mg/day	No	Yes	Yes	Yes	Yes
Baseline	03_004	23NOV15	8:30:00	TRIG	Triglycerides	Chemistry	89	mg/dL		150		89	mg/dL		150		Normal				Y		Baseline			89	Normal		03	Entered	56	Female	24NOV15	118	Placebo	<250 mg/day	No	No	>=250 mg/day	No	Yes	Yes	Yes	Yes
Baseline	03_004	23NOV15	8:30:00	WBC	WBC	Hematology	5.1	K/uL	4	11		5.1	K/uL	4	11		Normal				Y		Baseline			5.1	Normal		03	Entered	56	Female	24NOV15	118	Placebo	<250 mg/day	No	No	>=250 mg/day	No	Yes	Yes	Yes	Yes
Week 12	03_004	16FEB16	7:10:00	ALP	Alkaline Phosphatase	Liver Function Tests	66	IU/L	32	92		66	IU/L	32	92		Normal				N		Week 12			62	Normal	4	03	Entered	56	Female	24NOV15	118	Placebo	<250 mg/day	No	No	>=250 mg/day	No	Yes	Yes	Yes	Yes
Week 12	03_004	16FEB16	7:10:00	ALT	ALT	Liver Function Tests	53	IU/L	14	54		53	IU/L	14	54		Normal				N		Week 12			41	Normal	12	03	Entered	56	Female	24NOV15	118	Placebo	<250 mg/day	No	No	>=250 mg/day	No	Yes	Yes	Yes	Yes
Week 12	03_004	16FEB16	7:10:00	AST	AST	Liver Function Tests	58	IU/L	15	41		58	IU/L	15	41		High				N		Week 12			41	Normal	17	03	Entered	56	Female	24NOV15	118	Placebo	<250 mg/day	No	No	>=250 mg/day	No	Yes	Yes	Yes	Yes
Week 12	03_004	16FEB16	7:10:00	BASO	Abs Basophils	Hematology	0.0	K/uL	0	0.2		0	K/uL	0	0.2		Normal				N		Week 12			0.1	Normal	-0.1	03	Entered	56	Female	24NOV15	118	Placebo	<250 mg/day	No	No	>=250 mg/day	No	Yes	Yes	Yes	Yes
Week 12	03_004	16FEB16	7:10:00	BASOLE	Basophils	Hematology	1	%	0	2		1	%	0	2		Normal				N		Week 12			1	Normal	0	03	Entered	56	Female	24NOV15	118	Placebo	<250 mg/day	No	No	>=250 mg/day	No	Yes	Yes	Yes	Yes
Week 12	03_004	16FEB16	7:10:00	BILIT	Bilirubin Total	Liver Function Tests	0.9	mg/dL	0.2	1.1		0.9	mg/dL	0.2	1.1		Normal				N		Week 12			0.9	Normal	0	03	Entered	56	Female	24NOV15	118	Placebo	<250 mg/day	No	No	>=250 mg/day	No	Yes	Yes	Yes	Yes
Week 12	03_004	16FEB16	7:10:00	EOS	Abs Eosinophils	Hematology	0.0	K/uL	0	0.6		0	K/uL	0	0.6		Normal				N		Week 12			0.1	Normal	-0.1	03	Entered	56	Female	24NOV15	118	Placebo	<250 mg/day	No	No	>=250 mg/day	No	Yes	Yes	Yes	Yes
Week 12	03_004	16FEB16	7:10:00	EOSLE	Eosinophils	Hematology	1	%	0	4		1	%	0	4		Normal				N		Week 12			2	Normal	-1	03	Entered	56	Female	24NOV15	118	Placebo	<250 mg/day	No	No	>=250 mg/day	No	Yes	Yes	Yes	Yes
Week 12	03_004	16FEB16	7:10:00	GGT	GGT	Liver Function Tests	36	IU/L	7	50		36	IU/L	7	50		Normal				N		Week 12			26	Normal	10	03	Entered	56	Female	24NOV15	118	Placebo	<250 mg/day	No	No	>=250 mg/day	No	Yes	Yes	Yes	Yes
Week 12	03_004	16FEB16	7:10:00	HCT	Hematocrit	Hematology	36.0	%	36	46		36	%	36	46		Normal				N		Week 12			39.3	Normal	-3.3	03	Entered	56	Female	24NOV15	118	Placebo	<250 mg/day	No	No	>=250 mg/day	No	Yes	Yes	Yes	Yes
Week 12	03_004	16FEB16	7:10:00	HGB	Hemoglobin	Hematology	12.0	g/dL	12	15.5		12	g/dL	12	15.5		Normal				N		Week 12			12.9	Normal	-0.9	03	Entered	56	Female	24NOV15	118	Placebo	<250 mg/day	No	No	>=250 mg/day	No	Yes	Yes	Yes	Yes
Week 12	03_004	16FEB16	7:10:00	LYM	Abs Lymphocytes	Hematology	1.2	K/uL	0.8	4		1.2	K/uL	0.8	4		Normal				N		Week 12			1.4	Normal	-0.2	03	Entered	56	Female	24NOV15	118	Placebo	<250 mg/day	No	No	>=250 mg/day	No	Yes	Yes	Yes	Yes
Week 12	03_004	16FEB16	7:10:00	LYMLE	Lymphocytes	Hematology	32	%	20	50		32	%	20	50		Normal				N		Week 12			27	Normal	5	03	Entered	56	Female	24NOV15	118	Placebo	<250 mg/day	No	No	>=250 mg/day	No	Yes	Yes	Yes	Yes
Week 12	03_004	16FEB16	7:10:00	MONO	Abs Monocytes	Hematology	0.4	K/uL	0	0.9		0.4	K/uL	0	0.9		Normal				N		Week 12			0.6	Normal	-0.2	03	Entered	56	Female	24NOV15	118	Placebo	<250 mg/day	No	No	>=250 mg/day	No	Yes	Yes	Yes	Yes
Week 12	03_004	16FEB16	7:10:00	MONOLE	Monocytes	Hematology	9	%	1	9		9	%	1	9		Normal				N		Week 12			12	High	-3	03	Entered	56	Female	24NOV15	118	Placebo	<250 mg/day	No	No	>=250 mg/day	No	Yes	Yes	Yes	Yes
Week 12	03_004	16FEB16	7:10:00	NEUT	Abs Neutrophil	Hematology	2.2	K/uL	1.5	7.7		2.2	K/uL	1.5	7.7		Normal				N		Week 12			3	Normal	-0.8	03	Entered	56	Female	24NOV15	118	Placebo	<250 mg/day	No	No	>=250 mg/day	No	Yes	Yes	Yes	Yes
Week 12	03_004	16FEB16	7:10:00	NEUTLE	Neutrophils	Hematology	57	%	45	79		57	%	45	79		Normal				N		Week 12			58	Normal	-1	03	Entered	56	Female	24NOV15	118	Placebo	<250 mg/day	No	No	>=250 mg/day	No	Yes	Yes	Yes	Yes
Week 12	03_004	16FEB16	7:10:00	PLAT	Platelet Count	Hematology	310	K/uL	150	450		310	K/uL	150	450		Normal				N		Week 12			263	Normal	47	03	Entered	56	Female	24NOV15	118	Placebo	<250 mg/day	No	No	>=250 mg/day	No	Yes	Yes	Yes	Yes
Week 12	03_004	16FEB16	7:10:00	RBC	RBC	Hematology	4.02	M/uL	3.7	5.2		4.02	M/uL	3.7	5.2		Normal				N		Week 12			4.36	Normal	-0.34	03	Entered	56	Female	24NOV15	118	Placebo	<250 mg/day	No	No	>=250 mg/day	No	Yes	Yes	Yes	Yes
Week 12	03_004	16FEB16	7:10:00	WBC	WBC	Hematology	3.9	K/uL	4	11		3.9	K/uL	4	11		Low				N		Week 12			5.1	Normal	-1.2	03	Entered	56	Female	24NOV15	118	Placebo	<250 mg/day	No	No	>=250 mg/day	No	Yes	Yes	Yes	Yes
Week 24	03_004	10MAY16	7:30:00	ALB	Albumin	Chemistry	3.9	g/dL	3.2	4.6		3.9	g/dL	3.2	4.6		Normal				Y		Week 24			3.9	Normal	0	03	Entered	56	Female	24NOV15	118	Placebo	<250 mg/day	No	No	>=250 mg/day	No	Yes	Yes	Yes	Yes
Week 24	03_004	10MAY16	7:30:00	ALP	Alkaline Phosphatase	Liver Function Tests	76	IU/L	32	92		76	IU/L	32	92		Normal				Y		Week 24			62	Normal	14	03	Entered	56	Female	24NOV15	118	Placebo	<250 mg/day	No	No	>=250 mg/day	No	Yes	Yes	Yes	Yes
Week 24	03_004	10MAY16	7:30:00	ALT	ALT	Liver Function Tests	51	IU/L	14	54		51	IU/L	14	54		Normal				Y		Week 24			41	Normal	10	03	Entered	56	Female	24NOV15	118	Placebo	<250 mg/day	No	No	>=250 mg/day	No	Yes	Yes	Yes	Yes
Week 24	03_004	10MAY16	7:30:00	AST	AST	Liver Function Tests	45	IU/L	15	41		45	IU/L	15	41		High				Y		Week 24			41	Normal	4	03	Entered	56	Female	24NOV15	118	Placebo	<250 mg/day	No	No	>=250 mg/day	No	Yes	Yes	Yes	Yes
Week 24	03_004	10MAY16	7:30:00	BASO	Abs Basophils	Hematology	0.0	K/uL	0	0.2		0	K/uL	0	0.2		Normal				Y		Week 24			0.1	Normal	-0.1	03	Entered	56	Female	24NOV15	118	Placebo	<250 mg/day	No	No	>=250 mg/day	No	Yes	Yes	Yes	Yes
Week 24	03_004	10MAY16	7:30:00	BASOLE	Basophils	Hematology	0	%	0	2		0	%	0	2		Normal				Y		Week 24			1	Normal	-1	03	Entered	56	Female	24NOV15	118	Placebo	<250 mg/day	No	No	>=250 mg/day	No	Yes	Yes	Yes	Yes
Week 24	03_004	10MAY16	7:30:00	BICARB	BiCarbonate (CO2)	Chemistry	24	mmol/L	22	32		24	mmol/L	22	32		Normal				Y		Week 24			26	Normal	-2	03	Entered	56	Female	24NOV15	118	Placebo	<250 mg/day	No	No	>=250 mg/day	No	Yes	Yes	Yes	Yes
Week 24	03_004	10MAY16	7:30:00	BILIT	Bilirubin Total	Liver Function Tests	1.0	mg/dL	0.2	1.1		1	mg/dL	0.2	1.1		Normal				Y		Week 24			0.9	Normal	0.1	03	Entered	56	Female	24NOV15	118	Placebo	<250 mg/day	No	No	>=250 mg/day	No	Yes	Yes	Yes	Yes
Week 24	03_004	10MAY16	7:30:00	BUN	BUN (urea)	Chemistry	13	mg/dL	8	23		13	mg/dL	8	23		Normal				Y		Week 24			17	Normal	-4	03	Entered	56	Female	24NOV15	118	Placebo	<250 mg/day	No	No	>=250 mg/day	No	Yes	Yes	Yes	Yes
Week 24	03_004	10MAY16	7:30:00	CA	Calcium	Chemistry	9.6	mg/dL	8.8	10.2		9.6	mg/dL	8.8	10.2		Normal				Y		Week 24			9.5	Normal	0.1	03	Entered	56	Female	24NOV15	118	Placebo	<250 mg/day	No	No	>=250 mg/day	No	Yes	Yes	Yes	Yes
Week 24	03_004	10MAY16	7:30:00	CL	Chloride	Chemistry	100	mmol/L	98	107		100	mmol/L	98	107		Normal				Y		Week 24			98	Normal	2	03	Entered	56	Female	24NOV15	118	Placebo	<250 mg/day	No	No	>=250 mg/day	No	Yes	Yes	Yes	Yes
Week 24	03_004	10MAY16	7:30:00	CREAT	Creatinine	Chemistry	0.5	mg/dL	0.6	1.2		0.5	mg/dL	0.6	1.2		Low				Y		Week 24			0.6	Normal	-0.1	03	Entered	56	Female	24NOV15	118	Placebo	<250 mg/day	No	No	>=250 mg/day	No	Yes	Yes	Yes	Yes
Week 24	03_004	10MAY16	7:30:00	CRPHS	hs-CRP	hs-CRP	4.90	mg/L				4.9	mg/L				Normal				Y	hs-CRP CHD risk level: low risk <1.0 mg/L intermediate risk 1.0-3.0 mg/L high risk >3.0 mg/L Values >10 mg/L suggests an inflammatory disorder requiring separate evaluation. Cardiac risk assessment is not appropriate in this context.	Week 24			4.89	Normal	0.01	03	Entered	56	Female	24NOV15	118	Placebo	<250 mg/day	No	No	>=250 mg/day	No	Yes	Yes	Yes	Yes
Week 24	03_004	10MAY16	7:30:00	EOS	Abs Eosinophils	Hematology	0.0	K/uL	0	0.6		0	K/uL	0	0.6		Normal				Y		Week 24			0.1	Normal	-0.1	03	Entered	56	Female	24NOV15	118	Placebo	<250 mg/day	No	No	>=250 mg/day	No	Yes	Yes	Yes	Yes
Week 24	03_004	10MAY16	7:30:00	EOSLE	Eosinophils	Hematology	1	%	0	4		1	%	0	4		Normal				Y		Week 24			2	Normal	-1	03	Entered	56	Female	24NOV15	118	Placebo	<250 mg/day	No	No	>=250 mg/day	No	Yes	Yes	Yes	Yes
Week 24	03_004	10MAY16	7:30:00	GGT	GGT	Liver Function Tests	38	IU/L	7	50		38	IU/L	7	50		Normal				Y		Week 24			26	Normal	12	03	Entered	56	Female	24NOV15	118	Placebo	<250 mg/day	No	No	>=250 mg/day	No	Yes	Yes	Yes	Yes
Week 24	03_004	10MAY16	7:30:00	GLUCF	Glucose Fasting	Chemistry	241	mg/dL	70	99		241	mg/dL	70	99		High				Y		Week 24			208	High	33	03	Entered	56	Female	24NOV15	118	Placebo	<250 mg/day	No	No	>=250 mg/day	No	Yes	Yes	Yes	Yes
Week 24	03_004	10MAY16	7:30:00	HBA1C	HbA1c	HbA1c	9.1	%	4	5.6		9.1	%	4	5.6		High				Y	INTERPRETIVE INFORMATION: Hemoglobin A1cHemoglobin A1c values of 5.7-6.4 percent indicate an increasedrisk for developing diabetes mellitus. Hemoglobin A1c valuesgreater than or equal to 6.5 percent are diagnostic of diabetesmellitus. Diagnosis should be confirmed by repeating the Hb A1ctest.This boronate affinity Hb A1c method provides accurate analyticalresults in the presence of nearly all hem…	Week 24			8	High	1.1	03	Entered	56	Female	24NOV15	118	Placebo	<250 mg/day	No	No	>=250 mg/day	No	Yes	Yes	Yes	Yes
Week 24	03_004	10MAY16	7:30:00	HCT	Hematocrit	Hematology	46.4	%	36	46		46.4	%	36	46		High				Y		Week 24			39.3	Normal	7.1	03	Entered	56	Female	24NOV15	118	Placebo	<250 mg/day	No	No	>=250 mg/day	No	Yes	Yes	Yes	Yes
Week 24	03_004	10MAY16	7:30:00	HGB	Hemoglobin	Hematology	15.3	g/dL	12	15.5		15.3	g/dL	12	15.5		Normal				Y		Week 24			12.9	Normal	2.4	03	Entered	56	Female	24NOV15	118	Placebo	<250 mg/day	No	No	>=250 mg/day	No	Yes	Yes	Yes	Yes
Week 24	03_004	10MAY16	7:30:00	INSULIN	Insulin	Insulin	6.3	uIU/mL	1.9	23		6.3	uIU/mL	1.9	23		Normal				Y		Week 24			6.4	Normal	-0.1	03	Entered	56	Female	24NOV15	118	Placebo	<250 mg/day	No	No	>=250 mg/day	No	Yes	Yes	Yes	Yes
Week 24	03_004	10MAY16	7:30:00	K	Potassium	Chemistry	4.7	mmol/L	3.5	5.1		4.7	mmol/L	3.5	5.1		Normal				Y		Week 24			3.7	Normal	1	03	Entered	56	Female	24NOV15	118	Placebo	<250 mg/day	No	No	>=250 mg/day	No	Yes	Yes	Yes	Yes
Week 24	03_004	10MAY16	7:30:00	LYM	Abs Lymphocytes	Hematology	1.3	K/uL	0.8	4		1.3	K/uL	0.8	4		Normal				Y		Week 24			1.4	Normal	-0.1	03	Entered	56	Female	24NOV15	118	Placebo	<250 mg/day	No	No	>=250 mg/day	No	Yes	Yes	Yes	Yes
Week 24	03_004	10MAY16	7:30:00	LYMLE	Lymphocytes	Hematology	27	%	20	50		27	%	20	50		Normal				Y		Week 24			27	Normal	0	03	Entered	56	Female	24NOV15	118	Placebo	<250 mg/day	No	No	>=250 mg/day	No	Yes	Yes	Yes	Yes
Week 24	03_004	10MAY16	7:30:00	MONO	Abs Monocytes	Hematology	0.5	K/uL	0	0.9		0.5	K/uL	0	0.9		Normal				Y		Week 24			0.6	Normal	-0.1	03	Entered	56	Female	24NOV15	118	Placebo	<250 mg/day	No	No	>=250 mg/day	No	Yes	Yes	Yes	Yes
Week 24	03_004	10MAY16	7:30:00	MONOLE	Monocytes	Hematology	10	%	1	9		10	%	1	9		High				Y		Week 24			12	High	-2	03	Entered	56	Female	24NOV15	118	Placebo	<250 mg/day	No	No	>=250 mg/day	No	Yes	Yes	Yes	Yes
Week 24	03_004	10MAY16	7:30:00	NEUT	Abs Neutrophil	Hematology	3.0	K/uL	1.5	7.7		3	K/uL	1.5	7.7		Normal				Y		Week 24			3	Normal	0	03	Entered	56	Female	24NOV15	118	Placebo	<250 mg/day	No	No	>=250 mg/day	No	Yes	Yes	Yes	Yes
Week 24	03_004	10MAY16	7:30:00	NEUTLE	Neutrophils	Hematology	61	%	45	79		61	%	45	79		Normal				Y		Week 24			58	Normal	3	03	Entered	56	Female	24NOV15	118	Placebo	<250 mg/day	No	No	>=250 mg/day	No	Yes	Yes	Yes	Yes
Week 24	03_004	10MAY16	7:30:00	PLAT	Platelet Count	Hematology	281	K/uL	150	450		281	K/uL	150	450		Normal				Y		Week 24			263	Normal	18	03	Entered	56	Female	24NOV15	118	Placebo	<250 mg/day	No	No	>=250 mg/day	No	Yes	Yes	Yes	Yes
Week 24	03_004	10MAY16	7:30:00	RBC	RBC	Hematology	5.18	M/uL	3.7	5.2		5.18	M/uL	3.7	5.2		Normal				Y		Week 24			4.36	Normal	0.82	03	Entered	56	Female	24NOV15	118	Placebo	<250 mg/day	No	No	>=250 mg/day	No	Yes	Yes	Yes	Yes
Week 24	03_004	10MAY16	7:30:00	SODIUM	Sodium	Chemistry	137	mmol/L	136	145		137	mmol/L	136	145		Normal				Y		Week 24			138	Normal	-1	03	Entered	56	Female	24NOV15	118	Placebo	<250 mg/day	No	No	>=250 mg/day	No	Yes	Yes	Yes	Yes
Week 24	03_004	10MAY16	7:30:00	TRIG	Triglycerides	Chemistry	114	mg/dL		150		114	mg/dL		150		Normal				Y		Week 24			89	Normal	25	03	Entered	56	Female	24NOV15	118	Placebo	<250 mg/day	No	No	>=250 mg/day	No	Yes	Yes	Yes	Yes
Week 24	03_004	10MAY16	7:30:00	TSH	TSH	TSH	1.25	uIU/mL	0.34	5.6		1.25	uIU/mL	0.34	5.6		Normal				Y		Week 24			2.21	Normal	-0.96	03	Entered	56	Female	24NOV15	118	Placebo	<250 mg/day	No	No	>=250 mg/day	No	Yes	Yes	Yes	Yes
Week 24	03_004	10MAY16	7:30:00	WBC	WBC	Hematology	4.9	K/uL	4	11		4.9	K/uL	4	11		Normal				Y		Week 24			5.1	Normal	-0.2	03	Entered	56	Female	24NOV15	118	Placebo	<250 mg/day	No	No	>=250 mg/day	No	Yes	Yes	Yes	Yes
Screening	03_005	04NOV15	10:00:00	ALP	Alkaline Phosphatase	Liver Function Tests	84	IU/L	32	92		84	IU/L	32	92		Normal				N		Screening			72	Normal		03	Early Termination	49	Female	25NOV15	119	MF4637	>=250 mg/day	No	No	<250 mg/day	No	Yes	Yes	Yes	Yes
Screening	03_005	04NOV15	10:00:00	ALT	ALT	Liver Function Tests	22	IU/L	14	54		22	IU/L	14	54		Normal				N		Screening			16	Normal		03	Early Termination	49	Female	25NOV15	119	MF4637	>=250 mg/day	No	No	<250 mg/day	No	Yes	Yes	Yes	Yes
Screening	03_005	04NOV15	10:00:00	AST	AST	Liver Function Tests	19	IU/L	15	41		19	IU/L	15	41		Normal				N		Screening			17	Normal		03	Early Termination	49	Female	25NOV15	119	MF4637	>=250 mg/day	No	No	<250 mg/day	No	Yes	Yes	Yes	Yes
Screening	03_005	04NOV15	10:00:00	BILIT	Bilirubin Total	Liver Function Tests	0.4	mg/dL	0.3	1.2		0.4	mg/dL	0.3	1.2		Normal				N		Screening			0.3	Normal		03	Early Termination	49	Female	25NOV15	119	MF4637	>=250 mg/day	No	No	<250 mg/day	No	Yes	Yes	Yes	Yes
Screening	03_005	04NOV15	10:00:00	GGT	GGT	Liver Function Tests	16	IU/L	7	50		16	IU/L	7	50		Normal				N		Screening			14	Normal		03	Early Termination	49	Female	25NOV15	119	MF4637	>=250 mg/day	No	No	<250 mg/day	No	Yes	Yes	Yes	Yes
Screening	03_005	04NOV15	10:00:00	HCAB	Hepatitis C Antibody	Hepatitis C Antibody	NONREACT				NONREACT					NONREACT					N		Screening						03	Early Termination	49	Female	25NOV15	119	MF4637	>=250 mg/day	No	No	<250 mg/day	No	Yes	Yes	Yes	Yes
Screening	03_005	04NOV15	10:00:00	TSH	TSH	TSH	1.78	uIU/mL	0.34	5.6		1.78	uIU/mL	0.34	5.6		Normal				N		Screening			1.78	Normal		03	Early Termination	49	Female	25NOV15	119	MF4637	>=250 mg/day	No	No	<250 mg/day	No	Yes	Yes	Yes	Yes
Baseline	03_005	24NOV15	8:45:00	ALB	Albumin	Chemistry	4.2	g/dL	3.5	5.2		4.2	g/dL	3.5	5.2		Normal				Y		Baseline			4.2	Normal		03	Early Termination	49	Female	25NOV15	119	MF4637	>=250 mg/day	No	No	<250 mg/day	No	Yes	Yes	Yes	Yes
Baseline	03_005	24NOV15	8:45:00	ALP	Alkaline Phosphatase	Liver Function Tests	72	IU/L	32	92		72	IU/L	32	92		Normal				Y		Baseline			72	Normal		03	Early Termination	49	Female	25NOV15	119	MF4637	>=250 mg/day	No	No	<250 mg/day	No	Yes	Yes	Yes	Yes
Baseline	03_005	24NOV15	8:45:00	ALT	ALT	Liver Function Tests	16	IU/L	14	54		16	IU/L	14	54		Normal				Y		Baseline			16	Normal		03	Early Termination	49	Female	25NOV15	119	MF4637	>=250 mg/day	No	No	<250 mg/day	No	Yes	Yes	Yes	Yes
Baseline	03_005	24NOV15	8:45:00	AST	AST	Liver Function Tests	17	IU/L	15	41		17	IU/L	15	41		Normal				Y		Baseline			17	Normal		03	Early Termination	49	Female	25NOV15	119	MF4637	>=250 mg/day	No	No	<250 mg/day	No	Yes	Yes	Yes	Yes
Baseline	03_005	24NOV15	8:45:00	BASO	Abs Basophils	Hematology	0.1	K/uL	0	0.2		0.1	K/uL	0	0.2		Normal				Y		Baseline			0.1	Normal		03	Early Termination	49	Female	25NOV15	119	MF4637	>=250 mg/day	No	No	<250 mg/day	No	Yes	Yes	Yes	Yes
Baseline	03_005	24NOV15	8:45:00	BASOLE	Basophils	Hematology	1	%	0	2		1	%	0	2		Normal				Y		Baseline			1	Normal		03	Early Termination	49	Female	25NOV15	119	MF4637	>=250 mg/day	No	No	<250 mg/day	No	Yes	Yes	Yes	Yes
Baseline	03_005	24NOV15	8:45:00	BICARB	BiCarbonate (CO2)	Chemistry	26	mmol/L	22	32		26	mmol/L	22	32		Normal				Y		Baseline			26	Normal		03	Early Termination	49	Female	25NOV15	119	MF4637	>=250 mg/day	No	No	<250 mg/day	No	Yes	Yes	Yes	Yes
Baseline	03_005	24NOV15	8:45:00	BILIT	Bilirubin Total	Liver Function Tests	0.3	mg/dL	0.3	1.2		0.3	mg/dL	0.3	1.2		Normal				Y		Baseline			0.3	Normal		03	Early Termination	49	Female	25NOV15	119	MF4637	>=250 mg/day	No	No	<250 mg/day	No	Yes	Yes	Yes	Yes
Baseline	03_005	24NOV15	8:45:00	BUN	BUN (urea)	Chemistry	12	mg/dL	6	20		12	mg/dL	6	20		Normal				Y		Baseline			12	Normal		03	Early Termination	49	Female	25NOV15	119	MF4637	>=250 mg/day	No	No	<250 mg/day	No	Yes	Yes	Yes	Yes
Baseline	03_005	24NOV15	8:45:00	CA	Calcium	Chemistry	9.4	mg/dL	8.6	10		9.4	mg/dL	8.6	10		Normal				Y		Baseline			9.4	Normal		03	Early Termination	49	Female	25NOV15	119	MF4637	>=250 mg/day	No	No	<250 mg/day	No	Yes	Yes	Yes	Yes
Baseline	03_005	24NOV15	8:45:00	CL	Chloride	Chemistry	103	mmol/L	98	107		103	mmol/L	98	107		Normal				Y		Baseline			103	Normal		03	Early Termination	49	Female	25NOV15	119	MF4637	>=250 mg/day	No	No	<250 mg/day	No	Yes	Yes	Yes	Yes
Baseline	03_005	24NOV15	8:45:00	CREAT	Creatinine	Chemistry	1.1	mg/dL	0.6	1.1		1.1	mg/dL	0.6	1.1		Normal				Y		Baseline			1.1	Normal		03	Early Termination	49	Female	25NOV15	119	MF4637	>=250 mg/day	No	No	<250 mg/day	No	Yes	Yes	Yes	Yes
Baseline	03_005	24NOV15	8:45:00	CRPHS	hs-CRP	hs-CRP	2.32	mg/L				2.32	mg/L				Normal				Y	hs-CRP CHD risk level: low risk <1.0 mg/L intermediate risk 1.0-3.0 mg/L high risk >3.0 mg/L Values >10 mg/L suggests an inflammatory disorder requiring separate evaluation. Cardiac risk assessment is not appropriate in this context.	Baseline			2.32	Normal		03	Early Termination	49	Female	25NOV15	119	MF4637	>=250 mg/day	No	No	<250 mg/day	No	Yes	Yes	Yes	Yes
Baseline	03_005	24NOV15	8:45:00	EOS	Abs Eosinophils	Hematology	0.4	K/uL	0	0.6		0.4	K/uL	0	0.6		Normal				Y		Baseline			0.4	Normal		03	Early Termination	49	Female	25NOV15	119	MF4637	>=250 mg/day	No	No	<250 mg/day	No	Yes	Yes	Yes	Yes
Baseline	03_005	24NOV15	8:45:00	EOSLE	Eosinophils	Hematology	7	%	0	4		7	%	0	4		High				Y		Baseline			7	High		03	Early Termination	49	Female	25NOV15	119	MF4637	>=250 mg/day	No	No	<250 mg/day	No	Yes	Yes	Yes	Yes
Baseline	03_005	24NOV15	8:45:00	GGT	GGT	Liver Function Tests	14	IU/L	7	50		14	IU/L	7	50		Normal				Y		Baseline			14	Normal		03	Early Termination	49	Female	25NOV15	119	MF4637	>=250 mg/day	No	No	<250 mg/day	No	Yes	Yes	Yes	Yes
Baseline	03_005	24NOV15	8:45:00	GLUCF	Glucose Fasting	Chemistry	101	mg/dL	70	99		101	mg/dL	70	99		High				Y		Baseline			101	High		03	Early Termination	49	Female	25NOV15	119	MF4637	>=250 mg/day	No	No	<250 mg/day	No	Yes	Yes	Yes	Yes
Baseline	03_005	24NOV15	8:45:00	HCT	Hematocrit	Hematology	38.2	%	36	46		38.2	%	36	46		Normal				Y		Baseline			38.2	Normal		03	Early Termination	49	Female	25NOV15	119	MF4637	>=250 mg/day	No	No	<250 mg/day	No	Yes	Yes	Yes	Yes
Baseline	03_005	24NOV15	8:45:00	HGB	Hemoglobin	Hematology	12.4	g/dL	12	15.5		12.4	g/dL	12	15.5		Normal				Y		Baseline			12.4	Normal		03	Early Termination	49	Female	25NOV15	119	MF4637	>=250 mg/day	No	No	<250 mg/day	No	Yes	Yes	Yes	Yes
Baseline	03_005	24NOV15	8:45:00	INSULIN	Insulin	Insulin	16.6	uIU/mL	1.9	23		16.6	uIU/mL	1.9	23		Normal				Y		Baseline			16.6	Normal		03	Early Termination	49	Female	25NOV15	119	MF4637	>=250 mg/day	No	No	<250 mg/day	No	Yes	Yes	Yes	Yes
Baseline	03_005	24NOV15	8:45:00	K	Potassium	Chemistry	4.7	mmol/L	3.5	5.1		4.7	mmol/L	3.5	5.1		Normal				Y		Baseline			4.7	Normal		03	Early Termination	49	Female	25NOV15	119	MF4637	>=250 mg/day	No	No	<250 mg/day	No	Yes	Yes	Yes	Yes
Baseline	03_005	24NOV15	8:45:00	LYM	Abs Lymphocytes	Hematology	1.6	K/uL	0.8	4		1.6	K/uL	0.8	4		Normal				Y		Baseline			1.6	Normal		03	Early Termination	49	Female	25NOV15	119	MF4637	>=250 mg/day	No	No	<250 mg/day	No	Yes	Yes	Yes	Yes
Baseline	03_005	24NOV15	8:45:00	LYMLE	Lymphocytes	Hematology	28	%	20	50		28	%	20	50		Normal				Y		Baseline			28	Normal		03	Early Termination	49	Female	25NOV15	119	MF4637	>=250 mg/day	No	No	<250 mg/day	No	Yes	Yes	Yes	Yes
Baseline	03_005	24NOV15	8:45:00	MONO	Abs Monocytes	Hematology	0.5	K/uL	0	0.9		0.5	K/uL	0	0.9		Normal				Y		Baseline			0.5	Normal		03	Early Termination	49	Female	25NOV15	119	MF4637	>=250 mg/day	No	No	<250 mg/day	No	Yes	Yes	Yes	Yes
Baseline	03_005	24NOV15	8:45:00	MONOLE	Monocytes	Hematology	9	%	1	9		9	%	1	9		Normal				Y		Baseline			9	Normal		03	Early Termination	49	Female	25NOV15	119	MF4637	>=250 mg/day	No	No	<250 mg/day	No	Yes	Yes	Yes	Yes
Baseline	03_005	24NOV15	8:45:00	NEUT	Abs Neutrophil	Hematology	3.2	K/uL	1.5	7.7		3.2	K/uL	1.5	7.7		Normal				Y		Baseline			3.2	Normal		03	Early Termination	49	Female	25NOV15	119	MF4637	>=250 mg/day	No	No	<250 mg/day	No	Yes	Yes	Yes	Yes
Baseline	03_005	24NOV15	8:45:00	NEUTLE	Neutrophils	Hematology	55	%	45	79		55	%	45	79		Normal				Y		Baseline			55	Normal		03	Early Termination	49	Female	25NOV15	119	MF4637	>=250 mg/day	No	No	<250 mg/day	No	Yes	Yes	Yes	Yes
Baseline	03_005	24NOV15	8:45:00	PLAT	Platelet Count	Hematology	284	K/uL	150	450		284	K/uL	150	450		Normal				Y		Baseline			284	Normal		03	Early Termination	49	Female	25NOV15	119	MF4637	>=250 mg/day	No	No	<250 mg/day	No	Yes	Yes	Yes	Yes
Baseline	03_005	24NOV15	8:45:00	RBC	RBC	Hematology	4.26	M/uL	3.7	5.2		4.26	M/uL	3.7	5.2		Normal				Y		Baseline			4.26	Normal		03	Early Termination	49	Female	25NOV15	119	MF4637	>=250 mg/day	No	No	<250 mg/day	No	Yes	Yes	Yes	Yes
Baseline	03_005	24NOV15	8:45:00	SODIUM	Sodium	Chemistry	138	mmol/L	136	145		138	mmol/L	136	145		Normal				Y		Baseline			138	Normal		03	Early Termination	49	Female	25NOV15	119	MF4637	>=250 mg/day	No	No	<250 mg/day	No	Yes	Yes	Yes	Yes
Baseline	03_005	24NOV15	8:45:00	TRIG	Triglycerides	Chemistry	63	mg/dL		150		63	mg/dL		150		Normal				Y		Baseline			63	Normal		03	Early Termination	49	Female	25NOV15	119	MF4637	>=250 mg/day	No	No	<250 mg/day	No	Yes	Yes	Yes	Yes
Baseline	03_005	24NOV15	8:45:00	WBC	WBC	Hematology	5.8	K/uL	4	11		5.8	K/uL	4	11		Normal				Y		Baseline			5.8	Normal		03	Early Termination	49	Female	25NOV15	119	MF4637	>=250 mg/day	No	No	<250 mg/day	No	Yes	Yes	Yes	Yes
Week 12	03_005	26FEB16	8:15:00	ALP	Alkaline Phosphatase	Liver Function Tests	83	IU/L	32	92		83	IU/L	32	92		Normal				N		Week 12			72	Normal	11	03	Early Termination	49	Female	25NOV15	119	MF4637	>=250 mg/day	No	No	<250 mg/day	No	Yes	Yes	Yes	Yes
Week 12	03_005	26FEB16	8:15:00	ALT	ALT	Liver Function Tests	17	IU/L	14	54		17	IU/L	14	54		Normal				N		Week 12			16	Normal	1	03	Early Termination	49	Female	25NOV15	119	MF4637	>=250 mg/day	No	No	<250 mg/day	No	Yes	Yes	Yes	Yes
Week 12	03_005	26FEB16	8:15:00	AST	AST	Liver Function Tests	16	IU/L	15	41		16	IU/L	15	41		Normal				N		Week 12			17	Normal	-1	03	Early Termination	49	Female	25NOV15	119	MF4637	>=250 mg/day	No	No	<250 mg/day	No	Yes	Yes	Yes	Yes
Week 12	03_005	26FEB16	8:15:00	BILIT	Bilirubin Total	Liver Function Tests	0.2	mg/dL	0.3	1.2		0.2	mg/dL	0.3	1.2		Low				N		Week 12			0.3	Normal	-0.1	03	Early Termination	49	Female	25NOV15	119	MF4637	>=250 mg/day	No	No	<250 mg/day	No	Yes	Yes	Yes	Yes
Week 12	03_005	26FEB16	8:15:00	GGT	GGT	Liver Function Tests	16	IU/L	7	50		16	IU/L	7	50		Normal				N		Week 12			14	Normal	2	03	Early Termination	49	Female	25NOV15	119	MF4637	>=250 mg/day	No	No	<250 mg/day	No	Yes	Yes	Yes	Yes
Early Termination	03_005	07APR16	14:30:00	ALB	Albumin	Chemistry	4.7	g/dL	3.5	5.2		4.7	g/dL	3.5	5.2		Normal				N		Early Termination			4.2	Normal	0.5	03	Early Termination	49	Female	25NOV15	119	MF4637	>=250 mg/day	No	No	<250 mg/day	No	Yes	Yes	Yes	Yes
Early Termination	03_005	07APR16	14:30:00	ALP	Alkaline Phosphatase	Liver Function Tests	82	IU/L	32	92		82	IU/L	32	92		Normal				N		Early Termination			72	Normal	10	03	Early Termination	49	Female	25NOV15	119	MF4637	>=250 mg/day	No	No	<250 mg/day	No	Yes	Yes	Yes	Yes
Early Termination	03_005	07APR16	14:30:00	ALT	ALT	Liver Function Tests	18	IU/L	14	54		18	IU/L	14	54		Normal				N		Early Termination			16	Normal	2	03	Early Termination	49	Female	25NOV15	119	MF4637	>=250 mg/day	No	No	<250 mg/day	No	Yes	Yes	Yes	Yes
Early Termination	03_005	07APR16	14:30:00	AST	AST	Liver Function Tests	19	IU/L	15	41		19	IU/L	15	41		Normal				N		Early Termination			17	Normal	2	03	Early Termination	49	Female	25NOV15	119	MF4637	>=250 mg/day	No	No	<250 mg/day	No	Yes	Yes	Yes	Yes
Early Termination	03_005	07APR16	14:30:00	BASO	Abs Basophils	Hematology	0.1	K/uL	0	0.2		0.1	K/uL	0	0.2		Normal				N		Early Termination			0.1	Normal	0	03	Early Termination	49	Female	25NOV15	119	MF4637	>=250 mg/day	No	No	<250 mg/day	No	Yes	Yes	Yes	Yes
Early Termination	03_005	07APR16	14:30:00	BASOLE	Basophils	Hematology	1	%	0	2		1	%	0	2		Normal				N		Early Termination			1	Normal	0	03	Early Termination	49	Female	25NOV15	119	MF4637	>=250 mg/day	No	No	<250 mg/day	No	Yes	Yes	Yes	Yes
Early Termination	03_005	07APR16	14:30:00	BICARB	BiCarbonate (CO2)	Chemistry	21	mmol/L	22	32		21	mmol/L	22	32		Low				N		Early Termination			26	Normal	-5	03	Early Termination	49	Female	25NOV15	119	MF4637	>=250 mg/day	No	No	<250 mg/day	No	Yes	Yes	Yes	Yes
Early Termination	03_005	07APR16	14:30:00	BILIT	Bilirubin Total	Liver Function Tests	0.3	mg/dL	0.3	1.2		0.3	mg/dL	0.3	1.2		Normal				N		Early Termination			0.3	Normal	0	03	Early Termination	49	Female	25NOV15	119	MF4637	>=250 mg/day	No	No	<250 mg/day	No	Yes	Yes	Yes	Yes
Early Termination	03_005	07APR16	14:30:00	BUN	BUN (urea)	Chemistry	13	mg/dL	6	20		13	mg/dL	6	20		Normal				N		Early Termination			12	Normal	1	03	Early Termination	49	Female	25NOV15	119	MF4637	>=250 mg/day	No	No	<250 mg/day	No	Yes	Yes	Yes	Yes
Early Termination	03_005	07APR16	14:30:00	CA	Calcium	Chemistry	9.1	mg/dL	8.6	10		9.1	mg/dL	8.6	10		Normal				N		Early Termination			9.4	Normal	-0.3	03	Early Termination	49	Female	25NOV15	119	MF4637	>=250 mg/day	No	No	<250 mg/day	No	Yes	Yes	Yes	Yes
Early Termination	03_005	07APR16	14:30:00	CL	Chloride	Chemistry	104	mmol/L	98	107		104	mmol/L	98	107		Normal				N		Early Termination			103	Normal	1	03	Early Termination	49	Female	25NOV15	119	MF4637	>=250 mg/day	No	No	<250 mg/day	No	Yes	Yes	Yes	Yes
Early Termination	03_005	07APR16	14:30:00	CREAT	Creatinine	Chemistry	1.1	mg/dL	0.6	1.1		1.1	mg/dL	0.6	1.1		Normal				N		Early Termination			1.1	Normal	0	03	Early Termination	49	Female	25NOV15	119	MF4637	>=250 mg/day	No	No	<250 mg/day	No	Yes	Yes	Yes	Yes
Early Termination	03_005	07APR16	14:30:00	CRPHS	hs-CRP	hs-CRP	2.98	mg/L				2.98	mg/L				Normal				N	hs-CRP CHD risk level: low risk <1.0 mg/L intermediate risk 1.0-3.0 mg/L high risk >3.0 mg/L Values >10 mg/L suggests an inflammatory disorder requiring separate evaluation. Cardiac risk assessment is not appropriate in this context.	Early Termination			2.32	Normal	0.66	03	Early Termination	49	Female	25NOV15	119	MF4637	>=250 mg/day	No	No	<250 mg/day	No	Yes	Yes	Yes	Yes
Early Termination	03_005	07APR16	14:30:00	EOS	Abs Eosinophils	Hematology	0.1	K/uL	0	0.6		0.1	K/uL	0	0.6		Normal				N		Early Termination			0.4	Normal	-0.3	03	Early Termination	49	Female	25NOV15	119	MF4637	>=250 mg/day	No	No	<250 mg/day	No	Yes	Yes	Yes	Yes
Early Termination	03_005	07APR16	14:30:00	EOSLE	Eosinophils	Hematology	1	%	0	4		1	%	0	4		Normal				N		Early Termination			7	High	-6	03	Early Termination	49	Female	25NOV15	119	MF4637	>=250 mg/day	No	No	<250 mg/day	No	Yes	Yes	Yes	Yes
Early Termination	03_005	07APR16	14:30:00	GGT	GGT	Liver Function Tests	15	IU/L	7	50		15	IU/L	7	50		Normal				N		Early Termination			14	Normal	1	03	Early Termination	49	Female	25NOV15	119	MF4637	>=250 mg/day	No	No	<250 mg/day	No	Yes	Yes	Yes	Yes
Early Termination	03_005	07APR16	14:30:00	GLUC	Glucose Random	Chemistry	90	mg/dL	70	139		90	mg/dL	70	139		Normal				N		Early Termination						03	Early Termination	49	Female	25NOV15	119	MF4637	>=250 mg/day	No	No	<250 mg/day	No	Yes	Yes	Yes	Yes
Early Termination	03_005	07APR16	14:30:00	HBA1C	HbA1c	HbA1c	5.7	%	4	5.6		5.7	%	4	5.6		High				N	INTERPRETIVE INFORMATION: Hemoglobin A1cHemoglobin A1c values of 5.7-6.4 percent indicate an increasedrisk for developing diabetes mellitus. Hemoglobin A1c valuesgreater than or equal to 6.5 percent are diagnostic of diabetesmellitus. Diagnosis should be confirmed by repeating the Hb A1ctest.This boronate affinity Hb A1c method provides accurate analyticalresults in the presence of nearly all hem…	Early Termination						03	Early Termination	49	Female	25NOV15	119	MF4637	>=250 mg/day	No	No	<250 mg/day	No	Yes	Yes	Yes	Yes
Early Termination	03_005	07APR16	14:30:00	HCT	Hematocrit	Hematology	37.8	%	36	46		37.8	%	36	46		Normal				N		Early Termination			38.2	Normal	-0.4	03	Early Termination	49	Female	25NOV15	119	MF4637	>=250 mg/day	No	No	<250 mg/day	No	Yes	Yes	Yes	Yes
Early Termination	03_005	07APR16	14:30:00	HGB	Hemoglobin	Hematology	12.5	g/dL	12	15.5		12.5	g/dL	12	15.5		Normal				N		Early Termination			12.4	Normal	0.1	03	Early Termination	49	Female	25NOV15	119	MF4637	>=250 mg/day	No	No	<250 mg/day	No	Yes	Yes	Yes	Yes
Early Termination	03_005	07APR16	14:30:00	INSULIN	Insulin	Insulin	6.5	uIU/mL	1.9	23		6.5	uIU/mL	1.9	23		Normal				N		Early Termination			16.6	Normal	-10.1	03	Early Termination	49	Female	25NOV15	119	MF4637	>=250 mg/day	No	No	<250 mg/day	No	Yes	Yes	Yes	Yes
Early Termination	03_005	07APR16	14:30:00	K	Potassium	Chemistry	4.1	mmol/L	3.5	5.1		4.1	mmol/L	3.5	5.1		Normal				N		Early Termination			4.7	Normal	-0.6	03	Early Termination	49	Female	25NOV15	119	MF4637	>=250 mg/day	No	No	<250 mg/day	No	Yes	Yes	Yes	Yes
Early Termination	03_005	07APR16	14:30:00	LYM	Abs Lymphocytes	Hematology	2.0	K/uL	0.8	4		2	K/uL	0.8	4		Normal				N		Early Termination			1.6	Normal	0.4	03	Early Termination	49	Female	25NOV15	119	MF4637	>=250 mg/day	No	No	<250 mg/day	No	Yes	Yes	Yes	Yes
Early Termination	03_005	07APR16	14:30:00	LYMLE	Lymphocytes	Hematology	32	%	20	50		32	%	20	50		Normal				N		Early Termination			28	Normal	4	03	Early Termination	49	Female	25NOV15	119	MF4637	>=250 mg/day	No	No	<250 mg/day	No	Yes	Yes	Yes	Yes
Early Termination	03_005	07APR16	14:30:00	MONO	Abs Monocytes	Hematology	0.6	K/uL	0	0.9		0.6	K/uL	0	0.9		Normal				N		Early Termination			0.5	Normal	0.1	03	Early Termination	49	Female	25NOV15	119	MF4637	>=250 mg/day	No	No	<250 mg/day	No	Yes	Yes	Yes	Yes
Early Termination	03_005	07APR16	14:30:00	MONOLE	Monocytes	Hematology	9	%	1	9		9	%	1	9		Normal				N		Early Termination			9	Normal	0	03	Early Termination	49	Female	25NOV15	119	MF4637	>=250 mg/day	No	No	<250 mg/day	No	Yes	Yes	Yes	Yes
Early Termination	03_005	07APR16	14:30:00	NEUT	Abs Neutrophil	Hematology	3.6	K/uL	1.5	7.7		3.6	K/uL	1.5	7.7		Normal				N		Early Termination			3.2	Normal	0.4	03	Early Termination	49	Female	25NOV15	119	MF4637	>=250 mg/day	No	No	<250 mg/day	No	Yes	Yes	Yes	Yes
Early Termination	03_005	07APR16	14:30:00	NEUTLE	Neutrophils	Hematology	57	%	45	79		57	%	45	79		Normal				N		Early Termination			55	Normal	2	03	Early Termination	49	Female	25NOV15	119	MF4637	>=250 mg/day	No	No	<250 mg/day	No	Yes	Yes	Yes	Yes
Early Termination	03_005	07APR16	14:30:00	PLAT	Platelet Count	Hematology	269	K/uL	150	450		269	K/uL	150	450		Normal				N		Early Termination			284	Normal	-15	03	Early Termination	49	Female	25NOV15	119	MF4637	>=250 mg/day	No	No	<250 mg/day	No	Yes	Yes	Yes	Yes
Early Termination	03_005	07APR16	14:30:00	RBC	RBC	Hematology	4.38	M/uL	3.7	5.2		4.38	M/uL	3.7	5.2		Normal				N		Early Termination			4.26	Normal	0.12	03	Early Termination	49	Female	25NOV15	119	MF4637	>=250 mg/day	No	No	<250 mg/day	No	Yes	Yes	Yes	Yes
Early Termination	03_005	07APR16	14:30:00	SODIUM	Sodium	Chemistry	137	mmol/L	136	145		137	mmol/L	136	145		Normal				N		Early Termination			138	Normal	-1	03	Early Termination	49	Female	25NOV15	119	MF4637	>=250 mg/day	No	No	<250 mg/day	No	Yes	Yes	Yes	Yes
Early Termination	03_005	07APR16	14:30:00	TRIG	Triglycerides	Chemistry	54	mg/dL		150		54	mg/dL		150		Normal				N		Early Termination			63	Normal	-9	03	Early Termination	49	Female	25NOV15	119	MF4637	>=250 mg/day	No	No	<250 mg/day	No	Yes	Yes	Yes	Yes
Early Termination	03_005	07APR16	14:30:00	TSH	TSH	TSH	2.77	uIU/mL	0.34	5.6		2.77	uIU/mL	0.34	5.6		Normal				N		Early Termination			1.78	Normal	0.99	03	Early Termination	49	Female	25NOV15	119	MF4637	>=250 mg/day	No	No	<250 mg/day	No	Yes	Yes	Yes	Yes
Early Termination	03_005	07APR16	14:30:00	WBC	WBC	Hematology	6.3	K/uL	4	11		6.3	K/uL	4	11		Normal				N		Early Termination			5.8	Normal	0.5	03	Early Termination	49	Female	25NOV15	119	MF4637	>=250 mg/day	No	No	<250 mg/day	No	Yes	Yes	Yes	Yes
Screening	03_007	11NOV15	13:00:00	ALP	Alkaline Phosphatase	Liver Function Tests	72	IU/L	32	92		72	IU/L	32	92		Normal				N		Screening			80	Normal		03	Entered	40	Male	19NOV15	120	Placebo	<250 mg/day	No	No	<250 mg/day	No	Yes	Yes	Yes	No
Screening	03_007	11NOV15	13:00:00	ALT	ALT	Liver Function Tests	32	IU/L	17	63		32	IU/L	17	63		Normal				N		Screening			30	Normal		03	Entered	40	Male	19NOV15	120	Placebo	<250 mg/day	No	No	<250 mg/day	No	Yes	Yes	Yes	No
Screening	03_007	11NOV15	13:00:00	AST	AST	Liver Function Tests	21	IU/L	15	41		21	IU/L	15	41		Normal				N		Screening			17	Normal		03	Entered	40	Male	19NOV15	120	Placebo	<250 mg/day	No	No	<250 mg/day	No	Yes	Yes	Yes	No
Screening	03_007	11NOV15	13:00:00	BILIT	Bilirubin Total	Liver Function Tests	0.5	mg/dL	0.3	1.2		0.5	mg/dL	0.3	1.2		Normal				N		Screening			0.4	Normal		03	Entered	40	Male	19NOV15	120	Placebo	<250 mg/day	No	No	<250 mg/day	No	Yes	Yes	Yes	No
Screening	03_007	11NOV15	13:00:00	GGT	GGT	Liver Function Tests	52	IU/L	7	50		52	IU/L	7	50		High				N		Screening			54	High		03	Entered	40	Male	19NOV15	120	Placebo	<250 mg/day	No	No	<250 mg/day	No	Yes	Yes	Yes	No
Screening	03_007	11NOV15	13:00:00	HBA1C	HbA1c	HbA1c	5.7	%	4	5.6		5.7	%	4	5.6		High				N	INTERPRETIVE INFORMATION: Hemoglobin A1cHemoglobin A1c values of 5.7-6.4 percent indicate an increasedrisk for developing diabetes mellitus. Hemoglobin A1c valuesgreater than or equal to 6.5 percent are diagnostic of diabetesmellitus. Diagnosis should be confirmed by repeating the Hb A1ctest.This boronate affinity Hb A1c method provides accurate analyticalresults in the presence of nearly all hem…	Screening			5.7	High		03	Entered	40	Male	19NOV15	120	Placebo	<250 mg/day	No	No	<250 mg/day	No	Yes	Yes	Yes	No
Screening	03_007	11NOV15	13:00:00	HCAB	Hepatitis C Antibody	Hepatitis C Antibody	NONREACT				NONREACT					NONREACT					N		Screening						03	Entered	40	Male	19NOV15	120	Placebo	<250 mg/day	No	No	<250 mg/day	No	Yes	Yes	Yes	No
Screening	03_007	11NOV15	13:00:00	TSH	TSH	TSH	1.03	uIU/mL	0.34	5.6		1.03	uIU/mL	0.34	5.6		Normal				N		Screening			1.03	Normal		03	Entered	40	Male	19NOV15	120	Placebo	<250 mg/day	No	No	<250 mg/day	No	Yes	Yes	Yes	No
Baseline	03_007	18NOV15	10:00:00	ALB	Albumin	Chemistry	4.5	g/dL	3.5	5.2		4.5	g/dL	3.5	5.2		Normal				N		Baseline			4.5	Normal		03	Entered	40	Male	19NOV15	120	Placebo	<250 mg/day	No	No	<250 mg/day	No	Yes	Yes	Yes	No
Baseline	03_007	18NOV15	10:00:00	ALP	Alkaline Phosphatase	Liver Function Tests	80	IU/L	32	92		80	IU/L	32	92		Normal				N		Baseline			80	Normal		03	Entered	40	Male	19NOV15	120	Placebo	<250 mg/day	No	No	<250 mg/day	No	Yes	Yes	Yes	No
Baseline	03_007	18NOV15	10:00:00	ALT	ALT	Liver Function Tests	30	IU/L	17	63		30	IU/L	17	63		Normal				N		Baseline			30	Normal		03	Entered	40	Male	19NOV15	120	Placebo	<250 mg/day	No	No	<250 mg/day	No	Yes	Yes	Yes	No
Baseline	03_007	18NOV15	10:00:00	AST	AST	Liver Function Tests	17	IU/L	15	41		17	IU/L	15	41		Normal				N		Baseline			17	Normal		03	Entered	40	Male	19NOV15	120	Placebo	<250 mg/day	No	No	<250 mg/day	No	Yes	Yes	Yes	No
Baseline	03_007	18NOV15	10:00:00	BASO	Abs Basophils	Hematology	0.0	K/uL	0	0.2		0	K/uL	0	0.2		Normal				N		Baseline			0	Normal		03	Entered	40	Male	19NOV15	120	Placebo	<250 mg/day	No	No	<250 mg/day	No	Yes	Yes	Yes	No
Baseline	03_007	18NOV15	10:00:00	BASOLE	Basophils	Hematology	0	%	0	2		0	%	0	2		Normal				N		Baseline			0	Normal		03	Entered	40	Male	19NOV15	120	Placebo	<250 mg/day	No	No	<250 mg/day	No	Yes	Yes	Yes	No
Baseline	03_007	18NOV15	10:00:00	BICARB	BiCarbonate (CO2)	Chemistry	23	mmol/L	22	32		23	mmol/L	22	32		Normal				N		Baseline			23	Normal		03	Entered	40	Male	19NOV15	120	Placebo	<250 mg/day	No	No	<250 mg/day	No	Yes	Yes	Yes	No
Baseline	03_007	18NOV15	10:00:00	BILIT	Bilirubin Total	Liver Function Tests	0.4	mg/dL	0.3	1.2		0.4	mg/dL	0.3	1.2		Normal				N		Baseline			0.4	Normal		03	Entered	40	Male	19NOV15	120	Placebo	<250 mg/day	No	No	<250 mg/day	No	Yes	Yes	Yes	No
Baseline	03_007	18NOV15	10:00:00	BUN	BUN (urea)	Chemistry	12	mg/dL	6	20		12	mg/dL	6	20		Normal				N		Baseline			12	Normal		03	Entered	40	Male	19NOV15	120	Placebo	<250 mg/day	No	No	<250 mg/day	No	Yes	Yes	Yes	No
Baseline	03_007	18NOV15	10:00:00	CA	Calcium	Chemistry	9.9	mg/dL	8.6	10		9.9	mg/dL	8.6	10		Normal				N		Baseline			9.9	Normal		03	Entered	40	Male	19NOV15	120	Placebo	<250 mg/day	No	No	<250 mg/day	No	Yes	Yes	Yes	No
Baseline	03_007	18NOV15	10:00:00	CL	Chloride	Chemistry	103	mmol/L	98	107		103	mmol/L	98	107		Normal				N		Baseline			103	Normal		03	Entered	40	Male	19NOV15	120	Placebo	<250 mg/day	No	No	<250 mg/day	No	Yes	Yes	Yes	No
Baseline	03_007	18NOV15	10:00:00	CREAT	Creatinine	Chemistry	1.0	mg/dL	0.9	1.3		1	mg/dL	0.9	1.3		Normal				N		Baseline			1	Normal		03	Entered	40	Male	19NOV15	120	Placebo	<250 mg/day	No	No	<250 mg/day	No	Yes	Yes	Yes	No
Baseline	03_007	18NOV15	10:00:00	CRPHS	hs-CRP	hs-CRP	2.88	mg/L				2.88	mg/L				Normal				N	hs-CRP CHD risk level: low risk <1.0 mg/L intermediate risk 1.0-3.0 mg/L high risk >3.0 mg/L Values >10 mg/L suggests an inflammatory disorder requiring separate evaluation. Cardiac risk assessment is not appropriate in this context.	Baseline			2.88	Normal		03	Entered	40	Male	19NOV15	120	Placebo	<250 mg/day	No	No	<250 mg/day	No	Yes	Yes	Yes	No
Baseline	03_007	18NOV15	10:00:00	EOS	Abs Eosinophils	Hematology	0.2	K/uL	0	0.6		0.2	K/uL	0	0.6		Normal				N		Baseline			0.2	Normal		03	Entered	40	Male	19NOV15	120	Placebo	<250 mg/day	No	No	<250 mg/day	No	Yes	Yes	Yes	No
Baseline	03_007	18NOV15	10:00:00	EOSLE	Eosinophils	Hematology	3	%	0	4		3	%	0	4		Normal				N		Baseline			3	Normal		03	Entered	40	Male	19NOV15	120	Placebo	<250 mg/day	No	No	<250 mg/day	No	Yes	Yes	Yes	No
Baseline	03_007	18NOV15	10:00:00	GGT	GGT	Liver Function Tests	54	IU/L	7	50		54	IU/L	7	50		High				N		Baseline			54	High		03	Entered	40	Male	19NOV15	120	Placebo	<250 mg/day	No	No	<250 mg/day	No	Yes	Yes	Yes	No
Baseline	03_007	18NOV15	10:00:00	GLUC	Glucose Random	Chemistry	103	mg/dL	70	139		103	mg/dL	70	139		Normal				N		Baseline			103	Normal		03	Entered	40	Male	19NOV15	120	Placebo	<250 mg/day	No	No	<250 mg/day	No	Yes	Yes	Yes	No
Baseline	03_007	18NOV15	10:00:00	HCT	Hematocrit	Hematology	49.0	%	38	53		49	%	38	53		Normal				N		Baseline			49	Normal		03	Entered	40	Male	19NOV15	120	Placebo	<250 mg/day	No	No	<250 mg/day	No	Yes	Yes	Yes	No
Baseline	03_007	18NOV15	10:00:00	HGB	Hemoglobin	Hematology	15.3	g/dL	13.5	17.5		15.3	g/dL	13.5	17.5		Normal				N		Baseline			15.3	Normal		03	Entered	40	Male	19NOV15	120	Placebo	<250 mg/day	No	No	<250 mg/day	No	Yes	Yes	Yes	No
Baseline	03_007	18NOV15	10:00:00	INSULIN	Insulin	Insulin	27.2	uIU/mL	1.9	23		27.2	uIU/mL	1.9	23		High				N		Baseline			27.2	High		03	Entered	40	Male	19NOV15	120	Placebo	<250 mg/day	No	No	<250 mg/day	No	Yes	Yes	Yes	No
Baseline	03_007	18NOV15	10:00:00	K	Potassium	Chemistry	4.8	mmol/L	3.5	5.1		4.8	mmol/L	3.5	5.1		Normal				N		Baseline			4.8	Normal		03	Entered	40	Male	19NOV15	120	Placebo	<250 mg/day	No	No	<250 mg/day	No	Yes	Yes	Yes	No
Baseline	03_007	18NOV15	10:00:00	LYM	Abs Lymphocytes	Hematology	1.6	K/uL	0.8	4		1.6	K/uL	0.8	4		Normal				N		Baseline			1.6	Normal		03	Entered	40	Male	19NOV15	120	Placebo	<250 mg/day	No	No	<250 mg/day	No	Yes	Yes	Yes	No
Baseline	03_007	18NOV15	10:00:00	LYMLE	Lymphocytes	Hematology	21	%	20	50		21	%	20	50		Normal				N		Baseline			21	Normal		03	Entered	40	Male	19NOV15	120	Placebo	<250 mg/day	No	No	<250 mg/day	No	Yes	Yes	Yes	No
Baseline	03_007	18NOV15	10:00:00	MONO	Abs Monocytes	Hematology	0.5	K/uL	0	0.9		0.5	K/uL	0	0.9		Normal				N		Baseline			0.5	Normal		03	Entered	40	Male	19NOV15	120	Placebo	<250 mg/day	No	No	<250 mg/day	No	Yes	Yes	Yes	No
Baseline	03_007	18NOV15	10:00:00	MONOLE	Monocytes	Hematology	7	%	1	9		7	%	1	9		Normal				N		Baseline			7	Normal		03	Entered	40	Male	19NOV15	120	Placebo	<250 mg/day	No	No	<250 mg/day	No	Yes	Yes	Yes	No
Baseline	03_007	18NOV15	10:00:00	NEUT	Abs Neutrophil	Hematology	5.2	K/uL	1.5	7.7		5.2	K/uL	1.5	7.7		Normal				N		Baseline			5.2	Normal		03	Entered	40	Male	19NOV15	120	Placebo	<250 mg/day	No	No	<250 mg/day	No	Yes	Yes	Yes	No
Baseline	03_007	18NOV15	10:00:00	NEUTLE	Neutrophils	Hematology	69	%	45	79		69	%	45	79		Normal				N		Baseline			69	Normal		03	Entered	40	Male	19NOV15	120	Placebo	<250 mg/day	No	No	<250 mg/day	No	Yes	Yes	Yes	No
Baseline	03_007	18NOV15	10:00:00	PLAT	Platelet Count	Hematology	232	K/uL	150	450		232	K/uL	150	450		Normal				N		Baseline			232	Normal		03	Entered	40	Male	19NOV15	120	Placebo	<250 mg/day	No	No	<250 mg/day	No	Yes	Yes	Yes	No
Baseline	03_007	18NOV15	10:00:00	RBC	RBC	Hematology	5.23	M/uL	4.3	5.8		5.23	M/uL	4.3	5.8		Normal				N		Baseline			5.23	Normal		03	Entered	40	Male	19NOV15	120	Placebo	<250 mg/day	No	No	<250 mg/day	No	Yes	Yes	Yes	No
Baseline	03_007	18NOV15	10:00:00	SODIUM	Sodium	Chemistry	141	mmol/L	136	145		141	mmol/L	136	145		Normal				N		Baseline			141	Normal		03	Entered	40	Male	19NOV15	120	Placebo	<250 mg/day	No	No	<250 mg/day	No	Yes	Yes	Yes	No
Baseline	03_007	18NOV15	10:00:00	TRIG	Triglycerides	Chemistry	254	mg/dL		150		254	mg/dL		150		High				N		Baseline			254	High		03	Entered	40	Male	19NOV15	120	Placebo	<250 mg/day	No	No	<250 mg/day	No	Yes	Yes	Yes	No
Baseline	03_007	18NOV15	10:00:00	WBC	WBC	Hematology	7.6	K/uL	4	11		7.6	K/uL	4	11		Normal				N		Baseline			7.6	Normal		03	Entered	40	Male	19NOV15	120	Placebo	<250 mg/day	No	No	<250 mg/day	No	Yes	Yes	Yes	No
Week 12	03_007	26FEB16	9:30:00	ALP	Alkaline Phosphatase	Liver Function Tests	71	IU/L	32	92		71	IU/L	32	92		Normal				N		Week 12			80	Normal	-9	03	Entered	40	Male	19NOV15	120	Placebo	<250 mg/day	No	No	<250 mg/day	No	Yes	Yes	Yes	No
Week 12	03_007	26FEB16	9:30:00	ALT	ALT	Liver Function Tests	30	IU/L	17	63		30	IU/L	17	63		Normal				N		Week 12			30	Normal	0	03	Entered	40	Male	19NOV15	120	Placebo	<250 mg/day	No	No	<250 mg/day	No	Yes	Yes	Yes	No
Week 12	03_007	26FEB16	9:30:00	AST	AST	Liver Function Tests	17	IU/L	15	41		17	IU/L	15	41		Normal				N		Week 12			17	Normal	0	03	Entered	40	Male	19NOV15	120	Placebo	<250 mg/day	No	No	<250 mg/day	No	Yes	Yes	Yes	No
Week 12	03_007	26FEB16	9:30:00	BILIT	Bilirubin Total	Liver Function Tests	0.3	mg/dL	0.3	1.2		0.3	mg/dL	0.3	1.2		Normal				N		Week 12			0.4	Normal	-0.1	03	Entered	40	Male	19NOV15	120	Placebo	<250 mg/day	No	No	<250 mg/day	No	Yes	Yes	Yes	No
Week 12	03_007	26FEB16	9:30:00	GGT	GGT	Liver Function Tests	41	IU/L	7	50		41	IU/L	7	50		Normal				N		Week 12			54	High	-13	03	Entered	40	Male	19NOV15	120	Placebo	<250 mg/day	No	No	<250 mg/day	No	Yes	Yes	Yes	No
Week 24	03_007	01JUN16	9:00:00	ALB	Albumin	Chemistry	4.1	g/dL	3.5	5.2		4.1	g/dL	3.5	5.2		Normal				Y		Week 24			4.5	Normal	-0.4	03	Entered	40	Male	19NOV15	120	Placebo	<250 mg/day	No	No	<250 mg/day	No	Yes	Yes	Yes	No
Week 24	03_007	01JUN16	9:00:00	ALP	Alkaline Phosphatase	Liver Function Tests	82	IU/L	32	92		82	IU/L	32	92		Normal				Y		Week 24			80	Normal	2	03	Entered	40	Male	19NOV15	120	Placebo	<250 mg/day	No	No	<250 mg/day	No	Yes	Yes	Yes	No
Week 24	03_007	01JUN16	9:00:00	ALT	ALT	Liver Function Tests	31	IU/L	17	63		31	IU/L	17	63		Normal				Y		Week 24			30	Normal	1	03	Entered	40	Male	19NOV15	120	Placebo	<250 mg/day	No	No	<250 mg/day	No	Yes	Yes	Yes	No
Week 24	03_007	01JUN16	9:00:00	AST	AST	Liver Function Tests	20	IU/L	15	41		20	IU/L	15	41		Normal				Y		Week 24			17	Normal	3	03	Entered	40	Male	19NOV15	120	Placebo	<250 mg/day	No	No	<250 mg/day	No	Yes	Yes	Yes	No
Week 24	03_007	01JUN16	9:00:00	BASO	Abs Basophils	Hematology	0.0	K/uL	0	0.2		0	K/uL	0	0.2		Normal				Y		Week 24			0	Normal	0	03	Entered	40	Male	19NOV15	120	Placebo	<250 mg/day	No	No	<250 mg/day	No	Yes	Yes	Yes	No
Week 24	03_007	01JUN16	9:00:00	BASOLE	Basophils	Hematology	0	%	0	2		0	%	0	2		Normal				Y		Week 24			0	Normal	0	03	Entered	40	Male	19NOV15	120	Placebo	<250 mg/day	No	No	<250 mg/day	No	Yes	Yes	Yes	No
Week 24	03_007	01JUN16	9:00:00	BICARB	BiCarbonate (CO2)	Chemistry	22	mmol/L	22	32		22	mmol/L	22	32		Normal				Y		Week 24			23	Normal	-1	03	Entered	40	Male	19NOV15	120	Placebo	<250 mg/day	No	No	<250 mg/day	No	Yes	Yes	Yes	No
Week 24	03_007	01JUN16	9:00:00	BILIT	Bilirubin Total	Liver Function Tests	0.4	mg/dL	0.3	1.2		0.4	mg/dL	0.3	1.2		Normal				Y		Week 24			0.4	Normal	0	03	Entered	40	Male	19NOV15	120	Placebo	<250 mg/day	No	No	<250 mg/day	No	Yes	Yes	Yes	No
Week 24	03_007	01JUN16	9:00:00	BUN	BUN (urea)	Chemistry	11	mg/dL	6	20		11	mg/dL	6	20		Normal				Y		Week 24			12	Normal	-1	03	Entered	40	Male	19NOV15	120	Placebo	<250 mg/day	No	No	<250 mg/day	No	Yes	Yes	Yes	No
Week 24	03_007	01JUN16	9:00:00	CA	Calcium	Chemistry	8.9	mg/dL	8.6	10		8.9	mg/dL	8.6	10		Normal				Y		Week 24			9.9	Normal	-1	03	Entered	40	Male	19NOV15	120	Placebo	<250 mg/day	No	No	<250 mg/day	No	Yes	Yes	Yes	No
Week 24	03_007	01JUN16	9:00:00	CL	Chloride	Chemistry	103	mmol/L	98	107		103	mmol/L	98	107		Normal				Y		Week 24			103	Normal	0	03	Entered	40	Male	19NOV15	120	Placebo	<250 mg/day	No	No	<250 mg/day	No	Yes	Yes	Yes	No
Week 24	03_007	01JUN16	9:00:00	CREAT	Creatinine	Chemistry	0.9	mg/dL	0.9	1.3		0.9	mg/dL	0.9	1.3		Normal				Y		Week 24			1	Normal	-0.1	03	Entered	40	Male	19NOV15	120	Placebo	<250 mg/day	No	No	<250 mg/day	No	Yes	Yes	Yes	No
Week 24	03_007	01JUN16	9:00:00	CRPHS	hs-CRP	hs-CRP	2.30	mg/L				2.3	mg/L				Normal				Y	hs-CRP CHD risk level: low risk <1.0 mg/L intermediate risk 1.0-3.0 mg/L high risk >3.0 mg/L Values >10 mg/L suggests an inflammatory disorder requiring separate evaluation. Cardiac risk assessment is not appropriate in this context.	Week 24			2.88	Normal	-0.58	03	Entered	40	Male	19NOV15	120	Placebo	<250 mg/day	No	No	<250 mg/day	No	Yes	Yes	Yes	No
Week 24	03_007	01JUN16	9:00:00	EOS	Abs Eosinophils	Hematology	0.4	K/uL	0	0.6		0.4	K/uL	0	0.6		Normal				Y		Week 24			0.2	Normal	0.2	03	Entered	40	Male	19NOV15	120	Placebo	<250 mg/day	No	No	<250 mg/day	No	Yes	Yes	Yes	No
Week 24	03_007	01JUN16	9:00:00	EOSLE	Eosinophils	Hematology	4	%	0	4		4	%	0	4		Normal				Y		Week 24			3	Normal	1	03	Entered	40	Male	19NOV15	120	Placebo	<250 mg/day	No	No	<250 mg/day	No	Yes	Yes	Yes	No
Week 24	03_007	01JUN16	9:00:00	GGT	GGT	Liver Function Tests	49	IU/L	7	50		49	IU/L	7	50		Normal				Y		Week 24			54	High	-5	03	Entered	40	Male	19NOV15	120	Placebo	<250 mg/day	No	No	<250 mg/day	No	Yes	Yes	Yes	No
Week 24	03_007	01JUN16	9:00:00	GLUCF	Glucose Fasting	Chemistry	88	mg/dL	70	99		88	mg/dL	70	99		Normal				Y		Week 24						03	Entered	40	Male	19NOV15	120	Placebo	<250 mg/day	No	No	<250 mg/day	No	Yes	Yes	Yes	No
Week 24	03_007	01JUN16	9:00:00	HBA1C	HbA1c	HbA1c	6.2	%	4	5.6		6.2	%	4	5.6		High				Y	INTERPRETIVE INFORMATION: Hemoglobin A1cHemoglobin A1c values of 5.7-6.4 percent indicate an increasedrisk for developing diabetes mellitus. Hemoglobin A1c valuesgreater than or equal to 6.5 percent are diagnostic of diabetesmellitus. Diagnosis should be confirmed by repeating the Hb A1ctest.This boronate affinity Hb A1c method provides accurate analyticalresults in the presence of nearly all hem…	Week 24			5.7	High	0.5	03	Entered	40	Male	19NOV15	120	Placebo	<250 mg/day	No	No	<250 mg/day	No	Yes	Yes	Yes	No
Week 24	03_007	01JUN16	9:00:00	HCT	Hematocrit	Hematology	45.5	%	38	53		45.5	%	38	53		Normal				Y		Week 24			49	Normal	-3.5	03	Entered	40	Male	19NOV15	120	Placebo	<250 mg/day	No	No	<250 mg/day	No	Yes	Yes	Yes	No
Week 24	03_007	01JUN16	9:00:00	HGB	Hemoglobin	Hematology	14.8	g/dL	13.5	17.5		14.8	g/dL	13.5	17.5		Normal				Y		Week 24			15.3	Normal	-0.5	03	Entered	40	Male	19NOV15	120	Placebo	<250 mg/day	No	No	<250 mg/day	No	Yes	Yes	Yes	No
Week 24	03_007	01JUN16	9:00:00	INSULIN	Insulin	Insulin	20.9	uIU/mL	1.9	23		20.9	uIU/mL	1.9	23		Normal				Y		Week 24			27.2	High	-6.3	03	Entered	40	Male	19NOV15	120	Placebo	<250 mg/day	No	No	<250 mg/day	No	Yes	Yes	Yes	No
Week 24	03_007	01JUN16	9:00:00	K	Potassium	Chemistry	4.2	mmol/L	3.5	5.1		4.2	mmol/L	3.5	5.1		Normal				Y		Week 24			4.8	Normal	-0.6	03	Entered	40	Male	19NOV15	120	Placebo	<250 mg/day	No	No	<250 mg/day	No	Yes	Yes	Yes	No
Week 24	03_007	01JUN16	9:00:00	LYM	Abs Lymphocytes	Hematology	2.0	K/uL	0.8	4		2	K/uL	0.8	4		Normal				Y		Week 24			1.6	Normal	0.4	03	Entered	40	Male	19NOV15	120	Placebo	<250 mg/day	No	No	<250 mg/day	No	Yes	Yes	Yes	No
Week 24	03_007	01JUN16	9:00:00	LYMLE	Lymphocytes	Hematology	21	%	20	50		21	%	20	50		Normal				Y		Week 24			21	Normal	0	03	Entered	40	Male	19NOV15	120	Placebo	<250 mg/day	No	No	<250 mg/day	No	Yes	Yes	Yes	No
Week 24	03_007	01JUN16	9:00:00	MONO	Abs Monocytes	Hematology	0.9	K/uL	0	0.9		0.9	K/uL	0	0.9		Normal				Y		Week 24			0.5	Normal	0.4	03	Entered	40	Male	19NOV15	120	Placebo	<250 mg/day	No	No	<250 mg/day	No	Yes	Yes	Yes	No
Week 24	03_007	01JUN16	9:00:00	MONOLE	Monocytes	Hematology	9	%	1	9		9	%	1	9		Normal				Y		Week 24			7	Normal	2	03	Entered	40	Male	19NOV15	120	Placebo	<250 mg/day	No	No	<250 mg/day	No	Yes	Yes	Yes	No
Week 24	03_007	01JUN16	9:00:00	NEUT	Abs Neutrophil	Hematology	6.3	K/uL	1.5	7.7		6.3	K/uL	1.5	7.7		Normal				Y		Week 24			5.2	Normal	1.1	03	Entered	40	Male	19NOV15	120	Placebo	<250 mg/day	No	No	<250 mg/day	No	Yes	Yes	Yes	No
Week 24	03_007	01JUN16	9:00:00	NEUTLE	Neutrophils	Hematology	66	%	45	79		66	%	45	79		Normal				Y		Week 24			69	Normal	-3	03	Entered	40	Male	19NOV15	120	Placebo	<250 mg/day	No	No	<250 mg/day	No	Yes	Yes	Yes	No
Week 24	03_007	01JUN16	9:00:00	PLAT	Platelet Count	Hematology	203	K/uL	150	450		203	K/uL	150	450		Normal				Y		Week 24			232	Normal	-29	03	Entered	40	Male	19NOV15	120	Placebo	<250 mg/day	No	No	<250 mg/day	No	Yes	Yes	Yes	No
Week 24	03_007	01JUN16	9:00:00	RBC	RBC	Hematology	4.95	M/uL	4.3	5.8		4.95	M/uL	4.3	5.8		Normal				Y		Week 24			5.23	Normal	-0.28	03	Entered	40	Male	19NOV15	120	Placebo	<250 mg/day	No	No	<250 mg/day	No	Yes	Yes	Yes	No
Week 24	03_007	01JUN16	9:00:00	SODIUM	Sodium	Chemistry	137	mmol/L	136	145		137	mmol/L	136	145		Normal				Y		Week 24			141	Normal	-4	03	Entered	40	Male	19NOV15	120	Placebo	<250 mg/day	No	No	<250 mg/day	No	Yes	Yes	Yes	No
Week 24	03_007	01JUN16	9:00:00	TRIG	Triglycerides	Chemistry	226	mg/dL		150		226	mg/dL		150		High				Y		Week 24			254	High	-28	03	Entered	40	Male	19NOV15	120	Placebo	<250 mg/day	No	No	<250 mg/day	No	Yes	Yes	Yes	No
Week 24	03_007	01JUN16	9:00:00	TSH	TSH	TSH	0.89	uIU/mL	0.34	5.6		0.89	uIU/mL	0.34	5.6		Normal				Y		Week 24			1.03	Normal	-0.14	03	Entered	40	Male	19NOV15	120	Placebo	<250 mg/day	No	No	<250 mg/day	No	Yes	Yes	Yes	No
Week 24	03_007	01JUN16	9:00:00	WBC	WBC	Hematology	9.5	K/uL	4	11		9.5	K/uL	4	11		Normal				Y		Week 24			7.6	Normal	1.9	03	Entered	40	Male	19NOV15	120	Placebo	<250 mg/day	No	No	<250 mg/day	No	Yes	Yes	Yes	No
Unscheduled Visit	03_007	02MAR16	8:45:00	BASO	Abs Basophils	Hematology	0.1	K/uL	0	0.2		0.1	K/uL	0	0.2		Normal				N		Unscheduled Visit			0	Normal	0.1	03	Entered	40	Male	19NOV15	120	Placebo	<250 mg/day	No	No	<250 mg/day	No	Yes	Yes	Yes	No
Unscheduled Visit	03_007	02MAR16	8:45:00	BASOLE	Basophils	Hematology	1	%	0	2		1	%	0	2		Normal				N		Unscheduled Visit			0	Normal	1	03	Entered	40	Male	19NOV15	120	Placebo	<250 mg/day	No	No	<250 mg/day	No	Yes	Yes	Yes	No
Unscheduled Visit	03_007	02MAR16	8:45:00	EOS	Abs Eosinophils	Hematology	0.2	K/uL	0	0.6		0.2	K/uL	0	0.6		Normal				N		Unscheduled Visit			0.2	Normal	0	03	Entered	40	Male	19NOV15	120	Placebo	<250 mg/day	No	No	<250 mg/day	No	Yes	Yes	Yes	No
Unscheduled Visit	03_007	02MAR16	8:45:00	EOSLE	Eosinophils	Hematology	3	%	0	4		3	%	0	4		Normal				N		Unscheduled Visit			3	Normal	0	03	Entered	40	Male	19NOV15	120	Placebo	<250 mg/day	No	No	<250 mg/day	No	Yes	Yes	Yes	No
Unscheduled Visit	03_007	02MAR16	8:45:00	HCT	Hematocrit	Hematology	43.7	%	38	53		43.7	%	38	53		Normal				N		Unscheduled Visit			49	Normal	-5.3	03	Entered	40	Male	19NOV15	120	Placebo	<250 mg/day	No	No	<250 mg/day	No	Yes	Yes	Yes	No
Unscheduled Visit	03_007	02MAR16	8:45:00	HGB	Hemoglobin	Hematology	14.2	g/dL	13.5	17.5		14.2	g/dL	13.5	17.5		Normal				N		Unscheduled Visit			15.3	Normal	-1.1	03	Entered	40	Male	19NOV15	120	Placebo	<250 mg/day	No	No	<250 mg/day	No	Yes	Yes	Yes	No
Unscheduled Visit	03_007	02MAR16	8:45:00	LYM	Abs Lymphocytes	Hematology	1.4	K/uL	0.8	4		1.4	K/uL	0.8	4		Normal				N		Unscheduled Visit			1.6	Normal	-0.2	03	Entered	40	Male	19NOV15	120	Placebo	<250 mg/day	No	No	<250 mg/day	No	Yes	Yes	Yes	No
Unscheduled Visit	03_007	02MAR16	8:45:00	LYMLE	Lymphocytes	Hematology	23	%	20	50		23	%	20	50		Normal				N		Unscheduled Visit			21	Normal	2	03	Entered	40	Male	19NOV15	120	Placebo	<250 mg/day	No	No	<250 mg/day	No	Yes	Yes	Yes	No
Unscheduled Visit	03_007	02MAR16	8:45:00	MONO	Abs Monocytes	Hematology	0.6	K/uL	0	0.9		0.6	K/uL	0	0.9		Normal				N		Unscheduled Visit			0.5	Normal	0.1	03	Entered	40	Male	19NOV15	120	Placebo	<250 mg/day	No	No	<250 mg/day	No	Yes	Yes	Yes	No
Unscheduled Visit	03_007	02MAR16	8:45:00	MONOLE	Monocytes	Hematology	9	%	1	9		9	%	1	9		Normal				N		Unscheduled Visit			7	Normal	2	03	Entered	40	Male	19NOV15	120	Placebo	<250 mg/day	No	No	<250 mg/day	No	Yes	Yes	Yes	No
Unscheduled Visit	03_007	02MAR16	8:45:00	NEUT	Abs Neutrophil	Hematology	3.9	K/uL	1.5	7.7		3.9	K/uL	1.5	7.7		Normal				N		Unscheduled Visit			5.2	Normal	-1.3	03	Entered	40	Male	19NOV15	120	Placebo	<250 mg/day	No	No	<250 mg/day	No	Yes	Yes	Yes	No
Unscheduled Visit	03_007	02MAR16	8:45:00	NEUTLE	Neutrophils	Hematology	63	%	45	79		63	%	45	79		Normal				N		Unscheduled Visit			69	Normal	-6	03	Entered	40	Male	19NOV15	120	Placebo	<250 mg/day	No	No	<250 mg/day	No	Yes	Yes	Yes	No
Unscheduled Visit	03_007	02MAR16	8:45:00	PLAT	Platelet Count	Hematology	181	K/uL	150	450		181	K/uL	150	450		Normal				N		Unscheduled Visit			232	Normal	-51	03	Entered	40	Male	19NOV15	120	Placebo	<250 mg/day	No	No	<250 mg/day	No	Yes	Yes	Yes	No
Unscheduled Visit	03_007	02MAR16	8:45:00	RBC	RBC	Hematology	4.63	M/uL	4.3	5.8		4.63	M/uL	4.3	5.8		Normal				N		Unscheduled Visit			5.23	Normal	-0.6	03	Entered	40	Male	19NOV15	120	Placebo	<250 mg/day	No	No	<250 mg/day	No	Yes	Yes	Yes	No
Unscheduled Visit	03_007	02MAR16	8:45:00	WBC	WBC	Hematology	6.2	K/uL	4	11		6.2	K/uL	4	11		Normal				N		Unscheduled Visit			7.6	Normal	-1.4	03	Entered	40	Male	19NOV15	120	Placebo	<250 mg/day	No	No	<250 mg/day	No	Yes	Yes	Yes	No
Screening	03_008	16NOV15	16:45:00	ALP	Alkaline Phosphatase	Liver Function Tests	95	IU/L	32	92		95	IU/L	32	92		High				N		Screening			95	High		03	Screen Failure	46	Male							>=250 mg/day	Yes	No	No	No	No
Screening	03_008	16NOV15	16:45:00	ALT	ALT	Liver Function Tests	81	IU/L	17	63		81	IU/L	17	63		High				N		Screening			81	High		03	Screen Failure	46	Male							>=250 mg/day	Yes	No	No	No	No
Screening	03_008	16NOV15	16:45:00	AST	AST	Liver Function Tests	80	IU/L	15	41		80	IU/L	15	41		High				N		Screening			80	High		03	Screen Failure	46	Male							>=250 mg/day	Yes	No	No	No	No
Screening	03_008	16NOV15	16:45:00	BILIT	Bilirubin Total	Liver Function Tests	0.7	mg/dL	0.3	1.2		0.7	mg/dL	0.3	1.2		Normal				N		Screening			0.7	Normal		03	Screen Failure	46	Male							>=250 mg/day	Yes	No	No	No	No
Screening	03_008	16NOV15	16:45:00	GGT	GGT	Liver Function Tests	409	IU/L	7	50		409	IU/L	7	50		High				N		Screening			409	High		03	Screen Failure	46	Male							>=250 mg/day	Yes	No	No	No	No
Screening	03_008	16NOV15	16:45:00	HBA1C	HbA1c	HbA1c	6.2	%	4	5.6		6.2	%	4	5.6		High				N	INTERPRETIVE INFORMATION: Hemoglobin A1cHemoglobin A1c values of 5.7-6.4 percent indicate an increasedrisk for developing diabetes mellitus. Hemoglobin A1c valuesgreater than or equal to 6.5 percent are diagnostic of diabetesmellitus. Diagnosis should be confirmed by repeating the Hb A1ctest.This boronate affinity Hb A1c method provides accurate analyticalresults in the presence of nearly all hem…	Screening			6.2	High		03	Screen Failure	46	Male							>=250 mg/day	Yes	No	No	No	No
Screening	03_008	16NOV15	16:45:00	HCAB	Hepatitis C Antibody	Hepatitis C Antibody	NONREACT				NONREACT					NONREACT					N		Screening						03	Screen Failure	46	Male							>=250 mg/day	Yes	No	No	No	No
Screening	03_008	16NOV15	16:45:00	TSH	TSH	TSH	2.30	uIU/mL	0.34	5.6		2.3	uIU/mL	0.34	5.6		Normal				N		Screening			2.3	Normal		03	Screen Failure	46	Male							>=250 mg/day	Yes	No	No	No	No
Screening	03_009	03DEC15	10:30:00	ALP	Alkaline Phosphatase	Liver Function Tests	60	IU/L	32	92		60	IU/L	32	92		Normal				N		Screening			57	Normal		03	Entered	40	Male	13JAN16	122	MF4637	<250 mg/day	No	No	>=250 mg/day	No	Yes	Yes	Yes	Yes
Screening	03_009	03DEC15	10:30:00	ALT	ALT	Liver Function Tests	45	IU/L	17	63		45	IU/L	17	63		Normal				N		Screening			49	Normal		03	Entered	40	Male	13JAN16	122	MF4637	<250 mg/day	No	No	>=250 mg/day	No	Yes	Yes	Yes	Yes
Screening	03_009	03DEC15	10:30:00	AST	AST	Liver Function Tests	31	IU/L	15	41		31	IU/L	15	41		Normal				N		Screening			30	Normal		03	Entered	40	Male	13JAN16	122	MF4637	<250 mg/day	No	No	>=250 mg/day	No	Yes	Yes	Yes	Yes
Screening	03_009	03DEC15	10:30:00	BILIT	Bilirubin Total	Liver Function Tests	1.0	mg/dL	0.3	1.2		1	mg/dL	0.3	1.2		Normal				N		Screening			1.2	Normal		03	Entered	40	Male	13JAN16	122	MF4637	<250 mg/day	No	No	>=250 mg/day	No	Yes	Yes	Yes	Yes
Screening	03_009	03DEC15	10:30:00	GGT	GGT	Liver Function Tests	54	IU/L	7	50		54	IU/L	7	50		High				N		Screening			49	Normal		03	Entered	40	Male	13JAN16	122	MF4637	<250 mg/day	No	No	>=250 mg/day	No	Yes	Yes	Yes	Yes
Screening	03_009	03DEC15	10:30:00	HBA1C	HbA1c	HbA1c	4.8	%	4	5.6		4.8	%	4	5.6		Normal				N	INTERPRETIVE INFORMATION: Hemoglobin A1cHemoglobin A1c values of 5.7-6.4 percent indicate an increasedrisk for developing diabetes mellitus. Hemoglobin A1c valuesgreater than or equal to 6.5 percent are diagnostic of diabetesmellitus. Diagnosis should be confirmed by repeating the Hb A1ctest.This boronate affinity Hb A1c method provides accurate analyticalresults in the presence of nearly all hem…	Screening			4.8	Normal		03	Entered	40	Male	13JAN16	122	MF4637	<250 mg/day	No	No	>=250 mg/day	No	Yes	Yes	Yes	Yes
Screening	03_009	03DEC15	10:30:00	HCAB	Hepatitis C Antibody	Hepatitis C Antibody	NONREACT				NONREACT					NONREACT					N		Screening						03	Entered	40	Male	13JAN16	122	MF4637	<250 mg/day	No	No	>=250 mg/day	No	Yes	Yes	Yes	Yes
Screening	03_009	03DEC15	10:30:00	TSH	TSH	TSH	1.35	uIU/mL	0.34	5.6		1.35	uIU/mL	0.34	5.6		Normal				N		Screening			1.35	Normal		03	Entered	40	Male	13JAN16	122	MF4637	<250 mg/day	No	No	>=250 mg/day	No	Yes	Yes	Yes	Yes
Baseline	03_009	12JAN16	12:30:00	ALB	Albumin	Chemistry	4.7	g/dL	3.5	5.2		4.7	g/dL	3.5	5.2		Normal				Y		Baseline			4.7	Normal		03	Entered	40	Male	13JAN16	122	MF4637	<250 mg/day	No	No	>=250 mg/day	No	Yes	Yes	Yes	Yes
Baseline	03_009	12JAN16	12:30:00	ALP	Alkaline Phosphatase	Liver Function Tests	57	IU/L	32	92		57	IU/L	32	92		Normal				Y		Baseline			57	Normal		03	Entered	40	Male	13JAN16	122	MF4637	<250 mg/day	No	No	>=250 mg/day	No	Yes	Yes	Yes	Yes
Baseline	03_009	12JAN16	12:30:00	ALT	ALT	Liver Function Tests	49	IU/L	17	63		49	IU/L	17	63		Normal				Y		Baseline			49	Normal		03	Entered	40	Male	13JAN16	122	MF4637	<250 mg/day	No	No	>=250 mg/day	No	Yes	Yes	Yes	Yes
Baseline	03_009	12JAN16	12:30:00	AST	AST	Liver Function Tests	30	IU/L	15	41		30	IU/L	15	41		Normal				Y		Baseline			30	Normal		03	Entered	40	Male	13JAN16	122	MF4637	<250 mg/day	No	No	>=250 mg/day	No	Yes	Yes	Yes	Yes
Baseline	03_009	12JAN16	12:30:00	BASO	Abs Basophils	Hematology	0.1	K/uL	0	0.2		0.1	K/uL	0	0.2		Normal				Y		Baseline			0.1	Normal		03	Entered	40	Male	13JAN16	122	MF4637	<250 mg/day	No	No	>=250 mg/day	No	Yes	Yes	Yes	Yes
Baseline	03_009	12JAN16	12:30:00	BASOLE	Basophils	Hematology	1	%	0	2		1	%	0	2		Normal				Y		Baseline			1	Normal		03	Entered	40	Male	13JAN16	122	MF4637	<250 mg/day	No	No	>=250 mg/day	No	Yes	Yes	Yes	Yes
Baseline	03_009	12JAN16	12:30:00	BICARB	BiCarbonate (CO2)	Chemistry	24	mmol/L	22	32		24	mmol/L	22	32		Normal				Y		Baseline			24	Normal		03	Entered	40	Male	13JAN16	122	MF4637	<250 mg/day	No	No	>=250 mg/day	No	Yes	Yes	Yes	Yes
Baseline	03_009	12JAN16	12:30:00	BILIT	Bilirubin Total	Liver Function Tests	1.2	mg/dL	0.3	1.2		1.2	mg/dL	0.3	1.2		Normal				Y		Baseline			1.2	Normal		03	Entered	40	Male	13JAN16	122	MF4637	<250 mg/day	No	No	>=250 mg/day	No	Yes	Yes	Yes	Yes
Baseline	03_009	12JAN16	12:30:00	BUN	BUN (urea)	Chemistry	22	mg/dL	6	20		22	mg/dL	6	20		High				Y		Baseline			22	High		03	Entered	40	Male	13JAN16	122	MF4637	<250 mg/day	No	No	>=250 mg/day	No	Yes	Yes	Yes	Yes
Baseline	03_009	12JAN16	12:30:00	CA	Calcium	Chemistry	10.5	mg/dL	8.6	10		10.5	mg/dL	8.6	10		High				Y		Baseline			10.5	High		03	Entered	40	Male	13JAN16	122	MF4637	<250 mg/day	No	No	>=250 mg/day	No	Yes	Yes	Yes	Yes
Baseline	03_009	12JAN16	12:30:00	CL	Chloride	Chemistry	104	mmol/L	98	107		104	mmol/L	98	107		Normal				Y		Baseline			104	Normal		03	Entered	40	Male	13JAN16	122	MF4637	<250 mg/day	No	No	>=250 mg/day	No	Yes	Yes	Yes	Yes
Baseline	03_009	12JAN16	12:30:00	CREAT	Creatinine	Chemistry	1.2	mg/dL	0.9	1.3		1.2	mg/dL	0.9	1.3		Normal				Y		Baseline			1.2	Normal		03	Entered	40	Male	13JAN16	122	MF4637	<250 mg/day	No	No	>=250 mg/day	No	Yes	Yes	Yes	Yes
Baseline	03_009	12JAN16	12:30:00	CRPHS	hs-CRP	hs-CRP	2.07	mg/L				2.07	mg/L				Normal				Y	hs-CRP CHD risk level: low risk <1.0 mg/L intermediate risk 1.0-3.0 mg/L high risk >3.0 mg/L Values >10 mg/L suggests an inflammatory disorder requiring separate evaluation. Cardiac risk assessment is not appropriate in this context.	Baseline			2.07	Normal		03	Entered	40	Male	13JAN16	122	MF4637	<250 mg/day	No	No	>=250 mg/day	No	Yes	Yes	Yes	Yes
Baseline	03_009	12JAN16	12:30:00	EOS	Abs Eosinophils	Hematology	0.1	K/uL	0	0.6		0.1	K/uL	0	0.6		Normal				Y		Baseline			0.1	Normal		03	Entered	40	Male	13JAN16	122	MF4637	<250 mg/day	No	No	>=250 mg/day	No	Yes	Yes	Yes	Yes
Baseline	03_009	12JAN16	12:30:00	EOSLE	Eosinophils	Hematology	2	%	0	4		2	%	0	4		Normal				Y		Baseline			2	Normal		03	Entered	40	Male	13JAN16	122	MF4637	<250 mg/day	No	No	>=250 mg/day	No	Yes	Yes	Yes	Yes
Baseline	03_009	12JAN16	12:30:00	GGT	GGT	Liver Function Tests	49	IU/L	7	50		49	IU/L	7	50		Normal				Y		Baseline			49	Normal		03	Entered	40	Male	13JAN16	122	MF4637	<250 mg/day	No	No	>=250 mg/day	No	Yes	Yes	Yes	Yes
Baseline	03_009	12JAN16	12:30:00	GLUCF	Glucose Fasting	Chemistry	101	mg/dL	70	99		101	mg/dL	70	99		High				Y		Baseline			101	High		03	Entered	40	Male	13JAN16	122	MF4637	<250 mg/day	No	No	>=250 mg/day	No	Yes	Yes	Yes	Yes
Baseline	03_009	12JAN16	12:30:00	HCT	Hematocrit	Hematology	50.2	%	38	53		50.2	%	38	53		Normal				Y		Baseline			50.2	Normal		03	Entered	40	Male	13JAN16	122	MF4637	<250 mg/day	No	No	>=250 mg/day	No	Yes	Yes	Yes	Yes
Baseline	03_009	12JAN16	12:30:00	HGB	Hemoglobin	Hematology	16.2	g/dL	13.5	17.5		16.2	g/dL	13.5	17.5		Normal				Y		Baseline			16.2	Normal		03	Entered	40	Male	13JAN16	122	MF4637	<250 mg/day	No	No	>=250 mg/day	No	Yes	Yes	Yes	Yes
Baseline	03_009	12JAN16	12:30:00	INSULIN	Insulin	Insulin	33.9	uIU/mL	1.9	23		33.9	uIU/mL	1.9	23		High				Y		Baseline			33.9	High		03	Entered	40	Male	13JAN16	122	MF4637	<250 mg/day	No	No	>=250 mg/day	No	Yes	Yes	Yes	Yes
Baseline	03_009	12JAN16	12:30:00	K	Potassium	Chemistry	5.0	mmol/L	3.5	5.1		5	mmol/L	3.5	5.1		Normal				Y		Baseline			5	Normal		03	Entered	40	Male	13JAN16	122	MF4637	<250 mg/day	No	No	>=250 mg/day	No	Yes	Yes	Yes	Yes
Baseline	03_009	12JAN16	12:30:00	LYM	Abs Lymphocytes	Hematology	2.4	K/uL	0.8	4		2.4	K/uL	0.8	4		Normal				Y		Baseline			2.4	Normal		03	Entered	40	Male	13JAN16	122	MF4637	<250 mg/day	No	No	>=250 mg/day	No	Yes	Yes	Yes	Yes
Baseline	03_009	12JAN16	12:30:00	LYMLE	Lymphocytes	Hematology	37	%	20	50		37	%	20	50		Normal				Y		Baseline			37	Normal		03	Entered	40	Male	13JAN16	122	MF4637	<250 mg/day	No	No	>=250 mg/day	No	Yes	Yes	Yes	Yes
Baseline	03_009	12JAN16	12:30:00	MONO	Abs Monocytes	Hematology	0.5	K/uL	0	0.9		0.5	K/uL	0	0.9		Normal				Y		Baseline			0.5	Normal		03	Entered	40	Male	13JAN16	122	MF4637	<250 mg/day	No	No	>=250 mg/day	No	Yes	Yes	Yes	Yes
Baseline	03_009	12JAN16	12:30:00	MONOLE	Monocytes	Hematology	7	%	1	9		7	%	1	9		Normal				Y		Baseline			7	Normal		03	Entered	40	Male	13JAN16	122	MF4637	<250 mg/day	No	No	>=250 mg/day	No	Yes	Yes	Yes	Yes
Baseline	03_009	12JAN16	12:30:00	NEUT	Abs Neutrophil	Hematology	3.5	K/uL	1.5	7.7		3.5	K/uL	1.5	7.7		Normal				Y		Baseline			3.5	Normal		03	Entered	40	Male	13JAN16	122	MF4637	<250 mg/day	No	No	>=250 mg/day	No	Yes	Yes	Yes	Yes
Baseline	03_009	12JAN16	12:30:00	NEUTLE	Neutrophils	Hematology	53	%	45	79		53	%	45	79		Normal				Y		Baseline			53	Normal		03	Entered	40	Male	13JAN16	122	MF4637	<250 mg/day	No	No	>=250 mg/day	No	Yes	Yes	Yes	Yes
Baseline	03_009	12JAN16	12:30:00	PLAT	Platelet Count	Hematology	291	K/uL	150	450		291	K/uL	150	450		Normal				Y		Baseline			291	Normal		03	Entered	40	Male	13JAN16	122	MF4637	<250 mg/day	No	No	>=250 mg/day	No	Yes	Yes	Yes	Yes
Baseline	03_009	12JAN16	12:30:00	RBC	RBC	Hematology	5.61	M/uL	4.3	5.8		5.61	M/uL	4.3	5.8		Normal				Y		Baseline			5.61	Normal		03	Entered	40	Male	13JAN16	122	MF4637	<250 mg/day	No	No	>=250 mg/day	No	Yes	Yes	Yes	Yes
Baseline	03_009	12JAN16	12:30:00	SODIUM	Sodium	Chemistry	143	mmol/L	136	145		143	mmol/L	136	145		Normal				Y		Baseline			143	Normal		03	Entered	40	Male	13JAN16	122	MF4637	<250 mg/day	No	No	>=250 mg/day	No	Yes	Yes	Yes	Yes
Baseline	03_009	12JAN16	12:30:00	TRIG	Triglycerides	Chemistry	143	mg/dL		150		143	mg/dL		150		Normal				Y		Baseline			143	Normal		03	Entered	40	Male	13JAN16	122	MF4637	<250 mg/day	No	No	>=250 mg/day	No	Yes	Yes	Yes	Yes
Baseline	03_009	12JAN16	12:30:00	WBC	WBC	Hematology	6.6	K/uL	4	11		6.6	K/uL	4	11		Normal				Y		Baseline			6.6	Normal		03	Entered	40	Male	13JAN16	122	MF4637	<250 mg/day	No	No	>=250 mg/day	No	Yes	Yes	Yes	Yes
Week 12	03_009	29MAR16	9:15:00	ALP	Alkaline Phosphatase	Liver Function Tests	56	IU/L	32	92		56	IU/L	32	92		Normal				N		Week 12			57	Normal	-1	03	Entered	40	Male	13JAN16	122	MF4637	<250 mg/day	No	No	>=250 mg/day	No	Yes	Yes	Yes	Yes
Week 12	03_009	29MAR16	9:15:00	ALT	ALT	Liver Function Tests	46	IU/L	17	63		46	IU/L	17	63		Normal				N		Week 12			49	Normal	-3	03	Entered	40	Male	13JAN16	122	MF4637	<250 mg/day	No	No	>=250 mg/day	No	Yes	Yes	Yes	Yes
Week 12	03_009	29MAR16	9:15:00	AST	AST	Liver Function Tests	29	IU/L	15	41		29	IU/L	15	41		Normal				N		Week 12			30	Normal	-1	03	Entered	40	Male	13JAN16	122	MF4637	<250 mg/day	No	No	>=250 mg/day	No	Yes	Yes	Yes	Yes
Week 12	03_009	29MAR16	9:15:00	BASO	Abs Basophils	Hematology	0.1	K/uL	0	0.2		0.1	K/uL	0	0.2		Normal				N		Week 12			0.1	Normal	0	03	Entered	40	Male	13JAN16	122	MF4637	<250 mg/day	No	No	>=250 mg/day	No	Yes	Yes	Yes	Yes
Week 12	03_009	29MAR16	9:15:00	BASOLE	Basophils	Hematology	1	%	0	2		1	%	0	2		Normal				N		Week 12			1	Normal	0	03	Entered	40	Male	13JAN16	122	MF4637	<250 mg/day	No	No	>=250 mg/day	No	Yes	Yes	Yes	Yes
Week 12	03_009	29MAR16	9:15:00	BILIT	Bilirubin Total	Liver Function Tests	2.0	mg/dL	0.3	1.2		2	mg/dL	0.3	1.2		High				N		Week 12			1.2	Normal	0.8	03	Entered	40	Male	13JAN16	122	MF4637	<250 mg/day	No	No	>=250 mg/day	No	Yes	Yes	Yes	Yes
Week 12	03_009	29MAR16	9:15:00	EOS	Abs Eosinophils	Hematology	0.1	K/uL	0	0.6		0.1	K/uL	0	0.6		Normal				N		Week 12			0.1	Normal	0	03	Entered	40	Male	13JAN16	122	MF4637	<250 mg/day	No	No	>=250 mg/day	No	Yes	Yes	Yes	Yes
Week 12	03_009	29MAR16	9:15:00	EOSLE	Eosinophils	Hematology	1	%	0	4		1	%	0	4		Normal				N		Week 12			2	Normal	-1	03	Entered	40	Male	13JAN16	122	MF4637	<250 mg/day	No	No	>=250 mg/day	No	Yes	Yes	Yes	Yes
Week 12	03_009	29MAR16	9:15:00	GGT	GGT	Liver Function Tests	35	IU/L	7	50		35	IU/L	7	50		Normal				N		Week 12			49	Normal	-14	03	Entered	40	Male	13JAN16	122	MF4637	<250 mg/day	No	No	>=250 mg/day	No	Yes	Yes	Yes	Yes
Week 12	03_009	29MAR16	9:15:00	HCT	Hematocrit	Hematology	49.9	%	38	53		49.9	%	38	53		Normal				N		Week 12			50.2	Normal	-0.3	03	Entered	40	Male	13JAN16	122	MF4637	<250 mg/day	No	No	>=250 mg/day	No	Yes	Yes	Yes	Yes
Week 12	03_009	29MAR16	9:15:00	HGB	Hemoglobin	Hematology	16.4	g/dL	13.5	17.5		16.4	g/dL	13.5	17.5		Normal				N		Week 12			16.2	Normal	0.2	03	Entered	40	Male	13JAN16	122	MF4637	<250 mg/day	No	No	>=250 mg/day	No	Yes	Yes	Yes	Yes
Week 12	03_009	29MAR16	9:15:00	LYM	Abs Lymphocytes	Hematology	1.3	K/uL	0.8	4		1.3	K/uL	0.8	4		Normal				N		Week 12			2.4	Normal	-1.1	03	Entered	40	Male	13JAN16	122	MF4637	<250 mg/day	No	No	>=250 mg/day	No	Yes	Yes	Yes	Yes
Week 12	03_009	29MAR16	9:15:00	LYMLE	Lymphocytes	Hematology	25	%	20	50		25	%	20	50		Normal				N		Week 12			37	Normal	-12	03	Entered	40	Male	13JAN16	122	MF4637	<250 mg/day	No	No	>=250 mg/day	No	Yes	Yes	Yes	Yes
Week 12	03_009	29MAR16	9:15:00	MONO	Abs Monocytes	Hematology	0.2	K/uL	0	0.9		0.2	K/uL	0	0.9		Normal				N		Week 12			0.5	Normal	-0.3	03	Entered	40	Male	13JAN16	122	MF4637	<250 mg/day	No	No	>=250 mg/day	No	Yes	Yes	Yes	Yes
Week 12	03_009	29MAR16	9:15:00	MONOLE	Monocytes	Hematology	4	%	1	9		4	%	1	9		Normal				N		Week 12			7	Normal	-3	03	Entered	40	Male	13JAN16	122	MF4637	<250 mg/day	No	No	>=250 mg/day	No	Yes	Yes	Yes	Yes
Week 12	03_009	29MAR16	9:15:00	NEUT	Abs Neutrophil	Hematology	3.4	K/uL	1.5	7.7		3.4	K/uL	1.5	7.7		Normal				N		Week 12			3.5	Normal	-0.1	03	Entered	40	Male	13JAN16	122	MF4637	<250 mg/day	No	No	>=250 mg/day	No	Yes	Yes	Yes	Yes
Week 12	03_009	29MAR16	9:15:00	NEUTLE	Neutrophils	Hematology	68	%	45	79		68	%	45	79		Normal				N		Week 12			53	Normal	15	03	Entered	40	Male	13JAN16	122	MF4637	<250 mg/day	No	No	>=250 mg/day	No	Yes	Yes	Yes	Yes
Week 12	03_009	29MAR16	9:15:00	PLAT	Platelet Count	Hematology	216	K/uL	150	450		216	K/uL	150	450		Normal				N		Week 12			291	Normal	-75	03	Entered	40	Male	13JAN16	122	MF4637	<250 mg/day	No	No	>=250 mg/day	No	Yes	Yes	Yes	Yes
Week 12	03_009	29MAR16	9:15:00	RBC	RBC	Hematology	5.46	M/uL	4.3	5.8		5.46	M/uL	4.3	5.8		Normal				N		Week 12			5.61	Normal	-0.15	03	Entered	40	Male	13JAN16	122	MF4637	<250 mg/day	No	No	>=250 mg/day	No	Yes	Yes	Yes	Yes
Week 12	03_009	29MAR16	9:15:00	WBC	WBC	Hematology	5.0	K/uL	4	11		5	K/uL	4	11		Normal				N		Week 12			6.6	Normal	-1.6	03	Entered	40	Male	13JAN16	122	MF4637	<250 mg/day	No	No	>=250 mg/day	No	Yes	Yes	Yes	Yes
Week 24	03_009	29JUN16	9:25:00	ALB	Albumin	Chemistry	4.7	g/dL	3.5	5.2		4.7	g/dL	3.5	5.2		Normal				Y		Week 24			4.7	Normal	0	03	Entered	40	Male	13JAN16	122	MF4637	<250 mg/day	No	No	>=250 mg/day	No	Yes	Yes	Yes	Yes
Week 24	03_009	29JUN16	9:25:00	ALP	Alkaline Phosphatase	Liver Function Tests	54	IU/L	32	92		54	IU/L	32	92		Normal				Y		Week 24			57	Normal	-3	03	Entered	40	Male	13JAN16	122	MF4637	<250 mg/day	No	No	>=250 mg/day	No	Yes	Yes	Yes	Yes
Week 24	03_009	29JUN16	9:25:00	ALT	ALT	Liver Function Tests	45	IU/L	17	63		45	IU/L	17	63		Normal				Y		Week 24			49	Normal	-4	03	Entered	40	Male	13JAN16	122	MF4637	<250 mg/day	No	No	>=250 mg/day	No	Yes	Yes	Yes	Yes
Week 24	03_009	29JUN16	9:25:00	AST	AST	Liver Function Tests	29	IU/L	15	41		29	IU/L	15	41		Normal				Y		Week 24			30	Normal	-1	03	Entered	40	Male	13JAN16	122	MF4637	<250 mg/day	No	No	>=250 mg/day	No	Yes	Yes	Yes	Yes
Week 24	03_009	29JUN16	9:25:00	BASO	Abs Basophils	Hematology	0.1	K/uL	0	0.2		0.1	K/uL	0	0.2		Normal				Y		Week 24			0.1	Normal	0	03	Entered	40	Male	13JAN16	122	MF4637	<250 mg/day	No	No	>=250 mg/day	No	Yes	Yes	Yes	Yes
Week 24	03_009	29JUN16	9:25:00	BASOLE	Basophils	Hematology	1	%	0	2		1	%	0	2		Normal				Y		Week 24			1	Normal	0	03	Entered	40	Male	13JAN16	122	MF4637	<250 mg/day	No	No	>=250 mg/day	No	Yes	Yes	Yes	Yes
Week 24	03_009	29JUN16	9:25:00	BICARB	BiCarbonate (CO2)	Chemistry	21	mmol/L	22	32		21	mmol/L	22	32		Low				Y		Week 24			24	Normal	-3	03	Entered	40	Male	13JAN16	122	MF4637	<250 mg/day	No	No	>=250 mg/day	No	Yes	Yes	Yes	Yes
Week 24	03_009	29JUN16	9:25:00	BILIT	Bilirubin Total	Liver Function Tests	1.2	mg/dL	0.3	1.2		1.2	mg/dL	0.3	1.2		Normal				Y		Week 24			1.2	Normal	0	03	Entered	40	Male	13JAN16	122	MF4637	<250 mg/day	No	No	>=250 mg/day	No	Yes	Yes	Yes	Yes
Week 24	03_009	29JUN16	9:25:00	BUN	BUN (urea)	Chemistry	17	mg/dL	6	20		17	mg/dL	6	20		Normal				Y		Week 24			22	High	-5	03	Entered	40	Male	13JAN16	122	MF4637	<250 mg/day	No	No	>=250 mg/day	No	Yes	Yes	Yes	Yes
Week 24	03_009	29JUN16	9:25:00	CA	Calcium	Chemistry	9.6	mg/dL	8.6	10		9.6	mg/dL	8.6	10		Normal				Y		Week 24			10.5	High	-0.9	03	Entered	40	Male	13JAN16	122	MF4637	<250 mg/day	No	No	>=250 mg/day	No	Yes	Yes	Yes	Yes
Week 24	03_009	29JUN16	9:25:00	CL	Chloride	Chemistry	102	mmol/L	98	107		102	mmol/L	98	107		Normal				Y		Week 24			104	Normal	-2	03	Entered	40	Male	13JAN16	122	MF4637	<250 mg/day	No	No	>=250 mg/day	No	Yes	Yes	Yes	Yes
Week 24	03_009	29JUN16	9:25:00	CREAT	Creatinine	Chemistry	1.1	mg/dL	0.9	1.3		1.1	mg/dL	0.9	1.3		Normal				Y		Week 24			1.2	Normal	-0.1	03	Entered	40	Male	13JAN16	122	MF4637	<250 mg/day	No	No	>=250 mg/day	No	Yes	Yes	Yes	Yes
Week 24	03_009	29JUN16	9:25:00	CRPHS	hs-CRP	hs-CRP	2.40	mg/L				2.4	mg/L				Normal				Y	hs-CRP CHD risk level: low risk <1.0 mg/L intermediate risk 1.0-3.0 mg/L high risk >3.0 mg/L Values >10 mg/L suggests an inflammatory disorder requiring separate evaluation. Cardiac risk assessment is not appropriate in this context.	Week 24			2.07	Normal	0.33	03	Entered	40	Male	13JAN16	122	MF4637	<250 mg/day	No	No	>=250 mg/day	No	Yes	Yes	Yes	Yes
Week 24	03_009	29JUN16	9:25:00	EOS	Abs Eosinophils	Hematology	0.1	K/uL	0	0.6		0.1	K/uL	0	0.6		Normal				Y		Week 24			0.1	Normal	0	03	Entered	40	Male	13JAN16	122	MF4637	<250 mg/day	No	No	>=250 mg/day	No	Yes	Yes	Yes	Yes
Week 24	03_009	29JUN16	9:25:00	EOSLE	Eosinophils	Hematology	1	%	0	4		1	%	0	4		Normal				Y		Week 24			2	Normal	-1	03	Entered	40	Male	13JAN16	122	MF4637	<250 mg/day	No	No	>=250 mg/day	No	Yes	Yes	Yes	Yes
Week 24	03_009	29JUN16	9:25:00	GGT	GGT	Liver Function Tests	36	IU/L	7	50		36	IU/L	7	50		Normal				Y		Week 24			49	Normal	-13	03	Entered	40	Male	13JAN16	122	MF4637	<250 mg/day	No	No	>=250 mg/day	No	Yes	Yes	Yes	Yes
Week 24	03_009	29JUN16	9:25:00	GLUCF	Glucose Fasting	Chemistry	106	mg/dL	70	99		106	mg/dL	70	99		High				Y		Week 24			101	High	5	03	Entered	40	Male	13JAN16	122	MF4637	<250 mg/day	No	No	>=250 mg/day	No	Yes	Yes	Yes	Yes
Week 24	03_009	29JUN16	9:25:00	HBA1C	HbA1c	HbA1c	5.1	%	4	5.6		5.1	%	4	5.6		Normal				Y	INTERPRETIVE INFORMATION: Hemoglobin A1cHemoglobin A1c values of 5.7-6.4 percent indicate an increasedrisk for developing diabetes mellitus. Hemoglobin A1c valuesgreater than or equal to 6.5 percent are diagnostic of diabetesmellitus. Diagnosis should be confirmed by repeating the Hb A1ctest.This boronate affinity Hb A1c method provides accurate analyticalresults in the presence of nearly all hem…	Week 24			4.8	Normal	0.3	03	Entered	40	Male	13JAN16	122	MF4637	<250 mg/day	No	No	>=250 mg/day	No	Yes	Yes	Yes	Yes
Week 24	03_009	29JUN16	9:25:00	HCT	Hematocrit	Hematology	48.8	%	38	53		48.8	%	38	53		Normal				Y		Week 24			50.2	Normal	-1.4	03	Entered	40	Male	13JAN16	122	MF4637	<250 mg/day	No	No	>=250 mg/day	No	Yes	Yes	Yes	Yes
Week 24	03_009	29JUN16	9:25:00	HGB	Hemoglobin	Hematology	16.1	g/dL	13.5	17.5		16.1	g/dL	13.5	17.5		Normal				Y		Week 24			16.2	Normal	-0.1	03	Entered	40	Male	13JAN16	122	MF4637	<250 mg/day	No	No	>=250 mg/day	No	Yes	Yes	Yes	Yes
Week 24	03_009	29JUN16	9:25:00	INSULIN	Insulin	Insulin	47.7	uIU/mL	1.9	23		47.7	uIU/mL	1.9	23		High				Y		Week 24			33.9	High	13.8	03	Entered	40	Male	13JAN16	122	MF4637	<250 mg/day	No	No	>=250 mg/day	No	Yes	Yes	Yes	Yes
Week 24	03_009	29JUN16	9:25:00	K	Potassium	Chemistry	4.0	mmol/L	3.5	5.1		4	mmol/L	3.5	5.1		Normal				Y		Week 24			5	Normal	-1	03	Entered	40	Male	13JAN16	122	MF4637	<250 mg/day	No	No	>=250 mg/day	No	Yes	Yes	Yes	Yes
Week 24	03_009	29JUN16	9:25:00	LYM	Abs Lymphocytes	Hematology	1.5	K/uL	0.8	4		1.5	K/uL	0.8	4		Normal				Y		Week 24			2.4	Normal	-0.9	03	Entered	40	Male	13JAN16	122	MF4637	<250 mg/day	No	No	>=250 mg/day	No	Yes	Yes	Yes	Yes
Week 24	03_009	29JUN16	9:25:00	LYMLE	Lymphocytes	Hematology	21	%	20	50		21	%	20	50		Normal				Y		Week 24			37	Normal	-16	03	Entered	40	Male	13JAN16	122	MF4637	<250 mg/day	No	No	>=250 mg/day	No	Yes	Yes	Yes	Yes
Week 24	03_009	29JUN16	9:25:00	MONO	Abs Monocytes	Hematology	0.4	K/uL	0	0.9		0.4	K/uL	0	0.9		Normal				Y		Week 24			0.5	Normal	-0.1	03	Entered	40	Male	13JAN16	122	MF4637	<250 mg/day	No	No	>=250 mg/day	No	Yes	Yes	Yes	Yes
Week 24	03_009	29JUN16	9:25:00	MONOLE	Monocytes	Hematology	5	%	1	9		5	%	1	9		Normal				Y		Week 24			7	Normal	-2	03	Entered	40	Male	13JAN16	122	MF4637	<250 mg/day	No	No	>=250 mg/day	No	Yes	Yes	Yes	Yes
Week 24	03_009	29JUN16	9:25:00	NEUT	Abs Neutrophil	Hematology	5.3	K/uL	1.5	7.7		5.3	K/uL	1.5	7.7		Normal				Y		Week 24			3.5	Normal	1.8	03	Entered	40	Male	13JAN16	122	MF4637	<250 mg/day	No	No	>=250 mg/day	No	Yes	Yes	Yes	Yes
Week 24	03_009	29JUN16	9:25:00	NEUTLE	Neutrophils	Hematology	73	%	45	79		73	%	45	79		Normal				Y		Week 24			53	Normal	20	03	Entered	40	Male	13JAN16	122	MF4637	<250 mg/day	No	No	>=250 mg/day	No	Yes	Yes	Yes	Yes
Week 24	03_009	29JUN16	9:25:00	PLAT	Platelet Count	Hematology	206	K/uL	150	450		206	K/uL	150	450		Normal				Y		Week 24			291	Normal	-85	03	Entered	40	Male	13JAN16	122	MF4637	<250 mg/day	No	No	>=250 mg/day	No	Yes	Yes	Yes	Yes
Week 24	03_009	29JUN16	9:25:00	RBC	RBC	Hematology	5.35	M/uL	4.3	5.8		5.35	M/uL	4.3	5.8		Normal				Y		Week 24			5.61	Normal	-0.26	03	Entered	40	Male	13JAN16	122	MF4637	<250 mg/day	No	No	>=250 mg/day	No	Yes	Yes	Yes	Yes
Week 24	03_009	29JUN16	9:25:00	SODIUM	Sodium	Chemistry	138	mmol/L	136	145		138	mmol/L	136	145		Normal				Y		Week 24			143	Normal	-5	03	Entered	40	Male	13JAN16	122	MF4637	<250 mg/day	No	No	>=250 mg/day	No	Yes	Yes	Yes	Yes
Week 24	03_009	29JUN16	9:25:00	TRIG	Triglycerides	Chemistry	88	mg/dL		150		88	mg/dL		150		Normal				Y		Week 24			143	Normal	-55	03	Entered	40	Male	13JAN16	122	MF4637	<250 mg/day	No	No	>=250 mg/day	No	Yes	Yes	Yes	Yes
Week 24	03_009	29JUN16	9:25:00	TSH	TSH	TSH	1.46	uIU/mL	0.34	5.6		1.46	uIU/mL	0.34	5.6		Normal				Y		Week 24			1.35	Normal	0.11	03	Entered	40	Male	13JAN16	122	MF4637	<250 mg/day	No	No	>=250 mg/day	No	Yes	Yes	Yes	Yes
Week 24	03_009	29JUN16	9:25:00	WBC	WBC	Hematology	7.2	K/uL	4	11		7.2	K/uL	4	11		Normal				Y		Week 24			6.6	Normal	0.6	03	Entered	40	Male	13JAN16	122	MF4637	<250 mg/day	No	No	>=250 mg/day	No	Yes	Yes	Yes	Yes
Screening	03_010	03DEC15	11:00:00	ALP	Alkaline Phosphatase	Liver Function Tests	91	IU/L	32	92		91	IU/L	32	92		Normal				N		Screening			112	High		03	Entered	41	Male	12JAN16	123	Placebo	>=250 mg/day	No	No	>=250 mg/day	No	Yes	Yes	Yes	Yes
Screening	03_010	03DEC15	11:00:00	ALT	ALT	Liver Function Tests	69	IU/L	17	63		69	IU/L	17	63		High				N		Screening			64	High		03	Entered	41	Male	12JAN16	123	Placebo	>=250 mg/day	No	No	>=250 mg/day	No	Yes	Yes	Yes	Yes
Screening	03_010	03DEC15	11:00:00	AST	AST	Liver Function Tests	37	IU/L	15	41		37	IU/L	15	41		Normal				N		Screening			39	Normal		03	Entered	41	Male	12JAN16	123	Placebo	>=250 mg/day	No	No	>=250 mg/day	No	Yes	Yes	Yes	Yes
Screening	03_010	03DEC15	11:00:00	BILIT	Bilirubin Total	Liver Function Tests	0.6	mg/dL	0.3	1.2		0.6	mg/dL	0.3	1.2		Normal				N		Screening			1	Normal		03	Entered	41	Male	12JAN16	123	Placebo	>=250 mg/day	No	No	>=250 mg/day	No	Yes	Yes	Yes	Yes
Screening	03_010	03DEC15	11:00:00	GGT	GGT	Liver Function Tests	37	IU/L	7	50		37	IU/L	7	50		Normal				N		Screening			40	Normal		03	Entered	41	Male	12JAN16	123	Placebo	>=250 mg/day	No	No	>=250 mg/day	No	Yes	Yes	Yes	Yes
Screening	03_010	03DEC15	11:00:00	HBA1C	HbA1c	HbA1c	6.4	%	4	5.6		6.4	%	4	5.6		High				N	INTERPRETIVE INFORMATION: Hemoglobin A1cHemoglobin A1c values of 5.7-6.4 percent indicate an increasedrisk for developing diabetes mellitus. Hemoglobin A1c valuesgreater than or equal to 6.5 percent are diagnostic of diabetesmellitus. Diagnosis should be confirmed by repeating the Hb A1ctest.This boronate affinity Hb A1c method provides accurate analyticalresults in the presence of nearly all hem…	Screening			6.4	High		03	Entered	41	Male	12JAN16	123	Placebo	>=250 mg/day	No	No	>=250 mg/day	No	Yes	Yes	Yes	Yes
Screening	03_010	03DEC15	11:00:00	HCAB	Hepatitis C Antibody	Hepatitis C Antibody	NONREACT				NONREACT					NONREACT					N		Screening						03	Entered	41	Male	12JAN16	123	Placebo	>=250 mg/day	No	No	>=250 mg/day	No	Yes	Yes	Yes	Yes
Screening	03_010	03DEC15	11:00:00	TSH	TSH	TSH	1.66	uIU/mL	0.34	5.6		1.66	uIU/mL	0.34	5.6		Normal				N		Screening			1.66	Normal		03	Entered	41	Male	12JAN16	123	Placebo	>=250 mg/day	No	No	>=250 mg/day	No	Yes	Yes	Yes	Yes
Baseline	03_010	12JAN16	11:45:00	ALB	Albumin	Chemistry	4.3	g/dL	3.5	5.2		4.3	g/dL	3.5	5.2		Normal				N		Baseline			4.3	Normal		03	Entered	41	Male	12JAN16	123	Placebo	>=250 mg/day	No	No	>=250 mg/day	No	Yes	Yes	Yes	Yes
Baseline	03_010	12JAN16	11:45:00	ALP	Alkaline Phosphatase	Liver Function Tests	112	IU/L	32	92		112	IU/L	32	92		High				N		Baseline			112	High		03	Entered	41	Male	12JAN16	123	Placebo	>=250 mg/day	No	No	>=250 mg/day	No	Yes	Yes	Yes	Yes
Baseline	03_010	12JAN16	11:45:00	ALT	ALT	Liver Function Tests	64	IU/L	17	63		64	IU/L	17	63		High				N		Baseline			64	High		03	Entered	41	Male	12JAN16	123	Placebo	>=250 mg/day	No	No	>=250 mg/day	No	Yes	Yes	Yes	Yes
Baseline	03_010	12JAN16	11:45:00	AST	AST	Liver Function Tests	39	IU/L	15	41		39	IU/L	15	41		Normal				N		Baseline			39	Normal		03	Entered	41	Male	12JAN16	123	Placebo	>=250 mg/day	No	No	>=250 mg/day	No	Yes	Yes	Yes	Yes
Baseline	03_010	12JAN16	11:45:00	BASO	Abs Basophils	Hematology	0.0	K/uL	0	0.2		0	K/uL	0	0.2		Normal				N		Baseline			0	Normal		03	Entered	41	Male	12JAN16	123	Placebo	>=250 mg/day	No	No	>=250 mg/day	No	Yes	Yes	Yes	Yes
Baseline	03_010	12JAN16	11:45:00	BASOLE	Basophils	Hematology	0	%	0	2		0	%	0	2		Normal				N		Baseline			0	Normal		03	Entered	41	Male	12JAN16	123	Placebo	>=250 mg/day	No	No	>=250 mg/day	No	Yes	Yes	Yes	Yes
Baseline	03_010	12JAN16	11:45:00	BICARB	BiCarbonate (CO2)	Chemistry	24	mmol/L	22	32		24	mmol/L	22	32		Normal				N		Baseline			24	Normal		03	Entered	41	Male	12JAN16	123	Placebo	>=250 mg/day	No	No	>=250 mg/day	No	Yes	Yes	Yes	Yes
Baseline	03_010	12JAN16	11:45:00	BILIT	Bilirubin Total	Liver Function Tests	1.0	mg/dL	0.3	1.2		1	mg/dL	0.3	1.2		Normal				N		Baseline			1	Normal		03	Entered	41	Male	12JAN16	123	Placebo	>=250 mg/day	No	No	>=250 mg/day	No	Yes	Yes	Yes	Yes
Baseline	03_010	12JAN16	11:45:00	BUN	BUN (urea)	Chemistry	13	mg/dL	6	20		13	mg/dL	6	20		Normal				N		Baseline			13	Normal		03	Entered	41	Male	12JAN16	123	Placebo	>=250 mg/day	No	No	>=250 mg/day	No	Yes	Yes	Yes	Yes
Baseline	03_010	12JAN16	11:45:00	CA	Calcium	Chemistry	9.8	mg/dL	8.6	10		9.8	mg/dL	8.6	10		Normal				N		Baseline			9.8	Normal		03	Entered	41	Male	12JAN16	123	Placebo	>=250 mg/day	No	No	>=250 mg/day	No	Yes	Yes	Yes	Yes
Baseline	03_010	12JAN16	11:45:00	CL	Chloride	Chemistry	103	mmol/L	98	107		103	mmol/L	98	107		Normal				N		Baseline			103	Normal		03	Entered	41	Male	12JAN16	123	Placebo	>=250 mg/day	No	No	>=250 mg/day	No	Yes	Yes	Yes	Yes
Baseline	03_010	12JAN16	11:45:00	CREAT	Creatinine	Chemistry	1.1	mg/dL	0.9	1.3		1.1	mg/dL	0.9	1.3		Normal				N		Baseline			1.1	Normal		03	Entered	41	Male	12JAN16	123	Placebo	>=250 mg/day	No	No	>=250 mg/day	No	Yes	Yes	Yes	Yes
Baseline	03_010	12JAN16	11:45:00	CRPHS	hs-CRP	hs-CRP	14.01	mg/L				14.01	mg/L				Normal				N	hs-CRP CHD risk level: low risk <1.0 mg/L intermediate risk 1.0-3.0 mg/L high risk >3.0 mg/L Values >10 mg/L suggests an inflammatory disorder requiring separate evaluation. Cardiac risk assessment is not appropriate in this context.	Baseline			14.01	Normal		03	Entered	41	Male	12JAN16	123	Placebo	>=250 mg/day	No	No	>=250 mg/day	No	Yes	Yes	Yes	Yes
Baseline	03_010	12JAN16	11:45:00	EOS	Abs Eosinophils	Hematology	0.3	K/uL	0	0.6		0.3	K/uL	0	0.6		Normal				N		Baseline			0.3	Normal		03	Entered	41	Male	12JAN16	123	Placebo	>=250 mg/day	No	No	>=250 mg/day	No	Yes	Yes	Yes	Yes
Baseline	03_010	12JAN16	11:45:00	EOSLE	Eosinophils	Hematology	3	%	0	4		3	%	0	4		Normal				N		Baseline			3	Normal		03	Entered	41	Male	12JAN16	123	Placebo	>=250 mg/day	No	No	>=250 mg/day	No	Yes	Yes	Yes	Yes
Baseline	03_010	12JAN16	11:45:00	GGT	GGT	Liver Function Tests	40	IU/L	7	50		40	IU/L	7	50		Normal				N		Baseline			40	Normal		03	Entered	41	Male	12JAN16	123	Placebo	>=250 mg/day	No	No	>=250 mg/day	No	Yes	Yes	Yes	Yes
Baseline	03_010	12JAN16	11:45:00	GLUC	Glucose Random	Chemistry	104	mg/dL	70	139		104	mg/dL	70	139		Normal				N		Baseline			104	Normal		03	Entered	41	Male	12JAN16	123	Placebo	>=250 mg/day	No	No	>=250 mg/day	No	Yes	Yes	Yes	Yes
Baseline	03_010	12JAN16	11:45:00	HCT	Hematocrit	Hematology	46.3	%	38	53		46.3	%	38	53		Normal				N		Baseline			46.3	Normal		03	Entered	41	Male	12JAN16	123	Placebo	>=250 mg/day	No	No	>=250 mg/day	No	Yes	Yes	Yes	Yes
Baseline	03_010	12JAN16	11:45:00	HGB	Hemoglobin	Hematology	14.8	g/dL	13.5	17.5		14.8	g/dL	13.5	17.5		Normal				N		Baseline			14.8	Normal		03	Entered	41	Male	12JAN16	123	Placebo	>=250 mg/day	No	No	>=250 mg/day	No	Yes	Yes	Yes	Yes
Baseline	03_010	12JAN16	11:45:00	INSULIN	Insulin	Insulin	33.4	uIU/mL	1.9	23		33.4	uIU/mL	1.9	23		High				N		Baseline			33.4	High		03	Entered	41	Male	12JAN16	123	Placebo	>=250 mg/day	No	No	>=250 mg/day	No	Yes	Yes	Yes	Yes
Baseline	03_010	12JAN16	11:45:00	K	Potassium	Chemistry	4.5	mmol/L	3.5	5.1		4.5	mmol/L	3.5	5.1		Normal				N		Baseline			4.5	Normal		03	Entered	41	Male	12JAN16	123	Placebo	>=250 mg/day	No	No	>=250 mg/day	No	Yes	Yes	Yes	Yes
Baseline	03_010	12JAN16	11:45:00	LYM	Abs Lymphocytes	Hematology	2.5	K/uL	0.8	4		2.5	K/uL	0.8	4		Normal				N		Baseline			2.5	Normal		03	Entered	41	Male	12JAN16	123	Placebo	>=250 mg/day	No	No	>=250 mg/day	No	Yes	Yes	Yes	Yes
Baseline	03_010	12JAN16	11:45:00	LYMLE	Lymphocytes	Hematology	24	%	20	50		24	%	20	50		Normal				N		Baseline			24	Normal		03	Entered	41	Male	12JAN16	123	Placebo	>=250 mg/day	No	No	>=250 mg/day	No	Yes	Yes	Yes	Yes
Baseline	03_010	12JAN16	11:45:00	MONO	Abs Monocytes	Hematology	0.5	K/uL	0	0.9		0.5	K/uL	0	0.9		Normal				N		Baseline			0.5	Normal		03	Entered	41	Male	12JAN16	123	Placebo	>=250 mg/day	No	No	>=250 mg/day	No	Yes	Yes	Yes	Yes
Baseline	03_010	12JAN16	11:45:00	MONOLE	Monocytes	Hematology	5	%	1	9		5	%	1	9		Normal				N		Baseline			5	Normal		03	Entered	41	Male	12JAN16	123	Placebo	>=250 mg/day	No	No	>=250 mg/day	No	Yes	Yes	Yes	Yes
Baseline	03_010	12JAN16	11:45:00	NEUT	Abs Neutrophil	Hematology	7.0	K/uL	1.5	7.7		7	K/uL	1.5	7.7		Normal				N		Baseline			7	Normal		03	Entered	41	Male	12JAN16	123	Placebo	>=250 mg/day	No	No	>=250 mg/day	No	Yes	Yes	Yes	Yes
Baseline	03_010	12JAN16	11:45:00	NEUTLE	Neutrophils	Hematology	67	%	45	79		67	%	45	79		Normal				N		Baseline			67	Normal		03	Entered	41	Male	12JAN16	123	Placebo	>=250 mg/day	No	No	>=250 mg/day	No	Yes	Yes	Yes	Yes
Baseline	03_010	12JAN16	11:45:00	PLAT	Platelet Count	Hematology	287	K/uL	150	450		287	K/uL	150	450		Normal				N		Baseline			287	Normal		03	Entered	41	Male	12JAN16	123	Placebo	>=250 mg/day	No	No	>=250 mg/day	No	Yes	Yes	Yes	Yes
Baseline	03_010	12JAN16	11:45:00	RBC	RBC	Hematology	5.26	M/uL	4.3	5.8		5.26	M/uL	4.3	5.8		Normal				N		Baseline			5.26	Normal		03	Entered	41	Male	12JAN16	123	Placebo	>=250 mg/day	No	No	>=250 mg/day	No	Yes	Yes	Yes	Yes
Baseline	03_010	12JAN16	11:45:00	SODIUM	Sodium	Chemistry	141	mmol/L	136	145		141	mmol/L	136	145		Normal				N		Baseline			141	Normal		03	Entered	41	Male	12JAN16	123	Placebo	>=250 mg/day	No	No	>=250 mg/day	No	Yes	Yes	Yes	Yes
Baseline	03_010	12JAN16	11:45:00	TRIG	Triglycerides	Chemistry	136	mg/dL		150		136	mg/dL		150		Normal				N		Baseline			136	Normal		03	Entered	41	Male	12JAN16	123	Placebo	>=250 mg/day	No	No	>=250 mg/day	No	Yes	Yes	Yes	Yes
Baseline	03_010	12JAN16	11:45:00	WBC	WBC	Hematology	10.5	K/uL	4	11		10.5	K/uL	4	11		Normal				N		Baseline			10.5	Normal		03	Entered	41	Male	12JAN16	123	Placebo	>=250 mg/day	No	No	>=250 mg/day	No	Yes	Yes	Yes	Yes
Week 12	03_010	25MAR16	9:30:00	ALP	Alkaline Phosphatase	Liver Function Tests	123	IU/L	32	92		123	IU/L	32	92		High				N		Week 12			112	High	11	03	Entered	41	Male	12JAN16	123	Placebo	>=250 mg/day	No	No	>=250 mg/day	No	Yes	Yes	Yes	Yes
Week 12	03_010	25MAR16	9:30:00	ALT	ALT	Liver Function Tests	112	IU/L	17	63		112	IU/L	17	63		High				N		Week 12			64	High	48	03	Entered	41	Male	12JAN16	123	Placebo	>=250 mg/day	No	No	>=250 mg/day	No	Yes	Yes	Yes	Yes
Week 12	03_010	25MAR16	9:30:00	AST	AST	Liver Function Tests	47	IU/L	15	41		47	IU/L	15	41		High				N		Week 12			39	Normal	8	03	Entered	41	Male	12JAN16	123	Placebo	>=250 mg/day	No	No	>=250 mg/day	No	Yes	Yes	Yes	Yes
Week 12	03_010	25MAR16	9:30:00	BASO	Abs Basophils	Hematology	0.1	K/uL	0	0.2		0.1	K/uL	0	0.2		Normal				N		Week 12			0	Normal	0.1	03	Entered	41	Male	12JAN16	123	Placebo	>=250 mg/day	No	No	>=250 mg/day	No	Yes	Yes	Yes	Yes
Week 12	03_010	25MAR16	9:30:00	BASOLE	Basophils	Hematology	1	%	0	2		1	%	0	2		Normal				N		Week 12			0	Normal	1	03	Entered	41	Male	12JAN16	123	Placebo	>=250 mg/day	No	No	>=250 mg/day	No	Yes	Yes	Yes	Yes
Week 12	03_010	25MAR16	9:30:00	BILIT	Bilirubin Total	Liver Function Tests	0.4	mg/dL	0.3	1.2		0.4	mg/dL	0.3	1.2		Normal				N		Week 12			1	Normal	-0.6	03	Entered	41	Male	12JAN16	123	Placebo	>=250 mg/day	No	No	>=250 mg/day	No	Yes	Yes	Yes	Yes
Week 12	03_010	25MAR16	9:30:00	EOS	Abs Eosinophils	Hematology	0.5	K/uL	0	0.6		0.5	K/uL	0	0.6		Normal				N		Week 12			0.3	Normal	0.2	03	Entered	41	Male	12JAN16	123	Placebo	>=250 mg/day	No	No	>=250 mg/day	No	Yes	Yes	Yes	Yes
Week 12	03_010	25MAR16	9:30:00	EOSLE	Eosinophils	Hematology	5	%	0	4		5	%	0	4		High				N		Week 12			3	Normal	2	03	Entered	41	Male	12JAN16	123	Placebo	>=250 mg/day	No	No	>=250 mg/day	No	Yes	Yes	Yes	Yes
Week 12	03_010	25MAR16	9:30:00	GGT	GGT	Liver Function Tests	46	IU/L	7	50		46	IU/L	7	50		Normal				N		Week 12			40	Normal	6	03	Entered	41	Male	12JAN16	123	Placebo	>=250 mg/day	No	No	>=250 mg/day	No	Yes	Yes	Yes	Yes
Week 12	03_010	25MAR16	9:30:00	HCT	Hematocrit	Hematology	44.2	%	38	53		44.2	%	38	53		Normal				N		Week 12			46.3	Normal	-2.1	03	Entered	41	Male	12JAN16	123	Placebo	>=250 mg/day	No	No	>=250 mg/day	No	Yes	Yes	Yes	Yes
Week 12	03_010	25MAR16	9:30:00	HGB	Hemoglobin	Hematology	14.2	g/dL	13.5	17.5		14.2	g/dL	13.5	17.5		Normal				N		Week 12			14.8	Normal	-0.6	03	Entered	41	Male	12JAN16	123	Placebo	>=250 mg/day	No	No	>=250 mg/day	No	Yes	Yes	Yes	Yes
Week 12	03_010	25MAR16	9:30:00	LYM	Abs Lymphocytes	Hematology	2.1	K/uL	0.8	4		2.1	K/uL	0.8	4		Normal				N		Week 12			2.5	Normal	-0.4	03	Entered	41	Male	12JAN16	123	Placebo	>=250 mg/day	No	No	>=250 mg/day	No	Yes	Yes	Yes	Yes
Week 12	03_010	25MAR16	9:30:00	LYMLE	Lymphocytes	Hematology	20	%	20	50		20	%	20	50		Normal				N		Week 12			24	Normal	-4	03	Entered	41	Male	12JAN16	123	Placebo	>=250 mg/day	No	No	>=250 mg/day	No	Yes	Yes	Yes	Yes
Week 12	03_010	25MAR16	9:30:00	MONO	Abs Monocytes	Hematology	0.5	K/uL	0	0.9		0.5	K/uL	0	0.9		Normal				N		Week 12			0.5	Normal	0	03	Entered	41	Male	12JAN16	123	Placebo	>=250 mg/day	No	No	>=250 mg/day	No	Yes	Yes	Yes	Yes
Week 12	03_010	25MAR16	9:30:00	MONOLE	Monocytes	Hematology	5	%	1	9		5	%	1	9		Normal				N		Week 12			5	Normal	0	03	Entered	41	Male	12JAN16	123	Placebo	>=250 mg/day	No	No	>=250 mg/day	No	Yes	Yes	Yes	Yes
Week 12	03_010	25MAR16	9:30:00	NEUT	Abs Neutrophil	Hematology	7.3	K/uL	1.5	7.7		7.3	K/uL	1.5	7.7		Normal				N		Week 12			7	Normal	0.3	03	Entered	41	Male	12JAN16	123	Placebo	>=250 mg/day	No	No	>=250 mg/day	No	Yes	Yes	Yes	Yes
Week 12	03_010	25MAR16	9:30:00	NEUTLE	Neutrophils	Hematology	68	%	45	79		68	%	45	79		Normal				N		Week 12			67	Normal	1	03	Entered	41	Male	12JAN16	123	Placebo	>=250 mg/day	No	No	>=250 mg/day	No	Yes	Yes	Yes	Yes
Week 12	03_010	25MAR16	9:30:00	PLAT	Platelet Count	Hematology	272	K/uL	150	450		272	K/uL	150	450		Normal				N		Week 12			287	Normal	-15	03	Entered	41	Male	12JAN16	123	Placebo	>=250 mg/day	No	No	>=250 mg/day	No	Yes	Yes	Yes	Yes
Week 12	03_010	25MAR16	9:30:00	RBC	RBC	Hematology	5.03	M/uL	4.3	5.8		5.03	M/uL	4.3	5.8		Normal				N		Week 12			5.26	Normal	-0.23	03	Entered	41	Male	12JAN16	123	Placebo	>=250 mg/day	No	No	>=250 mg/day	No	Yes	Yes	Yes	Yes
Week 12	03_010	25MAR16	9:30:00	WBC	WBC	Hematology	10.7	K/uL	4	11		10.7	K/uL	4	11		Normal				N		Week 12			10.5	Normal	0.2	03	Entered	41	Male	12JAN16	123	Placebo	>=250 mg/day	No	No	>=250 mg/day	No	Yes	Yes	Yes	Yes
Week 24	03_010	24JUN16	9:45:00	ALB	Albumin	Chemistry	4.1	g/dL	3.5	5.2		4.1	g/dL	3.5	5.2		Normal				Y		Week 24			4.3	Normal	-0.2	03	Entered	41	Male	12JAN16	123	Placebo	>=250 mg/day	No	No	>=250 mg/day	No	Yes	Yes	Yes	Yes
Week 24	03_010	24JUN16	9:45:00	ALP	Alkaline Phosphatase	Liver Function Tests	92	IU/L	32	92		92	IU/L	32	92		Normal				Y		Week 24			112	High	-20	03	Entered	41	Male	12JAN16	123	Placebo	>=250 mg/day	No	No	>=250 mg/day	No	Yes	Yes	Yes	Yes
Week 24	03_010	24JUN16	9:45:00	ALT	ALT	Liver Function Tests	42	IU/L	17	63		42	IU/L	17	63		Normal				Y		Week 24			64	High	-22	03	Entered	41	Male	12JAN16	123	Placebo	>=250 mg/day	No	No	>=250 mg/day	No	Yes	Yes	Yes	Yes
Week 24	03_010	24JUN16	9:45:00	AST	AST	Liver Function Tests	25	IU/L	15	41		25	IU/L	15	41		Normal				Y		Week 24			39	Normal	-14	03	Entered	41	Male	12JAN16	123	Placebo	>=250 mg/day	No	No	>=250 mg/day	No	Yes	Yes	Yes	Yes
Week 24	03_010	24JUN16	9:45:00	BASO	Abs Basophils	Hematology	0.0	K/uL	0	0.2		0	K/uL	0	0.2		Normal				Y		Week 24			0	Normal	0	03	Entered	41	Male	12JAN16	123	Placebo	>=250 mg/day	No	No	>=250 mg/day	No	Yes	Yes	Yes	Yes
Week 24	03_010	24JUN16	9:45:00	BASOLE	Basophils	Hematology	0	%	0	2		0	%	0	2		Normal				Y		Week 24			0	Normal	0	03	Entered	41	Male	12JAN16	123	Placebo	>=250 mg/day	No	No	>=250 mg/day	No	Yes	Yes	Yes	Yes
Week 24	03_010	24JUN16	9:45:00	BICARB	BiCarbonate (CO2)	Chemistry	19	mmol/L	22	32		19	mmol/L	22	32		Low				Y		Week 24			24	Normal	-5	03	Entered	41	Male	12JAN16	123	Placebo	>=250 mg/day	No	No	>=250 mg/day	No	Yes	Yes	Yes	Yes
Week 24	03_010	24JUN16	9:45:00	BILIT	Bilirubin Total	Liver Function Tests	0.5	mg/dL	0.3	1.2		0.5	mg/dL	0.3	1.2		Normal				Y		Week 24			1	Normal	-0.5	03	Entered	41	Male	12JAN16	123	Placebo	>=250 mg/day	No	No	>=250 mg/day	No	Yes	Yes	Yes	Yes
Week 24	03_010	24JUN16	9:45:00	BUN	BUN (urea)	Chemistry	14	mg/dL	6	20		14	mg/dL	6	20		Normal				Y		Week 24			13	Normal	1	03	Entered	41	Male	12JAN16	123	Placebo	>=250 mg/day	No	No	>=250 mg/day	No	Yes	Yes	Yes	Yes
Week 24	03_010	24JUN16	9:45:00	CA	Calcium	Chemistry	7.2	mg/dL	8.6	10		7.2	mg/dL	8.6	10		Low				Y		Week 24	CS- PI REQUESTS CALCIUM REDRAW	Yes	9.8	Normal	-2.6	03	Entered	41	Male	12JAN16	123	Placebo	>=250 mg/day	No	No	>=250 mg/day	No	Yes	Yes	Yes	Yes
Week 24	03_010	24JUN16	9:45:00	CL	Chloride	Chemistry	106	mmol/L	98	107		106	mmol/L	98	107		Normal				Y		Week 24			103	Normal	3	03	Entered	41	Male	12JAN16	123	Placebo	>=250 mg/day	No	No	>=250 mg/day	No	Yes	Yes	Yes	Yes
Week 24	03_010	24JUN16	9:45:00	CREAT	Creatinine	Chemistry	0.9	mg/dL	0.9	1.3		0.9	mg/dL	0.9	1.3		Normal				Y		Week 24			1.1	Normal	-0.2	03	Entered	41	Male	12JAN16	123	Placebo	>=250 mg/day	No	No	>=250 mg/day	No	Yes	Yes	Yes	Yes
Week 24	03_010	24JUN16	9:45:00	CRPHS	hs-CRP	hs-CRP	10.00	mg/L				10	mg/L				Normal				Y	hs-CRP CHD risk level: low risk <1.0 mg/L intermediate risk 1.0-3.0 mg/L high risk >3.0 mg/L Values >10 mg/L suggests an inflammatory disorder requiring separate evaluation. Cardiac risk assessment is not appropriate in this context.	Week 24			14.01	Normal	-4.01	03	Entered	41	Male	12JAN16	123	Placebo	>=250 mg/day	No	No	>=250 mg/day	No	Yes	Yes	Yes	Yes
Week 24	03_010	24JUN16	9:45:00	EOS	Abs Eosinophils	Hematology	0.4	K/uL	0	0.6		0.4	K/uL	0	0.6		Normal				Y		Week 24			0.3	Normal	0.1	03	Entered	41	Male	12JAN16	123	Placebo	>=250 mg/day	No	No	>=250 mg/day	No	Yes	Yes	Yes	Yes
Week 24	03_010	24JUN16	9:45:00	EOSLE	Eosinophils	Hematology	4	%	0	4		4	%	0	4		Normal				Y		Week 24			3	Normal	1	03	Entered	41	Male	12JAN16	123	Placebo	>=250 mg/day	No	No	>=250 mg/day	No	Yes	Yes	Yes	Yes
Week 24	03_010	24JUN16	9:45:00	GGT	GGT	Liver Function Tests	27	IU/L	7	50		27	IU/L	7	50		Normal				Y		Week 24			40	Normal	-13	03	Entered	41	Male	12JAN16	123	Placebo	>=250 mg/day	No	No	>=250 mg/day	No	Yes	Yes	Yes	Yes
Week 24	03_010	24JUN16	9:45:00	GLUCF	Glucose Fasting	Chemistry	106	mg/dL	70	99		106	mg/dL	70	99		High				Y		Week 24						03	Entered	41	Male	12JAN16	123	Placebo	>=250 mg/day	No	No	>=250 mg/day	No	Yes	Yes	Yes	Yes
Week 24	03_010	24JUN16	9:45:00	HBA1C	HbA1c	HbA1c	5.9	%	4	5.6		5.9	%	4	5.6		High				Y	INTERPRETIVE INFORMATION: Hemoglobin A1cHemoglobin A1c values of 5.7-6.4 percent indicate an increasedrisk for developing diabetes mellitus. Hemoglobin A1c valuesgreater than or equal to 6.5 percent are diagnostic of diabetesmellitus. Diagnosis should be confirmed by repeating the Hb A1ctest.This boronate affinity Hb A1c method provides accurate analyticalresults in the presence of nearly all hem…	Week 24			6.4	High	-0.5	03	Entered	41	Male	12JAN16	123	Placebo	>=250 mg/day	No	No	>=250 mg/day	No	Yes	Yes	Yes	Yes
Week 24	03_010	24JUN16	9:45:00	HCT	Hematocrit	Hematology	45.6	%	38	53		45.6	%	38	53		Normal				Y		Week 24			46.3	Normal	-0.7	03	Entered	41	Male	12JAN16	123	Placebo	>=250 mg/day	No	No	>=250 mg/day	No	Yes	Yes	Yes	Yes
Week 24	03_010	24JUN16	9:45:00	HGB	Hemoglobin	Hematology	14.1	g/dL	13.5	17.5		14.1	g/dL	13.5	17.5		Normal				Y		Week 24			14.8	Normal	-0.7	03	Entered	41	Male	12JAN16	123	Placebo	>=250 mg/day	No	No	>=250 mg/day	No	Yes	Yes	Yes	Yes
Week 24	03_010	24JUN16	9:45:00	INSULIN	Insulin	Insulin	34.5	uIU/mL	1.9	23		34.5	uIU/mL	1.9	23		High				Y		Week 24			33.4	High	1.1	03	Entered	41	Male	12JAN16	123	Placebo	>=250 mg/day	No	No	>=250 mg/day	No	Yes	Yes	Yes	Yes
Week 24	03_010	24JUN16	9:45:00	K	Potassium	Chemistry	5.2	mmol/L	3.5	5.1		5.2	mmol/L	3.5	5.1		High				Y		Week 24			4.5	Normal	0.7	03	Entered	41	Male	12JAN16	123	Placebo	>=250 mg/day	No	No	>=250 mg/day	No	Yes	Yes	Yes	Yes
Week 24	03_010	24JUN16	9:45:00	LYM	Abs Lymphocytes	Hematology	2.3	K/uL	0.8	4		2.3	K/uL	0.8	4		Normal				Y		Week 24			2.5	Normal	-0.2	03	Entered	41	Male	12JAN16	123	Placebo	>=250 mg/day	No	No	>=250 mg/day	No	Yes	Yes	Yes	Yes
Week 24	03_010	24JUN16	9:45:00	LYMLE	Lymphocytes	Hematology	26	%	20	50		26	%	20	50		Normal				Y		Week 24			24	Normal	2	03	Entered	41	Male	12JAN16	123	Placebo	>=250 mg/day	No	No	>=250 mg/day	No	Yes	Yes	Yes	Yes
Week 24	03_010	24JUN16	9:45:00	MONO	Abs Monocytes	Hematology	0.5	K/uL	0	0.9		0.5	K/uL	0	0.9		Normal				Y		Week 24			0.5	Normal	0	03	Entered	41	Male	12JAN16	123	Placebo	>=250 mg/day	No	No	>=250 mg/day	No	Yes	Yes	Yes	Yes
Week 24	03_010	24JUN16	9:45:00	MONOLE	Monocytes	Hematology	5	%	1	9		5	%	1	9		Normal				Y		Week 24			5	Normal	0	03	Entered	41	Male	12JAN16	123	Placebo	>=250 mg/day	No	No	>=250 mg/day	No	Yes	Yes	Yes	Yes
Week 24	03_010	24JUN16	9:45:00	NEUT	Abs Neutrophil	Hematology	5.9	K/uL	1.5	7.7		5.9	K/uL	1.5	7.7		Normal				Y		Week 24			7	Normal	-1.1	03	Entered	41	Male	12JAN16	123	Placebo	>=250 mg/day	No	No	>=250 mg/day	No	Yes	Yes	Yes	Yes
Week 24	03_010	24JUN16	9:45:00	NEUTLE	Neutrophils	Hematology	65	%	45	79		65	%	45	79		Normal				Y		Week 24			67	Normal	-2	03	Entered	41	Male	12JAN16	123	Placebo	>=250 mg/day	No	No	>=250 mg/day	No	Yes	Yes	Yes	Yes
Week 24	03_010	24JUN16	9:45:00	PLAT	Platelet Count	Hematology	276	K/uL	150	450		276	K/uL	150	450		Normal				Y		Week 24			287	Normal	-11	03	Entered	41	Male	12JAN16	123	Placebo	>=250 mg/day	No	No	>=250 mg/day	No	Yes	Yes	Yes	Yes
Week 24	03_010	24JUN16	9:45:00	RBC	RBC	Hematology	5.17	M/uL	4.3	5.8		5.17	M/uL	4.3	5.8		Normal				Y		Week 24			5.26	Normal	-0.09	03	Entered	41	Male	12JAN16	123	Placebo	>=250 mg/day	No	No	>=250 mg/day	No	Yes	Yes	Yes	Yes
Week 24	03_010	24JUN16	9:45:00	SODIUM	Sodium	Chemistry	139	mmol/L	136	145		139	mmol/L	136	145		Normal				Y		Week 24			141	Normal	-2	03	Entered	41	Male	12JAN16	123	Placebo	>=250 mg/day	No	No	>=250 mg/day	No	Yes	Yes	Yes	Yes
Week 24	03_010	24JUN16	9:45:00	TRIG	Triglycerides	Chemistry	91	mg/dL		150		91	mg/dL		150		Normal				Y		Week 24			136	Normal	-45	03	Entered	41	Male	12JAN16	123	Placebo	>=250 mg/day	No	No	>=250 mg/day	No	Yes	Yes	Yes	Yes
Week 24	03_010	24JUN16	9:45:00	TSH	TSH	TSH	0.89	uIU/mL	0.34	5.6		0.89	uIU/mL	0.34	5.6		Normal				Y		Week 24			1.66	Normal	-0.77	03	Entered	41	Male	12JAN16	123	Placebo	>=250 mg/day	No	No	>=250 mg/day	No	Yes	Yes	Yes	Yes
Week 24	03_010	24JUN16	9:45:00	WBC	WBC	Hematology	9.0	K/uL	4	11		9	K/uL	4	11		Normal				Y		Week 24			10.5	Normal	-1.5	03	Entered	41	Male	12JAN16	123	Placebo	>=250 mg/day	No	No	>=250 mg/day	No	Yes	Yes	Yes	Yes
Retest	03_010	19JUL16	13:00:00	ALB	Albumin	Chemistry	3.9	g/dL	3.5	5.2		3.9	g/dL	3.5	5.2		Normal				Y		Retest			4.3	Normal	-0.4	03	Entered	41	Male	12JAN16	123	Placebo	>=250 mg/day	No	No	>=250 mg/day	No	Yes	Yes	Yes	Yes
Retest	03_010	19JUL16	13:00:00	ALP	Alkaline Phosphatase	Liver Function Tests	104	IU/L	32	92		104	IU/L	32	92		High				Y		Retest			112	High	-8	03	Entered	41	Male	12JAN16	123	Placebo	>=250 mg/day	No	No	>=250 mg/day	No	Yes	Yes	Yes	Yes
Retest	03_010	19JUL16	13:00:00	ALT	ALT	Liver Function Tests	30	IU/L	17	63		30	IU/L	17	63		Normal				Y		Retest			64	High	-34	03	Entered	41	Male	12JAN16	123	Placebo	>=250 mg/day	No	No	>=250 mg/day	No	Yes	Yes	Yes	Yes
Retest	03_010	19JUL16	13:00:00	AST	AST	Liver Function Tests	21	IU/L	15	41		21	IU/L	15	41		Normal				Y		Retest			39	Normal	-18	03	Entered	41	Male	12JAN16	123	Placebo	>=250 mg/day	No	No	>=250 mg/day	No	Yes	Yes	Yes	Yes
Retest	03_010	19JUL16	13:00:00	BASO	Abs Basophils	Hematology	0.1	K/uL	0	0.2		0.1	K/uL	0	0.2		Normal				Y		Retest			0	Normal	0.1	03	Entered	41	Male	12JAN16	123	Placebo	>=250 mg/day	No	No	>=250 mg/day	No	Yes	Yes	Yes	Yes
Retest	03_010	19JUL16	13:00:00	BASOLE	Basophils	Hematology	1	%	0	2		1	%	0	2		Normal				Y		Retest			0	Normal	1	03	Entered	41	Male	12JAN16	123	Placebo	>=250 mg/day	No	No	>=250 mg/day	No	Yes	Yes	Yes	Yes
Retest	03_010	19JUL16	13:00:00	BICARB	BiCarbonate (CO2)	Chemistry	21	mmol/L	22	32		21	mmol/L	22	32		Low				Y		Retest			24	Normal	-3	03	Entered	41	Male	12JAN16	123	Placebo	>=250 mg/day	No	No	>=250 mg/day	No	Yes	Yes	Yes	Yes
Retest	03_010	19JUL16	13:00:00	BILIT	Bilirubin Total	Liver Function Tests	0.6	mg/dL	0.3	1.2		0.6	mg/dL	0.3	1.2		Normal				Y		Retest			1	Normal	-0.4	03	Entered	41	Male	12JAN16	123	Placebo	>=250 mg/day	No	No	>=250 mg/day	No	Yes	Yes	Yes	Yes
Retest	03_010	19JUL16	13:00:00	BUN	BUN (urea)	Chemistry	11	mg/dL	6	20		11	mg/dL	6	20		Normal				Y		Retest			13	Normal	-2	03	Entered	41	Male	12JAN16	123	Placebo	>=250 mg/day	No	No	>=250 mg/day	No	Yes	Yes	Yes	Yes
Retest	03_010	19JUL16	13:00:00	CA	Calcium	Chemistry	8.8	mg/dL	8.6	10		8.8	mg/dL	8.6	10		Normal				Y		Retest	CA- PI REQUESTED CALCIUM REDRAW	Yes	9.8	Normal	-1	03	Entered	41	Male	12JAN16	123	Placebo	>=250 mg/day	No	No	>=250 mg/day	No	Yes	Yes	Yes	Yes
Retest	03_010	19JUL16	13:00:00	CL	Chloride	Chemistry	106	mmol/L	98	107		106	mmol/L	98	107		Normal				Y		Retest			103	Normal	3	03	Entered	41	Male	12JAN16	123	Placebo	>=250 mg/day	No	No	>=250 mg/day	No	Yes	Yes	Yes	Yes
Retest	03_010	19JUL16	13:00:00	CREAT	Creatinine	Chemistry	0.9	mg/dL	0.9	1.3		0.9	mg/dL	0.9	1.3		Normal				Y		Retest			1.1	Normal	-0.2	03	Entered	41	Male	12JAN16	123	Placebo	>=250 mg/day	No	No	>=250 mg/day	No	Yes	Yes	Yes	Yes
Retest	03_010	19JUL16	13:00:00	CRPHS	hs-CRP	hs-CRP	9.90	mg/L				9.9	mg/L				Normal				Y	hs-CRP CHD risk level: low risk <1.0 mg/L intermediate risk 1.0-3.0 mg/L high risk >3.0 mg/L Values >10 mg/L suggests an inflammatory disorder requiring separate evaluation. Cardiac risk assessment is not appropriate in this context.	Retest			14.01	Normal	-4.11	03	Entered	41	Male	12JAN16	123	Placebo	>=250 mg/day	No	No	>=250 mg/day	No	Yes	Yes	Yes	Yes
Retest	03_010	19JUL16	13:00:00	EOS	Abs Eosinophils	Hematology	0.4	K/uL	0	0.6		0.4	K/uL	0	0.6		Normal				Y		Retest			0.3	Normal	0.1	03	Entered	41	Male	12JAN16	123	Placebo	>=250 mg/day	No	No	>=250 mg/day	No	Yes	Yes	Yes	Yes
Retest	03_010	19JUL16	13:00:00	EOSLE	Eosinophils	Hematology	4	%	0	4		4	%	0	4		Normal				Y		Retest			3	Normal	1	03	Entered	41	Male	12JAN16	123	Placebo	>=250 mg/day	No	No	>=250 mg/day	No	Yes	Yes	Yes	Yes
Retest	03_010	19JUL16	13:00:00	GGT	GGT	Liver Function Tests	26	IU/L	7	50		26	IU/L	7	50		Normal				Y		Retest			40	Normal	-14	03	Entered	41	Male	12JAN16	123	Placebo	>=250 mg/day	No	No	>=250 mg/day	No	Yes	Yes	Yes	Yes
Retest	03_010	19JUL16	13:00:00	GLUCF	Glucose Fasting	Chemistry	84	mg/dL	70	99		84	mg/dL	70	99		Normal				Y		Retest						03	Entered	41	Male	12JAN16	123	Placebo	>=250 mg/day	No	No	>=250 mg/day	No	Yes	Yes	Yes	Yes
Retest	03_010	19JUL16	13:00:00	HBA1C	HbA1c	HbA1c	6.0	%	4	5.6		6	%	4	5.6		High				Y	INTERPRETIVE INFORMATION: Hemoglobin A1cHemoglobin A1c values of 5.7-6.4 percent indicate an increasedrisk for developing diabetes mellitus. Hemoglobin A1c valuesgreater than or equal to 6.5 percent are diagnostic of diabetesmellitus. Diagnosis should be confirmed by repeating the Hb A1ctest.This boronate affinity Hb A1c method provides accurate analyticalresults in the presence of nearly all hem…	Retest			6.4	High	-0.4	03	Entered	41	Male	12JAN16	123	Placebo	>=250 mg/day	No	No	>=250 mg/day	No	Yes	Yes	Yes	Yes
Retest	03_010	19JUL16	13:00:00	HCAB	Hepatitis C Antibody	Hepatitis C Antibody	NONREACT				NONREACT					NONREACT					Y		Retest						03	Entered	41	Male	12JAN16	123	Placebo	>=250 mg/day	No	No	>=250 mg/day	No	Yes	Yes	Yes	Yes
Retest	03_010	19JUL16	13:00:00	HCT	Hematocrit	Hematology	44.7	%	38	53		44.7	%	38	53		Normal				Y		Retest			46.3	Normal	-1.6	03	Entered	41	Male	12JAN16	123	Placebo	>=250 mg/day	No	No	>=250 mg/day	No	Yes	Yes	Yes	Yes
Retest	03_010	19JUL16	13:00:00	HGB	Hemoglobin	Hematology	13.8	g/dL	13.5	17.5		13.8	g/dL	13.5	17.5		Normal				Y		Retest			14.8	Normal	-1	03	Entered	41	Male	12JAN16	123	Placebo	>=250 mg/day	No	No	>=250 mg/day	No	Yes	Yes	Yes	Yes
Retest	03_010	19JUL16	13:00:00	INSULIN	Insulin	Insulin	25.6	uIU/mL	1.9	23		25.6	uIU/mL	1.9	23		High				Y		Retest			33.4	High	-7.8	03	Entered	41	Male	12JAN16	123	Placebo	>=250 mg/day	No	No	>=250 mg/day	No	Yes	Yes	Yes	Yes
Retest	03_010	19JUL16	13:00:00	K	Potassium	Chemistry	4.3	mmol/L	3.5	5.1		4.3	mmol/L	3.5	5.1		Normal				Y		Retest			4.5	Normal	-0.2	03	Entered	41	Male	12JAN16	123	Placebo	>=250 mg/day	No	No	>=250 mg/day	No	Yes	Yes	Yes	Yes
Retest	03_010	19JUL16	13:00:00	LYM	Abs Lymphocytes	Hematology	2.4	K/uL	0.8	4		2.4	K/uL	0.8	4		Normal				Y		Retest			2.5	Normal	-0.1	03	Entered	41	Male	12JAN16	123	Placebo	>=250 mg/day	No	No	>=250 mg/day	No	Yes	Yes	Yes	Yes
Retest	03_010	19JUL16	13:00:00	LYMLE	Lymphocytes	Hematology	27	%	20	50		27	%	20	50		Normal				Y		Retest			24	Normal	3	03	Entered	41	Male	12JAN16	123	Placebo	>=250 mg/day	No	No	>=250 mg/day	No	Yes	Yes	Yes	Yes
Retest	03_010	19JUL16	13:00:00	MONO	Abs Monocytes	Hematology	0.4	K/uL	0	0.9		0.4	K/uL	0	0.9		Normal				Y		Retest			0.5	Normal	-0.1	03	Entered	41	Male	12JAN16	123	Placebo	>=250 mg/day	No	No	>=250 mg/day	No	Yes	Yes	Yes	Yes
Retest	03_010	19JUL16	13:00:00	MONOLE	Monocytes	Hematology	4	%	1	9		4	%	1	9		Normal				Y		Retest			5	Normal	-1	03	Entered	41	Male	12JAN16	123	Placebo	>=250 mg/day	No	No	>=250 mg/day	No	Yes	Yes	Yes	Yes
Retest	03_010	19JUL16	13:00:00	NEUT	Abs Neutrophil	Hematology	5.8	K/uL	1.5	7.7		5.8	K/uL	1.5	7.7		Normal				Y		Retest			7	Normal	-1.2	03	Entered	41	Male	12JAN16	123	Placebo	>=250 mg/day	No	No	>=250 mg/day	No	Yes	Yes	Yes	Yes
Retest	03_010	19JUL16	13:00:00	NEUTLE	Neutrophils	Hematology	64	%	45	79		64	%	45	79		Normal				Y		Retest			67	Normal	-3	03	Entered	41	Male	12JAN16	123	Placebo	>=250 mg/day	No	No	>=250 mg/day	No	Yes	Yes	Yes	Yes
Retest	03_010	19JUL16	13:00:00	PLAT	Platelet Count	Hematology	305	K/uL	150	450		305	K/uL	150	450		Normal				Y		Retest			287	Normal	18	03	Entered	41	Male	12JAN16	123	Placebo	>=250 mg/day	No	No	>=250 mg/day	No	Yes	Yes	Yes	Yes
Retest	03_010	19JUL16	13:00:00	RBC	RBC	Hematology	5.09	M/uL	4.3	5.8		5.09	M/uL	4.3	5.8		Normal				Y		Retest			5.26	Normal	-0.17	03	Entered	41	Male	12JAN16	123	Placebo	>=250 mg/day	No	No	>=250 mg/day	No	Yes	Yes	Yes	Yes
Retest	03_010	19JUL16	13:00:00	SODIUM	Sodium	Chemistry	136	mmol/L	136	145		136	mmol/L	136	145		Normal				Y		Retest			141	Normal	-5	03	Entered	41	Male	12JAN16	123	Placebo	>=250 mg/day	No	No	>=250 mg/day	No	Yes	Yes	Yes	Yes
Retest	03_010	19JUL16	13:00:00	TRIG	Triglycerides	Chemistry	81	mg/dL		150		81	mg/dL		150		Normal				Y		Retest			136	Normal	-55	03	Entered	41	Male	12JAN16	123	Placebo	>=250 mg/day	No	No	>=250 mg/day	No	Yes	Yes	Yes	Yes
Retest	03_010	19JUL16	13:00:00	TSH	TSH	TSH	0.66	uIU/mL	0.34	5.6		0.66	uIU/mL	0.34	5.6		Normal				Y		Retest			1.66	Normal	-1	03	Entered	41	Male	12JAN16	123	Placebo	>=250 mg/day	No	No	>=250 mg/day	No	Yes	Yes	Yes	Yes
Retest	03_010	19JUL16	13:00:00	WBC	WBC	Hematology	9.0	K/uL	4	11		9	K/uL	4	11		Normal				Y		Retest			10.5	Normal	-1.5	03	Entered	41	Male	12JAN16	123	Placebo	>=250 mg/day	No	No	>=250 mg/day	No	Yes	Yes	Yes	Yes
Screening	03_011	21DEC15	17:30:00	ALP	Alkaline Phosphatase	Liver Function Tests	64	IU/L	32	92		64	IU/L	32	92		Normal				N		Screening			72	Normal		03	Entered	55	Male	11FEB16	188	MF4637	<250 mg/day	No	Yes	<250 mg/day	No	Yes	Yes	Yes	Yes
Screening	03_011	21DEC15	17:30:00	ALT	ALT	Liver Function Tests	39	IU/L	17	63		39	IU/L	17	63		Normal				N		Screening			28	Normal		03	Entered	55	Male	11FEB16	188	MF4637	<250 mg/day	No	Yes	<250 mg/day	No	Yes	Yes	Yes	Yes
Screening	03_011	21DEC15	17:30:00	AST	AST	Liver Function Tests	27	IU/L	15	41		27	IU/L	15	41		Normal				N		Screening			21	Normal		03	Entered	55	Male	11FEB16	188	MF4637	<250 mg/day	No	Yes	<250 mg/day	No	Yes	Yes	Yes	Yes
Screening	03_011	21DEC15	17:30:00	BILIT	Bilirubin Total	Liver Function Tests	0.5	mg/dL	0.3	1.2		0.5	mg/dL	0.3	1.2		Normal				N		Screening			0.5	Normal		03	Entered	55	Male	11FEB16	188	MF4637	<250 mg/day	No	Yes	<250 mg/day	No	Yes	Yes	Yes	Yes
Screening	03_011	21DEC15	17:30:00	GGT	GGT	Liver Function Tests	82	IU/L	7	50		82	IU/L	7	50		High				N		Screening			77	High		03	Entered	55	Male	11FEB16	188	MF4637	<250 mg/day	No	Yes	<250 mg/day	No	Yes	Yes	Yes	Yes
Screening	03_011	21DEC15	17:30:00	HBA1C	HbA1c	HbA1c	5.4	%	4	5.6		5.4	%	4	5.6		Normal				N	INTERPRETIVE INFORMATION: Hemoglobin A1cHemoglobin A1c values of 5.7-6.4 percent indicate an increasedrisk for developing diabetes mellitus. Hemoglobin A1c valuesgreater than or equal to 6.5 percent are diagnostic of diabetesmellitus. Diagnosis should be confirmed by repeating the Hb A1ctest.This boronate affinity Hb A1c method provides accurate analyticalresults in the presence of nearly all hem…	Screening			5.4	Normal		03	Entered	55	Male	11FEB16	188	MF4637	<250 mg/day	No	Yes	<250 mg/day	No	Yes	Yes	Yes	Yes
Screening	03_011	21DEC15	17:30:00	HCAB	Hepatitis C Antibody	Hepatitis C Antibody	NONREACT				NONREACT					NONREACT					N		Screening						03	Entered	55	Male	11FEB16	188	MF4637	<250 mg/day	No	Yes	<250 mg/day	No	Yes	Yes	Yes	Yes
Screening	03_011	21DEC15	17:30:00	TSH	TSH	TSH	1.94	uIU/mL	0.34	5.6		1.94	uIU/mL	0.34	5.6		Normal				N		Screening			1.94	Normal		03	Entered	55	Male	11FEB16	188	MF4637	<250 mg/day	No	Yes	<250 mg/day	No	Yes	Yes	Yes	Yes
Baseline	03_011	10FEB16	7:45:00	ALB	Albumin	Chemistry	4.7	g/dL	3.5	5.2		4.7	g/dL	3.5	5.2		Normal				Y		Baseline			4.7	Normal		03	Entered	55	Male	11FEB16	188	MF4637	<250 mg/day	No	Yes	<250 mg/day	No	Yes	Yes	Yes	Yes
Baseline	03_011	10FEB16	7:45:00	ALP	Alkaline Phosphatase	Liver Function Tests	72	IU/L	32	92		72	IU/L	32	92		Normal				Y		Baseline			72	Normal		03	Entered	55	Male	11FEB16	188	MF4637	<250 mg/day	No	Yes	<250 mg/day	No	Yes	Yes	Yes	Yes
Baseline	03_011	10FEB16	7:45:00	ALT	ALT	Liver Function Tests	28	IU/L	17	63		28	IU/L	17	63		Normal				Y		Baseline			28	Normal		03	Entered	55	Male	11FEB16	188	MF4637	<250 mg/day	No	Yes	<250 mg/day	No	Yes	Yes	Yes	Yes
Baseline	03_011	10FEB16	7:45:00	AST	AST	Liver Function Tests	21	IU/L	15	41		21	IU/L	15	41		Normal				Y		Baseline			21	Normal		03	Entered	55	Male	11FEB16	188	MF4637	<250 mg/day	No	Yes	<250 mg/day	No	Yes	Yes	Yes	Yes
Baseline	03_011	10FEB16	7:45:00	BASO	Abs Basophils	Hematology	0.0	K/uL	0	0.2		0	K/uL	0	0.2		Normal				Y		Baseline			0	Normal		03	Entered	55	Male	11FEB16	188	MF4637	<250 mg/day	No	Yes	<250 mg/day	No	Yes	Yes	Yes	Yes
Baseline	03_011	10FEB16	7:45:00	BASOLE	Basophils	Hematology	0	%	0	2		0	%	0	2		Normal				Y		Baseline			0	Normal		03	Entered	55	Male	11FEB16	188	MF4637	<250 mg/day	No	Yes	<250 mg/day	No	Yes	Yes	Yes	Yes
Baseline	03_011	10FEB16	7:45:00	BICARB	BiCarbonate (CO2)	Chemistry	27	mmol/L	22	32		27	mmol/L	22	32		Normal				Y		Baseline			27	Normal		03	Entered	55	Male	11FEB16	188	MF4637	<250 mg/day	No	Yes	<250 mg/day	No	Yes	Yes	Yes	Yes
Baseline	03_011	10FEB16	7:45:00	BILIT	Bilirubin Total	Liver Function Tests	0.5	mg/dL	0.3	1.2		0.5	mg/dL	0.3	1.2		Normal				Y		Baseline			0.5	Normal		03	Entered	55	Male	11FEB16	188	MF4637	<250 mg/day	No	Yes	<250 mg/day	No	Yes	Yes	Yes	Yes
Baseline	03_011	10FEB16	7:45:00	BUN	BUN (urea)	Chemistry	13	mg/dL	6	20		13	mg/dL	6	20		Normal				Y		Baseline			13	Normal		03	Entered	55	Male	11FEB16	188	MF4637	<250 mg/day	No	Yes	<250 mg/day	No	Yes	Yes	Yes	Yes
Baseline	03_011	10FEB16	7:45:00	CA	Calcium	Chemistry	9.6	mg/dL	8.6	10		9.6	mg/dL	8.6	10		Normal				Y		Baseline			9.6	Normal		03	Entered	55	Male	11FEB16	188	MF4637	<250 mg/day	No	Yes	<250 mg/day	No	Yes	Yes	Yes	Yes
Baseline	03_011	10FEB16	7:45:00	CL	Chloride	Chemistry	97	mmol/L	98	107		97	mmol/L	98	107		Low				Y		Baseline			97	Low		03	Entered	55	Male	11FEB16	188	MF4637	<250 mg/day	No	Yes	<250 mg/day	No	Yes	Yes	Yes	Yes
Baseline	03_011	10FEB16	7:45:00	CREAT	Creatinine	Chemistry	1.0	mg/dL	0.9	1.3		1	mg/dL	0.9	1.3		Normal				Y		Baseline			1	Normal		03	Entered	55	Male	11FEB16	188	MF4637	<250 mg/day	No	Yes	<250 mg/day	No	Yes	Yes	Yes	Yes
Baseline	03_011	10FEB16	7:45:00	CRPHS	hs-CRP	hs-CRP	6.49	mg/L				6.49	mg/L				Normal				Y	hs-CRP CHD risk level: low risk <1.0 mg/L intermediate risk 1.0-3.0 mg/L high risk >3.0 mg/L Values >10 mg/L suggests an inflammatory disorder requiring separate evaluation. Cardiac risk assessment is not appropriate in this context.	Baseline			6.49	Normal		03	Entered	55	Male	11FEB16	188	MF4637	<250 mg/day	No	Yes	<250 mg/day	No	Yes	Yes	Yes	Yes
Baseline	03_011	10FEB16	7:45:00	EOS	Abs Eosinophils	Hematology	0.1	K/uL	0	0.6		0.1	K/uL	0	0.6		Normal				Y		Baseline			0.1	Normal		03	Entered	55	Male	11FEB16	188	MF4637	<250 mg/day	No	Yes	<250 mg/day	No	Yes	Yes	Yes	Yes
Baseline	03_011	10FEB16	7:45:00	EOSLE	Eosinophils	Hematology	1	%	0	4		1	%	0	4		Normal				Y		Baseline			1	Normal		03	Entered	55	Male	11FEB16	188	MF4637	<250 mg/day	No	Yes	<250 mg/day	No	Yes	Yes	Yes	Yes
Baseline	03_011	10FEB16	7:45:00	GGT	GGT	Liver Function Tests	77	IU/L	7	50		77	IU/L	7	50		High				Y		Baseline			77	High		03	Entered	55	Male	11FEB16	188	MF4637	<250 mg/day	No	Yes	<250 mg/day	No	Yes	Yes	Yes	Yes
Baseline	03_011	10FEB16	7:45:00	GLUCF	Glucose Fasting	Chemistry	111	mg/dL	70	99		111	mg/dL	70	99		High				Y		Baseline			111	High		03	Entered	55	Male	11FEB16	188	MF4637	<250 mg/day	No	Yes	<250 mg/day	No	Yes	Yes	Yes	Yes
Baseline	03_011	10FEB16	7:45:00	HCT	Hematocrit	Hematology	47.0	%	38	53		47	%	38	53		Normal				Y		Baseline			47	Normal		03	Entered	55	Male	11FEB16	188	MF4637	<250 mg/day	No	Yes	<250 mg/day	No	Yes	Yes	Yes	Yes
Baseline	03_011	10FEB16	7:45:00	HGB	Hemoglobin	Hematology	15.5	g/dL	13.5	17.5		15.5	g/dL	13.5	17.5		Normal				Y		Baseline			15.5	Normal		03	Entered	55	Male	11FEB16	188	MF4637	<250 mg/day	No	Yes	<250 mg/day	No	Yes	Yes	Yes	Yes
Baseline	03_011	10FEB16	7:45:00	INSULIN	Insulin	Insulin	14.0	uIU/mL	1.9	23		14	uIU/mL	1.9	23		Normal				Y		Baseline			14	Normal		03	Entered	55	Male	11FEB16	188	MF4637	<250 mg/day	No	Yes	<250 mg/day	No	Yes	Yes	Yes	Yes
Baseline	03_011	10FEB16	7:45:00	K	Potassium	Chemistry	4.1	mmol/L	3.5	5.1		4.1	mmol/L	3.5	5.1		Normal				Y		Baseline			4.1	Normal		03	Entered	55	Male	11FEB16	188	MF4637	<250 mg/day	No	Yes	<250 mg/day	No	Yes	Yes	Yes	Yes
Baseline	03_011	10FEB16	7:45:00	LYM	Abs Lymphocytes	Hematology	1.6	K/uL	0.8	4		1.6	K/uL	0.8	4		Normal				Y		Baseline			1.6	Normal		03	Entered	55	Male	11FEB16	188	MF4637	<250 mg/day	No	Yes	<250 mg/day	No	Yes	Yes	Yes	Yes
Baseline	03_011	10FEB16	7:45:00	LYMLE	Lymphocytes	Hematology	24	%	20	50		24	%	20	50		Normal				Y		Baseline			24	Normal		03	Entered	55	Male	11FEB16	188	MF4637	<250 mg/day	No	Yes	<250 mg/day	No	Yes	Yes	Yes	Yes
Baseline	03_011	10FEB16	7:45:00	MONO	Abs Monocytes	Hematology	0.5	K/uL	0	0.9		0.5	K/uL	0	0.9		Normal				Y		Baseline			0.5	Normal		03	Entered	55	Male	11FEB16	188	MF4637	<250 mg/day	No	Yes	<250 mg/day	No	Yes	Yes	Yes	Yes
Baseline	03_011	10FEB16	7:45:00	MONOLE	Monocytes	Hematology	8	%	1	9		8	%	1	9		Normal				Y		Baseline			8	Normal		03	Entered	55	Male	11FEB16	188	MF4637	<250 mg/day	No	Yes	<250 mg/day	No	Yes	Yes	Yes	Yes
Baseline	03_011	10FEB16	7:45:00	NEUT	Abs Neutrophil	Hematology	4.4	K/uL	1.5	7.7		4.4	K/uL	1.5	7.7		Normal				Y		Baseline			4.4	Normal		03	Entered	55	Male	11FEB16	188	MF4637	<250 mg/day	No	Yes	<250 mg/day	No	Yes	Yes	Yes	Yes
Baseline	03_011	10FEB16	7:45:00	NEUTLE	Neutrophils	Hematology	67	%	45	79		67	%	45	79		Normal				Y		Baseline			67	Normal		03	Entered	55	Male	11FEB16	188	MF4637	<250 mg/day	No	Yes	<250 mg/day	No	Yes	Yes	Yes	Yes
Baseline	03_011	10FEB16	7:45:00	PLAT	Platelet Count	Hematology	201	K/uL	150	450		201	K/uL	150	450		Normal				Y		Baseline			201	Normal		03	Entered	55	Male	11FEB16	188	MF4637	<250 mg/day	No	Yes	<250 mg/day	No	Yes	Yes	Yes	Yes
Baseline	03_011	10FEB16	7:45:00	RBC	RBC	Hematology	4.83	M/uL	4.3	5.8		4.83	M/uL	4.3	5.8		Normal				Y		Baseline			4.83	Normal		03	Entered	55	Male	11FEB16	188	MF4637	<250 mg/day	No	Yes	<250 mg/day	No	Yes	Yes	Yes	Yes
Baseline	03_011	10FEB16	7:45:00	SODIUM	Sodium	Chemistry	135	mmol/L	136	145		135	mmol/L	136	145		Low				Y		Baseline			135	Low		03	Entered	55	Male	11FEB16	188	MF4637	<250 mg/day	No	Yes	<250 mg/day	No	Yes	Yes	Yes	Yes
Baseline	03_011	10FEB16	7:45:00	TRIG	Triglycerides	Chemistry	77	mg/dL		150		77	mg/dL		150		Normal				Y		Baseline			77	Normal		03	Entered	55	Male	11FEB16	188	MF4637	<250 mg/day	No	Yes	<250 mg/day	No	Yes	Yes	Yes	Yes
Baseline	03_011	10FEB16	7:45:00	WBC	WBC	Hematology	6.5	K/uL	4	11		6.5	K/uL	4	11		Normal				Y		Baseline			6.5	Normal		03	Entered	55	Male	11FEB16	188	MF4637	<250 mg/day	No	Yes	<250 mg/day	No	Yes	Yes	Yes	Yes
Week 12	03_011	17MAY16	9:00:00	ALP	Alkaline Phosphatase	Liver Function Tests	73	IU/L	32	92		73	IU/L	32	92		Normal				N		Week 12			72	Normal	1	03	Entered	55	Male	11FEB16	188	MF4637	<250 mg/day	No	Yes	<250 mg/day	No	Yes	Yes	Yes	Yes
Week 12	03_011	17MAY16	9:00:00	ALT	ALT	Liver Function Tests	50	IU/L	17	63		50	IU/L	17	63		Normal				N		Week 12			28	Normal	22	03	Entered	55	Male	11FEB16	188	MF4637	<250 mg/day	No	Yes	<250 mg/day	No	Yes	Yes	Yes	Yes
Week 12	03_011	17MAY16	9:00:00	AST	AST	Liver Function Tests	36	IU/L	15	41		36	IU/L	15	41		Normal				N		Week 12			21	Normal	15	03	Entered	55	Male	11FEB16	188	MF4637	<250 mg/day	No	Yes	<250 mg/day	No	Yes	Yes	Yes	Yes
Week 12	03_011	17MAY16	9:00:00	BASO	Abs Basophils	Hematology	0.1	K/uL	0	0.2		0.1	K/uL	0	0.2		Normal				N		Week 12			0	Normal	0.1	03	Entered	55	Male	11FEB16	188	MF4637	<250 mg/day	No	Yes	<250 mg/day	No	Yes	Yes	Yes	Yes
Week 12	03_011	17MAY16	9:00:00	BASOLE	Basophils	Hematology	1	%	0	2		1	%	0	2		Normal				N		Week 12			0	Normal	1	03	Entered	55	Male	11FEB16	188	MF4637	<250 mg/day	No	Yes	<250 mg/day	No	Yes	Yes	Yes	Yes
Week 12	03_011	17MAY16	9:00:00	BILIT	Bilirubin Total	Liver Function Tests	0.5	mg/dL	0.3	1.2		0.5	mg/dL	0.3	1.2		Normal				N		Week 12			0.5	Normal	0	03	Entered	55	Male	11FEB16	188	MF4637	<250 mg/day	No	Yes	<250 mg/day	No	Yes	Yes	Yes	Yes
Week 12	03_011	17MAY16	9:00:00	EOS	Abs Eosinophils	Hematology	0.1	K/uL	0	0.6		0.1	K/uL	0	0.6		Normal				N		Week 12			0.1	Normal	0	03	Entered	55	Male	11FEB16	188	MF4637	<250 mg/day	No	Yes	<250 mg/day	No	Yes	Yes	Yes	Yes
Week 12	03_011	17MAY16	9:00:00	EOSLE	Eosinophils	Hematology	2	%	0	4		2	%	0	4		Normal				N		Week 12			1	Normal	1	03	Entered	55	Male	11FEB16	188	MF4637	<250 mg/day	No	Yes	<250 mg/day	No	Yes	Yes	Yes	Yes
Week 12	03_011	17MAY16	9:00:00	GGT	GGT	Liver Function Tests	149	IU/L	7	50		149	IU/L	7	50		High				N		Week 12			77	High	72	03	Entered	55	Male	11FEB16	188	MF4637	<250 mg/day	No	Yes	<250 mg/day	No	Yes	Yes	Yes	Yes
Week 12	03_011	17MAY16	9:00:00	HCT	Hematocrit	Hematology	48.3	%	38	53		48.3	%	38	53		Normal				N		Week 12			47	Normal	1.3	03	Entered	55	Male	11FEB16	188	MF4637	<250 mg/day	No	Yes	<250 mg/day	No	Yes	Yes	Yes	Yes
Week 12	03_011	17MAY16	9:00:00	HGB	Hemoglobin	Hematology	16.0	g/dL	13.5	17.5		16	g/dL	13.5	17.5		Normal				N		Week 12			15.5	Normal	0.5	03	Entered	55	Male	11FEB16	188	MF4637	<250 mg/day	No	Yes	<250 mg/day	No	Yes	Yes	Yes	Yes
Week 12	03_011	17MAY16	9:00:00	LYM	Abs Lymphocytes	Hematology	1.8	K/uL	0.8	4		1.8	K/uL	0.8	4		Normal				N		Week 12			1.6	Normal	0.2	03	Entered	55	Male	11FEB16	188	MF4637	<250 mg/day	No	Yes	<250 mg/day	No	Yes	Yes	Yes	Yes
Week 12	03_011	17MAY16	9:00:00	LYMLE	Lymphocytes	Hematology	36	%	20	50		36	%	20	50		Normal				N		Week 12			24	Normal	12	03	Entered	55	Male	11FEB16	188	MF4637	<250 mg/day	No	Yes	<250 mg/day	No	Yes	Yes	Yes	Yes
Week 12	03_011	17MAY16	9:00:00	MONO	Abs Monocytes	Hematology	0.5	K/uL	0	0.9		0.5	K/uL	0	0.9		Normal				N		Week 12			0.5	Normal	0	03	Entered	55	Male	11FEB16	188	MF4637	<250 mg/day	No	Yes	<250 mg/day	No	Yes	Yes	Yes	Yes
Week 12	03_011	17MAY16	9:00:00	MONOLE	Monocytes	Hematology	9	%	1	9		9	%	1	9		Normal				N		Week 12			8	Normal	1	03	Entered	55	Male	11FEB16	188	MF4637	<250 mg/day	No	Yes	<250 mg/day	No	Yes	Yes	Yes	Yes
Week 12	03_011	17MAY16	9:00:00	NEUT	Abs Neutrophil	Hematology	2.6	K/uL	1.5	7.7		2.6	K/uL	1.5	7.7		Normal				N		Week 12			4.4	Normal	-1.8	03	Entered	55	Male	11FEB16	188	MF4637	<250 mg/day	No	Yes	<250 mg/day	No	Yes	Yes	Yes	Yes
Week 12	03_011	17MAY16	9:00:00	NEUTLE	Neutrophils	Hematology	51	%	45	79		51	%	45	79		Normal				N		Week 12			67	Normal	-16	03	Entered	55	Male	11FEB16	188	MF4637	<250 mg/day	No	Yes	<250 mg/day	No	Yes	Yes	Yes	Yes
Week 12	03_011	17MAY16	9:00:00	PLAT	Platelet Count	Hematology	234	K/uL	150	450		234	K/uL	150	450		Normal				N		Week 12			201	Normal	33	03	Entered	55	Male	11FEB16	188	MF4637	<250 mg/day	No	Yes	<250 mg/day	No	Yes	Yes	Yes	Yes
Week 12	03_011	17MAY16	9:00:00	RBC	RBC	Hematology	5.04	M/uL	4.3	5.8		5.04	M/uL	4.3	5.8		Normal				N		Week 12			4.83	Normal	0.21	03	Entered	55	Male	11FEB16	188	MF4637	<250 mg/day	No	Yes	<250 mg/day	No	Yes	Yes	Yes	Yes
Week 12	03_011	17MAY16	9:00:00	WBC	WBC	Hematology	5.0	K/uL	4	11		5	K/uL	4	11		Normal				N		Week 12			6.5	Normal	-1.5	03	Entered	55	Male	11FEB16	188	MF4637	<250 mg/day	No	Yes	<250 mg/day	No	Yes	Yes	Yes	Yes
Week 24	03_011	01AUG16	15:45:00	ALB	Albumin	Chemistry	4.9	g/dL	3.5	5.2		4.9	g/dL	3.5	5.2		Normal				Y		Week 24			4.7	Normal	0.2	03	Entered	55	Male	11FEB16	188	MF4637	<250 mg/day	No	Yes	<250 mg/day	No	Yes	Yes	Yes	Yes
Week 24	03_011	01AUG16	15:45:00	ALP	Alkaline Phosphatase	Liver Function Tests	66	IU/L	32	92		66	IU/L	32	92		Normal				Y		Week 24			72	Normal	-6	03	Entered	55	Male	11FEB16	188	MF4637	<250 mg/day	No	Yes	<250 mg/day	No	Yes	Yes	Yes	Yes
Week 24	03_011	01AUG16	15:45:00	ALT	ALT	Liver Function Tests	37	IU/L	17	63		37	IU/L	17	63		Normal				Y		Week 24			28	Normal	9	03	Entered	55	Male	11FEB16	188	MF4637	<250 mg/day	No	Yes	<250 mg/day	No	Yes	Yes	Yes	Yes
Week 24	03_011	01AUG16	15:45:00	AST	AST	Liver Function Tests	29	IU/L	15	41		29	IU/L	15	41		Normal				Y		Week 24			21	Normal	8	03	Entered	55	Male	11FEB16	188	MF4637	<250 mg/day	No	Yes	<250 mg/day	No	Yes	Yes	Yes	Yes
Week 24	03_011	01AUG16	15:45:00	BASO	Abs Basophils	Hematology	0.1	K/uL	0	0.2		0.1	K/uL	0	0.2		Normal				Y		Week 24			0	Normal	0.1	03	Entered	55	Male	11FEB16	188	MF4637	<250 mg/day	No	Yes	<250 mg/day	No	Yes	Yes	Yes	Yes
Week 24	03_011	01AUG16	15:45:00	BASOLE	Basophils	Hematology	1	%	0	2		1	%	0	2		Normal				Y		Week 24			0	Normal	1	03	Entered	55	Male	11FEB16	188	MF4637	<250 mg/day	No	Yes	<250 mg/day	No	Yes	Yes	Yes	Yes
Week 24	03_011	01AUG16	15:45:00	BICARB	BiCarbonate (CO2)	Chemistry	23	mmol/L	22	32		23	mmol/L	22	32		Normal				Y		Week 24			27	Normal	-4	03	Entered	55	Male	11FEB16	188	MF4637	<250 mg/day	No	Yes	<250 mg/day	No	Yes	Yes	Yes	Yes
Week 24	03_011	01AUG16	15:45:00	BILIT	Bilirubin Total	Liver Function Tests	0.5	mg/dL	0.3	1.2		0.5	mg/dL	0.3	1.2		Normal				Y		Week 24			0.5	Normal	0	03	Entered	55	Male	11FEB16	188	MF4637	<250 mg/day	No	Yes	<250 mg/day	No	Yes	Yes	Yes	Yes
Week 24	03_011	01AUG16	15:45:00	BUN	BUN (urea)	Chemistry	11	mg/dL	6	20		11	mg/dL	6	20		Normal				Y		Week 24			13	Normal	-2	03	Entered	55	Male	11FEB16	188	MF4637	<250 mg/day	No	Yes	<250 mg/day	No	Yes	Yes	Yes	Yes
Week 24	03_011	01AUG16	15:45:00	CA	Calcium	Chemistry	9.7	mg/dL	8.6	10		9.7	mg/dL	8.6	10		Normal				Y		Week 24			9.6	Normal	0.1	03	Entered	55	Male	11FEB16	188	MF4637	<250 mg/day	No	Yes	<250 mg/day	No	Yes	Yes	Yes	Yes
Week 24	03_011	01AUG16	15:45:00	CL	Chloride	Chemistry	97	mmol/L	98	107		97	mmol/L	98	107		Low				Y		Week 24			97	Low	0	03	Entered	55	Male	11FEB16	188	MF4637	<250 mg/day	No	Yes	<250 mg/day	No	Yes	Yes	Yes	Yes
Week 24	03_011	01AUG16	15:45:00	CREAT	Creatinine	Chemistry	0.8	mg/dL	0.9	1.3		0.8	mg/dL	0.9	1.3		Low				Y		Week 24			1	Normal	-0.2	03	Entered	55	Male	11FEB16	188	MF4637	<250 mg/day	No	Yes	<250 mg/day	No	Yes	Yes	Yes	Yes
Week 24	03_011	01AUG16	15:45:00	CRPHS	hs-CRP	hs-CRP	1.20	mg/L				1.2	mg/L				Normal				Y	hs-CRP CHD risk level: low risk <1.0 mg/L intermediate risk 1.0-3.0 mg/L high risk >3.0 mg/L Values >10 mg/L suggests an inflammatory disorder requiring separate evaluation. Cardiac risk assessment is not appropriate in this context.	Week 24			6.49	Normal	-5.29	03	Entered	55	Male	11FEB16	188	MF4637	<250 mg/day	No	Yes	<250 mg/day	No	Yes	Yes	Yes	Yes
Week 24	03_011	01AUG16	15:45:00	EOS	Abs Eosinophils	Hematology	0.1	K/uL	0	0.6		0.1	K/uL	0	0.6		Normal				Y		Week 24			0.1	Normal	0	03	Entered	55	Male	11FEB16	188	MF4637	<250 mg/day	No	Yes	<250 mg/day	No	Yes	Yes	Yes	Yes
Week 24	03_011	01AUG16	15:45:00	EOSLE	Eosinophils	Hematology	2	%	0	4		2	%	0	4		Normal				Y		Week 24			1	Normal	1	03	Entered	55	Male	11FEB16	188	MF4637	<250 mg/day	No	Yes	<250 mg/day	No	Yes	Yes	Yes	Yes
Week 24	03_011	01AUG16	15:45:00	GGT	GGT	Liver Function Tests	99	IU/L	7	50		99	IU/L	7	50		High				Y		Week 24			77	High	22	03	Entered	55	Male	11FEB16	188	MF4637	<250 mg/day	No	Yes	<250 mg/day	No	Yes	Yes	Yes	Yes
Week 24	03_011	01AUG16	15:45:00	GLUCF	Glucose Fasting	Chemistry	100	mg/dL	70	99		100	mg/dL	70	99		High				Y		Week 24			111	High	-11	03	Entered	55	Male	11FEB16	188	MF4637	<250 mg/day	No	Yes	<250 mg/day	No	Yes	Yes	Yes	Yes
Week 24	03_011	01AUG16	15:45:00	HBA1C	HbA1c	HbA1c	5.7	%	4	5.6		5.7	%	4	5.6		High				Y	INTERPRETIVE INFORMATION: Hemoglobin A1cHemoglobin A1c values of 5.7-6.4 percent indicate an increasedrisk for developing diabetes mellitus. Hemoglobin A1c valuesgreater than or equal to 6.5 percent are diagnostic of diabetesmellitus. Diagnosis should be confirmed by repeating the Hb A1ctest.This boronate affinity Hb A1c method provides accurate analyticalresults in the presence of nearly all hem…	Week 24			5.4	Normal	0.3	03	Entered	55	Male	11FEB16	188	MF4637	<250 mg/day	No	Yes	<250 mg/day	No	Yes	Yes	Yes	Yes
Week 24	03_011	01AUG16	15:45:00	HCT	Hematocrit	Hematology	46.3	%	38	53		46.3	%	38	53		Normal				Y		Week 24			47	Normal	-0.7	03	Entered	55	Male	11FEB16	188	MF4637	<250 mg/day	No	Yes	<250 mg/day	No	Yes	Yes	Yes	Yes
Week 24	03_011	01AUG16	15:45:00	HGB	Hemoglobin	Hematology	15.6	g/dL	13.5	17.5		15.6	g/dL	13.5	17.5		Normal				Y		Week 24			15.5	Normal	0.1	03	Entered	55	Male	11FEB16	188	MF4637	<250 mg/day	No	Yes	<250 mg/day	No	Yes	Yes	Yes	Yes
Week 24	03_011	01AUG16	15:45:00	INSULIN	Insulin	Insulin	9.8	uIU/mL	1.9	23		9.8	uIU/mL	1.9	23		Normal				Y		Week 24			14	Normal	-4.2	03	Entered	55	Male	11FEB16	188	MF4637	<250 mg/day	No	Yes	<250 mg/day	No	Yes	Yes	Yes	Yes
Week 24	03_011	01AUG16	15:45:00	K	Potassium	Chemistry	3.6	mmol/L	3.5	5.1		3.6	mmol/L	3.5	5.1		Normal				Y		Week 24			4.1	Normal	-0.5	03	Entered	55	Male	11FEB16	188	MF4637	<250 mg/day	No	Yes	<250 mg/day	No	Yes	Yes	Yes	Yes
Week 24	03_011	01AUG16	15:45:00	LYM	Abs Lymphocytes	Hematology	1.5	K/uL	0.8	4		1.5	K/uL	0.8	4		Normal				Y		Week 24			1.6	Normal	-0.1	03	Entered	55	Male	11FEB16	188	MF4637	<250 mg/day	No	Yes	<250 mg/day	No	Yes	Yes	Yes	Yes
Week 24	03_011	01AUG16	15:45:00	LYMLE	Lymphocytes	Hematology	23	%	20	50		23	%	20	50		Normal				Y		Week 24			24	Normal	-1	03	Entered	55	Male	11FEB16	188	MF4637	<250 mg/day	No	Yes	<250 mg/day	No	Yes	Yes	Yes	Yes
Week 24	03_011	01AUG16	15:45:00	MONO	Abs Monocytes	Hematology	0.6	K/uL	0	0.9		0.6	K/uL	0	0.9		Normal				Y		Week 24			0.5	Normal	0.1	03	Entered	55	Male	11FEB16	188	MF4637	<250 mg/day	No	Yes	<250 mg/day	No	Yes	Yes	Yes	Yes
Week 24	03_011	01AUG16	15:45:00	MONOLE	Monocytes	Hematology	10	%	1	9		10	%	1	9		High				Y		Week 24			8	Normal	2	03	Entered	55	Male	11FEB16	188	MF4637	<250 mg/day	No	Yes	<250 mg/day	No	Yes	Yes	Yes	Yes
Week 24	03_011	01AUG16	15:45:00	NEUT	Abs Neutrophil	Hematology	4.1	K/uL	1.5	7.7		4.1	K/uL	1.5	7.7		Normal				Y		Week 24			4.4	Normal	-0.3	03	Entered	55	Male	11FEB16	188	MF4637	<250 mg/day	No	Yes	<250 mg/day	No	Yes	Yes	Yes	Yes
Week 24	03_011	01AUG16	15:45:00	NEUTLE	Neutrophils	Hematology	64	%	45	79		64	%	45	79		Normal				Y		Week 24			67	Normal	-3	03	Entered	55	Male	11FEB16	188	MF4637	<250 mg/day	No	Yes	<250 mg/day	No	Yes	Yes	Yes	Yes
Week 24	03_011	01AUG16	15:45:00	PLAT	Platelet Count	Hematology	212	K/uL	150	450		212	K/uL	150	450		Normal				Y		Week 24			201	Normal	11	03	Entered	55	Male	11FEB16	188	MF4637	<250 mg/day	No	Yes	<250 mg/day	No	Yes	Yes	Yes	Yes
Week 24	03_011	01AUG16	15:45:00	RBC	RBC	Hematology	4.79	M/uL	4.3	5.8		4.79	M/uL	4.3	5.8		Normal				Y		Week 24			4.83	Normal	-0.04	03	Entered	55	Male	11FEB16	188	MF4637	<250 mg/day	No	Yes	<250 mg/day	No	Yes	Yes	Yes	Yes
Week 24	03_011	01AUG16	15:45:00	SODIUM	Sodium	Chemistry	136	mmol/L	136	145		136	mmol/L	136	145		Normal				Y		Week 24			135	Low	1	03	Entered	55	Male	11FEB16	188	MF4637	<250 mg/day	No	Yes	<250 mg/day	No	Yes	Yes	Yes	Yes
Week 24	03_011	01AUG16	15:45:00	TRIG	Triglycerides	Chemistry	87	mg/dL		150		87	mg/dL		150		Normal				Y		Week 24			77	Normal	10	03	Entered	55	Male	11FEB16	188	MF4637	<250 mg/day	No	Yes	<250 mg/day	No	Yes	Yes	Yes	Yes
Week 24	03_011	01AUG16	15:45:00	TSH	TSH	TSH	2.29	uIU/mL	0.34	5.6		2.29	uIU/mL	0.34	5.6		Normal				Y		Week 24			1.94	Normal	0.35	03	Entered	55	Male	11FEB16	188	MF4637	<250 mg/day	No	Yes	<250 mg/day	No	Yes	Yes	Yes	Yes
Week 24	03_011	01AUG16	15:45:00	WBC	WBC	Hematology	6.4	K/uL	4	11		6.4	K/uL	4	11		Normal				Y		Week 24			6.5	Normal	-0.1	03	Entered	55	Male	11FEB16	188	MF4637	<250 mg/day	No	Yes	<250 mg/day	No	Yes	Yes	Yes	Yes
Screening	03_012	27JAN16	9:30:00	ALP	Alkaline Phosphatase	Liver Function Tests	45	IU/L	32	92		45	IU/L	32	92		Normal				N		Screening			52	Normal		03	Entered	63	Male	12FEB16	190	MF4637	<250 mg/day	No	Yes	<250 mg/day	No	Yes	Yes	Yes	Yes
Screening	03_012	27JAN16	9:30:00	ALT	ALT	Liver Function Tests	48	IU/L	17	63		48	IU/L	17	63		Normal				N		Screening			54	Normal		03	Entered	63	Male	12FEB16	190	MF4637	<250 mg/day	No	Yes	<250 mg/day	No	Yes	Yes	Yes	Yes
Screening	03_012	27JAN16	9:30:00	AST	AST	Liver Function Tests	28	IU/L	15	41		28	IU/L	15	41		Normal				N		Screening			32	Normal		03	Entered	63	Male	12FEB16	190	MF4637	<250 mg/day	No	Yes	<250 mg/day	No	Yes	Yes	Yes	Yes
Screening	03_012	27JAN16	9:30:00	BILIT	Bilirubin Total	Liver Function Tests	0.4	mg/dL	0.2	1.1		0.4	mg/dL	0.2	1.1		Normal				N		Screening			0.5	Normal		03	Entered	63	Male	12FEB16	190	MF4637	<250 mg/day	No	Yes	<250 mg/day	No	Yes	Yes	Yes	Yes
Screening	03_012	27JAN16	9:30:00	GGT	GGT	Liver Function Tests	57	IU/L	7	50		57	IU/L	7	50		High				N		Screening			57	High		03	Entered	63	Male	12FEB16	190	MF4637	<250 mg/day	No	Yes	<250 mg/day	No	Yes	Yes	Yes	Yes
Screening	03_012	27JAN16	9:30:00	HBA1C	HbA1c	HbA1c	5.6	%	4	5.6		5.6	%	4	5.6		Normal				N	INTERPRETIVE INFORMATION: Hemoglobin A1cHemoglobin A1c values of 5.7-6.4 percent indicate an increasedrisk for developing diabetes mellitus. Hemoglobin A1c valuesgreater than or equal to 6.5 percent are diagnostic of diabetesmellitus. Diagnosis should be confirmed by repeating the Hb A1ctest.This boronate affinity Hb A1c method provides accurate analyticalresults in the presence of nearly all hem…	Screening			5.6	Normal		03	Entered	63	Male	12FEB16	190	MF4637	<250 mg/day	No	Yes	<250 mg/day	No	Yes	Yes	Yes	Yes
Screening	03_012	27JAN16	9:30:00	HCAB	Hepatitis C Antibody	Hepatitis C Antibody	NONREACT				NONREACT					NONREACT					N		Screening						03	Entered	63	Male	12FEB16	190	MF4637	<250 mg/day	No	Yes	<250 mg/day	No	Yes	Yes	Yes	Yes
Screening	03_012	27JAN16	9:30:00	TSH	TSH	TSH	1.73	uIU/mL	0.34	5.6		1.73	uIU/mL	0.34	5.6		Normal				N		Screening			1.73	Normal		03	Entered	63	Male	12FEB16	190	MF4637	<250 mg/day	No	Yes	<250 mg/day	No	Yes	Yes	Yes	Yes
Baseline	03_012	11FEB16	11:00:00	ALB	Albumin	Chemistry	4.8	g/dL	3.2	4.6		4.8	g/dL	3.2	4.6		High				Y		Baseline			4.8	High		03	Entered	63	Male	12FEB16	190	MF4637	<250 mg/day	No	Yes	<250 mg/day	No	Yes	Yes	Yes	Yes
Baseline	03_012	11FEB16	11:00:00	ALP	Alkaline Phosphatase	Liver Function Tests	52	IU/L	32	92		52	IU/L	32	92		Normal				Y		Baseline			52	Normal		03	Entered	63	Male	12FEB16	190	MF4637	<250 mg/day	No	Yes	<250 mg/day	No	Yes	Yes	Yes	Yes
Baseline	03_012	11FEB16	11:00:00	ALT	ALT	Liver Function Tests	54	IU/L	17	63		54	IU/L	17	63		Normal				Y		Baseline			54	Normal		03	Entered	63	Male	12FEB16	190	MF4637	<250 mg/day	No	Yes	<250 mg/day	No	Yes	Yes	Yes	Yes
Baseline	03_012	11FEB16	11:00:00	AST	AST	Liver Function Tests	32	IU/L	15	41		32	IU/L	15	41		Normal				Y		Baseline			32	Normal		03	Entered	63	Male	12FEB16	190	MF4637	<250 mg/day	No	Yes	<250 mg/day	No	Yes	Yes	Yes	Yes
Baseline	03_012	11FEB16	11:00:00	BASO	Abs Basophils	Hematology	0.1	K/uL	0	0.2		0.1	K/uL	0	0.2		Normal				Y		Baseline			0.1	Normal		03	Entered	63	Male	12FEB16	190	MF4637	<250 mg/day	No	Yes	<250 mg/day	No	Yes	Yes	Yes	Yes
Baseline	03_012	11FEB16	11:00:00	BASOLE	Basophils	Hematology	1	%	0	2		1	%	0	2		Normal				Y		Baseline			1	Normal		03	Entered	63	Male	12FEB16	190	MF4637	<250 mg/day	No	Yes	<250 mg/day	No	Yes	Yes	Yes	Yes
Baseline	03_012	11FEB16	11:00:00	BICARB	BiCarbonate (CO2)	Chemistry	24	mmol/L	22	32		24	mmol/L	22	32		Normal				Y		Baseline			24	Normal		03	Entered	63	Male	12FEB16	190	MF4637	<250 mg/day	No	Yes	<250 mg/day	No	Yes	Yes	Yes	Yes
Baseline	03_012	11FEB16	11:00:00	BILIT	Bilirubin Total	Liver Function Tests	0.5	mg/dL	0.2	1.1		0.5	mg/dL	0.2	1.1		Normal				Y		Baseline			0.5	Normal		03	Entered	63	Male	12FEB16	190	MF4637	<250 mg/day	No	Yes	<250 mg/day	No	Yes	Yes	Yes	Yes
Baseline	03_012	11FEB16	11:00:00	BUN	BUN (urea)	Chemistry	17	mg/dL	8	23		17	mg/dL	8	23		Normal				Y		Baseline			17	Normal		03	Entered	63	Male	12FEB16	190	MF4637	<250 mg/day	No	Yes	<250 mg/day	No	Yes	Yes	Yes	Yes
Baseline	03_012	11FEB16	11:00:00	CA	Calcium	Chemistry	10.0	mg/dL	8.8	10.2		10	mg/dL	8.8	10.2		Normal				Y		Baseline			10	Normal		03	Entered	63	Male	12FEB16	190	MF4637	<250 mg/day	No	Yes	<250 mg/day	No	Yes	Yes	Yes	Yes
Baseline	03_012	11FEB16	11:00:00	CL	Chloride	Chemistry	101	mmol/L	98	107		101	mmol/L	98	107		Normal				Y		Baseline			101	Normal		03	Entered	63	Male	12FEB16	190	MF4637	<250 mg/day	No	Yes	<250 mg/day	No	Yes	Yes	Yes	Yes
Baseline	03_012	11FEB16	11:00:00	CREAT	Creatinine	Chemistry	1.2	mg/dL	0.8	1.3		1.2	mg/dL	0.8	1.3		Normal				Y		Baseline			1.2	Normal		03	Entered	63	Male	12FEB16	190	MF4637	<250 mg/day	No	Yes	<250 mg/day	No	Yes	Yes	Yes	Yes
Baseline	03_012	11FEB16	11:00:00	CRPHS	hs-CRP	hs-CRP	1.32	mg/L				1.32	mg/L				Normal				Y	hs-CRP CHD risk level: low risk <1.0 mg/L intermediate risk 1.0-3.0 mg/L high risk >3.0 mg/L Values >10 mg/L suggests an inflammatory disorder requiring separate evaluation. Cardiac risk assessment is not appropriate in this context.	Baseline			1.32	Normal		03	Entered	63	Male	12FEB16	190	MF4637	<250 mg/day	No	Yes	<250 mg/day	No	Yes	Yes	Yes	Yes
Baseline	03_012	11FEB16	11:00:00	EOS	Abs Eosinophils	Hematology	0.1	K/uL	0	0.6		0.1	K/uL	0	0.6		Normal				Y		Baseline			0.1	Normal		03	Entered	63	Male	12FEB16	190	MF4637	<250 mg/day	No	Yes	<250 mg/day	No	Yes	Yes	Yes	Yes
Baseline	03_012	11FEB16	11:00:00	EOSLE	Eosinophils	Hematology	2	%	0	4		2	%	0	4		Normal				Y		Baseline			2	Normal		03	Entered	63	Male	12FEB16	190	MF4637	<250 mg/day	No	Yes	<250 mg/day	No	Yes	Yes	Yes	Yes
Baseline	03_012	11FEB16	11:00:00	GGT	GGT	Liver Function Tests	57	IU/L	7	50		57	IU/L	7	50		High				Y		Baseline			57	High		03	Entered	63	Male	12FEB16	190	MF4637	<250 mg/day	No	Yes	<250 mg/day	No	Yes	Yes	Yes	Yes
Baseline	03_012	11FEB16	11:00:00	GLUCF	Glucose Fasting	Chemistry	101	mg/dL	70	99		101	mg/dL	70	99		High				Y		Baseline			101	High		03	Entered	63	Male	12FEB16	190	MF4637	<250 mg/day	No	Yes	<250 mg/day	No	Yes	Yes	Yes	Yes
Baseline	03_012	11FEB16	11:00:00	HCT	Hematocrit	Hematology	46.0	%	38	53		46	%	38	53		Normal				Y		Baseline			46	Normal		03	Entered	63	Male	12FEB16	190	MF4637	<250 mg/day	No	Yes	<250 mg/day	No	Yes	Yes	Yes	Yes
Baseline	03_012	11FEB16	11:00:00	HGB	Hemoglobin	Hematology	14.8	g/dL	13.5	17.5		14.8	g/dL	13.5	17.5		Normal				Y		Baseline			14.8	Normal		03	Entered	63	Male	12FEB16	190	MF4637	<250 mg/day	No	Yes	<250 mg/day	No	Yes	Yes	Yes	Yes
Baseline	03_012	11FEB16	11:00:00	INSULIN	Insulin	Insulin	12.1	uIU/mL	1.9	23		12.1	uIU/mL	1.9	23		Normal				Y		Baseline			12.1	Normal		03	Entered	63	Male	12FEB16	190	MF4637	<250 mg/day	No	Yes	<250 mg/day	No	Yes	Yes	Yes	Yes
Baseline	03_012	11FEB16	11:00:00	K	Potassium	Chemistry	5.0	mmol/L	3.5	5.1		5	mmol/L	3.5	5.1		Normal				Y		Baseline			5	Normal		03	Entered	63	Male	12FEB16	190	MF4637	<250 mg/day	No	Yes	<250 mg/day	No	Yes	Yes	Yes	Yes
Baseline	03_012	11FEB16	11:00:00	LYM	Abs Lymphocytes	Hematology	2.3	K/uL	0.8	4		2.3	K/uL	0.8	4		Normal				Y		Baseline			2.3	Normal		03	Entered	63	Male	12FEB16	190	MF4637	<250 mg/day	No	Yes	<250 mg/day	No	Yes	Yes	Yes	Yes
Baseline	03_012	11FEB16	11:00:00	LYMLE	Lymphocytes	Hematology	35	%	20	50		35	%	20	50		Normal				Y		Baseline			35	Normal		03	Entered	63	Male	12FEB16	190	MF4637	<250 mg/day	No	Yes	<250 mg/day	No	Yes	Yes	Yes	Yes
Baseline	03_012	11FEB16	11:00:00	MONO	Abs Monocytes	Hematology	0.6	K/uL	0	0.9		0.6	K/uL	0	0.9		Normal				Y		Baseline			0.6	Normal		03	Entered	63	Male	12FEB16	190	MF4637	<250 mg/day	No	Yes	<250 mg/day	No	Yes	Yes	Yes	Yes
Baseline	03_012	11FEB16	11:00:00	MONOLE	Monocytes	Hematology	9	%	1	9		9	%	1	9		Normal				Y		Baseline			9	Normal		03	Entered	63	Male	12FEB16	190	MF4637	<250 mg/day	No	Yes	<250 mg/day	No	Yes	Yes	Yes	Yes
Baseline	03_012	11FEB16	11:00:00	NEUT	Abs Neutrophil	Hematology	3.4	K/uL	1.5	7.7		3.4	K/uL	1.5	7.7		Normal				Y		Baseline			3.4	Normal		03	Entered	63	Male	12FEB16	190	MF4637	<250 mg/day	No	Yes	<250 mg/day	No	Yes	Yes	Yes	Yes
Baseline	03_012	11FEB16	11:00:00	NEUTLE	Neutrophils	Hematology	53	%	45	79		53	%	45	79		Normal				Y		Baseline			53	Normal		03	Entered	63	Male	12FEB16	190	MF4637	<250 mg/day	No	Yes	<250 mg/day	No	Yes	Yes	Yes	Yes
Baseline	03_012	11FEB16	11:00:00	PLAT	Platelet Count	Hematology	260	K/uL	150	450		260	K/uL	150	450		Normal				Y		Baseline			260	Normal		03	Entered	63	Male	12FEB16	190	MF4637	<250 mg/day	No	Yes	<250 mg/day	No	Yes	Yes	Yes	Yes
Baseline	03_012	11FEB16	11:00:00	RBC	RBC	Hematology	5.05	M/uL	4.3	5.8		5.05	M/uL	4.3	5.8		Normal				Y		Baseline			5.05	Normal		03	Entered	63	Male	12FEB16	190	MF4637	<250 mg/day	No	Yes	<250 mg/day	No	Yes	Yes	Yes	Yes
Baseline	03_012	11FEB16	11:00:00	SODIUM	Sodium	Chemistry	141	mmol/L	136	145		141	mmol/L	136	145		Normal				Y		Baseline			141	Normal		03	Entered	63	Male	12FEB16	190	MF4637	<250 mg/day	No	Yes	<250 mg/day	No	Yes	Yes	Yes	Yes
Baseline	03_012	11FEB16	11:00:00	TRIG	Triglycerides	Chemistry	131	mg/dL		150		131	mg/dL		150		Normal				Y		Baseline			131	Normal		03	Entered	63	Male	12FEB16	190	MF4637	<250 mg/day	No	Yes	<250 mg/day	No	Yes	Yes	Yes	Yes
Baseline	03_012	11FEB16	11:00:00	WBC	WBC	Hematology	6.5	K/uL	4	11		6.5	K/uL	4	11		Normal				Y		Baseline			6.5	Normal		03	Entered	63	Male	12FEB16	190	MF4637	<250 mg/day	No	Yes	<250 mg/day	No	Yes	Yes	Yes	Yes
Week 12	03_012	13MAY16	11:15:00	ALP	Alkaline Phosphatase	Liver Function Tests	51	IU/L	32	92		51	IU/L	32	92		Normal				N		Week 12			52	Normal	-1	03	Entered	63	Male	12FEB16	190	MF4637	<250 mg/day	No	Yes	<250 mg/day	No	Yes	Yes	Yes	Yes
Week 12	03_012	13MAY16	11:15:00	ALT	ALT	Liver Function Tests	53	IU/L	17	63		53	IU/L	17	63		Normal				N		Week 12			54	Normal	-1	03	Entered	63	Male	12FEB16	190	MF4637	<250 mg/day	No	Yes	<250 mg/day	No	Yes	Yes	Yes	Yes
Week 12	03_012	13MAY16	11:15:00	AST	AST	Liver Function Tests	31	IU/L	15	41		31	IU/L	15	41		Normal				N		Week 12			32	Normal	-1	03	Entered	63	Male	12FEB16	190	MF4637	<250 mg/day	No	Yes	<250 mg/day	No	Yes	Yes	Yes	Yes
Week 12	03_012	13MAY16	11:15:00	BASO	Abs Basophils	Hematology	0.1	K/uL	0	0.2		0.1	K/uL	0	0.2		Normal				N		Week 12			0.1	Normal	0	03	Entered	63	Male	12FEB16	190	MF4637	<250 mg/day	No	Yes	<250 mg/day	No	Yes	Yes	Yes	Yes
Week 12	03_012	13MAY16	11:15:00	BASOLE	Basophils	Hematology	1	%	0	2		1	%	0	2		Normal				N		Week 12			1	Normal	0	03	Entered	63	Male	12FEB16	190	MF4637	<250 mg/day	No	Yes	<250 mg/day	No	Yes	Yes	Yes	Yes
Week 12	03_012	13MAY16	11:15:00	BILIT	Bilirubin Total	Liver Function Tests	0.5	mg/dL	0.2	1.1		0.5	mg/dL	0.2	1.1		Normal				N		Week 12			0.5	Normal	0	03	Entered	63	Male	12FEB16	190	MF4637	<250 mg/day	No	Yes	<250 mg/day	No	Yes	Yes	Yes	Yes
Week 12	03_012	13MAY16	11:15:00	EOS	Abs Eosinophils	Hematology	0.1	K/uL	0	0.6		0.1	K/uL	0	0.6		Normal				N		Week 12			0.1	Normal	0	03	Entered	63	Male	12FEB16	190	MF4637	<250 mg/day	No	Yes	<250 mg/day	No	Yes	Yes	Yes	Yes
Week 12	03_012	13MAY16	11:15:00	EOSLE	Eosinophils	Hematology	2	%	0	4		2	%	0	4		Normal				N		Week 12			2	Normal	0	03	Entered	63	Male	12FEB16	190	MF4637	<250 mg/day	No	Yes	<250 mg/day	No	Yes	Yes	Yes	Yes
Week 12	03_012	13MAY16	11:15:00	GGT	GGT	Liver Function Tests	61	IU/L	7	50		61	IU/L	7	50		High				N		Week 12			57	High	4	03	Entered	63	Male	12FEB16	190	MF4637	<250 mg/day	No	Yes	<250 mg/day	No	Yes	Yes	Yes	Yes
Week 12	03_012	13MAY16	11:15:00	HCT	Hematocrit	Hematology	41.9	%	38	53		41.9	%	38	53		Normal				N		Week 12			46	Normal	-4.1	03	Entered	63	Male	12FEB16	190	MF4637	<250 mg/day	No	Yes	<250 mg/day	No	Yes	Yes	Yes	Yes
Week 12	03_012	13MAY16	11:15:00	HGB	Hemoglobin	Hematology	13.8	g/dL	13.5	17.5		13.8	g/dL	13.5	17.5		Normal				N		Week 12			14.8	Normal	-1	03	Entered	63	Male	12FEB16	190	MF4637	<250 mg/day	No	Yes	<250 mg/day	No	Yes	Yes	Yes	Yes
Week 12	03_012	13MAY16	11:15:00	LYM	Abs Lymphocytes	Hematology	2.2	K/uL	0.8	4		2.2	K/uL	0.8	4		Normal				N		Week 12			2.3	Normal	-0.1	03	Entered	63	Male	12FEB16	190	MF4637	<250 mg/day	No	Yes	<250 mg/day	No	Yes	Yes	Yes	Yes
Week 12	03_012	13MAY16	11:15:00	LYMLE	Lymphocytes	Hematology	35	%	20	50		35	%	20	50		Normal				N		Week 12			35	Normal	0	03	Entered	63	Male	12FEB16	190	MF4637	<250 mg/day	No	Yes	<250 mg/day	No	Yes	Yes	Yes	Yes
Week 12	03_012	13MAY16	11:15:00	MONO	Abs Monocytes	Hematology	0.6	K/uL	0	0.9		0.6	K/uL	0	0.9		Normal				N		Week 12			0.6	Normal	0	03	Entered	63	Male	12FEB16	190	MF4637	<250 mg/day	No	Yes	<250 mg/day	No	Yes	Yes	Yes	Yes
Week 12	03_012	13MAY16	11:15:00	MONOLE	Monocytes	Hematology	9	%	1	9		9	%	1	9		Normal				N		Week 12			9	Normal	0	03	Entered	63	Male	12FEB16	190	MF4637	<250 mg/day	No	Yes	<250 mg/day	No	Yes	Yes	Yes	Yes
Week 12	03_012	13MAY16	11:15:00	NEUT	Abs Neutrophil	Hematology	3.4	K/uL	1.5	7.7		3.4	K/uL	1.5	7.7		Normal				N		Week 12			3.4	Normal	0	03	Entered	63	Male	12FEB16	190	MF4637	<250 mg/day	No	Yes	<250 mg/day	No	Yes	Yes	Yes	Yes
Week 12	03_012	13MAY16	11:15:00	NEUTLE	Neutrophils	Hematology	53	%	45	79		53	%	45	79		Normal				N		Week 12			53	Normal	0	03	Entered	63	Male	12FEB16	190	MF4637	<250 mg/day	No	Yes	<250 mg/day	No	Yes	Yes	Yes	Yes
Week 12	03_012	13MAY16	11:15:00	PLAT	Platelet Count	Hematology	247	K/uL	150	450		247	K/uL	150	450		Normal				N		Week 12			260	Normal	-13	03	Entered	63	Male	12FEB16	190	MF4637	<250 mg/day	No	Yes	<250 mg/day	No	Yes	Yes	Yes	Yes
Week 12	03_012	13MAY16	11:15:00	RBC	RBC	Hematology	4.60	M/uL	4.3	5.8		4.6	M/uL	4.3	5.8		Normal				N		Week 12			5.05	Normal	-0.45	03	Entered	63	Male	12FEB16	190	MF4637	<250 mg/day	No	Yes	<250 mg/day	No	Yes	Yes	Yes	Yes
Week 12	03_012	13MAY16	11:15:00	WBC	WBC	Hematology	6.4	K/uL	4	11		6.4	K/uL	4	11		Normal				N		Week 12			6.5	Normal	-0.1	03	Entered	63	Male	12FEB16	190	MF4637	<250 mg/day	No	Yes	<250 mg/day	No	Yes	Yes	Yes	Yes
Week 24	03_012	01AUG16	10:00:00	ALB	Albumin	Chemistry	4.3	g/dL	3.2	4.6		4.3	g/dL	3.2	4.6		Normal				Y		Week 24			4.8	High	-0.5	03	Entered	63	Male	12FEB16	190	MF4637	<250 mg/day	No	Yes	<250 mg/day	No	Yes	Yes	Yes	Yes
Week 24	03_012	01AUG16	10:00:00	ALP	Alkaline Phosphatase	Liver Function Tests	45	IU/L	32	92		45	IU/L	32	92		Normal				Y		Week 24			52	Normal	-7	03	Entered	63	Male	12FEB16	190	MF4637	<250 mg/day	No	Yes	<250 mg/day	No	Yes	Yes	Yes	Yes
Week 24	03_012	01AUG16	10:00:00	ALT	ALT	Liver Function Tests	46	IU/L	17	63		46	IU/L	17	63		Normal				Y		Week 24			54	Normal	-8	03	Entered	63	Male	12FEB16	190	MF4637	<250 mg/day	No	Yes	<250 mg/day	No	Yes	Yes	Yes	Yes
Week 24	03_012	01AUG16	10:00:00	AST	AST	Liver Function Tests	30	IU/L	15	41		30	IU/L	15	41		Normal				Y		Week 24			32	Normal	-2	03	Entered	63	Male	12FEB16	190	MF4637	<250 mg/day	No	Yes	<250 mg/day	No	Yes	Yes	Yes	Yes
Week 24	03_012	01AUG16	10:00:00	BASO	Abs Basophils	Hematology	0.1	K/uL	0	0.2		0.1	K/uL	0	0.2		Normal				Y		Week 24			0.1	Normal	0	03	Entered	63	Male	12FEB16	190	MF4637	<250 mg/day	No	Yes	<250 mg/day	No	Yes	Yes	Yes	Yes
Week 24	03_012	01AUG16	10:00:00	BASOLE	Basophils	Hematology	1	%	0	2		1	%	0	2		Normal				Y		Week 24			1	Normal	0	03	Entered	63	Male	12FEB16	190	MF4637	<250 mg/day	No	Yes	<250 mg/day	No	Yes	Yes	Yes	Yes
Week 24	03_012	01AUG16	10:00:00	BICARB	BiCarbonate (CO2)	Chemistry	22	mmol/L	22	32		22	mmol/L	22	32		Normal				Y		Week 24			24	Normal	-2	03	Entered	63	Male	12FEB16	190	MF4637	<250 mg/day	No	Yes	<250 mg/day	No	Yes	Yes	Yes	Yes
Week 24	03_012	01AUG16	10:00:00	BILIT	Bilirubin Total	Liver Function Tests	0.4	mg/dL	0.2	1.1		0.4	mg/dL	0.2	1.1		Normal				Y		Week 24			0.5	Normal	-0.1	03	Entered	63	Male	12FEB16	190	MF4637	<250 mg/day	No	Yes	<250 mg/day	No	Yes	Yes	Yes	Yes
Week 24	03_012	01AUG16	10:00:00	BUN	BUN (urea)	Chemistry	27	mg/dL	8	23		27	mg/dL	8	23		High				Y		Week 24			17	Normal	10	03	Entered	63	Male	12FEB16	190	MF4637	<250 mg/day	No	Yes	<250 mg/day	No	Yes	Yes	Yes	Yes
Week 24	03_012	01AUG16	10:00:00	CA	Calcium	Chemistry	9.1	mg/dL	8.8	10.2		9.1	mg/dL	8.8	10.2		Normal				Y		Week 24			10	Normal	-0.9	03	Entered	63	Male	12FEB16	190	MF4637	<250 mg/day	No	Yes	<250 mg/day	No	Yes	Yes	Yes	Yes
Week 24	03_012	01AUG16	10:00:00	CL	Chloride	Chemistry	104	mmol/L	98	107		104	mmol/L	98	107		Normal				Y		Week 24			101	Normal	3	03	Entered	63	Male	12FEB16	190	MF4637	<250 mg/day	No	Yes	<250 mg/day	No	Yes	Yes	Yes	Yes
Week 24	03_012	01AUG16	10:00:00	CREAT	Creatinine	Chemistry	1.1	mg/dL	0.8	1.3		1.1	mg/dL	0.8	1.3		Normal				Y		Week 24			1.2	Normal	-0.1	03	Entered	63	Male	12FEB16	190	MF4637	<250 mg/day	No	Yes	<250 mg/day	No	Yes	Yes	Yes	Yes
Week 24	03_012	01AUG16	10:00:00	CRPHS	hs-CRP	hs-CRP	0.90	mg/L				0.9	mg/L				Normal				Y	hs-CRP CHD risk level: low risk <1.0 mg/L intermediate risk 1.0-3.0 mg/L high risk >3.0 mg/L Values >10 mg/L suggests an inflammatory disorder requiring separate evaluation. Cardiac risk assessment is not appropriate in this context.	Week 24			1.32	Normal	-0.42	03	Entered	63	Male	12FEB16	190	MF4637	<250 mg/day	No	Yes	<250 mg/day	No	Yes	Yes	Yes	Yes
Week 24	03_012	01AUG16	10:00:00	EOS	Abs Eosinophils	Hematology	0.3	K/uL	0	0.6		0.3	K/uL	0	0.6		Normal				Y		Week 24			0.1	Normal	0.2	03	Entered	63	Male	12FEB16	190	MF4637	<250 mg/day	No	Yes	<250 mg/day	No	Yes	Yes	Yes	Yes
Week 24	03_012	01AUG16	10:00:00	EOSLE	Eosinophils	Hematology	5	%	0	4		5	%	0	4		High				Y		Week 24			2	Normal	3	03	Entered	63	Male	12FEB16	190	MF4637	<250 mg/day	No	Yes	<250 mg/day	No	Yes	Yes	Yes	Yes
Week 24	03_012	01AUG16	10:00:00	GGT	GGT	Liver Function Tests	43	IU/L	7	50		43	IU/L	7	50		Normal				Y		Week 24			57	High	-14	03	Entered	63	Male	12FEB16	190	MF4637	<250 mg/day	No	Yes	<250 mg/day	No	Yes	Yes	Yes	Yes
Week 24	03_012	01AUG16	10:00:00	GLUCF	Glucose Fasting	Chemistry	92	mg/dL	70	99		92	mg/dL	70	99		Normal				Y		Week 24			101	High	-9	03	Entered	63	Male	12FEB16	190	MF4637	<250 mg/day	No	Yes	<250 mg/day	No	Yes	Yes	Yes	Yes
Week 24	03_012	01AUG16	10:00:00	HBA1C	HbA1c	HbA1c	5.5	%	4	5.6		5.5	%	4	5.6		Normal				Y	INTERPRETIVE INFORMATION: Hemoglobin A1cHemoglobin A1c values of 5.7-6.4 percent indicate an increasedrisk for developing diabetes mellitus. Hemoglobin A1c valuesgreater than or equal to 6.5 percent are diagnostic of diabetesmellitus. Diagnosis should be confirmed by repeating the Hb A1ctest.This boronate affinity Hb A1c method provides accurate analyticalresults in the presence of nearly all hem…	Week 24			5.6	Normal	-0.1	03	Entered	63	Male	12FEB16	190	MF4637	<250 mg/day	No	Yes	<250 mg/day	No	Yes	Yes	Yes	Yes
Week 24	03_012	01AUG16	10:00:00	HCT	Hematocrit	Hematology	43.4	%	38	53		43.4	%	38	53		Normal				Y		Week 24			46	Normal	-2.6	03	Entered	63	Male	12FEB16	190	MF4637	<250 mg/day	No	Yes	<250 mg/day	No	Yes	Yes	Yes	Yes
Week 24	03_012	01AUG16	10:00:00	HGB	Hemoglobin	Hematology	14.0	g/dL	13.5	17.5		14	g/dL	13.5	17.5		Normal				Y		Week 24			14.8	Normal	-0.8	03	Entered	63	Male	12FEB16	190	MF4637	<250 mg/day	No	Yes	<250 mg/day	No	Yes	Yes	Yes	Yes
Week 24	03_012	01AUG16	10:00:00	INSULIN	Insulin	Insulin	19.9	uIU/mL	1.9	23		19.9	uIU/mL	1.9	23		Normal				Y		Week 24			12.1	Normal	7.8	03	Entered	63	Male	12FEB16	190	MF4637	<250 mg/day	No	Yes	<250 mg/day	No	Yes	Yes	Yes	Yes
Week 24	03_012	01AUG16	10:00:00	K	Potassium	Chemistry	4.2	mmol/L	3.5	5.1		4.2	mmol/L	3.5	5.1		Normal				Y		Week 24			5	Normal	-0.8	03	Entered	63	Male	12FEB16	190	MF4637	<250 mg/day	No	Yes	<250 mg/day	No	Yes	Yes	Yes	Yes
Week 24	03_012	01AUG16	10:00:00	LYM	Abs Lymphocytes	Hematology	1.9	K/uL	0.8	4		1.9	K/uL	0.8	4		Normal				Y		Week 24			2.3	Normal	-0.4	03	Entered	63	Male	12FEB16	190	MF4637	<250 mg/day	No	Yes	<250 mg/day	No	Yes	Yes	Yes	Yes
Week 24	03_012	01AUG16	10:00:00	LYMLE	Lymphocytes	Hematology	37	%	20	50		37	%	20	50		Normal				Y		Week 24			35	Normal	2	03	Entered	63	Male	12FEB16	190	MF4637	<250 mg/day	No	Yes	<250 mg/day	No	Yes	Yes	Yes	Yes
Week 24	03_012	01AUG16	10:00:00	MONO	Abs Monocytes	Hematology	0.5	K/uL	0	0.9		0.5	K/uL	0	0.9		Normal				Y		Week 24			0.6	Normal	-0.1	03	Entered	63	Male	12FEB16	190	MF4637	<250 mg/day	No	Yes	<250 mg/day	No	Yes	Yes	Yes	Yes
Week 24	03_012	01AUG16	10:00:00	MONOLE	Monocytes	Hematology	9	%	1	9		9	%	1	9		Normal				Y		Week 24			9	Normal	0	03	Entered	63	Male	12FEB16	190	MF4637	<250 mg/day	No	Yes	<250 mg/day	No	Yes	Yes	Yes	Yes
Week 24	03_012	01AUG16	10:00:00	NEUT	Abs Neutrophil	Hematology	2.4	K/uL	1.5	7.7		2.4	K/uL	1.5	7.7		Normal				Y		Week 24			3.4	Normal	-1	03	Entered	63	Male	12FEB16	190	MF4637	<250 mg/day	No	Yes	<250 mg/day	No	Yes	Yes	Yes	Yes
Week 24	03_012	01AUG16	10:00:00	NEUTLE	Neutrophils	Hematology	48	%	45	79		48	%	45	79		Normal				Y		Week 24			53	Normal	-5	03	Entered	63	Male	12FEB16	190	MF4637	<250 mg/day	No	Yes	<250 mg/day	No	Yes	Yes	Yes	Yes
Week 24	03_012	01AUG16	10:00:00	PLAT	Platelet Count	Hematology	245	K/uL	150	450		245	K/uL	150	450		Normal				Y		Week 24			260	Normal	-15	03	Entered	63	Male	12FEB16	190	MF4637	<250 mg/day	No	Yes	<250 mg/day	No	Yes	Yes	Yes	Yes
Week 24	03_012	01AUG16	10:00:00	RBC	RBC	Hematology	4.73	M/uL	4.3	5.8		4.73	M/uL	4.3	5.8		Normal				Y		Week 24			5.05	Normal	-0.32	03	Entered	63	Male	12FEB16	190	MF4637	<250 mg/day	No	Yes	<250 mg/day	No	Yes	Yes	Yes	Yes
Week 24	03_012	01AUG16	10:00:00	SODIUM	Sodium	Chemistry	138	mmol/L	136	145		138	mmol/L	136	145		Normal				Y		Week 24			141	Normal	-3	03	Entered	63	Male	12FEB16	190	MF4637	<250 mg/day	No	Yes	<250 mg/day	No	Yes	Yes	Yes	Yes
Week 24	03_012	01AUG16	10:00:00	TRIG	Triglycerides	Chemistry	99	mg/dL		150		99	mg/dL		150		Normal				Y		Week 24			131	Normal	-32	03	Entered	63	Male	12FEB16	190	MF4637	<250 mg/day	No	Yes	<250 mg/day	No	Yes	Yes	Yes	Yes
Week 24	03_012	01AUG16	10:00:00	TSH	TSH	TSH	1.62	uIU/mL	0.34	5.6		1.62	uIU/mL	0.34	5.6		Normal				Y		Week 24			1.73	Normal	-0.11	03	Entered	63	Male	12FEB16	190	MF4637	<250 mg/day	No	Yes	<250 mg/day	No	Yes	Yes	Yes	Yes
Week 24	03_012	01AUG16	10:00:00	WBC	WBC	Hematology	5.0	K/uL	4	11		5	K/uL	4	11		Normal				Y		Week 24			6.5	Normal	-1.5	03	Entered	63	Male	12FEB16	190	MF4637	<250 mg/day	No	Yes	<250 mg/day	No	Yes	Yes	Yes	Yes
Screening	03_013	01FEB16	10:00:00	ALP	Alkaline Phosphatase	Liver Function Tests	125	IU/L	32	92		125	IU/L	32	92		High				N		Screening			134	High		03	Entered	61	Female	11FEB16	189	Placebo	<250 mg/day	No	Yes	<250 mg/day	No	Yes	Yes	Yes	Yes
Screening	03_013	01FEB16	10:00:00	ALT	ALT	Liver Function Tests	81	IU/L	14	54		81	IU/L	14	54		High				N		Screening			79	High		03	Entered	61	Female	11FEB16	189	Placebo	<250 mg/day	No	Yes	<250 mg/day	No	Yes	Yes	Yes	Yes
Screening	03_013	01FEB16	10:00:00	AST	AST	Liver Function Tests	54	IU/L	15	41		54	IU/L	15	41		High				N		Screening			51	High		03	Entered	61	Female	11FEB16	189	Placebo	<250 mg/day	No	Yes	<250 mg/day	No	Yes	Yes	Yes	Yes
Screening	03_013	01FEB16	10:00:00	BILIT	Bilirubin Total	Liver Function Tests	0.4	mg/dL	0.2	1.1		0.4	mg/dL	0.2	1.1		Normal				N		Screening			0.5	Normal		03	Entered	61	Female	11FEB16	189	Placebo	<250 mg/day	No	Yes	<250 mg/day	No	Yes	Yes	Yes	Yes
Screening	03_013	01FEB16	10:00:00	GGT	GGT	Liver Function Tests	240	IU/L	7	50		240	IU/L	7	50		High				N		Screening			276	High		03	Entered	61	Female	11FEB16	189	Placebo	<250 mg/day	No	Yes	<250 mg/day	No	Yes	Yes	Yes	Yes
Screening	03_013	01FEB16	10:00:00	HBA1C	HbA1c	HbA1c	5.9	%	4	5.6		5.9	%	4	5.6		High				N	INTERPRETIVE INFORMATION: Hemoglobin A1cHemoglobin A1c values of 5.7-6.4 percent indicate an increasedrisk for developing diabetes mellitus. Hemoglobin A1c valuesgreater than or equal to 6.5 percent are diagnostic of diabetesmellitus. Diagnosis should be confirmed by repeating the Hb A1ctest.This boronate affinity Hb A1c method provides accurate analyticalresults in the presence of nearly all hem…	Screening			5.9	High		03	Entered	61	Female	11FEB16	189	Placebo	<250 mg/day	No	Yes	<250 mg/day	No	Yes	Yes	Yes	Yes
Screening	03_013	01FEB16	10:00:00	HCAB	Hepatitis C Antibody	Hepatitis C Antibody	NONREACT				NONREACT					NONREACT					N		Screening						03	Entered	61	Female	11FEB16	189	Placebo	<250 mg/day	No	Yes	<250 mg/day	No	Yes	Yes	Yes	Yes
Screening	03_013	01FEB16	10:00:00	TSH	TSH	TSH	2.68	uIU/mL	0.34	5.6		2.68	uIU/mL	0.34	5.6		Normal				N		Screening			2.68	Normal		03	Entered	61	Female	11FEB16	189	Placebo	<250 mg/day	No	Yes	<250 mg/day	No	Yes	Yes	Yes	Yes
Baseline	03_013	10FEB16	10:30:00	ALB	Albumin	Chemistry	4.6	g/dL	3.2	4.6		4.6	g/dL	3.2	4.6		Normal				Y		Baseline			4.6	Normal		03	Entered	61	Female	11FEB16	189	Placebo	<250 mg/day	No	Yes	<250 mg/day	No	Yes	Yes	Yes	Yes
Baseline	03_013	10FEB16	10:30:00	ALP	Alkaline Phosphatase	Liver Function Tests	134	IU/L	32	92		134	IU/L	32	92		High				Y		Baseline			134	High		03	Entered	61	Female	11FEB16	189	Placebo	<250 mg/day	No	Yes	<250 mg/day	No	Yes	Yes	Yes	Yes
Baseline	03_013	10FEB16	10:30:00	ALT	ALT	Liver Function Tests	79	IU/L	14	54		79	IU/L	14	54		High				Y		Baseline			79	High		03	Entered	61	Female	11FEB16	189	Placebo	<250 mg/day	No	Yes	<250 mg/day	No	Yes	Yes	Yes	Yes
Baseline	03_013	10FEB16	10:30:00	AST	AST	Liver Function Tests	51	IU/L	15	41		51	IU/L	15	41		High				Y		Baseline			51	High		03	Entered	61	Female	11FEB16	189	Placebo	<250 mg/day	No	Yes	<250 mg/day	No	Yes	Yes	Yes	Yes
Baseline	03_013	10FEB16	10:30:00	BASO	Abs Basophils	Hematology	0.1	K/uL	0	0.2		0.1	K/uL	0	0.2		Normal				Y		Baseline			0.1	Normal		03	Entered	61	Female	11FEB16	189	Placebo	<250 mg/day	No	Yes	<250 mg/day	No	Yes	Yes	Yes	Yes
Baseline	03_013	10FEB16	10:30:00	BASOLE	Basophils	Hematology	1	%	0	2		1	%	0	2		Normal				Y		Baseline			1	Normal		03	Entered	61	Female	11FEB16	189	Placebo	<250 mg/day	No	Yes	<250 mg/day	No	Yes	Yes	Yes	Yes
Baseline	03_013	10FEB16	10:30:00	BICARB	BiCarbonate (CO2)	Chemistry	21	mmol/L	22	32		21	mmol/L	22	32		Low				Y		Baseline			21	Low		03	Entered	61	Female	11FEB16	189	Placebo	<250 mg/day	No	Yes	<250 mg/day	No	Yes	Yes	Yes	Yes
Baseline	03_013	10FEB16	10:30:00	BILIT	Bilirubin Total	Liver Function Tests	0.5	mg/dL	0.2	1.1		0.5	mg/dL	0.2	1.1		Normal				Y		Baseline			0.5	Normal		03	Entered	61	Female	11FEB16	189	Placebo	<250 mg/day	No	Yes	<250 mg/day	No	Yes	Yes	Yes	Yes
Baseline	03_013	10FEB16	10:30:00	BUN	BUN (urea)	Chemistry	17	mg/dL	8	23		17	mg/dL	8	23		Normal				Y		Baseline			17	Normal		03	Entered	61	Female	11FEB16	189	Placebo	<250 mg/day	No	Yes	<250 mg/day	No	Yes	Yes	Yes	Yes
Baseline	03_013	10FEB16	10:30:00	CA	Calcium	Chemistry	9.6	mg/dL	8.8	10.2		9.6	mg/dL	8.8	10.2		Normal				Y		Baseline			9.6	Normal		03	Entered	61	Female	11FEB16	189	Placebo	<250 mg/day	No	Yes	<250 mg/day	No	Yes	Yes	Yes	Yes
Baseline	03_013	10FEB16	10:30:00	CL	Chloride	Chemistry	107	mmol/L	98	107		107	mmol/L	98	107		Normal				Y		Baseline			107	Normal		03	Entered	61	Female	11FEB16	189	Placebo	<250 mg/day	No	Yes	<250 mg/day	No	Yes	Yes	Yes	Yes
Baseline	03_013	10FEB16	10:30:00	CREAT	Creatinine	Chemistry	1.0	mg/dL	0.6	1.2		1	mg/dL	0.6	1.2		Normal				Y		Baseline			1	Normal		03	Entered	61	Female	11FEB16	189	Placebo	<250 mg/day	No	Yes	<250 mg/day	No	Yes	Yes	Yes	Yes
Baseline	03_013	10FEB16	10:30:00	CRPHS	hs-CRP	hs-CRP	9.08	mg/L				9.08	mg/L				Normal				Y	hs-CRP CHD risk level: low risk <1.0 mg/L intermediate risk 1.0-3.0 mg/L high risk >3.0 mg/L Values >10 mg/L suggests an inflammatory disorder requiring separate evaluation. Cardiac risk assessment is not appropriate in this context.	Baseline			9.08	Normal		03	Entered	61	Female	11FEB16	189	Placebo	<250 mg/day	No	Yes	<250 mg/day	No	Yes	Yes	Yes	Yes
Baseline	03_013	10FEB16	10:30:00	EOS	Abs Eosinophils	Hematology	0.1	K/uL	0	0.6		0.1	K/uL	0	0.6		Normal				Y		Baseline			0.1	Normal		03	Entered	61	Female	11FEB16	189	Placebo	<250 mg/day	No	Yes	<250 mg/day	No	Yes	Yes	Yes	Yes
Baseline	03_013	10FEB16	10:30:00	EOSLE	Eosinophils	Hematology	1	%	0	4		1	%	0	4		Normal				Y		Baseline			1	Normal		03	Entered	61	Female	11FEB16	189	Placebo	<250 mg/day	No	Yes	<250 mg/day	No	Yes	Yes	Yes	Yes
Baseline	03_013	10FEB16	10:30:00	GGT	GGT	Liver Function Tests	276	IU/L	7	50		276	IU/L	7	50		High				Y		Baseline			276	High		03	Entered	61	Female	11FEB16	189	Placebo	<250 mg/day	No	Yes	<250 mg/day	No	Yes	Yes	Yes	Yes
Baseline	03_013	10FEB16	10:30:00	GLUCF	Glucose Fasting	Chemistry	125	mg/dL	70	99		125	mg/dL	70	99		High				Y		Baseline			125	High		03	Entered	61	Female	11FEB16	189	Placebo	<250 mg/day	No	Yes	<250 mg/day	No	Yes	Yes	Yes	Yes
Baseline	03_013	10FEB16	10:30:00	HCT	Hematocrit	Hematology	48.3	%	36	46		48.3	%	36	46		High				Y		Baseline			48.3	High		03	Entered	61	Female	11FEB16	189	Placebo	<250 mg/day	No	Yes	<250 mg/day	No	Yes	Yes	Yes	Yes
Baseline	03_013	10FEB16	10:30:00	HGB	Hemoglobin	Hematology	15.3	g/dL	12	15.5		15.3	g/dL	12	15.5		Normal				Y		Baseline			15.3	Normal		03	Entered	61	Female	11FEB16	189	Placebo	<250 mg/day	No	Yes	<250 mg/day	No	Yes	Yes	Yes	Yes
Baseline	03_013	10FEB16	10:30:00	INSULIN	Insulin	Insulin	20.4	uIU/mL	1.9	23		20.4	uIU/mL	1.9	23		Normal				Y		Baseline			20.4	Normal		03	Entered	61	Female	11FEB16	189	Placebo	<250 mg/day	No	Yes	<250 mg/day	No	Yes	Yes	Yes	Yes
Baseline	03_013	10FEB16	10:30:00	K	Potassium	Chemistry	4.6	mmol/L	3.5	5.1		4.6	mmol/L	3.5	5.1		Normal				Y		Baseline			4.6	Normal		03	Entered	61	Female	11FEB16	189	Placebo	<250 mg/day	No	Yes	<250 mg/day	No	Yes	Yes	Yes	Yes
Baseline	03_013	10FEB16	10:30:00	LYM	Abs Lymphocytes	Hematology	1.6	K/uL	0.8	4		1.6	K/uL	0.8	4		Normal				Y		Baseline			1.6	Normal		03	Entered	61	Female	11FEB16	189	Placebo	<250 mg/day	No	Yes	<250 mg/day	No	Yes	Yes	Yes	Yes
Baseline	03_013	10FEB16	10:30:00	LYMLE	Lymphocytes	Hematology	20	%	20	50		20	%	20	50		Normal				Y		Baseline			20	Normal		03	Entered	61	Female	11FEB16	189	Placebo	<250 mg/day	No	Yes	<250 mg/day	No	Yes	Yes	Yes	Yes
Baseline	03_013	10FEB16	10:30:00	MONO	Abs Monocytes	Hematology	0.2	K/uL	0	0.9		0.2	K/uL	0	0.9		Normal				Y		Baseline			0.2	Normal		03	Entered	61	Female	11FEB16	189	Placebo	<250 mg/day	No	Yes	<250 mg/day	No	Yes	Yes	Yes	Yes
Baseline	03_013	10FEB16	10:30:00	MONOLE	Monocytes	Hematology	3	%	1	9		3	%	1	9		Normal				Y		Baseline			3	Normal		03	Entered	61	Female	11FEB16	189	Placebo	<250 mg/day	No	Yes	<250 mg/day	No	Yes	Yes	Yes	Yes
Baseline	03_013	10FEB16	10:30:00	NEUT	Abs Neutrophil	Hematology	6.2	K/uL	1.5	7.7		6.2	K/uL	1.5	7.7		Normal				Y		Baseline			6.2	Normal		03	Entered	61	Female	11FEB16	189	Placebo	<250 mg/day	No	Yes	<250 mg/day	No	Yes	Yes	Yes	Yes
Baseline	03_013	10FEB16	10:30:00	NEUTLE	Neutrophils	Hematology	76	%	45	79		76	%	45	79		Normal				Y		Baseline			76	Normal		03	Entered	61	Female	11FEB16	189	Placebo	<250 mg/day	No	Yes	<250 mg/day	No	Yes	Yes	Yes	Yes
Baseline	03_013	10FEB16	10:30:00	PLAT	Platelet Count	Hematology	278	K/uL	150	450		278	K/uL	150	450		Normal				Y		Baseline			278	Normal		03	Entered	61	Female	11FEB16	189	Placebo	<250 mg/day	No	Yes	<250 mg/day	No	Yes	Yes	Yes	Yes
Baseline	03_013	10FEB16	10:30:00	RBC	RBC	Hematology	5.22	M/uL	3.7	5.2		5.22	M/uL	3.7	5.2		High				Y		Baseline			5.22	High		03	Entered	61	Female	11FEB16	189	Placebo	<250 mg/day	No	Yes	<250 mg/day	No	Yes	Yes	Yes	Yes
Baseline	03_013	10FEB16	10:30:00	SODIUM	Sodium	Chemistry	142	mmol/L	136	145		142	mmol/L	136	145		Normal				Y		Baseline			142	Normal		03	Entered	61	Female	11FEB16	189	Placebo	<250 mg/day	No	Yes	<250 mg/day	No	Yes	Yes	Yes	Yes
Baseline	03_013	10FEB16	10:30:00	TRIG	Triglycerides	Chemistry	80	mg/dL		150		80	mg/dL		150		Normal				Y		Baseline			80	Normal		03	Entered	61	Female	11FEB16	189	Placebo	<250 mg/day	No	Yes	<250 mg/day	No	Yes	Yes	Yes	Yes
Baseline	03_013	10FEB16	10:30:00	WBC	WBC	Hematology	8.2	K/uL	4	11		8.2	K/uL	4	11		Normal				Y		Baseline			8.2	Normal		03	Entered	61	Female	11FEB16	189	Placebo	<250 mg/day	No	Yes	<250 mg/day	No	Yes	Yes	Yes	Yes
Week 12	03_013	10MAY16	9:10:00	ALP	Alkaline Phosphatase	Liver Function Tests	122	IU/L	32	92		122	IU/L	32	92		High				N		Week 12			134	High	-12	03	Entered	61	Female	11FEB16	189	Placebo	<250 mg/day	No	Yes	<250 mg/day	No	Yes	Yes	Yes	Yes
Week 12	03_013	10MAY16	9:10:00	ALT	ALT	Liver Function Tests	76	IU/L	14	54		76	IU/L	14	54		High				N		Week 12			79	High	-3	03	Entered	61	Female	11FEB16	189	Placebo	<250 mg/day	No	Yes	<250 mg/day	No	Yes	Yes	Yes	Yes
Week 12	03_013	10MAY16	9:10:00	AST	AST	Liver Function Tests	59	IU/L	15	41		59	IU/L	15	41		High				N		Week 12			51	High	8	03	Entered	61	Female	11FEB16	189	Placebo	<250 mg/day	No	Yes	<250 mg/day	No	Yes	Yes	Yes	Yes
Week 12	03_013	10MAY16	9:10:00	BASO	Abs Basophils	Hematology	0.0	K/uL	0	0.2		0	K/uL	0	0.2		Normal				N		Week 12			0.1	Normal	-0.1	03	Entered	61	Female	11FEB16	189	Placebo	<250 mg/day	No	Yes	<250 mg/day	No	Yes	Yes	Yes	Yes
Week 12	03_013	10MAY16	9:10:00	BASOLE	Basophils	Hematology	0	%	0	2		0	%	0	2		Normal				N		Week 12			1	Normal	-1	03	Entered	61	Female	11FEB16	189	Placebo	<250 mg/day	No	Yes	<250 mg/day	No	Yes	Yes	Yes	Yes
Week 12	03_013	10MAY16	9:10:00	BILIT	Bilirubin Total	Liver Function Tests	0.3	mg/dL	0.2	1.1		0.3	mg/dL	0.2	1.1		Normal				N		Week 12			0.5	Normal	-0.2	03	Entered	61	Female	11FEB16	189	Placebo	<250 mg/day	No	Yes	<250 mg/day	No	Yes	Yes	Yes	Yes
Week 12	03_013	10MAY16	9:10:00	EOS	Abs Eosinophils	Hematology	0.3	K/uL	0	0.6		0.3	K/uL	0	0.6		Normal				N		Week 12			0.1	Normal	0.2	03	Entered	61	Female	11FEB16	189	Placebo	<250 mg/day	No	Yes	<250 mg/day	No	Yes	Yes	Yes	Yes
Week 12	03_013	10MAY16	9:10:00	EOSLE	Eosinophils	Hematology	4	%	0	4		4	%	0	4		Normal				N		Week 12			1	Normal	3	03	Entered	61	Female	11FEB16	189	Placebo	<250 mg/day	No	Yes	<250 mg/day	No	Yes	Yes	Yes	Yes
Week 12	03_013	10MAY16	9:10:00	GGT	GGT	Liver Function Tests	198	IU/L	7	50		198	IU/L	7	50		High				N		Week 12			276	High	-78	03	Entered	61	Female	11FEB16	189	Placebo	<250 mg/day	No	Yes	<250 mg/day	No	Yes	Yes	Yes	Yes
Week 12	03_013	10MAY16	9:10:00	HCT	Hematocrit	Hematology	44.4	%	36	46		44.4	%	36	46		Normal				N		Week 12			48.3	High	-3.9	03	Entered	61	Female	11FEB16	189	Placebo	<250 mg/day	No	Yes	<250 mg/day	No	Yes	Yes	Yes	Yes
Week 12	03_013	10MAY16	9:10:00	HGB	Hemoglobin	Hematology	14.5	g/dL	12	15.5		14.5	g/dL	12	15.5		Normal				N		Week 12			15.3	Normal	-0.8	03	Entered	61	Female	11FEB16	189	Placebo	<250 mg/day	No	Yes	<250 mg/day	No	Yes	Yes	Yes	Yes
Week 12	03_013	10MAY16	9:10:00	LYM	Abs Lymphocytes	Hematology	2.1	K/uL	0.8	4		2.1	K/uL	0.8	4		Normal				N		Week 12			1.6	Normal	0.5	03	Entered	61	Female	11FEB16	189	Placebo	<250 mg/day	No	Yes	<250 mg/day	No	Yes	Yes	Yes	Yes
Week 12	03_013	10MAY16	9:10:00	LYMLE	Lymphocytes	Hematology	27	%	20	50		27	%	20	50		Normal				N		Week 12			20	Normal	7	03	Entered	61	Female	11FEB16	189	Placebo	<250 mg/day	No	Yes	<250 mg/day	No	Yes	Yes	Yes	Yes
Week 12	03_013	10MAY16	9:10:00	MONO	Abs Monocytes	Hematology	0.5	K/uL	0	0.9		0.5	K/uL	0	0.9		Normal				N		Week 12			0.2	Normal	0.3	03	Entered	61	Female	11FEB16	189	Placebo	<250 mg/day	No	Yes	<250 mg/day	No	Yes	Yes	Yes	Yes
Week 12	03_013	10MAY16	9:10:00	MONOLE	Monocytes	Hematology	6	%	1	9		6	%	1	9		Normal				N		Week 12			3	Normal	3	03	Entered	61	Female	11FEB16	189	Placebo	<250 mg/day	No	Yes	<250 mg/day	No	Yes	Yes	Yes	Yes
Week 12	03_013	10MAY16	9:10:00	NEUT	Abs Neutrophil	Hematology	5.1	K/uL	1.5	7.7		5.1	K/uL	1.5	7.7		Normal				N		Week 12			6.2	Normal	-1.1	03	Entered	61	Female	11FEB16	189	Placebo	<250 mg/day	No	Yes	<250 mg/day	No	Yes	Yes	Yes	Yes
Week 12	03_013	10MAY16	9:10:00	NEUTLE	Neutrophils	Hematology	64	%	45	79		64	%	45	79		Normal				N		Week 12			76	Normal	-12	03	Entered	61	Female	11FEB16	189	Placebo	<250 mg/day	No	Yes	<250 mg/day	No	Yes	Yes	Yes	Yes
Week 12	03_013	10MAY16	9:10:00	PLAT	Platelet Count	Hematology	286	K/uL	150	450		286	K/uL	150	450		Normal				N		Week 12			278	Normal	8	03	Entered	61	Female	11FEB16	189	Placebo	<250 mg/day	No	Yes	<250 mg/day	No	Yes	Yes	Yes	Yes
Week 12	03_013	10MAY16	9:10:00	RBC	RBC	Hematology	4.85	M/uL	3.7	5.2		4.85	M/uL	3.7	5.2		Normal				N		Week 12			5.22	High	-0.37	03	Entered	61	Female	11FEB16	189	Placebo	<250 mg/day	No	Yes	<250 mg/day	No	Yes	Yes	Yes	Yes
Week 12	03_013	10MAY16	9:10:00	WBC	WBC	Hematology	7.9	K/uL	4	11		7.9	K/uL	4	11		Normal				N		Week 12			8.2	Normal	-0.3	03	Entered	61	Female	11FEB16	189	Placebo	<250 mg/day	No	Yes	<250 mg/day	No	Yes	Yes	Yes	Yes
Week 24	03_013	25JUL16	9:15:00	ALB	Albumin	Chemistry	4.1	g/dL	3.2	4.6		4.1	g/dL	3.2	4.6		Normal				Y		Week 24			4.6	Normal	-0.5	03	Entered	61	Female	11FEB16	189	Placebo	<250 mg/day	No	Yes	<250 mg/day	No	Yes	Yes	Yes	Yes
Week 24	03_013	25JUL16	9:15:00	ALP	Alkaline Phosphatase	Liver Function Tests	115	IU/L	32	92		115	IU/L	32	92		High				Y		Week 24			134	High	-19	03	Entered	61	Female	11FEB16	189	Placebo	<250 mg/day	No	Yes	<250 mg/day	No	Yes	Yes	Yes	Yes
Week 24	03_013	25JUL16	9:15:00	ALT	ALT	Liver Function Tests	56	IU/L	14	54		56	IU/L	14	54		High				Y		Week 24			79	High	-23	03	Entered	61	Female	11FEB16	189	Placebo	<250 mg/day	No	Yes	<250 mg/day	No	Yes	Yes	Yes	Yes
Week 24	03_013	25JUL16	9:15:00	AST	AST	Liver Function Tests	37	IU/L	15	41		37	IU/L	15	41		Normal				Y		Week 24			51	High	-14	03	Entered	61	Female	11FEB16	189	Placebo	<250 mg/day	No	Yes	<250 mg/day	No	Yes	Yes	Yes	Yes
Week 24	03_013	25JUL16	9:15:00	BASO	Abs Basophils	Hematology	0.1	K/uL	0	0.2		0.1	K/uL	0	0.2		Normal				Y		Week 24			0.1	Normal	0	03	Entered	61	Female	11FEB16	189	Placebo	<250 mg/day	No	Yes	<250 mg/day	No	Yes	Yes	Yes	Yes
Week 24	03_013	25JUL16	9:15:00	BASOLE	Basophils	Hematology	1	%	0	2		1	%	0	2		Normal				Y		Week 24			1	Normal	0	03	Entered	61	Female	11FEB16	189	Placebo	<250 mg/day	No	Yes	<250 mg/day	No	Yes	Yes	Yes	Yes
Week 24	03_013	25JUL16	9:15:00	BICARB	BiCarbonate (CO2)	Chemistry	20	mmol/L	22	32		20	mmol/L	22	32		Low				Y		Week 24			21	Low	-1	03	Entered	61	Female	11FEB16	189	Placebo	<250 mg/day	No	Yes	<250 mg/day	No	Yes	Yes	Yes	Yes
Week 24	03_013	25JUL16	9:15:00	BILIT	Bilirubin Total	Liver Function Tests	0.3	mg/dL	0.2	1.1		0.3	mg/dL	0.2	1.1		Normal				Y		Week 24			0.5	Normal	-0.2	03	Entered	61	Female	11FEB16	189	Placebo	<250 mg/day	No	Yes	<250 mg/day	No	Yes	Yes	Yes	Yes
Week 24	03_013	25JUL16	9:15:00	BUN	BUN (urea)	Chemistry	23	mg/dL	8	23		23	mg/dL	8	23		Normal				Y		Week 24			17	Normal	6	03	Entered	61	Female	11FEB16	189	Placebo	<250 mg/day	No	Yes	<250 mg/day	No	Yes	Yes	Yes	Yes
Week 24	03_013	25JUL16	9:15:00	CA	Calcium	Chemistry	8.8	mg/dL	8.8	10.2		8.8	mg/dL	8.8	10.2		Normal				Y		Week 24			9.6	Normal	-0.8	03	Entered	61	Female	11FEB16	189	Placebo	<250 mg/day	No	Yes	<250 mg/day	No	Yes	Yes	Yes	Yes
Week 24	03_013	25JUL16	9:15:00	CL	Chloride	Chemistry	108	mmol/L	98	107		108	mmol/L	98	107		High				Y		Week 24			107	Normal	1	03	Entered	61	Female	11FEB16	189	Placebo	<250 mg/day	No	Yes	<250 mg/day	No	Yes	Yes	Yes	Yes
Week 24	03_013	25JUL16	9:15:00	CREAT	Creatinine	Chemistry	1.0	mg/dL	0.6	1.2		1	mg/dL	0.6	1.2		Normal				Y		Week 24			1	Normal	0	03	Entered	61	Female	11FEB16	189	Placebo	<250 mg/day	No	Yes	<250 mg/day	No	Yes	Yes	Yes	Yes
Week 24	03_013	25JUL16	9:15:00	CRPHS	hs-CRP	hs-CRP	12.30	mg/L				12.3	mg/L				Normal				Y	hs-CRP CHD risk level: low risk <1.0 mg/L intermediate risk 1.0-3.0 mg/L high risk >3.0 mg/L Values >10 mg/L suggests an inflammatory disorder requiring separate evaluation. Cardiac risk assessment is not appropriate in this context.	Week 24			9.08	Normal	3.22	03	Entered	61	Female	11FEB16	189	Placebo	<250 mg/day	No	Yes	<250 mg/day	No	Yes	Yes	Yes	Yes
Week 24	03_013	25JUL16	9:15:00	EOS	Abs Eosinophils	Hematology	0.2	K/uL	0	0.6		0.2	K/uL	0	0.6		Normal				Y		Week 24			0.1	Normal	0.1	03	Entered	61	Female	11FEB16	189	Placebo	<250 mg/day	No	Yes	<250 mg/day	No	Yes	Yes	Yes	Yes
Week 24	03_013	25JUL16	9:15:00	EOSLE	Eosinophils	Hematology	2	%	0	4		2	%	0	4		Normal				Y		Week 24			1	Normal	1	03	Entered	61	Female	11FEB16	189	Placebo	<250 mg/day	No	Yes	<250 mg/day	No	Yes	Yes	Yes	Yes
Week 24	03_013	25JUL16	9:15:00	GGT	GGT	Liver Function Tests	162	IU/L	7	50		162	IU/L	7	50		High				Y		Week 24			276	High	-114	03	Entered	61	Female	11FEB16	189	Placebo	<250 mg/day	No	Yes	<250 mg/day	No	Yes	Yes	Yes	Yes
Week 24	03_013	25JUL16	9:15:00	GLUCF	Glucose Fasting	Chemistry	118	mg/dL	70	99		118	mg/dL	70	99		High				Y		Week 24			125	High	-7	03	Entered	61	Female	11FEB16	189	Placebo	<250 mg/day	No	Yes	<250 mg/day	No	Yes	Yes	Yes	Yes
Week 24	03_013	25JUL16	9:15:00	HBA1C	HbA1c	HbA1c	6.1	%	4	5.6		6.1	%	4	5.6		High				Y	INTERPRETIVE INFORMATION: Hemoglobin A1cHemoglobin A1c values of 5.7-6.4 percent indicate an increasedrisk for developing diabetes mellitus. Hemoglobin A1c valuesgreater than or equal to 6.5 percent are diagnostic of diabetesmellitus. Diagnosis should be confirmed by repeating the Hb A1ctest.This boronate affinity Hb A1c method provides accurate analyticalresults in the presence of nearly all hem…	Week 24			5.9	High	0.2	03	Entered	61	Female	11FEB16	189	Placebo	<250 mg/day	No	Yes	<250 mg/day	No	Yes	Yes	Yes	Yes
Week 24	03_013	25JUL16	9:15:00	HCT	Hematocrit	Hematology	44.2	%	36	46		44.2	%	36	46		Normal				Y		Week 24			48.3	High	-4.1	03	Entered	61	Female	11FEB16	189	Placebo	<250 mg/day	No	Yes	<250 mg/day	No	Yes	Yes	Yes	Yes
Week 24	03_013	25JUL16	9:15:00	HGB	Hemoglobin	Hematology	14.3	g/dL	12	15.5		14.3	g/dL	12	15.5		Normal				Y		Week 24			15.3	Normal	-1	03	Entered	61	Female	11FEB16	189	Placebo	<250 mg/day	No	Yes	<250 mg/day	No	Yes	Yes	Yes	Yes
Week 24	03_013	25JUL16	9:15:00	INSULIN	Insulin	Insulin	23.6	uIU/mL	1.9	23		23.6	uIU/mL	1.9	23		High				Y		Week 24			20.4	Normal	3.2	03	Entered	61	Female	11FEB16	189	Placebo	<250 mg/day	No	Yes	<250 mg/day	No	Yes	Yes	Yes	Yes
Week 24	03_013	25JUL16	9:15:00	K	Potassium	Chemistry	3.8	mmol/L	3.5	5.1		3.8	mmol/L	3.5	5.1		Normal				Y		Week 24			4.6	Normal	-0.8	03	Entered	61	Female	11FEB16	189	Placebo	<250 mg/day	No	Yes	<250 mg/day	No	Yes	Yes	Yes	Yes
Week 24	03_013	25JUL16	9:15:00	LYM	Abs Lymphocytes	Hematology	2.2	K/uL	0.8	4		2.2	K/uL	0.8	4		Normal				Y		Week 24			1.6	Normal	0.6	03	Entered	61	Female	11FEB16	189	Placebo	<250 mg/day	No	Yes	<250 mg/day	No	Yes	Yes	Yes	Yes
Week 24	03_013	25JUL16	9:15:00	LYMLE	Lymphocytes	Hematology	25	%	20	50		25	%	20	50		Normal				Y		Week 24			20	Normal	5	03	Entered	61	Female	11FEB16	189	Placebo	<250 mg/day	No	Yes	<250 mg/day	No	Yes	Yes	Yes	Yes
Week 24	03_013	25JUL16	9:15:00	MONO	Abs Monocytes	Hematology	0.4	K/uL	0	0.9		0.4	K/uL	0	0.9		Normal				Y		Week 24			0.2	Normal	0.2	03	Entered	61	Female	11FEB16	189	Placebo	<250 mg/day	No	Yes	<250 mg/day	No	Yes	Yes	Yes	Yes
Week 24	03_013	25JUL16	9:15:00	MONOLE	Monocytes	Hematology	5	%	1	9		5	%	1	9		Normal				Y		Week 24			3	Normal	2	03	Entered	61	Female	11FEB16	189	Placebo	<250 mg/day	No	Yes	<250 mg/day	No	Yes	Yes	Yes	Yes
Week 24	03_013	25JUL16	9:15:00	NEUT	Abs Neutrophil	Hematology	6.0	K/uL	1.5	7.7		6	K/uL	1.5	7.7		Normal				Y		Week 24			6.2	Normal	-0.2	03	Entered	61	Female	11FEB16	189	Placebo	<250 mg/day	No	Yes	<250 mg/day	No	Yes	Yes	Yes	Yes
Week 24	03_013	25JUL16	9:15:00	NEUTLE	Neutrophils	Hematology	67	%	45	79		67	%	45	79		Normal				Y		Week 24			76	Normal	-9	03	Entered	61	Female	11FEB16	189	Placebo	<250 mg/day	No	Yes	<250 mg/day	No	Yes	Yes	Yes	Yes
Week 24	03_013	25JUL16	9:15:00	PLAT	Platelet Count	Hematology	272	K/uL	150	450		272	K/uL	150	450		Normal				Y		Week 24			278	Normal	-6	03	Entered	61	Female	11FEB16	189	Placebo	<250 mg/day	No	Yes	<250 mg/day	No	Yes	Yes	Yes	Yes
Week 24	03_013	25JUL16	9:15:00	RBC	RBC	Hematology	4.83	M/uL	3.7	5.2		4.83	M/uL	3.7	5.2		Normal				Y		Week 24			5.22	High	-0.39	03	Entered	61	Female	11FEB16	189	Placebo	<250 mg/day	No	Yes	<250 mg/day	No	Yes	Yes	Yes	Yes
Week 24	03_013	25JUL16	9:15:00	SODIUM	Sodium	Chemistry	140	mmol/L	136	145		140	mmol/L	136	145		Normal				Y		Week 24			142	Normal	-2	03	Entered	61	Female	11FEB16	189	Placebo	<250 mg/day	No	Yes	<250 mg/day	No	Yes	Yes	Yes	Yes
Week 24	03_013	25JUL16	9:15:00	TRIG	Triglycerides	Chemistry	93	mg/dL		150		93	mg/dL		150		Normal				Y		Week 24			80	Normal	13	03	Entered	61	Female	11FEB16	189	Placebo	<250 mg/day	No	Yes	<250 mg/day	No	Yes	Yes	Yes	Yes
Week 24	03_013	25JUL16	9:15:00	TSH	TSH	TSH	2.17	uIU/mL	0.34	5.6		2.17	uIU/mL	0.34	5.6		Normal				Y		Week 24			2.68	Normal	-0.51	03	Entered	61	Female	11FEB16	189	Placebo	<250 mg/day	No	Yes	<250 mg/day	No	Yes	Yes	Yes	Yes
Week 24	03_013	25JUL16	9:15:00	WBC	WBC	Hematology	8.9	K/uL	4	11		8.9	K/uL	4	11		Normal				Y		Week 24			8.2	Normal	0.7	03	Entered	61	Female	11FEB16	189	Placebo	<250 mg/day	No	Yes	<250 mg/day	No	Yes	Yes	Yes	Yes
Screening	04_001	06OCT15	10:30:00	ALP	Alkaline Phosphatase	Liver Function Tests	436	IU/L	32	92		436	IU/L	32	92		High				N		Screening			270	High		04	Entered	49	Female	13OCT15	124	Placebo	>=250 mg/day	Yes	No	>=250 mg/day	No	Yes	Yes	Yes	Yes
Screening	04_001	06OCT15	10:30:00	ALT	ALT	Liver Function Tests	152	IU/L	14	54		152	IU/L	14	54		High				N		Screening			110	High		04	Entered	49	Female	13OCT15	124	Placebo	>=250 mg/day	Yes	No	>=250 mg/day	No	Yes	Yes	Yes	Yes
Screening	04_001	06OCT15	10:30:00	AST	AST	Liver Function Tests	72	IU/L	15	41		72	IU/L	15	41		High				N		Screening			51	High		04	Entered	49	Female	13OCT15	124	Placebo	>=250 mg/day	Yes	No	>=250 mg/day	No	Yes	Yes	Yes	Yes
Screening	04_001	06OCT15	10:30:00	BILIT	Bilirubin Total	Liver Function Tests	0.3	mg/dL	0.3	1.2		0.3	mg/dL	0.3	1.2		Normal				N		Screening			0.3	Normal		04	Entered	49	Female	13OCT15	124	Placebo	>=250 mg/day	Yes	No	>=250 mg/day	No	Yes	Yes	Yes	Yes
Screening	04_001	06OCT15	10:30:00	GGT	GGT	Liver Function Tests	47	IU/L	7	50		47	IU/L	7	50		Normal				N		Screening			48	Normal		04	Entered	49	Female	13OCT15	124	Placebo	>=250 mg/day	Yes	No	>=250 mg/day	No	Yes	Yes	Yes	Yes
Screening	04_001	06OCT15	10:30:00	HBA1C	HbA1c	HbA1c	10.6	%	4	5.6		10.6	%	4	5.6		High				N	INTERPRETIVE INFORMATION: Hemoglobin A1cHemoglobin A1c values of 5.7-6.4 percent indicate an increasedrisk for developing diabetes mellitus. Hemoglobin A1c valuesgreater than or equal to 6.5 percent are diagnostic of diabetesmellitus. Diagnosis should be confirmed by repeating the Hb A1ctest.This boronate affinity Hb A1c method provides accurate analyticalresults in the presence of nearly all hem…	Screening			10.6	High		04	Entered	49	Female	13OCT15	124	Placebo	>=250 mg/day	Yes	No	>=250 mg/day	No	Yes	Yes	Yes	Yes
Screening	04_001	06OCT15	10:30:00	HCAB	Hepatitis C Antibody	Hepatitis C Antibody	NONREACT				NONREACT					NONREACT					N		Screening						04	Entered	49	Female	13OCT15	124	Placebo	>=250 mg/day	Yes	No	>=250 mg/day	No	Yes	Yes	Yes	Yes
Screening	04_001	06OCT15	10:30:00	TSH	TSH	TSH	0.98	uIU/mL	0.34	5.6		0.98	uIU/mL	0.34	5.6		Normal				N		Screening			0.98	Normal		04	Entered	49	Female	13OCT15	124	Placebo	>=250 mg/day	Yes	No	>=250 mg/day	No	Yes	Yes	Yes	Yes
Baseline	04_001	13OCT15	12:25:00	ALB	Albumin	Chemistry	4.4	g/dL	3.5	5.2		4.4	g/dL	3.5	5.2		Normal				N		Baseline			4.4	Normal		04	Entered	49	Female	13OCT15	124	Placebo	>=250 mg/day	Yes	No	>=250 mg/day	No	Yes	Yes	Yes	Yes
Baseline	04_001	13OCT15	12:25:00	ALP	Alkaline Phosphatase	Liver Function Tests	270	IU/L	32	92		270	IU/L	32	92		High				N		Baseline			270	High		04	Entered	49	Female	13OCT15	124	Placebo	>=250 mg/day	Yes	No	>=250 mg/day	No	Yes	Yes	Yes	Yes
Baseline	04_001	13OCT15	12:25:00	ALT	ALT	Liver Function Tests	110	IU/L	14	54		110	IU/L	14	54		High				N		Baseline			110	High		04	Entered	49	Female	13OCT15	124	Placebo	>=250 mg/day	Yes	No	>=250 mg/day	No	Yes	Yes	Yes	Yes
Baseline	04_001	13OCT15	12:25:00	AST	AST	Liver Function Tests	51	IU/L	15	41		51	IU/L	15	41		High				N		Baseline			51	High		04	Entered	49	Female	13OCT15	124	Placebo	>=250 mg/day	Yes	No	>=250 mg/day	No	Yes	Yes	Yes	Yes
Baseline	04_001	13OCT15	12:25:00	BASO	Abs Basophils	Hematology	0.1	K/uL	0	0.2		0.1	K/uL	0	0.2		Normal				N		Baseline			0.1	Normal		04	Entered	49	Female	13OCT15	124	Placebo	>=250 mg/day	Yes	No	>=250 mg/day	No	Yes	Yes	Yes	Yes
Baseline	04_001	13OCT15	12:25:00	BASOLE	Basophils	Hematology	1	%	0	2		1	%	0	2		Normal				N		Baseline			1	Normal		04	Entered	49	Female	13OCT15	124	Placebo	>=250 mg/day	Yes	No	>=250 mg/day	No	Yes	Yes	Yes	Yes
Baseline	04_001	13OCT15	12:25:00	BICARB	BiCarbonate (CO2)	Chemistry	22	mmol/L	22	32		22	mmol/L	22	32		Normal				N		Baseline			22	Normal		04	Entered	49	Female	13OCT15	124	Placebo	>=250 mg/day	Yes	No	>=250 mg/day	No	Yes	Yes	Yes	Yes
Baseline	04_001	13OCT15	12:25:00	BILIT	Bilirubin Total	Liver Function Tests	0.3	mg/dL	0.3	1.2		0.3	mg/dL	0.3	1.2		Normal				N		Baseline			0.3	Normal		04	Entered	49	Female	13OCT15	124	Placebo	>=250 mg/day	Yes	No	>=250 mg/day	No	Yes	Yes	Yes	Yes
Baseline	04_001	13OCT15	12:25:00	BUN	BUN (urea)	Chemistry	17	mg/dL	6	20		17	mg/dL	6	20		Normal				N		Baseline			17	Normal		04	Entered	49	Female	13OCT15	124	Placebo	>=250 mg/day	Yes	No	>=250 mg/day	No	Yes	Yes	Yes	Yes
Baseline	04_001	13OCT15	12:25:00	CA	Calcium	Chemistry	9.6	mg/dL	8.6	10		9.6	mg/dL	8.6	10		Normal				N		Baseline			9.6	Normal		04	Entered	49	Female	13OCT15	124	Placebo	>=250 mg/day	Yes	No	>=250 mg/day	No	Yes	Yes	Yes	Yes
Baseline	04_001	13OCT15	12:25:00	CL	Chloride	Chemistry	99	mmol/L	98	107		99	mmol/L	98	107		Normal				N		Baseline			99	Normal		04	Entered	49	Female	13OCT15	124	Placebo	>=250 mg/day	Yes	No	>=250 mg/day	No	Yes	Yes	Yes	Yes
Baseline	04_001	13OCT15	12:25:00	CREAT	Creatinine	Chemistry	0.8	mg/dL	0.6	1.1		0.8	mg/dL	0.6	1.1		Normal				N		Baseline			0.8	Normal		04	Entered	49	Female	13OCT15	124	Placebo	>=250 mg/day	Yes	No	>=250 mg/day	No	Yes	Yes	Yes	Yes
Baseline	04_001	13OCT15	12:25:00	CRPHS	hs-CRP	hs-CRP	3.42	mg/L				3.42	mg/L				Normal				N	hs-CRP CHD risk level: low risk <1.0 mg/L intermediate risk 1.0-3.0 mg/L high risk >3.0 mg/L Values >10 mg/L suggests an inflammatory disorder requiring separate evaluation. Cardiac risk assessment is not appropriate in this context.	Baseline			3.42	Normal		04	Entered	49	Female	13OCT15	124	Placebo	>=250 mg/day	Yes	No	>=250 mg/day	No	Yes	Yes	Yes	Yes
Baseline	04_001	13OCT15	12:25:00	EOS	Abs Eosinophils	Hematology	0.2	K/uL	0	0.6		0.2	K/uL	0	0.6		Normal				N		Baseline			0.2	Normal		04	Entered	49	Female	13OCT15	124	Placebo	>=250 mg/day	Yes	No	>=250 mg/day	No	Yes	Yes	Yes	Yes
Baseline	04_001	13OCT15	12:25:00	EOSLE	Eosinophils	Hematology	2	%	0	4		2	%	0	4		Normal				N		Baseline			2	Normal		04	Entered	49	Female	13OCT15	124	Placebo	>=250 mg/day	Yes	No	>=250 mg/day	No	Yes	Yes	Yes	Yes
Baseline	04_001	13OCT15	12:25:00	GGT	GGT	Liver Function Tests	48	IU/L	7	50		48	IU/L	7	50		Normal				N		Baseline			48	Normal		04	Entered	49	Female	13OCT15	124	Placebo	>=250 mg/day	Yes	No	>=250 mg/day	No	Yes	Yes	Yes	Yes
Baseline	04_001	13OCT15	12:25:00	GLUC	Glucose Random	Chemistry	383	mg/dL	70	139		383	mg/dL	70	139		High				N		Baseline			383	High		04	Entered	49	Female	13OCT15	124	Placebo	>=250 mg/day	Yes	No	>=250 mg/day	No	Yes	Yes	Yes	Yes
Baseline	04_001	13OCT15	12:25:00	HCT	Hematocrit	Hematology	42.0	%	36	46		42	%	36	46		Normal				N		Baseline			42	Normal		04	Entered	49	Female	13OCT15	124	Placebo	>=250 mg/day	Yes	No	>=250 mg/day	No	Yes	Yes	Yes	Yes
Baseline	04_001	13OCT15	12:25:00	HGB	Hemoglobin	Hematology	14.1	g/dL	12	15.5		14.1	g/dL	12	15.5		Normal				N		Baseline			14.1	Normal		04	Entered	49	Female	13OCT15	124	Placebo	>=250 mg/day	Yes	No	>=250 mg/day	No	Yes	Yes	Yes	Yes
Baseline	04_001	13OCT15	12:25:00	INSULIN	Insulin	Insulin	82.8	uIU/mL	1.9	23		82.8	uIU/mL	1.9	23		High				N		Baseline			82.8	High		04	Entered	49	Female	13OCT15	124	Placebo	>=250 mg/day	Yes	No	>=250 mg/day	No	Yes	Yes	Yes	Yes
Baseline	04_001	13OCT15	12:25:00	K	Potassium	Chemistry	4.0	mmol/L	3.5	5.1		4	mmol/L	3.5	5.1		Normal				N		Baseline			4	Normal		04	Entered	49	Female	13OCT15	124	Placebo	>=250 mg/day	Yes	No	>=250 mg/day	No	Yes	Yes	Yes	Yes
Baseline	04_001	13OCT15	12:25:00	LYM	Abs Lymphocytes	Hematology	3.5	K/uL	0.8	4		3.5	K/uL	0.8	4		Normal				N		Baseline			3.5	Normal		04	Entered	49	Female	13OCT15	124	Placebo	>=250 mg/day	Yes	No	>=250 mg/day	No	Yes	Yes	Yes	Yes
Baseline	04_001	13OCT15	12:25:00	LYMLE	Lymphocytes	Hematology	40	%	20	50		40	%	20	50		Normal				N		Baseline			40	Normal		04	Entered	49	Female	13OCT15	124	Placebo	>=250 mg/day	Yes	No	>=250 mg/day	No	Yes	Yes	Yes	Yes
Baseline	04_001	13OCT15	12:25:00	MONO	Abs Monocytes	Hematology	0.6	K/uL	0	0.9		0.6	K/uL	0	0.9		Normal				N		Baseline			0.6	Normal		04	Entered	49	Female	13OCT15	124	Placebo	>=250 mg/day	Yes	No	>=250 mg/day	No	Yes	Yes	Yes	Yes
Baseline	04_001	13OCT15	12:25:00	MONOLE	Monocytes	Hematology	7	%	1	9		7	%	1	9		Normal				N		Baseline			7	Normal		04	Entered	49	Female	13OCT15	124	Placebo	>=250 mg/day	Yes	No	>=250 mg/day	No	Yes	Yes	Yes	Yes
Baseline	04_001	13OCT15	12:25:00	NEUT	Abs Neutrophil	Hematology	4.4	K/uL	1.5	7.7		4.4	K/uL	1.5	7.7		Normal				N		Baseline			4.4	Normal		04	Entered	49	Female	13OCT15	124	Placebo	>=250 mg/day	Yes	No	>=250 mg/day	No	Yes	Yes	Yes	Yes
Baseline	04_001	13OCT15	12:25:00	NEUTLE	Neutrophils	Hematology	50	%	45	79		50	%	45	79		Normal				N		Baseline			50	Normal		04	Entered	49	Female	13OCT15	124	Placebo	>=250 mg/day	Yes	No	>=250 mg/day	No	Yes	Yes	Yes	Yes
Baseline	04_001	13OCT15	12:25:00	PLAT	Platelet Count	Hematology	182	K/uL	150	450		182	K/uL	150	450		Normal				N		Baseline			182	Normal		04	Entered	49	Female	13OCT15	124	Placebo	>=250 mg/day	Yes	No	>=250 mg/day	No	Yes	Yes	Yes	Yes
Baseline	04_001	13OCT15	12:25:00	RBC	RBC	Hematology	4.68	M/uL	3.7	5.2		4.68	M/uL	3.7	5.2		Normal				N		Baseline			4.68	Normal		04	Entered	49	Female	13OCT15	124	Placebo	>=250 mg/day	Yes	No	>=250 mg/day	No	Yes	Yes	Yes	Yes
Baseline	04_001	13OCT15	12:25:00	SODIUM	Sodium	Chemistry	135	mmol/L	136	145		135	mmol/L	136	145		Low				N		Baseline			135	Low		04	Entered	49	Female	13OCT15	124	Placebo	>=250 mg/day	Yes	No	>=250 mg/day	No	Yes	Yes	Yes	Yes
Baseline	04_001	13OCT15	12:25:00	TRIG	Triglycerides	Chemistry	326	mg/dL		150		326	mg/dL		150		High				N		Baseline			326	High		04	Entered	49	Female	13OCT15	124	Placebo	>=250 mg/day	Yes	No	>=250 mg/day	No	Yes	Yes	Yes	Yes
Baseline	04_001	13OCT15	12:25:00	WBC	WBC	Hematology	8.8	K/uL	4	11		8.8	K/uL	4	11		Normal				N		Baseline			8.8	Normal		04	Entered	49	Female	13OCT15	124	Placebo	>=250 mg/day	Yes	No	>=250 mg/day	No	Yes	Yes	Yes	Yes
Week 12	04_001	08JAN16	9:55:00	ALP	Alkaline Phosphatase	Liver Function Tests	127	IU/L	32	92		127	IU/L	32	92		High				N		Week 12			270	High	-143	04	Entered	49	Female	13OCT15	124	Placebo	>=250 mg/day	Yes	No	>=250 mg/day	No	Yes	Yes	Yes	Yes
Week 12	04_001	08JAN16	9:55:00	ALT	ALT	Liver Function Tests	148	IU/L	14	54		148	IU/L	14	54		High				N		Week 12			110	High	38	04	Entered	49	Female	13OCT15	124	Placebo	>=250 mg/day	Yes	No	>=250 mg/day	No	Yes	Yes	Yes	Yes
Week 12	04_001	08JAN16	9:55:00	AST	AST	Liver Function Tests	92	IU/L	15	41		92	IU/L	15	41		High				N		Week 12			51	High	41	04	Entered	49	Female	13OCT15	124	Placebo	>=250 mg/day	Yes	No	>=250 mg/day	No	Yes	Yes	Yes	Yes
Week 12	04_001	08JAN16	9:55:00	BASO	Abs Basophils	Hematology	0.1	K/uL	0	0.2		0.1	K/uL	0	0.2		Normal				N		Week 12			0.1	Normal	0	04	Entered	49	Female	13OCT15	124	Placebo	>=250 mg/day	Yes	No	>=250 mg/day	No	Yes	Yes	Yes	Yes
Week 12	04_001	08JAN16	9:55:00	BASOLE	Basophils	Hematology	1	%	0	2		1	%	0	2		Normal				N		Week 12			1	Normal	0	04	Entered	49	Female	13OCT15	124	Placebo	>=250 mg/day	Yes	No	>=250 mg/day	No	Yes	Yes	Yes	Yes
Week 12	04_001	08JAN16	9:55:00	BILIT	Bilirubin Total	Liver Function Tests	0.5	mg/dL	0.3	1.2		0.5	mg/dL	0.3	1.2		Normal				N		Week 12			0.3	Normal	0.2	04	Entered	49	Female	13OCT15	124	Placebo	>=250 mg/day	Yes	No	>=250 mg/day	No	Yes	Yes	Yes	Yes
Week 12	04_001	08JAN16	9:55:00	EOS	Abs Eosinophils	Hematology	0.2	K/uL	0	0.6		0.2	K/uL	0	0.6		Normal				N		Week 12			0.2	Normal	0	04	Entered	49	Female	13OCT15	124	Placebo	>=250 mg/day	Yes	No	>=250 mg/day	No	Yes	Yes	Yes	Yes
Week 12	04_001	08JAN16	9:55:00	EOSLE	Eosinophils	Hematology	2	%	0	4		2	%	0	4		Normal				N		Week 12			2	Normal	0	04	Entered	49	Female	13OCT15	124	Placebo	>=250 mg/day	Yes	No	>=250 mg/day	No	Yes	Yes	Yes	Yes
Week 12	04_001	08JAN16	9:55:00	GGT	GGT	Liver Function Tests	49	IU/L	7	50		49	IU/L	7	50		Normal				N		Week 12			48	Normal	1	04	Entered	49	Female	13OCT15	124	Placebo	>=250 mg/day	Yes	No	>=250 mg/day	No	Yes	Yes	Yes	Yes
Week 12	04_001	08JAN16	9:55:00	HCT	Hematocrit	Hematology	46.7	%	36	46		46.7	%	36	46		High				N		Week 12			42	Normal	4.7	04	Entered	49	Female	13OCT15	124	Placebo	>=250 mg/day	Yes	No	>=250 mg/day	No	Yes	Yes	Yes	Yes
Week 12	04_001	08JAN16	9:55:00	HGB	Hemoglobin	Hematology	15.2	g/dL	12	15.5		15.2	g/dL	12	15.5		Normal				N		Week 12			14.1	Normal	1.1	04	Entered	49	Female	13OCT15	124	Placebo	>=250 mg/day	Yes	No	>=250 mg/day	No	Yes	Yes	Yes	Yes
Week 12	04_001	08JAN16	9:55:00	LYM	Abs Lymphocytes	Hematology	3.2	K/uL	0.8	4		3.2	K/uL	0.8	4		Normal				N		Week 12			3.5	Normal	-0.3	04	Entered	49	Female	13OCT15	124	Placebo	>=250 mg/day	Yes	No	>=250 mg/day	No	Yes	Yes	Yes	Yes
Week 12	04_001	08JAN16	9:55:00	LYMLE	Lymphocytes	Hematology	40	%	20	50		40	%	20	50		Normal				N		Week 12			40	Normal	0	04	Entered	49	Female	13OCT15	124	Placebo	>=250 mg/day	Yes	No	>=250 mg/day	No	Yes	Yes	Yes	Yes
Week 12	04_001	08JAN16	9:55:00	MONO	Abs Monocytes	Hematology	0.5	K/uL	0	0.9		0.5	K/uL	0	0.9		Normal				N		Week 12			0.6	Normal	-0.1	04	Entered	49	Female	13OCT15	124	Placebo	>=250 mg/day	Yes	No	>=250 mg/day	No	Yes	Yes	Yes	Yes
Week 12	04_001	08JAN16	9:55:00	MONOLE	Monocytes	Hematology	6	%	1	9		6	%	1	9		Normal				N		Week 12			7	Normal	-1	04	Entered	49	Female	13OCT15	124	Placebo	>=250 mg/day	Yes	No	>=250 mg/day	No	Yes	Yes	Yes	Yes
Week 12	04_001	08JAN16	9:55:00	NEUT	Abs Neutrophil	Hematology	4.1	K/uL	1.5	7.7		4.1	K/uL	1.5	7.7		Normal				N		Week 12			4.4	Normal	-0.3	04	Entered	49	Female	13OCT15	124	Placebo	>=250 mg/day	Yes	No	>=250 mg/day	No	Yes	Yes	Yes	Yes
Week 12	04_001	08JAN16	9:55:00	NEUTLE	Neutrophils	Hematology	51	%	45	79		51	%	45	79		Normal				N		Week 12			50	Normal	1	04	Entered	49	Female	13OCT15	124	Placebo	>=250 mg/day	Yes	No	>=250 mg/day	No	Yes	Yes	Yes	Yes
Week 12	04_001	08JAN16	9:55:00	PLAT	Platelet Count	Hematology	203	K/uL	150	450		203	K/uL	150	450		Normal				N		Week 12			182	Normal	21	04	Entered	49	Female	13OCT15	124	Placebo	>=250 mg/day	Yes	No	>=250 mg/day	No	Yes	Yes	Yes	Yes
Week 12	04_001	08JAN16	9:55:00	RBC	RBC	Hematology	5.16	M/uL	3.7	5.2		5.16	M/uL	3.7	5.2		Normal				N		Week 12			4.68	Normal	0.48	04	Entered	49	Female	13OCT15	124	Placebo	>=250 mg/day	Yes	No	>=250 mg/day	No	Yes	Yes	Yes	Yes
Week 12	04_001	08JAN16	9:55:00	WBC	WBC	Hematology	8.1	K/uL	4	11		8.1	K/uL	4	11		Normal				N		Week 12			8.8	Normal	-0.7	04	Entered	49	Female	13OCT15	124	Placebo	>=250 mg/day	Yes	No	>=250 mg/day	No	Yes	Yes	Yes	Yes
Week 24	04_001	01APR16	10:40:00	ALB	Albumin	Chemistry	4.2	g/dL	3.5	5.2		4.2	g/dL	3.5	5.2		Normal				N		Week 24			4.4	Normal	-0.2	04	Entered	49	Female	13OCT15	124	Placebo	>=250 mg/day	Yes	No	>=250 mg/day	No	Yes	Yes	Yes	Yes
Week 24	04_001	01APR16	10:40:00	ALP	Alkaline Phosphatase	Liver Function Tests	136	IU/L	32	92		136	IU/L	32	92		High				N		Week 24			270	High	-134	04	Entered	49	Female	13OCT15	124	Placebo	>=250 mg/day	Yes	No	>=250 mg/day	No	Yes	Yes	Yes	Yes
Week 24	04_001	01APR16	10:40:00	ALT	ALT	Liver Function Tests	59	IU/L	14	54		59	IU/L	14	54		High				N		Week 24			110	High	-51	04	Entered	49	Female	13OCT15	124	Placebo	>=250 mg/day	Yes	No	>=250 mg/day	No	Yes	Yes	Yes	Yes
Week 24	04_001	01APR16	10:40:00	AST	AST	Liver Function Tests	31	IU/L	15	41		31	IU/L	15	41		Normal				N		Week 24			51	High	-20	04	Entered	49	Female	13OCT15	124	Placebo	>=250 mg/day	Yes	No	>=250 mg/day	No	Yes	Yes	Yes	Yes
Week 24	04_001	01APR16	10:40:00	BASO	Abs Basophils	Hematology	0.1	K/uL	0	0.2		0.1	K/uL	0	0.2		Normal				N		Week 24			0.1	Normal	0	04	Entered	49	Female	13OCT15	124	Placebo	>=250 mg/day	Yes	No	>=250 mg/day	No	Yes	Yes	Yes	Yes
Week 24	04_001	01APR16	10:40:00	BASOLE	Basophils	Hematology	1	%	0	2		1	%	0	2		Normal				N		Week 24			1	Normal	0	04	Entered	49	Female	13OCT15	124	Placebo	>=250 mg/day	Yes	No	>=250 mg/day	No	Yes	Yes	Yes	Yes
Week 24	04_001	01APR16	10:40:00	BICARB	BiCarbonate (CO2)	Chemistry	21	mmol/L	22	32		21	mmol/L	22	32		Low				N		Week 24			22	Normal	-1	04	Entered	49	Female	13OCT15	124	Placebo	>=250 mg/day	Yes	No	>=250 mg/day	No	Yes	Yes	Yes	Yes
Week 24	04_001	01APR16	10:40:00	BILIT	Bilirubin Total	Liver Function Tests	0.3	mg/dL	0.3	1.2		0.3	mg/dL	0.3	1.2		Normal				N		Week 24			0.3	Normal	0	04	Entered	49	Female	13OCT15	124	Placebo	>=250 mg/day	Yes	No	>=250 mg/day	No	Yes	Yes	Yes	Yes
Week 24	04_001	01APR16	10:40:00	BUN	BUN (urea)	Chemistry	18	mg/dL	6	20		18	mg/dL	6	20		Normal				N		Week 24			17	Normal	1	04	Entered	49	Female	13OCT15	124	Placebo	>=250 mg/day	Yes	No	>=250 mg/day	No	Yes	Yes	Yes	Yes
Week 24	04_001	01APR16	10:40:00	CA	Calcium	Chemistry	9.8	mg/dL	8.6	10		9.8	mg/dL	8.6	10		Normal				N		Week 24			9.6	Normal	0.2	04	Entered	49	Female	13OCT15	124	Placebo	>=250 mg/day	Yes	No	>=250 mg/day	No	Yes	Yes	Yes	Yes
Week 24	04_001	01APR16	10:40:00	CL	Chloride	Chemistry	98	mmol/L	98	107		98	mmol/L	98	107		Normal				N		Week 24			99	Normal	-1	04	Entered	49	Female	13OCT15	124	Placebo	>=250 mg/day	Yes	No	>=250 mg/day	No	Yes	Yes	Yes	Yes
Week 24	04_001	01APR16	10:40:00	CREAT	Creatinine	Chemistry	0.7	mg/dL	0.6	1.1		0.7	mg/dL	0.6	1.1		Normal				N		Week 24			0.8	Normal	-0.1	04	Entered	49	Female	13OCT15	124	Placebo	>=250 mg/day	Yes	No	>=250 mg/day	No	Yes	Yes	Yes	Yes
Week 24	04_001	01APR16	10:40:00	CRPHS	hs-CRP	hs-CRP	5.31	mg/L				5.31	mg/L				Normal				N	hs-CRP CHD risk level: low risk <1.0 mg/L intermediate risk 1.0-3.0 mg/L high risk >3.0 mg/L Values >10 mg/L suggests an inflammatory disorder requiring separate evaluation. Cardiac risk assessment is not appropriate in this context.	Week 24			3.42	Normal	1.89	04	Entered	49	Female	13OCT15	124	Placebo	>=250 mg/day	Yes	No	>=250 mg/day	No	Yes	Yes	Yes	Yes
Week 24	04_001	01APR16	10:40:00	EOS	Abs Eosinophils	Hematology	0.1	K/uL	0	0.6		0.1	K/uL	0	0.6		Normal				N		Week 24			0.2	Normal	-0.1	04	Entered	49	Female	13OCT15	124	Placebo	>=250 mg/day	Yes	No	>=250 mg/day	No	Yes	Yes	Yes	Yes
Week 24	04_001	01APR16	10:40:00	EOSLE	Eosinophils	Hematology	1	%	0	4		1	%	0	4		Normal				N		Week 24			2	Normal	-1	04	Entered	49	Female	13OCT15	124	Placebo	>=250 mg/day	Yes	No	>=250 mg/day	No	Yes	Yes	Yes	Yes
Week 24	04_001	01APR16	10:40:00	GGT	GGT	Liver Function Tests	33	IU/L	7	50		33	IU/L	7	50		Normal				N		Week 24			48	Normal	-15	04	Entered	49	Female	13OCT15	124	Placebo	>=250 mg/day	Yes	No	>=250 mg/day	No	Yes	Yes	Yes	Yes
Week 24	04_001	01APR16	10:40:00	GLUC	Glucose Random	Chemistry	407	mg/dL	70	139		407	mg/dL	70	139		High				N		Week 24			383	High	24	04	Entered	49	Female	13OCT15	124	Placebo	>=250 mg/day	Yes	No	>=250 mg/day	No	Yes	Yes	Yes	Yes
Week 24	04_001	01APR16	10:40:00	HBA1C	HbA1c	HbA1c	11.7	%	4	5.6		11.7	%	4	5.6		High				N	INTERPRETIVE INFORMATION: Hemoglobin A1cHemoglobin A1c values of 5.7-6.4 percent indicate an increasedrisk for developing diabetes mellitus. Hemoglobin A1c valuesgreater than or equal to 6.5 percent are diagnostic of diabetesmellitus. Diagnosis should be confirmed by repeating the Hb A1ctest.This boronate affinity Hb A1c method provides accurate analyticalresults in the presence of nearly all hem…	Week 24			10.6	High	1.1	04	Entered	49	Female	13OCT15	124	Placebo	>=250 mg/day	Yes	No	>=250 mg/day	No	Yes	Yes	Yes	Yes
Week 24	04_001	01APR16	10:40:00	HCT	Hematocrit	Hematology	42.0	%	36	46		42	%	36	46		Normal				N		Week 24			42	Normal	0	04	Entered	49	Female	13OCT15	124	Placebo	>=250 mg/day	Yes	No	>=250 mg/day	No	Yes	Yes	Yes	Yes
Week 24	04_001	01APR16	10:40:00	HGB	Hemoglobin	Hematology	14.1	g/dL	12	15.5		14.1	g/dL	12	15.5		Normal				N		Week 24			14.1	Normal	0	04	Entered	49	Female	13OCT15	124	Placebo	>=250 mg/day	Yes	No	>=250 mg/day	No	Yes	Yes	Yes	Yes
Week 24	04_001	01APR16	10:40:00	INSULIN	Insulin	Insulin	31.3	uIU/mL	1.9	23		31.3	uIU/mL	1.9	23		High				N		Week 24			82.8	High	-51.5	04	Entered	49	Female	13OCT15	124	Placebo	>=250 mg/day	Yes	No	>=250 mg/day	No	Yes	Yes	Yes	Yes
Week 24	04_001	01APR16	10:40:00	K	Potassium	Chemistry	4.0	mmol/L	3.5	5.1		4	mmol/L	3.5	5.1		Normal				N		Week 24			4	Normal	0	04	Entered	49	Female	13OCT15	124	Placebo	>=250 mg/day	Yes	No	>=250 mg/day	No	Yes	Yes	Yes	Yes
Week 24	04_001	01APR16	10:40:00	LYM	Abs Lymphocytes	Hematology	3.3	K/uL	0.8	4		3.3	K/uL	0.8	4		Normal				N		Week 24			3.5	Normal	-0.2	04	Entered	49	Female	13OCT15	124	Placebo	>=250 mg/day	Yes	No	>=250 mg/day	No	Yes	Yes	Yes	Yes
Week 24	04_001	01APR16	10:40:00	LYMLE	Lymphocytes	Hematology	39	%	20	50		39	%	20	50		Normal				N		Week 24			40	Normal	-1	04	Entered	49	Female	13OCT15	124	Placebo	>=250 mg/day	Yes	No	>=250 mg/day	No	Yes	Yes	Yes	Yes
Week 24	04_001	01APR16	10:40:00	MONO	Abs Monocytes	Hematology	0.4	K/uL	0	0.9		0.4	K/uL	0	0.9		Normal				N		Week 24			0.6	Normal	-0.2	04	Entered	49	Female	13OCT15	124	Placebo	>=250 mg/day	Yes	No	>=250 mg/day	No	Yes	Yes	Yes	Yes
Week 24	04_001	01APR16	10:40:00	MONOLE	Monocytes	Hematology	5	%	1	9		5	%	1	9		Normal				N		Week 24			7	Normal	-2	04	Entered	49	Female	13OCT15	124	Placebo	>=250 mg/day	Yes	No	>=250 mg/day	No	Yes	Yes	Yes	Yes
Week 24	04_001	01APR16	10:40:00	NEUT	Abs Neutrophil	Hematology	4.5	K/uL	1.5	7.7		4.5	K/uL	1.5	7.7		Normal				N		Week 24			4.4	Normal	0.1	04	Entered	49	Female	13OCT15	124	Placebo	>=250 mg/day	Yes	No	>=250 mg/day	No	Yes	Yes	Yes	Yes
Week 24	04_001	01APR16	10:40:00	NEUTLE	Neutrophils	Hematology	54	%	45	79		54	%	45	79		Normal				N		Week 24			50	Normal	4	04	Entered	49	Female	13OCT15	124	Placebo	>=250 mg/day	Yes	No	>=250 mg/day	No	Yes	Yes	Yes	Yes
Week 24	04_001	01APR16	10:40:00	PLAT	Platelet Count	Hematology	176	K/uL	150	450		176	K/uL	150	450		Normal				N		Week 24			182	Normal	-6	04	Entered	49	Female	13OCT15	124	Placebo	>=250 mg/day	Yes	No	>=250 mg/day	No	Yes	Yes	Yes	Yes
Week 24	04_001	01APR16	10:40:00	RBC	RBC	Hematology	4.63	M/uL	3.7	5.2		4.63	M/uL	3.7	5.2		Normal				N		Week 24			4.68	Normal	-0.05	04	Entered	49	Female	13OCT15	124	Placebo	>=250 mg/day	Yes	No	>=250 mg/day	No	Yes	Yes	Yes	Yes
Week 24	04_001	01APR16	10:40:00	SODIUM	Sodium	Chemistry	132	mmol/L	136	145		132	mmol/L	136	145		Low				N		Week 24			135	Low	-3	04	Entered	49	Female	13OCT15	124	Placebo	>=250 mg/day	Yes	No	>=250 mg/day	No	Yes	Yes	Yes	Yes
Week 24	04_001	01APR16	10:40:00	TRIG	Triglycerides	Chemistry	220	mg/dL		150		220	mg/dL		150		High				N		Week 24			326	High	-106	04	Entered	49	Female	13OCT15	124	Placebo	>=250 mg/day	Yes	No	>=250 mg/day	No	Yes	Yes	Yes	Yes
Week 24	04_001	01APR16	10:40:00	TSH	TSH	TSH	1.22	uIU/mL	0.34	5.6		1.22	uIU/mL	0.34	5.6		Normal				N		Week 24			0.98	Normal	0.24	04	Entered	49	Female	13OCT15	124	Placebo	>=250 mg/day	Yes	No	>=250 mg/day	No	Yes	Yes	Yes	Yes
Week 24	04_001	01APR16	10:40:00	WBC	WBC	Hematology	8.4	K/uL	4	11		8.4	K/uL	4	11		Normal				N		Week 24			8.8	Normal	-0.4	04	Entered	49	Female	13OCT15	124	Placebo	>=250 mg/day	Yes	No	>=250 mg/day	No	Yes	Yes	Yes	Yes
Screening	04_002	07OCT15	11:03:00	ALP	Alkaline Phosphatase	Liver Function Tests	219	IU/L	32	92		219	IU/L	32	92		High				N		Screening			219	High		04	Screen Failure	56	Male							<250 mg/day	Yes	No	No	No	No
Screening	04_002	07OCT15	11:03:00	ALT	ALT	Liver Function Tests	48	IU/L	17	63		48	IU/L	17	63		Normal				N		Screening			48	Normal		04	Screen Failure	56	Male							<250 mg/day	Yes	No	No	No	No
Screening	04_002	07OCT15	11:03:00	AST	AST	Liver Function Tests	55	IU/L	15	41		55	IU/L	15	41		High				N		Screening			55	High		04	Screen Failure	56	Male							<250 mg/day	Yes	No	No	No	No
Screening	04_002	07OCT15	11:03:00	BILIT	Bilirubin Total	Liver Function Tests	1.4	mg/dL	0.3	1.2		1.4	mg/dL	0.3	1.2		High				N		Screening			1.4	High		04	Screen Failure	56	Male							<250 mg/day	Yes	No	No	No	No
Screening	04_002	07OCT15	11:03:00	GGT	GGT	Liver Function Tests	462	IU/L	7	50		462	IU/L	7	50		High				N		Screening			462	High		04	Screen Failure	56	Male							<250 mg/day	Yes	No	No	No	No
Screening	04_002	07OCT15	11:03:00	HBA1C	HbA1c	HbA1c	9.2	%	4	5.6		9.2	%	4	5.6		High				N	INTERPRETIVE INFORMATION: Hemoglobin A1cHemoglobin A1c values of 5.7-6.4 percent indicate an increasedrisk for developing diabetes mellitus. Hemoglobin A1c valuesgreater than or equal to 6.5 percent are diagnostic of diabetesmellitus. Diagnosis should be confirmed by repeating the Hb A1ctest.This boronate affinity Hb A1c method provides accurate analyticalresults in the presence of nearly all hem…	Screening			9.2	High		04	Screen Failure	56	Male							<250 mg/day	Yes	No	No	No	No
Screening	04_002	07OCT15	11:03:00	HCAB	Hepatitis C Antibody	Hepatitis C Antibody	NONREACT				NONREACT					NONREACT					N		Screening						04	Screen Failure	56	Male							<250 mg/day	Yes	No	No	No	No
Screening	04_002	07OCT15	11:03:00	TSH	TSH	TSH	0.88	uIU/mL	0.34	5.6		0.88	uIU/mL	0.34	5.6		Normal				N		Screening			0.88	Normal		04	Screen Failure	56	Male							<250 mg/day	Yes	No	No	No	No
Screening	04_003	07OCT15	14:20:00	ALP	Alkaline Phosphatase	Liver Function Tests	438	IU/L	32	92		438	IU/L	32	92		High				N		Screening			438	High		04	Screen Failure	35	Female							<250 mg/day	Yes	No	No	No	No
Screening	04_003	07OCT15	14:20:00	ALT	ALT	Liver Function Tests	90	IU/L	14	54		90	IU/L	14	54		High				N		Screening			90	High		04	Screen Failure	35	Female							<250 mg/day	Yes	No	No	No	No
Screening	04_003	07OCT15	14:20:00	AST	AST	Liver Function Tests	98	IU/L	15	41		98	IU/L	15	41		High				N		Screening			98	High		04	Screen Failure	35	Female							<250 mg/day	Yes	No	No	No	No
Screening	04_003	07OCT15	14:20:00	BILIT	Bilirubin Total	Liver Function Tests	0.5	mg/dL	0.3	1.2		0.5	mg/dL	0.3	1.2		Normal				N		Screening			0.5	Normal		04	Screen Failure	35	Female							<250 mg/day	Yes	No	No	No	No
Screening	04_003	07OCT15	14:20:00	GGT	GGT	Liver Function Tests	271	IU/L	7	50		271	IU/L	7	50		High				N		Screening			271	High		04	Screen Failure	35	Female							<250 mg/day	Yes	No	No	No	No
Screening	04_003	07OCT15	14:20:00	HBA1C	HbA1c	HbA1c	5.2	%	4	5.6		5.2	%	4	5.6		Normal				N	INTERPRETIVE INFORMATION: Hemoglobin A1cHemoglobin A1c values of 5.7-6.4 percent indicate an increasedrisk for developing diabetes mellitus. Hemoglobin A1c valuesgreater than or equal to 6.5 percent are diagnostic of diabetesmellitus. Diagnosis should be confirmed by repeating the Hb A1ctest.This boronate affinity Hb A1c method provides accurate analyticalresults in the presence of nearly all hem…	Screening			5.2	Normal		04	Screen Failure	35	Female							<250 mg/day	Yes	No	No	No	No
Screening	04_003	07OCT15	14:20:00	HCAB	Hepatitis C Antibody	Hepatitis C Antibody	NONREACT				NONREACT					NONREACT					N		Screening						04	Screen Failure	35	Female							<250 mg/day	Yes	No	No	No	No
Screening	04_003	07OCT15	14:20:00	TSH	TSH	TSH	0.91	uIU/mL	0.34	5.6		0.91	uIU/mL	0.34	5.6		Normal				N		Screening			0.91	Normal		04	Screen Failure	35	Female							<250 mg/day	Yes	No	No	No	No
Screening	04_004	09OCT15	11:12:00	ALP	Alkaline Phosphatase	Liver Function Tests	61	IU/L	32	92		61	IU/L	32	92		Normal				N		Screening			61	Normal		04	Entered	34	Male	15OCT15	125	MF4637	<250 mg/day	No	No	<250 mg/day	No	Yes	Yes	Yes	No
Screening	04_004	09OCT15	11:12:00	ALT	ALT	Liver Function Tests	148	IU/L	17	63		148	IU/L	17	63		High				N		Screening			146	High		04	Entered	34	Male	15OCT15	125	MF4637	<250 mg/day	No	No	<250 mg/day	No	Yes	Yes	Yes	No
Screening	04_004	09OCT15	11:12:00	AST	AST	Liver Function Tests	86	IU/L	15	41		86	IU/L	15	41		High				N		Screening			97	High		04	Entered	34	Male	15OCT15	125	MF4637	<250 mg/day	No	No	<250 mg/day	No	Yes	Yes	Yes	No
Screening	04_004	09OCT15	11:12:00	BILIT	Bilirubin Total	Liver Function Tests	0.6	mg/dL	0.3	1.2		0.6	mg/dL	0.3	1.2		Normal				N		Screening			0.7	Normal		04	Entered	34	Male	15OCT15	125	MF4637	<250 mg/day	No	No	<250 mg/day	No	Yes	Yes	Yes	No
Screening	04_004	09OCT15	11:12:00	GGT	GGT	Liver Function Tests	128	IU/L	7	50		128	IU/L	7	50		High				N		Screening			136	High		04	Entered	34	Male	15OCT15	125	MF4637	<250 mg/day	No	No	<250 mg/day	No	Yes	Yes	Yes	No
Screening	04_004	09OCT15	11:12:00	HBA1C	HbA1c	HbA1c	5.3	%	4	5.6		5.3	%	4	5.6		Normal				N	INTERPRETIVE INFORMATION: Hemoglobin A1cHemoglobin A1c values of 5.7-6.4 percent indicate an increasedrisk for developing diabetes mellitus. Hemoglobin A1c valuesgreater than or equal to 6.5 percent are diagnostic of diabetesmellitus. Diagnosis should be confirmed by repeating the Hb A1ctest.This boronate affinity Hb A1c method provides accurate analyticalresults in the presence of nearly all hem…	Screening			5.3	Normal		04	Entered	34	Male	15OCT15	125	MF4637	<250 mg/day	No	No	<250 mg/day	No	Yes	Yes	Yes	No
Screening	04_004	09OCT15	11:12:00	HCAB	Hepatitis C Antibody	Hepatitis C Antibody	NONREACT				NONREACT					NONREACT					N		Screening						04	Entered	34	Male	15OCT15	125	MF4637	<250 mg/day	No	No	<250 mg/day	No	Yes	Yes	Yes	No
Screening	04_004	09OCT15	11:12:00	TSH	TSH	TSH	1.40	uIU/mL	0.34	5.6		1.4	uIU/mL	0.34	5.6		Normal				N		Screening			1.4	Normal		04	Entered	34	Male	15OCT15	125	MF4637	<250 mg/day	No	No	<250 mg/day	No	Yes	Yes	Yes	No
Baseline	04_004	14OCT15	11:05:00	ALB	Albumin	Chemistry	5.0	g/dL	3.5	5.2		5	g/dL	3.5	5.2		Normal				Y		Baseline			5	Normal		04	Entered	34	Male	15OCT15	125	MF4637	<250 mg/day	No	No	<250 mg/day	No	Yes	Yes	Yes	No
Baseline	04_004	14OCT15	11:05:00	ALP	Alkaline Phosphatase	Liver Function Tests	61	IU/L	32	92		61	IU/L	32	92		Normal				Y		Baseline			61	Normal		04	Entered	34	Male	15OCT15	125	MF4637	<250 mg/day	No	No	<250 mg/day	No	Yes	Yes	Yes	No
Baseline	04_004	14OCT15	11:05:00	ALT	ALT	Liver Function Tests	146	IU/L	17	63		146	IU/L	17	63		High				Y		Baseline			146	High		04	Entered	34	Male	15OCT15	125	MF4637	<250 mg/day	No	No	<250 mg/day	No	Yes	Yes	Yes	No
Baseline	04_004	14OCT15	11:05:00	AST	AST	Liver Function Tests	97	IU/L	15	41		97	IU/L	15	41		High				Y		Baseline			97	High		04	Entered	34	Male	15OCT15	125	MF4637	<250 mg/day	No	No	<250 mg/day	No	Yes	Yes	Yes	No
Baseline	04_004	14OCT15	11:05:00	BASO	Abs Basophils	Hematology	0.1	K/uL	0	0.2		0.1	K/uL	0	0.2		Normal				Y		Baseline			0.1	Normal		04	Entered	34	Male	15OCT15	125	MF4637	<250 mg/day	No	No	<250 mg/day	No	Yes	Yes	Yes	No
Baseline	04_004	14OCT15	11:05:00	BASOLE	Basophils	Hematology	1	%	0	2		1	%	0	2		Normal				Y		Baseline			1	Normal		04	Entered	34	Male	15OCT15	125	MF4637	<250 mg/day	No	No	<250 mg/day	No	Yes	Yes	Yes	No
Baseline	04_004	14OCT15	11:05:00	BICARB	BiCarbonate (CO2)	Chemistry	24	mmol/L	22	32		24	mmol/L	22	32		Normal				Y		Baseline			24	Normal		04	Entered	34	Male	15OCT15	125	MF4637	<250 mg/day	No	No	<250 mg/day	No	Yes	Yes	Yes	No
Baseline	04_004	14OCT15	11:05:00	BILIT	Bilirubin Total	Liver Function Tests	0.7	mg/dL	0.3	1.2		0.7	mg/dL	0.3	1.2		Normal				Y		Baseline			0.7	Normal		04	Entered	34	Male	15OCT15	125	MF4637	<250 mg/day	No	No	<250 mg/day	No	Yes	Yes	Yes	No
Baseline	04_004	14OCT15	11:05:00	BUN	BUN (urea)	Chemistry	13	mg/dL	6	20		13	mg/dL	6	20		Normal				Y		Baseline			13	Normal		04	Entered	34	Male	15OCT15	125	MF4637	<250 mg/day	No	No	<250 mg/day	No	Yes	Yes	Yes	No
Baseline	04_004	14OCT15	11:05:00	CA	Calcium	Chemistry	9.9	mg/dL	8.6	10		9.9	mg/dL	8.6	10		Normal				Y		Baseline			9.9	Normal		04	Entered	34	Male	15OCT15	125	MF4637	<250 mg/day	No	No	<250 mg/day	No	Yes	Yes	Yes	No
Baseline	04_004	14OCT15	11:05:00	CL	Chloride	Chemistry	99	mmol/L	98	107		99	mmol/L	98	107		Normal				Y		Baseline			99	Normal		04	Entered	34	Male	15OCT15	125	MF4637	<250 mg/day	No	No	<250 mg/day	No	Yes	Yes	Yes	No
Baseline	04_004	14OCT15	11:05:00	CREAT	Creatinine	Chemistry	0.8	mg/dL	0.9	1.3		0.8	mg/dL	0.9	1.3		Low				Y		Baseline			0.8	Low		04	Entered	34	Male	15OCT15	125	MF4637	<250 mg/day	No	No	<250 mg/day	No	Yes	Yes	Yes	No
Baseline	04_004	14OCT15	11:05:00	CRPHS	hs-CRP	hs-CRP	1.85	mg/L				1.85	mg/L				Normal				Y	hs-CRP CHD risk level: low risk <1.0 mg/L intermediate risk 1.0-3.0 mg/L high risk >3.0 mg/L Values >10 mg/L suggests an inflammatory disorder requiring separate evaluation. Cardiac risk assessment is not appropriate in this context.	Baseline			1.85	Normal		04	Entered	34	Male	15OCT15	125	MF4637	<250 mg/day	No	No	<250 mg/day	No	Yes	Yes	Yes	No
Baseline	04_004	14OCT15	11:05:00	EOS	Abs Eosinophils	Hematology	0.1	K/uL	0	0.6		0.1	K/uL	0	0.6		Normal				Y		Baseline			0.1	Normal		04	Entered	34	Male	15OCT15	125	MF4637	<250 mg/day	No	No	<250 mg/day	No	Yes	Yes	Yes	No
Baseline	04_004	14OCT15	11:05:00	EOSLE	Eosinophils	Hematology	2	%	0	4		2	%	0	4		Normal				Y		Baseline			2	Normal		04	Entered	34	Male	15OCT15	125	MF4637	<250 mg/day	No	No	<250 mg/day	No	Yes	Yes	Yes	No
Baseline	04_004	14OCT15	11:05:00	GGT	GGT	Liver Function Tests	136	IU/L	7	50		136	IU/L	7	50		High				Y		Baseline			136	High		04	Entered	34	Male	15OCT15	125	MF4637	<250 mg/day	No	No	<250 mg/day	No	Yes	Yes	Yes	No
Baseline	04_004	14OCT15	11:05:00	GLUCF	Glucose Fasting	Chemistry	83	mg/dL	70	99		83	mg/dL	70	99		Normal				Y		Baseline			83	Normal		04	Entered	34	Male	15OCT15	125	MF4637	<250 mg/day	No	No	<250 mg/day	No	Yes	Yes	Yes	No
Baseline	04_004	14OCT15	11:05:00	HCT	Hematocrit	Hematology	47.5	%	38	53		47.5	%	38	53		Normal				Y		Baseline			47.5	Normal		04	Entered	34	Male	15OCT15	125	MF4637	<250 mg/day	No	No	<250 mg/day	No	Yes	Yes	Yes	No
Baseline	04_004	14OCT15	11:05:00	HGB	Hemoglobin	Hematology	15.8	g/dL	13.5	17.5		15.8	g/dL	13.5	17.5		Normal				Y		Baseline			15.8	Normal		04	Entered	34	Male	15OCT15	125	MF4637	<250 mg/day	No	No	<250 mg/day	No	Yes	Yes	Yes	No
Baseline	04_004	14OCT15	11:05:00	INSULIN	Insulin	Insulin	4.4	uIU/mL	1.9	23		4.4	uIU/mL	1.9	23		Normal				Y		Baseline			4.4	Normal		04	Entered	34	Male	15OCT15	125	MF4637	<250 mg/day	No	No	<250 mg/day	No	Yes	Yes	Yes	No
Baseline	04_004	14OCT15	11:05:00	K	Potassium	Chemistry	4.3	mmol/L	3.5	5.1		4.3	mmol/L	3.5	5.1		Normal				Y		Baseline			4.3	Normal		04	Entered	34	Male	15OCT15	125	MF4637	<250 mg/day	No	No	<250 mg/day	No	Yes	Yes	Yes	No
Baseline	04_004	14OCT15	11:05:00	LYM	Abs Lymphocytes	Hematology	1.7	K/uL	0.8	4		1.7	K/uL	0.8	4		Normal				Y		Baseline			1.7	Normal		04	Entered	34	Male	15OCT15	125	MF4637	<250 mg/day	No	No	<250 mg/day	No	Yes	Yes	Yes	No
Baseline	04_004	14OCT15	11:05:00	LYMLE	Lymphocytes	Hematology	30	%	20	50		30	%	20	50		Normal				Y		Baseline			30	Normal		04	Entered	34	Male	15OCT15	125	MF4637	<250 mg/day	No	No	<250 mg/day	No	Yes	Yes	Yes	No
Baseline	04_004	14OCT15	11:05:00	MONO	Abs Monocytes	Hematology	0.6	K/uL	0	0.9		0.6	K/uL	0	0.9		Normal				Y		Baseline			0.6	Normal		04	Entered	34	Male	15OCT15	125	MF4637	<250 mg/day	No	No	<250 mg/day	No	Yes	Yes	Yes	No
Baseline	04_004	14OCT15	11:05:00	MONOLE	Monocytes	Hematology	10	%	1	9		10	%	1	9		High				Y		Baseline			10	High		04	Entered	34	Male	15OCT15	125	MF4637	<250 mg/day	No	No	<250 mg/day	No	Yes	Yes	Yes	No
Baseline	04_004	14OCT15	11:05:00	NEUT	Abs Neutrophil	Hematology	3.3	K/uL	1.5	7.7		3.3	K/uL	1.5	7.7		Normal				Y		Baseline			3.3	Normal		04	Entered	34	Male	15OCT15	125	MF4637	<250 mg/day	No	No	<250 mg/day	No	Yes	Yes	Yes	No
Baseline	04_004	14OCT15	11:05:00	NEUTLE	Neutrophils	Hematology	57	%	45	79		57	%	45	79		Normal				Y		Baseline			57	Normal		04	Entered	34	Male	15OCT15	125	MF4637	<250 mg/day	No	No	<250 mg/day	No	Yes	Yes	Yes	No
Baseline	04_004	14OCT15	11:05:00	PLAT	Platelet Count	Hematology	247	K/uL	150	450		247	K/uL	150	450		Normal				Y		Baseline			247	Normal		04	Entered	34	Male	15OCT15	125	MF4637	<250 mg/day	No	No	<250 mg/day	No	Yes	Yes	Yes	No
Baseline	04_004	14OCT15	11:05:00	RBC	RBC	Hematology	4.93	M/uL	4.3	5.8		4.93	M/uL	4.3	5.8		Normal				Y		Baseline			4.93	Normal		04	Entered	34	Male	15OCT15	125	MF4637	<250 mg/day	No	No	<250 mg/day	No	Yes	Yes	Yes	No
Baseline	04_004	14OCT15	11:05:00	SODIUM	Sodium	Chemistry	136	mmol/L	136	145		136	mmol/L	136	145		Normal				Y		Baseline			136	Normal		04	Entered	34	Male	15OCT15	125	MF4637	<250 mg/day	No	No	<250 mg/day	No	Yes	Yes	Yes	No
Baseline	04_004	14OCT15	11:05:00	TRIG	Triglycerides	Chemistry	112	mg/dL		150		112	mg/dL		150		Normal				Y		Baseline			112	Normal		04	Entered	34	Male	15OCT15	125	MF4637	<250 mg/day	No	No	<250 mg/day	No	Yes	Yes	Yes	No
Baseline	04_004	14OCT15	11:05:00	WBC	WBC	Hematology	5.8	K/uL	4	11		5.8	K/uL	4	11		Normal				Y		Baseline			5.8	Normal		04	Entered	34	Male	15OCT15	125	MF4637	<250 mg/day	No	No	<250 mg/day	No	Yes	Yes	Yes	No
Week 12	04_004	08JAN16	9:03:00	ALP	Alkaline Phosphatase	Liver Function Tests	56	IU/L	32	92		56	IU/L	32	92		Normal				N		Week 12			61	Normal	-5	04	Entered	34	Male	15OCT15	125	MF4637	<250 mg/day	No	No	<250 mg/day	No	Yes	Yes	Yes	No
Week 12	04_004	08JAN16	9:03:00	ALT	ALT	Liver Function Tests	225	IU/L	17	63		225	IU/L	17	63		High				N		Week 12	Elevated	Yes	146	High	79	04	Entered	34	Male	15OCT15	125	MF4637	<250 mg/day	No	No	<250 mg/day	No	Yes	Yes	Yes	No
Week 12	04_004	08JAN16	9:03:00	AST	AST	Liver Function Tests	134	IU/L	15	41		134	IU/L	15	41		High				N		Week 12	and GGT elavated	Yes	97	High	37	04	Entered	34	Male	15OCT15	125	MF4637	<250 mg/day	No	No	<250 mg/day	No	Yes	Yes	Yes	No
Week 12	04_004	08JAN16	9:03:00	BASO	Abs Basophils	Hematology	0.1	K/uL	0	0.2		0.1	K/uL	0	0.2		Normal				N		Week 12			0.1	Normal	0	04	Entered	34	Male	15OCT15	125	MF4637	<250 mg/day	No	No	<250 mg/day	No	Yes	Yes	Yes	No
Week 12	04_004	08JAN16	9:03:00	BASOLE	Basophils	Hematology	1	%	0	2		1	%	0	2		Normal				N		Week 12			1	Normal	0	04	Entered	34	Male	15OCT15	125	MF4637	<250 mg/day	No	No	<250 mg/day	No	Yes	Yes	Yes	No
Week 12	04_004	08JAN16	9:03:00	BILIT	Bilirubin Total	Liver Function Tests	0.8	mg/dL	0.3	1.2		0.8	mg/dL	0.3	1.2		Normal				N		Week 12			0.7	Normal	0.1	04	Entered	34	Male	15OCT15	125	MF4637	<250 mg/day	No	No	<250 mg/day	No	Yes	Yes	Yes	No
Week 12	04_004	08JAN16	9:03:00	EOS	Abs Eosinophils	Hematology	0.2	K/uL	0	0.6		0.2	K/uL	0	0.6		Normal				N		Week 12			0.1	Normal	0.1	04	Entered	34	Male	15OCT15	125	MF4637	<250 mg/day	No	No	<250 mg/day	No	Yes	Yes	Yes	No
Week 12	04_004	08JAN16	9:03:00	EOSLE	Eosinophils	Hematology	3	%	0	4		3	%	0	4		Normal				N		Week 12			2	Normal	1	04	Entered	34	Male	15OCT15	125	MF4637	<250 mg/day	No	No	<250 mg/day	No	Yes	Yes	Yes	No
Week 12	04_004	08JAN16	9:03:00	GGT	GGT	Liver Function Tests	262	IU/L	7	50		262	IU/L	7	50		High				N		Week 12			136	High	126	04	Entered	34	Male	15OCT15	125	MF4637	<250 mg/day	No	No	<250 mg/day	No	Yes	Yes	Yes	No
Week 12	04_004	08JAN16	9:03:00	HCT	Hematocrit	Hematology	48.1	%	38	53		48.1	%	38	53		Normal				N		Week 12			47.5	Normal	0.6	04	Entered	34	Male	15OCT15	125	MF4637	<250 mg/day	No	No	<250 mg/day	No	Yes	Yes	Yes	No
Week 12	04_004	08JAN16	9:03:00	HGB	Hemoglobin	Hematology	15.4	g/dL	13.5	17.5		15.4	g/dL	13.5	17.5		Normal				N		Week 12			15.8	Normal	-0.4	04	Entered	34	Male	15OCT15	125	MF4637	<250 mg/day	No	No	<250 mg/day	No	Yes	Yes	Yes	No
Week 12	04_004	08JAN16	9:03:00	LYM	Abs Lymphocytes	Hematology	2.1	K/uL	0.8	4		2.1	K/uL	0.8	4		Normal				N		Week 12			1.7	Normal	0.4	04	Entered	34	Male	15OCT15	125	MF4637	<250 mg/day	No	No	<250 mg/day	No	Yes	Yes	Yes	No
Week 12	04_004	08JAN16	9:03:00	LYMLE	Lymphocytes	Hematology	38	%	20	50		38	%	20	50		Normal				N		Week 12			30	Normal	8	04	Entered	34	Male	15OCT15	125	MF4637	<250 mg/day	No	No	<250 mg/day	No	Yes	Yes	Yes	No
Week 12	04_004	08JAN16	9:03:00	MONO	Abs Monocytes	Hematology	0.6	K/uL	0	0.9		0.6	K/uL	0	0.9		Normal				N		Week 12			0.6	Normal	0	04	Entered	34	Male	15OCT15	125	MF4637	<250 mg/day	No	No	<250 mg/day	No	Yes	Yes	Yes	No
Week 12	04_004	08JAN16	9:03:00	MONOLE	Monocytes	Hematology	10	%	1	9		10	%	1	9		High				N		Week 12			10	High	0	04	Entered	34	Male	15OCT15	125	MF4637	<250 mg/day	No	No	<250 mg/day	No	Yes	Yes	Yes	No
Week 12	04_004	08JAN16	9:03:00	NEUT	Abs Neutrophil	Hematology	2.6	K/uL	1.5	7.7		2.6	K/uL	1.5	7.7		Normal				N		Week 12			3.3	Normal	-0.7	04	Entered	34	Male	15OCT15	125	MF4637	<250 mg/day	No	No	<250 mg/day	No	Yes	Yes	Yes	No
Week 12	04_004	08JAN16	9:03:00	NEUTLE	Neutrophils	Hematology	47	%	45	79		47	%	45	79		Normal				N		Week 12			57	Normal	-10	04	Entered	34	Male	15OCT15	125	MF4637	<250 mg/day	No	No	<250 mg/day	No	Yes	Yes	Yes	No
Week 12	04_004	08JAN16	9:03:00	PLAT	Platelet Count	Hematology	212	K/uL	150	450		212	K/uL	150	450		Normal				N		Week 12			247	Normal	-35	04	Entered	34	Male	15OCT15	125	MF4637	<250 mg/day	No	No	<250 mg/day	No	Yes	Yes	Yes	No
Week 12	04_004	08JAN16	9:03:00	RBC	RBC	Hematology	4.92	M/uL	4.3	5.8		4.92	M/uL	4.3	5.8		Normal				N		Week 12			4.93	Normal	-0.01	04	Entered	34	Male	15OCT15	125	MF4637	<250 mg/day	No	No	<250 mg/day	No	Yes	Yes	Yes	No
Week 12	04_004	08JAN16	9:03:00	WBC	WBC	Hematology	5.5	K/uL	4	11		5.5	K/uL	4	11		Normal				N		Week 12			5.8	Normal	-0.3	04	Entered	34	Male	15OCT15	125	MF4637	<250 mg/day	No	No	<250 mg/day	No	Yes	Yes	Yes	No
Week 24	04_004	31MAR16	9:30:00	ALB	Albumin	Chemistry	4.8	g/dL	3.5	5.2		4.8	g/dL	3.5	5.2		Normal				Y		Week 24			5	Normal	-0.2	04	Entered	34	Male	15OCT15	125	MF4637	<250 mg/day	No	No	<250 mg/day	No	Yes	Yes	Yes	No
Week 24	04_004	31MAR16	9:30:00	ALP	Alkaline Phosphatase	Liver Function Tests	72	IU/L	32	92		72	IU/L	32	92		Normal				Y		Week 24			61	Normal	11	04	Entered	34	Male	15OCT15	125	MF4637	<250 mg/day	No	No	<250 mg/day	No	Yes	Yes	Yes	No
Week 24	04_004	31MAR16	9:30:00	ALT	ALT	Liver Function Tests	208	IU/L	17	63		208	IU/L	17	63		High				Y		Week 24			146	High	62	04	Entered	34	Male	15OCT15	125	MF4637	<250 mg/day	No	No	<250 mg/day	No	Yes	Yes	Yes	No
Week 24	04_004	31MAR16	9:30:00	AST	AST	Liver Function Tests	116	IU/L	15	41		116	IU/L	15	41		High				Y		Week 24			97	High	19	04	Entered	34	Male	15OCT15	125	MF4637	<250 mg/day	No	No	<250 mg/day	No	Yes	Yes	Yes	No
Week 24	04_004	31MAR16	9:30:00	BASO	Abs Basophils	Hematology	0.1	K/uL	0	0.2		0.1	K/uL	0	0.2		Normal				Y		Week 24			0.1	Normal	0	04	Entered	34	Male	15OCT15	125	MF4637	<250 mg/day	No	No	<250 mg/day	No	Yes	Yes	Yes	No
Week 24	04_004	31MAR16	9:30:00	BASOLE	Basophils	Hematology	1	%	0	2		1	%	0	2		Normal				Y		Week 24			1	Normal	0	04	Entered	34	Male	15OCT15	125	MF4637	<250 mg/day	No	No	<250 mg/day	No	Yes	Yes	Yes	No
Week 24	04_004	31MAR16	9:30:00	BICARB	BiCarbonate (CO2)	Chemistry	23	mmol/L	22	32		23	mmol/L	22	32		Normal				Y		Week 24			24	Normal	-1	04	Entered	34	Male	15OCT15	125	MF4637	<250 mg/day	No	No	<250 mg/day	No	Yes	Yes	Yes	No
Week 24	04_004	31MAR16	9:30:00	BILIT	Bilirubin Total	Liver Function Tests	0.8	mg/dL	0.3	1.2		0.8	mg/dL	0.3	1.2		Normal				Y		Week 24			0.7	Normal	0.1	04	Entered	34	Male	15OCT15	125	MF4637	<250 mg/day	No	No	<250 mg/day	No	Yes	Yes	Yes	No
Week 24	04_004	31MAR16	9:30:00	BUN	BUN (urea)	Chemistry	10	mg/dL	6	20		10	mg/dL	6	20		Normal				Y		Week 24			13	Normal	-3	04	Entered	34	Male	15OCT15	125	MF4637	<250 mg/day	No	No	<250 mg/day	No	Yes	Yes	Yes	No
Week 24	04_004	31MAR16	9:30:00	CA	Calcium	Chemistry	10.1	mg/dL	8.6	10		10.1	mg/dL	8.6	10		High				Y		Week 24			9.9	Normal	0.2	04	Entered	34	Male	15OCT15	125	MF4637	<250 mg/day	No	No	<250 mg/day	No	Yes	Yes	Yes	No
Week 24	04_004	31MAR16	9:30:00	CL	Chloride	Chemistry	99	mmol/L	98	107		99	mmol/L	98	107		Normal				Y		Week 24			99	Normal	0	04	Entered	34	Male	15OCT15	125	MF4637	<250 mg/day	No	No	<250 mg/day	No	Yes	Yes	Yes	No
Week 24	04_004	31MAR16	9:30:00	CREAT	Creatinine	Chemistry	0.8	mg/dL	0.9	1.3		0.8	mg/dL	0.9	1.3		Low				Y		Week 24			0.8	Low	0	04	Entered	34	Male	15OCT15	125	MF4637	<250 mg/day	No	No	<250 mg/day	No	Yes	Yes	Yes	No
Week 24	04_004	31MAR16	9:30:00	CRPHS	hs-CRP	hs-CRP	1.49	mg/L				1.49	mg/L				Normal				Y	hs-CRP CHD risk level: low risk <1.0 mg/L intermediate risk 1.0-3.0 mg/L high risk >3.0 mg/L Values >10 mg/L suggests an inflammatory disorder requiring separate evaluation. Cardiac risk assessment is not appropriate in this context.	Week 24			1.85	Normal	-0.36	04	Entered	34	Male	15OCT15	125	MF4637	<250 mg/day	No	No	<250 mg/day	No	Yes	Yes	Yes	No
Week 24	04_004	31MAR16	9:30:00	EOS	Abs Eosinophils	Hematology	0.1	K/uL	0	0.6		0.1	K/uL	0	0.6		Normal				Y		Week 24			0.1	Normal	0	04	Entered	34	Male	15OCT15	125	MF4637	<250 mg/day	No	No	<250 mg/day	No	Yes	Yes	Yes	No
Week 24	04_004	31MAR16	9:30:00	EOSLE	Eosinophils	Hematology	2	%	0	4		2	%	0	4		Normal				Y		Week 24			2	Normal	0	04	Entered	34	Male	15OCT15	125	MF4637	<250 mg/day	No	No	<250 mg/day	No	Yes	Yes	Yes	No
Week 24	04_004	31MAR16	9:30:00	GGT	GGT	Liver Function Tests	254	IU/L	7	50		254	IU/L	7	50		High				Y		Week 24			136	High	118	04	Entered	34	Male	15OCT15	125	MF4637	<250 mg/day	No	No	<250 mg/day	No	Yes	Yes	Yes	No
Week 24	04_004	31MAR16	9:30:00	GLUCF	Glucose Fasting	Chemistry	86	mg/dL	70	99		86	mg/dL	70	99		Normal				Y		Week 24			83	Normal	3	04	Entered	34	Male	15OCT15	125	MF4637	<250 mg/day	No	No	<250 mg/day	No	Yes	Yes	Yes	No
Week 24	04_004	31MAR16	9:30:00	HBA1C	HbA1c	HbA1c	5.3	%	4	5.6		5.3	%	4	5.6		Normal				Y	INTERPRETIVE INFORMATION: Hemoglobin A1cHemoglobin A1c values of 5.7-6.4 percent indicate an increasedrisk for developing diabetes mellitus. Hemoglobin A1c valuesgreater than or equal to 6.5 percent are diagnostic of diabetesmellitus. Diagnosis should be confirmed by repeating the Hb A1ctest.This boronate affinity Hb A1c method provides accurate analyticalresults in the presence of nearly all hem…	Week 24			5.3	Normal	0	04	Entered	34	Male	15OCT15	125	MF4637	<250 mg/day	No	No	<250 mg/day	No	Yes	Yes	Yes	No
Week 24	04_004	31MAR16	9:30:00	HCT	Hematocrit	Hematology	49.5	%	38	53		49.5	%	38	53		Normal				Y		Week 24			47.5	Normal	2	04	Entered	34	Male	15OCT15	125	MF4637	<250 mg/day	No	No	<250 mg/day	No	Yes	Yes	Yes	No
Week 24	04_004	31MAR16	9:30:00	HGB	Hemoglobin	Hematology	16.8	g/dL	13.5	17.5		16.8	g/dL	13.5	17.5		Normal				Y		Week 24			15.8	Normal	1	04	Entered	34	Male	15OCT15	125	MF4637	<250 mg/day	No	No	<250 mg/day	No	Yes	Yes	Yes	No
Week 24	04_004	31MAR16	9:30:00	INSULIN	Insulin	Insulin	18.4	uIU/mL	1.9	23		18.4	uIU/mL	1.9	23		Normal				Y		Week 24			4.4	Normal	14	04	Entered	34	Male	15OCT15	125	MF4637	<250 mg/day	No	No	<250 mg/day	No	Yes	Yes	Yes	No
Week 24	04_004	31MAR16	9:30:00	K	Potassium	Chemistry	4.1	mmol/L	3.5	5.1		4.1	mmol/L	3.5	5.1		Normal				Y		Week 24			4.3	Normal	-0.2	04	Entered	34	Male	15OCT15	125	MF4637	<250 mg/day	No	No	<250 mg/day	No	Yes	Yes	Yes	No
Week 24	04_004	31MAR16	9:30:00	LYM	Abs Lymphocytes	Hematology	1.8	K/uL	0.8	4		1.8	K/uL	0.8	4		Normal				Y		Week 24			1.7	Normal	0.1	04	Entered	34	Male	15OCT15	125	MF4637	<250 mg/day	No	No	<250 mg/day	No	Yes	Yes	Yes	No
Week 24	04_004	31MAR16	9:30:00	LYMLE	Lymphocytes	Hematology	32	%	20	50		32	%	20	50		Normal				Y		Week 24			30	Normal	2	04	Entered	34	Male	15OCT15	125	MF4637	<250 mg/day	No	No	<250 mg/day	No	Yes	Yes	Yes	No
Week 24	04_004	31MAR16	9:30:00	MONO	Abs Monocytes	Hematology	0.6	K/uL	0	0.9		0.6	K/uL	0	0.9		Normal				Y		Week 24			0.6	Normal	0	04	Entered	34	Male	15OCT15	125	MF4637	<250 mg/day	No	No	<250 mg/day	No	Yes	Yes	Yes	No
Week 24	04_004	31MAR16	9:30:00	MONOLE	Monocytes	Hematology	11	%	1	9		11	%	1	9		High				Y		Week 24			10	High	1	04	Entered	34	Male	15OCT15	125	MF4637	<250 mg/day	No	No	<250 mg/day	No	Yes	Yes	Yes	No
Week 24	04_004	31MAR16	9:30:00	NEUT	Abs Neutrophil	Hematology	3.1	K/uL	1.5	7.7		3.1	K/uL	1.5	7.7		Normal				Y		Week 24			3.3	Normal	-0.2	04	Entered	34	Male	15OCT15	125	MF4637	<250 mg/day	No	No	<250 mg/day	No	Yes	Yes	Yes	No
Week 24	04_004	31MAR16	9:30:00	NEUTLE	Neutrophils	Hematology	54	%	45	79		54	%	45	79		Normal				Y		Week 24			57	Normal	-3	04	Entered	34	Male	15OCT15	125	MF4637	<250 mg/day	No	No	<250 mg/day	No	Yes	Yes	Yes	No
Week 24	04_004	31MAR16	9:30:00	PLAT	Platelet Count	Hematology	229	K/uL	150	450		229	K/uL	150	450		Normal				Y		Week 24			247	Normal	-18	04	Entered	34	Male	15OCT15	125	MF4637	<250 mg/day	No	No	<250 mg/day	No	Yes	Yes	Yes	No
Week 24	04_004	31MAR16	9:30:00	RBC	RBC	Hematology	5.12	M/uL	4.3	5.8		5.12	M/uL	4.3	5.8		Normal				Y		Week 24			4.93	Normal	0.19	04	Entered	34	Male	15OCT15	125	MF4637	<250 mg/day	No	No	<250 mg/day	No	Yes	Yes	Yes	No
Week 24	04_004	31MAR16	9:30:00	SODIUM	Sodium	Chemistry	134	mmol/L	136	145		134	mmol/L	136	145		Low				Y		Week 24			136	Normal	-2	04	Entered	34	Male	15OCT15	125	MF4637	<250 mg/day	No	No	<250 mg/day	No	Yes	Yes	Yes	No
Week 24	04_004	31MAR16	9:30:00	TRIG	Triglycerides	Chemistry	84	mg/dL		150		84	mg/dL		150		Normal				Y		Week 24			112	Normal	-28	04	Entered	34	Male	15OCT15	125	MF4637	<250 mg/day	No	No	<250 mg/day	No	Yes	Yes	Yes	No
Week 24	04_004	31MAR16	9:30:00	TSH	TSH	TSH	1.74	uIU/mL	0.34	5.6		1.74	uIU/mL	0.34	5.6		Normal				Y		Week 24			1.4	Normal	0.34	04	Entered	34	Male	15OCT15	125	MF4637	<250 mg/day	No	No	<250 mg/day	No	Yes	Yes	Yes	No
Week 24	04_004	31MAR16	9:30:00	WBC	WBC	Hematology	5.7	K/uL	4	11		5.7	K/uL	4	11		Normal				Y		Week 24			5.8	Normal	-0.1	04	Entered	34	Male	15OCT15	125	MF4637	<250 mg/day	No	No	<250 mg/day	No	Yes	Yes	Yes	No
Unscheduled Visit	04_004	18JAN16	9:03:00	ALB	Albumin	Chemistry	5.0	g/dL	3.5	5.2		5	g/dL	3.5	5.2		Normal				N		Unscheduled Visit			5	Normal	0	04	Entered	34	Male	15OCT15	125	MF4637	<250 mg/day	No	No	<250 mg/day	No	Yes	Yes	Yes	No
Unscheduled Visit	04_004	18JAN16	9:03:00	BICARB	BiCarbonate (CO2)	Chemistry	24	mmol/L	22	32		24	mmol/L	22	32		Normal				N		Unscheduled Visit			24	Normal	0	04	Entered	34	Male	15OCT15	125	MF4637	<250 mg/day	No	No	<250 mg/day	No	Yes	Yes	Yes	No
Unscheduled Visit	04_004	18JAN16	9:03:00	BUN	BUN (urea)	Chemistry	10	mg/dL	6	20		10	mg/dL	6	20		Normal				N		Unscheduled Visit			13	Normal	-3	04	Entered	34	Male	15OCT15	125	MF4637	<250 mg/day	No	No	<250 mg/day	No	Yes	Yes	Yes	No
Unscheduled Visit	04_004	18JAN16	9:03:00	CA	Calcium	Chemistry	9.8	mg/dL	8.6	10		9.8	mg/dL	8.6	10		Normal				N		Unscheduled Visit			9.9	Normal	-0.1	04	Entered	34	Male	15OCT15	125	MF4637	<250 mg/day	No	No	<250 mg/day	No	Yes	Yes	Yes	No
Unscheduled Visit	04_004	18JAN16	9:03:00	CL	Chloride	Chemistry	100	mmol/L	98	107		100	mmol/L	98	107		Normal				N		Unscheduled Visit			99	Normal	1	04	Entered	34	Male	15OCT15	125	MF4637	<250 mg/day	No	No	<250 mg/day	No	Yes	Yes	Yes	No
Unscheduled Visit	04_004	18JAN16	9:03:00	CREAT	Creatinine	Chemistry	0.7	mg/dL	0.9	1.3		0.7	mg/dL	0.9	1.3		Low				N		Unscheduled Visit			0.8	Low	-0.1	04	Entered	34	Male	15OCT15	125	MF4637	<250 mg/day	No	No	<250 mg/day	No	Yes	Yes	Yes	No
Unscheduled Visit	04_004	18JAN16	9:03:00	GLUC	Glucose Random	Chemistry	116	mg/dL	70	139		116	mg/dL	70	139		Normal				N		Unscheduled Visit						04	Entered	34	Male	15OCT15	125	MF4637	<250 mg/day	No	No	<250 mg/day	No	Yes	Yes	Yes	No
Unscheduled Visit	04_004	18JAN16	9:03:00	K	Potassium	Chemistry	4.2	mmol/L	3.5	5.1		4.2	mmol/L	3.5	5.1		Normal				N		Unscheduled Visit			4.3	Normal	-0.1	04	Entered	34	Male	15OCT15	125	MF4637	<250 mg/day	No	No	<250 mg/day	No	Yes	Yes	Yes	No
Unscheduled Visit	04_004	18JAN16	9:03:00	SODIUM	Sodium	Chemistry	134	mmol/L	136	145		134	mmol/L	136	145		Low				N		Unscheduled Visit			136	Normal	-2	04	Entered	34	Male	15OCT15	125	MF4637	<250 mg/day	No	No	<250 mg/day	No	Yes	Yes	Yes	No
Unscheduled Visit	04_004	18JAN16	9:03:00	TRIG	Triglycerides	Chemistry	99	mg/dL		150		99	mg/dL		150		Normal				N		Unscheduled Visit			112	Normal	-13	04	Entered	34	Male	15OCT15	125	MF4637	<250 mg/day	No	No	<250 mg/day	No	Yes	Yes	Yes	No
Screening	04_005	22OCT15	14:48:00	ALP	Alkaline Phosphatase	Liver Function Tests	78	IU/L	32	92		78	IU/L	32	92		Normal				N		Screening			78	Normal		04	Screen Failure	40	Female							<250 mg/day	Yes	No	No	No	No
Screening	04_005	22OCT15	14:48:00	ALT	ALT	Liver Function Tests	28	IU/L	14	54		28	IU/L	14	54		Normal				N		Screening			28	Normal		04	Screen Failure	40	Female							<250 mg/day	Yes	No	No	No	No
Screening	04_005	22OCT15	14:48:00	AST	AST	Liver Function Tests	23	IU/L	15	41		23	IU/L	15	41		Normal				N		Screening			23	Normal		04	Screen Failure	40	Female							<250 mg/day	Yes	No	No	No	No
Screening	04_005	22OCT15	14:48:00	BILIT	Bilirubin Total	Liver Function Tests	0.3	mg/dL	0.3	1.2		0.3	mg/dL	0.3	1.2		Normal				N		Screening			0.3	Normal		04	Screen Failure	40	Female							<250 mg/day	Yes	No	No	No	No
Screening	04_005	22OCT15	14:48:00	GGT	GGT	Liver Function Tests	21	IU/L	7	50		21	IU/L	7	50		Normal				N		Screening			21	Normal		04	Screen Failure	40	Female							<250 mg/day	Yes	No	No	No	No
Screening	04_005	22OCT15	14:48:00	HBA1C	HbA1c	HbA1c	5.4	%	4	5.6		5.4	%	4	5.6		Normal				N	INTERPRETIVE INFORMATION: Hemoglobin A1cHemoglobin A1c values of 5.7-6.4 percent indicate an increasedrisk for developing diabetes mellitus. Hemoglobin A1c valuesgreater than or equal to 6.5 percent are diagnostic of diabetesmellitus. Diagnosis should be confirmed by repeating the Hb A1ctest.This boronate affinity Hb A1c method provides accurate analyticalresults in the presence of nearly all hem…	Screening			5.4	Normal		04	Screen Failure	40	Female							<250 mg/day	Yes	No	No	No	No
Screening	04_005	22OCT15	14:48:00	HCAB	Hepatitis C Antibody	Hepatitis C Antibody	NONREACT				NONREACT					NONREACT					N		Screening						04	Screen Failure	40	Female							<250 mg/day	Yes	No	No	No	No
Screening	04_005	22OCT15	14:48:00	TSH	TSH	TSH	1.01	uIU/mL	0.34	5.6		1.01	uIU/mL	0.34	5.6		Normal				N		Screening			1.01	Normal		04	Screen Failure	40	Female							<250 mg/day	Yes	No	No	No	No
Screening	04_006	30OCT15	12:31:00	ALP	Alkaline Phosphatase	Liver Function Tests	57	IU/L	32	92		57	IU/L	32	92		Normal				N		Screening			57	Normal		04	Screen Failure	54	Female							>=250 mg/day	Yes	No	No	No	No
Screening	04_006	30OCT15	12:31:00	ALT	ALT	Liver Function Tests	28	IU/L	14	54		28	IU/L	14	54		Normal				N		Screening			28	Normal		04	Screen Failure	54	Female							>=250 mg/day	Yes	No	No	No	No
Screening	04_006	30OCT15	12:31:00	AST	AST	Liver Function Tests	22	IU/L	15	41		22	IU/L	15	41		Normal				N		Screening			22	Normal		04	Screen Failure	54	Female							>=250 mg/day	Yes	No	No	No	No
Screening	04_006	30OCT15	12:31:00	BILIT	Bilirubin Total	Liver Function Tests	0.3	mg/dL	0.3	1.2		0.3	mg/dL	0.3	1.2		Normal				N		Screening			0.3	Normal		04	Screen Failure	54	Female							>=250 mg/day	Yes	No	No	No	No
Screening	04_006	30OCT15	12:31:00	GGT	GGT	Liver Function Tests	17	IU/L	7	50		17	IU/L	7	50		Normal				N		Screening			17	Normal		04	Screen Failure	54	Female							>=250 mg/day	Yes	No	No	No	No
Screening	04_006	30OCT15	12:31:00	HCAB	Hepatitis C Antibody	Hepatitis C Antibody	NONREACT				NONREACT					NONREACT					N		Screening						04	Screen Failure	54	Female							>=250 mg/day	Yes	No	No	No	No
Screening	04_007	03NOV15	13:20:00	ALP	Alkaline Phosphatase	Liver Function Tests	87	IU/L	32	92		87	IU/L	32	92		Normal				N		Screening			87	Normal		04	Screen Failure	59	Female							>=250 mg/day	Yes	No	No	No	No
Screening	04_007	03NOV15	13:20:00	ALT	ALT	Liver Function Tests	14	IU/L	14	54		14	IU/L	14	54		Normal				N		Screening			14	Normal		04	Screen Failure	59	Female							>=250 mg/day	Yes	No	No	No	No
Screening	04_007	03NOV15	13:20:00	AST	AST	Liver Function Tests	16	IU/L	15	41		16	IU/L	15	41		Normal				N		Screening			16	Normal		04	Screen Failure	59	Female							>=250 mg/day	Yes	No	No	No	No
Screening	04_007	03NOV15	13:20:00	BILIT	Bilirubin Total	Liver Function Tests	0.4	mg/dL	0.3	1.2		0.4	mg/dL	0.3	1.2		Normal				N		Screening			0.4	Normal		04	Screen Failure	59	Female							>=250 mg/day	Yes	No	No	No	No
Screening	04_007	03NOV15	13:20:00	GGT	GGT	Liver Function Tests	25	IU/L	7	50		25	IU/L	7	50		Normal				N		Screening			25	Normal		04	Screen Failure	59	Female							>=250 mg/day	Yes	No	No	No	No
Screening	04_007	03NOV15	13:20:00	HBA1C	HbA1c	HbA1c	5.3	%	4	5.6		5.3	%	4	5.6		Normal				N	INTERPRETIVE INFORMATION: Hemoglobin A1cHemoglobin A1c values of 5.7-6.4 percent indicate an increasedrisk for developing diabetes mellitus. Hemoglobin A1c valuesgreater than or equal to 6.5 percent are diagnostic of diabetesmellitus. Diagnosis should be confirmed by repeating the Hb A1ctest.This boronate affinity Hb A1c method provides accurate analyticalresults in the presence of nearly all hem…	Screening			5.3	Normal		04	Screen Failure	59	Female							>=250 mg/day	Yes	No	No	No	No
Screening	04_007	03NOV15	13:20:00	HCAB	Hepatitis C Antibody	Hepatitis C Antibody	NONREACT				NONREACT					NONREACT					N		Screening						04	Screen Failure	59	Female							>=250 mg/day	Yes	No	No	No	No
Screening	04_007	03NOV15	13:20:00	TSH	TSH	TSH	1.12	uIU/mL	0.34	5.6		1.12	uIU/mL	0.34	5.6		Normal				N		Screening			1.12	Normal		04	Screen Failure	59	Female							>=250 mg/day	Yes	No	No	No	No
Screening	04_008	04NOV15	10:35:00	ALP	Alkaline Phosphatase	Liver Function Tests	194	IU/L	32	92		194	IU/L	32	92		High				N		Screening			194	High		04	Screen Failure	25	Female							>=250 mg/day	Yes	No	No	No	No
Screening	04_008	04NOV15	10:35:00	ALT	ALT	Liver Function Tests	17	IU/L	14	54		17	IU/L	14	54		Normal				N		Screening			17	Normal		04	Screen Failure	25	Female							>=250 mg/day	Yes	No	No	No	No
Screening	04_008	04NOV15	10:35:00	AST	AST	Liver Function Tests	21	IU/L	15	41		21	IU/L	15	41		Normal				N		Screening			21	Normal		04	Screen Failure	25	Female							>=250 mg/day	Yes	No	No	No	No
Screening	04_008	04NOV15	10:35:00	BILIT	Bilirubin Total	Liver Function Tests	0.5	mg/dL	0.3	1.2		0.5	mg/dL	0.3	1.2		Normal				N		Screening			0.5	Normal		04	Screen Failure	25	Female							>=250 mg/day	Yes	No	No	No	No
Screening	04_008	04NOV15	10:35:00	GGT	GGT	Liver Function Tests	16	IU/L	7	50		16	IU/L	7	50		Normal				N		Screening			16	Normal		04	Screen Failure	25	Female							>=250 mg/day	Yes	No	No	No	No
Screening	04_008	04NOV15	10:35:00	HBA1C	HbA1c	HbA1c	5.2	%	4	5.6		5.2	%	4	5.6		Normal				N	INTERPRETIVE INFORMATION: Hemoglobin A1cHemoglobin A1c values of 5.7-6.4 percent indicate an increasedrisk for developing diabetes mellitus. Hemoglobin A1c valuesgreater than or equal to 6.5 percent are diagnostic of diabetesmellitus. Diagnosis should be confirmed by repeating the Hb A1ctest.This boronate affinity Hb A1c method provides accurate analyticalresults in the presence of nearly all hem…	Screening			5.2	Normal		04	Screen Failure	25	Female							>=250 mg/day	Yes	No	No	No	No
Screening	04_008	04NOV15	10:35:00	HCAB	Hepatitis C Antibody	Hepatitis C Antibody	NONREACT				NONREACT					NONREACT					N		Screening						04	Screen Failure	25	Female							>=250 mg/day	Yes	No	No	No	No
Screening	04_008	04NOV15	10:35:00	TSH	TSH	TSH	1.42	uIU/mL	0.34	5.6		1.42	uIU/mL	0.34	5.6		Normal				N		Screening			1.42	Normal		04	Screen Failure	25	Female							>=250 mg/day	Yes	No	No	No	No
Screening	04_009	28DEC15	13:18:00	ALP	Alkaline Phosphatase	Liver Function Tests	80	IU/L	32	92		80	IU/L	32	92		Normal				N		Screening			85	Normal		04	Entered	53	Female	04JAN16	127	Placebo	<250 mg/day	No	No	<250 mg/day	No	Yes	Yes	Yes	Yes
Screening	04_009	28DEC15	13:18:00	ALT	ALT	Liver Function Tests	35	IU/L	14	54		35	IU/L	14	54		Normal				N		Screening			41	Normal		04	Entered	53	Female	04JAN16	127	Placebo	<250 mg/day	No	No	<250 mg/day	No	Yes	Yes	Yes	Yes
Screening	04_009	28DEC15	13:18:00	AST	AST	Liver Function Tests	29	IU/L	15	41		29	IU/L	15	41		Normal				N		Screening			33	Normal		04	Entered	53	Female	04JAN16	127	Placebo	<250 mg/day	No	No	<250 mg/day	No	Yes	Yes	Yes	Yes
Screening	04_009	28DEC15	13:18:00	BILIT	Bilirubin Total	Liver Function Tests	0.3	mg/dL	0.3	1.2		0.3	mg/dL	0.3	1.2		Normal				N		Screening			0.4	Normal		04	Entered	53	Female	04JAN16	127	Placebo	<250 mg/day	No	No	<250 mg/day	No	Yes	Yes	Yes	Yes
Screening	04_009	28DEC15	13:18:00	GGT	GGT	Liver Function Tests	32	IU/L	7	50		32	IU/L	7	50		Normal				N		Screening			43	Normal		04	Entered	53	Female	04JAN16	127	Placebo	<250 mg/day	No	No	<250 mg/day	No	Yes	Yes	Yes	Yes
Screening	04_009	28DEC15	13:18:00	HBA1C	HbA1c	HbA1c	5.8	%	4	5.6		5.8	%	4	5.6		High				N	INTERPRETIVE INFORMATION: Hemoglobin A1cHemoglobin A1c values of 5.7-6.4 percent indicate an increasedrisk for developing diabetes mellitus. Hemoglobin A1c valuesgreater than or equal to 6.5 percent are diagnostic of diabetesmellitus. Diagnosis should be confirmed by repeating the Hb A1ctest.This boronate affinity Hb A1c method provides accurate analyticalresults in the presence of nearly all hem…	Screening			5.8	High		04	Entered	53	Female	04JAN16	127	Placebo	<250 mg/day	No	No	<250 mg/day	No	Yes	Yes	Yes	Yes
Screening	04_009	28DEC15	13:18:00	HCAB	Hepatitis C Antibody	Hepatitis C Antibody	NONREACT				NONREACT					NONREACT					N		Screening						04	Entered	53	Female	04JAN16	127	Placebo	<250 mg/day	No	No	<250 mg/day	No	Yes	Yes	Yes	Yes
Screening	04_009	28DEC15	13:18:00	TSH	TSH	TSH	1.89	uIU/mL	0.34	5.6		1.89	uIU/mL	0.34	5.6		Normal				N		Screening			1.89	Normal		04	Entered	53	Female	04JAN16	127	Placebo	<250 mg/day	No	No	<250 mg/day	No	Yes	Yes	Yes	Yes
[truncated: 14,947 more rows]
