# Supplementary material for: Evaluation of a High Concentrate Omega-3 for Correcting the Omega-3 Fatty Acid Nutritional Deficiency in Non-alcoholic Fatty Liver Disease and effects on Hepatic Steatosis (CONDIN)
Source: Preprints.org preprint supplement (doi:10.20944/preprints201807.0240.v1), 2018-07-13
Supplement: Supplementary file 11 [file MH.xlsx]

## Sheet: MH
VISIT	MHSPID	MHTERM	CATEGORY	CONTROL	MHONGO	SUBJID	MHSTDT	CDMHST	MHENDT	CDMHEN	NAFLDOTH	MHT2DYN	MHUPDATE	MHYN	NAFLDYN	ULTRARES	NAFLDM	NASHYN	NAFLDDT	CDNAFLD	ULTRADT	CDULTRA	SITE	STATUS	AGE	SEX	FIRSTDT	RANDNO	TREAT	OMEGA	DIABETE	STATIN	OMEGA_C	SFFL	SAFETY	ITT	MITT	PP
Visit 1	1	Hypertensive heart disease without heart failure	cardiovascular	Yes	Yes	02_001	01JUL12	01JUL2012				Yes		Yes	No			No					02	Entered	57	Female	27OCT15	108	MF4637	<250 mg/day	Yes	Yes	<250 mg/day	No	Yes	Yes	Yes	Yes
Visit 1	2	Diabetes Mellitus type II	endocrine	Yes	Yes	02_001	12JUN13	12JUN2013				Yes		Yes	No			No					02	Entered	57	Female	27OCT15	108	MF4637	<250 mg/day	Yes	Yes	<250 mg/day	No	Yes	Yes	Yes	Yes
Visit 1	3	Gastro-esophageal reflux disease without esophagitis	gastrointestinal	Yes	Yes	02_001	01JUL12	01JUL2012				Yes		Yes	No			No					02	Entered	57	Female	27OCT15	108	MF4637	<250 mg/day	Yes	Yes	<250 mg/day	No	Yes	Yes	Yes	Yes
Visit 1	4	Mixed hyperlipidemia	cardiovascular	Yes	Yes	02_001	01JUL12	01JUL2012				Yes		Yes	No			No					02	Entered	57	Female	27OCT15	108	MF4637	<250 mg/day	Yes	Yes	<250 mg/day	No	Yes	Yes	Yes	Yes
Visit 1	6	Vitamin D deficiency	blood/bleeding disorders	Yes	Yes	02_001	01JUL12	01JUL2012				Yes		Yes	No			No					02	Entered	57	Female	27OCT15	108	MF4637	<250 mg/day	Yes	Yes	<250 mg/day	No	Yes	Yes	Yes	Yes
Visit 1	7	Allergic rhinitis, unspecified	allergies	Yes	Yes	02_001	13AUG07	13AUG2007				Yes		Yes	No			No					02	Entered	57	Female	27OCT15	108	MF4637	<250 mg/day	Yes	Yes	<250 mg/day	No	Yes	Yes	Yes	Yes
Visit 1	8	Anxiety disorder, unspecified	psychological	Yes	Yes	02_001	16JUL05	16JUL2005				Yes		Yes	No			No					02	Entered	57	Female	27OCT15	108	MF4637	<250 mg/day	Yes	Yes	<250 mg/day	No	Yes	Yes	Yes	Yes
Visit 1	9	Other asthma	cardiovascular	Yes	Yes	02_001	12JAN07	12JAN2007				Yes		Yes	No			No					02	Entered	57	Female	27OCT15	108	MF4637	<250 mg/day	Yes	Yes	<250 mg/day	No	Yes	Yes	Yes	Yes
Visit 1	10	Hypokalemia	cardiovascular	Yes	Yes	02_001	12JAN07	12JAN2007				Yes		Yes	No			No					02	Entered	57	Female	27OCT15	108	MF4637	<250 mg/day	Yes	Yes	<250 mg/day	No	Yes	Yes	Yes	Yes
Visit 1	11	Incomplete rotator cuff tear or rupture of unspecified shoulder, not specified as traumatic	musculoskeletal	Yes	Yes	02_001	01OCT05	01OCT2005				Yes		Yes	No			No					02	Entered	57	Female	27OCT15	108	MF4637	<250 mg/day	Yes	Yes	<250 mg/day	No	Yes	Yes	Yes	Yes
Visit 1	12	Cholecystectomy	surgeries	N/A		02_001	12OCT00	12OCT2000	12OCT00	12OCT2000		Yes		Yes	No			No					02	Entered	57	Female	27OCT15	108	MF4637	<250 mg/day	Yes	Yes	<250 mg/day	No	Yes	Yes	Yes	Yes
Visit 1	13	H. Pylori treatment	surgeries	N/A		02_001	12OCT00	12OCT2000	12OCT00	12OCT2000		Yes		Yes	No			No					02	Entered	57	Female	27OCT15	108	MF4637	<250 mg/day	Yes	Yes	<250 mg/day	No	Yes	Yes	Yes	Yes
Visit 1	14	Carpal tunnel surgery right	surgeries	N/A		02_001	12OCT06	12OCT2006	12OCT06	12OCT2006		Yes		Yes	No			No					02	Entered	57	Female	27OCT15	108	MF4637	<250 mg/day	Yes	Yes	<250 mg/day	No	Yes	Yes	Yes	Yes
Visit 1	15	Carpal tunnel surgery left	surgeries	N/A		02_001	01OCT07	01OCT2007	01OCT07	01OCT2007		Yes		Yes	No			No					02	Entered	57	Female	27OCT15	108	MF4637	<250 mg/day	Yes	Yes	<250 mg/day	No	Yes	Yes	Yes	Yes
Visit 1	16	Diverticulitis	gastrointestinal	Yes	Yes	02_001	28MAR13	28MAR2013				Yes		Yes	No			No					02	Entered	57	Female	27OCT15	108	MF4637	<250 mg/day	Yes	Yes	<250 mg/day	No	Yes	Yes	Yes	Yes
Visit 1	17	Polyp	gastrointestinal	Yes	No	02_001	14JUN08	14JUN2008				Yes		Yes	No			No					02	Entered	57	Female	27OCT15	108	MF4637	<250 mg/day	Yes	Yes	<250 mg/day	No	Yes	Yes	Yes	Yes
Visit 1	18	Screening finding	blood/bleeding disorders	Yes	No	02_001	08JAN12	08JAN2012				Yes		Yes	No			No					02	Entered	57	Female	27OCT15	108	MF4637	<250 mg/day	Yes	Yes	<250 mg/day	No	Yes	Yes	Yes	Yes
Visit 1	19	Colonoscopy	gastrointestinal	N/A		02_001	14JUN08	14JUN2008	14JUN08	14JUN2008		Yes		Yes	No			No					02	Entered	57	Female	27OCT15	108	MF4637	<250 mg/day	Yes	Yes	<250 mg/day	No	Yes	Yes	Yes	Yes
Visit 1	20	Raynauds Syndrome	musculoskeletal	Yes	Yes	02_001	12JAN07	12JAN2007				Yes		Yes	No			No					02	Entered	57	Female	27OCT15	108	MF4637	<250 mg/day	Yes	Yes	<250 mg/day	No	Yes	Yes	Yes	Yes
Visit 1	21	Osteoarthritis	musculoskeletal	Yes	Yes	02_001	12JAN07	12JAN2007				Yes		Yes	No			No					02	Entered	57	Female	27OCT15	108	MF4637	<250 mg/day	Yes	Yes	<250 mg/day	No	Yes	Yes	Yes	Yes
Visit 1	22	GERD	gastrointestinal	Yes	Yes	02_001	12JAN07	12JAN2007				Yes		Yes	No			No					02	Entered	57	Female	27OCT15	108	MF4637	<250 mg/day	Yes	Yes	<250 mg/day	No	Yes	Yes	Yes	Yes
Visit 1	23	NAFLD	liver	Yes	Yes	02_001	16MAY12	16MAY2012				Yes		Yes	No			No					02	Entered	57	Female	27OCT15	108	MF4637	<250 mg/day	Yes	Yes	<250 mg/day	No	Yes	Yes	Yes	Yes
Visit 2	1	Hypertensive heart disease without heart failure	cardiovascular	Yes	Yes	02_001	01JUL12	01JUL2012					No										02	Entered	57	Female	27OCT15	108	MF4637	<250 mg/day	Yes	Yes	<250 mg/day	No	Yes	Yes	Yes	Yes
Visit 2	2	Diabetes Mellitus type II	endocrine	Yes	Yes	02_001	12JUN13	12JUN2013					No										02	Entered	57	Female	27OCT15	108	MF4637	<250 mg/day	Yes	Yes	<250 mg/day	No	Yes	Yes	Yes	Yes
Visit 2	3	Gastro-esophageal reflux disease without esophagitis	gastrointestinal	Yes	Yes	02_001	01JUL12	01JUL2012					No										02	Entered	57	Female	27OCT15	108	MF4637	<250 mg/day	Yes	Yes	<250 mg/day	No	Yes	Yes	Yes	Yes
Visit 2	4	Mixed hyperlipidemia	cardiovascular	Yes	Yes	02_001	01JUL12	01JUL2012					No										02	Entered	57	Female	27OCT15	108	MF4637	<250 mg/day	Yes	Yes	<250 mg/day	No	Yes	Yes	Yes	Yes
Visit 2	6	Vitamin D deficiency	blood/bleeding disorders	No		02_001	01JUL12	01JUL2012					No										02	Entered	57	Female	27OCT15	108	MF4637	<250 mg/day	Yes	Yes	<250 mg/day	No	Yes	Yes	Yes	Yes
Visit 2	7	Allergic rhinitis, unspecified	allergies	Yes	Yes	02_001	13AUG07	13AUG2007					No										02	Entered	57	Female	27OCT15	108	MF4637	<250 mg/day	Yes	Yes	<250 mg/day	No	Yes	Yes	Yes	Yes
Visit 2	8	Anxiety disorder, unspecified	psychological	Yes	Yes	02_001	16JUL05	16JUL2005					No										02	Entered	57	Female	27OCT15	108	MF4637	<250 mg/day	Yes	Yes	<250 mg/day	No	Yes	Yes	Yes	Yes
Visit 2	9	Other asthma	eyes, ears, nose, throat	Yes		02_001	12JAN07	12JAN2007					No										02	Entered	57	Female	27OCT15	108	MF4637	<250 mg/day	Yes	Yes	<250 mg/day	No	Yes	Yes	Yes	Yes
Visit 2	10	Hypokalemia	blood/bleeding disorders	Yes		02_001	12JAN07	12JAN2007					No										02	Entered	57	Female	27OCT15	108	MF4637	<250 mg/day	Yes	Yes	<250 mg/day	No	Yes	Yes	Yes	Yes
Visit 2	11	Incomplete rotator cuff tear or rupture of unspecified shoulder, not specified as traumatic	musculoskeletal	Yes		02_001	01JAN05	01JAN2005					No										02	Entered	57	Female	27OCT15	108	MF4637	<250 mg/day	Yes	Yes	<250 mg/day	No	Yes	Yes	Yes	Yes
Visit 2	12	Cholecystectomy	surgeries	N/A		02_001	12OCT00	12OCT2000	12OCT00	12OCT2000			No										02	Entered	57	Female	27OCT15	108	MF4637	<250 mg/day	Yes	Yes	<250 mg/day	No	Yes	Yes	Yes	Yes
Visit 2	13	H. Pylori treatment	surgeries	N/A		02_001	12OCT00	12OCT2000	12OCT00	12OCT2000			No										02	Entered	57	Female	27OCT15	108	MF4637	<250 mg/day	Yes	Yes	<250 mg/day	No	Yes	Yes	Yes	Yes
Visit 2	14	Carpal tunnel surgery right	surgeries	N/A		02_001	12OCT06	12OCT2006	12OCT06	12OCT2006			No										02	Entered	57	Female	27OCT15	108	MF4637	<250 mg/day	Yes	Yes	<250 mg/day	No	Yes	Yes	Yes	Yes
Visit 2	15	Carpal tunnel surgery left	surgeries	N/A		02_001	01OCT07	01OCT2007	01OCT07	01OCT2007			No										02	Entered	57	Female	27OCT15	108	MF4637	<250 mg/day	Yes	Yes	<250 mg/day	No	Yes	Yes	Yes	Yes
Visit 1	1	Von Willebrand disease	blood/bleeding disorders	Yes	Yes	02_002	16APR15	16APR2015				No		Yes	No			No					02	Entered	41	Male	06NOV15	109	MF4637	<250 mg/day	No	Yes	>=250 mg/day	No	Yes	Yes	Yes	Yes
Visit 1	2	Mixed hypercholesterolemia and hypertriglyceridemia	cardiovascular	Yes	Yes	02_002	18FEB12	18FEB2012				No		Yes	No			No					02	Entered	41	Male	06NOV15	109	MF4637	<250 mg/day	No	Yes	>=250 mg/day	No	Yes	Yes	Yes	Yes
Visit 1	3	Other abnormal glucose	endocrine	Yes	Yes	02_002	08MAR12	08MAR2012				No		Yes	No			No					02	Entered	41	Male	06NOV15	109	MF4637	<250 mg/day	No	Yes	>=250 mg/day	No	Yes	Yes	Yes	Yes
Visit 1	4	Pure hyperglyceridemia	cardiovascular	Yes	Yes	02_002	08MAR12	08MAR2012				No		Yes	No			No					02	Entered	41	Male	06NOV15	109	MF4637	<250 mg/day	No	Yes	>=250 mg/day	No	Yes	Yes	Yes	Yes
Visit 1	5	Essential (primary) hypertension	cardiovascular	Yes	Yes	02_002	18FEB12	18FEB2012				No		Yes	No			No					02	Entered	41	Male	06NOV15	109	MF4637	<250 mg/day	No	Yes	>=250 mg/day	No	Yes	Yes	Yes	Yes
Visit 1	6	Nonspecific abnormal results of function study of liver	liver	Yes	Yes	02_002	16APR15	16APR2015				No		Yes	No			No					02	Entered	41	Male	06NOV15	109	MF4637	<250 mg/day	No	Yes	>=250 mg/day	No	Yes	Yes	Yes	Yes
Visit 1	7	Tonsillectomy	surgeries	N/A		02_002	01OCT84	01OCT1984	01OCT84	01OCT1984		No		Yes	No			No					02	Entered	41	Male	06NOV15	109	MF4637	<250 mg/day	No	Yes	>=250 mg/day	No	Yes	Yes	Yes	Yes
Visit 1	8	Procedure on left hand	surgeries	N/A	No	02_002	18JUN13	18JUN2013				No		Yes	No			No					02	Entered	41	Male	06NOV15	109	MF4637	<250 mg/day	No	Yes	>=250 mg/day	No	Yes	Yes	Yes	Yes
Visit 1	9	NAFLD	liver	Yes	Yes	02_002	18FEB12	18FEB2012				No		Yes	No			No					02	Entered	41	Male	06NOV15	109	MF4637	<250 mg/day	No	Yes	>=250 mg/day	No	Yes	Yes	Yes	Yes
Visit 2	1	Von Willebrand disease	blood/bleeding disorders	Yes	Yes	02_002	16APR15	16APR2015					No										02	Entered	41	Male	06NOV15	109	MF4637	<250 mg/day	No	Yes	>=250 mg/day	No	Yes	Yes	Yes	Yes
Visit 2	2	Mixed hypercholesterolemia and hypertriglyceridemia	cardiovascular	Yes	Yes	02_002	18FEB12	18FEB2012					No										02	Entered	41	Male	06NOV15	109	MF4637	<250 mg/day	No	Yes	>=250 mg/day	No	Yes	Yes	Yes	Yes
Visit 2	3	Other abnormal glucose	endocrine	Yes	Yes	02_002	08MAR12	08MAR2012					No										02	Entered	41	Male	06NOV15	109	MF4637	<250 mg/day	No	Yes	>=250 mg/day	No	Yes	Yes	Yes	Yes
Visit 2	4	Pure hyperglyceridemia	cardiovascular	Yes	Yes	02_002	08MAR12	08MAR2012					No										02	Entered	41	Male	06NOV15	109	MF4637	<250 mg/day	No	Yes	>=250 mg/day	No	Yes	Yes	Yes	Yes
Visit 2	5	Essential (primary) hypertension	cardiovascular	Yes	Yes	02_002	18FEB12	18FEB2012					No										02	Entered	41	Male	06NOV15	109	MF4637	<250 mg/day	No	Yes	>=250 mg/day	No	Yes	Yes	Yes	Yes
Visit 2	6	Nonspecific abnormal results of function study of liver	liver	Yes	Yes	02_002	16APR15	16APR2015					No										02	Entered	41	Male	06NOV15	109	MF4637	<250 mg/day	No	Yes	>=250 mg/day	No	Yes	Yes	Yes	Yes
Visit 2	7	Tonsillectomy	surgeries	N/A		02_002	01OCT84	01OCT1984	01OCT84	01OCT1984			No										02	Entered	41	Male	06NOV15	109	MF4637	<250 mg/day	No	Yes	>=250 mg/day	No	Yes	Yes	Yes	Yes
Visit 2	8	Procedure on left hand	surgeries	N/A	No	02_002	18JUN13	18JUN2013					No										02	Entered	41	Male	06NOV15	109	MF4637	<250 mg/day	No	Yes	>=250 mg/day	No	Yes	Yes	Yes	Yes
Visit 1	1	Type 2 diabetes mellitus without complication	endocrine	Yes	Yes	02_003	09JUN08	09JUN2008				Yes		Yes	No			No					02	Entered	58	Male	03NOV15	110	Placebo	>=250 mg/day	Yes	Yes	<250 mg/day	No	Yes	Yes	Yes	Yes
Visit 1	2	Essential (primary) hypertension	cardiovascular	Yes	Yes	02_003	18MAR00	18MAR2000				Yes		Yes	No			No					02	Entered	58	Male	03NOV15	110	Placebo	>=250 mg/day	Yes	Yes	<250 mg/day	No	Yes	Yes	Yes	Yes
Visit 1	3	Gout	musculoskeletal	Yes	Yes	02_003	09SEP90	09SEP1990				Yes		Yes	No			No					02	Entered	58	Male	03NOV15	110	Placebo	>=250 mg/day	Yes	Yes	<250 mg/day	No	Yes	Yes	Yes	Yes
Visit 1	4	Erectile dysfunction	cardiovascular	Yes	Yes	02_003	12NOV14	12NOV2014				Yes		Yes	No			No					02	Entered	58	Male	03NOV15	110	Placebo	>=250 mg/day	Yes	Yes	<250 mg/day	No	Yes	Yes	Yes	Yes
Visit 1	5	Mixed Hyperlipidemia	cardiovascular	Yes	Yes	02_003	20NOV01	20NOV2001				Yes		Yes	No			No					02	Entered	58	Male	03NOV15	110	Placebo	>=250 mg/day	Yes	Yes	<250 mg/day	No	Yes	Yes	Yes	Yes
Visit 1	6	Colonoscopy	surgeries	N/A	No	02_003	21DEC12	21DEC2012				Yes		Yes	No			No					02	Entered	58	Male	03NOV15	110	Placebo	>=250 mg/day	Yes	Yes	<250 mg/day	No	Yes	Yes	Yes	Yes
Visit 1	7	Polyp	gastrointestinal	Yes	Yes	02_003	01JAN07	01JAN2007				Yes		Yes	No			No					02	Entered	58	Male	03NOV15	110	Placebo	>=250 mg/day	Yes	Yes	<250 mg/day	No	Yes	Yes	Yes	Yes
Visit 1	8	Ganglion cyst	musculoskeletal	N/A	No	02_003	01JAN68	01JAN1968				Yes		Yes	No			No					02	Entered	58	Male	03NOV15	110	Placebo	>=250 mg/day	Yes	Yes	<250 mg/day	No	Yes	Yes	Yes	Yes
Visit 1	9	NAFLD	liver	Yes	Yes	02_003	29NOV12	29NOV2012				Yes		Yes	No			No					02	Entered	58	Male	03NOV15	110	Placebo	>=250 mg/day	Yes	Yes	<250 mg/day	No	Yes	Yes	Yes	Yes
Visit 2	1	Type 2 diabetes mellitus without complication	endocrine	Yes	Yes	02_003	09JUN08	09JUN2008					No										02	Entered	58	Male	03NOV15	110	Placebo	>=250 mg/day	Yes	Yes	<250 mg/day	No	Yes	Yes	Yes	Yes
Visit 2	2	Essential (primary) hypertension	cardiovascular	Yes	Yes	02_003	18MAR00	18MAR2000					No										02	Entered	58	Male	03NOV15	110	Placebo	>=250 mg/day	Yes	Yes	<250 mg/day	No	Yes	Yes	Yes	Yes
Visit 2	3	Gout	musculoskeletal	Yes	Yes	02_003	09SEP90	09SEP1990					No										02	Entered	58	Male	03NOV15	110	Placebo	>=250 mg/day	Yes	Yes	<250 mg/day	No	Yes	Yes	Yes	Yes
Visit 2	4	Erectile dysfunction	cardiovascular	Yes	Yes	02_003	12NOV14	12NOV2014					No										02	Entered	58	Male	03NOV15	110	Placebo	>=250 mg/day	Yes	Yes	<250 mg/day	No	Yes	Yes	Yes	Yes
Visit 2	5	Mixed Hyperlipidemia	cardiovascular	Yes	Yes	02_003	20NOV01	20NOV2001					No										02	Entered	58	Male	03NOV15	110	Placebo	>=250 mg/day	Yes	Yes	<250 mg/day	No	Yes	Yes	Yes	Yes
Visit 2	6	Colonoscopy	surgeries	N/A	No	02_003	21DEC12	21DEC2012					No										02	Entered	58	Male	03NOV15	110	Placebo	>=250 mg/day	Yes	Yes	<250 mg/day	No	Yes	Yes	Yes	Yes
Visit 2	7	Polyp	gastrointestinal	Yes	Yes	02_003	01JAN07	01JAN2007					No										02	Entered	58	Male	03NOV15	110	Placebo	>=250 mg/day	Yes	Yes	<250 mg/day	No	Yes	Yes	Yes	Yes
Visit 2	8	Ganglion cyst	musculoskeletal	N/A	No	02_003	01JAN68	01JAN1968					No										02	Entered	58	Male	03NOV15	110	Placebo	>=250 mg/day	Yes	Yes	<250 mg/day	No	Yes	Yes	Yes	Yes
Visit 1	1	Cholecystectomy	surgeries	N/A		02_004	01JAN08	01JAN2008	01JAN08	01JAN2008		Yes		Yes	No			No					02	Early Termination	60	Female	12NOV15	111	Placebo	<250 mg/day	Yes	Yes	<250 mg/day	No	Yes	Yes	Yes	Yes
Visit 1	2	Hysterectomy	surgeries	N/A		02_004	01JAN90	01JAN1990	01JAN90	01JAN1990		Yes		Yes	No			No					02	Early Termination	60	Female	12NOV15	111	Placebo	<250 mg/day	Yes	Yes	<250 mg/day	No	Yes	Yes	Yes	Yes
Visit 1	3	Uterine Suspension	surgeries	N/A		02_004	11JAN78	11JAN1978	11JAN78	11JAN1978		Yes		Yes	No			No					02	Early Termination	60	Female	12NOV15	111	Placebo	<250 mg/day	Yes	Yes	<250 mg/day	No	Yes	Yes	Yes	Yes
Visit 1	4	Appendectomy	surgeries	N/A		02_004	11JAN78	11JAN1978	11JAN78	11JAN1978		Yes		Yes	No			No					02	Early Termination	60	Female	12NOV15	111	Placebo	<250 mg/day	Yes	Yes	<250 mg/day	No	Yes	Yes	Yes	Yes
Visit 1	5	Type II Diabetes Mellitus	liver	Yes	Yes	02_004	14SEP08	14SEP2008				Yes		Yes	No			No					02	Early Termination	60	Female	12NOV15	111	Placebo	<250 mg/day	Yes	Yes	<250 mg/day	No	Yes	Yes	Yes	Yes
Visit 1	6	Hypokalemia	cardiovascular	Yes	Yes	02_004	21JUN11	21JUN2011				Yes		Yes	No			No					02	Early Termination	60	Female	12NOV15	111	Placebo	<250 mg/day	Yes	Yes	<250 mg/day	No	Yes	Yes	Yes	Yes
Visit 1	7	Osteoarthritis	musculoskeletal	Yes	Yes	02_004	11APR09	11APR2009				Yes		Yes	No			No					02	Early Termination	60	Female	12NOV15	111	Placebo	<250 mg/day	Yes	Yes	<250 mg/day	No	Yes	Yes	Yes	Yes
Visit 1	8	Kidney Stones	genital/urinary	Yes	No	02_004	24FEB06	24FEB2006				Yes		Yes	No			No					02	Early Termination	60	Female	12NOV15	111	Placebo	<250 mg/day	Yes	Yes	<250 mg/day	No	Yes	Yes	Yes	Yes
Visit 1	9	Gastoesophageal Reflux Disease	gastrointestinal	Yes	Yes	02_004	24FEB06	24FEB2006				Yes		Yes	No			No					02	Early Termination	60	Female	12NOV15	111	Placebo	<250 mg/day	Yes	Yes	<250 mg/day	No	Yes	Yes	Yes	Yes
Visit 1	10	Hyperlipidemia	cardiovascular	Yes	Yes	02_004	01JAN84	01JAN1984				Yes		Yes	No			No					02	Early Termination	60	Female	12NOV15	111	Placebo	<250 mg/day	Yes	Yes	<250 mg/day	No	Yes	Yes	Yes	Yes
Visit 1	11	Hypertension	cardiovascular	Yes	Yes	02_004	01JAN84	01JAN1984				Yes		Yes	No			No					02	Early Termination	60	Female	12NOV15	111	Placebo	<250 mg/day	Yes	Yes	<250 mg/day	No	Yes	Yes	Yes	Yes
Visit 1	12	NAFLD	liver	Yes	Yes	02_004	11JUN14	11JUN2014				Yes		Yes	No			No					02	Early Termination	60	Female	12NOV15	111	Placebo	<250 mg/day	Yes	Yes	<250 mg/day	No	Yes	Yes	Yes	Yes
Visit 2						02_004							No										02	Early Termination	60	Female	12NOV15	111	Placebo	<250 mg/day	Yes	Yes	<250 mg/day	No	Yes	Yes	Yes	Yes
Visit 1	1	Mallet finger of unspecified finger	musculoskeletal	Yes	Yes	02_005	16JAN13	16JAN2013				No		Yes	No			No					02	Entered	65	Male	04DEC15	112	Placebo	>=250 mg/day	No	No	>=250 mg/day	No	Yes	Yes	Yes	Yes
Visit 1	2	Renal agenesis, bilatera	endocrine	Yes	Yes	02_005	16JUL12	16JUL2012				No		Yes	No			No					02	Entered	65	Male	04DEC15	112	Placebo	>=250 mg/day	No	No	>=250 mg/day	No	Yes	Yes	Yes	Yes
Visit 1	3	Joint disorder	musculoskeletal	Yes	Yes	02_005	01JAN09	01JAN2009				No		Yes	No			No					02	Entered	65	Male	04DEC15	112	Placebo	>=250 mg/day	No	No	>=250 mg/day	No	Yes	Yes	Yes	Yes
Visit 1	4	Diverticulosis of colon with hemorrhage	gastrointestinal	Yes	Yes	02_005	01JAN00	01JAN2000				No		Yes	No			No					02	Entered	65	Male	04DEC15	112	Placebo	>=250 mg/day	No	No	>=250 mg/day	No	Yes	Yes	Yes	Yes
Visit 1	5	Allergic Rhinitis	allergies	Yes	Yes	02_005	01JAN00	01JAN2000				No		Yes	No			No					02	Entered	65	Male	04DEC15	112	Placebo	>=250 mg/day	No	No	>=250 mg/day	No	Yes	Yes	Yes	Yes
Visit 1	6	Esophageal reflux	gastrointestinal	Yes	Yes	02_005	18JUL12	18JUL2012				No		Yes	No			No					02	Entered	65	Male	04DEC15	112	Placebo	>=250 mg/day	No	No	>=250 mg/day	No	Yes	Yes	Yes	Yes
Visit 1	7	Impotence of organic origin	cardiovascular	Yes	Yes	02_005	16OCT12	16OCT2012				No		Yes	No			No					02	Entered	65	Male	04DEC15	112	Placebo	>=250 mg/day	No	No	>=250 mg/day	No	Yes	Yes	Yes	Yes
Visit 1	8	Mixed Hyperlipidemia	cardiovascular	Yes	Yes	02_005	18JUL12	18JUL2012				No		Yes	No			No					02	Entered	65	Male	04DEC15	112	Placebo	>=250 mg/day	No	No	>=250 mg/day	No	Yes	Yes	Yes	Yes
Visit 1	9	Osteoarthrosis	musculoskeletal	Yes	Yes	02_005	18JUL12	18JUL2012				No		Yes	No			No					02	Entered	65	Male	04DEC15	112	Placebo	>=250 mg/day	No	No	>=250 mg/day	No	Yes	Yes	Yes	Yes
Visit 1	10	Other testicular hypofunction	genital/urinary	Yes	Yes	02_005	18JUL12	18JUL2012				No		Yes	No			No					02	Entered	65	Male	04DEC15	112	Placebo	>=250 mg/day	No	No	>=250 mg/day	No	Yes	Yes	Yes	Yes
Visit 1	11	Colonoscopy	surgeries	N/A	No	02_005	01JAN00	01JAN2000				No		Yes	No			No					02	Entered	65	Male	04DEC15	112	Placebo	>=250 mg/day	No	No	>=250 mg/day	No	Yes	Yes	Yes	Yes
Visit 1	12	Colonoscopy	surgeries	N/A	No	02_005	01JAN00	01JAN2000				No		Yes	No			No					02	Entered	65	Male	04DEC15	112	Placebo	>=250 mg/day	No	No	>=250 mg/day	No	Yes	Yes	Yes	Yes
Visit 1	13	Cholecystecomy	surgeries	N/A	No	02_005	08JAN06	08JAN2006				No		Yes	No			No					02	Entered	65	Male	04DEC15	112	Placebo	>=250 mg/day	No	No	>=250 mg/day	No	Yes	Yes	Yes	Yes
Visit 1	14	gout	musculoskeletal	Yes	Yes	02_005	01JAN99	01JAN1999				No		Yes	No			No					02	Entered	65	Male	04DEC15	112	Placebo	>=250 mg/day	No	No	>=250 mg/day	No	Yes	Yes	Yes	Yes
Visit 1	15	NAFLD	liver	Yes	Yes	02_005	11SEP13	11SEP2013				No		Yes	No			No					02	Entered	65	Male	04DEC15	112	Placebo	>=250 mg/day	No	No	>=250 mg/day	No	Yes	Yes	Yes	Yes
Visit 2	1	Mallet finger of unspecified finger	musculoskeletal	Yes	Yes	02_005	16JAN13	16JAN2013					No										02	Entered	65	Male	04DEC15	112	Placebo	>=250 mg/day	No	No	>=250 mg/day	No	Yes	Yes	Yes	Yes
Visit 2	2	Renal agenesis, bilatera	endocrine	Yes	Yes	02_005	16JUL12	16JUL2012					No										02	Entered	65	Male	04DEC15	112	Placebo	>=250 mg/day	No	No	>=250 mg/day	No	Yes	Yes	Yes	Yes
Visit 2	3	Joint disorder	musculoskeletal	Yes	Yes	02_005	01JAN09	01JAN2009					No										02	Entered	65	Male	04DEC15	112	Placebo	>=250 mg/day	No	No	>=250 mg/day	No	Yes	Yes	Yes	Yes
Visit 2	4	Diverticulosis of colon with hemorrhage	gastrointestinal	Yes	Yes	02_005	01JAN00	01JAN2000					No										02	Entered	65	Male	04DEC15	112	Placebo	>=250 mg/day	No	No	>=250 mg/day	No	Yes	Yes	Yes	Yes
Visit 2	5	Allergic Rhinitis	allergies	Yes	Yes	02_005	01JAN00	01JAN2000					No										02	Entered	65	Male	04DEC15	112	Placebo	>=250 mg/day	No	No	>=250 mg/day	No	Yes	Yes	Yes	Yes
Visit 2	6	Esophageal reflux	gastrointestinal	Yes	Yes	02_005	18JUL12	18JUL2012					No										02	Entered	65	Male	04DEC15	112	Placebo	>=250 mg/day	No	No	>=250 mg/day	No	Yes	Yes	Yes	Yes
Visit 2	7	Impotence of organic origin	cardiovascular	Yes	Yes	02_005	16OCT12	16OCT2012					No										02	Entered	65	Male	04DEC15	112	Placebo	>=250 mg/day	No	No	>=250 mg/day	No	Yes	Yes	Yes	Yes
Visit 2	8	Mixed Hyperlipidemia	cardiovascular	Yes	Yes	02_005	18JUL12	18JUL2012					No										02	Entered	65	Male	04DEC15	112	Placebo	>=250 mg/day	No	No	>=250 mg/day	No	Yes	Yes	Yes	Yes
Visit 2	9	Osteoarthrosis	musculoskeletal	Yes	Yes	02_005	18JUL12	18JUL2012					No										02	Entered	65	Male	04DEC15	112	Placebo	>=250 mg/day	No	No	>=250 mg/day	No	Yes	Yes	Yes	Yes
Visit 2	10	Other testicular hypofunction	genital/urinary	Yes	Yes	02_005	18JUL12	18JUL2012					No										02	Entered	65	Male	04DEC15	112	Placebo	>=250 mg/day	No	No	>=250 mg/day	No	Yes	Yes	Yes	Yes
Visit 2	11	Colonoscopy	surgeries	N/A	No	02_005	01JAN00	01JAN2000					No										02	Entered	65	Male	04DEC15	112	Placebo	>=250 mg/day	No	No	>=250 mg/day	No	Yes	Yes	Yes	Yes
Visit 2	12	Colonoscopy	surgeries	N/A	No	02_005	01JAN00	01JAN2000					No										02	Entered	65	Male	04DEC15	112	Placebo	>=250 mg/day	No	No	>=250 mg/day	No	Yes	Yes	Yes	Yes
Visit 2	13	Cholecystecomy	surgeries	N/A	No	02_005	08JAN06	08JAN2006					No										02	Entered	65	Male	04DEC15	112	Placebo	>=250 mg/day	No	No	>=250 mg/day	No	Yes	Yes	Yes	Yes
Visit 2	14	gout	musculoskeletal	Yes	Yes	02_005	01JAN99	01JAN1999					No										02	Entered	65	Male	04DEC15	112	Placebo	>=250 mg/day	No	No	>=250 mg/day	No	Yes	Yes	Yes	Yes
Visit 1	1	Gastroesophageal reflux disease	gastrointestinal	Yes	Yes	02_006	29OCT13	29OCT2013				No		Yes	No			No					02	Screen Failure	39	Female							<250 mg/day	Yes	No	No	No	No
Visit 1	2	Hyperlipidemia	cardiovascular	Yes	Yes	02_006	29OCT13	29OCT2013				No		Yes	No			No					02	Screen Failure	39	Female							<250 mg/day	Yes	No	No	No	No
Visit 1	3	Hypertension	cardiovascular	Yes	Yes	02_006	29OCT13	29OCT2013				No		Yes	No			No					02	Screen Failure	39	Female							<250 mg/day	Yes	No	No	No	No
Visit 1	4	Other abnormal glucose	endocrine	Yes	Yes	02_006	28JAN14	28JAN2014				No		Yes	No			No					02	Screen Failure	39	Female							<250 mg/day	Yes	No	No	No	No
Visit 1	5	NAFLD	liver	Yes	Yes	02_006	29OCT13	29OCT2013				No		Yes	No			No					02	Screen Failure	39	Female							<250 mg/day	Yes	No	No	No	No
Visit 2						03_001							No										03	Early Termination	53	Male	19NOV15	117	MF4637	<250 mg/day	No	No	>=250 mg/day	No	Yes	Yes	No	No
Visit 1	1	Insomnia	neurological	Yes	Yes	03_002	08JUN80	08JUN1980				No		Yes	Yes		Ultrasound	No	01MAY15	01MAY2015			03	Early Termination	52	Female	30OCT15	116	Placebo	<250 mg/day	No	No	<250 mg/day	No	Yes	Yes	Yes	Yes
Visit 1	2	Sore Throat	eyes, ears, nose, throat	Yes		03_002	10FEB15	10FEB2015	25DEC15	25DEC2015		No		Yes	Yes		Ultrasound	No	01MAY15	01MAY2015			03	Early Termination	52	Female	30OCT15	116	Placebo	<250 mg/day	No	No	<250 mg/day	No	Yes	Yes	Yes	Yes
Visit 1	3	Arthritis	musculoskeletal	Yes	Yes	03_002	09JUL05	09JUL2005				No		Yes	Yes		Ultrasound	No	01MAY15	01MAY2015			03	Early Termination	52	Female	30OCT15	116	Placebo	<250 mg/day	No	No	<250 mg/day	No	Yes	Yes	Yes	Yes
Visit 1	4	Chronic Diarrhea	gastrointestinal	Yes	Yes	03_002	10APR05	10APR2005				No		Yes	Yes		Ultrasound	No	01MAY15	01MAY2015			03	Early Termination	52	Female	30OCT15	116	Placebo	<250 mg/day	No	No	<250 mg/day	No	Yes	Yes	Yes	Yes
Visit 1	5	Hot Flashes	endocrine	Yes	Yes	03_002	07APR05	07APR2005				No		Yes	Yes		Ultrasound	No	01MAY15	01MAY2015			03	Early Termination	52	Female	30OCT15	116	Placebo	<250 mg/day	No	No	<250 mg/day	No	Yes	Yes	Yes	Yes
Visit 1	7	gout	immunological	Yes	No	03_002		1968				No		Yes	Yes		Ultrasound	No	01MAY15	01MAY2015			03	Early Termination	52	Female	30OCT15	116	Placebo	<250 mg/day	No	No	<250 mg/day	No	Yes	Yes	Yes	Yes
Visit 1	8	chronic neck pain	musculoskeletal	Yes	Yes	03_002	09JUL00	09JUL2000				No		Yes	Yes		Ultrasound	No	01MAY15	01MAY2015			03	Early Termination	52	Female	30OCT15	116	Placebo	<250 mg/day	No	No	<250 mg/day	No	Yes	Yes	Yes	Yes
Visit 1	9	chronic shoulder pain	musculoskeletal	Yes	Yes	03_002		2000				No		Yes	Yes		Ultrasound	No	01MAY15	01MAY2015			03	Early Termination	52	Female	30OCT15	116	Placebo	<250 mg/day	No	No	<250 mg/day	No	Yes	Yes	Yes	Yes
Visit 1	10	mouth ulcer	oral	Yes	No	03_002	05MAY14	05MAY2014				No		Yes	Yes		Ultrasound	No	01MAY15	01MAY2015			03	Early Termination	52	Female	30OCT15	116	Placebo	<250 mg/day	No	No	<250 mg/day	No	Yes	Yes	Yes	Yes
Visit 1	11	cholecystectomy	surgeries	Yes	No	03_002		APR2005				No		Yes	Yes		Ultrasound	No	01MAY15	01MAY2015			03	Early Termination	52	Female	30OCT15	116	Placebo	<250 mg/day	No	No	<250 mg/day	No	Yes	Yes	Yes	Yes
Visit 1	12	ear reconstruction	surgeries	Yes	No	03_002		1979				No		Yes	Yes		Ultrasound	No	01MAY15	01MAY2015			03	Early Termination	52	Female	30OCT15	116	Placebo	<250 mg/day	No	No	<250 mg/day	No	Yes	Yes	Yes	Yes
Visit 1	13	ear reconstruction	surgeries	Yes	No	03_002		1992				No		Yes	Yes		Ultrasound	No	01MAY15	01MAY2015			03	Early Termination	52	Female	30OCT15	116	Placebo	<250 mg/day	No	No	<250 mg/day	No	Yes	Yes	Yes	Yes
Visit 1	14	asthma	eyes, ears, nose, throat	Yes	Yes	03_002		1983				No		Yes	Yes		Ultrasound	No	01MAY15	01MAY2015			03	Early Termination	52	Female	30OCT15	116	Placebo	<250 mg/day	No	No	<250 mg/day	No	Yes	Yes	Yes	Yes
Visit 1	15	TOENAIl. FUNGAS	dermatological	Yes	Yes	03_002	01JUN15	01JUN2015				No		Yes	Yes		Ultrasound	No	01MAY15	01MAY2015			03	Early Termination	52	Female	30OCT15	116	Placebo	<250 mg/day	No	No	<250 mg/day	No	Yes	Yes	Yes	Yes
Visit 1	16	hysteroctomy	surgeries	Yes		03_002		APR2007		APR2007		No		Yes	Yes		Ultrasound	No	01MAY15	01MAY2015			03	Early Termination	52	Female	30OCT15	116	Placebo	<250 mg/day	No	No	<250 mg/day	No	Yes	Yes	Yes	Yes
Visit 2						03_002							No										03	Early Termination	52	Female	30OCT15	116	Placebo	<250 mg/day	No	No	<250 mg/day	No	Yes	Yes	Yes	Yes
Visit 1	1	pre diabetic	endocrine	N/A	Yes	03_003		SEP2015				No		Yes	Yes		Ultrasound	No	15OCT15	15OCT2015			03	Entered	25	Male	24NOV15	121	MF4637	<250 mg/day	No	No	<250 mg/day	No	Yes	Yes	Yes	Yes
Visit 1	3	cholelithiasis	gastrointestinal	Yes	Yes	03_003		OCT2015				No		Yes	Yes		Ultrasound	No	15OCT15	15OCT2015			03	Entered	25	Male	24NOV15	121	MF4637	<250 mg/day	No	No	<250 mg/day	No	Yes	Yes	Yes	Yes
Visit 1	4	obesity	endocrine	Yes	Yes	03_003	13AUG15	13AUG2015				No		Yes	Yes		Ultrasound	No	15OCT15	15OCT2015			03	Entered	25	Male	24NOV15	121	MF4637	<250 mg/day	No	No	<250 mg/day	No	Yes	Yes	Yes	Yes
Visit 1	5	PANIC ATTACKS	psychological	Yes	Yes	03_003		AUG2015				No		Yes	Yes		Ultrasound	No	15OCT15	15OCT2015			03	Entered	25	Male	24NOV15	121	MF4637	<250 mg/day	No	No	<250 mg/day	No	Yes	Yes	Yes	Yes
Visit 1	6	ACUTE TONSITIS	eyes, ears, nose, throat	Yes	No	03_003		AUG2015				No		Yes	Yes		Ultrasound	No	15OCT15	15OCT2015			03	Entered	25	Male	24NOV15	121	MF4637	<250 mg/day	No	No	<250 mg/day	No	Yes	Yes	Yes	Yes
Visit 1	8	GALLSTONES	gastrointestinal	Yes	No	03_003	15OCT15	15OCT2015				No		Yes	Yes		Ultrasound	No	15OCT15	15OCT2015			03	Entered	25	Male	24NOV15	121	MF4637	<250 mg/day	No	No	<250 mg/day	No	Yes	Yes	Yes	Yes
Visit 1	9	bronchritis	eyes, ears, nose, throat	No	No	03_003		10UNK2015				No		Yes	Yes		Ultrasound	No	15OCT15	15OCT2015			03	Entered	25	Male	24NOV15	121	MF4637	<250 mg/day	No	No	<250 mg/day	No	Yes	Yes	Yes	Yes
Visit 2						03_003							No										03	Entered	25	Male	24NOV15	121	MF4637	<250 mg/day	No	No	<250 mg/day	No	Yes	Yes	Yes	Yes
Visit 1	6	hypertension	cardiovascular	Yes	Yes	03_004		1975				Yes		Yes	Yes		Ultrasound	No	16NOV15	16NOV2015			03	Entered	56	Female	24NOV15	118	Placebo	<250 mg/day	No	No	>=250 mg/day	No	Yes	Yes	Yes	Yes
Visit 1	7	GENITAL WARTS	genital/urinary	Yes	No	03_004		1994				Yes		Yes	Yes		Ultrasound	No	16NOV15	16NOV2015			03	Entered	56	Female	24NOV15	118	Placebo	<250 mg/day	No	No	>=250 mg/day	No	Yes	Yes	Yes	Yes
Visit 1	8	DIABETES	endocrine	Yes	Yes	03_004		2006				Yes		Yes	Yes		Ultrasound	No	16NOV15	16NOV2015			03	Entered	56	Female	24NOV15	118	Placebo	<250 mg/day	No	No	>=250 mg/day	No	Yes	Yes	Yes	Yes
Visit 1	11	ANXIETY	psychological	Yes	Yes	03_004	09SEP13	09SEP2013				Yes		Yes	Yes		Ultrasound	No	16NOV15	16NOV2015			03	Entered	56	Female	24NOV15	118	Placebo	<250 mg/day	No	No	>=250 mg/day	No	Yes	Yes	Yes	Yes
Visit 1	13	INSOMIA	neurological	Yes	Yes	03_004	04APR16	04APR2016				Yes		Yes	Yes		Ultrasound	No	16NOV15	16NOV2015			03	Entered	56	Female	24NOV15	118	Placebo	<250 mg/day	No	No	>=250 mg/day	No	Yes	Yes	Yes	Yes
Visit 1	14	SEASONAL ALLERGIES	allergies	Yes	Yes	03_004	04APR16	04APR2016				Yes		Yes	Yes		Ultrasound	No	16NOV15	16NOV2015			03	Entered	56	Female	24NOV15	118	Placebo	<250 mg/day	No	No	>=250 mg/day	No	Yes	Yes	Yes	Yes
Visit 1	15	PVC pre-venticular contractions	cardiovascular	Yes	Yes	03_004		1998				Yes		Yes	Yes		Ultrasound	No	16NOV15	16NOV2015			03	Entered	56	Female	24NOV15	118	Placebo	<250 mg/day	No	No	>=250 mg/day	No	Yes	Yes	Yes	Yes
Visit 1	17	gallbladder polyp	gastrointestinal	Yes	No	03_004	15DEC15	15DEC2015				Yes		Yes	Yes		Ultrasound	No	16NOV15	16NOV2015			03	Entered	56	Female	24NOV15	118	Placebo	<250 mg/day	No	No	>=250 mg/day	No	Yes	Yes	Yes	Yes
Visit 1	18	high cholestol	cardiovascular	Yes	Yes	03_004	16JAN07	16JAN2007				Yes		Yes	Yes		Ultrasound	No	16NOV15	16NOV2015			03	Entered	56	Female	24NOV15	118	Placebo	<250 mg/day	No	No	>=250 mg/day	No	Yes	Yes	Yes	Yes
Visit 1	20	depression	psychological	Yes		03_004	09SEP03	09SEP2003	15DEC15	15DEC2015		Yes		Yes	Yes		Ultrasound	No	16NOV15	16NOV2015			03	Entered	56	Female	24NOV15	118	Placebo	<250 mg/day	No	No	>=250 mg/day	No	Yes	Yes	Yes	Yes
Visit 1	21	hepatomegely	liver	Yes	Yes	03_004		11UNK2016				Yes		Yes	Yes		Ultrasound	No	16NOV15	16NOV2015			03	Entered	56	Female	24NOV15	118	Placebo	<250 mg/day	No	No	>=250 mg/day	No	Yes	Yes	Yes	Yes
Visit 1	22	obesity	endocrine	Yes	Yes	03_004	08NOV99	08NOV1999				Yes		Yes	Yes		Ultrasound	No	16NOV15	16NOV2015			03	Entered	56	Female	24NOV15	118	Placebo	<250 mg/day	No	No	>=250 mg/day	No	Yes	Yes	Yes	Yes
Visit 2						03_004							No										03	Entered	56	Female	24NOV15	118	Placebo	<250 mg/day	No	No	>=250 mg/day	No	Yes	Yes	Yes	Yes
Visit 1	1	hypothyroidism	immunological	Yes	Yes	03_005	08AUG15	08AUG2015				No		Yes	Yes		Ultrasound	No	11APR15	11APR2015			03	Early Termination	49	Female	25NOV15	119	MF4637	>=250 mg/day	No	No	<250 mg/day	No	Yes	Yes	Yes	Yes
Visit 1	2	headaches	neurological	N/A	Yes	03_005	04AUG15	04AUG2015				No		Yes	Yes		Ultrasound	No	11APR15	11APR2015			03	Early Termination	49	Female	25NOV15	119	MF4637	>=250 mg/day	No	No	<250 mg/day	No	Yes	Yes	Yes	Yes
Visit 1	3	allergic rhinitis	allergies	Yes	Yes	03_005	13JAN16	13JAN2016				No		Yes	Yes		Ultrasound	No	11APR15	11APR2015			03	Early Termination	49	Female	25NOV15	119	MF4637	>=250 mg/day	No	No	<250 mg/day	No	Yes	Yes	Yes	Yes
Visit 1	4	depression	psychological	Yes	Yes	03_005	04AUG15	04AUG2015				No		Yes	Yes		Ultrasound	No	11APR15	11APR2015			03	Early Termination	49	Female	25NOV15	119	MF4637	>=250 mg/day	No	No	<250 mg/day	No	Yes	Yes	Yes	Yes
Visit 1	5	anxiety	psychological	Yes	Yes	03_005	04AUG15	04AUG2015				No		Yes	Yes		Ultrasound	No	11APR15	11APR2015			03	Early Termination	49	Female	25NOV15	119	MF4637	>=250 mg/day	No	No	<250 mg/day	No	Yes	Yes	Yes	Yes
Visit 1	6	gerd	gastrointestinal	Yes	Yes	03_005	04AUG15	04AUG2015				No		Yes	Yes		Ultrasound	No	11APR15	11APR2015			03	Early Termination	49	Female	25NOV15	119	MF4637	>=250 mg/day	No	No	<250 mg/day	No	Yes	Yes	Yes	Yes
Visit 1	7	hypertension	cardiovascular	Yes	Yes	03_005	26FEB16	26FEB2016				No		Yes	Yes		Ultrasound	No	11APR15	11APR2015			03	Early Termination	49	Female	25NOV15	119	MF4637	>=250 mg/day	No	No	<250 mg/day	No	Yes	Yes	Yes	Yes
Visit 1	8	chronic kidney disease 3	endocrine	Yes	Yes	03_005	26FEB16	26FEB2016				No		Yes	Yes		Ultrasound	No	11APR15	11APR2015			03	Early Termination	49	Female	25NOV15	119	MF4637	>=250 mg/day	No	No	<250 mg/day	No	Yes	Yes	Yes	Yes
Visit 1	9	Irriable bowel syndrom	gastrointestinal	Yes	Yes	03_005	27APR12	27APR2012				No		Yes	Yes		Ultrasound	No	11APR15	11APR2015			03	Early Termination	49	Female	25NOV15	119	MF4637	>=250 mg/day	No	No	<250 mg/day	No	Yes	Yes	Yes	Yes
Visit 1	11	pre-diabetic	endocrine	N/A	Yes	03_005	26FEB16	26FEB2016				No		Yes	Yes		Ultrasound	No	11APR15	11APR2015			03	Early Termination	49	Female	25NOV15	119	MF4637	>=250 mg/day	No	No	<250 mg/day	No	Yes	Yes	Yes	Yes
Visit 1	12	VITIAMIN D DEFIEICIENCY	endocrine	Yes	Yes	03_005	20FEB16	20FEB2016				No		Yes	Yes		Ultrasound	No	11APR15	11APR2015			03	Early Termination	49	Female	25NOV15	119	MF4637	>=250 mg/day	No	No	<250 mg/day	No	Yes	Yes	Yes	Yes
Visit 1	13	TUBULAR ADENOMA	surgeries	Yes		03_005		FEB2012		FEB2012		No		Yes	Yes		Ultrasound	No	11APR15	11APR2015			03	Early Termination	49	Female	25NOV15	119	MF4637	>=250 mg/day	No	No	<250 mg/day	No	Yes	Yes	Yes	Yes
Visit 1	14	TONSILLECTOMY	surgeries	Yes	No	03_005		1998				No		Yes	Yes		Ultrasound	No	11APR15	11APR2015			03	Early Termination	49	Female	25NOV15	119	MF4637	>=250 mg/day	No	No	<250 mg/day	No	Yes	Yes	Yes	Yes
Visit 1	15	C- SECTION	surgeries	N/A	No	03_005		1998				No		Yes	Yes		Ultrasound	No	11APR15	11APR2015			03	Early Termination	49	Female	25NOV15	119	MF4637	>=250 mg/day	No	No	<250 mg/day	No	Yes	Yes	Yes	Yes
Visit 1	16	NASAL SURGERY	surgeries	Yes	No	03_005		1998				No		Yes	Yes		Ultrasound	No	11APR15	11APR2015			03	Early Termination	49	Female	25NOV15	119	MF4637	>=250 mg/day	No	No	<250 mg/day	No	Yes	Yes	Yes	Yes
Visit 2						03_005							No										03	Early Termination	49	Female	25NOV15	119	MF4637	>=250 mg/day	No	No	<250 mg/day	No	Yes	Yes	Yes	Yes
Visit 1	1	HYPERTENSION	cardiovascular	Yes	Yes	03_006	30DEC15	30DEC2015				Yes		Yes	Yes		Ultrasound	No	14OCT15	14OCT2015			03	Screen Failure	51	Male							<250 mg/day	Yes	No	No	No	No
Visit 1	2	bells palsy	neurological	N/A	No	03_006	30DEC15	30DEC2015				Yes		Yes	Yes		Ultrasound	No	14OCT15	14OCT2015			03	Screen Failure	51	Male							<250 mg/day	Yes	No	No	No	No
Visit 1	3	migraines	neurological	Yes	Yes	03_006	15DEC15	15DEC2015				Yes		Yes	Yes		Ultrasound	No	14OCT15	14OCT2015			03	Screen Failure	51	Male							<250 mg/day	Yes	No	No	No	No
Visit 1	4	diabetes II	endocrine	Yes	Yes	03_006	05OCT15	05OCT2015				Yes		Yes	Yes		Ultrasound	No	14OCT15	14OCT2015			03	Screen Failure	51	Male							<250 mg/day	Yes	No	No	No	No
Visit 1	5	high chol	cardiovascular	Yes	Yes	03_006	05OCT15	05OCT2015				Yes		Yes	Yes		Ultrasound	No	14OCT15	14OCT2015			03	Screen Failure	51	Male							<250 mg/day	Yes	No	No	No	No
Visit 1	7	GALLBLADDER POLYP	gastrointestinal	Yes		03_006	05OCT15	05OCT2015	05OCT15	05OCT2015		Yes		Yes	Yes		Ultrasound	No	14OCT15	14OCT2015			03	Screen Failure	51	Male							<250 mg/day	Yes	No	No	No	No
Visit 1	9	ERECTILE DISFUNCTION	genital/urinary	Yes	Yes	03_006	04JUN10	04JUN2010				Yes		Yes	Yes		Ultrasound	No	14OCT15	14OCT2015			03	Screen Failure	51	Male							<250 mg/day	Yes	No	No	No	No
Visit 1	10	APPENDECTOMY	surgeries	Yes		03_006		2000		2000		Yes		Yes	Yes		Ultrasound	No	14OCT15	14OCT2015			03	Screen Failure	51	Male							<250 mg/day	Yes	No	No	No	No
Visit 1	11	VASECTOMY	surgeries	Yes		03_006		1994		1994		Yes		Yes	Yes		Ultrasound	No	14OCT15	14OCT2015			03	Screen Failure	51	Male							<250 mg/day	Yes	No	No	No	No
Visit 1	12	ALCOHOLISM	liver	No	Yes	03_006		2005				Yes		Yes	Yes		Ultrasound	No	14OCT15	14OCT2015			03	Screen Failure	51	Male							<250 mg/day	Yes	No	No	No	No
Visit 1	1	sinus surgery	eyes, ears, nose, throat	N/A		03_007		2015		2015		No		Yes	Yes		Ultrasound	No	05NOV15	05NOV2015			03	Entered	40	Male	19NOV15	120	Placebo	<250 mg/day	No	No	<250 mg/day	No	Yes	Yes	Yes	No
Visit 1	2	TONSILLECTOMY	surgeries	Yes		03_007		08UNK2015		08UNK2015		No		Yes	Yes		Ultrasound	No	05NOV15	05NOV2015			03	Entered	40	Male	19NOV15	120	Placebo	<250 mg/day	No	No	<250 mg/day	No	Yes	Yes	Yes	No
Visit 1	3	OBESITY	endocrine	N/A	Yes	03_007	28SEP12	28SEP2012				No		Yes	Yes		Ultrasound	No	05NOV15	05NOV2015			03	Entered	40	Male	19NOV15	120	Placebo	<250 mg/day	No	No	<250 mg/day	No	Yes	Yes	Yes	No
Visit 1	4	high cholesterol	cardiovascular	Yes	Yes	03_007	05NOV15	05NOV2015				No		Yes	Yes		Ultrasound	No	05NOV15	05NOV2015			03	Entered	40	Male	19NOV15	120	Placebo	<250 mg/day	No	No	<250 mg/day	No	Yes	Yes	Yes	No
Visit 1	5	back pain	musculoskeletal	N/A	Yes	03_007		JAN2013				No		Yes	Yes		Ultrasound	No	05NOV15	05NOV2015			03	Entered	40	Male	19NOV15	120	Placebo	<250 mg/day	No	No	<250 mg/day	No	Yes	Yes	Yes	No
Visit 1	6	pre diabetic	endocrine	No	Yes	03_007		SEP2015				No		Yes	Yes		Ultrasound	No	05NOV15	05NOV2015			03	Entered	40	Male	19NOV15	120	Placebo	<250 mg/day	No	No	<250 mg/day	No	Yes	Yes	Yes	No
Visit 1	7	CHRONIC SINUS	eyes, ears, nose, throat	Yes	Yes	03_007	28JAN15	28JAN2015				No		Yes	Yes		Ultrasound	No	05NOV15	05NOV2015			03	Entered	40	Male	19NOV15	120	Placebo	<250 mg/day	No	No	<250 mg/day	No	Yes	Yes	Yes	No
Visit 1	8	Gastroesophageal reflux disease	gastrointestinal	Yes	Yes	03_007		2008				No		Yes	Yes		Ultrasound	No	05NOV15	05NOV2015			03	Entered	40	Male	19NOV15	120	Placebo	<250 mg/day	No	No	<250 mg/day	No	Yes	Yes	Yes	No
Visit 1	9	DEPRESSION	psychological	Yes		03_007	05NOV15	05NOV2015	02FEB16	02FEB2016		No		Yes	Yes		Ultrasound	No	05NOV15	05NOV2015			03	Entered	40	Male	19NOV15	120	Placebo	<250 mg/day	No	No	<250 mg/day	No	Yes	Yes	Yes	No
Visit 1	12	KIDNEY STONE	genital/urinary	Yes		03_007		DEC2013		DEC2013		No		Yes	Yes		Ultrasound	No	05NOV15	05NOV2015			03	Entered	40	Male	19NOV15	120	Placebo	<250 mg/day	No	No	<250 mg/day	No	Yes	Yes	Yes	No
Visit 1	13	aniexty	psychological	Yes		03_007	05NOV15	05NOV2015	02FEB16	02FEB2016		No		Yes	Yes		Ultrasound	No	05NOV15	05NOV2015			03	Entered	40	Male	19NOV15	120	Placebo	<250 mg/day	No	No	<250 mg/day	No	Yes	Yes	Yes	No
Visit 1	14	JOINT DISEASE/ pain DJD	musculoskeletal	Yes	Yes	03_007		JAN2013				No		Yes	Yes		Ultrasound	No	05NOV15	05NOV2015			03	Entered	40	Male	19NOV15	120	Placebo	<250 mg/day	No	No	<250 mg/day	No	Yes	Yes	Yes	No
Visit 1	17	Seasonal allergies	allergies	N/A	Yes	03_007	20MAY16	20MAY2016				No		Yes	Yes		Ultrasound	No	05NOV15	05NOV2015			03	Entered	40	Male	19NOV15	120	Placebo	<250 mg/day	No	No	<250 mg/day	No	Yes	Yes	Yes	No
Visit 2						03_007							No										03	Entered	40	Male	19NOV15	120	Placebo	<250 mg/day	No	No	<250 mg/day	No	Yes	Yes	Yes	No
Visit 1	1	high blood pressure	cardiovascular	Yes	Yes	03_008		06UNK2007				No		Yes	Yes		Ultrasound	No	11MAR15	11MAR2015			03	Screen Failure	46	Male							>=250 mg/day	Yes	No	No	No	No
Visit 1	2	HIGH CHOL	cardiovascular	Yes	Yes	03_008	24FEB14	24FEB2014				No		Yes	Yes		Ultrasound	No	11MAR15	11MAR2015			03	Screen Failure	46	Male							>=250 mg/day	Yes	No	No	No	No
Visit 1	3	BI-POLAR	psychological	Yes	Yes	03_008		JUN2007				No		Yes	Yes		Ultrasound	No	11MAR15	11MAR2015			03	Screen Failure	46	Male							>=250 mg/day	Yes	No	No	No	No
Visit 1	4	DEPRESSION	psychological	Yes	Yes	03_008		JUN2007				No		Yes	Yes		Ultrasound	No	11MAR15	11MAR2015			03	Screen Failure	46	Male							>=250 mg/day	Yes	No	No	No	No
Visit 1	5	DIVERTICULOSIS	gastrointestinal	Yes	Yes	03_008	30SEP11	30SEP2011				No		Yes	Yes		Ultrasound	No	11MAR15	11MAR2015			03	Screen Failure	46	Male							>=250 mg/day	Yes	No	No	No	No
Visit 1	6	SLEEP APNEA	neurological	Yes	Yes	03_008		OCT2012				No		Yes	Yes		Ultrasound	No	11MAR15	11MAR2015			03	Screen Failure	46	Male							>=250 mg/day	Yes	No	No	No	No
Visit 1	7	FATIQUE	neurological	Yes	Yes	03_008		OCT2012				No		Yes	Yes		Ultrasound	No	11MAR15	11MAR2015			03	Screen Failure	46	Male							>=250 mg/day	Yes	No	No	No	No
Visit 1	9	GERD	gastrointestinal	Yes	Yes	03_008	24FEB14	24FEB2014				No		Yes	Yes		Ultrasound	No	11MAR15	11MAR2015			03	Screen Failure	46	Male							>=250 mg/day	Yes	No	No	No	No
Visit 1	10	ERECTILE DYFUNCTION	neurological	Yes	Yes	03_008	12AUG15	12AUG2015				No		Yes	Yes		Ultrasound	No	11MAR15	11MAR2015			03	Screen Failure	46	Male							>=250 mg/day	Yes	No	No	No	No
Visit 1	11	GOUT	musculoskeletal	Yes	Yes	03_008		APR2015				No		Yes	Yes		Ultrasound	No	11MAR15	11MAR2015			03	Screen Failure	46	Male							>=250 mg/day	Yes	No	No	No	No
Visit 1	12	HX OF ALCOHOLISM	psychological	N/A	Yes	03_008		SEP2012				No		Yes	Yes		Ultrasound	No	11MAR15	11MAR2015			03	Screen Failure	46	Male							>=250 mg/day	Yes	No	No	No	No
Visit 1	13	HYPOGONADISM	endocrine	Yes	Yes	03_008		OCT2012				No		Yes	Yes		Ultrasound	No	11MAR15	11MAR2015			03	Screen Failure	46	Male							>=250 mg/day	Yes	No	No	No	No
Visit 1	14	HEPATIC STEATOSIS	liver	N/A	Yes	03_008	12AUG15	12AUG2015				No		Yes	Yes		Ultrasound	No	11MAR15	11MAR2015			03	Screen Failure	46	Male							>=250 mg/day	Yes	No	No	No	No
Visit 1	15	ASTHMA	eyes, ears, nose, throat	Yes	Yes	03_008		APR2015				No		Yes	Yes		Ultrasound	No	11MAR15	11MAR2015			03	Screen Failure	46	Male							>=250 mg/day	Yes	No	No	No	No
Visit 1	2	HYPERTENSION	cardiovascular	Yes	Yes	03_009	21OCT15	21OCT2015				No		Yes	Yes		Ultrasound	No	11NOV15	11NOV2015			03	Entered	40	Male	13JAN16	122	MF4637	<250 mg/day	No	No	>=250 mg/day	No	Yes	Yes	Yes	Yes
Visit 1	3	rt knee torn meniscus	musculoskeletal	N/A	Yes	03_009	06OCT15	06OCT2015				No		Yes	Yes		Ultrasound	No	11NOV15	11NOV2015			03	Entered	40	Male	13JAN16	122	MF4637	<250 mg/day	No	No	>=250 mg/day	No	Yes	Yes	Yes	Yes
Visit 1	4	mild djd back	musculoskeletal	N/A	Yes	03_009	06OCT15	06OCT2015				No		Yes	Yes		Ultrasound	No	11NOV15	11NOV2015			03	Entered	40	Male	13JAN16	122	MF4637	<250 mg/day	No	No	>=250 mg/day	No	Yes	Yes	Yes	Yes
Visit 1	5	cervical radiculopathy	musculoskeletal	N/A	Yes	03_009	13APR16	13APR2016				No		Yes	Yes		Ultrasound	No	11NOV15	11NOV2015			03	Entered	40	Male	13JAN16	122	MF4637	<250 mg/day	No	No	>=250 mg/day	No	Yes	Yes	Yes	Yes
Visit 1	6	GILBERT SYNDOME	liver	Yes	Yes	03_009		2015				No		Yes	Yes		Ultrasound	No	11NOV15	11NOV2015			03	Entered	40	Male	13JAN16	122	MF4637	<250 mg/day	No	No	>=250 mg/day	No	Yes	Yes	Yes	Yes
Visit 1	7	allergic to Avelox	allergies	N/A	Yes	03_009	10MAR16	10MAR2016				No		Yes	Yes		Ultrasound	No	11NOV15	11NOV2015			03	Entered	40	Male	13JAN16	122	MF4637	<250 mg/day	No	No	>=250 mg/day	No	Yes	Yes	Yes	Yes
Visit 2						03_009							No										03	Entered	40	Male	13JAN16	122	MF4637	<250 mg/day	No	No	>=250 mg/day	No	Yes	Yes	Yes	Yes
Visit 1	1	Seasona allergies	allergies	N/A	Yes	03_010	23FEB16	23FEB2016				No		Yes	Yes		Ultrasound	No	28OCT15	28OCT2015			03	Entered	41	Male	12JAN16	123	Placebo	>=250 mg/day	No	No	>=250 mg/day	No	Yes	Yes	Yes	Yes
Visit 1	2	lower back pain	musculoskeletal	Yes	Yes	03_010	15APR15	15APR2015				No		Yes	Yes		Ultrasound	No	28OCT15	28OCT2015			03	Entered	41	Male	12JAN16	123	Placebo	>=250 mg/day	No	No	>=250 mg/day	No	Yes	Yes	Yes	Yes
Visit 1	3	insomnia	neurological	Yes	Yes	03_010	15JAN15	15JAN2015				No		Yes	Yes		Ultrasound	No	28OCT15	28OCT2015			03	Entered	41	Male	12JAN16	123	Placebo	>=250 mg/day	No	No	>=250 mg/day	No	Yes	Yes	Yes	Yes
Visit 1	4	sleep Apnea	neurological	Yes	Yes	03_010		SEP2010				No		Yes	Yes		Ultrasound	No	28OCT15	28OCT2015			03	Entered	41	Male	12JAN16	123	Placebo	>=250 mg/day	No	No	>=250 mg/day	No	Yes	Yes	Yes	Yes
Visit 1	5	Erictile dysyfunction	genital/urinary	Yes	Yes	03_010	15JAN15	15JAN2015				No		Yes	Yes		Ultrasound	No	28OCT15	28OCT2015			03	Entered	41	Male	12JAN16	123	Placebo	>=250 mg/day	No	No	>=250 mg/day	No	Yes	Yes	Yes	Yes
Visit 1	6	Gastroesophageal Reflux Disease	gastrointestinal	No	Yes	03_010		2000				No		Yes	Yes		Ultrasound	No	28OCT15	28OCT2015			03	Entered	41	Male	12JAN16	123	Placebo	>=250 mg/day	No	No	>=250 mg/day	No	Yes	Yes	Yes	Yes
Visit 1	9	hypertension	cardiovascular	Yes	Yes	03_010		MAR2015				No		Yes	Yes		Ultrasound	No	28OCT15	28OCT2015			03	Entered	41	Male	12JAN16	123	Placebo	>=250 mg/day	No	No	>=250 mg/day	No	Yes	Yes	Yes	Yes
Visit 1	10	abmormal brain congential	neurological	Yes	Yes	03_010		SEP2010				No		Yes	Yes		Ultrasound	No	28OCT15	28OCT2015			03	Entered	41	Male	12JAN16	123	Placebo	>=250 mg/day	No	No	>=250 mg/day	No	Yes	Yes	Yes	Yes
Visit 1	11	hypogonadism	immunological	Yes	Yes	03_010	15NOV15	15NOV2015				No		Yes	Yes		Ultrasound	No	28OCT15	28OCT2015			03	Entered	41	Male	12JAN16	123	Placebo	>=250 mg/day	No	No	>=250 mg/day	No	Yes	Yes	Yes	Yes
Visit 1	12	hydrocele	genital/urinary	Yes	Yes	03_010		APR2014				No		Yes	Yes		Ultrasound	No	28OCT15	28OCT2015			03	Entered	41	Male	12JAN16	123	Placebo	>=250 mg/day	No	No	>=250 mg/day	No	Yes	Yes	Yes	Yes
Visit 2						03_010							No										03	Entered	41	Male	12JAN16	123	Placebo	>=250 mg/day	No	No	>=250 mg/day	No	Yes	Yes	Yes	Yes
Visit 1	1	lumbar pinched nerve	surgeries	Yes		03_011		06UNK2014		06UNK2014		No		Yes	Yes		Ultrasound	No	18JUN15	18JUN2015			03	Entered	55	Male	11FEB16	188	MF4637	<250 mg/day	No	Yes	<250 mg/day	No	Yes	Yes	Yes	Yes
Visit 1	2	lt knee acl scope	surgeries	Yes		03_011		03UNK2012		03UNK2012		No		Yes	Yes		Ultrasound	No	18JUN15	18JUN2015			03	Entered	55	Male	11FEB16	188	MF4637	<250 mg/day	No	Yes	<250 mg/day	No	Yes	Yes	Yes	Yes
Visit 1	3	umbilical hernia	surgeries	Yes		03_011	18JUN15	18JUN2015	18JUN15	18JUN2015		No		Yes	Yes		Ultrasound	No	18JUN15	18JUN2015			03	Entered	55	Male	11FEB16	188	MF4637	<250 mg/day	No	Yes	<250 mg/day	No	Yes	Yes	Yes	Yes
Visit 1	4	ESPHOGAL REFLUX	gastrointestinal	Yes	Yes	03_011		2010				No		Yes	Yes		Ultrasound	No	18JUN15	18JUN2015			03	Entered	55	Male	11FEB16	188	MF4637	<250 mg/day	No	Yes	<250 mg/day	No	Yes	Yes	Yes	Yes
Visit 1	7	High blood presure	cardiovascular	Yes	Yes	03_011		JUN2015				No		Yes	Yes		Ultrasound	No	18JUN15	18JUN2015			03	Entered	55	Male	11FEB16	188	MF4637	<250 mg/day	No	Yes	<250 mg/day	No	Yes	Yes	Yes	Yes
Visit 1	8	pre-diabetic	endocrine	Yes	Yes	03_011		APR2015				No		Yes	Yes		Ultrasound	No	18JUN15	18JUN2015			03	Entered	55	Male	11FEB16	188	MF4637	<250 mg/day	No	Yes	<250 mg/day	No	Yes	Yes	Yes	Yes
Visit 1	9	COLON POLYP	gastrointestinal	Yes		03_011		2010		2010		No		Yes	Yes		Ultrasound	No	18JUN15	18JUN2015			03	Entered	55	Male	11FEB16	188	MF4637	<250 mg/day	No	Yes	<250 mg/day	No	Yes	Yes	Yes	Yes
Visit 1	10	HEPATIC STENTOSIS	liver	Yes	Yes	03_011		JUN2015				No		Yes	Yes		Ultrasound	No	18JUN15	18JUN2015			03	Entered	55	Male	11FEB16	188	MF4637	<250 mg/day	No	Yes	<250 mg/day	No	Yes	Yes	Yes	Yes
Visit 1	12	hydrocele	genital/urinary	Yes		03_011		DEC2012		DEC2012		No		Yes	Yes		Ultrasound	No	18JUN15	18JUN2015			03	Entered	55	Male	11FEB16	188	MF4637	<250 mg/day	No	Yes	<250 mg/day	No	Yes	Yes	Yes	Yes
Visit 1	13	erectile dysfunction	genital/urinary	Yes	Yes	03_011	14JUN16	14JUN2016				No		Yes	Yes		Ultrasound	No	18JUN15	18JUN2015			03	Entered	55	Male	11FEB16	188	MF4637	<250 mg/day	No	Yes	<250 mg/day	No	Yes	Yes	Yes	Yes
Visit 1	14	degenative disc disease	musculoskeletal	Yes	Yes	03_011		MAY2014				No		Yes	Yes		Ultrasound	No	18JUN15	18JUN2015			03	Entered	55	Male	11FEB16	188	MF4637	<250 mg/day	No	Yes	<250 mg/day	No	Yes	Yes	Yes	Yes
Visit 1	15	hepatic Hemangioma	liver	Yes	No	03_011		JUN2015				No		Yes	Yes		Ultrasound	No	18JUN15	18JUN2015			03	Entered	55	Male	11FEB16	188	MF4637	<250 mg/day	No	Yes	<250 mg/day	No	Yes	Yes	Yes	Yes
Visit 2						03_011							No										03	Entered	55	Male	11FEB16	188	MF4637	<250 mg/day	No	Yes	<250 mg/day	No	Yes	Yes	Yes	Yes
Visit 1	1	high blood pressure	cardiovascular	Yes	Yes	03_012	23AUG13	23AUG2013				No		Yes	Yes		Ultrasound	No	29OCT15	29OCT2015			03	Entered	63	Male	12FEB16	190	MF4637	<250 mg/day	No	Yes	<250 mg/day	No	Yes	Yes	Yes	Yes
Visit 1	3	high chol	cardiovascular	Yes	Yes	03_012	28AUG13	28AUG2013				No		Yes	Yes		Ultrasound	No	29OCT15	29OCT2015			03	Entered	63	Male	12FEB16	190	MF4637	<250 mg/day	No	Yes	<250 mg/day	No	Yes	Yes	Yes	Yes
Visit 1	4	Seasonal allergies	allergies	Yes	Yes	03_012	28AUG13	28AUG2013				No		Yes	Yes		Ultrasound	No	29OCT15	29OCT2015			03	Entered	63	Male	12FEB16	190	MF4637	<250 mg/day	No	Yes	<250 mg/day	No	Yes	Yes	Yes	Yes
Visit 1	6	sleep apnea	cardiovascular	Yes	Yes	03_012	28AUG13	28AUG2013				No		Yes	Yes		Ultrasound	No	29OCT15	29OCT2015			03	Entered	63	Male	12FEB16	190	MF4637	<250 mg/day	No	Yes	<250 mg/day	No	Yes	Yes	Yes	Yes
Visit 1	7	reflex	gastrointestinal	Yes	Yes	03_012	13JAN16	13JAN2016				No		Yes	Yes		Ultrasound	No	29OCT15	29OCT2015			03	Entered	63	Male	12FEB16	190	MF4637	<250 mg/day	No	Yes	<250 mg/day	No	Yes	Yes	Yes	Yes
Visit 1	8	insomia	neurological	Yes	Yes	03_012	28AUG13	28AUG2013				No		Yes	Yes		Ultrasound	No	29OCT15	29OCT2015			03	Entered	63	Male	12FEB16	190	MF4637	<250 mg/day	No	Yes	<250 mg/day	No	Yes	Yes	Yes	Yes
Visit 1	10	FEVER BLISTERS	oral	Yes	Yes	03_012		DEC2012				No		Yes	Yes		Ultrasound	No	29OCT15	29OCT2015			03	Entered	63	Male	12FEB16	190	MF4637	<250 mg/day	No	Yes	<250 mg/day	No	Yes	Yes	Yes	Yes
Visit 1	11	BELL`S PALSEY	neurological	Yes	No	03_012		JUN2005				No		Yes	Yes		Ultrasound	No	29OCT15	29OCT2015			03	Entered	63	Male	12FEB16	190	MF4637	<250 mg/day	No	Yes	<250 mg/day	No	Yes	Yes	Yes	Yes
Visit 1	12	Chronic kidney stage3	endocrine	Yes	Yes	03_012	13JAN16	13JAN2016				No		Yes	Yes		Ultrasound	No	29OCT15	29OCT2015			03	Entered	63	Male	12FEB16	190	MF4637	<250 mg/day	No	Yes	<250 mg/day	No	Yes	Yes	Yes	Yes
Visit 1	15	GANGLION CYST	musculoskeletal	Yes	Yes	03_012	11JAN15	11JAN2015				No		Yes	Yes		Ultrasound	No	29OCT15	29OCT2015			03	Entered	63	Male	12FEB16	190	MF4637	<250 mg/day	No	Yes	<250 mg/day	No	Yes	Yes	Yes	Yes
Visit 1	16	Chronic tendonitis	musculoskeletal	Yes	No	03_012	27NOV07	27NOV2007				No		Yes	Yes		Ultrasound	No	29OCT15	29OCT2015			03	Entered	63	Male	12FEB16	190	MF4637	<250 mg/day	No	Yes	<250 mg/day	No	Yes	Yes	Yes	Yes
Visit 1	17	TONSILLECTOMY	surgeries	N/A		03_012		1957		1957		No		Yes	Yes		Ultrasound	No	29OCT15	29OCT2015			03	Entered	63	Male	12FEB16	190	MF4637	<250 mg/day	No	Yes	<250 mg/day	No	Yes	Yes	Yes	Yes
Visit 1	18	IRRIABLE BOWEL SYNDROM	gastrointestinal	Yes	Yes	03_012	11FEB13	11FEB2013				No		Yes	Yes		Ultrasound	No	29OCT15	29OCT2015			03	Entered	63	Male	12FEB16	190	MF4637	<250 mg/day	No	Yes	<250 mg/day	No	Yes	Yes	Yes	Yes
Visit 1	19	VASECTOMY	surgeries	Yes		03_012		1986		1986		No		Yes	Yes		Ultrasound	No	29OCT15	29OCT2015			03	Entered	63	Male	12FEB16	190	MF4637	<250 mg/day	No	Yes	<250 mg/day	No	Yes	Yes	Yes	Yes
Visit 1	20	RHIOPLASTY	surgeries	Yes		03_012		1983		1983		No		Yes	Yes		Ultrasound	No	29OCT15	29OCT2015			03	Entered	63	Male	12FEB16	190	MF4637	<250 mg/day	No	Yes	<250 mg/day	No	Yes	Yes	Yes	Yes
Visit 1	21	APPENDECTOMY	surgeries	Yes		03_012		1957		1957		No		Yes	Yes		Ultrasound	No	29OCT15	29OCT2015			03	Entered	63	Male	12FEB16	190	MF4637	<250 mg/day	No	Yes	<250 mg/day	No	Yes	Yes	Yes	Yes
Visit 2						03_012							No										03	Entered	63	Male	12FEB16	190	MF4637	<250 mg/day	No	Yes	<250 mg/day	No	Yes	Yes	Yes	Yes
Visit 1	1	hypertension	cardiovascular	Yes	Yes	03_013	25NOV15	25NOV2015				No		Yes	Yes		Ultrasound	No	07DEC15	07DEC2015			03	Entered	61	Female	11FEB16	189	Placebo	<250 mg/day	No	Yes	<250 mg/day	No	Yes	Yes	Yes	Yes
Visit 1	2	Chronic kidney disease 3	endocrine	Yes	Yes	03_013	25NOV15	25NOV2015				No		Yes	Yes		Ultrasound	No	07DEC15	07DEC2015			03	Entered	61	Female	11FEB16	189	Placebo	<250 mg/day	No	Yes	<250 mg/day	No	Yes	Yes	Yes	Yes
Visit 1	3	HIGN CHOL	cardiovascular	Yes	Yes	03_013	25NOV15	25NOV2015				No		Yes	Yes		Ultrasound	No	07DEC15	07DEC2015			03	Entered	61	Female	11FEB16	189	Placebo	<250 mg/day	No	Yes	<250 mg/day	No	Yes	Yes	Yes	Yes
Visit 1	5	pre diabetic	endocrine	Yes	Yes	03_013	25NOV15	25NOV2015				No		Yes	Yes		Ultrasound	No	07DEC15	07DEC2015			03	Entered	61	Female	11FEB16	189	Placebo	<250 mg/day	No	Yes	<250 mg/day	No	Yes	Yes	Yes	Yes
Visit 1	6	seasonal allergies	eyes, ears, nose, throat	N/A	Yes	03_013		2004				No		Yes	Yes		Ultrasound	No	07DEC15	07DEC2015			03	Entered	61	Female	11FEB16	189	Placebo	<250 mg/day	No	Yes	<250 mg/day	No	Yes	Yes	Yes	Yes
Visit 1	7	rt wrist surgery	surgeries	N/A	No	03_013		2007				No		Yes	Yes		Ultrasound	No	07DEC15	07DEC2015			03	Entered	61	Female	11FEB16	189	Placebo	<250 mg/day	No	Yes	<250 mg/day	No	Yes	Yes	Yes	Yes
Visit 1	10	migraines	neurological	N/A	Yes	03_013		1956				No		Yes	Yes		Ultrasound	No	07DEC15	07DEC2015			03	Entered	61	Female	11FEB16	189	Placebo	<250 mg/day	No	Yes	<250 mg/day	No	Yes	Yes	Yes	Yes
Visit 1	11	bilateral heel spurs	musculoskeletal	N/A	No	03_013		2002				No		Yes	Yes		Ultrasound	No	07DEC15	07DEC2015			03	Entered	61	Female	11FEB16	189	Placebo	<250 mg/day	No	Yes	<250 mg/day	No	Yes	Yes	Yes	Yes
Visit 1	12	gastrophageal reflux	gastrointestinal	Yes	Yes	03_013		2002				No		Yes	Yes		Ultrasound	No	07DEC15	07DEC2015			03	Entered	61	Female	11FEB16	189	Placebo	<250 mg/day	No	Yes	<250 mg/day	No	Yes	Yes	Yes	Yes
Visit 1	13	rt hand contractures	musculoskeletal	N/A	No	03_013		2007				No		Yes	Yes		Ultrasound	No	07DEC15	07DEC2015			03	Entered	61	Female	11FEB16	189	Placebo	<250 mg/day	No	Yes	<250 mg/day	No	Yes	Yes	Yes	Yes
Visit 1	14	c-section	surgeries	Yes		03_013		1978		1978		No		Yes	Yes		Ultrasound	No	07DEC15	07DEC2015			03	Entered	61	Female	11FEB16	189	Placebo	<250 mg/day	No	Yes	<250 mg/day	No	Yes	Yes	Yes	Yes
Visit 1	15	c-section	surgeries	Yes		03_013		1981		1981		No		Yes	Yes		Ultrasound	No	07DEC15	07DEC2015			03	Entered	61	Female	11FEB16	189	Placebo	<250 mg/day	No	Yes	<250 mg/day	No	Yes	Yes	Yes	Yes
Visit 1	16	liver biospy	liver	Yes	No	03_013		2008				No		Yes	Yes		Ultrasound	No	07DEC15	07DEC2015			03	Entered	61	Female	11FEB16	189	Placebo	<250 mg/day	No	Yes	<250 mg/day	No	Yes	Yes	Yes	Yes
Visit 1	17	bilateral heel spurs	musculoskeletal	N/A	Yes	03_013		2002				No		Yes	Yes		Ultrasound	No	07DEC15	07DEC2015			03	Entered	61	Female	11FEB16	189	Placebo	<250 mg/day	No	Yes	<250 mg/day	No	Yes	Yes	Yes	Yes
Visit 2						03_013							No										03	Entered	61	Female	11FEB16	189	Placebo	<250 mg/day	No	Yes	<250 mg/day	No	Yes	Yes	Yes	Yes
Visit 1	1	Tubal Ligation bilateral	surgeries	N/A		04_001	21MAR07	21MAR2007	21MAR07	21MAR2007		Yes		Yes	Yes		Biopsy	No	24FEB15	24FEB2015			04	Entered	49	Female	13OCT15	124	Placebo	>=250 mg/day	Yes	No	>=250 mg/day	No	Yes	Yes	Yes	Yes
Visit 1	2	Breast Reduction	surgeries	N/A		04_001	01JAN06	01JAN2006	01JAN06	01JAN2006		Yes		Yes	Yes		Biopsy	No	24FEB15	24FEB2015			04	Entered	49	Female	13OCT15	124	Placebo	>=250 mg/day	Yes	No	>=250 mg/day	No	Yes	Yes	Yes	Yes
Visit 1	3	C-Section	surgeries	N/A		04_001	21MAR07	21MAR2007	21MAR07	21MAR2007		Yes		Yes	Yes		Biopsy	No	24FEB15	24FEB2015			04	Entered	49	Female	13OCT15	124	Placebo	>=250 mg/day	Yes	No	>=250 mg/day	No	Yes	Yes	Yes	Yes
Visit 1	4	Fatty Liver	gastrointestinal	N/A	Yes	04_001	03MAR14	03MAR2014				Yes		Yes	Yes		Biopsy	No	24FEB15	24FEB2015			04	Entered	49	Female	13OCT15	124	Placebo	>=250 mg/day	Yes	No	>=250 mg/day	No	Yes	Yes	Yes	Yes
Visit 1	5	Hypertension	endocrine	Yes	Yes	04_001	01JUN14	01JUN2014				Yes		Yes	Yes		Biopsy	No	24FEB15	24FEB2015			04	Entered	49	Female	13OCT15	124	Placebo	>=250 mg/day	Yes	No	>=250 mg/day	No	Yes	Yes	Yes	Yes
Visit 2	1	Tubal Ligation	surgeries	N/A		04_001	21MAR07	21MAR2007	21MAR07	21MAR2007			No										04	Entered	49	Female	13OCT15	124	Placebo	>=250 mg/day	Yes	No	>=250 mg/day	No	Yes	Yes	Yes	Yes
Visit 2	2	Breast Reduction	surgeries	N/A		04_001	01JAN06	01JAN2006	01JAN06	01JAN2006			No										04	Entered	49	Female	13OCT15	124	Placebo	>=250 mg/day	Yes	No	>=250 mg/day	No	Yes	Yes	Yes	Yes
Visit 2	3	C-Section	surgeries	N/A		04_001	21MAR07	21MAR2007	21MAR07	21MAR2007			No										04	Entered	49	Female	13OCT15	124	Placebo	>=250 mg/day	Yes	No	>=250 mg/day	No	Yes	Yes	Yes	Yes
Visit 2	4	Fatty Liver	gastrointestinal	N/A	Yes	04_001	03MAR14	03MAR2014					No										04	Entered	49	Female	13OCT15	124	Placebo	>=250 mg/day	Yes	No	>=250 mg/day	No	Yes	Yes	Yes	Yes
Visit 1						04_002						Yes		No	No	No		No					04	Screen Failure	56	Male							<250 mg/day	Yes	No	No	No	No
Visit 1	1	Appendectomy	surgeries	N/A		04_004	20OCT09	20OCT2009	20OCT09	20OCT2009		No		Yes	Yes		Biopsy	No	23OCT15	23OCT2015			04	Entered	34	Male	15OCT15	125	MF4637	<250 mg/day	No	No	<250 mg/day	No	Yes	Yes	Yes	No
Visit 1	2	liver biopsy	surgeries	N/A		04_004	19SEP14	19SEP2014	19SEP14	19SEP2014		No		Yes	Yes		Biopsy	No	23OCT15	23OCT2015			04	Entered	34	Male	15OCT15	125	MF4637	<250 mg/day	No	No	<250 mg/day	No	Yes	Yes	Yes	No
Visit 1	3	Fatty Liver	gastrointestinal	N/A	Yes	04_004	20JUN13	20JUN2013				No		Yes	Yes		Biopsy	No	23OCT15	23OCT2015			04	Entered	34	Male	15OCT15	125	MF4637	<250 mg/day	No	No	<250 mg/day	No	Yes	Yes	Yes	No
Visit 1	4	ankle cyst surgery	surgeries	N/A		04_004	03MAR14	03MAR2014	03MAR14	03MAR2014		No		Yes	Yes		Biopsy	No	23OCT15	23OCT2015			04	Entered	34	Male	15OCT15	125	MF4637	<250 mg/day	No	No	<250 mg/day	No	Yes	Yes	Yes	No
Visit 2	1	Appendectomy	surgeries	N/A		04_004	20OCT09	20OCT2009	20OCT09	20OCT2009			No										04	Entered	34	Male	15OCT15	125	MF4637	<250 mg/day	No	No	<250 mg/day	No	Yes	Yes	Yes	No
Visit 2	2	liver biopsy	surgeries	N/A		04_004	19SEP14	19SEP2014	19SEP14	19SEP2014			No										04	Entered	34	Male	15OCT15	125	MF4637	<250 mg/day	No	No	<250 mg/day	No	Yes	Yes	Yes	No
Visit 2	3	Fatty Liver	gastrointestinal	N/A	Yes	04_004	20JUN13	20JUN2013					No										04	Entered	34	Male	15OCT15	125	MF4637	<250 mg/day	No	No	<250 mg/day	No	Yes	Yes	Yes	No
Visit 2	4	ankle cyst surgery	surgeries	N/A		04_004	01JAN13	01JAN2013	02JAN13	02JAN2013			No										04	Entered	34	Male	15OCT15	125	MF4637	<250 mg/day	No	No	<250 mg/day	No	Yes	Yes	Yes	No
Visit 1	1	Lumbar spine surgery	surgeries	N/A		04_009	01JAN13	01JAN2013	01DEC13	01DEC2013		No		Yes	Yes		CT	No	21DEC15	21DEC2015			04	Entered	53	Female	04JAN16	127	Placebo	<250 mg/day	No	No	<250 mg/day	No	Yes	Yes	Yes	Yes
Visit 1	2	Asthma	allergies	Yes	Yes	04_009	01JAN63	01JAN1963				No		Yes	Yes		CT	No	21DEC15	21DEC2015			04	Entered	53	Female	04JAN16	127	Placebo	<250 mg/day	No	No	<250 mg/day	No	Yes	Yes	Yes	Yes
Visit 1	3	Hyperlipidimia	blood/bleeding disorders	Yes	Yes	04_009	01JAN14	01JAN2014				No		Yes	Yes		CT	No	21DEC15	21DEC2015			04	Entered	53	Female	04JAN16	127	Placebo	<250 mg/day	No	No	<250 mg/day	No	Yes	Yes	Yes	Yes
Visit 1	4	fatty liver	liver	No	Yes	04_009	01SEP15	01SEP2015				No		Yes	Yes		CT	No	21DEC15	21DEC2015			04	Entered	53	Female	04JAN16	127	Placebo	<250 mg/day	No	No	<250 mg/day	No	Yes	Yes	Yes	Yes
Visit 2	1	Fatty Liver	gastrointestinal	Yes	Yes	04_009	01SEP15	01SEP2015					No										04	Entered	53	Female	04JAN16	127	Placebo	<250 mg/day	No	No	<250 mg/day	No	Yes	Yes	Yes	Yes
Visit 2	2	Hyperlipidimia	blood/bleeding disorders	Yes	Yes	04_009	01JAN14	01JAN2014					No										04	Entered	53	Female	04JAN16	127	Placebo	<250 mg/day	No	No	<250 mg/day	No	Yes	Yes	Yes	Yes
Visit 2	3	Asthma	allergies	Yes	Yes	04_009	01JAN63	01JAN1963					No										04	Entered	53	Female	04JAN16	127	Placebo	<250 mg/day	No	No	<250 mg/day	No	Yes	Yes	Yes	Yes
Visit 2	4	Lumbar spine surgery	surgeries	N/A		04_009	01JAN13	01JAN2013	01JAN13	01JAN2013			No										04	Entered	53	Female	04JAN16	127	Placebo	<250 mg/day	No	No	<250 mg/day	No	Yes	Yes	Yes	Yes
Visit 1	1	Constipation	gastrointestinal	Yes	Yes	04_010	01JAN15	01JAN2015			medical records	No		Yes	Yes		Other, specify	No	14JAN15	14JAN2015			04	Entered	25	Female	05JAN16	126	MF4637	>=250 mg/day	No	No	>=250 mg/day	No	Yes	Yes	Yes	Yes
Visit 1	2	Biliary Dyskinesia	gastrointestinal	Yes	Yes	04_010	07JAN15	07JAN2015			medical records	No		Yes	Yes		Other, specify	No	14JAN15	14JAN2015			04	Entered	25	Female	05JAN16	126	MF4637	>=250 mg/day	No	No	>=250 mg/day	No	Yes	Yes	Yes	Yes
Visit 1	3	fatty liver	liver	Yes	Yes	04_010	01JAN14	01JAN2014			medical records	No		Yes	Yes		Other, specify	No	14JAN15	14JAN2015			04	Entered	25	Female	05JAN16	126	MF4637	>=250 mg/day	No	No	>=250 mg/day	No	Yes	Yes	Yes	Yes
Visit 1	4	Elevated LFT	liver	Yes	Yes	04_010	01JAN10	01JAN2010			medical records	No		Yes	Yes		Other, specify	No	14JAN15	14JAN2015			04	Entered	25	Female	05JAN16	126	MF4637	>=250 mg/day	No	No	>=250 mg/day	No	Yes	Yes	Yes	Yes
Visit 1	5	ADD	neurological	Yes	Yes	04_010	01JAN15	01JAN2015			medical records	No		Yes	Yes		Other, specify	No	14JAN15	14JAN2015			04	Entered	25	Female	05JAN16	126	MF4637	>=250 mg/day	No	No	>=250 mg/day	No	Yes	Yes	Yes	Yes
Visit 1	6	Helicobacter pylori	gastrointestinal	Yes	Yes	04_010	01JAN13	01JAN2013			medical records	No		Yes	Yes		Other, specify	No	14JAN15	14JAN2015			04	Entered	25	Female	05JAN16	126	MF4637	>=250 mg/day	No	No	>=250 mg/day	No	Yes	Yes	Yes	Yes
Visit 1	7	ADD	psychological	Yes	Yes	04_010	01JAN15	01JAN2015			medical records	No		Yes	Yes		Other, specify	No	14JAN15	14JAN2015			04	Entered	25	Female	05JAN16	126	MF4637	>=250 mg/day	No	No	>=250 mg/day	No	Yes	Yes	Yes	Yes
Visit 2	1	Constipation	gastrointestinal	Yes	Yes	04_010	01JAN15	01JAN2015					No										04	Entered	25	Female	05JAN16	126	MF4637	>=250 mg/day	No	No	>=250 mg/day	No	Yes	Yes	Yes	Yes
Visit 2	2	Biliary Dyskinesia	gastrointestinal	Yes	Yes	04_010	07JAN15	07JAN2015					No										04	Entered	25	Female	05JAN16	126	MF4637	>=250 mg/day	No	No	>=250 mg/day	No	Yes	Yes	Yes	Yes
Visit 2	3	fatty liver	liver	Yes	Yes	04_010	01JAN14	01JAN2014					No										04	Entered	25	Female	05JAN16	126	MF4637	>=250 mg/day	No	No	>=250 mg/day	No	Yes	Yes	Yes	Yes
Visit 2	4	Elevated LFT	liver	Yes	Yes	04_010	01JAN10	01JAN2010					No										04	Entered	25	Female	05JAN16	126	MF4637	>=250 mg/day	No	No	>=250 mg/day	No	Yes	Yes	Yes	Yes
Visit 2	5	ADD	neurological	Yes	Yes	04_010	01JAN15	01JAN2015					No										04	Entered	25	Female	05JAN16	126	MF4637	>=250 mg/day	No	No	>=250 mg/day	No	Yes	Yes	Yes	Yes
Visit 2	6	H.Pylori	gastrointestinal	Yes	Yes	04_010	01JAN13	01JAN2013					No										04	Entered	25	Female	05JAN16	126	MF4637	>=250 mg/day	No	No	>=250 mg/day	No	Yes	Yes	Yes	Yes
Visit 1	1	Diabetes	endocrine	Yes	Yes	04_011	01JAN10	01JAN2010				Yes		Yes	No	Yes		No			21DEC15	21DEC2015	04	Entered	41	Male	26JAN16	129	Placebo	>=250 mg/day	No	No	>=250 mg/day	No	Yes	Yes	Yes	Yes
Visit 1	2	Hypertension	endocrine	Yes	Yes	04_011	01JAN10	01JAN2010				Yes		Yes	No	Yes		No			21DEC15	21DEC2015	04	Entered	41	Male	26JAN16	129	Placebo	>=250 mg/day	No	No	>=250 mg/day	No	Yes	Yes	Yes	Yes
Visit 1	3	Asthma	allergies	Yes	Yes	04_011	01JAN14	01JAN2014				Yes		Yes	No	Yes		No			21DEC15	21DEC2015	04	Entered	41	Male	26JAN16	129	Placebo	>=250 mg/day	No	No	>=250 mg/day	No	Yes	Yes	Yes	Yes
Visit 2						04_011							No										04	Entered	41	Male	26JAN16	129	Placebo	>=250 mg/day	No	No	>=250 mg/day	No	Yes	Yes	Yes	Yes
Visit 1	1	Asthma	allergies	Yes	Yes	04_012	01JAN12	01JAN2012				No		Yes	Yes		CT	No	21DEC15	21DEC2015			04	Entered	19	Male	19JAN16	128	Placebo	<250 mg/day	No	No	<250 mg/day	No	Yes	Yes	Yes	Yes
Visit 1	2	Keratoconus	eyes, ears, nose, throat	No	Yes	04_012	01JAN12	01JAN2012				No		Yes	Yes		CT	No	21DEC15	21DEC2015			04	Entered	19	Male	19JAN16	128	Placebo	<250 mg/day	No	No	<250 mg/day	No	Yes	Yes	Yes	Yes
Visit 1	3	Attention Deficit Disorder	psychological	No	Yes	04_012	01JAN12	01JAN2012				No		Yes	Yes		CT	No	21DEC15	21DEC2015			04	Entered	19	Male	19JAN16	128	Placebo	<250 mg/day	No	No	<250 mg/day	No	Yes	Yes	Yes	Yes
Visit 1	4	morbid obesity	gastrointestinal	No	Yes	04_012	01JAN11	01JAN2011				No		Yes	Yes		CT	No	21DEC15	21DEC2015			04	Entered	19	Male	19JAN16	128	Placebo	<250 mg/day	No	No	<250 mg/day	No	Yes	Yes	Yes	Yes
Visit 2						04_012							No										04	Entered	19	Male	19JAN16	128	Placebo	<250 mg/day	No	No	<250 mg/day	No	Yes	Yes	Yes	Yes
Visit 1	1	hyperlipidemia	blood/bleeding disorders	Yes	Yes	04_013	01JAN12	01JAN2012			medical records	No		Yes	Yes		Other, specify	No	25SEP15	25SEP2015			04	Entered	64	Female	15FEB16	130	MF4637	<250 mg/day	No	Yes	<250 mg/day	No	Yes	Yes	Yes	Yes
Visit 1	2	Asthma	allergies	Yes	Yes	04_013	01JAN84	01JAN1984			medical records	No		Yes	Yes		Other, specify	No	25SEP15	25SEP2015			04	Entered	64	Female	15FEB16	130	MF4637	<250 mg/day	No	Yes	<250 mg/day	No	Yes	Yes	Yes	Yes
Visit 1	3	Hyperthyroidism	endocrine	Yes	Yes	04_013	01JAN12	01JAN2012			medical records	No		Yes	Yes		Other, specify	No	25SEP15	25SEP2015			04	Entered	64	Female	15FEB16	130	MF4637	<250 mg/day	No	Yes	<250 mg/day	No	Yes	Yes	Yes	Yes
Visit 1	4	Depression	psychological	No	Yes	04_013	01JAN10	01JAN2010			medical records	No		Yes	Yes		Other, specify	No	25SEP15	25SEP2015			04	Entered	64	Female	15FEB16	130	MF4637	<250 mg/day	No	Yes	<250 mg/day	No	Yes	Yes	Yes	Yes
Visit 1	5	Hysterectomy	surgeries	N/A	No	04_013	01JAN16	01JAN2016			medical records	No		Yes	Yes		Other, specify	No	25SEP15	25SEP2015			04	Entered	64	Female	15FEB16	130	MF4637	<250 mg/day	No	Yes	<250 mg/day	No	Yes	Yes	Yes	Yes
Visit 1	6	Cholecystectomy	surgeries	N/A	No	04_013	01JAN16	01JAN2016			medical records	No		Yes	Yes		Other, specify	No	25SEP15	25SEP2015			04	Entered	64	Female	15FEB16	130	MF4637	<250 mg/day	No	Yes	<250 mg/day	No	Yes	Yes	Yes	Yes
Visit 1	7	Appendectomy	surgeries	N/A	No	04_013	01JAN90	01JAN1990			medical records	No		Yes	Yes		Other, specify	No	25SEP15	25SEP2015			04	Entered	64	Female	15FEB16	130	MF4637	<250 mg/day	No	Yes	<250 mg/day	No	Yes	Yes	Yes	Yes
Visit 2						04_013							No										04	Entered	64	Female	15FEB16	130	MF4637	<250 mg/day	No	Yes	<250 mg/day	No	Yes	Yes	Yes	Yes
Visit 2						04_014							No										04	Entered	35	Female	25FEB16	131	MF4637	>=250 mg/day	No	No	>=250 mg/day	No	Yes	Yes	Yes	Yes
Visit 1	1	Asthma	allergies	Yes	Yes	04_015	01JAN14	01JAN2014				No		Yes	No	Yes		No			18JUN14	18JUN2014	04	Entered	50	Male	21MAR16	198	Placebo	<250 mg/day	No	Yes	<250 mg/day	No	Yes	Yes	Yes	No
Visit 1	2	Hypertension	endocrine	Yes	Yes	04_015	01JAN07	01JAN2007				No		Yes	No	Yes		No			18JUN14	18JUN2014	04	Entered	50	Male	21MAR16	198	Placebo	<250 mg/day	No	Yes	<250 mg/day	No	Yes	Yes	Yes	No
Visit 1	3	Dyslipidemia	endocrine	Yes	Yes	04_015	01JAN15	01JAN2015				No		Yes	No	Yes		No			18JUN14	18JUN2014	04	Entered	50	Male	21MAR16	198	Placebo	<250 mg/day	No	Yes	<250 mg/day	No	Yes	Yes	Yes	No
Visit 2						04_015							No										04	Entered	50	Male	21MAR16	198	Placebo	<250 mg/day	No	Yes	<250 mg/day	No	Yes	Yes	Yes	No
Visit 1						04_018						No		No	Yes		Ultrasound	No	12JUN16	12JUN2016			04	Early Termination	37	Male		197	MF4637	<250 mg/day	No	No	<250 mg/day	No	No	Yes	No	No
Visit 2						04_018							No										04	Early Termination	37	Male		197	MF4637	<250 mg/day	No	No	<250 mg/day	No	No	Yes	No	No
Visit 1	1	arrhythmia	cardiovascular	Yes	Yes	04_019	01JAN14	01JAN2014				No		Yes	Yes		Ultrasound	No	12JUN16	12JUN2016			04	Early Termination	50	Female		200	Placebo	<250 mg/day	No	No	<250 mg/day	No	No	Yes	No	No
Visit 1	2	hypothyroidism	endocrine	Yes	Yes	04_019	01JAN14	01JAN2014				No		Yes	Yes		Ultrasound	No	12JUN16	12JUN2016			04	Early Termination	50	Female		200	Placebo	<250 mg/day	No	No	<250 mg/day	No	No	Yes	No	No
Visit 1	3	fatty liver	liver	No	Yes	04_019	01JAN14	01JAN2014				No		Yes	Yes		Ultrasound	No	12JUN16	12JUN2016			04	Early Termination	50	Female		200	Placebo	<250 mg/day	No	No	<250 mg/day	No	No	Yes	No	No
Visit 1	4	Hypertension	cardiovascular	No	Yes	04_019	01JAN14	01JAN2014				No		Yes	Yes		Ultrasound	No	12JUN16	12JUN2016			04	Early Termination	50	Female		200	Placebo	<250 mg/day	No	No	<250 mg/day	No	No	Yes	No	No
Visit 1	5	cholecystectomy	surgeries	N/A	No	04_019	01JAN94	01JAN1994				No		Yes	Yes		Ultrasound	No	12JUN16	12JUN2016			04	Early Termination	50	Female		200	Placebo	<250 mg/day	No	No	<250 mg/day	No	No	Yes	No	No
Visit 1	6	appendectomy	surgeries	N/A	No	04_019	01JAN94	01JAN1994				No		Yes	Yes		Ultrasound	No	12JUN16	12JUN2016			04	Early Termination	50	Female		200	Placebo	<250 mg/day	No	No	<250 mg/day	No	No	Yes	No	No
Visit 1	7	myopic surgery	surgeries	N/A	No	04_019	01JAN14	01JAN2014				No		Yes	Yes		Ultrasound	No	12JUN16	12JUN2016			04	Early Termination	50	Female		200	Placebo	<250 mg/day	No	No	<250 mg/day	No	No	Yes	No	No
Visit 2						04_019							No										04	Early Termination	50	Female		200	Placebo	<250 mg/day	No	No	<250 mg/day	No	No	Yes	No	No
Visit 1	1	TYPE II DIABETES	blood/bleeding disorders	Yes	Yes	04_020	01JUL12	01JUL2012				Yes		Yes	No	Yes		No			19JUL16	19JUL2016	04	Entered	44	Male	28JUL16	196	MF4637	<250 mg/day	Yes	No	<250 mg/day	No	Yes	Yes	Yes	Yes
Visit 1	2	Legally blind from left eye	eyes, ears, nose, throat	Yes	Yes	04_020	26JUN95	26JUN1995				Yes		Yes	No	Yes		No			19JUL16	19JUL2016	04	Entered	44	Male	28JUL16	196	MF4637	<250 mg/day	Yes	No	<250 mg/day	No	Yes	Yes	Yes	Yes
Visit 1	3	obesity	psychological	Yes	Yes	04_020	01JUL14	01JUL2014				Yes		Yes	No	Yes		No			19JUL16	19JUL2016	04	Entered	44	Male	28JUL16	196	MF4637	<250 mg/day	Yes	No	<250 mg/day	No	Yes	Yes	Yes	Yes
Visit 2	1	TYPE II DIABETES	blood/bleeding disorders	Yes	Yes	04_020	01JUL12	01JUL2012					No										04	Entered	44	Male	28JUL16	196	MF4637	<250 mg/day	Yes	No	<250 mg/day	No	Yes	Yes	Yes	Yes
Visit 1						04_021						No		No	Yes		Ultrasound	No	15JUL16	15JUL2016			04	Screen Failure	50	Male							<250 mg/day	Yes	No	No	No	No
Visit 1	1	hypothyroidism	eyes, ears, nose, throat	Yes	Yes	04_022	31DEC14	31DEC2014				No		Yes	Yes		Ultrasound	No	22JUL16	22JUL2016			04	Entered	44	Female	28JUL16	199	Placebo	>=250 mg/day	No	No	>=250 mg/day	No	Yes	Yes	Yes	Yes
Visit 1	2	obesity	gastrointestinal	Yes	Yes	04_022	01JAN14	01JAN2014				No		Yes	Yes		Ultrasound	No	22JUL16	22JUL2016			04	Entered	44	Female	28JUL16	199	Placebo	>=250 mg/day	No	No	>=250 mg/day	No	Yes	Yes	Yes	Yes
Visit 1	3	Myopia	eyes, ears, nose, throat	No	Yes	04_022	01JAN16	01JAN2016				No		Yes	Yes		Ultrasound	No	22JUL16	22JUL2016			04	Entered	44	Female	28JUL16	199	Placebo	>=250 mg/day	No	No	>=250 mg/day	No	Yes	Yes	Yes	Yes
Visit 2	1	hypothyroidism	eyes, ears, nose, throat	Yes	Yes	04_022	31DEC14	31DEC2014					No										04	Entered	44	Female	28JUL16	199	Placebo	>=250 mg/day	No	No	>=250 mg/day	No	Yes	Yes	Yes	Yes
Visit 1	1	asthma	cardiovascular	Yes	Yes	04_023	01JAN60	01JAN1960				No		Yes	Yes		Ultrasound	No	16MAY16	16MAY2016			04	Entered	56	Male	17AUG16	202	MF4637	>=250 mg/day	No	No	>=250 mg/day	No	Yes	Yes	Yes	Yes
Visit 2						04_023							No										04	Entered	56	Male	17AUG16	202	MF4637	>=250 mg/day	No	No	>=250 mg/day	No	Yes	Yes	Yes	Yes
Visit 1	1	Pre. diabetes	endocrine	Yes	Yes	04_025	01JAN12	01JAN2012				No		Yes	Yes		Ultrasound	No	07AUG16	07AUG2016			04	Entered	49	Male	25AUG16	203	MF4637	<250 mg/day	No	No	<250 mg/day	No	Yes	Yes	Yes	Yes
Visit 1	2	Fatty liver	gastrointestinal	No	Yes	04_025	01JAN11	01JAN2011				No		Yes	Yes		Ultrasound	No	07AUG16	07AUG2016			04	Entered	49	Male	25AUG16	203	MF4637	<250 mg/day	No	No	<250 mg/day	No	Yes	Yes	Yes	Yes
Visit 2						04_025							No										04	Entered	49	Male	25AUG16	203	MF4637	<250 mg/day	No	No	<250 mg/day	No	Yes	Yes	Yes	Yes
Visit 1	1	fatty liver	gastrointestinal	No	Yes	04_027	01JAN08	01JAN2008				No		Yes	Yes		Ultrasound	No	07AUG16	07AUG2016			04	Early Termination	39	Female		201	Placebo	>=250 mg/day	No	No	>=250 mg/day	No	No	Yes	No	No
Visit 1	2	migraines	neurological	Yes	Yes	04_027	01JAN96	01JAN1996				No		Yes	Yes		Ultrasound	No	07AUG16	07AUG2016			04	Early Termination	39	Female		201	Placebo	>=250 mg/day	No	No	>=250 mg/day	No	No	Yes	No	No
Visit 2	1	fatty liver	gastrointestinal	No	Yes	04_027	01JAN08	01JAN2008					No										04	Early Termination	39	Female		201	Placebo	>=250 mg/day	No	No	>=250 mg/day	No	No	Yes	No	No
Visit 2	2	migraines	neurological	Yes	Yes	04_027	01JAN96	01JAN1996					No										04	Early Termination	39	Female		201	Placebo	>=250 mg/day	No	No	>=250 mg/day	No	No	Yes	No	No
Visit 1	1	postmenopausal	genital/urinary	N/A		04_030	01JAN85	01JAN1985	01JAN85	01JAN1985		Yes		Yes	Yes		Ultrasound	No	01SEP16	01SEP2016			04	Entered	67	Female	15SEP16	216	MF4637	>=250 mg/day	Yes	No	>=250 mg/day	No	Yes	Yes	Yes	Yes
Visit 1	2	Asthma	allergies	Yes	Yes	04_030	01JAN59	01JAN1959				Yes		Yes	Yes		Ultrasound	No	01SEP16	01SEP2016			04	Entered	67	Female	15SEP16	216	MF4637	>=250 mg/day	Yes	No	>=250 mg/day	No	Yes	Yes	Yes	Yes
Visit 1	3	Hypertension	cardiovascular	Yes	Yes	04_030	01JAN95	01JAN1995				Yes		Yes	Yes		Ultrasound	No	01SEP16	01SEP2016			04	Entered	67	Female	15SEP16	216	MF4637	>=250 mg/day	Yes	No	>=250 mg/day	No	Yes	Yes	Yes	Yes
Visit 1	4	gastroesophageal reflux disease	gastrointestinal	Yes	Yes	04_030	01JAN00	01JAN2000				Yes		Yes	Yes		Ultrasound	No	01SEP16	01SEP2016			04	Entered	67	Female	15SEP16	216	MF4637	>=250 mg/day	Yes	No	>=250 mg/day	No	Yes	Yes	Yes	Yes
Visit 1	5	diabetes mellitus,	endocrine	Yes	Yes	04_030	01JAN06	01JAN2006				Yes		Yes	Yes		Ultrasound	No	01SEP16	01SEP2016			04	Entered	67	Female	15SEP16	216	MF4637	>=250 mg/day	Yes	No	>=250 mg/day	No	Yes	Yes	Yes	Yes
Visit 1	6	Arthritis	musculoskeletal	Yes	Yes	04_030	01JAN85	01JAN1985				Yes		Yes	Yes		Ultrasound	No	01SEP16	01SEP2016			04	Entered	67	Female	15SEP16	216	MF4637	>=250 mg/day	Yes	No	>=250 mg/day	No	Yes	Yes	Yes	Yes
Visit 1	7	herniated disc	musculoskeletal	Yes	Yes	04_030	01JAN06	01JAN2006				Yes		Yes	Yes		Ultrasound	No	01SEP16	01SEP2016			04	Entered	67	Female	15SEP16	216	MF4637	>=250 mg/day	Yes	No	>=250 mg/day	No	Yes	Yes	Yes	Yes
Visit 1	8	Depression	psychological	Yes	Yes	04_030	01JAN15	01JAN2015				Yes		Yes	Yes		Ultrasound	No	01SEP16	01SEP2016			04	Entered	67	Female	15SEP16	216	MF4637	>=250 mg/day	Yes	No	>=250 mg/day	No	Yes	Yes	Yes	Yes
Visit 1	9	Mild cognitive impairment	neurological	Yes	Yes	04_030	01JAN13	01JAN2013				Yes		Yes	Yes		Ultrasound	No	01SEP16	01SEP2016			04	Entered	67	Female	15SEP16	216	MF4637	>=250 mg/day	Yes	No	>=250 mg/day	No	Yes	Yes	Yes	Yes
Visit 2						04_030							No										04	Entered	67	Female	15SEP16	216	MF4637	>=250 mg/day	Yes	No	>=250 mg/day	No	Yes	Yes	Yes	Yes
Visit 1	1	TYPE 2 DIABETES	endocrine	Yes	Yes	04_031	01JAN08	01JAN2008				Yes		Yes	Yes		Ultrasound	No	30AUG16	30AUG2016			04	Entered	56	Male	22SEP16	217	Placebo	<250 mg/day	Yes	No	<250 mg/day	No	Yes	Yes	Yes	Yes
Visit 1	2	ARTERIAL HYPERTENSION	endocrine	Yes	Yes	04_031	01JAN15	01JAN2015				Yes		Yes	Yes		Ultrasound	No	30AUG16	30AUG2016			04	Entered	56	Male	22SEP16	217	Placebo	<250 mg/day	Yes	No	<250 mg/day	No	Yes	Yes	Yes	Yes
Visit 1	3	MEMORY LOSS	neurological	Yes	Yes	04_031	01JAN15	01JAN2015				Yes		Yes	Yes		Ultrasound	No	30AUG16	30AUG2016			04	Entered	56	Male	22SEP16	217	Placebo	<250 mg/day	Yes	No	<250 mg/day	No	Yes	Yes	Yes	Yes
Visit 1	4	RIGHT EYE CATARACT	surgeries	N/A		04_031	01JAN08	01JAN2008	02JAN08	02JAN2008		Yes		Yes	Yes		Ultrasound	No	30AUG16	30AUG2016			04	Entered	56	Male	22SEP16	217	Placebo	<250 mg/day	Yes	No	<250 mg/day	No	Yes	Yes	Yes	Yes
Visit 2						04_031							No										04	Entered	56	Male	22SEP16	217	Placebo	<250 mg/day	Yes	No	<250 mg/day	No	Yes	Yes	Yes	Yes
Visit 1	1	fatty liver	gastrointestinal	No	Yes	04_032	01JAN15	01JAN2015				No		Yes	Yes		Ultrasound	No	07SEP16	07SEP2016			04	Early Termination	53	Female	22SEP16	218	MF4637	<250 mg/day	No	No	<250 mg/day	No	Yes	Yes	No	No
Visit 1	2	dyslipidemia	cardiovascular	No	Yes	04_032	01JAN14	01JAN2014				No		Yes	Yes		Ultrasound	No	07SEP16	07SEP2016			04	Early Termination	53	Female	22SEP16	218	MF4637	<250 mg/day	No	No	<250 mg/day	No	Yes	Yes	No	No
Visit 2	1	fatty liver	gastrointestinal	No	Yes	04_032	01JAN15	01JAN2015					No										04	Early Termination	53	Female	22SEP16	218	MF4637	<250 mg/day	No	No	<250 mg/day	No	Yes	Yes	No	No
Visit 2	2	dyslipidemia	cardiovascular	No	Yes	04_032	01JAN14	01JAN2014					No										04	Early Termination	53	Female	22SEP16	218	MF4637	<250 mg/day	No	No	<250 mg/day	No	Yes	Yes	No	No
Visit 1	1	Asthma	allergies	Yes	Yes	04_035	01JAN73	01JAN1973				No		Yes	Yes		Ultrasound	No	26SEP16	26SEP2016			04	Entered	59	Female	10OCT16	219	Placebo	>=250 mg/day	No	No	>=250 mg/day	No	Yes	Yes	Yes	Yes
Visit 1	2	Dyslipidemia	endocrine	Yes	Yes	04_035	01JAN05	01JAN2005				No		Yes	Yes		Ultrasound	No	26SEP16	26SEP2016			04	Entered	59	Female	10OCT16	219	Placebo	>=250 mg/day	No	No	>=250 mg/day	No	Yes	Yes	Yes	Yes
Visit 1	3	Fatty Liver	liver	Yes	Yes	04_035	01JUN16	01JUN2016				No		Yes	Yes		Ultrasound	No	26SEP16	26SEP2016			04	Entered	59	Female	10OCT16	219	Placebo	>=250 mg/day	No	No	>=250 mg/day	No	Yes	Yes	Yes	Yes
Visit 1	4	tummy tuck	surgeries	N/A		04_035	01JAN03	01JAN2003	01JAN03	01JAN2003		No		Yes	Yes		Ultrasound	No	26SEP16	26SEP2016			04	Entered	59	Female	10OCT16	219	Placebo	>=250 mg/day	No	No	>=250 mg/day	No	Yes	Yes	Yes	Yes
Visit 1	5	Appendectomy	surgeries	N/A		04_035	01JUN16	01JUN2016	01JUN16	01JUN2016		No		Yes	Yes		Ultrasound	No	26SEP16	26SEP2016			04	Entered	59	Female	10OCT16	219	Placebo	>=250 mg/day	No	No	>=250 mg/day	No	Yes	Yes	Yes	Yes
Visit 2						04_035							No										04	Entered	59	Female	10OCT16	219	Placebo	>=250 mg/day	No	No	>=250 mg/day	No	Yes	Yes	Yes	Yes
Visit 1	1	RENAL FAILURE	genital/urinary	Yes		09_001	10JUN13	10JUN2013	06AUG13	06AUG2013		Yes		Yes	Yes		Ultrasound	No	26OCT15	26OCT2015			09	Screen Failure	45	Male							>=250 mg/day	Yes	No	No	No	No
Visit 1	2	high blood sugar	endocrine	Yes	Yes	09_001		2012				Yes		Yes	Yes		Ultrasound	No	26OCT15	26OCT2015			09	Screen Failure	45	Male							>=250 mg/day	Yes	No	No	No	No
Visit 1	3	HIGH BLOOD PRESSURE	cardiovascular	Yes	Yes	09_001	17DEC10	17DEC2010				Yes		Yes	Yes		Ultrasound	No	26OCT15	26OCT2015			09	Screen Failure	45	Male							>=250 mg/day	Yes	No	No	No	No
Visit 1	1	IM	cardiovascular	Yes	Yes	09_002	13SEP13	13SEP2013				Yes		Yes	Yes		Ultrasound	No	18NOV15	18NOV2015			09	Screen Failure	48	Male							<250 mg/day	Yes	No	No	No	No
Visit 1	2	BYPASS	surgeries	Yes	Yes	09_002	16SEP13	16SEP2013				Yes		Yes	Yes		Ultrasound	No	18NOV15	18NOV2015			09	Screen Failure	48	Male							<250 mg/day	Yes	No	No	No	No
Visit 1	1	CAD	cardiovascular	Yes	Yes	09_003	24JAN14	24JAN2014				No		Yes	Yes		Ultrasound	No	30NOV15	30NOV2015			09	Screen Failure	53	Male							<250 mg/day	Yes	No	No	No	No
Visit 1	2	HTN	cardiovascular	Yes	Yes	09_003	24JAN14	24JAN2014				No		Yes	Yes		Ultrasound	No	30NOV15	30NOV2015			09	Screen Failure	53	Male							<250 mg/day	Yes	No	No	No	No
Visit 1	1	Myocardial infarction	cardiovascular	Yes		09_004	13SEP13	13SEP2013	20SEP16	20SEP2016		Yes		Yes	Yes		Ultrasound	No	18NOV15	18NOV2015			09	Entered	48	Male	05FEB16	164	Placebo	>=250 mg/day	Yes	Yes	<250 mg/day	No	Yes	Yes	Yes	Yes
Visit 1	2	BYPASS	surgeries	Yes	Yes	09_004	16SEP13	16SEP2013				Yes		Yes	Yes		Ultrasound	No	18NOV15	18NOV2015			09	Entered	48	Male	05FEB16	164	Placebo	>=250 mg/day	Yes	Yes	<250 mg/day	No	Yes	Yes	Yes	Yes
Visit 1	3	HTN	cardiovascular	Yes	Yes	09_004	01NOV15	01NOV2015				Yes		Yes	Yes		Ultrasound	No	18NOV15	18NOV2015			09	Entered	48	Male	05FEB16	164	Placebo	>=250 mg/day	Yes	Yes	<250 mg/day	No	Yes	Yes	Yes	Yes
Visit 1	4	CORONARY ARTERY DISEASE	cardiovascular	Yes	Yes	09_004	13SEP13	13SEP2013				Yes		Yes	Yes		Ultrasound	No	18NOV15	18NOV2015			09	Entered	48	Male	05FEB16	164	Placebo	>=250 mg/day	Yes	Yes	<250 mg/day	No	Yes	Yes	Yes	Yes
Visit 1	5	HYPERKALEMIA	cardiovascular	Yes		09_004	01NOV15	01NOV2015	08FEB16	08FEB2016		Yes		Yes	Yes		Ultrasound	No	18NOV15	18NOV2015			09	Entered	48	Male	05FEB16	164	Placebo	>=250 mg/day	Yes	Yes	<250 mg/day	No	Yes	Yes	Yes	Yes
Visit 1	6	HYPERLIPIDEMIA	cardiovascular	Yes	Yes	09_004	01NOV15	01NOV2015				Yes		Yes	Yes		Ultrasound	No	18NOV15	18NOV2015			09	Entered	48	Male	05FEB16	164	Placebo	>=250 mg/day	Yes	Yes	<250 mg/day	No	Yes	Yes	Yes	Yes
Visit 1	7	DIABETES MELLITUS TYPE 2	endocrine	Yes	Yes	09_004		2002				Yes		Yes	Yes		Ultrasound	No	18NOV15	18NOV2015			09	Entered	48	Male	05FEB16	164	Placebo	>=250 mg/day	Yes	Yes	<250 mg/day	No	Yes	Yes	Yes	Yes
Visit 2						09_004							No										09	Entered	48	Male	05FEB16	164	Placebo	>=250 mg/day	Yes	Yes	<250 mg/day	No	Yes	Yes	Yes	Yes
Visit 1	1	CAD	cardiovascular	Yes	Yes	09_005	24JAN14	24JAN2014				No		Yes	Yes		Ultrasound	No	30NOV15	30NOV2015			09	Entered	53	Male	05FEB16	166	MF4637	>=250 mg/day	Yes	Yes	<250 mg/day	No	Yes	Yes	Yes	Yes
Visit 1	2	HTN	cardiovascular	Yes	Yes	09_005	24JAN14	24JAN2014				No		Yes	Yes		Ultrasound	No	30NOV15	30NOV2015			09	Entered	53	Male	05FEB16	166	MF4637	>=250 mg/day	Yes	Yes	<250 mg/day	No	Yes	Yes	Yes	Yes
Visit 1	3	DYSLIPIDEMIA	cardiovascular	Yes	Yes	09_005	24JAN14	24JAN2014				No		Yes	Yes		Ultrasound	No	30NOV15	30NOV2015			09	Entered	53	Male	05FEB16	166	MF4637	>=250 mg/day	Yes	Yes	<250 mg/day	No	Yes	Yes	Yes	Yes
Visit 2						09_005							No										09	Entered	53	Male	05FEB16	166	MF4637	>=250 mg/day	Yes	Yes	<250 mg/day	No	Yes	Yes	Yes	Yes
Visit 1	1	high blood sugar	endocrine	Yes	Yes	09_006	09FEB10	09FEB2010				Yes		Yes	Yes		Ultrasound	No	22JAN16	22JAN2016			09	Screen Failure	72	Male							<250 mg/day	Yes	No	No	No	No
Visit 1	2	high blood pressure	cardiovascular	Yes	Yes	09_006	14SEP15	14SEP2015				Yes		Yes	Yes		Ultrasound	No	22JAN16	22JAN2016			09	Screen Failure	72	Male							<250 mg/day	Yes	No	No	No	No
Visit 1						09_007						No		No	Yes		Ultrasound	No	22JAN16	22JAN2016			09	Screen Failure	49	Female							>=250 mg/day	Yes	No	No	No	No
Visit 1						09_008						No		No	Yes		Ultrasound	No	22JAN16	22JAN2016			09	Entered	49	Male	04MAR16	165	Placebo	<250 mg/day	No	No	<250 mg/day	No	Yes	Yes	Yes	Yes
Visit 2						09_008							No										09	Entered	49	Male	04MAR16	165	Placebo	<250 mg/day	No	No	<250 mg/day	No	Yes	Yes	Yes	Yes
Visit 1	1	high blood pressure	cardiovascular	Yes	Yes	09_009	07JUL14	07JUL2014				Yes		Yes	Yes		Ultrasound	No	22JAN16	22JAN2016			09	Screen Failure	73	Female							>=250 mg/day	Yes	No	No	No	No
Visit 1	2	high blood sugar	endocrine	Yes	Yes	09_009	07MAY96	07MAY1996				Yes		Yes	Yes		Ultrasound	No	22JAN16	22JAN2016			09	Screen Failure	73	Female							>=250 mg/day	Yes	No	No	No	No
Visit 1	1	high blood pressure	cardiovascular	Yes	Yes	09_010		2000				No		Yes	Yes		Ultrasound	No	14MAY15	14MAY2015			09	Screen Failure	73	Female							>=250 mg/day	Yes	No	No	No	No
Visit 1	2	chest pain (CAD)	cardiovascular	Yes	Yes	09_010		2014				No		Yes	Yes		Ultrasound	No	14MAY15	14MAY2015			09	Screen Failure	73	Female							>=250 mg/day	Yes	No	No	No	No
Visit 1	3	stent (CAD)	surgeries	Yes	Yes	09_010		2014				No		Yes	Yes		Ultrasound	No	14MAY15	14MAY2015			09	Screen Failure	73	Female							>=250 mg/day	Yes	No	No	No	No
Visit 1	1	total hysterectomy	surgeries	N/A	Yes	09_011		1998				Yes		Yes	Yes		Ultrasound	No	22JAN16	22JAN2016			09	Screen Failure	68	Female							<250 mg/day	Yes	No	No	No	No
Visit 1	2	high blood pressure	cardiovascular	Yes	Yes	09_011		2000				Yes		Yes	Yes		Ultrasound	No	22JAN16	22JAN2016			09	Screen Failure	68	Female							<250 mg/day	Yes	No	No	No	No
Visit 1	3	high blood sugar	endocrine	Yes	Yes	09_011		2000				Yes		Yes	Yes		Ultrasound	No	22JAN16	22JAN2016			09	Screen Failure	68	Female							<250 mg/day	Yes	No	No	No	No
Visit 1	1	HIGH BLOOD PRESSURE	cardiovascular	Yes	Yes	09_012	10MAR10	10MAR2010				Yes		Yes	Yes		Ultrasound	No	29FEB16	29FEB2016			09	Screen Failure	73	Male							<250 mg/day	Yes	No	No	No	No
Visit 1	2	HIGH BLOOD SUGAR	endocrine	Yes	Yes	09_012	10MAR10	10MAR2010				Yes		Yes	Yes		Ultrasound	No	29FEB16	29FEB2016			09	Screen Failure	73	Male							<250 mg/day	Yes	No	No	No	No
Visit 1	3	CAD	cardiovascular	Yes	Yes	09_012	10MAR10	10MAR2010				Yes		Yes	Yes		Ultrasound	No	29FEB16	29FEB2016			09	Screen Failure	73	Male							<250 mg/day	Yes	No	No	No	No
Visit 1	4	HYPERTRIGLYCERIDEMIA	endocrine	Yes		09_012	29MAY15	29MAY2015	20SEP15	20SEP2015		Yes		Yes	Yes		Ultrasound	No	29FEB16	29FEB2016			09	Screen Failure	73	Male							<250 mg/day	Yes	No	No	No	No
Visit 1	1	HIGH BLODD PRESSURE	cardiovascular	Yes	Yes	09_013	24APR10	24APR2010				Yes		Yes	Yes		Ultrasound	No	14JAN16	14JAN2016			09	Screen Failure	57	Female							<250 mg/day	Yes	No	No	No	No
Visit 1	2	Myocardial infarction	cardiovascular	Yes		09_013	24APR10	24APR2010	24APR10	24APR2010		Yes		Yes	Yes		Ultrasound	No	14JAN16	14JAN2016			09	Screen Failure	57	Female							<250 mg/day	Yes	No	No	No	No
Visit 1	3	HIGH BLOOD SUGAR	endocrine	Yes	Yes	09_013	24APR10	24APR2010				Yes		Yes	Yes		Ultrasound	No	14JAN16	14JAN2016			09	Screen Failure	57	Female							<250 mg/day	Yes	No	No	No	No
Visit 1	4	MORBID OBESITY	endocrine	N/A	Yes	09_013	20JAN00	20JAN2000				Yes		Yes	Yes		Ultrasound	No	14JAN16	14JAN2016			09	Screen Failure	57	Female							<250 mg/day	Yes	No	No	No	No
Visit 1	1	HBP	cardiovascular	Yes	Yes	09_015	14SEP15	14SEP2015				Yes		Yes	Yes		Ultrasound	No	22JAN16	22JAN2016			09	Entered	72	Male	04OCT16	167	MF4637	>=250 mg/day	Yes	No	<250 mg/day	No	Yes	Yes	Yes	Yes
Visit 1	2	DM type 2	endocrine	Yes	Yes	09_015	09FEB10	09FEB2010				Yes		Yes	Yes		Ultrasound	No	22JAN16	22JAN2016			09	Entered	72	Male	04OCT16	167	MF4637	>=250 mg/day	Yes	No	<250 mg/day	No	Yes	Yes	Yes	Yes
Visit 2						09_015							No										09	Entered	72	Male	04OCT16	167	MF4637	>=250 mg/day	Yes	No	<250 mg/day	No	Yes	Yes	Yes	Yes
Visit 1	1	Diabetes type 2	endocrine	Yes	Yes	09_016	07MAY96	07MAY1996				Yes		Yes	Yes		Ultrasound	No	26JAN16	26JAN2016			09	Screen Failure	74	Female							<250 mg/day	Yes	No	No	No	No
Visit 1	2	HBP	cardiovascular	Yes	Yes	09_016	07JUL14	07JUL2014				Yes		Yes	Yes		Ultrasound	No	26JAN16	26JAN2016			09	Screen Failure	74	Female							<250 mg/day	Yes	No	No	No	No
Visit 1	3	Dyslipidemia	endocrine	Yes	Yes	09_016	20NOV15	20NOV2015				Yes		Yes	Yes		Ultrasound	No	26JAN16	26JAN2016			09	Screen Failure	74	Female							<250 mg/day	Yes	No	No	No	No
Visit 1	1	Diabetes mellitus type 2	endocrine	Yes	Yes	09_017		2000				Yes		Yes	Yes		Ultrasound	No	22JAN16	22JAN2016			09	Screen Failure	69	Female							<250 mg/day	Yes	No	No	No	No
Visit 1	2	HBP	cardiovascular	Yes	Yes	09_017		2000				Yes		Yes	Yes		Ultrasound	No	22JAN16	22JAN2016			09	Screen Failure	69	Female							<250 mg/day	Yes	No	No	No	No
Visit 1	1	HBP	cardiovascular	Yes	Yes	09_018		2010				Yes		Yes	Yes		Ultrasound	No	29FEB16	29FEB2016			09	Entered	73	Male	14NOV16	105	Placebo	>=250 mg/day	Yes	No	>=250 mg/day	No	Yes	Yes	Yes	Yes
Visit 1	2	Diabetes mellitus type 2	endocrine	Yes	Yes	09_018		2010				Yes		Yes	Yes		Ultrasound	No	29FEB16	29FEB2016			09	Entered	73	Male	14NOV16	105	Placebo	>=250 mg/day	Yes	No	>=250 mg/day	No	Yes	Yes	Yes	Yes
Visit 1	3	CAD	cardiovascular	Yes	Yes	09_018		2010				Yes		Yes	Yes		Ultrasound	No	29FEB16	29FEB2016			09	Entered	73	Male	14NOV16	105	Placebo	>=250 mg/day	Yes	No	>=250 mg/day	No	Yes	Yes	Yes	Yes
Visit 1	4	Hypertriglycidemia	cardiovascular	Yes	Yes	09_018		2007				Yes		Yes	Yes		Ultrasound	No	29FEB16	29FEB2016			09	Entered	73	Male	14NOV16	105	Placebo	>=250 mg/day	Yes	No	>=250 mg/day	No	Yes	Yes	Yes	Yes
Visit 1	5	Congestive Heart Failure	cardiovascular	Yes	Yes	09_018		2010				Yes		Yes	Yes		Ultrasound	No	29FEB16	29FEB2016			09	Entered	73	Male	14NOV16	105	Placebo	>=250 mg/day	Yes	No	>=250 mg/day	No	Yes	Yes	Yes	Yes
Visit 2						09_018							No										09	Entered	73	Male	14NOV16	105	Placebo	>=250 mg/day	Yes	No	>=250 mg/day	No	Yes	Yes	Yes	Yes
Visit 1	1	CAD	cardiovascular	Yes	Yes	09_019		2014				Yes		Yes	No	No		No			08SEP16	08SEP2016	09	Screen Failure	74	Female							<250 mg/day	Yes	No	No	No	No
Visit 1	2	HIGHT BLOOD PRESION	cardiovascular	Yes	Yes	09_019		2000				Yes		Yes	No	No		No			08SEP16	08SEP2016	09	Screen Failure	74	Female							<250 mg/day	Yes	No	No	No	No
Visit 1	3	Catheterization	cardiovascular	Yes		09_019	04FEB14	04FEB2014	04FEB14	04FEB2014		Yes		Yes	No	No		No			08SEP16	08SEP2016	09	Screen Failure	74	Female							<250 mg/day	Yes	No	No	No	No
Visit 1	4	Hiatus hernia	gastrointestinal	Yes	Yes	09_019	31JAN07	31JAN2007				Yes		Yes	No	No		No			08SEP16	08SEP2016	09	Screen Failure	74	Female							<250 mg/day	Yes	No	No	No	No
Visit 1	1	DM type 2	endocrine	Yes	Yes	09_020	20MAY04	20MAY2004				Yes		Yes	Yes		Ultrasound	No	10AUG16	10AUG2016			09	Entered	53	Female	14OCT16	169	MF4637	>=250 mg/day	Yes	No	<250 mg/day	No	Yes	Yes	Yes	Yes
Visit 2						09_020							No										09	Entered	53	Female	14OCT16	169	MF4637	>=250 mg/day	Yes	No	<250 mg/day	No	Yes	Yes	Yes	Yes
Visit 1	1	HTN	cardiovascular	Yes	Yes	09_021	25SEP00	25SEP2000				No		Yes	Yes		Ultrasound	No	10AUG16	10AUG2016			09	Entered	54	Male	27OCT16	104	MF4637	>=250 mg/day	No	No	<250 mg/day	No	Yes	Yes	Yes	Yes
Visit 2	1	HTN	cardiovascular	Yes	Yes	09_021	25SEP00	25SEP2000					No										09	Entered	54	Male	27OCT16	104	MF4637	>=250 mg/day	No	No	<250 mg/day	No	Yes	Yes	Yes	Yes
Visit 1	1	DM type 2	endocrine	Yes	Yes	09_022	15JUN01	15JUN2001				Yes		Yes	Yes		Ultrasound	No	10AUG16	10AUG2016			09	Screen Failure	55	Male							<250 mg/day	Yes	No	No	No	No
Visit 1	1	DM type 2	endocrine	Yes	Yes	09_023	15JUN96	15JUN1996				Yes		Yes	Yes		Ultrasound	No	10AUG16	10AUG2016			09	Screen Failure	68	Female							<250 mg/day	Yes	No	No	No	No
Visit 1	1	DM type 2	endocrine	Yes	Yes	09_024	15JUN06	15JUN2006				Yes		Yes	Yes		Ultrasound	No	26AUG16	26AUG2016			09	Entered	47	Male	04OCT16	168	Placebo	>=250 mg/day	Yes	No	<250 mg/day	No	Yes	Yes	Yes	No
Visit 1	2	HTN	cardiovascular	Yes	Yes	09_024	04JAN01	04JAN2001				Yes		Yes	Yes		Ultrasound	No	26AUG16	26AUG2016			09	Entered	47	Male	04OCT16	168	Placebo	>=250 mg/day	Yes	No	<250 mg/day	No	Yes	Yes	Yes	No
Visit 2						09_024							No										09	Entered	47	Male	04OCT16	168	Placebo	>=250 mg/day	Yes	No	<250 mg/day	No	Yes	Yes	Yes	No
Visit 1	1	HTN	cardiovascular	Yes	Yes	09_025	01MAR00	01MAR2000				No		Yes	Yes		Ultrasound	No	10AUG16	10AUG2016			09	Screen Failure	70	Female							<250 mg/day	Yes	No	No	No	No
Visit 1						09_026						No		No	Yes		Ultrasound	No	01NOV16	01NOV2016			09	Entered	55	Female	12DEC16	171	Placebo	>=250 mg/day	No	No	<250 mg/day	No	Yes	Yes	Yes	Yes
Visit 2						09_026							No										09	Entered	55	Female	12DEC16	171	Placebo	>=250 mg/day	No	No	<250 mg/day	No	Yes	Yes	Yes	Yes
Visit 1	1	Diabetes type 2	endocrine	Yes	Yes	09_027	11MAY04	11MAY2004				Yes		Yes	Yes		Ultrasound	No	01NOV16	01NOV2016			09	Early Termination	60	Female	12DEC16	107	Placebo	>=250 mg/day	Yes	No	<250 mg/day	No	Yes	Yes	No	No
Visit 1	2	HTN	cardiovascular	Yes	Yes	09_027	12JUL16	12JUL2016				Yes		Yes	Yes		Ultrasound	No	01NOV16	01NOV2016			09	Early Termination	60	Female	12DEC16	107	Placebo	>=250 mg/day	Yes	No	<250 mg/day	No	Yes	Yes	No	No
Visit 2						09_027							No										09	Early Termination	60	Female	12DEC16	107	Placebo	>=250 mg/day	Yes	No	<250 mg/day	No	Yes	Yes	No	No
Visit 1						09_028						No		No	Yes		Ultrasound	No	01NOV16	01NOV2016			09	Screen Failure	44	Female							<250 mg/day	Yes	No	No	No	No
Visit 1	1	Diabetes type 2	endocrine	Yes	Yes	09_029	14DEC05	14DEC2005				No		Yes	Yes		Ultrasound	No	01NOV16	01NOV2016			09	Early Termination	63	Female	12DEC16	106	MF4637	>=250 mg/day	Yes	No	<250 mg/day	No	Yes	Yes	No	No
Visit 1	2	HTN	cardiovascular	Yes	Yes	09_029	05FEB08	05FEB2008				No		Yes	Yes		Ultrasound	No	01NOV16	01NOV2016			09	Early Termination	63	Female	12DEC16	106	MF4637	>=250 mg/day	Yes	No	<250 mg/day	No	Yes	Yes	No	No
Visit 2						09_029							No										09	Early Termination	63	Female	12DEC16	106	MF4637	>=250 mg/day	Yes	No	<250 mg/day	No	Yes	Yes	No	No
Visit 1	1	Hyperthyroidism	endocrine	Yes	Yes	09_030	01NOV10	01NOV2010				No		Yes	Yes		Ultrasound	No	01NOV16	01NOV2016			09	Entered	59	Female	12DEC16	170	MF4637	>=250 mg/day	No	No	<250 mg/day	No	Yes	Yes	Yes	Yes
Visit 2						09_030							No										09	Entered	59	Female	12DEC16	170	MF4637	>=250 mg/day	No	No	<250 mg/day	No	Yes	Yes	Yes	Yes
Visit 1	1	migraine headaches	neurological	Yes	Yes	10_001		2001				No		Yes	No								10	Screen Failure	31	Male							>=250 mg/day	Yes	No	No	No	No
Visit 1	2	recurrent bronchitis	eyes, ears, nose, throat	Yes	Yes	10_001		2012				No		Yes	No								10	Screen Failure	31	Male							>=250 mg/day	Yes	No	No	No	No
Visit 1	3	hyperglycemia	endocrine	No	No	10_001		2012				No		Yes	No								10	Screen Failure	31	Male							>=250 mg/day	Yes	No	No	No	No
Visit 1	4	Temporomandibular joint disorer	musculoskeletal	Yes	Yes	10_001		2012				No		Yes	No								10	Screen Failure	31	Male							>=250 mg/day	Yes	No	No	No	No
Visit 1	5	Adjustment reaction	psychological	Yes	Yes	10_001		2013				No		Yes	No								10	Screen Failure	31	Male							>=250 mg/day	Yes	No	No	No	No
Visit 1	6	depressive symptoms	psychological	Yes	Yes	10_001		2013				No		Yes	No								10	Screen Failure	31	Male							>=250 mg/day	Yes	No	No	No	No
Visit 1	7	appendectomy	surgeries	N/A	No	10_001		2005				No		Yes	No								10	Screen Failure	31	Male							>=250 mg/day	Yes	No	No	No	No
Visit 1	8	laparoscopic cholecystectomy	surgeries	N/A	No	10_001		2012				No		Yes	No								10	Screen Failure	31	Male							>=250 mg/day	Yes	No	No	No	No
Visit 1	9	Gallstones	gastrointestinal	No	No	10_001		2012				No		Yes	No								10	Screen Failure	31	Male							>=250 mg/day	Yes	No	No	No	No
Visit 1	10	Blurred Vision	eyes, ears, nose, throat	N/A	No	10_001	26DEC13	26DEC2013				No		Yes	No								10	Screen Failure	31	Male							>=250 mg/day	Yes	No	No	No	No
Visit 1	11	Cough	eyes, ears, nose, throat	N/A	No	10_001	26DEC13	26DEC2013				No		Yes	No								10	Screen Failure	31	Male							>=250 mg/day	Yes	No	No	No	No
Visit 1	12	Fatigue	endocrine	N/A	No	10_001	20AUG13	20AUG2013				No		Yes	No								10	Screen Failure	31	Male							>=250 mg/day	Yes	No	No	No	No
Visit 1	13	Malaise	endocrine	N/A	No	10_001	20AUG13	20AUG2013				No		Yes	No								10	Screen Failure	31	Male							>=250 mg/day	Yes	No	No	No	No
Visit 1	14	Left Hip Pain	musculoskeletal	N/A	No	10_001	29JUL13	29JUL2013				No		Yes	No								10	Screen Failure	31	Male							>=250 mg/day	Yes	No	No	No	No
Visit 1	15	Left ankle sprain	musculoskeletal	N/A	No	10_001		MAY2013				No		Yes	No								10	Screen Failure	31	Male							>=250 mg/day	Yes	No	No	No	No
Visit 1	16	Gastroesophageal reflux disease	gastrointestinal	Yes	Yes	10_001		2014				No		Yes	No								10	Screen Failure	31	Male							>=250 mg/day	Yes	No	No	No	No
Visit 1	17	Stool changes	gastrointestinal	N/A	No	10_001	25SEP14	25SEP2014				No		Yes	No								10	Screen Failure	31	Male							>=250 mg/day	Yes	No	No	No	No
Visit 1	18	dysuria	genital/urinary	N/A	No	10_001	24SEP14	24SEP2014				No		Yes	No								10	Screen Failure	31	Male							>=250 mg/day	Yes	No	No	No	No
Visit 1	19	appendicitis	gastrointestinal	N/A	No	10_001		2005				No		Yes	No								10	Screen Failure	31	Male							>=250 mg/day	Yes	No	No	No	No
Visit 1	20	Bee stings	allergies	Yes	Yes	10_001		1993				No		Yes	No								10	Screen Failure	31	Male							>=250 mg/day	Yes	No	No	No	No
Visit 1	1	Intermittent headaches	eyes, ears, nose, throat	Yes	Yes	10_002		DEC2013				Yes		Yes	No								10	Screen Failure	33	Male							<250 mg/day	Yes	No	No	No	No
Visit 1	2	childhood asthma	eyes, ears, nose, throat	N/A		10_002		1990		2000		Yes		Yes	No								10	Screen Failure	33	Male							<250 mg/day	Yes	No	No	No	No
Visit 1	3	acute bronchitis	eyes, ears, nose, throat	N/A		10_002		JAN2015		MAR2015		Yes		Yes	No								10	Screen Failure	33	Male							<250 mg/day	Yes	No	No	No	No
Visit 1	4	Pneumonia	eyes, ears, nose, throat	N/A		10_002		FEB2015		MAR2015		Yes		Yes	No								10	Screen Failure	33	Male							<250 mg/day	Yes	No	No	No	No
Visit 1	5	hypertension	cardiovascular	Yes	Yes	10_002		DEC2013				Yes		Yes	No								10	Screen Failure	33	Male							<250 mg/day	Yes	No	No	No	No
Visit 1	6	Dyslipidemia	cardiovascular	Yes	Yes	10_002		DEC2013				Yes		Yes	No								10	Screen Failure	33	Male							<250 mg/day	Yes	No	No	No	No
Visit 1	7	Vitamin D Deficiency	endocrine	Yes	Yes	10_002		JUL2013				Yes		Yes	No								10	Screen Failure	33	Male							<250 mg/day	Yes	No	No	No	No
Visit 1	8	Vitamin B12 deficiency	endocrine	Yes	Yes	10_002		JUL2013				Yes		Yes	No								10	Screen Failure	33	Male							<250 mg/day	Yes	No	No	No	No
Visit 1	9	fatigue	endocrine	N/A		10_002		JUN2013		MAR2014		Yes		Yes	No								10	Screen Failure	33	Male							<250 mg/day	Yes	No	No	No	No
Visit 1	10	Malaise	endocrine	N/A		10_002		JUN2013		MAR2014		Yes		Yes	No								10	Screen Failure	33	Male							<250 mg/day	Yes	No	No	No	No
Visit 1	11	Type 2 diabetes	endocrine	Yes	Yes	10_002	04DEC13	04DEC2013				Yes		Yes	No								10	Screen Failure	33	Male							<250 mg/day	Yes	No	No	No	No
Visit 1	12	Left knee pain	musculoskeletal	N/A		10_002		JUL2013		SEP2013		Yes		Yes	No								10	Screen Failure	33	Male							<250 mg/day	Yes	No	No	No	No
Visit 1	13	Left meniscal tear	musculoskeletal	N/A		10_002		JUL2013		AUG2013		Yes		Yes	No								10	Screen Failure	33	Male							<250 mg/day	Yes	No	No	No	No
Visit 1	14	Left meniscal tear repair	surgeries	N/A		10_002		AUG2013		AUG2013		Yes		Yes	No								10	Screen Failure	33	Male							<250 mg/day	Yes	No	No	No	No
Visit 1	15	Left shoulder pain	musculoskeletal	N/A		10_002		FEB2014		APR2014		Yes		Yes	No								10	Screen Failure	33	Male							<250 mg/day	Yes	No	No	No	No
Visit 1	16	hypogonadism	genital/urinary	Yes	Yes	10_002	20JUN13	20JUN2013				Yes		Yes	No								10	Screen Failure	33	Male							<250 mg/day	Yes	No	No	No	No
Visit 1	1	Allergic Rhinitis	eyes, ears, nose, throat	Yes	Yes	10_003		2010				No		Yes	No								10	Screen Failure	54	Female							<250 mg/day	Yes	No	No	No	No
Visit 1	2	Conjunctivitis left eye	eyes, ears, nose, throat	N/A		10_003	29MAR13	29MAR2013		APR2013		No		Yes	No								10	Screen Failure	54	Female							<250 mg/day	Yes	No	No	No	No
Visit 1	3	Tinea under left breast	dermatological	N/A		10_003	08JUN13	08JUN2013		JUN2013		No		Yes	No								10	Screen Failure	54	Female							<250 mg/day	Yes	No	No	No	No
Visit 1	4	Poison ivy left forearm	dermatological	N/A		10_003	11JUL13	11JUL2013		JUL2013		No		Yes	No								10	Screen Failure	54	Female							<250 mg/day	Yes	No	No	No	No
Visit 1	5	Rash on abdomen	dermatological	N/A		10_003		NOV2013		DEC2013		No		Yes	No								10	Screen Failure	54	Female							<250 mg/day	Yes	No	No	No	No
Visit 1	6	skin tags right breast	dermatological	N/A		10_003		2014	04APR14	04APR2014		No		Yes	No								10	Screen Failure	54	Female							<250 mg/day	Yes	No	No	No	No
Visit 1	7	Diabetic neuropathy	neurological	Yes	Yes	10_003		2014				No		Yes	No								10	Screen Failure	54	Female							<250 mg/day	Yes	No	No	No	No
Visit 1	8	Restless leg syndrome	neurological	Yes	Yes	10_003		JAN2015				No		Yes	No								10	Screen Failure	54	Female							<250 mg/day	Yes	No	No	No	No
Visit 1	9	insomnia	neurological	Yes	Yes	10_003		2014				No		Yes	No								10	Screen Failure	54	Female							<250 mg/day	Yes	No	No	No	No
Visit 1	10	hypertension	cardiovascular	Yes	Yes	10_003		2003				No		Yes	No								10	Screen Failure	54	Female							<250 mg/day	Yes	No	No	No	No
Visit 1	11	dyslipidemia	cardiovascular	Yes	Yes	10_003		2003				No		Yes	No								10	Screen Failure	54	Female							<250 mg/day	Yes	No	No	No	No
Visit 1	12	elevated liver enzymes	liver	Yes	Yes	10_003		APR2012				No		Yes	No								10	Screen Failure	54	Female							<250 mg/day	Yes	No	No	No	No
Visit 1	13	hypothyroidism	endocrine	Yes	Yes	10_003	19JUL12	19JUL2012				No		Yes	No								10	Screen Failure	54	Female							<250 mg/day	Yes	No	No	No	No
Visit 1	14	Calcaneal spur left foot	musculoskeletal	N/A		10_003		1995		1995		No		Yes	No								10	Screen Failure	54	Female							<250 mg/day	Yes	No	No	No	No
Visit 1	15	hiatal hernia	musculoskeletal	N/A		10_003		2005		2005		No		Yes	No								10	Screen Failure	54	Female							<250 mg/day	Yes	No	No	No	No
Visit 1	16	Left foot pain	musculoskeletal	Yes	Yes	10_003		OCT2013				No		Yes	No								10	Screen Failure	54	Female							<250 mg/day	Yes	No	No	No	No
Visit 1	17	Osteoarthritis	musculoskeletal	Yes	Yes	10_003		2000				No		Yes	No								10	Screen Failure	54	Female							<250 mg/day	Yes	No	No	No	No
Visit 1	18	ventral hernia	musculoskeletal	N/A		10_003		2005		2005		No		Yes	No								10	Screen Failure	54	Female							<250 mg/day	Yes	No	No	No	No
Visit 1	19	Low back pain	musculoskeletal	Yes	Yes	10_003		DEC2012				No		Yes	No								10	Screen Failure	54	Female							<250 mg/day	Yes	No	No	No	No
Visit 1	20	depression	psychological	Yes	Yes	10_003		1995				No		Yes	No								10	Screen Failure	54	Female							<250 mg/day	Yes	No	No	No	No
Visit 1	21	gastroesophageal reflux disease	gastrointestinal	Yes	Yes	10_003		2013				No		Yes	No								10	Screen Failure	54	Female							<250 mg/day	Yes	No	No	No	No
Visit 1	22	abnormal uterine bleeding	genital/urinary	N/A	No	10_003		1999				No		Yes	No								10	Screen Failure	54	Female							<250 mg/day	Yes	No	No	No	No
Visit 1	23	postmenopausal	genital/urinary	Yes	Yes	10_003		2000				No		Yes	No								10	Screen Failure	54	Female							<250 mg/day	Yes	No	No	No	No
Visit 1	24	Total abdominal hysterectomy	surgeries	N/A		10_003		1999		1999		No		Yes	No								10	Screen Failure	54	Female							<250 mg/day	Yes	No	No	No	No
Visit 1	25	Unilateral salpingoophorectomy	surgeries	N/A		10_003		1999		1999		No		Yes	No								10	Screen Failure	54	Female							<250 mg/day	Yes	No	No	No	No
Visit 1	26	Ventral hernia repair	surgeries	N/A		10_003		2005		2005		No		Yes	No								10	Screen Failure	54	Female							<250 mg/day	Yes	No	No	No	No
Visit 1	27	Hiatal hernia repair	surgeries	N/A		10_003		2005		2005		No		Yes	No								10	Screen Failure	54	Female							<250 mg/day	Yes	No	No	No	No
Visit 1	28	Calcaneal spur removal left foot	surgeries	N/A		10_003		1995		1995		No		Yes	No								10	Screen Failure	54	Female							<250 mg/day	Yes	No	No	No	No
Visit 1	29	Latex allergy	allergies	Yes	Yes	10_003		1985				No		Yes	No								10	Screen Failure	54	Female							<250 mg/day	Yes	No	No	No	No
Visit 1	1	Allergic rhinitis	eyes, ears, nose, throat	Yes	Yes	10_004		1995				No		Yes	Yes		Ultrasound	No	07JAN16	07JAN2016			10	Entered	47	Male	01FEB16	172	MF4637	>=250 mg/day	No	No	>=250 mg/day	No	Yes	Yes	Yes	Yes
Visit 1	2	upper respiratory infection	eyes, ears, nose, throat	N/A		10_004	18OCT04	18OCT2004		OCT2004		No		Yes	Yes		Ultrasound	No	07JAN16	07JAN2016			10	Entered	47	Male	01FEB16	172	MF4637	>=250 mg/day	No	No	>=250 mg/day	No	Yes	Yes	Yes	Yes
Visit 1	3	acute sinusitis	eyes, ears, nose, throat	N/A		10_004	08NOV04	08NOV2004		NOV2004		No		Yes	Yes		Ultrasound	No	07JAN16	07JAN2016			10	Entered	47	Male	01FEB16	172	MF4637	>=250 mg/day	No	No	>=250 mg/day	No	Yes	Yes	Yes	Yes
Visit 1	4	sinusitis	eyes, ears, nose, throat	N/A		10_004	08APR06	08APR2006		APR2006		No		Yes	Yes		Ultrasound	No	07JAN16	07JAN2016			10	Entered	47	Male	01FEB16	172	MF4637	>=250 mg/day	No	No	>=250 mg/day	No	Yes	Yes	Yes	Yes
Visit 1	5	upper respiratory infection	eyes, ears, nose, throat	N/A		10_004	02DEC09	02DEC2009		DEC2009		No		Yes	Yes		Ultrasound	No	07JAN16	07JAN2016			10	Entered	47	Male	01FEB16	172	MF4637	>=250 mg/day	No	No	>=250 mg/day	No	Yes	Yes	Yes	Yes
Visit 1	6	conjunctivitis right eye	eyes, ears, nose, throat	N/A		10_004	14FEB11	14FEB2011		FEB2011		No		Yes	Yes		Ultrasound	No	07JAN16	07JAN2016			10	Entered	47	Male	01FEB16	172	MF4637	>=250 mg/day	No	No	>=250 mg/day	No	Yes	Yes	Yes	Yes
Visit 1	7	acute pharyngitis	eyes, ears, nose, throat	N/A		10_004	04JUN12	04JUN2012		JUN2012		No		Yes	Yes		Ultrasound	No	07JAN16	07JAN2016			10	Entered	47	Male	01FEB16	172	MF4637	>=250 mg/day	No	No	>=250 mg/day	No	Yes	Yes	Yes	Yes
Visit 1	8	upper respiratory infection	eyes, ears, nose, throat	N/A		10_004	24OCT12	24OCT2012		NOV2012		No		Yes	Yes		Ultrasound	No	07JAN16	07JAN2016			10	Entered	47	Male	01FEB16	172	MF4637	>=250 mg/day	No	No	>=250 mg/day	No	Yes	Yes	Yes	Yes
Visit 1	9	headache	eyes, ears, nose, throat	N/A		10_004	31OCT13	31OCT2013		NOV2013		No		Yes	Yes		Ultrasound	No	07JAN16	07JAN2016			10	Entered	47	Male	01FEB16	172	MF4637	>=250 mg/day	No	No	>=250 mg/day	No	Yes	Yes	Yes	Yes
Visit 1	10	blepharitis left eye	eyes, ears, nose, throat	N/A		10_004	11SEP15	11SEP2015		2015		No		Yes	Yes		Ultrasound	No	07JAN16	07JAN2016			10	Entered	47	Male	01FEB16	172	MF4637	>=250 mg/day	No	No	>=250 mg/day	No	Yes	Yes	Yes	Yes
Visit 1	11	elevated liver enzymes	liver	N/A		10_004		DEC2011	19JAN16	19JAN2016		No		Yes	Yes		Ultrasound	No	07JAN16	07JAN2016			10	Entered	47	Male	01FEB16	172	MF4637	>=250 mg/day	No	No	>=250 mg/day	No	Yes	Yes	Yes	Yes
Visit 1	12	Uric acid nephrolithiasis	genital/urinary	Yes	Yes	10_004		2004				No		Yes	Yes		Ultrasound	No	07JAN16	07JAN2016			10	Entered	47	Male	01FEB16	172	MF4637	>=250 mg/day	No	No	>=250 mg/day	No	Yes	Yes	Yes	Yes
Visit 1	13	intermittent right foot pain	musculoskeletal	N/A		10_004		2009		2011		No		Yes	Yes		Ultrasound	No	07JAN16	07JAN2016			10	Entered	47	Male	01FEB16	172	MF4637	>=250 mg/day	No	No	>=250 mg/day	No	Yes	Yes	Yes	Yes
Visit 1	14	Right ankle pain	musculoskeletal	N/A		10_004		2009		2015		No		Yes	Yes		Ultrasound	No	07JAN16	07JAN2016			10	Entered	47	Male	01FEB16	172	MF4637	>=250 mg/day	No	No	>=250 mg/day	No	Yes	Yes	Yes	Yes
Visit 1	15	non-cardiac chest pain	musculoskeletal	N/A		10_004		NOV2011		NOV2011		No		Yes	Yes		Ultrasound	No	07JAN16	07JAN2016			10	Entered	47	Male	01FEB16	172	MF4637	>=250 mg/day	No	No	>=250 mg/day	No	Yes	Yes	Yes	Yes
Visit 1	16	Right foot bone spur	musculoskeletal	N/A		10_004		AUG2011		AUG2011		No		Yes	Yes		Ultrasound	No	07JAN16	07JAN2016			10	Entered	47	Male	01FEB16	172	MF4637	>=250 mg/day	No	No	>=250 mg/day	No	Yes	Yes	Yes	Yes
Visit 1	17	Right torn labrum	musculoskeletal	N/A		10_004		2011		2011		No		Yes	Yes		Ultrasound	No	07JAN16	07JAN2016			10	Entered	47	Male	01FEB16	172	MF4637	>=250 mg/day	No	No	>=250 mg/day	No	Yes	Yes	Yes	Yes
Visit 1	18	abdominal pain	gastrointestinal	N/A		10_004	19DEC13	19DEC2013		2014		No		Yes	Yes		Ultrasound	No	07JAN16	07JAN2016			10	Entered	47	Male	01FEB16	172	MF4637	>=250 mg/day	No	No	>=250 mg/day	No	Yes	Yes	Yes	Yes
Visit 1	19	irritable bowel syndrome	gastrointestinal	Yes	Yes	10_004		DEC2015				No		Yes	Yes		Ultrasound	No	07JAN16	07JAN2016			10	Entered	47	Male	01FEB16	172	MF4637	>=250 mg/day	No	No	>=250 mg/day	No	Yes	Yes	Yes	Yes
Visit 1	20	benign prostatic hypertrophy	genital/urinary	Yes	Yes	10_004		2010				No		Yes	Yes		Ultrasound	No	07JAN16	07JAN2016			10	Entered	47	Male	01FEB16	172	MF4637	>=250 mg/day	No	No	>=250 mg/day	No	Yes	Yes	Yes	Yes
Visit 1	21	acute prostatitis	genital/urinary	N/A		10_004	19DEC13	19DEC2013		JAN2014		No		Yes	Yes		Ultrasound	No	07JAN16	07JAN2016			10	Entered	47	Male	01FEB16	172	MF4637	>=250 mg/day	No	No	>=250 mg/day	No	Yes	Yes	Yes	Yes
Visit 1	22	bone spur removal right foot	surgeries	N/A		10_004		AUG2011		AUG2011		No		Yes	Yes		Ultrasound	No	07JAN16	07JAN2016			10	Entered	47	Male	01FEB16	172	MF4637	>=250 mg/day	No	No	>=250 mg/day	No	Yes	Yes	Yes	Yes
Visit 1	23	right labrum repair	surgeries	N/A		10_004		2011		2011		No		Yes	Yes		Ultrasound	No	07JAN16	07JAN2016			10	Entered	47	Male	01FEB16	172	MF4637	>=250 mg/day	No	No	>=250 mg/day	No	Yes	Yes	Yes	Yes
Visit 1	24	vasectomy	surgeries	N/A		10_004		2013		2013		No		Yes	Yes		Ultrasound	No	07JAN16	07JAN2016			10	Entered	47	Male	01FEB16	172	MF4637	>=250 mg/day	No	No	>=250 mg/day	No	Yes	Yes	Yes	Yes
Visit 1	25	right ureteroscopy with lithotripsy	surgeries	N/A		10_004		2013		2013		No		Yes	Yes		Ultrasound	No	07JAN16	07JAN2016			10	Entered	47	Male	01FEB16	172	MF4637	>=250 mg/day	No	No	>=250 mg/day	No	Yes	Yes	Yes	Yes
Visit 1	26	right ureteroscopy with calculus removal	surgeries	N/A		10_004		2013		2013		No		Yes	Yes		Ultrasound	No	07JAN16	07JAN2016			10	Entered	47	Male	01FEB16	172	MF4637	>=250 mg/day	No	No	>=250 mg/day	No	Yes	Yes	Yes	Yes
Visit 2	1	Allergic rhinitis	eyes, ears, nose, throat	Yes	Yes	10_004		1995					No										10	Entered	47	Male	01FEB16	172	MF4637	>=250 mg/day	No	No	>=250 mg/day	No	Yes	Yes	Yes	Yes
Visit 2	2	upper respiratory infection	eyes, ears, nose, throat	N/A		10_004	18OCT04	18OCT2004		OCT2004			No										10	Entered	47	Male	01FEB16	172	MF4637	>=250 mg/day	No	No	>=250 mg/day	No	Yes	Yes	Yes	Yes
Visit 2	3	acute sinusitis	eyes, ears, nose, throat	N/A		10_004	08NOV04	08NOV2004		NOV2004			No										10	Entered	47	Male	01FEB16	172	MF4637	>=250 mg/day	No	No	>=250 mg/day	No	Yes	Yes	Yes	Yes
Visit 2	4	sinusitis	eyes, ears, nose, throat	N/A		10_004	08APR06	08APR2006		APR2006			No										10	Entered	47	Male	01FEB16	172	MF4637	>=250 mg/day	No	No	>=250 mg/day	No	Yes	Yes	Yes	Yes
Visit 2	5	upper respiratory infection	eyes, ears, nose, throat	N/A		10_004	02DEC09	02DEC2009		DEC2009			No										10	Entered	47	Male	01FEB16	172	MF4637	>=250 mg/day	No	No	>=250 mg/day	No	Yes	Yes	Yes	Yes
Visit 2	6	conjunctivitis right eye	eyes, ears, nose, throat	N/A		10_004	14FEB11	14FEB2011		FEB2011			No										10	Entered	47	Male	01FEB16	172	MF4637	>=250 mg/day	No	No	>=250 mg/day	No	Yes	Yes	Yes	Yes
Visit 2	7	acute pharyngitis	eyes, ears, nose, throat	N/A		10_004	04JUN12	04JUN2012		JUN2012			No										10	Entered	47	Male	01FEB16	172	MF4637	>=250 mg/day	No	No	>=250 mg/day	No	Yes	Yes	Yes	Yes
Visit 2	8	upper respiratory infection	eyes, ears, nose, throat	N/A		10_004	24OCT12	24OCT2012		NOV2012			No										10	Entered	47	Male	01FEB16	172	MF4637	>=250 mg/day	No	No	>=250 mg/day	No	Yes	Yes	Yes	Yes
Visit 2	9	headache	eyes, ears, nose, throat	N/A		10_004	31OCT13	31OCT2013		NOV2013			No										10	Entered	47	Male	01FEB16	172	MF4637	>=250 mg/day	No	No	>=250 mg/day	No	Yes	Yes	Yes	Yes
Visit 2	10	blepharitis left eye	eyes, ears, nose, throat	N/A		10_004	11SEP15	11SEP2015		2015			No										10	Entered	47	Male	01FEB16	172	MF4637	>=250 mg/day	No	No	>=250 mg/day	No	Yes	Yes	Yes	Yes
Visit 2	11	elevated liver enzymes	liver	N/A		10_004		DEC2011	19JAN16	19JAN2016			No										10	Entered	47	Male	01FEB16	172	MF4637	>=250 mg/day	No	No	>=250 mg/day	No	Yes	Yes	Yes	Yes
Visit 2	12	Uric acid nephrolithiasis	genital/urinary	Yes	Yes	10_004		2004					No										10	Entered	47	Male	01FEB16	172	MF4637	>=250 mg/day	No	No	>=250 mg/day	No	Yes	Yes	Yes	Yes
Visit 2	13	intermittent right foot pain	musculoskeletal	N/A		10_004		2009		2011			No										10	Entered	47	Male	01FEB16	172	MF4637	>=250 mg/day	No	No	>=250 mg/day	No	Yes	Yes	Yes	Yes
Visit 2	14	Right ankle pain	musculoskeletal	N/A		10_004		2009		2015			No										10	Entered	47	Male	01FEB16	172	MF4637	>=250 mg/day	No	No	>=250 mg/day	No	Yes	Yes	Yes	Yes
Visit 2	15	non-cardiac chest pain	musculoskeletal	N/A		10_004		NOV2011		NOV2011			No										10	Entered	47	Male	01FEB16	172	MF4637	>=250 mg/day	No	No	>=250 mg/day	No	Yes	Yes	Yes	Yes
Visit 2	16	Right foot bone spur	musculoskeletal	N/A		10_004		AUG2011		AUG2011			No										10	Entered	47	Male	01FEB16	172	MF4637	>=250 mg/day	No	No	>=250 mg/day	No	Yes	Yes	Yes	Yes
Visit 2	17	Right torn labrum	musculoskeletal	N/A		10_004		2011		2011			No										10	Entered	47	Male	01FEB16	172	MF4637	>=250 mg/day	No	No	>=250 mg/day	No	Yes	Yes	Yes	Yes
Visit 2	18	abdominal pain	gastrointestinal	N/A		10_004	19DEC13	19DEC2013		2014			No										10	Entered	47	Male	01FEB16	172	MF4637	>=250 mg/day	No	No	>=250 mg/day	No	Yes	Yes	Yes	Yes
Visit 2	19	irritable bowel syndrome	gastrointestinal	Yes	Yes	10_004		DEC2015					No										10	Entered	47	Male	01FEB16	172	MF4637	>=250 mg/day	No	No	>=250 mg/day	No	Yes	Yes	Yes	Yes
Visit 2	20	benign prostatic hypertrophy	genital/urinary	Yes	Yes	10_004		2010					No										10	Entered	47	Male	01FEB16	172	MF4637	>=250 mg/day	No	No	>=250 mg/day	No	Yes	Yes	Yes	Yes
Visit 2	21	acute prostatitis	genital/urinary	N/A		10_004	19DEC13	19DEC2013		JAN2014			No										10	Entered	47	Male	01FEB16	172	MF4637	>=250 mg/day	No	No	>=250 mg/day	No	Yes	Yes	Yes	Yes
Visit 2	22	bone spur removal right foot	surgeries	N/A		10_004		AUG2011		AUG2011			No										10	Entered	47	Male	01FEB16	172	MF4637	>=250 mg/day	No	No	>=250 mg/day	No	Yes	Yes	Yes	Yes
Visit 2	23	right labrum repair	surgeries	N/A		10_004		2011		2011			No										10	Entered	47	Male	01FEB16	172	MF4637	>=250 mg/day	No	No	>=250 mg/day	No	Yes	Yes	Yes	Yes
Visit 2	24	vasectomy	surgeries	N/A		10_004		2013		2013			No										10	Entered	47	Male	01FEB16	172	MF4637	>=250 mg/day	No	No	>=250 mg/day	No	Yes	Yes	Yes	Yes
Visit 2	25	right ureteroscopy with lithotripsy	surgeries	N/A		10_004		2013		2013			No										10	Entered	47	Male	01FEB16	172	MF4637	>=250 mg/day	No	No	>=250 mg/day	No	Yes	Yes	Yes	Yes
Visit 2	26	right ureteroscopy with calculus removal	surgeries	N/A		10_004		2013		2013			No										10	Entered	47	Male	01FEB16	172	MF4637	>=250 mg/day	No	No	>=250 mg/day	No	Yes	Yes	Yes	Yes
Visit 1	1	tinnitus	eyes, ears, nose, throat	Yes	Yes	10_006		1995				No		Yes	No	Yes		No			18FEB16	18FEB2016	10	Entered	55	Male	25FEB16	174	Placebo	<250 mg/day	No	No	<250 mg/day	No	Yes	Yes	Yes	Yes
Visit 1	2	upper respiratory infection	eyes, ears, nose, throat	N/A		10_006		MAY2008		JUL2008		No		Yes	No	Yes		No			18FEB16	18FEB2016	10	Entered	55	Male	25FEB16	174	Placebo	<250 mg/day	No	No	<250 mg/day	No	Yes	Yes	Yes	Yes
Visit 1	3	upper respiratory infection	eyes, ears, nose, throat	N/A		10_006	16NOV11	16NOV2011		NOV2011		No		Yes	No	Yes		No			18FEB16	18FEB2016	10	Entered	55	Male	25FEB16	174	Placebo	<250 mg/day	No	No	<250 mg/day	No	Yes	Yes	Yes	Yes
Visit 1	4	near sighted	eyes, ears, nose, throat	Yes	Yes	10_006		1975				No		Yes	No	Yes		No			18FEB16	18FEB2016	10	Entered	55	Male	25FEB16	174	Placebo	<250 mg/day	No	No	<250 mg/day	No	Yes	Yes	Yes	Yes
Visit 1	5	dry scalp	dermatological	Yes	Yes	10_006		1980				No		Yes	No	Yes		No			18FEB16	18FEB2016	10	Entered	55	Male	25FEB16	174	Placebo	<250 mg/day	No	No	<250 mg/day	No	Yes	Yes	Yes	Yes
Visit 1	6	skin tag on neck	dermatological	N/A		10_006	27APR11	27APR2011	17MAY11	17MAY2011		No		Yes	No	Yes		No			18FEB16	18FEB2016	10	Entered	55	Male	25FEB16	174	Placebo	<250 mg/day	No	No	<250 mg/day	No	Yes	Yes	Yes	Yes
Visit 1	7	numbness right fifth diget	neurological	N/A		10_006	13AUG13	13AUG2013	28OCT14	28OCT2014		No		Yes	No	Yes		No			18FEB16	18FEB2016	10	Entered	55	Male	25FEB16	174	Placebo	<250 mg/day	No	No	<250 mg/day	No	Yes	Yes	Yes	Yes
Visit 1	8	numbness left thumb	neurological	N/A		10_006	13AUG13	13AUG2013	28OCT14	28OCT2014		No		Yes	No	Yes		No			18FEB16	18FEB2016	10	Entered	55	Male	25FEB16	174	Placebo	<250 mg/day	No	No	<250 mg/day	No	Yes	Yes	Yes	Yes
Visit 1	9	sinus bradycardia	cardiovascular	Yes	Yes	10_006	13AUG13	13AUG2013				No		Yes	No	Yes		No			18FEB16	18FEB2016	10	Entered	55	Male	25FEB16	174	Placebo	<250 mg/day	No	No	<250 mg/day	No	Yes	Yes	Yes	Yes
Visit 1	10	hyperglycemia	endocrine	Yes	Yes	10_006	28OCT14	28OCT2014				No		Yes	No	Yes		No			18FEB16	18FEB2016	10	Entered	55	Male	25FEB16	174	Placebo	<250 mg/day	No	No	<250 mg/day	No	Yes	Yes	Yes	Yes
Visit 1	11	low back pain	musculoskeletal	N/A		10_006	16JAN09	16JAN2009		2009		No		Yes	No	Yes		No			18FEB16	18FEB2016	10	Entered	55	Male	25FEB16	174	Placebo	<250 mg/day	No	No	<250 mg/day	No	Yes	Yes	Yes	Yes
Visit 1	12	anxiety	psychological	Yes	Yes	10_006		2006				No		Yes	No	Yes		No			18FEB16	18FEB2016	10	Entered	55	Male	25FEB16	174	Placebo	<250 mg/day	No	No	<250 mg/day	No	Yes	Yes	Yes	Yes
Visit 1	13	Depression	psychological	Yes	Yes	10_006		2006				No		Yes	No	Yes		No			18FEB16	18FEB2016	10	Entered	55	Male	25FEB16	174	Placebo	<250 mg/day	No	No	<250 mg/day	No	Yes	Yes	Yes	Yes
Visit 1	14	insomnia	psychological	Yes	Yes	10_006		2006				No		Yes	No	Yes		No			18FEB16	18FEB2016	10	Entered	55	Male	25FEB16	174	Placebo	<250 mg/day	No	No	<250 mg/day	No	Yes	Yes	Yes	Yes
Visit 1	15	Compulsive Gambling	psychological	Yes	Yes	10_006	13AUG13	13AUG2013				No		Yes	No	Yes		No			18FEB16	18FEB2016	10	Entered	55	Male	25FEB16	174	Placebo	<250 mg/day	No	No	<250 mg/day	No	Yes	Yes	Yes	Yes
Visit 1	16	recurrent sore throat	eyes, ears, nose, throat	N/A		10_006		1966		1966		No		Yes	No	Yes		No			18FEB16	18FEB2016	10	Entered	55	Male	25FEB16	174	Placebo	<250 mg/day	No	No	<250 mg/day	No	Yes	Yes	Yes	Yes
Visit 1	17	Tonsillectomy	surgeries	N/A		10_006		1966		1966		No		Yes	No	Yes		No			18FEB16	18FEB2016	10	Entered	55	Male	25FEB16	174	Placebo	<250 mg/day	No	No	<250 mg/day	No	Yes	Yes	Yes	Yes
Visit 1	18	heartburn	gastrointestinal	Yes	Yes	10_006		2000				No		Yes	No	Yes		No			18FEB16	18FEB2016	10	Entered	55	Male	25FEB16	174	Placebo	<250 mg/day	No	No	<250 mg/day	No	Yes	Yes	Yes	Yes
Visit 1	19	hyperlipidemia	cardiovascular	Yes	Yes	10_006	28JAN16	28JAN2016				No		Yes	No	Yes		No			18FEB16	18FEB2016	10	Entered	55	Male	25FEB16	174	Placebo	<250 mg/day	No	No	<250 mg/day	No	Yes	Yes	Yes	Yes
Visit 1	20	elevated liver enzymes	endocrine	Yes	Yes	10_006	28JAN16	28JAN2016				No		Yes	No	Yes		No			18FEB16	18FEB2016	10	Entered	55	Male	25FEB16	174	Placebo	<250 mg/day	No	No	<250 mg/day	No	Yes	Yes	Yes	Yes
Visit 2	1	tinnitus	eyes, ears, nose, throat	Yes	Yes	10_006		1995					No										10	Entered	55	Male	25FEB16	174	Placebo	<250 mg/day	No	No	<250 mg/day	No	Yes	Yes	Yes	Yes
Visit 2	2	upper respiratory infection	eyes, ears, nose, throat	N/A		10_006		MAY2008		JUL2008			No										10	Entered	55	Male	25FEB16	174	Placebo	<250 mg/day	No	No	<250 mg/day	No	Yes	Yes	Yes	Yes
Visit 2	3	upper respiratory infection	eyes, ears, nose, throat	N/A		10_006	16NOV11	16NOV2011		NOV2011			No										10	Entered	55	Male	25FEB16	174	Placebo	<250 mg/day	No	No	<250 mg/day	No	Yes	Yes	Yes	Yes
Visit 2	4	near sighted	eyes, ears, nose, throat	Yes	Yes	10_006		1975					No										10	Entered	55	Male	25FEB16	174	Placebo	<250 mg/day	No	No	<250 mg/day	No	Yes	Yes	Yes	Yes
Visit 2	5	dry scalp	dermatological	Yes	Yes	10_006		1980					No										10	Entered	55	Male	25FEB16	174	Placebo	<250 mg/day	No	No	<250 mg/day	No	Yes	Yes	Yes	Yes
Visit 2	6	skin tag on neck	dermatological	N/A		10_006	27APR11	27APR2011	17MAY11	17MAY2011			No										10	Entered	55	Male	25FEB16	174	Placebo	<250 mg/day	No	No	<250 mg/day	No	Yes	Yes	Yes	Yes
Visit 2	7	numbness right fifth diget	neurological	N/A		10_006	13AUG13	13AUG2013	28OCT14	28OCT2014			No										10	Entered	55	Male	25FEB16	174	Placebo	<250 mg/day	No	No	<250 mg/day	No	Yes	Yes	Yes	Yes
Visit 2	8	numbness left thumb	neurological	N/A		10_006	13AUG13	13AUG2013	28OCT14	28OCT2014			No										10	Entered	55	Male	25FEB16	174	Placebo	<250 mg/day	No	No	<250 mg/day	No	Yes	Yes	Yes	Yes
Visit 2	9	sinus bradycardia	cardiovascular	Yes	Yes	10_006	13AUG13	13AUG2013					No										10	Entered	55	Male	25FEB16	174	Placebo	<250 mg/day	No	No	<250 mg/day	No	Yes	Yes	Yes	Yes
Visit 2	10	hyperglycemia	endocrine	Yes	Yes	10_006	28OCT14	28OCT2014					No										10	Entered	55	Male	25FEB16	174	Placebo	<250 mg/day	No	No	<250 mg/day	No	Yes	Yes	Yes	Yes
Visit 2	11	low back pain	musculoskeletal	N/A		10_006	16JAN09	16JAN2009		2009			No										10	Entered	55	Male	25FEB16	174	Placebo	<250 mg/day	No	No	<250 mg/day	No	Yes	Yes	Yes	Yes
Visit 2	12	anxiety	psychological	Yes	Yes	10_006		2006					No										10	Entered	55	Male	25FEB16	174	Placebo	<250 mg/day	No	No	<250 mg/day	No	Yes	Yes	Yes	Yes
Visit 2	13	Depression	psychological	Yes	Yes	10_006		2006					No										10	Entered	55	Male	25FEB16	174	Placebo	<250 mg/day	No	No	<250 mg/day	No	Yes	Yes	Yes	Yes
Visit 2	14	insomnia	psychological	Yes	Yes	10_006		2006					No										10	Entered	55	Male	25FEB16	174	Placebo	<250 mg/day	No	No	<250 mg/day	No	Yes	Yes	Yes	Yes
Visit 2	15	Compulsive Gambling	psychological	Yes	Yes	10_006	13AUG13	13AUG2013					No										10	Entered	55	Male	25FEB16	174	Placebo	<250 mg/day	No	No	<250 mg/day	No	Yes	Yes	Yes	Yes
Visit 2	16	recurrent sore throat	eyes, ears, nose, throat	N/A		10_006		1966		1966			No										10	Entered	55	Male	25FEB16	174	Placebo	<250 mg/day	No	No	<250 mg/day	No	Yes	Yes	Yes	Yes
Visit 2	17	Tonsillectomy	surgeries	N/A		10_006		1966		1966			No										10	Entered	55	Male	25FEB16	174	Placebo	<250 mg/day	No	No	<250 mg/day	No	Yes	Yes	Yes	Yes
Visit 2	18	heartburn	gastrointestinal	Yes	Yes	10_006		2000					No										10	Entered	55	Male	25FEB16	174	Placebo	<250 mg/day	No	No	<250 mg/day	No	Yes	Yes	Yes	Yes
Visit 2	19	hyperlipidemia	cardiovascular	Yes	Yes	10_006	28JAN16	28JAN2016					No										10	Entered	55	Male	25FEB16	174	Placebo	<250 mg/day	No	No	<250 mg/day	No	Yes	Yes	Yes	Yes
Visit 2	20	elevated liver enzymes	endocrine	Yes	Yes	10_006	28JAN16	28JAN2016					No										10	Entered	55	Male	25FEB16	174	Placebo	<250 mg/day	No	No	<250 mg/day	No	Yes	Yes	Yes	Yes
Visit 1	1	allergic rhinitis	eyes, ears, nose, throat	Yes	Yes	10_007		2010				No		Yes	Yes		Ultrasound	No	16FEB16	16FEB2016			10	Entered	54	Female	01MAR16	173	MF4637	<250 mg/day	No	Yes	<250 mg/day	No	Yes	Yes	Yes	Yes
Visit 1	2	conjunctivitis left eye	eyes, ears, nose, throat	N/A		10_007	29MAR13	29MAR2013		APR2013		No		Yes	Yes		Ultrasound	No	16FEB16	16FEB2016			10	Entered	54	Female	01MAR16	173	MF4637	<250 mg/day	No	Yes	<250 mg/day	No	Yes	Yes	Yes	Yes
Visit 1	3	tinea under left breast	dermatological	N/A		10_007	08JUN13	08JUN2013		JUN2013		No		Yes	Yes		Ultrasound	No	16FEB16	16FEB2016			10	Entered	54	Female	01MAR16	173	MF4637	<250 mg/day	No	Yes	<250 mg/day	No	Yes	Yes	Yes	Yes
Visit 1	4	poison ivy left forearm	dermatological	N/A		10_007	11JUL13	11JUL2013		JUL2013		No		Yes	Yes		Ultrasound	No	16FEB16	16FEB2016			10	Entered	54	Female	01MAR16	173	MF4637	<250 mg/day	No	Yes	<250 mg/day	No	Yes	Yes	Yes	Yes
Visit 1	5	Rash on abdomen	dermatological	N/A		10_007		NOV2013		DEC2013		No		Yes	Yes		Ultrasound	No	16FEB16	16FEB2016			10	Entered	54	Female	01MAR16	173	MF4637	<250 mg/day	No	Yes	<250 mg/day	No	Yes	Yes	Yes	Yes
Visit 1	6	skin tags right breast	dermatological	N/A		10_007		2014	04APR14	04APR2014		No		Yes	Yes		Ultrasound	No	16FEB16	16FEB2016			10	Entered	54	Female	01MAR16	173	MF4637	<250 mg/day	No	Yes	<250 mg/day	No	Yes	Yes	Yes	Yes
Visit 1	7	diabetic neuropathy	neurological	Yes	Yes	10_007		2014				No		Yes	Yes		Ultrasound	No	16FEB16	16FEB2016			10	Entered	54	Female	01MAR16	173	MF4637	<250 mg/day	No	Yes	<250 mg/day	No	Yes	Yes	Yes	Yes
Visit 1	8	restless leg syndrome	neurological	Yes	Yes	10_007		JAN2015				No		Yes	Yes		Ultrasound	No	16FEB16	16FEB2016			10	Entered	54	Female	01MAR16	173	MF4637	<250 mg/day	No	Yes	<250 mg/day	No	Yes	Yes	Yes	Yes
Visit 1	9	insomnia	neurological	Yes	Yes	10_007		2014				No		Yes	Yes		Ultrasound	No	16FEB16	16FEB2016			10	Entered	54	Female	01MAR16	173	MF4637	<250 mg/day	No	Yes	<250 mg/day	No	Yes	Yes	Yes	Yes
Visit 1	10	hypertension	cardiovascular	Yes	Yes	10_007		2003				No		Yes	Yes		Ultrasound	No	16FEB16	16FEB2016			10	Entered	54	Female	01MAR16	173	MF4637	<250 mg/day	No	Yes	<250 mg/day	No	Yes	Yes	Yes	Yes
Visit 1	11	dyslipidemia	cardiovascular	Yes	Yes	10_007		2003				No		Yes	Yes		Ultrasound	No	16FEB16	16FEB2016			10	Entered	54	Female	01MAR16	173	MF4637	<250 mg/day	No	Yes	<250 mg/day	No	Yes	Yes	Yes	Yes
Visit 1	12	elevated liver enzymes	liver	Yes	Yes	10_007		APR2012				No		Yes	Yes		Ultrasound	No	16FEB16	16FEB2016			10	Entered	54	Female	01MAR16	173	MF4637	<250 mg/day	No	Yes	<250 mg/day	No	Yes	Yes	Yes	Yes
Visit 1	13	hypothyroidism	endocrine	Yes	Yes	10_007	19JUL12	19JUL2012				No		Yes	Yes		Ultrasound	No	16FEB16	16FEB2016			10	Entered	54	Female	01MAR16	173	MF4637	<250 mg/day	No	Yes	<250 mg/day	No	Yes	Yes	Yes	Yes
Visit 1	14	calcaneal spur left foot	musculoskeletal	N/A		10_007		1995		1995		No		Yes	Yes		Ultrasound	No	16FEB16	16FEB2016			10	Entered	54	Female	01MAR16	173	MF4637	<250 mg/day	No	Yes	<250 mg/day	No	Yes	Yes	Yes	Yes
Visit 1	15	hiatal hernia	musculoskeletal	N/A		10_007		2005		2005		No		Yes	Yes		Ultrasound	No	16FEB16	16FEB2016			10	Entered	54	Female	01MAR16	173	MF4637	<250 mg/day	No	Yes	<250 mg/day	No	Yes	Yes	Yes	Yes
Visit 1	16	Left foot pain	musculoskeletal	Yes	Yes	10_007		OCT2013				No		Yes	Yes		Ultrasound	No	16FEB16	16FEB2016			10	Entered	54	Female	01MAR16	173	MF4637	<250 mg/day	No	Yes	<250 mg/day	No	Yes	Yes	Yes	Yes
Visit 1	17	osteoarthritis	musculoskeletal	Yes	Yes	10_007		2000				No		Yes	Yes		Ultrasound	No	16FEB16	16FEB2016			10	Entered	54	Female	01MAR16	173	MF4637	<250 mg/day	No	Yes	<250 mg/day	No	Yes	Yes	Yes	Yes
Visit 1	18	ventral hernia	musculoskeletal	N/A		10_007		2005		2005		No		Yes	Yes		Ultrasound	No	16FEB16	16FEB2016			10	Entered	54	Female	01MAR16	173	MF4637	<250 mg/day	No	Yes	<250 mg/day	No	Yes	Yes	Yes	Yes
Visit 1	19	low back pain	musculoskeletal	Yes	Yes	10_007		DEC2012				No		Yes	Yes		Ultrasound	No	16FEB16	16FEB2016			10	Entered	54	Female	01MAR16	173	MF4637	<250 mg/day	No	Yes	<250 mg/day	No	Yes	Yes	Yes	Yes
Visit 1	20	depression	psychological	Yes	Yes	10_007		1995				No		Yes	Yes		Ultrasound	No	16FEB16	16FEB2016			10	Entered	54	Female	01MAR16	173	MF4637	<250 mg/day	No	Yes	<250 mg/day	No	Yes	Yes	Yes	Yes
Visit 1	21	gastroesophageal reflux disease	gastrointestinal	Yes	Yes	10_007		2013				No		Yes	Yes		Ultrasound	No	16FEB16	16FEB2016			10	Entered	54	Female	01MAR16	173	MF4637	<250 mg/day	No	Yes	<250 mg/day	No	Yes	Yes	Yes	Yes
Visit 1	22	abnormal uterine bleeding	genital/urinary	N/A		10_007		1999		1999		No		Yes	Yes		Ultrasound	No	16FEB16	16FEB2016			10	Entered	54	Female	01MAR16	173	MF4637	<250 mg/day	No	Yes	<250 mg/day	No	Yes	Yes	Yes	Yes
Visit 1	23	postmenopausal	genital/urinary	Yes	Yes	10_007		2000				No		Yes	Yes		Ultrasound	No	16FEB16	16FEB2016			10	Entered	54	Female	01MAR16	173	MF4637	<250 mg/day	No	Yes	<250 mg/day	No	Yes	Yes	Yes	Yes
Visit 1	24	total abdominal hysterectomy	genital/urinary	N/A		10_007		1999		1999		No		Yes	Yes		Ultrasound	No	16FEB16	16FEB2016			10	Entered	54	Female	01MAR16	173	MF4637	<250 mg/day	No	Yes	<250 mg/day	No	Yes	Yes	Yes	Yes
Visit 1	25	unilateral salpingoophorectomy	genital/urinary	N/A		10_007		1999		1999		No		Yes	Yes		Ultrasound	No	16FEB16	16FEB2016			10	Entered	54	Female	01MAR16	173	MF4637	<250 mg/day	No	Yes	<250 mg/day	No	Yes	Yes	Yes	Yes
Visit 1	26	ventral hernia repair	musculoskeletal	N/A		10_007		2005		2005		No		Yes	Yes		Ultrasound	No	16FEB16	16FEB2016			10	Entered	54	Female	01MAR16	173	MF4637	<250 mg/day	No	Yes	<250 mg/day	No	Yes	Yes	Yes	Yes
Visit 1	27	hiatal hernia repair	musculoskeletal	N/A		10_007		2005		2005		No		Yes	Yes		Ultrasound	No	16FEB16	16FEB2016			10	Entered	54	Female	01MAR16	173	MF4637	<250 mg/day	No	Yes	<250 mg/day	No	Yes	Yes	Yes	Yes
Visit 1	28	calcaneal spur removal left foot	musculoskeletal	N/A		10_007		1995		1995		No		Yes	Yes		Ultrasound	No	16FEB16	16FEB2016			10	Entered	54	Female	01MAR16	173	MF4637	<250 mg/day	No	Yes	<250 mg/day	No	Yes	Yes	Yes	Yes
Visit 1	29	latex allergy	allergies	Yes	Yes	10_007		1985				No		Yes	Yes		Ultrasound	No	16FEB16	16FEB2016			10	Entered	54	Female	01MAR16	173	MF4637	<250 mg/day	No	Yes	<250 mg/day	No	Yes	Yes	Yes	Yes
Visit 2	1	allergic rhinitis	eyes, ears, nose, throat	Yes	Yes	10_007		2010					Yes										10	Entered	54	Female	01MAR16	173	MF4637	<250 mg/day	No	Yes	<250 mg/day	No	Yes	Yes	Yes	Yes
Visit 2	2	conjunctivitis left eye	eyes, ears, nose, throat	N/A		10_007	29MAR13	29MAR2013		APR2013			Yes										10	Entered	54	Female	01MAR16	173	MF4637	<250 mg/day	No	Yes	<250 mg/day	No	Yes	Yes	Yes	Yes
Visit 2	3	tinea under left breast	dermatological	N/A		10_007	08JUN13	08JUN2013		JUN2013			Yes										10	Entered	54	Female	01MAR16	173	MF4637	<250 mg/day	No	Yes	<250 mg/day	No	Yes	Yes	Yes	Yes
Visit 2	4	poison ivy left forearm	dermatological	N/A		10_007	11JUL13	11JUL2013		JUL2013			Yes										10	Entered	54	Female	01MAR16	173	MF4637	<250 mg/day	No	Yes	<250 mg/day	No	Yes	Yes	Yes	Yes
Visit 2	5	Rash on abdomen	dermatological	N/A		10_007		NOV2013		DEC2013			Yes										10	Entered	54	Female	01MAR16	173	MF4637	<250 mg/day	No	Yes	<250 mg/day	No	Yes	Yes	Yes	Yes
Visit 2	6	skin tags right breast	dermatological	N/A		10_007		2014	04APR14	04APR2014			Yes										10	Entered	54	Female	01MAR16	173	MF4637	<250 mg/day	No	Yes	<250 mg/day	No	Yes	Yes	Yes	Yes
Visit 2	7	diabetic neuropathy	neurological	Yes	Yes	10_007		2014					Yes										10	Entered	54	Female	01MAR16	173	MF4637	<250 mg/day	No	Yes	<250 mg/day	No	Yes	Yes	Yes	Yes
Visit 2	8	restless leg syndrome	neurological	Yes	Yes	10_007		JAN2015					Yes										10	Entered	54	Female	01MAR16	173	MF4637	<250 mg/day	No	Yes	<250 mg/day	No	Yes	Yes	Yes	Yes
Visit 2	9	insomnia	neurological	Yes	Yes	10_007		2014					Yes										10	Entered	54	Female	01MAR16	173	MF4637	<250 mg/day	No	Yes	<250 mg/day	No	Yes	Yes	Yes	Yes
Visit 2	10	hypertension	cardiovascular	Yes	Yes	10_007		2003					Yes										10	Entered	54	Female	01MAR16	173	MF4637	<250 mg/day	No	Yes	<250 mg/day	No	Yes	Yes	Yes	Yes
Visit 2	11	dyslipidemia	cardiovascular	Yes	Yes	10_007		2003					Yes										10	Entered	54	Female	01MAR16	173	MF4637	<250 mg/day	No	Yes	<250 mg/day	No	Yes	Yes	Yes	Yes
Visit 2	12	elevated liver enzymes	liver	Yes	Yes	10_007		APR2012					Yes										10	Entered	54	Female	01MAR16	173	MF4637	<250 mg/day	No	Yes	<250 mg/day	No	Yes	Yes	Yes	Yes
Visit 2	13	hypothyroidism	endocrine	Yes	Yes	10_007	19JUL12	19JUL2012					Yes										10	Entered	54	Female	01MAR16	173	MF4637	<250 mg/day	No	Yes	<250 mg/day	No	Yes	Yes	Yes	Yes
Visit 2	14	calcaneal spur left foot	musculoskeletal	N/A		10_007		1995		1995			Yes										10	Entered	54	Female	01MAR16	173	MF4637	<250 mg/day	No	Yes	<250 mg/day	No	Yes	Yes	Yes	Yes
Visit 2	15	hiatal hernia	musculoskeletal	N/A		10_007		2005		2005			Yes										10	Entered	54	Female	01MAR16	173	MF4637	<250 mg/day	No	Yes	<250 mg/day	No	Yes	Yes	Yes	Yes
Visit 2	16	Left foot pain	musculoskeletal	Yes	Yes	10_007		OCT2013					Yes										10	Entered	54	Female	01MAR16	173	MF4637	<250 mg/day	No	Yes	<250 mg/day	No	Yes	Yes	Yes	Yes
Visit 2	17	osteoarthritis	musculoskeletal	Yes	Yes	10_007		2000					Yes										10	Entered	54	Female	01MAR16	173	MF4637	<250 mg/day	No	Yes	<250 mg/day	No	Yes	Yes	Yes	Yes
Visit 2	18	ventral hernia	musculoskeletal	N/A		10_007		2005		2005			Yes										10	Entered	54	Female	01MAR16	173	MF4637	<250 mg/day	No	Yes	<250 mg/day	No	Yes	Yes	Yes	Yes
Visit 2	19	low back pain	musculoskeletal	Yes	Yes	10_007		DEC2012					Yes										10	Entered	54	Female	01MAR16	173	MF4637	<250 mg/day	No	Yes	<250 mg/day	No	Yes	Yes	Yes	Yes
Visit 2	20	depression	psychological	Yes	Yes	10_007		1995					Yes										10	Entered	54	Female	01MAR16	173	MF4637	<250 mg/day	No	Yes	<250 mg/day	No	Yes	Yes	Yes	Yes
Visit 2	21	gastroesophageal reflux disease	gastrointestinal	Yes	Yes	10_007		2013					Yes										10	Entered	54	Female	01MAR16	173	MF4637	<250 mg/day	No	Yes	<250 mg/day	No	Yes	Yes	Yes	Yes
Visit 2	22	abnormal uterine bleeding	genital/urinary	N/A		10_007		1999		1999			Yes										10	Entered	54	Female	01MAR16	173	MF4637	<250 mg/day	No	Yes	<250 mg/day	No	Yes	Yes	Yes	Yes
Visit 2	23	postmenopausal	genital/urinary	Yes	Yes	10_007		2000					Yes										10	Entered	54	Female	01MAR16	173	MF4637	<250 mg/day	No	Yes	<250 mg/day	No	Yes	Yes	Yes	Yes
Visit 2	24	total abdominal hysterectomy	genital/urinary	N/A		10_007		1999		1999			Yes										10	Entered	54	Female	01MAR16	173	MF4637	<250 mg/day	No	Yes	<250 mg/day	No	Yes	Yes	Yes	Yes
Visit 2	25	unilateral salpingoophorectomy	genital/urinary	N/A		10_007		1999		1999			Yes										10	Entered	54	Female	01MAR16	173	MF4637	<250 mg/day	No	Yes	<250 mg/day	No	Yes	Yes	Yes	Yes
Visit 2	26	ventral hernia repair	musculoskeletal	N/A		10_007		2005		2005			Yes										10	Entered	54	Female	01MAR16	173	MF4637	<250 mg/day	No	Yes	<250 mg/day	No	Yes	Yes	Yes	Yes
Visit 2	27	hiatal hernia repair	musculoskeletal	N/A		10_007		2005		2005			Yes										10	Entered	54	Female	01MAR16	173	MF4637	<250 mg/day	No	Yes	<250 mg/day	No	Yes	Yes	Yes	Yes
Visit 2	28	calcaneal spur removal left foot	musculoskeletal	N/A		10_007		1995		1995			Yes										10	Entered	54	Female	01MAR16	173	MF4637	<250 mg/day	No	Yes	<250 mg/day	No	Yes	Yes	Yes	Yes
Visit 2	29	latex allergy	allergies	Yes	Yes	10_007		1985					Yes										10	Entered	54	Female	01MAR16	173	MF4637	<250 mg/day	No	Yes	<250 mg/day	No	Yes	Yes	Yes	Yes
Visit 1	1	Tinnitus	eyes, ears, nose, throat	N/A		10_009		2014		2015		No		Yes	Yes		Ultrasound	No	07APR16	07APR2016			10	Entered	64	Female	27JUN16	176	MF4637	<250 mg/day	No	No	<250 mg/day	No	Yes	Yes	Yes	Yes
Visit 1	2	halatosis	eyes, ears, nose, throat	N/A		10_009	15MAY06	15MAY2006	01JUN06	01JUN2006		No		Yes	Yes		Ultrasound	No	07APR16	07APR2016			10	Entered	64	Female	27JUN16	176	MF4637	<250 mg/day	No	No	<250 mg/day	No	Yes	Yes	Yes	Yes
Visit 1	3	common cold	eyes, ears, nose, throat	N/A		10_009	15MAY16	15MAY2016	01JUN16	01JUN2016		No		Yes	Yes		Ultrasound	No	07APR16	07APR2016			10	Entered	64	Female	27JUN16	176	MF4637	<250 mg/day	No	No	<250 mg/day	No	Yes	Yes	Yes	Yes
Visit 1	4	candidiasis of mouth	eyes, ears, nose, throat	N/A		10_009	22JUN10	22JUN2010		2010		No		Yes	Yes		Ultrasound	No	07APR16	07APR2016			10	Entered	64	Female	27JUN16	176	MF4637	<250 mg/day	No	No	<250 mg/day	No	Yes	Yes	Yes	Yes
Visit 1	5	herpes sona	eyes, ears, nose, throat	N/A		10_009	10DEC15	10DEC2015		JAN2016		No		Yes	Yes		Ultrasound	No	07APR16	07APR2016			10	Entered	64	Female	27JUN16	176	MF4637	<250 mg/day	No	No	<250 mg/day	No	Yes	Yes	Yes	Yes
Visit 1	6	dermatosis	dermatological	N/A		10_009	21NOV13	21NOV2013		JAN2014		No		Yes	Yes		Ultrasound	No	07APR16	07APR2016			10	Entered	64	Female	27JUN16	176	MF4637	<250 mg/day	No	No	<250 mg/day	No	Yes	Yes	Yes	Yes
Visit 1	7	tick bite on scalp	dermatological	N/A		10_009	19AUG11	19AUG2011		SEP2011		No		Yes	Yes		Ultrasound	No	07APR16	07APR2016			10	Entered	64	Female	27JUN16	176	MF4637	<250 mg/day	No	No	<250 mg/day	No	Yes	Yes	Yes	Yes
Visit 1	8	nevis on back	dermatological	N/A		10_009	14DEC06	14DEC2006	14DEC06	14DEC2006		No		Yes	Yes		Ultrasound	No	07APR16	07APR2016			10	Entered	64	Female	27JUN16	176	MF4637	<250 mg/day	No	No	<250 mg/day	No	Yes	Yes	Yes	Yes
Visit 1	9	dermatitis	dermatological	N/A		10_009	22MAR08	22MAR2008		OCT2008		No		Yes	Yes		Ultrasound	No	07APR16	07APR2016			10	Entered	64	Female	27JUN16	176	MF4637	<250 mg/day	No	No	<250 mg/day	No	Yes	Yes	Yes	Yes
Visit 1	10	eczema	dermatological	N/A		10_009	09DEC10	09DEC2010		JAN2011		No		Yes	Yes		Ultrasound	No	07APR16	07APR2016			10	Entered	64	Female	27JUN16	176	MF4637	<250 mg/day	No	No	<250 mg/day	No	Yes	Yes	Yes	Yes
Visit 1	11	basal cell carcinoma on back	dermatological	N/A		10_009		2006		2006		No		Yes	Yes		Ultrasound	No	07APR16	07APR2016			10	Entered	64	Female	27JUN16	176	MF4637	<250 mg/day	No	No	<250 mg/day	No	Yes	Yes	Yes	Yes
Visit 1	12	numbness bilateral arms	neurological	N/A		10_009	15MAY06	15MAY2006	14DEC06	14DEC2006		No		Yes	Yes		Ultrasound	No	07APR16	07APR2016			10	Entered	64	Female	27JUN16	176	MF4637	<250 mg/day	No	No	<250 mg/day	No	Yes	Yes	Yes	Yes
Visit 1	13	hyperlipidemia	cardiovascular	Yes	Yes	10_009	15MAY06	15MAY2006				No		Yes	Yes		Ultrasound	No	07APR16	07APR2016			10	Entered	64	Female	27JUN16	176	MF4637	<250 mg/day	No	No	<250 mg/day	No	Yes	Yes	Yes	Yes
Visit 1	14	elevated liver enzymes	liver	Yes	Yes	10_009	29MAR16	29MAR2016				No		Yes	Yes		Ultrasound	No	07APR16	07APR2016			10	Entered	64	Female	27JUN16	176	MF4637	<250 mg/day	No	No	<250 mg/day	No	Yes	Yes	Yes	Yes
Visit 1	15	obesity	endocrine	Yes	Yes	10_009	21NOV13	21NOV2013				No		Yes	Yes		Ultrasound	No	07APR16	07APR2016			10	Entered	64	Female	27JUN16	176	MF4637	<250 mg/day	No	No	<250 mg/day	No	Yes	Yes	Yes	Yes
Visit 1	16	non-cardiac chest pain	musculoskeletal	N/A		10_009	10DEC04	10DEC2004		DEC2004		No		Yes	Yes		Ultrasound	No	07APR16	07APR2016			10	Entered	64	Female	27JUN16	176	MF4637	<250 mg/day	No	No	<250 mg/day	No	Yes	Yes	Yes	Yes
Visit 1	17	olecranon bursitis	musculoskeletal	N/A		10_009		JUL2011		2012		No		Yes	Yes		Ultrasound	No	07APR16	07APR2016			10	Entered	64	Female	27JUN16	176	MF4637	<250 mg/day	No	No	<250 mg/day	No	Yes	Yes	Yes	Yes
Visit 1	18	anxiety	psychological	Yes	Yes	10_009	29MAR16	29MAR2016				No		Yes	Yes		Ultrasound	No	07APR16	07APR2016			10	Entered	64	Female	27JUN16	176	MF4637	<250 mg/day	No	No	<250 mg/day	No	Yes	Yes	Yes	Yes
Visit 1	19	stress urinary incontinence	genital/urinary	Yes	Yes	10_009	15MAY06	15MAY2006				No		Yes	Yes		Ultrasound	No	07APR16	07APR2016			10	Entered	64	Female	27JUN16	176	MF4637	<250 mg/day	No	No	<250 mg/day	No	Yes	Yes	Yes	Yes
Visit 1	20	vaginal delivery	genital/urinary	N/A		10_009	07APR80	07APR1980	07APR80	07APR1980		No		Yes	Yes		Ultrasound	No	07APR16	07APR2016			10	Entered	64	Female	27JUN16	176	MF4637	<250 mg/day	No	No	<250 mg/day	No	Yes	Yes	Yes	Yes
Visit 1	21	uterine fibroid tumors	genital/urinary	N/A		10_009		1991		1991		No		Yes	Yes		Ultrasound	No	07APR16	07APR2016			10	Entered	64	Female	27JUN16	176	MF4637	<250 mg/day	No	No	<250 mg/day	No	Yes	Yes	Yes	Yes
Visit 1	22	Total abdominal hysterectomy	surgeries	N/A		10_009		1991		1991		No		Yes	Yes		Ultrasound	No	07APR16	07APR2016			10	Entered	64	Female	27JUN16	176	MF4637	<250 mg/day	No	No	<250 mg/day	No	Yes	Yes	Yes	Yes
Visit 1	23	bilateral salpingo-oophorectomy	surgeries	N/A		10_009		1991		1991		No		Yes	Yes		Ultrasound	No	07APR16	07APR2016			10	Entered	64	Female	27JUN16	176	MF4637	<250 mg/day	No	No	<250 mg/day	No	Yes	Yes	Yes	Yes
Visit 2						10_009							No										10	Entered	64	Female	27JUN16	176	MF4637	<250 mg/day	No	No	<250 mg/day	No	Yes	Yes	Yes	Yes
Visit 1	1	Elevated blood pressure	cardiovascular	Yes	Yes	10_010	29OCT15	29OCT2015				No		Yes	Yes		Ultrasound	No	23AUG16	23AUG2016			10	Entered	34	Male	27SEP16	175	Placebo	>=250 mg/day	No	No	>=250 mg/day	No	Yes	Yes	Yes	Yes
Visit 1	2	hyperlipidemia	cardiovascular	Yes	Yes	10_010	05NOV15	05NOV2015				No		Yes	Yes		Ultrasound	No	23AUG16	23AUG2016			10	Entered	34	Male	27SEP16	175	Placebo	>=250 mg/day	No	No	>=250 mg/day	No	Yes	Yes	Yes	Yes
Visit 1	3	elevated liver enzymes	liver	Yes	Yes	10_010	05NOV15	05NOV2015				No		Yes	Yes		Ultrasound	No	23AUG16	23AUG2016			10	Entered	34	Male	27SEP16	175	Placebo	>=250 mg/day	No	No	>=250 mg/day	No	Yes	Yes	Yes	Yes
Visit 1	4	Gout	musculoskeletal	Yes	Yes	10_010		2010				No		Yes	Yes		Ultrasound	No	23AUG16	23AUG2016			10	Entered	34	Male	27SEP16	175	Placebo	>=250 mg/day	No	No	>=250 mg/day	No	Yes	Yes	Yes	Yes
Visit 1	5	Left upper quadrant pain	gastrointestinal	Yes	Yes	10_010	16AUG16	16AUG2016				No		Yes	Yes		Ultrasound	No	23AUG16	23AUG2016			10	Entered	34	Male	27SEP16	175	Placebo	>=250 mg/day	No	No	>=250 mg/day	No	Yes	Yes	Yes	Yes
Visit 2	1	Elevated blood pressure	cardiovascular	Yes	Yes	10_010	29OCT15	29OCT2015					Yes										10	Entered	34	Male	27SEP16	175	Placebo	>=250 mg/day	No	No	>=250 mg/day	No	Yes	Yes	Yes	Yes
Visit 2	2	hyperlipidemia	cardiovascular	Yes	Yes	10_010	05NOV15	05NOV2015					Yes										10	Entered	34	Male	27SEP16	175	Placebo	>=250 mg/day	No	No	>=250 mg/day	No	Yes	Yes	Yes	Yes
Visit 2	3	elevated liver enzymes	liver	Yes	Yes	10_010	05NOV15	05NOV2015					Yes										10	Entered	34	Male	27SEP16	175	Placebo	>=250 mg/day	No	No	>=250 mg/day	No	Yes	Yes	Yes	Yes
Visit 2	4	Gout	musculoskeletal	Yes	Yes	10_010		2010					Yes										10	Entered	34	Male	27SEP16	175	Placebo	>=250 mg/day	No	No	>=250 mg/day	No	Yes	Yes	Yes	Yes
Visit 2	5	Left upper quadrant pain	gastrointestinal	Yes	Yes	10_010	16AUG16	16AUG2016					Yes										10	Entered	34	Male	27SEP16	175	Placebo	>=250 mg/day	No	No	>=250 mg/day	No	Yes	Yes	Yes	Yes
Visit 1	1	upper respiratory infection	eyes, ears, nose, throat	N/A		10_012	17DEC15	17DEC2015		DEC2015		No		Yes	Yes		Ultrasound	No	22SEP16	22SEP2016			10	Entered	53	Male	12OCT16	177	Placebo	<250 mg/day	No	Yes	<250 mg/day	No	Yes	Yes	Yes	Yes
Visit 1	2	allergic rhinitis	eyes, ears, nose, throat	Yes	Yes	10_012		1976				No		Yes	Yes		Ultrasound	No	22SEP16	22SEP2016			10	Entered	53	Male	12OCT16	177	Placebo	<250 mg/day	No	Yes	<250 mg/day	No	Yes	Yes	Yes	Yes
Visit 1	3	Lasik surgery both eyes	surgeries	N/A		10_012		JUN2016		JUN2016		No		Yes	Yes		Ultrasound	No	22SEP16	22SEP2016			10	Entered	53	Male	12OCT16	177	Placebo	<250 mg/day	No	Yes	<250 mg/day	No	Yes	Yes	Yes	Yes
Visit 1	4	dry skin	dermatological	Yes	Yes	10_012		2000				No		Yes	Yes		Ultrasound	No	22SEP16	22SEP2016			10	Entered	53	Male	12OCT16	177	Placebo	<250 mg/day	No	Yes	<250 mg/day	No	Yes	Yes	Yes	Yes
Visit 1	5	migraine headaches	neurological	Yes	Yes	10_012		2006				No		Yes	Yes		Ultrasound	No	22SEP16	22SEP2016			10	Entered	53	Male	12OCT16	177	Placebo	<250 mg/day	No	Yes	<250 mg/day	No	Yes	Yes	Yes	Yes
Visit 1	6	insomnia	neurological	Yes	Yes	10_012		2006				No		Yes	Yes		Ultrasound	No	22SEP16	22SEP2016			10	Entered	53	Male	12OCT16	177	Placebo	<250 mg/day	No	Yes	<250 mg/day	No	Yes	Yes	Yes	Yes
Visit 1	7	shortness of breatqh	cardiovascular	N/A		10_012	13SEP16	13SEP2016	13SEP16	13SEP2016		No		Yes	Yes		Ultrasound	No	22SEP16	22SEP2016			10	Entered	53	Male	12OCT16	177	Placebo	<250 mg/day	No	Yes	<250 mg/day	No	Yes	Yes	Yes	Yes
Visit 1	8	elevated blood pressure	cardiovascular	Yes	Yes	10_012		2015				No		Yes	Yes		Ultrasound	No	22SEP16	22SEP2016			10	Entered	53	Male	12OCT16	177	Placebo	<250 mg/day	No	Yes	<250 mg/day	No	Yes	Yes	Yes	Yes
Visit 1	9	hypertension	cardiovascular	Yes	Yes	10_012	22AUG16	22AUG2016				No		Yes	Yes		Ultrasound	No	22SEP16	22SEP2016			10	Entered	53	Male	12OCT16	177	Placebo	<250 mg/day	No	Yes	<250 mg/day	No	Yes	Yes	Yes	Yes
Visit 1	10	dyslipidemia	cardiovascular	Yes	Yes	10_012		2006				No		Yes	Yes		Ultrasound	No	22SEP16	22SEP2016			10	Entered	53	Male	12OCT16	177	Placebo	<250 mg/day	No	Yes	<250 mg/day	No	Yes	Yes	Yes	Yes
Visit 1	11	intermittent bilateral knee pain	musculoskeletal	Yes	Yes	10_012	22AUG16	22AUG2016				No		Yes	Yes		Ultrasound	No	22SEP16	22SEP2016			10	Entered	53	Male	12OCT16	177	Placebo	<250 mg/day	No	Yes	<250 mg/day	No	Yes	Yes	Yes	Yes
Visit 1	12	gastroesophageal reflux disease	gastrointestinal	Yes	Yes	10_012	22AUG16	22AUG2016				No		Yes	Yes		Ultrasound	No	22SEP16	22SEP2016			10	Entered	53	Male	12OCT16	177	Placebo	<250 mg/day	No	Yes	<250 mg/day	No	Yes	Yes	Yes	Yes
Visit 1	13	constipation	gastrointestinal	Yes	Yes	10_012		2006				No		Yes	Yes		Ultrasound	No	22SEP16	22SEP2016			10	Entered	53	Male	12OCT16	177	Placebo	<250 mg/day	No	Yes	<250 mg/day	No	Yes	Yes	Yes	Yes
Visit 1	14	erectile dysfunction	genital/urinary	Yes	Yes	10_012	17DEC15	17DEC2015				No		Yes	Yes		Ultrasound	No	22SEP16	22SEP2016			10	Entered	53	Male	12OCT16	177	Placebo	<250 mg/day	No	Yes	<250 mg/day	No	Yes	Yes	Yes	Yes
Visit 1	15	testosterone deficiency	genital/urinary	Yes	Yes	10_012	17DEC15	17DEC2015				No		Yes	Yes		Ultrasound	No	22SEP16	22SEP2016			10	Entered	53	Male	12OCT16	177	Placebo	<250 mg/day	No	Yes	<250 mg/day	No	Yes	Yes	Yes	Yes
Visit 1	16	genital herpes	genital/urinary	Yes	Yes	10_012		2006				No		Yes	Yes		Ultrasound	No	22SEP16	22SEP2016			10	Entered	53	Male	12OCT16	177	Placebo	<250 mg/day	No	Yes	<250 mg/day	No	Yes	Yes	Yes	Yes
Visit 1	17	squamous cell skin cancer right shin	cancer	N/A		10_012		2013		2013		No		Yes	Yes		Ultrasound	No	22SEP16	22SEP2016			10	Entered	53	Male	12OCT16	177	Placebo	<250 mg/day	No	Yes	<250 mg/day	No	Yes	Yes	Yes	Yes
Visit 1	18	lipomas bilateral forearms	dermatological	N/A		10_012		1977		1977		No		Yes	Yes		Ultrasound	No	22SEP16	22SEP2016			10	Entered	53	Male	12OCT16	177	Placebo	<250 mg/day	No	Yes	<250 mg/day	No	Yes	Yes	Yes	Yes
Visit 1	19	Lipoma removal bilateral forearms	dermatological	N/A		10_012		1977		1977		No		Yes	Yes		Ultrasound	No	22SEP16	22SEP2016			10	Entered	53	Male	12OCT16	177	Placebo	<250 mg/day	No	Yes	<250 mg/day	No	Yes	Yes	Yes	Yes
Visit 1	20	hyperglycemia	endocrine	Yes	Yes	10_012	29SEP16	29SEP2016				No		Yes	Yes		Ultrasound	No	22SEP16	22SEP2016			10	Entered	53	Male	12OCT16	177	Placebo	<250 mg/day	No	Yes	<250 mg/day	No	Yes	Yes	Yes	Yes
Visit 2	1	upper respiratory infection	eyes, ears, nose, throat	N/A		10_012	17DEC15	17DEC2015		DEC2015			Yes										10	Entered	53	Male	12OCT16	177	Placebo	<250 mg/day	No	Yes	<250 mg/day	No	Yes	Yes	Yes	Yes
Visit 2	2	allergic rhinitis	eyes, ears, nose, throat	Yes	Yes	10_012		1976					Yes										10	Entered	53	Male	12OCT16	177	Placebo	<250 mg/day	No	Yes	<250 mg/day	No	Yes	Yes	Yes	Yes
Visit 2	3	Lasik surgery both eyes	surgeries	N/A		10_012		JUN2016		JUN2016			Yes										10	Entered	53	Male	12OCT16	177	Placebo	<250 mg/day	No	Yes	<250 mg/day	No	Yes	Yes	Yes	Yes
Visit 2	4	dry skin	dermatological	Yes	Yes	10_012		2000					Yes										10	Entered	53	Male	12OCT16	177	Placebo	<250 mg/day	No	Yes	<250 mg/day	No	Yes	Yes	Yes	Yes
Visit 2	5	migraine headaches	neurological	Yes	Yes	10_012		2006					Yes										10	Entered	53	Male	12OCT16	177	Placebo	<250 mg/day	No	Yes	<250 mg/day	No	Yes	Yes	Yes	Yes
Visit 2	6	insomnia	neurological	Yes	Yes	10_012		2006					Yes										10	Entered	53	Male	12OCT16	177	Placebo	<250 mg/day	No	Yes	<250 mg/day	No	Yes	Yes	Yes	Yes
Visit 2	7	shortness of breatqh	cardiovascular	N/A		10_012	13SEP16	13SEP2016	13SEP16	13SEP2016			Yes										10	Entered	53	Male	12OCT16	177	Placebo	<250 mg/day	No	Yes	<250 mg/day	No	Yes	Yes	Yes	Yes
Visit 2	8	elevated blood pressure	cardiovascular	Yes	Yes	10_012		2015					Yes										10	Entered	53	Male	12OCT16	177	Placebo	<250 mg/day	No	Yes	<250 mg/day	No	Yes	Yes	Yes	Yes
Visit 2	9	hypertension	cardiovascular	Yes	Yes	10_012	22AUG16	22AUG2016					Yes										10	Entered	53	Male	12OCT16	177	Placebo	<250 mg/day	No	Yes	<250 mg/day	No	Yes	Yes	Yes	Yes
Visit 2	10	dyslipidemia	cardiovascular	Yes	Yes	10_012		2006					Yes										10	Entered	53	Male	12OCT16	177	Placebo	<250 mg/day	No	Yes	<250 mg/day	No	Yes	Yes	Yes	Yes
Visit 2	11	intermittent bilateral knee pain	musculoskeletal	Yes	Yes	10_012	22AUG16	22AUG2016					Yes										10	Entered	53	Male	12OCT16	177	Placebo	<250 mg/day	No	Yes	<250 mg/day	No	Yes	Yes	Yes	Yes
Visit 2	12	gastroesophageal reflux disease	gastrointestinal	Yes	Yes	10_012	22AUG16	22AUG2016					Yes										10	Entered	53	Male	12OCT16	177	Placebo	<250 mg/day	No	Yes	<250 mg/day	No	Yes	Yes	Yes	Yes
Visit 2	13	constipation	gastrointestinal	Yes	Yes	10_012		2006					Yes										10	Entered	53	Male	12OCT16	177	Placebo	<250 mg/day	No	Yes	<250 mg/day	No	Yes	Yes	Yes	Yes
Visit 2	14	erectile dysfunction	genital/urinary	Yes	Yes	10_012	17DEC15	17DEC2015					Yes										10	Entered	53	Male	12OCT16	177	Placebo	<250 mg/day	No	Yes	<250 mg/day	No	Yes	Yes	Yes	Yes
Visit 2	15	testosterone deficiency	genital/urinary	Yes	Yes	10_012	17DEC15	17DEC2015					Yes										10	Entered	53	Male	12OCT16	177	Placebo	<250 mg/day	No	Yes	<250 mg/day	No	Yes	Yes	Yes	Yes
Visit 2	16	genital herpes	genital/urinary	Yes	Yes	10_012		2006					Yes										10	Entered	53	Male	12OCT16	177	Placebo	<250 mg/day	No	Yes	<250 mg/day	No	Yes	Yes	Yes	Yes
Visit 2	17	squamous cell skin cancer right shin	cancer	N/A		10_012		2013		2013			Yes										10	Entered	53	Male	12OCT16	177	Placebo	<250 mg/day	No	Yes	<250 mg/day	No	Yes	Yes	Yes	Yes
Visit 2	18	lipomas bilateral forearms	dermatological	N/A		10_012		1977		1977			Yes										10	Entered	53	Male	12OCT16	177	Placebo	<250 mg/day	No	Yes	<250 mg/day	No	Yes	Yes	Yes	Yes
Visit 2	19	Lipoma removal bilateral forearms	dermatological	N/A		10_012		1977		1977			Yes										10	Entered	53	Male	12OCT16	177	Placebo	<250 mg/day	No	Yes	<250 mg/day	No	Yes	Yes	Yes	Yes
Visit 2	20	hyperglycemia	endocrine	Yes	Yes	10_012	29SEP16	29SEP2016					Yes										10	Entered	53	Male	12OCT16	177	Placebo	<250 mg/day	No	Yes	<250 mg/day	No	Yes	Yes	Yes	Yes
Visit 1	1	PSORIARIS	dermatological	Yes	Yes	11_003		1990				Yes		Yes	Yes		Ultrasound	No	09JUL16	09JUL2016			11	Early Termination	52	Male	15SEP16	142	Placebo	<250 mg/day	Yes	Yes	>=250 mg/day	No	Yes	Yes	Yes	Yes
Visit 1	2	DIVERTICULITIS	gastrointestinal	Yes		11_003		07UNK2016		07UNK2016		Yes		Yes	Yes		Ultrasound	No	09JUL16	09JUL2016			11	Early Termination	52	Male	15SEP16	142	Placebo	<250 mg/day	Yes	Yes	>=250 mg/day	No	Yes	Yes	Yes	Yes
Visit 1	3	CHOLELITHIASIS	gastrointestinal	N/A		11_003		04UNK2015		04UNK2015		Yes		Yes	Yes		Ultrasound	No	09JUL16	09JUL2016			11	Early Termination	52	Male	15SEP16	142	Placebo	<250 mg/day	Yes	Yes	>=250 mg/day	No	Yes	Yes	Yes	Yes
Visit 1	4	CHOLECYSTECTOMY	gastrointestinal	N/A		11_003		04UNK2015		04UNK2015		Yes		Yes	Yes		Ultrasound	No	09JUL16	09JUL2016			11	Early Termination	52	Male	15SEP16	142	Placebo	<250 mg/day	Yes	Yes	>=250 mg/day	No	Yes	Yes	Yes	Yes
Visit 1	5	DIABETES MELLITUS TYPE II	endocrine	Yes	Yes	11_003		2014				Yes		Yes	Yes		Ultrasound	No	09JUL16	09JUL2016			11	Early Termination	52	Male	15SEP16	142	Placebo	<250 mg/day	Yes	Yes	>=250 mg/day	No	Yes	Yes	Yes	Yes
Visit 1	6	HYPERLIPIDEMIA	endocrine	Yes	Yes	11_003		2015				Yes		Yes	Yes		Ultrasound	No	09JUL16	09JUL2016			11	Early Termination	52	Male	15SEP16	142	Placebo	<250 mg/day	Yes	Yes	>=250 mg/day	No	Yes	Yes	Yes	Yes
Visit 1	7	INSOMNIA	psychological	Yes	Yes	11_003		2011				Yes		Yes	Yes		Ultrasound	No	09JUL16	09JUL2016			11	Early Termination	52	Male	15SEP16	142	Placebo	<250 mg/day	Yes	Yes	>=250 mg/day	No	Yes	Yes	Yes	Yes
Visit 2						11_003							No										11	Early Termination	52	Male	15SEP16	142	Placebo	<250 mg/day	Yes	Yes	>=250 mg/day	No	Yes	Yes	Yes	Yes
Visit 1	1	SEASONAL ALLERGIES	allergies	Yes	Yes	11_004		2005				Yes		Yes	Yes		Ultrasound	No	25JUL16	25JUL2016			11	Entered	42	Female	02SEP16	140	MF4637	<250 mg/day	Yes	No	<250 mg/day	No	Yes	Yes	Yes	Yes
Visit 1	2	TRANSIENT GASTRIC ULCER	gastrointestinal	Yes	Yes	11_004		2001				Yes		Yes	Yes		Ultrasound	No	25JUL16	25JUL2016			11	Entered	42	Female	02SEP16	140	MF4637	<250 mg/day	Yes	No	<250 mg/day	No	Yes	Yes	Yes	Yes
Visit 1	3	HEARTBURN	gastrointestinal	Yes	Yes	11_004		2001				Yes		Yes	Yes		Ultrasound	No	25JUL16	25JUL2016			11	Entered	42	Female	02SEP16	140	MF4637	<250 mg/day	Yes	No	<250 mg/day	No	Yes	Yes	Yes	Yes
Visit 1	4	TUBAL LIGATION	genital/urinary	N/A		11_004		NOV2007		NOV2007		Yes		Yes	Yes		Ultrasound	No	25JUL16	25JUL2016			11	Entered	42	Female	02SEP16	140	MF4637	<250 mg/day	Yes	No	<250 mg/day	No	Yes	Yes	Yes	Yes
Visit 1	5	VITAMIN D DEFICIENCY	blood/bleeding disorders	Yes	Yes	11_004		2008				Yes		Yes	Yes		Ultrasound	No	25JUL16	25JUL2016			11	Entered	42	Female	02SEP16	140	MF4637	<250 mg/day	Yes	No	<250 mg/day	No	Yes	Yes	Yes	Yes
Visit 1	6	FATTY LIVER	liver	No	Yes	11_004		JAN2016				Yes		Yes	Yes		Ultrasound	No	25JUL16	25JUL2016			11	Entered	42	Female	02SEP16	140	MF4637	<250 mg/day	Yes	No	<250 mg/day	No	Yes	Yes	Yes	Yes
Visit 1	7	DIABETES MELLITUS II	endocrine	Yes	Yes	11_004		MAY2001				Yes		Yes	Yes		Ultrasound	No	25JUL16	25JUL2016			11	Entered	42	Female	02SEP16	140	MF4637	<250 mg/day	Yes	No	<250 mg/day	No	Yes	Yes	Yes	Yes
Visit 1	8	NEARSIGHTEDNESS	eyes, ears, nose, throat	N/A	Yes	11_004		1998				Yes		Yes	Yes		Ultrasound	No	25JUL16	25JUL2016			11	Entered	42	Female	02SEP16	140	MF4637	<250 mg/day	Yes	No	<250 mg/day	No	Yes	Yes	Yes	Yes
Visit 2	1	SEASONAL ALLERGIES	allergies	Yes	Yes	11_004		2005					No										11	Entered	42	Female	02SEP16	140	MF4637	<250 mg/day	Yes	No	<250 mg/day	No	Yes	Yes	Yes	Yes
Visit 2	2	TRANSIENT GASTRIC ULCER	gastrointestinal	Yes	Yes	11_004		2001					No										11	Entered	42	Female	02SEP16	140	MF4637	<250 mg/day	Yes	No	<250 mg/day	No	Yes	Yes	Yes	Yes
Visit 2	3	HEARTBURN	gastrointestinal	Yes	Yes	11_004		2001					No										11	Entered	42	Female	02SEP16	140	MF4637	<250 mg/day	Yes	No	<250 mg/day	No	Yes	Yes	Yes	Yes
Visit 2	4	TUBAL LIGATION	genital/urinary	N/A		11_004		NOV2007		NOV2007			No										11	Entered	42	Female	02SEP16	140	MF4637	<250 mg/day	Yes	No	<250 mg/day	No	Yes	Yes	Yes	Yes
Visit 2	5	VITAMIN D DEFICIENCY	blood/bleeding disorders	Yes	Yes	11_004		2008					No										11	Entered	42	Female	02SEP16	140	MF4637	<250 mg/day	Yes	No	<250 mg/day	No	Yes	Yes	Yes	Yes
Visit 2	6	FATTY LIVER	liver	No	Yes	11_004		JAN2016					No										11	Entered	42	Female	02SEP16	140	MF4637	<250 mg/day	Yes	No	<250 mg/day	No	Yes	Yes	Yes	Yes
Visit 2	7	DIABETES MELLITUS II	endocrine	Yes	Yes	11_004		MAY2001					No										11	Entered	42	Female	02SEP16	140	MF4637	<250 mg/day	Yes	No	<250 mg/day	No	Yes	Yes	Yes	Yes
Visit 2	8	NEARSIGHTEDNESS	eyes, ears, nose, throat	N/A	Yes	11_004		1998					No										11	Entered	42	Female	02SEP16	140	MF4637	<250 mg/day	Yes	No	<250 mg/day	No	Yes	Yes	Yes	Yes
Visit 1	1	POLLEN (PALM)	allergies	Yes	Yes	11_005		2014				Yes		Yes	Yes		Ultrasound	No		AUG2016			11	Early Termination	63	Male	26SEP16	141	MF4637	>=250 mg/day	No	No	>=250 mg/day	No	Yes	Yes	No	No
Visit 1	2	HYPERLIPIDEMIA	endocrine	Yes	Yes	11_005		2016				Yes		Yes	Yes		Ultrasound	No		AUG2016			11	Early Termination	63	Male	26SEP16	141	MF4637	>=250 mg/day	No	No	>=250 mg/day	No	Yes	Yes	No	No
Visit 1	3	HYPERTENSION	cardiovascular	Yes	Yes	11_005		2015				Yes		Yes	Yes		Ultrasound	No		AUG2016			11	Early Termination	63	Male	26SEP16	141	MF4637	>=250 mg/day	No	No	>=250 mg/day	No	Yes	Yes	No	No
Visit 1	4	PRE-DIABETIC	endocrine	Yes	Yes	11_005		2016				Yes		Yes	Yes		Ultrasound	No		AUG2016			11	Early Termination	63	Male	26SEP16	141	MF4637	>=250 mg/day	No	No	>=250 mg/day	No	Yes	Yes	No	No
Visit 1	5	PRESBYOPIA	eyes, ears, nose, throat	Yes	Yes	11_005		2011				Yes		Yes	Yes		Ultrasound	No		AUG2016			11	Early Termination	63	Male	26SEP16	141	MF4637	>=250 mg/day	No	No	>=250 mg/day	No	Yes	Yes	No	No
Visit 1	6	RIGHT HIP REPLACEMENT	surgeries	N/A		11_005		2015		2015		Yes		Yes	Yes		Ultrasound	No		AUG2016			11	Early Termination	63	Male	26SEP16	141	MF4637	>=250 mg/day	No	No	>=250 mg/day	No	Yes	Yes	No	No
Visit 1	7	LEFT HIP REPLACEMENT	surgeries	N/A		11_005		2009		2009		Yes		Yes	Yes		Ultrasound	No		AUG2016			11	Early Termination	63	Male	26SEP16	141	MF4637	>=250 mg/day	No	No	>=250 mg/day	No	Yes	Yes	No	No
Visit 1	8	RIGHT KNEE	surgeries	N/A		11_005		1975		1975		Yes		Yes	Yes		Ultrasound	No		AUG2016			11	Early Termination	63	Male	26SEP16	141	MF4637	>=250 mg/day	No	No	>=250 mg/day	No	Yes	Yes	No	No
Visit 1	9	RIGHT KNEE	surgeries	N/A		11_005		1978		1978		Yes		Yes	Yes		Ultrasound	No		AUG2016			11	Early Termination	63	Male	26SEP16	141	MF4637	>=250 mg/day	No	No	>=250 mg/day	No	Yes	Yes	No	No
Visit 1	10	HERNIATED DISC	musculoskeletal	Yes	Yes	11_005		2001				Yes		Yes	Yes		Ultrasound	No		AUG2016			11	Early Termination	63	Male	26SEP16	141	MF4637	>=250 mg/day	No	No	>=250 mg/day	No	Yes	Yes	No	No
Visit 1	11	BACK	surgeries	N/A		11_005		2001		2001		Yes		Yes	Yes		Ultrasound	No		AUG2016			11	Early Termination	63	Male	26SEP16	141	MF4637	>=250 mg/day	No	No	>=250 mg/day	No	Yes	Yes	No	No
Visit 1	12	SCIATICA	surgeries	Yes	Yes	11_005		2001				Yes		Yes	Yes		Ultrasound	No		AUG2016			11	Early Termination	63	Male	26SEP16	141	MF4637	>=250 mg/day	No	No	>=250 mg/day	No	Yes	Yes	No	No
Visit 2						11_005							No										11	Early Termination	63	Male	26SEP16	141	MF4637	>=250 mg/day	No	No	>=250 mg/day	No	Yes	Yes	No	No
Visit 1	1	SINUSITIS	eyes, ears, nose, throat	Yes		11_006		2005		2015		Yes		Yes	No	Yes		No			14SEP16	14SEP2016	11	Entered	54	Female	29SEP16	146	Placebo	<250 mg/day	Yes	No	>=250 mg/day	No	Yes	Yes	Yes	Yes
Visit 1	2	SINUS SURGERY	eyes, ears, nose, throat	N/A		11_006		2015		2015		Yes		Yes	No	Yes		No			14SEP16	14SEP2016	11	Entered	54	Female	29SEP16	146	Placebo	<250 mg/day	Yes	No	>=250 mg/day	No	Yes	Yes	Yes	Yes
Visit 1	3	GERD	gastrointestinal	Yes	Yes	11_006		2013				Yes		Yes	No	Yes		No			14SEP16	14SEP2016	11	Entered	54	Female	29SEP16	146	Placebo	<250 mg/day	Yes	No	>=250 mg/day	No	Yes	Yes	Yes	Yes
Visit 1	4	HEARTBURN	gastrointestinal	Yes	Yes	11_006		2013				Yes		Yes	No	Yes		No			14SEP16	14SEP2016	11	Entered	54	Female	29SEP16	146	Placebo	<250 mg/day	Yes	No	>=250 mg/day	No	Yes	Yes	Yes	Yes
Visit 1	5	HEMORRHOIDS	gastrointestinal	Yes	Yes	11_006		2005				Yes		Yes	No	Yes		No			14SEP16	14SEP2016	11	Entered	54	Female	29SEP16	146	Placebo	<250 mg/day	Yes	No	>=250 mg/day	No	Yes	Yes	Yes	Yes
Visit 1	6	MENOPAUSE	genital/urinary	N/A	Yes	11_006		2008				Yes		Yes	No	Yes		No			14SEP16	14SEP2016	11	Entered	54	Female	29SEP16	146	Placebo	<250 mg/day	Yes	No	>=250 mg/day	No	Yes	Yes	Yes	Yes
Visit 1	7	DIABETES MELLITUS TYPE II	endocrine	Yes	Yes	11_006		2014				Yes		Yes	No	Yes		No			14SEP16	14SEP2016	11	Entered	54	Female	29SEP16	146	Placebo	<250 mg/day	Yes	No	>=250 mg/day	No	Yes	Yes	Yes	Yes
Visit 1	8	HYPERLIPIDEMIA	endocrine	Yes	Yes	11_006		2015				Yes		Yes	No	Yes		No			14SEP16	14SEP2016	11	Entered	54	Female	29SEP16	146	Placebo	<250 mg/day	Yes	No	>=250 mg/day	No	Yes	Yes	Yes	Yes
Visit 1	9	ANXIETY DISORDER	psychological	Yes	Yes	11_006		2013				Yes		Yes	No	Yes		No			14SEP16	14SEP2016	11	Entered	54	Female	29SEP16	146	Placebo	<250 mg/day	Yes	No	>=250 mg/day	No	Yes	Yes	Yes	Yes
Visit 2						11_006							No										11	Entered	54	Female	29SEP16	146	Placebo	<250 mg/day	Yes	No	>=250 mg/day	No	Yes	Yes	Yes	Yes
Visit 1	1	ALLERGIC TO ERYTHROMICIN	allergies	Yes	Yes	11_007		1986				No		Yes	Yes		Ultrasound	No	13JUL16	13JUL2016			11	Screen Failure	48	Female							>=250 mg/day	Yes	No	No	No	No
Visit 1	2	CONSTIPATION	gastrointestinal	Yes	Yes	11_007		1980				No		Yes	Yes		Ultrasound	No	13JUL16	13JUL2016			11	Screen Failure	48	Female							>=250 mg/day	Yes	No	No	No	No
Visit 1	3	C-SECTION	surgeries	N/A		11_007	03FEB91	03FEB1991	03FEB91	03FEB1991		No		Yes	Yes		Ultrasound	No	13JUL16	13JUL2016			11	Screen Failure	48	Female							>=250 mg/day	Yes	No	No	No	No
Visit 1	4	BILATERAL TUBAL LIGATION	surgeries	N/A	No	11_007		1995				No		Yes	Yes		Ultrasound	No	13JUL16	13JUL2016			11	Screen Failure	48	Female							>=250 mg/day	Yes	No	No	No	No
Visit 1	5	NAFLD	liver	Yes	Yes	11_007	13JUL16	13JUL2016				No		Yes	Yes		Ultrasound	No	13JUL16	13JUL2016			11	Screen Failure	48	Female							>=250 mg/day	Yes	No	No	No	No
Visit 1	6	RIGHT FOOT SPURS	musculoskeletal	Yes		11_007		1984		1984		No		Yes	Yes		Ultrasound	No	13JUL16	13JUL2016			11	Screen Failure	48	Female							>=250 mg/day	Yes	No	No	No	No
Visit 1	7	RIGHT FOOT SPURS SURGERY	surgeries	N/A		11_007		1984		1984		No		Yes	Yes		Ultrasound	No	13JUL16	13JUL2016			11	Screen Failure	48	Female							>=250 mg/day	Yes	No	No	No	No
Visit 1	8	MENOPAUSE	endocrine	Yes	Yes	11_007		SEP2015				No		Yes	Yes		Ultrasound	No	13JUL16	13JUL2016			11	Screen Failure	48	Female							>=250 mg/day	Yes	No	No	No	No
Visit 1	1	VERTIGO	eyes, ears, nose, throat	Yes	Yes	11_008	07SEP16	07SEP2016				No		Yes	Yes		Ultrasound	No	21SEP15	21SEP2015			11	Entered	42	Male	27SEP16	144	MF4637	<250 mg/day	No	No	>=250 mg/day	No	Yes	Yes	Yes	Yes
Visit 1	2	NAFLD	liver	Yes	Yes	11_008	21SEP15	21SEP2015				No		Yes	Yes		Ultrasound	No	21SEP15	21SEP2015			11	Entered	42	Male	27SEP16	144	MF4637	<250 mg/day	No	No	>=250 mg/day	No	Yes	Yes	Yes	Yes
Visit 1	3	RIGHT KNEE CYST	musculoskeletal	N/A		11_008		1983		1983		No		Yes	Yes		Ultrasound	No	21SEP15	21SEP2015			11	Entered	42	Male	27SEP16	144	MF4637	<250 mg/day	No	No	>=250 mg/day	No	Yes	Yes	Yes	Yes
Visit 1	4	RIGHT KNEE CYST SURGERY	surgeries	N/A		11_008		1983		1983		No		Yes	Yes		Ultrasound	No	21SEP15	21SEP2015			11	Entered	42	Male	27SEP16	144	MF4637	<250 mg/day	No	No	>=250 mg/day	No	Yes	Yes	Yes	Yes
Visit 2						11_008							No										11	Entered	42	Male	27SEP16	144	MF4637	<250 mg/day	No	No	>=250 mg/day	No	Yes	Yes	Yes	Yes
Visit 1	1	GERD	gastrointestinal	Yes	Yes	11_009		2005				No		Yes	Yes		Ultrasound	No	28JUL16	28JUL2016			11	Entered	50	Female	01OCT16	147	Placebo	<250 mg/day	No	No	<250 mg/day	No	Yes	Yes	Yes	Yes
Visit 1	2	IBSC	gastrointestinal	Yes	Yes	11_009		2005				No		Yes	Yes		Ultrasound	No	28JUL16	28JUL2016			11	Entered	50	Female	01OCT16	147	Placebo	<250 mg/day	No	No	<250 mg/day	No	Yes	Yes	Yes	Yes
Visit 1	3	HYSTERECTOMY	surgeries	N/A		11_009		2006		2006		No		Yes	Yes		Ultrasound	No	28JUL16	28JUL2016			11	Entered	50	Female	01OCT16	147	Placebo	<250 mg/day	No	No	<250 mg/day	No	Yes	Yes	Yes	Yes
Visit 1	4	UTERUS FIBROIDS	genital/urinary	Yes		11_009		2001		2006		No		Yes	Yes		Ultrasound	No	28JUL16	28JUL2016			11	Entered	50	Female	01OCT16	147	Placebo	<250 mg/day	No	No	<250 mg/day	No	Yes	Yes	Yes	Yes
Visit 1	5	MYOMECTOMY	surgeries	N/A		11_009		2001		2001		No		Yes	Yes		Ultrasound	No	28JUL16	28JUL2016			11	Entered	50	Female	01OCT16	147	Placebo	<250 mg/day	No	No	<250 mg/day	No	Yes	Yes	Yes	Yes
Visit 1	6	OOPHORECTOMY	surgeries	N/A		11_009		2013		2013		No		Yes	Yes		Ultrasound	No	28JUL16	28JUL2016			11	Entered	50	Female	01OCT16	147	Placebo	<250 mg/day	No	No	<250 mg/day	No	Yes	Yes	Yes	Yes
Visit 1	7	CYST OVARY	genital/urinary	Yes		11_009		2013		2013		No		Yes	Yes		Ultrasound	No	28JUL16	28JUL2016			11	Entered	50	Female	01OCT16	147	Placebo	<250 mg/day	No	No	<250 mg/day	No	Yes	Yes	Yes	Yes
Visit 1	8	NAFLD	liver	Yes	Yes	11_009	28JUL16	28JUL2016				No		Yes	Yes		Ultrasound	No	28JUL16	28JUL2016			11	Entered	50	Female	01OCT16	147	Placebo	<250 mg/day	No	No	<250 mg/day	No	Yes	Yes	Yes	Yes
Visit 1	9	OBESITY	endocrine	Yes	Yes	11_009		1980				No		Yes	Yes		Ultrasound	No	28JUL16	28JUL2016			11	Entered	50	Female	01OCT16	147	Placebo	<250 mg/day	No	No	<250 mg/day	No	Yes	Yes	Yes	Yes
Visit 1	10	CHRONIC BACK PAIN	musculoskeletal	Yes	Yes	11_009		1980				No		Yes	Yes		Ultrasound	No	28JUL16	28JUL2016			11	Entered	50	Female	01OCT16	147	Placebo	<250 mg/day	No	No	<250 mg/day	No	Yes	Yes	Yes	Yes
Visit 2						11_009							No										11	Entered	50	Female	01OCT16	147	Placebo	<250 mg/day	No	No	<250 mg/day	No	Yes	Yes	Yes	Yes
Visit 1	1	TACHYCARDIA	cardiovascular	Yes	Yes	11_010		1976				No		Yes	Yes		Ultrasound	No	03MAR16	03MAR2016			11	Entered	52	Female	27SEP16	143	Placebo	<250 mg/day	No	Yes	<250 mg/day	No	Yes	Yes	Yes	Yes
Visit 1	2	C-SECTION	surgeries	N/A		11_010	24FEB05	24FEB2005	24FEB05	24FEB2005		No		Yes	Yes		Ultrasound	No	03MAR16	03MAR2016			11	Entered	52	Female	27SEP16	143	Placebo	<250 mg/day	No	Yes	<250 mg/day	No	Yes	Yes	Yes	Yes
Visit 1	3	HYPOTHIROIDISM	endocrine	Yes	Yes	11_010		2000				No		Yes	Yes		Ultrasound	No	03MAR16	03MAR2016			11	Entered	52	Female	27SEP16	143	Placebo	<250 mg/day	No	Yes	<250 mg/day	No	Yes	Yes	Yes	Yes
Visit 1	4	HYPERLIPIDEMIA	endocrine	Yes	Yes	11_010		2001				No		Yes	Yes		Ultrasound	No	03MAR16	03MAR2016			11	Entered	52	Female	27SEP16	143	Placebo	<250 mg/day	No	Yes	<250 mg/day	No	Yes	Yes	Yes	Yes
Visit 1	5	MIGRAINES	neurological	Yes	Yes	11_010		2013				No		Yes	Yes		Ultrasound	No	03MAR16	03MAR2016			11	Entered	52	Female	27SEP16	143	Placebo	<250 mg/day	No	Yes	<250 mg/day	No	Yes	Yes	Yes	Yes
Visit 1	6	MAJOR DEPRESSION DISORDER	psychological	Yes	Yes	11_010		2002				No		Yes	Yes		Ultrasound	No	03MAR16	03MAR2016			11	Entered	52	Female	27SEP16	143	Placebo	<250 mg/day	No	Yes	<250 mg/day	No	Yes	Yes	Yes	Yes
Visit 1	7	SLEEP DISORDER	psychological	Yes	Yes	11_010		2015				No		Yes	Yes		Ultrasound	No	03MAR16	03MAR2016			11	Entered	52	Female	27SEP16	143	Placebo	<250 mg/day	No	Yes	<250 mg/day	No	Yes	Yes	Yes	Yes
Visit 2						11_010							No										11	Entered	52	Female	27SEP16	143	Placebo	<250 mg/day	No	Yes	<250 mg/day	No	Yes	Yes	Yes	Yes
Visit 1	1	IBS	gastrointestinal	Yes	Yes	11_011		2002				No		Yes	No	Yes		No			28SEP16	28SEP2016	11	Entered	41	Female	19OCT16	244	Placebo	<250 mg/day	No	No	>=250 mg/day	No	Yes	Yes	Yes	Yes
Visit 1	2	ECTOPIC PREGNANCY	genital/urinary	N/A		11_011		1998		1998		No		Yes	No	Yes		No			28SEP16	28SEP2016	11	Entered	41	Female	19OCT16	244	Placebo	<250 mg/day	No	No	>=250 mg/day	No	Yes	Yes	Yes	Yes
Visit 1	3	LEFT FALOPIAN TUBE REMOVAL	surgeries	N/A		11_011		1998		1998		No		Yes	No	Yes		No			28SEP16	28SEP2016	11	Entered	41	Female	19OCT16	244	Placebo	<250 mg/day	No	No	>=250 mg/day	No	Yes	Yes	Yes	Yes
Visit 1	4	OVARIAN CYST	genital/urinary	N/A		11_011		1996		1996		No		Yes	No	Yes		No			28SEP16	28SEP2016	11	Entered	41	Female	19OCT16	244	Placebo	<250 mg/day	No	No	>=250 mg/day	No	Yes	Yes	Yes	Yes
Visit 1	5	OVARYAN CYST REMOVAL	surgeries	N/A		11_011		1996		1996		No		Yes	No	Yes		No			28SEP16	28SEP2016	11	Entered	41	Female	19OCT16	244	Placebo	<250 mg/day	No	No	>=250 mg/day	No	Yes	Yes	Yes	Yes
Visit 1	6	CHOLECISTITIS	gastrointestinal	N/A		11_011		2014		2014		No		Yes	No	Yes		No			28SEP16	28SEP2016	11	Entered	41	Female	19OCT16	244	Placebo	<250 mg/day	No	No	>=250 mg/day	No	Yes	Yes	Yes	Yes
Visit 1	7	CHOLECYSTECTOMY	gastrointestinal	N/A		11_011		2014		2014		No		Yes	No	Yes		No			28SEP16	28SEP2016	11	Entered	41	Female	19OCT16	244	Placebo	<250 mg/day	No	No	>=250 mg/day	No	Yes	Yes	Yes	Yes
Visit 1	8	HYPOTHIROIDISM	endocrine	Yes	Yes	11_011		2003				No		Yes	No	Yes		No			28SEP16	28SEP2016	11	Entered	41	Female	19OCT16	244	Placebo	<250 mg/day	No	No	>=250 mg/day	No	Yes	Yes	Yes	Yes
Visit 1	9	HYPERTRIGLICERIDEMIA	endocrine	Yes	Yes	11_011		2014				No		Yes	No	Yes		No			28SEP16	28SEP2016	11	Entered	41	Female	19OCT16	244	Placebo	<250 mg/day	No	No	>=250 mg/day	No	Yes	Yes	Yes	Yes
Visit 1	10	PENICILIM	allergies	Yes	Yes	11_011		1974				No		Yes	No	Yes		No			28SEP16	28SEP2016	11	Entered	41	Female	19OCT16	244	Placebo	<250 mg/day	No	No	>=250 mg/day	No	Yes	Yes	Yes	Yes
Visit 1	11	ANXIETY	psychological	Yes	Yes	11_011		2004				No		Yes	No	Yes		No			28SEP16	28SEP2016	11	Entered	41	Female	19OCT16	244	Placebo	<250 mg/day	No	No	>=250 mg/day	No	Yes	Yes	Yes	Yes
Visit 1	12	IMNSONIA	psychological	Yes	Yes	11_011		2004				No		Yes	No	Yes		No			28SEP16	28SEP2016	11	Entered	41	Female	19OCT16	244	Placebo	<250 mg/day	No	No	>=250 mg/day	No	Yes	Yes	Yes	Yes
Visit 1	13	RIGHT SHOULDER SURGERY	surgeries	N/A		11_011		2001		2001		No		Yes	No	Yes		No			28SEP16	28SEP2016	11	Entered	41	Female	19OCT16	244	Placebo	<250 mg/day	No	No	>=250 mg/day	No	Yes	Yes	Yes	Yes
Visit 1	14	RIGHT SHOULDER PARTIAL DISLOCATION	musculoskeletal	N/A		11_011		2001		2001		No		Yes	No	Yes		No			28SEP16	28SEP2016	11	Entered	41	Female	19OCT16	244	Placebo	<250 mg/day	No	No	>=250 mg/day	No	Yes	Yes	Yes	Yes
Visit 2						11_011							No										11	Entered	41	Female	19OCT16	244	Placebo	<250 mg/day	No	No	>=250 mg/day	No	Yes	Yes	Yes	Yes
Visit 1	1	Cholecystistis	gastrointestinal	Yes		11_012		2010		2010		No		Yes	No	Yes		No			28SEP16	28SEP2016	11	Entered	40	Female	18OCT16	145	MF4637	<250 mg/day	No	No	<250 mg/day	No	Yes	Yes	Yes	Yes
Visit 1	2	Cholecystectomy	surgeries	N/A		11_012		2010		2010		No		Yes	No	Yes		No			28SEP16	28SEP2016	11	Entered	40	Female	18OCT16	145	MF4637	<250 mg/day	No	No	<250 mg/day	No	Yes	Yes	Yes	Yes
Visit 1	3	C-section	surgeries	N/A		11_012	29NOV99	29NOV1999	29NOV99	29NOV1999		No		Yes	No	Yes		No			28SEP16	28SEP2016	11	Entered	40	Female	18OCT16	145	MF4637	<250 mg/day	No	No	<250 mg/day	No	Yes	Yes	Yes	Yes
Visit 1	4	c-section	surgeries	N/A		11_012	12APR02	12APR2002	12APR02	12APR2002		No		Yes	No	Yes		No			28SEP16	28SEP2016	11	Entered	40	Female	18OCT16	145	MF4637	<250 mg/day	No	No	<250 mg/day	No	Yes	Yes	Yes	Yes
Visit 1	5	Left knee surgery	surgeries	N/A		11_012		2006		2006		No		Yes	No	Yes		No			28SEP16	28SEP2016	11	Entered	40	Female	18OCT16	145	MF4637	<250 mg/day	No	No	<250 mg/day	No	Yes	Yes	Yes	Yes
Visit 1	6	Umbilical hernia	surgeries	N/A		11_012		2006		2006		No		Yes	No	Yes		No			28SEP16	28SEP2016	11	Entered	40	Female	18OCT16	145	MF4637	<250 mg/day	No	No	<250 mg/day	No	Yes	Yes	Yes	Yes
Visit 1	7	umbilical hernia	surgeries	N/A		11_012		2006		2006		No		Yes	No	Yes		No			28SEP16	28SEP2016	11	Entered	40	Female	18OCT16	145	MF4637	<250 mg/day	No	No	<250 mg/day	No	Yes	Yes	Yes	Yes
Visit 1	8	Gerd	gastrointestinal	Yes	Yes	11_012		2015				No		Yes	No	Yes		No			28SEP16	28SEP2016	11	Entered	40	Female	18OCT16	145	MF4637	<250 mg/day	No	No	<250 mg/day	No	Yes	Yes	Yes	Yes
Visit 1	9	Hypertension	cardiovascular	Yes	Yes	11_012	06SEP16	06SEP2016				No		Yes	No	Yes		No			28SEP16	28SEP2016	11	Entered	40	Female	18OCT16	145	MF4637	<250 mg/day	No	No	<250 mg/day	No	Yes	Yes	Yes	Yes
Visit 1	10	Tubal ligation	surgeries	N/A	No	11_012		2002				No		Yes	No	Yes		No			28SEP16	28SEP2016	11	Entered	40	Female	18OCT16	145	MF4637	<250 mg/day	No	No	<250 mg/day	No	Yes	Yes	Yes	Yes
Visit 2						11_012							No										11	Entered	40	Female	18OCT16	145	MF4637	<250 mg/day	No	No	<250 mg/day	No	Yes	Yes	Yes	Yes
Visit 1	1	TONSILLECTOMY	surgeries	N/A		11_014		1976		1976		No		Yes	Yes		Ultrasound	No	12AUG16	12AUG2016			11	Entered	49	Female	17NOV16	247	Placebo	>=250 mg/day	No	No	>=250 mg/day	No	Yes	Yes	Yes	No
Visit 1	2	IBSD	gastrointestinal	Yes	Yes	11_014		1987				No		Yes	Yes		Ultrasound	No	12AUG16	12AUG2016			11	Entered	49	Female	17NOV16	247	Placebo	>=250 mg/day	No	No	>=250 mg/day	No	Yes	Yes	Yes	No
Visit 1	3	GERD	gastrointestinal	Yes	Yes	11_014		2003				No		Yes	Yes		Ultrasound	No	12AUG16	12AUG2016			11	Entered	49	Female	17NOV16	247	Placebo	>=250 mg/day	No	No	>=250 mg/day	No	Yes	Yes	Yes	No
Visit 1	4	TUBAL LIGATION	surgeries	N/A		11_014		2006		2006		No		Yes	Yes		Ultrasound	No	12AUG16	12AUG2016			11	Entered	49	Female	17NOV16	247	Placebo	>=250 mg/day	No	No	>=250 mg/day	No	Yes	Yes	Yes	No
Visit 1	5	ENDOMETRIAL ABLATION	surgeries	N/A		11_014		2001		2011		No		Yes	Yes		Ultrasound	No	12AUG16	12AUG2016			11	Entered	49	Female	17NOV16	247	Placebo	>=250 mg/day	No	No	>=250 mg/day	No	Yes	Yes	Yes	No
Visit 1	6	CHOLECISTITIS	gastrointestinal	N/A		11_014		2010		2010		No		Yes	Yes		Ultrasound	No	12AUG16	12AUG2016			11	Entered	49	Female	17NOV16	247	Placebo	>=250 mg/day	No	No	>=250 mg/day	No	Yes	Yes	Yes	No
Visit 1	7	CHOLECYSTECTOMY	surgeries	N/A		11_014		2010		2010		No		Yes	Yes		Ultrasound	No	12AUG16	12AUG2016			11	Entered	49	Female	17NOV16	247	Placebo	>=250 mg/day	No	No	>=250 mg/day	No	Yes	Yes	Yes	No
Visit 1	8	BILE DUCTAL STONE REMOVAL	surgeries	N/A		11_014		2010		2010		No		Yes	Yes		Ultrasound	No	12AUG16	12AUG2016			11	Entered	49	Female	17NOV16	247	Placebo	>=250 mg/day	No	No	>=250 mg/day	No	Yes	Yes	Yes	No
Visit 1	9	KNEE SURGERY (MENISCUS)	surgeries	N/A		11_014		2006		2006		No		Yes	Yes		Ultrasound	No	12AUG16	12AUG2016			11	Entered	49	Female	17NOV16	247	Placebo	>=250 mg/day	No	No	>=250 mg/day	No	Yes	Yes	Yes	No
Visit 2						11_014							No										11	Entered	49	Female	17NOV16	247	Placebo	>=250 mg/day	No	No	>=250 mg/day	No	Yes	Yes	Yes	No
Visit 1	1	HYPERTENSION	cardiovascular	Yes	Yes	11_015		2000				No		Yes	No	Yes		No			23SEP16	23SEP2016	11	Entered	62	Male	10NOV16	245	MF4637	<250 mg/day	No	No	>=250 mg/day	No	Yes	Yes	Yes	Yes
Visit 1	2	CORONARY ARTERY DISEASE	cardiovascular	Yes	Yes	11_015		2012				No		Yes	No	Yes		No			23SEP16	23SEP2016	11	Entered	62	Male	10NOV16	245	MF4637	<250 mg/day	No	No	>=250 mg/day	No	Yes	Yes	Yes	Yes
Visit 1	3	GERD	gastrointestinal	Yes	Yes	11_015		2008				No		Yes	No	Yes		No			23SEP16	23SEP2016	11	Entered	62	Male	10NOV16	245	MF4637	<250 mg/day	No	No	>=250 mg/day	No	Yes	Yes	Yes	Yes
Visit 1	4	UMBILICAL HERNIA	gastrointestinal	Yes		11_015		2010		2010		No		Yes	No	Yes		No			23SEP16	23SEP2016	11	Entered	62	Male	10NOV16	245	MF4637	<250 mg/day	No	No	>=250 mg/day	No	Yes	Yes	Yes	Yes
Visit 1	5	UMBILICAL HERNIA REPAIR	surgeries	N/A		11_015		2010		2010		No		Yes	No	Yes		No			23SEP16	23SEP2016	11	Entered	62	Male	10NOV16	245	MF4637	<250 mg/day	No	No	>=250 mg/day	No	Yes	Yes	Yes	Yes
Visit 1	6	CATARACTS	surgeries	N/A		11_015		2015		2015		No		Yes	No	Yes		No			23SEP16	23SEP2016	11	Entered	62	Male	10NOV16	245	MF4637	<250 mg/day	No	No	>=250 mg/day	No	Yes	Yes	Yes	Yes
Visit 1	7	BACK SURGERY	surgeries	N/A		11_015		2014		2014		No		Yes	No	Yes		No			23SEP16	23SEP2016	11	Entered	62	Male	10NOV16	245	MF4637	<250 mg/day	No	No	>=250 mg/day	No	Yes	Yes	Yes	Yes
Visit 1	8	HIP TRANSPLANT	surgeries	N/A		11_015		04UNK2016		04UNK2016		No		Yes	No	Yes		No			23SEP16	23SEP2016	11	Entered	62	Male	10NOV16	245	MF4637	<250 mg/day	No	No	>=250 mg/day	No	Yes	Yes	Yes	Yes
Visit 1	9	CHRONIC BACK PAIN	musculoskeletal	Yes	Yes	11_015		2014				No		Yes	No	Yes		No			23SEP16	23SEP2016	11	Entered	62	Male	10NOV16	245	MF4637	<250 mg/day	No	No	>=250 mg/day	No	Yes	Yes	Yes	Yes
Visit 1	10	CIATICA	neurological	Yes	Yes	11_015		05UNK2009				No		Yes	No	Yes		No			23SEP16	23SEP2016	11	Entered	62	Male	10NOV16	245	MF4637	<250 mg/day	No	No	>=250 mg/day	No	Yes	Yes	Yes	Yes
Visit 2						11_015							No										11	Entered	62	Male	10NOV16	245	MF4637	<250 mg/day	No	No	>=250 mg/day	No	Yes	Yes	Yes	Yes
Visit 1	1	BREAST CANCER	genital/urinary	N/A		11_016		2010		2010		No		Yes	No	Yes		No			30NOV16	30NOV2016	11	Screen Failure	55	Female							>=250 mg/day	Yes	No	No	No	No
Visit 1	2	BILATERAL MASTECTOMY	surgeries	N/A		11_016		2010		2010		No		Yes	No	Yes		No			30NOV16	30NOV2016	11	Screen Failure	55	Female							>=250 mg/day	Yes	No	No	No	No
Visit 1	3	BREAST RECONSTRUCTION	surgeries	N/A		11_016		2011		2011		No		Yes	No	Yes		No			30NOV16	30NOV2016	11	Screen Failure	55	Female							>=250 mg/day	Yes	No	No	No	No
Visit 1	4	PARTIAL HYSTERECTOMY	surgeries	N/A		11_016		2008		2008		No		Yes	No	Yes		No			30NOV16	30NOV2016	11	Screen Failure	55	Female							>=250 mg/day	Yes	No	No	No	No
Visit 1	5	GILBERT`S DISEASE	liver	Yes	Yes	11_016		2011				No		Yes	No	Yes		No			30NOV16	30NOV2016	11	Screen Failure	55	Female							>=250 mg/day	Yes	No	No	No	No
Visit 1	6	CHOLELITIASIS	gastrointestinal	N/A		11_016		1994		1994		No		Yes	No	Yes		No			30NOV16	30NOV2016	11	Screen Failure	55	Female							>=250 mg/day	Yes	No	No	No	No
Visit 1	7	CHOLECYSTECTOMY	surgeries	N/A		11_016		1994		1994		No		Yes	No	Yes		No			30NOV16	30NOV2016	11	Screen Failure	55	Female							>=250 mg/day	Yes	No	No	No	No
Visit 1	1	CONSTIPATION	gastrointestinal	Yes	Yes	11_017		2014				No		Yes	Yes		Ultrasound	No	18JUL16	18JUL2016			11	Entered	32	Female	28NOV16	246	MF4637	<250 mg/day	No	No	<250 mg/day	No	Yes	Yes	Yes	Yes
Visit 1	2	PEPTIC ULCER	gastrointestinal	Yes	Yes	11_017		2014				No		Yes	Yes		Ultrasound	No	18JUL16	18JUL2016			11	Entered	32	Female	28NOV16	246	MF4637	<250 mg/day	No	No	<250 mg/day	No	Yes	Yes	Yes	Yes
Visit 1	3	DYSPEPSIA	gastrointestinal	Yes	Yes	11_017		2014				No		Yes	Yes		Ultrasound	No	18JUL16	18JUL2016			11	Entered	32	Female	28NOV16	246	MF4637	<250 mg/day	No	No	<250 mg/day	No	Yes	Yes	Yes	Yes
Visit 2						11_017							No										11	Entered	32	Female	28NOV16	246	MF4637	<250 mg/day	No	No	<250 mg/day	No	Yes	Yes	Yes	Yes
Visit 1	1	TUBAL LIGATION	surgeries	N/A		11_018	31DEC03	31DEC2003	31DEC03	31DEC2003		No		Yes	Yes		Ultrasound	No	26SEP16	26SEP2016			11	Entered	45	Female	29NOV16	248	Placebo	<250 mg/day	No	No	>=250 mg/day	No	Yes	Yes	Yes	Yes
Visit 1	2	DYSPHONIA	eyes, ears, nose, throat	Yes	Yes	11_018		JUL2016				No		Yes	Yes		Ultrasound	No	26SEP16	26SEP2016			11	Entered	45	Female	29NOV16	248	Placebo	<250 mg/day	No	No	>=250 mg/day	No	Yes	Yes	Yes	Yes
Visit 2						11_018							No										11	Entered	45	Female	29NOV16	248	Placebo	<250 mg/day	No	No	>=250 mg/day	No	Yes	Yes	Yes	Yes
Visit 1	1	CORONARY ARTERY DISEASE	cardiovascular	Yes	Yes	12_001		2009				Yes		Yes	No	Yes		No			09SEP16	09SEP2016	12	Entered	66	Male	14OCT16	257	MF4637	>=250 mg/day	Yes	Yes	>=250 mg/day	No	Yes	Yes	Yes	Yes
Visit 1	2	HYPERTENSION	cardiovascular	Yes	Yes	12_001		2008				Yes		Yes	No	Yes		No			09SEP16	09SEP2016	12	Entered	66	Male	14OCT16	257	MF4637	>=250 mg/day	Yes	Yes	>=250 mg/day	No	Yes	Yes	Yes	Yes
Visit 1	3	BENIGN PROSTATIC HYPERPLASIA	genital/urinary	Yes	Yes	12_001		2015				Yes		Yes	No	Yes		No			09SEP16	09SEP2016	12	Entered	66	Male	14OCT16	257	MF4637	>=250 mg/day	Yes	Yes	>=250 mg/day	No	Yes	Yes	Yes	Yes
Visit 1	4	DYSLIPIDEMIA	endocrine	Yes	Yes	12_001		2009				Yes		Yes	No	Yes		No			09SEP16	09SEP2016	12	Entered	66	Male	14OCT16	257	MF4637	>=250 mg/day	Yes	Yes	>=250 mg/day	No	Yes	Yes	Yes	Yes
Visit 1	5	CHRONIC OBSTRUCTIVE PULMONARY DISEASE	eyes, ears, nose, throat	Yes	Yes	12_001		2010				Yes		Yes	No	Yes		No			09SEP16	09SEP2016	12	Entered	66	Male	14OCT16	257	MF4637	>=250 mg/day	Yes	Yes	>=250 mg/day	No	Yes	Yes	Yes	Yes
Visit 1	6	STROKE	neurological	Yes		12_001		12UNK2009		12UNK2009		Yes		Yes	No	Yes		No			09SEP16	09SEP2016	12	Entered	66	Male	14OCT16	257	MF4637	>=250 mg/day	Yes	Yes	>=250 mg/day	No	Yes	Yes	Yes	Yes
Visit 1	7	LEFT HEMIPLEGIA	neurological	Yes	Yes	12_001		12UNK2009				Yes		Yes	No	Yes		No			09SEP16	09SEP2016	12	Entered	66	Male	14OCT16	257	MF4637	>=250 mg/day	Yes	Yes	>=250 mg/day	No	Yes	Yes	Yes	Yes
Visit 1	8	DEPRESSION	psychological	Yes	Yes	12_001		2010				Yes		Yes	No	Yes		No			09SEP16	09SEP2016	12	Entered	66	Male	14OCT16	257	MF4637	>=250 mg/day	Yes	Yes	>=250 mg/day	No	Yes	Yes	Yes	Yes
Visit 1	9	GASTROESOPHAGEAL RELFUX DISEASE	gastrointestinal	Yes	Yes	12_001		2010				Yes		Yes	No	Yes		No			09SEP16	09SEP2016	12	Entered	66	Male	14OCT16	257	MF4637	>=250 mg/day	Yes	Yes	>=250 mg/day	No	Yes	Yes	Yes	Yes
Visit 1	10	PERIPHERAL VASCULAR DISEASE	cardiovascular	Yes	Yes	12_001		2010				Yes		Yes	No	Yes		No			09SEP16	09SEP2016	12	Entered	66	Male	14OCT16	257	MF4637	>=250 mg/day	Yes	Yes	>=250 mg/day	No	Yes	Yes	Yes	Yes
Visit 1	11	BENIGN PULMONARY NODULE	eyes, ears, nose, throat	Yes	Yes	12_001		2010				Yes		Yes	No	Yes		No			09SEP16	09SEP2016	12	Entered	66	Male	14OCT16	257	MF4637	>=250 mg/day	Yes	Yes	>=250 mg/day	No	Yes	Yes	Yes	Yes
Visit 1	12	EXTRACORPOREAL LITHOTRIPSY	genital/urinary	Yes		12_001		1985		1985		Yes		Yes	No	Yes		No			09SEP16	09SEP2016	12	Entered	66	Male	14OCT16	257	MF4637	>=250 mg/day	Yes	Yes	>=250 mg/day	No	Yes	Yes	Yes	Yes
Visit 1	13	SEBORRHEIC DERMATITIS	dermatological	Yes	Yes	12_001		1982				Yes		Yes	No	Yes		No			09SEP16	09SEP2016	12	Entered	66	Male	14OCT16	257	MF4637	>=250 mg/day	Yes	Yes	>=250 mg/day	No	Yes	Yes	Yes	Yes
Visit 1	14	PROCTITIS	gastrointestinal	Yes	Yes	12_001		2010				Yes		Yes	No	Yes		No			09SEP16	09SEP2016	12	Entered	66	Male	14OCT16	257	MF4637	>=250 mg/day	Yes	Yes	>=250 mg/day	No	Yes	Yes	Yes	Yes
Visit 1	15	MUSCLE PAIN	musculoskeletal	Yes	Yes	12_001		2010				Yes		Yes	No	Yes		No			09SEP16	09SEP2016	12	Entered	66	Male	14OCT16	257	MF4637	>=250 mg/day	Yes	Yes	>=250 mg/day	No	Yes	Yes	Yes	Yes
Visit 1	16	ALLERGIC CONJUNCTIVITIS	eyes, ears, nose, throat	Yes	Yes	12_001		2014				Yes		Yes	No	Yes		No			09SEP16	09SEP2016	12	Entered	66	Male	14OCT16	257	MF4637	>=250 mg/day	Yes	Yes	>=250 mg/day	No	Yes	Yes	Yes	Yes
Visit 1	17	KIDNEY STONES	genital/urinary	Yes		12_001		1985		1985		Yes		Yes	No	Yes		No			09SEP16	09SEP2016	12	Entered	66	Male	14OCT16	257	MF4637	>=250 mg/day	Yes	Yes	>=250 mg/day	No	Yes	Yes	Yes	Yes
Visit 1	18	OBESITY	endocrine	Yes	Yes	12_001		2006				Yes		Yes	No	Yes		No			09SEP16	09SEP2016	12	Entered	66	Male	14OCT16	257	MF4637	>=250 mg/day	Yes	Yes	>=250 mg/day	No	Yes	Yes	Yes	Yes
Visit 1	19	DIABETES MELLITUS TYPE II	endocrine	Yes	Yes	12_001		2008				Yes		Yes	No	Yes		No			09SEP16	09SEP2016	12	Entered	66	Male	14OCT16	257	MF4637	>=250 mg/day	Yes	Yes	>=250 mg/day	No	Yes	Yes	Yes	Yes
Visit 1	20	RIGHT LUMBAR ABDOMINAL SURGERY FOR KIDNEY STONES	surgeries	Yes		12_001		1990		1990		Yes		Yes	No	Yes		No			09SEP16	09SEP2016	12	Entered	66	Male	14OCT16	257	MF4637	>=250 mg/day	Yes	Yes	>=250 mg/day	No	Yes	Yes	Yes	Yes
Visit 2	1	CORONARY ARTERY DISEASE	cardiovascular	Yes	Yes	12_001		2009					No										12	Entered	66	Male	14OCT16	257	MF4637	>=250 mg/day	Yes	Yes	>=250 mg/day	No	Yes	Yes	Yes	Yes
Visit 2	2	HYPERTENSION	cardiovascular	Yes	Yes	12_001		2008					No										12	Entered	66	Male	14OCT16	257	MF4637	>=250 mg/day	Yes	Yes	>=250 mg/day	No	Yes	Yes	Yes	Yes
Visit 2	3	BENIGN PROSTATIC HYPERPLASIA	genital/urinary	Yes	Yes	12_001		2015					No										12	Entered	66	Male	14OCT16	257	MF4637	>=250 mg/day	Yes	Yes	>=250 mg/day	No	Yes	Yes	Yes	Yes
Visit 2	4	DYSLIPIDEMIA	endocrine	Yes	Yes	12_001		2009					No										12	Entered	66	Male	14OCT16	257	MF4637	>=250 mg/day	Yes	Yes	>=250 mg/day	No	Yes	Yes	Yes	Yes
Visit 2	5	CHRONIC OBSTRUCTIVE PULMONARY DISEASE	eyes, ears, nose, throat	Yes	Yes	12_001		2010					No										12	Entered	66	Male	14OCT16	257	MF4637	>=250 mg/day	Yes	Yes	>=250 mg/day	No	Yes	Yes	Yes	Yes
Visit 2	6	STROKE	neurological	Yes		12_001		12UNK2009		12UNK2009			No										12	Entered	66	Male	14OCT16	257	MF4637	>=250 mg/day	Yes	Yes	>=250 mg/day	No	Yes	Yes	Yes	Yes
Visit 2	7	LEFT HEMIPLEGIA	neurological	Yes	Yes	12_001		12UNK2009					No										12	Entered	66	Male	14OCT16	257	MF4637	>=250 mg/day	Yes	Yes	>=250 mg/day	No	Yes	Yes	Yes	Yes
Visit 2	8	DEPRESSION	psychological	Yes	Yes	12_001		2010					No										12	Entered	66	Male	14OCT16	257	MF4637	>=250 mg/day	Yes	Yes	>=250 mg/day	No	Yes	Yes	Yes	Yes
Visit 2	9	GASTROESOPHAGEAL RELFUX DISEASE	gastrointestinal	Yes	Yes	12_001		2010					No										12	Entered	66	Male	14OCT16	257	MF4637	>=250 mg/day	Yes	Yes	>=250 mg/day	No	Yes	Yes	Yes	Yes
Visit 2	10	PERIPHERAL VASCULAR DISEASE	cardiovascular	Yes	Yes	12_001		2010					No										12	Entered	66	Male	14OCT16	257	MF4637	>=250 mg/day	Yes	Yes	>=250 mg/day	No	Yes	Yes	Yes	Yes
Visit 2	11	BENIGN PULMONARY NODULE	eyes, ears, nose, throat	Yes	Yes	12_001		2010					No										12	Entered	66	Male	14OCT16	257	MF4637	>=250 mg/day	Yes	Yes	>=250 mg/day	No	Yes	Yes	Yes	Yes
Visit 2	12	EXTRACORPOREAL LITHOTRIPSY	genital/urinary	Yes		12_001		1985		1985			No										12	Entered	66	Male	14OCT16	257	MF4637	>=250 mg/day	Yes	Yes	>=250 mg/day	No	Yes	Yes	Yes	Yes
Visit 2	13	SEBORRHEIC DERMATITIS	dermatological	Yes	Yes	12_001		1982					No										12	Entered	66	Male	14OCT16	257	MF4637	>=250 mg/day	Yes	Yes	>=250 mg/day	No	Yes	Yes	Yes	Yes
Visit 2	14	PROCTITIS	gastrointestinal	Yes	Yes	12_001		2010					No										12	Entered	66	Male	14OCT16	257	MF4637	>=250 mg/day	Yes	Yes	>=250 mg/day	No	Yes	Yes	Yes	Yes
Visit 2	15	MUSCLE PAIN	musculoskeletal	Yes	Yes	12_001		2010					No										12	Entered	66	Male	14OCT16	257	MF4637	>=250 mg/day	Yes	Yes	>=250 mg/day	No	Yes	Yes	Yes	Yes
Visit 2	16	ALLERGIC CONJUNCTIVITIS	eyes, ears, nose, throat	Yes		12_001		2014		2014			No										12	Entered	66	Male	14OCT16	257	MF4637	>=250 mg/day	Yes	Yes	>=250 mg/day	No	Yes	Yes	Yes	Yes
Visit 2	17	KIDNEY STONES	genital/urinary	Yes		12_001		1985		1985			No										12	Entered	66	Male	14OCT16	257	MF4637	>=250 mg/day	Yes	Yes	>=250 mg/day	No	Yes	Yes	Yes	Yes
Visit 2	18	OBESITY	endocrine	Yes	Yes	12_001		2006					No										12	Entered	66	Male	14OCT16	257	MF4637	>=250 mg/day	Yes	Yes	>=250 mg/day	No	Yes	Yes	Yes	Yes
Visit 2	19	DIABETES MELLITUS TYPE II	endocrine	Yes	Yes	12_001		2008					No										12	Entered	66	Male	14OCT16	257	MF4637	>=250 mg/day	Yes	Yes	>=250 mg/day	No	Yes	Yes	Yes	Yes
Visit 2	20	RIGHT LUMBAR ABDOMINAL SURGERY FOR KIDNEY STONES	surgeries	Yes		12_001		1990		1990			No										12	Entered	66	Male	14OCT16	257	MF4637	>=250 mg/day	Yes	Yes	>=250 mg/day	No	Yes	Yes	Yes	Yes
Visit 1	1	DIABETES MELLITUS TYPE II	endocrine	Yes	Yes	12_003		2012				Yes		Yes	No	Yes		No			13SEP16	13SEP2016	12	Entered	52	Male	11OCT16	138	Placebo	>=250 mg/day	Yes	No	>=250 mg/day	No	Yes	Yes	Yes	Yes
Visit 1	2	HYPERTENSION	cardiovascular	Yes	Yes	12_003		2012				Yes		Yes	No	Yes		No			13SEP16	13SEP2016	12	Entered	52	Male	11OCT16	138	Placebo	>=250 mg/day	Yes	No	>=250 mg/day	No	Yes	Yes	Yes	Yes
Visit 1	3	DYSLIPIDEMIA	endocrine	Yes	Yes	12_003		2012				Yes		Yes	No	Yes		No			13SEP16	13SEP2016	12	Entered	52	Male	11OCT16	138	Placebo	>=250 mg/day	Yes	No	>=250 mg/day	No	Yes	Yes	Yes	Yes
Visit 1	4	LUMBALGIA	musculoskeletal	Yes		12_003		2015		2015		Yes		Yes	No	Yes		No			13SEP16	13SEP2016	12	Entered	52	Male	11OCT16	138	Placebo	>=250 mg/day	Yes	No	>=250 mg/day	No	Yes	Yes	Yes	Yes
Visit 1	5	OVERWEIGHT	endocrine	Yes	Yes	12_003		2010				Yes		Yes	No	Yes		No			13SEP16	13SEP2016	12	Entered	52	Male	11OCT16	138	Placebo	>=250 mg/day	Yes	No	>=250 mg/day	No	Yes	Yes	Yes	Yes
Visit 1	6	VITAMIN D DEFICIENCY	endocrine	Yes	Yes	12_003		03UNK2016				Yes		Yes	No	Yes		No			13SEP16	13SEP2016	12	Entered	52	Male	11OCT16	138	Placebo	>=250 mg/day	Yes	No	>=250 mg/day	No	Yes	Yes	Yes	Yes
Visit 1	7	DIABETIC NEUROPATHY	neurological	Yes	Yes	12_003		2014				Yes		Yes	No	Yes		No			13SEP16	13SEP2016	12	Entered	52	Male	11OCT16	138	Placebo	>=250 mg/day	Yes	No	>=250 mg/day	No	Yes	Yes	Yes	Yes
Visit 2	1	DIABETES MELLITUS TYPE II	endocrine	Yes	Yes	12_003		2012					No										12	Entered	52	Male	11OCT16	138	Placebo	>=250 mg/day	Yes	No	>=250 mg/day	No	Yes	Yes	Yes	Yes
Visit 2	2	HYPERTENSION	cardiovascular	Yes	Yes	12_003		2012					No										12	Entered	52	Male	11OCT16	138	Placebo	>=250 mg/day	Yes	No	>=250 mg/day	No	Yes	Yes	Yes	Yes
Visit 2	3	DYSLIPIDEMIA	endocrine	Yes	Yes	12_003		2012					No										12	Entered	52	Male	11OCT16	138	Placebo	>=250 mg/day	Yes	No	>=250 mg/day	No	Yes	Yes	Yes	Yes
Visit 2	4	LUMBALGIA	musculoskeletal	Yes		12_003		2015		2015			No										12	Entered	52	Male	11OCT16	138	Placebo	>=250 mg/day	Yes	No	>=250 mg/day	No	Yes	Yes	Yes	Yes
Visit 2	5	OVERWEIGHT	endocrine	Yes	Yes	12_003		2010					No										12	Entered	52	Male	11OCT16	138	Placebo	>=250 mg/day	Yes	No	>=250 mg/day	No	Yes	Yes	Yes	Yes
Visit 2	6	VITAMIN D DEFICIENCY	endocrine	Yes	Yes	12_003		03UNK2016					No										12	Entered	52	Male	11OCT16	138	Placebo	>=250 mg/day	Yes	No	>=250 mg/day	No	Yes	Yes	Yes	Yes
Visit 2	7	DIABETIC NEUROPATHY	neurological	Yes	Yes	12_003		2014					No										12	Entered	52	Male	11OCT16	138	Placebo	>=250 mg/day	Yes	No	>=250 mg/day	No	Yes	Yes	Yes	Yes
Visit 1	1	DIABETES MELLITUS TYPE II	endocrine	Yes	Yes	12_004		2006				Yes		Yes	No	Yes		No			15SEP16	15SEP2016	12	Entered	70	Male	22SEP16	133	Placebo	>=250 mg/day	Yes	Yes	>=250 mg/day	No	Yes	Yes	Yes	Yes
Visit 1	2	HYPERTENSION	cardiovascular	Yes	Yes	12_004		2006				Yes		Yes	No	Yes		No			15SEP16	15SEP2016	12	Entered	70	Male	22SEP16	133	Placebo	>=250 mg/day	Yes	Yes	>=250 mg/day	No	Yes	Yes	Yes	Yes
Visit 1	3	DYSLIPIDEMIA	liver	Yes	Yes	12_004		2011				Yes		Yes	No	Yes		No			15SEP16	15SEP2016	12	Entered	70	Male	22SEP16	133	Placebo	>=250 mg/day	Yes	Yes	>=250 mg/day	No	Yes	Yes	Yes	Yes
Visit 1	4	GASTROESOPHAGEAL RELFUX DISEASE	gastrointestinal	Yes	Yes	12_004		2010				Yes		Yes	No	Yes		No			15SEP16	15SEP2016	12	Entered	70	Male	22SEP16	133	Placebo	>=250 mg/day	Yes	Yes	>=250 mg/day	No	Yes	Yes	Yes	Yes
Visit 1	5	OBESITY	endocrine	Yes	Yes	12_004		2006				Yes		Yes	No	Yes		No			15SEP16	15SEP2016	12	Entered	70	Male	22SEP16	133	Placebo	>=250 mg/day	Yes	Yes	>=250 mg/day	No	Yes	Yes	Yes	Yes
Visit 1	6	ALLERGIC RHINITIS	allergies	Yes	Yes	12_004		08UNK2015				Yes		Yes	No	Yes		No			15SEP16	15SEP2016	12	Entered	70	Male	22SEP16	133	Placebo	>=250 mg/day	Yes	Yes	>=250 mg/day	No	Yes	Yes	Yes	Yes
Visit 1	7	OSTEOARTHRITIS	musculoskeletal	Yes	Yes	12_004		2011				Yes		Yes	No	Yes		No			15SEP16	15SEP2016	12	Entered	70	Male	22SEP16	133	Placebo	>=250 mg/day	Yes	Yes	>=250 mg/day	No	Yes	Yes	Yes	Yes
Visit 1	8	URINARY INCONTINENCE	genital/urinary	Yes	Yes	12_004		06UNK2015				Yes		Yes	No	Yes		No			15SEP16	15SEP2016	12	Entered	70	Male	22SEP16	133	Placebo	>=250 mg/day	Yes	Yes	>=250 mg/day	No	Yes	Yes	Yes	Yes
Visit 1	9	BENIGN PROSTATIC HYPERTROPHY	genital/urinary	Yes	Yes	12_004		05UNK2016				Yes		Yes	No	Yes		No			15SEP16	15SEP2016	12	Entered	70	Male	22SEP16	133	Placebo	>=250 mg/day	Yes	Yes	>=250 mg/day	No	Yes	Yes	Yes	Yes
Visit 1	10	DEPRESSION	psychological	Yes	Yes	12_004		2015				Yes		Yes	No	Yes		No			15SEP16	15SEP2016	12	Entered	70	Male	22SEP16	133	Placebo	>=250 mg/day	Yes	Yes	>=250 mg/day	No	Yes	Yes	Yes	Yes
Visit 1	11	INSOMNIA	psychological	Yes	Yes	12_004		2015				Yes		Yes	No	Yes		No			15SEP16	15SEP2016	12	Entered	70	Male	22SEP16	133	Placebo	>=250 mg/day	Yes	Yes	>=250 mg/day	No	Yes	Yes	Yes	Yes
Visit 1	12	ERECTILE DYSFUNCTION	genital/urinary	Yes	Yes	12_004		2010				Yes		Yes	No	Yes		No			15SEP16	15SEP2016	12	Entered	70	Male	22SEP16	133	Placebo	>=250 mg/day	Yes	Yes	>=250 mg/day	No	Yes	Yes	Yes	Yes
Visit 2	1	DIABETES MELLITUS TYPE II	endocrine	Yes	Yes	12_004		2006					No										12	Entered	70	Male	22SEP16	133	Placebo	>=250 mg/day	Yes	Yes	>=250 mg/day	No	Yes	Yes	Yes	Yes
Visit 2	2	HYPERTENSION	cardiovascular	Yes	Yes	12_004		2006					No										12	Entered	70	Male	22SEP16	133	Placebo	>=250 mg/day	Yes	Yes	>=250 mg/day	No	Yes	Yes	Yes	Yes
Visit 2	3	DYSLIPIDEMIA	liver	Yes	Yes	12_004		2011					No										12	Entered	70	Male	22SEP16	133	Placebo	>=250 mg/day	Yes	Yes	>=250 mg/day	No	Yes	Yes	Yes	Yes
Visit 2	4	GASTROESOPHAGEAL RELFUX DISEASE	gastrointestinal	Yes	Yes	12_004		2010					No										12	Entered	70	Male	22SEP16	133	Placebo	>=250 mg/day	Yes	Yes	>=250 mg/day	No	Yes	Yes	Yes	Yes
Visit 2	5	OBESITY	endocrine	Yes	Yes	12_004		2006					No										12	Entered	70	Male	22SEP16	133	Placebo	>=250 mg/day	Yes	Yes	>=250 mg/day	No	Yes	Yes	Yes	Yes
Visit 2	6	ALLERGIC RHINITIS	allergies	Yes	Yes	12_004		08UNK2015					No										12	Entered	70	Male	22SEP16	133	Placebo	>=250 mg/day	Yes	Yes	>=250 mg/day	No	Yes	Yes	Yes	Yes
Visit 2	7	OSTEOARTHRITIS	musculoskeletal	Yes	Yes	12_004		2011					No										12	Entered	70	Male	22SEP16	133	Placebo	>=250 mg/day	Yes	Yes	>=250 mg/day	No	Yes	Yes	Yes	Yes
Visit 2	8	URINARY INCONTINENCE	genital/urinary	Yes	Yes	12_004		06UNK2015					No										12	Entered	70	Male	22SEP16	133	Placebo	>=250 mg/day	Yes	Yes	>=250 mg/day	No	Yes	Yes	Yes	Yes
Visit 2	9	BENIGN PROSTATIC HYPERTROPHY	genital/urinary	Yes	Yes	12_004		05UNK2016					No										12	Entered	70	Male	22SEP16	133	Placebo	>=250 mg/day	Yes	Yes	>=250 mg/day	No	Yes	Yes	Yes	Yes
Visit 2	10	DEPRESSION	psychological	Yes	Yes	12_004		2015					No										12	Entered	70	Male	22SEP16	133	Placebo	>=250 mg/day	Yes	Yes	>=250 mg/day	No	Yes	Yes	Yes	Yes
Visit 2	11	INSOMNIA	psychological	Yes	Yes	12_004		2015					No										12	Entered	70	Male	22SEP16	133	Placebo	>=250 mg/day	Yes	Yes	>=250 mg/day	No	Yes	Yes	Yes	Yes
Visit 2	12	ERECTILE DYSFUNCTION	genital/urinary	Yes	Yes	12_004		2010					No										12	Entered	70	Male	22SEP16	133	Placebo	>=250 mg/day	Yes	Yes	>=250 mg/day	No	Yes	Yes	Yes	Yes
Visit 1	1	Diabetes Mellitus Type 2	endocrine	Yes	Yes	12_006		1988				Yes		Yes	No	Yes		No			15SEP16	15SEP2016	12	Entered	76	Female	22SEP16	132	MF4637	<250 mg/day	Yes	Yes	<250 mg/day	No	Yes	Yes	Yes	Yes
Visit 1	2	HYPERTENSION	cardiovascular	Yes	Yes	12_006		1978				Yes		Yes	No	Yes		No			15SEP16	15SEP2016	12	Entered	76	Female	22SEP16	132	MF4637	<250 mg/day	Yes	Yes	<250 mg/day	No	Yes	Yes	Yes	Yes
Visit 1	3	DIABETIC NEUROPATHY	neurological	Yes	Yes	12_006		2000				Yes		Yes	No	Yes		No			15SEP16	15SEP2016	12	Entered	76	Female	22SEP16	132	MF4637	<250 mg/day	Yes	Yes	<250 mg/day	No	Yes	Yes	Yes	Yes
Visit 1	4	GASTRITIS	gastrointestinal	Yes	Yes	12_006		2015				Yes		Yes	No	Yes		No			15SEP16	15SEP2016	12	Entered	76	Female	22SEP16	132	MF4637	<250 mg/day	Yes	Yes	<250 mg/day	No	Yes	Yes	Yes	Yes
Visit 1	5	OSTEOARTHRITIS	musculoskeletal	Yes	Yes	12_006		2006				Yes		Yes	No	Yes		No			15SEP16	15SEP2016	12	Entered	76	Female	22SEP16	132	MF4637	<250 mg/day	Yes	Yes	<250 mg/day	No	Yes	Yes	Yes	Yes
Visit 1	6	ARRHYTHMIA	cardiovascular	Yes	Yes	12_006		2011				Yes		Yes	No	Yes		No			15SEP16	15SEP2016	12	Entered	76	Female	22SEP16	132	MF4637	<250 mg/day	Yes	Yes	<250 mg/day	No	Yes	Yes	Yes	Yes
Visit 1	7	OBESITY	endocrine	Yes	Yes	12_006		1990				Yes		Yes	No	Yes		No			15SEP16	15SEP2016	12	Entered	76	Female	22SEP16	132	MF4637	<250 mg/day	Yes	Yes	<250 mg/day	No	Yes	Yes	Yes	Yes
Visit 1	8	URINARY INCONTINENCE	genital/urinary	Yes	Yes	12_006		2011				Yes		Yes	No	Yes		No			15SEP16	15SEP2016	12	Entered	76	Female	22SEP16	132	MF4637	<250 mg/day	Yes	Yes	<250 mg/day	No	Yes	Yes	Yes	Yes
Visit 1	9	MEMORY LOSS	neurological	Yes	Yes	12_006		2015				Yes		Yes	No	Yes		No			15SEP16	15SEP2016	12	Entered	76	Female	22SEP16	132	MF4637	<250 mg/day	Yes	Yes	<250 mg/day	No	Yes	Yes	Yes	Yes
Visit 1	10	DYSLIPIDEMIA	liver	Yes	Yes	12_006		2015				Yes		Yes	No	Yes		No			15SEP16	15SEP2016	12	Entered	76	Female	22SEP16	132	MF4637	<250 mg/day	Yes	Yes	<250 mg/day	No	Yes	Yes	Yes	Yes
Visit 1	11	GALLBLADDER STONES	gastrointestinal	Yes		12_006		2014		01UNK2016		Yes		Yes	No	Yes		No			15SEP16	15SEP2016	12	Entered	76	Female	22SEP16	132	MF4637	<250 mg/day	Yes	Yes	<250 mg/day	No	Yes	Yes	Yes	Yes
Visit 1	12	CHOLECYSTECTOMY	surgeries	N/A		12_006		01UNK2016		01UNK2016		Yes		Yes	No	Yes		No			15SEP16	15SEP2016	12	Entered	76	Female	22SEP16	132	MF4637	<250 mg/day	Yes	Yes	<250 mg/day	No	Yes	Yes	Yes	Yes
Visit 1	13	CESAREAN SECTION	surgeries	N/A		12_006	11JUL64	11JUL1964	11JUL64	11JUL1964		Yes		Yes	No	Yes		No			15SEP16	15SEP2016	12	Entered	76	Female	22SEP16	132	MF4637	<250 mg/day	Yes	Yes	<250 mg/day	No	Yes	Yes	Yes	Yes
Visit 1	14	PENICILLIN ALLERGY	allergies	Yes	Yes	12_006		1969				Yes		Yes	No	Yes		No			15SEP16	15SEP2016	12	Entered	76	Female	22SEP16	132	MF4637	<250 mg/day	Yes	Yes	<250 mg/day	No	Yes	Yes	Yes	Yes
Visit 1	15	COLONIC POLYPS	gastrointestinal	Yes		12_006		2014		2015		Yes		Yes	No	Yes		No			15SEP16	15SEP2016	12	Entered	76	Female	22SEP16	132	MF4637	<250 mg/day	Yes	Yes	<250 mg/day	No	Yes	Yes	Yes	Yes
Visit 1	16	SURGICAL COLONIC POLYPS RESECTION	gastrointestinal	N/A		12_006		2015		2015		Yes		Yes	No	Yes		No			15SEP16	15SEP2016	12	Entered	76	Female	22SEP16	132	MF4637	<250 mg/day	Yes	Yes	<250 mg/day	No	Yes	Yes	Yes	Yes
Visit 1	17	POSTMENOPAUSAL	genital/urinary	Yes	Yes	12_006		1988				Yes		Yes	No	Yes		No			15SEP16	15SEP2016	12	Entered	76	Female	22SEP16	132	MF4637	<250 mg/day	Yes	Yes	<250 mg/day	No	Yes	Yes	Yes	Yes
Visit 1	18	PERIPHERAL VASCULAR DISEASE	cardiovascular	Yes	Yes	12_006		2015				Yes		Yes	No	Yes		No			15SEP16	15SEP2016	12	Entered	76	Female	22SEP16	132	MF4637	<250 mg/day	Yes	Yes	<250 mg/day	No	Yes	Yes	Yes	Yes
Visit 2						12_006							No										12	Entered	76	Female	22SEP16	132	MF4637	<250 mg/day	Yes	Yes	<250 mg/day	No	Yes	Yes	Yes	Yes
Visit 1	1	HYPERTENSION	cardiovascular	Yes	Yes	12_007		02UNK2010				No		Yes	No	Yes		No			16SEP16	16SEP2016	12	Entered	64	Female	30SEP16	134	Placebo	>=250 mg/day	No	Yes	>=250 mg/day	No	Yes	Yes	Yes	Yes
Visit 1	2	DEPRESSION	psychological	Yes	Yes	12_007		2000				No		Yes	No	Yes		No			16SEP16	16SEP2016	12	Entered	64	Female	30SEP16	134	Placebo	>=250 mg/day	No	Yes	>=250 mg/day	No	Yes	Yes	Yes	Yes
Visit 1	3	INSOMNIA	psychological	Yes	Yes	12_007		1980				No		Yes	No	Yes		No			16SEP16	16SEP2016	12	Entered	64	Female	30SEP16	134	Placebo	>=250 mg/day	No	Yes	>=250 mg/day	No	Yes	Yes	Yes	Yes
Visit 1	4	ASTHMA	eyes, ears, nose, throat	Yes	Yes	12_007		2006				No		Yes	No	Yes		No			16SEP16	16SEP2016	12	Entered	64	Female	30SEP16	134	Placebo	>=250 mg/day	No	Yes	>=250 mg/day	No	Yes	Yes	Yes	Yes
Visit 1	5	DYSLIPIDEMIA	endocrine	Yes	Yes	12_007		2010				No		Yes	No	Yes		No			16SEP16	16SEP2016	12	Entered	64	Female	30SEP16	134	Placebo	>=250 mg/day	No	Yes	>=250 mg/day	No	Yes	Yes	Yes	Yes
Visit 1	6	OBESITY	endocrine	Yes	Yes	12_007		2014				No		Yes	No	Yes		No			16SEP16	16SEP2016	12	Entered	64	Female	30SEP16	134	Placebo	>=250 mg/day	No	Yes	>=250 mg/day	No	Yes	Yes	Yes	Yes
Visit 1	7	POSTMENOPAUSAL	genital/urinary	Yes	Yes	12_007		2000				No		Yes	No	Yes		No			16SEP16	16SEP2016	12	Entered	64	Female	30SEP16	134	Placebo	>=250 mg/day	No	Yes	>=250 mg/day	No	Yes	Yes	Yes	Yes
Visit 1	8	BREAST CARCINOMA IN SITU	cancer	Yes		12_007		02UNK2000		02UNK2000		No		Yes	No	Yes		No			16SEP16	16SEP2016	12	Entered	64	Female	30SEP16	134	Placebo	>=250 mg/day	No	Yes	>=250 mg/day	No	Yes	Yes	Yes	Yes
Visit 1	9	LUMPECTOMY	surgeries	Yes		12_007		02UNK2000		02UNK2000		No		Yes	No	Yes		No			16SEP16	16SEP2016	12	Entered	64	Female	30SEP16	134	Placebo	>=250 mg/day	No	Yes	>=250 mg/day	No	Yes	Yes	Yes	Yes
Visit 1	10	APPENDECTOMY	surgeries	Yes		12_007		1964		1964		No		Yes	No	Yes		No			16SEP16	16SEP2016	12	Entered	64	Female	30SEP16	134	Placebo	>=250 mg/day	No	Yes	>=250 mg/day	No	Yes	Yes	Yes	Yes
Visit 1	11	TONSILLECTOMY	surgeries	Yes		12_007		1965		1965		No		Yes	No	Yes		No			16SEP16	16SEP2016	12	Entered	64	Female	30SEP16	134	Placebo	>=250 mg/day	No	Yes	>=250 mg/day	No	Yes	Yes	Yes	Yes
Visit 1	12	ALLERGIC RHINITIS	allergies	Yes	Yes	12_007		2010				No		Yes	No	Yes		No			16SEP16	16SEP2016	12	Entered	64	Female	30SEP16	134	Placebo	>=250 mg/day	No	Yes	>=250 mg/day	No	Yes	Yes	Yes	Yes
Visit 1	13	ALZHEIMER'S DISEASE	neurological	Yes	Yes	12_007		2014				No		Yes	No	Yes		No			16SEP16	16SEP2016	12	Entered	64	Female	30SEP16	134	Placebo	>=250 mg/day	No	Yes	>=250 mg/day	No	Yes	Yes	Yes	Yes
Visit 1	14	OSTEOARTHRITIS	musculoskeletal	Yes	Yes	12_007		2010				No		Yes	No	Yes		No			16SEP16	16SEP2016	12	Entered	64	Female	30SEP16	134	Placebo	>=250 mg/day	No	Yes	>=250 mg/day	No	Yes	Yes	Yes	Yes
Visit 1	15	APPENDICITIS	gastrointestinal	Yes		12_007		1964		1964		No		Yes	No	Yes		No			16SEP16	16SEP2016	12	Entered	64	Female	30SEP16	134	Placebo	>=250 mg/day	No	Yes	>=250 mg/day	No	Yes	Yes	Yes	Yes
Visit 1	16	TONSILLITIS	eyes, ears, nose, throat	Yes		12_007		1964		1964		No		Yes	No	Yes		No			16SEP16	16SEP2016	12	Entered	64	Female	30SEP16	134	Placebo	>=250 mg/day	No	Yes	>=250 mg/day	No	Yes	Yes	Yes	Yes
Visit 1	17	CARPAL TUNNEL SYNDROME	musculoskeletal	Yes		12_007		2005		2005		No		Yes	No	Yes		No			16SEP16	16SEP2016	12	Entered	64	Female	30SEP16	134	Placebo	>=250 mg/day	No	Yes	>=250 mg/day	No	Yes	Yes	Yes	Yes
Visit 1	18	CARPAL TUNNEL SURGERY	surgeries	Yes		12_007		2005		2005		No		Yes	No	Yes		No			16SEP16	16SEP2016	12	Entered	64	Female	30SEP16	134	Placebo	>=250 mg/day	No	Yes	>=250 mg/day	No	Yes	Yes	Yes	Yes
Visit 1	19	SCALP SEBACEOUS CYST	dermatological	Yes		12_007		2015	19SEP16	19SEP2016		No		Yes	No	Yes		No			16SEP16	16SEP2016	12	Entered	64	Female	30SEP16	134	Placebo	>=250 mg/day	No	Yes	>=250 mg/day	No	Yes	Yes	Yes	Yes
Visit 1	20	SCALP SEBACEOUS CYST REMOVAL	surgeries	Yes		12_007	19SEP16	19SEP2016	19SEP16	19SEP2016		No		Yes	No	Yes		No			16SEP16	16SEP2016	12	Entered	64	Female	30SEP16	134	Placebo	>=250 mg/day	No	Yes	>=250 mg/day	No	Yes	Yes	Yes	Yes
Visit 2	1	HYPERTENSION	cardiovascular	Yes	Yes	12_007		02UNK2010					No										12	Entered	64	Female	30SEP16	134	Placebo	>=250 mg/day	No	Yes	>=250 mg/day	No	Yes	Yes	Yes	Yes
Visit 2	2	DEPRESSION	psychological	Yes	Yes	12_007		2000					No										12	Entered	64	Female	30SEP16	134	Placebo	>=250 mg/day	No	Yes	>=250 mg/day	No	Yes	Yes	Yes	Yes
Visit 2	3	INSOMNIA	psychological	Yes	Yes	12_007		1980					No										12	Entered	64	Female	30SEP16	134	Placebo	>=250 mg/day	No	Yes	>=250 mg/day	No	Yes	Yes	Yes	Yes
Visit 2	4	ASTHMA	eyes, ears, nose, throat	Yes	Yes	12_007		2006					No										12	Entered	64	Female	30SEP16	134	Placebo	>=250 mg/day	No	Yes	>=250 mg/day	No	Yes	Yes	Yes	Yes
Visit 2	5	DYSLIPIDEMIA	endocrine	Yes	Yes	12_007		2010					No										12	Entered	64	Female	30SEP16	134	Placebo	>=250 mg/day	No	Yes	>=250 mg/day	No	Yes	Yes	Yes	Yes
Visit 2	6	OBESITY	endocrine	Yes	Yes	12_007		2014					No										12	Entered	64	Female	30SEP16	134	Placebo	>=250 mg/day	No	Yes	>=250 mg/day	No	Yes	Yes	Yes	Yes
Visit 2	7	POSTMENOPAUSAL	genital/urinary	Yes	Yes	12_007		2000					No										12	Entered	64	Female	30SEP16	134	Placebo	>=250 mg/day	No	Yes	>=250 mg/day	No	Yes	Yes	Yes	Yes
Visit 2	8	BREAST CARCINOMA IN SITU	cancer	Yes		12_007		02UNK2000		02UNK2000			No										12	Entered	64	Female	30SEP16	134	Placebo	>=250 mg/day	No	Yes	>=250 mg/day	No	Yes	Yes	Yes	Yes
Visit 2	9	LUMPECTOMY	surgeries	Yes		12_007		02UNK2000		02UNK2000			No										12	Entered	64	Female	30SEP16	134	Placebo	>=250 mg/day	No	Yes	>=250 mg/day	No	Yes	Yes	Yes	Yes
Visit 2	10	APPENDECTOMY	surgeries	Yes		12_007		1964		1964			No										12	Entered	64	Female	30SEP16	134	Placebo	>=250 mg/day	No	Yes	>=250 mg/day	No	Yes	Yes	Yes	Yes
Visit 2	11	TONSILLECTOMY	surgeries	Yes		12_007		1965		1965			No										12	Entered	64	Female	30SEP16	134	Placebo	>=250 mg/day	No	Yes	>=250 mg/day	No	Yes	Yes	Yes	Yes
Visit 2	12	ALLERGIC RHINITIS	allergies	Yes	Yes	12_007		2010					No										12	Entered	64	Female	30SEP16	134	Placebo	>=250 mg/day	No	Yes	>=250 mg/day	No	Yes	Yes	Yes	Yes
Visit 2	13	ALZHEIMER'S DISEASE	neurological	Yes	Yes	12_007		2014					No										12	Entered	64	Female	30SEP16	134	Placebo	>=250 mg/day	No	Yes	>=250 mg/day	No	Yes	Yes	Yes	Yes
Visit 2	14	OSTEOARTHRITIS	musculoskeletal	Yes	Yes	12_007		2010					No										12	Entered	64	Female	30SEP16	134	Placebo	>=250 mg/day	No	Yes	>=250 mg/day	No	Yes	Yes	Yes	Yes
Visit 1	1	DIABETES MELLITUS TYPE II	endocrine	Yes	Yes	12_009		2005				Yes		Yes	No	Yes		No			19SEP16	19SEP2016	12	Early Termination	53	Female	26OCT16	260	MF4637	>=250 mg/day	Yes	Yes	>=250 mg/day	No	Yes	Yes	Yes	Yes
Visit 1	2	HYPERTENSION	cardiovascular	Yes	Yes	12_009		2010				Yes		Yes	No	Yes		No			19SEP16	19SEP2016	12	Early Termination	53	Female	26OCT16	260	MF4637	>=250 mg/day	Yes	Yes	>=250 mg/day	No	Yes	Yes	Yes	Yes
Visit 1	3	OBESITY	endocrine	Yes	Yes	12_009		2000				Yes		Yes	No	Yes		No			19SEP16	19SEP2016	12	Early Termination	53	Female	26OCT16	260	MF4637	>=250 mg/day	Yes	Yes	>=250 mg/day	No	Yes	Yes	Yes	Yes
Visit 1	4	POSTMENOPAUSAL	genital/urinary	Yes	Yes	12_009		2011				Yes		Yes	No	Yes		No			19SEP16	19SEP2016	12	Early Termination	53	Female	26OCT16	260	MF4637	>=250 mg/day	Yes	Yes	>=250 mg/day	No	Yes	Yes	Yes	Yes
Visit 1	5	DYSLIPIDEMIA	endocrine	Yes	Yes	12_009		2014				Yes		Yes	No	Yes		No			19SEP16	19SEP2016	12	Early Termination	53	Female	26OCT16	260	MF4637	>=250 mg/day	Yes	Yes	>=250 mg/day	No	Yes	Yes	Yes	Yes
Visit 1	6	GASTRITIS	gastrointestinal	Yes	Yes	12_009		2014				Yes		Yes	No	Yes		No			19SEP16	19SEP2016	12	Early Termination	53	Female	26OCT16	260	MF4637	>=250 mg/day	Yes	Yes	>=250 mg/day	No	Yes	Yes	Yes	Yes
Visit 1	7	CHOLECYSTITIS	gastrointestinal	Yes		12_009		2001		2001		Yes		Yes	No	Yes		No			19SEP16	19SEP2016	12	Early Termination	53	Female	26OCT16	260	MF4637	>=250 mg/day	Yes	Yes	>=250 mg/day	No	Yes	Yes	Yes	Yes
Visit 1	8	CHOLECYSTECTOMY	gastrointestinal	Yes		12_009		2001		2001		Yes		Yes	No	Yes		No			19SEP16	19SEP2016	12	Early Termination	53	Female	26OCT16	260	MF4637	>=250 mg/day	Yes	Yes	>=250 mg/day	No	Yes	Yes	Yes	Yes
Visit 1	9	GASTROESOPHAGEAL REFLUX DISEASE	gastrointestinal	Yes	Yes	12_009		2014				Yes		Yes	No	Yes		No			19SEP16	19SEP2016	12	Early Termination	53	Female	26OCT16	260	MF4637	>=250 mg/day	Yes	Yes	>=250 mg/day	No	Yes	Yes	Yes	Yes
Visit 1	10	HIATAL HERNIA	gastrointestinal	Yes	Yes	12_009		2014				Yes		Yes	No	Yes		No			19SEP16	19SEP2016	12	Early Termination	53	Female	26OCT16	260	MF4637	>=250 mg/day	Yes	Yes	>=250 mg/day	No	Yes	Yes	Yes	Yes
Visit 1	11	ONYCHOMYCOSIS	dermatological	Yes	Yes	12_009	08AUG16	08AUG2016				Yes		Yes	No	Yes		No			19SEP16	19SEP2016	12	Early Termination	53	Female	26OCT16	260	MF4637	>=250 mg/day	Yes	Yes	>=250 mg/day	No	Yes	Yes	Yes	Yes
Visit 2	1	DIABETES MELLITUS TYPE II	endocrine	Yes	Yes	12_009		2005					No										12	Early Termination	53	Female	26OCT16	260	MF4637	>=250 mg/day	Yes	Yes	>=250 mg/day	No	Yes	Yes	Yes	Yes
Visit 2	2	HYPERTENSION	cardiovascular	Yes	Yes	12_009		2010					No										12	Early Termination	53	Female	26OCT16	260	MF4637	>=250 mg/day	Yes	Yes	>=250 mg/day	No	Yes	Yes	Yes	Yes
Visit 2	3	OBESITY	endocrine	Yes	Yes	12_009		2000					No										12	Early Termination	53	Female	26OCT16	260	MF4637	>=250 mg/day	Yes	Yes	>=250 mg/day	No	Yes	Yes	Yes	Yes
Visit 2	4	POSTMENOPAUSAL	genital/urinary	Yes	Yes	12_009		2011					No										12	Early Termination	53	Female	26OCT16	260	MF4637	>=250 mg/day	Yes	Yes	>=250 mg/day	No	Yes	Yes	Yes	Yes
Visit 2	5	DYSLIPIDEMIA	endocrine	Yes	Yes	12_009		2014					No										12	Early Termination	53	Female	26OCT16	260	MF4637	>=250 mg/day	Yes	Yes	>=250 mg/day	No	Yes	Yes	Yes	Yes
Visit 2	6	GASTRITIS	gastrointestinal	Yes	Yes	12_009		2014					No										12	Early Termination	53	Female	26OCT16	260	MF4637	>=250 mg/day	Yes	Yes	>=250 mg/day	No	Yes	Yes	Yes	Yes
Visit 2	7	CHOLECYSTITIS	gastrointestinal	Yes		12_009		2001		2001			No										12	Early Termination	53	Female	26OCT16	260	MF4637	>=250 mg/day	Yes	Yes	>=250 mg/day	No	Yes	Yes	Yes	Yes
Visit 2	8	CHOLECYSTECTOMY	gastrointestinal	Yes		12_009		2001		2001			No										12	Early Termination	53	Female	26OCT16	260	MF4637	>=250 mg/day	Yes	Yes	>=250 mg/day	No	Yes	Yes	Yes	Yes
Visit 2	9	GASTROESOPHAGEAL REFLUX DISEASE	gastrointestinal	Yes	Yes	12_009		2014					No										12	Early Termination	53	Female	26OCT16	260	MF4637	>=250 mg/day	Yes	Yes	>=250 mg/day	No	Yes	Yes	Yes	Yes
Visit 2	10	HIATAL HERNIA	gastrointestinal	Yes	Yes	12_009		2014					No										12	Early Termination	53	Female	26OCT16	260	MF4637	>=250 mg/day	Yes	Yes	>=250 mg/day	No	Yes	Yes	Yes	Yes
Visit 2	11	ONYCHOMYCOSIS	dermatological	Yes	Yes	12_009	08AUG16	08AUG2016					No										12	Early Termination	53	Female	26OCT16	260	MF4637	>=250 mg/day	Yes	Yes	>=250 mg/day	No	Yes	Yes	Yes	Yes
Visit 1	1	POSTMENOPAUSAL	genital/urinary	Yes	Yes	12_013		12UNK2013				No		Yes	Yes		Ultrasound	No	25APR16	25APR2016			12	Entered	52	Female	30SEP16	137	MF4637	>=250 mg/day	No	Yes	>=250 mg/day	No	Yes	Yes	Yes	Yes
Visit 1	2	EPILEPSY	neurological	Yes	Yes	12_013		1980				No		Yes	Yes		Ultrasound	No	25APR16	25APR2016			12	Entered	52	Female	30SEP16	137	MF4637	>=250 mg/day	No	Yes	>=250 mg/day	No	Yes	Yes	Yes	Yes
Visit 1	3	HYPERTENSION	cardiovascular	Yes	Yes	12_013		1983				No		Yes	Yes		Ultrasound	No	25APR16	25APR2016			12	Entered	52	Female	30SEP16	137	MF4637	>=250 mg/day	No	Yes	>=250 mg/day	No	Yes	Yes	Yes	Yes
Visit 1	4	OBESITY	endocrine	Yes	Yes	12_013		1985				No		Yes	Yes		Ultrasound	No	25APR16	25APR2016			12	Entered	52	Female	30SEP16	137	MF4637	>=250 mg/day	No	Yes	>=250 mg/day	No	Yes	Yes	Yes	Yes
Visit 1	5	DEPRESSION	psychological	Yes	Yes	12_013		1985				No		Yes	Yes		Ultrasound	No	25APR16	25APR2016			12	Entered	52	Female	30SEP16	137	MF4637	>=250 mg/day	No	Yes	>=250 mg/day	No	Yes	Yes	Yes	Yes
Visit 1	6	GENERALIZED ANXIETY DISORDER	psychological	Yes	Yes	12_013		1985				No		Yes	Yes		Ultrasound	No	25APR16	25APR2016			12	Entered	52	Female	30SEP16	137	MF4637	>=250 mg/day	No	Yes	>=250 mg/day	No	Yes	Yes	Yes	Yes
Visit 1	7	ONYCHOMYCOSIS OF FEET	dermatological	Yes	Yes	12_013		1999				No		Yes	Yes		Ultrasound	No	25APR16	25APR2016			12	Entered	52	Female	30SEP16	137	MF4637	>=250 mg/day	No	Yes	>=250 mg/day	No	Yes	Yes	Yes	Yes
Visit 2	1	POSTMENOPAUSAL	genital/urinary	Yes	Yes	12_013		12UNK2013					No										12	Entered	52	Female	30SEP16	137	MF4637	>=250 mg/day	No	Yes	>=250 mg/day	No	Yes	Yes	Yes	Yes
Visit 2	2	EPILEPSY	neurological	Yes	Yes	12_013		1980					No										12	Entered	52	Female	30SEP16	137	MF4637	>=250 mg/day	No	Yes	>=250 mg/day	No	Yes	Yes	Yes	Yes
Visit 2	3	HYPERTENSION	cardiovascular	Yes	Yes	12_013		1983					No										12	Entered	52	Female	30SEP16	137	MF4637	>=250 mg/day	No	Yes	>=250 mg/day	No	Yes	Yes	Yes	Yes
Visit 2	4	OBESITY	endocrine	Yes	Yes	12_013		1985					No										12	Entered	52	Female	30SEP16	137	MF4637	>=250 mg/day	No	Yes	>=250 mg/day	No	Yes	Yes	Yes	Yes
Visit 2	5	DEPRESSION	psychological	Yes	Yes	12_013		1985					No										12	Entered	52	Female	30SEP16	137	MF4637	>=250 mg/day	No	Yes	>=250 mg/day	No	Yes	Yes	Yes	Yes
Visit 2	6	GENERALIZED ANXIETY DISORDER	psychological	Yes	Yes	12_013		1985					No										12	Entered	52	Female	30SEP16	137	MF4637	>=250 mg/day	No	Yes	>=250 mg/day	No	Yes	Yes	Yes	Yes
Visit 2	7	ONYCHOMYCOSIS OF FEET	dermatological	Yes	Yes	12_013		1999					No										12	Entered	52	Female	30SEP16	137	MF4637	>=250 mg/day	No	Yes	>=250 mg/day	No	Yes	Yes	Yes	Yes
Visit 1	1	HYPERTENSION	cardiovascular	Yes	Yes	12_014		2006				Yes		Yes	No	Yes		No			26SEP16	26SEP2016	12	Entered	66	Female	30SEP16	136	Placebo	>=250 mg/day	Yes	Yes	>=250 mg/day	No	Yes	Yes	Yes	Yes
Visit 1	2	DYSLIPIDEMIA	endocrine	Yes	Yes	12_014		2016				Yes		Yes	No	Yes		No			26SEP16	26SEP2016	12	Entered	66	Female	30SEP16	136	Placebo	>=250 mg/day	Yes	Yes	>=250 mg/day	No	Yes	Yes	Yes	Yes
Visit 1	3	HYPOTHYROIDISM	endocrine	Yes	Yes	12_014		2010				Yes		Yes	No	Yes		No			26SEP16	26SEP2016	12	Entered	66	Female	30SEP16	136	Placebo	>=250 mg/day	Yes	Yes	>=250 mg/day	No	Yes	Yes	Yes	Yes
Visit 1	4	BRONCHIAL ASTHMA	eyes, ears, nose, throat	Yes	Yes	12_014		1986				Yes		Yes	No	Yes		No			26SEP16	26SEP2016	12	Entered	66	Female	30SEP16	136	Placebo	>=250 mg/day	Yes	Yes	>=250 mg/day	No	Yes	Yes	Yes	Yes
Visit 1	5	BILATERAL CATARACTS	eyes, ears, nose, throat	Yes		12_014		1995		1996		Yes		Yes	No	Yes		No			26SEP16	26SEP2016	12	Entered	66	Female	30SEP16	136	Placebo	>=250 mg/day	Yes	Yes	>=250 mg/day	No	Yes	Yes	Yes	Yes
Visit 1	6	BILATERAL CATARACTS SURGERY	surgeries	Yes		12_014		1996		1996		Yes		Yes	No	Yes		No			26SEP16	26SEP2016	12	Entered	66	Female	30SEP16	136	Placebo	>=250 mg/day	Yes	Yes	>=250 mg/day	No	Yes	Yes	Yes	Yes
Visit 1	7	CESAREAN SECTION	surgeries	Yes		12_014	24SEP81	24SEP1981	24SEP81	24SEP1981		Yes		Yes	No	Yes		No			26SEP16	26SEP2016	12	Entered	66	Female	30SEP16	136	Placebo	>=250 mg/day	Yes	Yes	>=250 mg/day	No	Yes	Yes	Yes	Yes
Visit 1	8	ALLERGIC RHINITIS	allergies	Yes	Yes	12_014		2006				Yes		Yes	No	Yes		No			26SEP16	26SEP2016	12	Entered	66	Female	30SEP16	136	Placebo	>=250 mg/day	Yes	Yes	>=250 mg/day	No	Yes	Yes	Yes	Yes
Visit 1	9	ALLERGY TO PENICILLIN	allergies	Yes	Yes	12_014		2001				Yes		Yes	No	Yes		No			26SEP16	26SEP2016	12	Entered	66	Female	30SEP16	136	Placebo	>=250 mg/day	Yes	Yes	>=250 mg/day	No	Yes	Yes	Yes	Yes
Visit 1	10	OSTEOARTHROSIS	musculoskeletal	Yes	Yes	12_014		2004				Yes		Yes	No	Yes		No			26SEP16	26SEP2016	12	Entered	66	Female	30SEP16	136	Placebo	>=250 mg/day	Yes	Yes	>=250 mg/day	No	Yes	Yes	Yes	Yes
Visit 1	11	VITAMIN D DEFICIENCY	endocrine	Yes	Yes	12_014		2006				Yes		Yes	No	Yes		No			26SEP16	26SEP2016	12	Entered	66	Female	30SEP16	136	Placebo	>=250 mg/day	Yes	Yes	>=250 mg/day	No	Yes	Yes	Yes	Yes
Visit 1	12	DIABETES MELLITUS TYPE II	endocrine	Yes	Yes	12_014		2015				Yes		Yes	No	Yes		No			26SEP16	26SEP2016	12	Entered	66	Female	30SEP16	136	Placebo	>=250 mg/day	Yes	Yes	>=250 mg/day	No	Yes	Yes	Yes	Yes
Visit 1	13	OVERWEIGHT	endocrine	Yes	Yes	12_014		2014				Yes		Yes	No	Yes		No			26SEP16	26SEP2016	12	Entered	66	Female	30SEP16	136	Placebo	>=250 mg/day	Yes	Yes	>=250 mg/day	No	Yes	Yes	Yes	Yes
Visit 1	14	COLONIC POLYPS	gastrointestinal	Yes		12_014		2013		2013		Yes		Yes	No	Yes		No			26SEP16	26SEP2016	12	Entered	66	Female	30SEP16	136	Placebo	>=250 mg/day	Yes	Yes	>=250 mg/day	No	Yes	Yes	Yes	Yes
Visit 1	15	COLONIC POLYPS SURGERY	gastrointestinal	Yes		12_014		2013		2013		Yes		Yes	No	Yes		No			26SEP16	26SEP2016	12	Entered	66	Female	30SEP16	136	Placebo	>=250 mg/day	Yes	Yes	>=250 mg/day	No	Yes	Yes	Yes	Yes
Visit 1	16	CARDIAC CATHETERIZATION	cardiovascular	Yes		12_014		2012		2012		Yes		Yes	No	Yes		No			26SEP16	26SEP2016	12	Entered	66	Female	30SEP16	136	Placebo	>=250 mg/day	Yes	Yes	>=250 mg/day	No	Yes	Yes	Yes	Yes
Visit 1	17	OSTEOPENIA	musculoskeletal	Yes	Yes	12_014		2015				Yes		Yes	No	Yes		No			26SEP16	26SEP2016	12	Entered	66	Female	30SEP16	136	Placebo	>=250 mg/day	Yes	Yes	>=250 mg/day	No	Yes	Yes	Yes	Yes
Visit 1	18	ANXIETY	psychological	Yes	Yes	12_014		2013				Yes		Yes	No	Yes		No			26SEP16	26SEP2016	12	Entered	66	Female	30SEP16	136	Placebo	>=250 mg/day	Yes	Yes	>=250 mg/day	No	Yes	Yes	Yes	Yes
Visit 1	19	GASTROESOPHAGEAL REFLUX DISEASE	gastrointestinal	Yes	Yes	12_014		2015				Yes		Yes	No	Yes		No			26SEP16	26SEP2016	12	Entered	66	Female	30SEP16	136	Placebo	>=250 mg/day	Yes	Yes	>=250 mg/day	No	Yes	Yes	Yes	Yes
Visit 1	20	POSTMENOPAUSAL	genital/urinary	Yes	Yes	12_014		1999				Yes		Yes	No	Yes		No			26SEP16	26SEP2016	12	Entered	66	Female	30SEP16	136	Placebo	>=250 mg/day	Yes	Yes	>=250 mg/day	No	Yes	Yes	Yes	Yes
Visit 1	21	BENIGN HYPOECHOIC SOLID NODULARITY IN RIGHT HEPATIC LOBE	liver	Yes	Yes	12_014	28SEP16	28SEP2016				Yes		Yes	No	Yes		No			26SEP16	26SEP2016	12	Entered	66	Female	30SEP16	136	Placebo	>=250 mg/day	Yes	Yes	>=250 mg/day	No	Yes	Yes	Yes	Yes
Visit 2	1	HYPERTENSION	cardiovascular	Yes	Yes	12_014		2006					No										12	Entered	66	Female	30SEP16	136	Placebo	>=250 mg/day	Yes	Yes	>=250 mg/day	No	Yes	Yes	Yes	Yes
Visit 2	2	DYSLIPIDEMIA	endocrine	Yes	Yes	12_014		2016					No										12	Entered	66	Female	30SEP16	136	Placebo	>=250 mg/day	Yes	Yes	>=250 mg/day	No	Yes	Yes	Yes	Yes
Visit 2	3	HYPOTHYROIDISM	endocrine	Yes	Yes	12_014		2010					No										12	Entered	66	Female	30SEP16	136	Placebo	>=250 mg/day	Yes	Yes	>=250 mg/day	No	Yes	Yes	Yes	Yes
Visit 2	4	BRONCHIAL ASTHMA	eyes, ears, nose, throat	Yes	Yes	12_014		1986					No										12	Entered	66	Female	30SEP16	136	Placebo	>=250 mg/day	Yes	Yes	>=250 mg/day	No	Yes	Yes	Yes	Yes
Visit 2	5	BILATERAL CATARACTS	eyes, ears, nose, throat	Yes		12_014		1995		1996			No										12	Entered	66	Female	30SEP16	136	Placebo	>=250 mg/day	Yes	Yes	>=250 mg/day	No	Yes	Yes	Yes	Yes
Visit 2	6	BILATERAL CATARACTS SURGERY	surgeries	Yes		12_014		1996		1996			No										12	Entered	66	Female	30SEP16	136	Placebo	>=250 mg/day	Yes	Yes	>=250 mg/day	No	Yes	Yes	Yes	Yes
Visit 2	7	CESAREAN SECTION	surgeries	Yes		12_014	24SEP81	24SEP1981	24SEP81	24SEP1981			No										12	Entered	66	Female	30SEP16	136	Placebo	>=250 mg/day	Yes	Yes	>=250 mg/day	No	Yes	Yes	Yes	Yes
Visit 2	8	ALLERGIC RHINITIS	allergies	Yes	Yes	12_014		2006					No										12	Entered	66	Female	30SEP16	136	Placebo	>=250 mg/day	Yes	Yes	>=250 mg/day	No	Yes	Yes	Yes	Yes
Visit 2	9	ALLERGY TO PENICILLIN	allergies	Yes	Yes	12_014		2001					No										12	Entered	66	Female	30SEP16	136	Placebo	>=250 mg/day	Yes	Yes	>=250 mg/day	No	Yes	Yes	Yes	Yes
Visit 2	10	OSTEOARTHROSIS	musculoskeletal	Yes	Yes	12_014		2004					No										12	Entered	66	Female	30SEP16	136	Placebo	>=250 mg/day	Yes	Yes	>=250 mg/day	No	Yes	Yes	Yes	Yes
Visit 2	11	VITAMIN D DEFICIENCY	endocrine	Yes	Yes	12_014		2006					No										12	Entered	66	Female	30SEP16	136	Placebo	>=250 mg/day	Yes	Yes	>=250 mg/day	No	Yes	Yes	Yes	Yes
Visit 2	12	DIABETES MELLITUS TYPE II	endocrine	Yes	Yes	12_014		2015					No										12	Entered	66	Female	30SEP16	136	Placebo	>=250 mg/day	Yes	Yes	>=250 mg/day	No	Yes	Yes	Yes	Yes
Visit 2	13	OVERWEIGHT	endocrine	Yes	Yes	12_014		2014					No										12	Entered	66	Female	30SEP16	136	Placebo	>=250 mg/day	Yes	Yes	>=250 mg/day	No	Yes	Yes	Yes	Yes
Visit 2	14	COLONIC POLYPS	gastrointestinal	Yes		12_014		2013		2013			No										12	Entered	66	Female	30SEP16	136	Placebo	>=250 mg/day	Yes	Yes	>=250 mg/day	No	Yes	Yes	Yes	Yes
Visit 2	15	COLONIC POLYPS SURGERY	gastrointestinal	Yes		12_014		2013		2013			No										12	Entered	66	Female	30SEP16	136	Placebo	>=250 mg/day	Yes	Yes	>=250 mg/day	No	Yes	Yes	Yes	Yes
Visit 2	16	CARDIAC CATHETERIZATION	cardiovascular	Yes		12_014		2012		2012			No										12	Entered	66	Female	30SEP16	136	Placebo	>=250 mg/day	Yes	Yes	>=250 mg/day	No	Yes	Yes	Yes	Yes
Visit 2	17	OSTEOPENIA	musculoskeletal	Yes	Yes	12_014		2015					No										12	Entered	66	Female	30SEP16	136	Placebo	>=250 mg/day	Yes	Yes	>=250 mg/day	No	Yes	Yes	Yes	Yes
Visit 2	18	ANXIETY	psychological	Yes	Yes	12_014		2013					No										12	Entered	66	Female	30SEP16	136	Placebo	>=250 mg/day	Yes	Yes	>=250 mg/day	No	Yes	Yes	Yes	Yes
Visit 2	19	GASTROESOPHAGEAL REFLUX DISEASE	gastrointestinal	Yes	Yes	12_014		2015					No										12	Entered	66	Female	30SEP16	136	Placebo	>=250 mg/day	Yes	Yes	>=250 mg/day	No	Yes	Yes	Yes	Yes
Visit 2	20	POSTMENOPAUSAL	genital/urinary	Yes	Yes	12_014		1999					No										12	Entered	66	Female	30SEP16	136	Placebo	>=250 mg/day	Yes	Yes	>=250 mg/day	No	Yes	Yes	Yes	Yes
Visit 2	21	BENIGN HYPOECHOIC SOLID NODULARITY IN RIGHT HEPATIC LOBE	liver	Yes	Yes	12_014	28SEP16	28SEP2016					No										12	Entered	66	Female	30SEP16	136	Placebo	>=250 mg/day	Yes	Yes	>=250 mg/day	No	Yes	Yes	Yes	Yes
Visit 1	1	OBESITY	endocrine	Yes	Yes	12_015	01MAR05	01MAR2005				Yes		Yes	No	Yes		No			26SEP16	26SEP2016	12	Early Termination	47	Female	30SEP16	135	MF4637	>=250 mg/day	Yes	Yes	>=250 mg/day	No	Yes	Yes	Yes	Yes
Visit 1	2	DIABETES MELLITUS TYPE II	endocrine	Yes	Yes	12_015	01FEB14	01FEB2014				Yes		Yes	No	Yes		No			26SEP16	26SEP2016	12	Early Termination	47	Female	30SEP16	135	MF4637	>=250 mg/day	Yes	Yes	>=250 mg/day	No	Yes	Yes	Yes	Yes
Visit 1	3	HYPERTENSION	cardiovascular	Yes	Yes	12_015	01JUN11	01JUN2011				Yes		Yes	No	Yes		No			26SEP16	26SEP2016	12	Early Termination	47	Female	30SEP16	135	MF4637	>=250 mg/day	Yes	Yes	>=250 mg/day	No	Yes	Yes	Yes	Yes
Visit 1	4	DYSLIPIDEMIA	endocrine	Yes	Yes	12_015	01SEP09	01SEP2009				Yes		Yes	No	Yes		No			26SEP16	26SEP2016	12	Early Termination	47	Female	30SEP16	135	MF4637	>=250 mg/day	Yes	Yes	>=250 mg/day	No	Yes	Yes	Yes	Yes
Visit 1	5	CESAREAN SECTION	surgeries	Yes		12_015	10DEC83	10DEC1983	10DEC83	10DEC1983		Yes		Yes	No	Yes		No			26SEP16	26SEP2016	12	Early Termination	47	Female	30SEP16	135	MF4637	>=250 mg/day	Yes	Yes	>=250 mg/day	No	Yes	Yes	Yes	Yes
Visit 1	6	CESAREAN SECTION	surgeries	Yes		12_015	26JUN90	26JUN1990	26JUN90	26JUN1990		Yes		Yes	No	Yes		No			26SEP16	26SEP2016	12	Early Termination	47	Female	30SEP16	135	MF4637	>=250 mg/day	Yes	Yes	>=250 mg/day	No	Yes	Yes	Yes	Yes
Visit 1	7	BILATERAL TUBAL LIGATION	surgeries	Yes		12_015	26JUN90	26JUN1990	26JUN90	26JUN1990		Yes		Yes	No	Yes		No			26SEP16	26SEP2016	12	Early Termination	47	Female	30SEP16	135	MF4637	>=250 mg/day	Yes	Yes	>=250 mg/day	No	Yes	Yes	Yes	Yes
Visit 2	1	OBESITY	endocrine	Yes	Yes	12_015	01MAR05	01MAR2005					No										12	Early Termination	47	Female	30SEP16	135	MF4637	>=250 mg/day	Yes	Yes	>=250 mg/day	No	Yes	Yes	Yes	Yes
Visit 2	2	DIABETES MELLITUS TYPE II	endocrine	Yes	Yes	12_015	01FEB14	01FEB2014					No										12	Early Termination	47	Female	30SEP16	135	MF4637	>=250 mg/day	Yes	Yes	>=250 mg/day	No	Yes	Yes	Yes	Yes
Visit 2	3	HYPERTENSION	cardiovascular	Yes	Yes	12_015	01JUN11	01JUN2011					No										12	Early Termination	47	Female	30SEP16	135	MF4637	>=250 mg/day	Yes	Yes	>=250 mg/day	No	Yes	Yes	Yes	Yes
Visit 2	4	DYSLIPIDEMIA	endocrine	Yes	Yes	12_015	01SEP09	01SEP2009					No										12	Early Termination	47	Female	30SEP16	135	MF4637	>=250 mg/day	Yes	Yes	>=250 mg/day	No	Yes	Yes	Yes	Yes
Visit 2	5	CESAREAN SECTION	surgeries	Yes		12_015	10DEC83	10DEC1983	10DEC83	10DEC1983			No										12	Early Termination	47	Female	30SEP16	135	MF4637	>=250 mg/day	Yes	Yes	>=250 mg/day	No	Yes	Yes	Yes	Yes
Visit 2	6	CESAREAN SECTION	surgeries	Yes		12_015	26JUN90	26JUN1990	26JUN90	26JUN1990			No										12	Early Termination	47	Female	30SEP16	135	MF4637	>=250 mg/day	Yes	Yes	>=250 mg/day	No	Yes	Yes	Yes	Yes
Visit 2	7	BILATERAL TUBAL LIGATION	surgeries	Yes		12_015	26JUN90	26JUN1990	26JUN90	26JUN1990			No										12	Early Termination	47	Female	30SEP16	135	MF4637	>=250 mg/day	Yes	Yes	>=250 mg/day	No	Yes	Yes	Yes	Yes
Visit 1	1	POSTMENOPAUSAL	genital/urinary	Yes	Yes	12_016		2008				No		Yes	Yes		Ultrasound	No		2015			12	Entered	52	Female	05OCT16	103	MF4637	<250 mg/day	No	No	<250 mg/day	No	Yes	Yes	Yes	Yes
Visit 1	2	ABDOMINAL TRAUMA	gastrointestinal	Yes		12_016		1986		1986		No		Yes	Yes		Ultrasound	No		2015			12	Entered	52	Female	05OCT16	103	MF4637	<250 mg/day	No	No	<250 mg/day	No	Yes	Yes	Yes	Yes
Visit 1	3	SPLENECTOMY	surgeries	Yes		12_016		1986		1986		No		Yes	Yes		Ultrasound	No		2015			12	Entered	52	Female	05OCT16	103	MF4637	<250 mg/day	No	No	<250 mg/day	No	Yes	Yes	Yes	Yes
Visit 1	4	DYSLIPIDEMIA	endocrine	Yes	Yes	12_016		2016				No		Yes	Yes		Ultrasound	No		2015			12	Entered	52	Female	05OCT16	103	MF4637	<250 mg/day	No	No	<250 mg/day	No	Yes	Yes	Yes	Yes
Visit 1	5	FATTY LIVER	liver	Yes	Yes	12_016		2015				No		Yes	Yes		Ultrasound	No		2015			12	Entered	52	Female	05OCT16	103	MF4637	<250 mg/day	No	No	<250 mg/day	No	Yes	Yes	Yes	Yes
Visit 1	6	SPINA BIFIDA	musculoskeletal	Yes	Yes	12_016		1963				No		Yes	Yes		Ultrasound	No		2015			12	Entered	52	Female	05OCT16	103	MF4637	<250 mg/day	No	No	<250 mg/day	No	Yes	Yes	Yes	Yes
Visit 1	7	DEPRESSION	psychological	Yes	Yes	12_016		1975				No		Yes	Yes		Ultrasound	No		2015			12	Entered	52	Female	05OCT16	103	MF4637	<250 mg/day	No	No	<250 mg/day	No	Yes	Yes	Yes	Yes
Visit 1	8	ANXIETY	psychological	Yes	Yes	12_016		2010				No		Yes	Yes		Ultrasound	No		2015			12	Entered	52	Female	05OCT16	103	MF4637	<250 mg/day	No	No	<250 mg/day	No	Yes	Yes	Yes	Yes
Visit 1	9	SCHIZOPHRENIA	psychological	Yes	Yes	12_016		1975				No		Yes	Yes		Ultrasound	No		2015			12	Entered	52	Female	05OCT16	103	MF4637	<250 mg/day	No	No	<250 mg/day	No	Yes	Yes	Yes	Yes
Visit 1	10	IDIOPATHIC PREIPHERAL NEUROPATHY	neurological	Yes	Yes	12_016		2010				No		Yes	Yes		Ultrasound	No		2015			12	Entered	52	Female	05OCT16	103	MF4637	<250 mg/day	No	No	<250 mg/day	No	Yes	Yes	Yes	Yes
Visit 1	11	OVERWEIGHT	endocrine	Yes	Yes	12_016		2008				No		Yes	Yes		Ultrasound	No		2015			12	Entered	52	Female	05OCT16	103	MF4637	<250 mg/day	No	No	<250 mg/day	No	Yes	Yes	Yes	Yes
Visit 1	12	CHOLECYSTITIS	gastrointestinal	Yes		12_016		2008		2008		No		Yes	Yes		Ultrasound	No		2015			12	Entered	52	Female	05OCT16	103	MF4637	<250 mg/day	No	No	<250 mg/day	No	Yes	Yes	Yes	Yes
Visit 1	13	CHOLECYSTECTOMY	surgeries	Yes		12_016		2008		2008		No		Yes	Yes		Ultrasound	No		2015			12	Entered	52	Female	05OCT16	103	MF4637	<250 mg/day	No	No	<250 mg/day	No	Yes	Yes	Yes	Yes
Visit 1	14	UTERINE FIBROID	genital/urinary	Yes		12_016		2010		2010		No		Yes	Yes		Ultrasound	No		2015			12	Entered	52	Female	05OCT16	103	MF4637	<250 mg/day	No	No	<250 mg/day	No	Yes	Yes	Yes	Yes
Visit 1	15	TOTAL HYSTERECTOMY	surgeries	Yes		12_016		2010		2010		No		Yes	Yes		Ultrasound	No		2015			12	Entered	52	Female	05OCT16	103	MF4637	<250 mg/day	No	No	<250 mg/day	No	Yes	Yes	Yes	Yes
Visit 1	16	BRONCHIAL ASTHMA	eyes, ears, nose, throat	Yes	Yes	12_016		1968				No		Yes	Yes		Ultrasound	No		2015			12	Entered	52	Female	05OCT16	103	MF4637	<250 mg/day	No	No	<250 mg/day	No	Yes	Yes	Yes	Yes
Visit 1	17	ALLERGY TO ASPIRIN	allergies	Yes	Yes	12_016		2012				No		Yes	Yes		Ultrasound	No		2015			12	Entered	52	Female	05OCT16	103	MF4637	<250 mg/day	No	No	<250 mg/day	No	Yes	Yes	Yes	Yes
Visit 1	18	GASTROESOPHAGEAL RELFUX DISEASE	gastrointestinal	Yes	Yes	12_016		2016				No		Yes	Yes		Ultrasound	No		2015			12	Entered	52	Female	05OCT16	103	MF4637	<250 mg/day	No	No	<250 mg/day	No	Yes	Yes	Yes	Yes
Visit 2	1	POSTMENOPAUSAL	genital/urinary	Yes	Yes	12_016		2008					No										12	Entered	52	Female	05OCT16	103	MF4637	<250 mg/day	No	No	<250 mg/day	No	Yes	Yes	Yes	Yes
Visit 2	2	ABDOMINAL TRAUMA	gastrointestinal	Yes		12_016		1986		1986			No										12	Entered	52	Female	05OCT16	103	MF4637	<250 mg/day	No	No	<250 mg/day	No	Yes	Yes	Yes	Yes
Visit 2	3	SPLENECTOMY	surgeries	Yes		12_016		1986		1986			No										12	Entered	52	Female	05OCT16	103	MF4637	<250 mg/day	No	No	<250 mg/day	No	Yes	Yes	Yes	Yes
Visit 2	4	DYSLIPIDEMIA	endocrine	Yes	Yes	12_016		2016					No										12	Entered	52	Female	05OCT16	103	MF4637	<250 mg/day	No	No	<250 mg/day	No	Yes	Yes	Yes	Yes
Visit 2	5	FATTY LIVER	liver	Yes	Yes	12_016		2015					No										12	Entered	52	Female	05OCT16	103	MF4637	<250 mg/day	No	No	<250 mg/day	No	Yes	Yes	Yes	Yes
Visit 2	6	SPINA BIFIDA	musculoskeletal	Yes	Yes	12_016		1963					No										12	Entered	52	Female	05OCT16	103	MF4637	<250 mg/day	No	No	<250 mg/day	No	Yes	Yes	Yes	Yes
Visit 2	7	DEPRESSION	psychological	Yes	Yes	12_016		1975					No										12	Entered	52	Female	05OCT16	103	MF4637	<250 mg/day	No	No	<250 mg/day	No	Yes	Yes	Yes	Yes
Visit 2	8	ANXIETY	psychological	Yes	Yes	12_016		2010					No										12	Entered	52	Female	05OCT16	103	MF4637	<250 mg/day	No	No	<250 mg/day	No	Yes	Yes	Yes	Yes
Visit 2	9	SCHIZOPHRENIA	psychological	Yes	Yes	12_016		1975					No										12	Entered	52	Female	05OCT16	103	MF4637	<250 mg/day	No	No	<250 mg/day	No	Yes	Yes	Yes	Yes
Visit 2	10	IDIOPATHIC PREIPHERAL NEUROPATHY	neurological	Yes	Yes	12_016		2010					No										12	Entered	52	Female	05OCT16	103	MF4637	<250 mg/day	No	No	<250 mg/day	No	Yes	Yes	Yes	Yes
Visit 2	11	OVERWEIGHT	endocrine	Yes	Yes	12_016		2008					No										12	Entered	52	Female	05OCT16	103	MF4637	<250 mg/day	No	No	<250 mg/day	No	Yes	Yes	Yes	Yes
Visit 2	12	CHOLECYSTITIS	gastrointestinal	Yes		12_016		2008		2008			No										12	Entered	52	Female	05OCT16	103	MF4637	<250 mg/day	No	No	<250 mg/day	No	Yes	Yes	Yes	Yes
Visit 2	13	CHOLECYSTECTOMY	surgeries	Yes		12_016		2008		2008			No										12	Entered	52	Female	05OCT16	103	MF4637	<250 mg/day	No	No	<250 mg/day	No	Yes	Yes	Yes	Yes
Visit 2	14	UTERINE FIBROID	genital/urinary	Yes		12_016		2010		2010			No										12	Entered	52	Female	05OCT16	103	MF4637	<250 mg/day	No	No	<250 mg/day	No	Yes	Yes	Yes	Yes
Visit 2	15	TOTAL HYSTERECTOMY	surgeries	Yes		12_016		2010		2010			No										12	Entered	52	Female	05OCT16	103	MF4637	<250 mg/day	No	No	<250 mg/day	No	Yes	Yes	Yes	Yes
Visit 2	16	BRONCHIAL ASTHMA	eyes, ears, nose, throat	Yes	Yes	12_016		1968					No										12	Entered	52	Female	05OCT16	103	MF4637	<250 mg/day	No	No	<250 mg/day	No	Yes	Yes	Yes	Yes
Visit 2	17	ALLERGY TO ASPIRIN	allergies	Yes	Yes	12_016		2012					No										12	Entered	52	Female	05OCT16	103	MF4637	<250 mg/day	No	No	<250 mg/day	No	Yes	Yes	Yes	Yes
Visit 2	18	GASTROESOPHAGEAL RELFUX DISEASE	gastrointestinal	Yes	Yes	12_016		2016					No										12	Entered	52	Female	05OCT16	103	MF4637	<250 mg/day	No	No	<250 mg/day	No	Yes	Yes	Yes	Yes
Visit 1	1	DIABETES MELLITUS TYPE II	endocrine	Yes	Yes	12_017		2013				Yes		Yes	No	Yes		No			27SEP16	27SEP2016	12	Entered	57	Female	05OCT16	100	Placebo	>=250 mg/day	Yes	Yes	>=250 mg/day	No	Yes	Yes	Yes	Yes
Visit 1	2	HYPERTENSION	cardiovascular	Yes	Yes	12_017		2013				Yes		Yes	No	Yes		No			27SEP16	27SEP2016	12	Entered	57	Female	05OCT16	100	Placebo	>=250 mg/day	Yes	Yes	>=250 mg/day	No	Yes	Yes	Yes	Yes
Visit 1	3	DYSLIPIDEMIA	endocrine	Yes	Yes	12_017		2014				Yes		Yes	No	Yes		No			27SEP16	27SEP2016	12	Entered	57	Female	05OCT16	100	Placebo	>=250 mg/day	Yes	Yes	>=250 mg/day	No	Yes	Yes	Yes	Yes
Visit 1	4	VITAMIN D DEFICIENCY	endocrine	Yes	Yes	12_017		06UNK2016				Yes		Yes	No	Yes		No			27SEP16	27SEP2016	12	Entered	57	Female	05OCT16	100	Placebo	>=250 mg/day	Yes	Yes	>=250 mg/day	No	Yes	Yes	Yes	Yes
Visit 1	5	OBESITY	endocrine	Yes	Yes	12_017		1999				Yes		Yes	No	Yes		No			27SEP16	27SEP2016	12	Entered	57	Female	05OCT16	100	Placebo	>=250 mg/day	Yes	Yes	>=250 mg/day	No	Yes	Yes	Yes	Yes
Visit 1	6	POSTMENOPAUSAL	genital/urinary	Yes	Yes	12_017		2010				Yes		Yes	No	Yes		No			27SEP16	27SEP2016	12	Entered	57	Female	05OCT16	100	Placebo	>=250 mg/day	Yes	Yes	>=250 mg/day	No	Yes	Yes	Yes	Yes
Visit 1	7	HEMORRHOIDS	gastrointestinal	Yes		12_017		1996		1996		Yes		Yes	No	Yes		No			27SEP16	27SEP2016	12	Entered	57	Female	05OCT16	100	Placebo	>=250 mg/day	Yes	Yes	>=250 mg/day	No	Yes	Yes	Yes	Yes
Visit 1	8	HEMORRHOIDECTOMY	gastrointestinal	Yes		12_017		1996		1996		Yes		Yes	No	Yes		No			27SEP16	27SEP2016	12	Entered	57	Female	05OCT16	100	Placebo	>=250 mg/day	Yes	Yes	>=250 mg/day	No	Yes	Yes	Yes	Yes
Visit 2	1	DIABETES MELLITUS TYPE II	endocrine	Yes	Yes	12_017		2013					No										12	Entered	57	Female	05OCT16	100	Placebo	>=250 mg/day	Yes	Yes	>=250 mg/day	No	Yes	Yes	Yes	Yes
Visit 2	2	HYPERTENSION	cardiovascular	Yes	Yes	12_017		2013					No										12	Entered	57	Female	05OCT16	100	Placebo	>=250 mg/day	Yes	Yes	>=250 mg/day	No	Yes	Yes	Yes	Yes
Visit 2	3	DYSLIPIDEMIA	endocrine	Yes	Yes	12_017		2014					No										12	Entered	57	Female	05OCT16	100	Placebo	>=250 mg/day	Yes	Yes	>=250 mg/day	No	Yes	Yes	Yes	Yes
Visit 2	4	VITAMIN D DEFICIENCY	endocrine	Yes	Yes	12_017		06UNK2016					No										12	Entered	57	Female	05OCT16	100	Placebo	>=250 mg/day	Yes	Yes	>=250 mg/day	No	Yes	Yes	Yes	Yes
Visit 2	5	OBESITY	endocrine	Yes	Yes	12_017		1999					No										12	Entered	57	Female	05OCT16	100	Placebo	>=250 mg/day	Yes	Yes	>=250 mg/day	No	Yes	Yes	Yes	Yes
Visit 2	6	POSTMENOPAUSAL	genital/urinary	Yes	Yes	12_017		2010					No										12	Entered	57	Female	05OCT16	100	Placebo	>=250 mg/day	Yes	Yes	>=250 mg/day	No	Yes	Yes	Yes	Yes
Visit 2	7	HEMORRHOIDS	gastrointestinal	Yes		12_017		1996		1996			No										12	Entered	57	Female	05OCT16	100	Placebo	>=250 mg/day	Yes	Yes	>=250 mg/day	No	Yes	Yes	Yes	Yes
Visit 2	8	HEMORRHOIDECTOMY	gastrointestinal	Yes		12_017		1996		1996			No										12	Entered	57	Female	05OCT16	100	Placebo	>=250 mg/day	Yes	Yes	>=250 mg/day	No	Yes	Yes	Yes	Yes
Visit 1	1	DIABETES MELLITUS TYPE II	endocrine	Yes	Yes	12_019		2005				Yes		Yes	No	Yes		No			28SEP16	28SEP2016	12	Entered	53	Male	05OCT16	102	Placebo	<250 mg/day	Yes	Yes	<250 mg/day	No	Yes	Yes	Yes	Yes
Visit 1	2	HYPERTENSION	cardiovascular	Yes	Yes	12_019		2005				Yes		Yes	No	Yes		No			28SEP16	28SEP2016	12	Entered	53	Male	05OCT16	102	Placebo	<250 mg/day	Yes	Yes	<250 mg/day	No	Yes	Yes	Yes	Yes
Visit 1	3	DYSLIPIDEMIA	endocrine	Yes	Yes	12_019		2005				Yes		Yes	No	Yes		No			28SEP16	28SEP2016	12	Entered	53	Male	05OCT16	102	Placebo	<250 mg/day	Yes	Yes	<250 mg/day	No	Yes	Yes	Yes	Yes
Visit 1	4	EPILEPSY	neurological	Yes	Yes	12_019		1983				Yes		Yes	No	Yes		No			28SEP16	28SEP2016	12	Entered	53	Male	05OCT16	102	Placebo	<250 mg/day	Yes	Yes	<250 mg/day	No	Yes	Yes	Yes	Yes
Visit 1	5	GASTROESOPHAGEAL REFLUX DISEASE	gastrointestinal	Yes	Yes	12_019		2006				Yes		Yes	No	Yes		No			28SEP16	28SEP2016	12	Entered	53	Male	05OCT16	102	Placebo	<250 mg/day	Yes	Yes	<250 mg/day	No	Yes	Yes	Yes	Yes
Visit 1	6	DEPRESSION	psychological	Yes	Yes	12_019		2008				Yes		Yes	No	Yes		No			28SEP16	28SEP2016	12	Entered	53	Male	05OCT16	102	Placebo	<250 mg/day	Yes	Yes	<250 mg/day	No	Yes	Yes	Yes	Yes
Visit 1	7	ALLERGY TO PENICILLIN	allergies	Yes	Yes	12_019		1991				Yes		Yes	No	Yes		No			28SEP16	28SEP2016	12	Entered	53	Male	05OCT16	102	Placebo	<250 mg/day	Yes	Yes	<250 mg/day	No	Yes	Yes	Yes	Yes
Visit 1	8	ALLERGY TO IODINE	allergies	Yes	Yes	12_019		2016				Yes		Yes	No	Yes		No			28SEP16	28SEP2016	12	Entered	53	Male	05OCT16	102	Placebo	<250 mg/day	Yes	Yes	<250 mg/day	No	Yes	Yes	Yes	Yes
Visit 1	9	BILATERAL CATARACTS	eyes, ears, nose, throat	Yes		12_019		2015		2015		Yes		Yes	No	Yes		No			28SEP16	28SEP2016	12	Entered	53	Male	05OCT16	102	Placebo	<250 mg/day	Yes	Yes	<250 mg/day	No	Yes	Yes	Yes	Yes
Visit 1	10	BILATERAL CATARACTS SURGERY	surgeries	Yes		12_019		2015		2015		Yes		Yes	No	Yes		No			28SEP16	28SEP2016	12	Entered	53	Male	05OCT16	102	Placebo	<250 mg/day	Yes	Yes	<250 mg/day	No	Yes	Yes	Yes	Yes
Visit 1	11	STROKE	neurological	Yes	No	12_019		2014				Yes		Yes	No	Yes		No			28SEP16	28SEP2016	12	Entered	53	Male	05OCT16	102	Placebo	<250 mg/day	Yes	Yes	<250 mg/day	No	Yes	Yes	Yes	Yes
Visit 1	12	RIGHT HEMIPLEGIA	neurological	Yes	Yes	12_019		2014				Yes		Yes	No	Yes		No			28SEP16	28SEP2016	12	Entered	53	Male	05OCT16	102	Placebo	<250 mg/day	Yes	Yes	<250 mg/day	No	Yes	Yes	Yes	Yes
Visit 1	13	OBESITY	endocrine	Yes	Yes	12_019		2000				Yes		Yes	No	Yes		No			28SEP16	28SEP2016	12	Entered	53	Male	05OCT16	102	Placebo	<250 mg/day	Yes	Yes	<250 mg/day	No	Yes	Yes	Yes	Yes
Visit 1	14	SCHIZOPHRENIA	psychological	Yes	Yes	12_019		1983				Yes		Yes	No	Yes		No			28SEP16	28SEP2016	12	Entered	53	Male	05OCT16	102	Placebo	<250 mg/day	Yes	Yes	<250 mg/day	No	Yes	Yes	Yes	Yes
Visit 1	15	CRYPTORCHID SURGERY	genital/urinary	Yes		12_019		1978		1978		Yes		Yes	No	Yes		No			28SEP16	28SEP2016	12	Entered	53	Male	05OCT16	102	Placebo	<250 mg/day	Yes	Yes	<250 mg/day	No	Yes	Yes	Yes	Yes
Visit 1	16	OSTEOARTHROSIS	musculoskeletal	Yes	Yes	12_019		2014				Yes		Yes	No	Yes		No			28SEP16	28SEP2016	12	Entered	53	Male	05OCT16	102	Placebo	<250 mg/day	Yes	Yes	<250 mg/day	No	Yes	Yes	Yes	Yes
Visit 1	17	CRYPTORCHIDISM	genital/urinary	Yes		12_019		1964		1978		Yes		Yes	No	Yes		No			28SEP16	28SEP2016	12	Entered	53	Male	05OCT16	102	Placebo	<250 mg/day	Yes	Yes	<250 mg/day	No	Yes	Yes	Yes	Yes
Visit 2	1	DIABETES MELLITUS TYPE II	endocrine	Yes	Yes	12_019		2005					No										12	Entered	53	Male	05OCT16	102	Placebo	<250 mg/day	Yes	Yes	<250 mg/day	No	Yes	Yes	Yes	Yes
Visit 2	2	HYPERTENSION	cardiovascular	Yes	Yes	12_019		2005					No										12	Entered	53	Male	05OCT16	102	Placebo	<250 mg/day	Yes	Yes	<250 mg/day	No	Yes	Yes	Yes	Yes
Visit 2	3	DYSLIPIDEMIA	endocrine	Yes	Yes	12_019		2005					No										12	Entered	53	Male	05OCT16	102	Placebo	<250 mg/day	Yes	Yes	<250 mg/day	No	Yes	Yes	Yes	Yes
Visit 2	4	EPILEPSY	neurological	Yes	Yes	12_019		1983					No										12	Entered	53	Male	05OCT16	102	Placebo	<250 mg/day	Yes	Yes	<250 mg/day	No	Yes	Yes	Yes	Yes
Visit 2	5	GASTROESOPHAGEAL REFLUX DISEASE	gastrointestinal	Yes	Yes	12_019		2006					No										12	Entered	53	Male	05OCT16	102	Placebo	<250 mg/day	Yes	Yes	<250 mg/day	No	Yes	Yes	Yes	Yes
Visit 2	6	DEPRESSION	psychological	Yes	Yes	12_019		2008					No										12	Entered	53	Male	05OCT16	102	Placebo	<250 mg/day	Yes	Yes	<250 mg/day	No	Yes	Yes	Yes	Yes
Visit 2	7	ALLERGY TO PENICILLIN	allergies	Yes	Yes	12_019		1991					No										12	Entered	53	Male	05OCT16	102	Placebo	<250 mg/day	Yes	Yes	<250 mg/day	No	Yes	Yes	Yes	Yes
Visit 2	8	ALLERGY TO IODINE	allergies	Yes	Yes	12_019		2016					No										12	Entered	53	Male	05OCT16	102	Placebo	<250 mg/day	Yes	Yes	<250 mg/day	No	Yes	Yes	Yes	Yes
Visit 2	9	BILATERAL CATARACTS	eyes, ears, nose, throat	Yes		12_019		2015		2015			No										12	Entered	53	Male	05OCT16	102	Placebo	<250 mg/day	Yes	Yes	<250 mg/day	No	Yes	Yes	Yes	Yes
Visit 2	10	BILATERAL CATARACTS SURGERY	surgeries	Yes		12_019		2015		2015			No										12	Entered	53	Male	05OCT16	102	Placebo	<250 mg/day	Yes	Yes	<250 mg/day	No	Yes	Yes	Yes	Yes
Visit 2	11	STROKE	neurological	Yes	No	12_019		2014					No										12	Entered	53	Male	05OCT16	102	Placebo	<250 mg/day	Yes	Yes	<250 mg/day	No	Yes	Yes	Yes	Yes
Visit 2	12	RIGHT HEMIPLEGIA	neurological	Yes	Yes	12_019		2014					No										12	Entered	53	Male	05OCT16	102	Placebo	<250 mg/day	Yes	Yes	<250 mg/day	No	Yes	Yes	Yes	Yes
Visit 2	13	OBESITY	endocrine	Yes	Yes	12_019		2000					No										12	Entered	53	Male	05OCT16	102	Placebo	<250 mg/day	Yes	Yes	<250 mg/day	No	Yes	Yes	Yes	Yes
Visit 2	14	SCHIZOPHRENIA	psychological	Yes	Yes	12_019		1983					No										12	Entered	53	Male	05OCT16	102	Placebo	<250 mg/day	Yes	Yes	<250 mg/day	No	Yes	Yes	Yes	Yes
Visit 2	15	CRYPTORCHID SURGERY	genital/urinary	Yes		12_019		1978		1978			No										12	Entered	53	Male	05OCT16	102	Placebo	<250 mg/day	Yes	Yes	<250 mg/day	No	Yes	Yes	Yes	Yes
Visit 2	16	OSTEOARTHROSIS	musculoskeletal	Yes	Yes	12_019		2014					No										12	Entered	53	Male	05OCT16	102	Placebo	<250 mg/day	Yes	Yes	<250 mg/day	No	Yes	Yes	Yes	Yes
Visit 1	1	DIABETES MELLITUS TYPE II	endocrine	Yes	Yes	12_020		1980				Yes		Yes	No	Yes		No			29SEP16	29SEP2016	12	Entered	60	Female	05OCT16	101	MF4637	>=250 mg/day	Yes	Yes	>=250 mg/day	No	Yes	Yes	Yes	Yes
Visit 1	2	HYPERTENSION	cardiovascular	Yes	Yes	12_020		1980				Yes		Yes	No	Yes		No			29SEP16	29SEP2016	12	Entered	60	Female	05OCT16	101	MF4637	>=250 mg/day	Yes	Yes	>=250 mg/day	No	Yes	Yes	Yes	Yes
Visit 1	3	DYSLIPIDEMIA	endocrine	Yes	Yes	12_020		2011				Yes		Yes	No	Yes		No			29SEP16	29SEP2016	12	Entered	60	Female	05OCT16	101	MF4637	>=250 mg/day	Yes	Yes	>=250 mg/day	No	Yes	Yes	Yes	Yes
Visit 1	4	OVERWEIGHT	endocrine	Yes	Yes	12_020		2015				Yes		Yes	No	Yes		No			29SEP16	29SEP2016	12	Entered	60	Female	05OCT16	101	MF4637	>=250 mg/day	Yes	Yes	>=250 mg/day	No	Yes	Yes	Yes	Yes
Visit 1	5	POSTMENOPAUSAL	genital/urinary	Yes	Yes	12_020		2004				Yes		Yes	No	Yes		No			29SEP16	29SEP2016	12	Entered	60	Female	05OCT16	101	MF4637	>=250 mg/day	Yes	Yes	>=250 mg/day	No	Yes	Yes	Yes	Yes
Visit 1	6	CORONARY ARTERY DISEASE	cardiovascular	Yes	Yes	12_020		2007				Yes		Yes	No	Yes		No			29SEP16	29SEP2016	12	Entered	60	Female	05OCT16	101	MF4637	>=250 mg/day	Yes	Yes	>=250 mg/day	No	Yes	Yes	Yes	Yes
Visit 1	7	CERVICAL DISC HERNIATION	musculoskeletal	Yes	Yes	12_020		2005				Yes		Yes	No	Yes		No			29SEP16	29SEP2016	12	Entered	60	Female	05OCT16	101	MF4637	>=250 mg/day	Yes	Yes	>=250 mg/day	No	Yes	Yes	Yes	Yes
Visit 1	8	CHORNIC BACK PAIN	musculoskeletal	Yes	Yes	12_020		2011				Yes		Yes	No	Yes		No			29SEP16	29SEP2016	12	Entered	60	Female	05OCT16	101	MF4637	>=250 mg/day	Yes	Yes	>=250 mg/day	No	Yes	Yes	Yes	Yes
Visit 1	9	GASTROESOPHAGEAL RELFUX DISEASE	gastrointestinal	Yes	Yes	12_020		2011				Yes		Yes	No	Yes		No			29SEP16	29SEP2016	12	Entered	60	Female	05OCT16	101	MF4637	>=250 mg/day	Yes	Yes	>=250 mg/day	No	Yes	Yes	Yes	Yes
Visit 1	10	OSTEOARTHRITIS	musculoskeletal	Yes	Yes	12_020		2010				Yes		Yes	No	Yes		No			29SEP16	29SEP2016	12	Entered	60	Female	05OCT16	101	MF4637	>=250 mg/day	Yes	Yes	>=250 mg/day	No	Yes	Yes	Yes	Yes
Visit 1	11	INSOMNIA	psychological	Yes	Yes	12_020		2009				Yes		Yes	No	Yes		No			29SEP16	29SEP2016	12	Entered	60	Female	05OCT16	101	MF4637	>=250 mg/day	Yes	Yes	>=250 mg/day	No	Yes	Yes	Yes	Yes
Visit 1	12	ANXIETY	psychological	Yes	Yes	12_020		2009				Yes		Yes	No	Yes		No			29SEP16	29SEP2016	12	Entered	60	Female	05OCT16	101	MF4637	>=250 mg/day	Yes	Yes	>=250 mg/day	No	Yes	Yes	Yes	Yes
Visit 1	13	BILATERAL CATARACTS	eyes, ears, nose, throat	Yes		12_020		2008		2008		Yes		Yes	No	Yes		No			29SEP16	29SEP2016	12	Entered	60	Female	05OCT16	101	MF4637	>=250 mg/day	Yes	Yes	>=250 mg/day	No	Yes	Yes	Yes	Yes
Visit 1	14	BILATERAL CATARACTS SURGERY	surgeries	Yes		12_020		2008		2008		Yes		Yes	No	Yes		No			29SEP16	29SEP2016	12	Entered	60	Female	05OCT16	101	MF4637	>=250 mg/day	Yes	Yes	>=250 mg/day	No	Yes	Yes	Yes	Yes
Visit 1	15	OVARIAN CYST	genital/urinary	Yes		12_020		1982		1982		Yes		Yes	No	Yes		No			29SEP16	29SEP2016	12	Entered	60	Female	05OCT16	101	MF4637	>=250 mg/day	Yes	Yes	>=250 mg/day	No	Yes	Yes	Yes	Yes
Visit 1	16	OVARIAN CYST SURGERY	genital/urinary	Yes		12_020		1982		1982		Yes		Yes	No	Yes		No			29SEP16	29SEP2016	12	Entered	60	Female	05OCT16	101	MF4637	>=250 mg/day	Yes	Yes	>=250 mg/day	No	Yes	Yes	Yes	Yes
Visit 1	17	BENIGN CYST IN LEFT BREAST	dermatological	Yes		12_020		2011		2012		Yes		Yes	No	Yes		No			29SEP16	29SEP2016	12	Entered	60	Female	05OCT16	101	MF4637	>=250 mg/day	Yes	Yes	>=250 mg/day	No	Yes	Yes	Yes	Yes
Visit 1	18	BENIGN CYST LEFT BREAST SURGERY	dermatological	Yes		12_020		2012		2012		Yes		Yes	No	Yes		No			29SEP16	29SEP2016	12	Entered	60	Female	05OCT16	101	MF4637	>=250 mg/day	Yes	Yes	>=250 mg/day	No	Yes	Yes	Yes	Yes
Visit 2	1	DIABETES MELLITUS TYPE II	endocrine	Yes	Yes	12_020		1980					No										12	Entered	60	Female	05OCT16	101	MF4637	>=250 mg/day	Yes	Yes	>=250 mg/day	No	Yes	Yes	Yes	Yes
Visit 2	2	HYPERTENSION	cardiovascular	Yes	Yes	12_020		1980					No										12	Entered	60	Female	05OCT16	101	MF4637	>=250 mg/day	Yes	Yes	>=250 mg/day	No	Yes	Yes	Yes	Yes
Visit 2	3	DYSLIPIDEMIA	endocrine	Yes	Yes	12_020		2011					No										12	Entered	60	Female	05OCT16	101	MF4637	>=250 mg/day	Yes	Yes	>=250 mg/day	No	Yes	Yes	Yes	Yes
Visit 2	4	OVERWEIGHT	endocrine	Yes	Yes	12_020		2015					No										12	Entered	60	Female	05OCT16	101	MF4637	>=250 mg/day	Yes	Yes	>=250 mg/day	No	Yes	Yes	Yes	Yes
Visit 2	5	POSTMENOPAUSAL	genital/urinary	Yes	Yes	12_020		2004					No										12	Entered	60	Female	05OCT16	101	MF4637	>=250 mg/day	Yes	Yes	>=250 mg/day	No	Yes	Yes	Yes	Yes
Visit 2	6	CORONARY ARTERY DISEASE	cardiovascular	Yes	Yes	12_020		2007					No										12	Entered	60	Female	05OCT16	101	MF4637	>=250 mg/day	Yes	Yes	>=250 mg/day	No	Yes	Yes	Yes	Yes
Visit 2	7	CERVICAL DISC HERNIATION	musculoskeletal	Yes	Yes	12_020		2005					No										12	Entered	60	Female	05OCT16	101	MF4637	>=250 mg/day	Yes	Yes	>=250 mg/day	No	Yes	Yes	Yes	Yes
Visit 2	8	CHORNIC BACK PAIN	musculoskeletal	Yes	Yes	12_020		2011					No										12	Entered	60	Female	05OCT16	101	MF4637	>=250 mg/day	Yes	Yes	>=250 mg/day	No	Yes	Yes	Yes	Yes
Visit 2	9	GASTROESOPHAGEAL RELFUX DISEASE	gastrointestinal	Yes	Yes	12_020		2011					No										12	Entered	60	Female	05OCT16	101	MF4637	>=250 mg/day	Yes	Yes	>=250 mg/day	No	Yes	Yes	Yes	Yes
Visit 2	10	OSTEOARTHRITIS	musculoskeletal	Yes	Yes	12_020		2010					No										12	Entered	60	Female	05OCT16	101	MF4637	>=250 mg/day	Yes	Yes	>=250 mg/day	No	Yes	Yes	Yes	Yes
Visit 2	11	INSOMNIA	psychological	Yes	Yes	12_020		2009					No										12	Entered	60	Female	05OCT16	101	MF4637	>=250 mg/day	Yes	Yes	>=250 mg/day	No	Yes	Yes	Yes	Yes
Visit 2	12	ANXIETY	psychological	Yes	Yes	12_020		2009					No										12	Entered	60	Female	05OCT16	101	MF4637	>=250 mg/day	Yes	Yes	>=250 mg/day	No	Yes	Yes	Yes	Yes
Visit 2	13	BILATERAL CATARACTS	eyes, ears, nose, throat	Yes		12_020		2008		2008			No										12	Entered	60	Female	05OCT16	101	MF4637	>=250 mg/day	Yes	Yes	>=250 mg/day	No	Yes	Yes	Yes	Yes
Visit 2	14	BILATERAL CATARACTS SURGERY	surgeries	Yes		12_020		2008		2008			No										12	Entered	60	Female	05OCT16	101	MF4637	>=250 mg/day	Yes	Yes	>=250 mg/day	No	Yes	Yes	Yes	Yes
Visit 2	15	OVARIAN CYST	genital/urinary	Yes		12_020		1982		1982			No										12	Entered	60	Female	05OCT16	101	MF4637	>=250 mg/day	Yes	Yes	>=250 mg/day	No	Yes	Yes	Yes	Yes
Visit 2	16	OVARIAN CYST SURGERY	genital/urinary	Yes		12_020		1982		1982			No										12	Entered	60	Female	05OCT16	101	MF4637	>=250 mg/day	Yes	Yes	>=250 mg/day	No	Yes	Yes	Yes	Yes
Visit 2	17	BENIGN CYST IN LEFT BREAST	dermatological	Yes		12_020		2011		2012			No										12	Entered	60	Female	05OCT16	101	MF4637	>=250 mg/day	Yes	Yes	>=250 mg/day	No	Yes	Yes	Yes	Yes
Visit 2	18	BENIGN CYST LEFT BREAST SURGERY	dermatological	Yes		12_020		2012		2012			No										12	Entered	60	Female	05OCT16	101	MF4637	>=250 mg/day	Yes	Yes	>=250 mg/day	No	Yes	Yes	Yes	Yes
Visit 1	1	DIABETES MELLITUS TYPE II	endocrine	Yes	Yes	12_021		2006				Yes		Yes	No	Yes		No			29SEP16	29SEP2016	12	Entered	54	Male	11OCT16	254	MF4637	>=250 mg/day	Yes	Yes	>=250 mg/day	No	Yes	Yes	Yes	Yes
Visit 1	2	HYPERTENSION	cardiovascular	Yes	Yes	12_021		1996				Yes		Yes	No	Yes		No			29SEP16	29SEP2016	12	Entered	54	Male	11OCT16	254	MF4637	>=250 mg/day	Yes	Yes	>=250 mg/day	No	Yes	Yes	Yes	Yes
Visit 1	3	DYSLIPIDEMIA	endocrine	Yes	Yes	12_021		2012				Yes		Yes	No	Yes		No			29SEP16	29SEP2016	12	Entered	54	Male	11OCT16	254	MF4637	>=250 mg/day	Yes	Yes	>=250 mg/day	No	Yes	Yes	Yes	Yes
Visit 1	4	GASTROESOPHAGEAL REFLUX DISEASE	gastrointestinal	Yes	Yes	12_021		2000				Yes		Yes	No	Yes		No			29SEP16	29SEP2016	12	Entered	54	Male	11OCT16	254	MF4637	>=250 mg/day	Yes	Yes	>=250 mg/day	No	Yes	Yes	Yes	Yes
Visit 1	5	ALLERGIC RHINITIS	allergies	Yes	Yes	12_021		2006				Yes		Yes	No	Yes		No			29SEP16	29SEP2016	12	Entered	54	Male	11OCT16	254	MF4637	>=250 mg/day	Yes	Yes	>=250 mg/day	No	Yes	Yes	Yes	Yes
Visit 1	6	VITAMIN D DEFICIENCY	endocrine	Yes	Yes	12_021		02UNK2016				Yes		Yes	No	Yes		No			29SEP16	29SEP2016	12	Entered	54	Male	11OCT16	254	MF4637	>=250 mg/day	Yes	Yes	>=250 mg/day	No	Yes	Yes	Yes	Yes
Visit 1	7	ATHEROSCLEROTIC HEART DISEASE	cardiovascular	Yes	Yes	12_021		2015				Yes		Yes	No	Yes		No			29SEP16	29SEP2016	12	Entered	54	Male	11OCT16	254	MF4637	>=250 mg/day	Yes	Yes	>=250 mg/day	No	Yes	Yes	Yes	Yes
Visit 1	8	OBESITY	endocrine	Yes	Yes	12_021		2011				Yes		Yes	No	Yes		No			29SEP16	29SEP2016	12	Entered	54	Male	11OCT16	254	MF4637	>=250 mg/day	Yes	Yes	>=250 mg/day	No	Yes	Yes	Yes	Yes
Visit 1	9	MITRAL INSUFFICIENCY	cardiovascular	Yes	Yes	12_021		2015				Yes		Yes	No	Yes		No			29SEP16	29SEP2016	12	Entered	54	Male	11OCT16	254	MF4637	>=250 mg/day	Yes	Yes	>=250 mg/day	No	Yes	Yes	Yes	Yes
Visit 1	10	TRICUSPID INSUFFICIENCY	cardiovascular	Yes	Yes	12_021		2015				Yes		Yes	No	Yes		No			29SEP16	29SEP2016	12	Entered	54	Male	11OCT16	254	MF4637	>=250 mg/day	Yes	Yes	>=250 mg/day	No	Yes	Yes	Yes	Yes
Visit 1	11	MYOCARDIAL ISCHEMIA	cardiovascular	Yes	Yes	12_021		2015				Yes		Yes	No	Yes		No			29SEP16	29SEP2016	12	Entered	54	Male	11OCT16	254	MF4637	>=250 mg/day	Yes	Yes	>=250 mg/day	No	Yes	Yes	Yes	Yes
Visit 1	12	LEFT KNEE ARTHROSIS	musculoskeletal	Yes	Yes	12_021		2015				Yes		Yes	No	Yes		No			29SEP16	29SEP2016	12	Entered	54	Male	11OCT16	254	MF4637	>=250 mg/day	Yes	Yes	>=250 mg/day	No	Yes	Yes	Yes	Yes
Visit 1	13	HERPES ZOSTER	dermatological	Yes		12_021		1992		1992		Yes		Yes	No	Yes		No			29SEP16	29SEP2016	12	Entered	54	Male	11OCT16	254	MF4637	>=250 mg/day	Yes	Yes	>=250 mg/day	No	Yes	Yes	Yes	Yes
Visit 2	1	DIABETES MELLITUS TYPE II	endocrine	Yes	Yes	12_021		2006					No										12	Entered	54	Male	11OCT16	254	MF4637	>=250 mg/day	Yes	Yes	>=250 mg/day	No	Yes	Yes	Yes	Yes
Visit 2	2	HYPERTENSION	cardiovascular	Yes	Yes	12_021		1996					No										12	Entered	54	Male	11OCT16	254	MF4637	>=250 mg/day	Yes	Yes	>=250 mg/day	No	Yes	Yes	Yes	Yes
Visit 2	3	DYSLIPIDEMIA	endocrine	Yes	Yes	12_021		2012					No										12	Entered	54	Male	11OCT16	254	MF4637	>=250 mg/day	Yes	Yes	>=250 mg/day	No	Yes	Yes	Yes	Yes
Visit 2	4	GASTROESOPHAGEAL REFLUX DISEASE	gastrointestinal	Yes	Yes	12_021		2000					No										12	Entered	54	Male	11OCT16	254	MF4637	>=250 mg/day	Yes	Yes	>=250 mg/day	No	Yes	Yes	Yes	Yes
Visit 2	5	ALLERGIC RHINITIS	allergies	Yes	Yes	12_021		2006					No										12	Entered	54	Male	11OCT16	254	MF4637	>=250 mg/day	Yes	Yes	>=250 mg/day	No	Yes	Yes	Yes	Yes
Visit 2	6	VITAMIN D DEFICIENCY	endocrine	Yes	Yes	12_021		02UNK2016					No										12	Entered	54	Male	11OCT16	254	MF4637	>=250 mg/day	Yes	Yes	>=250 mg/day	No	Yes	Yes	Yes	Yes
Visit 2	7	ATHEROSCLEROTIC HEART DISEASE	cardiovascular	Yes	Yes	12_021		2015					No										12	Entered	54	Male	11OCT16	254	MF4637	>=250 mg/day	Yes	Yes	>=250 mg/day	No	Yes	Yes	Yes	Yes
Visit 2	8	OBESITY	endocrine	Yes	Yes	12_021		2011					No										12	Entered	54	Male	11OCT16	254	MF4637	>=250 mg/day	Yes	Yes	>=250 mg/day	No	Yes	Yes	Yes	Yes
Visit 2	9	MITRAL INSUFFICIENCY	cardiovascular	Yes	Yes	12_021		2015					No										12	Entered	54	Male	11OCT16	254	MF4637	>=250 mg/day	Yes	Yes	>=250 mg/day	No	Yes	Yes	Yes	Yes
Visit 2	10	TRICUSPID INSUFFICIENCY	cardiovascular	Yes	Yes	12_021		2015					No										12	Entered	54	Male	11OCT16	254	MF4637	>=250 mg/day	Yes	Yes	>=250 mg/day	No	Yes	Yes	Yes	Yes
Visit 2	11	MYOCARDIAL ISCHEMIA	cardiovascular	Yes		12_021		2015		2015			No										12	Entered	54	Male	11OCT16	254	MF4637	>=250 mg/day	Yes	Yes	>=250 mg/day	No	Yes	Yes	Yes	Yes
Visit 2	12	LEFT KNEE ARTHROSIS	musculoskeletal	Yes	Yes	12_021		2015					No										12	Entered	54	Male	11OCT16	254	MF4637	>=250 mg/day	Yes	Yes	>=250 mg/day	No	Yes	Yes	Yes	Yes
Visit 2	13	HERPES ZOSTER	dermatological	Yes		12_021		1992		1992			No										12	Entered	54	Male	11OCT16	254	MF4637	>=250 mg/day	Yes	Yes	>=250 mg/day	No	Yes	Yes	Yes	Yes
Visit 1	1	DIABETES MELLITUS TYPE II	endocrine	Yes	Yes	12_022	07SEP16	07SEP2016				Yes		Yes	No	Yes		No			03OCT16	03OCT2016	12	Entered	43	Male	12OCT16	253	Placebo	<250 mg/day	Yes	No	<250 mg/day	No	Yes	Yes	Yes	Yes
Visit 1	2	HYPERTENSION	cardiovascular	Yes	Yes	12_022		2014				Yes		Yes	No	Yes		No			03OCT16	03OCT2016	12	Entered	43	Male	12OCT16	253	Placebo	<250 mg/day	Yes	No	<250 mg/day	No	Yes	Yes	Yes	Yes
Visit 1	3	DYSLIPIDEMIA	endocrine	Yes	Yes	12_022		2015				Yes		Yes	No	Yes		No			03OCT16	03OCT2016	12	Entered	43	Male	12OCT16	253	Placebo	<250 mg/day	Yes	No	<250 mg/day	No	Yes	Yes	Yes	Yes
Visit 1	4	OBESITY	endocrine	Yes	Yes	12_022		2012				Yes		Yes	No	Yes		No			03OCT16	03OCT2016	12	Entered	43	Male	12OCT16	253	Placebo	<250 mg/day	Yes	No	<250 mg/day	No	Yes	Yes	Yes	Yes
Visit 1	5	ACANTHOSIS NIGRICANS	dermatological	Yes	Yes	12_022		2006				Yes		Yes	No	Yes		No			03OCT16	03OCT2016	12	Entered	43	Male	12OCT16	253	Placebo	<250 mg/day	Yes	No	<250 mg/day	No	Yes	Yes	Yes	Yes
Visit 1	6	CERVICAL SPONDILOSIS	musculoskeletal	Yes	Yes	12_022		2010				Yes		Yes	No	Yes		No			03OCT16	03OCT2016	12	Entered	43	Male	12OCT16	253	Placebo	<250 mg/day	Yes	No	<250 mg/day	No	Yes	Yes	Yes	Yes
Visit 1	7	BILATERAL CARPAL TUNNEL SYNDROME	musculoskeletal	Yes	Yes	12_022		2013				Yes		Yes	No	Yes		No			03OCT16	03OCT2016	12	Entered	43	Male	12OCT16	253	Placebo	<250 mg/day	Yes	No	<250 mg/day	No	Yes	Yes	Yes	Yes
Visit 1	8	MILD DEGENERATIVE DISC DISEASE AT CERVICAL REGION	musculoskeletal	Yes	Yes	12_022	29AUG16	29AUG2016				Yes		Yes	No	Yes		No			03OCT16	03OCT2016	12	Entered	43	Male	12OCT16	253	Placebo	<250 mg/day	Yes	No	<250 mg/day	No	Yes	Yes	Yes	Yes
Visit 1	9	HYPERURICEMIA	blood/bleeding disorders	Yes		12_022		2015	07SEP16	07SEP2016		Yes		Yes	No	Yes		No			03OCT16	03OCT2016	12	Entered	43	Male	12OCT16	253	Placebo	<250 mg/day	Yes	No	<250 mg/day	No	Yes	Yes	Yes	Yes
Visit 1	10	POLYCYTHEMIA	blood/bleeding disorders	Yes	Yes	12_022	07SEP16	07SEP2016				Yes		Yes	No	Yes		No			03OCT16	03OCT2016	12	Entered	43	Male	12OCT16	253	Placebo	<250 mg/day	Yes	No	<250 mg/day	No	Yes	Yes	Yes	Yes
Visit 1	11	SINONASAL PAPILLOMAS	eyes, ears, nose, throat	Yes		12_022		2015		03UNK2016		Yes		Yes	No	Yes		No			03OCT16	03OCT2016	12	Entered	43	Male	12OCT16	253	Placebo	<250 mg/day	Yes	No	<250 mg/day	No	Yes	Yes	Yes	Yes
Visit 1	12	NASAL PAPILLECTOMY	surgeries	Yes		12_022		03UNK2016		03UNK2016		Yes		Yes	No	Yes		No			03OCT16	03OCT2016	12	Entered	43	Male	12OCT16	253	Placebo	<250 mg/day	Yes	No	<250 mg/day	No	Yes	Yes	Yes	Yes
Visit 1	13	THROMBOSED HEMORRHOIDS	gastrointestinal	Yes		12_022		2014		2014		Yes		Yes	No	Yes		No			03OCT16	03OCT2016	12	Entered	43	Male	12OCT16	253	Placebo	<250 mg/day	Yes	No	<250 mg/day	No	Yes	Yes	Yes	Yes
Visit 1	14	EXCISION OF THROMBOSED HEMORRHOIDS	surgeries	Yes		12_022		2014		2014		Yes		Yes	No	Yes		No			03OCT16	03OCT2016	12	Entered	43	Male	12OCT16	253	Placebo	<250 mg/day	Yes	No	<250 mg/day	No	Yes	Yes	Yes	Yes
Visit 2	1	DIABETES MELLITUS TYPE II	endocrine	Yes	Yes	12_022	07SEP16	07SEP2016					No										12	Entered	43	Male	12OCT16	253	Placebo	<250 mg/day	Yes	No	<250 mg/day	No	Yes	Yes	Yes	Yes
Visit 2	2	HYPERTENSION	cardiovascular	Yes	Yes	12_022		2014					No										12	Entered	43	Male	12OCT16	253	Placebo	<250 mg/day	Yes	No	<250 mg/day	No	Yes	Yes	Yes	Yes
Visit 2	3	DYSLIPIDEMIA	endocrine	Yes	Yes	12_022		2015					No										12	Entered	43	Male	12OCT16	253	Placebo	<250 mg/day	Yes	No	<250 mg/day	No	Yes	Yes	Yes	Yes
Visit 2	4	OBESITY	endocrine	Yes	Yes	12_022		2012					No										12	Entered	43	Male	12OCT16	253	Placebo	<250 mg/day	Yes	No	<250 mg/day	No	Yes	Yes	Yes	Yes
Visit 2	5	ACANTHOSIS NIGRICANS	dermatological	Yes	Yes	12_022		2006					No										12	Entered	43	Male	12OCT16	253	Placebo	<250 mg/day	Yes	No	<250 mg/day	No	Yes	Yes	Yes	Yes
Visit 2	6	CERVICAL SPONDILOSIS	musculoskeletal	Yes	Yes	12_022		2010					No										12	Entered	43	Male	12OCT16	253	Placebo	<250 mg/day	Yes	No	<250 mg/day	No	Yes	Yes	Yes	Yes
Visit 2	7	BILATERAL CARPAL TUNNEL SYNDROME	musculoskeletal	Yes	Yes	12_022		2013					No										12	Entered	43	Male	12OCT16	253	Placebo	<250 mg/day	Yes	No	<250 mg/day	No	Yes	Yes	Yes	Yes
Visit 2	8	MILD DEGENERATIVE DISC DISEASE AT CERVICAL REGION	musculoskeletal	Yes	Yes	12_022	29AUG16	29AUG2016					No										12	Entered	43	Male	12OCT16	253	Placebo	<250 mg/day	Yes	No	<250 mg/day	No	Yes	Yes	Yes	Yes
Visit 2	9	HYPERURICEMIA	blood/bleeding disorders	Yes		12_022		2015	07SEP16	07SEP2016			No										12	Entered	43	Male	12OCT16	253	Placebo	<250 mg/day	Yes	No	<250 mg/day	No	Yes	Yes	Yes	Yes
Visit 2	10	POLYCYTHEMIA	blood/bleeding disorders	Yes	Yes	12_022	07SEP16	07SEP2016					No										12	Entered	43	Male	12OCT16	253	Placebo	<250 mg/day	Yes	No	<250 mg/day	No	Yes	Yes	Yes	Yes
Visit 2	11	SINONASAL PAPILLOMAS	eyes, ears, nose, throat	Yes		12_022		2015		03UNK2016			No										12	Entered	43	Male	12OCT16	253	Placebo	<250 mg/day	Yes	No	<250 mg/day	No	Yes	Yes	Yes	Yes
Visit 2	12	NASAL PAPILLECTOMY	surgeries	Yes		12_022		03UNK2016		03UNK2016			No										12	Entered	43	Male	12OCT16	253	Placebo	<250 mg/day	Yes	No	<250 mg/day	No	Yes	Yes	Yes	Yes
Visit 2	13	THROMBOSED HEMORRHOIDS	gastrointestinal	Yes		12_022		2014		2014			No										12	Entered	43	Male	12OCT16	253	Placebo	<250 mg/day	Yes	No	<250 mg/day	No	Yes	Yes	Yes	Yes
Visit 2	14	EXCISION OF THROMBOSED HEMORRHOIDS	surgeries	Yes		12_022		2014		2014			No										12	Entered	43	Male	12OCT16	253	Placebo	<250 mg/day	Yes	No	<250 mg/day	No	Yes	Yes	Yes	Yes
Visit 1	1	DIABETES MELLITUS TYPE II	endocrine	Yes	Yes	12_024		2014				Yes		Yes	No	No		No			03OCT16	03OCT2016	12	Early Termination	41	Female	11OCT16	139	MF4637	>=250 mg/day	Yes	No	>=250 mg/day	No	Yes	Yes	Yes	Yes
Visit 1	2	OBESITY	endocrine	Yes	Yes	12_024		2006				Yes		Yes	No	No		No			03OCT16	03OCT2016	12	Early Termination	41	Female	11OCT16	139	MF4637	>=250 mg/day	Yes	No	>=250 mg/day	No	Yes	Yes	Yes	Yes
Visit 1	3	CHOLECYSTITIS	gastrointestinal	Yes		12_024		2015		2015		Yes		Yes	No	No		No			03OCT16	03OCT2016	12	Early Termination	41	Female	11OCT16	139	MF4637	>=250 mg/day	Yes	No	>=250 mg/day	No	Yes	Yes	Yes	Yes
Visit 1	4	CHOLECYSTECTOMY	surgeries	Yes		12_024		2015		2015		Yes		Yes	No	No		No			03OCT16	03OCT2016	12	Early Termination	41	Female	11OCT16	139	MF4637	>=250 mg/day	Yes	No	>=250 mg/day	No	Yes	Yes	Yes	Yes
Visit 1	5	CLAVICLE FRACTURE	musculoskeletal	Yes		12_024		1995		1995		Yes		Yes	No	No		No			03OCT16	03OCT2016	12	Early Termination	41	Female	11OCT16	139	MF4637	>=250 mg/day	Yes	No	>=250 mg/day	No	Yes	Yes	Yes	Yes
Visit 1	6	CLAVICLE FRACTURE SURGERY	surgeries	Yes		12_024		1995		1995		Yes		Yes	No	No		No			03OCT16	03OCT2016	12	Early Termination	41	Female	11OCT16	139	MF4637	>=250 mg/day	Yes	No	>=250 mg/day	No	Yes	Yes	Yes	Yes
Visit 1	7	TUMMY TUCK	surgeries	Yes		12_024		2008		2008		Yes		Yes	No	No		No			03OCT16	03OCT2016	12	Early Termination	41	Female	11OCT16	139	MF4637	>=250 mg/day	Yes	No	>=250 mg/day	No	Yes	Yes	Yes	Yes
Visit 1	8	GASTROESOPHAGEAL REFLUX DISEASE	gastrointestinal	Yes	Yes	12_024		2014				Yes		Yes	No	No		No			03OCT16	03OCT2016	12	Early Termination	41	Female	11OCT16	139	MF4637	>=250 mg/day	Yes	No	>=250 mg/day	No	Yes	Yes	Yes	Yes
Visit 1	9	VITAMIN D DEFICIENCY	endocrine	Yes	Yes	12_024	31AUG16	31AUG2016				Yes		Yes	No	No		No			03OCT16	03OCT2016	12	Early Termination	41	Female	11OCT16	139	MF4637	>=250 mg/day	Yes	No	>=250 mg/day	No	Yes	Yes	Yes	Yes
Visit 1	10	DEPRESSION	psychological	Yes	Yes	12_024		2015				Yes		Yes	No	No		No			03OCT16	03OCT2016	12	Early Termination	41	Female	11OCT16	139	MF4637	>=250 mg/day	Yes	No	>=250 mg/day	No	Yes	Yes	Yes	Yes
Visit 2	1	DIABETES MELLITUS TYPE II	endocrine	Yes	Yes	12_024		2014					No										12	Early Termination	41	Female	11OCT16	139	MF4637	>=250 mg/day	Yes	No	>=250 mg/day	No	Yes	Yes	Yes	Yes
Visit 2	2	OBESITY	endocrine	Yes	Yes	12_024		2006					No										12	Early Termination	41	Female	11OCT16	139	MF4637	>=250 mg/day	Yes	No	>=250 mg/day	No	Yes	Yes	Yes	Yes
Visit 2	3	CHOLECYSTITIS	gastrointestinal	Yes		12_024		2015		2015			No										12	Early Termination	41	Female	11OCT16	139	MF4637	>=250 mg/day	Yes	No	>=250 mg/day	No	Yes	Yes	Yes	Yes
Visit 2	4	CHOLECYSTECTOMY	surgeries	Yes		12_024		2015		2015			No										12	Early Termination	41	Female	11OCT16	139	MF4637	>=250 mg/day	Yes	No	>=250 mg/day	No	Yes	Yes	Yes	Yes
Visit 2	5	CLAVICLE FRACTURE	musculoskeletal	Yes		12_024		1995		1995			No										12	Early Termination	41	Female	11OCT16	139	MF4637	>=250 mg/day	Yes	No	>=250 mg/day	No	Yes	Yes	Yes	Yes
Visit 2	6	CLAVICLE FRACTURE SURGERY	surgeries	Yes		12_024		1995		1995			No										12	Early Termination	41	Female	11OCT16	139	MF4637	>=250 mg/day	Yes	No	>=250 mg/day	No	Yes	Yes	Yes	Yes
Visit 2	7	TUMMY TUCK	surgeries	Yes		12_024		2008		2008			No										12	Early Termination	41	Female	11OCT16	139	MF4637	>=250 mg/day	Yes	No	>=250 mg/day	No	Yes	Yes	Yes	Yes
Visit 2	8	GASTROESOPHAGEAL REFLUX DISEASE	gastrointestinal	Yes	Yes	12_024		2014					No										12	Early Termination	41	Female	11OCT16	139	MF4637	>=250 mg/day	Yes	No	>=250 mg/day	No	Yes	Yes	Yes	Yes
Visit 2	9	VITAMIN D DEFICIENCY	endocrine	Yes	Yes	12_024	31AUG16	31AUG2016					No										12	Early Termination	41	Female	11OCT16	139	MF4637	>=250 mg/day	Yes	No	>=250 mg/day	No	Yes	Yes	Yes	Yes
Visit 2	10	DEPRESSION	psychological	Yes	Yes	12_024		2015					No										12	Early Termination	41	Female	11OCT16	139	MF4637	>=250 mg/day	Yes	No	>=250 mg/day	No	Yes	Yes	Yes	Yes
Visit 1	1	ASTHMA	eyes, ears, nose, throat	Yes		12_025		1950		1962		Yes		Yes	No	Yes		No			03OCT16	03OCT2016	12	Entered	73	Male	14OCT16	258	MF4637	>=250 mg/day	Yes	No	>=250 mg/day	No	Yes	Yes	Yes	Yes
Visit 1	2	HYPERTENSION	cardiovascular	Yes	Yes	12_025		1972				Yes		Yes	No	Yes		No			03OCT16	03OCT2016	12	Entered	73	Male	14OCT16	258	MF4637	>=250 mg/day	Yes	No	>=250 mg/day	No	Yes	Yes	Yes	Yes
Visit 1	3	ATHEROSCLEROTIC DISEASE OF THORACIC AORTA	cardiovascular	Yes	Yes	12_025		2012				Yes		Yes	No	Yes		No			03OCT16	03OCT2016	12	Entered	73	Male	14OCT16	258	MF4637	>=250 mg/day	Yes	No	>=250 mg/day	No	Yes	Yes	Yes	Yes
Visit 1	4	DIVERTICULOSIS OF COLON	gastrointestinal	Yes	Yes	12_025	26SEP14	26SEP2014				Yes		Yes	No	Yes		No			03OCT16	03OCT2016	12	Entered	73	Male	14OCT16	258	MF4637	>=250 mg/day	Yes	No	>=250 mg/day	No	Yes	Yes	Yes	Yes
Visit 1	5	GENERALIZED ARTHRITIS	musculoskeletal	Yes	Yes	12_025		1999				Yes		Yes	No	Yes		No			03OCT16	03OCT2016	12	Entered	73	Male	14OCT16	258	MF4637	>=250 mg/day	Yes	No	>=250 mg/day	No	Yes	Yes	Yes	Yes
Visit 1	6	DIABETES MELLITUS TYPE II	endocrine	Yes	Yes	12_025		2000				Yes		Yes	No	Yes		No			03OCT16	03OCT2016	12	Entered	73	Male	14OCT16	258	MF4637	>=250 mg/day	Yes	No	>=250 mg/day	No	Yes	Yes	Yes	Yes
Visit 1	7	DIABETIC POLYNEUROPATHY	neurological	Yes	Yes	12_025		2010				Yes		Yes	No	Yes		No			03OCT16	03OCT2016	12	Entered	73	Male	14OCT16	258	MF4637	>=250 mg/day	Yes	No	>=250 mg/day	No	Yes	Yes	Yes	Yes
Visit 1	8	ERECTILE DYSFUNCTION	genital/urinary	Yes	Yes	12_025		1999				Yes		Yes	No	Yes		No			03OCT16	03OCT2016	12	Entered	73	Male	14OCT16	258	MF4637	>=250 mg/day	Yes	No	>=250 mg/day	No	Yes	Yes	Yes	Yes
Visit 1	9	OBESITY	endocrine	Yes	Yes	12_025		2000				Yes		Yes	No	Yes		No			03OCT16	03OCT2016	12	Entered	73	Male	14OCT16	258	MF4637	>=250 mg/day	Yes	No	>=250 mg/day	No	Yes	Yes	Yes	Yes
Visit 1	10	CHRONIC KIDNEY DISEASE STAGE II	genital/urinary	Yes	Yes	12_025		2010				Yes		Yes	No	Yes		No			03OCT16	03OCT2016	12	Entered	73	Male	14OCT16	258	MF4637	>=250 mg/day	Yes	No	>=250 mg/day	No	Yes	Yes	Yes	Yes
Visit 1	11	BENIGN PROSTATIC HYPERPLASIA	genital/urinary	Yes	Yes	12_025		2012				Yes		Yes	No	Yes		No			03OCT16	03OCT2016	12	Entered	73	Male	14OCT16	258	MF4637	>=250 mg/day	Yes	No	>=250 mg/day	No	Yes	Yes	Yes	Yes
Visit 1	12	BILATERAL CATARACT	eyes, ears, nose, throat	Yes	Yes	12_025		2010				Yes		Yes	No	Yes		No			03OCT16	03OCT2016	12	Entered	73	Male	14OCT16	258	MF4637	>=250 mg/day	Yes	No	>=250 mg/day	No	Yes	Yes	Yes	Yes
Visit 1	13	RIGHT EYE CATARACT EXTRACTION WITH PCIOL	surgeries	Yes		12_025	09APR16	09APR2016	09APR16	09APR2016		Yes		Yes	No	Yes		No			03OCT16	03OCT2016	12	Entered	73	Male	14OCT16	258	MF4637	>=250 mg/day	Yes	No	>=250 mg/day	No	Yes	Yes	Yes	Yes
Visit 1	14	LEFT EYE CATARACT EXTRACTION WITH PCIOL	surgeries	Yes		12_025	11MAY16	11MAY2016	11MAY16	11MAY2016		Yes		Yes	No	Yes		No			03OCT16	03OCT2016	12	Entered	73	Male	14OCT16	258	MF4637	>=250 mg/day	Yes	No	>=250 mg/day	No	Yes	Yes	Yes	Yes
Visit 1	15	PENILE IMPLANT SURGERY	surgeries	Yes		12_025		03UNK2016		03UNK2016		Yes		Yes	No	Yes		No			03OCT16	03OCT2016	12	Entered	73	Male	14OCT16	258	MF4637	>=250 mg/day	Yes	No	>=250 mg/day	No	Yes	Yes	Yes	Yes
Visit 1	16	DYSLIPIDEMIA	endocrine	Yes	Yes	12_025		2012				Yes		Yes	No	Yes		No			03OCT16	03OCT2016	12	Entered	73	Male	14OCT16	258	MF4637	>=250 mg/day	Yes	No	>=250 mg/day	No	Yes	Yes	Yes	Yes
Visit 1	17	GALLSTONES	gastrointestinal	Yes	Yes	12_025	03OCT16	03OCT2016				Yes		Yes	No	Yes		No			03OCT16	03OCT2016	12	Entered	73	Male	14OCT16	258	MF4637	>=250 mg/day	Yes	No	>=250 mg/day	No	Yes	Yes	Yes	Yes
Visit 1	18	ALLERGIC RHINITIS	eyes, ears, nose, throat	Yes	Yes	12_025		2015				Yes		Yes	No	Yes		No			03OCT16	03OCT2016	12	Entered	73	Male	14OCT16	258	MF4637	>=250 mg/day	Yes	No	>=250 mg/day	No	Yes	Yes	Yes	Yes
Visit 1	19	VITAMIN D DEFICIENCY	endocrine	Yes	Yes	12_025		2016				Yes		Yes	No	Yes		No			03OCT16	03OCT2016	12	Entered	73	Male	14OCT16	258	MF4637	>=250 mg/day	Yes	No	>=250 mg/day	No	Yes	Yes	Yes	Yes
Visit 1	20	INSOMNIA	psychological	Yes	Yes	12_025		2014				Yes		Yes	No	Yes		No			03OCT16	03OCT2016	12	Entered	73	Male	14OCT16	258	MF4637	>=250 mg/day	Yes	No	>=250 mg/day	No	Yes	Yes	Yes	Yes
Visit 1	21	MUSCLE PAIN	musculoskeletal	Yes	Yes	12_025		2000				Yes		Yes	No	Yes		No			03OCT16	03OCT2016	12	Entered	73	Male	14OCT16	258	MF4637	>=250 mg/day	Yes	No	>=250 mg/day	No	Yes	Yes	Yes	Yes
Visit 1	22	WEAKNESS BOTH LEGS	musculoskeletal	Yes	Yes	12_025		2015				Yes		Yes	No	Yes		No			03OCT16	03OCT2016	12	Entered	73	Male	14OCT16	258	MF4637	>=250 mg/day	Yes	No	>=250 mg/day	No	Yes	Yes	Yes	Yes
Visit 1	23	HISTORY OF FALLS	musculoskeletal	Yes	Yes	12_025		2015				Yes		Yes	No	Yes		No			03OCT16	03OCT2016	12	Entered	73	Male	14OCT16	258	MF4637	>=250 mg/day	Yes	No	>=250 mg/day	No	Yes	Yes	Yes	Yes
Visit 1	24	MACULAR DEGENERATION	eyes, ears, nose, throat	Yes	Yes	12_025	01JUL16	01JUL2016				Yes		Yes	No	Yes		No			03OCT16	03OCT2016	12	Entered	73	Male	14OCT16	258	MF4637	>=250 mg/day	Yes	No	>=250 mg/day	No	Yes	Yes	Yes	Yes
Visit 1	25	PRESBYOPIA	eyes, ears, nose, throat	Yes	Yes	12_025	01JUL16	01JUL2016				Yes		Yes	No	Yes		No			03OCT16	03OCT2016	12	Entered	73	Male	14OCT16	258	MF4637	>=250 mg/day	Yes	No	>=250 mg/day	No	Yes	Yes	Yes	Yes
Visit 1	26	DRY EYE SYNDROME	eyes, ears, nose, throat	Yes	Yes	12_025	01JUL16	01JUL2016				Yes		Yes	No	Yes		No			03OCT16	03OCT2016	12	Entered	73	Male	14OCT16	258	MF4637	>=250 mg/day	Yes	No	>=250 mg/day	No	Yes	Yes	Yes	Yes
Visit 1	27	DERMATOCHALASIS OF EYELIDS	eyes, ears, nose, throat	Yes	Yes	12_025	01JUL16	01JUL2016				Yes		Yes	No	Yes		No			03OCT16	03OCT2016	12	Entered	73	Male	14OCT16	258	MF4637	>=250 mg/day	Yes	No	>=250 mg/day	No	Yes	Yes	Yes	Yes
Visit 1	28	ASTIGMATISM	eyes, ears, nose, throat	Yes	Yes	12_025	01JUL16	01JUL2016				Yes		Yes	No	Yes		No			03OCT16	03OCT2016	12	Entered	73	Male	14OCT16	258	MF4637	>=250 mg/day	Yes	No	>=250 mg/day	No	Yes	Yes	Yes	Yes
Visit 1	29	PINGUECULA	eyes, ears, nose, throat	Yes	Yes	12_025	01JUL16	01JUL2016				Yes		Yes	No	Yes		No			03OCT16	03OCT2016	12	Entered	73	Male	14OCT16	258	MF4637	>=250 mg/day	Yes	No	>=250 mg/day	No	Yes	Yes	Yes	Yes
Visit 1	30	CORNEAL DYSTROPHY	eyes, ears, nose, throat	Yes	Yes	12_025	10MAY16	10MAY2016				Yes		Yes	No	Yes		No			03OCT16	03OCT2016	12	Entered	73	Male	14OCT16	258	MF4637	>=250 mg/day	Yes	No	>=250 mg/day	No	Yes	Yes	Yes	Yes
Visit 2	1	ASTHMA	eyes, ears, nose, throat	Yes		12_025		1950		1962			No										12	Entered	73	Male	14OCT16	258	MF4637	>=250 mg/day	Yes	No	>=250 mg/day	No	Yes	Yes	Yes	Yes
Visit 2	2	HYPERTENSION	cardiovascular	Yes	Yes	12_025		1972					No										12	Entered	73	Male	14OCT16	258	MF4637	>=250 mg/day	Yes	No	>=250 mg/day	No	Yes	Yes	Yes	Yes
Visit 2	3	ATHEROSCLEROTIC DISEASE OF THORACIC AORTA	cardiovascular	Yes	Yes	12_025		2012					No										12	Entered	73	Male	14OCT16	258	MF4637	>=250 mg/day	Yes	No	>=250 mg/day	No	Yes	Yes	Yes	Yes
Visit 2	4	DIVERTICULOSIS OF COLON	gastrointestinal	Yes	Yes	12_025	26SEP14	26SEP2014					No										12	Entered	73	Male	14OCT16	258	MF4637	>=250 mg/day	Yes	No	>=250 mg/day	No	Yes	Yes	Yes	Yes
Visit 2	5	GENERALIZED ARTHRITIS	musculoskeletal	Yes	Yes	12_025		1999					No										12	Entered	73	Male	14OCT16	258	MF4637	>=250 mg/day	Yes	No	>=250 mg/day	No	Yes	Yes	Yes	Yes
Visit 2	6	DIABETES MELLITUS TYPE II	endocrine	Yes	Yes	12_025		2000					No										12	Entered	73	Male	14OCT16	258	MF4637	>=250 mg/day	Yes	No	>=250 mg/day	No	Yes	Yes	Yes	Yes
Visit 2	7	DIABETIC POLYNEUROPATHY	neurological	Yes	Yes	12_025		2012					No										12	Entered	73	Male	14OCT16	258	MF4637	>=250 mg/day	Yes	No	>=250 mg/day	No	Yes	Yes	Yes	Yes
Visit 2	8	ERECTILE DYSFUNCTION	genital/urinary	Yes	Yes	12_025		1999					No										12	Entered	73	Male	14OCT16	258	MF4637	>=250 mg/day	Yes	No	>=250 mg/day	No	Yes	Yes	Yes	Yes
Visit 2	9	OBESITY	endocrine	Yes	Yes	12_025		2000					No										12	Entered	73	Male	14OCT16	258	MF4637	>=250 mg/day	Yes	No	>=250 mg/day	No	Yes	Yes	Yes	Yes
Visit 2	10	CHRONIC KIDNEY DISEASE	genital/urinary	Yes	Yes	12_025		2010					No										12	Entered	73	Male	14OCT16	258	MF4637	>=250 mg/day	Yes	No	>=250 mg/day	No	Yes	Yes	Yes	Yes
Visit 2	11	BENIGN PROSTATIC HYPERPLASIA	genital/urinary	Yes	Yes	12_025		2012					No										12	Entered	73	Male	14OCT16	258	MF4637	>=250 mg/day	Yes	No	>=250 mg/day	No	Yes	Yes	Yes	Yes
Visit 2	12	BILATERAL CATARACT	eyes, ears, nose, throat	Yes	Yes	12_025		2010					No										12	Entered	73	Male	14OCT16	258	MF4637	>=250 mg/day	Yes	No	>=250 mg/day	No	Yes	Yes	Yes	Yes
Visit 2	13	RIGHT EYE CATARACT EXTRACTION WITH PCIOL	surgeries	Yes		12_025	09APR16	09APR2016	09APR16	09APR2016			No										12	Entered	73	Male	14OCT16	258	MF4637	>=250 mg/day	Yes	No	>=250 mg/day	No	Yes	Yes	Yes	Yes
Visit 2	14	LEFT EYE CATARACT EXTRACTION WITH PCIOL	surgeries	Yes		12_025	11MAY16	11MAY2016	11MAY16	11MAY2016			No										12	Entered	73	Male	14OCT16	258	MF4637	>=250 mg/day	Yes	No	>=250 mg/day	No	Yes	Yes	Yes	Yes
Visit 2	15	PENILE IMPLANT SURGERY	surgeries	Yes		12_025		03UNK2016		03UNK2016			No										12	Entered	73	Male	14OCT16	258	MF4637	>=250 mg/day	Yes	No	>=250 mg/day	No	Yes	Yes	Yes	Yes
Visit 2	16	DYSLIPIDEMIA	endocrine	Yes	Yes	12_025		2012					No										12	Entered	73	Male	14OCT16	258	MF4637	>=250 mg/day	Yes	No	>=250 mg/day	No	Yes	Yes	Yes	Yes
Visit 2	17	GALLSTONES	gastrointestinal	Yes	Yes	12_025	03OCT16	03OCT2016					No										12	Entered	73	Male	14OCT16	258	MF4637	>=250 mg/day	Yes	No	>=250 mg/day	No	Yes	Yes	Yes	Yes
Visit 2	18	ALLERGIC RHINITIS	eyes, ears, nose, throat	Yes	Yes	12_025		2015					No										12	Entered	73	Male	14OCT16	258	MF4637	>=250 mg/day	Yes	No	>=250 mg/day	No	Yes	Yes	Yes	Yes
Visit 2	19	VITAMIN D DEFICIENCY	endocrine	Yes	Yes	12_025		2016					No										12	Entered	73	Male	14OCT16	258	MF4637	>=250 mg/day	Yes	No	>=250 mg/day	No	Yes	Yes	Yes	Yes
Visit 2	20	INSOMNIA	psychological	Yes	Yes	12_025		2014					No										12	Entered	73	Male	14OCT16	258	MF4637	>=250 mg/day	Yes	No	>=250 mg/day	No	Yes	Yes	Yes	Yes
Visit 2	21	MUSCLE PAIN	musculoskeletal	Yes	Yes	12_025		2000					No										12	Entered	73	Male	14OCT16	258	MF4637	>=250 mg/day	Yes	No	>=250 mg/day	No	Yes	Yes	Yes	Yes
Visit 2	22	WEAKNESS BOTH LEGS	musculoskeletal	Yes	Yes	12_025		2015					No										12	Entered	73	Male	14OCT16	258	MF4637	>=250 mg/day	Yes	No	>=250 mg/day	No	Yes	Yes	Yes	Yes
Visit 2	23	HISTORY OF FALLS	musculoskeletal	Yes	Yes	12_025		2015					No										12	Entered	73	Male	14OCT16	258	MF4637	>=250 mg/day	Yes	No	>=250 mg/day	No	Yes	Yes	Yes	Yes
Visit 1	1	HYPERTENSION	cardiovascular	Yes	Yes	12_027		2002				No		Yes	No	Yes		No			04OCT16	04OCT2016	12	Entered	56	Female	12OCT16	252	Placebo	<250 mg/day	No	Yes	<250 mg/day	No	Yes	Yes	Yes	Yes
Visit 1	2	DYSLIPIDEMIA	endocrine	Yes	Yes	12_027		2012				No		Yes	No	Yes		No			04OCT16	04OCT2016	12	Entered	56	Female	12OCT16	252	Placebo	<250 mg/day	No	Yes	<250 mg/day	No	Yes	Yes	Yes	Yes
Visit 1	3	RIGHT CATARACT	eyes, ears, nose, throat	Yes		12_027		2008		2009		No		Yes	No	Yes		No			04OCT16	04OCT2016	12	Entered	56	Female	12OCT16	252	Placebo	<250 mg/day	No	Yes	<250 mg/day	No	Yes	Yes	Yes	Yes
Visit 1	4	RIGHT CATARACT SURGERY	surgeries	Yes		12_027		2009		2009		No		Yes	No	Yes		No			04OCT16	04OCT2016	12	Entered	56	Female	12OCT16	252	Placebo	<250 mg/day	No	Yes	<250 mg/day	No	Yes	Yes	Yes	Yes
Visit 1	5	LUMBAR HERNIA	musculoskeletal	Yes	Yes	12_027		2015				No		Yes	No	Yes		No			04OCT16	04OCT2016	12	Entered	56	Female	12OCT16	252	Placebo	<250 mg/day	No	Yes	<250 mg/day	No	Yes	Yes	Yes	Yes
Visit 1	6	CHRONIC LOW BACK PAIN	musculoskeletal	Yes	Yes	12_027		2014				No		Yes	No	Yes		No			04OCT16	04OCT2016	12	Entered	56	Female	12OCT16	252	Placebo	<250 mg/day	No	Yes	<250 mg/day	No	Yes	Yes	Yes	Yes
Visit 1	7	ALLERGIC RHINITIS	allergies	Yes	Yes	12_027		2010				No		Yes	No	Yes		No			04OCT16	04OCT2016	12	Entered	56	Female	12OCT16	252	Placebo	<250 mg/day	No	Yes	<250 mg/day	No	Yes	Yes	Yes	Yes
Visit 1	8	INSOMNIA	psychological	Yes	Yes	12_027		2013				No		Yes	No	Yes		No			04OCT16	04OCT2016	12	Entered	56	Female	12OCT16	252	Placebo	<250 mg/day	No	Yes	<250 mg/day	No	Yes	Yes	Yes	Yes
Visit 1	9	POSTMENOPAUSAL	genital/urinary	Yes	Yes	12_027		2010				No		Yes	No	Yes		No			04OCT16	04OCT2016	12	Entered	56	Female	12OCT16	252	Placebo	<250 mg/day	No	Yes	<250 mg/day	No	Yes	Yes	Yes	Yes
Visit 1	10	OBESITY	endocrine	Yes	Yes	12_027		2010				No		Yes	No	Yes		No			04OCT16	04OCT2016	12	Entered	56	Female	12OCT16	252	Placebo	<250 mg/day	No	Yes	<250 mg/day	No	Yes	Yes	Yes	Yes
Visit 1	11	TUBAL LIGATION	surgeries	Yes		12_027		1987		1987		No		Yes	No	Yes		No			04OCT16	04OCT2016	12	Entered	56	Female	12OCT16	252	Placebo	<250 mg/day	No	Yes	<250 mg/day	No	Yes	Yes	Yes	Yes
Visit 1	12	CESAREAN SECTION	surgeries	Yes		12_027	03JAN83	03JAN1983	03JAN83	03JAN1983		No		Yes	No	Yes		No			04OCT16	04OCT2016	12	Entered	56	Female	12OCT16	252	Placebo	<250 mg/day	No	Yes	<250 mg/day	No	Yes	Yes	Yes	Yes
Visit 1	13	CESAREAN SECTION	surgeries	Yes		12_027	10FEB87	10FEB1987	10FEB87	10FEB1987		No		Yes	No	Yes		No			04OCT16	04OCT2016	12	Entered	56	Female	12OCT16	252	Placebo	<250 mg/day	No	Yes	<250 mg/day	No	Yes	Yes	Yes	Yes
Visit 1	14	CARPAL TUNNEL SYNDROME	musculoskeletal	Yes	Yes	12_027	10NOV15	10NOV2015				No		Yes	No	Yes		No			04OCT16	04OCT2016	12	Entered	56	Female	12OCT16	252	Placebo	<250 mg/day	No	Yes	<250 mg/day	No	Yes	Yes	Yes	Yes
Visit 1	15	CERVICAL REGION SPONDYLOSIS	musculoskeletal	Yes	Yes	12_027	10NOV15	10NOV2015				No		Yes	No	Yes		No			04OCT16	04OCT2016	12	Entered	56	Female	12OCT16	252	Placebo	<250 mg/day	No	Yes	<250 mg/day	No	Yes	Yes	Yes	Yes
Visit 1	16	CHICKENPOX	dermatological	Yes		12_027		1970		1970		No		Yes	No	Yes		No			04OCT16	04OCT2016	12	Entered	56	Female	12OCT16	252	Placebo	<250 mg/day	No	Yes	<250 mg/day	No	Yes	Yes	Yes	Yes
Visit 1	17	HEADACHES	neurological	Yes	Yes	12_027		2015				No		Yes	No	Yes		No			04OCT16	04OCT2016	12	Entered	56	Female	12OCT16	252	Placebo	<250 mg/day	No	Yes	<250 mg/day	No	Yes	Yes	Yes	Yes
Visit 1	18	CONTACT DERMATITIS	dermatological	Yes	Yes	12_027	29JUN16	29JUN2016				No		Yes	No	Yes		No			04OCT16	04OCT2016	12	Entered	56	Female	12OCT16	252	Placebo	<250 mg/day	No	Yes	<250 mg/day	No	Yes	Yes	Yes	Yes
Visit 1	19	VITAMIN D DEFICIENCY	endocrine	Yes	Yes	12_027	28SEP16	28SEP2016				No		Yes	No	Yes		No			04OCT16	04OCT2016	12	Entered	56	Female	12OCT16	252	Placebo	<250 mg/day	No	Yes	<250 mg/day	No	Yes	Yes	Yes	Yes
Visit 1	20	INTERVERTEBRAL DISC DISPLACEMENT LUMBAR REGION	musculoskeletal	Yes	Yes	12_027	28SEP16	28SEP2016				No		Yes	No	Yes		No			04OCT16	04OCT2016	12	Entered	56	Female	12OCT16	252	Placebo	<250 mg/day	No	Yes	<250 mg/day	No	Yes	Yes	Yes	Yes
Visit 1	21	DRY SKIN	dermatological	Yes	Yes	12_027	27OCT15	27OCT2015				No		Yes	No	Yes		No			04OCT16	04OCT2016	12	Entered	56	Female	12OCT16	252	Placebo	<250 mg/day	No	Yes	<250 mg/day	No	Yes	Yes	Yes	Yes
Visit 2	1	HYPERTENSION	cardiovascular	Yes	Yes	12_027		2002					No										12	Entered	56	Female	12OCT16	252	Placebo	<250 mg/day	No	Yes	<250 mg/day	No	Yes	Yes	Yes	Yes
Visit 2	2	DYSLIPIDEMIA	endocrine	Yes	Yes	12_027		2012					No										12	Entered	56	Female	12OCT16	252	Placebo	<250 mg/day	No	Yes	<250 mg/day	No	Yes	Yes	Yes	Yes
Visit 2	3	RIGHT CATARACT	eyes, ears, nose, throat	Yes		12_027		2008		2009			No										12	Entered	56	Female	12OCT16	252	Placebo	<250 mg/day	No	Yes	<250 mg/day	No	Yes	Yes	Yes	Yes
Visit 2	4	RIGHT CATARACT SURGERY	surgeries	Yes		12_027		2009		2009			No										12	Entered	56	Female	12OCT16	252	Placebo	<250 mg/day	No	Yes	<250 mg/day	No	Yes	Yes	Yes	Yes
Visit 2	5	LUMBAR HERNIA	musculoskeletal	Yes	Yes	12_027		2015					No										12	Entered	56	Female	12OCT16	252	Placebo	<250 mg/day	No	Yes	<250 mg/day	No	Yes	Yes	Yes	Yes
Visit 2	6	CHRONIC LOW BACK PAIN	musculoskeletal	Yes	Yes	12_027		2014					No										12	Entered	56	Female	12OCT16	252	Placebo	<250 mg/day	No	Yes	<250 mg/day	No	Yes	Yes	Yes	Yes
Visit 2	7	ALLERGIC RHINITIS	allergies	Yes	Yes	12_027		2010					No										12	Entered	56	Female	12OCT16	252	Placebo	<250 mg/day	No	Yes	<250 mg/day	No	Yes	Yes	Yes	Yes
Visit 2	8	INSOMNIA	psychological	Yes	Yes	12_027		2013					No										12	Entered	56	Female	12OCT16	252	Placebo	<250 mg/day	No	Yes	<250 mg/day	No	Yes	Yes	Yes	Yes
Visit 2	9	POSTMENOPAUSAL	genital/urinary	Yes	Yes	12_027		2010					No										12	Entered	56	Female	12OCT16	252	Placebo	<250 mg/day	No	Yes	<250 mg/day	No	Yes	Yes	Yes	Yes
Visit 2	10	OBESITY	endocrine	Yes	Yes	12_027		2010					No										12	Entered	56	Female	12OCT16	252	Placebo	<250 mg/day	No	Yes	<250 mg/day	No	Yes	Yes	Yes	Yes
Visit 2	11	TUBAL LIGATION	surgeries	Yes		12_027		1987		1987			No										12	Entered	56	Female	12OCT16	252	Placebo	<250 mg/day	No	Yes	<250 mg/day	No	Yes	Yes	Yes	Yes
Visit 2	12	CESAREAN SECTION	surgeries	Yes		12_027	03JAN83	03JAN1983	03JAN83	03JAN1983			No										12	Entered	56	Female	12OCT16	252	Placebo	<250 mg/day	No	Yes	<250 mg/day	No	Yes	Yes	Yes	Yes
Visit 2	13	CESAREAN SECTION	surgeries	Yes		12_027	10FEB87	10FEB1987	10FEB87	10FEB1987			No										12	Entered	56	Female	12OCT16	252	Placebo	<250 mg/day	No	Yes	<250 mg/day	No	Yes	Yes	Yes	Yes
Visit 2	14	CARPAL TUNNEL SYNDROME	musculoskeletal	Yes	Yes	12_027	10NOV15	10NOV2015					No										12	Entered	56	Female	12OCT16	252	Placebo	<250 mg/day	No	Yes	<250 mg/day	No	Yes	Yes	Yes	Yes
Visit 2	15	CERVICAL REGION SPONDYLOSIS	musculoskeletal	Yes	Yes	12_027	10NOV15	10NOV2015					No										12	Entered	56	Female	12OCT16	252	Placebo	<250 mg/day	No	Yes	<250 mg/day	No	Yes	Yes	Yes	Yes
Visit 2	16	CHICKENPOX	dermatological	Yes		12_027		1970		1970			No										12	Entered	56	Female	12OCT16	252	Placebo	<250 mg/day	No	Yes	<250 mg/day	No	Yes	Yes	Yes	Yes
Visit 2	17	HEADACHES	neurological	Yes	Yes	12_027		2015					No										12	Entered	56	Female	12OCT16	252	Placebo	<250 mg/day	No	Yes	<250 mg/day	No	Yes	Yes	Yes	Yes
Visit 2	18	CONTACT DERMATITIS	dermatological	Yes	Yes	12_027	29JUN16	29JUN2016					No										12	Entered	56	Female	12OCT16	252	Placebo	<250 mg/day	No	Yes	<250 mg/day	No	Yes	Yes	Yes	Yes
Visit 2	19	VITAMIN D DEFICIENCY	endocrine	Yes	Yes	12_027	28SEP16	28SEP2016					No										12	Entered	56	Female	12OCT16	252	Placebo	<250 mg/day	No	Yes	<250 mg/day	No	Yes	Yes	Yes	Yes
Visit 2	20	INTERVERTEBRAL DISC DISPLACEMENT LUMBAR REGION	musculoskeletal	Yes	Yes	12_027	28SEP16	28SEP2016					No										12	Entered	56	Female	12OCT16	252	Placebo	<250 mg/day	No	Yes	<250 mg/day	No	Yes	Yes	Yes	Yes
Visit 2	21	DRY SKIN	dermatological	Yes	Yes	12_027	27OCT15	27OCT2015					No										12	Entered	56	Female	12OCT16	252	Placebo	<250 mg/day	No	Yes	<250 mg/day	No	Yes	Yes	Yes	Yes
Visit 1	1	RHINITS	eyes, ears, nose, throat	Yes	Yes	12_028		2000				Yes		Yes	No	Yes		No			04OCT16	04OCT2016	12	Entered	71	Female	14OCT16	259	Placebo	<250 mg/day	Yes	Yes	<250 mg/day	No	Yes	Yes	Yes	Yes
Visit 1	2	OSTEOARTHRITIS	musculoskeletal	Yes	Yes	12_028		1995				Yes		Yes	No	Yes		No			04OCT16	04OCT2016	12	Entered	71	Female	14OCT16	259	Placebo	<250 mg/day	Yes	Yes	<250 mg/day	No	Yes	Yes	Yes	Yes
Visit 1	3	DIABETIC NEUROPATHY	neurological	Yes	Yes	12_028		2013				Yes		Yes	No	Yes		No			04OCT16	04OCT2016	12	Entered	71	Female	14OCT16	259	Placebo	<250 mg/day	Yes	Yes	<250 mg/day	No	Yes	Yes	Yes	Yes
Visit 1	4	GLAUCOMA	eyes, ears, nose, throat	Yes	Yes	12_028		2015				Yes		Yes	No	Yes		No			04OCT16	04OCT2016	12	Entered	71	Female	14OCT16	259	Placebo	<250 mg/day	Yes	Yes	<250 mg/day	No	Yes	Yes	Yes	Yes
Visit 1	5	MEMORY LOSS	neurological	Yes	Yes	12_028		2014				Yes		Yes	No	Yes		No			04OCT16	04OCT2016	12	Entered	71	Female	14OCT16	259	Placebo	<250 mg/day	Yes	Yes	<250 mg/day	No	Yes	Yes	Yes	Yes
Visit 1	6	HYPERTENSION	cardiovascular	Yes	Yes	12_028		1995				Yes		Yes	No	Yes		No			04OCT16	04OCT2016	12	Entered	71	Female	14OCT16	259	Placebo	<250 mg/day	Yes	Yes	<250 mg/day	No	Yes	Yes	Yes	Yes
Visit 1	7	DIABETES MELLITUS TYPE II	endocrine	Yes	Yes	12_028		1995				Yes		Yes	No	Yes		No			04OCT16	04OCT2016	12	Entered	71	Female	14OCT16	259	Placebo	<250 mg/day	Yes	Yes	<250 mg/day	No	Yes	Yes	Yes	Yes
Visit 1	8	DYSLIPIDEMIA	endocrine	Yes	Yes	12_028		1995				Yes		Yes	No	Yes		No			04OCT16	04OCT2016	12	Entered	71	Female	14OCT16	259	Placebo	<250 mg/day	Yes	Yes	<250 mg/day	No	Yes	Yes	Yes	Yes
Visit 1	9	ASTHMA	eyes, ears, nose, throat	Yes	Yes	12_028		2000				Yes		Yes	No	Yes		No			04OCT16	04OCT2016	12	Entered	71	Female	14OCT16	259	Placebo	<250 mg/day	Yes	Yes	<250 mg/day	No	Yes	Yes	Yes	Yes
Visit 1	10	POSTMENOPAUSAL	genital/urinary	Yes	Yes	12_028		1985				Yes		Yes	No	Yes		No			04OCT16	04OCT2016	12	Entered	71	Female	14OCT16	259	Placebo	<250 mg/day	Yes	Yes	<250 mg/day	No	Yes	Yes	Yes	Yes
Visit 1	11	CESAREAN SECTION	surgeries	Yes		12_028	30JAN68	30JAN1968	30JAN68	30JAN1968		Yes		Yes	No	Yes		No			04OCT16	04OCT2016	12	Entered	71	Female	14OCT16	259	Placebo	<250 mg/day	Yes	Yes	<250 mg/day	No	Yes	Yes	Yes	Yes
Visit 1	12	CESAREAN SECTION	surgeries	Yes		12_028	24AUG70	24AUG1970	24AUG70	24AUG1970		Yes		Yes	No	Yes		No			04OCT16	04OCT2016	12	Entered	71	Female	14OCT16	259	Placebo	<250 mg/day	Yes	Yes	<250 mg/day	No	Yes	Yes	Yes	Yes
Visit 1	13	CESAREAN SECTION	surgeries	Yes		12_028	15JUL72	15JUL1972	15JUL72	15JUL1972		Yes		Yes	No	Yes		No			04OCT16	04OCT2016	12	Entered	71	Female	14OCT16	259	Placebo	<250 mg/day	Yes	Yes	<250 mg/day	No	Yes	Yes	Yes	Yes
Visit 1	14	TUBAL LIGATION	surgeries	Yes		12_028	15JUL72	15JUL1972	15JUL72	15JUL1972		Yes		Yes	No	Yes		No			04OCT16	04OCT2016	12	Entered	71	Female	14OCT16	259	Placebo	<250 mg/day	Yes	Yes	<250 mg/day	No	Yes	Yes	Yes	Yes
Visit 1	15	BILATERAL CATARACT SURGERY	surgeries	Yes		12_028		2005		2005		Yes		Yes	No	Yes		No			04OCT16	04OCT2016	12	Entered	71	Female	14OCT16	259	Placebo	<250 mg/day	Yes	Yes	<250 mg/day	No	Yes	Yes	Yes	Yes
Visit 1	16	PENICILLIN ALLERGY	allergies	Yes	Yes	12_028		1965				Yes		Yes	No	Yes		No			04OCT16	04OCT2016	12	Entered	71	Female	14OCT16	259	Placebo	<250 mg/day	Yes	Yes	<250 mg/day	No	Yes	Yes	Yes	Yes
Visit 1	17	URINARY INCONTINENCE	genital/urinary	Yes	Yes	12_028		2005				Yes		Yes	No	Yes		No			04OCT16	04OCT2016	12	Entered	71	Female	14OCT16	259	Placebo	<250 mg/day	Yes	Yes	<250 mg/day	No	Yes	Yes	Yes	Yes
Visit 1	18	OVERWEIGHT	endocrine	Yes	Yes	12_028		2000				Yes		Yes	No	Yes		No			04OCT16	04OCT2016	12	Entered	71	Female	14OCT16	259	Placebo	<250 mg/day	Yes	Yes	<250 mg/day	No	Yes	Yes	Yes	Yes
Visit 1	19	INSOMNIA	psychological	Yes	Yes	12_028		2006				Yes		Yes	No	Yes		No			04OCT16	04OCT2016	12	Entered	71	Female	14OCT16	259	Placebo	<250 mg/day	Yes	Yes	<250 mg/day	No	Yes	Yes	Yes	Yes
Visit 1	20	ANXIETY	psychological	Yes	Yes	12_028		2006				Yes		Yes	No	Yes		No			04OCT16	04OCT2016	12	Entered	71	Female	14OCT16	259	Placebo	<250 mg/day	Yes	Yes	<250 mg/day	No	Yes	Yes	Yes	Yes
Visit 1	21	DEPRESSION	psychological	Yes	Yes	12_028		2006				Yes		Yes	No	Yes		No			04OCT16	04OCT2016	12	Entered	71	Female	14OCT16	259	Placebo	<250 mg/day	Yes	Yes	<250 mg/day	No	Yes	Yes	Yes	Yes
Visit 1	22	BILATERAL FEET DERMATITIS	dermatological	Yes	Yes	12_028		01UNK2016				Yes		Yes	No	Yes		No			04OCT16	04OCT2016	12	Entered	71	Female	14OCT16	259	Placebo	<250 mg/day	Yes	Yes	<250 mg/day	No	Yes	Yes	Yes	Yes
Visit 1	23	CHRONIC OBSTRUCTIVE PULMONARY DISEASE	eyes, ears, nose, throat	Yes	Yes	12_028		2000				Yes		Yes	No	Yes		No			04OCT16	04OCT2016	12	Entered	71	Female	14OCT16	259	Placebo	<250 mg/day	Yes	Yes	<250 mg/day	No	Yes	Yes	Yes	Yes
Visit 1	24	GASTROESOPHAGEAL REFLUX DISEASE	gastrointestinal	Yes	Yes	12_028		2016				Yes		Yes	No	Yes		No			04OCT16	04OCT2016	12	Entered	71	Female	14OCT16	259	Placebo	<250 mg/day	Yes	Yes	<250 mg/day	No	Yes	Yes	Yes	Yes
Visit 1	25	BACK PAIN	musculoskeletal	Yes	Yes	12_028		1995				Yes		Yes	No	Yes		No			04OCT16	04OCT2016	12	Entered	71	Female	14OCT16	259	Placebo	<250 mg/day	Yes	Yes	<250 mg/day	No	Yes	Yes	Yes	Yes
Visit 1	26	DEGENERATIVE DISC DISEASE	musculoskeletal	Yes	Yes	12_028		1995				Yes		Yes	No	Yes		No			04OCT16	04OCT2016	12	Entered	71	Female	14OCT16	259	Placebo	<250 mg/day	Yes	Yes	<250 mg/day	No	Yes	Yes	Yes	Yes
Visit 1	27	MITRAL INSUFFICIENCY	cardiovascular	Yes	Yes	12_028		2014				Yes		Yes	No	Yes		No			04OCT16	04OCT2016	12	Entered	71	Female	14OCT16	259	Placebo	<250 mg/day	Yes	Yes	<250 mg/day	No	Yes	Yes	Yes	Yes
Visit 1	28	AORTIC INSUFFICIENCY	cardiovascular	Yes	Yes	12_028		2014				Yes		Yes	No	Yes		No			04OCT16	04OCT2016	12	Entered	71	Female	14OCT16	259	Placebo	<250 mg/day	Yes	Yes	<250 mg/day	No	Yes	Yes	Yes	Yes
Visit 1	29	IRON DEFICIENCY ANEMIA	blood/bleeding disorders	Yes	Yes	12_028		2015				Yes		Yes	No	Yes		No			04OCT16	04OCT2016	12	Entered	71	Female	14OCT16	259	Placebo	<250 mg/day	Yes	Yes	<250 mg/day	No	Yes	Yes	Yes	Yes
Visit 1	30	VITAMIN B12 DEFICIENCY	endocrine	Yes	Yes	12_028		2015				Yes		Yes	No	Yes		No			04OCT16	04OCT2016	12	Entered	71	Female	14OCT16	259	Placebo	<250 mg/day	Yes	Yes	<250 mg/day	No	Yes	Yes	Yes	Yes
Visit 1	31	VERTIGO	neurological	Yes	Yes	12_028		2015				Yes		Yes	No	Yes		No			04OCT16	04OCT2016	12	Entered	71	Female	14OCT16	259	Placebo	<250 mg/day	Yes	Yes	<250 mg/day	No	Yes	Yes	Yes	Yes
Visit 1	32	PTOSIS EYELID	eyes, ears, nose, throat	Yes		12_028		2012		2014		Yes		Yes	No	Yes		No			04OCT16	04OCT2016	12	Entered	71	Female	14OCT16	259	Placebo	<250 mg/day	Yes	Yes	<250 mg/day	No	Yes	Yes	Yes	Yes
Visit 1	33	PTOSIS EYELID SURGERY	surgeries	Yes		12_028		2014		2014		Yes		Yes	No	Yes		No			04OCT16	04OCT2016	12	Entered	71	Female	14OCT16	259	Placebo	<250 mg/day	Yes	Yes	<250 mg/day	No	Yes	Yes	Yes	Yes
Visit 1	34	CYSTITIS	genital/urinary	Yes		12_028		JUL2016		AUG2016		Yes		Yes	No	Yes		No			04OCT16	04OCT2016	12	Entered	71	Female	14OCT16	259	Placebo	<250 mg/day	Yes	Yes	<250 mg/day	No	Yes	Yes	Yes	Yes
Visit 2	1	RHINITS	eyes, ears, nose, throat	Yes	Yes	12_028		2000					No										12	Entered	71	Female	14OCT16	259	Placebo	<250 mg/day	Yes	Yes	<250 mg/day	No	Yes	Yes	Yes	Yes
Visit 2	2	OSTEOARTHRITIS	musculoskeletal	Yes	Yes	12_028		1995					No										12	Entered	71	Female	14OCT16	259	Placebo	<250 mg/day	Yes	Yes	<250 mg/day	No	Yes	Yes	Yes	Yes
Visit 2	3	DIABETIC NEUROPATHY	neurological	Yes	Yes	12_028		2013					No										12	Entered	71	Female	14OCT16	259	Placebo	<250 mg/day	Yes	Yes	<250 mg/day	No	Yes	Yes	Yes	Yes
Visit 2	4	GLAUCOMA	eyes, ears, nose, throat	Yes	Yes	12_028		2015					No										12	Entered	71	Female	14OCT16	259	Placebo	<250 mg/day	Yes	Yes	<250 mg/day	No	Yes	Yes	Yes	Yes
Visit 2	5	MEMORY LOSS	neurological	Yes	Yes	12_028		2014					No										12	Entered	71	Female	14OCT16	259	Placebo	<250 mg/day	Yes	Yes	<250 mg/day	No	Yes	Yes	Yes	Yes
Visit 2	6	HYPERTENSION	cardiovascular	Yes	Yes	12_028		1995					No										12	Entered	71	Female	14OCT16	259	Placebo	<250 mg/day	Yes	Yes	<250 mg/day	No	Yes	Yes	Yes	Yes
Visit 2	7	DIABETES MELLITUS TYPE II	endocrine	Yes	Yes	12_028		1995					No										12	Entered	71	Female	14OCT16	259	Placebo	<250 mg/day	Yes	Yes	<250 mg/day	No	Yes	Yes	Yes	Yes
Visit 2	8	DYSLIPIDEMIA	endocrine	Yes	Yes	12_028		1995					No										12	Entered	71	Female	14OCT16	259	Placebo	<250 mg/day	Yes	Yes	<250 mg/day	No	Yes	Yes	Yes	Yes
Visit 2	9	ASTHMA	eyes, ears, nose, throat	Yes	Yes	12_028		2000					No										12	Entered	71	Female	14OCT16	259	Placebo	<250 mg/day	Yes	Yes	<250 mg/day	No	Yes	Yes	Yes	Yes
Visit 2	10	POSTMENOPAUSAL	genital/urinary	Yes	Yes	12_028		1985					No										12	Entered	71	Female	14OCT16	259	Placebo	<250 mg/day	Yes	Yes	<250 mg/day	No	Yes	Yes	Yes	Yes
Visit 2	11	CESAREAN SECTION	surgeries	Yes		12_028	30JAN68	30JAN1968	30JAN68	30JAN1968			No										12	Entered	71	Female	14OCT16	259	Placebo	<250 mg/day	Yes	Yes	<250 mg/day	No	Yes	Yes	Yes	Yes
Visit 2	12	CESAREAN SECTION	surgeries	Yes		12_028	24AUG70	24AUG1970	24AUG70	24AUG1970			No										12	Entered	71	Female	14OCT16	259	Placebo	<250 mg/day	Yes	Yes	<250 mg/day	No	Yes	Yes	Yes	Yes
Visit 2	13	CESAREAN SECTION	surgeries	Yes		12_028	15JUL72	15JUL1972	15JUL72	15JUL1972			No										12	Entered	71	Female	14OCT16	259	Placebo	<250 mg/day	Yes	Yes	<250 mg/day	No	Yes	Yes	Yes	Yes
Visit 2	14	TUBAL LIGATION	surgeries	Yes		12_028	15JUL72	15JUL1972	15JUL72	15JUL1972			No										12	Entered	71	Female	14OCT16	259	Placebo	<250 mg/day	Yes	Yes	<250 mg/day	No	Yes	Yes	Yes	Yes
Visit 2	15	BILATERAL CATARACT SURGERY	surgeries	Yes		12_028		2005		2005			No										12	Entered	71	Female	14OCT16	259	Placebo	<250 mg/day	Yes	Yes	<250 mg/day	No	Yes	Yes	Yes	Yes
Visit 2	16	PENICILLIN ALLERGY	allergies	Yes	Yes	12_028		1965					No										12	Entered	71	Female	14OCT16	259	Placebo	<250 mg/day	Yes	Yes	<250 mg/day	No	Yes	Yes	Yes	Yes
Visit 2	17	URINARY INCONTINENCE	genital/urinary	Yes	Yes	12_028		2005					No										12	Entered	71	Female	14OCT16	259	Placebo	<250 mg/day	Yes	Yes	<250 mg/day	No	Yes	Yes	Yes	Yes
Visit 2	18	OVERWEIGHT	endocrine	Yes	Yes	12_028		2000					No										12	Entered	71	Female	14OCT16	259	Placebo	<250 mg/day	Yes	Yes	<250 mg/day	No	Yes	Yes	Yes	Yes
Visit 2	19	INSOMNIA	psychological	Yes	Yes	12_028		2006					No										12	Entered	71	Female	14OCT16	259	Placebo	<250 mg/day	Yes	Yes	<250 mg/day	No	Yes	Yes	Yes	Yes
Visit 2	20	ANXIETY	psychological	Yes	Yes	12_028		2006					No										12	Entered	71	Female	14OCT16	259	Placebo	<250 mg/day	Yes	Yes	<250 mg/day	No	Yes	Yes	Yes	Yes
Visit 2	21	DEPRESSION	psychological	Yes	Yes	12_028		2006					No										12	Entered	71	Female	14OCT16	259	Placebo	<250 mg/day	Yes	Yes	<250 mg/day	No	Yes	Yes	Yes	Yes
Visit 2	22	BILATERAL FEET DERMATITIS	dermatological	Yes	Yes	12_028		01UNK2016					No										12	Entered	71	Female	14OCT16	259	Placebo	<250 mg/day	Yes	Yes	<250 mg/day	No	Yes	Yes	Yes	Yes
Visit 2	23	CHRONIC OBSTRUCTIVE PULMONARY DISEASE	eyes, ears, nose, throat	Yes	Yes	12_028		2000					No										12	Entered	71	Female	14OCT16	259	Placebo	<250 mg/day	Yes	Yes	<250 mg/day	No	Yes	Yes	Yes	Yes
Visit 2	24	GASTROESOPHAGEAL REFLUX DISEASE	gastrointestinal	Yes	Yes	12_028		2016					No										12	Entered	71	Female	14OCT16	259	Placebo	<250 mg/day	Yes	Yes	<250 mg/day	No	Yes	Yes	Yes	Yes
Visit 2	25	BACK PAIN	musculoskeletal	Yes	Yes	12_028		1995					No										12	Entered	71	Female	14OCT16	259	Placebo	<250 mg/day	Yes	Yes	<250 mg/day	No	Yes	Yes	Yes	Yes
Visit 2	26	DEGENERATIVE DISC DISEASE	musculoskeletal	Yes	Yes	12_028		1995					No										12	Entered	71	Female	14OCT16	259	Placebo	<250 mg/day	Yes	Yes	<250 mg/day	No	Yes	Yes	Yes	Yes
Visit 2	27	MITRAL INSUFFICIENCY	cardiovascular	Yes	Yes	12_028		2014					No										12	Entered	71	Female	14OCT16	259	Placebo	<250 mg/day	Yes	Yes	<250 mg/day	No	Yes	Yes	Yes	Yes
Visit 2	28	AORTIC INSUFFICIENCY	cardiovascular	Yes	Yes	12_028		2014					No										12	Entered	71	Female	14OCT16	259	Placebo	<250 mg/day	Yes	Yes	<250 mg/day	No	Yes	Yes	Yes	Yes
Visit 2	29	IRON DEFICIENCY ANEMIA	blood/bleeding disorders	Yes	Yes	12_028		2015					No										12	Entered	71	Female	14OCT16	259	Placebo	<250 mg/day	Yes	Yes	<250 mg/day	No	Yes	Yes	Yes	Yes
Visit 2	30	VITAMIN B12 DEFICIENCY	endocrine	Yes	Yes	12_028		2015					No										12	Entered	71	Female	14OCT16	259	Placebo	<250 mg/day	Yes	Yes	<250 mg/day	No	Yes	Yes	Yes	Yes
Visit 2	31	VERTIGO	neurological	Yes	Yes	12_028		2015					No										12	Entered	71	Female	14OCT16	259	Placebo	<250 mg/day	Yes	Yes	<250 mg/day	No	Yes	Yes	Yes	Yes
Visit 2	32	PTOSIS EYELID	eyes, ears, nose, throat	Yes		12_028		2012		2014			No										12	Entered	71	Female	14OCT16	259	Placebo	<250 mg/day	Yes	Yes	<250 mg/day	No	Yes	Yes	Yes	Yes
Visit 2	33	PTOSIS EYELID SURGERY	surgeries	Yes		12_028		2014		2014			No										12	Entered	71	Female	14OCT16	259	Placebo	<250 mg/day	Yes	Yes	<250 mg/day	No	Yes	Yes	Yes	Yes
Visit 2	34	CYSTITIS	genital/urinary	Yes		12_028		07UNK2016		08UNK2016			No										12	Entered	71	Female	14OCT16	259	Placebo	<250 mg/day	Yes	Yes	<250 mg/day	No	Yes	Yes	Yes	Yes
Visit 1	1	DIABETES MELLITUS TYPE II	endocrine	Yes	Yes	12_029		2008				Yes		Yes	No	Yes		No			05OCT16	05OCT2016	12	Entered	72	Male	12OCT16	256	Placebo	>=250 mg/day	Yes	Yes	>=250 mg/day	No	Yes	Yes	Yes	Yes
Visit 1	2	HYPERTENSION	cardiovascular	Yes	Yes	12_029		2008				Yes		Yes	No	Yes		No			05OCT16	05OCT2016	12	Entered	72	Male	12OCT16	256	Placebo	>=250 mg/day	Yes	Yes	>=250 mg/day	No	Yes	Yes	Yes	Yes
Visit 1	3	DYSLIPIDEMIA	endocrine	Yes	Yes	12_029		2008				Yes		Yes	No	Yes		No			05OCT16	05OCT2016	12	Entered	72	Male	12OCT16	256	Placebo	>=250 mg/day	Yes	Yes	>=250 mg/day	No	Yes	Yes	Yes	Yes
Visit 1	4	OSTEOARTHRITIS	musculoskeletal	Yes	Yes	12_029		2005				Yes		Yes	No	Yes		No			05OCT16	05OCT2016	12	Entered	72	Male	12OCT16	256	Placebo	>=250 mg/day	Yes	Yes	>=250 mg/day	No	Yes	Yes	Yes	Yes
Visit 1	5	BENIGN PROSTATIC HYPERTROPHY	genital/urinary	Yes	Yes	12_029		2011				Yes		Yes	No	Yes		No			05OCT16	05OCT2016	12	Entered	72	Male	12OCT16	256	Placebo	>=250 mg/day	Yes	Yes	>=250 mg/day	No	Yes	Yes	Yes	Yes
Visit 1	6	BILATERAL CATARACT	eyes, ears, nose, throat	Yes		12_029		2011		2011		Yes		Yes	No	Yes		No			05OCT16	05OCT2016	12	Entered	72	Male	12OCT16	256	Placebo	>=250 mg/day	Yes	Yes	>=250 mg/day	No	Yes	Yes	Yes	Yes
Visit 1	7	BILATERAL CATARACT SURGERY	surgeries	Yes		12_029		2011		2011		Yes		Yes	No	Yes		No			05OCT16	05OCT2016	12	Entered	72	Male	12OCT16	256	Placebo	>=250 mg/day	Yes	Yes	>=250 mg/day	No	Yes	Yes	Yes	Yes
Visit 1	8	CHOLECYSTITIS	gastrointestinal	Yes		12_029		2014		2014		Yes		Yes	No	Yes		No			05OCT16	05OCT2016	12	Entered	72	Male	12OCT16	256	Placebo	>=250 mg/day	Yes	Yes	>=250 mg/day	No	Yes	Yes	Yes	Yes
Visit 1	9	CHOLECYSTECTOMY	gastrointestinal	Yes		12_029		2014		2014		Yes		Yes	No	Yes		No			05OCT16	05OCT2016	12	Entered	72	Male	12OCT16	256	Placebo	>=250 mg/day	Yes	Yes	>=250 mg/day	No	Yes	Yes	Yes	Yes
Visit 1	10	OVERWEIGHT	endocrine	Yes	Yes	12_029		2012				Yes		Yes	No	Yes		No			05OCT16	05OCT2016	12	Entered	72	Male	12OCT16	256	Placebo	>=250 mg/day	Yes	Yes	>=250 mg/day	No	Yes	Yes	Yes	Yes
Visit 2	1	DIABETES MELLITUS TYPE II	endocrine	Yes	Yes	12_029		2008					No										12	Entered	72	Male	12OCT16	256	Placebo	>=250 mg/day	Yes	Yes	>=250 mg/day	No	Yes	Yes	Yes	Yes
Visit 2	2	HYPERTENSION	cardiovascular	Yes	Yes	12_029		2008					No										12	Entered	72	Male	12OCT16	256	Placebo	>=250 mg/day	Yes	Yes	>=250 mg/day	No	Yes	Yes	Yes	Yes
Visit 2	3	DYSLIPIDEMIA	endocrine	Yes	Yes	12_029		2008					No										12	Entered	72	Male	12OCT16	256	Placebo	>=250 mg/day	Yes	Yes	>=250 mg/day	No	Yes	Yes	Yes	Yes
Visit 2	4	OSTEOARTHRITIS	musculoskeletal	Yes	Yes	12_029		2005					No										12	Entered	72	Male	12OCT16	256	Placebo	>=250 mg/day	Yes	Yes	>=250 mg/day	No	Yes	Yes	Yes	Yes
Visit 2	5	BENIGN PROSTATIC HYPERTROPHY	genital/urinary	Yes	Yes	12_029		2011					No										12	Entered	72	Male	12OCT16	256	Placebo	>=250 mg/day	Yes	Yes	>=250 mg/day	No	Yes	Yes	Yes	Yes
Visit 2	6	BILATERAL CATARACT	eyes, ears, nose, throat	Yes		12_029		2011		2011			No										12	Entered	72	Male	12OCT16	256	Placebo	>=250 mg/day	Yes	Yes	>=250 mg/day	No	Yes	Yes	Yes	Yes
Visit 2	7	BILATERAL CATARACT SURGERY	surgeries	Yes		12_029		2011		2011			No										12	Entered	72	Male	12OCT16	256	Placebo	>=250 mg/day	Yes	Yes	>=250 mg/day	No	Yes	Yes	Yes	Yes
Visit 2	8	CHOLECYSTITIS	gastrointestinal	Yes		12_029		2014		2014			No										12	Entered	72	Male	12OCT16	256	Placebo	>=250 mg/day	Yes	Yes	>=250 mg/day	No	Yes	Yes	Yes	Yes
Visit 2	9	CHOLECYSTECTOMY	gastrointestinal	Yes		12_029		2014		2014			No										12	Entered	72	Male	12OCT16	256	Placebo	>=250 mg/day	Yes	Yes	>=250 mg/day	No	Yes	Yes	Yes	Yes
Visit 2	10	OVERWEIGHT	endocrine	Yes	Yes	12_029		2012					No										12	Entered	72	Male	12OCT16	256	Placebo	>=250 mg/day	Yes	Yes	>=250 mg/day	No	Yes	Yes	Yes	Yes
Visit 1	1	OBESITY	endocrine	Yes	Yes	12_030		2008				Yes		Yes	No	Yes		No			05OCT16	05OCT2016	12	Entered	56	Male	12OCT16	255	MF4637	<250 mg/day	Yes	Yes	<250 mg/day	No	Yes	Yes	Yes	Yes
Visit 1	2	DIABETES MELLITUS TYPE II	endocrine	Yes	Yes	12_030		02UNK2015				Yes		Yes	No	Yes		No			05OCT16	05OCT2016	12	Entered	56	Male	12OCT16	255	MF4637	<250 mg/day	Yes	Yes	<250 mg/day	No	Yes	Yes	Yes	Yes
Visit 1	3	MOTOR VEHICLE ACCIDENT	musculoskeletal	Yes		12_030		1989		1989		Yes		Yes	No	Yes		No			05OCT16	05OCT2016	12	Entered	56	Male	12OCT16	255	MF4637	<250 mg/day	Yes	Yes	<250 mg/day	No	Yes	Yes	Yes	Yes
Visit 1	4	ALLERGIC TO SHRIMP	allergies	Yes	Yes	12_030		1985				Yes		Yes	No	Yes		No			05OCT16	05OCT2016	12	Entered	56	Male	12OCT16	255	MF4637	<250 mg/day	Yes	Yes	<250 mg/day	No	Yes	Yes	Yes	Yes
Visit 1	5	BILATERAL PTERYGIUM	eyes, ears, nose, throat	Yes	Yes	12_030		2013				Yes		Yes	No	Yes		No			05OCT16	05OCT2016	12	Entered	56	Male	12OCT16	255	MF4637	<250 mg/day	Yes	Yes	<250 mg/day	No	Yes	Yes	Yes	Yes
Visit 1	6	BILATERAL ELBOW DISLOCATION	musculoskeletal	Yes		12_030		1989		1989		Yes		Yes	No	Yes		No			05OCT16	05OCT2016	12	Entered	56	Male	12OCT16	255	MF4637	<250 mg/day	Yes	Yes	<250 mg/day	No	Yes	Yes	Yes	Yes
Visit 1	7	BILATERAL ELBOW REPAIR SURGERY	surgeries	Yes		12_030		1989		1989		Yes		Yes	No	Yes		No			05OCT16	05OCT2016	12	Entered	56	Male	12OCT16	255	MF4637	<250 mg/day	Yes	Yes	<250 mg/day	No	Yes	Yes	Yes	Yes
Visit 1	8	BENIGN PROSTATIC HYPERPLASIA	genital/urinary	Yes	Yes	12_030		08UNK2015				Yes		Yes	No	Yes		No			05OCT16	05OCT2016	12	Entered	56	Male	12OCT16	255	MF4637	<250 mg/day	Yes	Yes	<250 mg/day	No	Yes	Yes	Yes	Yes
Visit 1	9	NEPHROLITHIASIS	genital/urinary	Yes	Yes	12_030		2014				Yes		Yes	No	Yes		No			05OCT16	05OCT2016	12	Entered	56	Male	12OCT16	255	MF4637	<250 mg/day	Yes	Yes	<250 mg/day	No	Yes	Yes	Yes	Yes
Visit 1	10	LOW BACK PAIN	musculoskeletal	Yes	Yes	12_030		10UNK2015				Yes		Yes	No	Yes		No			05OCT16	05OCT2016	12	Entered	56	Male	12OCT16	255	MF4637	<250 mg/day	Yes	Yes	<250 mg/day	No	Yes	Yes	Yes	Yes
Visit 1	11	DYSLIPIDEMIA	endocrine	Yes	Yes	12_030		2008				Yes		Yes	No	Yes		No			05OCT16	05OCT2016	12	Entered	56	Male	12OCT16	255	MF4637	<250 mg/day	Yes	Yes	<250 mg/day	No	Yes	Yes	Yes	Yes
Visit 1	12	DEPRESSION	psychological	Yes	Yes	12_030		2015				Yes		Yes	No	Yes		No			05OCT16	05OCT2016	12	Entered	56	Male	12OCT16	255	MF4637	<250 mg/day	Yes	Yes	<250 mg/day	No	Yes	Yes	Yes	Yes
Visit 2	1	OBESITY	endocrine	Yes	Yes	12_030		2008					No										12	Entered	56	Male	12OCT16	255	MF4637	<250 mg/day	Yes	Yes	<250 mg/day	No	Yes	Yes	Yes	Yes
Visit 2	2	DIABETES MELLITUS TYPE II	endocrine	Yes	Yes	12_030		02UNK2015					No										12	Entered	56	Male	12OCT16	255	MF4637	<250 mg/day	Yes	Yes	<250 mg/day	No	Yes	Yes	Yes	Yes
Visit 2	3	MOTOR VEHICLE ACCIDENT	musculoskeletal	Yes		12_030		1989		1989			No										12	Entered	56	Male	12OCT16	255	MF4637	<250 mg/day	Yes	Yes	<250 mg/day	No	Yes	Yes	Yes	Yes
Visit 2	4	ALLERGIC TO SHRIMP	allergies	Yes	Yes	12_030		1985					No										12	Entered	56	Male	12OCT16	255	MF4637	<250 mg/day	Yes	Yes	<250 mg/day	No	Yes	Yes	Yes	Yes
Visit 2	5	BILATERAL PTERYGIUM	eyes, ears, nose, throat	Yes	Yes	12_030		2013					No										12	Entered	56	Male	12OCT16	255	MF4637	<250 mg/day	Yes	Yes	<250 mg/day	No	Yes	Yes	Yes	Yes
Visit 2	6	BILATERAL ELBOW DISLOCATION	musculoskeletal	Yes		12_030		1989		1989			No										12	Entered	56	Male	12OCT16	255	MF4637	<250 mg/day	Yes	Yes	<250 mg/day	No	Yes	Yes	Yes	Yes
Visit 2	7	BILATERAL ELBOW REPAIR SURGERY	surgeries	Yes		12_030		1989		1989			No										12	Entered	56	Male	12OCT16	255	MF4637	<250 mg/day	Yes	Yes	<250 mg/day	No	Yes	Yes	Yes	Yes
Visit 2	8	BENIGN PROSTATIC HYPERPLASIA	genital/urinary	Yes	Yes	12_030		08UNK2015					No										12	Entered	56	Male	12OCT16	255	MF4637	<250 mg/day	Yes	Yes	<250 mg/day	No	Yes	Yes	Yes	Yes
Visit 2	9	NEPHROLITHIASIS	genital/urinary	Yes	Yes	12_030		2014					No										12	Entered	56	Male	12OCT16	255	MF4637	<250 mg/day	Yes	Yes	<250 mg/day	No	Yes	Yes	Yes	Yes
Visit 2	10	LOW BACK PAIN	musculoskeletal	Yes	Yes	12_030		10UNK2015					No										12	Entered	56	Male	12OCT16	255	MF4637	<250 mg/day	Yes	Yes	<250 mg/day	No	Yes	Yes	Yes	Yes
Visit 2	11	DYSLIPIDEMIA	endocrine	Yes	Yes	12_030		2008					No										12	Entered	56	Male	12OCT16	255	MF4637	<250 mg/day	Yes	Yes	<250 mg/day	No	Yes	Yes	Yes	Yes
Visit 2	12	DEPRESSION	psychological	Yes	Yes	12_030		2015					No										12	Entered	56	Male	12OCT16	255	MF4637	<250 mg/day	Yes	Yes	<250 mg/day	No	Yes	Yes	Yes	Yes
Visit 1	1	DIABETES MELLITUS TYPE II	endocrine	Yes	Yes	12_032		2007				Yes		Yes	No	Yes		No			05OCT16	05OCT2016	12	Entered	67	Male	02NOV16	280	Placebo	>=250 mg/day	Yes	No	>=250 mg/day	No	Yes	Yes	Yes	Yes
Visit 1	2	HYPERTENSION	cardiovascular	Yes	Yes	12_032		2007				Yes		Yes	No	Yes		No			05OCT16	05OCT2016	12	Entered	67	Male	02NOV16	280	Placebo	>=250 mg/day	Yes	No	>=250 mg/day	No	Yes	Yes	Yes	Yes
Visit 1	3	DYSLIPIDEMIA	endocrine	Yes	Yes	12_032		2012				Yes		Yes	No	Yes		No			05OCT16	05OCT2016	12	Entered	67	Male	02NOV16	280	Placebo	>=250 mg/day	Yes	No	>=250 mg/day	No	Yes	Yes	Yes	Yes
Visit 1	4	OBESITY	endocrine	Yes	Yes	12_032		2005				Yes		Yes	No	Yes		No			05OCT16	05OCT2016	12	Entered	67	Male	02NOV16	280	Placebo	>=250 mg/day	Yes	No	>=250 mg/day	No	Yes	Yes	Yes	Yes
Visit 1	5	PERIPHERAL NEUROPATHY	neurological	Yes	Yes	12_032		2011				Yes		Yes	No	Yes		No			05OCT16	05OCT2016	12	Entered	67	Male	02NOV16	280	Placebo	>=250 mg/day	Yes	No	>=250 mg/day	No	Yes	Yes	Yes	Yes
Visit 1	6	UMBILICAL HERNIA	gastrointestinal	Yes	Yes	12_032		2013				Yes		Yes	No	Yes		No			05OCT16	05OCT2016	12	Entered	67	Male	02NOV16	280	Placebo	>=250 mg/day	Yes	No	>=250 mg/day	No	Yes	Yes	Yes	Yes
Visit 2	1	DIABETES MELLITUS TYPE II	endocrine	Yes	Yes	12_032		2007					No										12	Entered	67	Male	02NOV16	280	Placebo	>=250 mg/day	Yes	No	>=250 mg/day	No	Yes	Yes	Yes	Yes
Visit 2	2	HYPERTENSION	cardiovascular	Yes	Yes	12_032		2007					No										12	Entered	67	Male	02NOV16	280	Placebo	>=250 mg/day	Yes	No	>=250 mg/day	No	Yes	Yes	Yes	Yes
Visit 2	3	DYSLIPIDEMIA	endocrine	Yes	Yes	12_032		2012					No										12	Entered	67	Male	02NOV16	280	Placebo	>=250 mg/day	Yes	No	>=250 mg/day	No	Yes	Yes	Yes	Yes
Visit 2	4	OBESITY	endocrine	Yes	Yes	12_032		2005					No										12	Entered	67	Male	02NOV16	280	Placebo	>=250 mg/day	Yes	No	>=250 mg/day	No	Yes	Yes	Yes	Yes
Visit 2	5	PERIPHERAL NEUROPATHY	neurological	Yes	Yes	12_032		2011					No										12	Entered	67	Male	02NOV16	280	Placebo	>=250 mg/day	Yes	No	>=250 mg/day	No	Yes	Yes	Yes	Yes
Visit 2	6	UMBILICAL HERNIA	gastrointestinal	Yes	Yes	12_032		2013					No										12	Entered	67	Male	02NOV16	280	Placebo	>=250 mg/day	Yes	No	>=250 mg/day	No	Yes	Yes	Yes	Yes
Visit 1	1	DIABETES MELLITUS TYPE II	endocrine	Yes	Yes	12_033		OCT2013				Yes		Yes	No	Yes		No			10OCT16	10OCT2016	12	Entered	72	Female	02NOV16	282	MF4637	>=250 mg/day	Yes	No	>=250 mg/day	No	Yes	Yes	Yes	Yes
Visit 1	2	HYPERTENSION	cardiovascular	Yes	Yes	12_033		SEP2013				Yes		Yes	No	Yes		No			10OCT16	10OCT2016	12	Entered	72	Female	02NOV16	282	MF4637	>=250 mg/day	Yes	No	>=250 mg/day	No	Yes	Yes	Yes	Yes
Visit 1	3	POSTMENOPAUSAL	genital/urinary	Yes	Yes	12_033		1994				Yes		Yes	No	Yes		No			10OCT16	10OCT2016	12	Entered	72	Female	02NOV16	282	MF4637	>=250 mg/day	Yes	No	>=250 mg/day	No	Yes	Yes	Yes	Yes
Visit 1	4	OBESITY	endocrine	Yes	Yes	12_033		2007				Yes		Yes	No	Yes		No			10OCT16	10OCT2016	12	Entered	72	Female	02NOV16	282	MF4637	>=250 mg/day	Yes	No	>=250 mg/day	No	Yes	Yes	Yes	Yes
Visit 1	5	UNSPECIFIED HEMORRHOIDS	gastrointestinal	Yes	Yes	12_033	08MAR16	08MAR2016				Yes		Yes	No	Yes		No			10OCT16	10OCT2016	12	Entered	72	Female	02NOV16	282	MF4637	>=250 mg/day	Yes	No	>=250 mg/day	No	Yes	Yes	Yes	Yes
Visit 1	6	POLYP OF COLON	gastrointestinal	Yes	Yes	12_033	08MAR16	08MAR2016				Yes		Yes	No	Yes		No			10OCT16	10OCT2016	12	Entered	72	Female	02NOV16	282	MF4637	>=250 mg/day	Yes	No	>=250 mg/day	No	Yes	Yes	Yes	Yes
Visit 1	7	SMALL GRANULOMA HEALED/BENIGN IN LEFT LOWER LOBE (CHEST X-RAY FINDING))	dermatological	Yes	Yes	12_033	02OCT14	02OCT2014				Yes		Yes	No	Yes		No			10OCT16	10OCT2016	12	Entered	72	Female	02NOV16	282	MF4637	>=250 mg/day	Yes	No	>=250 mg/day	No	Yes	Yes	Yes	Yes
Visit 1	8	OSTEOPOROSIS VERTEBRAL SPINE	musculoskeletal	Yes	Yes	12_033	02OCT14	02OCT2014				Yes		Yes	No	Yes		No			10OCT16	10OCT2016	12	Entered	72	Female	02NOV16	282	MF4637	>=250 mg/day	Yes	No	>=250 mg/day	No	Yes	Yes	Yes	Yes
Visit 1	9	MILD ATHEROSCLEROSIS OF AORTA	cardiovascular	Yes	Yes	12_033	02OCT14	02OCT2014				Yes		Yes	No	Yes		No			10OCT16	10OCT2016	12	Entered	72	Female	02NOV16	282	MF4637	>=250 mg/day	Yes	No	>=250 mg/day	No	Yes	Yes	Yes	Yes
Visit 1	10	HERPES SIMPLEX ORAL	immunological	Yes	Yes	12_033		2014				Yes		Yes	No	Yes		No			10OCT16	10OCT2016	12	Entered	72	Female	02NOV16	282	MF4637	>=250 mg/day	Yes	No	>=250 mg/day	No	Yes	Yes	Yes	Yes
Visit 1	11	GASTROESOPHAGEAL REFLUX DISEASE	gastrointestinal	Yes	Yes	12_033		2010				Yes		Yes	No	Yes		No			10OCT16	10OCT2016	12	Entered	72	Female	02NOV16	282	MF4637	>=250 mg/day	Yes	No	>=250 mg/day	No	Yes	Yes	Yes	Yes
Visit 1	12	MINOR DEPRESSIVE DISORDER	psychological	Yes	Yes	12_033		2014				Yes		Yes	No	Yes		No			10OCT16	10OCT2016	12	Entered	72	Female	02NOV16	282	MF4637	>=250 mg/day	Yes	No	>=250 mg/day	No	Yes	Yes	Yes	Yes
Visit 1	13	HIP PAIN	musculoskeletal	Yes	Yes	12_033		2014				Yes		Yes	No	Yes		No			10OCT16	10OCT2016	12	Entered	72	Female	02NOV16	282	MF4637	>=250 mg/day	Yes	No	>=250 mg/day	No	Yes	Yes	Yes	Yes
Visit 1	14	ONYCHOMYCOSIS	dermatological	Yes	Yes	12_033		2015				Yes		Yes	No	Yes		No			10OCT16	10OCT2016	12	Entered	72	Female	02NOV16	282	MF4637	>=250 mg/day	Yes	No	>=250 mg/day	No	Yes	Yes	Yes	Yes
Visit 1	15	COLONOSCOPY	gastrointestinal	Yes		12_033	08MAR16	08MAR2016	08MAR16	08MAR2016		Yes		Yes	No	Yes		No			10OCT16	10OCT2016	12	Entered	72	Female	02NOV16	282	MF4637	>=250 mg/day	Yes	No	>=250 mg/day	No	Yes	Yes	Yes	Yes
Visit 1	16	GALLSTONES	gastrointestinal	Yes	Yes	12_033	10OCT16	10OCT2016				Yes		Yes	No	Yes		No			10OCT16	10OCT2016	12	Entered	72	Female	02NOV16	282	MF4637	>=250 mg/day	Yes	No	>=250 mg/day	No	Yes	Yes	Yes	Yes
Visit 1	17	GASTRITIS	gastrointestinal	Yes	Yes	12_033		2010				Yes		Yes	No	Yes		No			10OCT16	10OCT2016	12	Entered	72	Female	02NOV16	282	MF4637	>=250 mg/day	Yes	No	>=250 mg/day	No	Yes	Yes	Yes	Yes
Visit 1	18	BACK PAIN	musculoskeletal	Yes	Yes	12_033		2010				Yes		Yes	No	Yes		No			10OCT16	10OCT2016	12	Entered	72	Female	02NOV16	282	MF4637	>=250 mg/day	Yes	No	>=250 mg/day	No	Yes	Yes	Yes	Yes
Visit 1	19	KNEE PAIN	musculoskeletal	Yes	Yes	12_033		2010				Yes		Yes	No	Yes		No			10OCT16	10OCT2016	12	Entered	72	Female	02NOV16	282	MF4637	>=250 mg/day	Yes	No	>=250 mg/day	No	Yes	Yes	Yes	Yes
Visit 1	20	TORTICOLLIS	musculoskeletal	Yes	Yes	12_033		2014				Yes		Yes	No	Yes		No			10OCT16	10OCT2016	12	Entered	72	Female	02NOV16	282	MF4637	>=250 mg/day	Yes	No	>=250 mg/day	No	Yes	Yes	Yes	Yes
Visit 1	21	PAIN IN LOWER LIMBS	musculoskeletal	Yes	Yes	12_033		2014				Yes		Yes	No	Yes		No			10OCT16	10OCT2016	12	Entered	72	Female	02NOV16	282	MF4637	>=250 mg/day	Yes	No	>=250 mg/day	No	Yes	Yes	Yes	Yes
Visit 1	22	MEMORY IMPAIRMENT	neurological	Yes	Yes	12_033		2010				Yes		Yes	No	Yes		No			10OCT16	10OCT2016	12	Entered	72	Female	02NOV16	282	MF4637	>=250 mg/day	Yes	No	>=250 mg/day	No	Yes	Yes	Yes	Yes
Visit 1	23	ADENOIDECTOMY	surgeries	Yes		12_033		1968		1968		Yes		Yes	No	Yes		No			10OCT16	10OCT2016	12	Entered	72	Female	02NOV16	282	MF4637	>=250 mg/day	Yes	No	>=250 mg/day	No	Yes	Yes	Yes	Yes
Visit 2	1	DIABETES MELLITUS TYPE II	endocrine	Yes	Yes	12_033		10UNK2013					No										12	Entered	72	Female	02NOV16	282	MF4637	>=250 mg/day	Yes	No	>=250 mg/day	No	Yes	Yes	Yes	Yes
Visit 2	2	HYPERTENSION	cardiovascular	Yes	Yes	12_033		09UNK2013					No										12	Entered	72	Female	02NOV16	282	MF4637	>=250 mg/day	Yes	No	>=250 mg/day	No	Yes	Yes	Yes	Yes
Visit 2	3	POSTMENOPAUSAL	genital/urinary	Yes	Yes	12_033		1994					No										12	Entered	72	Female	02NOV16	282	MF4637	>=250 mg/day	Yes	No	>=250 mg/day	No	Yes	Yes	Yes	Yes
Visit 2	4	OBESITY	endocrine	Yes	Yes	12_033		2007					No										12	Entered	72	Female	02NOV16	282	MF4637	>=250 mg/day	Yes	No	>=250 mg/day	No	Yes	Yes	Yes	Yes
Visit 2	5	UNSPECIFIED HEMORRHOIDS	gastrointestinal	Yes	Yes	12_033	08MAR16	08MAR2016					No										12	Entered	72	Female	02NOV16	282	MF4637	>=250 mg/day	Yes	No	>=250 mg/day	No	Yes	Yes	Yes	Yes
Visit 2	6	POLYP OF COLON	gastrointestinal	Yes	Yes	12_033	08MAR16	08MAR2016					No										12	Entered	72	Female	02NOV16	282	MF4637	>=250 mg/day	Yes	No	>=250 mg/day	No	Yes	Yes	Yes	Yes
Visit 2	7	SMALL GRANULOMA HEALED/BENIGN IN LEFT LOWER LOBE (CHEST X-RAY FINDING))	dermatological	Yes	Yes	12_033	02OCT14	02OCT2014					No										12	Entered	72	Female	02NOV16	282	MF4637	>=250 mg/day	Yes	No	>=250 mg/day	No	Yes	Yes	Yes	Yes
Visit 2	8	OSTEOPOROSIS VERTEBRAL SPINE	musculoskeletal	Yes	Yes	12_033	02OCT14	02OCT2014					No										12	Entered	72	Female	02NOV16	282	MF4637	>=250 mg/day	Yes	No	>=250 mg/day	No	Yes	Yes	Yes	Yes
Visit 2	9	MILD ATHEROSCLEROSIS OF AORTA	cardiovascular	Yes	Yes	12_033	02OCT14	02OCT2014					No										12	Entered	72	Female	02NOV16	282	MF4637	>=250 mg/day	Yes	No	>=250 mg/day	No	Yes	Yes	Yes	Yes
Visit 2	10	HERPES SIMPLEX ORAL	immunological	Yes	Yes	12_033		2014					No										12	Entered	72	Female	02NOV16	282	MF4637	>=250 mg/day	Yes	No	>=250 mg/day	No	Yes	Yes	Yes	Yes
Visit 2	11	GASTROESOPHAGEAL REFLUX DISEASE	gastrointestinal	Yes	Yes	12_033		2010					No										12	Entered	72	Female	02NOV16	282	MF4637	>=250 mg/day	Yes	No	>=250 mg/day	No	Yes	Yes	Yes	Yes
Visit 2	12	MINOR DEPRESSIVE DISORDER	psychological	Yes	Yes	12_033		2014					No										12	Entered	72	Female	02NOV16	282	MF4637	>=250 mg/day	Yes	No	>=250 mg/day	No	Yes	Yes	Yes	Yes
Visit 2	13	HIP PAIN	musculoskeletal	Yes	Yes	12_033		2014					No										12	Entered	72	Female	02NOV16	282	MF4637	>=250 mg/day	Yes	No	>=250 mg/day	No	Yes	Yes	Yes	Yes
Visit 2	14	ONYCHOMYCOSIS	dermatological	Yes	Yes	12_033		2015					No										12	Entered	72	Female	02NOV16	282	MF4637	>=250 mg/day	Yes	No	>=250 mg/day	No	Yes	Yes	Yes	Yes
Visit 2	15	COLONOSCOPY	gastrointestinal	Yes		12_033	08MAR16	08MAR2016	08MAR16	08MAR2016			No										12	Entered	72	Female	02NOV16	282	MF4637	>=250 mg/day	Yes	No	>=250 mg/day	No	Yes	Yes	Yes	Yes
Visit 2	16	GALLSTONES	gastrointestinal	Yes	Yes	12_033	10OCT16	10OCT2016					No										12	Entered	72	Female	02NOV16	282	MF4637	>=250 mg/day	Yes	No	>=250 mg/day	No	Yes	Yes	Yes	Yes
Visit 2	17	GASTRITIS	gastrointestinal	Yes	Yes	12_033		2010					No										12	Entered	72	Female	02NOV16	282	MF4637	>=250 mg/day	Yes	No	>=250 mg/day	No	Yes	Yes	Yes	Yes
Visit 2	18	BACK PAIN	musculoskeletal	Yes	Yes	12_033		2010					No										12	Entered	72	Female	02NOV16	282	MF4637	>=250 mg/day	Yes	No	>=250 mg/day	No	Yes	Yes	Yes	Yes
Visit 2	19	KNEE PAIN	musculoskeletal	Yes	Yes	12_033		2010					No										12	Entered	72	Female	02NOV16	282	MF4637	>=250 mg/day	Yes	No	>=250 mg/day	No	Yes	Yes	Yes	Yes
Visit 2	20	TORTICOLLIS	musculoskeletal	Yes	Yes	12_033		2014					No										12	Entered	72	Female	02NOV16	282	MF4637	>=250 mg/day	Yes	No	>=250 mg/day	No	Yes	Yes	Yes	Yes
Visit 2	21	PAIN IN LOWER LIMBS	musculoskeletal	Yes	Yes	12_033		2014					No										12	Entered	72	Female	02NOV16	282	MF4637	>=250 mg/day	Yes	No	>=250 mg/day	No	Yes	Yes	Yes	Yes
Visit 2	22	MEMORY IMPAIRMENT	neurological	Yes	Yes	12_033		2010					No										12	Entered	72	Female	02NOV16	282	MF4637	>=250 mg/day	Yes	No	>=250 mg/day	No	Yes	Yes	Yes	Yes
Visit 2	23	ADENOIDECTOMY	surgeries	Yes		12_033		1968		1968			No										12	Entered	72	Female	02NOV16	282	MF4637	>=250 mg/day	Yes	No	>=250 mg/day	No	Yes	Yes	Yes	Yes
Visit 1	1	DIABETES MELLITUS TYPE II	endocrine	Yes	Yes	12_034		2001				Yes		Yes	No	Yes		No			10OCT16	10OCT2016	12	Entered	55	Female	26OCT16	261	Placebo	>=250 mg/day	Yes	No	>=250 mg/day	No	Yes	Yes	Yes	No
Visit 1	2	HYPERTENSION	cardiovascular	Yes	Yes	12_034		1992				Yes		Yes	No	Yes		No			10OCT16	10OCT2016	12	Entered	55	Female	26OCT16	261	Placebo	>=250 mg/day	Yes	No	>=250 mg/day	No	Yes	Yes	Yes	No
Visit 1	3	DYSLIPIDEMIA	endocrine	Yes	Yes	12_034		2015				Yes		Yes	No	Yes		No			10OCT16	10OCT2016	12	Entered	55	Female	26OCT16	261	Placebo	>=250 mg/day	Yes	No	>=250 mg/day	No	Yes	Yes	Yes	No
Visit 1	4	ALLERGIC RHINITIS	allergies	Yes	Yes	12_034		2015				Yes		Yes	No	Yes		No			10OCT16	10OCT2016	12	Entered	55	Female	26OCT16	261	Placebo	>=250 mg/day	Yes	No	>=250 mg/day	No	Yes	Yes	Yes	No
Visit 1	5	OSTEOARTHRITIS	musculoskeletal	Yes	Yes	12_034		2005				Yes		Yes	No	Yes		No			10OCT16	10OCT2016	12	Entered	55	Female	26OCT16	261	Placebo	>=250 mg/day	Yes	No	>=250 mg/day	No	Yes	Yes	Yes	No
Visit 1	6	CHOLECYSTITIS	gastrointestinal	Yes		12_034		MAR2016		MAR2016		Yes		Yes	No	Yes		No			10OCT16	10OCT2016	12	Entered	55	Female	26OCT16	261	Placebo	>=250 mg/day	Yes	No	>=250 mg/day	No	Yes	Yes	Yes	No
Visit 1	7	CHOLECYSTECTOMY	surgeries	Yes		12_034		MAR2016		MAR2016		Yes		Yes	No	Yes		No			10OCT16	10OCT2016	12	Entered	55	Female	26OCT16	261	Placebo	>=250 mg/day	Yes	No	>=250 mg/day	No	Yes	Yes	Yes	No
Visit 1	8	UMBILICAL HERNIA	gastrointestinal	Yes	Yes	12_034		1991				Yes		Yes	No	Yes		No			10OCT16	10OCT2016	12	Entered	55	Female	26OCT16	261	Placebo	>=250 mg/day	Yes	No	>=250 mg/day	No	Yes	Yes	Yes	No
Visit 1	9	OBESITY	endocrine	Yes	Yes	12_034		2001				Yes		Yes	No	Yes		No			10OCT16	10OCT2016	12	Entered	55	Female	26OCT16	261	Placebo	>=250 mg/day	Yes	No	>=250 mg/day	No	Yes	Yes	Yes	No
Visit 1	10	POSTMENOPAUSAL	genital/urinary	Yes	Yes	12_034		2008				Yes		Yes	No	Yes		No			10OCT16	10OCT2016	12	Entered	55	Female	26OCT16	261	Placebo	>=250 mg/day	Yes	No	>=250 mg/day	No	Yes	Yes	Yes	No
Visit 1	11	TRAFFIC ACCIDENT	musculoskeletal	Yes	Yes	12_034		1986				Yes		Yes	No	Yes		No			10OCT16	10OCT2016	12	Entered	55	Female	26OCT16	261	Placebo	>=250 mg/day	Yes	No	>=250 mg/day	No	Yes	Yes	Yes	No
Visit 1	12	FEMUR FRACTURE	musculoskeletal	Yes		12_034		1986		1986		Yes		Yes	No	Yes		No			10OCT16	10OCT2016	12	Entered	55	Female	26OCT16	261	Placebo	>=250 mg/day	Yes	No	>=250 mg/day	No	Yes	Yes	Yes	No
Visit 1	13	FEMUR FRACTURE REDUCTION	surgeries	Yes		12_034		1986		1986		Yes		Yes	No	Yes		No			10OCT16	10OCT2016	12	Entered	55	Female	26OCT16	261	Placebo	>=250 mg/day	Yes	No	>=250 mg/day	No	Yes	Yes	Yes	No
Visit 1	14	LEFT FOREARM FRACTURE	musculoskeletal	Yes		12_034		1986		1986		Yes		Yes	No	Yes		No			10OCT16	10OCT2016	12	Entered	55	Female	26OCT16	261	Placebo	>=250 mg/day	Yes	No	>=250 mg/day	No	Yes	Yes	Yes	No
Visit 1	15	LEFT FOREARM FRACTURE REDUCTION	surgeries	Yes		12_034		1986		1986		Yes		Yes	No	Yes		No			10OCT16	10OCT2016	12	Entered	55	Female	26OCT16	261	Placebo	>=250 mg/day	Yes	No	>=250 mg/day	No	Yes	Yes	Yes	No
Visit 1	16	RIGHT ELBOW FRACTURE	musculoskeletal	Yes		12_034		1986		1986		Yes		Yes	No	Yes		No			10OCT16	10OCT2016	12	Entered	55	Female	26OCT16	261	Placebo	>=250 mg/day	Yes	No	>=250 mg/day	No	Yes	Yes	Yes	No
Visit 1	17	RIGHT ELBOW FRACTURE REDUCTION	musculoskeletal	Yes		12_034		1986		1986		Yes		Yes	No	Yes		No			10OCT16	10OCT2016	12	Entered	55	Female	26OCT16	261	Placebo	>=250 mg/day	Yes	No	>=250 mg/day	No	Yes	Yes	Yes	No
Visit 2	1	DIABETES MELLITUS TYPE II	endocrine	Yes	Yes	12_034		2001					No										12	Entered	55	Female	26OCT16	261	Placebo	>=250 mg/day	Yes	No	>=250 mg/day	No	Yes	Yes	Yes	No
Visit 2	2	HYPERTENSION	cardiovascular	Yes	Yes	12_034		1992					No										12	Entered	55	Female	26OCT16	261	Placebo	>=250 mg/day	Yes	No	>=250 mg/day	No	Yes	Yes	Yes	No
Visit 2	3	DYSLIPIDEMIA	endocrine	Yes	Yes	12_034		2015					No										12	Entered	55	Female	26OCT16	261	Placebo	>=250 mg/day	Yes	No	>=250 mg/day	No	Yes	Yes	Yes	No
Visit 2	4	ALLERGIC RHINITIS	allergies	Yes	Yes	12_034		2015					No										12	Entered	55	Female	26OCT16	261	Placebo	>=250 mg/day	Yes	No	>=250 mg/day	No	Yes	Yes	Yes	No
Visit 2	5	OSTEOARTHRITIS	musculoskeletal	Yes	Yes	12_034		2005					No										12	Entered	55	Female	26OCT16	261	Placebo	>=250 mg/day	Yes	No	>=250 mg/day	No	Yes	Yes	Yes	No
Visit 2	6	CHOLECYSTITIS	gastrointestinal	Yes		12_034		03UNK2016		03UNK2016			No										12	Entered	55	Female	26OCT16	261	Placebo	>=250 mg/day	Yes	No	>=250 mg/day	No	Yes	Yes	Yes	No
Visit 2	7	CHOLECYSTECTOMY	surgeries	Yes		12_034		03UNK2016		03UNK2016			No										12	Entered	55	Female	26OCT16	261	Placebo	>=250 mg/day	Yes	No	>=250 mg/day	No	Yes	Yes	Yes	No
Visit 2	8	UMBILICAL HERNIA	gastrointestinal	Yes	Yes	12_034		1991					No										12	Entered	55	Female	26OCT16	261	Placebo	>=250 mg/day	Yes	No	>=250 mg/day	No	Yes	Yes	Yes	No
Visit 2	9	OBESITY	endocrine	Yes	Yes	12_034		2001					No										12	Entered	55	Female	26OCT16	261	Placebo	>=250 mg/day	Yes	No	>=250 mg/day	No	Yes	Yes	Yes	No
Visit 2	10	POSTMENOPAUSAL	genital/urinary	Yes	Yes	12_034		2008					No										12	Entered	55	Female	26OCT16	261	Placebo	>=250 mg/day	Yes	No	>=250 mg/day	No	Yes	Yes	Yes	No
Visit 2	11	TRAFFIC ACCIDENT	musculoskeletal	Yes	Yes	12_034		1986					No										12	Entered	55	Female	26OCT16	261	Placebo	>=250 mg/day	Yes	No	>=250 mg/day	No	Yes	Yes	Yes	No
Visit 2	12	FEMUR FRACTURE	musculoskeletal	Yes		12_034		1986		1986			No										12	Entered	55	Female	26OCT16	261	Placebo	>=250 mg/day	Yes	No	>=250 mg/day	No	Yes	Yes	Yes	No
Visit 2	13	FEMUR FRACTURE REDUCTION	surgeries	Yes		12_034		1986		1986			No										12	Entered	55	Female	26OCT16	261	Placebo	>=250 mg/day	Yes	No	>=250 mg/day	No	Yes	Yes	Yes	No
Visit 2	14	LEFT FOREARM FRACTURE	musculoskeletal	Yes		12_034		1986		1986			No										12	Entered	55	Female	26OCT16	261	Placebo	>=250 mg/day	Yes	No	>=250 mg/day	No	Yes	Yes	Yes	No
Visit 2	15	LEFT FOREARM FRACTURE REDUCTION	surgeries	Yes		12_034		1986		1986			No										12	Entered	55	Female	26OCT16	261	Placebo	>=250 mg/day	Yes	No	>=250 mg/day	No	Yes	Yes	Yes	No
Visit 2	16	RIGHT ELBOW FRACTURE	musculoskeletal	Yes		12_034		1986		1986			No										12	Entered	55	Female	26OCT16	261	Placebo	>=250 mg/day	Yes	No	>=250 mg/day	No	Yes	Yes	Yes	No
Visit 2	17	RIGHT ELBOW FRACTURE REDUCTION	musculoskeletal	Yes		12_034		1986		1986			No										12	Entered	55	Female	26OCT16	261	Placebo	>=250 mg/day	Yes	No	>=250 mg/day	No	Yes	Yes	Yes	No
Visit 1	1	DIABETES MELLITUS TYPE II	endocrine	Yes	Yes	12_038		07UNK2001				Yes		Yes	No	Yes		No			12OCT16	12OCT2016	12	Entered	62	Male	26OCT16	263	Placebo	>=250 mg/day	Yes	Yes	>=250 mg/day	No	Yes	Yes	Yes	Yes
Visit 1	2	DEPRESSIVE DISORDER	psychological	Yes	Yes	12_038		07UNK2001				Yes		Yes	No	Yes		No			12OCT16	12OCT2016	12	Entered	62	Male	26OCT16	263	Placebo	>=250 mg/day	Yes	Yes	>=250 mg/day	No	Yes	Yes	Yes	Yes
Visit 1	3	HYPERTENSION	cardiovascular	Yes	Yes	12_038		1975				Yes		Yes	No	Yes		No			12OCT16	12OCT2016	12	Entered	62	Male	26OCT16	263	Placebo	>=250 mg/day	Yes	Yes	>=250 mg/day	No	Yes	Yes	Yes	Yes
Visit 1	4	HEMORRHAGIC STROKE	neurological	Yes		12_038		02UNK2002		02UNK2002		Yes		Yes	No	Yes		No			12OCT16	12OCT2016	12	Entered	62	Male	26OCT16	263	Placebo	>=250 mg/day	Yes	Yes	>=250 mg/day	No	Yes	Yes	Yes	Yes
Visit 1	5	CHRONIC LOW BACK PAIN	musculoskeletal	Yes	Yes	12_038		1970				Yes		Yes	No	Yes		No			12OCT16	12OCT2016	12	Entered	62	Male	26OCT16	263	Placebo	>=250 mg/day	Yes	Yes	>=250 mg/day	No	Yes	Yes	Yes	Yes
Visit 1	6	DYSLIPIDEMIA	endocrine	Yes	Yes	12_038		2000				Yes		Yes	No	Yes		No			12OCT16	12OCT2016	12	Entered	62	Male	26OCT16	263	Placebo	>=250 mg/day	Yes	Yes	>=250 mg/day	No	Yes	Yes	Yes	Yes
Visit 1	7	BENIGN NODULE RIGHT ADRENAL GLAND	immunological	Yes	Yes	12_038	01AUG13	01AUG2013				Yes		Yes	No	Yes		No			12OCT16	12OCT2016	12	Entered	62	Male	26OCT16	263	Placebo	>=250 mg/day	Yes	Yes	>=250 mg/day	No	Yes	Yes	Yes	Yes
Visit 1	8	SMALL CYST BENIGN IN SEGMENT #4 ANTERIOR LIVER	liver	Yes	Yes	12_038	01AUG13	01AUG2013				Yes		Yes	No	Yes		No			12OCT16	12OCT2016	12	Entered	62	Male	26OCT16	263	Placebo	>=250 mg/day	Yes	Yes	>=250 mg/day	No	Yes	Yes	Yes	Yes
Visit 1	9	OBESITY	endocrine	Yes	Yes	12_038		2000				Yes		Yes	No	Yes		No			12OCT16	12OCT2016	12	Entered	62	Male	26OCT16	263	Placebo	>=250 mg/day	Yes	Yes	>=250 mg/day	No	Yes	Yes	Yes	Yes
Visit 1	10	GASTROESOPHAGEAL REFLUX DISEASE	gastrointestinal	Yes	Yes	12_038		09UNK2013				Yes		Yes	No	Yes		No			12OCT16	12OCT2016	12	Entered	62	Male	26OCT16	263	Placebo	>=250 mg/day	Yes	Yes	>=250 mg/day	No	Yes	Yes	Yes	Yes
Visit 1	11	BILATERAL GLAUCOMA	eyes, ears, nose, throat	Yes	Yes	12_038		2012				Yes		Yes	No	Yes		No			12OCT16	12OCT2016	12	Entered	62	Male	26OCT16	263	Placebo	>=250 mg/day	Yes	Yes	>=250 mg/day	No	Yes	Yes	Yes	Yes
Visit 1	12	CATARACT LEFT EYE	surgeries	Yes		12_038		2015	24JUL15	24JUL2015		Yes		Yes	No	Yes		No			12OCT16	12OCT2016	12	Entered	62	Male	26OCT16	263	Placebo	>=250 mg/day	Yes	Yes	>=250 mg/day	No	Yes	Yes	Yes	Yes
Visit 1	13	INSOMNIA	psychological	Yes	Yes	12_038		2000				Yes		Yes	No	Yes		No			12OCT16	12OCT2016	12	Entered	62	Male	26OCT16	263	Placebo	>=250 mg/day	Yes	Yes	>=250 mg/day	No	Yes	Yes	Yes	Yes
Visit 1	14	HEMORRHOIDS UNSPECIFIED	gastrointestinal	Yes		12_038		1975		1978		Yes		Yes	No	Yes		No			12OCT16	12OCT2016	12	Entered	62	Male	26OCT16	263	Placebo	>=250 mg/day	Yes	Yes	>=250 mg/day	No	Yes	Yes	Yes	Yes
Visit 1	15	HEMORRHOIDS REPAIR SURGERY	surgeries	Yes		12_038		1978		1978		Yes		Yes	No	Yes		No			12OCT16	12OCT2016	12	Entered	62	Male	26OCT16	263	Placebo	>=250 mg/day	Yes	Yes	>=250 mg/day	No	Yes	Yes	Yes	Yes
Visit 1	16	CHOLECYSTITIS	gastrointestinal	Yes		12_038	12OCT16	12OCT2016	13OCT16	13OCT2016		Yes		Yes	No	Yes		No			12OCT16	12OCT2016	12	Entered	62	Male	26OCT16	263	Placebo	>=250 mg/day	Yes	Yes	>=250 mg/day	No	Yes	Yes	Yes	Yes
Visit 1	17	CHOLECYSTECTOMY	gastrointestinal	Yes		12_038	13OCT16	13OCT2016	13OCT16	13OCT2016		Yes		Yes	No	Yes		No			12OCT16	12OCT2016	12	Entered	62	Male	26OCT16	263	Placebo	>=250 mg/day	Yes	Yes	>=250 mg/day	No	Yes	Yes	Yes	Yes
Visit 1	18	DIABETIC NEUROPATHY	neurological	Yes	Yes	12_038		2011				Yes		Yes	No	Yes		No			12OCT16	12OCT2016	12	Entered	62	Male	26OCT16	263	Placebo	>=250 mg/day	Yes	Yes	>=250 mg/day	No	Yes	Yes	Yes	Yes
Visit 2	1	DIABETES MELLITUS TYPE II	endocrine	Yes	Yes	12_038		07UNK2001					No										12	Entered	62	Male	26OCT16	263	Placebo	>=250 mg/day	Yes	Yes	>=250 mg/day	No	Yes	Yes	Yes	Yes
Visit 2	2	DEPRESSIVE DISORDER	psychological	Yes	Yes	12_038		07UNK2001					No										12	Entered	62	Male	26OCT16	263	Placebo	>=250 mg/day	Yes	Yes	>=250 mg/day	No	Yes	Yes	Yes	Yes
Visit 2	3	HYPERTENSION	cardiovascular	Yes	Yes	12_038		1975					No										12	Entered	62	Male	26OCT16	263	Placebo	>=250 mg/day	Yes	Yes	>=250 mg/day	No	Yes	Yes	Yes	Yes
Visit 2	4	HEMORRHAGIC STROKE	neurological	Yes		12_038		02UNK2002		02UNK2002			No										12	Entered	62	Male	26OCT16	263	Placebo	>=250 mg/day	Yes	Yes	>=250 mg/day	No	Yes	Yes	Yes	Yes
Visit 2	5	CHRONIC LOW BACK PAIN	musculoskeletal	Yes	Yes	12_038		1970					No										12	Entered	62	Male	26OCT16	263	Placebo	>=250 mg/day	Yes	Yes	>=250 mg/day	No	Yes	Yes	Yes	Yes
Visit 2	6	DYSLIPIDEMIA	endocrine	Yes	Yes	12_038		2000					No										12	Entered	62	Male	26OCT16	263	Placebo	>=250 mg/day	Yes	Yes	>=250 mg/day	No	Yes	Yes	Yes	Yes
Visit 2	7	BENIGN NODULE RIGHT ADRENAL GLAND	immunological	Yes	Yes	12_038	01AUG13	01AUG2013					No										12	Entered	62	Male	26OCT16	263	Placebo	>=250 mg/day	Yes	Yes	>=250 mg/day	No	Yes	Yes	Yes	Yes
Visit 2	8	SMALL CYST BENIGN IN SEGMENT #4 ANTERIOR LIVER	liver	Yes	Yes	12_038	01AUG13	01AUG2013					No										12	Entered	62	Male	26OCT16	263	Placebo	>=250 mg/day	Yes	Yes	>=250 mg/day	No	Yes	Yes	Yes	Yes
Visit 2	9	OBESITY	endocrine	Yes	Yes	12_038		2000					No										12	Entered	62	Male	26OCT16	263	Placebo	>=250 mg/day	Yes	Yes	>=250 mg/day	No	Yes	Yes	Yes	Yes
Visit 2	10	GASTROESOPHAGEAL REFLUX DISEASE	gastrointestinal	Yes	Yes	12_038		09UNK2013					No										12	Entered	62	Male	26OCT16	263	Placebo	>=250 mg/day	Yes	Yes	>=250 mg/day	No	Yes	Yes	Yes	Yes
Visit 2	11	BILATERAL GLAUCOMA	eyes, ears, nose, throat	Yes	Yes	12_038		2012					No										12	Entered	62	Male	26OCT16	263	Placebo	>=250 mg/day	Yes	Yes	>=250 mg/day	No	Yes	Yes	Yes	Yes
Visit 2	12	CATARACT LEFT EYE	surgeries	Yes		12_038		2015	24JUL15	24JUL2015			No										12	Entered	62	Male	26OCT16	263	Placebo	>=250 mg/day	Yes	Yes	>=250 mg/day	No	Yes	Yes	Yes	Yes
Visit 2	13	INSOMNIA	psychological	Yes	Yes	12_038		2000					No										12	Entered	62	Male	26OCT16	263	Placebo	>=250 mg/day	Yes	Yes	>=250 mg/day	No	Yes	Yes	Yes	Yes
Visit 2	14	HEMORRHOIDS UNSPECIFIED	gastrointestinal	Yes		12_038		1975		1978			No										12	Entered	62	Male	26OCT16	263	Placebo	>=250 mg/day	Yes	Yes	>=250 mg/day	No	Yes	Yes	Yes	Yes
Visit 2	15	HEMORRHOIDS REPAIR SURGERY	surgeries	Yes		12_038		1978		1978			No										12	Entered	62	Male	26OCT16	263	Placebo	>=250 mg/day	Yes	Yes	>=250 mg/day	No	Yes	Yes	Yes	Yes
Visit 2	16	CHOLECYSTITIS	gastrointestinal	Yes		12_038	12OCT16	12OCT2016	13OCT16	13OCT2016			No										12	Entered	62	Male	26OCT16	263	Placebo	>=250 mg/day	Yes	Yes	>=250 mg/day	No	Yes	Yes	Yes	Yes
Visit 2	17	CHOLECYSTECTOMY	gastrointestinal	Yes		12_038	13OCT16	13OCT2016	13OCT16	13OCT2016			No										12	Entered	62	Male	26OCT16	263	Placebo	>=250 mg/day	Yes	Yes	>=250 mg/day	No	Yes	Yes	Yes	Yes
Visit 2	18	DIABETIC NEUROPATHY	neurological	Yes	Yes	12_038		2011					No										12	Entered	62	Male	26OCT16	263	Placebo	>=250 mg/day	Yes	Yes	>=250 mg/day	No	Yes	Yes	Yes	Yes
Visit 1	1	BILATERAL VARICOCELE	genital/urinary	Yes		12_039		1978		1978		No		Yes	Yes		Ultrasound	No	30SEP16	30SEP2016			12	Entered	57	Male	26OCT16	262	MF4637	<250 mg/day	No	No	<250 mg/day	No	Yes	Yes	Yes	Yes
Visit 1	2	VARICOCELE SURGERY	surgeries	Yes		12_039		1978		1978		No		Yes	Yes		Ultrasound	No	30SEP16	30SEP2016			12	Entered	57	Male	26OCT16	262	MF4637	<250 mg/day	No	No	<250 mg/day	No	Yes	Yes	Yes	Yes
Visit 1	3	ROTATOR CUFF INJURY RIGHT SHOULDER	musculoskeletal	Yes	Yes	12_039		07UNK2016				No		Yes	Yes		Ultrasound	No	30SEP16	30SEP2016			12	Entered	57	Male	26OCT16	262	MF4637	<250 mg/day	No	No	<250 mg/day	No	Yes	Yes	Yes	Yes
Visit 1	4	SLEEP APNEA	eyes, ears, nose, throat	Yes	Yes	12_039		12UNK2015				No		Yes	Yes		Ultrasound	No	30SEP16	30SEP2016			12	Entered	57	Male	26OCT16	262	MF4637	<250 mg/day	No	No	<250 mg/day	No	Yes	Yes	Yes	Yes
Visit 1	5	BENIGN RIGHT LUNG NODULE	eyes, ears, nose, throat	Yes	Yes	12_039		02UNK2016				No		Yes	Yes		Ultrasound	No	30SEP16	30SEP2016			12	Entered	57	Male	26OCT16	262	MF4637	<250 mg/day	No	No	<250 mg/day	No	Yes	Yes	Yes	Yes
Visit 1	6	DYSLIPIDEMIA	endocrine	Yes	Yes	12_039		1998				No		Yes	Yes		Ultrasound	No	30SEP16	30SEP2016			12	Entered	57	Male	26OCT16	262	MF4637	<250 mg/day	No	No	<250 mg/day	No	Yes	Yes	Yes	Yes
Visit 1	7	INSOMNIA	psychological	Yes	Yes	12_039		2000				No		Yes	Yes		Ultrasound	No	30SEP16	30SEP2016			12	Entered	57	Male	26OCT16	262	MF4637	<250 mg/day	No	No	<250 mg/day	No	Yes	Yes	Yes	Yes
Visit 1	8	ANXIETY	psychological	Yes	Yes	12_039		2014				No		Yes	Yes		Ultrasound	No	30SEP16	30SEP2016			12	Entered	57	Male	26OCT16	262	MF4637	<250 mg/day	No	No	<250 mg/day	No	Yes	Yes	Yes	Yes
Visit 1	9	CHRONIC BACK PAIN	musculoskeletal	Yes	Yes	12_039		2000				No		Yes	Yes		Ultrasound	No	30SEP16	30SEP2016			12	Entered	57	Male	26OCT16	262	MF4637	<250 mg/day	No	No	<250 mg/day	No	Yes	Yes	Yes	Yes
Visit 1	10	DEPRESSION	psychological	Yes	Yes	12_039		2014				No		Yes	Yes		Ultrasound	No	30SEP16	30SEP2016			12	Entered	57	Male	26OCT16	262	MF4637	<250 mg/day	No	No	<250 mg/day	No	Yes	Yes	Yes	Yes
Visit 1	11	RIGHT SHOULDER PAIN	musculoskeletal	Yes	Yes	12_039		07UNK2016				No		Yes	Yes		Ultrasound	No	30SEP16	30SEP2016			12	Entered	57	Male	26OCT16	262	MF4637	<250 mg/day	No	No	<250 mg/day	No	Yes	Yes	Yes	Yes
Visit 1	12	LEFT BACK LIPOMA	dermatological	Yes		12_039		2015		2015		No		Yes	Yes		Ultrasound	No	30SEP16	30SEP2016			12	Entered	57	Male	26OCT16	262	MF4637	<250 mg/day	No	No	<250 mg/day	No	Yes	Yes	Yes	Yes
Visit 1	13	LEFT BACK LIPOMA SURGERY	surgeries	Yes		12_039		2015		2015		No		Yes	Yes		Ultrasound	No	30SEP16	30SEP2016			12	Entered	57	Male	26OCT16	262	MF4637	<250 mg/day	No	No	<250 mg/day	No	Yes	Yes	Yes	Yes
Visit 1	14	FATTY LIVER	liver	Yes	Yes	12_039	30SEP16	30SEP2016				No		Yes	Yes		Ultrasound	No	30SEP16	30SEP2016			12	Entered	57	Male	26OCT16	262	MF4637	<250 mg/day	No	No	<250 mg/day	No	Yes	Yes	Yes	Yes
Visit 2	1	BILATERAL VARICOCELE	genital/urinary	Yes		12_039		1978		1978			No										12	Entered	57	Male	26OCT16	262	MF4637	<250 mg/day	No	No	<250 mg/day	No	Yes	Yes	Yes	Yes
Visit 2	2	VARICOCELE SURGERY	surgeries	Yes		12_039		1978		1978			No										12	Entered	57	Male	26OCT16	262	MF4637	<250 mg/day	No	No	<250 mg/day	No	Yes	Yes	Yes	Yes
Visit 2	3	ROTATOR CUFF INJURY RIGHT SHOULDER	musculoskeletal	Yes	Yes	12_039		07UNK2016					No										12	Entered	57	Male	26OCT16	262	MF4637	<250 mg/day	No	No	<250 mg/day	No	Yes	Yes	Yes	Yes
Visit 2	4	SLEEP APNEA	eyes, ears, nose, throat	Yes	Yes	12_039		12UNK2015					No										12	Entered	57	Male	26OCT16	262	MF4637	<250 mg/day	No	No	<250 mg/day	No	Yes	Yes	Yes	Yes
Visit 2	5	BENIGN RIGHT LUNG NODULE	eyes, ears, nose, throat	Yes	Yes	12_039		02UNK2016					No										12	Entered	57	Male	26OCT16	262	MF4637	<250 mg/day	No	No	<250 mg/day	No	Yes	Yes	Yes	Yes
Visit 2	6	HYPERCHOLESTEROLEMIA	endocrine	Yes	Yes	12_039		1998					No										12	Entered	57	Male	26OCT16	262	MF4637	<250 mg/day	No	No	<250 mg/day	No	Yes	Yes	Yes	Yes
Visit 2	7	INSOMNIA	psychological	Yes	Yes	12_039		2000					No										12	Entered	57	Male	26OCT16	262	MF4637	<250 mg/day	No	No	<250 mg/day	No	Yes	Yes	Yes	Yes
Visit 2	8	ANXIETY	psychological	Yes	Yes	12_039		2014					No										12	Entered	57	Male	26OCT16	262	MF4637	<250 mg/day	No	No	<250 mg/day	No	Yes	Yes	Yes	Yes
Visit 2	9	CHRONIC BACK PAIN	musculoskeletal	Yes	Yes	12_039		2000					No										12	Entered	57	Male	26OCT16	262	MF4637	<250 mg/day	No	No	<250 mg/day	No	Yes	Yes	Yes	Yes
Visit 2	10	DEPRESSION	psychological	Yes	Yes	12_039		2014					No										12	Entered	57	Male	26OCT16	262	MF4637	<250 mg/day	No	No	<250 mg/day	No	Yes	Yes	Yes	Yes
Visit 2	11	RIGHT SHOULDER PAIN	musculoskeletal	Yes	Yes	12_039		07UNK2016					No										12	Entered	57	Male	26OCT16	262	MF4637	<250 mg/day	No	No	<250 mg/day	No	Yes	Yes	Yes	Yes
Visit 1	1	DIABETES MELLITUS TYPE II	endocrine	Yes	Yes	12_040		2008				Yes		Yes	No	Yes		No			12OCT16	12OCT2016	12	Entered	60	Female	10NOV16	292	MF4637	>=250 mg/day	Yes	Yes	>=250 mg/day	No	Yes	Yes	Yes	Yes
Visit 1	2	HYPERTENSION	cardiovascular	Yes	Yes	12_040		2009				Yes		Yes	No	Yes		No			12OCT16	12OCT2016	12	Entered	60	Female	10NOV16	292	MF4637	>=250 mg/day	Yes	Yes	>=250 mg/day	No	Yes	Yes	Yes	Yes
Visit 1	3	DYSLIPIDEMIA	endocrine	Yes	Yes	12_040		1996				Yes		Yes	No	Yes		No			12OCT16	12OCT2016	12	Entered	60	Female	10NOV16	292	MF4637	>=250 mg/day	Yes	Yes	>=250 mg/day	No	Yes	Yes	Yes	Yes
Visit 1	4	OBESITY	endocrine	Yes	Yes	12_040		2007				Yes		Yes	No	Yes		No			12OCT16	12OCT2016	12	Entered	60	Female	10NOV16	292	MF4637	>=250 mg/day	Yes	Yes	>=250 mg/day	No	Yes	Yes	Yes	Yes
Visit 1	5	CHRONIC OBSTRUCTIVE PULMONARY DISEASE	eyes, ears, nose, throat	Yes	Yes	12_040		2006				Yes		Yes	No	Yes		No			12OCT16	12OCT2016	12	Entered	60	Female	10NOV16	292	MF4637	>=250 mg/day	Yes	Yes	>=250 mg/day	No	Yes	Yes	Yes	Yes
Visit 1	6	SLEEP APNEA	eyes, ears, nose, throat	Yes	Yes	12_040		2011				Yes		Yes	No	Yes		No			12OCT16	12OCT2016	12	Entered	60	Female	10NOV16	292	MF4637	>=250 mg/day	Yes	Yes	>=250 mg/day	No	Yes	Yes	Yes	Yes
Visit 1	7	OSTEOARTHRITIS	musculoskeletal	Yes	Yes	12_040		1980				Yes		Yes	No	Yes		No			12OCT16	12OCT2016	12	Entered	60	Female	10NOV16	292	MF4637	>=250 mg/day	Yes	Yes	>=250 mg/day	No	Yes	Yes	Yes	Yes
Visit 1	8	POSTMENOPAUSAL	genital/urinary	Yes	Yes	12_040		2005				Yes		Yes	No	Yes		No			12OCT16	12OCT2016	12	Entered	60	Female	10NOV16	292	MF4637	>=250 mg/day	Yes	Yes	>=250 mg/day	No	Yes	Yes	Yes	Yes
Visit 1	9	SCHIZOPHRENIA	psychological	Yes	Yes	12_040		1992				Yes		Yes	No	Yes		No			12OCT16	12OCT2016	12	Entered	60	Female	10NOV16	292	MF4637	>=250 mg/day	Yes	Yes	>=250 mg/day	No	Yes	Yes	Yes	Yes
Visit 1	10	GASTROESOPHAGEAL REFLUX DISEASE	gastrointestinal	Yes	Yes	12_040		2006				Yes		Yes	No	Yes		No			12OCT16	12OCT2016	12	Entered	60	Female	10NOV16	292	MF4637	>=250 mg/day	Yes	Yes	>=250 mg/day	No	Yes	Yes	Yes	Yes
Visit 1	11	URINARY INCONTINENCE	genital/urinary	Yes	Yes	12_040		2011				Yes		Yes	No	Yes		No			12OCT16	12OCT2016	12	Entered	60	Female	10NOV16	292	MF4637	>=250 mg/day	Yes	Yes	>=250 mg/day	No	Yes	Yes	Yes	Yes
Visit 1	12	ALLERGIC RHINITIS	allergies	Yes	Yes	12_040		1970				Yes		Yes	No	Yes		No			12OCT16	12OCT2016	12	Entered	60	Female	10NOV16	292	MF4637	>=250 mg/day	Yes	Yes	>=250 mg/day	No	Yes	Yes	Yes	Yes
Visit 1	13	VERRUCA VULGARIS	dermatological	Yes	Yes	12_040		2001				Yes		Yes	No	Yes		No			12OCT16	12OCT2016	12	Entered	60	Female	10NOV16	292	MF4637	>=250 mg/day	Yes	Yes	>=250 mg/day	No	Yes	Yes	Yes	Yes
Visit 1	14	NEOPLASMA OF UNCERTAIN BEHAVIOR OF SKIN	dermatological	Yes		12_040		2011		2011		Yes		Yes	No	Yes		No			12OCT16	12OCT2016	12	Entered	60	Female	10NOV16	292	MF4637	>=250 mg/day	Yes	Yes	>=250 mg/day	No	Yes	Yes	Yes	Yes
Visit 1	15	APPENDICITIS	gastrointestinal	Yes		12_040		1974		1974		Yes		Yes	No	Yes		No			12OCT16	12OCT2016	12	Entered	60	Female	10NOV16	292	MF4637	>=250 mg/day	Yes	Yes	>=250 mg/day	No	Yes	Yes	Yes	Yes
Visit 1	16	APPENDECTOMY	surgeries	Yes		12_040		1974		1974		Yes		Yes	No	Yes		No			12OCT16	12OCT2016	12	Entered	60	Female	10NOV16	292	MF4637	>=250 mg/day	Yes	Yes	>=250 mg/day	No	Yes	Yes	Yes	Yes
Visit 1	17	COLON DIVERTICULOSIS	gastrointestinal	Yes	Yes	12_040		2012				Yes		Yes	No	Yes		No			12OCT16	12OCT2016	12	Entered	60	Female	10NOV16	292	MF4637	>=250 mg/day	Yes	Yes	>=250 mg/day	No	Yes	Yes	Yes	Yes
Visit 1	18	HEMORRHOIDS	gastrointestinal	Yes	Yes	12_040		2012				Yes		Yes	No	Yes		No			12OCT16	12OCT2016	12	Entered	60	Female	10NOV16	292	MF4637	>=250 mg/day	Yes	Yes	>=250 mg/day	No	Yes	Yes	Yes	Yes
Visit 1	19	DIABETIC NEUROPATHY	endocrine	Yes	Yes	12_040		2010				Yes		Yes	No	Yes		No			12OCT16	12OCT2016	12	Entered	60	Female	10NOV16	292	MF4637	>=250 mg/day	Yes	Yes	>=250 mg/day	No	Yes	Yes	Yes	Yes
Visit 1	20	DEPRESSION	psychological	Yes	Yes	12_040		1992				Yes		Yes	No	Yes		No			12OCT16	12OCT2016	12	Entered	60	Female	10NOV16	292	MF4637	>=250 mg/day	Yes	Yes	>=250 mg/day	No	Yes	Yes	Yes	Yes
Visit 1	21	ANXIETY	psychological	Yes	Yes	12_040		1992				Yes		Yes	No	Yes		No			12OCT16	12OCT2016	12	Entered	60	Female	10NOV16	292	MF4637	>=250 mg/day	Yes	Yes	>=250 mg/day	No	Yes	Yes	Yes	Yes
Visit 1	22	INSOMNIA	psychological	Yes	Yes	12_040		1992				Yes		Yes	No	Yes		No			12OCT16	12OCT2016	12	Entered	60	Female	10NOV16	292	MF4637	>=250 mg/day	Yes	Yes	>=250 mg/day	No	Yes	Yes	Yes	Yes
Visit 1	23	DRY EYE SYNDROME	eyes, ears, nose, throat	Yes	Yes	12_040		2015				Yes		Yes	No	Yes		No			12OCT16	12OCT2016	12	Entered	60	Female	10NOV16	292	MF4637	>=250 mg/day	Yes	Yes	>=250 mg/day	No	Yes	Yes	Yes	Yes
Visit 1	24	CHRONIC IDIOPHATIC CONSTIPATION	gastrointestinal	Yes	Yes	12_040		1968				Yes		Yes	No	Yes		No			12OCT16	12OCT2016	12	Entered	60	Female	10NOV16	292	MF4637	>=250 mg/day	Yes	Yes	>=250 mg/day	No	Yes	Yes	Yes	Yes
Visit 1	25	ALLERGIC CONJUNCTIVITIS	eyes, ears, nose, throat	Yes		12_040	20SEP16	20SEP2016	05OCT16	05OCT2016		Yes		Yes	No	Yes		No			12OCT16	12OCT2016	12	Entered	60	Female	10NOV16	292	MF4637	>=250 mg/day	Yes	Yes	>=250 mg/day	No	Yes	Yes	Yes	Yes
Visit 1	26	PERITONITIS DUE TO APENDICITIS	gastrointestinal	Yes		12_040		1974		1974		Yes		Yes	No	Yes		No			12OCT16	12OCT2016	12	Entered	60	Female	10NOV16	292	MF4637	>=250 mg/day	Yes	Yes	>=250 mg/day	No	Yes	Yes	Yes	Yes
Visit 1	27	COLONIC POLYPS	gastrointestinal	Yes	Yes	12_040		2011				Yes		Yes	No	Yes		No			12OCT16	12OCT2016	12	Entered	60	Female	10NOV16	292	MF4637	>=250 mg/day	Yes	Yes	>=250 mg/day	No	Yes	Yes	Yes	Yes
Visit 2	1	DIABETES MELLITUS TYPE II	endocrine	Yes	Yes	12_040		2008					No										12	Entered	60	Female	10NOV16	292	MF4637	>=250 mg/day	Yes	Yes	>=250 mg/day	No	Yes	Yes	Yes	Yes
Visit 2	2	HYPERTENSION	cardiovascular	Yes	Yes	12_040		2009					No										12	Entered	60	Female	10NOV16	292	MF4637	>=250 mg/day	Yes	Yes	>=250 mg/day	No	Yes	Yes	Yes	Yes
Visit 2	3	DYSLIPIDEMIA	endocrine	Yes	Yes	12_040		1996					No										12	Entered	60	Female	10NOV16	292	MF4637	>=250 mg/day	Yes	Yes	>=250 mg/day	No	Yes	Yes	Yes	Yes
Visit 2	4	OBESITY	endocrine	Yes	Yes	12_040		2007					No										12	Entered	60	Female	10NOV16	292	MF4637	>=250 mg/day	Yes	Yes	>=250 mg/day	No	Yes	Yes	Yes	Yes
Visit 2	5	CHRONIC OBSTRUCTIVE PULMONARY DISEASE	eyes, ears, nose, throat	Yes	Yes	12_040		2006					No										12	Entered	60	Female	10NOV16	292	MF4637	>=250 mg/day	Yes	Yes	>=250 mg/day	No	Yes	Yes	Yes	Yes
Visit 2	6	SLEEP APNEA	eyes, ears, nose, throat	Yes	Yes	12_040		2011					No										12	Entered	60	Female	10NOV16	292	MF4637	>=250 mg/day	Yes	Yes	>=250 mg/day	No	Yes	Yes	Yes	Yes
Visit 2	7	OSTEOARTHRITIS	musculoskeletal	Yes	Yes	12_040		1980					No										12	Entered	60	Female	10NOV16	292	MF4637	>=250 mg/day	Yes	Yes	>=250 mg/day	No	Yes	Yes	Yes	Yes
Visit 2	8	POSTMENOPAUSAL	genital/urinary	Yes	Yes	12_040		2005					No										12	Entered	60	Female	10NOV16	292	MF4637	>=250 mg/day	Yes	Yes	>=250 mg/day	No	Yes	Yes	Yes	Yes
Visit 2	9	SCHIZOPHRENIA	psychological	Yes	Yes	12_040		1992					No										12	Entered	60	Female	10NOV16	292	MF4637	>=250 mg/day	Yes	Yes	>=250 mg/day	No	Yes	Yes	Yes	Yes
Visit 2	10	GASTROESOPHAGEAL REFLUX DISEASE	gastrointestinal	Yes	Yes	12_040		2006					No										12	Entered	60	Female	10NOV16	292	MF4637	>=250 mg/day	Yes	Yes	>=250 mg/day	No	Yes	Yes	Yes	Yes
Visit 2	11	URINARY INCONTINENCE	genital/urinary	Yes	Yes	12_040		2011					No										12	Entered	60	Female	10NOV16	292	MF4637	>=250 mg/day	Yes	Yes	>=250 mg/day	No	Yes	Yes	Yes	Yes
Visit 2	12	ALLERGIC RHINITIS	allergies	Yes	Yes	12_040		1970					No										12	Entered	60	Female	10NOV16	292	MF4637	>=250 mg/day	Yes	Yes	>=250 mg/day	No	Yes	Yes	Yes	Yes
Visit 2	13	VERRUCA VULGARIS	dermatological	Yes	Yes	12_040		2001					No										12	Entered	60	Female	10NOV16	292	MF4637	>=250 mg/day	Yes	Yes	>=250 mg/day	No	Yes	Yes	Yes	Yes
Visit 2	14	NEOPLASMA OF UNCERTAIN BEHAVIOR OF SKIN	dermatological	Yes		12_040		2011		2011			No										12	Entered	60	Female	10NOV16	292	MF4637	>=250 mg/day	Yes	Yes	>=250 mg/day	No	Yes	Yes	Yes	Yes
Visit 2	15	APPENDICITIS	gastrointestinal	Yes		12_040		1974		1974			No										12	Entered	60	Female	10NOV16	292	MF4637	>=250 mg/day	Yes	Yes	>=250 mg/day	No	Yes	Yes	Yes	Yes
Visit 2	16	APPENDECTOMY	surgeries	Yes		12_040		1974		1974			No										12	Entered	60	Female	10NOV16	292	MF4637	>=250 mg/day	Yes	Yes	>=250 mg/day	No	Yes	Yes	Yes	Yes
Visit 2	17	COLON DIVERTICULOSIS	gastrointestinal	Yes	Yes	12_040		2012					No										12	Entered	60	Female	10NOV16	292	MF4637	>=250 mg/day	Yes	Yes	>=250 mg/day	No	Yes	Yes	Yes	Yes
Visit 2	18	HEMORRHOIDS	gastrointestinal	Yes	Yes	12_040		2012					No										12	Entered	60	Female	10NOV16	292	MF4637	>=250 mg/day	Yes	Yes	>=250 mg/day	No	Yes	Yes	Yes	Yes
Visit 2	19	DIABETIC NEUROPATHY	endocrine	Yes	Yes	12_040		2010					No										12	Entered	60	Female	10NOV16	292	MF4637	>=250 mg/day	Yes	Yes	>=250 mg/day	No	Yes	Yes	Yes	Yes
Visit 2	20	DEPRESSION	psychological	Yes	Yes	12_040		1992					No										12	Entered	60	Female	10NOV16	292	MF4637	>=250 mg/day	Yes	Yes	>=250 mg/day	No	Yes	Yes	Yes	Yes
Visit 2	21	ANXIETY	psychological	Yes	Yes	12_040		1992					No										12	Entered	60	Female	10NOV16	292	MF4637	>=250 mg/day	Yes	Yes	>=250 mg/day	No	Yes	Yes	Yes	Yes
Visit 2	22	INSOMNIA	psychological	Yes	Yes	12_040		1992					No										12	Entered	60	Female	10NOV16	292	MF4637	>=250 mg/day	Yes	Yes	>=250 mg/day	No	Yes	Yes	Yes	Yes
Visit 2	23	DRY EYE SYNDROME	eyes, ears, nose, throat	Yes	Yes	12_040		2015					No										12	Entered	60	Female	10NOV16	292	MF4637	>=250 mg/day	Yes	Yes	>=250 mg/day	No	Yes	Yes	Yes	Yes
Visit 2	24	CHRONIC IDIOPHATIC CONSTIPATION	gastrointestinal	Yes	Yes	12_040		1968					No										12	Entered	60	Female	10NOV16	292	MF4637	>=250 mg/day	Yes	Yes	>=250 mg/day	No	Yes	Yes	Yes	Yes
Visit 2	25	ALLERGIC CONJUNCTIVITIS	eyes, ears, nose, throat	Yes		12_040	20SEP16	20SEP2016	05OCT16	05OCT2016			No										12	Entered	60	Female	10NOV16	292	MF4637	>=250 mg/day	Yes	Yes	>=250 mg/day	No	Yes	Yes	Yes	Yes
Visit 2	26	PERITONITIS DUE TO APENDICITIS	gastrointestinal	Yes		12_040		1974		1974			No										12	Entered	60	Female	10NOV16	292	MF4637	>=250 mg/day	Yes	Yes	>=250 mg/day	No	Yes	Yes	Yes	Yes
Visit 2	27	COLONIC POLYPS	gastrointestinal	Yes	Yes	12_040		2011					No										12	Entered	60	Female	10NOV16	292	MF4637	>=250 mg/day	Yes	Yes	>=250 mg/day	No	Yes	Yes	Yes	Yes
Visit 1	1	DIABETES MELLITUS TYPE II	endocrine	Yes	Yes	12_041		2014				Yes		Yes	No	Yes		No			13OCT16	13OCT2016	12	Early Termination	54	Female	10NOV16	293	Placebo	>=250 mg/day	Yes	Yes	>=250 mg/day	No	Yes	Yes	Yes	Yes
Visit 1	2	HYPERTENSION	cardiovascular	Yes	Yes	12_041		2000				Yes		Yes	No	Yes		No			13OCT16	13OCT2016	12	Early Termination	54	Female	10NOV16	293	Placebo	>=250 mg/day	Yes	Yes	>=250 mg/day	No	Yes	Yes	Yes	Yes
Visit 1	3	DYSLIPIDEMIA	endocrine	Yes	Yes	12_041		2015				Yes		Yes	No	Yes		No			13OCT16	13OCT2016	12	Early Termination	54	Female	10NOV16	293	Placebo	>=250 mg/day	Yes	Yes	>=250 mg/day	No	Yes	Yes	Yes	Yes
Visit 1	4	HIATAL HERNIA	gastrointestinal	Yes	Yes	12_041		2010				Yes		Yes	No	Yes		No			13OCT16	13OCT2016	12	Early Termination	54	Female	10NOV16	293	Placebo	>=250 mg/day	Yes	Yes	>=250 mg/day	No	Yes	Yes	Yes	Yes
Visit 1	5	GASTROESOPHAGEAL REFLUX DISEASE	gastrointestinal	Yes	Yes	12_041		2008				Yes		Yes	No	Yes		No			13OCT16	13OCT2016	12	Early Termination	54	Female	10NOV16	293	Placebo	>=250 mg/day	Yes	Yes	>=250 mg/day	No	Yes	Yes	Yes	Yes
Visit 1	6	PENICILLIN ALLERGY	allergies	Yes	Yes	12_041		1970				Yes		Yes	No	Yes		No			13OCT16	13OCT2016	12	Early Termination	54	Female	10NOV16	293	Placebo	>=250 mg/day	Yes	Yes	>=250 mg/day	No	Yes	Yes	Yes	Yes
Visit 1	7	LIDOCAINE ALLERGY	allergies	Yes	Yes	12_041		2002				Yes		Yes	No	Yes		No			13OCT16	13OCT2016	12	Early Termination	54	Female	10NOV16	293	Placebo	>=250 mg/day	Yes	Yes	>=250 mg/day	No	Yes	Yes	Yes	Yes
Visit 1	8	OSTEOARTHRITIS	musculoskeletal	Yes	Yes	12_041		2010				Yes		Yes	No	Yes		No			13OCT16	13OCT2016	12	Early Termination	54	Female	10NOV16	293	Placebo	>=250 mg/day	Yes	Yes	>=250 mg/day	No	Yes	Yes	Yes	Yes
Visit 1	9	BENIGN KNEE CYST (RIGHT)	dermatological	Yes	Yes	12_041		2015				Yes		Yes	No	Yes		No			13OCT16	13OCT2016	12	Early Termination	54	Female	10NOV16	293	Placebo	>=250 mg/day	Yes	Yes	>=250 mg/day	No	Yes	Yes	Yes	Yes
Visit 1	10	RENAL LITHIASIS	genital/urinary	Yes		12_041		2013		2013		Yes		Yes	No	Yes		No			13OCT16	13OCT2016	12	Early Termination	54	Female	10NOV16	293	Placebo	>=250 mg/day	Yes	Yes	>=250 mg/day	No	Yes	Yes	Yes	Yes
Visit 1	11	RENAL LITHOTRIPSY	genital/urinary	Yes		12_041		2013		2013		Yes		Yes	No	Yes		No			13OCT16	13OCT2016	12	Early Termination	54	Female	10NOV16	293	Placebo	>=250 mg/day	Yes	Yes	>=250 mg/day	No	Yes	Yes	Yes	Yes
Visit 1	12	RIGHT INGUINAL HERNIA	gastrointestinal	Yes		12_041		2002		2002		Yes		Yes	No	Yes		No			13OCT16	13OCT2016	12	Early Termination	54	Female	10NOV16	293	Placebo	>=250 mg/day	Yes	Yes	>=250 mg/day	No	Yes	Yes	Yes	Yes
Visit 1	13	RIGHT INGUINAL HERNIA SURGERY	surgeries	Yes		12_041		2002		2002		Yes		Yes	No	Yes		No			13OCT16	13OCT2016	12	Early Termination	54	Female	10NOV16	293	Placebo	>=250 mg/day	Yes	Yes	>=250 mg/day	No	Yes	Yes	Yes	Yes
Visit 1	14	DIVERTICULOSIS OF THE COLON	gastrointestinal	Yes		12_041		2001		2001		Yes		Yes	No	Yes		No			13OCT16	13OCT2016	12	Early Termination	54	Female	10NOV16	293	Placebo	>=250 mg/day	Yes	Yes	>=250 mg/day	No	Yes	Yes	Yes	Yes
Visit 1	15	COLON DIVERTICULOSIS RESECTION	surgeries	Yes		12_041		2001		2001		Yes		Yes	No	Yes		No			13OCT16	13OCT2016	12	Early Termination	54	Female	10NOV16	293	Placebo	>=250 mg/day	Yes	Yes	>=250 mg/day	No	Yes	Yes	Yes	Yes
Visit 1	16	BLADDER PROLAPSE	genital/urinary	Yes		12_041		1993		1993		Yes		Yes	No	Yes		No			13OCT16	13OCT2016	12	Early Termination	54	Female	10NOV16	293	Placebo	>=250 mg/day	Yes	Yes	>=250 mg/day	No	Yes	Yes	Yes	Yes
Visit 1	17	BLADDER PROLAPSE SURGERY	surgeries	Yes		12_041		1993		1993		Yes		Yes	No	Yes		No			13OCT16	13OCT2016	12	Early Termination	54	Female	10NOV16	293	Placebo	>=250 mg/day	Yes	Yes	>=250 mg/day	No	Yes	Yes	Yes	Yes
Visit 1	18	TUMMY TUCK	surgeries	Yes		12_041		2000		2000		Yes		Yes	No	Yes		No			13OCT16	13OCT2016	12	Early Termination	54	Female	10NOV16	293	Placebo	>=250 mg/day	Yes	Yes	>=250 mg/day	No	Yes	Yes	Yes	Yes
Visit 1	19	MYOPIA	eyes, ears, nose, throat	Yes		12_041		1975		2015		Yes		Yes	No	Yes		No			13OCT16	13OCT2016	12	Early Termination	54	Female	10NOV16	293	Placebo	>=250 mg/day	Yes	Yes	>=250 mg/day	No	Yes	Yes	Yes	Yes
Visit 1	20	MYOPIA LASER CORRECTION	surgeries	Yes		12_041		2015		2015		Yes		Yes	No	Yes		No			13OCT16	13OCT2016	12	Early Termination	54	Female	10NOV16	293	Placebo	>=250 mg/day	Yes	Yes	>=250 mg/day	No	Yes	Yes	Yes	Yes
Visit 1	21	LEFT OVARY CYST BENIGN IN NATURE	genital/urinary	Yes		12_041		1996		1996		Yes		Yes	No	Yes		No			13OCT16	13OCT2016	12	Early Termination	54	Female	10NOV16	293	Placebo	>=250 mg/day	Yes	Yes	>=250 mg/day	No	Yes	Yes	Yes	Yes
Visit 1	22	LEFT OVARY CYST BENIGN SURGERY	surgeries	Yes		12_041		1996		1996		Yes		Yes	No	Yes		No			13OCT16	13OCT2016	12	Early Termination	54	Female	10NOV16	293	Placebo	>=250 mg/day	Yes	Yes	>=250 mg/day	No	Yes	Yes	Yes	Yes
Visit 1	23	RIGHT BREAST CYST BENIGN IN NATURE	dermatological	Yes		12_041		1996		1996		Yes		Yes	No	Yes		No			13OCT16	13OCT2016	12	Early Termination	54	Female	10NOV16	293	Placebo	>=250 mg/day	Yes	Yes	>=250 mg/day	No	Yes	Yes	Yes	Yes
Visit 1	24	RIGHT BREAST CYST SURGICAL REMOVAL	surgeries	Yes		12_041		1996		1996		Yes		Yes	No	Yes		No			13OCT16	13OCT2016	12	Early Termination	54	Female	10NOV16	293	Placebo	>=250 mg/day	Yes	Yes	>=250 mg/day	No	Yes	Yes	Yes	Yes
Visit 1	25	POSTMENOPAUSAL	genital/urinary	Yes	Yes	12_041		2009				Yes		Yes	No	Yes		No			13OCT16	13OCT2016	12	Early Termination	54	Female	10NOV16	293	Placebo	>=250 mg/day	Yes	Yes	>=250 mg/day	No	Yes	Yes	Yes	Yes
Visit 1	26	OVERWEIGHT	endocrine	Yes	Yes	12_041		2009				Yes		Yes	No	Yes		No			13OCT16	13OCT2016	12	Early Termination	54	Female	10NOV16	293	Placebo	>=250 mg/day	Yes	Yes	>=250 mg/day	No	Yes	Yes	Yes	Yes
Visit 1	27	INSOMNIA	psychological	Yes	Yes	12_041		2002				Yes		Yes	No	Yes		No			13OCT16	13OCT2016	12	Early Termination	54	Female	10NOV16	293	Placebo	>=250 mg/day	Yes	Yes	>=250 mg/day	No	Yes	Yes	Yes	Yes
Visit 1	28	ANXIETY	psychological	Yes	Yes	12_041		2002				Yes		Yes	No	Yes		No			13OCT16	13OCT2016	12	Early Termination	54	Female	10NOV16	293	Placebo	>=250 mg/day	Yes	Yes	>=250 mg/day	No	Yes	Yes	Yes	Yes
Visit 1	29	CIPROFLOXACIN ALLERGY	allergies	Yes	Yes	12_041		1970				Yes		Yes	No	Yes		No			13OCT16	13OCT2016	12	Early Termination	54	Female	10NOV16	293	Placebo	>=250 mg/day	Yes	Yes	>=250 mg/day	No	Yes	Yes	Yes	Yes
Visit 1	30	PROPOFOL ALLERGY	allergies	Yes	Yes	12_041		2002				Yes		Yes	No	Yes		No			13OCT16	13OCT2016	12	Early Termination	54	Female	10NOV16	293	Placebo	>=250 mg/day	Yes	Yes	>=250 mg/day	No	Yes	Yes	Yes	Yes
Visit 1	31	IRRITABLE BOWEL SYNDROME	gastrointestinal	Yes	Yes	12_041		2015				Yes		Yes	No	Yes		No			13OCT16	13OCT2016	12	Early Termination	54	Female	10NOV16	293	Placebo	>=250 mg/day	Yes	Yes	>=250 mg/day	No	Yes	Yes	Yes	Yes
Visit 1	32	DEPRESSION	psychological	Yes	Yes	12_041		2016				Yes		Yes	No	Yes		No			13OCT16	13OCT2016	12	Early Termination	54	Female	10NOV16	293	Placebo	>=250 mg/day	Yes	Yes	>=250 mg/day	No	Yes	Yes	Yes	Yes
Visit 1	33	VAGINAL DRYNESS	genital/urinary	Yes	Yes	12_041		2014				Yes		Yes	No	Yes		No			13OCT16	13OCT2016	12	Early Termination	54	Female	10NOV16	293	Placebo	>=250 mg/day	Yes	Yes	>=250 mg/day	No	Yes	Yes	Yes	Yes
Visit 2	1	DIABETES MELLITUS TYPE II	endocrine	Yes	Yes	12_041		2014					No										12	Early Termination	54	Female	10NOV16	293	Placebo	>=250 mg/day	Yes	Yes	>=250 mg/day	No	Yes	Yes	Yes	Yes
Visit 2	2	HYPERTENSION	cardiovascular	Yes	Yes	12_041		2000					No										12	Early Termination	54	Female	10NOV16	293	Placebo	>=250 mg/day	Yes	Yes	>=250 mg/day	No	Yes	Yes	Yes	Yes
Visit 2	3	DYSLIPIDEMIA	endocrine	Yes	Yes	12_041		2015					No										12	Early Termination	54	Female	10NOV16	293	Placebo	>=250 mg/day	Yes	Yes	>=250 mg/day	No	Yes	Yes	Yes	Yes
Visit 2	4	HIATAL HERNIA	gastrointestinal	Yes	Yes	12_041		2010					No										12	Early Termination	54	Female	10NOV16	293	Placebo	>=250 mg/day	Yes	Yes	>=250 mg/day	No	Yes	Yes	Yes	Yes
Visit 2	5	GASTROESOPHAGEAL REFLUX DISEASE	gastrointestinal	Yes	Yes	12_041		2008					No										12	Early Termination	54	Female	10NOV16	293	Placebo	>=250 mg/day	Yes	Yes	>=250 mg/day	No	Yes	Yes	Yes	Yes
Visit 2	6	PENICILLIN ALLERGY	allergies	Yes	Yes	12_041		1970					No										12	Early Termination	54	Female	10NOV16	293	Placebo	>=250 mg/day	Yes	Yes	>=250 mg/day	No	Yes	Yes	Yes	Yes
Visit 2	7	LIDOCAINE ALLERGY	allergies	Yes	Yes	12_041		2002					No										12	Early Termination	54	Female	10NOV16	293	Placebo	>=250 mg/day	Yes	Yes	>=250 mg/day	No	Yes	Yes	Yes	Yes
Visit 2	8	OSTEOARTHRITIS	musculoskeletal	Yes	Yes	12_041		2010					No										12	Early Termination	54	Female	10NOV16	293	Placebo	>=250 mg/day	Yes	Yes	>=250 mg/day	No	Yes	Yes	Yes	Yes
Visit 2	9	BENIGN KNEE CYST (RIGHT)	dermatological	Yes	Yes	12_041		2015					No										12	Early Termination	54	Female	10NOV16	293	Placebo	>=250 mg/day	Yes	Yes	>=250 mg/day	No	Yes	Yes	Yes	Yes
Visit 2	10	RENAL LITHIASIS	genital/urinary	Yes		12_041		2013		2013			No										12	Early Termination	54	Female	10NOV16	293	Placebo	>=250 mg/day	Yes	Yes	>=250 mg/day	No	Yes	Yes	Yes	Yes
Visit 2	11	RENAL LITHOTRIPSY	genital/urinary	Yes		12_041		2013		2013			No										12	Early Termination	54	Female	10NOV16	293	Placebo	>=250 mg/day	Yes	Yes	>=250 mg/day	No	Yes	Yes	Yes	Yes
Visit 2	12	RIGHT INGUINAL HERNIA	gastrointestinal	Yes		12_041		2002		2002			No										12	Early Termination	54	Female	10NOV16	293	Placebo	>=250 mg/day	Yes	Yes	>=250 mg/day	No	Yes	Yes	Yes	Yes
Visit 2	13	RIGHT INGUINAL HERNIA SURGERY	surgeries	Yes		12_041		2002		2002			No										12	Early Termination	54	Female	10NOV16	293	Placebo	>=250 mg/day	Yes	Yes	>=250 mg/day	No	Yes	Yes	Yes	Yes
Visit 2	14	DIVERTICULOSIS OF THE COLON	gastrointestinal	Yes		12_041		2001		2001			No										12	Early Termination	54	Female	10NOV16	293	Placebo	>=250 mg/day	Yes	Yes	>=250 mg/day	No	Yes	Yes	Yes	Yes
Visit 2	15	COLON DIVERTICULOSIS RESECTION	surgeries	Yes		12_041		2001		2001			No										12	Early Termination	54	Female	10NOV16	293	Placebo	>=250 mg/day	Yes	Yes	>=250 mg/day	No	Yes	Yes	Yes	Yes
Visit 2	16	BLADDER PROLAPSE	genital/urinary	Yes		12_041		1993		1993			No										12	Early Termination	54	Female	10NOV16	293	Placebo	>=250 mg/day	Yes	Yes	>=250 mg/day	No	Yes	Yes	Yes	Yes
Visit 2	17	BLADDER PROLAPSE SURGERY	surgeries	Yes		12_041		1993		1993			No										12	Early Termination	54	Female	10NOV16	293	Placebo	>=250 mg/day	Yes	Yes	>=250 mg/day	No	Yes	Yes	Yes	Yes
Visit 2	18	TUMMY TUCK	surgeries	Yes		12_041		2000		2000			No										12	Early Termination	54	Female	10NOV16	293	Placebo	>=250 mg/day	Yes	Yes	>=250 mg/day	No	Yes	Yes	Yes	Yes
Visit 2	19	MYOPIA	eyes, ears, nose, throat	Yes		12_041		1975		2015			No										12	Early Termination	54	Female	10NOV16	293	Placebo	>=250 mg/day	Yes	Yes	>=250 mg/day	No	Yes	Yes	Yes	Yes
Visit 2	20	MYOPIA LASER CORRECTION	surgeries	Yes		12_041		2015		2015			No										12	Early Termination	54	Female	10NOV16	293	Placebo	>=250 mg/day	Yes	Yes	>=250 mg/day	No	Yes	Yes	Yes	Yes
Visit 2	21	LEFT OVARY CYST BENIGN IN NATURE	genital/urinary	Yes		12_041		1996		1996			No										12	Early Termination	54	Female	10NOV16	293	Placebo	>=250 mg/day	Yes	Yes	>=250 mg/day	No	Yes	Yes	Yes	Yes
Visit 2	22	LEFT OVARY CYST BENIGN SURGERY	surgeries	Yes		12_041		1996		1996			No										12	Early Termination	54	Female	10NOV16	293	Placebo	>=250 mg/day	Yes	Yes	>=250 mg/day	No	Yes	Yes	Yes	Yes
Visit 2	23	RIGHT BREAST CYST BENIGN IN NATURE	dermatological	Yes		12_041		1996		1996			No										12	Early Termination	54	Female	10NOV16	293	Placebo	>=250 mg/day	Yes	Yes	>=250 mg/day	No	Yes	Yes	Yes	Yes
Visit 2	24	RIGHT BREAST CYST SURGICAL REMOVAL	surgeries	Yes		12_041		1996		1996			No										12	Early Termination	54	Female	10NOV16	293	Placebo	>=250 mg/day	Yes	Yes	>=250 mg/day	No	Yes	Yes	Yes	Yes
Visit 2	25	POSTMENOPAUSAL	genital/urinary	Yes	Yes	12_041		2009					No										12	Early Termination	54	Female	10NOV16	293	Placebo	>=250 mg/day	Yes	Yes	>=250 mg/day	No	Yes	Yes	Yes	Yes
Visit 2	26	OVERWEIGHT	endocrine	Yes	Yes	12_041		2009					No										12	Early Termination	54	Female	10NOV16	293	Placebo	>=250 mg/day	Yes	Yes	>=250 mg/day	No	Yes	Yes	Yes	Yes
Visit 2	27	INSOMNIA	psychological	Yes	Yes	12_041		2002					No										12	Early Termination	54	Female	10NOV16	293	Placebo	>=250 mg/day	Yes	Yes	>=250 mg/day	No	Yes	Yes	Yes	Yes
Visit 2	28	ANXIETY	psychological	Yes	Yes	12_041		2002					No										12	Early Termination	54	Female	10NOV16	293	Placebo	>=250 mg/day	Yes	Yes	>=250 mg/day	No	Yes	Yes	Yes	Yes
Visit 2	29	CIPROFLOXACIN ALLERGY	allergies	Yes	Yes	12_041		1970					No										12	Early Termination	54	Female	10NOV16	293	Placebo	>=250 mg/day	Yes	Yes	>=250 mg/day	No	Yes	Yes	Yes	Yes
Visit 2	30	PROPOFOL ALLERGY	allergies	Yes	Yes	12_041		2002					No										12	Early Termination	54	Female	10NOV16	293	Placebo	>=250 mg/day	Yes	Yes	>=250 mg/day	No	Yes	Yes	Yes	Yes
Visit 2	31	IRRITABLE BOWEL SYNDROME	gastrointestinal	Yes	Yes	12_041		2015					No										12	Early Termination	54	Female	10NOV16	293	Placebo	>=250 mg/day	Yes	Yes	>=250 mg/day	No	Yes	Yes	Yes	Yes
Visit 1	1	DIABETES MELLITUS TYPE II	endocrine	Yes	Yes	12_043		2010				Yes		Yes	No	Yes		No			13OCT16	13OCT2016	12	Entered	77	Male	03NOV16	283	MF4637	>=250 mg/day	Yes	Yes	>=250 mg/day	No	Yes	Yes	Yes	Yes
Visit 1	2	HYPERTENSION	cardiovascular	Yes	Yes	12_043		2012				Yes		Yes	No	Yes		No			13OCT16	13OCT2016	12	Entered	77	Male	03NOV16	283	MF4637	>=250 mg/day	Yes	Yes	>=250 mg/day	No	Yes	Yes	Yes	Yes
Visit 1	3	DYSLIPIDEMIA	endocrine	Yes	Yes	12_043		2013				Yes		Yes	No	Yes		No			13OCT16	13OCT2016	12	Entered	77	Male	03NOV16	283	MF4637	>=250 mg/day	Yes	Yes	>=250 mg/day	No	Yes	Yes	Yes	Yes
Visit 1	4	GASTROESOPHAGEAL REFLUX DISEASE	gastrointestinal	Yes	Yes	12_043		2014				Yes		Yes	No	Yes		No			13OCT16	13OCT2016	12	Entered	77	Male	03NOV16	283	MF4637	>=250 mg/day	Yes	Yes	>=250 mg/day	No	Yes	Yes	Yes	Yes
Visit 1	5	DIABETIC NEUROPATHY	neurological	Yes	Yes	12_043		2015				Yes		Yes	No	Yes		No			13OCT16	13OCT2016	12	Entered	77	Male	03NOV16	283	MF4637	>=250 mg/day	Yes	Yes	>=250 mg/day	No	Yes	Yes	Yes	Yes
Visit 1	6	RIGHT INGUINAL HERNIA	gastrointestinal	Yes		12_043		DEC2015		DEC2015		Yes		Yes	No	Yes		No			13OCT16	13OCT2016	12	Entered	77	Male	03NOV16	283	MF4637	>=250 mg/day	Yes	Yes	>=250 mg/day	No	Yes	Yes	Yes	Yes
Visit 1	7	RIGHT INGUINAL HERNIA SURGERY	surgeries	Yes		12_043		DEC2015		DEC2015		Yes		Yes	No	Yes		No			13OCT16	13OCT2016	12	Entered	77	Male	03NOV16	283	MF4637	>=250 mg/day	Yes	Yes	>=250 mg/day	No	Yes	Yes	Yes	Yes
Visit 1	8	STROKE	neurological	Yes		12_043	18DEC13	18DEC2013	18DEC13	18DEC2013		Yes		Yes	No	Yes		No			13OCT16	13OCT2016	12	Entered	77	Male	03NOV16	283	MF4637	>=250 mg/day	Yes	Yes	>=250 mg/day	No	Yes	Yes	Yes	Yes
Visit 1	9	LEFT CAROTID STENOSIS	cardiovascular	Yes		12_043	18DEC13	18DEC2013	18DEC13	18DEC2013		Yes		Yes	No	Yes		No			13OCT16	13OCT2016	12	Entered	77	Male	03NOV16	283	MF4637	>=250 mg/day	Yes	Yes	>=250 mg/day	No	Yes	Yes	Yes	Yes
Visit 1	10	LEFT CAROTID ENDARTERECTOMY	cardiovascular	Yes		12_043	18DEC13	18DEC2013	18DEC13	18DEC2013		Yes		Yes	No	Yes		No			13OCT16	13OCT2016	12	Entered	77	Male	03NOV16	283	MF4637	>=250 mg/day	Yes	Yes	>=250 mg/day	No	Yes	Yes	Yes	Yes
Visit 1	11	OVERWEIGHT	endocrine	Yes	Yes	12_043		2009				Yes		Yes	No	Yes		No			13OCT16	13OCT2016	12	Entered	77	Male	03NOV16	283	MF4637	>=250 mg/day	Yes	Yes	>=250 mg/day	No	Yes	Yes	Yes	Yes
Visit 1	12	DEPRESSION	psychological	Yes	Yes	12_043		2011				Yes		Yes	No	Yes		No			13OCT16	13OCT2016	12	Entered	77	Male	03NOV16	283	MF4637	>=250 mg/day	Yes	Yes	>=250 mg/day	No	Yes	Yes	Yes	Yes
Visit 1	13	MEMORY LOSS	neurological	Yes	Yes	12_043		2015				Yes		Yes	No	Yes		No			13OCT16	13OCT2016	12	Entered	77	Male	03NOV16	283	MF4637	>=250 mg/day	Yes	Yes	>=250 mg/day	No	Yes	Yes	Yes	Yes
Visit 1	14	INSOMNIA	psychological	Yes	Yes	12_043		2011				Yes		Yes	No	Yes		No			13OCT16	13OCT2016	12	Entered	77	Male	03NOV16	283	MF4637	>=250 mg/day	Yes	Yes	>=250 mg/day	No	Yes	Yes	Yes	Yes
Visit 1	15	ANXIETY	psychological	Yes	Yes	12_043		2011				Yes		Yes	No	Yes		No			13OCT16	13OCT2016	12	Entered	77	Male	03NOV16	283	MF4637	>=250 mg/day	Yes	Yes	>=250 mg/day	No	Yes	Yes	Yes	Yes
Visit 1	16	OSTEOPOROSIS	musculoskeletal	Yes	Yes	12_043		2014				Yes		Yes	No	Yes		No			13OCT16	13OCT2016	12	Entered	77	Male	03NOV16	283	MF4637	>=250 mg/day	Yes	Yes	>=250 mg/day	No	Yes	Yes	Yes	Yes
Visit 1	17	OSTEOARTHROSIS	musculoskeletal	Yes	Yes	12_043		2014				Yes		Yes	No	Yes		No			13OCT16	13OCT2016	12	Entered	77	Male	03NOV16	283	MF4637	>=250 mg/day	Yes	Yes	>=250 mg/day	No	Yes	Yes	Yes	Yes
Visit 1	18	CHRONIC OBSTRUCTIVE PULMONARY DISEASE	eyes, ears, nose, throat	Yes	Yes	12_043		2006				Yes		Yes	No	Yes		No			13OCT16	13OCT2016	12	Entered	77	Male	03NOV16	283	MF4637	>=250 mg/day	Yes	Yes	>=250 mg/day	No	Yes	Yes	Yes	Yes
Visit 1	19	DRY EYES	eyes, ears, nose, throat	Yes	Yes	12_043	12SEP16	12SEP2016				Yes		Yes	No	Yes		No			13OCT16	13OCT2016	12	Entered	77	Male	03NOV16	283	MF4637	>=250 mg/day	Yes	Yes	>=250 mg/day	No	Yes	Yes	Yes	Yes
Visit 1	20	HEMORRHOIDS	gastrointestinal	Yes	Yes	12_043		2015				Yes		Yes	No	Yes		No			13OCT16	13OCT2016	12	Entered	77	Male	03NOV16	283	MF4637	>=250 mg/day	Yes	Yes	>=250 mg/day	No	Yes	Yes	Yes	Yes
Visit 1	21	CHRONIC LOW BACK PAIN	musculoskeletal	Yes	Yes	12_043		2013				Yes		Yes	No	Yes		No			13OCT16	13OCT2016	12	Entered	77	Male	03NOV16	283	MF4637	>=250 mg/day	Yes	Yes	>=250 mg/day	No	Yes	Yes	Yes	Yes
Visit 1	22	PERIPHERAL VASCULAR DISEASE	cardiovascular	Yes	Yes	12_043	20OCT15	20OCT2015				Yes		Yes	No	Yes		No			13OCT16	13OCT2016	12	Entered	77	Male	03NOV16	283	MF4637	>=250 mg/day	Yes	Yes	>=250 mg/day	No	Yes	Yes	Yes	Yes
Visit 1	23	ACUTE BRONCHITIS	eyes, ears, nose, throat	Yes		12_043	23MAY16	23MAY2016		JUN2016		Yes		Yes	No	Yes		No			13OCT16	13OCT2016	12	Entered	77	Male	03NOV16	283	MF4637	>=250 mg/day	Yes	Yes	>=250 mg/day	No	Yes	Yes	Yes	Yes
Visit 1	24	BENIGN SOLITARY NODULE OF LUNG	eyes, ears, nose, throat	Yes	Yes	12_043	30AUG16	30AUG2016				Yes		Yes	No	Yes		No			13OCT16	13OCT2016	12	Entered	77	Male	03NOV16	283	MF4637	>=250 mg/day	Yes	Yes	>=250 mg/day	No	Yes	Yes	Yes	Yes
Visit 1	25	INFECTED SEBACEOUS CYST	dermatological	Yes		12_043	23MAY16	23MAY2016		JUN2016		Yes		Yes	No	Yes		No			13OCT16	13OCT2016	12	Entered	77	Male	03NOV16	283	MF4637	>=250 mg/day	Yes	Yes	>=250 mg/day	No	Yes	Yes	Yes	Yes
Visit 1	26	ERECTILE DYSFUNCTION	genital/urinary	Yes	Yes	12_043	23MAY16	23MAY2016				Yes		Yes	No	Yes		No			13OCT16	13OCT2016	12	Entered	77	Male	03NOV16	283	MF4637	>=250 mg/day	Yes	Yes	>=250 mg/day	No	Yes	Yes	Yes	Yes
Visit 1	27	IRON DEFICIENCY ANEMIA	blood/bleeding disorders	Yes	Yes	12_043	23MAY16	23MAY2016				Yes		Yes	No	Yes		No			13OCT16	13OCT2016	12	Entered	77	Male	03NOV16	283	MF4637	>=250 mg/day	Yes	Yes	>=250 mg/day	No	Yes	Yes	Yes	Yes
Visit 1	28	DIVERTICULITIS OF SIGMOID COLON	gastrointestinal	Yes	Yes	12_043		2015				Yes		Yes	No	Yes		No			13OCT16	13OCT2016	12	Entered	77	Male	03NOV16	283	MF4637	>=250 mg/day	Yes	Yes	>=250 mg/day	No	Yes	Yes	Yes	Yes
Visit 1	29	CORONARY ARTERY DISEASE	cardiovascular	Yes	Yes	12_043		2013				Yes		Yes	No	Yes		No			13OCT16	13OCT2016	12	Entered	77	Male	03NOV16	283	MF4637	>=250 mg/day	Yes	Yes	>=250 mg/day	No	Yes	Yes	Yes	Yes
Visit 1	30	LEFT INGUINAL HERNIA	gastrointestinal	Yes	Yes	12_043		2015				Yes		Yes	No	Yes		No			13OCT16	13OCT2016	12	Entered	77	Male	03NOV16	283	MF4637	>=250 mg/day	Yes	Yes	>=250 mg/day	No	Yes	Yes	Yes	Yes
Visit 2	1	DIABETES MELLITUS TYPE II	endocrine	Yes	Yes	12_043		2010					No										12	Entered	77	Male	03NOV16	283	MF4637	>=250 mg/day	Yes	Yes	>=250 mg/day	No	Yes	Yes	Yes	Yes
Visit 2	2	HYPERTENSION	cardiovascular	Yes	Yes	12_043		2012					No										12	Entered	77	Male	03NOV16	283	MF4637	>=250 mg/day	Yes	Yes	>=250 mg/day	No	Yes	Yes	Yes	Yes
Visit 2	3	DYSLIPIDEMIA	endocrine	Yes	Yes	12_043		2013					No										12	Entered	77	Male	03NOV16	283	MF4637	>=250 mg/day	Yes	Yes	>=250 mg/day	No	Yes	Yes	Yes	Yes
Visit 2	4	GASTROESOPHAGEAL REFLUX DISEASE	gastrointestinal	Yes	Yes	12_043		2014					No										12	Entered	77	Male	03NOV16	283	MF4637	>=250 mg/day	Yes	Yes	>=250 mg/day	No	Yes	Yes	Yes	Yes
Visit 2	5	DIABETIC NEUROPATHY	neurological	Yes	Yes	12_043		2015					No										12	Entered	77	Male	03NOV16	283	MF4637	>=250 mg/day	Yes	Yes	>=250 mg/day	No	Yes	Yes	Yes	Yes
Visit 2	6	RIGHT INGUINAL HERNIA	gastrointestinal	Yes		12_043		12UNK2015		12UNK2015			No										12	Entered	77	Male	03NOV16	283	MF4637	>=250 mg/day	Yes	Yes	>=250 mg/day	No	Yes	Yes	Yes	Yes
Visit 2	7	RIGHT INGUINAL HERNIA SURGERY	surgeries	Yes		12_043		12UNK2015		12UNK2015			No										12	Entered	77	Male	03NOV16	283	MF4637	>=250 mg/day	Yes	Yes	>=250 mg/day	No	Yes	Yes	Yes	Yes
Visit 2	8	STROKE	neurological	Yes		12_043		12UNK2010		12UNK2010			No										12	Entered	77	Male	03NOV16	283	MF4637	>=250 mg/day	Yes	Yes	>=250 mg/day	No	Yes	Yes	Yes	Yes
Visit 2	9	LEFT CAROTID STENOSIS	cardiovascular	Yes		12_043		12UNK2013	18DEC13	18DEC2013			No										12	Entered	77	Male	03NOV16	283	MF4637	>=250 mg/day	Yes	Yes	>=250 mg/day	No	Yes	Yes	Yes	Yes
Visit 2	10	LEFT CAROTID ENDARTERECTOMY	cardiovascular	Yes		12_043	18DEC13	18DEC2013	18DEC13	18DEC2013			No										12	Entered	77	Male	03NOV16	283	MF4637	>=250 mg/day	Yes	Yes	>=250 mg/day	No	Yes	Yes	Yes	Yes
Visit 2	11	OVERWEIGHT	endocrine	Yes	Yes	12_043		2009					No										12	Entered	77	Male	03NOV16	283	MF4637	>=250 mg/day	Yes	Yes	>=250 mg/day	No	Yes	Yes	Yes	Yes
Visit 2	12	DEPRESSION	psychological	Yes	Yes	12_043		2011					No										12	Entered	77	Male	03NOV16	283	MF4637	>=250 mg/day	Yes	Yes	>=250 mg/day	No	Yes	Yes	Yes	Yes
Visit 2	13	MEMORY LOSS	neurological	Yes	Yes	12_043		2015					No										12	Entered	77	Male	03NOV16	283	MF4637	>=250 mg/day	Yes	Yes	>=250 mg/day	No	Yes	Yes	Yes	Yes
Visit 2	14	INSOMNIA	psychological	Yes	Yes	12_043		2011					No										12	Entered	77	Male	03NOV16	283	MF4637	>=250 mg/day	Yes	Yes	>=250 mg/day	No	Yes	Yes	Yes	Yes
Visit 2	15	ANXIETY	psychological	Yes	Yes	12_043		2011					No										12	Entered	77	Male	03NOV16	283	MF4637	>=250 mg/day	Yes	Yes	>=250 mg/day	No	Yes	Yes	Yes	Yes
Visit 2	16	OSTEOPOROSIS	musculoskeletal	Yes	Yes	12_043		2014					No										12	Entered	77	Male	03NOV16	283	MF4637	>=250 mg/day	Yes	Yes	>=250 mg/day	No	Yes	Yes	Yes	Yes
Visit 2	17	OSTEOARTHROSIS	musculoskeletal	Yes	Yes	12_043		2014					No										12	Entered	77	Male	03NOV16	283	MF4637	>=250 mg/day	Yes	Yes	>=250 mg/day	No	Yes	Yes	Yes	Yes
Visit 2	18	CHRONIC OBSTRUCTIVE PULMONARY DISEASE	eyes, ears, nose, throat	Yes	Yes	12_043		2006					No										12	Entered	77	Male	03NOV16	283	MF4637	>=250 mg/day	Yes	Yes	>=250 mg/day	No	Yes	Yes	Yes	Yes
Visit 2	19	DRY EYES	eyes, ears, nose, throat	Yes	Yes	12_043	12SEP16	12SEP2016					No										12	Entered	77	Male	03NOV16	283	MF4637	>=250 mg/day	Yes	Yes	>=250 mg/day	No	Yes	Yes	Yes	Yes
Visit 2	20	HEMORRHOIDS	gastrointestinal	Yes	Yes	12_043		2015					No										12	Entered	77	Male	03NOV16	283	MF4637	>=250 mg/day	Yes	Yes	>=250 mg/day	No	Yes	Yes	Yes	Yes
Visit 2	21	CHRONIC LOW BACK PAIN	musculoskeletal	Yes	Yes	12_043		2013					No										12	Entered	77	Male	03NOV16	283	MF4637	>=250 mg/day	Yes	Yes	>=250 mg/day	No	Yes	Yes	Yes	Yes
Visit 2	22	PERIPHERAL VASCULAR DISEASE	cardiovascular	Yes	Yes	12_043	20OCT15	20OCT2015					No										12	Entered	77	Male	03NOV16	283	MF4637	>=250 mg/day	Yes	Yes	>=250 mg/day	No	Yes	Yes	Yes	Yes
Visit 2	23	ACUTE BRONCHITIS	eyes, ears, nose, throat	Yes		12_043	23MAY16	23MAY2016		JUN2016			No										12	Entered	77	Male	03NOV16	283	MF4637	>=250 mg/day	Yes	Yes	>=250 mg/day	No	Yes	Yes	Yes	Yes
Visit 2	24	BENIGN SOLITARY NODULE OF LUNG	eyes, ears, nose, throat	Yes	Yes	12_043	30AUG16	30AUG2016					No										12	Entered	77	Male	03NOV16	283	MF4637	>=250 mg/day	Yes	Yes	>=250 mg/day	No	Yes	Yes	Yes	Yes
Visit 2	25	INFECTED SEBACEOUS CYST	dermatological	Yes		12_043	23MAY16	23MAY2016		JUN2016			No										12	Entered	77	Male	03NOV16	283	MF4637	>=250 mg/day	Yes	Yes	>=250 mg/day	No	Yes	Yes	Yes	Yes
Visit 2	26	ERECTILE DYSFUNCTION	genital/urinary	Yes	Yes	12_043	23MAY16	23MAY2016					No										12	Entered	77	Male	03NOV16	283	MF4637	>=250 mg/day	Yes	Yes	>=250 mg/day	No	Yes	Yes	Yes	Yes
Visit 2	27	IRON DEFICIENCY ANEMIA	blood/bleeding disorders	Yes	Yes	12_043	23MAY16	23MAY2016					No										12	Entered	77	Male	03NOV16	283	MF4637	>=250 mg/day	Yes	Yes	>=250 mg/day	No	Yes	Yes	Yes	Yes
Visit 2	28	DIVERTICULITIS OF SIGMOID COLON	gastrointestinal	Yes	Yes	12_043		2015					No										12	Entered	77	Male	03NOV16	283	MF4637	>=250 mg/day	Yes	Yes	>=250 mg/day	No	Yes	Yes	Yes	Yes
Visit 1	1	DIABETES MELLITUS TYPE II	endocrine	Yes	Yes	12_044		2001				Yes		Yes	No	Yes		No			14OCT16	14OCT2016	12	Entered	66	Male	02NOV16	281	Placebo	>=250 mg/day	Yes	Yes	>=250 mg/day	No	Yes	Yes	Yes	Yes
Visit 1	2	HYPERTENSION	cardiovascular	Yes	Yes	12_044		2005				Yes		Yes	No	Yes		No			14OCT16	14OCT2016	12	Entered	66	Male	02NOV16	281	Placebo	>=250 mg/day	Yes	Yes	>=250 mg/day	No	Yes	Yes	Yes	Yes
Visit 1	3	OVERWEIGHT	endocrine	Yes	Yes	12_044		2010				Yes		Yes	No	Yes		No			14OCT16	14OCT2016	12	Entered	66	Male	02NOV16	281	Placebo	>=250 mg/day	Yes	Yes	>=250 mg/day	No	Yes	Yes	Yes	Yes
Visit 1	4	DYSLIPIDEMIA	endocrine	Yes	Yes	12_044		2010				Yes		Yes	No	Yes		No			14OCT16	14OCT2016	12	Entered	66	Male	02NOV16	281	Placebo	>=250 mg/day	Yes	Yes	>=250 mg/day	No	Yes	Yes	Yes	Yes
Visit 1	5	GASTROESOPHAGEAL RELFUX DISEASE	gastrointestinal	Yes	Yes	12_044		2013				Yes		Yes	No	Yes		No			14OCT16	14OCT2016	12	Entered	66	Male	02NOV16	281	Placebo	>=250 mg/day	Yes	Yes	>=250 mg/day	No	Yes	Yes	Yes	Yes
Visit 1	6	OSTEOARTHRITIS	musculoskeletal	Yes	Yes	12_044		2006				Yes		Yes	No	Yes		No			14OCT16	14OCT2016	12	Entered	66	Male	02NOV16	281	Placebo	>=250 mg/day	Yes	Yes	>=250 mg/day	No	Yes	Yes	Yes	Yes
Visit 1	7	BILATERAL CATARACT	eyes, ears, nose, throat	Yes		12_044		OCT2013		OCT2013		Yes		Yes	No	Yes		No			14OCT16	14OCT2016	12	Entered	66	Male	02NOV16	281	Placebo	>=250 mg/day	Yes	Yes	>=250 mg/day	No	Yes	Yes	Yes	Yes
Visit 1	8	BILATERAL CATARACT SURGERY	surgeries	Yes		12_044		JUN2015		JUN2015		Yes		Yes	No	Yes		No			14OCT16	14OCT2016	12	Entered	66	Male	02NOV16	281	Placebo	>=250 mg/day	Yes	Yes	>=250 mg/day	No	Yes	Yes	Yes	Yes
Visit 1	9	BENIGN COLONIC POLYPS	gastrointestinal	Yes		12_044		MAY2010		MAY2010		Yes		Yes	No	Yes		No			14OCT16	14OCT2016	12	Entered	66	Male	02NOV16	281	Placebo	>=250 mg/day	Yes	Yes	>=250 mg/day	No	Yes	Yes	Yes	Yes
Visit 1	10	BENIGN COLONIC POLYPECTOMY	surgeries	Yes		12_044		MAY2010		MAY2010		Yes		Yes	No	Yes		No			14OCT16	14OCT2016	12	Entered	66	Male	02NOV16	281	Placebo	>=250 mg/day	Yes	Yes	>=250 mg/day	No	Yes	Yes	Yes	Yes
Visit 1	11	LUMBAR SCOLIOSIS	musculoskeletal	Yes	Yes	12_044		2013				Yes		Yes	No	Yes		No			14OCT16	14OCT2016	12	Entered	66	Male	02NOV16	281	Placebo	>=250 mg/day	Yes	Yes	>=250 mg/day	No	Yes	Yes	Yes	Yes
Visit 1	12	PENILE IMPLANT	genital/urinary	Yes	Yes	12_044		MAY2010				Yes		Yes	No	Yes		No			14OCT16	14OCT2016	12	Entered	66	Male	02NOV16	281	Placebo	>=250 mg/day	Yes	Yes	>=250 mg/day	No	Yes	Yes	Yes	Yes
Visit 1	13	VARICOSE VEINS IN BOTH LEGS	cardiovascular	Yes	Yes	12_044		2013				Yes		Yes	No	Yes		No			14OCT16	14OCT2016	12	Entered	66	Male	02NOV16	281	Placebo	>=250 mg/day	Yes	Yes	>=250 mg/day	No	Yes	Yes	Yes	Yes
Visit 1	14	TRAUMA IN RIGHT HAND	musculoskeletal	Yes		12_044		2007		2007		Yes		Yes	No	Yes		No			14OCT16	14OCT2016	12	Entered	66	Male	02NOV16	281	Placebo	>=250 mg/day	Yes	Yes	>=250 mg/day	No	Yes	Yes	Yes	Yes
Visit 1	15	PARTIAL AMPUTATION OF THE 4TH, 5TH FINGER OF THE RIGHT HAND	surgeries	Yes		12_044		2007		2007		Yes		Yes	No	Yes		No			14OCT16	14OCT2016	12	Entered	66	Male	02NOV16	281	Placebo	>=250 mg/day	Yes	Yes	>=250 mg/day	No	Yes	Yes	Yes	Yes
Visit 1	16	RECONSTRUCTION OF THE 1ST, 3RD FINGER OF THE RIGHT HAND	surgeries	Yes		12_044		2007		2007		Yes		Yes	No	Yes		No			14OCT16	14OCT2016	12	Entered	66	Male	02NOV16	281	Placebo	>=250 mg/day	Yes	Yes	>=250 mg/day	No	Yes	Yes	Yes	Yes
Visit 2	1	DIABETES MELLITUS TYPE II	endocrine	Yes	Yes	12_044		2001					No										12	Entered	66	Male	02NOV16	281	Placebo	>=250 mg/day	Yes	Yes	>=250 mg/day	No	Yes	Yes	Yes	Yes
Visit 2	2	HYPERTENSION	cardiovascular	Yes	Yes	12_044		2005					No										12	Entered	66	Male	02NOV16	281	Placebo	>=250 mg/day	Yes	Yes	>=250 mg/day	No	Yes	Yes	Yes	Yes
Visit 2	3	OVERWEIGHT	endocrine	Yes	Yes	12_044		2010					No										12	Entered	66	Male	02NOV16	281	Placebo	>=250 mg/day	Yes	Yes	>=250 mg/day	No	Yes	Yes	Yes	Yes
Visit 2	4	DYSLIPIDEMIA	endocrine	Yes	Yes	12_044		2010					No										12	Entered	66	Male	02NOV16	281	Placebo	>=250 mg/day	Yes	Yes	>=250 mg/day	No	Yes	Yes	Yes	Yes
Visit 2	5	GASTROESOPHAGEAL RELFUX DISEASE	gastrointestinal	Yes	Yes	12_044		2013					No										12	Entered	66	Male	02NOV16	281	Placebo	>=250 mg/day	Yes	Yes	>=250 mg/day	No	Yes	Yes	Yes	Yes
Visit 2	6	OSTEOARTHRITIS	musculoskeletal	Yes	Yes	12_044		2006					No										12	Entered	66	Male	02NOV16	281	Placebo	>=250 mg/day	Yes	Yes	>=250 mg/day	No	Yes	Yes	Yes	Yes
Visit 2	7	BILATERAL CATARACT	eyes, ears, nose, throat	Yes		12_044		10UNK2013		06UNK2015			No										12	Entered	66	Male	02NOV16	281	Placebo	>=250 mg/day	Yes	Yes	>=250 mg/day	No	Yes	Yes	Yes	Yes
Visit 2	8	BILATERAL CATARACT SURGERY	surgeries	Yes		12_044		06UNK2015		06UNK2015			No										12	Entered	66	Male	02NOV16	281	Placebo	>=250 mg/day	Yes	Yes	>=250 mg/day	No	Yes	Yes	Yes	Yes
Visit 2	9	BENIGN COLONIC POLYPS	gastrointestinal	Yes		12_044		05UNK2010		05UNK2010			No										12	Entered	66	Male	02NOV16	281	Placebo	>=250 mg/day	Yes	Yes	>=250 mg/day	No	Yes	Yes	Yes	Yes
Visit 2	10	BENIGN COLONIC POLYPECTOMY	surgeries	Yes		12_044		05UNK2010		05UNK2010			No										12	Entered	66	Male	02NOV16	281	Placebo	>=250 mg/day	Yes	Yes	>=250 mg/day	No	Yes	Yes	Yes	Yes
Visit 2	11	LUMBAR SCOLIOSIS	musculoskeletal	Yes	Yes	12_044		2013					No										12	Entered	66	Male	02NOV16	281	Placebo	>=250 mg/day	Yes	Yes	>=250 mg/day	No	Yes	Yes	Yes	Yes
Visit 2	12	PENILE IMPLANT	genital/urinary	Yes	Yes	12_044		05UNK2010					No										12	Entered	66	Male	02NOV16	281	Placebo	>=250 mg/day	Yes	Yes	>=250 mg/day	No	Yes	Yes	Yes	Yes
Visit 2	13	VARICOSE VEINS IN BOTH LEGS	cardiovascular	Yes	Yes	12_044		2013					No										12	Entered	66	Male	02NOV16	281	Placebo	>=250 mg/day	Yes	Yes	>=250 mg/day	No	Yes	Yes	Yes	Yes
Visit 2	14	TRAUMA IN RIGHT HAND	musculoskeletal	Yes		12_044		2007		2007			No										12	Entered	66	Male	02NOV16	281	Placebo	>=250 mg/day	Yes	Yes	>=250 mg/day	No	Yes	Yes	Yes	Yes
Visit 2	15	PARTIAL AMPUTATION OF THE 4TH, 5TH FINGER OF THE RIGHT HAND	surgeries	Yes		12_044		2007		2007			No										12	Entered	66	Male	02NOV16	281	Placebo	>=250 mg/day	Yes	Yes	>=250 mg/day	No	Yes	Yes	Yes	Yes
Visit 2	16	RECONSTRUCTION OF THE 1ST, 3RD FINGER OF THE RIGHT HAND	surgeries	Yes		12_044		2007		2007			No										12	Entered	66	Male	02NOV16	281	Placebo	>=250 mg/day	Yes	Yes	>=250 mg/day	No	Yes	Yes	Yes	Yes
Visit 1	1	DIABETES MELLITUS TYPE II	endocrine	Yes	Yes	12_046		1991				Yes		Yes	No	Yes		No			18OCT16	18OCT2016	12	Entered	75	Male	03NOV16	284	MF4637	>=250 mg/day	Yes	Yes	>=250 mg/day	No	Yes	Yes	Yes	Yes
Visit 1	2	HYPERTENSION	cardiovascular	Yes	Yes	12_046		1991				Yes		Yes	No	Yes		No			18OCT16	18OCT2016	12	Entered	75	Male	03NOV16	284	MF4637	>=250 mg/day	Yes	Yes	>=250 mg/day	No	Yes	Yes	Yes	Yes
Visit 1	3	DYSLIPIDEMIA	endocrine	Yes	Yes	12_046		2011				Yes		Yes	No	Yes		No			18OCT16	18OCT2016	12	Entered	75	Male	03NOV16	284	MF4637	>=250 mg/day	Yes	Yes	>=250 mg/day	No	Yes	Yes	Yes	Yes
Visit 1	4	ALLERGIC RHINITIS	allergies	Yes	Yes	12_046		2015				Yes		Yes	No	Yes		No			18OCT16	18OCT2016	12	Entered	75	Male	03NOV16	284	MF4637	>=250 mg/day	Yes	Yes	>=250 mg/day	No	Yes	Yes	Yes	Yes
Visit 1	5	DIABETIC NEUROPATHY	neurological	Yes	Yes	12_046		2014				Yes		Yes	No	Yes		No			18OCT16	18OCT2016	12	Entered	75	Male	03NOV16	284	MF4637	>=250 mg/day	Yes	Yes	>=250 mg/day	No	Yes	Yes	Yes	Yes
Visit 1	6	OSTEOARTHROSIS	musculoskeletal	Yes	Yes	12_046		2013				Yes		Yes	No	Yes		No			18OCT16	18OCT2016	12	Entered	75	Male	03NOV16	284	MF4637	>=250 mg/day	Yes	Yes	>=250 mg/day	No	Yes	Yes	Yes	Yes
Visit 1	7	OVERWEIGHT	endocrine	Yes	Yes	12_046		2000				Yes		Yes	No	Yes		No			18OCT16	18OCT2016	12	Entered	75	Male	03NOV16	284	MF4637	>=250 mg/day	Yes	Yes	>=250 mg/day	No	Yes	Yes	Yes	Yes
Visit 1	8	PROSTATE CANCER	genital/urinary	Yes		12_046		2005		2005		Yes		Yes	No	Yes		No			18OCT16	18OCT2016	12	Entered	75	Male	03NOV16	284	MF4637	>=250 mg/day	Yes	Yes	>=250 mg/day	No	Yes	Yes	Yes	Yes
Visit 1	9	PARTIAL PROSTATECTOMY	surgeries	Yes		12_046		2005		2005		Yes		Yes	No	Yes		No			18OCT16	18OCT2016	12	Entered	75	Male	03NOV16	284	MF4637	>=250 mg/day	Yes	Yes	>=250 mg/day	No	Yes	Yes	Yes	Yes
Visit 1	10	CHRONIC LOW BACK PAIN	musculoskeletal	Yes	Yes	12_046		2014				Yes		Yes	No	Yes		No			18OCT16	18OCT2016	12	Entered	75	Male	03NOV16	284	MF4637	>=250 mg/day	Yes	Yes	>=250 mg/day	No	Yes	Yes	Yes	Yes
Visit 1	11	GASTROESOPHAGEAL REFLUX DISEASE	gastrointestinal	Yes	Yes	12_046		2015				Yes		Yes	No	Yes		No			18OCT16	18OCT2016	12	Entered	75	Male	03NOV16	284	MF4637	>=250 mg/day	Yes	Yes	>=250 mg/day	No	Yes	Yes	Yes	Yes
Visit 2	1	DIABETES MELLITUS TYPE II	endocrine	Yes	Yes	12_046		1991					No										12	Entered	75	Male	03NOV16	284	MF4637	>=250 mg/day	Yes	Yes	>=250 mg/day	No	Yes	Yes	Yes	Yes
Visit 2	2	HYPERTENSION	cardiovascular	Yes	Yes	12_046		1991					No										12	Entered	75	Male	03NOV16	284	MF4637	>=250 mg/day	Yes	Yes	>=250 mg/day	No	Yes	Yes	Yes	Yes
Visit 2	3	DYSLIPIDEMIA	endocrine	Yes	Yes	12_046		2011					No										12	Entered	75	Male	03NOV16	284	MF4637	>=250 mg/day	Yes	Yes	>=250 mg/day	No	Yes	Yes	Yes	Yes
Visit 2	4	ALLERGIC RHINITIS	allergies	Yes	Yes	12_046		2015					No										12	Entered	75	Male	03NOV16	284	MF4637	>=250 mg/day	Yes	Yes	>=250 mg/day	No	Yes	Yes	Yes	Yes
Visit 2	5	DIABETIC NEUROPATHY	neurological	Yes	Yes	12_046		2014					No										12	Entered	75	Male	03NOV16	284	MF4637	>=250 mg/day	Yes	Yes	>=250 mg/day	No	Yes	Yes	Yes	Yes
Visit 2	6	OSTEOARTHROSIS	musculoskeletal	Yes	Yes	12_046		2013					No										12	Entered	75	Male	03NOV16	284	MF4637	>=250 mg/day	Yes	Yes	>=250 mg/day	No	Yes	Yes	Yes	Yes
Visit 2	7	OVERWEIGHT	endocrine	Yes	Yes	12_046		2000					No										12	Entered	75	Male	03NOV16	284	MF4637	>=250 mg/day	Yes	Yes	>=250 mg/day	No	Yes	Yes	Yes	Yes
Visit 2	8	PROSTATE CANCER	genital/urinary	Yes		12_046		2005		2005			No										12	Entered	75	Male	03NOV16	284	MF4637	>=250 mg/day	Yes	Yes	>=250 mg/day	No	Yes	Yes	Yes	Yes
Visit 2	9	PARTIAL PROSTATECTOMY	surgeries	Yes		12_046		2005		2005			No										12	Entered	75	Male	03NOV16	284	MF4637	>=250 mg/day	Yes	Yes	>=250 mg/day	No	Yes	Yes	Yes	Yes
Visit 2	10	CHRONIC LOW BACK PAIN	musculoskeletal	Yes	Yes	12_046		2014					No										12	Entered	75	Male	03NOV16	284	MF4637	>=250 mg/day	Yes	Yes	>=250 mg/day	No	Yes	Yes	Yes	Yes
Visit 2	11	GASTROESOPHAGEAL REFLUX DISEASE	gastrointestinal	Yes	Yes	12_046		2015					No										12	Entered	75	Male	03NOV16	284	MF4637	>=250 mg/day	Yes	Yes	>=250 mg/day	No	Yes	Yes	Yes	Yes
Visit 1	1	DIABETES MELLITUS TYPE II	endocrine	Yes	Yes	12_047		2012				Yes		Yes	Yes		Ultrasound	No	23DEC15	23DEC2015			12	Screen Failure	46	Male							<250 mg/day	Yes	No	No	No	No
Visit 1	2	HYPERTENSION	cardiovascular	Yes	Yes	12_047		2012				Yes		Yes	Yes		Ultrasound	No	23DEC15	23DEC2015			12	Screen Failure	46	Male							<250 mg/day	Yes	No	No	No	No
Visit 1	3	BILATERAL CARPAL TUNNEL SYNDROME	musculoskeletal	Yes		12_047		2015		2015		Yes		Yes	Yes		Ultrasound	No	23DEC15	23DEC2015			12	Screen Failure	46	Male							<250 mg/day	Yes	No	No	No	No
Visit 1	4	BILATERAL CARPAL TUNNEL SURGERY	surgeries	Yes		12_047		2015		2015		Yes		Yes	Yes		Ultrasound	No	23DEC15	23DEC2015			12	Screen Failure	46	Male							<250 mg/day	Yes	No	No	No	No
Visit 1	5	OBESITY	endocrine	Yes	Yes	12_047		2010				Yes		Yes	Yes		Ultrasound	No	23DEC15	23DEC2015			12	Screen Failure	46	Male							<250 mg/day	Yes	No	No	No	No
Visit 1	6	BACK PAIN	musculoskeletal	Yes	Yes	12_047		2012				Yes		Yes	Yes		Ultrasound	No	23DEC15	23DEC2015			12	Screen Failure	46	Male							<250 mg/day	Yes	No	No	No	No
Visit 1	7	CLAUSTROPHOBIA	psychological	Yes	Yes	12_047	02NOV16	02NOV2016				Yes		Yes	Yes		Ultrasound	No	23DEC15	23DEC2015			12	Screen Failure	46	Male							<250 mg/day	Yes	No	No	No	No
Visit 2	1	DIABETES MELLITUS TYPE II	endocrine	Yes	Yes	12_047		2012					No										12	Screen Failure	46	Male							<250 mg/day	Yes	No	No	No	No
Visit 2	2	HYPERTENSION	cardiovascular	Yes	Yes	12_047		2012					No										12	Screen Failure	46	Male							<250 mg/day	Yes	No	No	No	No
Visit 2	3	BILATERAL CARPAL TUNNEL SYNDROME	musculoskeletal	Yes		12_047		2015		2015			No										12	Screen Failure	46	Male							<250 mg/day	Yes	No	No	No	No
Visit 2	4	BILATERAL CARPAL TUNNEL SURGERY	surgeries	Yes		12_047		2015		2015			No										12	Screen Failure	46	Male							<250 mg/day	Yes	No	No	No	No
Visit 2	5	OBESITY	endocrine	Yes	Yes	12_047		2010					No										12	Screen Failure	46	Male							<250 mg/day	Yes	No	No	No	No
Visit 2	6	BACK PAIN	musculoskeletal	Yes	Yes	12_047		2012					No										12	Screen Failure	46	Male							<250 mg/day	Yes	No	No	No	No
Visit 2	7	CLAUSTROPHOBIA	psychological	Yes	Yes	12_047	02NOV16	02NOV2016					No										12	Screen Failure	46	Male							<250 mg/day	Yes	No	No	No	No
Visit 1	1	DIABETES MELLITUS TYPE II	endocrine	Yes	Yes	12_048		2008				Yes		Yes	No	Yes		No			18OCT16	18OCT2016	12	Entered	63	Female	03NOV16	285	MF4637	<250 mg/day	Yes	No	<250 mg/day	No	Yes	Yes	Yes	Yes
Visit 1	2	HYPERTENSION	cardiovascular	Yes	Yes	12_048		2013				Yes		Yes	No	Yes		No			18OCT16	18OCT2016	12	Entered	63	Female	03NOV16	285	MF4637	<250 mg/day	Yes	No	<250 mg/day	No	Yes	Yes	Yes	Yes
Visit 1	3	DYSLIPIDEMIA	endocrine	Yes	Yes	12_048		2016				Yes		Yes	No	Yes		No			18OCT16	18OCT2016	12	Entered	63	Female	03NOV16	285	MF4637	<250 mg/day	Yes	No	<250 mg/day	No	Yes	Yes	Yes	Yes
Visit 1	4	DEPRESSION	psychological	Yes	Yes	12_048		2004				Yes		Yes	No	Yes		No			18OCT16	18OCT2016	12	Entered	63	Female	03NOV16	285	MF4637	<250 mg/day	Yes	No	<250 mg/day	No	Yes	Yes	Yes	Yes
Visit 1	5	ANXIETY	psychological	Yes	Yes	12_048		2004				Yes		Yes	No	Yes		No			18OCT16	18OCT2016	12	Entered	63	Female	03NOV16	285	MF4637	<250 mg/day	Yes	No	<250 mg/day	No	Yes	Yes	Yes	Yes
Visit 1	6	INSOMNIA	psychological	Yes	Yes	12_048		2004				Yes		Yes	No	Yes		No			18OCT16	18OCT2016	12	Entered	63	Female	03NOV16	285	MF4637	<250 mg/day	Yes	No	<250 mg/day	No	Yes	Yes	Yes	Yes
Visit 1	7	OSTEOARTHROSIS	musculoskeletal	Yes	Yes	12_048		2008				Yes		Yes	No	Yes		No			18OCT16	18OCT2016	12	Entered	63	Female	03NOV16	285	MF4637	<250 mg/day	Yes	No	<250 mg/day	No	Yes	Yes	Yes	Yes
Visit 1	8	POSTMENOPAUSAL	genital/urinary	Yes	Yes	12_048		2006				Yes		Yes	No	Yes		No			18OCT16	18OCT2016	12	Entered	63	Female	03NOV16	285	MF4637	<250 mg/day	Yes	No	<250 mg/day	No	Yes	Yes	Yes	Yes
Visit 1	9	TOTAL HYSTERECTOMY	surgeries	Yes		12_048		2006		2006		Yes		Yes	No	Yes		No			18OCT16	18OCT2016	12	Entered	63	Female	03NOV16	285	MF4637	<250 mg/day	Yes	No	<250 mg/day	No	Yes	Yes	Yes	Yes
Visit 1	10	UTERINE FIBROID	genital/urinary	Yes		12_048		2004		2004		Yes		Yes	No	Yes		No			18OCT16	18OCT2016	12	Entered	63	Female	03NOV16	285	MF4637	<250 mg/day	Yes	No	<250 mg/day	No	Yes	Yes	Yes	Yes
Visit 1	11	CHOLECYSTITIS	gastrointestinal	Yes		12_048		1997		1997		Yes		Yes	No	Yes		No			18OCT16	18OCT2016	12	Entered	63	Female	03NOV16	285	MF4637	<250 mg/day	Yes	No	<250 mg/day	No	Yes	Yes	Yes	Yes
Visit 1	12	CHOLECYSTECTOMY	surgeries	Yes		12_048		1997		1997		Yes		Yes	No	Yes		No			18OCT16	18OCT2016	12	Entered	63	Female	03NOV16	285	MF4637	<250 mg/day	Yes	No	<250 mg/day	No	Yes	Yes	Yes	Yes
Visit 1	13	CHRONIC CERVICAL PAIN	musculoskeletal	Yes	Yes	12_048		2013				Yes		Yes	No	Yes		No			18OCT16	18OCT2016	12	Entered	63	Female	03NOV16	285	MF4637	<250 mg/day	Yes	No	<250 mg/day	No	Yes	Yes	Yes	Yes
Visit 1	14	GASTROESOPHAGEAL REFLUX DISEASE	gastrointestinal	Yes	Yes	12_048		2013				Yes		Yes	No	Yes		No			18OCT16	18OCT2016	12	Entered	63	Female	03NOV16	285	MF4637	<250 mg/day	Yes	No	<250 mg/day	No	Yes	Yes	Yes	Yes
Visit 1	15	MEMORY LOSS	neurological	Yes	Yes	12_048		2015				Yes		Yes	No	Yes		No			18OCT16	18OCT2016	12	Entered	63	Female	03NOV16	285	MF4637	<250 mg/day	Yes	No	<250 mg/day	No	Yes	Yes	Yes	Yes
Visit 1	16	OVERWEIGHT	endocrine	Yes	Yes	12_048		2008				Yes		Yes	No	Yes		No			18OCT16	18OCT2016	12	Entered	63	Female	03NOV16	285	MF4637	<250 mg/day	Yes	No	<250 mg/day	No	Yes	Yes	Yes	Yes
Visit 1	17	CONSTIPATION	gastrointestinal	Yes	Yes	12_048	27MAY16	27MAY2016				Yes		Yes	No	Yes		No			18OCT16	18OCT2016	12	Entered	63	Female	03NOV16	285	MF4637	<250 mg/day	Yes	No	<250 mg/day	No	Yes	Yes	Yes	Yes
Visit 1	18	DEGENERATIVE JOINT DISEASE CERVICAL SPINE	musculoskeletal	Yes	Yes	12_048	27MAY16	27MAY2016				Yes		Yes	No	Yes		No			18OCT16	18OCT2016	12	Entered	63	Female	03NOV16	285	MF4637	<250 mg/day	Yes	No	<250 mg/day	No	Yes	Yes	Yes	Yes
Visit 1	19	BACK PAIN	musculoskeletal	Yes	Yes	12_048		2006				Yes		Yes	No	Yes		No			18OCT16	18OCT2016	12	Entered	63	Female	03NOV16	285	MF4637	<250 mg/day	Yes	No	<250 mg/day	No	Yes	Yes	Yes	Yes
Visit 1	20	OSTEOPOROSIS	musculoskeletal	Yes	Yes	12_048		2016				Yes		Yes	No	Yes		No			18OCT16	18OCT2016	12	Entered	63	Female	03NOV16	285	MF4637	<250 mg/day	Yes	No	<250 mg/day	No	Yes	Yes	Yes	Yes
Visit 1	21	ATROPHIC VAGINITIS	genital/urinary	Yes	Yes	12_048		2016				Yes		Yes	No	Yes		No			18OCT16	18OCT2016	12	Entered	63	Female	03NOV16	285	MF4637	<250 mg/day	Yes	No	<250 mg/day	No	Yes	Yes	Yes	Yes
Visit 1	22	FACE CELLULITIS	dermatological	Yes	Yes	12_048	11JUL16	11JUL2016				Yes		Yes	No	Yes		No			18OCT16	18OCT2016	12	Entered	63	Female	03NOV16	285	MF4637	<250 mg/day	Yes	No	<250 mg/day	No	Yes	Yes	Yes	Yes
Visit 1	23	ONYCHOMYCOSIS	dermatological	Yes	Yes	12_048	24AUG16	24AUG2016				Yes		Yes	No	Yes		No			18OCT16	18OCT2016	12	Entered	63	Female	03NOV16	285	MF4637	<250 mg/day	Yes	No	<250 mg/day	No	Yes	Yes	Yes	Yes
Visit 1	24	ABDOMINOPLASTY	surgeries	Yes		12_048		2012		2012		Yes		Yes	No	Yes		No			18OCT16	18OCT2016	12	Entered	63	Female	03NOV16	285	MF4637	<250 mg/day	Yes	No	<250 mg/day	No	Yes	Yes	Yes	Yes
Visit 2	1	DIABETES MELLITUS TYPE II	endocrine	Yes	Yes	12_048		2008					No										12	Entered	63	Female	03NOV16	285	MF4637	<250 mg/day	Yes	No	<250 mg/day	No	Yes	Yes	Yes	Yes
Visit 2	2	HYPERTENSION	cardiovascular	Yes	Yes	12_048		2013					No										12	Entered	63	Female	03NOV16	285	MF4637	<250 mg/day	Yes	No	<250 mg/day	No	Yes	Yes	Yes	Yes
Visit 2	3	DYSLIPIDEMIA	endocrine	Yes	Yes	12_048		2016					No										12	Entered	63	Female	03NOV16	285	MF4637	<250 mg/day	Yes	No	<250 mg/day	No	Yes	Yes	Yes	Yes
Visit 2	4	DEPRESSION	psychological	Yes	Yes	12_048		2004					No										12	Entered	63	Female	03NOV16	285	MF4637	<250 mg/day	Yes	No	<250 mg/day	No	Yes	Yes	Yes	Yes
Visit 2	5	ANXIETY	psychological	Yes	Yes	12_048		2004					No										12	Entered	63	Female	03NOV16	285	MF4637	<250 mg/day	Yes	No	<250 mg/day	No	Yes	Yes	Yes	Yes
Visit 2	6	INSOMNIA	psychological	Yes	Yes	12_048		2004					No										12	Entered	63	Female	03NOV16	285	MF4637	<250 mg/day	Yes	No	<250 mg/day	No	Yes	Yes	Yes	Yes
Visit 2	7	OSTEOARTHROSIS	musculoskeletal	Yes	Yes	12_048		2008					No										12	Entered	63	Female	03NOV16	285	MF4637	<250 mg/day	Yes	No	<250 mg/day	No	Yes	Yes	Yes	Yes
Visit 2	8	POSTMENOPAUSAL	genital/urinary	Yes	Yes	12_048		2006					No										12	Entered	63	Female	03NOV16	285	MF4637	<250 mg/day	Yes	No	<250 mg/day	No	Yes	Yes	Yes	Yes
Visit 2	9	TOTAL HYSTERECTOMY	surgeries	Yes		12_048		2006		2006			No										12	Entered	63	Female	03NOV16	285	MF4637	<250 mg/day	Yes	No	<250 mg/day	No	Yes	Yes	Yes	Yes
Visit 2	10	UTERINE FIBROID	genital/urinary	Yes		12_048		2004		2004			No										12	Entered	63	Female	03NOV16	285	MF4637	<250 mg/day	Yes	No	<250 mg/day	No	Yes	Yes	Yes	Yes
Visit 2	11	CHOLECYSTITIS	gastrointestinal	Yes		12_048		1997		1997			No										12	Entered	63	Female	03NOV16	285	MF4637	<250 mg/day	Yes	No	<250 mg/day	No	Yes	Yes	Yes	Yes
Visit 2	12	CHOLECYSTECTOMY	surgeries	Yes		12_048		1997		1997			No										12	Entered	63	Female	03NOV16	285	MF4637	<250 mg/day	Yes	No	<250 mg/day	No	Yes	Yes	Yes	Yes
Visit 2	13	CHRONIC CERVICAL PAIN	musculoskeletal	Yes	Yes	12_048		2013					No										12	Entered	63	Female	03NOV16	285	MF4637	<250 mg/day	Yes	No	<250 mg/day	No	Yes	Yes	Yes	Yes
Visit 2	14	GASTROESOPHAGEAL REFLUX DISEASE	gastrointestinal	Yes	Yes	12_048		2013					No										12	Entered	63	Female	03NOV16	285	MF4637	<250 mg/day	Yes	No	<250 mg/day	No	Yes	Yes	Yes	Yes
Visit 2	15	MEMORY LOSS	neurological	Yes	Yes	12_048		2015					No										12	Entered	63	Female	03NOV16	285	MF4637	<250 mg/day	Yes	No	<250 mg/day	No	Yes	Yes	Yes	Yes
Visit 2	16	OVERWEIGHT	endocrine	Yes	Yes	12_048		2008					No										12	Entered	63	Female	03NOV16	285	MF4637	<250 mg/day	Yes	No	<250 mg/day	No	Yes	Yes	Yes	Yes
Visit 2	17	CONSTIPATION	gastrointestinal	Yes	Yes	12_048	27MAY16	27MAY2016					No										12	Entered	63	Female	03NOV16	285	MF4637	<250 mg/day	Yes	No	<250 mg/day	No	Yes	Yes	Yes	Yes
Visit 2	18	DEGENERATIVE JOINT DISEASE CERVICAL SPINE	musculoskeletal	Yes	Yes	12_048	27MAY16	27MAY2016					No										12	Entered	63	Female	03NOV16	285	MF4637	<250 mg/day	Yes	No	<250 mg/day	No	Yes	Yes	Yes	Yes
Visit 2	19	BACK PAIN	musculoskeletal	Yes	Yes	12_048		2006					No										12	Entered	63	Female	03NOV16	285	MF4637	<250 mg/day	Yes	No	<250 mg/day	No	Yes	Yes	Yes	Yes
Visit 1	1	HYPERTENSION	cardiovascular	Yes	Yes	12_054		2009				Yes		Yes	No	Yes		No			21OCT16	21OCT2016	12	Entered	60	Female	03NOV16	286	Placebo	>=250 mg/day	Yes	Yes	>=250 mg/day	No	Yes	Yes	Yes	Yes
Visit 1	2	DEPRESSION	psychological	Yes	Yes	12_054		2009				Yes		Yes	No	Yes		No			21OCT16	21OCT2016	12	Entered	60	Female	03NOV16	286	Placebo	>=250 mg/day	Yes	Yes	>=250 mg/day	No	Yes	Yes	Yes	Yes
Visit 1	3	DIABETES MELLITUS TYPE II	endocrine	Yes	Yes	12_054		2009				Yes		Yes	No	Yes		No			21OCT16	21OCT2016	12	Entered	60	Female	03NOV16	286	Placebo	>=250 mg/day	Yes	Yes	>=250 mg/day	No	Yes	Yes	Yes	Yes
Visit 1	4	MEMORY LOSS	neurological	Yes	Yes	12_054		2014				Yes		Yes	No	Yes		No			21OCT16	21OCT2016	12	Entered	60	Female	03NOV16	286	Placebo	>=250 mg/day	Yes	Yes	>=250 mg/day	No	Yes	Yes	Yes	Yes
Visit 1	5	DIABETIC NEUROPATHY	neurological	Yes	Yes	12_054		2012				Yes		Yes	No	Yes		No			21OCT16	21OCT2016	12	Entered	60	Female	03NOV16	286	Placebo	>=250 mg/day	Yes	Yes	>=250 mg/day	No	Yes	Yes	Yes	Yes
Visit 1	6	ANXIETY	psychological	Yes	Yes	12_054		2009				Yes		Yes	No	Yes		No			21OCT16	21OCT2016	12	Entered	60	Female	03NOV16	286	Placebo	>=250 mg/day	Yes	Yes	>=250 mg/day	No	Yes	Yes	Yes	Yes
Visit 1	7	DYSLIPIDEMIA	endocrine	Yes	Yes	12_054		2009				Yes		Yes	No	Yes		No			21OCT16	21OCT2016	12	Entered	60	Female	03NOV16	286	Placebo	>=250 mg/day	Yes	Yes	>=250 mg/day	No	Yes	Yes	Yes	Yes
Visit 1	8	GASTROESOPHAGEAL REFLUX DISEASE	gastrointestinal	Yes	Yes	12_054		2009				Yes		Yes	No	Yes		No			21OCT16	21OCT2016	12	Entered	60	Female	03NOV16	286	Placebo	>=250 mg/day	Yes	Yes	>=250 mg/day	No	Yes	Yes	Yes	Yes
Visit 1	9	INSOMNIA	psychological	Yes	Yes	12_054		2000				Yes		Yes	No	Yes		No			21OCT16	21OCT2016	12	Entered	60	Female	03NOV16	286	Placebo	>=250 mg/day	Yes	Yes	>=250 mg/day	No	Yes	Yes	Yes	Yes
Visit 1	10	HEMORRHOIDS	gastrointestinal	Yes	Yes	12_054		2010				Yes		Yes	No	Yes		No			21OCT16	21OCT2016	12	Entered	60	Female	03NOV16	286	Placebo	>=250 mg/day	Yes	Yes	>=250 mg/day	No	Yes	Yes	Yes	Yes
Visit 1	11	OSTEOARTHROSIS	musculoskeletal	Yes	Yes	12_054		2009				Yes		Yes	No	Yes		No			21OCT16	21OCT2016	12	Entered	60	Female	03NOV16	286	Placebo	>=250 mg/day	Yes	Yes	>=250 mg/day	No	Yes	Yes	Yes	Yes
Visit 1	12	OBESITY	endocrine	Yes	Yes	12_054		2012				Yes		Yes	No	Yes		No			21OCT16	21OCT2016	12	Entered	60	Female	03NOV16	286	Placebo	>=250 mg/day	Yes	Yes	>=250 mg/day	No	Yes	Yes	Yes	Yes
Visit 1	13	URINARY INCONTINENCE	genital/urinary	Yes	Yes	12_054		2012				Yes		Yes	No	Yes		No			21OCT16	21OCT2016	12	Entered	60	Female	03NOV16	286	Placebo	>=250 mg/day	Yes	Yes	>=250 mg/day	No	Yes	Yes	Yes	Yes
Visit 1	14	VITAMIN D DEFICIENCY	endocrine	Yes	Yes	12_054		2015				Yes		Yes	No	Yes		No			21OCT16	21OCT2016	12	Entered	60	Female	03NOV16	286	Placebo	>=250 mg/day	Yes	Yes	>=250 mg/day	No	Yes	Yes	Yes	Yes
Visit 1	15	SULFA ALLERGY	allergies	Yes	Yes	12_054		1965				Yes		Yes	No	Yes		No			21OCT16	21OCT2016	12	Entered	60	Female	03NOV16	286	Placebo	>=250 mg/day	Yes	Yes	>=250 mg/day	No	Yes	Yes	Yes	Yes
Visit 1	16	BENIGN RIGHT BREAST NODULE	dermatological	Yes	Yes	12_054		DEC2015				Yes		Yes	No	Yes		No			21OCT16	21OCT2016	12	Entered	60	Female	03NOV16	286	Placebo	>=250 mg/day	Yes	Yes	>=250 mg/day	No	Yes	Yes	Yes	Yes
Visit 1	17	POSTMENOPAUSAL	genital/urinary	Yes	Yes	12_054		2009				Yes		Yes	No	Yes		No			21OCT16	21OCT2016	12	Entered	60	Female	03NOV16	286	Placebo	>=250 mg/day	Yes	Yes	>=250 mg/day	No	Yes	Yes	Yes	Yes
Visit 1	18	BIPOLAR DISORDER	psychological	Yes	Yes	12_054		2009				Yes		Yes	No	Yes		No			21OCT16	21OCT2016	12	Entered	60	Female	03NOV16	286	Placebo	>=250 mg/day	Yes	Yes	>=250 mg/day	No	Yes	Yes	Yes	Yes
Visit 1	19	BILATERAL TUBAL LIGATION	surgeries	Yes		12_054		1983		1983		Yes		Yes	No	Yes		No			21OCT16	21OCT2016	12	Entered	60	Female	03NOV16	286	Placebo	>=250 mg/day	Yes	Yes	>=250 mg/day	No	Yes	Yes	Yes	Yes
Visit 2	1	HYPERTENSION	cardiovascular	Yes	Yes	12_054		2009					No										12	Entered	60	Female	03NOV16	286	Placebo	>=250 mg/day	Yes	Yes	>=250 mg/day	No	Yes	Yes	Yes	Yes
Visit 2	2	DEPRESSION	psychological	Yes	Yes	12_054		2009					No										12	Entered	60	Female	03NOV16	286	Placebo	>=250 mg/day	Yes	Yes	>=250 mg/day	No	Yes	Yes	Yes	Yes
Visit 2	3	DIABETES MELLITUS TYPE II	endocrine	Yes	Yes	12_054		2009					No										12	Entered	60	Female	03NOV16	286	Placebo	>=250 mg/day	Yes	Yes	>=250 mg/day	No	Yes	Yes	Yes	Yes
Visit 2	4	MEMORY LOSS	neurological	Yes	Yes	12_054		2014					No										12	Entered	60	Female	03NOV16	286	Placebo	>=250 mg/day	Yes	Yes	>=250 mg/day	No	Yes	Yes	Yes	Yes
Visit 2	5	DIABETIC NEUROPATHY	neurological	Yes	Yes	12_054		2012					No										12	Entered	60	Female	03NOV16	286	Placebo	>=250 mg/day	Yes	Yes	>=250 mg/day	No	Yes	Yes	Yes	Yes
Visit 2	6	ANXIETY	psychological	Yes	Yes	12_054		2009					No										12	Entered	60	Female	03NOV16	286	Placebo	>=250 mg/day	Yes	Yes	>=250 mg/day	No	Yes	Yes	Yes	Yes
Visit 2	7	DYSLIPIDEMIA	endocrine	Yes	Yes	12_054		2009					No										12	Entered	60	Female	03NOV16	286	Placebo	>=250 mg/day	Yes	Yes	>=250 mg/day	No	Yes	Yes	Yes	Yes
Visit 2	8	GASTROESOPHAGEAL REFLUX DISEASE	gastrointestinal	Yes	Yes	12_054		2009					No										12	Entered	60	Female	03NOV16	286	Placebo	>=250 mg/day	Yes	Yes	>=250 mg/day	No	Yes	Yes	Yes	Yes
Visit 2	9	INSOMNIA	psychological	Yes	Yes	12_054		2000					No										12	Entered	60	Female	03NOV16	286	Placebo	>=250 mg/day	Yes	Yes	>=250 mg/day	No	Yes	Yes	Yes	Yes
Visit 2	10	HEMORRHOIDS	gastrointestinal	Yes	Yes	12_054		2010					No										12	Entered	60	Female	03NOV16	286	Placebo	>=250 mg/day	Yes	Yes	>=250 mg/day	No	Yes	Yes	Yes	Yes
Visit 2	11	OSTEOARTHROSIS	musculoskeletal	Yes	Yes	12_054		2009					No										12	Entered	60	Female	03NOV16	286	Placebo	>=250 mg/day	Yes	Yes	>=250 mg/day	No	Yes	Yes	Yes	Yes
Visit 2	12	OBESITY	endocrine	Yes	Yes	12_054		2012					No										12	Entered	60	Female	03NOV16	286	Placebo	>=250 mg/day	Yes	Yes	>=250 mg/day	No	Yes	Yes	Yes	Yes
Visit 2	13	URINARY INCONTINENCE	genital/urinary	Yes	Yes	12_054		2012					No										12	Entered	60	Female	03NOV16	286	Placebo	>=250 mg/day	Yes	Yes	>=250 mg/day	No	Yes	Yes	Yes	Yes
Visit 2	14	VITAMIN D DEFICIENCY	endocrine	Yes	Yes	12_054		2015					No										12	Entered	60	Female	03NOV16	286	Placebo	>=250 mg/day	Yes	Yes	>=250 mg/day	No	Yes	Yes	Yes	Yes
Visit 2	15	SULFA ALLERGY	allergies	Yes	Yes	12_054		1965					No										12	Entered	60	Female	03NOV16	286	Placebo	>=250 mg/day	Yes	Yes	>=250 mg/day	No	Yes	Yes	Yes	Yes
Visit 2	16	BENIGN RIGHT BREAST NODULE	dermatological	Yes	Yes	12_054		DEC2015					No										12	Entered	60	Female	03NOV16	286	Placebo	>=250 mg/day	Yes	Yes	>=250 mg/day	No	Yes	Yes	Yes	Yes
Visit 2	17	POSTMENOPAUSAL	genital/urinary	Yes	Yes	12_054		2009					No										12	Entered	60	Female	03NOV16	286	Placebo	>=250 mg/day	Yes	Yes	>=250 mg/day	No	Yes	Yes	Yes	Yes
Visit 2	18	BIPOLAR DISORDER	psychological	Yes	Yes	12_054		2009					No										12	Entered	60	Female	03NOV16	286	Placebo	>=250 mg/day	Yes	Yes	>=250 mg/day	No	Yes	Yes	Yes	Yes
Visit 2	19	BILATERAL TUBAL LIGATION	surgeries	Yes		12_054		1983		1983			No										12	Entered	60	Female	03NOV16	286	Placebo	>=250 mg/day	Yes	Yes	>=250 mg/day	No	Yes	Yes	Yes	Yes
Visit 1	1	HYPERTENSION	cardiovascular	Yes	Yes	12_056		1980				Yes		Yes	No	Yes		No			21OCT16	21OCT2016	12	Early Termination	61	Male	03NOV16	287	Placebo	<250 mg/day	Yes	Yes	<250 mg/day	No	Yes	Yes	Yes	Yes
Visit 1	2	DIABETES MELLITUS TYPE II	endocrine	Yes	Yes	12_056		2014				Yes		Yes	No	Yes		No			21OCT16	21OCT2016	12	Early Termination	61	Male	03NOV16	287	Placebo	<250 mg/day	Yes	Yes	<250 mg/day	No	Yes	Yes	Yes	Yes
[truncated: 789 more rows]
