# Supplementary material for: Evaluation of a High Concentrate Omega-3 for Correcting the Omega-3 Fatty Acid Nutritional Deficiency in Non-alcoholic Fatty Liver Disease and effects on Hepatic Steatosis (CONDIN)
Source: Preprints.org preprint supplement (doi:10.20944/preprints201807.0240.v1), 2018-07-13
Supplement: Supplementary file 12 [file MRI.xlsx]

## Sheet: MRI
VISIT	MRI_PROT	MRI_REAS	MRI_YN	SUBJID	MRIDT	CDMRI	MRISHDT	CDMRISH	VISITNUM	COM1A	HFF	FLI	B_HFF	B_FLI	D_HFF	D_FLI	SITE	STATUS	AGE	SEX	FIRSTDT	RANDNO	TREAT	OMEGA	DIABETE	STATIN	OMEGA_C	SFFL	SAFETY	ITT	MITT	PP
Visit 2	3T		Yes	04_018	02AUG16	02AUG2016	03AUG16	03AUG2016	Baseline		4.6	11.7555	4.6	11.7555			04	Early Termination	37	Male		197	MF4637	<250 mg/day	No	No	<250 mg/day	No	No	Yes	No	No
Visit 2	3T		Yes	04_019	02AUG16	02AUG2016	03AUG16	03AUG2016	Baseline		16.1	4.47315	16.1	4.47315			04	Early Termination	50	Female		200	Placebo	<250 mg/day	No	No	<250 mg/day	No	No	Yes	No	No
Visit 2	3T		Yes	04_020	28JUL16	28JUL2016	29JUL16	29JUL2016	Baseline		19	35.6837	19	35.6837			04	Entered	44	Male	28JUL16	196	MF4637	<250 mg/day	Yes	No	<250 mg/day	No	Yes	Yes	Yes	Yes
Visit 5		Uncontrollable claustrophobia	No	04_020					Week 24			36.7349	19	35.6837		1.05124	04	Entered	44	Male	28JUL16	196	MF4637	<250 mg/day	Yes	No	<250 mg/day	No	Yes	Yes	Yes	Yes
Visit 2		Physically cannot fit into the machine	No	04_021					Baseline								04	Screen Failure	50	Male							<250 mg/day	Yes	No	No	No	No
Visit 2	3T		Yes	04_022	28JUL16	28JUL2016	29JUL16	29JUL2016	Baseline	COMPLETE ANATOMIC COVERAGE PRESENT.SLIGHT BREATHING AND MOVEMENT ARTIFACTS NOTED. SCAN TECHNICAL QUALITY ACCEPTABLE.	14.9	17.5464	14.9	17.5464			04	Entered	44	Female	28JUL16	199	Placebo	>=250 mg/day	No	No	>=250 mg/day	No	Yes	Yes	Yes	Yes
Visit 5			No	04_022					Week 24			10.8162	14.9	17.5464		-6.73022	04	Entered	44	Female	28JUL16	199	Placebo	>=250 mg/day	No	No	>=250 mg/day	No	Yes	Yes	Yes	Yes
Visit 2	3T		Yes	04_023	15AUG16	15AUG2016	15AUG16	15AUG2016	Baseline	COMPLETE ANATOMIC COVERAGE PRESENT. MODERATE BREATHING AND MOVEMENT ARTIFACTS NOTED.	8.4	22.893	8.4	22.893			04	Entered	56	Male	17AUG16	202	MF4637	>=250 mg/day	No	No	>=250 mg/day	No	Yes	Yes	Yes	Yes
Visit 5	3T		Yes	04_023	08FEB17	08FEB2017	08FEB17	08FEB2017	Week 24	COMPLETE ANATOMIC COVERAGE PRESENT.SLIGHT BREATHING AND MOVEMENT ARTIFACTS NOTED. SCAN TECHNICAL QUALITY ACCEPTABLE.	6.8	31.6118	8.4	22.893	-1.6	8.71883	04	Entered	56	Male	17AUG16	202	MF4637	>=250 mg/day	No	No	>=250 mg/day	No	Yes	Yes	Yes	Yes
Visit 2	3T		Yes	04_025	03AUG16	03AUG2016	04AUG16	04AUG2016	Baseline	COMPLETE ANATOMIC COVERAGE PRESENT. BREATHING AND MOVEMENT ARTIFACTS NOTED. POSSIBLE LARGE AREA OF FOCAL FATTY INFILTRATION IN THE RIGHT LOBE NOTED.	18.6	31.7082	18.6	31.7082			04	Entered	49	Male	25AUG16	203	MF4637	<250 mg/day	No	No	<250 mg/day	No	Yes	Yes	Yes	Yes
Visit 5		Uncontrollable claustrophobia	No	04_025					Week 24			13.2507	18.6	31.7082		-18.4575	04	Entered	49	Male	25AUG16	203	MF4637	<250 mg/day	No	No	<250 mg/day	No	Yes	Yes	Yes	Yes
Visit 2		Uncontrollable claustrophobia	No	04_026					Baseline								04	Screen Failure	36	Male							>=250 mg/day	Yes	No	No	No	No
Visit 2	3T		Yes	04_027	24AUG16	24AUG2016	25AUG16	25AUG2016	Baseline	COMPLETE ANATOMIC COVERAGE PRESENT. SLIGHT BREATHING AND MOVEMENT ARTIFACTS NOTED. SCAN TECHNICAL QUALITY ACCEPTABLE.	6.2	2.83592	6.2	2.83592			04	Early Termination	39	Female		201	Placebo	>=250 mg/day	No	No	>=250 mg/day	No	No	Yes	No	No
Visit 2	3T		Yes	04_030	15SEP16	15SEP2016	15SEP16	15SEP2016	Baseline	COMPLETE ANATOMIC COVERAGE PRESENT.SLIGHT BREATHING AND MOVEMENT ARTIFACTS NOTED. SCAN TECHNICAL QUALITY ACCEPTABLE.	11.2	12.1482	11.2	12.1482			04	Entered	67	Female	15SEP16	216	MF4637	>=250 mg/day	Yes	No	>=250 mg/day	No	Yes	Yes	Yes	Yes
				04_030					Week 24		8.7	8.94073	11.2	12.1482	-2.5	-3.20743	04	Entered	67	Female	15SEP16	216	MF4637	>=250 mg/day	Yes	No	>=250 mg/day	No	Yes	Yes	Yes	Yes
Visit 2	3T		Yes	04_031	20SEP16	20SEP2016	21SEP16	21SEP2016	Baseline	COMPLETE ANATOMIC COVERAGE PRESENT.SLIGHT BREATHING AND MOVEMENT ARTIFACTS NOTED. SCAN TECHNICAL QUALITY ACCEPTABLE.	20.6	49.2392	20.6	49.2392			04	Entered	56	Male	22SEP16	217	Placebo	<250 mg/day	Yes	No	<250 mg/day	No	Yes	Yes	Yes	Yes
Visit 5	3T		Yes	04_031	18MAR17	18MAR2017	20MAR17	20MAR2017	Week 24		15.8	45.8406	20.6	49.2392	-4.8	-3.39865	04	Entered	56	Male	22SEP16	217	Placebo	<250 mg/day	Yes	No	<250 mg/day	No	Yes	Yes	Yes	Yes
Visit 2	3T		Yes	04_032	22SEP16	22SEP2016	22SEP16	22SEP2016	Baseline	COMPLETE ANATOMIC COVERAGE PRESENT. MILD BREATHING AND MOTION ARTIFACTS NOTED.	10.2	20.6631	10.2	20.6631			04	Early Termination	53	Female	22SEP16	218	MF4637	<250 mg/day	No	No	<250 mg/day	No	Yes	Yes	No	No
Visit 2	1.5 Tesla (T)		Yes	04_035	07OCT16	07OCT2016	07OCT16	07OCT2016	Baseline	COMPLETE ANATOMIC COVERAGE PRESENT. MILD BREATHING AND MOTION ARTIFACTS NOTED.	12.2	21.7621	12.2	21.7621			04	Entered	59	Female	10OCT16	219	Placebo	>=250 mg/day	No	No	>=250 mg/day	No	Yes	Yes	Yes	Yes
Visit 5	3T		Yes	04_035	01APR17	01APR2017	01APR17	01APR2017	Week 24	COMPLETE ANATOMIC COVERAGE PRESENT. MODERATE BREATHING AND MOTION ARTIFACTS NOTED.	11.6	17.2804	12.2	21.7621	-0.6	-4.48166	04	Entered	59	Female	10OCT16	219	Placebo	>=250 mg/day	No	No	>=250 mg/day	No	Yes	Yes	Yes	Yes
Visit 2	1.5 Tesla (T)		Yes	09_015	27SEP16	27SEP2016	22SEP16	22SEP2016	Baseline		4.6	9.90022	4.6	9.90022			09	Entered	72	Male	04OCT16	167	MF4637	>=250 mg/day	Yes	No	<250 mg/day	No	Yes	Yes	Yes	Yes
Visit 5	1.5 Tesla (T)		Yes	09_015	23MAR17	23MAR2017	23MAR17	23MAR2017	Week 24		4.9	9.91199	4.6	9.90022	0.3	0.0117715	09	Entered	72	Male	04OCT16	167	MF4637	>=250 mg/day	Yes	No	<250 mg/day	No	Yes	Yes	Yes	Yes
Visit 2	1.5 Tesla (T)		Yes	09_018	21OCT16	21OCT2016	21OCT16	21OCT2016	Baseline	COMPLETE ANATOMIC COVERAGE PRESENT. MILD TO MODERATE BREATHING AND MOTION ARTIFACTS NOTED.	24.5	48.4332	24.5	48.4332			09	Entered	73	Male	14NOV16	105	Placebo	>=250 mg/day	Yes	No	>=250 mg/day	No	Yes	Yes	Yes	Yes
Visit 5	1.5 Tesla (T)		Yes	09_018	25APR17	25APR2017	25APR17	25APR2017	Week 24	COMPLETE ANATOMIC COVERAGE PRESENT. MILD BREATHING AND MOTION ARTIFACTS NOTED.	20.1	35.8011	24.5	48.4332	-4.4	-12.6321	09	Entered	73	Male	14NOV16	105	Placebo	>=250 mg/day	Yes	No	>=250 mg/day	No	Yes	Yes	Yes	Yes
Visit 2	1.5 Tesla (T)		Yes	09_020	10SEP16	10SEP2016	10SEP16	10SEP2016	Baseline	COMPLETE ANATOMIC COVERAGE PRESENT. MILD BREATHING AND MOTION ARTIFACTS NOTED.	6.3	16.034	6.3	16.034			09	Entered	53	Female	14OCT16	169	MF4637	>=250 mg/day	Yes	No	<250 mg/day	No	Yes	Yes	Yes	Yes
Visit 5	1.5 Tesla (T)		Yes	09_020	22MAR17	22MAR2017	22MAR17	22MAR2017	Week 24	COMPLETE ANATOMIC COVERAGE PRESENT. MILD BREATHING AND MOTION ARTIFACTS NOTED.	10.1	22.3305	6.3	16.034	3.8	6.2965	09	Entered	53	Female	14OCT16	169	MF4637	>=250 mg/day	Yes	No	<250 mg/day	No	Yes	Yes	Yes	Yes
Visit 2	1.5 Tesla (T)		Yes	09_021	17SEP16	17SEP2016	17SEP16	17SEP2016	Baseline	COMPLETE ANATOMIC COVERAGE PRESENT. MILD TO MODERATE BREATHING AND MOTION ARTIFACTS NOTED.	3.4	31.8379	3.4	31.8379			09	Entered	54	Male	27OCT16	104	MF4637	>=250 mg/day	No	No	<250 mg/day	No	Yes	Yes	Yes	Yes
Visit 5	1.5 Tesla (T)		Yes	09_021	14APR17	14APR2017	14APR17	14APR2017	Week 24	COMPLETE ANATOMIC COVERAGE PRESENT. MILD TO MODERATE BREATHING AND MOTION ARTIFACTS NOTED.	4.2	24.7905	3.4	31.8379	0.8	-7.04736	09	Entered	54	Male	27OCT16	104	MF4637	>=250 mg/day	No	No	<250 mg/day	No	Yes	Yes	Yes	Yes
Visit 2	1.5 Tesla (T)		Yes	09_024	26SEP16	26SEP2016	26SEP16	26SEP2016	Baseline	COMPLETE ANATOMIC COVERAGE PRESENT. MILD TO MODERATE BREATHING AND MOTION ARTIFACTS NOTED.	17.2		17.2				09	Entered	47	Male	04OCT16	168	Placebo	>=250 mg/day	Yes	No	<250 mg/day	No	Yes	Yes	Yes	No
Visit 5	1.5 Tesla (T)		Yes	09_024	29MAR17	29MAR2017	29MAR17	29MAR2017	Week 24	COMPLETE ANATOMIC COVERAGE PRESENT. MILD TO MODERATE BREATHING AND MOTION ARTIFACTS NOTED.	16.3	10.3062	17.2		-0.9		09	Entered	47	Male	04OCT16	168	Placebo	>=250 mg/day	Yes	No	<250 mg/day	No	Yes	Yes	Yes	No
				09_025					Baseline	COMPLETE ANATOMIC COVERAGE PRESENT. MILD BREATHING AND MOTION ARTIFACTS NOTED	15.3		15.3				09	Screen Failure	70	Female							<250 mg/day	Yes	No	No	No	No
Visit 2	1.5 Tesla (T)		Yes	09_026	21NOV16	21NOV2016	21NOV16	21NOV2016	Baseline	COMPLETE ANATOMIC COVERAGE PRESENT. MILD BREATHING AND MOTION ARTIFACTS NOTED	9.9	2.36728	9.9	2.36728			09	Entered	55	Female	12DEC16	171	Placebo	>=250 mg/day	No	No	<250 mg/day	No	Yes	Yes	Yes	Yes
Visit 5		Uncontrollable claustrophobia	No	09_026					Week 24			3.87287	9.9	2.36728		1.50559	09	Entered	55	Female	12DEC16	171	Placebo	>=250 mg/day	No	No	<250 mg/day	No	Yes	Yes	Yes	Yes
Visit 2	1.5 Tesla (T)		Yes	09_027	22NOV16	22NOV2016	22NOV16	22NOV2016	Baseline	MILD MOTION ARTIFACT IS PRESENT.	3.4		3.4				09	Early Termination	60	Female	12DEC16	107	Placebo	>=250 mg/day	Yes	No	<250 mg/day	No	Yes	Yes	No	No
				09_028					Baseline	COMPLETE ANATOMIC COVERAGE PRESENT.BREATHING AND MOVEMENT ARTIFACTS NOTED.	1.6		1.6				09	Screen Failure	44	Female							<250 mg/day	Yes	No	No	No	No
Visit 2	1.5 Tesla (T)		Yes	09_029	22NOV16	22NOV2016	22NOV16	22NOV2016	Baseline	AT LEAST MODERATE ARTIFACT IS PRESENT.	4.8	4.4482	4.8	4.4482			09	Early Termination	63	Female	12DEC16	106	MF4637	>=250 mg/day	Yes	No	<250 mg/day	No	Yes	Yes	No	No
Visit 2	1.5 Tesla (T)		Yes	09_030	22NOV16	22NOV2016	22NOV16	22NOV2016	Baseline	MODERATELY SEVERE BREATHING ARTIFACT.	5		5				09	Entered	59	Female	12DEC16	170	MF4637	>=250 mg/day	No	No	<250 mg/day	No	Yes	Yes	Yes	Yes
Visit 5	1.5 Tesla (T)		Yes	09_030	29MAY17	29MAY2017	29MAY17	29MAY2017	Week 24		3.9	4.68127	5		-1.1		09	Entered	59	Female	12DEC16	170	MF4637	>=250 mg/day	No	No	<250 mg/day	No	Yes	Yes	Yes	Yes
Visit 2	1.5 Tesla (T)		Yes	10_009	24JUN16	24JUN2016	27JUN16	27JUN2016	Baseline	COMPLETE ANATOMIC COVERAGE PRESENT.SLIGHT BREATHING AND MOVEMENT ARTIFACTS NOTED. SCAN TECHNICAL QUALITY ACCEPTABLE.	23.7	28.0104	23.7	28.0104			10	Entered	64	Female	27JUN16	176	MF4637	<250 mg/day	No	No	<250 mg/day	No	Yes	Yes	Yes	Yes
Visit 5	1.5 Tesla (T)		Yes	10_009	12DEC16	12DEC2016	12DEC16	12DEC2016	Week 24	COMPLETE ANATOMIC COVERAGE PRESENT. SLIGHT BREATHING AND MOVEMENT ARTIFACTS NOTED. SCAN TECHNICAL QUALITY ACCEPTABLE.	19.7	39.7839	23.7	28.0104	-4	11.7735	10	Entered	64	Female	27JUN16	176	MF4637	<250 mg/day	No	No	<250 mg/day	No	Yes	Yes	Yes	Yes
Visit 2	1.5 Tesla (T)		Yes	10_010	27SEP16	27SEP2016	27SEP16	27SEP2016	Baseline	COMPLETE ANATOMIC COVERAGE PRESENT.SLIGHT BREATHING AND MOVEMENT ARTIFACTS NOTED. SCAN TECHNICAL QUALITY ACCEPTABLE.	25.6	55.9943	25.6	55.9943			10	Entered	34	Male	27SEP16	175	Placebo	>=250 mg/day	No	No	>=250 mg/day	No	Yes	Yes	Yes	Yes
Visit 5	1.5 Tesla (T)		Yes	10_010	15MAR17	15MAR2017	15MAR17	15MAR2017	Week 24	COMPLETE ANATOMIC COVERAGE PRESENT.SLIGHT BREATHING AND MOVEMENT ARTIFACTS NOTED. SCAN TECHNICAL QUALITY ACCEPTABLE.	23.4	54.9036	25.6	55.9943	-2.2	-1.09076	10	Entered	34	Male	27SEP16	175	Placebo	>=250 mg/day	No	No	>=250 mg/day	No	Yes	Yes	Yes	Yes
Visit 2	1.5 Tesla (T)		Yes	10_012	12OCT16	12OCT2016	12OCT16	12OCT2016	Baseline	COMPLETE ANATOMIC COVERAGE PRESENT. SLIGHT BREATHING AND MOVEMENT ARTIFACTS NOTED. SCAN TECHNICAL QUALITY ACCEPTABLE.	29.7	14.8371	29.7	14.8371			10	Entered	53	Male	12OCT16	177	Placebo	<250 mg/day	No	Yes	<250 mg/day	No	Yes	Yes	Yes	Yes
Visit 5	1.5 Tesla (T)		Yes	10_012	28MAR17	28MAR2017	28MAR17	28MAR2017	Week 24	COMPLETE ANATOMIC COVERAGE PRESENT.SLIGHT BREATHING AND MOVEMENT ARTIFACTS NOTED. SCAN TECHNICAL QUALITY ACCEPTABLE.	21.4	7.89647	29.7	14.8371	-8.3	-6.94066	10	Entered	53	Male	12OCT16	177	Placebo	<250 mg/day	No	Yes	<250 mg/day	No	Yes	Yes	Yes	Yes
Visit 2	1.5 Tesla (T)		Yes	11_003	15SEP16	15SEP2016	26SEP16	26SEP2016	Baseline	COMPLETE ANATOMIC COVERAGE PRESENT. SLIGHT BREATHING AND MOVEMENT ARTIFACTS NOTED. SCAN TECHNICAL QUALITY ACCEPTABLE.	28.7	53.6582	28.7	53.6582			11	Early Termination	52	Male	15SEP16	142	Placebo	<250 mg/day	Yes	Yes	>=250 mg/day	No	Yes	Yes	Yes	Yes
Visit 2	1.5 Tesla (T)		Yes	11_004	02SEP16	02SEP2016	02SEP16	02SEP2016	Baseline	COMPLETE ANATOMIC COVERAGE PRESENT.SLIGHT BREATHING AND MOVEMENT ARTIFACTS NOTED. SCAN TECHNICAL QUALITY ACCEPTABLE.	27.1	3.10892	27.1	3.10892			11	Entered	42	Female	02SEP16	140	MF4637	<250 mg/day	Yes	No	<250 mg/day	No	Yes	Yes	Yes	Yes
Visit 5	1.5 Tesla (T)		Yes	11_004	15FEB17	15FEB2017	09MAR17	09MAR2017	Week 24	COMPLETE ANATOMIC COVERAGE PRESENT. SCAN QUALITY SUB-OPTIMAL WITH SEVERE BREATHING AND MOVEMENT ARTIFACTS NOTED.	6.3	1.5145	27.1	3.10892	-20.8	-1.59443	11	Entered	42	Female	02SEP16	140	MF4637	<250 mg/day	Yes	No	<250 mg/day	No	Yes	Yes	Yes	Yes
Visit 2	1.5 Tesla (T)		Yes	11_005	26SEP16	26SEP2016	26SEP16	26SEP2016	Baseline	COMPLETE ANATOMIC COVERAGE PRESENT.SLIGHT BREATHING AND MOVEMENT ARTIFACTS NOTED. SCAN TECHNICAL QUALITY ACCEPTABLE.	28.3	33.1751	28.3	33.1751			11	Early Termination	63	Male	26SEP16	141	MF4637	>=250 mg/day	No	No	>=250 mg/day	No	Yes	Yes	No	No
Visit 2	1.5 Tesla (T)		Yes	11_006	29SEP16	29SEP2016	13OCT16	13OCT2016	Baseline	COMPLETE ANATOMIC COVERAGE PRESENT. PHASE ENCODING MOTION AND BREATHING ARTIFACTS NOTED	44.2	13.2469	44.2	13.2469			11	Entered	54	Female	29SEP16	146	Placebo	<250 mg/day	Yes	No	>=250 mg/day	No	Yes	Yes	Yes	Yes
Visit 5	1.5 Tesla (T)		Yes	11_006	10MAR17	10MAR2017	28MAR17	28MAR2017	Week 24	COMPLETE ANATOMIC COVERAGE PRESENT BUT NOTICEABLE ARTIFACTS NOTED.	15.4	2.95191	44.2	13.2469	-28.8	-10.2949	11	Entered	54	Female	29SEP16	146	Placebo	<250 mg/day	Yes	No	>=250 mg/day	No	Yes	Yes	Yes	Yes
Visit 2	1.5 Tesla (T)		Yes	11_008	27SEP16	27SEP2016	27SEP16	27SEP2016	Baseline	COMPLETE ANATOMIC COVERAGE PRESENT. PHASE ENCODING MOTION AND BREATHING ARTIFACTS NOTED	28.1	4.66786	28.1	4.66786			11	Entered	42	Male	27SEP16	144	MF4637	<250 mg/day	No	No	>=250 mg/day	No	Yes	Yes	Yes	Yes
Visit 5	1.5 Tesla (T)		Yes	11_008	09MAR17	09MAR2017	28MAR17	28MAR2017	Week 24	COMPLETE ANATOMIC COVERAGE PRESENT. PHASE ENCODING MOTION AND BREATHING ARTIFACTS NOTED	15.3	4.1238	28.1	4.66786	-12.8	-0.544058	11	Entered	42	Male	27SEP16	144	MF4637	<250 mg/day	No	No	>=250 mg/day	No	Yes	Yes	Yes	Yes
Visit 2	1.5 Tesla (T)		Yes	11_009	30SEP16	30SEP2016	13OCT16	13OCT2016	Baseline	COMPLETE ANATOMIC COVERAGE PRESENT. PHASE ENCODING MOTION AND BREATHING ARTIFACTS NOTEDF	32.8	20.124	32.8	20.124			11	Entered	50	Female	01OCT16	147	Placebo	<250 mg/day	No	No	<250 mg/day	No	Yes	Yes	Yes	Yes
Visit 5	1.5 Tesla (T)		Yes	11_009	09MAR17	09MAR2017	28MAR17	28MAR2017	Week 24	ALL 9 REGIONS WERE PLACED IN POSTERIOR INFERIOR PART OF RIGHT LOBE DUE TO SIGNIFICANT ARTIFACTS	17.2	30.4656	32.8	20.124	-15.6	10.3416	11	Entered	50	Female	01OCT16	147	Placebo	<250 mg/day	No	No	<250 mg/day	No	Yes	Yes	Yes	Yes
Visit 2	1.5 Tesla (T)		Yes	11_010	20SEP16	20SEP2016	26SEP16	26SEP2016	Baseline	COMPLETE ANATOMIC COVERAGE PRESENT. PHASE ENCODING MOTION AND BREATHING ARTIFACTS NOTED	4.6	21.5114	4.6	21.5114			11	Entered	52	Female	27SEP16	143	Placebo	<250 mg/day	No	Yes	<250 mg/day	No	Yes	Yes	Yes	Yes
Visit 5	1.5 Tesla (T)		Yes	11_010	10MAR17	10MAR2017	28MAR17	28MAR2017	Week 24	COMPLETE ANATOMIC COVERAGE PRESENT BUT MODERATE TO SIGNIFICANT ARTIFACTS NOTED.	4.8	15.4938	4.6	21.5114	0.2	-6.01765	11	Entered	52	Female	27SEP16	143	Placebo	<250 mg/day	No	Yes	<250 mg/day	No	Yes	Yes	Yes	Yes
Visit 2	1.5 Tesla (T)		Yes	11_011	11OCT16	11OCT2016	13OCT16	13OCT2016	Baseline	COMPLETE ANATOMIC COVERAGE PRESENT. PHASE ENCODING MOTION ARTIFACTS NOTED	8.3	18.162	8.3	18.162			11	Entered	41	Female	19OCT16	244	Placebo	<250 mg/day	No	No	>=250 mg/day	No	Yes	Yes	Yes	Yes
Visit 5	1.5 Tesla (T)		Yes	11_011	28MAR17	28MAR2017	02MAY17	02MAY2017	Week 24	COMPLETE ANATOMIC COVERAGE PRESENT. BREATHING AND MOTION ARTIFACTS NOTED	3.1	15.054	8.3	18.162	-5.2	-3.10803	11	Entered	41	Female	19OCT16	244	Placebo	<250 mg/day	No	No	>=250 mg/day	No	Yes	Yes	Yes	Yes
Visit 2	1.5 Tesla (T)		Yes	11_012	17OCT16	17OCT2016	28OCT16	28OCT2016	Baseline		8	16.4736	8	16.4736			11	Entered	40	Female	18OCT16	145	MF4637	<250 mg/day	No	No	<250 mg/day	No	Yes	Yes	Yes	Yes
Visit 5	1.5 Tesla (T)		Yes	11_012	04APR17	04APR2017	02MAY17	02MAY2017	Week 24	INCREASED NOISE IS PRESENT COMPARED TO BASELINE.	4.8	24.3756	8	16.4736	-3.2	7.90199	11	Entered	40	Female	18OCT16	145	MF4637	<250 mg/day	No	No	<250 mg/day	No	Yes	Yes	Yes	Yes
Visit 2	1.5 Tesla (T)		Yes	11_014	16NOV16	16NOV2016	07DEC16	07DEC2016	Baseline		16	3.86669	16	3.86669			11	Entered	49	Female	17NOV16	247	Placebo	>=250 mg/day	No	No	>=250 mg/day	No	Yes	Yes	Yes	No
Visit 5	1.5 Tesla (T)		Yes	11_014	04MAY17	04MAY2017	25MAY17	25MAY2017	Week 24		13.2	3.87157	16	3.86669	-2.8	0.00488021	11	Entered	49	Female	17NOV16	247	Placebo	>=250 mg/day	No	No	>=250 mg/day	No	Yes	Yes	Yes	No
Visit 2	1.5 Tesla (T)		Yes	11_015	10NOV16	10NOV2016	07DEC16	07DEC2016	Baseline	COMPLETE ANATOMIC COVERAGE PRESENT. MODERATE BREATHING AND MOVEMENT ARTIFACTS NOTED.	4.7	1.24114	4.7	1.24114			11	Entered	62	Male	10NOV16	245	MF4637	<250 mg/day	No	No	>=250 mg/day	No	Yes	Yes	Yes	Yes
Visit 5	1.5 Tesla (T)		Yes	11_015	25APR17	25APR2017	02MAY17	02MAY2017	Week 24	ARTIFACT IS PRESENT IN SOME LIVER SEGMENTS.	2.8	0.890561	4.7	1.24114	-1.9	-0.350577	11	Entered	62	Male	10NOV16	245	MF4637	<250 mg/day	No	No	>=250 mg/day	No	Yes	Yes	Yes	Yes
Visit 2	1.5 Tesla (T)		Yes	11_017	22NOV16	22NOV2016	07DEC16	07DEC2016	Baseline	COMPLETE ANATOMIC COVERAGE PRESENT. MODERATE TO SEVERE BREATHING AND MOVEMENT ARTIFACTS NOTED.	3.6		3.6				11	Entered	32	Female	28NOV16	246	MF4637	<250 mg/day	No	No	<250 mg/day	No	Yes	Yes	Yes	Yes
Visit 5	1.5 Tesla (T)		Yes	11_017	09MAY17	09MAY2017	25MAY17	25MAY2017	Week 24		4.5	12.5788	3.6		0.9		11	Entered	32	Female	28NOV16	246	MF4637	<250 mg/day	No	No	<250 mg/day	No	Yes	Yes	Yes	Yes
Visit 2	1.5 Tesla (T)		Yes	11_018	28NOV16	28NOV2016	07DEC16	07DEC2016	Baseline	COMPLETE ANATOMIC COVERAGE PRESENT. MILD TO MODERATE BREATHING AND MOTION ARTIFACTS NOTED.	9.7	2.08464	9.7	2.08464			11	Entered	45	Female	29NOV16	248	Placebo	<250 mg/day	No	No	>=250 mg/day	No	Yes	Yes	Yes	Yes
Visit 5	1.5 Tesla (T)		Yes	11_018	09MAY17	09MAY2017	25MAY17	25MAY2017	Week 24	COMPLETE ANATOMIC COVERAGE PRESENT. MILD TO MODERATE BREATHING AND MOTION ARTIFACTS NOTED.	8.9	1.61803	9.7	2.08464	-0.8	-0.466611	11	Entered	45	Female	29NOV16	248	Placebo	<250 mg/day	No	No	>=250 mg/day	No	Yes	Yes	Yes	Yes
Visit 2	1.5 Tesla (T)		Yes	12_001	14OCT16	14OCT2016	14OCT16	14OCT2016	Baseline	COMPLETE ANATOMIC COVERAGE PRESENT. MILD BREATHING AND MOTION ARTIFACTS NOTED.	36.4	52.9196	36.4	52.9196			12	Entered	66	Male	14OCT16	257	MF4637	>=250 mg/day	Yes	Yes	>=250 mg/day	No	Yes	Yes	Yes	Yes
Visit 5	1.5 Tesla (T)		Yes	12_001	29MAR17	29MAR2017	29MAR17	29MAR2017	Week 24	COMPLETE ANATOMIC COVERAGE PRESENT. PROMINENT BREATHING AND MOTION ARTIFACTS NOTED.	16.4	35.5339	36.4	52.9196	-20	-17.3857	12	Entered	66	Male	14OCT16	257	MF4637	>=250 mg/day	Yes	Yes	>=250 mg/day	No	Yes	Yes	Yes	Yes
Visit 2	1.5 Tesla (T)		Yes	12_003	11OCT16	11OCT2016	11OCT16	11OCT2016	Baseline	COMPLETE ANATOMIC COVERAGE PRESENT.SLIGHT BREATHING AND MOVEMENT ARTIFACTS NOTED. SCAN TECHNICAL QUALITY ACCEPTABLE.	28.4	50.7624	28.4	50.7624			12	Entered	52	Male	11OCT16	138	Placebo	>=250 mg/day	Yes	No	>=250 mg/day	No	Yes	Yes	Yes	Yes
Visit 5	1.5 Tesla (T)		Yes	12_003	28MAR17	28MAR2017	28MAR17	28MAR2017	Week 24	COMPLETE ANATOMIC COVERAGE PRESENT. SLIGHT BREATHING AND MOVEMENT ARTIFACTS NOTED. SCAN TECHNICAL QUALITY ACCEPTABLE.	19.2	57.1967	28.4	50.7624	-9.2	6.43427	12	Entered	52	Male	11OCT16	138	Placebo	>=250 mg/day	Yes	No	>=250 mg/day	No	Yes	Yes	Yes	Yes
Visit 2	1.5 Tesla (T)		Yes	12_004	22SEP16	22SEP2016	26SEP16	26SEP2016	Baseline	COMPLETE ANATOMIC COVERAGE PRESENT. MILD TO MODERATE BREATHING AND MOTION ARTIFACTS NOTED.	22.7	13.8152	22.7	13.8152			12	Entered	70	Male	22SEP16	133	Placebo	>=250 mg/day	Yes	Yes	>=250 mg/day	No	Yes	Yes	Yes	Yes
Visit 5	1.5 Tesla (T)		Yes	12_004	14MAR17	14MAR2017	14MAR17	14MAR2017	Week 24	COMPLETE ANATOMIC COVERAGE PRESENT. PROMINENT BREATHING AND MOTION ARTIFACTS NOTED.	11.6	15.3198	22.7	13.8152	-11.1	1.50458	12	Entered	70	Male	22SEP16	133	Placebo	>=250 mg/day	Yes	Yes	>=250 mg/day	No	Yes	Yes	Yes	Yes
Visit 2	1.5 Tesla (T)		Yes	12_006	22SEP16	22SEP2016	26SEP16	26SEP2016	Baseline	MILD BREATHING ARTIFACT IS PRESENT.	9.2	53.6291	9.2	53.6291			12	Entered	76	Female	22SEP16	132	MF4637	<250 mg/day	Yes	Yes	<250 mg/day	No	Yes	Yes	Yes	Yes
Visit 5	1.5 Tesla (T)		Yes	12_006	13MAR17	13MAR2017	13MAR17	13MAR2017	Week 24	LIMITED EVALUATION SECONDARY TO SIGNIFICANT ARTIFACTS. MOST OF THE LIVER SEGMENTS ARE NOT EVALUABLE THEREFORE ROI'S ARE RELEGATED TO SEGMENTS WITH THE LEAST AMOUNT OF ARTIFACT.	2.9	37.0582	9.2	53.6291	-6.3	-16.5709	12	Entered	76	Female	22SEP16	132	MF4637	<250 mg/day	Yes	Yes	<250 mg/day	No	Yes	Yes	Yes	Yes
Visit 2	1.5 Tesla (T)		Yes	12_007	30SEP16	30SEP2016	03OCT16	03OCT2016	Baseline	COMPLETE ANATOMIC COVERAGE PRESENT. MILD BREATHING AND MOTION ARTIFACTS NOTED.	24.3	12.3428	24.3	12.3428			12	Entered	64	Female	30SEP16	134	Placebo	>=250 mg/day	No	Yes	>=250 mg/day	No	Yes	Yes	Yes	Yes
Visit 5	1.5 Tesla (T)		Yes	12_007	14MAR17	14MAR2017	14MAR17	14MAR2017	Week 24	COMPLETE ANATOMIC COVERAGE PRESENT BUT SIGNIFICANT ARTIFACTS NOTED. SEGMENTS EXCEPT 6 AND 7 WERE PLACED NOT ACCORDING ANATOMICAL LOCATION.	12.4	14.0269	24.3	12.3428	-11.9	1.68409	12	Entered	64	Female	30SEP16	134	Placebo	>=250 mg/day	No	Yes	>=250 mg/day	No	Yes	Yes	Yes	Yes
Visit 2	1.5 Tesla (T)		Yes	12_009	26OCT16	26OCT2016	31OCT16	31OCT2016	Baseline	MILD BREATHING ARTIFACT.	17.5	30.2728	17.5	30.2728			12	Early Termination	53	Female	26OCT16	260	MF4637	>=250 mg/day	Yes	Yes	>=250 mg/day	No	Yes	Yes	Yes	Yes
Visit 2	1.5 Tesla (T)		Yes	12_013	30SEP16	30SEP2016	03OCT16	03OCT2016	Baseline		18.9	43.111	18.9	43.111			12	Entered	52	Female	30SEP16	137	MF4637	>=250 mg/day	No	Yes	>=250 mg/day	No	Yes	Yes	Yes	Yes
Visit 5	1.5 Tesla (T)		Yes	12_013	06APR17	06APR2017	07APR17	07APR2017	Week 24	MILD ARTIFACT IS PRESENT.	8.7	34.7113	18.9	43.111	-10.2	-8.39967	12	Entered	52	Female	30SEP16	137	MF4637	>=250 mg/day	No	Yes	>=250 mg/day	No	Yes	Yes	Yes	Yes
Visit 2	1.5 Tesla (T)		Yes	12_014	30SEP16	30SEP2016	03OCT16	03OCT2016	Baseline	COMPLETE ANATOMIC COVERAGE PRESENT. SLIGHT BREATHING AND MOVEMENT ARTIFACTS NOTED. SCAN TECHNICAL QUALITY ACCEPTABLE.	31.3	2.54424	31.3	2.54424			12	Entered	66	Female	30SEP16	136	Placebo	>=250 mg/day	Yes	Yes	>=250 mg/day	No	Yes	Yes	Yes	Yes
Visit 5	1.5 Tesla (T)		Yes	12_014	14MAR17	14MAR2017	14MAR17	14MAR2017	Week 24	LIMITED EVALUATION DUE TO SIGNIFICANT ARTIFACTS. SOME OF THE SEGMENTS ARE NOT EVALUABLE AND HENCE THE ROIS PLACED IN REGIONS WITH LESS ARTIFACTS.	22.6	2.9817	31.3	2.54424	-8.7	0.437463	12	Entered	66	Female	30SEP16	136	Placebo	>=250 mg/day	Yes	Yes	>=250 mg/day	No	Yes	Yes	Yes	Yes
Visit 2	1.5 Tesla (T)		Yes	12_015	30SEP16	30SEP2016	03OCT16	03OCT2016	Baseline	COMPLETE ANATOMIC COVERAGE PRESENT.SLIGHT BREATHING AND MOVEMENT ARTIFACTS NOTED. SCAN TECHNICAL QUALITY ACCEPTABLE.	37.5	15.8374	37.5	15.8374			12	Early Termination	47	Female	30SEP16	135	MF4637	>=250 mg/day	Yes	Yes	>=250 mg/day	No	Yes	Yes	Yes	Yes
Visit 2	1.5 Tesla (T)		Yes	12_016	05OCT16	05OCT2016	05OCT16	05OCT2016	Baseline	COMPLETE ANATOMIC COVERAGE PRESENT. MILD TO MODERATE BREATHING AND MOTION ARTIFACTS NOTED.	36.5	18.6401	36.5	18.6401			12	Entered	52	Female	05OCT16	103	MF4637	<250 mg/day	No	No	<250 mg/day	No	Yes	Yes	Yes	Yes
Visit 5	1.5 Tesla (T)		Yes	12_016	21MAR17	21MAR2017	22MAR17	22MAR2017	Week 24	COMPLETE ANATOMIC COVERAGE PRESENT. MILD TO MODERATE BREATHING AND MOTION ARTIFACTS NOTED.	28.6	11.7664	36.5	18.6401	-7.9	-6.87365	12	Entered	52	Female	05OCT16	103	MF4637	<250 mg/day	No	No	<250 mg/day	No	Yes	Yes	Yes	Yes
Visit 2	1.5 Tesla (T)		Yes	12_017	05OCT16	05OCT2016	05OCT16	05OCT2016	Baseline	COMPLETE ANATOMIC COVERAGE PRESENT. MILD TO MODERATE BREATHING AND MOTION ARTIFACTS NOTED.	30.6	33.977	30.6	33.977			12	Entered	57	Female	05OCT16	100	Placebo	>=250 mg/day	Yes	Yes	>=250 mg/day	No	Yes	Yes	Yes	Yes
Visit 5	1.5 Tesla (T)		Yes	12_017	21MAR17	21MAR2017	22MAR17	22MAR2017	Week 24	COMPLETE ANATOMIC COVERAGE PRESENT. MODERATE BREATHING AND MOTION ARTIFACTS NOTED.	17.6	27.8276	30.6	33.977	-13	-6.14942	12	Entered	57	Female	05OCT16	100	Placebo	>=250 mg/day	Yes	Yes	>=250 mg/day	No	Yes	Yes	Yes	Yes
Visit 2	1.5 Tesla (T)		Yes	12_019	05OCT16	05OCT2016	05OCT16	05OCT2016	Baseline		42.4	66.2734	42.4	66.2734			12	Entered	53	Male	05OCT16	102	Placebo	<250 mg/day	Yes	Yes	<250 mg/day	No	Yes	Yes	Yes	Yes
Visit 5	1.5 Tesla (T)		Yes	12_019	21MAR17	21MAR2017	22MAR17	22MAR2017	Week 24	MILD ARTIFACT IS PRESENT.	35.8	45.1006	42.4	66.2734	-6.6	-21.1728	12	Entered	53	Male	05OCT16	102	Placebo	<250 mg/day	Yes	Yes	<250 mg/day	No	Yes	Yes	Yes	Yes
Visit 2	1.5 Tesla (T)		Yes	12_020	05OCT16	05OCT2016	05OCT16	05OCT2016	Baseline	COMPLETE ANATOMIC COVERAGE PRESENT. SLIGHT BREATHING AND MOVEMENT ARTIFACTS NOTED. SCAN TECHNICAL QUALITY ACCEPTABLE.	11.1	10.9315	11.1	10.9315			12	Entered	60	Female	05OCT16	101	MF4637	>=250 mg/day	Yes	Yes	>=250 mg/day	No	Yes	Yes	Yes	Yes
Visit 5	1.5 Tesla (T)		Yes	12_020	21MAR17	21MAR2017	22MAR17	22MAR2017	Week 24	COMPLETE ANATOMIC COVERAGE PRESENT.SLIGHT BREATHING AND MOVEMENT ARTIFACTS NOTED. SCAN TECHNICAL QUALITY ACCEPTABLE.	8.1	6.15986	11.1	10.9315	-3	-4.77169	12	Entered	60	Female	05OCT16	101	MF4637	>=250 mg/day	Yes	Yes	>=250 mg/day	No	Yes	Yes	Yes	Yes
Visit 2	1.5 Tesla (T)		Yes	12_021	11OCT16	11OCT2016	11OCT16	11OCT2016	Baseline	MILD BREATHING ARTIFACT IS PRESENT	21.4	30.4018	21.4	30.4018			12	Entered	54	Male	11OCT16	254	MF4637	>=250 mg/day	Yes	Yes	>=250 mg/day	No	Yes	Yes	Yes	Yes
Visit 5	1.5 Tesla (T)		Yes	12_021	20APR17	20APR2017	20APR17	20APR2017	Week 24	MILD ARTIFACT AND INHOMOGENEITY ARE PRESENT.	14.9	51.95	21.4	30.4018	-6.5	21.5482	12	Entered	54	Male	11OCT16	254	MF4637	>=250 mg/day	Yes	Yes	>=250 mg/day	No	Yes	Yes	Yes	Yes
Visit 2	1.5 Tesla (T)		Yes	12_022	12OCT16	12OCT2016	12OCT16	12OCT2016	Baseline	COMPLETE ANATOMIC COVERAGE PRESENT.SLIGHT BREATHING AND MOVEMENT ARTIFACTS NOTED. SCAN TECHNICAL QUALITY ACCEPTABLE.	19.9	20.3462	19.9	20.3462			12	Entered	43	Male	12OCT16	253	Placebo	<250 mg/day	Yes	No	<250 mg/day	No	Yes	Yes	Yes	Yes
Visit 5	1.5 Tesla (T)		Yes	12_022	28MAR17	28MAR2017	28MAR17	28MAR2017	Week 24	SEVERE ARTIFACTS NOTED LIMITING EVALUATION.	7.9	5.62455	19.9	20.3462	-12	-14.7216	12	Entered	43	Male	12OCT16	253	Placebo	<250 mg/day	Yes	No	<250 mg/day	No	Yes	Yes	Yes	Yes
Visit 2	1.5 Tesla (T)		Yes	12_024	11OCT16	11OCT2016	11OCT16	11OCT2016	Baseline	COMPLETE ANATOMIC COVERAGE PRESENT. MODERATE BREATHING AND MOTION ARTIFACTS NOTED.	39.9	30.887	39.9	30.887			12	Early Termination	41	Female	11OCT16	139	MF4637	>=250 mg/day	Yes	No	>=250 mg/day	No	Yes	Yes	Yes	Yes
Visit 2	1.5 Tesla (T)		Yes	12_025	14OCT16	14OCT2016	14OCT16	14OCT2016	Baseline	COMPLETE ANATOMIC COVERAGE PRESENT. MODERATE BREATHING AND MOTION ARTIFACTS NOTED.	18.4	5.7743	18.4	5.7743			12	Entered	73	Male	14OCT16	258	MF4637	>=250 mg/day	Yes	No	>=250 mg/day	No	Yes	Yes	Yes	Yes
Visit 5	1.5 Tesla (T)		Yes	12_025	29MAR17	29MAR2017	29MAR17	29MAR2017	Week 24	COMPLETE ANATOMIC COVERAGE PRESENT. SIGNIFICANT BREATHING AND MOTION ARTIFACTS NOTED.	11.3	6.16436	18.4	5.7743	-7.1	0.390066	12	Entered	73	Male	14OCT16	258	MF4637	>=250 mg/day	Yes	No	>=250 mg/day	No	Yes	Yes	Yes	Yes
Visit 2	1.5 Tesla (T)		Yes	12_027	12OCT16	12OCT2016	12OCT16	12OCT2016	Baseline	MILD BREATHING/MOTION ARTIFACT IS PRESENT.	28.2	12.756	28.2	12.756			12	Entered	56	Female	12OCT16	252	Placebo	<250 mg/day	No	Yes	<250 mg/day	No	Yes	Yes	Yes	Yes
Visit 5	1.5 Tesla (T)		Yes	12_027	30MAR17	30MAR2017	31MAR17	31MAR2017	Week 24	MILD ARTIFACT IS PRESENT.	6.9	7.5316	28.2	12.756	-21.3	-5.22438	12	Entered	56	Female	12OCT16	252	Placebo	<250 mg/day	No	Yes	<250 mg/day	No	Yes	Yes	Yes	Yes
Visit 2	1.5 Tesla (T)		Yes	12_028	14OCT16	14OCT2016	14OCT16	14OCT2016	Baseline			18.3118		18.3118			12	Entered	71	Female	14OCT16	259	Placebo	<250 mg/day	Yes	Yes	<250 mg/day	No	Yes	Yes	Yes	Yes
Visit 5	1.5 Tesla (T)		Yes	12_028	30MAR17	30MAR2017	31MAR17	31MAR2017	Week 24			21.2512		18.3118		2.93944	12	Entered	71	Female	14OCT16	259	Placebo	<250 mg/day	Yes	Yes	<250 mg/day	No	Yes	Yes	Yes	Yes
Visit 2	1.5 Tesla (T)		Yes	12_029	12OCT16	12OCT2016	12OCT16	12OCT2016	Baseline	COMPLETE ANATOMIC COVERAGE PRESENT. MODERATE BREATHING AND MOTION ARTIFACTS NOTED.	8.1	12.5622	8.1	12.5622			12	Entered	72	Male	12OCT16	256	Placebo	>=250 mg/day	Yes	Yes	>=250 mg/day	No	Yes	Yes	Yes	Yes
Visit 5	1.5 Tesla (T)		Yes	12_029	28MAR17	28MAR2017	28MAR17	28MAR2017	Week 24	COMPLETE ANATOMIC COVERAGE PRESENT. MODERATE BREATHING AND MOTION ARTIFACTS NOTED	5.4	10.0757	8.1	12.5622	-2.7	-2.48656	12	Entered	72	Male	12OCT16	256	Placebo	>=250 mg/day	Yes	Yes	>=250 mg/day	No	Yes	Yes	Yes	Yes
Visit 2	1.5 Tesla (T)		Yes	12_030	12OCT16	12OCT2016	12OCT16	12OCT2016	Baseline	COMPLETE ANATOMIC COVERAGE PRESENT.SLIGHT BREATHING AND MOVEMENT ARTIFACTS NOTED. SCAN TECHNICAL QUALITY ACCEPTABLE.	31	30.3798	31	30.3798			12	Entered	56	Male	12OCT16	255	MF4637	<250 mg/day	Yes	Yes	<250 mg/day	No	Yes	Yes	Yes	Yes
Visit 5	1.5 Tesla (T)		Yes	12_030	29MAR17	29MAR2017	29MAR17	29MAR2017	Week 24	MILD INHOMOGENEITY ARTIFACT IS PRESENT.	17.1	19.5212	31	30.3798	-13.9	-10.8586	12	Entered	56	Male	12OCT16	255	MF4637	<250 mg/day	Yes	Yes	<250 mg/day	No	Yes	Yes	Yes	Yes
Visit 2	1.5 Tesla (T)		Yes	12_032	02NOV16	02NOV2016	02NOV16	02NOV2016	Baseline	SEVERE BREATHING ARTIFACT IS PRESENT IN SOME PARTS OF THE LIVER.	19.2	61.3077	19.2	61.3077			12	Entered	67	Male	02NOV16	280	Placebo	>=250 mg/day	Yes	No	>=250 mg/day	No	Yes	Yes	Yes	Yes
Visit 5	1.5 Tesla (T)		Yes	12_032	18APR17	18APR2017	18APR17	18APR2017	Week 24	SEVERE BREATHING ARTIFACT IS PRESENT IN SOME PARTS OF THE LIVER. ROI'S PLACED IN LEAST AFFECTED AREAS.	9.8	58.2295	19.2	61.3077	-9.4	-3.07818	12	Entered	67	Male	02NOV16	280	Placebo	>=250 mg/day	Yes	No	>=250 mg/day	No	Yes	Yes	Yes	Yes
Visit 2	1.5 Tesla (T)		Yes	12_033	02NOV16	02NOV2016	02NOV16	02NOV2016	Baseline	COMPLETE ANATOMIC COVERAGE PRESENT. MODERATE BREATHING AND MOTION ARTIFACTS NOTED.	12.6	4.14801	12.6	4.14801			12	Entered	72	Female	02NOV16	282	MF4637	>=250 mg/day	Yes	No	>=250 mg/day	No	Yes	Yes	Yes	Yes
Visit 5	1.5 Tesla (T)		Yes	12_033	18APR17	18APR2017	19APR17	19APR2017	Week 24	COMPLETE ANATOMIC COVERAGE PRESENT. MODERATE BREATHING AND MOTION ARTIFACTS NOTED.	5.2	2.33374	12.6	4.14801	-7.4	-1.81426	12	Entered	72	Female	02NOV16	282	MF4637	>=250 mg/day	Yes	No	>=250 mg/day	No	Yes	Yes	Yes	Yes
Visit 2	1.5 Tesla (T)		Yes	12_034	26OCT16	26OCT2016	31OCT16	31OCT2016	Baseline	COMPLETE ANATOMIC COVERAGE PRESENT. SIGNIFICANT BREATHING AND MOVEMENT ARTIFACTS NOTED.	37.3	24.8403	37.3	24.8403			12	Entered	55	Female	26OCT16	261	Placebo	>=250 mg/day	Yes	No	>=250 mg/day	No	Yes	Yes	Yes	No
Visit 5	1.5 Tesla (T)		Yes	12_034	27APR17	27APR2017	27APR17	27APR2017	Week 24	BREATHING AND INHOMOGENEITY ARTIFACT IS PRESENT. DATA IS STILL FELT TO EVALUABLE.	24.9	24.3279	37.3	24.8403	-12.4	-0.512443	12	Entered	55	Female	26OCT16	261	Placebo	>=250 mg/day	Yes	No	>=250 mg/day	No	Yes	Yes	Yes	No
Visit 2	1.5 Tesla (T)		Yes	12_038	26OCT16	26OCT2016	31OCT16	31OCT2016	Baseline	COMPLETE ANATOMIC COVERAGE PRESENT. SLIGHT BREATHING AND MOVEMENT ARTIFACTS NOTED. SCAN TECHNICAL QUALITY ACCEPTABLE.	19.7	59.2281	19.7	59.2281			12	Entered	62	Male	26OCT16	263	Placebo	>=250 mg/day	Yes	Yes	>=250 mg/day	No	Yes	Yes	Yes	Yes
Visit 5	1.5 Tesla (T)		Yes	12_038	13APR17	13APR2017	13APR17	13APR2017	Week 24	INCREASED NOISE COMPARED TO BASELINE. ANALYSIS IS STILL POSSIBLE.	16.8	35.3738	19.7	59.2281	-2.9	-23.8543	12	Entered	62	Male	26OCT16	263	Placebo	>=250 mg/day	Yes	Yes	>=250 mg/day	No	Yes	Yes	Yes	Yes
Visit 2	1.5 Tesla (T)		Yes	12_039	26OCT16	26OCT2016	31OCT16	31OCT2016	Baseline	COMPLETE ANATOMIC COVERAGE PRESENT. MODERATE BREATHING AND MOTION ARTIFACTS NOTED.	15	13.7608	15	13.7608			12	Entered	57	Male	26OCT16	262	MF4637	<250 mg/day	No	No	<250 mg/day	No	Yes	Yes	Yes	Yes
Visit 5	1.5 Tesla (T)		Yes	12_039	13APR17	13APR2017	13APR17	13APR2017	Week 24	COMPLETE ANATOMIC COVERAGE PRESENT. MODERATE BREATHING AND MOTION ARTIFACTS NOTED.	6.1	9.25537	15	13.7608	-8.9	-4.50543	12	Entered	57	Male	26OCT16	262	MF4637	<250 mg/day	No	No	<250 mg/day	No	Yes	Yes	Yes	Yes
Visit 2	1.5 Tesla (T)		Yes	12_040	10NOV16	10NOV2016	10NOV16	10NOV2016	Baseline	COMPLETE ANATOMIC COVERAGE PRESENT. MILD BREATHING AND MOTION ARTIFACTS NOTED.	3.8	8.71248	3.8	8.71248			12	Entered	60	Female	10NOV16	292	MF4637	>=250 mg/day	Yes	Yes	>=250 mg/day	No	Yes	Yes	Yes	Yes
Visit 5	1.5 Tesla (T)		Yes	12_040	04MAY17	04MAY2017	04MAY17	04MAY2017	Week 24	COMPLETE ANATOMIC COVERAGE PRESENT. MILD TO MODERATE BREATHING AND MOTION ARTIFACTS NOTED.	3.1	8.79023	3.8	8.71248	-0.7	0.0777523	12	Entered	60	Female	10NOV16	292	MF4637	>=250 mg/day	Yes	Yes	>=250 mg/day	No	Yes	Yes	Yes	Yes
Visit 2	1.5 Tesla (T)		Yes	12_041	10NOV16	10NOV2016	10NOV16	10NOV2016	Baseline	SOME ARTIFACT IS PRESENT.	21.4	17.1166	21.4	17.1166			12	Early Termination	54	Female	10NOV16	293	Placebo	>=250 mg/day	Yes	Yes	>=250 mg/day	No	Yes	Yes	Yes	Yes
Visit 2	1.5 Tesla (T)		Yes	12_043	03NOV16	03NOV2016	03NOV16	03NOV2016	Baseline	COMPLETE ANATOMIC COVERAGE PRESENT. MODERATE BREATHING AND MOTION ARTIFACTS NOTED.	4.5	9.51323	4.5	9.51323			12	Entered	77	Male	03NOV16	283	MF4637	>=250 mg/day	Yes	Yes	>=250 mg/day	No	Yes	Yes	Yes	Yes
Visit 5	1.5 Tesla (T)		Yes	12_043	27APR17	27APR2017	27APR17	27APR2017	Week 24	COMPLETE ANATOMIC COVERAGE PRESENT. MODERATE BREATHING AND MOTION ARTIFACTS NOTED.	3.7	5.4845	4.5	9.51323	-0.8	-4.02874	12	Entered	77	Male	03NOV16	283	MF4637	>=250 mg/day	Yes	Yes	>=250 mg/day	No	Yes	Yes	Yes	Yes
Visit 2	1.5 Tesla (T)		Yes	12_044	02NOV16	02NOV2016	02NOV16	02NOV2016	Baseline		18.3	4.47714	18.3	4.47714			12	Entered	66	Male	02NOV16	281	Placebo	>=250 mg/day	Yes	Yes	>=250 mg/day	No	Yes	Yes	Yes	Yes
Visit 5	1.5 Tesla (T)		Yes	12_044	18APR17	18APR2017	18APR17	18APR2017	Week 24	SOME MOTION AND INHOMOGENEITY ARTIFACT IS PRESENT. DATA IS STILL FELT TO EVALUABLE.	7.9	2.55119	18.3	4.47714	-10.4	-1.92595	12	Entered	66	Male	02NOV16	281	Placebo	>=250 mg/day	Yes	Yes	>=250 mg/day	No	Yes	Yes	Yes	Yes
Visit 2	1.5 Tesla (T)		Yes	12_046	03NOV16	03NOV2016	03NOV16	03NOV2016	Baseline	COMPLETE ANATOMIC COVERAGE PRESENT. SEVERE BREATHING AND MOVEMENT ARTIFACTS NOTED.	4.7	4.1713	4.7	4.1713			12	Entered	75	Male	03NOV16	284	MF4637	>=250 mg/day	Yes	Yes	>=250 mg/day	No	Yes	Yes	Yes	Yes
Visit 5	1.5 Tesla (T)		Yes	12_046	20APR17	20APR2017	21APR17	21APR2017	Week 24	COMPLETE ANATOMIC COVERAGE PRESENT. MODERATE BREATHING AND MOTION ARTIFACTS NOTED.	3.1	2.69566	4.7	4.1713	-1.6	-1.47565	12	Entered	75	Male	03NOV16	284	MF4637	>=250 mg/day	Yes	Yes	>=250 mg/day	No	Yes	Yes	Yes	Yes
Visit 2		Uncontrollable claustrophobia	No	12_047					Baseline			13.7845		13.7845			12	Screen Failure	46	Male							<250 mg/day	Yes	No	No	No	No
Visit 2	1.5 Tesla (T)		Yes	12_048	03NOV16	03NOV2016	03NOV16	03NOV2016	Baseline	COMPLETE ANATOMIC COVERAGE PRESENT. SIGNIFICANT BREATHING AND MOVEMENT ARTIFACTS NOTED.	8.1	2.34315	8.1	2.34315			12	Entered	63	Female	03NOV16	285	MF4637	<250 mg/day	Yes	No	<250 mg/day	No	Yes	Yes	Yes	Yes
Visit 5	1.5 Tesla (T)		Yes	12_048	18APR17	18APR2017	19APR17	19APR2017	Week 24	COMPLETE ANATOMIC COVERAGE PRESENT. MILD TO MODERATE BREATHING AND MOTION ARTIFACTS NOTED.	5.2	1.50144	8.1	2.34315	-2.9	-0.841702	12	Entered	63	Female	03NOV16	285	MF4637	<250 mg/day	Yes	No	<250 mg/day	No	Yes	Yes	Yes	Yes
Visit 2	1.5 Tesla (T)		Yes	12_054	03NOV16	03NOV2016	03NOV16	03NOV2016	Baseline	SUB-OPTIMAL IMAGE QUALITY. HIGH SIGNAL TO NOISE RATIO.	12.5	86.4043	12.5	86.4043			12	Entered	60	Female	03NOV16	286	Placebo	>=250 mg/day	Yes	Yes	>=250 mg/day	No	Yes	Yes	Yes	Yes
Visit 5	1.5 Tesla (T)		Yes	12_054	20APR17	20APR2017	21APR17	21APR2017	Week 24		4.1	80.479	12.5	86.4043	-8.4	-5.92524	12	Entered	60	Female	03NOV16	286	Placebo	>=250 mg/day	Yes	Yes	>=250 mg/day	No	Yes	Yes	Yes	Yes
Visit 2	1.5 Tesla (T)		Yes	12_056	03NOV16	03NOV2016	03NOV16	03NOV2016	Baseline	ARTIFACT PRESENT. SUB-OPTIMAL IMAGE QUALITY.	20.5	33.5261	20.5	33.5261			12	Early Termination	61	Male	03NOV16	287	Placebo	<250 mg/day	Yes	Yes	<250 mg/day	No	Yes	Yes	Yes	Yes
Visit 2	1.5 Tesla (T)		Yes	12_057	10NOV16	10NOV2016	10NOV16	10NOV2016	Baseline	COMPLETE ANATOMIC COVERAGE PRESENT. SIGNIFICANT BREATHING AND MOVEMENT ARTIFACTS NOTED.	6.9	3.67813	6.9	3.67813			12	Entered	65	Female	10NOV16	294	Placebo	<250 mg/day	Yes	No	<250 mg/day	No	Yes	Yes	Yes	Yes
Visit 5	1.5 Tesla (T)		Yes	12_057	03MAY17	03MAY2017	03MAY17	03MAY2017	Week 24	ARTIFACT IS PRESENT IN SOME LIVER SEGMENTS.	5	2.5013	6.9	3.67813	-1.9	-1.17683	12	Entered	65	Female	10NOV16	294	Placebo	<250 mg/day	Yes	No	<250 mg/day	No	Yes	Yes	Yes	Yes
Visit 2	1.5 Tesla (T)		Yes	12_058	16NOV16	16NOV2016	17NOV16	17NOV2016	Baseline	COMPLETE ANATOMIC COVERAGE PRESENT. MILD TO MODERATE BREATHING AND MOTION ARTIFACTS NOTED.	4.2	23.0631	4.2	23.0631			12	Entered	68	Male	16NOV16	181	Placebo	<250 mg/day	Yes	Yes	<250 mg/day	No	Yes	Yes	Yes	Yes
Visit 5	1.5 Tesla (T)		Yes	12_058	03MAY17	03MAY2017	03MAY17	03MAY2017	Week 24	COMPLETE ANATOMIC COVERAGE PRESENT. MILD TO MODERATE BREATHING AND MOTION ARTIFACTS NOTED.	4.3	20.363	4.2	23.0631	0.1	-2.70007	12	Entered	68	Male	16NOV16	181	Placebo	<250 mg/day	Yes	Yes	<250 mg/day	No	Yes	Yes	Yes	Yes
Visit 2	1.5 Tesla (T)		Yes	12_062	16NOV16	16NOV2016	17NOV16	17NOV2016	Baseline	COMPLETE ANATOMIC COVERAGE PRESENT. MODERATE BREATHING AND MOTION ARTIFACTS NOTED.	35.3	36.7988	35.3	36.7988			12	Entered	53	Male	16NOV16	295	MF4637	<250 mg/day	Yes	No	<250 mg/day	No	Yes	Yes	Yes	Yes
Visit 5	1.5 Tesla (T)		Yes	12_062	03MAY17	03MAY2017	03MAY17	03MAY2017	Week 24	COMPLETE ANATOMIC COVERAGE PRESENT. MODERATE BREATHING AND MOTION ARTIFACTS NOTED.	26.6	28.3702	35.3	36.7988	-8.7	-8.4286	12	Entered	53	Male	16NOV16	295	MF4637	<250 mg/day	Yes	No	<250 mg/day	No	Yes	Yes	Yes	Yes
Visit 2	1.5 Tesla (T)		Yes	12_065	16NOV16	16NOV2016	17NOV16	17NOV2016	Baseline		6.6	12.3222	6.6	12.3222			12	Entered	76	Female	16NOV16	182	MF4637	<250 mg/day	Yes	Yes	<250 mg/day	No	Yes	Yes	Yes	Yes
Visit 5	1.5 Tesla (T)		Yes	12_065	10MAY17	10MAY2017	11MAY17	11MAY2017	Week 24		8.9	16.694	6.6	12.3222	2.3	4.37187	12	Entered	76	Female	16NOV16	182	MF4637	<250 mg/day	Yes	Yes	<250 mg/day	No	Yes	Yes	Yes	Yes
Visit 2	1.5 Tesla (T)		Yes	12_067	16NOV16	16NOV2016	17NOV16	17NOV2016	Baseline	ARTIFACT IS PRESENT IN SOME LIVER SEGMENTS.	11.2	16.2346	11.2	16.2346			12	Entered	72	Female	16NOV16	180	MF4637	>=250 mg/day	Yes	Yes	>=250 mg/day	No	Yes	Yes	Yes	Yes
Visit 5	1.5 Tesla (T)		Yes	12_067	04MAY17	04MAY2017	04MAY17	04MAY2017	Week 24	ARTIFACT IS PRESENT IN SOME LIVER SEGMENTS.	5.5	10.7094	11.2	16.2346	-5.7	-5.52518	12	Entered	72	Female	16NOV16	180	MF4637	>=250 mg/day	Yes	Yes	>=250 mg/day	No	Yes	Yes	Yes	Yes
Visit 2	1.5 Tesla (T)		Yes	12_068	21NOV16	21NOV2016	21NOV16	21NOV2016	Baseline	COMPLETE ANATOMIC COVERAGE PRESENT. MODERATE BREATHING AND MOTION ARTIFACTS NOTED.	5.2	2.67885	5.2	2.67885			12	Entered	78	Female	21NOV16	183	Placebo	>=250 mg/day	Yes	Yes	>=250 mg/day	No	Yes	Yes	Yes	Yes
Visit 5	1.5 Tesla (T)		Yes	12_068	04MAY17	04MAY2017	04MAY17	04MAY2017	Week 24	COMPLETE ANATOMIC COVERAGE PRESENT. MILD BREATHING AND MOTION ARTIFACTS NOTED.	6.7	1.55101	5.2	2.67885	1.5	-1.12784	12	Entered	78	Female	21NOV16	183	Placebo	>=250 mg/day	Yes	Yes	>=250 mg/day	No	Yes	Yes	Yes	Yes
Visit 2	3T		Yes	13_001	27OCT16	27OCT2016	27OCT16	27OCT2016	Baseline	COMPLETE ANATOMIC COVERAGE PRESENT.SLIGHT BREATHING AND MOVEMENT ARTIFACTS NOTED. SCAN TECHNICAL QUALITY ACCEPTABLE.	5.2	5.27024	5.2	5.27024			13	Entered	42	Female	28OCT16	162	Placebo	<250 mg/day	No	No	>=250 mg/day	No	Yes	Yes	Yes	Yes
Visit 5	3T		Yes	13_001	17APR17	17APR2017	17APR17	17APR2017	Week 24	MODERATE MOVEMENT ARTIFACTS NOTED. ROIS OF SOME OF THE SEGMENTS WITH ARTIFACTS DRAWN IN OTHER SEGMENTS WITH LESS ARTIFACTS.	5.3	6.27805	5.2	5.27024	0.1	1.00781	13	Entered	42	Female	28OCT16	162	Placebo	<250 mg/day	No	No	>=250 mg/day	No	Yes	Yes	Yes	Yes
Visit 2	3T		Yes	13_002	19OCT16	19OCT2016	19OCT16	19OCT2016	Baseline	COMPLETE ANATOMIC COVERAGE PRESENT. SLIGHT BREATHING AND MOVEMENT ARTIFACTS NOTED. SCAN TECHNICAL QUALITY ACCEPTABLE.	21.2	5.8957	21.2	5.8957			13	Entered	67	Female	20OCT16	204	MF4637	<250 mg/day	Yes	Yes	<250 mg/day	No	Yes	Yes	Yes	Yes
Visit 5	3T		Yes	13_002	05APR17	05APR2017	05APR17	05APR2017	Week 24	COMPLETE ANATOMIC COVERAGE PRESENT.SLIGHT BREATHING AND MOVEMENT ARTIFACTS NOTED. SCAN TECHNICAL QUALITY ACCEPTABLE.	17.3	5.68222	21.2	5.8957	-3.9	-0.213484	13	Entered	67	Female	20OCT16	204	MF4637	<250 mg/day	Yes	Yes	<250 mg/day	No	Yes	Yes	Yes	Yes
Visit 2	3T		Yes	13_003	19OCT16	19OCT2016	19OCT16	19OCT2016	Baseline	COMPLETE ANATOMIC COVERAGE PRESENT. MODERATE BREATHING AND MOTION ARTIFACTS NOTED.	1.8	14.314	1.8	14.314			13	Entered	65	Female	20OCT16	205	Placebo	<250 mg/day	Yes	Yes	<250 mg/day	No	Yes	Yes	Yes	Yes
Visit 5	3T		Yes	13_003	05APR17	05APR2017	05APR17	05APR2017	Week 24	COMPLETE ANATOMIC COVERAGE PRESENT. MILD TO MODERATE BREATHING AND MOTION ARTIFACTS NOTED.	7.7	20.642	1.8	14.314	5.9	6.32797	13	Entered	65	Female	20OCT16	205	Placebo	<250 mg/day	Yes	Yes	<250 mg/day	No	Yes	Yes	Yes	Yes
Visit 2	3T		Yes	13_004	19OCT16	19OCT2016	19OCT16	19OCT2016	Baseline	COMPLETE ANATOMIC COVERAGE PRESENT. SLIGHT BREATHING AND MOVEMENT ARTIFACTS NOTED. SCAN TECHNICAL QUALITY ACCEPTABLE.	4.4	14.27	4.4	14.27			13	Entered	69	Female	20OCT16	206	MF4637	<250 mg/day	No	Yes	<250 mg/day	No	Yes	Yes	Yes	Yes
				13_004					Week 24	COMPLETE ANATOMIC COVERAGE PRESENT.SLIGHT BREATHING AND MOVEMENT ARTIFACTS NOTED. SCAN TECHNICAL QUALITY ACCEPTABLE.	3.9	11.2745	4.4	14.27	-0.5	-2.99546	13	Entered	69	Female	20OCT16	206	MF4637	<250 mg/day	No	Yes	<250 mg/day	No	Yes	Yes	Yes	Yes
Visit 2	3T		Yes	13_005	07NOV16	07NOV2016	07NOV16	07NOV2016	Baseline	MILD BREATHING ARTIFACT IS PRESENT.	2.8	14.8786	2.8	14.8786			13	Entered	48	Male	10NOV16	276	MF4637	<250 mg/day	No	No	<250 mg/day	No	Yes	Yes	Yes	Yes
Visit 5	3T		Yes	13_005	25APR17	25APR2017	25APR17	25APR2017	Week 24	SOME MOTION AND INHOMOGENEITY ARTIFACT IS PRESENT. DATA IS STILL FELT TO EVALUABLE.	2.1	18.5882	2.8	14.8786	-0.7	3.70961	13	Entered	48	Male	10NOV16	276	MF4637	<250 mg/day	No	No	<250 mg/day	No	Yes	Yes	Yes	Yes
Visit 2	3T		Yes	13_006	27OCT16	27OCT2016	27OCT16	27OCT2016	Baseline	MILD BREATHING ARTIFACT PRESENT.	11.9	19.0966	11.9	19.0966			13	Entered	40	Male	28OCT16	160	MF4637	<250 mg/day	No	No	<250 mg/day	No	Yes	Yes	Yes	Yes
Visit 5	3T		Yes	13_006	10APR17	10APR2017	10APR17	10APR2017	Week 24	SOME ARTIFACT IS PRESENT BUT IMAGES ARE STILL EVALUABLE.	16.5	23.4206	11.9	19.0966	4.6	4.32406	13	Entered	40	Male	28OCT16	160	MF4637	<250 mg/day	No	No	<250 mg/day	No	Yes	Yes	Yes	Yes
Visit 2	3T		Yes	13_009	04NOV16	04NOV2016	04NOV16	04NOV2016	Baseline		32.3	26.2631	32.3	26.2631			13	Entered	51	Male	05NOV16	267	Placebo	<250 mg/day	No	Yes	>=250 mg/day	No	Yes	Yes	Yes	Yes
Visit 5	3T		Yes	13_009	18APR17	18APR2017	18APR17	18APR2017	Week 24	MILD BREATHING ARTIFACT IS PRESENT.	20.8	42.151	32.3	26.2631	-11.5	15.888	13	Entered	51	Male	05NOV16	267	Placebo	<250 mg/day	No	Yes	>=250 mg/day	No	Yes	Yes	Yes	Yes
Visit 2	3T		Yes	13_011	28OCT16	28OCT2016	28OCT16	28OCT2016	Baseline	COMPLETE ANATOMIC COVERAGE PRESENT. SLIGHT BREATHING AND MOVEMENT ARTIFACTS NOTED. SCAN TECHNICAL QUALITY ACCEPTABLE.	3.9	10.0332	3.9	10.0332			13	Entered	43	Male	28OCT16	207	Placebo	<250 mg/day	No	No	<250 mg/day	No	Yes	Yes	Yes	Yes
Visit 5	3T		Yes	13_011	18APR17	18APR2017	18APR17	18APR2017	Week 24	COMPLETE ANATOMIC COVERAGE PRESENT.SLIGHT BREATHING AND MOVEMENT ARTIFACTS NOTED. SCAN TECHNICAL QUALITY ACCEPTABLE.	1.7	26.1824	3.9	10.0332	-2.2	16.1491	13	Entered	43	Male	28OCT16	207	Placebo	<250 mg/day	No	No	<250 mg/day	No	Yes	Yes	Yes	Yes
Visit 2	3T		Yes	13_013	27OCT16	27OCT2016	27OCT16	27OCT2016	Baseline	COMPLETE ANATOMIC COVERAGE PRESENT. MILD BREATHING AND MOTION ARTIFACTS NOTED.	2.7	10.2041	2.7	10.2041			13	Entered	46	Male	28OCT16	161	MF4637	<250 mg/day	No	No	>=250 mg/day	No	Yes	Yes	Yes	Yes
Visit 5	3T		Yes	13_013	09MAY17	09MAY2017	09MAY17	09MAY2017	Week 24	COMPLETE ANATOMIC COVERAGE PRESENT. MILD TO MODERATE BREATHING AND MOTION ARTIFACTS NOTED.	6	14.0678	2.7	10.2041	3.3	3.86367	13	Entered	46	Male	28OCT16	161	MF4637	<250 mg/day	No	No	>=250 mg/day	No	Yes	Yes	Yes	Yes
Visit 2	3T		Yes	13_014	03NOV16	03NOV2016	03NOV16	03NOV2016	Baseline	COMPLETE ANATOMIC COVERAGE PRESENT. SLIGHT BREATHING AND MOVEMENT ARTIFACTS NOTED. SCAN TECHNICAL QUALITY ACCEPTABLE.	0.8	3.89897	0.8	3.89897			13	Entered	71	Female	03NOV16	266	Placebo	<250 mg/day	No	Yes	<250 mg/day	No	Yes	Yes	Yes	Yes
Visit 5	3T		Yes	13_014	27APR17	27APR2017	28APR17	28APR2017	Week 24	MILD BREATHING/MOTION ARTIFACT IS PRESENT.	0.7	1.78522	0.8	3.89897	-0.1	-2.11375	13	Entered	71	Female	03NOV16	266	Placebo	<250 mg/day	No	Yes	<250 mg/day	No	Yes	Yes	Yes	Yes
Visit 2	3T		Yes	13_015	31OCT16	31OCT2016	31OCT16	31OCT2016	Baseline	COMPLETE ANATOMIC COVERAGE PRESENT. SLIGHT BREATHING AND MOVEMENT ARTIFACTS NOTED. SCAN TECHNICAL QUALITY ACCEPTABLE.	20.9	14.8502	20.9	14.8502			13	Entered	75	Male	03NOV16	264	MF4637	<250 mg/day	No	Yes	<250 mg/day	No	Yes	Yes	Yes	Yes
Visit 5	3T		Yes	13_015	27APR17	27APR2017	28APR17	28APR2017	Week 24	COMPLETE ANATOMIC COVERAGE PRESENT.SLIGHT BREATHING AND MOVEMENT ARTIFACTS NOTED. SCAN TECHNICAL QUALITY ACCEPTABLE.	20.2	17.0477	20.9	14.8502	-0.7	2.19757	13	Entered	75	Male	03NOV16	264	MF4637	<250 mg/day	No	Yes	<250 mg/day	No	Yes	Yes	Yes	Yes
Visit 2	3T		Yes	13_016	27OCT16	27OCT2016	01NOV16	01NOV2016	Baseline	COMPLETE ANATOMIC COVERAGE PRESENT. SLIGHT BREATHING AND MOVEMENT ARTIFACTS NOTED. SCAN TECHNICAL QUALITY ACCEPTABLE.	3.3	9.95478	3.3	9.95478			13	Entered	70	Female	28OCT16	163	Placebo	<250 mg/day	No	Yes	>=250 mg/day	No	Yes	Yes	Yes	Yes
Visit 5	3T		Yes	13_016	11APR17	11APR2017	11APR17	11APR2017	Week 24	SLIGHT BREATHING ARTIFACT IS PRESENT.	4.7	8.85511	3.3	9.95478	1.4	-1.09967	13	Entered	70	Female	28OCT16	163	Placebo	<250 mg/day	No	Yes	>=250 mg/day	No	Yes	Yes	Yes	Yes
Visit 2	3T		Yes	13_017	31OCT16	31OCT2016	31OCT16	31OCT2016	Baseline	COMPLETE ANATOMIC COVERAGE PRESENT. SLIGHT BREATHING AND MOVEMENT ARTIFACTS NOTED. SCAN TECHNICAL QUALITY ACCEPTABLE.	4.1	31.3539	4.1	31.3539			13	Entered	52	Female	03NOV16	265	MF4637	<250 mg/day	Yes	Yes	>=250 mg/day	No	Yes	Yes	Yes	Yes
Visit 5	3T		Yes	13_017	18APR17	18APR2017	18APR17	18APR2017	Week 24	COMPLETE ANATOMIC COVERAGE PRESENT.SLIGHT BREATHING AND MOVEMENT ARTIFACTS NOTED. SCAN TECHNICAL QUALITY ACCEPTABLE.	8	51.8606	4.1	31.3539	3.9	20.5067	13	Entered	52	Female	03NOV16	265	MF4637	<250 mg/day	Yes	Yes	>=250 mg/day	No	Yes	Yes	Yes	Yes
Visit 2	3T		Yes	13_019	22NOV16	22NOV2016	22NOV16	22NOV2016	Baseline	COMPLETE ANATOMIC COVERAGE PRESENT.SLIGHT BREATHING AND MOVEMENT ARTIFACTS NOTED. SCAN TECHNICAL QUALITY ACCEPTABLE.	15.6	30.7105	15.6	30.7105			13	Entered	47	Female	23NOV16	278	Placebo	<250 mg/day	No	No	<250 mg/day	No	Yes	Yes	Yes	Yes
Visit 5	3T		Yes	13_019	10MAY17	10MAY2017	10MAY17	10MAY2017	Week 24	COMPLETE ANATOMIC COVERAGE PRESENT.SLIGHT BREATHING AND MOVEMENT ARTIFACTS NOTED. SCAN TECHNICAL QUALITY ACCEPTABLE.	12.5	33.6943	15.6	30.7105	-3.1	2.98378	13	Entered	47	Female	23NOV16	278	Placebo	<250 mg/day	No	No	<250 mg/day	No	Yes	Yes	Yes	Yes
Visit 2	3T		Yes	13_020	16NOV16	16NOV2016	16NOV16	16NOV2016	Baseline	COMPLETE ANATOMIC COVERAGE PRESENT. SLIGHT BREATHING AND MOVEMENT ARTIFACTS NOTED. SCAN TECHNICAL QUALITY ACCEPTABLE.	9.9	40.9088	9.9	40.9088			13	Entered	55	Male	17NOV16	277	Placebo	<250 mg/day	No	No	<250 mg/day	No	Yes	Yes	Yes	Yes
Visit 5	3T		Yes	13_020	09MAY17	09MAY2017	09MAY17	09MAY2017	Week 24	COMPLETE ANATOMIC COVERAGE PRESENT. SLIGHT BREATHING AND MOVEMENT ARTIFACTS NOTED. SCAN TECHNICAL QUALITY ACCEPTABLE.	17.1	44.4457	9.9	40.9088	7.2	3.53685	13	Entered	55	Male	17NOV16	277	Placebo	<250 mg/day	No	No	<250 mg/day	No	Yes	Yes	Yes	Yes
Visit 2	1.5 Tesla (T)		Yes	14_001	25OCT16	25OCT2016	25OCT16	25OCT2016	Baseline	COMPLETE ANATOMIC COVERAGE PRESENT. SLIGHT BREATHING AND MOVEMENT ARTIFACTS NOTED. SCAN TECHNICAL QUALITY ACCEPTABLE.	20.6	50.7788	20.6	50.7788			14	Entered	61	Male	25OCT16	185	Placebo	>=250 mg/day	No	Yes	>=250 mg/day	No	Yes	Yes	Yes	Yes
Visit 5	1.5 Tesla (T)		Yes	14_001	13APR17	13APR2017	13MAY17	13MAY2017	Week 24	SOME ARTIFACT IS PRESENT. DATA IS STILL FELT TO EVALUABLE.	16.9	39.1785	20.6	50.7788	-3.7	-11.6003	14	Entered	61	Male	25OCT16	185	Placebo	>=250 mg/day	No	Yes	>=250 mg/day	No	Yes	Yes	Yes	Yes
Visit 2	1.5 Tesla (T)		Yes	14_002	12OCT16	12OCT2016	12OCT16	12OCT2016	Baseline	MILD ARTIFACT IS PRESENT.	8.9	23.3012	8.9	23.3012			14	Entered	44	Female	12OCT16	208	MF4637	<250 mg/day	No	Yes	>=250 mg/day	No	Yes	Yes	Yes	Yes
Visit 5	1.5 Tesla (T)		Yes	14_002	24MAR17	24MAR2017	24MAR17	24MAR2017	Week 24		8.2	12.5858	8.9	23.3012	-0.7	-10.7154	14	Entered	44	Female	12OCT16	208	MF4637	<250 mg/day	No	Yes	>=250 mg/day	No	Yes	Yes	Yes	Yes
Visit 2	1.5 Tesla (T)		Yes	14_010	03NOV16	03NOV2016	03NOV16	03NOV2016	Baseline	LIVER FAT FRACTION ANALYSIS: COMPLETE ANATOMIC COVERAGE PRESENT. BREATHING AND MOTION ARTIFACTS NOTED.	29.3	3.9941	29.3	3.9941			14	Early Termination	61	Female		184	MF4637	<250 mg/day	No	No	>=250 mg/day	No	No	Yes	No	No
Visit 2	1.5 Tesla (T)		Yes	14_012	15NOV16	15NOV2016	15NOV16	15NOV2016	Baseline	LIVER FAT FRACTION ANALYSIS: COMPLETE ANATOMIC COVERAGE PRESENT. BREATHING AND MOTION ARTIFACTS NOTED.	24.5	36.6529	24.5	36.6529			14	Early Termination	34	Male	15NOV16	186	Placebo	<250 mg/day	No	No	>=250 mg/day	No	Yes	Yes	Yes	Yes
Visit 2	1.5 Tesla (T)		Yes	14_014	17NOV16	17NOV2016	17NOV16	17NOV2016	Baseline	COMPLETE ANATOMIC COVERAGE PRESENT. SLIGHT BREATHING AND MOVEMENT ARTIFACTS NOTED. SCAN TECHNICAL QUALITY ACCEPTABLE.	12.2	12.5925	12.2	12.5925			14	Entered	33	Female	16NOV16	187	MF4637	<250 mg/day	No	No	>=250 mg/day	No	Yes	Yes	Yes	Yes
Visit 5	1.5 Tesla (T)		Yes	14_014	01MAY17	01MAY2017	01MAY17	01MAY2017	Week 24	COMPLETE ANATOMIC COVERAGE PRESENT. SLIGHT BREATHING AND MOVEMENT ARTIFACTS NOTED. SCAN TECHNICAL QUALITY ACCEPTABLE.	7.5	9.07924	12.2	12.5925	-4.7	-3.51328	14	Entered	33	Female	16NOV16	187	MF4637	<250 mg/day	No	No	>=250 mg/day	No	Yes	Yes	Yes	Yes
Visit 2	1.5 Tesla (T)		Yes	14_016	30NOV16	30NOV2016	30NOV16	30NOV2016	Baseline	COMPLETE ANATOMIC COVERAGE PRESENT. SLIGHT BREATHING AND MOVEMENT ARTIFACTS NOTED. SCAN TECHNICAL QUALITY ACCEPTABLE.	5	0.27199	5	0.27199			14	Entered	51	Female	01DEC16	209	Placebo	<250 mg/day	No	No	<250 mg/day	No	Yes	Yes	Yes	Yes
Visit 5	1.5 Tesla (T)		Yes	14_016	19MAY17	19MAY2017	19MAY17	19MAY2017	Week 24		1.7	0.370546	5	0.27199	-3.3	0.0985563	14	Entered	51	Female	01DEC16	209	Placebo	<250 mg/day	No	No	<250 mg/day	No	Yes	Yes	Yes	Yes
				14_018					Baseline	COMPLETE ANATOMIC COVERAGE PRESENT. SLIGHT BREATHING AND MOVEMENT ARTIFACTS NOTED. SCAN TECHNICAL QUALITY ACCEPTABLE.	14.5	14.3893	14.5	14.3893			14	Entered	25	Female	05DEC16	210	MF4637	>=250 mg/day	No	No	>=250 mg/day	No	Yes	Yes	Yes	Yes
Visit 5	1.5 Tesla (T)		Yes	14_018	25MAY17	25MAY2017	25MAY17	25MAY2017	Week 24	COMPLETE ANATOMIC COVERAGE PRESENT.MODERATE BREATHING AND MOTION ARTIFACTS NOTED.	13.6	25.4299	14.5	14.3893	-0.9	11.0406	14	Entered	25	Female	05DEC16	210	MF4637	>=250 mg/day	No	No	>=250 mg/day	No	Yes	Yes	Yes	Yes
Visit 2	1.5 Tesla (T)		Yes	14_019	02DEC16	02DEC2016	02DEC16	02DEC2016	Baseline	LIVER FAT FRACTION ANALYSIS: COMPLETE ANATOMIC COVERAGE PRESENT. BREATHING AND MOTION ARTIFACTS NOTED.	10.4	37.7016	10.4	37.7016			14	Entered	32	Male	03DEC16	211	Placebo	<250 mg/day	No	Yes	<250 mg/day	No	Yes	Yes	Yes	Yes
Visit 5	1.5 Tesla (T)		Yes	14_019	18MAY17	18MAY2017	18MAY17	18MAY2017	Week 24	COMPLETE ANATOMIC COVERAGE PRESENT. BREATHING AND MOTION ARTIFACTS NOTED.	6.8	30.4537	10.4	37.7016	-3.6	-7.24793	14	Entered	32	Male	03DEC16	211	Placebo	<250 mg/day	No	Yes	<250 mg/day	No	Yes	Yes	Yes	Yes
Visit 2	3T		Yes	15_002	24SEP16	24SEP2016	27SEP16	27SEP2016	Baseline	COMPLETE ANATOMIC COVERAGE PRESENT.SLIGHT BREATHING AND MOVEMENT ARTIFACTS NOTED. SCAN TECHNICAL QUALITY ACCEPTABLE.	8.7	46.4849	8.7	46.4849			15	Entered	67	Male	27SEP16	149	Placebo	<250 mg/day	No	No	<250 mg/day	No	Yes	Yes	Yes	Yes
Visit 5	3T		Yes	15_002	06MAR17	06MAR2017	06MAR17	06MAR2017	Week 24	COMPLETE ANATOMIC COVERAGE PRESENT.SLIGHT BREATHING AND MOVEMENT ARTIFACTS NOTED. SCAN TECHNICAL QUALITY ACCEPTABLE.	7.3	36.2149	8.7	46.4849	-1.4	-10.27	15	Entered	67	Male	27SEP16	149	Placebo	<250 mg/day	No	No	<250 mg/day	No	Yes	Yes	Yes	Yes
Visit 2	3T		Yes	15_005	24SEP16	24SEP2016	24SEP16	24SEP2016	Baseline	COMPLETE ANATOMIC COVERAGE PRESENT. SLIGHT BREATHING AND MOVEMENT ARTIFACTS NOTED. SCAN TECHNICAL QUALITY ACCEPTABLE.	13.7	26.4601	13.7	26.4601			15	Entered	58	Male	28SEP16	150	Placebo	<250 mg/day	No	No	>=250 mg/day	No	Yes	Yes	Yes	Yes
Visit 5	3T		Yes	15_005	13MAR17	13MAR2017	14MAR17	14MAR2017	Week 24	COMPLETE ANATOMIC COVERAGE PRESENT. MILD BREATHING AND MOTION ARTIFACTS NOTED.	26.8	16.1728	13.7	26.4601	13.1	-10.2873	15	Entered	58	Male	28SEP16	150	Placebo	<250 mg/day	No	No	>=250 mg/day	No	Yes	Yes	Yes	Yes
Visit 2	3T		Yes	15_006	24SEP16	24SEP2016	24SEP16	24SEP2016	Baseline	LIVER FAT FRACTION ANALYSIS: COMPLETE ANATOMIC COVERAGE PRESENT. BREATHING AND MOTION ARTIFACTS NOTED.	3.1	28.1665	3.1	28.1665			15	Entered	69	Male	27SEP16	148	MF4637	<250 mg/day	No	No	>=250 mg/day	No	Yes	Yes	Yes	Yes
Visit 5	3T		Yes	15_006	13MAR17	13MAR2017	14MAR17	14MAR2017	Week 24	COMPLETE ANATOMIC COVERAGE PRESENT. MILD TO MODERATE BREATHING AND MOTION ARTIFACTS NOTED.	7.3	27.5142	3.1	28.1665	4.2	-0.652304	15	Entered	69	Male	27SEP16	148	MF4637	<250 mg/day	No	No	>=250 mg/day	No	Yes	Yes	Yes	Yes
Visit 2	3T		Yes	15_007	24SEP16	24SEP2016	24SEP16	24SEP2016	Baseline	COMPLETE ANATOMIC COVERAGE PRESENT. SLIGHT BREATHING AND MOVEMENT ARTIFACTS NOTED. SCAN TECHNICAL QUALITY ACCEPTABLE.	3.4	8.9955	3.4	8.9955			15	Entered	74	Male	29SEP16	236	Placebo	<250 mg/day	No	No	>=250 mg/day	No	Yes	Yes	Yes	Yes
Visit 5	3T		Yes	15_007	13MAR17	13MAR2017	14MAR17	14MAR2017	Week 24	AT LEAST MODERATE ARTIFACT IS PRESENT. ROI'S PLACED IN LEAST AFFECTED SEGMENTS.	4.7	3.73568	3.4	8.9955	1.3	-5.25982	15	Entered	74	Male	29SEP16	236	Placebo	<250 mg/day	No	No	>=250 mg/day	No	Yes	Yes	Yes	Yes
Visit 2	3T		Yes	15_008	24SEP16	24SEP2016	24SEP16	24SEP2016	Baseline	COMPLETE ANATOMIC COVERAGE PRESENT.SLIGHT BREATHING AND MOVEMENT ARTIFACTS NOTED. SCAN TECHNICAL QUALITY ACCEPTABLE.	7	16.9551	7	16.9551			15	Entered	55	Male	28SEP16	151	MF4637	<250 mg/day	No	No	<250 mg/day	No	Yes	Yes	Yes	Yes
Visit 5	3T		Yes	15_008	15MAR17	15MAR2017	15MAR17	15MAR2017	Week 24	COMPLETE ANATOMIC COVERAGE PRESENT.SLIGHT BREATHING AND MOVEMENT ARTIFACTS NOTED. SCAN TECHNICAL QUALITY ACCEPTABLE.	7.3	37.5923	7	16.9551	0.3	20.6372	15	Entered	55	Male	28SEP16	151	MF4637	<250 mg/day	No	No	<250 mg/day	No	Yes	Yes	Yes	Yes
Visit 2	3T		Yes	15_009	04OCT16	04OCT2016	04OCT16	04OCT2016	Baseline	COMPLETE ANATOMIC COVERAGE PRESENT. SLIGHT BREATHING AND MOVEMENT ARTIFACTS NOTED. SCAN TECHNICAL QUALITY ACCEPTABLE.	4.8	7.76135	4.8	7.76135			15	Entered	70	Female	10OCT16	237	MF4637	<250 mg/day	No	No	<250 mg/day	No	Yes	Yes	Yes	Yes
Visit 5	1.5 Tesla (T)		Yes	15_009	28MAR17	28MAR2017	29MAR17	29MAR2017	Week 24	COMPLETE ANATOMIC COVERAGE PRESENT. SLIGHT BREATHING AND MOVEMENT ARTIFACTS NOTED. SCAN TECHNICAL QUALITY ACCEPTABLE.	3.7	8.30241	4.8	7.76135	-1.1	0.541056	15	Entered	70	Female	10OCT16	237	MF4637	<250 mg/day	No	No	<250 mg/day	No	Yes	Yes	Yes	Yes
Visit 2	3T		Yes	15_010	04OCT16	04OCT2016	04OCT16	04OCT2016	Baseline	COMPLETE ANATOMIC COVERAGE PRESENT. MILD BREATHING AND MOTION ARTIFACTS NOTED.	21.6	22.7576	21.6	22.7576			15	Entered	64	Female	11OCT16	238	Placebo	<250 mg/day	No	No	<250 mg/day	No	Yes	Yes	Yes	Yes
Visit 5	1.5 Tesla (T)		Yes	15_010	30MAR17	30MAR2017	31MAR17	31MAR2017	Week 24	COMPLETE ANATOMIC COVERAGE PRESENT. MILD BREATHING AND MOTION ARTIFACTS NOTED.	17.7	20.2085	21.6	22.7576	-3.9	-2.54913	15	Entered	64	Female	11OCT16	238	Placebo	<250 mg/day	No	No	<250 mg/day	No	Yes	Yes	Yes	Yes
Visit 2	3T		Yes	15_011	07OCT16	07OCT2016	07OCT16	07OCT2016	Baseline	MILD TO MODERATE BREATHING ARTIFACT IS PRESENT.	19.3	26.2371	19.3	26.2371			15	Entered	66	Male	13OCT16	240	Placebo	<250 mg/day	No	No	<250 mg/day	No	Yes	Yes	Yes	Yes
Visit 5	1.5 Tesla (T)		Yes	15_011	28MAR17	28MAR2017	29MAR17	29MAR2017	Week 24	MINIMAL BREATHING ARTIFACT.	19.7	33.9982	19.3	26.2371	0.4	7.7611	15	Entered	66	Male	13OCT16	240	Placebo	<250 mg/day	No	No	<250 mg/day	No	Yes	Yes	Yes	Yes
Visit 2	3T		Yes	15_012	14OCT16	14OCT2016	14OCT16	14OCT2016	Baseline	COMPLETE ANATOMIC COVERAGE PRESENT.BREATHING AND MOVEMENT ARTIFACTS NOTED.	12.9	1.78048	12.9	1.78048			15	Entered	54	Female	19OCT16	241	Placebo	<250 mg/day	No	No	<250 mg/day	No	Yes	Yes	Yes	Yes
Visit 5	3T		Yes	15_012	03APR17	03APR2017	04APR17	04APR2017	Week 24	COMPLETE ANATOMIC COVERAGE PRESENT.SLIGHT BREATHING AND MOVEMENT ARTIFACTS NOTED. SCAN TECHNICAL QUALITY ACCEPTABLE.	9.9	3.6405	12.9	1.78048	-3	1.86002	15	Entered	54	Female	19OCT16	241	Placebo	<250 mg/day	No	No	<250 mg/day	No	Yes	Yes	Yes	Yes
Visit 2	3T		Yes	15_013	13OCT16	13OCT2016	13OCT16	13OCT2016	Baseline	COMPLETE ANATOMIC COVERAGE PRESENT. SLIGHT BREATHING AND MOVEMENT ARTIFACTS NOTED. SCAN TECHNICAL QUALITY ACCEPTABLE.	14.7	48.4723	14.7	48.4723			15	Entered	58	Female	13OCT16	242	MF4637	<250 mg/day	No	No	>=250 mg/day	No	Yes	Yes	Yes	Yes
Visit 5	1.5 Tesla (T)		Yes	15_013	27MAR17	27MAR2017	28MAR17	28MAR2017	Week 24	COMPLETE ANATOMIC COVERAGE PRESENT.SLIGHT BREATHING AND MOVEMENT ARTIFACTS NOTED. SCAN TECHNICAL QUALITY ACCEPTABLE.	11.3	22.2418	14.7	48.4723	-3.4	-26.2306	15	Entered	58	Female	13OCT16	242	MF4637	<250 mg/day	No	No	>=250 mg/day	No	Yes	Yes	Yes	Yes
Visit 2	3T		Yes	15_014	13OCT16	13OCT2016	13OCT16	13OCT2016	Baseline	COMPLETE ANATOMIC COVERAGE PRESENT.SLIGHT BREATHING AND MOVEMENT ARTIFACTS NOTED. SCAN TECHNICAL QUALITY ACCEPTABLE.	24.5	46.7384	24.5	46.7384			15	Entered	55	Female	13OCT16	239	MF4637	<250 mg/day	No	No	>=250 mg/day	No	Yes	Yes	Yes	Yes
Visit 5	3T		Yes	15_014	30MAR17	30MAR2017	30MAR17	30MAR2017	Week 24	COMPLETE ANATOMIC COVERAGE PRESENT. SLIGHT BREATHING AND MOVEMENT ARTIFACTS NOTED. SCAN TECHNICAL QUALITY ACCEPTABLE.	13.9	35.6928	24.5	46.7384	-10.6	-11.0457	15	Entered	55	Female	13OCT16	239	MF4637	<250 mg/day	No	No	>=250 mg/day	No	Yes	Yes	Yes	Yes
Visit 2	3T		Yes	15_015	09NOV16	09NOV2016	09NOV16	09NOV2016	Baseline	COMPLETE ANATOMIC COVERAGE PRESENT. MODERATE BREATHING AND MOVEMENT ARTIFACTS NOTED.	9.8	14.0105	9.8	14.0105			15	Entered	81	Female	09NOV16	268	MF4637	<250 mg/day	No	No	<250 mg/day	No	Yes	Yes	Yes	Yes
Visit 5	1.5 Tesla (T)		Yes	15_015	26APR17	26APR2017	27APR17	27APR2017	Week 24	COMPLETE ANATOMIC COVERAGE PRESENT. MODERATE BREATHING AND MOTION ARTIFACTS NOTED.YOUR_LOGIN	8.2	12.0252	9.8	14.0105	-1.6	-1.98522	15	Entered	81	Female	09NOV16	268	MF4637	<250 mg/day	No	No	<250 mg/day	No	Yes	Yes	Yes	Yes
Visit 2	3T		Yes	15_016	09NOV16	09NOV2016	09NOV16	09NOV2016	Baseline	COMPLETE ANATOMIC COVERAGE PRESENT.SLIGHT BREATHING AND MOVEMENT ARTIFACTS NOTED. SCAN TECHNICAL QUALITY ACCEPTABLE.	19	10.0446	19	10.0446			15	Entered	77	Female	09NOV16	243	MF4637	<250 mg/day	Yes	No	>=250 mg/day	No	Yes	Yes	Yes	Yes
Visit 5	1.5 Tesla (T)		Yes	15_016	27APR17	27APR2017	27APR17	27APR2017	Week 24	COMPLETE ANATOMIC COVERAGE PRESENT. MILD BREATHING AND MOTION ARTIFACTS NOTED.	22	6.89271	19	10.0446	3	-3.15186	15	Entered	77	Female	09NOV16	243	MF4637	<250 mg/day	Yes	No	>=250 mg/day	No	Yes	Yes	Yes	Yes
Visit 2	3T		Yes	15_017	09NOV16	09NOV2016	09NOV16	09NOV2016	Baseline	COMPLETE ANATOMIC COVERAGE PRESENT. SLIGHT BREATHING AND MOVEMENT ARTIFACTS NOTED. SCAN TECHNICAL QUALITY ACCEPTABLE.	14.9	34.0631	14.9	34.0631			15	Entered	62	Male	10NOV16	270	Placebo	<250 mg/day	No	No	<250 mg/day	No	Yes	Yes	Yes	No
Visit 5		Uncontrollable claustrophobia	No	15_017					Week 24			37.8319	14.9	34.0631		3.76882	15	Entered	62	Male	10NOV16	270	Placebo	<250 mg/day	No	No	<250 mg/day	No	Yes	Yes	Yes	No
Visit 2	3T		Yes	15_018	14NOV16	14NOV2016	14NOV16	14NOV2016	Baseline	COMPLETE ANATOMIC COVERAGE PRESENT.SLIGHT BREATHING AND MOVEMENT ARTIFACTS NOTED. SCAN TECHNICAL QUALITY ACCEPTABLE.	17.7	7.90259	17.7	7.90259			15	Entered	57	Male	15NOV16	269	MF4637	<250 mg/day	No	No	<250 mg/day	No	Yes	Yes	Yes	Yes
Visit 5	1.5 Tesla (T)		Yes	15_018	28APR17	28APR2017	28APR17	28APR2017	Week 24	COMPLETE ANATOMIC COVERAGE PRESENT. MILD BREATHING AND MOTION ARTIFACTS NOTED.	16.6	8.24879	17.7	7.90259	-1.1	0.346202	15	Entered	57	Male	15NOV16	269	MF4637	<250 mg/day	No	No	<250 mg/day	No	Yes	Yes	Yes	Yes
Visit 2	3T		Yes	15_019	16NOV16	16NOV2016	16NOV16	16NOV2016	Baseline	COMPLETE ANATOMIC COVERAGE PRESENT.SLIGHT BREATHING AND MOVEMENT ARTIFACTS NOTED. SCAN TECHNICAL QUALITY ACCEPTABLE.	23.7	22.3207	23.7	22.3207			15	Entered	38	Female	17NOV16	271	Placebo	<250 mg/day	No	No	>=250 mg/day	No	Yes	Yes	Yes	Yes
Visit 5	1.5 Tesla (T)		Yes	15_019	01MAY17	01MAY2017	01MAY17	01MAY2017	Week 24	MILD BREATHING ARTIFACT IS PRESENT	20.1	26.13	23.7	22.3207	-3.6	3.80927	15	Entered	38	Female	17NOV16	271	Placebo	<250 mg/day	No	No	>=250 mg/day	No	Yes	Yes	Yes	Yes
Visit 2	3T		Yes	15_020	21NOV16	21NOV2016	21NOV16	21NOV2016	Baseline			11.3507		11.3507			15	Early Termination	65	Female	30NOV16	272	MF4637	<250 mg/day	No	No	>=250 mg/day	No	Yes	Yes	Yes	Yes
Visit 2	3T		Yes	15_021	30NOV16	30NOV2016	30NOV16	30NOV2016	Baseline	COMPLETE ANATOMIC COVERAGE PRESENT.SLIGHT BREATHING AND MOVEMENT ARTIFACTS NOTED. SCAN TECHNICAL QUALITY ACCEPTABLE.	10.4	79.9119	10.4	79.9119			15	Entered	41	Male	02DEC16	273	Placebo	<250 mg/day	No	No	>=250 mg/day	No	Yes	Yes	Yes	Yes
Visit 5	1.5 Tesla (T)		Yes	15_021	20MAY17	20MAY2017	20MAY17	20MAY2017	Week 24	MOTION ARTIFACTS ARE PRESENT.	9.3	48.6882	10.4	79.9119	-1.1	-31.2237	15	Entered	41	Male	02DEC16	273	Placebo	<250 mg/day	No	No	>=250 mg/day	No	Yes	Yes	Yes	Yes
Visit 2	3T		Yes	15_022	09DEC16	09DEC2016	09DEC16	09DEC2016	Baseline	COMPLETE ANATOMIC COVERAGE PRESENT.SLIGHT BREATHING AND MOVEMENT ARTIFACTS NOTED. SCAN TECHNICAL QUALITY ACCEPTABLE.	20.7	28.8415	20.7	28.8415			15	Entered	48	Male	09DEC16	274	Placebo	<250 mg/day	No	No	<250 mg/day	No	Yes	Yes	Yes	Yes
Visit 5	1.5 Tesla (T)		Yes	15_022	23MAY17	23MAY2017	23MAY17	23MAY2017	Week 24	COMPLETE ANATOMIC COVERAGE PRESENT. MODERATE BREATHING AND MOVEMENT ARTIFACTS NOTED.	4.3	10.5962	20.7	28.8415	-16.4	-18.2453	15	Entered	48	Male	09DEC16	274	Placebo	<250 mg/day	No	No	<250 mg/day	No	Yes	Yes	Yes	Yes
Visit 2	3T		Yes	15_023	05DEC16	05DEC2016	05DEC16	05DEC2016	Baseline	COMPLETE ANATOMIC COVERAGE PRESENT.SLIGHT BREATHING AND MOVEMENT ARTIFACTS NOTED. SCAN TECHNICAL QUALITY ACCEPTABLE.	17.2	6.3951	17.2	6.3951			15	Entered	58	Female	06DEC16	275	MF4637	<250 mg/day	No	No	>=250 mg/day	No	Yes	Yes	Yes	Yes
Visit 5	1.5 Tesla (T)		Yes	15_023	23MAY17	23MAY2017	23MAY17	23MAY2017	Week 24	COMPLETE ANATOMIC COVERAGE PRESENT. MILD TO MODERATE BREATHING AND MOTION ARTIFACTS NOTED.	17.9	9.9511	17.2	6.3951	0.7	3.556	15	Entered	58	Female	06DEC16	275	MF4637	<250 mg/day	No	No	>=250 mg/day	No	Yes	Yes	Yes	Yes
Visit 2	1.5 Tesla (T)		Yes	16_001	28OCT16	28OCT2016	02NOV16	02NOV2016	Baseline	COMPLETE ANATOMIC COVERAGE PRESENT. SLIGHT BREATHING AND MOVEMENT ARTIFACTS NOTED. SCAN TECHNICAL QUALITY ACCEPTABLE.	17.7	20.8727	17.7	20.8727			16	Early Termination	53	Male	31OCT16	152	Placebo	<250 mg/day	No	No	<250 mg/day	No	Yes	Yes	Yes	Yes
Visit 2	1.5 Tesla (T)		Yes	16_002	28OCT16	28OCT2016	02NOV16	02NOV2016	Baseline	COMPLETE ANATOMIC COVERAGE PRESENT. BREATHING AND MOVEMENT ARTIFACTS NOTED WITH LOW SIGNAL TO NOISE RATIO.	5.9	8.18052	5.9	8.18052			16	Early Termination	53	Male	03NOV16	154	MF4637	<250 mg/day	No	No	<250 mg/day	No	Yes	Yes	Yes	Yes
Visit 2	1.5 Tesla (T)		Yes	16_003	01NOV16	01NOV2016	02NOV16	02NOV2016	Baseline	COMPLETE ANATOMIC COVERAGE PRESENT.SLIGHT BREATHING AND MOVEMENT ARTIFACTS NOTED. SCAN TECHNICAL QUALITY ACCEPTABLE.	23.8	8.94744	23.8	8.94744			16	Entered	59	Male	03NOV16	153	Placebo	>=250 mg/day	No	No	>=250 mg/day	No	Yes	Yes	Yes	Yes
Visit 5	1.5 Tesla (T)		Yes	16_003	26APR17	26APR2017	27APR17	27APR2017	Week 24	COMPLETE ANATOMIC COVERAGE PRESENT.SLIGHT BREATHING AND MOVEMENT ARTIFACTS NOTED. SCAN TECHNICAL QUALITY ACCEPTABLE.	29.3	18.4345	23.8	8.94744	5.5	9.48702	16	Entered	59	Male	03NOV16	153	Placebo	>=250 mg/day	No	No	>=250 mg/day	No	Yes	Yes	Yes	Yes
Visit 2		Uncontrollable claustrophobia	No	16_004					Baseline								16	Screen Failure	50	Male								Yes	No	No	No	No
Visit 2	1.5 Tesla (T)		Yes	16_005	07NOV16	07NOV2016	07NOV16	07NOV2016	Baseline	COMPLETE ANATOMIC COVERAGE PRESENT. BREATHING AND MOVEMENT ARTIFACTS NOTED WITH POOR SIGNAL TO NOISE RATIO.	2.2	1.13207	2.2	1.13207			16	Entered	60	Male	12NOV16	155	MF4637	<250 mg/day	No	No	<250 mg/day	No	Yes	Yes	Yes	Yes
Visit 5	1.5 Tesla (T)		Yes	16_005	21APR17	21APR2017	27APR17	27APR2017	Week 24	COMPLETE ANATOMIC COVERAGE PRESENT. BREATHING AND MOVEMENT ARTIFACTS NOTED WITH POOR SIGNAL TO NOISE RATIO.	1.7	1.08463	2.2	1.13207	-0.5	-0.0474457	16	Entered	60	Male	12NOV16	155	MF4637	<250 mg/day	No	No	<250 mg/day	No	Yes	Yes	Yes	Yes
Visit 2	1.5 Tesla (T)		Yes	16_007	22NOV16	22NOV2016	22NOV16	22NOV2016	Baseline	COMPLETE ANATOMIC COVERAGE PRESENT.SLIGHT BREATHING AND MOVEMENT ARTIFACTS NOTED. SCAN TECHNICAL QUALITY ACCEPTABLE.	12.7	5.82273	12.7	5.82273			16	Entered	57	Female	28NOV16	156	Placebo	>=250 mg/day	No	No	>=250 mg/day	No	Yes	Yes	Yes	Yes
Visit 5	1.5 Tesla (T)		Yes	16_007	08MAY17	08MAY2017	15MAY17	15MAY2017	Week 24		9.2	4.68321	12.7	5.82273	-3.5	-1.13952	16	Entered	57	Female	28NOV16	156	Placebo	>=250 mg/day	No	No	>=250 mg/day	No	Yes	Yes	Yes	Yes
Visit 2	1.5 Tesla (T)		Yes	16_008	15NOV16	15NOV2016	15NOV16	15NOV2016	Baseline	COMPLETE ANATOMIC COVERAGE PRESENT. BREATHING AND MOVEMENT ARTIFACTS NOTED WITH LOW SIGNAL TO NOISE RATIO.	3.5	5.09558	3.5	5.09558			16	Entered	58	Female	18NOV16	158	MF4637	>=250 mg/day	No	No	>=250 mg/day	No	Yes	Yes	Yes	Yes
Visit 5	1.5 Tesla (T)		Yes	16_008	12MAY17	12MAY2017	15MAY17	15MAY2017	Week 24		2.9	4.44967	3.5	5.09558	-0.6	-0.645913	16	Entered	58	Female	18NOV16	158	MF4637	>=250 mg/day	No	No	>=250 mg/day	No	Yes	Yes	Yes	Yes
Visit 2	3T		Yes	17_001	07NOV16	07NOV2016	07NOV16	07NOV2016	Baseline	COMPLETE ANATOMIC COVERAGE PRESENT.SLIGHT BREATHING AND MOVEMENT ARTIFACTS NOTED. SCAN TECHNICAL QUALITY ACCEPTABLE.	30.8	38.2968	30.8	38.2968			17	Entered	71	Male	08NOV16	212	Placebo	<250 mg/day	No	No	<250 mg/day	No	Yes	Yes	Yes	Yes
Visit 5	3T		Yes	17_001	21APR17	21APR2017	21APR17	21APR2017	Week 24	COMPLETE ANATOMIC COVERAGE PRESENT. MILD TO MODERATE BREATHING AND MOTION ARTIFACTS NOTED.	24.2	24.8003	30.8	38.2968	-6.6	-13.4965	17	Entered	71	Male	08NOV16	212	Placebo	<250 mg/day	No	No	<250 mg/day	No	Yes	Yes	Yes	Yes
Visit 2	3T		Yes	17_002	09NOV16	09NOV2016	09NOV16	09NOV2016	Baseline	COMPLETE ANATOMIC COVERAGE PRESENT.SLIGHT BREATHING AND MOVEMENT ARTIFACTS NOTED. SCAN TECHNICAL QUALITY ACCEPTABLE.	22.5	7.79034	22.5	7.79034			17	Entered	70	Female	10NOV16	192	MF4637	<250 mg/day	Yes	No	<250 mg/day	No	Yes	Yes	Yes	Yes
Visit 5	3T		Yes	17_002	21APR17	21APR2017	21APR17	21APR2017	Week 24	COMPLETE ANATOMIC COVERAGE PRESENT. MILD TO MODERATE BREATHING AND MOTION ARTIFACTS NOTED.	6.2	3.74126	22.5	7.79034	-16.3	-4.04907	17	Entered	70	Female	10NOV16	192	MF4637	<250 mg/day	Yes	No	<250 mg/day	No	Yes	Yes	Yes	Yes
Visit 2	3T		Yes	17_003	09NOV16	09NOV2016	09NOV16	09NOV2016	Baseline	COMPLETE ANATOMIC COVERAGE PRESENT. SLIGHT BREATHING AND MOVEMENT ARTIFACTS NOTED. SCAN TECHNICAL QUALITY ACCEPTABLE.	4.9	22.7436	4.9	22.7436			17	Entered	62	Female	10NOV16	193	MF4637	>=250 mg/day	Yes	No	<250 mg/day	No	Yes	Yes	Yes	Yes
Visit 5	3T		Yes	17_003	26APR17	26APR2017	26APR17	26APR2017	Week 24	COMPLETE ANATOMIC COVERAGE PRESENT. MILD TO MODERATE BREATHING AND MOTION ARTIFACTS NOTED.	7.7	23.585	4.9	22.7436	2.8	0.841371	17	Entered	62	Female	10NOV16	193	MF4637	>=250 mg/day	Yes	No	<250 mg/day	No	Yes	Yes	Yes	Yes
Visit 2	3T		Yes	17_005	14NOV16	14NOV2016	14NOV16	14NOV2016	Baseline	COMPLETE ANATOMIC COVERAGE PRESENT. SLIGHT BREATHING AND MOVEMENT ARTIFACTS NOTED. SCAN TECHNICAL QUALITY ACCEPTABLE.	12.2	12.3786	12.2	12.3786			17	Entered	65	Female	16NOV16	213	MF4637	<250 mg/day	No	No	<250 mg/day	No	Yes	Yes	Yes	Yes
Visit 5	3T		Yes	17_005	28APR17	28APR2017	28APR17	28APR2017	Week 24	COMPLETE ANATOMIC COVERAGE PRESENT. MILD TO MODERATE BREATHING AND MOVEMENT ARTIFACTS NOTED. SCAN TECHNICAL QUALITY ACCEPTABLE.	7.4	11.0522	12.2	12.3786	-4.8	-1.32642	17	Entered	65	Female	16NOV16	213	MF4637	<250 mg/day	No	No	<250 mg/day	No	Yes	Yes	Yes	Yes
Visit 2	3T		Yes	17_006	19NOV16	19NOV2016	19NOV16	19NOV2016	Baseline	COMPLETE ANATOMIC COVERAGE PRESENT.SLIGHT BREATHING AND MOVEMENT ARTIFACTS NOTED. SCAN TECHNICAL QUALITY ACCEPTABLE.	27.6	7.19308	27.6	7.19308			17	Entered	61	Female	21NOV16	194	Placebo	<250 mg/day	No	No	<250 mg/day	No	Yes	Yes	Yes	Yes
Visit 5		Ferrous metal	No	17_006					Week 24			7.69724	27.6	7.19308		0.50416	17	Entered	61	Female	21NOV16	194	Placebo	<250 mg/day	No	No	<250 mg/day	No	Yes	Yes	Yes	Yes
Visit 2	3T		Yes	17_007	19NOV16	19NOV2016	19NOV16	19NOV2016	Baseline	COMPLETE ANATOMIC COVERAGE PRESENT. BREATHING AND MOVEMENT ARTIFACTS NOTED.	16.2	9.90828	16.2	9.90828			17	Entered	61	Male	21NOV16	214	MF4637	<250 mg/day	No	No	<250 mg/day	No	Yes	Yes	Yes	Yes
Visit 5	3T		Yes	17_007	06MAY17	06MAY2017	06MAY17	06MAY2017	Week 24	COMPLETE ANATOMIC COVERAGE PRESENT.SLIGHT BREATHING AND MOVEMENT ARTIFACTS NOTED. SCAN TECHNICAL QUALITY ACCEPTABLE.	19.8	12.1067	16.2	9.90828	3.6	2.19846	17	Entered	61	Male	21NOV16	214	MF4637	<250 mg/day	No	No	<250 mg/day	No	Yes	Yes	Yes	Yes
Visit 2	3T		Yes	17_008	22NOV16	22NOV2016	22NOV16	22NOV2016	Baseline	COMPLETE ANATOMIC COVERAGE PRESENT.SLIGHT BREATHING AND MOVEMENT ARTIFACTS NOTED. SCAN TECHNICAL QUALITY ACCEPTABLE.	27.8	2.58583	27.8	2.58583			17	Entered	67	Female	25NOV16	195	Placebo	<250 mg/day	Yes	No	<250 mg/day	No	Yes	Yes	Yes	Yes
Visit 5	3T		Yes	17_008	12MAY17	12MAY2017	12MAY17	12MAY2017	Week 24	COMPLETE ANATOMIC COVERAGE PRESENT.SLIGHT BREATHING AND MOVEMENT ARTIFACTS NOTED. SCAN TECHNICAL QUALITY ACCEPTABLE.	26	5.79082	27.8	2.58583	-1.8	3.20499	17	Entered	67	Female	25NOV16	195	Placebo	<250 mg/day	Yes	No	<250 mg/day	No	Yes	Yes	Yes	Yes
Visit 2	3T		Yes	17_009	22NOV16	22NOV2016	22NOV16	22NOV2016	Baseline	COMPLETE ANATOMIC COVERAGE PRESENT.SLIGHT BREATHING AND MOVEMENT ARTIFACTS NOTED. SCAN TECHNICAL QUALITY ACCEPTABLE.	12.2	11.7353	12.2	11.7353			17	Entered	70	Male	25NOV16	215	Placebo	<250 mg/day	No	No	<250 mg/day	No	Yes	Yes	Yes	Yes
Visit 5	3T		Yes	17_009	12MAY17	12MAY2017	12MAY17	12MAY2017	Week 24	COMPLETE ANATOMIC COVERAGE PRESENT.SLIGHT BREATHING AND MOVEMENT ARTIFACTS NOTED. SCAN TECHNICAL QUALITY ACCEPTABLE.	10.6	12.9104	12.2	11.7353	-1.6	1.17508	17	Entered	70	Male	25NOV16	215	Placebo	<250 mg/day	No	No	<250 mg/day	No	Yes	Yes	Yes	Yes
Visit 2	3T		Yes	17_010	22NOV16	22NOV2016	22NOV16	22NOV2016	Baseline	COMPLETE ANATOMIC COVERAGE PRESENT.SLIGHT BREATHING AND MOVEMENT ARTIFACTS NOTED. SCAN TECHNICAL QUALITY ACCEPTABLE.	6.9	7.86269	6.9	7.86269			17	Entered	68	Female	25NOV16	230	MF4637	<250 mg/day	No	No	<250 mg/day	No	Yes	Yes	Yes	Yes
Visit 5	3T		Yes	17_010	12MAY17	12MAY2017	12MAY17	12MAY2017	Week 24	SOME BREATHING ARTIFACT IS PRESENT.	6.1	10.8596	6.9	7.86269	-0.8	2.99695	17	Entered	68	Female	25NOV16	230	MF4637	<250 mg/day	No	No	<250 mg/day	No	Yes	Yes	Yes	Yes
Visit 2	1.5 Tesla (T)		Yes	18_001	14OCT16	14OCT2016	17OCT16	17OCT2016	Baseline	COMPLETE ANATOMIC COVERAGE PRESENT.SLIGHT BREATHING AND MOVEMENT ARTIFACTS NOTED. SCAN TECHNICAL QUALITY ACCEPTABLE.	7.3	3.40881	7.3	3.40881			18	Entered	46	Female	18OCT16	220	Placebo	<250 mg/day	No	No	<250 mg/day	No	Yes	Yes	Yes	Yes
Visit 5	1.5 Tesla (T)		Yes	18_001	01APR17	01APR2017	03APR17	03APR2017	Week 24	COMPLETE ANATOMIC COVERAGE PRESENT.SLIGHT BREATHING AND MOVEMENT ARTIFACTS NOTED. SCAN TECHNICAL QUALITY ACCEPTABLE.	6.7	5.46208	7.3	3.40881	-0.6	2.05327	18	Entered	46	Female	18OCT16	220	Placebo	<250 mg/day	No	No	<250 mg/day	No	Yes	Yes	Yes	Yes
Visit 2	1.5 Tesla (T)		Yes	18_002	19OCT16	19OCT2016	20OCT16	20OCT2016	Baseline	COMPLETE ANATOMIC COVERAGE PRESENT. PHASE ENCODING MOTION AND BREATHING ARTIFACTS NOTED	17.5	37.1449	17.5	37.1449			18	Entered	52	Female	24OCT16	222	MF4637	<250 mg/day	No	No	<250 mg/day	No	Yes	Yes	Yes	Yes
Visit 5	1.5 Tesla (T)		Yes	18_002	04APR17	04APR2017	06APR17	06APR2017	Week 24	COMPLETE ANATOMIC COVERAGE PRESENT. PHASE ENCODING MOTION AND BREATHING ARTIFACTS NOTED	22.7	46.5084	17.5	37.1449	5.2	9.36351	18	Entered	52	Female	24OCT16	222	MF4637	<250 mg/day	No	No	<250 mg/day	No	Yes	Yes	Yes	Yes
Visit 2	1.5 Tesla (T)		Yes	18_003	20OCT16	20OCT2016	21OCT16	21OCT2016	Baseline	COMPLETE ANATOMIC COVERAGE PRESENT. BREATHING AND MOVEMENT ARTIFACTS NOTED.	2.4	5.738	2.4	5.738			18	Entered	55	Female	26OCT16	221	Placebo	>=250 mg/day	Yes	Yes	>=250 mg/day	No	Yes	Yes	Yes	Yes
Visit 5	1.5 Tesla (T)		Yes	18_003	03APR17	03APR2017	05APR17	05APR2017	Week 24	COMPLETE ANATOMIC COVERAGE PRESENT. SLIGHT BREATHING AND MOVEMENT ARTIFACTS NOTED. SCAN TECHNICAL QUALITY ACCEPTABLE.	2.5	5.94808	2.4	5.738	0.1	0.210079	18	Entered	55	Female	26OCT16	221	Placebo	>=250 mg/day	Yes	Yes	>=250 mg/day	No	Yes	Yes	Yes	Yes
Visit 2	3T		Yes	19_001	25OCT16	25OCT2016	27OCT16	27OCT2016	Baseline	COMPLETE ANATOMIC COVERAGE PRESENT. SLIGHT BREATHING AND MOVEMENT ARTIFACTS NOTED. SCAN TECHNICAL QUALITY ACCEPTABLE.	23.3	17.9826	23.3	17.9826			19	Entered	53	Female	28OCT16	225	Placebo	<250 mg/day	No	No	>=250 mg/day	No	Yes	Yes	Yes	Yes
Visit 5	3T		Yes	19_001	24APR17	24APR2017	24APR17	24APR2017	Week 24	MILD BREATHING ARTIFACT.	9.6	8.35837	23.3	17.9826	-13.7	-9.62422	19	Entered	53	Female	28OCT16	225	Placebo	<250 mg/day	No	No	>=250 mg/day	No	Yes	Yes	Yes	Yes
Visit 2	3T		Yes	19_002	21OCT16	21OCT2016	24OCT16	24OCT2016	Baseline	COMPLETE ANATOMIC COVERAGE PRESENT. SLIGHT BREATHING AND MOVEMENT ARTIFACTS NOTED. SCAN TECHNICAL QUALITY ACCEPTABLE.	25.9	17.7424	25.9	17.7424			19	Entered	37	Male	27OCT16	224	MF4637	<250 mg/day	No	No	<250 mg/day	No	Yes	Yes	Yes	Yes
Visit 5	3T		Yes	19_002	11MAY17	11MAY2017	12MAY17	12MAY2017	Week 24	COMPLETE ANATOMIC COVERAGE PRESENT.SLIGHT BREATHING AND MOVEMENT ARTIFACTS NOTED. SCAN TECHNICAL QUALITY ACCEPTABLE.	33.8	10.1467	25.9	17.7424	7.9	-7.5957	19	Entered	37	Male	27OCT16	224	MF4637	<250 mg/day	No	No	<250 mg/day	No	Yes	Yes	Yes	Yes
Visit 2	3T		Yes	19_004	04NOV16	04NOV2016	07NOV16	07NOV2016	Baseline	COMPLETE ANATOMIC COVERAGE PRESENT.SLIGHT BREATHING AND MOVEMENT ARTIFACTS NOTED. SCAN TECHNICAL QUALITY ACCEPTABLE.	33.6	9.00188	33.6	9.00188			19	Entered	53	Female	04NOV16	226	MF4637	<250 mg/day	No	No	>=250 mg/day	No	Yes	Yes	Yes	Yes
Visit 5	3T		Yes	19_004	08MAY17	08MAY2017	08MAY17	08MAY2017	Week 24	COMPLETE ANATOMIC COVERAGE PRESENT.SLIGHT BREATHING AND MOVEMENT ARTIFACTS NOTED. SCAN TECHNICAL QUALITY ACCEPTABLE.	30	10.8442	33.6	9.00188	-3.6	1.84229	19	Entered	53	Female	04NOV16	226	MF4637	<250 mg/day	No	No	>=250 mg/day	No	Yes	Yes	Yes	Yes
Visit 2	3T		Yes	19_005	04NOV16	04NOV2016	07NOV16	07NOV2016	Baseline	MILD BREATHING ARTIFACT.	2	5.50354	2	5.50354			19	Entered	51	Male	04NOV16	227	Placebo	<250 mg/day	No	No	<250 mg/day	No	Yes	Yes	Yes	Yes
Visit 5	3T		Yes	19_005	08MAY17	08MAY2017	08MAY17	08MAY2017	Week 24	SOME MILD BREATHING ARTIFACT IS PRESENT. SOME SLICE IMAGES ARE CORRUPTED.	1.7	3.85187	2	5.50354	-0.3	-1.65167	19	Entered	51	Male	04NOV16	227	Placebo	<250 mg/day	No	No	<250 mg/day	No	Yes	Yes	Yes	Yes
Visit 2	3T		Yes	19_007	18NOV16	18NOV2016	21NOV16	21NOV2016	Baseline	MILD BREATHING ARTIFACT IS PRESENT.	12.7	15.5739	12.7	15.5739			19	Entered	50	Male	21NOV16	289	MF4637	<250 mg/day	No	No	>=250 mg/day	No	Yes	Yes	Yes	Yes
				19_007					Week 24	MILD ARTIFACT IS PRESENT.	11.2	12.1936	12.7	15.5739	-1.5	-3.38034	19	Entered	50	Male	21NOV16	289	MF4637	<250 mg/day	No	No	>=250 mg/day	No	Yes	Yes	Yes	Yes
Visit 2	3T		Yes	19_009	18NOV16	18NOV2016	21NOV16	21NOV2016	Baseline	COMPLETE ANATOMIC COVERAGE PRESENT. MILD TO MODERATE BREATHING AND MOTION ARTIFACTS NOTED.	6.7	3.70129	6.7	3.70129			19	Entered	49	Female	21NOV16	290	Placebo	<250 mg/day	No	No	>=250 mg/day	No	Yes	Yes	Yes	Yes
				19_009					Week 24	COMPLETE ANATOMIC COVERAGE PRESENT. MILD TO MODERATE BREATHING AND MOTION ARTIFACTS NOTED.	8.9	3.65371	6.7	3.70129	2.2	-0.0475774	19	Entered	49	Female	21NOV16	290	Placebo	<250 mg/day	No	No	>=250 mg/day	No	Yes	Yes	Yes	Yes
Visit 2	3T		Yes	19_010	18NOV16	18NOV2016	21NOV16	21NOV2016	Baseline	COMPLETE ANATOMIC COVERAGE PRESENT. BREATHING AND MOVEMENT ARTIFACTS NOTED.	15.2	31.7887	15.2	31.7887			19	Entered	33	Male	21NOV16	291	MF4637	<250 mg/day	No	No	>=250 mg/day	No	Yes	Yes	Yes	Yes
				19_010					Week 24	MOTION ARTIFACTS ARE PRESENT.	14.8	11.9793	15.2	31.7887	-0.4	-19.8094	19	Entered	33	Male	21NOV16	291	MF4637	<250 mg/day	No	No	>=250 mg/day	No	Yes	Yes	Yes	Yes
Visit 2	3T		Yes	19_012	18NOV16	18NOV2016	21NOV16	21NOV2016	Baseline	COMPLETE ANATOMIC COVERAGE PRESENT. SLIGHT BREATHING AND MOVEMENT ARTIFACTS NOTED. SCAN TECHNICAL QUALITY ACCEPTABLE.	21.5	26.2078	21.5	26.2078			19	Entered	55	Female	21NOV16	288	Placebo	<250 mg/day	Yes	No	>=250 mg/day	No	Yes	Yes	Yes	Yes
				19_012					Week 24	COMPLETE ANATOMIC COVERAGE PRESENT. SLIGHT BREATHING AND MOVEMENT ARTIFACTS NOTED. SCAN TECHNICAL QUALITY ACCEPTABLE.	19.2	15.1982	21.5	26.2078	-2.3	-11.0095	19	Entered	55	Female	21NOV16	288	Placebo	<250 mg/day	Yes	No	>=250 mg/day	No	Yes	Yes	Yes	Yes
