# Supplementary material for: Evaluation of a High Concentrate Omega-3 for Correcting the Omega-3 Fatty Acid Nutritional Deficiency in Non-alcoholic Fatty Liver Disease and effects on Hepatic Steatosis (CONDIN)
Source: Preprints.org preprint supplement (doi:10.20944/preprints201807.0240.v1), 2018-07-13
Supplement: Supplementary file 13 [file PE.xlsx]

## Sheet: PE
VISIT	PETESTOT	PERESAB	PERES	PETEST	SUBJID	VISITNUM	PEYN	PEDT	CDPE	SITE	STATUS	AGE	SEX	FIRSTDT	RANDNO	TREAT	OMEGA	DIABETE	STATIN	OMEGA_C	SFFL	SAFETY	ITT	MITT	PP
Visit 2			Normal	General appearance	02_001	2	Yes	27OCT15	27OCT2015	02	Entered	57	Female	27OCT15	108	MF4637	<250 mg/day	Yes	Yes	<250 mg/day	No	Yes	Yes	Yes	Yes
Visit 2			Normal	Head, eyes, ears and nose	02_001	2	Yes	27OCT15	27OCT2015	02	Entered	57	Female	27OCT15	108	MF4637	<250 mg/day	Yes	Yes	<250 mg/day	No	Yes	Yes	Yes	Yes
Visit 2			Normal	Mouth, teeth and throat	02_001	2	Yes	27OCT15	27OCT2015	02	Entered	57	Female	27OCT15	108	MF4637	<250 mg/day	Yes	Yes	<250 mg/day	No	Yes	Yes	Yes	Yes
Visit 2			Not done	Neck and thyroid	02_001	2	Yes	27OCT15	27OCT2015	02	Entered	57	Female	27OCT15	108	MF4637	<250 mg/day	Yes	Yes	<250 mg/day	No	Yes	Yes	Yes	Yes
Visit 2			Not done	Chest	02_001	2	Yes	27OCT15	27OCT2015	02	Entered	57	Female	27OCT15	108	MF4637	<250 mg/day	Yes	Yes	<250 mg/day	No	Yes	Yes	Yes	Yes
Visit 2			Normal	Heart	02_001	2	Yes	27OCT15	27OCT2015	02	Entered	57	Female	27OCT15	108	MF4637	<250 mg/day	Yes	Yes	<250 mg/day	No	Yes	Yes	Yes	Yes
Visit 2		NCS obese	Abnormal	Abdomen	02_001	2	Yes	27OCT15	27OCT2015	02	Entered	57	Female	27OCT15	108	MF4637	<250 mg/day	Yes	Yes	<250 mg/day	No	Yes	Yes	Yes	Yes
Visit 2			Normal	Dermatologic	02_001	2	Yes	27OCT15	27OCT2015	02	Entered	57	Female	27OCT15	108	MF4637	<250 mg/day	Yes	Yes	<250 mg/day	No	Yes	Yes	Yes	Yes
Visit 2			Normal	Musculoskeletal	02_001	2	Yes	27OCT15	27OCT2015	02	Entered	57	Female	27OCT15	108	MF4637	<250 mg/day	Yes	Yes	<250 mg/day	No	Yes	Yes	Yes	Yes
Visit 2			Not done	Circulatory	02_001	2	Yes	27OCT15	27OCT2015	02	Entered	57	Female	27OCT15	108	MF4637	<250 mg/day	Yes	Yes	<250 mg/day	No	Yes	Yes	Yes	Yes
Visit 2			Normal	Neurologic	02_001	2	Yes	27OCT15	27OCT2015	02	Entered	57	Female	27OCT15	108	MF4637	<250 mg/day	Yes	Yes	<250 mg/day	No	Yes	Yes	Yes	Yes
Visit 2			Normal	Lymphatic	02_001	2	Yes	27OCT15	27OCT2015	02	Entered	57	Female	27OCT15	108	MF4637	<250 mg/day	Yes	Yes	<250 mg/day	No	Yes	Yes	Yes	Yes
Visit 2			Normal	Respiratory	02_001	2	Yes	27OCT15	27OCT2015	02	Entered	57	Female	27OCT15	108	MF4637	<250 mg/day	Yes	Yes	<250 mg/day	No	Yes	Yes	Yes	Yes
Visit 2			Not done	Other, specify	02_001	2	Yes	27OCT15	27OCT2015	02	Entered	57	Female	27OCT15	108	MF4637	<250 mg/day	Yes	Yes	<250 mg/day	No	Yes	Yes	Yes	Yes
Visit 2			Normal	General appearance	02_002	2	Yes	05NOV15	05NOV2015	02	Entered	41	Male	06NOV15	109	MF4637	<250 mg/day	No	Yes	>=250 mg/day	No	Yes	Yes	Yes	Yes
Visit 2			Normal	Head, eyes, ears and nose	02_002	2	Yes	05NOV15	05NOV2015	02	Entered	41	Male	06NOV15	109	MF4637	<250 mg/day	No	Yes	>=250 mg/day	No	Yes	Yes	Yes	Yes
Visit 2			Normal	Mouth, teeth and throat	02_002	2	Yes	05NOV15	05NOV2015	02	Entered	41	Male	06NOV15	109	MF4637	<250 mg/day	No	Yes	>=250 mg/day	No	Yes	Yes	Yes	Yes
Visit 2			Normal	Neck and thyroid	02_002	2	Yes	05NOV15	05NOV2015	02	Entered	41	Male	06NOV15	109	MF4637	<250 mg/day	No	Yes	>=250 mg/day	No	Yes	Yes	Yes	Yes
Visit 2			Normal	Chest	02_002	2	Yes	05NOV15	05NOV2015	02	Entered	41	Male	06NOV15	109	MF4637	<250 mg/day	No	Yes	>=250 mg/day	No	Yes	Yes	Yes	Yes
Visit 2			Normal	Heart	02_002	2	Yes	05NOV15	05NOV2015	02	Entered	41	Male	06NOV15	109	MF4637	<250 mg/day	No	Yes	>=250 mg/day	No	Yes	Yes	Yes	Yes
Visit 2			Normal	Abdomen	02_002	2	Yes	05NOV15	05NOV2015	02	Entered	41	Male	06NOV15	109	MF4637	<250 mg/day	No	Yes	>=250 mg/day	No	Yes	Yes	Yes	Yes
Visit 2			Normal	Dermatologic	02_002	2	Yes	05NOV15	05NOV2015	02	Entered	41	Male	06NOV15	109	MF4637	<250 mg/day	No	Yes	>=250 mg/day	No	Yes	Yes	Yes	Yes
Visit 2			Normal	Musculoskeletal	02_002	2	Yes	05NOV15	05NOV2015	02	Entered	41	Male	06NOV15	109	MF4637	<250 mg/day	No	Yes	>=250 mg/day	No	Yes	Yes	Yes	Yes
Visit 2			Normal	Circulatory	02_002	2	Yes	05NOV15	05NOV2015	02	Entered	41	Male	06NOV15	109	MF4637	<250 mg/day	No	Yes	>=250 mg/day	No	Yes	Yes	Yes	Yes
Visit 2			Normal	Neurologic	02_002	2	Yes	05NOV15	05NOV2015	02	Entered	41	Male	06NOV15	109	MF4637	<250 mg/day	No	Yes	>=250 mg/day	No	Yes	Yes	Yes	Yes
Visit 2			Normal	Lymphatic	02_002	2	Yes	05NOV15	05NOV2015	02	Entered	41	Male	06NOV15	109	MF4637	<250 mg/day	No	Yes	>=250 mg/day	No	Yes	Yes	Yes	Yes
Visit 2			Normal	Respiratory	02_002	2	Yes	05NOV15	05NOV2015	02	Entered	41	Male	06NOV15	109	MF4637	<250 mg/day	No	Yes	>=250 mg/day	No	Yes	Yes	Yes	Yes
Visit 2				Other, specify	02_002	2	Yes	05NOV15	05NOV2015	02	Entered	41	Male	06NOV15	109	MF4637	<250 mg/day	No	Yes	>=250 mg/day	No	Yes	Yes	Yes	Yes
Visit 2			Normal	General appearance	02_003	2	Yes	03NOV15	03NOV2015	02	Entered	58	Male	03NOV15	110	Placebo	>=250 mg/day	Yes	Yes	<250 mg/day	No	Yes	Yes	Yes	Yes
Visit 2			Normal	Head, eyes, ears and nose	02_003	2	Yes	03NOV15	03NOV2015	02	Entered	58	Male	03NOV15	110	Placebo	>=250 mg/day	Yes	Yes	<250 mg/day	No	Yes	Yes	Yes	Yes
Visit 2			Normal	Mouth, teeth and throat	02_003	2	Yes	03NOV15	03NOV2015	02	Entered	58	Male	03NOV15	110	Placebo	>=250 mg/day	Yes	Yes	<250 mg/day	No	Yes	Yes	Yes	Yes
Visit 2			Normal	Neck and thyroid	02_003	2	Yes	03NOV15	03NOV2015	02	Entered	58	Male	03NOV15	110	Placebo	>=250 mg/day	Yes	Yes	<250 mg/day	No	Yes	Yes	Yes	Yes
Visit 2			Normal	Chest	02_003	2	Yes	03NOV15	03NOV2015	02	Entered	58	Male	03NOV15	110	Placebo	>=250 mg/day	Yes	Yes	<250 mg/day	No	Yes	Yes	Yes	Yes
Visit 2			Normal	Heart	02_003	2	Yes	03NOV15	03NOV2015	02	Entered	58	Male	03NOV15	110	Placebo	>=250 mg/day	Yes	Yes	<250 mg/day	No	Yes	Yes	Yes	Yes
Visit 2			Normal	Abdomen	02_003	2	Yes	03NOV15	03NOV2015	02	Entered	58	Male	03NOV15	110	Placebo	>=250 mg/day	Yes	Yes	<250 mg/day	No	Yes	Yes	Yes	Yes
Visit 2			Normal	Dermatologic	02_003	2	Yes	03NOV15	03NOV2015	02	Entered	58	Male	03NOV15	110	Placebo	>=250 mg/day	Yes	Yes	<250 mg/day	No	Yes	Yes	Yes	Yes
Visit 2			Normal	Musculoskeletal	02_003	2	Yes	03NOV15	03NOV2015	02	Entered	58	Male	03NOV15	110	Placebo	>=250 mg/day	Yes	Yes	<250 mg/day	No	Yes	Yes	Yes	Yes
Visit 2			Normal	Circulatory	02_003	2	Yes	03NOV15	03NOV2015	02	Entered	58	Male	03NOV15	110	Placebo	>=250 mg/day	Yes	Yes	<250 mg/day	No	Yes	Yes	Yes	Yes
Visit 2			Normal	Neurologic	02_003	2	Yes	03NOV15	03NOV2015	02	Entered	58	Male	03NOV15	110	Placebo	>=250 mg/day	Yes	Yes	<250 mg/day	No	Yes	Yes	Yes	Yes
Visit 2			Normal	Lymphatic	02_003	2	Yes	03NOV15	03NOV2015	02	Entered	58	Male	03NOV15	110	Placebo	>=250 mg/day	Yes	Yes	<250 mg/day	No	Yes	Yes	Yes	Yes
Visit 2			Normal	Respiratory	02_003	2	Yes	03NOV15	03NOV2015	02	Entered	58	Male	03NOV15	110	Placebo	>=250 mg/day	Yes	Yes	<250 mg/day	No	Yes	Yes	Yes	Yes
Visit 2			Not done	Other, specify	02_003	2	Yes	03NOV15	03NOV2015	02	Entered	58	Male	03NOV15	110	Placebo	>=250 mg/day	Yes	Yes	<250 mg/day	No	Yes	Yes	Yes	Yes
Visit 2			Normal	General appearance	02_004	2	Yes	11NOV15	11NOV2015	02	Early Termination	60	Female	12NOV15	111	Placebo	<250 mg/day	Yes	Yes	<250 mg/day	No	Yes	Yes	Yes	Yes
Visit 2			Normal	Head, eyes, ears and nose	02_004	2	Yes	11NOV15	11NOV2015	02	Early Termination	60	Female	12NOV15	111	Placebo	<250 mg/day	Yes	Yes	<250 mg/day	No	Yes	Yes	Yes	Yes
Visit 2			Normal	Mouth, teeth and throat	02_004	2	Yes	11NOV15	11NOV2015	02	Early Termination	60	Female	12NOV15	111	Placebo	<250 mg/day	Yes	Yes	<250 mg/day	No	Yes	Yes	Yes	Yes
Visit 2			Normal	Neck and thyroid	02_004	2	Yes	11NOV15	11NOV2015	02	Early Termination	60	Female	12NOV15	111	Placebo	<250 mg/day	Yes	Yes	<250 mg/day	No	Yes	Yes	Yes	Yes
Visit 2			Normal	Chest	02_004	2	Yes	11NOV15	11NOV2015	02	Early Termination	60	Female	12NOV15	111	Placebo	<250 mg/day	Yes	Yes	<250 mg/day	No	Yes	Yes	Yes	Yes
Visit 2			Normal	Heart	02_004	2	Yes	11NOV15	11NOV2015	02	Early Termination	60	Female	12NOV15	111	Placebo	<250 mg/day	Yes	Yes	<250 mg/day	No	Yes	Yes	Yes	Yes
Visit 2			Normal	Abdomen	02_004	2	Yes	11NOV15	11NOV2015	02	Early Termination	60	Female	12NOV15	111	Placebo	<250 mg/day	Yes	Yes	<250 mg/day	No	Yes	Yes	Yes	Yes
Visit 2			Normal	Dermatologic	02_004	2	Yes	11NOV15	11NOV2015	02	Early Termination	60	Female	12NOV15	111	Placebo	<250 mg/day	Yes	Yes	<250 mg/day	No	Yes	Yes	Yes	Yes
Visit 2			Normal	Musculoskeletal	02_004	2	Yes	11NOV15	11NOV2015	02	Early Termination	60	Female	12NOV15	111	Placebo	<250 mg/day	Yes	Yes	<250 mg/day	No	Yes	Yes	Yes	Yes
Visit 2			Normal	Circulatory	02_004	2	Yes	11NOV15	11NOV2015	02	Early Termination	60	Female	12NOV15	111	Placebo	<250 mg/day	Yes	Yes	<250 mg/day	No	Yes	Yes	Yes	Yes
Visit 2			Normal	Neurologic	02_004	2	Yes	11NOV15	11NOV2015	02	Early Termination	60	Female	12NOV15	111	Placebo	<250 mg/day	Yes	Yes	<250 mg/day	No	Yes	Yes	Yes	Yes
Visit 2			Normal	Lymphatic	02_004	2	Yes	11NOV15	11NOV2015	02	Early Termination	60	Female	12NOV15	111	Placebo	<250 mg/day	Yes	Yes	<250 mg/day	No	Yes	Yes	Yes	Yes
Visit 2			Normal	Respiratory	02_004	2	Yes	11NOV15	11NOV2015	02	Early Termination	60	Female	12NOV15	111	Placebo	<250 mg/day	Yes	Yes	<250 mg/day	No	Yes	Yes	Yes	Yes
Visit 2			Not done	Other, specify	02_004	2	Yes	11NOV15	11NOV2015	02	Early Termination	60	Female	12NOV15	111	Placebo	<250 mg/day	Yes	Yes	<250 mg/day	No	Yes	Yes	Yes	Yes
Visit 2			Normal	General appearance	02_005	2	Yes	04DEC15	04DEC2015	02	Entered	65	Male	04DEC15	112	Placebo	>=250 mg/day	No	No	>=250 mg/day	No	Yes	Yes	Yes	Yes
Visit 2			Normal	Head, eyes, ears and nose	02_005	2	Yes	04DEC15	04DEC2015	02	Entered	65	Male	04DEC15	112	Placebo	>=250 mg/day	No	No	>=250 mg/day	No	Yes	Yes	Yes	Yes
Visit 2		Poor dentition- NCS	Abnormal	Mouth, teeth and throat	02_005	2	Yes	04DEC15	04DEC2015	02	Entered	65	Male	04DEC15	112	Placebo	>=250 mg/day	No	No	>=250 mg/day	No	Yes	Yes	Yes	Yes
Visit 2			Normal	Neck and thyroid	02_005	2	Yes	04DEC15	04DEC2015	02	Entered	65	Male	04DEC15	112	Placebo	>=250 mg/day	No	No	>=250 mg/day	No	Yes	Yes	Yes	Yes
Visit 2			Normal	Chest	02_005	2	Yes	04DEC15	04DEC2015	02	Entered	65	Male	04DEC15	112	Placebo	>=250 mg/day	No	No	>=250 mg/day	No	Yes	Yes	Yes	Yes
Visit 2			Normal	Heart	02_005	2	Yes	04DEC15	04DEC2015	02	Entered	65	Male	04DEC15	112	Placebo	>=250 mg/day	No	No	>=250 mg/day	No	Yes	Yes	Yes	Yes
Visit 2			Normal	Abdomen	02_005	2	Yes	04DEC15	04DEC2015	02	Entered	65	Male	04DEC15	112	Placebo	>=250 mg/day	No	No	>=250 mg/day	No	Yes	Yes	Yes	Yes
Visit 2		Fungal benign karatosis - NCS	Abnormal	Dermatologic	02_005	2	Yes	04DEC15	04DEC2015	02	Entered	65	Male	04DEC15	112	Placebo	>=250 mg/day	No	No	>=250 mg/day	No	Yes	Yes	Yes	Yes
Visit 2			Normal	Musculoskeletal	02_005	2	Yes	04DEC15	04DEC2015	02	Entered	65	Male	04DEC15	112	Placebo	>=250 mg/day	No	No	>=250 mg/day	No	Yes	Yes	Yes	Yes
Visit 2			Normal	Circulatory	02_005	2	Yes	04DEC15	04DEC2015	02	Entered	65	Male	04DEC15	112	Placebo	>=250 mg/day	No	No	>=250 mg/day	No	Yes	Yes	Yes	Yes
Visit 2			Normal	Neurologic	02_005	2	Yes	04DEC15	04DEC2015	02	Entered	65	Male	04DEC15	112	Placebo	>=250 mg/day	No	No	>=250 mg/day	No	Yes	Yes	Yes	Yes
Visit 2			Normal	Lymphatic	02_005	2	Yes	04DEC15	04DEC2015	02	Entered	65	Male	04DEC15	112	Placebo	>=250 mg/day	No	No	>=250 mg/day	No	Yes	Yes	Yes	Yes
Visit 2			Normal	Respiratory	02_005	2	Yes	04DEC15	04DEC2015	02	Entered	65	Male	04DEC15	112	Placebo	>=250 mg/day	No	No	>=250 mg/day	No	Yes	Yes	Yes	Yes
Visit 2			Not done	Other, specify	02_005	2	Yes	04DEC15	04DEC2015	02	Entered	65	Male	04DEC15	112	Placebo	>=250 mg/day	No	No	>=250 mg/day	No	Yes	Yes	Yes	Yes
Visit 2			Normal	General appearance	03_001	2	Yes	19NOV15	19NOV2015	03	Early Termination	53	Male	19NOV15	117	MF4637	<250 mg/day	No	No	>=250 mg/day	No	Yes	Yes	No	No
Visit 2			Normal	Head, eyes, ears and nose	03_001	2	Yes	19NOV15	19NOV2015	03	Early Termination	53	Male	19NOV15	117	MF4637	<250 mg/day	No	No	>=250 mg/day	No	Yes	Yes	No	No
Visit 2			Normal	Mouth, teeth and throat	03_001	2	Yes	19NOV15	19NOV2015	03	Early Termination	53	Male	19NOV15	117	MF4637	<250 mg/day	No	No	>=250 mg/day	No	Yes	Yes	No	No
Visit 2			Normal	Neck and thyroid	03_001	2	Yes	19NOV15	19NOV2015	03	Early Termination	53	Male	19NOV15	117	MF4637	<250 mg/day	No	No	>=250 mg/day	No	Yes	Yes	No	No
Visit 2			Normal	Chest	03_001	2	Yes	19NOV15	19NOV2015	03	Early Termination	53	Male	19NOV15	117	MF4637	<250 mg/day	No	No	>=250 mg/day	No	Yes	Yes	No	No
Visit 2			Normal	Heart	03_001	2	Yes	19NOV15	19NOV2015	03	Early Termination	53	Male	19NOV15	117	MF4637	<250 mg/day	No	No	>=250 mg/day	No	Yes	Yes	No	No
Visit 2			Normal	Abdomen	03_001	2	Yes	19NOV15	19NOV2015	03	Early Termination	53	Male	19NOV15	117	MF4637	<250 mg/day	No	No	>=250 mg/day	No	Yes	Yes	No	No
Visit 2			Normal	Dermatologic	03_001	2	Yes	19NOV15	19NOV2015	03	Early Termination	53	Male	19NOV15	117	MF4637	<250 mg/day	No	No	>=250 mg/day	No	Yes	Yes	No	No
Visit 2		Thick discolored no clinacally significant	Abnormal	Musculoskeletal	03_001	2	Yes	19NOV15	19NOV2015	03	Early Termination	53	Male	19NOV15	117	MF4637	<250 mg/day	No	No	>=250 mg/day	No	Yes	Yes	No	No
Visit 2			Normal	Circulatory	03_001	2	Yes	19NOV15	19NOV2015	03	Early Termination	53	Male	19NOV15	117	MF4637	<250 mg/day	No	No	>=250 mg/day	No	Yes	Yes	No	No
Visit 2			Normal	Neurologic	03_001	2	Yes	19NOV15	19NOV2015	03	Early Termination	53	Male	19NOV15	117	MF4637	<250 mg/day	No	No	>=250 mg/day	No	Yes	Yes	No	No
Visit 2				Lymphatic	03_001	2	Yes	19NOV15	19NOV2015	03	Early Termination	53	Male	19NOV15	117	MF4637	<250 mg/day	No	No	>=250 mg/day	No	Yes	Yes	No	No
Visit 2				Respiratory	03_001	2	Yes	19NOV15	19NOV2015	03	Early Termination	53	Male	19NOV15	117	MF4637	<250 mg/day	No	No	>=250 mg/day	No	Yes	Yes	No	No
Visit 2				Other, specify	03_001	2	Yes	19NOV15	19NOV2015	03	Early Termination	53	Male	19NOV15	117	MF4637	<250 mg/day	No	No	>=250 mg/day	No	Yes	Yes	No	No
Visit 2			Normal	General appearance	03_002	2	Yes	30OCT15	30OCT2015	03	Early Termination	52	Female	30OCT15	116	Placebo	<250 mg/day	No	No	<250 mg/day	No	Yes	Yes	Yes	Yes
Visit 2		Tympanosclerosis	Abnormal	Head, eyes, ears and nose	03_002	2	Yes	30OCT15	30OCT2015	03	Early Termination	52	Female	30OCT15	116	Placebo	<250 mg/day	No	No	<250 mg/day	No	Yes	Yes	Yes	Yes
Visit 2			Normal	Mouth, teeth and throat	03_002	2	Yes	30OCT15	30OCT2015	03	Early Termination	52	Female	30OCT15	116	Placebo	<250 mg/day	No	No	<250 mg/day	No	Yes	Yes	Yes	Yes
Visit 2			Normal	Neck and thyroid	03_002	2	Yes	30OCT15	30OCT2015	03	Early Termination	52	Female	30OCT15	116	Placebo	<250 mg/day	No	No	<250 mg/day	No	Yes	Yes	Yes	Yes
Visit 2			Normal	Chest	03_002	2	Yes	30OCT15	30OCT2015	03	Early Termination	52	Female	30OCT15	116	Placebo	<250 mg/day	No	No	<250 mg/day	No	Yes	Yes	Yes	Yes
Visit 2			Normal	Heart	03_002	2	Yes	30OCT15	30OCT2015	03	Early Termination	52	Female	30OCT15	116	Placebo	<250 mg/day	No	No	<250 mg/day	No	Yes	Yes	Yes	Yes
Visit 2			Normal	Abdomen	03_002	2	Yes	30OCT15	30OCT2015	03	Early Termination	52	Female	30OCT15	116	Placebo	<250 mg/day	No	No	<250 mg/day	No	Yes	Yes	Yes	Yes
Visit 2			Normal	Dermatologic	03_002	2	Yes	30OCT15	30OCT2015	03	Early Termination	52	Female	30OCT15	116	Placebo	<250 mg/day	No	No	<250 mg/day	No	Yes	Yes	Yes	Yes
Visit 2			Normal	Musculoskeletal	03_002	2	Yes	30OCT15	30OCT2015	03	Early Termination	52	Female	30OCT15	116	Placebo	<250 mg/day	No	No	<250 mg/day	No	Yes	Yes	Yes	Yes
Visit 2			Normal	Circulatory	03_002	2	Yes	30OCT15	30OCT2015	03	Early Termination	52	Female	30OCT15	116	Placebo	<250 mg/day	No	No	<250 mg/day	No	Yes	Yes	Yes	Yes
Visit 2			Normal	Neurologic	03_002	2	Yes	30OCT15	30OCT2015	03	Early Termination	52	Female	30OCT15	116	Placebo	<250 mg/day	No	No	<250 mg/day	No	Yes	Yes	Yes	Yes
Visit 2			Normal	Lymphatic	03_002	2	Yes	30OCT15	30OCT2015	03	Early Termination	52	Female	30OCT15	116	Placebo	<250 mg/day	No	No	<250 mg/day	No	Yes	Yes	Yes	Yes
Visit 2			Normal	Respiratory	03_002	2	Yes	30OCT15	30OCT2015	03	Early Termination	52	Female	30OCT15	116	Placebo	<250 mg/day	No	No	<250 mg/day	No	Yes	Yes	Yes	Yes
Visit 2			Not done	Other, specify	03_002	2	Yes	30OCT15	30OCT2015	03	Early Termination	52	Female	30OCT15	116	Placebo	<250 mg/day	No	No	<250 mg/day	No	Yes	Yes	Yes	Yes
Visit 2			Normal	General appearance	03_003	2	Yes	24NOV15	24NOV2015	03	Entered	25	Male	24NOV15	121	MF4637	<250 mg/day	No	No	<250 mg/day	No	Yes	Yes	Yes	Yes
Visit 2			Normal	Head, eyes, ears and nose	03_003	2	Yes	24NOV15	24NOV2015	03	Entered	25	Male	24NOV15	121	MF4637	<250 mg/day	No	No	<250 mg/day	No	Yes	Yes	Yes	Yes
Visit 2			Normal	Mouth, teeth and throat	03_003	2	Yes	24NOV15	24NOV2015	03	Entered	25	Male	24NOV15	121	MF4637	<250 mg/day	No	No	<250 mg/day	No	Yes	Yes	Yes	Yes
Visit 2			Normal	Neck and thyroid	03_003	2	Yes	24NOV15	24NOV2015	03	Entered	25	Male	24NOV15	121	MF4637	<250 mg/day	No	No	<250 mg/day	No	Yes	Yes	Yes	Yes
Visit 2			Normal	Chest	03_003	2	Yes	24NOV15	24NOV2015	03	Entered	25	Male	24NOV15	121	MF4637	<250 mg/day	No	No	<250 mg/day	No	Yes	Yes	Yes	Yes
Visit 2			Normal	Heart	03_003	2	Yes	24NOV15	24NOV2015	03	Entered	25	Male	24NOV15	121	MF4637	<250 mg/day	No	No	<250 mg/day	No	Yes	Yes	Yes	Yes
Visit 2			Normal	Abdomen	03_003	2	Yes	24NOV15	24NOV2015	03	Entered	25	Male	24NOV15	121	MF4637	<250 mg/day	No	No	<250 mg/day	No	Yes	Yes	Yes	Yes
Visit 2			Normal	Dermatologic	03_003	2	Yes	24NOV15	24NOV2015	03	Entered	25	Male	24NOV15	121	MF4637	<250 mg/day	No	No	<250 mg/day	No	Yes	Yes	Yes	Yes
Visit 2			Normal	Musculoskeletal	03_003	2	Yes	24NOV15	24NOV2015	03	Entered	25	Male	24NOV15	121	MF4637	<250 mg/day	No	No	<250 mg/day	No	Yes	Yes	Yes	Yes
Visit 2			Normal	Circulatory	03_003	2	Yes	24NOV15	24NOV2015	03	Entered	25	Male	24NOV15	121	MF4637	<250 mg/day	No	No	<250 mg/day	No	Yes	Yes	Yes	Yes
Visit 2			Normal	Neurologic	03_003	2	Yes	24NOV15	24NOV2015	03	Entered	25	Male	24NOV15	121	MF4637	<250 mg/day	No	No	<250 mg/day	No	Yes	Yes	Yes	Yes
Visit 2			Normal	Lymphatic	03_003	2	Yes	24NOV15	24NOV2015	03	Entered	25	Male	24NOV15	121	MF4637	<250 mg/day	No	No	<250 mg/day	No	Yes	Yes	Yes	Yes
Visit 2			Normal	Respiratory	03_003	2	Yes	24NOV15	24NOV2015	03	Entered	25	Male	24NOV15	121	MF4637	<250 mg/day	No	No	<250 mg/day	No	Yes	Yes	Yes	Yes
Visit 2			Not done	Other, specify	03_003	2	Yes	24NOV15	24NOV2015	03	Entered	25	Male	24NOV15	121	MF4637	<250 mg/day	No	No	<250 mg/day	No	Yes	Yes	Yes	Yes
Visit 2			Normal	General appearance	03_004	2	Yes	23NOV15	23NOV2015	03	Entered	56	Female	24NOV15	118	Placebo	<250 mg/day	No	No	>=250 mg/day	No	Yes	Yes	Yes	Yes
Visit 2			Normal	Head, eyes, ears and nose	03_004	2	Yes	23NOV15	23NOV2015	03	Entered	56	Female	24NOV15	118	Placebo	<250 mg/day	No	No	>=250 mg/day	No	Yes	Yes	Yes	Yes
Visit 2			Normal	Mouth, teeth and throat	03_004	2	Yes	23NOV15	23NOV2015	03	Entered	56	Female	24NOV15	118	Placebo	<250 mg/day	No	No	>=250 mg/day	No	Yes	Yes	Yes	Yes
Visit 2			Normal	Neck and thyroid	03_004	2	Yes	23NOV15	23NOV2015	03	Entered	56	Female	24NOV15	118	Placebo	<250 mg/day	No	No	>=250 mg/day	No	Yes	Yes	Yes	Yes
Visit 2			Normal	Chest	03_004	2	Yes	23NOV15	23NOV2015	03	Entered	56	Female	24NOV15	118	Placebo	<250 mg/day	No	No	>=250 mg/day	No	Yes	Yes	Yes	Yes
Visit 2			Normal	Heart	03_004	2	Yes	23NOV15	23NOV2015	03	Entered	56	Female	24NOV15	118	Placebo	<250 mg/day	No	No	>=250 mg/day	No	Yes	Yes	Yes	Yes
Visit 2		obese	Abnormal	Abdomen	03_004	2	Yes	23NOV15	23NOV2015	03	Entered	56	Female	24NOV15	118	Placebo	<250 mg/day	No	No	>=250 mg/day	No	Yes	Yes	Yes	Yes
Visit 2			Normal	Dermatologic	03_004	2	Yes	23NOV15	23NOV2015	03	Entered	56	Female	24NOV15	118	Placebo	<250 mg/day	No	No	>=250 mg/day	No	Yes	Yes	Yes	Yes
Visit 2			Normal	Musculoskeletal	03_004	2	Yes	23NOV15	23NOV2015	03	Entered	56	Female	24NOV15	118	Placebo	<250 mg/day	No	No	>=250 mg/day	No	Yes	Yes	Yes	Yes
Visit 2			Normal	Circulatory	03_004	2	Yes	23NOV15	23NOV2015	03	Entered	56	Female	24NOV15	118	Placebo	<250 mg/day	No	No	>=250 mg/day	No	Yes	Yes	Yes	Yes
Visit 2			Normal	Neurologic	03_004	2	Yes	23NOV15	23NOV2015	03	Entered	56	Female	24NOV15	118	Placebo	<250 mg/day	No	No	>=250 mg/day	No	Yes	Yes	Yes	Yes
Visit 2			Normal	Lymphatic	03_004	2	Yes	23NOV15	23NOV2015	03	Entered	56	Female	24NOV15	118	Placebo	<250 mg/day	No	No	>=250 mg/day	No	Yes	Yes	Yes	Yes
Visit 2			Normal	Respiratory	03_004	2	Yes	23NOV15	23NOV2015	03	Entered	56	Female	24NOV15	118	Placebo	<250 mg/day	No	No	>=250 mg/day	No	Yes	Yes	Yes	Yes
Visit 2			Not done	Other, specify	03_004	2	Yes	23NOV15	23NOV2015	03	Entered	56	Female	24NOV15	118	Placebo	<250 mg/day	No	No	>=250 mg/day	No	Yes	Yes	Yes	Yes
Visit 2			Normal	General appearance	03_005	2	Yes	24NOV15	24NOV2015	03	Early Termination	49	Female	25NOV15	119	MF4637	>=250 mg/day	No	No	<250 mg/day	No	Yes	Yes	Yes	Yes
Visit 2			Normal	Head, eyes, ears and nose	03_005	2	Yes	24NOV15	24NOV2015	03	Early Termination	49	Female	25NOV15	119	MF4637	>=250 mg/day	No	No	<250 mg/day	No	Yes	Yes	Yes	Yes
Visit 2			Normal	Mouth, teeth and throat	03_005	2	Yes	24NOV15	24NOV2015	03	Early Termination	49	Female	25NOV15	119	MF4637	>=250 mg/day	No	No	<250 mg/day	No	Yes	Yes	Yes	Yes
Visit 2			Normal	Neck and thyroid	03_005	2	Yes	24NOV15	24NOV2015	03	Early Termination	49	Female	25NOV15	119	MF4637	>=250 mg/day	No	No	<250 mg/day	No	Yes	Yes	Yes	Yes
Visit 2			Normal	Chest	03_005	2	Yes	24NOV15	24NOV2015	03	Early Termination	49	Female	25NOV15	119	MF4637	>=250 mg/day	No	No	<250 mg/day	No	Yes	Yes	Yes	Yes
Visit 2			Normal	Heart	03_005	2	Yes	24NOV15	24NOV2015	03	Early Termination	49	Female	25NOV15	119	MF4637	>=250 mg/day	No	No	<250 mg/day	No	Yes	Yes	Yes	Yes
Visit 2			Normal	Abdomen	03_005	2	Yes	24NOV15	24NOV2015	03	Early Termination	49	Female	25NOV15	119	MF4637	>=250 mg/day	No	No	<250 mg/day	No	Yes	Yes	Yes	Yes
Visit 2			Normal	Dermatologic	03_005	2	Yes	24NOV15	24NOV2015	03	Early Termination	49	Female	25NOV15	119	MF4637	>=250 mg/day	No	No	<250 mg/day	No	Yes	Yes	Yes	Yes
Visit 2			Normal	Musculoskeletal	03_005	2	Yes	24NOV15	24NOV2015	03	Early Termination	49	Female	25NOV15	119	MF4637	>=250 mg/day	No	No	<250 mg/day	No	Yes	Yes	Yes	Yes
Visit 2			Normal	Circulatory	03_005	2	Yes	24NOV15	24NOV2015	03	Early Termination	49	Female	25NOV15	119	MF4637	>=250 mg/day	No	No	<250 mg/day	No	Yes	Yes	Yes	Yes
Visit 2			Normal	Neurologic	03_005	2	Yes	24NOV15	24NOV2015	03	Early Termination	49	Female	25NOV15	119	MF4637	>=250 mg/day	No	No	<250 mg/day	No	Yes	Yes	Yes	Yes
Visit 2			Normal	Lymphatic	03_005	2	Yes	24NOV15	24NOV2015	03	Early Termination	49	Female	25NOV15	119	MF4637	>=250 mg/day	No	No	<250 mg/day	No	Yes	Yes	Yes	Yes
Visit 2			Normal	Respiratory	03_005	2	Yes	24NOV15	24NOV2015	03	Early Termination	49	Female	25NOV15	119	MF4637	>=250 mg/day	No	No	<250 mg/day	No	Yes	Yes	Yes	Yes
Visit 2			Not done	Other, specify	03_005	2	Yes	24NOV15	24NOV2015	03	Early Termination	49	Female	25NOV15	119	MF4637	>=250 mg/day	No	No	<250 mg/day	No	Yes	Yes	Yes	Yes
Visit 2		obese	Abnormal	General appearance	03_007	2	Yes	18NOV15	18NOV2015	03	Entered	40	Male	19NOV15	120	Placebo	<250 mg/day	No	No	<250 mg/day	No	Yes	Yes	Yes	No
Visit 2			Normal	Head, eyes, ears and nose	03_007	2	Yes	18NOV15	18NOV2015	03	Entered	40	Male	19NOV15	120	Placebo	<250 mg/day	No	No	<250 mg/day	No	Yes	Yes	Yes	No
Visit 2			Normal	Mouth, teeth and throat	03_007	2	Yes	18NOV15	18NOV2015	03	Entered	40	Male	19NOV15	120	Placebo	<250 mg/day	No	No	<250 mg/day	No	Yes	Yes	Yes	No
Visit 2			Normal	Neck and thyroid	03_007	2	Yes	18NOV15	18NOV2015	03	Entered	40	Male	19NOV15	120	Placebo	<250 mg/day	No	No	<250 mg/day	No	Yes	Yes	Yes	No
Visit 2			Normal	Chest	03_007	2	Yes	18NOV15	18NOV2015	03	Entered	40	Male	19NOV15	120	Placebo	<250 mg/day	No	No	<250 mg/day	No	Yes	Yes	Yes	No
Visit 2			Normal	Heart	03_007	2	Yes	18NOV15	18NOV2015	03	Entered	40	Male	19NOV15	120	Placebo	<250 mg/day	No	No	<250 mg/day	No	Yes	Yes	Yes	No
Visit 2			Normal	Abdomen	03_007	2	Yes	18NOV15	18NOV2015	03	Entered	40	Male	19NOV15	120	Placebo	<250 mg/day	No	No	<250 mg/day	No	Yes	Yes	Yes	No
Visit 2			Normal	Dermatologic	03_007	2	Yes	18NOV15	18NOV2015	03	Entered	40	Male	19NOV15	120	Placebo	<250 mg/day	No	No	<250 mg/day	No	Yes	Yes	Yes	No
Visit 2			Normal	Musculoskeletal	03_007	2	Yes	18NOV15	18NOV2015	03	Entered	40	Male	19NOV15	120	Placebo	<250 mg/day	No	No	<250 mg/day	No	Yes	Yes	Yes	No
Visit 2			Normal	Circulatory	03_007	2	Yes	18NOV15	18NOV2015	03	Entered	40	Male	19NOV15	120	Placebo	<250 mg/day	No	No	<250 mg/day	No	Yes	Yes	Yes	No
Visit 2			Normal	Neurologic	03_007	2	Yes	18NOV15	18NOV2015	03	Entered	40	Male	19NOV15	120	Placebo	<250 mg/day	No	No	<250 mg/day	No	Yes	Yes	Yes	No
Visit 2			Normal	Lymphatic	03_007	2	Yes	18NOV15	18NOV2015	03	Entered	40	Male	19NOV15	120	Placebo	<250 mg/day	No	No	<250 mg/day	No	Yes	Yes	Yes	No
Visit 2			Normal	Respiratory	03_007	2	Yes	18NOV15	18NOV2015	03	Entered	40	Male	19NOV15	120	Placebo	<250 mg/day	No	No	<250 mg/day	No	Yes	Yes	Yes	No
Visit 2			Not done	Other, specify	03_007	2	Yes	18NOV15	18NOV2015	03	Entered	40	Male	19NOV15	120	Placebo	<250 mg/day	No	No	<250 mg/day	No	Yes	Yes	Yes	No
Visit 2			Normal	General appearance	03_009	2	Yes	12JAN16	12JAN2016	03	Entered	40	Male	13JAN16	122	MF4637	<250 mg/day	No	No	>=250 mg/day	No	Yes	Yes	Yes	Yes
Visit 2			Normal	Head, eyes, ears and nose	03_009	2	Yes	12JAN16	12JAN2016	03	Entered	40	Male	13JAN16	122	MF4637	<250 mg/day	No	No	>=250 mg/day	No	Yes	Yes	Yes	Yes
Visit 2			Normal	Mouth, teeth and throat	03_009	2	Yes	12JAN16	12JAN2016	03	Entered	40	Male	13JAN16	122	MF4637	<250 mg/day	No	No	>=250 mg/day	No	Yes	Yes	Yes	Yes
Visit 2			Normal	Neck and thyroid	03_009	2	Yes	12JAN16	12JAN2016	03	Entered	40	Male	13JAN16	122	MF4637	<250 mg/day	No	No	>=250 mg/day	No	Yes	Yes	Yes	Yes
Visit 2			Normal	Chest	03_009	2	Yes	12JAN16	12JAN2016	03	Entered	40	Male	13JAN16	122	MF4637	<250 mg/day	No	No	>=250 mg/day	No	Yes	Yes	Yes	Yes
Visit 2			Normal	Heart	03_009	2	Yes	12JAN16	12JAN2016	03	Entered	40	Male	13JAN16	122	MF4637	<250 mg/day	No	No	>=250 mg/day	No	Yes	Yes	Yes	Yes
Visit 2			Normal	Abdomen	03_009	2	Yes	12JAN16	12JAN2016	03	Entered	40	Male	13JAN16	122	MF4637	<250 mg/day	No	No	>=250 mg/day	No	Yes	Yes	Yes	Yes
Visit 2			Normal	Dermatologic	03_009	2	Yes	12JAN16	12JAN2016	03	Entered	40	Male	13JAN16	122	MF4637	<250 mg/day	No	No	>=250 mg/day	No	Yes	Yes	Yes	Yes
Visit 2			Normal	Musculoskeletal	03_009	2	Yes	12JAN16	12JAN2016	03	Entered	40	Male	13JAN16	122	MF4637	<250 mg/day	No	No	>=250 mg/day	No	Yes	Yes	Yes	Yes
Visit 2			Normal	Circulatory	03_009	2	Yes	12JAN16	12JAN2016	03	Entered	40	Male	13JAN16	122	MF4637	<250 mg/day	No	No	>=250 mg/day	No	Yes	Yes	Yes	Yes
Visit 2			Normal	Neurologic	03_009	2	Yes	12JAN16	12JAN2016	03	Entered	40	Male	13JAN16	122	MF4637	<250 mg/day	No	No	>=250 mg/day	No	Yes	Yes	Yes	Yes
Visit 2			Normal	Lymphatic	03_009	2	Yes	12JAN16	12JAN2016	03	Entered	40	Male	13JAN16	122	MF4637	<250 mg/day	No	No	>=250 mg/day	No	Yes	Yes	Yes	Yes
Visit 2			Normal	Respiratory	03_009	2	Yes	12JAN16	12JAN2016	03	Entered	40	Male	13JAN16	122	MF4637	<250 mg/day	No	No	>=250 mg/day	No	Yes	Yes	Yes	Yes
Visit 2			Not done	Other, specify	03_009	2	Yes	12JAN16	12JAN2016	03	Entered	40	Male	13JAN16	122	MF4637	<250 mg/day	No	No	>=250 mg/day	No	Yes	Yes	Yes	Yes
Visit 2			Normal	General appearance	03_010	2	Yes	12JAN16	12JAN2016	03	Entered	41	Male	12JAN16	123	Placebo	>=250 mg/day	No	No	>=250 mg/day	No	Yes	Yes	Yes	Yes
Visit 2			Normal	Head, eyes, ears and nose	03_010	2	Yes	12JAN16	12JAN2016	03	Entered	41	Male	12JAN16	123	Placebo	>=250 mg/day	No	No	>=250 mg/day	No	Yes	Yes	Yes	Yes
Visit 2			Normal	Mouth, teeth and throat	03_010	2	Yes	12JAN16	12JAN2016	03	Entered	41	Male	12JAN16	123	Placebo	>=250 mg/day	No	No	>=250 mg/day	No	Yes	Yes	Yes	Yes
Visit 2			Normal	Neck and thyroid	03_010	2	Yes	12JAN16	12JAN2016	03	Entered	41	Male	12JAN16	123	Placebo	>=250 mg/day	No	No	>=250 mg/day	No	Yes	Yes	Yes	Yes
Visit 2			Normal	Chest	03_010	2	Yes	12JAN16	12JAN2016	03	Entered	41	Male	12JAN16	123	Placebo	>=250 mg/day	No	No	>=250 mg/day	No	Yes	Yes	Yes	Yes
Visit 2			Normal	Heart	03_010	2	Yes	12JAN16	12JAN2016	03	Entered	41	Male	12JAN16	123	Placebo	>=250 mg/day	No	No	>=250 mg/day	No	Yes	Yes	Yes	Yes
Visit 2			Normal	Abdomen	03_010	2	Yes	12JAN16	12JAN2016	03	Entered	41	Male	12JAN16	123	Placebo	>=250 mg/day	No	No	>=250 mg/day	No	Yes	Yes	Yes	Yes
Visit 2			Normal	Dermatologic	03_010	2	Yes	12JAN16	12JAN2016	03	Entered	41	Male	12JAN16	123	Placebo	>=250 mg/day	No	No	>=250 mg/day	No	Yes	Yes	Yes	Yes
Visit 2			Normal	Musculoskeletal	03_010	2	Yes	12JAN16	12JAN2016	03	Entered	41	Male	12JAN16	123	Placebo	>=250 mg/day	No	No	>=250 mg/day	No	Yes	Yes	Yes	Yes
Visit 2			Normal	Circulatory	03_010	2	Yes	12JAN16	12JAN2016	03	Entered	41	Male	12JAN16	123	Placebo	>=250 mg/day	No	No	>=250 mg/day	No	Yes	Yes	Yes	Yes
Visit 2			Normal	Neurologic	03_010	2	Yes	12JAN16	12JAN2016	03	Entered	41	Male	12JAN16	123	Placebo	>=250 mg/day	No	No	>=250 mg/day	No	Yes	Yes	Yes	Yes
Visit 2			Normal	Lymphatic	03_010	2	Yes	12JAN16	12JAN2016	03	Entered	41	Male	12JAN16	123	Placebo	>=250 mg/day	No	No	>=250 mg/day	No	Yes	Yes	Yes	Yes
Visit 2			Normal	Respiratory	03_010	2	Yes	12JAN16	12JAN2016	03	Entered	41	Male	12JAN16	123	Placebo	>=250 mg/day	No	No	>=250 mg/day	No	Yes	Yes	Yes	Yes
Visit 2			Not done	Other, specify	03_010	2	Yes	12JAN16	12JAN2016	03	Entered	41	Male	12JAN16	123	Placebo	>=250 mg/day	No	No	>=250 mg/day	No	Yes	Yes	Yes	Yes
Visit 2			Normal	General appearance	03_011	2	Yes	10FEB16	10FEB2016	03	Entered	55	Male	11FEB16	188	MF4637	<250 mg/day	No	Yes	<250 mg/day	No	Yes	Yes	Yes	Yes
Visit 2			Normal	Head, eyes, ears and nose	03_011	2	Yes	10FEB16	10FEB2016	03	Entered	55	Male	11FEB16	188	MF4637	<250 mg/day	No	Yes	<250 mg/day	No	Yes	Yes	Yes	Yes
Visit 2			Normal	Mouth, teeth and throat	03_011	2	Yes	10FEB16	10FEB2016	03	Entered	55	Male	11FEB16	188	MF4637	<250 mg/day	No	Yes	<250 mg/day	No	Yes	Yes	Yes	Yes
Visit 2			Normal	Neck and thyroid	03_011	2	Yes	10FEB16	10FEB2016	03	Entered	55	Male	11FEB16	188	MF4637	<250 mg/day	No	Yes	<250 mg/day	No	Yes	Yes	Yes	Yes
Visit 2			Normal	Chest	03_011	2	Yes	10FEB16	10FEB2016	03	Entered	55	Male	11FEB16	188	MF4637	<250 mg/day	No	Yes	<250 mg/day	No	Yes	Yes	Yes	Yes
Visit 2			Normal	Heart	03_011	2	Yes	10FEB16	10FEB2016	03	Entered	55	Male	11FEB16	188	MF4637	<250 mg/day	No	Yes	<250 mg/day	No	Yes	Yes	Yes	Yes
Visit 2			Normal	Abdomen	03_011	2	Yes	10FEB16	10FEB2016	03	Entered	55	Male	11FEB16	188	MF4637	<250 mg/day	No	Yes	<250 mg/day	No	Yes	Yes	Yes	Yes
Visit 2			Normal	Dermatologic	03_011	2	Yes	10FEB16	10FEB2016	03	Entered	55	Male	11FEB16	188	MF4637	<250 mg/day	No	Yes	<250 mg/day	No	Yes	Yes	Yes	Yes
Visit 2			Normal	Musculoskeletal	03_011	2	Yes	10FEB16	10FEB2016	03	Entered	55	Male	11FEB16	188	MF4637	<250 mg/day	No	Yes	<250 mg/day	No	Yes	Yes	Yes	Yes
Visit 2			Normal	Circulatory	03_011	2	Yes	10FEB16	10FEB2016	03	Entered	55	Male	11FEB16	188	MF4637	<250 mg/day	No	Yes	<250 mg/day	No	Yes	Yes	Yes	Yes
Visit 2			Normal	Neurologic	03_011	2	Yes	10FEB16	10FEB2016	03	Entered	55	Male	11FEB16	188	MF4637	<250 mg/day	No	Yes	<250 mg/day	No	Yes	Yes	Yes	Yes
Visit 2			Normal	Lymphatic	03_011	2	Yes	10FEB16	10FEB2016	03	Entered	55	Male	11FEB16	188	MF4637	<250 mg/day	No	Yes	<250 mg/day	No	Yes	Yes	Yes	Yes
Visit 2			Normal	Respiratory	03_011	2	Yes	10FEB16	10FEB2016	03	Entered	55	Male	11FEB16	188	MF4637	<250 mg/day	No	Yes	<250 mg/day	No	Yes	Yes	Yes	Yes
Visit 2			Not done	Other, specify	03_011	2	Yes	10FEB16	10FEB2016	03	Entered	55	Male	11FEB16	188	MF4637	<250 mg/day	No	Yes	<250 mg/day	No	Yes	Yes	Yes	Yes
Visit 2			Normal	General appearance	03_012	2	Yes	11FEB16	11FEB2016	03	Entered	63	Male	12FEB16	190	MF4637	<250 mg/day	No	Yes	<250 mg/day	No	Yes	Yes	Yes	Yes
Visit 2			Normal	Head, eyes, ears and nose	03_012	2	Yes	11FEB16	11FEB2016	03	Entered	63	Male	12FEB16	190	MF4637	<250 mg/day	No	Yes	<250 mg/day	No	Yes	Yes	Yes	Yes
Visit 2			Normal	Mouth, teeth and throat	03_012	2	Yes	11FEB16	11FEB2016	03	Entered	63	Male	12FEB16	190	MF4637	<250 mg/day	No	Yes	<250 mg/day	No	Yes	Yes	Yes	Yes
Visit 2			Normal	Neck and thyroid	03_012	2	Yes	11FEB16	11FEB2016	03	Entered	63	Male	12FEB16	190	MF4637	<250 mg/day	No	Yes	<250 mg/day	No	Yes	Yes	Yes	Yes
Visit 2			Normal	Chest	03_012	2	Yes	11FEB16	11FEB2016	03	Entered	63	Male	12FEB16	190	MF4637	<250 mg/day	No	Yes	<250 mg/day	No	Yes	Yes	Yes	Yes
Visit 2		HIGH BLOOD PRESSURE	Abnormal	Heart	03_012	2	Yes	11FEB16	11FEB2016	03	Entered	63	Male	12FEB16	190	MF4637	<250 mg/day	No	Yes	<250 mg/day	No	Yes	Yes	Yes	Yes
Visit 2			Normal	Abdomen	03_012	2	Yes	11FEB16	11FEB2016	03	Entered	63	Male	12FEB16	190	MF4637	<250 mg/day	No	Yes	<250 mg/day	No	Yes	Yes	Yes	Yes
Visit 2			Normal	Dermatologic	03_012	2	Yes	11FEB16	11FEB2016	03	Entered	63	Male	12FEB16	190	MF4637	<250 mg/day	No	Yes	<250 mg/day	No	Yes	Yes	Yes	Yes
Visit 2			Normal	Musculoskeletal	03_012	2	Yes	11FEB16	11FEB2016	03	Entered	63	Male	12FEB16	190	MF4637	<250 mg/day	No	Yes	<250 mg/day	No	Yes	Yes	Yes	Yes
Visit 2			Normal	Circulatory	03_012	2	Yes	11FEB16	11FEB2016	03	Entered	63	Male	12FEB16	190	MF4637	<250 mg/day	No	Yes	<250 mg/day	No	Yes	Yes	Yes	Yes
Visit 2			Normal	Neurologic	03_012	2	Yes	11FEB16	11FEB2016	03	Entered	63	Male	12FEB16	190	MF4637	<250 mg/day	No	Yes	<250 mg/day	No	Yes	Yes	Yes	Yes
Visit 2			Normal	Lymphatic	03_012	2	Yes	11FEB16	11FEB2016	03	Entered	63	Male	12FEB16	190	MF4637	<250 mg/day	No	Yes	<250 mg/day	No	Yes	Yes	Yes	Yes
Visit 2			Normal	Respiratory	03_012	2	Yes	11FEB16	11FEB2016	03	Entered	63	Male	12FEB16	190	MF4637	<250 mg/day	No	Yes	<250 mg/day	No	Yes	Yes	Yes	Yes
Visit 2			Not done	Other, specify	03_012	2	Yes	11FEB16	11FEB2016	03	Entered	63	Male	12FEB16	190	MF4637	<250 mg/day	No	Yes	<250 mg/day	No	Yes	Yes	Yes	Yes
Visit 2			Normal	General appearance	03_013	2	Yes	10FEB16	10FEB2016	03	Entered	61	Female	11FEB16	189	Placebo	<250 mg/day	No	Yes	<250 mg/day	No	Yes	Yes	Yes	Yes
Visit 2			Normal	Head, eyes, ears and nose	03_013	2	Yes	10FEB16	10FEB2016	03	Entered	61	Female	11FEB16	189	Placebo	<250 mg/day	No	Yes	<250 mg/day	No	Yes	Yes	Yes	Yes
Visit 2			Normal	Mouth, teeth and throat	03_013	2	Yes	10FEB16	10FEB2016	03	Entered	61	Female	11FEB16	189	Placebo	<250 mg/day	No	Yes	<250 mg/day	No	Yes	Yes	Yes	Yes
Visit 2			Normal	Neck and thyroid	03_013	2	Yes	10FEB16	10FEB2016	03	Entered	61	Female	11FEB16	189	Placebo	<250 mg/day	No	Yes	<250 mg/day	No	Yes	Yes	Yes	Yes
Visit 2			Normal	Chest	03_013	2	Yes	10FEB16	10FEB2016	03	Entered	61	Female	11FEB16	189	Placebo	<250 mg/day	No	Yes	<250 mg/day	No	Yes	Yes	Yes	Yes
Visit 2			Normal	Heart	03_013	2	Yes	10FEB16	10FEB2016	03	Entered	61	Female	11FEB16	189	Placebo	<250 mg/day	No	Yes	<250 mg/day	No	Yes	Yes	Yes	Yes
Visit 2			Normal	Abdomen	03_013	2	Yes	10FEB16	10FEB2016	03	Entered	61	Female	11FEB16	189	Placebo	<250 mg/day	No	Yes	<250 mg/day	No	Yes	Yes	Yes	Yes
Visit 2			Normal	Dermatologic	03_013	2	Yes	10FEB16	10FEB2016	03	Entered	61	Female	11FEB16	189	Placebo	<250 mg/day	No	Yes	<250 mg/day	No	Yes	Yes	Yes	Yes
Visit 2			Normal	Musculoskeletal	03_013	2	Yes	10FEB16	10FEB2016	03	Entered	61	Female	11FEB16	189	Placebo	<250 mg/day	No	Yes	<250 mg/day	No	Yes	Yes	Yes	Yes
Visit 2			Normal	Circulatory	03_013	2	Yes	10FEB16	10FEB2016	03	Entered	61	Female	11FEB16	189	Placebo	<250 mg/day	No	Yes	<250 mg/day	No	Yes	Yes	Yes	Yes
Visit 2			Normal	Neurologic	03_013	2	Yes	10FEB16	10FEB2016	03	Entered	61	Female	11FEB16	189	Placebo	<250 mg/day	No	Yes	<250 mg/day	No	Yes	Yes	Yes	Yes
Visit 2			Normal	Lymphatic	03_013	2	Yes	10FEB16	10FEB2016	03	Entered	61	Female	11FEB16	189	Placebo	<250 mg/day	No	Yes	<250 mg/day	No	Yes	Yes	Yes	Yes
Visit 2			Normal	Respiratory	03_013	2	Yes	10FEB16	10FEB2016	03	Entered	61	Female	11FEB16	189	Placebo	<250 mg/day	No	Yes	<250 mg/day	No	Yes	Yes	Yes	Yes
Visit 2			Not done	Other, specify	03_013	2	Yes	10FEB16	10FEB2016	03	Entered	61	Female	11FEB16	189	Placebo	<250 mg/day	No	Yes	<250 mg/day	No	Yes	Yes	Yes	Yes
Visit 2			Normal	General appearance	04_001	2	Yes	13OCT15	13OCT2015	04	Entered	49	Female	13OCT15	124	Placebo	>=250 mg/day	Yes	No	>=250 mg/day	No	Yes	Yes	Yes	Yes
Visit 2			Normal	Head, eyes, ears and nose	04_001	2	Yes	13OCT15	13OCT2015	04	Entered	49	Female	13OCT15	124	Placebo	>=250 mg/day	Yes	No	>=250 mg/day	No	Yes	Yes	Yes	Yes
Visit 2			Normal	Mouth, teeth and throat	04_001	2	Yes	13OCT15	13OCT2015	04	Entered	49	Female	13OCT15	124	Placebo	>=250 mg/day	Yes	No	>=250 mg/day	No	Yes	Yes	Yes	Yes
Visit 2			Normal	Neck and thyroid	04_001	2	Yes	13OCT15	13OCT2015	04	Entered	49	Female	13OCT15	124	Placebo	>=250 mg/day	Yes	No	>=250 mg/day	No	Yes	Yes	Yes	Yes
Visit 2			Normal	Chest	04_001	2	Yes	13OCT15	13OCT2015	04	Entered	49	Female	13OCT15	124	Placebo	>=250 mg/day	Yes	No	>=250 mg/day	No	Yes	Yes	Yes	Yes
Visit 2			Normal	Heart	04_001	2	Yes	13OCT15	13OCT2015	04	Entered	49	Female	13OCT15	124	Placebo	>=250 mg/day	Yes	No	>=250 mg/day	No	Yes	Yes	Yes	Yes
Visit 2			Normal	Abdomen	04_001	2	Yes	13OCT15	13OCT2015	04	Entered	49	Female	13OCT15	124	Placebo	>=250 mg/day	Yes	No	>=250 mg/day	No	Yes	Yes	Yes	Yes
Visit 2			Normal	Dermatologic	04_001	2	Yes	13OCT15	13OCT2015	04	Entered	49	Female	13OCT15	124	Placebo	>=250 mg/day	Yes	No	>=250 mg/day	No	Yes	Yes	Yes	Yes
Visit 2			Normal	Musculoskeletal	04_001	2	Yes	13OCT15	13OCT2015	04	Entered	49	Female	13OCT15	124	Placebo	>=250 mg/day	Yes	No	>=250 mg/day	No	Yes	Yes	Yes	Yes
Visit 2			Normal	Circulatory	04_001	2	Yes	13OCT15	13OCT2015	04	Entered	49	Female	13OCT15	124	Placebo	>=250 mg/day	Yes	No	>=250 mg/day	No	Yes	Yes	Yes	Yes
Visit 2			Normal	Neurologic	04_001	2	Yes	13OCT15	13OCT2015	04	Entered	49	Female	13OCT15	124	Placebo	>=250 mg/day	Yes	No	>=250 mg/day	No	Yes	Yes	Yes	Yes
Visit 2			Normal	Lymphatic	04_001	2	Yes	13OCT15	13OCT2015	04	Entered	49	Female	13OCT15	124	Placebo	>=250 mg/day	Yes	No	>=250 mg/day	No	Yes	Yes	Yes	Yes
Visit 2			Normal	Respiratory	04_001	2	Yes	13OCT15	13OCT2015	04	Entered	49	Female	13OCT15	124	Placebo	>=250 mg/day	Yes	No	>=250 mg/day	No	Yes	Yes	Yes	Yes
Visit 2			Not done	Other, specify	04_001	2	Yes	13OCT15	13OCT2015	04	Entered	49	Female	13OCT15	124	Placebo	>=250 mg/day	Yes	No	>=250 mg/day	No	Yes	Yes	Yes	Yes
Visit 2			Normal	General appearance	04_004	2	Yes	14OCT15	14OCT2015	04	Entered	34	Male	15OCT15	125	MF4637	<250 mg/day	No	No	<250 mg/day	No	Yes	Yes	Yes	No
Visit 2			Normal	Head, eyes, ears and nose	04_004	2	Yes	14OCT15	14OCT2015	04	Entered	34	Male	15OCT15	125	MF4637	<250 mg/day	No	No	<250 mg/day	No	Yes	Yes	Yes	No
Visit 2			Normal	Mouth, teeth and throat	04_004	2	Yes	14OCT15	14OCT2015	04	Entered	34	Male	15OCT15	125	MF4637	<250 mg/day	No	No	<250 mg/day	No	Yes	Yes	Yes	No
Visit 2			Normal	Neck and thyroid	04_004	2	Yes	14OCT15	14OCT2015	04	Entered	34	Male	15OCT15	125	MF4637	<250 mg/day	No	No	<250 mg/day	No	Yes	Yes	Yes	No
Visit 2			Normal	Chest	04_004	2	Yes	14OCT15	14OCT2015	04	Entered	34	Male	15OCT15	125	MF4637	<250 mg/day	No	No	<250 mg/day	No	Yes	Yes	Yes	No
Visit 2			Normal	Heart	04_004	2	Yes	14OCT15	14OCT2015	04	Entered	34	Male	15OCT15	125	MF4637	<250 mg/day	No	No	<250 mg/day	No	Yes	Yes	Yes	No
Visit 2			Normal	Abdomen	04_004	2	Yes	14OCT15	14OCT2015	04	Entered	34	Male	15OCT15	125	MF4637	<250 mg/day	No	No	<250 mg/day	No	Yes	Yes	Yes	No
Visit 2			Normal	Dermatologic	04_004	2	Yes	14OCT15	14OCT2015	04	Entered	34	Male	15OCT15	125	MF4637	<250 mg/day	No	No	<250 mg/day	No	Yes	Yes	Yes	No
Visit 2			Normal	Musculoskeletal	04_004	2	Yes	14OCT15	14OCT2015	04	Entered	34	Male	15OCT15	125	MF4637	<250 mg/day	No	No	<250 mg/day	No	Yes	Yes	Yes	No
Visit 2			Normal	Circulatory	04_004	2	Yes	14OCT15	14OCT2015	04	Entered	34	Male	15OCT15	125	MF4637	<250 mg/day	No	No	<250 mg/day	No	Yes	Yes	Yes	No
Visit 2			Normal	Neurologic	04_004	2	Yes	14OCT15	14OCT2015	04	Entered	34	Male	15OCT15	125	MF4637	<250 mg/day	No	No	<250 mg/day	No	Yes	Yes	Yes	No
Visit 2			Normal	Lymphatic	04_004	2	Yes	14OCT15	14OCT2015	04	Entered	34	Male	15OCT15	125	MF4637	<250 mg/day	No	No	<250 mg/day	No	Yes	Yes	Yes	No
Visit 2			Normal	Respiratory	04_004	2	Yes	14OCT15	14OCT2015	04	Entered	34	Male	15OCT15	125	MF4637	<250 mg/day	No	No	<250 mg/day	No	Yes	Yes	Yes	No
Visit 2			Not done	Other, specify	04_004	2	Yes	14OCT15	14OCT2015	04	Entered	34	Male	15OCT15	125	MF4637	<250 mg/day	No	No	<250 mg/day	No	Yes	Yes	Yes	No
Visit 2			Normal	General appearance	04_009	2	Yes	04JAN16	04JAN2016	04	Entered	53	Female	04JAN16	127	Placebo	<250 mg/day	No	No	<250 mg/day	No	Yes	Yes	Yes	Yes
Visit 2			Normal	Head, eyes, ears and nose	04_009	2	Yes	04JAN16	04JAN2016	04	Entered	53	Female	04JAN16	127	Placebo	<250 mg/day	No	No	<250 mg/day	No	Yes	Yes	Yes	Yes
Visit 2			Normal	Mouth, teeth and throat	04_009	2	Yes	04JAN16	04JAN2016	04	Entered	53	Female	04JAN16	127	Placebo	<250 mg/day	No	No	<250 mg/day	No	Yes	Yes	Yes	Yes
Visit 2			Normal	Neck and thyroid	04_009	2	Yes	04JAN16	04JAN2016	04	Entered	53	Female	04JAN16	127	Placebo	<250 mg/day	No	No	<250 mg/day	No	Yes	Yes	Yes	Yes
Visit 2			Normal	Chest	04_009	2	Yes	04JAN16	04JAN2016	04	Entered	53	Female	04JAN16	127	Placebo	<250 mg/day	No	No	<250 mg/day	No	Yes	Yes	Yes	Yes
Visit 2			Normal	Heart	04_009	2	Yes	04JAN16	04JAN2016	04	Entered	53	Female	04JAN16	127	Placebo	<250 mg/day	No	No	<250 mg/day	No	Yes	Yes	Yes	Yes
Visit 2			Normal	Abdomen	04_009	2	Yes	04JAN16	04JAN2016	04	Entered	53	Female	04JAN16	127	Placebo	<250 mg/day	No	No	<250 mg/day	No	Yes	Yes	Yes	Yes
Visit 2			Normal	Dermatologic	04_009	2	Yes	04JAN16	04JAN2016	04	Entered	53	Female	04JAN16	127	Placebo	<250 mg/day	No	No	<250 mg/day	No	Yes	Yes	Yes	Yes
Visit 2			Normal	Musculoskeletal	04_009	2	Yes	04JAN16	04JAN2016	04	Entered	53	Female	04JAN16	127	Placebo	<250 mg/day	No	No	<250 mg/day	No	Yes	Yes	Yes	Yes
Visit 2			Normal	Circulatory	04_009	2	Yes	04JAN16	04JAN2016	04	Entered	53	Female	04JAN16	127	Placebo	<250 mg/day	No	No	<250 mg/day	No	Yes	Yes	Yes	Yes
Visit 2			Normal	Neurologic	04_009	2	Yes	04JAN16	04JAN2016	04	Entered	53	Female	04JAN16	127	Placebo	<250 mg/day	No	No	<250 mg/day	No	Yes	Yes	Yes	Yes
Visit 2			Normal	Lymphatic	04_009	2	Yes	04JAN16	04JAN2016	04	Entered	53	Female	04JAN16	127	Placebo	<250 mg/day	No	No	<250 mg/day	No	Yes	Yes	Yes	Yes
Visit 2			Normal	Respiratory	04_009	2	Yes	04JAN16	04JAN2016	04	Entered	53	Female	04JAN16	127	Placebo	<250 mg/day	No	No	<250 mg/day	No	Yes	Yes	Yes	Yes
Visit 2			Not done	Other, specify	04_009	2	Yes	04JAN16	04JAN2016	04	Entered	53	Female	04JAN16	127	Placebo	<250 mg/day	No	No	<250 mg/day	No	Yes	Yes	Yes	Yes
Visit 2			Normal	General appearance	04_010	2	Yes	05JAN16	05JAN2016	04	Entered	25	Female	05JAN16	126	MF4637	>=250 mg/day	No	No	>=250 mg/day	No	Yes	Yes	Yes	Yes
Visit 2			Normal	Head, eyes, ears and nose	04_010	2	Yes	05JAN16	05JAN2016	04	Entered	25	Female	05JAN16	126	MF4637	>=250 mg/day	No	No	>=250 mg/day	No	Yes	Yes	Yes	Yes
Visit 2			Normal	Mouth, teeth and throat	04_010	2	Yes	05JAN16	05JAN2016	04	Entered	25	Female	05JAN16	126	MF4637	>=250 mg/day	No	No	>=250 mg/day	No	Yes	Yes	Yes	Yes
Visit 2			Normal	Neck and thyroid	04_010	2	Yes	05JAN16	05JAN2016	04	Entered	25	Female	05JAN16	126	MF4637	>=250 mg/day	No	No	>=250 mg/day	No	Yes	Yes	Yes	Yes
Visit 2			Normal	Chest	04_010	2	Yes	05JAN16	05JAN2016	04	Entered	25	Female	05JAN16	126	MF4637	>=250 mg/day	No	No	>=250 mg/day	No	Yes	Yes	Yes	Yes
Visit 2			Normal	Heart	04_010	2	Yes	05JAN16	05JAN2016	04	Entered	25	Female	05JAN16	126	MF4637	>=250 mg/day	No	No	>=250 mg/day	No	Yes	Yes	Yes	Yes
Visit 2		RUD tenderness	Abnormal	Abdomen	04_010	2	Yes	05JAN16	05JAN2016	04	Entered	25	Female	05JAN16	126	MF4637	>=250 mg/day	No	No	>=250 mg/day	No	Yes	Yes	Yes	Yes
Visit 2			Normal	Dermatologic	04_010	2	Yes	05JAN16	05JAN2016	04	Entered	25	Female	05JAN16	126	MF4637	>=250 mg/day	No	No	>=250 mg/day	No	Yes	Yes	Yes	Yes
Visit 2			Normal	Musculoskeletal	04_010	2	Yes	05JAN16	05JAN2016	04	Entered	25	Female	05JAN16	126	MF4637	>=250 mg/day	No	No	>=250 mg/day	No	Yes	Yes	Yes	Yes
Visit 2			Normal	Circulatory	04_010	2	Yes	05JAN16	05JAN2016	04	Entered	25	Female	05JAN16	126	MF4637	>=250 mg/day	No	No	>=250 mg/day	No	Yes	Yes	Yes	Yes
Visit 2			Normal	Neurologic	04_010	2	Yes	05JAN16	05JAN2016	04	Entered	25	Female	05JAN16	126	MF4637	>=250 mg/day	No	No	>=250 mg/day	No	Yes	Yes	Yes	Yes
Visit 2			Normal	Lymphatic	04_010	2	Yes	05JAN16	05JAN2016	04	Entered	25	Female	05JAN16	126	MF4637	>=250 mg/day	No	No	>=250 mg/day	No	Yes	Yes	Yes	Yes
Visit 2			Normal	Respiratory	04_010	2	Yes	05JAN16	05JAN2016	04	Entered	25	Female	05JAN16	126	MF4637	>=250 mg/day	No	No	>=250 mg/day	No	Yes	Yes	Yes	Yes
Visit 2			Not done	Other, specify	04_010	2	Yes	05JAN16	05JAN2016	04	Entered	25	Female	05JAN16	126	MF4637	>=250 mg/day	No	No	>=250 mg/day	No	Yes	Yes	Yes	Yes
Visit 2			Normal	General appearance	04_011	2	Yes	26JAN16	26JAN2016	04	Entered	41	Male	26JAN16	129	Placebo	>=250 mg/day	No	No	>=250 mg/day	No	Yes	Yes	Yes	Yes
Visit 2			Normal	Head, eyes, ears and nose	04_011	2	Yes	26JAN16	26JAN2016	04	Entered	41	Male	26JAN16	129	Placebo	>=250 mg/day	No	No	>=250 mg/day	No	Yes	Yes	Yes	Yes
Visit 2			Normal	Mouth, teeth and throat	04_011	2	Yes	26JAN16	26JAN2016	04	Entered	41	Male	26JAN16	129	Placebo	>=250 mg/day	No	No	>=250 mg/day	No	Yes	Yes	Yes	Yes
Visit 2			Normal	Neck and thyroid	04_011	2	Yes	26JAN16	26JAN2016	04	Entered	41	Male	26JAN16	129	Placebo	>=250 mg/day	No	No	>=250 mg/day	No	Yes	Yes	Yes	Yes
Visit 2			Normal	Chest	04_011	2	Yes	26JAN16	26JAN2016	04	Entered	41	Male	26JAN16	129	Placebo	>=250 mg/day	No	No	>=250 mg/day	No	Yes	Yes	Yes	Yes
Visit 2			Normal	Heart	04_011	2	Yes	26JAN16	26JAN2016	04	Entered	41	Male	26JAN16	129	Placebo	>=250 mg/day	No	No	>=250 mg/day	No	Yes	Yes	Yes	Yes
Visit 2			Normal	Abdomen	04_011	2	Yes	26JAN16	26JAN2016	04	Entered	41	Male	26JAN16	129	Placebo	>=250 mg/day	No	No	>=250 mg/day	No	Yes	Yes	Yes	Yes
Visit 2			Normal	Dermatologic	04_011	2	Yes	26JAN16	26JAN2016	04	Entered	41	Male	26JAN16	129	Placebo	>=250 mg/day	No	No	>=250 mg/day	No	Yes	Yes	Yes	Yes
Visit 2			Normal	Musculoskeletal	04_011	2	Yes	26JAN16	26JAN2016	04	Entered	41	Male	26JAN16	129	Placebo	>=250 mg/day	No	No	>=250 mg/day	No	Yes	Yes	Yes	Yes
Visit 2			Normal	Circulatory	04_011	2	Yes	26JAN16	26JAN2016	04	Entered	41	Male	26JAN16	129	Placebo	>=250 mg/day	No	No	>=250 mg/day	No	Yes	Yes	Yes	Yes
Visit 2			Normal	Neurologic	04_011	2	Yes	26JAN16	26JAN2016	04	Entered	41	Male	26JAN16	129	Placebo	>=250 mg/day	No	No	>=250 mg/day	No	Yes	Yes	Yes	Yes
Visit 2			Normal	Lymphatic	04_011	2	Yes	26JAN16	26JAN2016	04	Entered	41	Male	26JAN16	129	Placebo	>=250 mg/day	No	No	>=250 mg/day	No	Yes	Yes	Yes	Yes
Visit 2			Normal	Respiratory	04_011	2	Yes	26JAN16	26JAN2016	04	Entered	41	Male	26JAN16	129	Placebo	>=250 mg/day	No	No	>=250 mg/day	No	Yes	Yes	Yes	Yes
Visit 2			Not done	Other, specify	04_011	2	Yes	26JAN16	26JAN2016	04	Entered	41	Male	26JAN16	129	Placebo	>=250 mg/day	No	No	>=250 mg/day	No	Yes	Yes	Yes	Yes
Visit 2		Obese	Abnormal	General appearance	04_012	2	Yes	18JAN16	18JAN2016	04	Entered	19	Male	19JAN16	128	Placebo	<250 mg/day	No	No	<250 mg/day	No	Yes	Yes	Yes	Yes
Visit 2			Normal	Head, eyes, ears and nose	04_012	2	Yes	18JAN16	18JAN2016	04	Entered	19	Male	19JAN16	128	Placebo	<250 mg/day	No	No	<250 mg/day	No	Yes	Yes	Yes	Yes
Visit 2			Normal	Mouth, teeth and throat	04_012	2	Yes	18JAN16	18JAN2016	04	Entered	19	Male	19JAN16	128	Placebo	<250 mg/day	No	No	<250 mg/day	No	Yes	Yes	Yes	Yes
Visit 2			Normal	Neck and thyroid	04_012	2	Yes	18JAN16	18JAN2016	04	Entered	19	Male	19JAN16	128	Placebo	<250 mg/day	No	No	<250 mg/day	No	Yes	Yes	Yes	Yes
Visit 2			Normal	Chest	04_012	2	Yes	18JAN16	18JAN2016	04	Entered	19	Male	19JAN16	128	Placebo	<250 mg/day	No	No	<250 mg/day	No	Yes	Yes	Yes	Yes
Visit 2			Normal	Heart	04_012	2	Yes	18JAN16	18JAN2016	04	Entered	19	Male	19JAN16	128	Placebo	<250 mg/day	No	No	<250 mg/day	No	Yes	Yes	Yes	Yes
Visit 2		Increased abdominal adiposity	Abnormal	Abdomen	04_012	2	Yes	18JAN16	18JAN2016	04	Entered	19	Male	19JAN16	128	Placebo	<250 mg/day	No	No	<250 mg/day	No	Yes	Yes	Yes	Yes
Visit 2			Normal	Dermatologic	04_012	2	Yes	18JAN16	18JAN2016	04	Entered	19	Male	19JAN16	128	Placebo	<250 mg/day	No	No	<250 mg/day	No	Yes	Yes	Yes	Yes
Visit 2			Normal	Musculoskeletal	04_012	2	Yes	18JAN16	18JAN2016	04	Entered	19	Male	19JAN16	128	Placebo	<250 mg/day	No	No	<250 mg/day	No	Yes	Yes	Yes	Yes
Visit 2			Normal	Circulatory	04_012	2	Yes	18JAN16	18JAN2016	04	Entered	19	Male	19JAN16	128	Placebo	<250 mg/day	No	No	<250 mg/day	No	Yes	Yes	Yes	Yes
Visit 2			Normal	Neurologic	04_012	2	Yes	18JAN16	18JAN2016	04	Entered	19	Male	19JAN16	128	Placebo	<250 mg/day	No	No	<250 mg/day	No	Yes	Yes	Yes	Yes
Visit 2			Normal	Lymphatic	04_012	2	Yes	18JAN16	18JAN2016	04	Entered	19	Male	19JAN16	128	Placebo	<250 mg/day	No	No	<250 mg/day	No	Yes	Yes	Yes	Yes
Visit 2			Normal	Respiratory	04_012	2	Yes	18JAN16	18JAN2016	04	Entered	19	Male	19JAN16	128	Placebo	<250 mg/day	No	No	<250 mg/day	No	Yes	Yes	Yes	Yes
Visit 2			Not done	Other, specify	04_012	2	Yes	18JAN16	18JAN2016	04	Entered	19	Male	19JAN16	128	Placebo	<250 mg/day	No	No	<250 mg/day	No	Yes	Yes	Yes	Yes
Visit 2		OBESITY	Abnormal	General appearance	04_013	2	Yes	15FEB16	15FEB2016	04	Entered	64	Female	15FEB16	130	MF4637	<250 mg/day	No	Yes	<250 mg/day	No	Yes	Yes	Yes	Yes
Visit 2			Normal	Head, eyes, ears and nose	04_013	2	Yes	15FEB16	15FEB2016	04	Entered	64	Female	15FEB16	130	MF4637	<250 mg/day	No	Yes	<250 mg/day	No	Yes	Yes	Yes	Yes
Visit 2			Normal	Mouth, teeth and throat	04_013	2	Yes	15FEB16	15FEB2016	04	Entered	64	Female	15FEB16	130	MF4637	<250 mg/day	No	Yes	<250 mg/day	No	Yes	Yes	Yes	Yes
Visit 2			Normal	Neck and thyroid	04_013	2	Yes	15FEB16	15FEB2016	04	Entered	64	Female	15FEB16	130	MF4637	<250 mg/day	No	Yes	<250 mg/day	No	Yes	Yes	Yes	Yes
Visit 2			Normal	Chest	04_013	2	Yes	15FEB16	15FEB2016	04	Entered	64	Female	15FEB16	130	MF4637	<250 mg/day	No	Yes	<250 mg/day	No	Yes	Yes	Yes	Yes
Visit 2			Normal	Heart	04_013	2	Yes	15FEB16	15FEB2016	04	Entered	64	Female	15FEB16	130	MF4637	<250 mg/day	No	Yes	<250 mg/day	No	Yes	Yes	Yes	Yes
Visit 2		INCREASED ADIPOSITY	Abnormal	Abdomen	04_013	2	Yes	15FEB16	15FEB2016	04	Entered	64	Female	15FEB16	130	MF4637	<250 mg/day	No	Yes	<250 mg/day	No	Yes	Yes	Yes	Yes
Visit 2			Normal	Dermatologic	04_013	2	Yes	15FEB16	15FEB2016	04	Entered	64	Female	15FEB16	130	MF4637	<250 mg/day	No	Yes	<250 mg/day	No	Yes	Yes	Yes	Yes
Visit 2			Normal	Musculoskeletal	04_013	2	Yes	15FEB16	15FEB2016	04	Entered	64	Female	15FEB16	130	MF4637	<250 mg/day	No	Yes	<250 mg/day	No	Yes	Yes	Yes	Yes
Visit 2			Normal	Circulatory	04_013	2	Yes	15FEB16	15FEB2016	04	Entered	64	Female	15FEB16	130	MF4637	<250 mg/day	No	Yes	<250 mg/day	No	Yes	Yes	Yes	Yes
Visit 2			Normal	Neurologic	04_013	2	Yes	15FEB16	15FEB2016	04	Entered	64	Female	15FEB16	130	MF4637	<250 mg/day	No	Yes	<250 mg/day	No	Yes	Yes	Yes	Yes
Visit 2			Normal	Lymphatic	04_013	2	Yes	15FEB16	15FEB2016	04	Entered	64	Female	15FEB16	130	MF4637	<250 mg/day	No	Yes	<250 mg/day	No	Yes	Yes	Yes	Yes
Visit 2			Normal	Respiratory	04_013	2	Yes	15FEB16	15FEB2016	04	Entered	64	Female	15FEB16	130	MF4637	<250 mg/day	No	Yes	<250 mg/day	No	Yes	Yes	Yes	Yes
Visit 2			Not done	Other, specify	04_013	2	Yes	15FEB16	15FEB2016	04	Entered	64	Female	15FEB16	130	MF4637	<250 mg/day	No	Yes	<250 mg/day	No	Yes	Yes	Yes	Yes
Visit 2			Normal	General appearance	04_014	2	Yes	25FEB16	25FEB2016	04	Entered	35	Female	25FEB16	131	MF4637	>=250 mg/day	No	No	>=250 mg/day	No	Yes	Yes	Yes	Yes
Visit 2			Normal	Head, eyes, ears and nose	04_014	2	Yes	25FEB16	25FEB2016	04	Entered	35	Female	25FEB16	131	MF4637	>=250 mg/day	No	No	>=250 mg/day	No	Yes	Yes	Yes	Yes
Visit 2			Normal	Mouth, teeth and throat	04_014	2	Yes	25FEB16	25FEB2016	04	Entered	35	Female	25FEB16	131	MF4637	>=250 mg/day	No	No	>=250 mg/day	No	Yes	Yes	Yes	Yes
Visit 2			Normal	Neck and thyroid	04_014	2	Yes	25FEB16	25FEB2016	04	Entered	35	Female	25FEB16	131	MF4637	>=250 mg/day	No	No	>=250 mg/day	No	Yes	Yes	Yes	Yes
Visit 2			Normal	Chest	04_014	2	Yes	25FEB16	25FEB2016	04	Entered	35	Female	25FEB16	131	MF4637	>=250 mg/day	No	No	>=250 mg/day	No	Yes	Yes	Yes	Yes
Visit 2			Normal	Heart	04_014	2	Yes	25FEB16	25FEB2016	04	Entered	35	Female	25FEB16	131	MF4637	>=250 mg/day	No	No	>=250 mg/day	No	Yes	Yes	Yes	Yes
Visit 2			Normal	Abdomen	04_014	2	Yes	25FEB16	25FEB2016	04	Entered	35	Female	25FEB16	131	MF4637	>=250 mg/day	No	No	>=250 mg/day	No	Yes	Yes	Yes	Yes
Visit 2			Normal	Dermatologic	04_014	2	Yes	25FEB16	25FEB2016	04	Entered	35	Female	25FEB16	131	MF4637	>=250 mg/day	No	No	>=250 mg/day	No	Yes	Yes	Yes	Yes
Visit 2			Normal	Musculoskeletal	04_014	2	Yes	25FEB16	25FEB2016	04	Entered	35	Female	25FEB16	131	MF4637	>=250 mg/day	No	No	>=250 mg/day	No	Yes	Yes	Yes	Yes
Visit 2			Normal	Circulatory	04_014	2	Yes	25FEB16	25FEB2016	04	Entered	35	Female	25FEB16	131	MF4637	>=250 mg/day	No	No	>=250 mg/day	No	Yes	Yes	Yes	Yes
Visit 2			Normal	Neurologic	04_014	2	Yes	25FEB16	25FEB2016	04	Entered	35	Female	25FEB16	131	MF4637	>=250 mg/day	No	No	>=250 mg/day	No	Yes	Yes	Yes	Yes
Visit 2			Normal	Lymphatic	04_014	2	Yes	25FEB16	25FEB2016	04	Entered	35	Female	25FEB16	131	MF4637	>=250 mg/day	No	No	>=250 mg/day	No	Yes	Yes	Yes	Yes
Visit 2			Normal	Respiratory	04_014	2	Yes	25FEB16	25FEB2016	04	Entered	35	Female	25FEB16	131	MF4637	>=250 mg/day	No	No	>=250 mg/day	No	Yes	Yes	Yes	Yes
Visit 2			Not done	Other, specify	04_014	2	Yes	25FEB16	25FEB2016	04	Entered	35	Female	25FEB16	131	MF4637	>=250 mg/day	No	No	>=250 mg/day	No	Yes	Yes	Yes	Yes
Visit 2			Normal	General appearance	04_015	2	Yes	21MAR16	21MAR2016	04	Entered	50	Male	21MAR16	198	Placebo	<250 mg/day	No	Yes	<250 mg/day	No	Yes	Yes	Yes	No
Visit 2			Normal	Head, eyes, ears and nose	04_015	2	Yes	21MAR16	21MAR2016	04	Entered	50	Male	21MAR16	198	Placebo	<250 mg/day	No	Yes	<250 mg/day	No	Yes	Yes	Yes	No
Visit 2			Normal	Mouth, teeth and throat	04_015	2	Yes	21MAR16	21MAR2016	04	Entered	50	Male	21MAR16	198	Placebo	<250 mg/day	No	Yes	<250 mg/day	No	Yes	Yes	Yes	No
Visit 2			Normal	Neck and thyroid	04_015	2	Yes	21MAR16	21MAR2016	04	Entered	50	Male	21MAR16	198	Placebo	<250 mg/day	No	Yes	<250 mg/day	No	Yes	Yes	Yes	No
Visit 2			Normal	Chest	04_015	2	Yes	21MAR16	21MAR2016	04	Entered	50	Male	21MAR16	198	Placebo	<250 mg/day	No	Yes	<250 mg/day	No	Yes	Yes	Yes	No
Visit 2			Normal	Heart	04_015	2	Yes	21MAR16	21MAR2016	04	Entered	50	Male	21MAR16	198	Placebo	<250 mg/day	No	Yes	<250 mg/day	No	Yes	Yes	Yes	No
Visit 2			Normal	Abdomen	04_015	2	Yes	21MAR16	21MAR2016	04	Entered	50	Male	21MAR16	198	Placebo	<250 mg/day	No	Yes	<250 mg/day	No	Yes	Yes	Yes	No
Visit 2			Normal	Dermatologic	04_015	2	Yes	21MAR16	21MAR2016	04	Entered	50	Male	21MAR16	198	Placebo	<250 mg/day	No	Yes	<250 mg/day	No	Yes	Yes	Yes	No
Visit 2			Normal	Musculoskeletal	04_015	2	Yes	21MAR16	21MAR2016	04	Entered	50	Male	21MAR16	198	Placebo	<250 mg/day	No	Yes	<250 mg/day	No	Yes	Yes	Yes	No
Visit 2			Normal	Circulatory	04_015	2	Yes	21MAR16	21MAR2016	04	Entered	50	Male	21MAR16	198	Placebo	<250 mg/day	No	Yes	<250 mg/day	No	Yes	Yes	Yes	No
Visit 2			Normal	Neurologic	04_015	2	Yes	21MAR16	21MAR2016	04	Entered	50	Male	21MAR16	198	Placebo	<250 mg/day	No	Yes	<250 mg/day	No	Yes	Yes	Yes	No
Visit 2			Normal	Lymphatic	04_015	2	Yes	21MAR16	21MAR2016	04	Entered	50	Male	21MAR16	198	Placebo	<250 mg/day	No	Yes	<250 mg/day	No	Yes	Yes	Yes	No
Visit 2			Normal	Respiratory	04_015	2	Yes	21MAR16	21MAR2016	04	Entered	50	Male	21MAR16	198	Placebo	<250 mg/day	No	Yes	<250 mg/day	No	Yes	Yes	Yes	No
Visit 2			Not done	Other, specify	04_015	2	Yes	21MAR16	21MAR2016	04	Entered	50	Male	21MAR16	198	Placebo	<250 mg/day	No	Yes	<250 mg/day	No	Yes	Yes	Yes	No
Visit 2			Normal	General appearance	04_018	2	Yes	02AUG16	02AUG2016	04	Early Termination	37	Male		197	MF4637	<250 mg/day	No	No	<250 mg/day	No	No	Yes	No	No
Visit 2			Normal	Head, eyes, ears and nose	04_018	2	Yes	02AUG16	02AUG2016	04	Early Termination	37	Male		197	MF4637	<250 mg/day	No	No	<250 mg/day	No	No	Yes	No	No
Visit 2			Normal	Mouth, teeth and throat	04_018	2	Yes	02AUG16	02AUG2016	04	Early Termination	37	Male		197	MF4637	<250 mg/day	No	No	<250 mg/day	No	No	Yes	No	No
Visit 2			Normal	Neck and thyroid	04_018	2	Yes	02AUG16	02AUG2016	04	Early Termination	37	Male		197	MF4637	<250 mg/day	No	No	<250 mg/day	No	No	Yes	No	No
Visit 2			Normal	Chest	04_018	2	Yes	02AUG16	02AUG2016	04	Early Termination	37	Male		197	MF4637	<250 mg/day	No	No	<250 mg/day	No	No	Yes	No	No
Visit 2			Normal	Heart	04_018	2	Yes	02AUG16	02AUG2016	04	Early Termination	37	Male		197	MF4637	<250 mg/day	No	No	<250 mg/day	No	No	Yes	No	No
Visit 2			Normal	Abdomen	04_018	2	Yes	02AUG16	02AUG2016	04	Early Termination	37	Male		197	MF4637	<250 mg/day	No	No	<250 mg/day	No	No	Yes	No	No
Visit 2			Normal	Dermatologic	04_018	2	Yes	02AUG16	02AUG2016	04	Early Termination	37	Male		197	MF4637	<250 mg/day	No	No	<250 mg/day	No	No	Yes	No	No
Visit 2			Normal	Musculoskeletal	04_018	2	Yes	02AUG16	02AUG2016	04	Early Termination	37	Male		197	MF4637	<250 mg/day	No	No	<250 mg/day	No	No	Yes	No	No
Visit 2			Normal	Circulatory	04_018	2	Yes	02AUG16	02AUG2016	04	Early Termination	37	Male		197	MF4637	<250 mg/day	No	No	<250 mg/day	No	No	Yes	No	No
Visit 2			Normal	Neurologic	04_018	2	Yes	02AUG16	02AUG2016	04	Early Termination	37	Male		197	MF4637	<250 mg/day	No	No	<250 mg/day	No	No	Yes	No	No
Visit 2			Normal	Lymphatic	04_018	2	Yes	02AUG16	02AUG2016	04	Early Termination	37	Male		197	MF4637	<250 mg/day	No	No	<250 mg/day	No	No	Yes	No	No
Visit 2			Normal	Respiratory	04_018	2	Yes	02AUG16	02AUG2016	04	Early Termination	37	Male		197	MF4637	<250 mg/day	No	No	<250 mg/day	No	No	Yes	No	No
Visit 2			Not done	Other, specify	04_018	2	Yes	02AUG16	02AUG2016	04	Early Termination	37	Male		197	MF4637	<250 mg/day	No	No	<250 mg/day	No	No	Yes	No	No
Visit 2			Normal	General appearance	04_019	2	Yes	02AUG16	02AUG2016	04	Early Termination	50	Female		200	Placebo	<250 mg/day	No	No	<250 mg/day	No	No	Yes	No	No
Visit 2			Normal	Head, eyes, ears and nose	04_019	2	Yes	02AUG16	02AUG2016	04	Early Termination	50	Female		200	Placebo	<250 mg/day	No	No	<250 mg/day	No	No	Yes	No	No
Visit 2			Normal	Mouth, teeth and throat	04_019	2	Yes	02AUG16	02AUG2016	04	Early Termination	50	Female		200	Placebo	<250 mg/day	No	No	<250 mg/day	No	No	Yes	No	No
Visit 2			Normal	Neck and thyroid	04_019	2	Yes	02AUG16	02AUG2016	04	Early Termination	50	Female		200	Placebo	<250 mg/day	No	No	<250 mg/day	No	No	Yes	No	No
Visit 2			Normal	Chest	04_019	2	Yes	02AUG16	02AUG2016	04	Early Termination	50	Female		200	Placebo	<250 mg/day	No	No	<250 mg/day	No	No	Yes	No	No
Visit 2			Normal	Heart	04_019	2	Yes	02AUG16	02AUG2016	04	Early Termination	50	Female		200	Placebo	<250 mg/day	No	No	<250 mg/day	No	No	Yes	No	No
Visit 2			Normal	Abdomen	04_019	2	Yes	02AUG16	02AUG2016	04	Early Termination	50	Female		200	Placebo	<250 mg/day	No	No	<250 mg/day	No	No	Yes	No	No
Visit 2			Normal	Dermatologic	04_019	2	Yes	02AUG16	02AUG2016	04	Early Termination	50	Female		200	Placebo	<250 mg/day	No	No	<250 mg/day	No	No	Yes	No	No
Visit 2			Normal	Musculoskeletal	04_019	2	Yes	02AUG16	02AUG2016	04	Early Termination	50	Female		200	Placebo	<250 mg/day	No	No	<250 mg/day	No	No	Yes	No	No
Visit 2			Normal	Circulatory	04_019	2	Yes	02AUG16	02AUG2016	04	Early Termination	50	Female		200	Placebo	<250 mg/day	No	No	<250 mg/day	No	No	Yes	No	No
Visit 2			Normal	Neurologic	04_019	2	Yes	02AUG16	02AUG2016	04	Early Termination	50	Female		200	Placebo	<250 mg/day	No	No	<250 mg/day	No	No	Yes	No	No
Visit 2			Normal	Lymphatic	04_019	2	Yes	02AUG16	02AUG2016	04	Early Termination	50	Female		200	Placebo	<250 mg/day	No	No	<250 mg/day	No	No	Yes	No	No
Visit 2			Normal	Respiratory	04_019	2	Yes	02AUG16	02AUG2016	04	Early Termination	50	Female		200	Placebo	<250 mg/day	No	No	<250 mg/day	No	No	Yes	No	No
Visit 2			Not done	Other, specify	04_019	2	Yes	02AUG16	02AUG2016	04	Early Termination	50	Female		200	Placebo	<250 mg/day	No	No	<250 mg/day	No	No	Yes	No	No
Visit 2			Normal	General appearance	04_020	2	Yes	27JUL16	27JUL2016	04	Entered	44	Male	28JUL16	196	MF4637	<250 mg/day	Yes	No	<250 mg/day	No	Yes	Yes	Yes	Yes
Visit 2		LEFT EYE CORNEAL OPACITIES AND BLINDNESS	Abnormal	Head, eyes, ears and nose	04_020	2	Yes	27JUL16	27JUL2016	04	Entered	44	Male	28JUL16	196	MF4637	<250 mg/day	Yes	No	<250 mg/day	No	Yes	Yes	Yes	Yes
Visit 2			Normal	Mouth, teeth and throat	04_020	2	Yes	27JUL16	27JUL2016	04	Entered	44	Male	28JUL16	196	MF4637	<250 mg/day	Yes	No	<250 mg/day	No	Yes	Yes	Yes	Yes
Visit 2			Normal	Neck and thyroid	04_020	2	Yes	27JUL16	27JUL2016	04	Entered	44	Male	28JUL16	196	MF4637	<250 mg/day	Yes	No	<250 mg/day	No	Yes	Yes	Yes	Yes
Visit 2			Normal	Chest	04_020	2	Yes	27JUL16	27JUL2016	04	Entered	44	Male	28JUL16	196	MF4637	<250 mg/day	Yes	No	<250 mg/day	No	Yes	Yes	Yes	Yes
Visit 2			Normal	Heart	04_020	2	Yes	27JUL16	27JUL2016	04	Entered	44	Male	28JUL16	196	MF4637	<250 mg/day	Yes	No	<250 mg/day	No	Yes	Yes	Yes	Yes
Visit 2			Normal	Abdomen	04_020	2	Yes	27JUL16	27JUL2016	04	Entered	44	Male	28JUL16	196	MF4637	<250 mg/day	Yes	No	<250 mg/day	No	Yes	Yes	Yes	Yes
Visit 2			Normal	Dermatologic	04_020	2	Yes	27JUL16	27JUL2016	04	Entered	44	Male	28JUL16	196	MF4637	<250 mg/day	Yes	No	<250 mg/day	No	Yes	Yes	Yes	Yes
Visit 2			Normal	Musculoskeletal	04_020	2	Yes	27JUL16	27JUL2016	04	Entered	44	Male	28JUL16	196	MF4637	<250 mg/day	Yes	No	<250 mg/day	No	Yes	Yes	Yes	Yes
Visit 2			Normal	Circulatory	04_020	2	Yes	27JUL16	27JUL2016	04	Entered	44	Male	28JUL16	196	MF4637	<250 mg/day	Yes	No	<250 mg/day	No	Yes	Yes	Yes	Yes
Visit 2			Normal	Neurologic	04_020	2	Yes	27JUL16	27JUL2016	04	Entered	44	Male	28JUL16	196	MF4637	<250 mg/day	Yes	No	<250 mg/day	No	Yes	Yes	Yes	Yes
Visit 2			Normal	Lymphatic	04_020	2	Yes	27JUL16	27JUL2016	04	Entered	44	Male	28JUL16	196	MF4637	<250 mg/day	Yes	No	<250 mg/day	No	Yes	Yes	Yes	Yes
Visit 2			Normal	Respiratory	04_020	2	Yes	27JUL16	27JUL2016	04	Entered	44	Male	28JUL16	196	MF4637	<250 mg/day	Yes	No	<250 mg/day	No	Yes	Yes	Yes	Yes
Visit 2			Not done	Other, specify	04_020	2	Yes	27JUL16	27JUL2016	04	Entered	44	Male	28JUL16	196	MF4637	<250 mg/day	Yes	No	<250 mg/day	No	Yes	Yes	Yes	Yes
Visit 2			Normal	General appearance	04_022	2	Yes	28JUL16	28JUL2016	04	Entered	44	Female	28JUL16	199	Placebo	>=250 mg/day	No	No	>=250 mg/day	No	Yes	Yes	Yes	Yes
Visit 2			Normal	Head, eyes, ears and nose	04_022	2	Yes	28JUL16	28JUL2016	04	Entered	44	Female	28JUL16	199	Placebo	>=250 mg/day	No	No	>=250 mg/day	No	Yes	Yes	Yes	Yes
Visit 2			Normal	Mouth, teeth and throat	04_022	2	Yes	28JUL16	28JUL2016	04	Entered	44	Female	28JUL16	199	Placebo	>=250 mg/day	No	No	>=250 mg/day	No	Yes	Yes	Yes	Yes
Visit 2			Normal	Neck and thyroid	04_022	2	Yes	28JUL16	28JUL2016	04	Entered	44	Female	28JUL16	199	Placebo	>=250 mg/day	No	No	>=250 mg/day	No	Yes	Yes	Yes	Yes
Visit 2			Normal	Chest	04_022	2	Yes	28JUL16	28JUL2016	04	Entered	44	Female	28JUL16	199	Placebo	>=250 mg/day	No	No	>=250 mg/day	No	Yes	Yes	Yes	Yes
Visit 2			Normal	Heart	04_022	2	Yes	28JUL16	28JUL2016	04	Entered	44	Female	28JUL16	199	Placebo	>=250 mg/day	No	No	>=250 mg/day	No	Yes	Yes	Yes	Yes
Visit 2			Normal	Abdomen	04_022	2	Yes	28JUL16	28JUL2016	04	Entered	44	Female	28JUL16	199	Placebo	>=250 mg/day	No	No	>=250 mg/day	No	Yes	Yes	Yes	Yes
Visit 2			Normal	Dermatologic	04_022	2	Yes	28JUL16	28JUL2016	04	Entered	44	Female	28JUL16	199	Placebo	>=250 mg/day	No	No	>=250 mg/day	No	Yes	Yes	Yes	Yes
Visit 2			Normal	Musculoskeletal	04_022	2	Yes	28JUL16	28JUL2016	04	Entered	44	Female	28JUL16	199	Placebo	>=250 mg/day	No	No	>=250 mg/day	No	Yes	Yes	Yes	Yes
Visit 2			Normal	Circulatory	04_022	2	Yes	28JUL16	28JUL2016	04	Entered	44	Female	28JUL16	199	Placebo	>=250 mg/day	No	No	>=250 mg/day	No	Yes	Yes	Yes	Yes
Visit 2			Normal	Neurologic	04_022	2	Yes	28JUL16	28JUL2016	04	Entered	44	Female	28JUL16	199	Placebo	>=250 mg/day	No	No	>=250 mg/day	No	Yes	Yes	Yes	Yes
Visit 2			Normal	Lymphatic	04_022	2	Yes	28JUL16	28JUL2016	04	Entered	44	Female	28JUL16	199	Placebo	>=250 mg/day	No	No	>=250 mg/day	No	Yes	Yes	Yes	Yes
Visit 2			Normal	Respiratory	04_022	2	Yes	28JUL16	28JUL2016	04	Entered	44	Female	28JUL16	199	Placebo	>=250 mg/day	No	No	>=250 mg/day	No	Yes	Yes	Yes	Yes
Visit 2			Not done	Other, specify	04_022	2	Yes	28JUL16	28JUL2016	04	Entered	44	Female	28JUL16	199	Placebo	>=250 mg/day	No	No	>=250 mg/day	No	Yes	Yes	Yes	Yes
Visit 2			Normal	General appearance	04_023	2	Yes	17AUG16	17AUG2016	04	Entered	56	Male	17AUG16	202	MF4637	>=250 mg/day	No	No	>=250 mg/day	No	Yes	Yes	Yes	Yes
Visit 2			Normal	Head, eyes, ears and nose	04_023	2	Yes	17AUG16	17AUG2016	04	Entered	56	Male	17AUG16	202	MF4637	>=250 mg/day	No	No	>=250 mg/day	No	Yes	Yes	Yes	Yes
Visit 2			Normal	Mouth, teeth and throat	04_023	2	Yes	17AUG16	17AUG2016	04	Entered	56	Male	17AUG16	202	MF4637	>=250 mg/day	No	No	>=250 mg/day	No	Yes	Yes	Yes	Yes
Visit 2			Normal	Neck and thyroid	04_023	2	Yes	17AUG16	17AUG2016	04	Entered	56	Male	17AUG16	202	MF4637	>=250 mg/day	No	No	>=250 mg/day	No	Yes	Yes	Yes	Yes
Visit 2			Normal	Chest	04_023	2	Yes	17AUG16	17AUG2016	04	Entered	56	Male	17AUG16	202	MF4637	>=250 mg/day	No	No	>=250 mg/day	No	Yes	Yes	Yes	Yes
Visit 2			Normal	Heart	04_023	2	Yes	17AUG16	17AUG2016	04	Entered	56	Male	17AUG16	202	MF4637	>=250 mg/day	No	No	>=250 mg/day	No	Yes	Yes	Yes	Yes
Visit 2			Normal	Abdomen	04_023	2	Yes	17AUG16	17AUG2016	04	Entered	56	Male	17AUG16	202	MF4637	>=250 mg/day	No	No	>=250 mg/day	No	Yes	Yes	Yes	Yes
Visit 2			Normal	Dermatologic	04_023	2	Yes	17AUG16	17AUG2016	04	Entered	56	Male	17AUG16	202	MF4637	>=250 mg/day	No	No	>=250 mg/day	No	Yes	Yes	Yes	Yes
Visit 2			Normal	Musculoskeletal	04_023	2	Yes	17AUG16	17AUG2016	04	Entered	56	Male	17AUG16	202	MF4637	>=250 mg/day	No	No	>=250 mg/day	No	Yes	Yes	Yes	Yes
Visit 2			Normal	Circulatory	04_023	2	Yes	17AUG16	17AUG2016	04	Entered	56	Male	17AUG16	202	MF4637	>=250 mg/day	No	No	>=250 mg/day	No	Yes	Yes	Yes	Yes
Visit 2			Normal	Neurologic	04_023	2	Yes	17AUG16	17AUG2016	04	Entered	56	Male	17AUG16	202	MF4637	>=250 mg/day	No	No	>=250 mg/day	No	Yes	Yes	Yes	Yes
Visit 2			Normal	Lymphatic	04_023	2	Yes	17AUG16	17AUG2016	04	Entered	56	Male	17AUG16	202	MF4637	>=250 mg/day	No	No	>=250 mg/day	No	Yes	Yes	Yes	Yes
Visit 2			Normal	Respiratory	04_023	2	Yes	17AUG16	17AUG2016	04	Entered	56	Male	17AUG16	202	MF4637	>=250 mg/day	No	No	>=250 mg/day	No	Yes	Yes	Yes	Yes
Visit 2			Not done	Other, specify	04_023	2	Yes	17AUG16	17AUG2016	04	Entered	56	Male	17AUG16	202	MF4637	>=250 mg/day	No	No	>=250 mg/day	No	Yes	Yes	Yes	Yes
Visit 2			Normal	General appearance	04_025	2	Yes	25AUG16	25AUG2016	04	Entered	49	Male	25AUG16	203	MF4637	<250 mg/day	No	No	<250 mg/day	No	Yes	Yes	Yes	Yes
Visit 2			Normal	Head, eyes, ears and nose	04_025	2	Yes	25AUG16	25AUG2016	04	Entered	49	Male	25AUG16	203	MF4637	<250 mg/day	No	No	<250 mg/day	No	Yes	Yes	Yes	Yes
Visit 2			Normal	Mouth, teeth and throat	04_025	2	Yes	25AUG16	25AUG2016	04	Entered	49	Male	25AUG16	203	MF4637	<250 mg/day	No	No	<250 mg/day	No	Yes	Yes	Yes	Yes
Visit 2			Normal	Neck and thyroid	04_025	2	Yes	25AUG16	25AUG2016	04	Entered	49	Male	25AUG16	203	MF4637	<250 mg/day	No	No	<250 mg/day	No	Yes	Yes	Yes	Yes
Visit 2			Normal	Chest	04_025	2	Yes	25AUG16	25AUG2016	04	Entered	49	Male	25AUG16	203	MF4637	<250 mg/day	No	No	<250 mg/day	No	Yes	Yes	Yes	Yes
Visit 2			Normal	Heart	04_025	2	Yes	25AUG16	25AUG2016	04	Entered	49	Male	25AUG16	203	MF4637	<250 mg/day	No	No	<250 mg/day	No	Yes	Yes	Yes	Yes
Visit 2			Normal	Abdomen	04_025	2	Yes	25AUG16	25AUG2016	04	Entered	49	Male	25AUG16	203	MF4637	<250 mg/day	No	No	<250 mg/day	No	Yes	Yes	Yes	Yes
Visit 2			Normal	Dermatologic	04_025	2	Yes	25AUG16	25AUG2016	04	Entered	49	Male	25AUG16	203	MF4637	<250 mg/day	No	No	<250 mg/day	No	Yes	Yes	Yes	Yes
Visit 2			Normal	Musculoskeletal	04_025	2	Yes	25AUG16	25AUG2016	04	Entered	49	Male	25AUG16	203	MF4637	<250 mg/day	No	No	<250 mg/day	No	Yes	Yes	Yes	Yes
Visit 2			Normal	Circulatory	04_025	2	Yes	25AUG16	25AUG2016	04	Entered	49	Male	25AUG16	203	MF4637	<250 mg/day	No	No	<250 mg/day	No	Yes	Yes	Yes	Yes
Visit 2			Normal	Neurologic	04_025	2	Yes	25AUG16	25AUG2016	04	Entered	49	Male	25AUG16	203	MF4637	<250 mg/day	No	No	<250 mg/day	No	Yes	Yes	Yes	Yes
Visit 2			Normal	Lymphatic	04_025	2	Yes	25AUG16	25AUG2016	04	Entered	49	Male	25AUG16	203	MF4637	<250 mg/day	No	No	<250 mg/day	No	Yes	Yes	Yes	Yes
Visit 2			Normal	Respiratory	04_025	2	Yes	25AUG16	25AUG2016	04	Entered	49	Male	25AUG16	203	MF4637	<250 mg/day	No	No	<250 mg/day	No	Yes	Yes	Yes	Yes
Visit 2			Not done	Other, specify	04_025	2	Yes	25AUG16	25AUG2016	04	Entered	49	Male	25AUG16	203	MF4637	<250 mg/day	No	No	<250 mg/day	No	Yes	Yes	Yes	Yes
Visit 2			Normal	General appearance	04_027	2	Yes	26AUG16	26AUG2016	04	Early Termination	39	Female		201	Placebo	>=250 mg/day	No	No	>=250 mg/day	No	No	Yes	No	No
Visit 2			Normal	Head, eyes, ears and nose	04_027	2	Yes	26AUG16	26AUG2016	04	Early Termination	39	Female		201	Placebo	>=250 mg/day	No	No	>=250 mg/day	No	No	Yes	No	No
Visit 2			Normal	Mouth, teeth and throat	04_027	2	Yes	26AUG16	26AUG2016	04	Early Termination	39	Female		201	Placebo	>=250 mg/day	No	No	>=250 mg/day	No	No	Yes	No	No
Visit 2			Normal	Neck and thyroid	04_027	2	Yes	26AUG16	26AUG2016	04	Early Termination	39	Female		201	Placebo	>=250 mg/day	No	No	>=250 mg/day	No	No	Yes	No	No
Visit 2			Normal	Chest	04_027	2	Yes	26AUG16	26AUG2016	04	Early Termination	39	Female		201	Placebo	>=250 mg/day	No	No	>=250 mg/day	No	No	Yes	No	No
Visit 2			Normal	Heart	04_027	2	Yes	26AUG16	26AUG2016	04	Early Termination	39	Female		201	Placebo	>=250 mg/day	No	No	>=250 mg/day	No	No	Yes	No	No
Visit 2			Normal	Abdomen	04_027	2	Yes	26AUG16	26AUG2016	04	Early Termination	39	Female		201	Placebo	>=250 mg/day	No	No	>=250 mg/day	No	No	Yes	No	No
Visit 2			Normal	Dermatologic	04_027	2	Yes	26AUG16	26AUG2016	04	Early Termination	39	Female		201	Placebo	>=250 mg/day	No	No	>=250 mg/day	No	No	Yes	No	No
Visit 2			Normal	Musculoskeletal	04_027	2	Yes	26AUG16	26AUG2016	04	Early Termination	39	Female		201	Placebo	>=250 mg/day	No	No	>=250 mg/day	No	No	Yes	No	No
Visit 2			Normal	Circulatory	04_027	2	Yes	26AUG16	26AUG2016	04	Early Termination	39	Female		201	Placebo	>=250 mg/day	No	No	>=250 mg/day	No	No	Yes	No	No
Visit 2			Normal	Neurologic	04_027	2	Yes	26AUG16	26AUG2016	04	Early Termination	39	Female		201	Placebo	>=250 mg/day	No	No	>=250 mg/day	No	No	Yes	No	No
Visit 2			Normal	Lymphatic	04_027	2	Yes	26AUG16	26AUG2016	04	Early Termination	39	Female		201	Placebo	>=250 mg/day	No	No	>=250 mg/day	No	No	Yes	No	No
Visit 2			Normal	Respiratory	04_027	2	Yes	26AUG16	26AUG2016	04	Early Termination	39	Female		201	Placebo	>=250 mg/day	No	No	>=250 mg/day	No	No	Yes	No	No
Visit 2			Not done	Other, specify	04_027	2	Yes	26AUG16	26AUG2016	04	Early Termination	39	Female		201	Placebo	>=250 mg/day	No	No	>=250 mg/day	No	No	Yes	No	No
Visit 2			Normal	General appearance	04_030	2	Yes	15SEP16	15SEP2016	04	Entered	67	Female	15SEP16	216	MF4637	>=250 mg/day	Yes	No	>=250 mg/day	No	Yes	Yes	Yes	Yes
Visit 2			Normal	Head, eyes, ears and nose	04_030	2	Yes	15SEP16	15SEP2016	04	Entered	67	Female	15SEP16	216	MF4637	>=250 mg/day	Yes	No	>=250 mg/day	No	Yes	Yes	Yes	Yes
Visit 2			Normal	Mouth, teeth and throat	04_030	2	Yes	15SEP16	15SEP2016	04	Entered	67	Female	15SEP16	216	MF4637	>=250 mg/day	Yes	No	>=250 mg/day	No	Yes	Yes	Yes	Yes
Visit 2			Normal	Neck and thyroid	04_030	2	Yes	15SEP16	15SEP2016	04	Entered	67	Female	15SEP16	216	MF4637	>=250 mg/day	Yes	No	>=250 mg/day	No	Yes	Yes	Yes	Yes
Visit 2			Normal	Chest	04_030	2	Yes	15SEP16	15SEP2016	04	Entered	67	Female	15SEP16	216	MF4637	>=250 mg/day	Yes	No	>=250 mg/day	No	Yes	Yes	Yes	Yes
Visit 2			Normal	Heart	04_030	2	Yes	15SEP16	15SEP2016	04	Entered	67	Female	15SEP16	216	MF4637	>=250 mg/day	Yes	No	>=250 mg/day	No	Yes	Yes	Yes	Yes
Visit 2			Normal	Abdomen	04_030	2	Yes	15SEP16	15SEP2016	04	Entered	67	Female	15SEP16	216	MF4637	>=250 mg/day	Yes	No	>=250 mg/day	No	Yes	Yes	Yes	Yes
Visit 2			Normal	Dermatologic	04_030	2	Yes	15SEP16	15SEP2016	04	Entered	67	Female	15SEP16	216	MF4637	>=250 mg/day	Yes	No	>=250 mg/day	No	Yes	Yes	Yes	Yes
Visit 2			Normal	Musculoskeletal	04_030	2	Yes	15SEP16	15SEP2016	04	Entered	67	Female	15SEP16	216	MF4637	>=250 mg/day	Yes	No	>=250 mg/day	No	Yes	Yes	Yes	Yes
Visit 2			Normal	Circulatory	04_030	2	Yes	15SEP16	15SEP2016	04	Entered	67	Female	15SEP16	216	MF4637	>=250 mg/day	Yes	No	>=250 mg/day	No	Yes	Yes	Yes	Yes
Visit 2			Normal	Neurologic	04_030	2	Yes	15SEP16	15SEP2016	04	Entered	67	Female	15SEP16	216	MF4637	>=250 mg/day	Yes	No	>=250 mg/day	No	Yes	Yes	Yes	Yes
Visit 2			Normal	Lymphatic	04_030	2	Yes	15SEP16	15SEP2016	04	Entered	67	Female	15SEP16	216	MF4637	>=250 mg/day	Yes	No	>=250 mg/day	No	Yes	Yes	Yes	Yes
Visit 2			Normal	Respiratory	04_030	2	Yes	15SEP16	15SEP2016	04	Entered	67	Female	15SEP16	216	MF4637	>=250 mg/day	Yes	No	>=250 mg/day	No	Yes	Yes	Yes	Yes
Visit 2			Not done	Other, specify	04_030	2	Yes	15SEP16	15SEP2016	04	Entered	67	Female	15SEP16	216	MF4637	>=250 mg/day	Yes	No	>=250 mg/day	No	Yes	Yes	Yes	Yes
Visit 2			Normal	General appearance	04_031	2	Yes	22SEP16	22SEP2016	04	Entered	56	Male	22SEP16	217	Placebo	<250 mg/day	Yes	No	<250 mg/day	No	Yes	Yes	Yes	Yes
Visit 2			Normal	Head, eyes, ears and nose	04_031	2	Yes	22SEP16	22SEP2016	04	Entered	56	Male	22SEP16	217	Placebo	<250 mg/day	Yes	No	<250 mg/day	No	Yes	Yes	Yes	Yes
Visit 2			Normal	Mouth, teeth and throat	04_031	2	Yes	22SEP16	22SEP2016	04	Entered	56	Male	22SEP16	217	Placebo	<250 mg/day	Yes	No	<250 mg/day	No	Yes	Yes	Yes	Yes
Visit 2			Normal	Neck and thyroid	04_031	2	Yes	22SEP16	22SEP2016	04	Entered	56	Male	22SEP16	217	Placebo	<250 mg/day	Yes	No	<250 mg/day	No	Yes	Yes	Yes	Yes
Visit 2			Normal	Chest	04_031	2	Yes	22SEP16	22SEP2016	04	Entered	56	Male	22SEP16	217	Placebo	<250 mg/day	Yes	No	<250 mg/day	No	Yes	Yes	Yes	Yes
Visit 2			Normal	Heart	04_031	2	Yes	22SEP16	22SEP2016	04	Entered	56	Male	22SEP16	217	Placebo	<250 mg/day	Yes	No	<250 mg/day	No	Yes	Yes	Yes	Yes
Visit 2			Normal	Abdomen	04_031	2	Yes	22SEP16	22SEP2016	04	Entered	56	Male	22SEP16	217	Placebo	<250 mg/day	Yes	No	<250 mg/day	No	Yes	Yes	Yes	Yes
Visit 2			Normal	Dermatologic	04_031	2	Yes	22SEP16	22SEP2016	04	Entered	56	Male	22SEP16	217	Placebo	<250 mg/day	Yes	No	<250 mg/day	No	Yes	Yes	Yes	Yes
Visit 2			Normal	Musculoskeletal	04_031	2	Yes	22SEP16	22SEP2016	04	Entered	56	Male	22SEP16	217	Placebo	<250 mg/day	Yes	No	<250 mg/day	No	Yes	Yes	Yes	Yes
Visit 2			Normal	Circulatory	04_031	2	Yes	22SEP16	22SEP2016	04	Entered	56	Male	22SEP16	217	Placebo	<250 mg/day	Yes	No	<250 mg/day	No	Yes	Yes	Yes	Yes
Visit 2			Normal	Neurologic	04_031	2	Yes	22SEP16	22SEP2016	04	Entered	56	Male	22SEP16	217	Placebo	<250 mg/day	Yes	No	<250 mg/day	No	Yes	Yes	Yes	Yes
Visit 2			Normal	Lymphatic	04_031	2	Yes	22SEP16	22SEP2016	04	Entered	56	Male	22SEP16	217	Placebo	<250 mg/day	Yes	No	<250 mg/day	No	Yes	Yes	Yes	Yes
Visit 2			Normal	Respiratory	04_031	2	Yes	22SEP16	22SEP2016	04	Entered	56	Male	22SEP16	217	Placebo	<250 mg/day	Yes	No	<250 mg/day	No	Yes	Yes	Yes	Yes
Visit 2			Not done	Other, specify	04_031	2	Yes	22SEP16	22SEP2016	04	Entered	56	Male	22SEP16	217	Placebo	<250 mg/day	Yes	No	<250 mg/day	No	Yes	Yes	Yes	Yes
Visit 2			Normal	General appearance	04_032	2	Yes	22SEP16	22SEP2016	04	Early Termination	53	Female	22SEP16	218	MF4637	<250 mg/day	No	No	<250 mg/day	No	Yes	Yes	No	No
Visit 2			Normal	Head, eyes, ears and nose	04_032	2	Yes	22SEP16	22SEP2016	04	Early Termination	53	Female	22SEP16	218	MF4637	<250 mg/day	No	No	<250 mg/day	No	Yes	Yes	No	No
Visit 2			Normal	Mouth, teeth and throat	04_032	2	Yes	22SEP16	22SEP2016	04	Early Termination	53	Female	22SEP16	218	MF4637	<250 mg/day	No	No	<250 mg/day	No	Yes	Yes	No	No
Visit 2			Normal	Neck and thyroid	04_032	2	Yes	22SEP16	22SEP2016	04	Early Termination	53	Female	22SEP16	218	MF4637	<250 mg/day	No	No	<250 mg/day	No	Yes	Yes	No	No
Visit 2			Normal	Chest	04_032	2	Yes	22SEP16	22SEP2016	04	Early Termination	53	Female	22SEP16	218	MF4637	<250 mg/day	No	No	<250 mg/day	No	Yes	Yes	No	No
Visit 2			Normal	Heart	04_032	2	Yes	22SEP16	22SEP2016	04	Early Termination	53	Female	22SEP16	218	MF4637	<250 mg/day	No	No	<250 mg/day	No	Yes	Yes	No	No
Visit 2			Normal	Abdomen	04_032	2	Yes	22SEP16	22SEP2016	04	Early Termination	53	Female	22SEP16	218	MF4637	<250 mg/day	No	No	<250 mg/day	No	Yes	Yes	No	No
Visit 2			Normal	Dermatologic	04_032	2	Yes	22SEP16	22SEP2016	04	Early Termination	53	Female	22SEP16	218	MF4637	<250 mg/day	No	No	<250 mg/day	No	Yes	Yes	No	No
Visit 2			Normal	Musculoskeletal	04_032	2	Yes	22SEP16	22SEP2016	04	Early Termination	53	Female	22SEP16	218	MF4637	<250 mg/day	No	No	<250 mg/day	No	Yes	Yes	No	No
Visit 2			Normal	Circulatory	04_032	2	Yes	22SEP16	22SEP2016	04	Early Termination	53	Female	22SEP16	218	MF4637	<250 mg/day	No	No	<250 mg/day	No	Yes	Yes	No	No
Visit 2			Normal	Neurologic	04_032	2	Yes	22SEP16	22SEP2016	04	Early Termination	53	Female	22SEP16	218	MF4637	<250 mg/day	No	No	<250 mg/day	No	Yes	Yes	No	No
Visit 2			Normal	Lymphatic	04_032	2	Yes	22SEP16	22SEP2016	04	Early Termination	53	Female	22SEP16	218	MF4637	<250 mg/day	No	No	<250 mg/day	No	Yes	Yes	No	No
Visit 2			Normal	Respiratory	04_032	2	Yes	22SEP16	22SEP2016	04	Early Termination	53	Female	22SEP16	218	MF4637	<250 mg/day	No	No	<250 mg/day	No	Yes	Yes	No	No
Visit 2			Not done	Other, specify	04_032	2	Yes	22SEP16	22SEP2016	04	Early Termination	53	Female	22SEP16	218	MF4637	<250 mg/day	No	No	<250 mg/day	No	Yes	Yes	No	No
Visit 2			Normal	General appearance	04_035	2	Yes	10OCT16	10OCT2016	04	Entered	59	Female	10OCT16	219	Placebo	>=250 mg/day	No	No	>=250 mg/day	No	Yes	Yes	Yes	Yes
Visit 2			Normal	Head, eyes, ears and nose	04_035	2	Yes	10OCT16	10OCT2016	04	Entered	59	Female	10OCT16	219	Placebo	>=250 mg/day	No	No	>=250 mg/day	No	Yes	Yes	Yes	Yes
Visit 2			Normal	Mouth, teeth and throat	04_035	2	Yes	10OCT16	10OCT2016	04	Entered	59	Female	10OCT16	219	Placebo	>=250 mg/day	No	No	>=250 mg/day	No	Yes	Yes	Yes	Yes
Visit 2			Normal	Neck and thyroid	04_035	2	Yes	10OCT16	10OCT2016	04	Entered	59	Female	10OCT16	219	Placebo	>=250 mg/day	No	No	>=250 mg/day	No	Yes	Yes	Yes	Yes
Visit 2			Normal	Chest	04_035	2	Yes	10OCT16	10OCT2016	04	Entered	59	Female	10OCT16	219	Placebo	>=250 mg/day	No	No	>=250 mg/day	No	Yes	Yes	Yes	Yes
Visit 2			Normal	Heart	04_035	2	Yes	10OCT16	10OCT2016	04	Entered	59	Female	10OCT16	219	Placebo	>=250 mg/day	No	No	>=250 mg/day	No	Yes	Yes	Yes	Yes
Visit 2			Normal	Abdomen	04_035	2	Yes	10OCT16	10OCT2016	04	Entered	59	Female	10OCT16	219	Placebo	>=250 mg/day	No	No	>=250 mg/day	No	Yes	Yes	Yes	Yes
Visit 2			Normal	Dermatologic	04_035	2	Yes	10OCT16	10OCT2016	04	Entered	59	Female	10OCT16	219	Placebo	>=250 mg/day	No	No	>=250 mg/day	No	Yes	Yes	Yes	Yes
Visit 2			Normal	Musculoskeletal	04_035	2	Yes	10OCT16	10OCT2016	04	Entered	59	Female	10OCT16	219	Placebo	>=250 mg/day	No	No	>=250 mg/day	No	Yes	Yes	Yes	Yes
Visit 2			Normal	Circulatory	04_035	2	Yes	10OCT16	10OCT2016	04	Entered	59	Female	10OCT16	219	Placebo	>=250 mg/day	No	No	>=250 mg/day	No	Yes	Yes	Yes	Yes
Visit 2			Normal	Neurologic	04_035	2	Yes	10OCT16	10OCT2016	04	Entered	59	Female	10OCT16	219	Placebo	>=250 mg/day	No	No	>=250 mg/day	No	Yes	Yes	Yes	Yes
Visit 2			Normal	Lymphatic	04_035	2	Yes	10OCT16	10OCT2016	04	Entered	59	Female	10OCT16	219	Placebo	>=250 mg/day	No	No	>=250 mg/day	No	Yes	Yes	Yes	Yes
Visit 2			Normal	Respiratory	04_035	2	Yes	10OCT16	10OCT2016	04	Entered	59	Female	10OCT16	219	Placebo	>=250 mg/day	No	No	>=250 mg/day	No	Yes	Yes	Yes	Yes
Visit 2			Not done	Other, specify	04_035	2	Yes	10OCT16	10OCT2016	04	Entered	59	Female	10OCT16	219	Placebo	>=250 mg/day	No	No	>=250 mg/day	No	Yes	Yes	Yes	Yes
Visit 2			Normal	General appearance	09_004	2	Yes	04FEB16	04FEB2016	09	Entered	48	Male	05FEB16	164	Placebo	>=250 mg/day	Yes	Yes	<250 mg/day	No	Yes	Yes	Yes	Yes
Visit 2			Normal	Head, eyes, ears and nose	09_004	2	Yes	04FEB16	04FEB2016	09	Entered	48	Male	05FEB16	164	Placebo	>=250 mg/day	Yes	Yes	<250 mg/day	No	Yes	Yes	Yes	Yes
Visit 2			Normal	Mouth, teeth and throat	09_004	2	Yes	04FEB16	04FEB2016	09	Entered	48	Male	05FEB16	164	Placebo	>=250 mg/day	Yes	Yes	<250 mg/day	No	Yes	Yes	Yes	Yes
Visit 2			Normal	Neck and thyroid	09_004	2	Yes	04FEB16	04FEB2016	09	Entered	48	Male	05FEB16	164	Placebo	>=250 mg/day	Yes	Yes	<250 mg/day	No	Yes	Yes	Yes	Yes
Visit 2			Normal	Chest	09_004	2	Yes	04FEB16	04FEB2016	09	Entered	48	Male	05FEB16	164	Placebo	>=250 mg/day	Yes	Yes	<250 mg/day	No	Yes	Yes	Yes	Yes
Visit 2			Normal	Heart	09_004	2	Yes	04FEB16	04FEB2016	09	Entered	48	Male	05FEB16	164	Placebo	>=250 mg/day	Yes	Yes	<250 mg/day	No	Yes	Yes	Yes	Yes
Visit 2			Normal	Abdomen	09_004	2	Yes	04FEB16	04FEB2016	09	Entered	48	Male	05FEB16	164	Placebo	>=250 mg/day	Yes	Yes	<250 mg/day	No	Yes	Yes	Yes	Yes
Visit 2			Normal	Dermatologic	09_004	2	Yes	04FEB16	04FEB2016	09	Entered	48	Male	05FEB16	164	Placebo	>=250 mg/day	Yes	Yes	<250 mg/day	No	Yes	Yes	Yes	Yes
Visit 2			Normal	Musculoskeletal	09_004	2	Yes	04FEB16	04FEB2016	09	Entered	48	Male	05FEB16	164	Placebo	>=250 mg/day	Yes	Yes	<250 mg/day	No	Yes	Yes	Yes	Yes
Visit 2			Normal	Circulatory	09_004	2	Yes	04FEB16	04FEB2016	09	Entered	48	Male	05FEB16	164	Placebo	>=250 mg/day	Yes	Yes	<250 mg/day	No	Yes	Yes	Yes	Yes
Visit 2			Normal	Neurologic	09_004	2	Yes	04FEB16	04FEB2016	09	Entered	48	Male	05FEB16	164	Placebo	>=250 mg/day	Yes	Yes	<250 mg/day	No	Yes	Yes	Yes	Yes
Visit 2			Normal	Lymphatic	09_004	2	Yes	04FEB16	04FEB2016	09	Entered	48	Male	05FEB16	164	Placebo	>=250 mg/day	Yes	Yes	<250 mg/day	No	Yes	Yes	Yes	Yes
Visit 2			Normal	Respiratory	09_004	2	Yes	04FEB16	04FEB2016	09	Entered	48	Male	05FEB16	164	Placebo	>=250 mg/day	Yes	Yes	<250 mg/day	No	Yes	Yes	Yes	Yes
Visit 2			Not done	Other, specify	09_004	2	Yes	04FEB16	04FEB2016	09	Entered	48	Male	05FEB16	164	Placebo	>=250 mg/day	Yes	Yes	<250 mg/day	No	Yes	Yes	Yes	Yes
Visit 2			Normal	General appearance	09_005	2	Yes	04FEB16	04FEB2016	09	Entered	53	Male	05FEB16	166	MF4637	>=250 mg/day	Yes	Yes	<250 mg/day	No	Yes	Yes	Yes	Yes
Visit 2			Normal	Head, eyes, ears and nose	09_005	2	Yes	04FEB16	04FEB2016	09	Entered	53	Male	05FEB16	166	MF4637	>=250 mg/day	Yes	Yes	<250 mg/day	No	Yes	Yes	Yes	Yes
Visit 2			Normal	Mouth, teeth and throat	09_005	2	Yes	04FEB16	04FEB2016	09	Entered	53	Male	05FEB16	166	MF4637	>=250 mg/day	Yes	Yes	<250 mg/day	No	Yes	Yes	Yes	Yes
Visit 2			Normal	Neck and thyroid	09_005	2	Yes	04FEB16	04FEB2016	09	Entered	53	Male	05FEB16	166	MF4637	>=250 mg/day	Yes	Yes	<250 mg/day	No	Yes	Yes	Yes	Yes
Visit 2			Normal	Chest	09_005	2	Yes	04FEB16	04FEB2016	09	Entered	53	Male	05FEB16	166	MF4637	>=250 mg/day	Yes	Yes	<250 mg/day	No	Yes	Yes	Yes	Yes
Visit 2			Normal	Heart	09_005	2	Yes	04FEB16	04FEB2016	09	Entered	53	Male	05FEB16	166	MF4637	>=250 mg/day	Yes	Yes	<250 mg/day	No	Yes	Yes	Yes	Yes
Visit 2			Normal	Abdomen	09_005	2	Yes	04FEB16	04FEB2016	09	Entered	53	Male	05FEB16	166	MF4637	>=250 mg/day	Yes	Yes	<250 mg/day	No	Yes	Yes	Yes	Yes
Visit 2			Normal	Dermatologic	09_005	2	Yes	04FEB16	04FEB2016	09	Entered	53	Male	05FEB16	166	MF4637	>=250 mg/day	Yes	Yes	<250 mg/day	No	Yes	Yes	Yes	Yes
Visit 2			Normal	Musculoskeletal	09_005	2	Yes	04FEB16	04FEB2016	09	Entered	53	Male	05FEB16	166	MF4637	>=250 mg/day	Yes	Yes	<250 mg/day	No	Yes	Yes	Yes	Yes
Visit 2			Normal	Circulatory	09_005	2	Yes	04FEB16	04FEB2016	09	Entered	53	Male	05FEB16	166	MF4637	>=250 mg/day	Yes	Yes	<250 mg/day	No	Yes	Yes	Yes	Yes
Visit 2			Normal	Neurologic	09_005	2	Yes	04FEB16	04FEB2016	09	Entered	53	Male	05FEB16	166	MF4637	>=250 mg/day	Yes	Yes	<250 mg/day	No	Yes	Yes	Yes	Yes
Visit 2			Normal	Lymphatic	09_005	2	Yes	04FEB16	04FEB2016	09	Entered	53	Male	05FEB16	166	MF4637	>=250 mg/day	Yes	Yes	<250 mg/day	No	Yes	Yes	Yes	Yes
Visit 2			Normal	Respiratory	09_005	2	Yes	04FEB16	04FEB2016	09	Entered	53	Male	05FEB16	166	MF4637	>=250 mg/day	Yes	Yes	<250 mg/day	No	Yes	Yes	Yes	Yes
Visit 2			Not done	Other, specify	09_005	2	Yes	04FEB16	04FEB2016	09	Entered	53	Male	05FEB16	166	MF4637	>=250 mg/day	Yes	Yes	<250 mg/day	No	Yes	Yes	Yes	Yes
Visit 2			Normal	General appearance	09_008	2	Yes	04MAR16	04MAR2016	09	Entered	49	Male	04MAR16	165	Placebo	<250 mg/day	No	No	<250 mg/day	No	Yes	Yes	Yes	Yes
Visit 2			Normal	Head, eyes, ears and nose	09_008	2	Yes	04MAR16	04MAR2016	09	Entered	49	Male	04MAR16	165	Placebo	<250 mg/day	No	No	<250 mg/day	No	Yes	Yes	Yes	Yes
Visit 2			Normal	Mouth, teeth and throat	09_008	2	Yes	04MAR16	04MAR2016	09	Entered	49	Male	04MAR16	165	Placebo	<250 mg/day	No	No	<250 mg/day	No	Yes	Yes	Yes	Yes
Visit 2			Normal	Neck and thyroid	09_008	2	Yes	04MAR16	04MAR2016	09	Entered	49	Male	04MAR16	165	Placebo	<250 mg/day	No	No	<250 mg/day	No	Yes	Yes	Yes	Yes
Visit 2			Normal	Chest	09_008	2	Yes	04MAR16	04MAR2016	09	Entered	49	Male	04MAR16	165	Placebo	<250 mg/day	No	No	<250 mg/day	No	Yes	Yes	Yes	Yes
Visit 2			Normal	Heart	09_008	2	Yes	04MAR16	04MAR2016	09	Entered	49	Male	04MAR16	165	Placebo	<250 mg/day	No	No	<250 mg/day	No	Yes	Yes	Yes	Yes
Visit 2			Normal	Abdomen	09_008	2	Yes	04MAR16	04MAR2016	09	Entered	49	Male	04MAR16	165	Placebo	<250 mg/day	No	No	<250 mg/day	No	Yes	Yes	Yes	Yes
Visit 2			Normal	Dermatologic	09_008	2	Yes	04MAR16	04MAR2016	09	Entered	49	Male	04MAR16	165	Placebo	<250 mg/day	No	No	<250 mg/day	No	Yes	Yes	Yes	Yes
Visit 2			Normal	Musculoskeletal	09_008	2	Yes	04MAR16	04MAR2016	09	Entered	49	Male	04MAR16	165	Placebo	<250 mg/day	No	No	<250 mg/day	No	Yes	Yes	Yes	Yes
Visit 2			Normal	Circulatory	09_008	2	Yes	04MAR16	04MAR2016	09	Entered	49	Male	04MAR16	165	Placebo	<250 mg/day	No	No	<250 mg/day	No	Yes	Yes	Yes	Yes
Visit 2			Normal	Neurologic	09_008	2	Yes	04MAR16	04MAR2016	09	Entered	49	Male	04MAR16	165	Placebo	<250 mg/day	No	No	<250 mg/day	No	Yes	Yes	Yes	Yes
Visit 2			Normal	Lymphatic	09_008	2	Yes	04MAR16	04MAR2016	09	Entered	49	Male	04MAR16	165	Placebo	<250 mg/day	No	No	<250 mg/day	No	Yes	Yes	Yes	Yes
Visit 2			Normal	Respiratory	09_008	2	Yes	04MAR16	04MAR2016	09	Entered	49	Male	04MAR16	165	Placebo	<250 mg/day	No	No	<250 mg/day	No	Yes	Yes	Yes	Yes
Visit 2			Not done	Other, specify	09_008	2	Yes	04MAR16	04MAR2016	09	Entered	49	Male	04MAR16	165	Placebo	<250 mg/day	No	No	<250 mg/day	No	Yes	Yes	Yes	Yes
Visit 2			Normal	General appearance	09_015	2	Yes	04OCT16	04OCT2016	09	Entered	72	Male	04OCT16	167	MF4637	>=250 mg/day	Yes	No	<250 mg/day	No	Yes	Yes	Yes	Yes
Visit 2			Normal	Head, eyes, ears and nose	09_015	2	Yes	04OCT16	04OCT2016	09	Entered	72	Male	04OCT16	167	MF4637	>=250 mg/day	Yes	No	<250 mg/day	No	Yes	Yes	Yes	Yes
Visit 2			Normal	Mouth, teeth and throat	09_015	2	Yes	04OCT16	04OCT2016	09	Entered	72	Male	04OCT16	167	MF4637	>=250 mg/day	Yes	No	<250 mg/day	No	Yes	Yes	Yes	Yes
Visit 2			Normal	Neck and thyroid	09_015	2	Yes	04OCT16	04OCT2016	09	Entered	72	Male	04OCT16	167	MF4637	>=250 mg/day	Yes	No	<250 mg/day	No	Yes	Yes	Yes	Yes
Visit 2			Normal	Chest	09_015	2	Yes	04OCT16	04OCT2016	09	Entered	72	Male	04OCT16	167	MF4637	>=250 mg/day	Yes	No	<250 mg/day	No	Yes	Yes	Yes	Yes
Visit 2			Normal	Heart	09_015	2	Yes	04OCT16	04OCT2016	09	Entered	72	Male	04OCT16	167	MF4637	>=250 mg/day	Yes	No	<250 mg/day	No	Yes	Yes	Yes	Yes
Visit 2			Normal	Abdomen	09_015	2	Yes	04OCT16	04OCT2016	09	Entered	72	Male	04OCT16	167	MF4637	>=250 mg/day	Yes	No	<250 mg/day	No	Yes	Yes	Yes	Yes
Visit 2			Normal	Dermatologic	09_015	2	Yes	04OCT16	04OCT2016	09	Entered	72	Male	04OCT16	167	MF4637	>=250 mg/day	Yes	No	<250 mg/day	No	Yes	Yes	Yes	Yes
Visit 2			Normal	Musculoskeletal	09_015	2	Yes	04OCT16	04OCT2016	09	Entered	72	Male	04OCT16	167	MF4637	>=250 mg/day	Yes	No	<250 mg/day	No	Yes	Yes	Yes	Yes
Visit 2			Normal	Circulatory	09_015	2	Yes	04OCT16	04OCT2016	09	Entered	72	Male	04OCT16	167	MF4637	>=250 mg/day	Yes	No	<250 mg/day	No	Yes	Yes	Yes	Yes
Visit 2			Normal	Neurologic	09_015	2	Yes	04OCT16	04OCT2016	09	Entered	72	Male	04OCT16	167	MF4637	>=250 mg/day	Yes	No	<250 mg/day	No	Yes	Yes	Yes	Yes
Visit 2			Normal	Lymphatic	09_015	2	Yes	04OCT16	04OCT2016	09	Entered	72	Male	04OCT16	167	MF4637	>=250 mg/day	Yes	No	<250 mg/day	No	Yes	Yes	Yes	Yes
Visit 2			Normal	Respiratory	09_015	2	Yes	04OCT16	04OCT2016	09	Entered	72	Male	04OCT16	167	MF4637	>=250 mg/day	Yes	No	<250 mg/day	No	Yes	Yes	Yes	Yes
Visit 2			Not done	Other, specify	09_015	2	Yes	04OCT16	04OCT2016	09	Entered	72	Male	04OCT16	167	MF4637	>=250 mg/day	Yes	No	<250 mg/day	No	Yes	Yes	Yes	Yes
Visit 2			Normal	General appearance	09_018	2	Yes	14NOV16	14NOV2016	09	Entered	73	Male	14NOV16	105	Placebo	>=250 mg/day	Yes	No	>=250 mg/day	No	Yes	Yes	Yes	Yes
Visit 2			Normal	Head, eyes, ears and nose	09_018	2	Yes	14NOV16	14NOV2016	09	Entered	73	Male	14NOV16	105	Placebo	>=250 mg/day	Yes	No	>=250 mg/day	No	Yes	Yes	Yes	Yes
Visit 2			Normal	Mouth, teeth and throat	09_018	2	Yes	14NOV16	14NOV2016	09	Entered	73	Male	14NOV16	105	Placebo	>=250 mg/day	Yes	No	>=250 mg/day	No	Yes	Yes	Yes	Yes
Visit 2			Normal	Neck and thyroid	09_018	2	Yes	14NOV16	14NOV2016	09	Entered	73	Male	14NOV16	105	Placebo	>=250 mg/day	Yes	No	>=250 mg/day	No	Yes	Yes	Yes	Yes
Visit 2			Normal	Chest	09_018	2	Yes	14NOV16	14NOV2016	09	Entered	73	Male	14NOV16	105	Placebo	>=250 mg/day	Yes	No	>=250 mg/day	No	Yes	Yes	Yes	Yes
Visit 2			Normal	Heart	09_018	2	Yes	14NOV16	14NOV2016	09	Entered	73	Male	14NOV16	105	Placebo	>=250 mg/day	Yes	No	>=250 mg/day	No	Yes	Yes	Yes	Yes
Visit 2			Normal	Abdomen	09_018	2	Yes	14NOV16	14NOV2016	09	Entered	73	Male	14NOV16	105	Placebo	>=250 mg/day	Yes	No	>=250 mg/day	No	Yes	Yes	Yes	Yes
Visit 2			Normal	Dermatologic	09_018	2	Yes	14NOV16	14NOV2016	09	Entered	73	Male	14NOV16	105	Placebo	>=250 mg/day	Yes	No	>=250 mg/day	No	Yes	Yes	Yes	Yes
Visit 2			Normal	Musculoskeletal	09_018	2	Yes	14NOV16	14NOV2016	09	Entered	73	Male	14NOV16	105	Placebo	>=250 mg/day	Yes	No	>=250 mg/day	No	Yes	Yes	Yes	Yes
Visit 2			Normal	Circulatory	09_018	2	Yes	14NOV16	14NOV2016	09	Entered	73	Male	14NOV16	105	Placebo	>=250 mg/day	Yes	No	>=250 mg/day	No	Yes	Yes	Yes	Yes
Visit 2			Normal	Neurologic	09_018	2	Yes	14NOV16	14NOV2016	09	Entered	73	Male	14NOV16	105	Placebo	>=250 mg/day	Yes	No	>=250 mg/day	No	Yes	Yes	Yes	Yes
Visit 2			Normal	Lymphatic	09_018	2	Yes	14NOV16	14NOV2016	09	Entered	73	Male	14NOV16	105	Placebo	>=250 mg/day	Yes	No	>=250 mg/day	No	Yes	Yes	Yes	Yes
Visit 2			Normal	Respiratory	09_018	2	Yes	14NOV16	14NOV2016	09	Entered	73	Male	14NOV16	105	Placebo	>=250 mg/day	Yes	No	>=250 mg/day	No	Yes	Yes	Yes	Yes
Visit 2			Not done	Other, specify	09_018	2	Yes	14NOV16	14NOV2016	09	Entered	73	Male	14NOV16	105	Placebo	>=250 mg/day	Yes	No	>=250 mg/day	No	Yes	Yes	Yes	Yes
Visit 2			Normal	General appearance	09_020	2	Yes	14OCT16	14OCT2016	09	Entered	53	Female	14OCT16	169	MF4637	>=250 mg/day	Yes	No	<250 mg/day	No	Yes	Yes	Yes	Yes
Visit 2			Normal	Head, eyes, ears and nose	09_020	2	Yes	14OCT16	14OCT2016	09	Entered	53	Female	14OCT16	169	MF4637	>=250 mg/day	Yes	No	<250 mg/day	No	Yes	Yes	Yes	Yes
Visit 2			Normal	Mouth, teeth and throat	09_020	2	Yes	14OCT16	14OCT2016	09	Entered	53	Female	14OCT16	169	MF4637	>=250 mg/day	Yes	No	<250 mg/day	No	Yes	Yes	Yes	Yes
Visit 2			Normal	Neck and thyroid	09_020	2	Yes	14OCT16	14OCT2016	09	Entered	53	Female	14OCT16	169	MF4637	>=250 mg/day	Yes	No	<250 mg/day	No	Yes	Yes	Yes	Yes
Visit 2			Normal	Chest	09_020	2	Yes	14OCT16	14OCT2016	09	Entered	53	Female	14OCT16	169	MF4637	>=250 mg/day	Yes	No	<250 mg/day	No	Yes	Yes	Yes	Yes
Visit 2			Normal	Heart	09_020	2	Yes	14OCT16	14OCT2016	09	Entered	53	Female	14OCT16	169	MF4637	>=250 mg/day	Yes	No	<250 mg/day	No	Yes	Yes	Yes	Yes
Visit 2			Normal	Abdomen	09_020	2	Yes	14OCT16	14OCT2016	09	Entered	53	Female	14OCT16	169	MF4637	>=250 mg/day	Yes	No	<250 mg/day	No	Yes	Yes	Yes	Yes
Visit 2			Normal	Dermatologic	09_020	2	Yes	14OCT16	14OCT2016	09	Entered	53	Female	14OCT16	169	MF4637	>=250 mg/day	Yes	No	<250 mg/day	No	Yes	Yes	Yes	Yes
Visit 2			Normal	Musculoskeletal	09_020	2	Yes	14OCT16	14OCT2016	09	Entered	53	Female	14OCT16	169	MF4637	>=250 mg/day	Yes	No	<250 mg/day	No	Yes	Yes	Yes	Yes
Visit 2			Normal	Circulatory	09_020	2	Yes	14OCT16	14OCT2016	09	Entered	53	Female	14OCT16	169	MF4637	>=250 mg/day	Yes	No	<250 mg/day	No	Yes	Yes	Yes	Yes
Visit 2			Normal	Neurologic	09_020	2	Yes	14OCT16	14OCT2016	09	Entered	53	Female	14OCT16	169	MF4637	>=250 mg/day	Yes	No	<250 mg/day	No	Yes	Yes	Yes	Yes
Visit 2			Normal	Lymphatic	09_020	2	Yes	14OCT16	14OCT2016	09	Entered	53	Female	14OCT16	169	MF4637	>=250 mg/day	Yes	No	<250 mg/day	No	Yes	Yes	Yes	Yes
Visit 2			Normal	Respiratory	09_020	2	Yes	14OCT16	14OCT2016	09	Entered	53	Female	14OCT16	169	MF4637	>=250 mg/day	Yes	No	<250 mg/day	No	Yes	Yes	Yes	Yes
Visit 2			Not done	Other, specify	09_020	2	Yes	14OCT16	14OCT2016	09	Entered	53	Female	14OCT16	169	MF4637	>=250 mg/day	Yes	No	<250 mg/day	No	Yes	Yes	Yes	Yes
Visit 2			Normal	General appearance	09_021	2	Yes	27OCT16	27OCT2016	09	Entered	54	Male	27OCT16	104	MF4637	>=250 mg/day	No	No	<250 mg/day	No	Yes	Yes	Yes	Yes
Visit 2			Normal	Head, eyes, ears and nose	09_021	2	Yes	27OCT16	27OCT2016	09	Entered	54	Male	27OCT16	104	MF4637	>=250 mg/day	No	No	<250 mg/day	No	Yes	Yes	Yes	Yes
Visit 2			Normal	Mouth, teeth and throat	09_021	2	Yes	27OCT16	27OCT2016	09	Entered	54	Male	27OCT16	104	MF4637	>=250 mg/day	No	No	<250 mg/day	No	Yes	Yes	Yes	Yes
Visit 2			Normal	Neck and thyroid	09_021	2	Yes	27OCT16	27OCT2016	09	Entered	54	Male	27OCT16	104	MF4637	>=250 mg/day	No	No	<250 mg/day	No	Yes	Yes	Yes	Yes
Visit 2			Normal	Chest	09_021	2	Yes	27OCT16	27OCT2016	09	Entered	54	Male	27OCT16	104	MF4637	>=250 mg/day	No	No	<250 mg/day	No	Yes	Yes	Yes	Yes
Visit 2			Normal	Heart	09_021	2	Yes	27OCT16	27OCT2016	09	Entered	54	Male	27OCT16	104	MF4637	>=250 mg/day	No	No	<250 mg/day	No	Yes	Yes	Yes	Yes
Visit 2			Normal	Abdomen	09_021	2	Yes	27OCT16	27OCT2016	09	Entered	54	Male	27OCT16	104	MF4637	>=250 mg/day	No	No	<250 mg/day	No	Yes	Yes	Yes	Yes
Visit 2			Normal	Dermatologic	09_021	2	Yes	27OCT16	27OCT2016	09	Entered	54	Male	27OCT16	104	MF4637	>=250 mg/day	No	No	<250 mg/day	No	Yes	Yes	Yes	Yes
Visit 2			Normal	Musculoskeletal	09_021	2	Yes	27OCT16	27OCT2016	09	Entered	54	Male	27OCT16	104	MF4637	>=250 mg/day	No	No	<250 mg/day	No	Yes	Yes	Yes	Yes
Visit 2			Normal	Circulatory	09_021	2	Yes	27OCT16	27OCT2016	09	Entered	54	Male	27OCT16	104	MF4637	>=250 mg/day	No	No	<250 mg/day	No	Yes	Yes	Yes	Yes
Visit 2			Normal	Neurologic	09_021	2	Yes	27OCT16	27OCT2016	09	Entered	54	Male	27OCT16	104	MF4637	>=250 mg/day	No	No	<250 mg/day	No	Yes	Yes	Yes	Yes
Visit 2			Normal	Lymphatic	09_021	2	Yes	27OCT16	27OCT2016	09	Entered	54	Male	27OCT16	104	MF4637	>=250 mg/day	No	No	<250 mg/day	No	Yes	Yes	Yes	Yes
Visit 2			Normal	Respiratory	09_021	2	Yes	27OCT16	27OCT2016	09	Entered	54	Male	27OCT16	104	MF4637	>=250 mg/day	No	No	<250 mg/day	No	Yes	Yes	Yes	Yes
Visit 2			Not done	Other, specify	09_021	2	Yes	27OCT16	27OCT2016	09	Entered	54	Male	27OCT16	104	MF4637	>=250 mg/day	No	No	<250 mg/day	No	Yes	Yes	Yes	Yes
Visit 2			Normal	General appearance	09_024	2	Yes	04OCT16	04OCT2016	09	Entered	47	Male	04OCT16	168	Placebo	>=250 mg/day	Yes	No	<250 mg/day	No	Yes	Yes	Yes	No
Visit 2			Normal	Head, eyes, ears and nose	09_024	2	Yes	04OCT16	04OCT2016	09	Entered	47	Male	04OCT16	168	Placebo	>=250 mg/day	Yes	No	<250 mg/day	No	Yes	Yes	Yes	No
Visit 2			Normal	Mouth, teeth and throat	09_024	2	Yes	04OCT16	04OCT2016	09	Entered	47	Male	04OCT16	168	Placebo	>=250 mg/day	Yes	No	<250 mg/day	No	Yes	Yes	Yes	No
Visit 2			Normal	Neck and thyroid	09_024	2	Yes	04OCT16	04OCT2016	09	Entered	47	Male	04OCT16	168	Placebo	>=250 mg/day	Yes	No	<250 mg/day	No	Yes	Yes	Yes	No
Visit 2			Normal	Chest	09_024	2	Yes	04OCT16	04OCT2016	09	Entered	47	Male	04OCT16	168	Placebo	>=250 mg/day	Yes	No	<250 mg/day	No	Yes	Yes	Yes	No
Visit 2			Normal	Heart	09_024	2	Yes	04OCT16	04OCT2016	09	Entered	47	Male	04OCT16	168	Placebo	>=250 mg/day	Yes	No	<250 mg/day	No	Yes	Yes	Yes	No
Visit 2			Normal	Abdomen	09_024	2	Yes	04OCT16	04OCT2016	09	Entered	47	Male	04OCT16	168	Placebo	>=250 mg/day	Yes	No	<250 mg/day	No	Yes	Yes	Yes	No
Visit 2			Normal	Dermatologic	09_024	2	Yes	04OCT16	04OCT2016	09	Entered	47	Male	04OCT16	168	Placebo	>=250 mg/day	Yes	No	<250 mg/day	No	Yes	Yes	Yes	No
Visit 2			Normal	Musculoskeletal	09_024	2	Yes	04OCT16	04OCT2016	09	Entered	47	Male	04OCT16	168	Placebo	>=250 mg/day	Yes	No	<250 mg/day	No	Yes	Yes	Yes	No
Visit 2			Normal	Circulatory	09_024	2	Yes	04OCT16	04OCT2016	09	Entered	47	Male	04OCT16	168	Placebo	>=250 mg/day	Yes	No	<250 mg/day	No	Yes	Yes	Yes	No
Visit 2			Normal	Neurologic	09_024	2	Yes	04OCT16	04OCT2016	09	Entered	47	Male	04OCT16	168	Placebo	>=250 mg/day	Yes	No	<250 mg/day	No	Yes	Yes	Yes	No
Visit 2			Normal	Lymphatic	09_024	2	Yes	04OCT16	04OCT2016	09	Entered	47	Male	04OCT16	168	Placebo	>=250 mg/day	Yes	No	<250 mg/day	No	Yes	Yes	Yes	No
Visit 2			Normal	Respiratory	09_024	2	Yes	04OCT16	04OCT2016	09	Entered	47	Male	04OCT16	168	Placebo	>=250 mg/day	Yes	No	<250 mg/day	No	Yes	Yes	Yes	No
Visit 2			Not done	Other, specify	09_024	2	Yes	04OCT16	04OCT2016	09	Entered	47	Male	04OCT16	168	Placebo	>=250 mg/day	Yes	No	<250 mg/day	No	Yes	Yes	Yes	No
Visit 2			Normal	General appearance	09_026	2	Yes	12DEC16	12DEC2016	09	Entered	55	Female	12DEC16	171	Placebo	>=250 mg/day	No	No	<250 mg/day	No	Yes	Yes	Yes	Yes
Visit 2			Normal	Head, eyes, ears and nose	09_026	2	Yes	12DEC16	12DEC2016	09	Entered	55	Female	12DEC16	171	Placebo	>=250 mg/day	No	No	<250 mg/day	No	Yes	Yes	Yes	Yes
Visit 2			Normal	Mouth, teeth and throat	09_026	2	Yes	12DEC16	12DEC2016	09	Entered	55	Female	12DEC16	171	Placebo	>=250 mg/day	No	No	<250 mg/day	No	Yes	Yes	Yes	Yes
Visit 2			Normal	Neck and thyroid	09_026	2	Yes	12DEC16	12DEC2016	09	Entered	55	Female	12DEC16	171	Placebo	>=250 mg/day	No	No	<250 mg/day	No	Yes	Yes	Yes	Yes
Visit 2			Normal	Chest	09_026	2	Yes	12DEC16	12DEC2016	09	Entered	55	Female	12DEC16	171	Placebo	>=250 mg/day	No	No	<250 mg/day	No	Yes	Yes	Yes	Yes
Visit 2			Normal	Heart	09_026	2	Yes	12DEC16	12DEC2016	09	Entered	55	Female	12DEC16	171	Placebo	>=250 mg/day	No	No	<250 mg/day	No	Yes	Yes	Yes	Yes
Visit 2			Normal	Abdomen	09_026	2	Yes	12DEC16	12DEC2016	09	Entered	55	Female	12DEC16	171	Placebo	>=250 mg/day	No	No	<250 mg/day	No	Yes	Yes	Yes	Yes
Visit 2			Normal	Dermatologic	09_026	2	Yes	12DEC16	12DEC2016	09	Entered	55	Female	12DEC16	171	Placebo	>=250 mg/day	No	No	<250 mg/day	No	Yes	Yes	Yes	Yes
Visit 2			Normal	Musculoskeletal	09_026	2	Yes	12DEC16	12DEC2016	09	Entered	55	Female	12DEC16	171	Placebo	>=250 mg/day	No	No	<250 mg/day	No	Yes	Yes	Yes	Yes
Visit 2			Normal	Circulatory	09_026	2	Yes	12DEC16	12DEC2016	09	Entered	55	Female	12DEC16	171	Placebo	>=250 mg/day	No	No	<250 mg/day	No	Yes	Yes	Yes	Yes
Visit 2			Normal	Neurologic	09_026	2	Yes	12DEC16	12DEC2016	09	Entered	55	Female	12DEC16	171	Placebo	>=250 mg/day	No	No	<250 mg/day	No	Yes	Yes	Yes	Yes
Visit 2			Normal	Lymphatic	09_026	2	Yes	12DEC16	12DEC2016	09	Entered	55	Female	12DEC16	171	Placebo	>=250 mg/day	No	No	<250 mg/day	No	Yes	Yes	Yes	Yes
Visit 2			Normal	Respiratory	09_026	2	Yes	12DEC16	12DEC2016	09	Entered	55	Female	12DEC16	171	Placebo	>=250 mg/day	No	No	<250 mg/day	No	Yes	Yes	Yes	Yes
Visit 2			Not done	Other, specify	09_026	2	Yes	12DEC16	12DEC2016	09	Entered	55	Female	12DEC16	171	Placebo	>=250 mg/day	No	No	<250 mg/day	No	Yes	Yes	Yes	Yes
Visit 2			Normal	General appearance	09_027	2	Yes	12DEC16	12DEC2016	09	Early Termination	60	Female	12DEC16	107	Placebo	>=250 mg/day	Yes	No	<250 mg/day	No	Yes	Yes	No	No
Visit 2			Normal	Head, eyes, ears and nose	09_027	2	Yes	12DEC16	12DEC2016	09	Early Termination	60	Female	12DEC16	107	Placebo	>=250 mg/day	Yes	No	<250 mg/day	No	Yes	Yes	No	No
Visit 2			Normal	Mouth, teeth and throat	09_027	2	Yes	12DEC16	12DEC2016	09	Early Termination	60	Female	12DEC16	107	Placebo	>=250 mg/day	Yes	No	<250 mg/day	No	Yes	Yes	No	No
Visit 2			Normal	Neck and thyroid	09_027	2	Yes	12DEC16	12DEC2016	09	Early Termination	60	Female	12DEC16	107	Placebo	>=250 mg/day	Yes	No	<250 mg/day	No	Yes	Yes	No	No
Visit 2			Normal	Chest	09_027	2	Yes	12DEC16	12DEC2016	09	Early Termination	60	Female	12DEC16	107	Placebo	>=250 mg/day	Yes	No	<250 mg/day	No	Yes	Yes	No	No
Visit 2			Normal	Heart	09_027	2	Yes	12DEC16	12DEC2016	09	Early Termination	60	Female	12DEC16	107	Placebo	>=250 mg/day	Yes	No	<250 mg/day	No	Yes	Yes	No	No
Visit 2			Normal	Abdomen	09_027	2	Yes	12DEC16	12DEC2016	09	Early Termination	60	Female	12DEC16	107	Placebo	>=250 mg/day	Yes	No	<250 mg/day	No	Yes	Yes	No	No
Visit 2			Normal	Dermatologic	09_027	2	Yes	12DEC16	12DEC2016	09	Early Termination	60	Female	12DEC16	107	Placebo	>=250 mg/day	Yes	No	<250 mg/day	No	Yes	Yes	No	No
Visit 2			Normal	Musculoskeletal	09_027	2	Yes	12DEC16	12DEC2016	09	Early Termination	60	Female	12DEC16	107	Placebo	>=250 mg/day	Yes	No	<250 mg/day	No	Yes	Yes	No	No
Visit 2			Normal	Circulatory	09_027	2	Yes	12DEC16	12DEC2016	09	Early Termination	60	Female	12DEC16	107	Placebo	>=250 mg/day	Yes	No	<250 mg/day	No	Yes	Yes	No	No
Visit 2			Normal	Neurologic	09_027	2	Yes	12DEC16	12DEC2016	09	Early Termination	60	Female	12DEC16	107	Placebo	>=250 mg/day	Yes	No	<250 mg/day	No	Yes	Yes	No	No
Visit 2			Normal	Lymphatic	09_027	2	Yes	12DEC16	12DEC2016	09	Early Termination	60	Female	12DEC16	107	Placebo	>=250 mg/day	Yes	No	<250 mg/day	No	Yes	Yes	No	No
Visit 2			Normal	Respiratory	09_027	2	Yes	12DEC16	12DEC2016	09	Early Termination	60	Female	12DEC16	107	Placebo	>=250 mg/day	Yes	No	<250 mg/day	No	Yes	Yes	No	No
Visit 2			Not done	Other, specify	09_027	2	Yes	12DEC16	12DEC2016	09	Early Termination	60	Female	12DEC16	107	Placebo	>=250 mg/day	Yes	No	<250 mg/day	No	Yes	Yes	No	No
Visit 2			Normal	General appearance	09_029	2	Yes	12DEC16	12DEC2016	09	Early Termination	63	Female	12DEC16	106	MF4637	>=250 mg/day	Yes	No	<250 mg/day	No	Yes	Yes	No	No
Visit 2			Normal	Head, eyes, ears and nose	09_029	2	Yes	12DEC16	12DEC2016	09	Early Termination	63	Female	12DEC16	106	MF4637	>=250 mg/day	Yes	No	<250 mg/day	No	Yes	Yes	No	No
Visit 2			Normal	Mouth, teeth and throat	09_029	2	Yes	12DEC16	12DEC2016	09	Early Termination	63	Female	12DEC16	106	MF4637	>=250 mg/day	Yes	No	<250 mg/day	No	Yes	Yes	No	No
Visit 2			Normal	Neck and thyroid	09_029	2	Yes	12DEC16	12DEC2016	09	Early Termination	63	Female	12DEC16	106	MF4637	>=250 mg/day	Yes	No	<250 mg/day	No	Yes	Yes	No	No
Visit 2			Normal	Chest	09_029	2	Yes	12DEC16	12DEC2016	09	Early Termination	63	Female	12DEC16	106	MF4637	>=250 mg/day	Yes	No	<250 mg/day	No	Yes	Yes	No	No
Visit 2			Normal	Heart	09_029	2	Yes	12DEC16	12DEC2016	09	Early Termination	63	Female	12DEC16	106	MF4637	>=250 mg/day	Yes	No	<250 mg/day	No	Yes	Yes	No	No
Visit 2			Normal	Abdomen	09_029	2	Yes	12DEC16	12DEC2016	09	Early Termination	63	Female	12DEC16	106	MF4637	>=250 mg/day	Yes	No	<250 mg/day	No	Yes	Yes	No	No
Visit 2			Normal	Dermatologic	09_029	2	Yes	12DEC16	12DEC2016	09	Early Termination	63	Female	12DEC16	106	MF4637	>=250 mg/day	Yes	No	<250 mg/day	No	Yes	Yes	No	No
Visit 2			Normal	Musculoskeletal	09_029	2	Yes	12DEC16	12DEC2016	09	Early Termination	63	Female	12DEC16	106	MF4637	>=250 mg/day	Yes	No	<250 mg/day	No	Yes	Yes	No	No
Visit 2			Normal	Circulatory	09_029	2	Yes	12DEC16	12DEC2016	09	Early Termination	63	Female	12DEC16	106	MF4637	>=250 mg/day	Yes	No	<250 mg/day	No	Yes	Yes	No	No
Visit 2			Normal	Neurologic	09_029	2	Yes	12DEC16	12DEC2016	09	Early Termination	63	Female	12DEC16	106	MF4637	>=250 mg/day	Yes	No	<250 mg/day	No	Yes	Yes	No	No
Visit 2			Normal	Lymphatic	09_029	2	Yes	12DEC16	12DEC2016	09	Early Termination	63	Female	12DEC16	106	MF4637	>=250 mg/day	Yes	No	<250 mg/day	No	Yes	Yes	No	No
Visit 2			Normal	Respiratory	09_029	2	Yes	12DEC16	12DEC2016	09	Early Termination	63	Female	12DEC16	106	MF4637	>=250 mg/day	Yes	No	<250 mg/day	No	Yes	Yes	No	No
Visit 2			Not done	Other, specify	09_029	2	Yes	12DEC16	12DEC2016	09	Early Termination	63	Female	12DEC16	106	MF4637	>=250 mg/day	Yes	No	<250 mg/day	No	Yes	Yes	No	No
Visit 2			Normal	General appearance	09_030	2	Yes	12DEC16	12DEC2016	09	Entered	59	Female	12DEC16	170	MF4637	>=250 mg/day	No	No	<250 mg/day	No	Yes	Yes	Yes	Yes
Visit 2			Normal	Head, eyes, ears and nose	09_030	2	Yes	12DEC16	12DEC2016	09	Entered	59	Female	12DEC16	170	MF4637	>=250 mg/day	No	No	<250 mg/day	No	Yes	Yes	Yes	Yes
Visit 2			Normal	Mouth, teeth and throat	09_030	2	Yes	12DEC16	12DEC2016	09	Entered	59	Female	12DEC16	170	MF4637	>=250 mg/day	No	No	<250 mg/day	No	Yes	Yes	Yes	Yes
Visit 2			Normal	Neck and thyroid	09_030	2	Yes	12DEC16	12DEC2016	09	Entered	59	Female	12DEC16	170	MF4637	>=250 mg/day	No	No	<250 mg/day	No	Yes	Yes	Yes	Yes
Visit 2			Normal	Chest	09_030	2	Yes	12DEC16	12DEC2016	09	Entered	59	Female	12DEC16	170	MF4637	>=250 mg/day	No	No	<250 mg/day	No	Yes	Yes	Yes	Yes
Visit 2			Normal	Heart	09_030	2	Yes	12DEC16	12DEC2016	09	Entered	59	Female	12DEC16	170	MF4637	>=250 mg/day	No	No	<250 mg/day	No	Yes	Yes	Yes	Yes
Visit 2			Normal	Abdomen	09_030	2	Yes	12DEC16	12DEC2016	09	Entered	59	Female	12DEC16	170	MF4637	>=250 mg/day	No	No	<250 mg/day	No	Yes	Yes	Yes	Yes
Visit 2			Normal	Dermatologic	09_030	2	Yes	12DEC16	12DEC2016	09	Entered	59	Female	12DEC16	170	MF4637	>=250 mg/day	No	No	<250 mg/day	No	Yes	Yes	Yes	Yes
Visit 2			Normal	Musculoskeletal	09_030	2	Yes	12DEC16	12DEC2016	09	Entered	59	Female	12DEC16	170	MF4637	>=250 mg/day	No	No	<250 mg/day	No	Yes	Yes	Yes	Yes
Visit 2			Normal	Circulatory	09_030	2	Yes	12DEC16	12DEC2016	09	Entered	59	Female	12DEC16	170	MF4637	>=250 mg/day	No	No	<250 mg/day	No	Yes	Yes	Yes	Yes
Visit 2			Normal	Neurologic	09_030	2	Yes	12DEC16	12DEC2016	09	Entered	59	Female	12DEC16	170	MF4637	>=250 mg/day	No	No	<250 mg/day	No	Yes	Yes	Yes	Yes
Visit 2			Normal	Lymphatic	09_030	2	Yes	12DEC16	12DEC2016	09	Entered	59	Female	12DEC16	170	MF4637	>=250 mg/day	No	No	<250 mg/day	No	Yes	Yes	Yes	Yes
Visit 2			Normal	Respiratory	09_030	2	Yes	12DEC16	12DEC2016	09	Entered	59	Female	12DEC16	170	MF4637	>=250 mg/day	No	No	<250 mg/day	No	Yes	Yes	Yes	Yes
Visit 2			Not done	Other, specify	09_030	2	Yes	12DEC16	12DEC2016	09	Entered	59	Female	12DEC16	170	MF4637	>=250 mg/day	No	No	<250 mg/day	No	Yes	Yes	Yes	Yes
Visit 2			Normal	General appearance	10_004	2	Yes	01FEB16	01FEB2016	10	Entered	47	Male	01FEB16	172	MF4637	>=250 mg/day	No	No	>=250 mg/day	No	Yes	Yes	Yes	Yes
Visit 2			Normal	Head, eyes, ears and nose	10_004	2	Yes	01FEB16	01FEB2016	10	Entered	47	Male	01FEB16	172	MF4637	>=250 mg/day	No	No	>=250 mg/day	No	Yes	Yes	Yes	Yes
Visit 2			Normal	Mouth, teeth and throat	10_004	2	Yes	01FEB16	01FEB2016	10	Entered	47	Male	01FEB16	172	MF4637	>=250 mg/day	No	No	>=250 mg/day	No	Yes	Yes	Yes	Yes
Visit 2			Normal	Neck and thyroid	10_004	2	Yes	01FEB16	01FEB2016	10	Entered	47	Male	01FEB16	172	MF4637	>=250 mg/day	No	No	>=250 mg/day	No	Yes	Yes	Yes	Yes
Visit 2			Normal	Chest	10_004	2	Yes	01FEB16	01FEB2016	10	Entered	47	Male	01FEB16	172	MF4637	>=250 mg/day	No	No	>=250 mg/day	No	Yes	Yes	Yes	Yes
Visit 2			Normal	Heart	10_004	2	Yes	01FEB16	01FEB2016	10	Entered	47	Male	01FEB16	172	MF4637	>=250 mg/day	No	No	>=250 mg/day	No	Yes	Yes	Yes	Yes
Visit 2			Normal	Abdomen	10_004	2	Yes	01FEB16	01FEB2016	10	Entered	47	Male	01FEB16	172	MF4637	>=250 mg/day	No	No	>=250 mg/day	No	Yes	Yes	Yes	Yes
Visit 2			Normal	Dermatologic	10_004	2	Yes	01FEB16	01FEB2016	10	Entered	47	Male	01FEB16	172	MF4637	>=250 mg/day	No	No	>=250 mg/day	No	Yes	Yes	Yes	Yes
Visit 2			Normal	Musculoskeletal	10_004	2	Yes	01FEB16	01FEB2016	10	Entered	47	Male	01FEB16	172	MF4637	>=250 mg/day	No	No	>=250 mg/day	No	Yes	Yes	Yes	Yes
Visit 2			Normal	Circulatory	10_004	2	Yes	01FEB16	01FEB2016	10	Entered	47	Male	01FEB16	172	MF4637	>=250 mg/day	No	No	>=250 mg/day	No	Yes	Yes	Yes	Yes
Visit 2			Normal	Neurologic	10_004	2	Yes	01FEB16	01FEB2016	10	Entered	47	Male	01FEB16	172	MF4637	>=250 mg/day	No	No	>=250 mg/day	No	Yes	Yes	Yes	Yes
Visit 2			Normal	Lymphatic	10_004	2	Yes	01FEB16	01FEB2016	10	Entered	47	Male	01FEB16	172	MF4637	>=250 mg/day	No	No	>=250 mg/day	No	Yes	Yes	Yes	Yes
Visit 2			Normal	Respiratory	10_004	2	Yes	01FEB16	01FEB2016	10	Entered	47	Male	01FEB16	172	MF4637	>=250 mg/day	No	No	>=250 mg/day	No	Yes	Yes	Yes	Yes
Visit 2			Not done	Other, specify	10_004	2	Yes	01FEB16	01FEB2016	10	Entered	47	Male	01FEB16	172	MF4637	>=250 mg/day	No	No	>=250 mg/day	No	Yes	Yes	Yes	Yes
Visit 2			Normal	General appearance	10_006	2	Yes	25FEB16	25FEB2016	10	Entered	55	Male	25FEB16	174	Placebo	<250 mg/day	No	No	<250 mg/day	No	Yes	Yes	Yes	Yes
Visit 2			Normal	Head, eyes, ears and nose	10_006	2	Yes	25FEB16	25FEB2016	10	Entered	55	Male	25FEB16	174	Placebo	<250 mg/day	No	No	<250 mg/day	No	Yes	Yes	Yes	Yes
Visit 2			Normal	Mouth, teeth and throat	10_006	2	Yes	25FEB16	25FEB2016	10	Entered	55	Male	25FEB16	174	Placebo	<250 mg/day	No	No	<250 mg/day	No	Yes	Yes	Yes	Yes
Visit 2			Normal	Neck and thyroid	10_006	2	Yes	25FEB16	25FEB2016	10	Entered	55	Male	25FEB16	174	Placebo	<250 mg/day	No	No	<250 mg/day	No	Yes	Yes	Yes	Yes
Visit 2			Normal	Chest	10_006	2	Yes	25FEB16	25FEB2016	10	Entered	55	Male	25FEB16	174	Placebo	<250 mg/day	No	No	<250 mg/day	No	Yes	Yes	Yes	Yes
Visit 2			Normal	Heart	10_006	2	Yes	25FEB16	25FEB2016	10	Entered	55	Male	25FEB16	174	Placebo	<250 mg/day	No	No	<250 mg/day	No	Yes	Yes	Yes	Yes
Visit 2			Normal	Abdomen	10_006	2	Yes	25FEB16	25FEB2016	10	Entered	55	Male	25FEB16	174	Placebo	<250 mg/day	No	No	<250 mg/day	No	Yes	Yes	Yes	Yes
Visit 2			Normal	Dermatologic	10_006	2	Yes	25FEB16	25FEB2016	10	Entered	55	Male	25FEB16	174	Placebo	<250 mg/day	No	No	<250 mg/day	No	Yes	Yes	Yes	Yes
Visit 2			Normal	Musculoskeletal	10_006	2	Yes	25FEB16	25FEB2016	10	Entered	55	Male	25FEB16	174	Placebo	<250 mg/day	No	No	<250 mg/day	No	Yes	Yes	Yes	Yes
Visit 2			Normal	Circulatory	10_006	2	Yes	25FEB16	25FEB2016	10	Entered	55	Male	25FEB16	174	Placebo	<250 mg/day	No	No	<250 mg/day	No	Yes	Yes	Yes	Yes
Visit 2			Normal	Neurologic	10_006	2	Yes	25FEB16	25FEB2016	10	Entered	55	Male	25FEB16	174	Placebo	<250 mg/day	No	No	<250 mg/day	No	Yes	Yes	Yes	Yes
Visit 2			Normal	Lymphatic	10_006	2	Yes	25FEB16	25FEB2016	10	Entered	55	Male	25FEB16	174	Placebo	<250 mg/day	No	No	<250 mg/day	No	Yes	Yes	Yes	Yes
Visit 2			Normal	Respiratory	10_006	2	Yes	25FEB16	25FEB2016	10	Entered	55	Male	25FEB16	174	Placebo	<250 mg/day	No	No	<250 mg/day	No	Yes	Yes	Yes	Yes
Visit 2			Not done	Other, specify	10_006	2	Yes	25FEB16	25FEB2016	10	Entered	55	Male	25FEB16	174	Placebo	<250 mg/day	No	No	<250 mg/day	No	Yes	Yes	Yes	Yes
Visit 2			Normal	General appearance	10_007	2	Yes	01MAR16	01MAR2016	10	Entered	54	Female	01MAR16	173	MF4637	<250 mg/day	No	Yes	<250 mg/day	No	Yes	Yes	Yes	Yes
Visit 2			Normal	Head, eyes, ears and nose	10_007	2	Yes	01MAR16	01MAR2016	10	Entered	54	Female	01MAR16	173	MF4637	<250 mg/day	No	Yes	<250 mg/day	No	Yes	Yes	Yes	Yes
Visit 2		Poor dentition	Abnormal	Mouth, teeth and throat	10_007	2	Yes	01MAR16	01MAR2016	10	Entered	54	Female	01MAR16	173	MF4637	<250 mg/day	No	Yes	<250 mg/day	No	Yes	Yes	Yes	Yes
Visit 2			Normal	Neck and thyroid	10_007	2	Yes	01MAR16	01MAR2016	10	Entered	54	Female	01MAR16	173	MF4637	<250 mg/day	No	Yes	<250 mg/day	No	Yes	Yes	Yes	Yes
Visit 2			Normal	Chest	10_007	2	Yes	01MAR16	01MAR2016	10	Entered	54	Female	01MAR16	173	MF4637	<250 mg/day	No	Yes	<250 mg/day	No	Yes	Yes	Yes	Yes
Visit 2			Normal	Heart	10_007	2	Yes	01MAR16	01MAR2016	10	Entered	54	Female	01MAR16	173	MF4637	<250 mg/day	No	Yes	<250 mg/day	No	Yes	Yes	Yes	Yes
Visit 2			Normal	Abdomen	10_007	2	Yes	01MAR16	01MAR2016	10	Entered	54	Female	01MAR16	173	MF4637	<250 mg/day	No	Yes	<250 mg/day	No	Yes	Yes	Yes	Yes
Visit 2			Normal	Dermatologic	10_007	2	Yes	01MAR16	01MAR2016	10	Entered	54	Female	01MAR16	173	MF4637	<250 mg/day	No	Yes	<250 mg/day	No	Yes	Yes	Yes	Yes
Visit 2			Normal	Musculoskeletal	10_007	2	Yes	01MAR16	01MAR2016	10	Entered	54	Female	01MAR16	173	MF4637	<250 mg/day	No	Yes	<250 mg/day	No	Yes	Yes	Yes	Yes
Visit 2			Normal	Circulatory	10_007	2	Yes	01MAR16	01MAR2016	10	Entered	54	Female	01MAR16	173	MF4637	<250 mg/day	No	Yes	<250 mg/day	No	Yes	Yes	Yes	Yes
Visit 2			Normal	Neurologic	10_007	2	Yes	01MAR16	01MAR2016	10	Entered	54	Female	01MAR16	173	MF4637	<250 mg/day	No	Yes	<250 mg/day	No	Yes	Yes	Yes	Yes
Visit 2			Normal	Lymphatic	10_007	2	Yes	01MAR16	01MAR2016	10	Entered	54	Female	01MAR16	173	MF4637	<250 mg/day	No	Yes	<250 mg/day	No	Yes	Yes	Yes	Yes
Visit 2			Normal	Respiratory	10_007	2	Yes	01MAR16	01MAR2016	10	Entered	54	Female	01MAR16	173	MF4637	<250 mg/day	No	Yes	<250 mg/day	No	Yes	Yes	Yes	Yes
Visit 2			Not done	Other, specify	10_007	2	Yes	01MAR16	01MAR2016	10	Entered	54	Female	01MAR16	173	MF4637	<250 mg/day	No	Yes	<250 mg/day	No	Yes	Yes	Yes	Yes
Visit 2			Normal	General appearance	10_009	2	Yes	27JUN16	27JUN2016	10	Entered	64	Female	27JUN16	176	MF4637	<250 mg/day	No	No	<250 mg/day	No	Yes	Yes	Yes	Yes
Visit 2			Normal	Head, eyes, ears and nose	10_009	2	Yes	27JUN16	27JUN2016	10	Entered	64	Female	27JUN16	176	MF4637	<250 mg/day	No	No	<250 mg/day	No	Yes	Yes	Yes	Yes
Visit 2			Normal	Mouth, teeth and throat	10_009	2	Yes	27JUN16	27JUN2016	10	Entered	64	Female	27JUN16	176	MF4637	<250 mg/day	No	No	<250 mg/day	No	Yes	Yes	Yes	Yes
Visit 2			Normal	Neck and thyroid	10_009	2	Yes	27JUN16	27JUN2016	10	Entered	64	Female	27JUN16	176	MF4637	<250 mg/day	No	No	<250 mg/day	No	Yes	Yes	Yes	Yes
Visit 2			Normal	Chest	10_009	2	Yes	27JUN16	27JUN2016	10	Entered	64	Female	27JUN16	176	MF4637	<250 mg/day	No	No	<250 mg/day	No	Yes	Yes	Yes	Yes
Visit 2			Normal	Heart	10_009	2	Yes	27JUN16	27JUN2016	10	Entered	64	Female	27JUN16	176	MF4637	<250 mg/day	No	No	<250 mg/day	No	Yes	Yes	Yes	Yes
Visit 2			Normal	Abdomen	10_009	2	Yes	27JUN16	27JUN2016	10	Entered	64	Female	27JUN16	176	MF4637	<250 mg/day	No	No	<250 mg/day	No	Yes	Yes	Yes	Yes
Visit 2			Normal	Dermatologic	10_009	2	Yes	27JUN16	27JUN2016	10	Entered	64	Female	27JUN16	176	MF4637	<250 mg/day	No	No	<250 mg/day	No	Yes	Yes	Yes	Yes
Visit 2			Normal	Musculoskeletal	10_009	2	Yes	27JUN16	27JUN2016	10	Entered	64	Female	27JUN16	176	MF4637	<250 mg/day	No	No	<250 mg/day	No	Yes	Yes	Yes	Yes
Visit 2			Normal	Circulatory	10_009	2	Yes	27JUN16	27JUN2016	10	Entered	64	Female	27JUN16	176	MF4637	<250 mg/day	No	No	<250 mg/day	No	Yes	Yes	Yes	Yes
Visit 2			Normal	Neurologic	10_009	2	Yes	27JUN16	27JUN2016	10	Entered	64	Female	27JUN16	176	MF4637	<250 mg/day	No	No	<250 mg/day	No	Yes	Yes	Yes	Yes
Visit 2			Normal	Lymphatic	10_009	2	Yes	27JUN16	27JUN2016	10	Entered	64	Female	27JUN16	176	MF4637	<250 mg/day	No	No	<250 mg/day	No	Yes	Yes	Yes	Yes
Visit 2			Normal	Respiratory	10_009	2	Yes	27JUN16	27JUN2016	10	Entered	64	Female	27JUN16	176	MF4637	<250 mg/day	No	No	<250 mg/day	No	Yes	Yes	Yes	Yes
Visit 2			Not done	Other, specify	10_009	2	Yes	27JUN16	27JUN2016	10	Entered	64	Female	27JUN16	176	MF4637	<250 mg/day	No	No	<250 mg/day	No	Yes	Yes	Yes	Yes
Visit 2			Normal	General appearance	10_010	2	Yes	27SEP16	27SEP2016	10	Entered	34	Male	27SEP16	175	Placebo	>=250 mg/day	No	No	>=250 mg/day	No	Yes	Yes	Yes	Yes
Visit 2			Normal	Head, eyes, ears and nose	10_010	2	Yes	27SEP16	27SEP2016	10	Entered	34	Male	27SEP16	175	Placebo	>=250 mg/day	No	No	>=250 mg/day	No	Yes	Yes	Yes	Yes
Visit 2			Normal	Mouth, teeth and throat	10_010	2	Yes	27SEP16	27SEP2016	10	Entered	34	Male	27SEP16	175	Placebo	>=250 mg/day	No	No	>=250 mg/day	No	Yes	Yes	Yes	Yes
Visit 2			Normal	Neck and thyroid	10_010	2	Yes	27SEP16	27SEP2016	10	Entered	34	Male	27SEP16	175	Placebo	>=250 mg/day	No	No	>=250 mg/day	No	Yes	Yes	Yes	Yes
Visit 2			Normal	Chest	10_010	2	Yes	27SEP16	27SEP2016	10	Entered	34	Male	27SEP16	175	Placebo	>=250 mg/day	No	No	>=250 mg/day	No	Yes	Yes	Yes	Yes
Visit 2			Normal	Heart	10_010	2	Yes	27SEP16	27SEP2016	10	Entered	34	Male	27SEP16	175	Placebo	>=250 mg/day	No	No	>=250 mg/day	No	Yes	Yes	Yes	Yes
Visit 2			Normal	Abdomen	10_010	2	Yes	27SEP16	27SEP2016	10	Entered	34	Male	27SEP16	175	Placebo	>=250 mg/day	No	No	>=250 mg/day	No	Yes	Yes	Yes	Yes
Visit 2			Normal	Dermatologic	10_010	2	Yes	27SEP16	27SEP2016	10	Entered	34	Male	27SEP16	175	Placebo	>=250 mg/day	No	No	>=250 mg/day	No	Yes	Yes	Yes	Yes
Visit 2			Normal	Musculoskeletal	10_010	2	Yes	27SEP16	27SEP2016	10	Entered	34	Male	27SEP16	175	Placebo	>=250 mg/day	No	No	>=250 mg/day	No	Yes	Yes	Yes	Yes
Visit 2			Normal	Circulatory	10_010	2	Yes	27SEP16	27SEP2016	10	Entered	34	Male	27SEP16	175	Placebo	>=250 mg/day	No	No	>=250 mg/day	No	Yes	Yes	Yes	Yes
Visit 2			Normal	Neurologic	10_010	2	Yes	27SEP16	27SEP2016	10	Entered	34	Male	27SEP16	175	Placebo	>=250 mg/day	No	No	>=250 mg/day	No	Yes	Yes	Yes	Yes
Visit 2			Normal	Lymphatic	10_010	2	Yes	27SEP16	27SEP2016	10	Entered	34	Male	27SEP16	175	Placebo	>=250 mg/day	No	No	>=250 mg/day	No	Yes	Yes	Yes	Yes
Visit 2			Normal	Respiratory	10_010	2	Yes	27SEP16	27SEP2016	10	Entered	34	Male	27SEP16	175	Placebo	>=250 mg/day	No	No	>=250 mg/day	No	Yes	Yes	Yes	Yes
Visit 2			Not done	Other, specify	10_010	2	Yes	27SEP16	27SEP2016	10	Entered	34	Male	27SEP16	175	Placebo	>=250 mg/day	No	No	>=250 mg/day	No	Yes	Yes	Yes	Yes
Visit 2			Normal	General appearance	10_012	2	Yes	12OCT16	12OCT2016	10	Entered	53	Male	12OCT16	177	Placebo	<250 mg/day	No	Yes	<250 mg/day	No	Yes	Yes	Yes	Yes
Visit 2			Normal	Head, eyes, ears and nose	10_012	2	Yes	12OCT16	12OCT2016	10	Entered	53	Male	12OCT16	177	Placebo	<250 mg/day	No	Yes	<250 mg/day	No	Yes	Yes	Yes	Yes
Visit 2			Normal	Mouth, teeth and throat	10_012	2	Yes	12OCT16	12OCT2016	10	Entered	53	Male	12OCT16	177	Placebo	<250 mg/day	No	Yes	<250 mg/day	No	Yes	Yes	Yes	Yes
Visit 2			Normal	Neck and thyroid	10_012	2	Yes	12OCT16	12OCT2016	10	Entered	53	Male	12OCT16	177	Placebo	<250 mg/day	No	Yes	<250 mg/day	No	Yes	Yes	Yes	Yes
Visit 2			Normal	Chest	10_012	2	Yes	12OCT16	12OCT2016	10	Entered	53	Male	12OCT16	177	Placebo	<250 mg/day	No	Yes	<250 mg/day	No	Yes	Yes	Yes	Yes
Visit 2			Normal	Heart	10_012	2	Yes	12OCT16	12OCT2016	10	Entered	53	Male	12OCT16	177	Placebo	<250 mg/day	No	Yes	<250 mg/day	No	Yes	Yes	Yes	Yes
Visit 2		minimal tenderness right upper quadrant	Abnormal	Abdomen	10_012	2	Yes	12OCT16	12OCT2016	10	Entered	53	Male	12OCT16	177	Placebo	<250 mg/day	No	Yes	<250 mg/day	No	Yes	Yes	Yes	Yes
Visit 2			Normal	Dermatologic	10_012	2	Yes	12OCT16	12OCT2016	10	Entered	53	Male	12OCT16	177	Placebo	<250 mg/day	No	Yes	<250 mg/day	No	Yes	Yes	Yes	Yes
Visit 2			Normal	Musculoskeletal	10_012	2	Yes	12OCT16	12OCT2016	10	Entered	53	Male	12OCT16	177	Placebo	<250 mg/day	No	Yes	<250 mg/day	No	Yes	Yes	Yes	Yes
Visit 2			Normal	Circulatory	10_012	2	Yes	12OCT16	12OCT2016	10	Entered	53	Male	12OCT16	177	Placebo	<250 mg/day	No	Yes	<250 mg/day	No	Yes	Yes	Yes	Yes
Visit 2			Normal	Neurologic	10_012	2	Yes	12OCT16	12OCT2016	10	Entered	53	Male	12OCT16	177	Placebo	<250 mg/day	No	Yes	<250 mg/day	No	Yes	Yes	Yes	Yes
Visit 2			Normal	Lymphatic	10_012	2	Yes	12OCT16	12OCT2016	10	Entered	53	Male	12OCT16	177	Placebo	<250 mg/day	No	Yes	<250 mg/day	No	Yes	Yes	Yes	Yes
Visit 2			Normal	Respiratory	10_012	2	Yes	12OCT16	12OCT2016	10	Entered	53	Male	12OCT16	177	Placebo	<250 mg/day	No	Yes	<250 mg/day	No	Yes	Yes	Yes	Yes
Visit 2			Not done	Other, specify	10_012	2	Yes	12OCT16	12OCT2016	10	Entered	53	Male	12OCT16	177	Placebo	<250 mg/day	No	Yes	<250 mg/day	No	Yes	Yes	Yes	Yes
Visit 2			Normal	General appearance	11_003	2	Yes	15SEP16	15SEP2016	11	Early Termination	52	Male	15SEP16	142	Placebo	<250 mg/day	Yes	Yes	>=250 mg/day	No	Yes	Yes	Yes	Yes
Visit 2			Normal	Head, eyes, ears and nose	11_003	2	Yes	15SEP16	15SEP2016	11	Early Termination	52	Male	15SEP16	142	Placebo	<250 mg/day	Yes	Yes	>=250 mg/day	No	Yes	Yes	Yes	Yes
Visit 2			Normal	Mouth, teeth and throat	11_003	2	Yes	15SEP16	15SEP2016	11	Early Termination	52	Male	15SEP16	142	Placebo	<250 mg/day	Yes	Yes	>=250 mg/day	No	Yes	Yes	Yes	Yes
Visit 2			Normal	Neck and thyroid	11_003	2	Yes	15SEP16	15SEP2016	11	Early Termination	52	Male	15SEP16	142	Placebo	<250 mg/day	Yes	Yes	>=250 mg/day	No	Yes	Yes	Yes	Yes
Visit 2			Normal	Chest	11_003	2	Yes	15SEP16	15SEP2016	11	Early Termination	52	Male	15SEP16	142	Placebo	<250 mg/day	Yes	Yes	>=250 mg/day	No	Yes	Yes	Yes	Yes
Visit 2			Normal	Heart	11_003	2	Yes	15SEP16	15SEP2016	11	Early Termination	52	Male	15SEP16	142	Placebo	<250 mg/day	Yes	Yes	>=250 mg/day	No	Yes	Yes	Yes	Yes
Visit 2			Normal	Abdomen	11_003	2	Yes	15SEP16	15SEP2016	11	Early Termination	52	Male	15SEP16	142	Placebo	<250 mg/day	Yes	Yes	>=250 mg/day	No	Yes	Yes	Yes	Yes
Visit 2			Normal	Dermatologic	11_003	2	Yes	15SEP16	15SEP2016	11	Early Termination	52	Male	15SEP16	142	Placebo	<250 mg/day	Yes	Yes	>=250 mg/day	No	Yes	Yes	Yes	Yes
Visit 2			Normal	Musculoskeletal	11_003	2	Yes	15SEP16	15SEP2016	11	Early Termination	52	Male	15SEP16	142	Placebo	<250 mg/day	Yes	Yes	>=250 mg/day	No	Yes	Yes	Yes	Yes
Visit 2			Normal	Circulatory	11_003	2	Yes	15SEP16	15SEP2016	11	Early Termination	52	Male	15SEP16	142	Placebo	<250 mg/day	Yes	Yes	>=250 mg/day	No	Yes	Yes	Yes	Yes
Visit 2			Normal	Neurologic	11_003	2	Yes	15SEP16	15SEP2016	11	Early Termination	52	Male	15SEP16	142	Placebo	<250 mg/day	Yes	Yes	>=250 mg/day	No	Yes	Yes	Yes	Yes
Visit 2			Normal	Lymphatic	11_003	2	Yes	15SEP16	15SEP2016	11	Early Termination	52	Male	15SEP16	142	Placebo	<250 mg/day	Yes	Yes	>=250 mg/day	No	Yes	Yes	Yes	Yes
Visit 2			Normal	Respiratory	11_003	2	Yes	15SEP16	15SEP2016	11	Early Termination	52	Male	15SEP16	142	Placebo	<250 mg/day	Yes	Yes	>=250 mg/day	No	Yes	Yes	Yes	Yes
Visit 2			Not done	Other, specify	11_003	2	Yes	15SEP16	15SEP2016	11	Early Termination	52	Male	15SEP16	142	Placebo	<250 mg/day	Yes	Yes	>=250 mg/day	No	Yes	Yes	Yes	Yes
Visit 2			Normal	General appearance	11_004	2	Yes	02SEP16	02SEP2016	11	Entered	42	Female	02SEP16	140	MF4637	<250 mg/day	Yes	No	<250 mg/day	No	Yes	Yes	Yes	Yes
Visit 2			Normal	Head, eyes, ears and nose	11_004	2	Yes	02SEP16	02SEP2016	11	Entered	42	Female	02SEP16	140	MF4637	<250 mg/day	Yes	No	<250 mg/day	No	Yes	Yes	Yes	Yes
Visit 2			Normal	Mouth, teeth and throat	11_004	2	Yes	02SEP16	02SEP2016	11	Entered	42	Female	02SEP16	140	MF4637	<250 mg/day	Yes	No	<250 mg/day	No	Yes	Yes	Yes	Yes
Visit 2			Normal	Neck and thyroid	11_004	2	Yes	02SEP16	02SEP2016	11	Entered	42	Female	02SEP16	140	MF4637	<250 mg/day	Yes	No	<250 mg/day	No	Yes	Yes	Yes	Yes
Visit 2			Normal	Chest	11_004	2	Yes	02SEP16	02SEP2016	11	Entered	42	Female	02SEP16	140	MF4637	<250 mg/day	Yes	No	<250 mg/day	No	Yes	Yes	Yes	Yes
Visit 2			Normal	Heart	11_004	2	Yes	02SEP16	02SEP2016	11	Entered	42	Female	02SEP16	140	MF4637	<250 mg/day	Yes	No	<250 mg/day	No	Yes	Yes	Yes	Yes
Visit 2			Normal	Abdomen	11_004	2	Yes	02SEP16	02SEP2016	11	Entered	42	Female	02SEP16	140	MF4637	<250 mg/day	Yes	No	<250 mg/day	No	Yes	Yes	Yes	Yes
Visit 2			Normal	Dermatologic	11_004	2	Yes	02SEP16	02SEP2016	11	Entered	42	Female	02SEP16	140	MF4637	<250 mg/day	Yes	No	<250 mg/day	No	Yes	Yes	Yes	Yes
Visit 2			Normal	Musculoskeletal	11_004	2	Yes	02SEP16	02SEP2016	11	Entered	42	Female	02SEP16	140	MF4637	<250 mg/day	Yes	No	<250 mg/day	No	Yes	Yes	Yes	Yes
Visit 2			Normal	Circulatory	11_004	2	Yes	02SEP16	02SEP2016	11	Entered	42	Female	02SEP16	140	MF4637	<250 mg/day	Yes	No	<250 mg/day	No	Yes	Yes	Yes	Yes
Visit 2			Normal	Neurologic	11_004	2	Yes	02SEP16	02SEP2016	11	Entered	42	Female	02SEP16	140	MF4637	<250 mg/day	Yes	No	<250 mg/day	No	Yes	Yes	Yes	Yes
Visit 2			Normal	Lymphatic	11_004	2	Yes	02SEP16	02SEP2016	11	Entered	42	Female	02SEP16	140	MF4637	<250 mg/day	Yes	No	<250 mg/day	No	Yes	Yes	Yes	Yes
Visit 2			Normal	Respiratory	11_004	2	Yes	02SEP16	02SEP2016	11	Entered	42	Female	02SEP16	140	MF4637	<250 mg/day	Yes	No	<250 mg/day	No	Yes	Yes	Yes	Yes
Visit 2			Not done	Other, specify	11_004	2	Yes	02SEP16	02SEP2016	11	Entered	42	Female	02SEP16	140	MF4637	<250 mg/day	Yes	No	<250 mg/day	No	Yes	Yes	Yes	Yes
Visit 2			Normal	General appearance	11_005	2	Yes	26SEP16	26SEP2016	11	Early Termination	63	Male	26SEP16	141	MF4637	>=250 mg/day	No	No	>=250 mg/day	No	Yes	Yes	No	No
Visit 2			Normal	Head, eyes, ears and nose	11_005	2	Yes	26SEP16	26SEP2016	11	Early Termination	63	Male	26SEP16	141	MF4637	>=250 mg/day	No	No	>=250 mg/day	No	Yes	Yes	No	No
Visit 2			Normal	Mouth, teeth and throat	11_005	2	Yes	26SEP16	26SEP2016	11	Early Termination	63	Male	26SEP16	141	MF4637	>=250 mg/day	No	No	>=250 mg/day	No	Yes	Yes	No	No
Visit 2			Normal	Neck and thyroid	11_005	2	Yes	26SEP16	26SEP2016	11	Early Termination	63	Male	26SEP16	141	MF4637	>=250 mg/day	No	No	>=250 mg/day	No	Yes	Yes	No	No
Visit 2			Normal	Chest	11_005	2	Yes	26SEP16	26SEP2016	11	Early Termination	63	Male	26SEP16	141	MF4637	>=250 mg/day	No	No	>=250 mg/day	No	Yes	Yes	No	No
Visit 2			Normal	Heart	11_005	2	Yes	26SEP16	26SEP2016	11	Early Termination	63	Male	26SEP16	141	MF4637	>=250 mg/day	No	No	>=250 mg/day	No	Yes	Yes	No	No
Visit 2			Normal	Abdomen	11_005	2	Yes	26SEP16	26SEP2016	11	Early Termination	63	Male	26SEP16	141	MF4637	>=250 mg/day	No	No	>=250 mg/day	No	Yes	Yes	No	No
Visit 2			Normal	Dermatologic	11_005	2	Yes	26SEP16	26SEP2016	11	Early Termination	63	Male	26SEP16	141	MF4637	>=250 mg/day	No	No	>=250 mg/day	No	Yes	Yes	No	No
Visit 2			Normal	Musculoskeletal	11_005	2	Yes	26SEP16	26SEP2016	11	Early Termination	63	Male	26SEP16	141	MF4637	>=250 mg/day	No	No	>=250 mg/day	No	Yes	Yes	No	No
Visit 2			Normal	Circulatory	11_005	2	Yes	26SEP16	26SEP2016	11	Early Termination	63	Male	26SEP16	141	MF4637	>=250 mg/day	No	No	>=250 mg/day	No	Yes	Yes	No	No
Visit 2			Normal	Neurologic	11_005	2	Yes	26SEP16	26SEP2016	11	Early Termination	63	Male	26SEP16	141	MF4637	>=250 mg/day	No	No	>=250 mg/day	No	Yes	Yes	No	No
Visit 2			Normal	Lymphatic	11_005	2	Yes	26SEP16	26SEP2016	11	Early Termination	63	Male	26SEP16	141	MF4637	>=250 mg/day	No	No	>=250 mg/day	No	Yes	Yes	No	No
Visit 2			Normal	Respiratory	11_005	2	Yes	26SEP16	26SEP2016	11	Early Termination	63	Male	26SEP16	141	MF4637	>=250 mg/day	No	No	>=250 mg/day	No	Yes	Yes	No	No
Visit 2			Not done	Other, specify	11_005	2	Yes	26SEP16	26SEP2016	11	Early Termination	63	Male	26SEP16	141	MF4637	>=250 mg/day	No	No	>=250 mg/day	No	Yes	Yes	No	No
Visit 2			Normal	General appearance	11_006	2	Yes	29SEP16	29SEP2016	11	Entered	54	Female	29SEP16	146	Placebo	<250 mg/day	Yes	No	>=250 mg/day	No	Yes	Yes	Yes	Yes
Visit 2			Normal	Head, eyes, ears and nose	11_006	2	Yes	29SEP16	29SEP2016	11	Entered	54	Female	29SEP16	146	Placebo	<250 mg/day	Yes	No	>=250 mg/day	No	Yes	Yes	Yes	Yes
Visit 2			Normal	Mouth, teeth and throat	11_006	2	Yes	29SEP16	29SEP2016	11	Entered	54	Female	29SEP16	146	Placebo	<250 mg/day	Yes	No	>=250 mg/day	No	Yes	Yes	Yes	Yes
Visit 2			Normal	Neck and thyroid	11_006	2	Yes	29SEP16	29SEP2016	11	Entered	54	Female	29SEP16	146	Placebo	<250 mg/day	Yes	No	>=250 mg/day	No	Yes	Yes	Yes	Yes
Visit 2			Normal	Chest	11_006	2	Yes	29SEP16	29SEP2016	11	Entered	54	Female	29SEP16	146	Placebo	<250 mg/day	Yes	No	>=250 mg/day	No	Yes	Yes	Yes	Yes
Visit 2			Normal	Heart	11_006	2	Yes	29SEP16	29SEP2016	11	Entered	54	Female	29SEP16	146	Placebo	<250 mg/day	Yes	No	>=250 mg/day	No	Yes	Yes	Yes	Yes
Visit 2			Normal	Abdomen	11_006	2	Yes	29SEP16	29SEP2016	11	Entered	54	Female	29SEP16	146	Placebo	<250 mg/day	Yes	No	>=250 mg/day	No	Yes	Yes	Yes	Yes
Visit 2			Normal	Dermatologic	11_006	2	Yes	29SEP16	29SEP2016	11	Entered	54	Female	29SEP16	146	Placebo	<250 mg/day	Yes	No	>=250 mg/day	No	Yes	Yes	Yes	Yes
Visit 2			Normal	Musculoskeletal	11_006	2	Yes	29SEP16	29SEP2016	11	Entered	54	Female	29SEP16	146	Placebo	<250 mg/day	Yes	No	>=250 mg/day	No	Yes	Yes	Yes	Yes
Visit 2			Normal	Circulatory	11_006	2	Yes	29SEP16	29SEP2016	11	Entered	54	Female	29SEP16	146	Placebo	<250 mg/day	Yes	No	>=250 mg/day	No	Yes	Yes	Yes	Yes
Visit 2			Normal	Neurologic	11_006	2	Yes	29SEP16	29SEP2016	11	Entered	54	Female	29SEP16	146	Placebo	<250 mg/day	Yes	No	>=250 mg/day	No	Yes	Yes	Yes	Yes
Visit 2			Normal	Lymphatic	11_006	2	Yes	29SEP16	29SEP2016	11	Entered	54	Female	29SEP16	146	Placebo	<250 mg/day	Yes	No	>=250 mg/day	No	Yes	Yes	Yes	Yes
Visit 2			Normal	Respiratory	11_006	2	Yes	29SEP16	29SEP2016	11	Entered	54	Female	29SEP16	146	Placebo	<250 mg/day	Yes	No	>=250 mg/day	No	Yes	Yes	Yes	Yes
Visit 2			Not done	Other, specify	11_006	2	Yes	29SEP16	29SEP2016	11	Entered	54	Female	29SEP16	146	Placebo	<250 mg/day	Yes	No	>=250 mg/day	No	Yes	Yes	Yes	Yes
Visit 2			Normal	General appearance	11_008	2	Yes	27SEP16	27SEP2016	11	Entered	42	Male	27SEP16	144	MF4637	<250 mg/day	No	No	>=250 mg/day	No	Yes	Yes	Yes	Yes
Visit 2			Normal	Head, eyes, ears and nose	11_008	2	Yes	27SEP16	27SEP2016	11	Entered	42	Male	27SEP16	144	MF4637	<250 mg/day	No	No	>=250 mg/day	No	Yes	Yes	Yes	Yes
Visit 2			Normal	Mouth, teeth and throat	11_008	2	Yes	27SEP16	27SEP2016	11	Entered	42	Male	27SEP16	144	MF4637	<250 mg/day	No	No	>=250 mg/day	No	Yes	Yes	Yes	Yes
Visit 2			Normal	Neck and thyroid	11_008	2	Yes	27SEP16	27SEP2016	11	Entered	42	Male	27SEP16	144	MF4637	<250 mg/day	No	No	>=250 mg/day	No	Yes	Yes	Yes	Yes
Visit 2			Normal	Chest	11_008	2	Yes	27SEP16	27SEP2016	11	Entered	42	Male	27SEP16	144	MF4637	<250 mg/day	No	No	>=250 mg/day	No	Yes	Yes	Yes	Yes
Visit 2			Normal	Heart	11_008	2	Yes	27SEP16	27SEP2016	11	Entered	42	Male	27SEP16	144	MF4637	<250 mg/day	No	No	>=250 mg/day	No	Yes	Yes	Yes	Yes
Visit 2			Normal	Abdomen	11_008	2	Yes	27SEP16	27SEP2016	11	Entered	42	Male	27SEP16	144	MF4637	<250 mg/day	No	No	>=250 mg/day	No	Yes	Yes	Yes	Yes
Visit 2			Normal	Dermatologic	11_008	2	Yes	27SEP16	27SEP2016	11	Entered	42	Male	27SEP16	144	MF4637	<250 mg/day	No	No	>=250 mg/day	No	Yes	Yes	Yes	Yes
Visit 2			Normal	Musculoskeletal	11_008	2	Yes	27SEP16	27SEP2016	11	Entered	42	Male	27SEP16	144	MF4637	<250 mg/day	No	No	>=250 mg/day	No	Yes	Yes	Yes	Yes
Visit 2			Normal	Circulatory	11_008	2	Yes	27SEP16	27SEP2016	11	Entered	42	Male	27SEP16	144	MF4637	<250 mg/day	No	No	>=250 mg/day	No	Yes	Yes	Yes	Yes
Visit 2			Normal	Neurologic	11_008	2	Yes	27SEP16	27SEP2016	11	Entered	42	Male	27SEP16	144	MF4637	<250 mg/day	No	No	>=250 mg/day	No	Yes	Yes	Yes	Yes
Visit 2			Normal	Lymphatic	11_008	2	Yes	27SEP16	27SEP2016	11	Entered	42	Male	27SEP16	144	MF4637	<250 mg/day	No	No	>=250 mg/day	No	Yes	Yes	Yes	Yes
Visit 2			Normal	Respiratory	11_008	2	Yes	27SEP16	27SEP2016	11	Entered	42	Male	27SEP16	144	MF4637	<250 mg/day	No	No	>=250 mg/day	No	Yes	Yes	Yes	Yes
Visit 2			Not done	Other, specify	11_008	2	Yes	27SEP16	27SEP2016	11	Entered	42	Male	27SEP16	144	MF4637	<250 mg/day	No	No	>=250 mg/day	No	Yes	Yes	Yes	Yes
Visit 2			Normal	General appearance	11_009	2	Yes	30SEP16	30SEP2016	11	Entered	50	Female	01OCT16	147	Placebo	<250 mg/day	No	No	<250 mg/day	No	Yes	Yes	Yes	Yes
Visit 2			Normal	Head, eyes, ears and nose	11_009	2	Yes	30SEP16	30SEP2016	11	Entered	50	Female	01OCT16	147	Placebo	<250 mg/day	No	No	<250 mg/day	No	Yes	Yes	Yes	Yes
Visit 2			Normal	Mouth, teeth and throat	11_009	2	Yes	30SEP16	30SEP2016	11	Entered	50	Female	01OCT16	147	Placebo	<250 mg/day	No	No	<250 mg/day	No	Yes	Yes	Yes	Yes
Visit 2			Normal	Neck and thyroid	11_009	2	Yes	30SEP16	30SEP2016	11	Entered	50	Female	01OCT16	147	Placebo	<250 mg/day	No	No	<250 mg/day	No	Yes	Yes	Yes	Yes
Visit 2			Normal	Chest	11_009	2	Yes	30SEP16	30SEP2016	11	Entered	50	Female	01OCT16	147	Placebo	<250 mg/day	No	No	<250 mg/day	No	Yes	Yes	Yes	Yes
Visit 2			Normal	Heart	11_009	2	Yes	30SEP16	30SEP2016	11	Entered	50	Female	01OCT16	147	Placebo	<250 mg/day	No	No	<250 mg/day	No	Yes	Yes	Yes	Yes
Visit 2			Normal	Abdomen	11_009	2	Yes	30SEP16	30SEP2016	11	Entered	50	Female	01OCT16	147	Placebo	<250 mg/day	No	No	<250 mg/day	No	Yes	Yes	Yes	Yes
Visit 2			Normal	Dermatologic	11_009	2	Yes	30SEP16	30SEP2016	11	Entered	50	Female	01OCT16	147	Placebo	<250 mg/day	No	No	<250 mg/day	No	Yes	Yes	Yes	Yes
Visit 2			Normal	Musculoskeletal	11_009	2	Yes	30SEP16	30SEP2016	11	Entered	50	Female	01OCT16	147	Placebo	<250 mg/day	No	No	<250 mg/day	No	Yes	Yes	Yes	Yes
Visit 2			Normal	Circulatory	11_009	2	Yes	30SEP16	30SEP2016	11	Entered	50	Female	01OCT16	147	Placebo	<250 mg/day	No	No	<250 mg/day	No	Yes	Yes	Yes	Yes
Visit 2			Normal	Neurologic	11_009	2	Yes	30SEP16	30SEP2016	11	Entered	50	Female	01OCT16	147	Placebo	<250 mg/day	No	No	<250 mg/day	No	Yes	Yes	Yes	Yes
Visit 2			Normal	Lymphatic	11_009	2	Yes	30SEP16	30SEP2016	11	Entered	50	Female	01OCT16	147	Placebo	<250 mg/day	No	No	<250 mg/day	No	Yes	Yes	Yes	Yes
Visit 2			Normal	Respiratory	11_009	2	Yes	30SEP16	30SEP2016	11	Entered	50	Female	01OCT16	147	Placebo	<250 mg/day	No	No	<250 mg/day	No	Yes	Yes	Yes	Yes
Visit 2			Not done	Other, specify	11_009	2	Yes	30SEP16	30SEP2016	11	Entered	50	Female	01OCT16	147	Placebo	<250 mg/day	No	No	<250 mg/day	No	Yes	Yes	Yes	Yes
Visit 2			Normal	General appearance	11_010	2	Yes	27SEP16	27SEP2016	11	Entered	52	Female	27SEP16	143	Placebo	<250 mg/day	No	Yes	<250 mg/day	No	Yes	Yes	Yes	Yes
Visit 2			Normal	Head, eyes, ears and nose	11_010	2	Yes	27SEP16	27SEP2016	11	Entered	52	Female	27SEP16	143	Placebo	<250 mg/day	No	Yes	<250 mg/day	No	Yes	Yes	Yes	Yes
Visit 2			Normal	Mouth, teeth and throat	11_010	2	Yes	27SEP16	27SEP2016	11	Entered	52	Female	27SEP16	143	Placebo	<250 mg/day	No	Yes	<250 mg/day	No	Yes	Yes	Yes	Yes
Visit 2			Normal	Neck and thyroid	11_010	2	Yes	27SEP16	27SEP2016	11	Entered	52	Female	27SEP16	143	Placebo	<250 mg/day	No	Yes	<250 mg/day	No	Yes	Yes	Yes	Yes
Visit 2			Normal	Chest	11_010	2	Yes	27SEP16	27SEP2016	11	Entered	52	Female	27SEP16	143	Placebo	<250 mg/day	No	Yes	<250 mg/day	No	Yes	Yes	Yes	Yes
Visit 2			Normal	Heart	11_010	2	Yes	27SEP16	27SEP2016	11	Entered	52	Female	27SEP16	143	Placebo	<250 mg/day	No	Yes	<250 mg/day	No	Yes	Yes	Yes	Yes
Visit 2			Normal	Abdomen	11_010	2	Yes	27SEP16	27SEP2016	11	Entered	52	Female	27SEP16	143	Placebo	<250 mg/day	No	Yes	<250 mg/day	No	Yes	Yes	Yes	Yes
Visit 2			Normal	Dermatologic	11_010	2	Yes	27SEP16	27SEP2016	11	Entered	52	Female	27SEP16	143	Placebo	<250 mg/day	No	Yes	<250 mg/day	No	Yes	Yes	Yes	Yes
Visit 2			Normal	Musculoskeletal	11_010	2	Yes	27SEP16	27SEP2016	11	Entered	52	Female	27SEP16	143	Placebo	<250 mg/day	No	Yes	<250 mg/day	No	Yes	Yes	Yes	Yes
Visit 2			Normal	Circulatory	11_010	2	Yes	27SEP16	27SEP2016	11	Entered	52	Female	27SEP16	143	Placebo	<250 mg/day	No	Yes	<250 mg/day	No	Yes	Yes	Yes	Yes
Visit 2			Normal	Neurologic	11_010	2	Yes	27SEP16	27SEP2016	11	Entered	52	Female	27SEP16	143	Placebo	<250 mg/day	No	Yes	<250 mg/day	No	Yes	Yes	Yes	Yes
Visit 2			Normal	Lymphatic	11_010	2	Yes	27SEP16	27SEP2016	11	Entered	52	Female	27SEP16	143	Placebo	<250 mg/day	No	Yes	<250 mg/day	No	Yes	Yes	Yes	Yes
Visit 2			Normal	Respiratory	11_010	2	Yes	27SEP16	27SEP2016	11	Entered	52	Female	27SEP16	143	Placebo	<250 mg/day	No	Yes	<250 mg/day	No	Yes	Yes	Yes	Yes
Visit 2			Not done	Other, specify	11_010	2	Yes	27SEP16	27SEP2016	11	Entered	52	Female	27SEP16	143	Placebo	<250 mg/day	No	Yes	<250 mg/day	No	Yes	Yes	Yes	Yes
Visit 2			Normal	General appearance	11_011	2	Yes	17OCT16	17OCT2016	11	Entered	41	Female	19OCT16	244	Placebo	<250 mg/day	No	No	>=250 mg/day	No	Yes	Yes	Yes	Yes
Visit 2			Normal	Head, eyes, ears and nose	11_011	2	Yes	17OCT16	17OCT2016	11	Entered	41	Female	19OCT16	244	Placebo	<250 mg/day	No	No	>=250 mg/day	No	Yes	Yes	Yes	Yes
Visit 2			Normal	Mouth, teeth and throat	11_011	2	Yes	17OCT16	17OCT2016	11	Entered	41	Female	19OCT16	244	Placebo	<250 mg/day	No	No	>=250 mg/day	No	Yes	Yes	Yes	Yes
Visit 2			Normal	Neck and thyroid	11_011	2	Yes	17OCT16	17OCT2016	11	Entered	41	Female	19OCT16	244	Placebo	<250 mg/day	No	No	>=250 mg/day	No	Yes	Yes	Yes	Yes
Visit 2			Normal	Chest	11_011	2	Yes	17OCT16	17OCT2016	11	Entered	41	Female	19OCT16	244	Placebo	<250 mg/day	No	No	>=250 mg/day	No	Yes	Yes	Yes	Yes
Visit 2			Normal	Heart	11_011	2	Yes	17OCT16	17OCT2016	11	Entered	41	Female	19OCT16	244	Placebo	<250 mg/day	No	No	>=250 mg/day	No	Yes	Yes	Yes	Yes
Visit 2			Normal	Abdomen	11_011	2	Yes	17OCT16	17OCT2016	11	Entered	41	Female	19OCT16	244	Placebo	<250 mg/day	No	No	>=250 mg/day	No	Yes	Yes	Yes	Yes
Visit 2			Normal	Dermatologic	11_011	2	Yes	17OCT16	17OCT2016	11	Entered	41	Female	19OCT16	244	Placebo	<250 mg/day	No	No	>=250 mg/day	No	Yes	Yes	Yes	Yes
Visit 2			Normal	Musculoskeletal	11_011	2	Yes	17OCT16	17OCT2016	11	Entered	41	Female	19OCT16	244	Placebo	<250 mg/day	No	No	>=250 mg/day	No	Yes	Yes	Yes	Yes
Visit 2			Normal	Circulatory	11_011	2	Yes	17OCT16	17OCT2016	11	Entered	41	Female	19OCT16	244	Placebo	<250 mg/day	No	No	>=250 mg/day	No	Yes	Yes	Yes	Yes
Visit 2			Normal	Neurologic	11_011	2	Yes	17OCT16	17OCT2016	11	Entered	41	Female	19OCT16	244	Placebo	<250 mg/day	No	No	>=250 mg/day	No	Yes	Yes	Yes	Yes
Visit 2			Normal	Lymphatic	11_011	2	Yes	17OCT16	17OCT2016	11	Entered	41	Female	19OCT16	244	Placebo	<250 mg/day	No	No	>=250 mg/day	No	Yes	Yes	Yes	Yes
Visit 2			Normal	Respiratory	11_011	2	Yes	17OCT16	17OCT2016	11	Entered	41	Female	19OCT16	244	Placebo	<250 mg/day	No	No	>=250 mg/day	No	Yes	Yes	Yes	Yes
Visit 2			Not done	Other, specify	11_011	2	Yes	17OCT16	17OCT2016	11	Entered	41	Female	19OCT16	244	Placebo	<250 mg/day	No	No	>=250 mg/day	No	Yes	Yes	Yes	Yes
Visit 2			Normal	General appearance	11_012	2	Yes	17OCT16	17OCT2016	11	Entered	40	Female	18OCT16	145	MF4637	<250 mg/day	No	No	<250 mg/day	No	Yes	Yes	Yes	Yes
Visit 2			Normal	Head, eyes, ears and nose	11_012	2	Yes	17OCT16	17OCT2016	11	Entered	40	Female	18OCT16	145	MF4637	<250 mg/day	No	No	<250 mg/day	No	Yes	Yes	Yes	Yes
Visit 2			Normal	Mouth, teeth and throat	11_012	2	Yes	17OCT16	17OCT2016	11	Entered	40	Female	18OCT16	145	MF4637	<250 mg/day	No	No	<250 mg/day	No	Yes	Yes	Yes	Yes
Visit 2			Normal	Neck and thyroid	11_012	2	Yes	17OCT16	17OCT2016	11	Entered	40	Female	18OCT16	145	MF4637	<250 mg/day	No	No	<250 mg/day	No	Yes	Yes	Yes	Yes
Visit 2			Normal	Chest	11_012	2	Yes	17OCT16	17OCT2016	11	Entered	40	Female	18OCT16	145	MF4637	<250 mg/day	No	No	<250 mg/day	No	Yes	Yes	Yes	Yes
Visit 2			Normal	Heart	11_012	2	Yes	17OCT16	17OCT2016	11	Entered	40	Female	18OCT16	145	MF4637	<250 mg/day	No	No	<250 mg/day	No	Yes	Yes	Yes	Yes
Visit 2			Normal	Abdomen	11_012	2	Yes	17OCT16	17OCT2016	11	Entered	40	Female	18OCT16	145	MF4637	<250 mg/day	No	No	<250 mg/day	No	Yes	Yes	Yes	Yes
Visit 2			Normal	Dermatologic	11_012	2	Yes	17OCT16	17OCT2016	11	Entered	40	Female	18OCT16	145	MF4637	<250 mg/day	No	No	<250 mg/day	No	Yes	Yes	Yes	Yes
Visit 2			Normal	Musculoskeletal	11_012	2	Yes	17OCT16	17OCT2016	11	Entered	40	Female	18OCT16	145	MF4637	<250 mg/day	No	No	<250 mg/day	No	Yes	Yes	Yes	Yes
Visit 2			Normal	Circulatory	11_012	2	Yes	17OCT16	17OCT2016	11	Entered	40	Female	18OCT16	145	MF4637	<250 mg/day	No	No	<250 mg/day	No	Yes	Yes	Yes	Yes
Visit 2			Normal	Neurologic	11_012	2	Yes	17OCT16	17OCT2016	11	Entered	40	Female	18OCT16	145	MF4637	<250 mg/day	No	No	<250 mg/day	No	Yes	Yes	Yes	Yes
Visit 2			Normal	Lymphatic	11_012	2	Yes	17OCT16	17OCT2016	11	Entered	40	Female	18OCT16	145	MF4637	<250 mg/day	No	No	<250 mg/day	No	Yes	Yes	Yes	Yes
Visit 2			Normal	Respiratory	11_012	2	Yes	17OCT16	17OCT2016	11	Entered	40	Female	18OCT16	145	MF4637	<250 mg/day	No	No	<250 mg/day	No	Yes	Yes	Yes	Yes
Visit 2			Not done	Other, specify	11_012	2	Yes	17OCT16	17OCT2016	11	Entered	40	Female	18OCT16	145	MF4637	<250 mg/day	No	No	<250 mg/day	No	Yes	Yes	Yes	Yes
Visit 2			Normal	General appearance	11_014	2	Yes	16NOV16	16NOV2016	11	Entered	49	Female	17NOV16	247	Placebo	>=250 mg/day	No	No	>=250 mg/day	No	Yes	Yes	Yes	No
Visit 2			Normal	Head, eyes, ears and nose	11_014	2	Yes	16NOV16	16NOV2016	11	Entered	49	Female	17NOV16	247	Placebo	>=250 mg/day	No	No	>=250 mg/day	No	Yes	Yes	Yes	No
Visit 2			Normal	Mouth, teeth and throat	11_014	2	Yes	16NOV16	16NOV2016	11	Entered	49	Female	17NOV16	247	Placebo	>=250 mg/day	No	No	>=250 mg/day	No	Yes	Yes	Yes	No
Visit 2			Normal	Neck and thyroid	11_014	2	Yes	16NOV16	16NOV2016	11	Entered	49	Female	17NOV16	247	Placebo	>=250 mg/day	No	No	>=250 mg/day	No	Yes	Yes	Yes	No
Visit 2			Normal	Chest	11_014	2	Yes	16NOV16	16NOV2016	11	Entered	49	Female	17NOV16	247	Placebo	>=250 mg/day	No	No	>=250 mg/day	No	Yes	Yes	Yes	No
Visit 2			Normal	Heart	11_014	2	Yes	16NOV16	16NOV2016	11	Entered	49	Female	17NOV16	247	Placebo	>=250 mg/day	No	No	>=250 mg/day	No	Yes	Yes	Yes	No
Visit 2			Normal	Abdomen	11_014	2	Yes	16NOV16	16NOV2016	11	Entered	49	Female	17NOV16	247	Placebo	>=250 mg/day	No	No	>=250 mg/day	No	Yes	Yes	Yes	No
Visit 2			Normal	Dermatologic	11_014	2	Yes	16NOV16	16NOV2016	11	Entered	49	Female	17NOV16	247	Placebo	>=250 mg/day	No	No	>=250 mg/day	No	Yes	Yes	Yes	No
Visit 2			Normal	Musculoskeletal	11_014	2	Yes	16NOV16	16NOV2016	11	Entered	49	Female	17NOV16	247	Placebo	>=250 mg/day	No	No	>=250 mg/day	No	Yes	Yes	Yes	No
Visit 2			Normal	Circulatory	11_014	2	Yes	16NOV16	16NOV2016	11	Entered	49	Female	17NOV16	247	Placebo	>=250 mg/day	No	No	>=250 mg/day	No	Yes	Yes	Yes	No
Visit 2			Normal	Neurologic	11_014	2	Yes	16NOV16	16NOV2016	11	Entered	49	Female	17NOV16	247	Placebo	>=250 mg/day	No	No	>=250 mg/day	No	Yes	Yes	Yes	No
Visit 2			Normal	Lymphatic	11_014	2	Yes	16NOV16	16NOV2016	11	Entered	49	Female	17NOV16	247	Placebo	>=250 mg/day	No	No	>=250 mg/day	No	Yes	Yes	Yes	No
Visit 2			Normal	Respiratory	11_014	2	Yes	16NOV16	16NOV2016	11	Entered	49	Female	17NOV16	247	Placebo	>=250 mg/day	No	No	>=250 mg/day	No	Yes	Yes	Yes	No
Visit 2			Not done	Other, specify	11_014	2	Yes	16NOV16	16NOV2016	11	Entered	49	Female	17NOV16	247	Placebo	>=250 mg/day	No	No	>=250 mg/day	No	Yes	Yes	Yes	No
Visit 2			Normal	General appearance	11_015	2	Yes	10NOV16	10NOV2016	11	Entered	62	Male	10NOV16	245	MF4637	<250 mg/day	No	No	>=250 mg/day	No	Yes	Yes	Yes	Yes
Visit 2			Normal	Head, eyes, ears and nose	11_015	2	Yes	10NOV16	10NOV2016	11	Entered	62	Male	10NOV16	245	MF4637	<250 mg/day	No	No	>=250 mg/day	No	Yes	Yes	Yes	Yes
Visit 2			Normal	Mouth, teeth and throat	11_015	2	Yes	10NOV16	10NOV2016	11	Entered	62	Male	10NOV16	245	MF4637	<250 mg/day	No	No	>=250 mg/day	No	Yes	Yes	Yes	Yes
Visit 2			Normal	Neck and thyroid	11_015	2	Yes	10NOV16	10NOV2016	11	Entered	62	Male	10NOV16	245	MF4637	<250 mg/day	No	No	>=250 mg/day	No	Yes	Yes	Yes	Yes
Visit 2			Normal	Chest	11_015	2	Yes	10NOV16	10NOV2016	11	Entered	62	Male	10NOV16	245	MF4637	<250 mg/day	No	No	>=250 mg/day	No	Yes	Yes	Yes	Yes
Visit 2			Normal	Heart	11_015	2	Yes	10NOV16	10NOV2016	11	Entered	62	Male	10NOV16	245	MF4637	<250 mg/day	No	No	>=250 mg/day	No	Yes	Yes	Yes	Yes
Visit 2			Normal	Abdomen	11_015	2	Yes	10NOV16	10NOV2016	11	Entered	62	Male	10NOV16	245	MF4637	<250 mg/day	No	No	>=250 mg/day	No	Yes	Yes	Yes	Yes
Visit 2			Normal	Dermatologic	11_015	2	Yes	10NOV16	10NOV2016	11	Entered	62	Male	10NOV16	245	MF4637	<250 mg/day	No	No	>=250 mg/day	No	Yes	Yes	Yes	Yes
Visit 2			Normal	Musculoskeletal	11_015	2	Yes	10NOV16	10NOV2016	11	Entered	62	Male	10NOV16	245	MF4637	<250 mg/day	No	No	>=250 mg/day	No	Yes	Yes	Yes	Yes
Visit 2			Normal	Circulatory	11_015	2	Yes	10NOV16	10NOV2016	11	Entered	62	Male	10NOV16	245	MF4637	<250 mg/day	No	No	>=250 mg/day	No	Yes	Yes	Yes	Yes
Visit 2			Normal	Neurologic	11_015	2	Yes	10NOV16	10NOV2016	11	Entered	62	Male	10NOV16	245	MF4637	<250 mg/day	No	No	>=250 mg/day	No	Yes	Yes	Yes	Yes
Visit 2			Normal	Lymphatic	11_015	2	Yes	10NOV16	10NOV2016	11	Entered	62	Male	10NOV16	245	MF4637	<250 mg/day	No	No	>=250 mg/day	No	Yes	Yes	Yes	Yes
Visit 2			Normal	Respiratory	11_015	2	Yes	10NOV16	10NOV2016	11	Entered	62	Male	10NOV16	245	MF4637	<250 mg/day	No	No	>=250 mg/day	No	Yes	Yes	Yes	Yes
Visit 2			Not done	Other, specify	11_015	2	Yes	10NOV16	10NOV2016	11	Entered	62	Male	10NOV16	245	MF4637	<250 mg/day	No	No	>=250 mg/day	No	Yes	Yes	Yes	Yes
Visit 2			Normal	General appearance	11_017	2	Yes	28NOV16	28NOV2016	11	Entered	32	Female	28NOV16	246	MF4637	<250 mg/day	No	No	<250 mg/day	No	Yes	Yes	Yes	Yes
Visit 2			Normal	Head, eyes, ears and nose	11_017	2	Yes	28NOV16	28NOV2016	11	Entered	32	Female	28NOV16	246	MF4637	<250 mg/day	No	No	<250 mg/day	No	Yes	Yes	Yes	Yes
Visit 2			Normal	Mouth, teeth and throat	11_017	2	Yes	28NOV16	28NOV2016	11	Entered	32	Female	28NOV16	246	MF4637	<250 mg/day	No	No	<250 mg/day	No	Yes	Yes	Yes	Yes
Visit 2			Normal	Neck and thyroid	11_017	2	Yes	28NOV16	28NOV2016	11	Entered	32	Female	28NOV16	246	MF4637	<250 mg/day	No	No	<250 mg/day	No	Yes	Yes	Yes	Yes
Visit 2			Normal	Chest	11_017	2	Yes	28NOV16	28NOV2016	11	Entered	32	Female	28NOV16	246	MF4637	<250 mg/day	No	No	<250 mg/day	No	Yes	Yes	Yes	Yes
Visit 2			Normal	Heart	11_017	2	Yes	28NOV16	28NOV2016	11	Entered	32	Female	28NOV16	246	MF4637	<250 mg/day	No	No	<250 mg/day	No	Yes	Yes	Yes	Yes
Visit 2			Normal	Abdomen	11_017	2	Yes	28NOV16	28NOV2016	11	Entered	32	Female	28NOV16	246	MF4637	<250 mg/day	No	No	<250 mg/day	No	Yes	Yes	Yes	Yes
Visit 2			Normal	Dermatologic	11_017	2	Yes	28NOV16	28NOV2016	11	Entered	32	Female	28NOV16	246	MF4637	<250 mg/day	No	No	<250 mg/day	No	Yes	Yes	Yes	Yes
Visit 2			Normal	Musculoskeletal	11_017	2	Yes	28NOV16	28NOV2016	11	Entered	32	Female	28NOV16	246	MF4637	<250 mg/day	No	No	<250 mg/day	No	Yes	Yes	Yes	Yes
Visit 2			Normal	Circulatory	11_017	2	Yes	28NOV16	28NOV2016	11	Entered	32	Female	28NOV16	246	MF4637	<250 mg/day	No	No	<250 mg/day	No	Yes	Yes	Yes	Yes
Visit 2			Normal	Neurologic	11_017	2	Yes	28NOV16	28NOV2016	11	Entered	32	Female	28NOV16	246	MF4637	<250 mg/day	No	No	<250 mg/day	No	Yes	Yes	Yes	Yes
Visit 2			Normal	Lymphatic	11_017	2	Yes	28NOV16	28NOV2016	11	Entered	32	Female	28NOV16	246	MF4637	<250 mg/day	No	No	<250 mg/day	No	Yes	Yes	Yes	Yes
Visit 2			Normal	Respiratory	11_017	2	Yes	28NOV16	28NOV2016	11	Entered	32	Female	28NOV16	246	MF4637	<250 mg/day	No	No	<250 mg/day	No	Yes	Yes	Yes	Yes
Visit 2			Not done	Other, specify	11_017	2	Yes	28NOV16	28NOV2016	11	Entered	32	Female	28NOV16	246	MF4637	<250 mg/day	No	No	<250 mg/day	No	Yes	Yes	Yes	Yes
Visit 2			Normal	General appearance	11_018	2	Yes	28NOV16	28NOV2016	11	Entered	45	Female	29NOV16	248	Placebo	<250 mg/day	No	No	>=250 mg/day	No	Yes	Yes	Yes	Yes
Visit 2			Normal	Head, eyes, ears and nose	11_018	2	Yes	28NOV16	28NOV2016	11	Entered	45	Female	29NOV16	248	Placebo	<250 mg/day	No	No	>=250 mg/day	No	Yes	Yes	Yes	Yes
Visit 2			Normal	Mouth, teeth and throat	11_018	2	Yes	28NOV16	28NOV2016	11	Entered	45	Female	29NOV16	248	Placebo	<250 mg/day	No	No	>=250 mg/day	No	Yes	Yes	Yes	Yes
Visit 2			Normal	Neck and thyroid	11_018	2	Yes	28NOV16	28NOV2016	11	Entered	45	Female	29NOV16	248	Placebo	<250 mg/day	No	No	>=250 mg/day	No	Yes	Yes	Yes	Yes
Visit 2			Normal	Chest	11_018	2	Yes	28NOV16	28NOV2016	11	Entered	45	Female	29NOV16	248	Placebo	<250 mg/day	No	No	>=250 mg/day	No	Yes	Yes	Yes	Yes
Visit 2			Normal	Heart	11_018	2	Yes	28NOV16	28NOV2016	11	Entered	45	Female	29NOV16	248	Placebo	<250 mg/day	No	No	>=250 mg/day	No	Yes	Yes	Yes	Yes
Visit 2			Normal	Abdomen	11_018	2	Yes	28NOV16	28NOV2016	11	Entered	45	Female	29NOV16	248	Placebo	<250 mg/day	No	No	>=250 mg/day	No	Yes	Yes	Yes	Yes
Visit 2			Normal	Dermatologic	11_018	2	Yes	28NOV16	28NOV2016	11	Entered	45	Female	29NOV16	248	Placebo	<250 mg/day	No	No	>=250 mg/day	No	Yes	Yes	Yes	Yes
Visit 2			Normal	Musculoskeletal	11_018	2	Yes	28NOV16	28NOV2016	11	Entered	45	Female	29NOV16	248	Placebo	<250 mg/day	No	No	>=250 mg/day	No	Yes	Yes	Yes	Yes
Visit 2			Normal	Circulatory	11_018	2	Yes	28NOV16	28NOV2016	11	Entered	45	Female	29NOV16	248	Placebo	<250 mg/day	No	No	>=250 mg/day	No	Yes	Yes	Yes	Yes
Visit 2			Normal	Neurologic	11_018	2	Yes	28NOV16	28NOV2016	11	Entered	45	Female	29NOV16	248	Placebo	<250 mg/day	No	No	>=250 mg/day	No	Yes	Yes	Yes	Yes
Visit 2			Normal	Lymphatic	11_018	2	Yes	28NOV16	28NOV2016	11	Entered	45	Female	29NOV16	248	Placebo	<250 mg/day	No	No	>=250 mg/day	No	Yes	Yes	Yes	Yes
Visit 2			Normal	Respiratory	11_018	2	Yes	28NOV16	28NOV2016	11	Entered	45	Female	29NOV16	248	Placebo	<250 mg/day	No	No	>=250 mg/day	No	Yes	Yes	Yes	Yes
Visit 2			Not done	Other, specify	11_018	2	Yes	28NOV16	28NOV2016	11	Entered	45	Female	29NOV16	248	Placebo	<250 mg/day	No	No	>=250 mg/day	No	Yes	Yes	Yes	Yes
Visit 2		OBESITY NCS	Abnormal	General appearance	12_001	2	Yes	14OCT16	14OCT2016	12	Entered	66	Male	14OCT16	257	MF4637	>=250 mg/day	Yes	Yes	>=250 mg/day	No	Yes	Yes	Yes	Yes
Visit 2			Normal	Head, eyes, ears and nose	12_001	2	Yes	14OCT16	14OCT2016	12	Entered	66	Male	14OCT16	257	MF4637	>=250 mg/day	Yes	Yes	>=250 mg/day	No	Yes	Yes	Yes	Yes
Visit 2			Normal	Mouth, teeth and throat	12_001	2	Yes	14OCT16	14OCT2016	12	Entered	66	Male	14OCT16	257	MF4637	>=250 mg/day	Yes	Yes	>=250 mg/day	No	Yes	Yes	Yes	Yes
Visit 2			Normal	Neck and thyroid	12_001	2	Yes	14OCT16	14OCT2016	12	Entered	66	Male	14OCT16	257	MF4637	>=250 mg/day	Yes	Yes	>=250 mg/day	No	Yes	Yes	Yes	Yes
Visit 2			Normal	Chest	12_001	2	Yes	14OCT16	14OCT2016	12	Entered	66	Male	14OCT16	257	MF4637	>=250 mg/day	Yes	Yes	>=250 mg/day	No	Yes	Yes	Yes	Yes
Visit 2			Normal	Heart	12_001	2	Yes	14OCT16	14OCT2016	12	Entered	66	Male	14OCT16	257	MF4637	>=250 mg/day	Yes	Yes	>=250 mg/day	No	Yes	Yes	Yes	Yes
Visit 2			Normal	Abdomen	12_001	2	Yes	14OCT16	14OCT2016	12	Entered	66	Male	14OCT16	257	MF4637	>=250 mg/day	Yes	Yes	>=250 mg/day	No	Yes	Yes	Yes	Yes
Visit 2		RIGHT KIDNEY STONES SURGERY SCARS	Abnormal	Dermatologic	12_001	2	Yes	14OCT16	14OCT2016	12	Entered	66	Male	14OCT16	257	MF4637	>=250 mg/day	Yes	Yes	>=250 mg/day	No	Yes	Yes	Yes	Yes
Visit 2			Normal	Musculoskeletal	12_001	2	Yes	14OCT16	14OCT2016	12	Entered	66	Male	14OCT16	257	MF4637	>=250 mg/day	Yes	Yes	>=250 mg/day	No	Yes	Yes	Yes	Yes
Visit 2			Normal	Circulatory	12_001	2	Yes	14OCT16	14OCT2016	12	Entered	66	Male	14OCT16	257	MF4637	>=250 mg/day	Yes	Yes	>=250 mg/day	No	Yes	Yes	Yes	Yes
Visit 2		LEFT HEMIPLEGIA NCS	Abnormal	Neurologic	12_001	2	Yes	14OCT16	14OCT2016	12	Entered	66	Male	14OCT16	257	MF4637	>=250 mg/day	Yes	Yes	>=250 mg/day	No	Yes	Yes	Yes	Yes
Visit 2			Normal	Lymphatic	12_001	2	Yes	14OCT16	14OCT2016	12	Entered	66	Male	14OCT16	257	MF4637	>=250 mg/day	Yes	Yes	>=250 mg/day	No	Yes	Yes	Yes	Yes
Visit 2			Normal	Respiratory	12_001	2	Yes	14OCT16	14OCT2016	12	Entered	66	Male	14OCT16	257	MF4637	>=250 mg/day	Yes	Yes	>=250 mg/day	No	Yes	Yes	Yes	Yes
Visit 2			Not done	Other, specify	12_001	2	Yes	14OCT16	14OCT2016	12	Entered	66	Male	14OCT16	257	MF4637	>=250 mg/day	Yes	Yes	>=250 mg/day	No	Yes	Yes	Yes	Yes
Visit 2		OVERWEIGHT NCS	Abnormal	General appearance	12_003	2	Yes	11OCT16	11OCT2016	12	Entered	52	Male	11OCT16	138	Placebo	>=250 mg/day	Yes	No	>=250 mg/day	No	Yes	Yes	Yes	Yes
Visit 2			Normal	Head, eyes, ears and nose	12_003	2	Yes	11OCT16	11OCT2016	12	Entered	52	Male	11OCT16	138	Placebo	>=250 mg/day	Yes	No	>=250 mg/day	No	Yes	Yes	Yes	Yes
Visit 2			Normal	Mouth, teeth and throat	12_003	2	Yes	11OCT16	11OCT2016	12	Entered	52	Male	11OCT16	138	Placebo	>=250 mg/day	Yes	No	>=250 mg/day	No	Yes	Yes	Yes	Yes
Visit 2			Normal	Neck and thyroid	12_003	2	Yes	11OCT16	11OCT2016	12	Entered	52	Male	11OCT16	138	Placebo	>=250 mg/day	Yes	No	>=250 mg/day	No	Yes	Yes	Yes	Yes
Visit 2			Normal	Chest	12_003	2	Yes	11OCT16	11OCT2016	12	Entered	52	Male	11OCT16	138	Placebo	>=250 mg/day	Yes	No	>=250 mg/day	No	Yes	Yes	Yes	Yes
Visit 2			Normal	Heart	12_003	2	Yes	11OCT16	11OCT2016	12	Entered	52	Male	11OCT16	138	Placebo	>=250 mg/day	Yes	No	>=250 mg/day	No	Yes	Yes	Yes	Yes
Visit 2			Normal	Abdomen	12_003	2	Yes	11OCT16	11OCT2016	12	Entered	52	Male	11OCT16	138	Placebo	>=250 mg/day	Yes	No	>=250 mg/day	No	Yes	Yes	Yes	Yes
Visit 2			Normal	Dermatologic	12_003	2	Yes	11OCT16	11OCT2016	12	Entered	52	Male	11OCT16	138	Placebo	>=250 mg/day	Yes	No	>=250 mg/day	No	Yes	Yes	Yes	Yes
Visit 2			Normal	Musculoskeletal	12_003	2	Yes	11OCT16	11OCT2016	12	Entered	52	Male	11OCT16	138	Placebo	>=250 mg/day	Yes	No	>=250 mg/day	No	Yes	Yes	Yes	Yes
Visit 2			Normal	Circulatory	12_003	2	Yes	11OCT16	11OCT2016	12	Entered	52	Male	11OCT16	138	Placebo	>=250 mg/day	Yes	No	>=250 mg/day	No	Yes	Yes	Yes	Yes
Visit 2			Normal	Neurologic	12_003	2	Yes	11OCT16	11OCT2016	12	Entered	52	Male	11OCT16	138	Placebo	>=250 mg/day	Yes	No	>=250 mg/day	No	Yes	Yes	Yes	Yes
Visit 2			Normal	Lymphatic	12_003	2	Yes	11OCT16	11OCT2016	12	Entered	52	Male	11OCT16	138	Placebo	>=250 mg/day	Yes	No	>=250 mg/day	No	Yes	Yes	Yes	Yes
Visit 2			Normal	Respiratory	12_003	2	Yes	11OCT16	11OCT2016	12	Entered	52	Male	11OCT16	138	Placebo	>=250 mg/day	Yes	No	>=250 mg/day	No	Yes	Yes	Yes	Yes
Visit 2			Not done	Other, specify	12_003	2	Yes	11OCT16	11OCT2016	12	Entered	52	Male	11OCT16	138	Placebo	>=250 mg/day	Yes	No	>=250 mg/day	No	Yes	Yes	Yes	Yes
Visit 2		OBESITY NCS	Abnormal	General appearance	12_004	2	Yes	22SEP16	22SEP2016	12	Entered	70	Male	22SEP16	133	Placebo	>=250 mg/day	Yes	Yes	>=250 mg/day	No	Yes	Yes	Yes	Yes
Visit 2			Normal	Head, eyes, ears and nose	12_004	2	Yes	22SEP16	22SEP2016	12	Entered	70	Male	22SEP16	133	Placebo	>=250 mg/day	Yes	Yes	>=250 mg/day	No	Yes	Yes	Yes	Yes
Visit 2			Normal	Mouth, teeth and throat	12_004	2	Yes	22SEP16	22SEP2016	12	Entered	70	Male	22SEP16	133	Placebo	>=250 mg/day	Yes	Yes	>=250 mg/day	No	Yes	Yes	Yes	Yes
Visit 2			Normal	Neck and thyroid	12_004	2	Yes	22SEP16	22SEP2016	12	Entered	70	Male	22SEP16	133	Placebo	>=250 mg/day	Yes	Yes	>=250 mg/day	No	Yes	Yes	Yes	Yes
Visit 2			Normal	Chest	12_004	2	Yes	22SEP16	22SEP2016	12	Entered	70	Male	22SEP16	133	Placebo	>=250 mg/day	Yes	Yes	>=250 mg/day	No	Yes	Yes	Yes	Yes
Visit 2			Normal	Heart	12_004	2	Yes	22SEP16	22SEP2016	12	Entered	70	Male	22SEP16	133	Placebo	>=250 mg/day	Yes	Yes	>=250 mg/day	No	Yes	Yes	Yes	Yes
Visit 2			Normal	Abdomen	12_004	2	Yes	22SEP16	22SEP2016	12	Entered	70	Male	22SEP16	133	Placebo	>=250 mg/day	Yes	Yes	>=250 mg/day	No	Yes	Yes	Yes	Yes
Visit 2			Normal	Dermatologic	12_004	2	Yes	22SEP16	22SEP2016	12	Entered	70	Male	22SEP16	133	Placebo	>=250 mg/day	Yes	Yes	>=250 mg/day	No	Yes	Yes	Yes	Yes
Visit 2			Normal	Musculoskeletal	12_004	2	Yes	22SEP16	22SEP2016	12	Entered	70	Male	22SEP16	133	Placebo	>=250 mg/day	Yes	Yes	>=250 mg/day	No	Yes	Yes	Yes	Yes
Visit 2			Normal	Circulatory	12_004	2	Yes	22SEP16	22SEP2016	12	Entered	70	Male	22SEP16	133	Placebo	>=250 mg/day	Yes	Yes	>=250 mg/day	No	Yes	Yes	Yes	Yes
Visit 2			Normal	Neurologic	12_004	2	Yes	22SEP16	22SEP2016	12	Entered	70	Male	22SEP16	133	Placebo	>=250 mg/day	Yes	Yes	>=250 mg/day	No	Yes	Yes	Yes	Yes
Visit 2			Normal	Lymphatic	12_004	2	Yes	22SEP16	22SEP2016	12	Entered	70	Male	22SEP16	133	Placebo	>=250 mg/day	Yes	Yes	>=250 mg/day	No	Yes	Yes	Yes	Yes
Visit 2			Normal	Respiratory	12_004	2	Yes	22SEP16	22SEP2016	12	Entered	70	Male	22SEP16	133	Placebo	>=250 mg/day	Yes	Yes	>=250 mg/day	No	Yes	Yes	Yes	Yes
Visit 2			Not done	Other, specify	12_004	2	Yes	22SEP16	22SEP2016	12	Entered	70	Male	22SEP16	133	Placebo	>=250 mg/day	Yes	Yes	>=250 mg/day	No	Yes	Yes	Yes	Yes
Visit 2		obesity	Abnormal	General appearance	12_006	2	Yes	22SEP16	22SEP2016	12	Entered	76	Female	22SEP16	132	MF4637	<250 mg/day	Yes	Yes	<250 mg/day	No	Yes	Yes	Yes	Yes
Visit 2			Normal	Head, eyes, ears and nose	12_006	2	Yes	22SEP16	22SEP2016	12	Entered	76	Female	22SEP16	132	MF4637	<250 mg/day	Yes	Yes	<250 mg/day	No	Yes	Yes	Yes	Yes
Visit 2			Normal	Mouth, teeth and throat	12_006	2	Yes	22SEP16	22SEP2016	12	Entered	76	Female	22SEP16	132	MF4637	<250 mg/day	Yes	Yes	<250 mg/day	No	Yes	Yes	Yes	Yes
Visit 2			Normal	Neck and thyroid	12_006	2	Yes	22SEP16	22SEP2016	12	Entered	76	Female	22SEP16	132	MF4637	<250 mg/day	Yes	Yes	<250 mg/day	No	Yes	Yes	Yes	Yes
Visit 2			Normal	Chest	12_006	2	Yes	22SEP16	22SEP2016	12	Entered	76	Female	22SEP16	132	MF4637	<250 mg/day	Yes	Yes	<250 mg/day	No	Yes	Yes	Yes	Yes
Visit 2			Normal	Heart	12_006	2	Yes	22SEP16	22SEP2016	12	Entered	76	Female	22SEP16	132	MF4637	<250 mg/day	Yes	Yes	<250 mg/day	No	Yes	Yes	Yes	Yes
Visit 2		scar from laparoscopic cholecystectomy, c-section scar NCS	Abnormal	Abdomen	12_006	2	Yes	22SEP16	22SEP2016	12	Entered	76	Female	22SEP16	132	MF4637	<250 mg/day	Yes	Yes	<250 mg/day	No	Yes	Yes	Yes	Yes
Visit 2			Normal	Dermatologic	12_006	2	Yes	22SEP16	22SEP2016	12	Entered	76	Female	22SEP16	132	MF4637	<250 mg/day	Yes	Yes	<250 mg/day	No	Yes	Yes	Yes	Yes
Visit 2			Normal	Musculoskeletal	12_006	2	Yes	22SEP16	22SEP2016	12	Entered	76	Female	22SEP16	132	MF4637	<250 mg/day	Yes	Yes	<250 mg/day	No	Yes	Yes	Yes	Yes
Visit 2			Normal	Circulatory	12_006	2	Yes	22SEP16	22SEP2016	12	Entered	76	Female	22SEP16	132	MF4637	<250 mg/day	Yes	Yes	<250 mg/day	No	Yes	Yes	Yes	Yes
Visit 2			Normal	Neurologic	12_006	2	Yes	22SEP16	22SEP2016	12	Entered	76	Female	22SEP16	132	MF4637	<250 mg/day	Yes	Yes	<250 mg/day	No	Yes	Yes	Yes	Yes
Visit 2			Normal	Lymphatic	12_006	2	Yes	22SEP16	22SEP2016	12	Entered	76	Female	22SEP16	132	MF4637	<250 mg/day	Yes	Yes	<250 mg/day	No	Yes	Yes	Yes	Yes
Visit 2			Normal	Respiratory	12_006	2	Yes	22SEP16	22SEP2016	12	Entered	76	Female	22SEP16	132	MF4637	<250 mg/day	Yes	Yes	<250 mg/day	No	Yes	Yes	Yes	Yes
Visit 2			Not done	Other, specify	12_006	2	Yes	22SEP16	22SEP2016	12	Entered	76	Female	22SEP16	132	MF4637	<250 mg/day	Yes	Yes	<250 mg/day	No	Yes	Yes	Yes	Yes
Visit 2		OBESITY NCS	Abnormal	General appearance	12_007	2	Yes	30SEP16	30SEP2016	12	Entered	64	Female	30SEP16	134	Placebo	>=250 mg/day	No	Yes	>=250 mg/day	No	Yes	Yes	Yes	Yes
Visit 2		SEBACEOUS CYST REMOVAL SUTURES	Abnormal	Head, eyes, ears and nose	12_007	2	Yes	30SEP16	30SEP2016	12	Entered	64	Female	30SEP16	134	Placebo	>=250 mg/day	No	Yes	>=250 mg/day	No	Yes	Yes	Yes	Yes
Visit 2				Mouth, teeth and throat	12_007	2	Yes	30SEP16	30SEP2016	12	Entered	64	Female	30SEP16	134	Placebo	>=250 mg/day	No	Yes	>=250 mg/day	No	Yes	Yes	Yes	Yes
Visit 2				Neck and thyroid	12_007	2	Yes	30SEP16	30SEP2016	12	Entered	64	Female	30SEP16	134	Placebo	>=250 mg/day	No	Yes	>=250 mg/day	No	Yes	Yes	Yes	Yes
Visit 2				Chest	12_007	2	Yes	30SEP16	30SEP2016	12	Entered	64	Female	30SEP16	134	Placebo	>=250 mg/day	No	Yes	>=250 mg/day	No	Yes	Yes	Yes	Yes
Visit 2				Heart	12_007	2	Yes	30SEP16	30SEP2016	12	Entered	64	Female	30SEP16	134	Placebo	>=250 mg/day	No	Yes	>=250 mg/day	No	Yes	Yes	Yes	Yes
Visit 2		APPENDECTOMY	Abnormal	Abdomen	12_007	2	Yes	30SEP16	30SEP2016	12	Entered	64	Female	30SEP16	134	Placebo	>=250 mg/day	No	Yes	>=250 mg/day	No	Yes	Yes	Yes	Yes
Visit 2				Dermatologic	12_007	2	Yes	30SEP16	30SEP2016	12	Entered	64	Female	30SEP16	134	Placebo	>=250 mg/day	No	Yes	>=250 mg/day	No	Yes	Yes	Yes	Yes
Visit 2		BILATERAL CARPAL TUNNEL SURGERY	Abnormal	Musculoskeletal	12_007	2	Yes	30SEP16	30SEP2016	12	Entered	64	Female	30SEP16	134	Placebo	>=250 mg/day	No	Yes	>=250 mg/day	No	Yes	Yes	Yes	Yes
Visit 2				Circulatory	12_007	2	Yes	30SEP16	30SEP2016	12	Entered	64	Female	30SEP16	134	Placebo	>=250 mg/day	No	Yes	>=250 mg/day	No	Yes	Yes	Yes	Yes
Visit 2				Neurologic	12_007	2	Yes	30SEP16	30SEP2016	12	Entered	64	Female	30SEP16	134	Placebo	>=250 mg/day	No	Yes	>=250 mg/day	No	Yes	Yes	Yes	Yes
Visit 2				Lymphatic	12_007	2	Yes	30SEP16	30SEP2016	12	Entered	64	Female	30SEP16	134	Placebo	>=250 mg/day	No	Yes	>=250 mg/day	No	Yes	Yes	Yes	Yes
Visit 2				Respiratory	12_007	2	Yes	30SEP16	30SEP2016	12	Entered	64	Female	30SEP16	134	Placebo	>=250 mg/day	No	Yes	>=250 mg/day	No	Yes	Yes	Yes	Yes
Visit 2		LEFT BREAST LUMPECTOMY NCS	Abnormal	Other, specify	12_007	2	Yes	30SEP16	30SEP2016	12	Entered	64	Female	30SEP16	134	Placebo	>=250 mg/day	No	Yes	>=250 mg/day	No	Yes	Yes	Yes	Yes
Visit 2		OBESITY NCS	Abnormal	General appearance	12_009	2	Yes	26OCT16	26OCT2016	12	Early Termination	53	Female	26OCT16	260	MF4637	>=250 mg/day	Yes	Yes	>=250 mg/day	No	Yes	Yes	Yes	Yes
Visit 2			Normal	Head, eyes, ears and nose	12_009	2	Yes	26OCT16	26OCT2016	12	Early Termination	53	Female	26OCT16	260	MF4637	>=250 mg/day	Yes	Yes	>=250 mg/day	No	Yes	Yes	Yes	Yes
Visit 2			Normal	Mouth, teeth and throat	12_009	2	Yes	26OCT16	26OCT2016	12	Early Termination	53	Female	26OCT16	260	MF4637	>=250 mg/day	Yes	Yes	>=250 mg/day	No	Yes	Yes	Yes	Yes
Visit 2			Normal	Neck and thyroid	12_009	2	Yes	26OCT16	26OCT2016	12	Early Termination	53	Female	26OCT16	260	MF4637	>=250 mg/day	Yes	Yes	>=250 mg/day	No	Yes	Yes	Yes	Yes
Visit 2			Normal	Chest	12_009	2	Yes	26OCT16	26OCT2016	12	Early Termination	53	Female	26OCT16	260	MF4637	>=250 mg/day	Yes	Yes	>=250 mg/day	No	Yes	Yes	Yes	Yes
Visit 2			Normal	Heart	12_009	2	Yes	26OCT16	26OCT2016	12	Early Termination	53	Female	26OCT16	260	MF4637	>=250 mg/day	Yes	Yes	>=250 mg/day	No	Yes	Yes	Yes	Yes
Visit 2		CHOLECYSTECTOMY NCS	Abnormal	Abdomen	12_009	2	Yes	26OCT16	26OCT2016	12	Early Termination	53	Female	26OCT16	260	MF4637	>=250 mg/day	Yes	Yes	>=250 mg/day	No	Yes	Yes	Yes	Yes
Visit 2			Normal	Dermatologic	12_009	2	Yes	26OCT16	26OCT2016	12	Early Termination	53	Female	26OCT16	260	MF4637	>=250 mg/day	Yes	Yes	>=250 mg/day	No	Yes	Yes	Yes	Yes
Visit 2			Normal	Musculoskeletal	12_009	2	Yes	26OCT16	26OCT2016	12	Early Termination	53	Female	26OCT16	260	MF4637	>=250 mg/day	Yes	Yes	>=250 mg/day	No	Yes	Yes	Yes	Yes
Visit 2			Normal	Circulatory	12_009	2	Yes	26OCT16	26OCT2016	12	Early Termination	53	Female	26OCT16	260	MF4637	>=250 mg/day	Yes	Yes	>=250 mg/day	No	Yes	Yes	Yes	Yes
Visit 2			Normal	Neurologic	12_009	2	Yes	26OCT16	26OCT2016	12	Early Termination	53	Female	26OCT16	260	MF4637	>=250 mg/day	Yes	Yes	>=250 mg/day	No	Yes	Yes	Yes	Yes
Visit 2			Normal	Lymphatic	12_009	2	Yes	26OCT16	26OCT2016	12	Early Termination	53	Female	26OCT16	260	MF4637	>=250 mg/day	Yes	Yes	>=250 mg/day	No	Yes	Yes	Yes	Yes
Visit 2			Normal	Respiratory	12_009	2	Yes	26OCT16	26OCT2016	12	Early Termination	53	Female	26OCT16	260	MF4637	>=250 mg/day	Yes	Yes	>=250 mg/day	No	Yes	Yes	Yes	Yes
Visit 2			Not done	Other, specify	12_009	2	Yes	26OCT16	26OCT2016	12	Early Termination	53	Female	26OCT16	260	MF4637	>=250 mg/day	Yes	Yes	>=250 mg/day	No	Yes	Yes	Yes	Yes
Visit 2		OBESITY NCS	Abnormal	General appearance	12_013	2	Yes	30SEP16	30SEP2016	12	Entered	52	Female	30SEP16	137	MF4637	>=250 mg/day	No	Yes	>=250 mg/day	No	Yes	Yes	Yes	Yes
Visit 2			Normal	Head, eyes, ears and nose	12_013	2	Yes	30SEP16	30SEP2016	12	Entered	52	Female	30SEP16	137	MF4637	>=250 mg/day	No	Yes	>=250 mg/day	No	Yes	Yes	Yes	Yes
Visit 2			Normal	Mouth, teeth and throat	12_013	2	Yes	30SEP16	30SEP2016	12	Entered	52	Female	30SEP16	137	MF4637	>=250 mg/day	No	Yes	>=250 mg/day	No	Yes	Yes	Yes	Yes
Visit 2			Normal	Neck and thyroid	12_013	2	Yes	30SEP16	30SEP2016	12	Entered	52	Female	30SEP16	137	MF4637	>=250 mg/day	No	Yes	>=250 mg/day	No	Yes	Yes	Yes	Yes
Visit 2			Normal	Chest	12_013	2	Yes	30SEP16	30SEP2016	12	Entered	52	Female	30SEP16	137	MF4637	>=250 mg/day	No	Yes	>=250 mg/day	No	Yes	Yes	Yes	Yes
Visit 2			Normal	Heart	12_013	2	Yes	30SEP16	30SEP2016	12	Entered	52	Female	30SEP16	137	MF4637	>=250 mg/day	No	Yes	>=250 mg/day	No	Yes	Yes	Yes	Yes
Visit 2			Normal	Abdomen	12_013	2	Yes	30SEP16	30SEP2016	12	Entered	52	Female	30SEP16	137	MF4637	>=250 mg/day	No	Yes	>=250 mg/day	No	Yes	Yes	Yes	Yes
Visit 2			Normal	Dermatologic	12_013	2	Yes	30SEP16	30SEP2016	12	Entered	52	Female	30SEP16	137	MF4637	>=250 mg/day	No	Yes	>=250 mg/day	No	Yes	Yes	Yes	Yes
Visit 2			Normal	Musculoskeletal	12_013	2	Yes	30SEP16	30SEP2016	12	Entered	52	Female	30SEP16	137	MF4637	>=250 mg/day	No	Yes	>=250 mg/day	No	Yes	Yes	Yes	Yes
Visit 2			Normal	Circulatory	12_013	2	Yes	30SEP16	30SEP2016	12	Entered	52	Female	30SEP16	137	MF4637	>=250 mg/day	No	Yes	>=250 mg/day	No	Yes	Yes	Yes	Yes
Visit 2			Normal	Neurologic	12_013	2	Yes	30SEP16	30SEP2016	12	Entered	52	Female	30SEP16	137	MF4637	>=250 mg/day	No	Yes	>=250 mg/day	No	Yes	Yes	Yes	Yes
Visit 2			Normal	Lymphatic	12_013	2	Yes	30SEP16	30SEP2016	12	Entered	52	Female	30SEP16	137	MF4637	>=250 mg/day	No	Yes	>=250 mg/day	No	Yes	Yes	Yes	Yes
Visit 2			Normal	Respiratory	12_013	2	Yes	30SEP16	30SEP2016	12	Entered	52	Female	30SEP16	137	MF4637	>=250 mg/day	No	Yes	>=250 mg/day	No	Yes	Yes	Yes	Yes
Visit 2			Not done	Other, specify	12_013	2	Yes	30SEP16	30SEP2016	12	Entered	52	Female	30SEP16	137	MF4637	>=250 mg/day	No	Yes	>=250 mg/day	No	Yes	Yes	Yes	Yes
Visit 2		OVERWEIGHT NCS	Abnormal	General appearance	12_014	2	Yes	30SEP16	30SEP2016	12	Entered	66	Female	30SEP16	136	Placebo	>=250 mg/day	Yes	Yes	>=250 mg/day	No	Yes	Yes	Yes	Yes
Visit 2			Normal	Head, eyes, ears and nose	12_014	2	Yes	30SEP16	30SEP2016	12	Entered	66	Female	30SEP16	136	Placebo	>=250 mg/day	Yes	Yes	>=250 mg/day	No	Yes	Yes	Yes	Yes
Visit 2			Normal	Mouth, teeth and throat	12_014	2	Yes	30SEP16	30SEP2016	12	Entered	66	Female	30SEP16	136	Placebo	>=250 mg/day	Yes	Yes	>=250 mg/day	No	Yes	Yes	Yes	Yes
Visit 2			Normal	Neck and thyroid	12_014	2	Yes	30SEP16	30SEP2016	12	Entered	66	Female	30SEP16	136	Placebo	>=250 mg/day	Yes	Yes	>=250 mg/day	No	Yes	Yes	Yes	Yes
Visit 2			Normal	Chest	12_014	2	Yes	30SEP16	30SEP2016	12	Entered	66	Female	30SEP16	136	Placebo	>=250 mg/day	Yes	Yes	>=250 mg/day	No	Yes	Yes	Yes	Yes
Visit 2			Normal	Heart	12_014	2	Yes	30SEP16	30SEP2016	12	Entered	66	Female	30SEP16	136	Placebo	>=250 mg/day	Yes	Yes	>=250 mg/day	No	Yes	Yes	Yes	Yes
Visit 2		C-SECTION NCS	Abnormal	Abdomen	12_014	2	Yes	30SEP16	30SEP2016	12	Entered	66	Female	30SEP16	136	Placebo	>=250 mg/day	Yes	Yes	>=250 mg/day	No	Yes	Yes	Yes	Yes
Visit 2			Normal	Dermatologic	12_014	2	Yes	30SEP16	30SEP2016	12	Entered	66	Female	30SEP16	136	Placebo	>=250 mg/day	Yes	Yes	>=250 mg/day	No	Yes	Yes	Yes	Yes
Visit 2			Normal	Musculoskeletal	12_014	2	Yes	30SEP16	30SEP2016	12	Entered	66	Female	30SEP16	136	Placebo	>=250 mg/day	Yes	Yes	>=250 mg/day	No	Yes	Yes	Yes	Yes
Visit 2			Normal	Circulatory	12_014	2	Yes	30SEP16	30SEP2016	12	Entered	66	Female	30SEP16	136	Placebo	>=250 mg/day	Yes	Yes	>=250 mg/day	No	Yes	Yes	Yes	Yes
Visit 2			Normal	Neurologic	12_014	2	Yes	30SEP16	30SEP2016	12	Entered	66	Female	30SEP16	136	Placebo	>=250 mg/day	Yes	Yes	>=250 mg/day	No	Yes	Yes	Yes	Yes
Visit 2			Normal	Lymphatic	12_014	2	Yes	30SEP16	30SEP2016	12	Entered	66	Female	30SEP16	136	Placebo	>=250 mg/day	Yes	Yes	>=250 mg/day	No	Yes	Yes	Yes	Yes
Visit 2			Normal	Respiratory	12_014	2	Yes	30SEP16	30SEP2016	12	Entered	66	Female	30SEP16	136	Placebo	>=250 mg/day	Yes	Yes	>=250 mg/day	No	Yes	Yes	Yes	Yes
Visit 2			Not done	Other, specify	12_014	2	Yes	30SEP16	30SEP2016	12	Entered	66	Female	30SEP16	136	Placebo	>=250 mg/day	Yes	Yes	>=250 mg/day	No	Yes	Yes	Yes	Yes
Visit 2		OVERWEIGHT NCS	Abnormal	General appearance	12_015	2	Yes	30SEP16	30SEP2016	12	Early Termination	47	Female	30SEP16	135	MF4637	>=250 mg/day	Yes	Yes	>=250 mg/day	No	Yes	Yes	Yes	Yes
Visit 2			Normal	Head, eyes, ears and nose	12_015	2	Yes	30SEP16	30SEP2016	12	Early Termination	47	Female	30SEP16	135	MF4637	>=250 mg/day	Yes	Yes	>=250 mg/day	No	Yes	Yes	Yes	Yes
Visit 2			Normal	Mouth, teeth and throat	12_015	2	Yes	30SEP16	30SEP2016	12	Early Termination	47	Female	30SEP16	135	MF4637	>=250 mg/day	Yes	Yes	>=250 mg/day	No	Yes	Yes	Yes	Yes
Visit 2			Normal	Neck and thyroid	12_015	2	Yes	30SEP16	30SEP2016	12	Early Termination	47	Female	30SEP16	135	MF4637	>=250 mg/day	Yes	Yes	>=250 mg/day	No	Yes	Yes	Yes	Yes
Visit 2			Normal	Chest	12_015	2	Yes	30SEP16	30SEP2016	12	Early Termination	47	Female	30SEP16	135	MF4637	>=250 mg/day	Yes	Yes	>=250 mg/day	No	Yes	Yes	Yes	Yes
Visit 2			Normal	Heart	12_015	2	Yes	30SEP16	30SEP2016	12	Early Termination	47	Female	30SEP16	135	MF4637	>=250 mg/day	Yes	Yes	>=250 mg/day	No	Yes	Yes	Yes	Yes
Visit 2		CESAREAN SECTION SCAR	Abnormal	Abdomen	12_015	2	Yes	30SEP16	30SEP2016	12	Early Termination	47	Female	30SEP16	135	MF4637	>=250 mg/day	Yes	Yes	>=250 mg/day	No	Yes	Yes	Yes	Yes
Visit 2			Normal	Dermatologic	12_015	2	Yes	30SEP16	30SEP2016	12	Early Termination	47	Female	30SEP16	135	MF4637	>=250 mg/day	Yes	Yes	>=250 mg/day	No	Yes	Yes	Yes	Yes
Visit 2			Normal	Musculoskeletal	12_015	2	Yes	30SEP16	30SEP2016	12	Early Termination	47	Female	30SEP16	135	MF4637	>=250 mg/day	Yes	Yes	>=250 mg/day	No	Yes	Yes	Yes	Yes
Visit 2			Normal	Circulatory	12_015	2	Yes	30SEP16	30SEP2016	12	Early Termination	47	Female	30SEP16	135	MF4637	>=250 mg/day	Yes	Yes	>=250 mg/day	No	Yes	Yes	Yes	Yes
Visit 2			Normal	Neurologic	12_015	2	Yes	30SEP16	30SEP2016	12	Early Termination	47	Female	30SEP16	135	MF4637	>=250 mg/day	Yes	Yes	>=250 mg/day	No	Yes	Yes	Yes	Yes
Visit 2			Normal	Lymphatic	12_015	2	Yes	30SEP16	30SEP2016	12	Early Termination	47	Female	30SEP16	135	MF4637	>=250 mg/day	Yes	Yes	>=250 mg/day	No	Yes	Yes	Yes	Yes
Visit 2			Normal	Respiratory	12_015	2	Yes	30SEP16	30SEP2016	12	Early Termination	47	Female	30SEP16	135	MF4637	>=250 mg/day	Yes	Yes	>=250 mg/day	No	Yes	Yes	Yes	Yes
Visit 2			Not done	Other, specify	12_015	2	Yes	30SEP16	30SEP2016	12	Early Termination	47	Female	30SEP16	135	MF4637	>=250 mg/day	Yes	Yes	>=250 mg/day	No	Yes	Yes	Yes	Yes
Visit 2		OVERWEIGHT NCS	Abnormal	General appearance	12_016	2	Yes	05OCT16	05OCT2016	12	Entered	52	Female	05OCT16	103	MF4637	<250 mg/day	No	No	<250 mg/day	No	Yes	Yes	Yes	Yes
Visit 2			Normal	Head, eyes, ears and nose	12_016	2	Yes	05OCT16	05OCT2016	12	Entered	52	Female	05OCT16	103	MF4637	<250 mg/day	No	No	<250 mg/day	No	Yes	Yes	Yes	Yes
Visit 2			Normal	Mouth, teeth and throat	12_016	2	Yes	05OCT16	05OCT2016	12	Entered	52	Female	05OCT16	103	MF4637	<250 mg/day	No	No	<250 mg/day	No	Yes	Yes	Yes	Yes
Visit 2			Normal	Neck and thyroid	12_016	2	Yes	05OCT16	05OCT2016	12	Entered	52	Female	05OCT16	103	MF4637	<250 mg/day	No	No	<250 mg/day	No	Yes	Yes	Yes	Yes
Visit 2			Normal	Chest	12_016	2	Yes	05OCT16	05OCT2016	12	Entered	52	Female	05OCT16	103	MF4637	<250 mg/day	No	No	<250 mg/day	No	Yes	Yes	Yes	Yes
Visit 2			Normal	Heart	12_016	2	Yes	05OCT16	05OCT2016	12	Entered	52	Female	05OCT16	103	MF4637	<250 mg/day	No	No	<250 mg/day	No	Yes	Yes	Yes	Yes
Visit 2		TOTAL HYSTERECTOMY, SPLENECTOMY, CHOLECYSTECTOMY NCS	Abnormal	Abdomen	12_016	2	Yes	05OCT16	05OCT2016	12	Entered	52	Female	05OCT16	103	MF4637	<250 mg/day	No	No	<250 mg/day	No	Yes	Yes	Yes	Yes
Visit 2		BILATERAL SHOULDER TATTOO NCS	Abnormal	Dermatologic	12_016	2	Yes	05OCT16	05OCT2016	12	Entered	52	Female	05OCT16	103	MF4637	<250 mg/day	No	No	<250 mg/day	No	Yes	Yes	Yes	Yes
Visit 2			Normal	Musculoskeletal	12_016	2	Yes	05OCT16	05OCT2016	12	Entered	52	Female	05OCT16	103	MF4637	<250 mg/day	No	No	<250 mg/day	No	Yes	Yes	Yes	Yes
Visit 2			Normal	Circulatory	12_016	2	Yes	05OCT16	05OCT2016	12	Entered	52	Female	05OCT16	103	MF4637	<250 mg/day	No	No	<250 mg/day	No	Yes	Yes	Yes	Yes
Visit 2			Normal	Neurologic	12_016	2	Yes	05OCT16	05OCT2016	12	Entered	52	Female	05OCT16	103	MF4637	<250 mg/day	No	No	<250 mg/day	No	Yes	Yes	Yes	Yes
Visit 2			Normal	Lymphatic	12_016	2	Yes	05OCT16	05OCT2016	12	Entered	52	Female	05OCT16	103	MF4637	<250 mg/day	No	No	<250 mg/day	No	Yes	Yes	Yes	Yes
Visit 2			Normal	Respiratory	12_016	2	Yes	05OCT16	05OCT2016	12	Entered	52	Female	05OCT16	103	MF4637	<250 mg/day	No	No	<250 mg/day	No	Yes	Yes	Yes	Yes
Visit 2			Not done	Other, specify	12_016	2	Yes	05OCT16	05OCT2016	12	Entered	52	Female	05OCT16	103	MF4637	<250 mg/day	No	No	<250 mg/day	No	Yes	Yes	Yes	Yes
Visit 2		OBESE NCS	Abnormal	General appearance	12_017	2	Yes	05OCT16	05OCT2016	12	Entered	57	Female	05OCT16	100	Placebo	>=250 mg/day	Yes	Yes	>=250 mg/day	No	Yes	Yes	Yes	Yes
Visit 2			Normal	Head, eyes, ears and nose	12_017	2	Yes	05OCT16	05OCT2016	12	Entered	57	Female	05OCT16	100	Placebo	>=250 mg/day	Yes	Yes	>=250 mg/day	No	Yes	Yes	Yes	Yes
Visit 2			Normal	Mouth, teeth and throat	12_017	2	Yes	05OCT16	05OCT2016	12	Entered	57	Female	05OCT16	100	Placebo	>=250 mg/day	Yes	Yes	>=250 mg/day	No	Yes	Yes	Yes	Yes
Visit 2			Normal	Neck and thyroid	12_017	2	Yes	05OCT16	05OCT2016	12	Entered	57	Female	05OCT16	100	Placebo	>=250 mg/day	Yes	Yes	>=250 mg/day	No	Yes	Yes	Yes	Yes
Visit 2			Normal	Chest	12_017	2	Yes	05OCT16	05OCT2016	12	Entered	57	Female	05OCT16	100	Placebo	>=250 mg/day	Yes	Yes	>=250 mg/day	No	Yes	Yes	Yes	Yes
Visit 2			Normal	Heart	12_017	2	Yes	05OCT16	05OCT2016	12	Entered	57	Female	05OCT16	100	Placebo	>=250 mg/day	Yes	Yes	>=250 mg/day	No	Yes	Yes	Yes	Yes
Visit 2			Normal	Abdomen	12_017	2	Yes	05OCT16	05OCT2016	12	Entered	57	Female	05OCT16	100	Placebo	>=250 mg/day	Yes	Yes	>=250 mg/day	No	Yes	Yes	Yes	Yes
Visit 2			Normal	Dermatologic	12_017	2	Yes	05OCT16	05OCT2016	12	Entered	57	Female	05OCT16	100	Placebo	>=250 mg/day	Yes	Yes	>=250 mg/day	No	Yes	Yes	Yes	Yes
Visit 2			Normal	Musculoskeletal	12_017	2	Yes	05OCT16	05OCT2016	12	Entered	57	Female	05OCT16	100	Placebo	>=250 mg/day	Yes	Yes	>=250 mg/day	No	Yes	Yes	Yes	Yes
Visit 2			Normal	Circulatory	12_017	2	Yes	05OCT16	05OCT2016	12	Entered	57	Female	05OCT16	100	Placebo	>=250 mg/day	Yes	Yes	>=250 mg/day	No	Yes	Yes	Yes	Yes
Visit 2			Normal	Neurologic	12_017	2	Yes	05OCT16	05OCT2016	12	Entered	57	Female	05OCT16	100	Placebo	>=250 mg/day	Yes	Yes	>=250 mg/day	No	Yes	Yes	Yes	Yes
Visit 2			Normal	Lymphatic	12_017	2	Yes	05OCT16	05OCT2016	12	Entered	57	Female	05OCT16	100	Placebo	>=250 mg/day	Yes	Yes	>=250 mg/day	No	Yes	Yes	Yes	Yes
Visit 2			Normal	Respiratory	12_017	2	Yes	05OCT16	05OCT2016	12	Entered	57	Female	05OCT16	100	Placebo	>=250 mg/day	Yes	Yes	>=250 mg/day	No	Yes	Yes	Yes	Yes
Visit 2			Not done	Other, specify	12_017	2	Yes	05OCT16	05OCT2016	12	Entered	57	Female	05OCT16	100	Placebo	>=250 mg/day	Yes	Yes	>=250 mg/day	No	Yes	Yes	Yes	Yes
Visit 2		OBESITY NCS	Abnormal	General appearance	12_019	2	Yes	05OCT16	05OCT2016	12	Entered	53	Male	05OCT16	102	Placebo	<250 mg/day	Yes	Yes	<250 mg/day	No	Yes	Yes	Yes	Yes
Visit 2			Normal	Head, eyes, ears and nose	12_019	2	Yes	05OCT16	05OCT2016	12	Entered	53	Male	05OCT16	102	Placebo	<250 mg/day	Yes	Yes	<250 mg/day	No	Yes	Yes	Yes	Yes
Visit 2			Normal	Mouth, teeth and throat	12_019	2	Yes	05OCT16	05OCT2016	12	Entered	53	Male	05OCT16	102	Placebo	<250 mg/day	Yes	Yes	<250 mg/day	No	Yes	Yes	Yes	Yes
Visit 2			Normal	Neck and thyroid	12_019	2	Yes	05OCT16	05OCT2016	12	Entered	53	Male	05OCT16	102	Placebo	<250 mg/day	Yes	Yes	<250 mg/day	No	Yes	Yes	Yes	Yes
Visit 2			Normal	Chest	12_019	2	Yes	05OCT16	05OCT2016	12	Entered	53	Male	05OCT16	102	Placebo	<250 mg/day	Yes	Yes	<250 mg/day	No	Yes	Yes	Yes	Yes
Visit 2			Normal	Heart	12_019	2	Yes	05OCT16	05OCT2016	12	Entered	53	Male	05OCT16	102	Placebo	<250 mg/day	Yes	Yes	<250 mg/day	No	Yes	Yes	Yes	Yes
Visit 2			Normal	Abdomen	12_019	2	Yes	05OCT16	05OCT2016	12	Entered	53	Male	05OCT16	102	Placebo	<250 mg/day	Yes	Yes	<250 mg/day	No	Yes	Yes	Yes	Yes
Visit 2		LEFT ARM TATTOO NCS	Abnormal	Dermatologic	12_019	2	Yes	05OCT16	05OCT2016	12	Entered	53	Male	05OCT16	102	Placebo	<250 mg/day	Yes	Yes	<250 mg/day	No	Yes	Yes	Yes	Yes
Visit 2			Normal	Musculoskeletal	12_019	2	Yes	05OCT16	05OCT2016	12	Entered	53	Male	05OCT16	102	Placebo	<250 mg/day	Yes	Yes	<250 mg/day	No	Yes	Yes	Yes	Yes
Visit 2			Normal	Circulatory	12_019	2	Yes	05OCT16	05OCT2016	12	Entered	53	Male	05OCT16	102	Placebo	<250 mg/day	Yes	Yes	<250 mg/day	No	Yes	Yes	Yes	Yes
Visit 2		RIGHT HEMIPLEGIA	Abnormal	Neurologic	12_019	2	Yes	05OCT16	05OCT2016	12	Entered	53	Male	05OCT16	102	Placebo	<250 mg/day	Yes	Yes	<250 mg/day	No	Yes	Yes	Yes	Yes
Visit 2			Normal	Lymphatic	12_019	2	Yes	05OCT16	05OCT2016	12	Entered	53	Male	05OCT16	102	Placebo	<250 mg/day	Yes	Yes	<250 mg/day	No	Yes	Yes	Yes	Yes
Visit 2			Normal	Respiratory	12_019	2	Yes	05OCT16	05OCT2016	12	Entered	53	Male	05OCT16	102	Placebo	<250 mg/day	Yes	Yes	<250 mg/day	No	Yes	Yes	Yes	Yes
Visit 2		RIGHT CRYPTORCHID SURGERY SCAR NCS	Abnormal	Other, specify	12_019	2	Yes	05OCT16	05OCT2016	12	Entered	53	Male	05OCT16	102	Placebo	<250 mg/day	Yes	Yes	<250 mg/day	No	Yes	Yes	Yes	Yes
Visit 2		OVERWEIGHT NCS	Abnormal	General appearance	12_020	2	Yes	05OCT16	05OCT2016	12	Entered	60	Female	05OCT16	101	MF4637	>=250 mg/day	Yes	Yes	>=250 mg/day	No	Yes	Yes	Yes	Yes
Visit 2			Normal	Head, eyes, ears and nose	12_020	2	Yes	05OCT16	05OCT2016	12	Entered	60	Female	05OCT16	101	MF4637	>=250 mg/day	Yes	Yes	>=250 mg/day	No	Yes	Yes	Yes	Yes
Visit 2			Normal	Mouth, teeth and throat	12_020	2	Yes	05OCT16	05OCT2016	12	Entered	60	Female	05OCT16	101	MF4637	>=250 mg/day	Yes	Yes	>=250 mg/day	No	Yes	Yes	Yes	Yes
Visit 2			Normal	Neck and thyroid	12_020	2	Yes	05OCT16	05OCT2016	12	Entered	60	Female	05OCT16	101	MF4637	>=250 mg/day	Yes	Yes	>=250 mg/day	No	Yes	Yes	Yes	Yes
Visit 2			Normal	Chest	12_020	2	Yes	05OCT16	05OCT2016	12	Entered	60	Female	05OCT16	101	MF4637	>=250 mg/day	Yes	Yes	>=250 mg/day	No	Yes	Yes	Yes	Yes
Visit 2			Normal	Heart	12_020	2	Yes	05OCT16	05OCT2016	12	Entered	60	Female	05OCT16	101	MF4637	>=250 mg/day	Yes	Yes	>=250 mg/day	No	Yes	Yes	Yes	Yes
Visit 2		LEFT OVARIAN CYST OOPHORECTOMY SCAR NCS	Abnormal	Abdomen	12_020	2	Yes	05OCT16	05OCT2016	12	Entered	60	Female	05OCT16	101	MF4637	>=250 mg/day	Yes	Yes	>=250 mg/day	No	Yes	Yes	Yes	Yes
Visit 2		LEFT BREAST BENIGN CYST REMOVAL SCAR NCS	Abnormal	Dermatologic	12_020	2	Yes	05OCT16	05OCT2016	12	Entered	60	Female	05OCT16	101	MF4637	>=250 mg/day	Yes	Yes	>=250 mg/day	No	Yes	Yes	Yes	Yes
Visit 2			Normal	Musculoskeletal	12_020	2	Yes	05OCT16	05OCT2016	12	Entered	60	Female	05OCT16	101	MF4637	>=250 mg/day	Yes	Yes	>=250 mg/day	No	Yes	Yes	Yes	Yes
Visit 2			Normal	Circulatory	12_020	2	Yes	05OCT16	05OCT2016	12	Entered	60	Female	05OCT16	101	MF4637	>=250 mg/day	Yes	Yes	>=250 mg/day	No	Yes	Yes	Yes	Yes
Visit 2			Normal	Neurologic	12_020	2	Yes	05OCT16	05OCT2016	12	Entered	60	Female	05OCT16	101	MF4637	>=250 mg/day	Yes	Yes	>=250 mg/day	No	Yes	Yes	Yes	Yes
Visit 2			Normal	Lymphatic	12_020	2	Yes	05OCT16	05OCT2016	12	Entered	60	Female	05OCT16	101	MF4637	>=250 mg/day	Yes	Yes	>=250 mg/day	No	Yes	Yes	Yes	Yes
Visit 2			Normal	Respiratory	12_020	2	Yes	05OCT16	05OCT2016	12	Entered	60	Female	05OCT16	101	MF4637	>=250 mg/day	Yes	Yes	>=250 mg/day	No	Yes	Yes	Yes	Yes
Visit 2			Not done	Other, specify	12_020	2	Yes	05OCT16	05OCT2016	12	Entered	60	Female	05OCT16	101	MF4637	>=250 mg/day	Yes	Yes	>=250 mg/day	No	Yes	Yes	Yes	Yes
Visit 2		OBESITY NCS	Abnormal	General appearance	12_021	2	Yes	11OCT16	11OCT2016	12	Entered	54	Male	11OCT16	254	MF4637	>=250 mg/day	Yes	Yes	>=250 mg/day	No	Yes	Yes	Yes	Yes
Visit 2			Normal	Head, eyes, ears and nose	12_021	2	Yes	11OCT16	11OCT2016	12	Entered	54	Male	11OCT16	254	MF4637	>=250 mg/day	Yes	Yes	>=250 mg/day	No	Yes	Yes	Yes	Yes
Visit 2			Normal	Mouth, teeth and throat	12_021	2	Yes	11OCT16	11OCT2016	12	Entered	54	Male	11OCT16	254	MF4637	>=250 mg/day	Yes	Yes	>=250 mg/day	No	Yes	Yes	Yes	Yes
Visit 2			Normal	Neck and thyroid	12_021	2	Yes	11OCT16	11OCT2016	12	Entered	54	Male	11OCT16	254	MF4637	>=250 mg/day	Yes	Yes	>=250 mg/day	No	Yes	Yes	Yes	Yes
Visit 2			Normal	Chest	12_021	2	Yes	11OCT16	11OCT2016	12	Entered	54	Male	11OCT16	254	MF4637	>=250 mg/day	Yes	Yes	>=250 mg/day	No	Yes	Yes	Yes	Yes
Visit 2			Normal	Heart	12_021	2	Yes	11OCT16	11OCT2016	12	Entered	54	Male	11OCT16	254	MF4637	>=250 mg/day	Yes	Yes	>=250 mg/day	No	Yes	Yes	Yes	Yes
Visit 2			Normal	Abdomen	12_021	2	Yes	11OCT16	11OCT2016	12	Entered	54	Male	11OCT16	254	MF4637	>=250 mg/day	Yes	Yes	>=250 mg/day	No	Yes	Yes	Yes	Yes
Visit 2			Normal	Dermatologic	12_021	2	Yes	11OCT16	11OCT2016	12	Entered	54	Male	11OCT16	254	MF4637	>=250 mg/day	Yes	Yes	>=250 mg/day	No	Yes	Yes	Yes	Yes
Visit 2			Normal	Musculoskeletal	12_021	2	Yes	11OCT16	11OCT2016	12	Entered	54	Male	11OCT16	254	MF4637	>=250 mg/day	Yes	Yes	>=250 mg/day	No	Yes	Yes	Yes	Yes
Visit 2			Normal	Circulatory	12_021	2	Yes	11OCT16	11OCT2016	12	Entered	54	Male	11OCT16	254	MF4637	>=250 mg/day	Yes	Yes	>=250 mg/day	No	Yes	Yes	Yes	Yes
Visit 2			Normal	Neurologic	12_021	2	Yes	11OCT16	11OCT2016	12	Entered	54	Male	11OCT16	254	MF4637	>=250 mg/day	Yes	Yes	>=250 mg/day	No	Yes	Yes	Yes	Yes
Visit 2			Normal	Lymphatic	12_021	2	Yes	11OCT16	11OCT2016	12	Entered	54	Male	11OCT16	254	MF4637	>=250 mg/day	Yes	Yes	>=250 mg/day	No	Yes	Yes	Yes	Yes
Visit 2			Normal	Respiratory	12_021	2	Yes	11OCT16	11OCT2016	12	Entered	54	Male	11OCT16	254	MF4637	>=250 mg/day	Yes	Yes	>=250 mg/day	No	Yes	Yes	Yes	Yes
Visit 2			Not done	Other, specify	12_021	2	Yes	11OCT16	11OCT2016	12	Entered	54	Male	11OCT16	254	MF4637	>=250 mg/day	Yes	Yes	>=250 mg/day	No	Yes	Yes	Yes	Yes
Visit 2		OBESITY NCS	Abnormal	General appearance	12_022	2	Yes	12OCT16	12OCT2016	12	Entered	43	Male	12OCT16	253	Placebo	<250 mg/day	Yes	No	<250 mg/day	No	Yes	Yes	Yes	Yes
Visit 2			Normal	Head, eyes, ears and nose	12_022	2	Yes	12OCT16	12OCT2016	12	Entered	43	Male	12OCT16	253	Placebo	<250 mg/day	Yes	No	<250 mg/day	No	Yes	Yes	Yes	Yes
Visit 2			Normal	Mouth, teeth and throat	12_022	2	Yes	12OCT16	12OCT2016	12	Entered	43	Male	12OCT16	253	Placebo	<250 mg/day	Yes	No	<250 mg/day	No	Yes	Yes	Yes	Yes
Visit 2			Normal	Neck and thyroid	12_022	2	Yes	12OCT16	12OCT2016	12	Entered	43	Male	12OCT16	253	Placebo	<250 mg/day	Yes	No	<250 mg/day	No	Yes	Yes	Yes	Yes
Visit 2			Normal	Chest	12_022	2	Yes	12OCT16	12OCT2016	12	Entered	43	Male	12OCT16	253	Placebo	<250 mg/day	Yes	No	<250 mg/day	No	Yes	Yes	Yes	Yes
Visit 2			Normal	Heart	12_022	2	Yes	12OCT16	12OCT2016	12	Entered	43	Male	12OCT16	253	Placebo	<250 mg/day	Yes	No	<250 mg/day	No	Yes	Yes	Yes	Yes
Visit 2			Normal	Abdomen	12_022	2	Yes	12OCT16	12OCT2016	12	Entered	43	Male	12OCT16	253	Placebo	<250 mg/day	Yes	No	<250 mg/day	No	Yes	Yes	Yes	Yes
Visit 2		ACANTHOSIS NIGRICANS BACK AND NECK NCS	Abnormal	Dermatologic	12_022	2	Yes	12OCT16	12OCT2016	12	Entered	43	Male	12OCT16	253	Placebo	<250 mg/day	Yes	No	<250 mg/day	No	Yes	Yes	Yes	Yes
Visit 2			Normal	Musculoskeletal	12_022	2	Yes	12OCT16	12OCT2016	12	Entered	43	Male	12OCT16	253	Placebo	<250 mg/day	Yes	No	<250 mg/day	No	Yes	Yes	Yes	Yes
Visit 2			Normal	Circulatory	12_022	2	Yes	12OCT16	12OCT2016	12	Entered	43	Male	12OCT16	253	Placebo	<250 mg/day	Yes	No	<250 mg/day	No	Yes	Yes	Yes	Yes
Visit 2			Normal	Neurologic	12_022	2	Yes	12OCT16	12OCT2016	12	Entered	43	Male	12OCT16	253	Placebo	<250 mg/day	Yes	No	<250 mg/day	No	Yes	Yes	Yes	Yes
Visit 2			Normal	Lymphatic	12_022	2	Yes	12OCT16	12OCT2016	12	Entered	43	Male	12OCT16	253	Placebo	<250 mg/day	Yes	No	<250 mg/day	No	Yes	Yes	Yes	Yes
Visit 2			Normal	Respiratory	12_022	2	Yes	12OCT16	12OCT2016	12	Entered	43	Male	12OCT16	253	Placebo	<250 mg/day	Yes	No	<250 mg/day	No	Yes	Yes	Yes	Yes
Visit 2			Not done	Other, specify	12_022	2	Yes	12OCT16	12OCT2016	12	Entered	43	Male	12OCT16	253	Placebo	<250 mg/day	Yes	No	<250 mg/day	No	Yes	Yes	Yes	Yes
Visit 2		OBESITY NCS	Abnormal	General appearance	12_024	2	Yes	11OCT16	11OCT2016	12	Early Termination	41	Female	11OCT16	139	MF4637	>=250 mg/day	Yes	No	>=250 mg/day	No	Yes	Yes	Yes	Yes
Visit 2			Normal	Head, eyes, ears and nose	12_024	2	Yes	11OCT16	11OCT2016	12	Early Termination	41	Female	11OCT16	139	MF4637	>=250 mg/day	Yes	No	>=250 mg/day	No	Yes	Yes	Yes	Yes
Visit 2			Normal	Mouth, teeth and throat	12_024	2	Yes	11OCT16	11OCT2016	12	Early Termination	41	Female	11OCT16	139	MF4637	>=250 mg/day	Yes	No	>=250 mg/day	No	Yes	Yes	Yes	Yes
Visit 2			Normal	Neck and thyroid	12_024	2	Yes	11OCT16	11OCT2016	12	Early Termination	41	Female	11OCT16	139	MF4637	>=250 mg/day	Yes	No	>=250 mg/day	No	Yes	Yes	Yes	Yes
Visit 2			Normal	Chest	12_024	2	Yes	11OCT16	11OCT2016	12	Early Termination	41	Female	11OCT16	139	MF4637	>=250 mg/day	Yes	No	>=250 mg/day	No	Yes	Yes	Yes	Yes
Visit 2			Normal	Heart	12_024	2	Yes	11OCT16	11OCT2016	12	Early Termination	41	Female	11OCT16	139	MF4637	>=250 mg/day	Yes	No	>=250 mg/day	No	Yes	Yes	Yes	Yes
Visit 2		SCAR ON SUPRA UMBILICAL REGION NCS	Abnormal	Abdomen	12_024	2	Yes	11OCT16	11OCT2016	12	Early Termination	41	Female	11OCT16	139	MF4637	>=250 mg/day	Yes	No	>=250 mg/day	No	Yes	Yes	Yes	Yes
Visit 2		SCAR ON RIGHT CLAVICLE REGION	Abnormal	Dermatologic	12_024	2	Yes	11OCT16	11OCT2016	12	Early Termination	41	Female	11OCT16	139	MF4637	>=250 mg/day	Yes	No	>=250 mg/day	No	Yes	Yes	Yes	Yes
Visit 2			Normal	Musculoskeletal	12_024	2	Yes	11OCT16	11OCT2016	12	Early Termination	41	Female	11OCT16	139	MF4637	>=250 mg/day	Yes	No	>=250 mg/day	No	Yes	Yes	Yes	Yes
Visit 2			Normal	Circulatory	12_024	2	Yes	11OCT16	11OCT2016	12	Early Termination	41	Female	11OCT16	139	MF4637	>=250 mg/day	Yes	No	>=250 mg/day	No	Yes	Yes	Yes	Yes
Visit 2			Normal	Neurologic	12_024	2	Yes	11OCT16	11OCT2016	12	Early Termination	41	Female	11OCT16	139	MF4637	>=250 mg/day	Yes	No	>=250 mg/day	No	Yes	Yes	Yes	Yes
Visit 2			Normal	Lymphatic	12_024	2	Yes	11OCT16	11OCT2016	12	Early Termination	41	Female	11OCT16	139	MF4637	>=250 mg/day	Yes	No	>=250 mg/day	No	Yes	Yes	Yes	Yes
Visit 2			Normal	Respiratory	12_024	2	Yes	11OCT16	11OCT2016	12	Early Termination	41	Female	11OCT16	139	MF4637	>=250 mg/day	Yes	No	>=250 mg/day	No	Yes	Yes	Yes	Yes
Visit 2			Not done	Other, specify	12_024	2	Yes	11OCT16	11OCT2016	12	Early Termination	41	Female	11OCT16	139	MF4637	>=250 mg/day	Yes	No	>=250 mg/day	No	Yes	Yes	Yes	Yes
Visit 2		OBESITY NCS	Abnormal	General appearance	12_025	2	Yes	14OCT16	14OCT2016	12	Entered	73	Male	14OCT16	258	MF4637	>=250 mg/day	Yes	No	>=250 mg/day	No	Yes	Yes	Yes	Yes
Visit 2			Normal	Head, eyes, ears and nose	12_025	2	Yes	14OCT16	14OCT2016	12	Entered	73	Male	14OCT16	258	MF4637	>=250 mg/day	Yes	No	>=250 mg/day	No	Yes	Yes	Yes	Yes
Visit 2			Normal	Mouth, teeth and throat	12_025	2	Yes	14OCT16	14OCT2016	12	Entered	73	Male	14OCT16	258	MF4637	>=250 mg/day	Yes	No	>=250 mg/day	No	Yes	Yes	Yes	Yes
Visit 2			Normal	Neck and thyroid	12_025	2	Yes	14OCT16	14OCT2016	12	Entered	73	Male	14OCT16	258	MF4637	>=250 mg/day	Yes	No	>=250 mg/day	No	Yes	Yes	Yes	Yes
Visit 2			Normal	Chest	12_025	2	Yes	14OCT16	14OCT2016	12	Entered	73	Male	14OCT16	258	MF4637	>=250 mg/day	Yes	No	>=250 mg/day	No	Yes	Yes	Yes	Yes
Visit 2			Normal	Heart	12_025	2	Yes	14OCT16	14OCT2016	12	Entered	73	Male	14OCT16	258	MF4637	>=250 mg/day	Yes	No	>=250 mg/day	No	Yes	Yes	Yes	Yes
Visit 2			Normal	Abdomen	12_025	2	Yes	14OCT16	14OCT2016	12	Entered	73	Male	14OCT16	258	MF4637	>=250 mg/day	Yes	No	>=250 mg/day	No	Yes	Yes	Yes	Yes
Visit 2			Normal	Dermatologic	12_025	2	Yes	14OCT16	14OCT2016	12	Entered	73	Male	14OCT16	258	MF4637	>=250 mg/day	Yes	No	>=250 mg/day	No	Yes	Yes	Yes	Yes
Visit 2			Normal	Musculoskeletal	12_025	2	Yes	14OCT16	14OCT2016	12	Entered	73	Male	14OCT16	258	MF4637	>=250 mg/day	Yes	No	>=250 mg/day	No	Yes	Yes	Yes	Yes
Visit 2			Normal	Circulatory	12_025	2	Yes	14OCT16	14OCT2016	12	Entered	73	Male	14OCT16	258	MF4637	>=250 mg/day	Yes	No	>=250 mg/day	No	Yes	Yes	Yes	Yes
Visit 2			Normal	Neurologic	12_025	2	Yes	14OCT16	14OCT2016	12	Entered	73	Male	14OCT16	258	MF4637	>=250 mg/day	Yes	No	>=250 mg/day	No	Yes	Yes	Yes	Yes
Visit 2			Normal	Lymphatic	12_025	2	Yes	14OCT16	14OCT2016	12	Entered	73	Male	14OCT16	258	MF4637	>=250 mg/day	Yes	No	>=250 mg/day	No	Yes	Yes	Yes	Yes
Visit 2			Normal	Respiratory	12_025	2	Yes	14OCT16	14OCT2016	12	Entered	73	Male	14OCT16	258	MF4637	>=250 mg/day	Yes	No	>=250 mg/day	No	Yes	Yes	Yes	Yes
Visit 2		PENILE IMPLANT NCS	Abnormal	Other, specify	12_025	2	Yes	14OCT16	14OCT2016	12	Entered	73	Male	14OCT16	258	MF4637	>=250 mg/day	Yes	No	>=250 mg/day	No	Yes	Yes	Yes	Yes
Visit 2		OBESITY NCS	Abnormal	General appearance	12_027	2	Yes	12OCT16	12OCT2016	12	Entered	56	Female	12OCT16	252	Placebo	<250 mg/day	No	Yes	<250 mg/day	No	Yes	Yes	Yes	Yes
Visit 2			Normal	Head, eyes, ears and nose	12_027	2	Yes	12OCT16	12OCT2016	12	Entered	56	Female	12OCT16	252	Placebo	<250 mg/day	No	Yes	<250 mg/day	No	Yes	Yes	Yes	Yes
Visit 2			Normal	Mouth, teeth and throat	12_027	2	Yes	12OCT16	12OCT2016	12	Entered	56	Female	12OCT16	252	Placebo	<250 mg/day	No	Yes	<250 mg/day	No	Yes	Yes	Yes	Yes
Visit 2			Normal	Neck and thyroid	12_027	2	Yes	12OCT16	12OCT2016	12	Entered	56	Female	12OCT16	252	Placebo	<250 mg/day	No	Yes	<250 mg/day	No	Yes	Yes	Yes	Yes
Visit 2			Normal	Chest	12_027	2	Yes	12OCT16	12OCT2016	12	Entered	56	Female	12OCT16	252	Placebo	<250 mg/day	No	Yes	<250 mg/day	No	Yes	Yes	Yes	Yes
Visit 2			Normal	Heart	12_027	2	Yes	12OCT16	12OCT2016	12	Entered	56	Female	12OCT16	252	Placebo	<250 mg/day	No	Yes	<250 mg/day	No	Yes	Yes	Yes	Yes
Visit 2			Normal	Abdomen	12_027	2	Yes	12OCT16	12OCT2016	12	Entered	56	Female	12OCT16	252	Placebo	<250 mg/day	No	Yes	<250 mg/day	No	Yes	Yes	Yes	Yes
Visit 2		CESAREAN SECTION SCAR	Abnormal	Dermatologic	12_027	2	Yes	12OCT16	12OCT2016	12	Entered	56	Female	12OCT16	252	Placebo	<250 mg/day	No	Yes	<250 mg/day	No	Yes	Yes	Yes	Yes
Visit 2			Normal	Musculoskeletal	12_027	2	Yes	12OCT16	12OCT2016	12	Entered	56	Female	12OCT16	252	Placebo	<250 mg/day	No	Yes	<250 mg/day	No	Yes	Yes	Yes	Yes
Visit 2			Normal	Circulatory	12_027	2	Yes	12OCT16	12OCT2016	12	Entered	56	Female	12OCT16	252	Placebo	<250 mg/day	No	Yes	<250 mg/day	No	Yes	Yes	Yes	Yes
Visit 2			Normal	Neurologic	12_027	2	Yes	12OCT16	12OCT2016	12	Entered	56	Female	12OCT16	252	Placebo	<250 mg/day	No	Yes	<250 mg/day	No	Yes	Yes	Yes	Yes
Visit 2			Normal	Lymphatic	12_027	2	Yes	12OCT16	12OCT2016	12	Entered	56	Female	12OCT16	252	Placebo	<250 mg/day	No	Yes	<250 mg/day	No	Yes	Yes	Yes	Yes
Visit 2			Normal	Respiratory	12_027	2	Yes	12OCT16	12OCT2016	12	Entered	56	Female	12OCT16	252	Placebo	<250 mg/day	No	Yes	<250 mg/day	No	Yes	Yes	Yes	Yes
Visit 2			Not done	Other, specify	12_027	2	Yes	12OCT16	12OCT2016	12	Entered	56	Female	12OCT16	252	Placebo	<250 mg/day	No	Yes	<250 mg/day	No	Yes	Yes	Yes	Yes
Visit 2		OVERWEIGHT NCS	Abnormal	General appearance	12_028	2	Yes	14OCT16	14OCT2016	12	Entered	71	Female	14OCT16	259	Placebo	<250 mg/day	Yes	Yes	<250 mg/day	No	Yes	Yes	Yes	Yes
Visit 2			Normal	Head, eyes, ears and nose	12_028	2	Yes	14OCT16	14OCT2016	12	Entered	71	Female	14OCT16	259	Placebo	<250 mg/day	Yes	Yes	<250 mg/day	No	Yes	Yes	Yes	Yes
Visit 2			Normal	Mouth, teeth and throat	12_028	2	Yes	14OCT16	14OCT2016	12	Entered	71	Female	14OCT16	259	Placebo	<250 mg/day	Yes	Yes	<250 mg/day	No	Yes	Yes	Yes	Yes
Visit 2			Normal	Neck and thyroid	12_028	2	Yes	14OCT16	14OCT2016	12	Entered	71	Female	14OCT16	259	Placebo	<250 mg/day	Yes	Yes	<250 mg/day	No	Yes	Yes	Yes	Yes
Visit 2			Normal	Chest	12_028	2	Yes	14OCT16	14OCT2016	12	Entered	71	Female	14OCT16	259	Placebo	<250 mg/day	Yes	Yes	<250 mg/day	No	Yes	Yes	Yes	Yes
Visit 2			Normal	Heart	12_028	2	Yes	14OCT16	14OCT2016	12	Entered	71	Female	14OCT16	259	Placebo	<250 mg/day	Yes	Yes	<250 mg/day	No	Yes	Yes	Yes	Yes
Visit 2			Normal	Abdomen	12_028	2	Yes	14OCT16	14OCT2016	12	Entered	71	Female	14OCT16	259	Placebo	<250 mg/day	Yes	Yes	<250 mg/day	No	Yes	Yes	Yes	Yes
Visit 2		CESAREAN SECTION SCAR, TUBAL LIGATION NCS	Abnormal	Dermatologic	12_028	2	Yes	14OCT16	14OCT2016	12	Entered	71	Female	14OCT16	259	Placebo	<250 mg/day	Yes	Yes	<250 mg/day	No	Yes	Yes	Yes	Yes
Visit 2			Normal	Musculoskeletal	12_028	2	Yes	14OCT16	14OCT2016	12	Entered	71	Female	14OCT16	259	Placebo	<250 mg/day	Yes	Yes	<250 mg/day	No	Yes	Yes	Yes	Yes
Visit 2			Normal	Circulatory	12_028	2	Yes	14OCT16	14OCT2016	12	Entered	71	Female	14OCT16	259	Placebo	<250 mg/day	Yes	Yes	<250 mg/day	No	Yes	Yes	Yes	Yes
Visit 2			Normal	Neurologic	12_028	2	Yes	14OCT16	14OCT2016	12	Entered	71	Female	14OCT16	259	Placebo	<250 mg/day	Yes	Yes	<250 mg/day	No	Yes	Yes	Yes	Yes
Visit 2			Normal	Lymphatic	12_028	2	Yes	14OCT16	14OCT2016	12	Entered	71	Female	14OCT16	259	Placebo	<250 mg/day	Yes	Yes	<250 mg/day	No	Yes	Yes	Yes	Yes
Visit 2			Normal	Respiratory	12_028	2	Yes	14OCT16	14OCT2016	12	Entered	71	Female	14OCT16	259	Placebo	<250 mg/day	Yes	Yes	<250 mg/day	No	Yes	Yes	Yes	Yes
Visit 2			Not done	Other, specify	12_028	2	Yes	14OCT16	14OCT2016	12	Entered	71	Female	14OCT16	259	Placebo	<250 mg/day	Yes	Yes	<250 mg/day	No	Yes	Yes	Yes	Yes
Visit 2		OVERWEIGHT NCS	Abnormal	General appearance	12_029	2	Yes	12OCT16	12OCT2016	12	Entered	72	Male	12OCT16	256	Placebo	>=250 mg/day	Yes	Yes	>=250 mg/day	No	Yes	Yes	Yes	Yes
Visit 2			Normal	Head, eyes, ears and nose	12_029	2	Yes	12OCT16	12OCT2016	12	Entered	72	Male	12OCT16	256	Placebo	>=250 mg/day	Yes	Yes	>=250 mg/day	No	Yes	Yes	Yes	Yes
Visit 2			Normal	Mouth, teeth and throat	12_029	2	Yes	12OCT16	12OCT2016	12	Entered	72	Male	12OCT16	256	Placebo	>=250 mg/day	Yes	Yes	>=250 mg/day	No	Yes	Yes	Yes	Yes
Visit 2			Normal	Neck and thyroid	12_029	2	Yes	12OCT16	12OCT2016	12	Entered	72	Male	12OCT16	256	Placebo	>=250 mg/day	Yes	Yes	>=250 mg/day	No	Yes	Yes	Yes	Yes
Visit 2			Normal	Chest	12_029	2	Yes	12OCT16	12OCT2016	12	Entered	72	Male	12OCT16	256	Placebo	>=250 mg/day	Yes	Yes	>=250 mg/day	No	Yes	Yes	Yes	Yes
Visit 2			Normal	Heart	12_029	2	Yes	12OCT16	12OCT2016	12	Entered	72	Male	12OCT16	256	Placebo	>=250 mg/day	Yes	Yes	>=250 mg/day	No	Yes	Yes	Yes	Yes
Visit 2			Normal	Abdomen	12_029	2	Yes	12OCT16	12OCT2016	12	Entered	72	Male	12OCT16	256	Placebo	>=250 mg/day	Yes	Yes	>=250 mg/day	No	Yes	Yes	Yes	Yes
Visit 2			Normal	Dermatologic	12_029	2	Yes	12OCT16	12OCT2016	12	Entered	72	Male	12OCT16	256	Placebo	>=250 mg/day	Yes	Yes	>=250 mg/day	No	Yes	Yes	Yes	Yes
Visit 2			Normal	Musculoskeletal	12_029	2	Yes	12OCT16	12OCT2016	12	Entered	72	Male	12OCT16	256	Placebo	>=250 mg/day	Yes	Yes	>=250 mg/day	No	Yes	Yes	Yes	Yes
Visit 2			Normal	Circulatory	12_029	2	Yes	12OCT16	12OCT2016	12	Entered	72	Male	12OCT16	256	Placebo	>=250 mg/day	Yes	Yes	>=250 mg/day	No	Yes	Yes	Yes	Yes
Visit 2			Normal	Neurologic	12_029	2	Yes	12OCT16	12OCT2016	12	Entered	72	Male	12OCT16	256	Placebo	>=250 mg/day	Yes	Yes	>=250 mg/day	No	Yes	Yes	Yes	Yes
Visit 2			Normal	Lymphatic	12_029	2	Yes	12OCT16	12OCT2016	12	Entered	72	Male	12OCT16	256	Placebo	>=250 mg/day	Yes	Yes	>=250 mg/day	No	Yes	Yes	Yes	Yes
Visit 2			Normal	Respiratory	12_029	2	Yes	12OCT16	12OCT2016	12	Entered	72	Male	12OCT16	256	Placebo	>=250 mg/day	Yes	Yes	>=250 mg/day	No	Yes	Yes	Yes	Yes
Visit 2			Not done	Other, specify	12_029	2	Yes	12OCT16	12OCT2016	12	Entered	72	Male	12OCT16	256	Placebo	>=250 mg/day	Yes	Yes	>=250 mg/day	No	Yes	Yes	Yes	Yes
Visit 2		OBESITY NCS	Abnormal	General appearance	12_030	2	Yes	12OCT16	12OCT2016	12	Entered	56	Male	12OCT16	255	MF4637	<250 mg/day	Yes	Yes	<250 mg/day	No	Yes	Yes	Yes	Yes
Visit 2			Normal	Head, eyes, ears and nose	12_030	2	Yes	12OCT16	12OCT2016	12	Entered	56	Male	12OCT16	255	MF4637	<250 mg/day	Yes	Yes	<250 mg/day	No	Yes	Yes	Yes	Yes
Visit 2			Normal	Mouth, teeth and throat	12_030	2	Yes	12OCT16	12OCT2016	12	Entered	56	Male	12OCT16	255	MF4637	<250 mg/day	Yes	Yes	<250 mg/day	No	Yes	Yes	Yes	Yes
Visit 2			Normal	Neck and thyroid	12_030	2	Yes	12OCT16	12OCT2016	12	Entered	56	Male	12OCT16	255	MF4637	<250 mg/day	Yes	Yes	<250 mg/day	No	Yes	Yes	Yes	Yes
Visit 2			Normal	Chest	12_030	2	Yes	12OCT16	12OCT2016	12	Entered	56	Male	12OCT16	255	MF4637	<250 mg/day	Yes	Yes	<250 mg/day	No	Yes	Yes	Yes	Yes
Visit 2			Normal	Heart	12_030	2	Yes	12OCT16	12OCT2016	12	Entered	56	Male	12OCT16	255	MF4637	<250 mg/day	Yes	Yes	<250 mg/day	No	Yes	Yes	Yes	Yes
Visit 2			Normal	Abdomen	12_030	2	Yes	12OCT16	12OCT2016	12	Entered	56	Male	12OCT16	255	MF4637	<250 mg/day	Yes	Yes	<250 mg/day	No	Yes	Yes	Yes	Yes
Visit 2			Normal	Dermatologic	12_030	2	Yes	12OCT16	12OCT2016	12	Entered	56	Male	12OCT16	255	MF4637	<250 mg/day	Yes	Yes	<250 mg/day	No	Yes	Yes	Yes	Yes
Visit 2		ELBOWS SCARS SURGERY FOR TRAUMATIC FRACTURE	Abnormal	Musculoskeletal	12_030	2	Yes	12OCT16	12OCT2016	12	Entered	56	Male	12OCT16	255	MF4637	<250 mg/day	Yes	Yes	<250 mg/day	No	Yes	Yes	Yes	Yes
Visit 2			Normal	Circulatory	12_030	2	Yes	12OCT16	12OCT2016	12	Entered	56	Male	12OCT16	255	MF4637	<250 mg/day	Yes	Yes	<250 mg/day	No	Yes	Yes	Yes	Yes
Visit 2			Normal	Neurologic	12_030	2	Yes	12OCT16	12OCT2016	12	Entered	56	Male	12OCT16	255	MF4637	<250 mg/day	Yes	Yes	<250 mg/day	No	Yes	Yes	Yes	Yes
Visit 2			Normal	Lymphatic	12_030	2	Yes	12OCT16	12OCT2016	12	Entered	56	Male	12OCT16	255	MF4637	<250 mg/day	Yes	Yes	<250 mg/day	No	Yes	Yes	Yes	Yes
Visit 2			Normal	Respiratory	12_030	2	Yes	12OCT16	12OCT2016	12	Entered	56	Male	12OCT16	255	MF4637	<250 mg/day	Yes	Yes	<250 mg/day	No	Yes	Yes	Yes	Yes
Visit 2			Not done	Other, specify	12_030	2	Yes	12OCT16	12OCT2016	12	Entered	56	Male	12OCT16	255	MF4637	<250 mg/day	Yes	Yes	<250 mg/day	No	Yes	Yes	Yes	Yes
Visit 2		OBESITY NCS	Abnormal	General appearance	12_032	2	Yes	02NOV16	02NOV2016	12	Entered	67	Male	02NOV16	280	Placebo	>=250 mg/day	Yes	No	>=250 mg/day	No	Yes	Yes	Yes	Yes
Visit 2			Normal	Head, eyes, ears and nose	12_032	2	Yes	02NOV16	02NOV2016	12	Entered	67	Male	02NOV16	280	Placebo	>=250 mg/day	Yes	No	>=250 mg/day	No	Yes	Yes	Yes	Yes
Visit 2			Normal	Mouth, teeth and throat	12_032	2	Yes	02NOV16	02NOV2016	12	Entered	67	Male	02NOV16	280	Placebo	>=250 mg/day	Yes	No	>=250 mg/day	No	Yes	Yes	Yes	Yes
Visit 2			Normal	Neck and thyroid	12_032	2	Yes	02NOV16	02NOV2016	12	Entered	67	Male	02NOV16	280	Placebo	>=250 mg/day	Yes	No	>=250 mg/day	No	Yes	Yes	Yes	Yes
Visit 2			Normal	Chest	12_032	2	Yes	02NOV16	02NOV2016	12	Entered	67	Male	02NOV16	280	Placebo	>=250 mg/day	Yes	No	>=250 mg/day	No	Yes	Yes	Yes	Yes
Visit 2			Normal	Heart	12_032	2	Yes	02NOV16	02NOV2016	12	Entered	67	Male	02NOV16	280	Placebo	>=250 mg/day	Yes	No	>=250 mg/day	No	Yes	Yes	Yes	Yes
Visit 2		UMBILICAL HERNIA NCS	Abnormal	Abdomen	12_032	2	Yes	02NOV16	02NOV2016	12	Entered	67	Male	02NOV16	280	Placebo	>=250 mg/day	Yes	No	>=250 mg/day	No	Yes	Yes	Yes	Yes
Visit 2			Normal	Dermatologic	12_032	2	Yes	02NOV16	02NOV2016	12	Entered	67	Male	02NOV16	280	Placebo	>=250 mg/day	Yes	No	>=250 mg/day	No	Yes	Yes	Yes	Yes
Visit 2			Normal	Musculoskeletal	12_032	2	Yes	02NOV16	02NOV2016	12	Entered	67	Male	02NOV16	280	Placebo	>=250 mg/day	Yes	No	>=250 mg/day	No	Yes	Yes	Yes	Yes
Visit 2			Normal	Circulatory	12_032	2	Yes	02NOV16	02NOV2016	12	Entered	67	Male	02NOV16	280	Placebo	>=250 mg/day	Yes	No	>=250 mg/day	No	Yes	Yes	Yes	Yes
Visit 2			Normal	Neurologic	12_032	2	Yes	02NOV16	02NOV2016	12	Entered	67	Male	02NOV16	280	Placebo	>=250 mg/day	Yes	No	>=250 mg/day	No	Yes	Yes	Yes	Yes
Visit 2			Normal	Lymphatic	12_032	2	Yes	02NOV16	02NOV2016	12	Entered	67	Male	02NOV16	280	Placebo	>=250 mg/day	Yes	No	>=250 mg/day	No	Yes	Yes	Yes	Yes
Visit 2			Normal	Respiratory	12_032	2	Yes	02NOV16	02NOV2016	12	Entered	67	Male	02NOV16	280	Placebo	>=250 mg/day	Yes	No	>=250 mg/day	No	Yes	Yes	Yes	Yes
Visit 2			Not done	Other, specify	12_032	2	Yes	02NOV16	02NOV2016	12	Entered	67	Male	02NOV16	280	Placebo	>=250 mg/day	Yes	No	>=250 mg/day	No	Yes	Yes	Yes	Yes
Visit 2		OBESITY NCS	Abnormal	General appearance	12_033	2	Yes	02NOV16	02NOV2016	12	Entered	72	Female	02NOV16	282	MF4637	>=250 mg/day	Yes	No	>=250 mg/day	No	Yes	Yes	Yes	Yes
Visit 2			Normal	Head, eyes, ears and nose	12_033	2	Yes	02NOV16	02NOV2016	12	Entered	72	Female	02NOV16	282	MF4637	>=250 mg/day	Yes	No	>=250 mg/day	No	Yes	Yes	Yes	Yes
Visit 2			Normal	Mouth, teeth and throat	12_033	2	Yes	02NOV16	02NOV2016	12	Entered	72	Female	02NOV16	282	MF4637	>=250 mg/day	Yes	No	>=250 mg/day	No	Yes	Yes	Yes	Yes
Visit 2			Normal	Neck and thyroid	12_033	2	Yes	02NOV16	02NOV2016	12	Entered	72	Female	02NOV16	282	MF4637	>=250 mg/day	Yes	No	>=250 mg/day	No	Yes	Yes	Yes	Yes
Visit 2			Normal	Chest	12_033	2	Yes	02NOV16	02NOV2016	12	Entered	72	Female	02NOV16	282	MF4637	>=250 mg/day	Yes	No	>=250 mg/day	No	Yes	Yes	Yes	Yes
Visit 2			Normal	Heart	12_033	2	Yes	02NOV16	02NOV2016	12	Entered	72	Female	02NOV16	282	MF4637	>=250 mg/day	Yes	No	>=250 mg/day	No	Yes	Yes	Yes	Yes
Visit 2			Normal	Abdomen	12_033	2	Yes	02NOV16	02NOV2016	12	Entered	72	Female	02NOV16	282	MF4637	>=250 mg/day	Yes	No	>=250 mg/day	No	Yes	Yes	Yes	Yes
Visit 2			Normal	Dermatologic	12_033	2	Yes	02NOV16	02NOV2016	12	Entered	72	Female	02NOV16	282	MF4637	>=250 mg/day	Yes	No	>=250 mg/day	No	Yes	Yes	Yes	Yes
Visit 2			Normal	Musculoskeletal	12_033	2	Yes	02NOV16	02NOV2016	12	Entered	72	Female	02NOV16	282	MF4637	>=250 mg/day	Yes	No	>=250 mg/day	No	Yes	Yes	Yes	Yes
Visit 2			Normal	Circulatory	12_033	2	Yes	02NOV16	02NOV2016	12	Entered	72	Female	02NOV16	282	MF4637	>=250 mg/day	Yes	No	>=250 mg/day	No	Yes	Yes	Yes	Yes
Visit 2			Normal	Neurologic	12_033	2	Yes	02NOV16	02NOV2016	12	Entered	72	Female	02NOV16	282	MF4637	>=250 mg/day	Yes	No	>=250 mg/day	No	Yes	Yes	Yes	Yes
Visit 2			Normal	Lymphatic	12_033	2	Yes	02NOV16	02NOV2016	12	Entered	72	Female	02NOV16	282	MF4637	>=250 mg/day	Yes	No	>=250 mg/day	No	Yes	Yes	Yes	Yes
Visit 2			Normal	Respiratory	12_033	2	Yes	02NOV16	02NOV2016	12	Entered	72	Female	02NOV16	282	MF4637	>=250 mg/day	Yes	No	>=250 mg/day	No	Yes	Yes	Yes	Yes
Visit 2			Not done	Other, specify	12_033	2	Yes	02NOV16	02NOV2016	12	Entered	72	Female	02NOV16	282	MF4637	>=250 mg/day	Yes	No	>=250 mg/day	No	Yes	Yes	Yes	Yes
Visit 2		OBESITY NCS	Abnormal	General appearance	12_034	2	Yes	26OCT16	26OCT2016	12	Entered	55	Female	26OCT16	261	Placebo	>=250 mg/day	Yes	No	>=250 mg/day	No	Yes	Yes	Yes	No
Visit 2			Normal	Head, eyes, ears and nose	12_034	2	Yes	26OCT16	26OCT2016	12	Entered	55	Female	26OCT16	261	Placebo	>=250 mg/day	Yes	No	>=250 mg/day	No	Yes	Yes	Yes	No
Visit 2			Normal	Mouth, teeth and throat	12_034	2	Yes	26OCT16	26OCT2016	12	Entered	55	Female	26OCT16	261	Placebo	>=250 mg/day	Yes	No	>=250 mg/day	No	Yes	Yes	Yes	No
Visit 2			Normal	Neck and thyroid	12_034	2	Yes	26OCT16	26OCT2016	12	Entered	55	Female	26OCT16	261	Placebo	>=250 mg/day	Yes	No	>=250 mg/day	No	Yes	Yes	Yes	No
Visit 2			Normal	Chest	12_034	2	Yes	26OCT16	26OCT2016	12	Entered	55	Female	26OCT16	261	Placebo	>=250 mg/day	Yes	No	>=250 mg/day	No	Yes	Yes	Yes	No
Visit 2			Normal	Heart	12_034	2	Yes	26OCT16	26OCT2016	12	Entered	55	Female	26OCT16	261	Placebo	>=250 mg/day	Yes	No	>=250 mg/day	No	Yes	Yes	Yes	No
Visit 2		CHOLECYSTECTOMY, UMBILICAL HERNIA NCS	Abnormal	Abdomen	12_034	2	Yes	26OCT16	26OCT2016	12	Entered	55	Female	26OCT16	261	Placebo	>=250 mg/day	Yes	No	>=250 mg/day	No	Yes	Yes	Yes	No
Visit 2			Normal	Dermatologic	12_034	2	Yes	26OCT16	26OCT2016	12	Entered	55	Female	26OCT16	261	Placebo	>=250 mg/day	Yes	No	>=250 mg/day	No	Yes	Yes	Yes	No
Visit 2		RIGHT ELBOW POST-TRAUMATIC SCAR NCS	Abnormal	Musculoskeletal	12_034	2	Yes	26OCT16	26OCT2016	12	Entered	55	Female	26OCT16	261	Placebo	>=250 mg/day	Yes	No	>=250 mg/day	No	Yes	Yes	Yes	No
Visit 2			Normal	Circulatory	12_034	2	Yes	26OCT16	26OCT2016	12	Entered	55	Female	26OCT16	261	Placebo	>=250 mg/day	Yes	No	>=250 mg/day	No	Yes	Yes	Yes	No
Visit 2			Normal	Neurologic	12_034	2	Yes	26OCT16	26OCT2016	12	Entered	55	Female	26OCT16	261	Placebo	>=250 mg/day	Yes	No	>=250 mg/day	No	Yes	Yes	Yes	No
Visit 2			Normal	Lymphatic	12_034	2	Yes	26OCT16	26OCT2016	12	Entered	55	Female	26OCT16	261	Placebo	>=250 mg/day	Yes	No	>=250 mg/day	No	Yes	Yes	Yes	No
Visit 2			Normal	Respiratory	12_034	2	Yes	26OCT16	26OCT2016	12	Entered	55	Female	26OCT16	261	Placebo	>=250 mg/day	Yes	No	>=250 mg/day	No	Yes	Yes	Yes	No
Visit 2			Not done	Other, specify	12_034	2	Yes	26OCT16	26OCT2016	12	Entered	55	Female	26OCT16	261	Placebo	>=250 mg/day	Yes	No	>=250 mg/day	No	Yes	Yes	Yes	No
Visit 2			Normal	General appearance	12_038	2	Yes	26OCT16	26OCT2016	12	Entered	62	Male	26OCT16	263	Placebo	>=250 mg/day	Yes	Yes	>=250 mg/day	No	Yes	Yes	Yes	Yes
Visit 2		ANEURISM SURGERY SCAR NCS	Abnormal	Head, eyes, ears and nose	12_038	2	Yes	26OCT16	26OCT2016	12	Entered	62	Male	26OCT16	263	Placebo	>=250 mg/day	Yes	Yes	>=250 mg/day	No	Yes	Yes	Yes	Yes
Visit 2			Normal	Mouth, teeth and throat	12_038	2	Yes	26OCT16	26OCT2016	12	Entered	62	Male	26OCT16	263	Placebo	>=250 mg/day	Yes	Yes	>=250 mg/day	No	Yes	Yes	Yes	Yes
Visit 2			Normal	Neck and thyroid	12_038	2	Yes	26OCT16	26OCT2016	12	Entered	62	Male	26OCT16	263	Placebo	>=250 mg/day	Yes	Yes	>=250 mg/day	No	Yes	Yes	Yes	Yes
Visit 2			Normal	Chest	12_038	2	Yes	26OCT16	26OCT2016	12	Entered	62	Male	26OCT16	263	Placebo	>=250 mg/day	Yes	Yes	>=250 mg/day	No	Yes	Yes	Yes	Yes
Visit 2			Normal	Heart	12_038	2	Yes	26OCT16	26OCT2016	12	Entered	62	Male	26OCT16	263	Placebo	>=250 mg/day	Yes	Yes	>=250 mg/day	No	Yes	Yes	Yes	Yes
Visit 2		CHOLECYSTECTOMY SCARS NCS	Abnormal	Abdomen	12_038	2	Yes	26OCT16	26OCT2016	12	Entered	62	Male	26OCT16	263	Placebo	>=250 mg/day	Yes	Yes	>=250 mg/day	No	Yes	Yes	Yes	Yes
Visit 2			Normal	Dermatologic	12_038	2	Yes	26OCT16	26OCT2016	12	Entered	62	Male	26OCT16	263	Placebo	>=250 mg/day	Yes	Yes	>=250 mg/day	No	Yes	Yes	Yes	Yes
Visit 2			Normal	Musculoskeletal	12_038	2	Yes	26OCT16	26OCT2016	12	Entered	62	Male	26OCT16	263	Placebo	>=250 mg/day	Yes	Yes	>=250 mg/day	No	Yes	Yes	Yes	Yes
Visit 2			Normal	Circulatory	12_038	2	Yes	26OCT16	26OCT2016	12	Entered	62	Male	26OCT16	263	Placebo	>=250 mg/day	Yes	Yes	>=250 mg/day	No	Yes	Yes	Yes	Yes
Visit 2			Normal	Neurologic	12_038	2	Yes	26OCT16	26OCT2016	12	Entered	62	Male	26OCT16	263	Placebo	>=250 mg/day	Yes	Yes	>=250 mg/day	No	Yes	Yes	Yes	Yes
Visit 2			Normal	Lymphatic	12_038	2	Yes	26OCT16	26OCT2016	12	Entered	62	Male	26OCT16	263	Placebo	>=250 mg/day	Yes	Yes	>=250 mg/day	No	Yes	Yes	Yes	Yes
Visit 2			Normal	Respiratory	12_038	2	Yes	26OCT16	26OCT2016	12	Entered	62	Male	26OCT16	263	Placebo	>=250 mg/day	Yes	Yes	>=250 mg/day	No	Yes	Yes	Yes	Yes
Visit 2			Not done	Other, specify	12_038	2	Yes	26OCT16	26OCT2016	12	Entered	62	Male	26OCT16	263	Placebo	>=250 mg/day	Yes	Yes	>=250 mg/day	No	Yes	Yes	Yes	Yes
Visit 2			Normal	General appearance	12_039	2	Yes	26OCT16	26OCT2016	12	Entered	57	Male	26OCT16	262	MF4637	<250 mg/day	No	No	<250 mg/day	No	Yes	Yes	Yes	Yes
Visit 2			Normal	Head, eyes, ears and nose	12_039	2	Yes	26OCT16	26OCT2016	12	Entered	57	Male	26OCT16	262	MF4637	<250 mg/day	No	No	<250 mg/day	No	Yes	Yes	Yes	Yes
Visit 2			Normal	Mouth, teeth and throat	12_039	2	Yes	26OCT16	26OCT2016	12	Entered	57	Male	26OCT16	262	MF4637	<250 mg/day	No	No	<250 mg/day	No	Yes	Yes	Yes	Yes
Visit 2			Normal	Neck and thyroid	12_039	2	Yes	26OCT16	26OCT2016	12	Entered	57	Male	26OCT16	262	MF4637	<250 mg/day	No	No	<250 mg/day	No	Yes	Yes	Yes	Yes
Visit 2			Normal	Chest	12_039	2	Yes	26OCT16	26OCT2016	12	Entered	57	Male	26OCT16	262	MF4637	<250 mg/day	No	No	<250 mg/day	No	Yes	Yes	Yes	Yes
Visit 2			Normal	Heart	12_039	2	Yes	26OCT16	26OCT2016	12	Entered	57	Male	26OCT16	262	MF4637	<250 mg/day	No	No	<250 mg/day	No	Yes	Yes	Yes	Yes
Visit 2			Normal	Abdomen	12_039	2	Yes	26OCT16	26OCT2016	12	Entered	57	Male	26OCT16	262	MF4637	<250 mg/day	No	No	<250 mg/day	No	Yes	Yes	Yes	Yes
Visit 2		LEFT BACK LIPOMA REMOVAL SURGERY SCAR NCS	Abnormal	Dermatologic	12_039	2	Yes	26OCT16	26OCT2016	12	Entered	57	Male	26OCT16	262	MF4637	<250 mg/day	No	No	<250 mg/day	No	Yes	Yes	Yes	Yes
Visit 2		RIGHT SHOULDER ROTATOR SPRAIN NCS	Abnormal	Musculoskeletal	12_039	2	Yes	26OCT16	26OCT2016	12	Entered	57	Male	26OCT16	262	MF4637	<250 mg/day	No	No	<250 mg/day	No	Yes	Yes	Yes	Yes
Visit 2			Normal	Circulatory	12_039	2	Yes	26OCT16	26OCT2016	12	Entered	57	Male	26OCT16	262	MF4637	<250 mg/day	No	No	<250 mg/day	No	Yes	Yes	Yes	Yes
Visit 2			Normal	Neurologic	12_039	2	Yes	26OCT16	26OCT2016	12	Entered	57	Male	26OCT16	262	MF4637	<250 mg/day	No	No	<250 mg/day	No	Yes	Yes	Yes	Yes
Visit 2			Normal	Lymphatic	12_039	2	Yes	26OCT16	26OCT2016	12	Entered	57	Male	26OCT16	262	MF4637	<250 mg/day	No	No	<250 mg/day	No	Yes	Yes	Yes	Yes
Visit 2			Normal	Respiratory	12_039	2	Yes	26OCT16	26OCT2016	12	Entered	57	Male	26OCT16	262	MF4637	<250 mg/day	No	No	<250 mg/day	No	Yes	Yes	Yes	Yes
Visit 2			Not done	Other, specify	12_039	2	Yes	26OCT16	26OCT2016	12	Entered	57	Male	26OCT16	262	MF4637	<250 mg/day	No	No	<250 mg/day	No	Yes	Yes	Yes	Yes
Visit 2		OBESITY NCS	Abnormal	General appearance	12_040	2	Yes	10NOV16	10NOV2016	12	Entered	60	Female	10NOV16	292	MF4637	>=250 mg/day	Yes	Yes	>=250 mg/day	No	Yes	Yes	Yes	Yes
Visit 2			Normal	Head, eyes, ears and nose	12_040	2	Yes	10NOV16	10NOV2016	12	Entered	60	Female	10NOV16	292	MF4637	>=250 mg/day	Yes	Yes	>=250 mg/day	No	Yes	Yes	Yes	Yes
Visit 2			Normal	Mouth, teeth and throat	12_040	2	Yes	10NOV16	10NOV2016	12	Entered	60	Female	10NOV16	292	MF4637	>=250 mg/day	Yes	Yes	>=250 mg/day	No	Yes	Yes	Yes	Yes
Visit 2			Normal	Neck and thyroid	12_040	2	Yes	10NOV16	10NOV2016	12	Entered	60	Female	10NOV16	292	MF4637	>=250 mg/day	Yes	Yes	>=250 mg/day	No	Yes	Yes	Yes	Yes
Visit 2			Normal	Chest	12_040	2	Yes	10NOV16	10NOV2016	12	Entered	60	Female	10NOV16	292	MF4637	>=250 mg/day	Yes	Yes	>=250 mg/day	No	Yes	Yes	Yes	Yes
Visit 2			Normal	Heart	12_040	2	Yes	10NOV16	10NOV2016	12	Entered	60	Female	10NOV16	292	MF4637	>=250 mg/day	Yes	Yes	>=250 mg/day	No	Yes	Yes	Yes	Yes
Visit 2		APPENDECTOMY AND PERITONITIS NCS	Abnormal	Abdomen	12_040	2	Yes	10NOV16	10NOV2016	12	Entered	60	Female	10NOV16	292	MF4637	>=250 mg/day	Yes	Yes	>=250 mg/day	No	Yes	Yes	Yes	Yes
Visit 2			Normal	Dermatologic	12_040	2	Yes	10NOV16	10NOV2016	12	Entered	60	Female	10NOV16	292	MF4637	>=250 mg/day	Yes	Yes	>=250 mg/day	No	Yes	Yes	Yes	Yes
Visit 2			Normal	Musculoskeletal	12_040	2	Yes	10NOV16	10NOV2016	12	Entered	60	Female	10NOV16	292	MF4637	>=250 mg/day	Yes	Yes	>=250 mg/day	No	Yes	Yes	Yes	Yes
Visit 2			Normal	Circulatory	12_040	2	Yes	10NOV16	10NOV2016	12	Entered	60	Female	10NOV16	292	MF4637	>=250 mg/day	Yes	Yes	>=250 mg/day	No	Yes	Yes	Yes	Yes
Visit 2			Normal	Neurologic	12_040	2	Yes	10NOV16	10NOV2016	12	Entered	60	Female	10NOV16	292	MF4637	>=250 mg/day	Yes	Yes	>=250 mg/day	No	Yes	Yes	Yes	Yes
Visit 2			Normal	Lymphatic	12_040	2	Yes	10NOV16	10NOV2016	12	Entered	60	Female	10NOV16	292	MF4637	>=250 mg/day	Yes	Yes	>=250 mg/day	No	Yes	Yes	Yes	Yes
Visit 2			Normal	Respiratory	12_040	2	Yes	10NOV16	10NOV2016	12	Entered	60	Female	10NOV16	292	MF4637	>=250 mg/day	Yes	Yes	>=250 mg/day	No	Yes	Yes	Yes	Yes
Visit 2			Not done	Other, specify	12_040	2	Yes	10NOV16	10NOV2016	12	Entered	60	Female	10NOV16	292	MF4637	>=250 mg/day	Yes	Yes	>=250 mg/day	No	Yes	Yes	Yes	Yes
Visit 2		OVERWEIGHT NCS	Abnormal	General appearance	12_041	2	Yes	10NOV16	10NOV2016	12	Early Termination	54	Female	10NOV16	293	Placebo	>=250 mg/day	Yes	Yes	>=250 mg/day	No	Yes	Yes	Yes	Yes
Visit 2			Normal	Head, eyes, ears and nose	12_041	2	Yes	10NOV16	10NOV2016	12	Early Termination	54	Female	10NOV16	293	Placebo	>=250 mg/day	Yes	Yes	>=250 mg/day	No	Yes	Yes	Yes	Yes
Visit 2			Normal	Mouth, teeth and throat	12_041	2	Yes	10NOV16	10NOV2016	12	Early Termination	54	Female	10NOV16	293	Placebo	>=250 mg/day	Yes	Yes	>=250 mg/day	No	Yes	Yes	Yes	Yes
Visit 2			Normal	Neck and thyroid	12_041	2	Yes	10NOV16	10NOV2016	12	Early Termination	54	Female	10NOV16	293	Placebo	>=250 mg/day	Yes	Yes	>=250 mg/day	No	Yes	Yes	Yes	Yes
Visit 2			Normal	Chest	12_041	2	Yes	10NOV16	10NOV2016	12	Early Termination	54	Female	10NOV16	293	Placebo	>=250 mg/day	Yes	Yes	>=250 mg/day	No	Yes	Yes	Yes	Yes
Visit 2			Normal	Heart	12_041	2	Yes	10NOV16	10NOV2016	12	Early Termination	54	Female	10NOV16	293	Placebo	>=250 mg/day	Yes	Yes	>=250 mg/day	No	Yes	Yes	Yes	Yes
Visit 2		RIGHT INGUINAL HERNIA, DIVERTICULOSIS RESECTION, TUMMY TUCK AND TUBAL LIGATION SCARS NCS	Abnormal	Abdomen	12_041	2	Yes	10NOV16	10NOV2016	12	Early Termination	54	Female	10NOV16	293	Placebo	>=250 mg/day	Yes	Yes	>=250 mg/day	No	Yes	Yes	Yes	Yes
Visit 2		RIGHT BREAST BENIGN CYST REMOVAL. MULTIPLE TATTOOS	Abnormal	Dermatologic	12_041	2	Yes	10NOV16	10NOV2016	12	Early Termination	54	Female	10NOV16	293	Placebo	>=250 mg/day	Yes	Yes	>=250 mg/day	No	Yes	Yes	Yes	Yes
Visit 2			Normal	Musculoskeletal	12_041	2	Yes	10NOV16	10NOV2016	12	Early Termination	54	Female	10NOV16	293	Placebo	>=250 mg/day	Yes	Yes	>=250 mg/day	No	Yes	Yes	Yes	Yes
Visit 2			Normal	Circulatory	12_041	2	Yes	10NOV16	10NOV2016	12	Early Termination	54	Female	10NOV16	293	Placebo	>=250 mg/day	Yes	Yes	>=250 mg/day	No	Yes	Yes	Yes	Yes
Visit 2			Normal	Neurologic	12_041	2	Yes	10NOV16	10NOV2016	12	Early Termination	54	Female	10NOV16	293	Placebo	>=250 mg/day	Yes	Yes	>=250 mg/day	No	Yes	Yes	Yes	Yes
Visit 2			Normal	Lymphatic	12_041	2	Yes	10NOV16	10NOV2016	12	Early Termination	54	Female	10NOV16	293	Placebo	>=250 mg/day	Yes	Yes	>=250 mg/day	No	Yes	Yes	Yes	Yes
Visit 2			Normal	Respiratory	12_041	2	Yes	10NOV16	10NOV2016	12	Early Termination	54	Female	10NOV16	293	Placebo	>=250 mg/day	Yes	Yes	>=250 mg/day	No	Yes	Yes	Yes	Yes
Visit 2			Not done	Other, specify	12_041	2	Yes	10NOV16	10NOV2016	12	Early Termination	54	Female	10NOV16	293	Placebo	>=250 mg/day	Yes	Yes	>=250 mg/day	No	Yes	Yes	Yes	Yes
Visit 2			Normal	General appearance	12_043	2	Yes	03NOV16	03NOV2016	12	Entered	77	Male	03NOV16	283	MF4637	>=250 mg/day	Yes	Yes	>=250 mg/day	No	Yes	Yes	Yes	Yes
Visit 2			Normal	Head, eyes, ears and nose	12_043	2	Yes	03NOV16	03NOV2016	12	Entered	77	Male	03NOV16	283	MF4637	>=250 mg/day	Yes	Yes	>=250 mg/day	No	Yes	Yes	Yes	Yes
Visit 2			Normal	Mouth, teeth and throat	12_043	2	Yes	03NOV16	03NOV2016	12	Entered	77	Male	03NOV16	283	MF4637	>=250 mg/day	Yes	Yes	>=250 mg/day	No	Yes	Yes	Yes	Yes
Visit 2			Normal	Neck and thyroid	12_043	2	Yes	03NOV16	03NOV2016	12	Entered	77	Male	03NOV16	283	MF4637	>=250 mg/day	Yes	Yes	>=250 mg/day	No	Yes	Yes	Yes	Yes
Visit 2			Normal	Chest	12_043	2	Yes	03NOV16	03NOV2016	12	Entered	77	Male	03NOV16	283	MF4637	>=250 mg/day	Yes	Yes	>=250 mg/day	No	Yes	Yes	Yes	Yes
Visit 2			Normal	Heart	12_043	2	Yes	03NOV16	03NOV2016	12	Entered	77	Male	03NOV16	283	MF4637	>=250 mg/day	Yes	Yes	>=250 mg/day	No	Yes	Yes	Yes	Yes
Visit 2			Normal	Abdomen	12_043	2	Yes	03NOV16	03NOV2016	12	Entered	77	Male	03NOV16	283	MF4637	>=250 mg/day	Yes	Yes	>=250 mg/day	No	Yes	Yes	Yes	Yes
Visit 2			Normal	Dermatologic	12_043	2	Yes	03NOV16	03NOV2016	12	Entered	77	Male	03NOV16	283	MF4637	>=250 mg/day	Yes	Yes	>=250 mg/day	No	Yes	Yes	Yes	Yes
Visit 2			Normal	Musculoskeletal	12_043	2	Yes	03NOV16	03NOV2016	12	Entered	77	Male	03NOV16	283	MF4637	>=250 mg/day	Yes	Yes	>=250 mg/day	No	Yes	Yes	Yes	Yes
Visit 2			Normal	Circulatory	12_043	2	Yes	03NOV16	03NOV2016	12	Entered	77	Male	03NOV16	283	MF4637	>=250 mg/day	Yes	Yes	>=250 mg/day	No	Yes	Yes	Yes	Yes
Visit 2			Normal	Neurologic	12_043	2	Yes	03NOV16	03NOV2016	12	Entered	77	Male	03NOV16	283	MF4637	>=250 mg/day	Yes	Yes	>=250 mg/day	No	Yes	Yes	Yes	Yes
Visit 2			Normal	Lymphatic	12_043	2	Yes	03NOV16	03NOV2016	12	Entered	77	Male	03NOV16	283	MF4637	>=250 mg/day	Yes	Yes	>=250 mg/day	No	Yes	Yes	Yes	Yes
Visit 2			Normal	Respiratory	12_043	2	Yes	03NOV16	03NOV2016	12	Entered	77	Male	03NOV16	283	MF4637	>=250 mg/day	Yes	Yes	>=250 mg/day	No	Yes	Yes	Yes	Yes
Visit 2			Not done	Other, specify	12_043	2	Yes	03NOV16	03NOV2016	12	Entered	77	Male	03NOV16	283	MF4637	>=250 mg/day	Yes	Yes	>=250 mg/day	No	Yes	Yes	Yes	Yes
Visit 2		OVERWEIGHT NCS	Abnormal	General appearance	12_044	2	Yes	02NOV16	02NOV2016	12	Entered	66	Male	02NOV16	281	Placebo	>=250 mg/day	Yes	Yes	>=250 mg/day	No	Yes	Yes	Yes	Yes
Visit 2			Normal	Head, eyes, ears and nose	12_044	2	Yes	02NOV16	02NOV2016	12	Entered	66	Male	02NOV16	281	Placebo	>=250 mg/day	Yes	Yes	>=250 mg/day	No	Yes	Yes	Yes	Yes
Visit 2			Normal	Mouth, teeth and throat	12_044	2	Yes	02NOV16	02NOV2016	12	Entered	66	Male	02NOV16	281	Placebo	>=250 mg/day	Yes	Yes	>=250 mg/day	No	Yes	Yes	Yes	Yes
Visit 2			Normal	Neck and thyroid	12_044	2	Yes	02NOV16	02NOV2016	12	Entered	66	Male	02NOV16	281	Placebo	>=250 mg/day	Yes	Yes	>=250 mg/day	No	Yes	Yes	Yes	Yes
Visit 2			Normal	Chest	12_044	2	Yes	02NOV16	02NOV2016	12	Entered	66	Male	02NOV16	281	Placebo	>=250 mg/day	Yes	Yes	>=250 mg/day	No	Yes	Yes	Yes	Yes
Visit 2			Normal	Heart	12_044	2	Yes	02NOV16	02NOV2016	12	Entered	66	Male	02NOV16	281	Placebo	>=250 mg/day	Yes	Yes	>=250 mg/day	No	Yes	Yes	Yes	Yes
Visit 2			Normal	Abdomen	12_044	2	Yes	02NOV16	02NOV2016	12	Entered	66	Male	02NOV16	281	Placebo	>=250 mg/day	Yes	Yes	>=250 mg/day	No	Yes	Yes	Yes	Yes
Visit 2			Normal	Dermatologic	12_044	2	Yes	02NOV16	02NOV2016	12	Entered	66	Male	02NOV16	281	Placebo	>=250 mg/day	Yes	Yes	>=250 mg/day	No	Yes	Yes	Yes	Yes
Visit 2		RIGHT 4TH, 5TH PARTIAL FINGER AMPUTATION NCS	Abnormal	Musculoskeletal	12_044	2	Yes	02NOV16	02NOV2016	12	Entered	66	Male	02NOV16	281	Placebo	>=250 mg/day	Yes	Yes	>=250 mg/day	No	Yes	Yes	Yes	Yes
Visit 2			Normal	Circulatory	12_044	2	Yes	02NOV16	02NOV2016	12	Entered	66	Male	02NOV16	281	Placebo	>=250 mg/day	Yes	Yes	>=250 mg/day	No	Yes	Yes	Yes	Yes
Visit 2			Normal	Neurologic	12_044	2	Yes	02NOV16	02NOV2016	12	Entered	66	Male	02NOV16	281	Placebo	>=250 mg/day	Yes	Yes	>=250 mg/day	No	Yes	Yes	Yes	Yes
Visit 2			Normal	Lymphatic	12_044	2	Yes	02NOV16	02NOV2016	12	Entered	66	Male	02NOV16	281	Placebo	>=250 mg/day	Yes	Yes	>=250 mg/day	No	Yes	Yes	Yes	Yes
Visit 2			Normal	Respiratory	12_044	2	Yes	02NOV16	02NOV2016	12	Entered	66	Male	02NOV16	281	Placebo	>=250 mg/day	Yes	Yes	>=250 mg/day	No	Yes	Yes	Yes	Yes
Visit 2		PENILE IMPLANT NCS	Abnormal	Other, specify	12_044	2	Yes	02NOV16	02NOV2016	12	Entered	66	Male	02NOV16	281	Placebo	>=250 mg/day	Yes	Yes	>=250 mg/day	No	Yes	Yes	Yes	Yes
Visit 2		OVERWEIGHT NCS	Abnormal	General appearance	12_046	2	Yes	03NOV16	03NOV2016	12	Entered	75	Male	03NOV16	284	MF4637	>=250 mg/day	Yes	Yes	>=250 mg/day	No	Yes	Yes	Yes	Yes
Visit 2			Normal	Head, eyes, ears and nose	12_046	2	Yes	03NOV16	03NOV2016	12	Entered	75	Male	03NOV16	284	MF4637	>=250 mg/day	Yes	Yes	>=250 mg/day	No	Yes	Yes	Yes	Yes
Visit 2			Normal	Mouth, teeth and throat	12_046	2	Yes	03NOV16	03NOV2016	12	Entered	75	Male	03NOV16	284	MF4637	>=250 mg/day	Yes	Yes	>=250 mg/day	No	Yes	Yes	Yes	Yes
Visit 2			Normal	Neck and thyroid	12_046	2	Yes	03NOV16	03NOV2016	12	Entered	75	Male	03NOV16	284	MF4637	>=250 mg/day	Yes	Yes	>=250 mg/day	No	Yes	Yes	Yes	Yes
Visit 2			Normal	Chest	12_046	2	Yes	03NOV16	03NOV2016	12	Entered	75	Male	03NOV16	284	MF4637	>=250 mg/day	Yes	Yes	>=250 mg/day	No	Yes	Yes	Yes	Yes
Visit 2			Normal	Heart	12_046	2	Yes	03NOV16	03NOV2016	12	Entered	75	Male	03NOV16	284	MF4637	>=250 mg/day	Yes	Yes	>=250 mg/day	No	Yes	Yes	Yes	Yes
Visit 2			Normal	Abdomen	12_046	2	Yes	03NOV16	03NOV2016	12	Entered	75	Male	03NOV16	284	MF4637	>=250 mg/day	Yes	Yes	>=250 mg/day	No	Yes	Yes	Yes	Yes
Visit 2			Normal	Dermatologic	12_046	2	Yes	03NOV16	03NOV2016	12	Entered	75	Male	03NOV16	284	MF4637	>=250 mg/day	Yes	Yes	>=250 mg/day	No	Yes	Yes	Yes	Yes
Visit 2			Normal	Musculoskeletal	12_046	2	Yes	03NOV16	03NOV2016	12	Entered	75	Male	03NOV16	284	MF4637	>=250 mg/day	Yes	Yes	>=250 mg/day	No	Yes	Yes	Yes	Yes
Visit 2			Normal	Circulatory	12_046	2	Yes	03NOV16	03NOV2016	12	Entered	75	Male	03NOV16	284	MF4637	>=250 mg/day	Yes	Yes	>=250 mg/day	No	Yes	Yes	Yes	Yes
Visit 2			Normal	Neurologic	12_046	2	Yes	03NOV16	03NOV2016	12	Entered	75	Male	03NOV16	284	MF4637	>=250 mg/day	Yes	Yes	>=250 mg/day	No	Yes	Yes	Yes	Yes
Visit 2			Normal	Lymphatic	12_046	2	Yes	03NOV16	03NOV2016	12	Entered	75	Male	03NOV16	284	MF4637	>=250 mg/day	Yes	Yes	>=250 mg/day	No	Yes	Yes	Yes	Yes
Visit 2			Normal	Respiratory	12_046	2	Yes	03NOV16	03NOV2016	12	Entered	75	Male	03NOV16	284	MF4637	>=250 mg/day	Yes	Yes	>=250 mg/day	No	Yes	Yes	Yes	Yes
Visit 2			Not done	Other, specify	12_046	2	Yes	03NOV16	03NOV2016	12	Entered	75	Male	03NOV16	284	MF4637	>=250 mg/day	Yes	Yes	>=250 mg/day	No	Yes	Yes	Yes	Yes
Visit 2		OBESITY NCS	Abnormal	General appearance	12_047	2	Yes	02NOV16	02NOV2016	12	Screen Failure	46	Male							<250 mg/day	Yes	No	No	No	No
Visit 2			Normal	Head, eyes, ears and nose	12_047	2	Yes	02NOV16	02NOV2016	12	Screen Failure	46	Male							<250 mg/day	Yes	No	No	No	No
Visit 2			Normal	Mouth, teeth and throat	12_047	2	Yes	02NOV16	02NOV2016	12	Screen Failure	46	Male							<250 mg/day	Yes	No	No	No	No
Visit 2			Normal	Neck and thyroid	12_047	2	Yes	02NOV16	02NOV2016	12	Screen Failure	46	Male							<250 mg/day	Yes	No	No	No	No
Visit 2			Normal	Chest	12_047	2	Yes	02NOV16	02NOV2016	12	Screen Failure	46	Male							<250 mg/day	Yes	No	No	No	No
Visit 2			Normal	Heart	12_047	2	Yes	02NOV16	02NOV2016	12	Screen Failure	46	Male							<250 mg/day	Yes	No	No	No	No
Visit 2			Normal	Abdomen	12_047	2	Yes	02NOV16	02NOV2016	12	Screen Failure	46	Male							<250 mg/day	Yes	No	No	No	No
Visit 2		SCARS BILATERAL WRIST DUE TO CARPAL TUNNEL SURGERY NCS	Abnormal	Dermatologic	12_047	2	Yes	02NOV16	02NOV2016	12	Screen Failure	46	Male							<250 mg/day	Yes	No	No	No	No
Visit 2			Normal	Musculoskeletal	12_047	2	Yes	02NOV16	02NOV2016	12	Screen Failure	46	Male							<250 mg/day	Yes	No	No	No	No
Visit 2			Normal	Circulatory	12_047	2	Yes	02NOV16	02NOV2016	12	Screen Failure	46	Male							<250 mg/day	Yes	No	No	No	No
Visit 2			Normal	Neurologic	12_047	2	Yes	02NOV16	02NOV2016	12	Screen Failure	46	Male							<250 mg/day	Yes	No	No	No	No
Visit 2			Normal	Lymphatic	12_047	2	Yes	02NOV16	02NOV2016	12	Screen Failure	46	Male							<250 mg/day	Yes	No	No	No	No
Visit 2			Normal	Respiratory	12_047	2	Yes	02NOV16	02NOV2016	12	Screen Failure	46	Male							<250 mg/day	Yes	No	No	No	No
Visit 2			Not done	Other, specify	12_047	2	Yes	02NOV16	02NOV2016	12	Screen Failure	46	Male							<250 mg/day	Yes	No	No	No	No
Visit 2			Normal	General appearance	12_048	2	Yes	03NOV16	03NOV2016	12	Entered	63	Female	03NOV16	285	MF4637	<250 mg/day	Yes	No	<250 mg/day	No	Yes	Yes	Yes	Yes
Visit 2			Normal	Head, eyes, ears and nose	12_048	2	Yes	03NOV16	03NOV2016	12	Entered	63	Female	03NOV16	285	MF4637	<250 mg/day	Yes	No	<250 mg/day	No	Yes	Yes	Yes	Yes
Visit 2			Normal	Mouth, teeth and throat	12_048	2	Yes	03NOV16	03NOV2016	12	Entered	63	Female	03NOV16	285	MF4637	<250 mg/day	Yes	No	<250 mg/day	No	Yes	Yes	Yes	Yes
Visit 2			Normal	Neck and thyroid	12_048	2	Yes	03NOV16	03NOV2016	12	Entered	63	Female	03NOV16	285	MF4637	<250 mg/day	Yes	No	<250 mg/day	No	Yes	Yes	Yes	Yes
Visit 2			Normal	Chest	12_048	2	Yes	03NOV16	03NOV2016	12	Entered	63	Female	03NOV16	285	MF4637	<250 mg/day	Yes	No	<250 mg/day	No	Yes	Yes	Yes	Yes
Visit 2			Normal	Heart	12_048	2	Yes	03NOV16	03NOV2016	12	Entered	63	Female	03NOV16	285	MF4637	<250 mg/day	Yes	No	<250 mg/day	No	Yes	Yes	Yes	Yes
Visit 2			Normal	Abdomen	12_048	2	Yes	03NOV16	03NOV2016	12	Entered	63	Female	03NOV16	285	MF4637	<250 mg/day	Yes	No	<250 mg/day	No	Yes	Yes	Yes	Yes
Visit 2			Normal	Dermatologic	12_048	2	Yes	03NOV16	03NOV2016	12	Entered	63	Female	03NOV16	285	MF4637	<250 mg/day	Yes	No	<250 mg/day	No	Yes	Yes	Yes	Yes
Visit 2			Normal	Musculoskeletal	12_048	2	Yes	03NOV16	03NOV2016	12	Entered	63	Female	03NOV16	285	MF4637	<250 mg/day	Yes	No	<250 mg/day	No	Yes	Yes	Yes	Yes
Visit 2			Normal	Circulatory	12_048	2	Yes	03NOV16	03NOV2016	12	Entered	63	Female	03NOV16	285	MF4637	<250 mg/day	Yes	No	<250 mg/day	No	Yes	Yes	Yes	Yes
Visit 2			Normal	Neurologic	12_048	2	Yes	03NOV16	03NOV2016	12	Entered	63	Female	03NOV16	285	MF4637	<250 mg/day	Yes	No	<250 mg/day	No	Yes	Yes	Yes	Yes
Visit 2			Normal	Lymphatic	12_048	2	Yes	03NOV16	03NOV2016	12	Entered	63	Female	03NOV16	285	MF4637	<250 mg/day	Yes	No	<250 mg/day	No	Yes	Yes	Yes	Yes
Visit 2			Normal	Respiratory	12_048	2	Yes	03NOV16	03NOV2016	12	Entered	63	Female	03NOV16	285	MF4637	<250 mg/day	Yes	No	<250 mg/day	No	Yes	Yes	Yes	Yes
Visit 2			Not done	Other, specify	12_048	2	Yes	03NOV16	03NOV2016	12	Entered	63	Female	03NOV16	285	MF4637	<250 mg/day	Yes	No	<250 mg/day	No	Yes	Yes	Yes	Yes
Visit 2		OBESITY NCS	Abnormal	General appearance	12_054	2	Yes	03NOV16	03NOV2016	12	Entered	60	Female	03NOV16	286	Placebo	>=250 mg/day	Yes	Yes	>=250 mg/day	No	Yes	Yes	Yes	Yes
Visit 2			Normal	Head, eyes, ears and nose	12_054	2	Yes	03NOV16	03NOV2016	12	Entered	60	Female	03NOV16	286	Placebo	>=250 mg/day	Yes	Yes	>=250 mg/day	No	Yes	Yes	Yes	Yes
Visit 2			Normal	Mouth, teeth and throat	12_054	2	Yes	03NOV16	03NOV2016	12	Entered	60	Female	03NOV16	286	Placebo	>=250 mg/day	Yes	Yes	>=250 mg/day	No	Yes	Yes	Yes	Yes
Visit 2			Normal	Neck and thyroid	12_054	2	Yes	03NOV16	03NOV2016	12	Entered	60	Female	03NOV16	286	Placebo	>=250 mg/day	Yes	Yes	>=250 mg/day	No	Yes	Yes	Yes	Yes
Visit 2			Normal	Chest	12_054	2	Yes	03NOV16	03NOV2016	12	Entered	60	Female	03NOV16	286	Placebo	>=250 mg/day	Yes	Yes	>=250 mg/day	No	Yes	Yes	Yes	Yes
Visit 2			Normal	Heart	12_054	2	Yes	03NOV16	03NOV2016	12	Entered	60	Female	03NOV16	286	Placebo	>=250 mg/day	Yes	Yes	>=250 mg/day	No	Yes	Yes	Yes	Yes
Visit 2			Normal	Abdomen	12_054	2	Yes	03NOV16	03NOV2016	12	Entered	60	Female	03NOV16	286	Placebo	>=250 mg/day	Yes	Yes	>=250 mg/day	No	Yes	Yes	Yes	Yes
Visit 2		SCAR LOWER ABDOMINAL AREA DUE TO TUBAL LIGATION NCS	Abnormal	Dermatologic	12_054	2	Yes	03NOV16	03NOV2016	12	Entered	60	Female	03NOV16	286	Placebo	>=250 mg/day	Yes	Yes	>=250 mg/day	No	Yes	Yes	Yes	Yes
Visit 2			Normal	Musculoskeletal	12_054	2	Yes	03NOV16	03NOV2016	12	Entered	60	Female	03NOV16	286	Placebo	>=250 mg/day	Yes	Yes	>=250 mg/day	No	Yes	Yes	Yes	Yes
Visit 2			Normal	Circulatory	12_054	2	Yes	03NOV16	03NOV2016	12	Entered	60	Female	03NOV16	286	Placebo	>=250 mg/day	Yes	Yes	>=250 mg/day	No	Yes	Yes	Yes	Yes
Visit 2			Normal	Neurologic	12_054	2	Yes	03NOV16	03NOV2016	12	Entered	60	Female	03NOV16	286	Placebo	>=250 mg/day	Yes	Yes	>=250 mg/day	No	Yes	Yes	Yes	Yes
Visit 2			Normal	Lymphatic	12_054	2	Yes	03NOV16	03NOV2016	12	Entered	60	Female	03NOV16	286	Placebo	>=250 mg/day	Yes	Yes	>=250 mg/day	No	Yes	Yes	Yes	Yes
Visit 2			Normal	Respiratory	12_054	2	Yes	03NOV16	03NOV2016	12	Entered	60	Female	03NOV16	286	Placebo	>=250 mg/day	Yes	Yes	>=250 mg/day	No	Yes	Yes	Yes	Yes
Visit 2			Not done	Other, specify	12_054	2	Yes	03NOV16	03NOV2016	12	Entered	60	Female	03NOV16	286	Placebo	>=250 mg/day	Yes	Yes	>=250 mg/day	No	Yes	Yes	Yes	Yes
Visit 2		OBESITY NCS	Abnormal	General appearance	12_056	2	Yes	03NOV16	03NOV2016	12	Early Termination	61	Male	03NOV16	287	Placebo	<250 mg/day	Yes	Yes	<250 mg/day	No	Yes	Yes	Yes	Yes
Visit 2			Normal	Head, eyes, ears and nose	12_056	2	Yes	03NOV16	03NOV2016	12	Early Termination	61	Male	03NOV16	287	Placebo	<250 mg/day	Yes	Yes	<250 mg/day	No	Yes	Yes	Yes	Yes
Visit 2			Normal	Mouth, teeth and throat	12_056	2	Yes	03NOV16	03NOV2016	12	Early Termination	61	Male	03NOV16	287	Placebo	<250 mg/day	Yes	Yes	<250 mg/day	No	Yes	Yes	Yes	Yes
Visit 2			Normal	Neck and thyroid	12_056	2	Yes	03NOV16	03NOV2016	12	Early Termination	61	Male	03NOV16	287	Placebo	<250 mg/day	Yes	Yes	<250 mg/day	No	Yes	Yes	Yes	Yes
Visit 2			Normal	Chest	12_056	2	Yes	03NOV16	03NOV2016	12	Early Termination	61	Male	03NOV16	287	Placebo	<250 mg/day	Yes	Yes	<250 mg/day	No	Yes	Yes	Yes	Yes
Visit 2			Normal	Heart	12_056	2	Yes	03NOV16	03NOV2016	12	Early Termination	61	Male	03NOV16	287	Placebo	<250 mg/day	Yes	Yes	<250 mg/day	No	Yes	Yes	Yes	Yes
Visit 2		SURGERY SCAR ON MID-ABDOMINAL LINE (UMBILICAL HERNIA)	Abnormal	Abdomen	12_056	2	Yes	03NOV16	03NOV2016	12	Early Termination	61	Male	03NOV16	287	Placebo	<250 mg/day	Yes	Yes	<250 mg/day	No	Yes	Yes	Yes	Yes
Visit 2			Normal	Dermatologic	12_056	2	Yes	03NOV16	03NOV2016	12	Early Termination	61	Male	03NOV16	287	Placebo	<250 mg/day	Yes	Yes	<250 mg/day	No	Yes	Yes	Yes	Yes
Visit 2			Normal	Musculoskeletal	12_056	2	Yes	03NOV16	03NOV2016	12	Early Termination	61	Male	03NOV16	287	Placebo	<250 mg/day	Yes	Yes	<250 mg/day	No	Yes	Yes	Yes	Yes
Visit 2			Normal	Circulatory	12_056	2	Yes	03NOV16	03NOV2016	12	Early Termination	61	Male	03NOV16	287	Placebo	<250 mg/day	Yes	Yes	<250 mg/day	No	Yes	Yes	Yes	Yes
Visit 2			Normal	Neurologic	12_056	2	Yes	03NOV16	03NOV2016	12	Early Termination	61	Male	03NOV16	287	Placebo	<250 mg/day	Yes	Yes	<250 mg/day	No	Yes	Yes	Yes	Yes
Visit 2			Normal	Lymphatic	12_056	2	Yes	03NOV16	03NOV2016	12	Early Termination	61	Male	03NOV16	287	Placebo	<250 mg/day	Yes	Yes	<250 mg/day	No	Yes	Yes	Yes	Yes
Visit 2			Normal	Respiratory	12_056	2	Yes	03NOV16	03NOV2016	12	Early Termination	61	Male	03NOV16	287	Placebo	<250 mg/day	Yes	Yes	<250 mg/day	No	Yes	Yes	Yes	Yes
Visit 2			Not done	Other, specify	12_056	2	Yes	03NOV16	03NOV2016	12	Early Termination	61	Male	03NOV16	287	Placebo	<250 mg/day	Yes	Yes	<250 mg/day	No	Yes	Yes	Yes	Yes
Visit 2		OVERWEIGHT NCS	Abnormal	General appearance	12_057	2	Yes	10NOV16	10NOV2016	12	Entered	65	Female	10NOV16	294	Placebo	<250 mg/day	Yes	No	<250 mg/day	No	Yes	Yes	Yes	Yes
Visit 2			Normal	Head, eyes, ears and nose	12_057	2	Yes	10NOV16	10NOV2016	12	Entered	65	Female	10NOV16	294	Placebo	<250 mg/day	Yes	No	<250 mg/day	No	Yes	Yes	Yes	Yes
Visit 2			Normal	Mouth, teeth and throat	12_057	2	Yes	10NOV16	10NOV2016	12	Entered	65	Female	10NOV16	294	Placebo	<250 mg/day	Yes	No	<250 mg/day	No	Yes	Yes	Yes	Yes
Visit 2			Normal	Neck and thyroid	12_057	2	Yes	10NOV16	10NOV2016	12	Entered	65	Female	10NOV16	294	Placebo	<250 mg/day	Yes	No	<250 mg/day	No	Yes	Yes	Yes	Yes
Visit 2			Normal	Chest	12_057	2	Yes	10NOV16	10NOV2016	12	Entered	65	Female	10NOV16	294	Placebo	<250 mg/day	Yes	No	<250 mg/day	No	Yes	Yes	Yes	Yes
Visit 2			Normal	Heart	12_057	2	Yes	10NOV16	10NOV2016	12	Entered	65	Female	10NOV16	294	Placebo	<250 mg/day	Yes	No	<250 mg/day	No	Yes	Yes	Yes	Yes
Visit 2		TOTAL HYSTERECTOMY NCS	Abnormal	Abdomen	12_057	2	Yes	10NOV16	10NOV2016	12	Entered	65	Female	10NOV16	294	Placebo	<250 mg/day	Yes	No	<250 mg/day	No	Yes	Yes	Yes	Yes
Visit 2			Normal	Dermatologic	12_057	2	Yes	10NOV16	10NOV2016	12	Entered	65	Female	10NOV16	294	Placebo	<250 mg/day	Yes	No	<250 mg/day	No	Yes	Yes	Yes	Yes
Visit 2		BIALTERAL CARPAL TUNNEL SURGERY SCARS. RIGHT KNEE MENISCAL TEAR REPAIR SCAR	Abnormal	Musculoskeletal	12_057	2	Yes	10NOV16	10NOV2016	12	Entered	65	Female	10NOV16	294	Placebo	<250 mg/day	Yes	No	<250 mg/day	No	Yes	Yes	Yes	Yes
Visit 2			Normal	Circulatory	12_057	2	Yes	10NOV16	10NOV2016	12	Entered	65	Female	10NOV16	294	Placebo	<250 mg/day	Yes	No	<250 mg/day	No	Yes	Yes	Yes	Yes
Visit 2			Normal	Neurologic	12_057	2	Yes	10NOV16	10NOV2016	12	Entered	65	Female	10NOV16	294	Placebo	<250 mg/day	Yes	No	<250 mg/day	No	Yes	Yes	Yes	Yes
Visit 2			Normal	Lymphatic	12_057	2	Yes	10NOV16	10NOV2016	12	Entered	65	Female	10NOV16	294	Placebo	<250 mg/day	Yes	No	<250 mg/day	No	Yes	Yes	Yes	Yes
Visit 2			Normal	Respiratory	12_057	2	Yes	10NOV16	10NOV2016	12	Entered	65	Female	10NOV16	294	Placebo	<250 mg/day	Yes	No	<250 mg/day	No	Yes	Yes	Yes	Yes
Visit 2			Not done	Other, specify	12_057	2	Yes	10NOV16	10NOV2016	12	Entered	65	Female	10NOV16	294	Placebo	<250 mg/day	Yes	No	<250 mg/day	No	Yes	Yes	Yes	Yes
Visit 2		OBESITY NCS	Abnormal	General appearance	12_058	2	Yes	16NOV16	16NOV2016	12	Entered	68	Male	16NOV16	181	Placebo	<250 mg/day	Yes	Yes	<250 mg/day	No	Yes	Yes	Yes	Yes
Visit 2			Normal	Head, eyes, ears and nose	12_058	2	Yes	16NOV16	16NOV2016	12	Entered	68	Male	16NOV16	181	Placebo	<250 mg/day	Yes	Yes	<250 mg/day	No	Yes	Yes	Yes	Yes
Visit 2			Normal	Mouth, teeth and throat	12_058	2	Yes	16NOV16	16NOV2016	12	Entered	68	Male	16NOV16	181	Placebo	<250 mg/day	Yes	Yes	<250 mg/day	No	Yes	Yes	Yes	Yes
Visit 2			Normal	Neck and thyroid	12_058	2	Yes	16NOV16	16NOV2016	12	Entered	68	Male	16NOV16	181	Placebo	<250 mg/day	Yes	Yes	<250 mg/day	No	Yes	Yes	Yes	Yes
Visit 2			Normal	Chest	12_058	2	Yes	16NOV16	16NOV2016	12	Entered	68	Male	16NOV16	181	Placebo	<250 mg/day	Yes	Yes	<250 mg/day	No	Yes	Yes	Yes	Yes
Visit 2			Normal	Heart	12_058	2	Yes	16NOV16	16NOV2016	12	Entered	68	Male	16NOV16	181	Placebo	<250 mg/day	Yes	Yes	<250 mg/day	No	Yes	Yes	Yes	Yes
Visit 2			Normal	Abdomen	12_058	2	Yes	16NOV16	16NOV2016	12	Entered	68	Male	16NOV16	181	Placebo	<250 mg/day	Yes	Yes	<250 mg/day	No	Yes	Yes	Yes	Yes
Visit 2			Normal	Dermatologic	12_058	2	Yes	16NOV16	16NOV2016	12	Entered	68	Male	16NOV16	181	Placebo	<250 mg/day	Yes	Yes	<250 mg/day	No	Yes	Yes	Yes	Yes
Visit 2			Normal	Musculoskeletal	12_058	2	Yes	16NOV16	16NOV2016	12	Entered	68	Male	16NOV16	181	Placebo	<250 mg/day	Yes	Yes	<250 mg/day	No	Yes	Yes	Yes	Yes
Visit 2			Normal	Circulatory	12_058	2	Yes	16NOV16	16NOV2016	12	Entered	68	Male	16NOV16	181	Placebo	<250 mg/day	Yes	Yes	<250 mg/day	No	Yes	Yes	Yes	Yes
Visit 2			Normal	Neurologic	12_058	2	Yes	16NOV16	16NOV2016	12	Entered	68	Male	16NOV16	181	Placebo	<250 mg/day	Yes	Yes	<250 mg/day	No	Yes	Yes	Yes	Yes
Visit 2			Normal	Lymphatic	12_058	2	Yes	16NOV16	16NOV2016	12	Entered	68	Male	16NOV16	181	Placebo	<250 mg/day	Yes	Yes	<250 mg/day	No	Yes	Yes	Yes	Yes
Visit 2			Normal	Respiratory	12_058	2	Yes	16NOV16	16NOV2016	12	Entered	68	Male	16NOV16	181	Placebo	<250 mg/day	Yes	Yes	<250 mg/day	No	Yes	Yes	Yes	Yes
Visit 2		PENILE IMPLANT NCS	Abnormal	Other, specify	12_058	2	Yes	16NOV16	16NOV2016	12	Entered	68	Male	16NOV16	181	Placebo	<250 mg/day	Yes	Yes	<250 mg/day	No	Yes	Yes	Yes	Yes
Visit 2		OBESITY NCS	Abnormal	General appearance	12_062	2	Yes	16NOV16	16NOV2016	12	Entered	53	Male	16NOV16	295	MF4637	<250 mg/day	Yes	No	<250 mg/day	No	Yes	Yes	Yes	Yes
Visit 2			Normal	Head, eyes, ears and nose	12_062	2	Yes	16NOV16	16NOV2016	12	Entered	53	Male	16NOV16	295	MF4637	<250 mg/day	Yes	No	<250 mg/day	No	Yes	Yes	Yes	Yes
Visit 2			Normal	Mouth, teeth and throat	12_062	2	Yes	16NOV16	16NOV2016	12	Entered	53	Male	16NOV16	295	MF4637	<250 mg/day	Yes	No	<250 mg/day	No	Yes	Yes	Yes	Yes
Visit 2			Normal	Neck and thyroid	12_062	2	Yes	16NOV16	16NOV2016	12	Entered	53	Male	16NOV16	295	MF4637	<250 mg/day	Yes	No	<250 mg/day	No	Yes	Yes	Yes	Yes
Visit 2			Normal	Chest	12_062	2	Yes	16NOV16	16NOV2016	12	Entered	53	Male	16NOV16	295	MF4637	<250 mg/day	Yes	No	<250 mg/day	No	Yes	Yes	Yes	Yes
Visit 2			Normal	Heart	12_062	2	Yes	16NOV16	16NOV2016	12	Entered	53	Male	16NOV16	295	MF4637	<250 mg/day	Yes	No	<250 mg/day	No	Yes	Yes	Yes	Yes
Visit 2			Normal	Abdomen	12_062	2	Yes	16NOV16	16NOV2016	12	Entered	53	Male	16NOV16	295	MF4637	<250 mg/day	Yes	No	<250 mg/day	No	Yes	Yes	Yes	Yes
Visit 2			Normal	Dermatologic	12_062	2	Yes	16NOV16	16NOV2016	12	Entered	53	Male	16NOV16	295	MF4637	<250 mg/day	Yes	No	<250 mg/day	No	Yes	Yes	Yes	Yes
Visit 2			Normal	Musculoskeletal	12_062	2	Yes	16NOV16	16NOV2016	12	Entered	53	Male	16NOV16	295	MF4637	<250 mg/day	Yes	No	<250 mg/day	No	Yes	Yes	Yes	Yes
Visit 2			Normal	Circulatory	12_062	2	Yes	16NOV16	16NOV2016	12	Entered	53	Male	16NOV16	295	MF4637	<250 mg/day	Yes	No	<250 mg/day	No	Yes	Yes	Yes	Yes
Visit 2			Normal	Neurologic	12_062	2	Yes	16NOV16	16NOV2016	12	Entered	53	Male	16NOV16	295	MF4637	<250 mg/day	Yes	No	<250 mg/day	No	Yes	Yes	Yes	Yes
Visit 2			Normal	Lymphatic	12_062	2	Yes	16NOV16	16NOV2016	12	Entered	53	Male	16NOV16	295	MF4637	<250 mg/day	Yes	No	<250 mg/day	No	Yes	Yes	Yes	Yes
Visit 2			Normal	Respiratory	12_062	2	Yes	16NOV16	16NOV2016	12	Entered	53	Male	16NOV16	295	MF4637	<250 mg/day	Yes	No	<250 mg/day	No	Yes	Yes	Yes	Yes
Visit 2			Not done	Other, specify	12_062	2	Yes	16NOV16	16NOV2016	12	Entered	53	Male	16NOV16	295	MF4637	<250 mg/day	Yes	No	<250 mg/day	No	Yes	Yes	Yes	Yes
Visit 2		OBESITY NCS	Abnormal	General appearance	12_065	2	Yes	16NOV16	16NOV2016	12	Entered	76	Female	16NOV16	182	MF4637	<250 mg/day	Yes	Yes	<250 mg/day	No	Yes	Yes	Yes	Yes
Visit 2			Normal	Head, eyes, ears and nose	12_065	2	Yes	16NOV16	16NOV2016	12	Entered	76	Female	16NOV16	182	MF4637	<250 mg/day	Yes	Yes	<250 mg/day	No	Yes	Yes	Yes	Yes
Visit 2			Normal	Mouth, teeth and throat	12_065	2	Yes	16NOV16	16NOV2016	12	Entered	76	Female	16NOV16	182	MF4637	<250 mg/day	Yes	Yes	<250 mg/day	No	Yes	Yes	Yes	Yes
Visit 2			Normal	Neck and thyroid	12_065	2	Yes	16NOV16	16NOV2016	12	Entered	76	Female	16NOV16	182	MF4637	<250 mg/day	Yes	Yes	<250 mg/day	No	Yes	Yes	Yes	Yes
Visit 2			Normal	Chest	12_065	2	Yes	16NOV16	16NOV2016	12	Entered	76	Female	16NOV16	182	MF4637	<250 mg/day	Yes	Yes	<250 mg/day	No	Yes	Yes	Yes	Yes
Visit 2			Normal	Heart	12_065	2	Yes	16NOV16	16NOV2016	12	Entered	76	Female	16NOV16	182	MF4637	<250 mg/day	Yes	Yes	<250 mg/day	No	Yes	Yes	Yes	Yes
Visit 2		HYSTERECTOMY SCAR	Abnormal	Abdomen	12_065	2	Yes	16NOV16	16NOV2016	12	Entered	76	Female	16NOV16	182	MF4637	<250 mg/day	Yes	Yes	<250 mg/day	No	Yes	Yes	Yes	Yes
Visit 2			Normal	Dermatologic	12_065	2	Yes	16NOV16	16NOV2016	12	Entered	76	Female	16NOV16	182	MF4637	<250 mg/day	Yes	Yes	<250 mg/day	No	Yes	Yes	Yes	Yes
Visit 2		SCAR ON LOWER BACK DUE TO SPINE SURGERY NCS	Abnormal	Musculoskeletal	12_065	2	Yes	16NOV16	16NOV2016	12	Entered	76	Female	16NOV16	182	MF4637	<250 mg/day	Yes	Yes	<250 mg/day	No	Yes	Yes	Yes	Yes
Visit 2			Normal	Circulatory	12_065	2	Yes	16NOV16	16NOV2016	12	Entered	76	Female	16NOV16	182	MF4637	<250 mg/day	Yes	Yes	<250 mg/day	No	Yes	Yes	Yes	Yes
Visit 2			Normal	Neurologic	12_065	2	Yes	16NOV16	16NOV2016	12	Entered	76	Female	16NOV16	182	MF4637	<250 mg/day	Yes	Yes	<250 mg/day	No	Yes	Yes	Yes	Yes
Visit 2			Normal	Lymphatic	12_065	2	Yes	16NOV16	16NOV2016	12	Entered	76	Female	16NOV16	182	MF4637	<250 mg/day	Yes	Yes	<250 mg/day	No	Yes	Yes	Yes	Yes
Visit 2			Normal	Respiratory	12_065	2	Yes	16NOV16	16NOV2016	12	Entered	76	Female	16NOV16	182	MF4637	<250 mg/day	Yes	Yes	<250 mg/day	No	Yes	Yes	Yes	Yes
Visit 2			Not done	Other, specify	12_065	2	Yes	16NOV16	16NOV2016	12	Entered	76	Female	16NOV16	182	MF4637	<250 mg/day	Yes	Yes	<250 mg/day	No	Yes	Yes	Yes	Yes
Visit 2		OBESITY NCS	Abnormal	General appearance	12_067	2	Yes	16NOV16	16NOV2016	12	Entered	72	Female	16NOV16	180	MF4637	>=250 mg/day	Yes	Yes	>=250 mg/day	No	Yes	Yes	Yes	Yes
Visit 2			Normal	Head, eyes, ears and nose	12_067	2	Yes	16NOV16	16NOV2016	12	Entered	72	Female	16NOV16	180	MF4637	>=250 mg/day	Yes	Yes	>=250 mg/day	No	Yes	Yes	Yes	Yes
Visit 2			Normal	Mouth, teeth and throat	12_067	2	Yes	16NOV16	16NOV2016	12	Entered	72	Female	16NOV16	180	MF4637	>=250 mg/day	Yes	Yes	>=250 mg/day	No	Yes	Yes	Yes	Yes
Visit 2			Normal	Neck and thyroid	12_067	2	Yes	16NOV16	16NOV2016	12	Entered	72	Female	16NOV16	180	MF4637	>=250 mg/day	Yes	Yes	>=250 mg/day	No	Yes	Yes	Yes	Yes
Visit 2			Normal	Chest	12_067	2	Yes	16NOV16	16NOV2016	12	Entered	72	Female	16NOV16	180	MF4637	>=250 mg/day	Yes	Yes	>=250 mg/day	No	Yes	Yes	Yes	Yes
Visit 2			Normal	Heart	12_067	2	Yes	16NOV16	16NOV2016	12	Entered	72	Female	16NOV16	180	MF4637	>=250 mg/day	Yes	Yes	>=250 mg/day	No	Yes	Yes	Yes	Yes
Visit 2			Normal	Abdomen	12_067	2	Yes	16NOV16	16NOV2016	12	Entered	72	Female	16NOV16	180	MF4637	>=250 mg/day	Yes	Yes	>=250 mg/day	No	Yes	Yes	Yes	Yes
Visit 2			Normal	Dermatologic	12_067	2	Yes	16NOV16	16NOV2016	12	Entered	72	Female	16NOV16	180	MF4637	>=250 mg/day	Yes	Yes	>=250 mg/day	No	Yes	Yes	Yes	Yes
Visit 2			Normal	Musculoskeletal	12_067	2	Yes	16NOV16	16NOV2016	12	Entered	72	Female	16NOV16	180	MF4637	>=250 mg/day	Yes	Yes	>=250 mg/day	No	Yes	Yes	Yes	Yes
Visit 2			Normal	Circulatory	12_067	2	Yes	16NOV16	16NOV2016	12	Entered	72	Female	16NOV16	180	MF4637	>=250 mg/day	Yes	Yes	>=250 mg/day	No	Yes	Yes	Yes	Yes
Visit 2			Normal	Neurologic	12_067	2	Yes	16NOV16	16NOV2016	12	Entered	72	Female	16NOV16	180	MF4637	>=250 mg/day	Yes	Yes	>=250 mg/day	No	Yes	Yes	Yes	Yes
Visit 2			Normal	Lymphatic	12_067	2	Yes	16NOV16	16NOV2016	12	Entered	72	Female	16NOV16	180	MF4637	>=250 mg/day	Yes	Yes	>=250 mg/day	No	Yes	Yes	Yes	Yes
Visit 2			Normal	Respiratory	12_067	2	Yes	16NOV16	16NOV2016	12	Entered	72	Female	16NOV16	180	MF4637	>=250 mg/day	Yes	Yes	>=250 mg/day	No	Yes	Yes	Yes	Yes
Visit 2			Not done	Other, specify	12_067	2	Yes	16NOV16	16NOV2016	12	Entered	72	Female	16NOV16	180	MF4637	>=250 mg/day	Yes	Yes	>=250 mg/day	No	Yes	Yes	Yes	Yes
Visit 2			Normal	General appearance	12_068	2	Yes	21NOV16	21NOV2016	12	Entered	78	Female	21NOV16	183	Placebo	>=250 mg/day	Yes	Yes	>=250 mg/day	No	Yes	Yes	Yes	Yes
Visit 2			Normal	Head, eyes, ears and nose	12_068	2	Yes	21NOV16	21NOV2016	12	Entered	78	Female	21NOV16	183	Placebo	>=250 mg/day	Yes	Yes	>=250 mg/day	No	Yes	Yes	Yes	Yes
Visit 2			Normal	Mouth, teeth and throat	12_068	2	Yes	21NOV16	21NOV2016	12	Entered	78	Female	21NOV16	183	Placebo	>=250 mg/day	Yes	Yes	>=250 mg/day	No	Yes	Yes	Yes	Yes
Visit 2			Normal	Neck and thyroid	12_068	2	Yes	21NOV16	21NOV2016	12	Entered	78	Female	21NOV16	183	Placebo	>=250 mg/day	Yes	Yes	>=250 mg/day	No	Yes	Yes	Yes	Yes
Visit 2			Normal	Chest	12_068	2	Yes	21NOV16	21NOV2016	12	Entered	78	Female	21NOV16	183	Placebo	>=250 mg/day	Yes	Yes	>=250 mg/day	No	Yes	Yes	Yes	Yes
Visit 2			Normal	Heart	12_068	2	Yes	21NOV16	21NOV2016	12	Entered	78	Female	21NOV16	183	Placebo	>=250 mg/day	Yes	Yes	>=250 mg/day	No	Yes	Yes	Yes	Yes
Visit 2			Normal	Abdomen	12_068	2	Yes	21NOV16	21NOV2016	12	Entered	78	Female	21NOV16	183	Placebo	>=250 mg/day	Yes	Yes	>=250 mg/day	No	Yes	Yes	Yes	Yes
Visit 2		SCAR ABDOMINAL SURGERY ECTOPIC PREGNANCY NCS	Abnormal	Dermatologic	12_068	2	Yes	21NOV16	21NOV2016	12	Entered	78	Female	21NOV16	183	Placebo	>=250 mg/day	Yes	Yes	>=250 mg/day	No	Yes	Yes	Yes	Yes
Visit 2			Normal	Musculoskeletal	12_068	2	Yes	21NOV16	21NOV2016	12	Entered	78	Female	21NOV16	183	Placebo	>=250 mg/day	Yes	Yes	>=250 mg/day	No	Yes	Yes	Yes	Yes
Visit 2			Normal	Circulatory	12_068	2	Yes	21NOV16	21NOV2016	12	Entered	78	Female	21NOV16	183	Placebo	>=250 mg/day	Yes	Yes	>=250 mg/day	No	Yes	Yes	Yes	Yes
Visit 2			Normal	Neurologic	12_068	2	Yes	21NOV16	21NOV2016	12	Entered	78	Female	21NOV16	183	Placebo	>=250 mg/day	Yes	Yes	>=250 mg/day	No	Yes	Yes	Yes	Yes
Visit 2			Normal	Lymphatic	12_068	2	Yes	21NOV16	21NOV2016	12	Entered	78	Female	21NOV16	183	Placebo	>=250 mg/day	Yes	Yes	>=250 mg/day	No	Yes	Yes	Yes	Yes
Visit 2			Normal	Respiratory	12_068	2	Yes	21NOV16	21NOV2016	12	Entered	78	Female	21NOV16	183	Placebo	>=250 mg/day	Yes	Yes	>=250 mg/day	No	Yes	Yes	Yes	Yes
Visit 2			Not done	Other, specify	12_068	2	Yes	21NOV16	21NOV2016	12	Entered	78	Female	21NOV16	183	Placebo	>=250 mg/day	Yes	Yes	>=250 mg/day	No	Yes	Yes	Yes	Yes
Visit 2		Obese	Abnormal	General appearance	13_001	2	Yes	27OCT16	27OCT2016	13	Entered	42	Female	28OCT16	162	Placebo	<250 mg/day	No	No	>=250 mg/day	No	Yes	Yes	Yes	Yes
Visit 2			Normal	Head, eyes, ears and nose	13_001	2	Yes	27OCT16	27OCT2016	13	Entered	42	Female	28OCT16	162	Placebo	<250 mg/day	No	No	>=250 mg/day	No	Yes	Yes	Yes	Yes
Visit 2			Normal	Mouth, teeth and throat	13_001	2	Yes	27OCT16	27OCT2016	13	Entered	42	Female	28OCT16	162	Placebo	<250 mg/day	No	No	>=250 mg/day	No	Yes	Yes	Yes	Yes
Visit 2			Normal	Neck and thyroid	13_001	2	Yes	27OCT16	27OCT2016	13	Entered	42	Female	28OCT16	162	Placebo	<250 mg/day	No	No	>=250 mg/day	No	Yes	Yes	Yes	Yes
Visit 2			Normal	Chest	13_001	2	Yes	27OCT16	27OCT2016	13	Entered	42	Female	28OCT16	162	Placebo	<250 mg/day	No	No	>=250 mg/day	No	Yes	Yes	Yes	Yes
Visit 2			Normal	Heart	13_001	2	Yes	27OCT16	27OCT2016	13	Entered	42	Female	28OCT16	162	Placebo	<250 mg/day	No	No	>=250 mg/day	No	Yes	Yes	Yes	Yes
Visit 2			Normal	Abdomen	13_001	2	Yes	27OCT16	27OCT2016	13	Entered	42	Female	28OCT16	162	Placebo	<250 mg/day	No	No	>=250 mg/day	No	Yes	Yes	Yes	Yes
Visit 2			Normal	Dermatologic	13_001	2	Yes	27OCT16	27OCT2016	13	Entered	42	Female	28OCT16	162	Placebo	<250 mg/day	No	No	>=250 mg/day	No	Yes	Yes	Yes	Yes
Visit 2			Normal	Musculoskeletal	13_001	2	Yes	27OCT16	27OCT2016	13	Entered	42	Female	28OCT16	162	Placebo	<250 mg/day	No	No	>=250 mg/day	No	Yes	Yes	Yes	Yes
Visit 2			Normal	Circulatory	13_001	2	Yes	27OCT16	27OCT2016	13	Entered	42	Female	28OCT16	162	Placebo	<250 mg/day	No	No	>=250 mg/day	No	Yes	Yes	Yes	Yes
Visit 2			Normal	Neurologic	13_001	2	Yes	27OCT16	27OCT2016	13	Entered	42	Female	28OCT16	162	Placebo	<250 mg/day	No	No	>=250 mg/day	No	Yes	Yes	Yes	Yes
Visit 2			Normal	Lymphatic	13_001	2	Yes	27OCT16	27OCT2016	13	Entered	42	Female	28OCT16	162	Placebo	<250 mg/day	No	No	>=250 mg/day	No	Yes	Yes	Yes	Yes
Visit 2			Normal	Respiratory	13_001	2	Yes	27OCT16	27OCT2016	13	Entered	42	Female	28OCT16	162	Placebo	<250 mg/day	No	No	>=250 mg/day	No	Yes	Yes	Yes	Yes
Visit 2			Not done	Other, specify	13_001	2	Yes	27OCT16	27OCT2016	13	Entered	42	Female	28OCT16	162	Placebo	<250 mg/day	No	No	>=250 mg/day	No	Yes	Yes	Yes	Yes
Visit 2			Normal	General appearance	13_002	2	Yes	19OCT16	19OCT2016	13	Entered	67	Female	20OCT16	204	MF4637	<250 mg/day	Yes	Yes	<250 mg/day	No	Yes	Yes	Yes	Yes
Visit 2		Corrective lenses	Abnormal	Head, eyes, ears and nose	13_002	2	Yes	19OCT16	19OCT2016	13	Entered	67	Female	20OCT16	204	MF4637	<250 mg/day	Yes	Yes	<250 mg/day	No	Yes	Yes	Yes	Yes
Visit 2			Normal	Mouth, teeth and throat	13_002	2	Yes	19OCT16	19OCT2016	13	Entered	67	Female	20OCT16	204	MF4637	<250 mg/day	Yes	Yes	<250 mg/day	No	Yes	Yes	Yes	Yes
Visit 2			Normal	Neck and thyroid	13_002	2	Yes	19OCT16	19OCT2016	13	Entered	67	Female	20OCT16	204	MF4637	<250 mg/day	Yes	Yes	<250 mg/day	No	Yes	Yes	Yes	Yes
Visit 2			Normal	Chest	13_002	2	Yes	19OCT16	19OCT2016	13	Entered	67	Female	20OCT16	204	MF4637	<250 mg/day	Yes	Yes	<250 mg/day	No	Yes	Yes	Yes	Yes
Visit 2			Normal	Heart	13_002	2	Yes	19OCT16	19OCT2016	13	Entered	67	Female	20OCT16	204	MF4637	<250 mg/day	Yes	Yes	<250 mg/day	No	Yes	Yes	Yes	Yes
Visit 2			Normal	Abdomen	13_002	2	Yes	19OCT16	19OCT2016	13	Entered	67	Female	20OCT16	204	MF4637	<250 mg/day	Yes	Yes	<250 mg/day	No	Yes	Yes	Yes	Yes
Visit 2		Age spots	Abnormal	Dermatologic	13_002	2	Yes	19OCT16	19OCT2016	13	Entered	67	Female	20OCT16	204	MF4637	<250 mg/day	Yes	Yes	<250 mg/day	No	Yes	Yes	Yes	Yes
Visit 2			Normal	Musculoskeletal	13_002	2	Yes	19OCT16	19OCT2016	13	Entered	67	Female	20OCT16	204	MF4637	<250 mg/day	Yes	Yes	<250 mg/day	No	Yes	Yes	Yes	Yes
Visit 2			Normal	Circulatory	13_002	2	Yes	19OCT16	19OCT2016	13	Entered	67	Female	20OCT16	204	MF4637	<250 mg/day	Yes	Yes	<250 mg/day	No	Yes	Yes	Yes	Yes
Visit 2			Normal	Neurologic	13_002	2	Yes	19OCT16	19OCT2016	13	Entered	67	Female	20OCT16	204	MF4637	<250 mg/day	Yes	Yes	<250 mg/day	No	Yes	Yes	Yes	Yes
Visit 2			Normal	Lymphatic	13_002	2	Yes	19OCT16	19OCT2016	13	Entered	67	Female	20OCT16	204	MF4637	<250 mg/day	Yes	Yes	<250 mg/day	No	Yes	Yes	Yes	Yes
Visit 2			Normal	Respiratory	13_002	2	Yes	19OCT16	19OCT2016	13	Entered	67	Female	20OCT16	204	MF4637	<250 mg/day	Yes	Yes	<250 mg/day	No	Yes	Yes	Yes	Yes
Visit 2			Not done	Other, specify	13_002	2	Yes	19OCT16	19OCT2016	13	Entered	67	Female	20OCT16	204	MF4637	<250 mg/day	Yes	Yes	<250 mg/day	No	Yes	Yes	Yes	Yes
Visit 2		Overweight	Abnormal	General appearance	13_003	2	Yes	19OCT16	19OCT2016	13	Entered	65	Female	20OCT16	205	Placebo	<250 mg/day	Yes	Yes	<250 mg/day	No	Yes	Yes	Yes	Yes
Visit 2			Normal	Head, eyes, ears and nose	13_003	2	Yes	19OCT16	19OCT2016	13	Entered	65	Female	20OCT16	205	Placebo	<250 mg/day	Yes	Yes	<250 mg/day	No	Yes	Yes	Yes	Yes
Visit 2			Normal	Mouth, teeth and throat	13_003	2	Yes	19OCT16	19OCT2016	13	Entered	65	Female	20OCT16	205	Placebo	<250 mg/day	Yes	Yes	<250 mg/day	No	Yes	Yes	Yes	Yes
Visit 2			Normal	Neck and thyroid	13_003	2	Yes	19OCT16	19OCT2016	13	Entered	65	Female	20OCT16	205	Placebo	<250 mg/day	Yes	Yes	<250 mg/day	No	Yes	Yes	Yes	Yes
Visit 2			Normal	Chest	13_003	2	Yes	19OCT16	19OCT2016	13	Entered	65	Female	20OCT16	205	Placebo	<250 mg/day	Yes	Yes	<250 mg/day	No	Yes	Yes	Yes	Yes
Visit 2			Normal	Heart	13_003	2	Yes	19OCT16	19OCT2016	13	Entered	65	Female	20OCT16	205	Placebo	<250 mg/day	Yes	Yes	<250 mg/day	No	Yes	Yes	Yes	Yes
Visit 2			Normal	Abdomen	13_003	2	Yes	19OCT16	19OCT2016	13	Entered	65	Female	20OCT16	205	Placebo	<250 mg/day	Yes	Yes	<250 mg/day	No	Yes	Yes	Yes	Yes
Visit 2		Age spots	Abnormal	Dermatologic	13_003	2	Yes	19OCT16	19OCT2016	13	Entered	65	Female	20OCT16	205	Placebo	<250 mg/day	Yes	Yes	<250 mg/day	No	Yes	Yes	Yes	Yes
Visit 2			Normal	Musculoskeletal	13_003	2	Yes	19OCT16	19OCT2016	13	Entered	65	Female	20OCT16	205	Placebo	<250 mg/day	Yes	Yes	<250 mg/day	No	Yes	Yes	Yes	Yes
Visit 2			Normal	Circulatory	13_003	2	Yes	19OCT16	19OCT2016	13	Entered	65	Female	20OCT16	205	Placebo	<250 mg/day	Yes	Yes	<250 mg/day	No	Yes	Yes	Yes	Yes
Visit 2			Normal	Neurologic	13_003	2	Yes	19OCT16	19OCT2016	13	Entered	65	Female	20OCT16	205	Placebo	<250 mg/day	Yes	Yes	<250 mg/day	No	Yes	Yes	Yes	Yes
Visit 2			Normal	Lymphatic	13_003	2	Yes	19OCT16	19OCT2016	13	Entered	65	Female	20OCT16	205	Placebo	<250 mg/day	Yes	Yes	<250 mg/day	No	Yes	Yes	Yes	Yes
Visit 2			Normal	Respiratory	13_003	2	Yes	19OCT16	19OCT2016	13	Entered	65	Female	20OCT16	205	Placebo	<250 mg/day	Yes	Yes	<250 mg/day	No	Yes	Yes	Yes	Yes
Visit 2			Not done	Other, specify	13_003	2	Yes	19OCT16	19OCT2016	13	Entered	65	Female	20OCT16	205	Placebo	<250 mg/day	Yes	Yes	<250 mg/day	No	Yes	Yes	Yes	Yes
Visit 2		Obese	Abnormal	General appearance	13_004	2	Yes	19OCT16	19OCT2016	13	Entered	69	Female	20OCT16	206	MF4637	<250 mg/day	No	Yes	<250 mg/day	No	Yes	Yes	Yes	Yes
Visit 2			Normal	Head, eyes, ears and nose	13_004	2	Yes	19OCT16	19OCT2016	13	Entered	69	Female	20OCT16	206	MF4637	<250 mg/day	No	Yes	<250 mg/day	No	Yes	Yes	Yes	Yes
Visit 2			Normal	Mouth, teeth and throat	13_004	2	Yes	19OCT16	19OCT2016	13	Entered	69	Female	20OCT16	206	MF4637	<250 mg/day	No	Yes	<250 mg/day	No	Yes	Yes	Yes	Yes
Visit 2			Normal	Neck and thyroid	13_004	2	Yes	19OCT16	19OCT2016	13	Entered	69	Female	20OCT16	206	MF4637	<250 mg/day	No	Yes	<250 mg/day	No	Yes	Yes	Yes	Yes
Visit 2			Normal	Chest	13_004	2	Yes	19OCT16	19OCT2016	13	Entered	69	Female	20OCT16	206	MF4637	<250 mg/day	No	Yes	<250 mg/day	No	Yes	Yes	Yes	Yes
Visit 2			Normal	Heart	13_004	2	Yes	19OCT16	19OCT2016	13	Entered	69	Female	20OCT16	206	MF4637	<250 mg/day	No	Yes	<250 mg/day	No	Yes	Yes	Yes	Yes
Visit 2			Normal	Abdomen	13_004	2	Yes	19OCT16	19OCT2016	13	Entered	69	Female	20OCT16	206	MF4637	<250 mg/day	No	Yes	<250 mg/day	No	Yes	Yes	Yes	Yes
Visit 2		Age spots	Abnormal	Dermatologic	13_004	2	Yes	19OCT16	19OCT2016	13	Entered	69	Female	20OCT16	206	MF4637	<250 mg/day	No	Yes	<250 mg/day	No	Yes	Yes	Yes	Yes
Visit 2			Normal	Musculoskeletal	13_004	2	Yes	19OCT16	19OCT2016	13	Entered	69	Female	20OCT16	206	MF4637	<250 mg/day	No	Yes	<250 mg/day	No	Yes	Yes	Yes	Yes
Visit 2			Normal	Circulatory	13_004	2	Yes	19OCT16	19OCT2016	13	Entered	69	Female	20OCT16	206	MF4637	<250 mg/day	No	Yes	<250 mg/day	No	Yes	Yes	Yes	Yes
Visit 2			Normal	Neurologic	13_004	2	Yes	19OCT16	19OCT2016	13	Entered	69	Female	20OCT16	206	MF4637	<250 mg/day	No	Yes	<250 mg/day	No	Yes	Yes	Yes	Yes
Visit 2			Normal	Lymphatic	13_004	2	Yes	19OCT16	19OCT2016	13	Entered	69	Female	20OCT16	206	MF4637	<250 mg/day	No	Yes	<250 mg/day	No	Yes	Yes	Yes	Yes
Visit 2			Normal	Respiratory	13_004	2	Yes	19OCT16	19OCT2016	13	Entered	69	Female	20OCT16	206	MF4637	<250 mg/day	No	Yes	<250 mg/day	No	Yes	Yes	Yes	Yes
Visit 2			Not done	Other, specify	13_004	2	Yes	19OCT16	19OCT2016	13	Entered	69	Female	20OCT16	206	MF4637	<250 mg/day	No	Yes	<250 mg/day	No	Yes	Yes	Yes	Yes
Visit 2		Obese	Abnormal	General appearance	13_005	2	Yes	09NOV16	09NOV2016	13	Entered	48	Male	10NOV16	276	MF4637	<250 mg/day	No	No	<250 mg/day	No	Yes	Yes	Yes	Yes
Visit 2			Normal	Head, eyes, ears and nose	13_005	2	Yes	09NOV16	09NOV2016	13	Entered	48	Male	10NOV16	276	MF4637	<250 mg/day	No	No	<250 mg/day	No	Yes	Yes	Yes	Yes
Visit 2			Normal	Mouth, teeth and throat	13_005	2	Yes	09NOV16	09NOV2016	13	Entered	48	Male	10NOV16	276	MF4637	<250 mg/day	No	No	<250 mg/day	No	Yes	Yes	Yes	Yes
Visit 2			Normal	Neck and thyroid	13_005	2	Yes	09NOV16	09NOV2016	13	Entered	48	Male	10NOV16	276	MF4637	<250 mg/day	No	No	<250 mg/day	No	Yes	Yes	Yes	Yes
Visit 2			Normal	Chest	13_005	2	Yes	09NOV16	09NOV2016	13	Entered	48	Male	10NOV16	276	MF4637	<250 mg/day	No	No	<250 mg/day	No	Yes	Yes	Yes	Yes
Visit 2			Normal	Heart	13_005	2	Yes	09NOV16	09NOV2016	13	Entered	48	Male	10NOV16	276	MF4637	<250 mg/day	No	No	<250 mg/day	No	Yes	Yes	Yes	Yes
Visit 2			Normal	Abdomen	13_005	2	Yes	09NOV16	09NOV2016	13	Entered	48	Male	10NOV16	276	MF4637	<250 mg/day	No	No	<250 mg/day	No	Yes	Yes	Yes	Yes
Visit 2			Normal	Dermatologic	13_005	2	Yes	09NOV16	09NOV2016	13	Entered	48	Male	10NOV16	276	MF4637	<250 mg/day	No	No	<250 mg/day	No	Yes	Yes	Yes	Yes
Visit 2			Normal	Musculoskeletal	13_005	2	Yes	09NOV16	09NOV2016	13	Entered	48	Male	10NOV16	276	MF4637	<250 mg/day	No	No	<250 mg/day	No	Yes	Yes	Yes	Yes
Visit 2			Normal	Circulatory	13_005	2	Yes	09NOV16	09NOV2016	13	Entered	48	Male	10NOV16	276	MF4637	<250 mg/day	No	No	<250 mg/day	No	Yes	Yes	Yes	Yes
Visit 2			Normal	Neurologic	13_005	2	Yes	09NOV16	09NOV2016	13	Entered	48	Male	10NOV16	276	MF4637	<250 mg/day	No	No	<250 mg/day	No	Yes	Yes	Yes	Yes
Visit 2			Normal	Lymphatic	13_005	2	Yes	09NOV16	09NOV2016	13	Entered	48	Male	10NOV16	276	MF4637	<250 mg/day	No	No	<250 mg/day	No	Yes	Yes	Yes	Yes
Visit 2			Normal	Respiratory	13_005	2	Yes	09NOV16	09NOV2016	13	Entered	48	Male	10NOV16	276	MF4637	<250 mg/day	No	No	<250 mg/day	No	Yes	Yes	Yes	Yes
Visit 2			Not done	Other, specify	13_005	2	Yes	09NOV16	09NOV2016	13	Entered	48	Male	10NOV16	276	MF4637	<250 mg/day	No	No	<250 mg/day	No	Yes	Yes	Yes	Yes
Visit 2			Normal	General appearance	13_006	2	Yes	28OCT16	28OCT2016	13	Entered	40	Male	28OCT16	160	MF4637	<250 mg/day	No	No	<250 mg/day	No	Yes	Yes	Yes	Yes
Visit 2			Normal	Head, eyes, ears and nose	13_006	2	Yes	28OCT16	28OCT2016	13	Entered	40	Male	28OCT16	160	MF4637	<250 mg/day	No	No	<250 mg/day	No	Yes	Yes	Yes	Yes
Visit 2			Normal	Mouth, teeth and throat	13_006	2	Yes	28OCT16	28OCT2016	13	Entered	40	Male	28OCT16	160	MF4637	<250 mg/day	No	No	<250 mg/day	No	Yes	Yes	Yes	Yes
Visit 2			Normal	Neck and thyroid	13_006	2	Yes	28OCT16	28OCT2016	13	Entered	40	Male	28OCT16	160	MF4637	<250 mg/day	No	No	<250 mg/day	No	Yes	Yes	Yes	Yes
Visit 2			Normal	Chest	13_006	2	Yes	28OCT16	28OCT2016	13	Entered	40	Male	28OCT16	160	MF4637	<250 mg/day	No	No	<250 mg/day	No	Yes	Yes	Yes	Yes
Visit 2			Normal	Heart	13_006	2	Yes	28OCT16	28OCT2016	13	Entered	40	Male	28OCT16	160	MF4637	<250 mg/day	No	No	<250 mg/day	No	Yes	Yes	Yes	Yes
Visit 2			Normal	Abdomen	13_006	2	Yes	28OCT16	28OCT2016	13	Entered	40	Male	28OCT16	160	MF4637	<250 mg/day	No	No	<250 mg/day	No	Yes	Yes	Yes	Yes
Visit 2			Normal	Dermatologic	13_006	2	Yes	28OCT16	28OCT2016	13	Entered	40	Male	28OCT16	160	MF4637	<250 mg/day	No	No	<250 mg/day	No	Yes	Yes	Yes	Yes
Visit 2			Normal	Musculoskeletal	13_006	2	Yes	28OCT16	28OCT2016	13	Entered	40	Male	28OCT16	160	MF4637	<250 mg/day	No	No	<250 mg/day	No	Yes	Yes	Yes	Yes
Visit 2			Normal	Circulatory	13_006	2	Yes	28OCT16	28OCT2016	13	Entered	40	Male	28OCT16	160	MF4637	<250 mg/day	No	No	<250 mg/day	No	Yes	Yes	Yes	Yes
Visit 2			Normal	Neurologic	13_006	2	Yes	28OCT16	28OCT2016	13	Entered	40	Male	28OCT16	160	MF4637	<250 mg/day	No	No	<250 mg/day	No	Yes	Yes	Yes	Yes
Visit 2			Normal	Lymphatic	13_006	2	Yes	28OCT16	28OCT2016	13	Entered	40	Male	28OCT16	160	MF4637	<250 mg/day	No	No	<250 mg/day	No	Yes	Yes	Yes	Yes
Visit 2			Normal	Respiratory	13_006	2	Yes	28OCT16	28OCT2016	13	Entered	40	Male	28OCT16	160	MF4637	<250 mg/day	No	No	<250 mg/day	No	Yes	Yes	Yes	Yes
Visit 2			Not done	Other, specify	13_006	2	Yes	28OCT16	28OCT2016	13	Entered	40	Male	28OCT16	160	MF4637	<250 mg/day	No	No	<250 mg/day	No	Yes	Yes	Yes	Yes
Visit 2		Obese	Abnormal	General appearance	13_009	2	Yes	11NOV16	11NOV2016	13	Entered	51	Male	05NOV16	267	Placebo	<250 mg/day	No	Yes	>=250 mg/day	No	Yes	Yes	Yes	Yes
Visit 2			Normal	Head, eyes, ears and nose	13_009	2	Yes	11NOV16	11NOV2016	13	Entered	51	Male	05NOV16	267	Placebo	<250 mg/day	No	Yes	>=250 mg/day	No	Yes	Yes	Yes	Yes
Visit 2			Normal	Mouth, teeth and throat	13_009	2	Yes	11NOV16	11NOV2016	13	Entered	51	Male	05NOV16	267	Placebo	<250 mg/day	No	Yes	>=250 mg/day	No	Yes	Yes	Yes	Yes
Visit 2			Normal	Neck and thyroid	13_009	2	Yes	11NOV16	11NOV2016	13	Entered	51	Male	05NOV16	267	Placebo	<250 mg/day	No	Yes	>=250 mg/day	No	Yes	Yes	Yes	Yes
Visit 2			Normal	Chest	13_009	2	Yes	11NOV16	11NOV2016	13	Entered	51	Male	05NOV16	267	Placebo	<250 mg/day	No	Yes	>=250 mg/day	No	Yes	Yes	Yes	Yes
Visit 2			Normal	Heart	13_009	2	Yes	11NOV16	11NOV2016	13	Entered	51	Male	05NOV16	267	Placebo	<250 mg/day	No	Yes	>=250 mg/day	No	Yes	Yes	Yes	Yes
Visit 2			Normal	Abdomen	13_009	2	Yes	11NOV16	11NOV2016	13	Entered	51	Male	05NOV16	267	Placebo	<250 mg/day	No	Yes	>=250 mg/day	No	Yes	Yes	Yes	Yes
Visit 2			Normal	Dermatologic	13_009	2	Yes	11NOV16	11NOV2016	13	Entered	51	Male	05NOV16	267	Placebo	<250 mg/day	No	Yes	>=250 mg/day	No	Yes	Yes	Yes	Yes
Visit 2			Normal	Musculoskeletal	13_009	2	Yes	11NOV16	11NOV2016	13	Entered	51	Male	05NOV16	267	Placebo	<250 mg/day	No	Yes	>=250 mg/day	No	Yes	Yes	Yes	Yes
Visit 2			Normal	Circulatory	13_009	2	Yes	11NOV16	11NOV2016	13	Entered	51	Male	05NOV16	267	Placebo	<250 mg/day	No	Yes	>=250 mg/day	No	Yes	Yes	Yes	Yes
Visit 2			Normal	Neurologic	13_009	2	Yes	11NOV16	11NOV2016	13	Entered	51	Male	05NOV16	267	Placebo	<250 mg/day	No	Yes	>=250 mg/day	No	Yes	Yes	Yes	Yes
Visit 2			Normal	Lymphatic	13_009	2	Yes	11NOV16	11NOV2016	13	Entered	51	Male	05NOV16	267	Placebo	<250 mg/day	No	Yes	>=250 mg/day	No	Yes	Yes	Yes	Yes
Visit 2			Normal	Respiratory	13_009	2	Yes	11NOV16	11NOV2016	13	Entered	51	Male	05NOV16	267	Placebo	<250 mg/day	No	Yes	>=250 mg/day	No	Yes	Yes	Yes	Yes
Visit 2			Not done	Other, specify	13_009	2	Yes	11NOV16	11NOV2016	13	Entered	51	Male	05NOV16	267	Placebo	<250 mg/day	No	Yes	>=250 mg/day	No	Yes	Yes	Yes	Yes
Visit 2			Normal	General appearance	13_011	2	Yes	28OCT16	28OCT2016	13	Entered	43	Male	28OCT16	207	Placebo	<250 mg/day	No	No	<250 mg/day	No	Yes	Yes	Yes	Yes
Visit 2			Normal	Head, eyes, ears and nose	13_011	2	Yes	28OCT16	28OCT2016	13	Entered	43	Male	28OCT16	207	Placebo	<250 mg/day	No	No	<250 mg/day	No	Yes	Yes	Yes	Yes
Visit 2			Normal	Mouth, teeth and throat	13_011	2	Yes	28OCT16	28OCT2016	13	Entered	43	Male	28OCT16	207	Placebo	<250 mg/day	No	No	<250 mg/day	No	Yes	Yes	Yes	Yes
Visit 2			Normal	Neck and thyroid	13_011	2	Yes	28OCT16	28OCT2016	13	Entered	43	Male	28OCT16	207	Placebo	<250 mg/day	No	No	<250 mg/day	No	Yes	Yes	Yes	Yes
Visit 2			Normal	Chest	13_011	2	Yes	28OCT16	28OCT2016	13	Entered	43	Male	28OCT16	207	Placebo	<250 mg/day	No	No	<250 mg/day	No	Yes	Yes	Yes	Yes
Visit 2			Normal	Heart	13_011	2	Yes	28OCT16	28OCT2016	13	Entered	43	Male	28OCT16	207	Placebo	<250 mg/day	No	No	<250 mg/day	No	Yes	Yes	Yes	Yes
Visit 2			Normal	Abdomen	13_011	2	Yes	28OCT16	28OCT2016	13	Entered	43	Male	28OCT16	207	Placebo	<250 mg/day	No	No	<250 mg/day	No	Yes	Yes	Yes	Yes
Visit 2			Normal	Dermatologic	13_011	2	Yes	28OCT16	28OCT2016	13	Entered	43	Male	28OCT16	207	Placebo	<250 mg/day	No	No	<250 mg/day	No	Yes	Yes	Yes	Yes
Visit 2			Normal	Musculoskeletal	13_011	2	Yes	28OCT16	28OCT2016	13	Entered	43	Male	28OCT16	207	Placebo	<250 mg/day	No	No	<250 mg/day	No	Yes	Yes	Yes	Yes
Visit 2			Normal	Circulatory	13_011	2	Yes	28OCT16	28OCT2016	13	Entered	43	Male	28OCT16	207	Placebo	<250 mg/day	No	No	<250 mg/day	No	Yes	Yes	Yes	Yes
Visit 2			Normal	Neurologic	13_011	2	Yes	28OCT16	28OCT2016	13	Entered	43	Male	28OCT16	207	Placebo	<250 mg/day	No	No	<250 mg/day	No	Yes	Yes	Yes	Yes
Visit 2			Normal	Lymphatic	13_011	2	Yes	28OCT16	28OCT2016	13	Entered	43	Male	28OCT16	207	Placebo	<250 mg/day	No	No	<250 mg/day	No	Yes	Yes	Yes	Yes
Visit 2			Normal	Respiratory	13_011	2	Yes	28OCT16	28OCT2016	13	Entered	43	Male	28OCT16	207	Placebo	<250 mg/day	No	No	<250 mg/day	No	Yes	Yes	Yes	Yes
Visit 2			Not done	Other, specify	13_011	2	Yes	28OCT16	28OCT2016	13	Entered	43	Male	28OCT16	207	Placebo	<250 mg/day	No	No	<250 mg/day	No	Yes	Yes	Yes	Yes
Visit 2		Obese	Abnormal	General appearance	13_013	2	Yes	28OCT16	28OCT2016	13	Entered	46	Male	28OCT16	161	MF4637	<250 mg/day	No	No	>=250 mg/day	No	Yes	Yes	Yes	Yes
Visit 2			Normal	Head, eyes, ears and nose	13_013	2	Yes	28OCT16	28OCT2016	13	Entered	46	Male	28OCT16	161	MF4637	<250 mg/day	No	No	>=250 mg/day	No	Yes	Yes	Yes	Yes
Visit 2			Normal	Mouth, teeth and throat	13_013	2	Yes	28OCT16	28OCT2016	13	Entered	46	Male	28OCT16	161	MF4637	<250 mg/day	No	No	>=250 mg/day	No	Yes	Yes	Yes	Yes
Visit 2			Normal	Neck and thyroid	13_013	2	Yes	28OCT16	28OCT2016	13	Entered	46	Male	28OCT16	161	MF4637	<250 mg/day	No	No	>=250 mg/day	No	Yes	Yes	Yes	Yes
Visit 2			Normal	Chest	13_013	2	Yes	28OCT16	28OCT2016	13	Entered	46	Male	28OCT16	161	MF4637	<250 mg/day	No	No	>=250 mg/day	No	Yes	Yes	Yes	Yes
Visit 2			Normal	Heart	13_013	2	Yes	28OCT16	28OCT2016	13	Entered	46	Male	28OCT16	161	MF4637	<250 mg/day	No	No	>=250 mg/day	No	Yes	Yes	Yes	Yes
Visit 2			Normal	Abdomen	13_013	2	Yes	28OCT16	28OCT2016	13	Entered	46	Male	28OCT16	161	MF4637	<250 mg/day	No	No	>=250 mg/day	No	Yes	Yes	Yes	Yes
Visit 2			Normal	Dermatologic	13_013	2	Yes	28OCT16	28OCT2016	13	Entered	46	Male	28OCT16	161	MF4637	<250 mg/day	No	No	>=250 mg/day	No	Yes	Yes	Yes	Yes
Visit 2			Normal	Musculoskeletal	13_013	2	Yes	28OCT16	28OCT2016	13	Entered	46	Male	28OCT16	161	MF4637	<250 mg/day	No	No	>=250 mg/day	No	Yes	Yes	Yes	Yes
Visit 2			Normal	Circulatory	13_013	2	Yes	28OCT16	28OCT2016	13	Entered	46	Male	28OCT16	161	MF4637	<250 mg/day	No	No	>=250 mg/day	No	Yes	Yes	Yes	Yes
Visit 2			Normal	Neurologic	13_013	2	Yes	28OCT16	28OCT2016	13	Entered	46	Male	28OCT16	161	MF4637	<250 mg/day	No	No	>=250 mg/day	No	Yes	Yes	Yes	Yes
Visit 2			Normal	Lymphatic	13_013	2	Yes	28OCT16	28OCT2016	13	Entered	46	Male	28OCT16	161	MF4637	<250 mg/day	No	No	>=250 mg/day	No	Yes	Yes	Yes	Yes
Visit 2			Normal	Respiratory	13_013	2	Yes	28OCT16	28OCT2016	13	Entered	46	Male	28OCT16	161	MF4637	<250 mg/day	No	No	>=250 mg/day	No	Yes	Yes	Yes	Yes
Visit 2			Not done	Other, specify	13_013	2	Yes	28OCT16	28OCT2016	13	Entered	46	Male	28OCT16	161	MF4637	<250 mg/day	No	No	>=250 mg/day	No	Yes	Yes	Yes	Yes
Visit 2			Normal	General appearance	13_014	2	Yes	03NOV16	03NOV2016	13	Entered	71	Female	03NOV16	266	Placebo	<250 mg/day	No	Yes	<250 mg/day	No	Yes	Yes	Yes	Yes
Visit 2			Normal	Head, eyes, ears and nose	13_014	2	Yes	03NOV16	03NOV2016	13	Entered	71	Female	03NOV16	266	Placebo	<250 mg/day	No	Yes	<250 mg/day	No	Yes	Yes	Yes	Yes
Visit 2			Normal	Mouth, teeth and throat	13_014	2	Yes	03NOV16	03NOV2016	13	Entered	71	Female	03NOV16	266	Placebo	<250 mg/day	No	Yes	<250 mg/day	No	Yes	Yes	Yes	Yes
Visit 2			Normal	Neck and thyroid	13_014	2	Yes	03NOV16	03NOV2016	13	Entered	71	Female	03NOV16	266	Placebo	<250 mg/day	No	Yes	<250 mg/day	No	Yes	Yes	Yes	Yes
Visit 2			Normal	Chest	13_014	2	Yes	03NOV16	03NOV2016	13	Entered	71	Female	03NOV16	266	Placebo	<250 mg/day	No	Yes	<250 mg/day	No	Yes	Yes	Yes	Yes
Visit 2			Normal	Heart	13_014	2	Yes	03NOV16	03NOV2016	13	Entered	71	Female	03NOV16	266	Placebo	<250 mg/day	No	Yes	<250 mg/day	No	Yes	Yes	Yes	Yes
Visit 2			Normal	Abdomen	13_014	2	Yes	03NOV16	03NOV2016	13	Entered	71	Female	03NOV16	266	Placebo	<250 mg/day	No	Yes	<250 mg/day	No	Yes	Yes	Yes	Yes
Visit 2			Normal	Dermatologic	13_014	2	Yes	03NOV16	03NOV2016	13	Entered	71	Female	03NOV16	266	Placebo	<250 mg/day	No	Yes	<250 mg/day	No	Yes	Yes	Yes	Yes
Visit 2			Normal	Musculoskeletal	13_014	2	Yes	03NOV16	03NOV2016	13	Entered	71	Female	03NOV16	266	Placebo	<250 mg/day	No	Yes	<250 mg/day	No	Yes	Yes	Yes	Yes
Visit 2			Normal	Circulatory	13_014	2	Yes	03NOV16	03NOV2016	13	Entered	71	Female	03NOV16	266	Placebo	<250 mg/day	No	Yes	<250 mg/day	No	Yes	Yes	Yes	Yes
Visit 2			Normal	Neurologic	13_014	2	Yes	03NOV16	03NOV2016	13	Entered	71	Female	03NOV16	266	Placebo	<250 mg/day	No	Yes	<250 mg/day	No	Yes	Yes	Yes	Yes
Visit 2			Normal	Lymphatic	13_014	2	Yes	03NOV16	03NOV2016	13	Entered	71	Female	03NOV16	266	Placebo	<250 mg/day	No	Yes	<250 mg/day	No	Yes	Yes	Yes	Yes
Visit 2			Normal	Respiratory	13_014	2	Yes	03NOV16	03NOV2016	13	Entered	71	Female	03NOV16	266	Placebo	<250 mg/day	No	Yes	<250 mg/day	No	Yes	Yes	Yes	Yes
Visit 2	Skin	Age spots	Abnormal	Other, specify	13_014	2	Yes	03NOV16	03NOV2016	13	Entered	71	Female	03NOV16	266	Placebo	<250 mg/day	No	Yes	<250 mg/day	No	Yes	Yes	Yes	Yes
Visit 2			Normal	General appearance	13_015	2	Yes	03NOV16	03NOV2016	13	Entered	75	Male	03NOV16	264	MF4637	<250 mg/day	No	Yes	<250 mg/day	No	Yes	Yes	Yes	Yes
Visit 2			Normal	Head, eyes, ears and nose	13_015	2	Yes	03NOV16	03NOV2016	13	Entered	75	Male	03NOV16	264	MF4637	<250 mg/day	No	Yes	<250 mg/day	No	Yes	Yes	Yes	Yes
Visit 2			Normal	Mouth, teeth and throat	13_015	2	Yes	03NOV16	03NOV2016	13	Entered	75	Male	03NOV16	264	MF4637	<250 mg/day	No	Yes	<250 mg/day	No	Yes	Yes	Yes	Yes
Visit 2			Normal	Neck and thyroid	13_015	2	Yes	03NOV16	03NOV2016	13	Entered	75	Male	03NOV16	264	MF4637	<250 mg/day	No	Yes	<250 mg/day	No	Yes	Yes	Yes	Yes
Visit 2			Normal	Chest	13_015	2	Yes	03NOV16	03NOV2016	13	Entered	75	Male	03NOV16	264	MF4637	<250 mg/day	No	Yes	<250 mg/day	No	Yes	Yes	Yes	Yes
Visit 2			Normal	Heart	13_015	2	Yes	03NOV16	03NOV2016	13	Entered	75	Male	03NOV16	264	MF4637	<250 mg/day	No	Yes	<250 mg/day	No	Yes	Yes	Yes	Yes
Visit 2			Normal	Abdomen	13_015	2	Yes	03NOV16	03NOV2016	13	Entered	75	Male	03NOV16	264	MF4637	<250 mg/day	No	Yes	<250 mg/day	No	Yes	Yes	Yes	Yes
Visit 2			Normal	Dermatologic	13_015	2	Yes	03NOV16	03NOV2016	13	Entered	75	Male	03NOV16	264	MF4637	<250 mg/day	No	Yes	<250 mg/day	No	Yes	Yes	Yes	Yes
Visit 2			Normal	Musculoskeletal	13_015	2	Yes	03NOV16	03NOV2016	13	Entered	75	Male	03NOV16	264	MF4637	<250 mg/day	No	Yes	<250 mg/day	No	Yes	Yes	Yes	Yes
Visit 2			Normal	Circulatory	13_015	2	Yes	03NOV16	03NOV2016	13	Entered	75	Male	03NOV16	264	MF4637	<250 mg/day	No	Yes	<250 mg/day	No	Yes	Yes	Yes	Yes
Visit 2			Normal	Neurologic	13_015	2	Yes	03NOV16	03NOV2016	13	Entered	75	Male	03NOV16	264	MF4637	<250 mg/day	No	Yes	<250 mg/day	No	Yes	Yes	Yes	Yes
Visit 2			Normal	Lymphatic	13_015	2	Yes	03NOV16	03NOV2016	13	Entered	75	Male	03NOV16	264	MF4637	<250 mg/day	No	Yes	<250 mg/day	No	Yes	Yes	Yes	Yes
Visit 2			Normal	Respiratory	13_015	2	Yes	03NOV16	03NOV2016	13	Entered	75	Male	03NOV16	264	MF4637	<250 mg/day	No	Yes	<250 mg/day	No	Yes	Yes	Yes	Yes
Visit 2	Skin	Age spots	Abnormal	Other, specify	13_015	2	Yes	03NOV16	03NOV2016	13	Entered	75	Male	03NOV16	264	MF4637	<250 mg/day	No	Yes	<250 mg/day	No	Yes	Yes	Yes	Yes
Visit 2			Normal	General appearance	13_016	2	Yes	27OCT16	27OCT2016	13	Entered	70	Female	28OCT16	163	Placebo	<250 mg/day	No	Yes	>=250 mg/day	No	Yes	Yes	Yes	Yes
Visit 2			Normal	Head, eyes, ears and nose	13_016	2	Yes	27OCT16	27OCT2016	13	Entered	70	Female	28OCT16	163	Placebo	<250 mg/day	No	Yes	>=250 mg/day	No	Yes	Yes	Yes	Yes
Visit 2			Normal	Mouth, teeth and throat	13_016	2	Yes	27OCT16	27OCT2016	13	Entered	70	Female	28OCT16	163	Placebo	<250 mg/day	No	Yes	>=250 mg/day	No	Yes	Yes	Yes	Yes
Visit 2			Normal	Neck and thyroid	13_016	2	Yes	27OCT16	27OCT2016	13	Entered	70	Female	28OCT16	163	Placebo	<250 mg/day	No	Yes	>=250 mg/day	No	Yes	Yes	Yes	Yes
Visit 2			Normal	Chest	13_016	2	Yes	27OCT16	27OCT2016	13	Entered	70	Female	28OCT16	163	Placebo	<250 mg/day	No	Yes	>=250 mg/day	No	Yes	Yes	Yes	Yes
Visit 2			Normal	Heart	13_016	2	Yes	27OCT16	27OCT2016	13	Entered	70	Female	28OCT16	163	Placebo	<250 mg/day	No	Yes	>=250 mg/day	No	Yes	Yes	Yes	Yes
Visit 2			Normal	Abdomen	13_016	2	Yes	27OCT16	27OCT2016	13	Entered	70	Female	28OCT16	163	Placebo	<250 mg/day	No	Yes	>=250 mg/day	No	Yes	Yes	Yes	Yes
Visit 2			Normal	Dermatologic	13_016	2	Yes	27OCT16	27OCT2016	13	Entered	70	Female	28OCT16	163	Placebo	<250 mg/day	No	Yes	>=250 mg/day	No	Yes	Yes	Yes	Yes
Visit 2			Normal	Musculoskeletal	13_016	2	Yes	27OCT16	27OCT2016	13	Entered	70	Female	28OCT16	163	Placebo	<250 mg/day	No	Yes	>=250 mg/day	No	Yes	Yes	Yes	Yes
Visit 2			Normal	Circulatory	13_016	2	Yes	27OCT16	27OCT2016	13	Entered	70	Female	28OCT16	163	Placebo	<250 mg/day	No	Yes	>=250 mg/day	No	Yes	Yes	Yes	Yes
Visit 2			Normal	Neurologic	13_016	2	Yes	27OCT16	27OCT2016	13	Entered	70	Female	28OCT16	163	Placebo	<250 mg/day	No	Yes	>=250 mg/day	No	Yes	Yes	Yes	Yes
Visit 2			Normal	Lymphatic	13_016	2	Yes	27OCT16	27OCT2016	13	Entered	70	Female	28OCT16	163	Placebo	<250 mg/day	No	Yes	>=250 mg/day	No	Yes	Yes	Yes	Yes
Visit 2			Normal	Respiratory	13_016	2	Yes	27OCT16	27OCT2016	13	Entered	70	Female	28OCT16	163	Placebo	<250 mg/day	No	Yes	>=250 mg/day	No	Yes	Yes	Yes	Yes
Visit 2	Skin	Age spots	Abnormal	Other, specify	13_016	2	Yes	27OCT16	27OCT2016	13	Entered	70	Female	28OCT16	163	Placebo	<250 mg/day	No	Yes	>=250 mg/day	No	Yes	Yes	Yes	Yes
Visit 2		Obese	Abnormal	General appearance	13_017	2	Yes	03NOV16	03NOV2016	13	Entered	52	Female	03NOV16	265	MF4637	<250 mg/day	Yes	Yes	>=250 mg/day	No	Yes	Yes	Yes	Yes
Visit 2			Normal	Head, eyes, ears and nose	13_017	2	Yes	03NOV16	03NOV2016	13	Entered	52	Female	03NOV16	265	MF4637	<250 mg/day	Yes	Yes	>=250 mg/day	No	Yes	Yes	Yes	Yes
Visit 2			Normal	Mouth, teeth and throat	13_017	2	Yes	03NOV16	03NOV2016	13	Entered	52	Female	03NOV16	265	MF4637	<250 mg/day	Yes	Yes	>=250 mg/day	No	Yes	Yes	Yes	Yes
Visit 2			Normal	Neck and thyroid	13_017	2	Yes	03NOV16	03NOV2016	13	Entered	52	Female	03NOV16	265	MF4637	<250 mg/day	Yes	Yes	>=250 mg/day	No	Yes	Yes	Yes	Yes
Visit 2			Normal	Chest	13_017	2	Yes	03NOV16	03NOV2016	13	Entered	52	Female	03NOV16	265	MF4637	<250 mg/day	Yes	Yes	>=250 mg/day	No	Yes	Yes	Yes	Yes
Visit 2			Normal	Heart	13_017	2	Yes	03NOV16	03NOV2016	13	Entered	52	Female	03NOV16	265	MF4637	<250 mg/day	Yes	Yes	>=250 mg/day	No	Yes	Yes	Yes	Yes
Visit 2			Normal	Abdomen	13_017	2	Yes	03NOV16	03NOV2016	13	Entered	52	Female	03NOV16	265	MF4637	<250 mg/day	Yes	Yes	>=250 mg/day	No	Yes	Yes	Yes	Yes
Visit 2			Normal	Dermatologic	13_017	2	Yes	03NOV16	03NOV2016	13	Entered	52	Female	03NOV16	265	MF4637	<250 mg/day	Yes	Yes	>=250 mg/day	No	Yes	Yes	Yes	Yes
Visit 2			Normal	Musculoskeletal	13_017	2	Yes	03NOV16	03NOV2016	13	Entered	52	Female	03NOV16	265	MF4637	<250 mg/day	Yes	Yes	>=250 mg/day	No	Yes	Yes	Yes	Yes
Visit 2			Normal	Circulatory	13_017	2	Yes	03NOV16	03NOV2016	13	Entered	52	Female	03NOV16	265	MF4637	<250 mg/day	Yes	Yes	>=250 mg/day	No	Yes	Yes	Yes	Yes
Visit 2			Normal	Neurologic	13_017	2	Yes	03NOV16	03NOV2016	13	Entered	52	Female	03NOV16	265	MF4637	<250 mg/day	Yes	Yes	>=250 mg/day	No	Yes	Yes	Yes	Yes
Visit 2			Normal	Lymphatic	13_017	2	Yes	03NOV16	03NOV2016	13	Entered	52	Female	03NOV16	265	MF4637	<250 mg/day	Yes	Yes	>=250 mg/day	No	Yes	Yes	Yes	Yes
Visit 2			Normal	Respiratory	13_017	2	Yes	03NOV16	03NOV2016	13	Entered	52	Female	03NOV16	265	MF4637	<250 mg/day	Yes	Yes	>=250 mg/day	No	Yes	Yes	Yes	Yes
Visit 2			Not done	Other, specify	13_017	2	Yes	03NOV16	03NOV2016	13	Entered	52	Female	03NOV16	265	MF4637	<250 mg/day	Yes	Yes	>=250 mg/day	No	Yes	Yes	Yes	Yes
Visit 2		Obese	Abnormal	General appearance	13_019	2	Yes	22NOV16	22NOV2016	13	Entered	47	Female	23NOV16	278	Placebo	<250 mg/day	No	No	<250 mg/day	No	Yes	Yes	Yes	Yes
Visit 2			Normal	Head, eyes, ears and nose	13_019	2	Yes	22NOV16	22NOV2016	13	Entered	47	Female	23NOV16	278	Placebo	<250 mg/day	No	No	<250 mg/day	No	Yes	Yes	Yes	Yes
Visit 2			Normal	Mouth, teeth and throat	13_019	2	Yes	22NOV16	22NOV2016	13	Entered	47	Female	23NOV16	278	Placebo	<250 mg/day	No	No	<250 mg/day	No	Yes	Yes	Yes	Yes
Visit 2			Normal	Neck and thyroid	13_019	2	Yes	22NOV16	22NOV2016	13	Entered	47	Female	23NOV16	278	Placebo	<250 mg/day	No	No	<250 mg/day	No	Yes	Yes	Yes	Yes
Visit 2			Normal	Chest	13_019	2	Yes	22NOV16	22NOV2016	13	Entered	47	Female	23NOV16	278	Placebo	<250 mg/day	No	No	<250 mg/day	No	Yes	Yes	Yes	Yes
Visit 2			Normal	Heart	13_019	2	Yes	22NOV16	22NOV2016	13	Entered	47	Female	23NOV16	278	Placebo	<250 mg/day	No	No	<250 mg/day	No	Yes	Yes	Yes	Yes
Visit 2			Normal	Abdomen	13_019	2	Yes	22NOV16	22NOV2016	13	Entered	47	Female	23NOV16	278	Placebo	<250 mg/day	No	No	<250 mg/day	No	Yes	Yes	Yes	Yes
Visit 2			Normal	Dermatologic	13_019	2	Yes	22NOV16	22NOV2016	13	Entered	47	Female	23NOV16	278	Placebo	<250 mg/day	No	No	<250 mg/day	No	Yes	Yes	Yes	Yes
Visit 2			Normal	Musculoskeletal	13_019	2	Yes	22NOV16	22NOV2016	13	Entered	47	Female	23NOV16	278	Placebo	<250 mg/day	No	No	<250 mg/day	No	Yes	Yes	Yes	Yes
Visit 2			Normal	Circulatory	13_019	2	Yes	22NOV16	22NOV2016	13	Entered	47	Female	23NOV16	278	Placebo	<250 mg/day	No	No	<250 mg/day	No	Yes	Yes	Yes	Yes
Visit 2			Normal	Neurologic	13_019	2	Yes	22NOV16	22NOV2016	13	Entered	47	Female	23NOV16	278	Placebo	<250 mg/day	No	No	<250 mg/day	No	Yes	Yes	Yes	Yes
Visit 2			Normal	Lymphatic	13_019	2	Yes	22NOV16	22NOV2016	13	Entered	47	Female	23NOV16	278	Placebo	<250 mg/day	No	No	<250 mg/day	No	Yes	Yes	Yes	Yes
Visit 2			Normal	Respiratory	13_019	2	Yes	22NOV16	22NOV2016	13	Entered	47	Female	23NOV16	278	Placebo	<250 mg/day	No	No	<250 mg/day	No	Yes	Yes	Yes	Yes
Visit 2			Not done	Other, specify	13_019	2	Yes	22NOV16	22NOV2016	13	Entered	47	Female	23NOV16	278	Placebo	<250 mg/day	No	No	<250 mg/day	No	Yes	Yes	Yes	Yes
Visit 2		Obese	Abnormal	General appearance	13_020	2	Yes	17NOV16	17NOV2016	13	Entered	55	Male	17NOV16	277	Placebo	<250 mg/day	No	No	<250 mg/day	No	Yes	Yes	Yes	Yes
Visit 2			Normal	Head, eyes, ears and nose	13_020	2	Yes	17NOV16	17NOV2016	13	Entered	55	Male	17NOV16	277	Placebo	<250 mg/day	No	No	<250 mg/day	No	Yes	Yes	Yes	Yes
Visit 2			Normal	Mouth, teeth and throat	13_020	2	Yes	17NOV16	17NOV2016	13	Entered	55	Male	17NOV16	277	Placebo	<250 mg/day	No	No	<250 mg/day	No	Yes	Yes	Yes	Yes
Visit 2			Normal	Neck and thyroid	13_020	2	Yes	17NOV16	17NOV2016	13	Entered	55	Male	17NOV16	277	Placebo	<250 mg/day	No	No	<250 mg/day	No	Yes	Yes	Yes	Yes
Visit 2			Normal	Chest	13_020	2	Yes	17NOV16	17NOV2016	13	Entered	55	Male	17NOV16	277	Placebo	<250 mg/day	No	No	<250 mg/day	No	Yes	Yes	Yes	Yes
Visit 2			Normal	Heart	13_020	2	Yes	17NOV16	17NOV2016	13	Entered	55	Male	17NOV16	277	Placebo	<250 mg/day	No	No	<250 mg/day	No	Yes	Yes	Yes	Yes
Visit 2			Normal	Abdomen	13_020	2	Yes	17NOV16	17NOV2016	13	Entered	55	Male	17NOV16	277	Placebo	<250 mg/day	No	No	<250 mg/day	No	Yes	Yes	Yes	Yes
Visit 2			Normal	Dermatologic	13_020	2	Yes	17NOV16	17NOV2016	13	Entered	55	Male	17NOV16	277	Placebo	<250 mg/day	No	No	<250 mg/day	No	Yes	Yes	Yes	Yes
Visit 2			Normal	Musculoskeletal	13_020	2	Yes	17NOV16	17NOV2016	13	Entered	55	Male	17NOV16	277	Placebo	<250 mg/day	No	No	<250 mg/day	No	Yes	Yes	Yes	Yes
Visit 2			Normal	Circulatory	13_020	2	Yes	17NOV16	17NOV2016	13	Entered	55	Male	17NOV16	277	Placebo	<250 mg/day	No	No	<250 mg/day	No	Yes	Yes	Yes	Yes
Visit 2			Normal	Neurologic	13_020	2	Yes	17NOV16	17NOV2016	13	Entered	55	Male	17NOV16	277	Placebo	<250 mg/day	No	No	<250 mg/day	No	Yes	Yes	Yes	Yes
Visit 2			Normal	Lymphatic	13_020	2	Yes	17NOV16	17NOV2016	13	Entered	55	Male	17NOV16	277	Placebo	<250 mg/day	No	No	<250 mg/day	No	Yes	Yes	Yes	Yes
Visit 2			Normal	Respiratory	13_020	2	Yes	17NOV16	17NOV2016	13	Entered	55	Male	17NOV16	277	Placebo	<250 mg/day	No	No	<250 mg/day	No	Yes	Yes	Yes	Yes
Visit 2			Not done	Other, specify	13_020	2	Yes	17NOV16	17NOV2016	13	Entered	55	Male	17NOV16	277	Placebo	<250 mg/day	No	No	<250 mg/day	No	Yes	Yes	Yes	Yes
Visit 2			Normal	General appearance	14_001	2	Yes	25OCT16	25OCT2016	14	Entered	61	Male	25OCT16	185	Placebo	>=250 mg/day	No	Yes	>=250 mg/day	No	Yes	Yes	Yes	Yes
Visit 2			Normal	Head, eyes, ears and nose	14_001	2	Yes	25OCT16	25OCT2016	14	Entered	61	Male	25OCT16	185	Placebo	>=250 mg/day	No	Yes	>=250 mg/day	No	Yes	Yes	Yes	Yes
Visit 2			Normal	Mouth, teeth and throat	14_001	2	Yes	25OCT16	25OCT2016	14	Entered	61	Male	25OCT16	185	Placebo	>=250 mg/day	No	Yes	>=250 mg/day	No	Yes	Yes	Yes	Yes
Visit 2			Normal	Neck and thyroid	14_001	2	Yes	25OCT16	25OCT2016	14	Entered	61	Male	25OCT16	185	Placebo	>=250 mg/day	No	Yes	>=250 mg/day	No	Yes	Yes	Yes	Yes
Visit 2			Normal	Chest	14_001	2	Yes	25OCT16	25OCT2016	14	Entered	61	Male	25OCT16	185	Placebo	>=250 mg/day	No	Yes	>=250 mg/day	No	Yes	Yes	Yes	Yes
Visit 2			Normal	Heart	14_001	2	Yes	25OCT16	25OCT2016	14	Entered	61	Male	25OCT16	185	Placebo	>=250 mg/day	No	Yes	>=250 mg/day	No	Yes	Yes	Yes	Yes
Visit 2			Normal	Abdomen	14_001	2	Yes	25OCT16	25OCT2016	14	Entered	61	Male	25OCT16	185	Placebo	>=250 mg/day	No	Yes	>=250 mg/day	No	Yes	Yes	Yes	Yes
Visit 2			Normal	Dermatologic	14_001	2	Yes	25OCT16	25OCT2016	14	Entered	61	Male	25OCT16	185	Placebo	>=250 mg/day	No	Yes	>=250 mg/day	No	Yes	Yes	Yes	Yes
Visit 2			Normal	Musculoskeletal	14_001	2	Yes	25OCT16	25OCT2016	14	Entered	61	Male	25OCT16	185	Placebo	>=250 mg/day	No	Yes	>=250 mg/day	No	Yes	Yes	Yes	Yes
Visit 2			Normal	Circulatory	14_001	2	Yes	25OCT16	25OCT2016	14	Entered	61	Male	25OCT16	185	Placebo	>=250 mg/day	No	Yes	>=250 mg/day	No	Yes	Yes	Yes	Yes
Visit 2			Normal	Neurologic	14_001	2	Yes	25OCT16	25OCT2016	14	Entered	61	Male	25OCT16	185	Placebo	>=250 mg/day	No	Yes	>=250 mg/day	No	Yes	Yes	Yes	Yes
Visit 2			Normal	Lymphatic	14_001	2	Yes	25OCT16	25OCT2016	14	Entered	61	Male	25OCT16	185	Placebo	>=250 mg/day	No	Yes	>=250 mg/day	No	Yes	Yes	Yes	Yes
Visit 2			Normal	Respiratory	14_001	2	Yes	25OCT16	25OCT2016	14	Entered	61	Male	25OCT16	185	Placebo	>=250 mg/day	No	Yes	>=250 mg/day	No	Yes	Yes	Yes	Yes
Visit 2			Not done	Other, specify	14_001	2	Yes	25OCT16	25OCT2016	14	Entered	61	Male	25OCT16	185	Placebo	>=250 mg/day	No	Yes	>=250 mg/day	No	Yes	Yes	Yes	Yes
Visit 2			Normal	General appearance	14_002	2	Yes	12OCT16	12OCT2016	14	Entered	44	Female	12OCT16	208	MF4637	<250 mg/day	No	Yes	>=250 mg/day	No	Yes	Yes	Yes	Yes
Visit 2			Normal	Head, eyes, ears and nose	14_002	2	Yes	12OCT16	12OCT2016	14	Entered	44	Female	12OCT16	208	MF4637	<250 mg/day	No	Yes	>=250 mg/day	No	Yes	Yes	Yes	Yes
Visit 2			Normal	Mouth, teeth and throat	14_002	2	Yes	12OCT16	12OCT2016	14	Entered	44	Female	12OCT16	208	MF4637	<250 mg/day	No	Yes	>=250 mg/day	No	Yes	Yes	Yes	Yes
Visit 2			Normal	Neck and thyroid	14_002	2	Yes	12OCT16	12OCT2016	14	Entered	44	Female	12OCT16	208	MF4637	<250 mg/day	No	Yes	>=250 mg/day	No	Yes	Yes	Yes	Yes
Visit 2			Normal	Chest	14_002	2	Yes	12OCT16	12OCT2016	14	Entered	44	Female	12OCT16	208	MF4637	<250 mg/day	No	Yes	>=250 mg/day	No	Yes	Yes	Yes	Yes
Visit 2			Normal	Heart	14_002	2	Yes	12OCT16	12OCT2016	14	Entered	44	Female	12OCT16	208	MF4637	<250 mg/day	No	Yes	>=250 mg/day	No	Yes	Yes	Yes	Yes
Visit 2			Normal	Abdomen	14_002	2	Yes	12OCT16	12OCT2016	14	Entered	44	Female	12OCT16	208	MF4637	<250 mg/day	No	Yes	>=250 mg/day	No	Yes	Yes	Yes	Yes
Visit 2			Normal	Dermatologic	14_002	2	Yes	12OCT16	12OCT2016	14	Entered	44	Female	12OCT16	208	MF4637	<250 mg/day	No	Yes	>=250 mg/day	No	Yes	Yes	Yes	Yes
Visit 2			Normal	Musculoskeletal	14_002	2	Yes	12OCT16	12OCT2016	14	Entered	44	Female	12OCT16	208	MF4637	<250 mg/day	No	Yes	>=250 mg/day	No	Yes	Yes	Yes	Yes
Visit 2			Normal	Circulatory	14_002	2	Yes	12OCT16	12OCT2016	14	Entered	44	Female	12OCT16	208	MF4637	<250 mg/day	No	Yes	>=250 mg/day	No	Yes	Yes	Yes	Yes
Visit 2			Normal	Neurologic	14_002	2	Yes	12OCT16	12OCT2016	14	Entered	44	Female	12OCT16	208	MF4637	<250 mg/day	No	Yes	>=250 mg/day	No	Yes	Yes	Yes	Yes
Visit 2			Normal	Lymphatic	14_002	2	Yes	12OCT16	12OCT2016	14	Entered	44	Female	12OCT16	208	MF4637	<250 mg/day	No	Yes	>=250 mg/day	No	Yes	Yes	Yes	Yes
Visit 2			Normal	Respiratory	14_002	2	Yes	12OCT16	12OCT2016	14	Entered	44	Female	12OCT16	208	MF4637	<250 mg/day	No	Yes	>=250 mg/day	No	Yes	Yes	Yes	Yes
Visit 2			Not done	Other, specify	14_002	2	Yes	12OCT16	12OCT2016	14	Entered	44	Female	12OCT16	208	MF4637	<250 mg/day	No	Yes	>=250 mg/day	No	Yes	Yes	Yes	Yes
Visit 2			Normal	General appearance	14_010	2	Yes	03NOV16	03NOV2016	14	Early Termination	61	Female		184	MF4637	<250 mg/day	No	No	>=250 mg/day	No	No	Yes	No	No
Visit 2			Normal	Head, eyes, ears and nose	14_010	2	Yes	03NOV16	03NOV2016	14	Early Termination	61	Female		184	MF4637	<250 mg/day	No	No	>=250 mg/day	No	No	Yes	No	No
Visit 2			Normal	Mouth, teeth and throat	14_010	2	Yes	03NOV16	03NOV2016	14	Early Termination	61	Female		184	MF4637	<250 mg/day	No	No	>=250 mg/day	No	No	Yes	No	No
Visit 2			Normal	Neck and thyroid	14_010	2	Yes	03NOV16	03NOV2016	14	Early Termination	61	Female		184	MF4637	<250 mg/day	No	No	>=250 mg/day	No	No	Yes	No	No
Visit 2			Normal	Chest	14_010	2	Yes	03NOV16	03NOV2016	14	Early Termination	61	Female		184	MF4637	<250 mg/day	No	No	>=250 mg/day	No	No	Yes	No	No
Visit 2			Normal	Heart	14_010	2	Yes	03NOV16	03NOV2016	14	Early Termination	61	Female		184	MF4637	<250 mg/day	No	No	>=250 mg/day	No	No	Yes	No	No
Visit 2			Normal	Abdomen	14_010	2	Yes	03NOV16	03NOV2016	14	Early Termination	61	Female		184	MF4637	<250 mg/day	No	No	>=250 mg/day	No	No	Yes	No	No
Visit 2			Normal	Dermatologic	14_010	2	Yes	03NOV16	03NOV2016	14	Early Termination	61	Female		184	MF4637	<250 mg/day	No	No	>=250 mg/day	No	No	Yes	No	No
Visit 2			Normal	Musculoskeletal	14_010	2	Yes	03NOV16	03NOV2016	14	Early Termination	61	Female		184	MF4637	<250 mg/day	No	No	>=250 mg/day	No	No	Yes	No	No
Visit 2			Normal	Circulatory	14_010	2	Yes	03NOV16	03NOV2016	14	Early Termination	61	Female		184	MF4637	<250 mg/day	No	No	>=250 mg/day	No	No	Yes	No	No
Visit 2			Normal	Neurologic	14_010	2	Yes	03NOV16	03NOV2016	14	Early Termination	61	Female		184	MF4637	<250 mg/day	No	No	>=250 mg/day	No	No	Yes	No	No
Visit 2			Normal	Lymphatic	14_010	2	Yes	03NOV16	03NOV2016	14	Early Termination	61	Female		184	MF4637	<250 mg/day	No	No	>=250 mg/day	No	No	Yes	No	No
Visit 2			Normal	Respiratory	14_010	2	Yes	03NOV16	03NOV2016	14	Early Termination	61	Female		184	MF4637	<250 mg/day	No	No	>=250 mg/day	No	No	Yes	No	No
Visit 2			Not done	Other, specify	14_010	2	Yes	03NOV16	03NOV2016	14	Early Termination	61	Female		184	MF4637	<250 mg/day	No	No	>=250 mg/day	No	No	Yes	No	No
Visit 2			Normal	General appearance	14_012	2	Yes	14NOV16	14NOV2016	14	Early Termination	34	Male	15NOV16	186	Placebo	<250 mg/day	No	No	>=250 mg/day	No	Yes	Yes	Yes	Yes
Visit 2			Normal	Head, eyes, ears and nose	14_012	2	Yes	14NOV16	14NOV2016	14	Early Termination	34	Male	15NOV16	186	Placebo	<250 mg/day	No	No	>=250 mg/day	No	Yes	Yes	Yes	Yes
Visit 2			Normal	Mouth, teeth and throat	14_012	2	Yes	14NOV16	14NOV2016	14	Early Termination	34	Male	15NOV16	186	Placebo	<250 mg/day	No	No	>=250 mg/day	No	Yes	Yes	Yes	Yes
Visit 2			Normal	Neck and thyroid	14_012	2	Yes	14NOV16	14NOV2016	14	Early Termination	34	Male	15NOV16	186	Placebo	<250 mg/day	No	No	>=250 mg/day	No	Yes	Yes	Yes	Yes
Visit 2			Normal	Chest	14_012	2	Yes	14NOV16	14NOV2016	14	Early Termination	34	Male	15NOV16	186	Placebo	<250 mg/day	No	No	>=250 mg/day	No	Yes	Yes	Yes	Yes
Visit 2			Normal	Heart	14_012	2	Yes	14NOV16	14NOV2016	14	Early Termination	34	Male	15NOV16	186	Placebo	<250 mg/day	No	No	>=250 mg/day	No	Yes	Yes	Yes	Yes
Visit 2			Normal	Abdomen	14_012	2	Yes	14NOV16	14NOV2016	14	Early Termination	34	Male	15NOV16	186	Placebo	<250 mg/day	No	No	>=250 mg/day	No	Yes	Yes	Yes	Yes
Visit 2			Normal	Dermatologic	14_012	2	Yes	14NOV16	14NOV2016	14	Early Termination	34	Male	15NOV16	186	Placebo	<250 mg/day	No	No	>=250 mg/day	No	Yes	Yes	Yes	Yes
Visit 2			Normal	Musculoskeletal	14_012	2	Yes	14NOV16	14NOV2016	14	Early Termination	34	Male	15NOV16	186	Placebo	<250 mg/day	No	No	>=250 mg/day	No	Yes	Yes	Yes	Yes
Visit 2			Normal	Circulatory	14_012	2	Yes	14NOV16	14NOV2016	14	Early Termination	34	Male	15NOV16	186	Placebo	<250 mg/day	No	No	>=250 mg/day	No	Yes	Yes	Yes	Yes
Visit 2			Normal	Neurologic	14_012	2	Yes	14NOV16	14NOV2016	14	Early Termination	34	Male	15NOV16	186	Placebo	<250 mg/day	No	No	>=250 mg/day	No	Yes	Yes	Yes	Yes
Visit 2			Normal	Lymphatic	14_012	2	Yes	14NOV16	14NOV2016	14	Early Termination	34	Male	15NOV16	186	Placebo	<250 mg/day	No	No	>=250 mg/day	No	Yes	Yes	Yes	Yes
Visit 2			Normal	Respiratory	14_012	2	Yes	14NOV16	14NOV2016	14	Early Termination	34	Male	15NOV16	186	Placebo	<250 mg/day	No	No	>=250 mg/day	No	Yes	Yes	Yes	Yes
Visit 2			Not done	Other, specify	14_012	2	Yes	14NOV16	14NOV2016	14	Early Termination	34	Male	15NOV16	186	Placebo	<250 mg/day	No	No	>=250 mg/day	No	Yes	Yes	Yes	Yes
Visit 2			Normal	General appearance	14_014	2	Yes	15NOV16	15NOV2016	14	Entered	33	Female	16NOV16	187	MF4637	<250 mg/day	No	No	>=250 mg/day	No	Yes	Yes	Yes	Yes
Visit 2			Normal	Head, eyes, ears and nose	14_014	2	Yes	15NOV16	15NOV2016	14	Entered	33	Female	16NOV16	187	MF4637	<250 mg/day	No	No	>=250 mg/day	No	Yes	Yes	Yes	Yes
Visit 2			Normal	Mouth, teeth and throat	14_014	2	Yes	15NOV16	15NOV2016	14	Entered	33	Female	16NOV16	187	MF4637	<250 mg/day	No	No	>=250 mg/day	No	Yes	Yes	Yes	Yes
Visit 2			Normal	Neck and thyroid	14_014	2	Yes	15NOV16	15NOV2016	14	Entered	33	Female	16NOV16	187	MF4637	<250 mg/day	No	No	>=250 mg/day	No	Yes	Yes	Yes	Yes
Visit 2			Normal	Chest	14_014	2	Yes	15NOV16	15NOV2016	14	Entered	33	Female	16NOV16	187	MF4637	<250 mg/day	No	No	>=250 mg/day	No	Yes	Yes	Yes	Yes
Visit 2			Normal	Heart	14_014	2	Yes	15NOV16	15NOV2016	14	Entered	33	Female	16NOV16	187	MF4637	<250 mg/day	No	No	>=250 mg/day	No	Yes	Yes	Yes	Yes
Visit 2			Normal	Abdomen	14_014	2	Yes	15NOV16	15NOV2016	14	Entered	33	Female	16NOV16	187	MF4637	<250 mg/day	No	No	>=250 mg/day	No	Yes	Yes	Yes	Yes
Visit 2			Normal	Dermatologic	14_014	2	Yes	15NOV16	15NOV2016	14	Entered	33	Female	16NOV16	187	MF4637	<250 mg/day	No	No	>=250 mg/day	No	Yes	Yes	Yes	Yes
Visit 2			Normal	Musculoskeletal	14_014	2	Yes	15NOV16	15NOV2016	14	Entered	33	Female	16NOV16	187	MF4637	<250 mg/day	No	No	>=250 mg/day	No	Yes	Yes	Yes	Yes
Visit 2			Normal	Circulatory	14_014	2	Yes	15NOV16	15NOV2016	14	Entered	33	Female	16NOV16	187	MF4637	<250 mg/day	No	No	>=250 mg/day	No	Yes	Yes	Yes	Yes
Visit 2			Normal	Neurologic	14_014	2	Yes	15NOV16	15NOV2016	14	Entered	33	Female	16NOV16	187	MF4637	<250 mg/day	No	No	>=250 mg/day	No	Yes	Yes	Yes	Yes
Visit 2			Normal	Lymphatic	14_014	2	Yes	15NOV16	15NOV2016	14	Entered	33	Female	16NOV16	187	MF4637	<250 mg/day	No	No	>=250 mg/day	No	Yes	Yes	Yes	Yes
Visit 2			Normal	Respiratory	14_014	2	Yes	15NOV16	15NOV2016	14	Entered	33	Female	16NOV16	187	MF4637	<250 mg/day	No	No	>=250 mg/day	No	Yes	Yes	Yes	Yes
Visit 2			Not done	Other, specify	14_014	2	Yes	15NOV16	15NOV2016	14	Entered	33	Female	16NOV16	187	MF4637	<250 mg/day	No	No	>=250 mg/day	No	Yes	Yes	Yes	Yes
Visit 2			Normal	General appearance	14_016	2	Yes	30NOV16	30NOV2016	14	Entered	51	Female	01DEC16	209	Placebo	<250 mg/day	No	No	<250 mg/day	No	Yes	Yes	Yes	Yes
Visit 2			Normal	Head, eyes, ears and nose	14_016	2	Yes	30NOV16	30NOV2016	14	Entered	51	Female	01DEC16	209	Placebo	<250 mg/day	No	No	<250 mg/day	No	Yes	Yes	Yes	Yes
Visit 2			Normal	Mouth, teeth and throat	14_016	2	Yes	30NOV16	30NOV2016	14	Entered	51	Female	01DEC16	209	Placebo	<250 mg/day	No	No	<250 mg/day	No	Yes	Yes	Yes	Yes
Visit 2			Normal	Neck and thyroid	14_016	2	Yes	30NOV16	30NOV2016	14	Entered	51	Female	01DEC16	209	Placebo	<250 mg/day	No	No	<250 mg/day	No	Yes	Yes	Yes	Yes
Visit 2			Normal	Chest	14_016	2	Yes	30NOV16	30NOV2016	14	Entered	51	Female	01DEC16	209	Placebo	<250 mg/day	No	No	<250 mg/day	No	Yes	Yes	Yes	Yes
Visit 2			Normal	Heart	14_016	2	Yes	30NOV16	30NOV2016	14	Entered	51	Female	01DEC16	209	Placebo	<250 mg/day	No	No	<250 mg/day	No	Yes	Yes	Yes	Yes
Visit 2			Normal	Abdomen	14_016	2	Yes	30NOV16	30NOV2016	14	Entered	51	Female	01DEC16	209	Placebo	<250 mg/day	No	No	<250 mg/day	No	Yes	Yes	Yes	Yes
Visit 2			Normal	Dermatologic	14_016	2	Yes	30NOV16	30NOV2016	14	Entered	51	Female	01DEC16	209	Placebo	<250 mg/day	No	No	<250 mg/day	No	Yes	Yes	Yes	Yes
Visit 2			Normal	Musculoskeletal	14_016	2	Yes	30NOV16	30NOV2016	14	Entered	51	Female	01DEC16	209	Placebo	<250 mg/day	No	No	<250 mg/day	No	Yes	Yes	Yes	Yes
Visit 2			Normal	Circulatory	14_016	2	Yes	30NOV16	30NOV2016	14	Entered	51	Female	01DEC16	209	Placebo	<250 mg/day	No	No	<250 mg/day	No	Yes	Yes	Yes	Yes
Visit 2			Normal	Neurologic	14_016	2	Yes	30NOV16	30NOV2016	14	Entered	51	Female	01DEC16	209	Placebo	<250 mg/day	No	No	<250 mg/day	No	Yes	Yes	Yes	Yes
Visit 2			Normal	Lymphatic	14_016	2	Yes	30NOV16	30NOV2016	14	Entered	51	Female	01DEC16	209	Placebo	<250 mg/day	No	No	<250 mg/day	No	Yes	Yes	Yes	Yes
Visit 2			Normal	Respiratory	14_016	2	Yes	30NOV16	30NOV2016	14	Entered	51	Female	01DEC16	209	Placebo	<250 mg/day	No	No	<250 mg/day	No	Yes	Yes	Yes	Yes
Visit 2			Not done	Other, specify	14_016	2	Yes	30NOV16	30NOV2016	14	Entered	51	Female	01DEC16	209	Placebo	<250 mg/day	No	No	<250 mg/day	No	Yes	Yes	Yes	Yes
Visit 2			Normal	General appearance	14_018	2	Yes	05DEC16	05DEC2016	14	Entered	25	Female	05DEC16	210	MF4637	>=250 mg/day	No	No	>=250 mg/day	No	Yes	Yes	Yes	Yes
Visit 2			Normal	Head, eyes, ears and nose	14_018	2	Yes	05DEC16	05DEC2016	14	Entered	25	Female	05DEC16	210	MF4637	>=250 mg/day	No	No	>=250 mg/day	No	Yes	Yes	Yes	Yes
Visit 2			Normal	Mouth, teeth and throat	14_018	2	Yes	05DEC16	05DEC2016	14	Entered	25	Female	05DEC16	210	MF4637	>=250 mg/day	No	No	>=250 mg/day	No	Yes	Yes	Yes	Yes
Visit 2			Normal	Neck and thyroid	14_018	2	Yes	05DEC16	05DEC2016	14	Entered	25	Female	05DEC16	210	MF4637	>=250 mg/day	No	No	>=250 mg/day	No	Yes	Yes	Yes	Yes
Visit 2			Normal	Chest	14_018	2	Yes	05DEC16	05DEC2016	14	Entered	25	Female	05DEC16	210	MF4637	>=250 mg/day	No	No	>=250 mg/day	No	Yes	Yes	Yes	Yes
Visit 2			Normal	Heart	14_018	2	Yes	05DEC16	05DEC2016	14	Entered	25	Female	05DEC16	210	MF4637	>=250 mg/day	No	No	>=250 mg/day	No	Yes	Yes	Yes	Yes
Visit 2			Normal	Abdomen	14_018	2	Yes	05DEC16	05DEC2016	14	Entered	25	Female	05DEC16	210	MF4637	>=250 mg/day	No	No	>=250 mg/day	No	Yes	Yes	Yes	Yes
Visit 2			Normal	Dermatologic	14_018	2	Yes	05DEC16	05DEC2016	14	Entered	25	Female	05DEC16	210	MF4637	>=250 mg/day	No	No	>=250 mg/day	No	Yes	Yes	Yes	Yes
Visit 2			Normal	Musculoskeletal	14_018	2	Yes	05DEC16	05DEC2016	14	Entered	25	Female	05DEC16	210	MF4637	>=250 mg/day	No	No	>=250 mg/day	No	Yes	Yes	Yes	Yes
Visit 2			Normal	Circulatory	14_018	2	Yes	05DEC16	05DEC2016	14	Entered	25	Female	05DEC16	210	MF4637	>=250 mg/day	No	No	>=250 mg/day	No	Yes	Yes	Yes	Yes
Visit 2			Normal	Neurologic	14_018	2	Yes	05DEC16	05DEC2016	14	Entered	25	Female	05DEC16	210	MF4637	>=250 mg/day	No	No	>=250 mg/day	No	Yes	Yes	Yes	Yes
Visit 2			Normal	Lymphatic	14_018	2	Yes	05DEC16	05DEC2016	14	Entered	25	Female	05DEC16	210	MF4637	>=250 mg/day	No	No	>=250 mg/day	No	Yes	Yes	Yes	Yes
Visit 2			Normal	Respiratory	14_018	2	Yes	05DEC16	05DEC2016	14	Entered	25	Female	05DEC16	210	MF4637	>=250 mg/day	No	No	>=250 mg/day	No	Yes	Yes	Yes	Yes
Visit 2			Not done	Other, specify	14_018	2	Yes	05DEC16	05DEC2016	14	Entered	25	Female	05DEC16	210	MF4637	>=250 mg/day	No	No	>=250 mg/day	No	Yes	Yes	Yes	Yes
Visit 2			Normal	General appearance	14_019	2	Yes	02DEC16	02DEC2016	14	Entered	32	Male	03DEC16	211	Placebo	<250 mg/day	No	Yes	<250 mg/day	No	Yes	Yes	Yes	Yes
Visit 2			Normal	Head, eyes, ears and nose	14_019	2	Yes	02DEC16	02DEC2016	14	Entered	32	Male	03DEC16	211	Placebo	<250 mg/day	No	Yes	<250 mg/day	No	Yes	Yes	Yes	Yes
Visit 2			Normal	Mouth, teeth and throat	14_019	2	Yes	02DEC16	02DEC2016	14	Entered	32	Male	03DEC16	211	Placebo	<250 mg/day	No	Yes	<250 mg/day	No	Yes	Yes	Yes	Yes
Visit 2			Normal	Neck and thyroid	14_019	2	Yes	02DEC16	02DEC2016	14	Entered	32	Male	03DEC16	211	Placebo	<250 mg/day	No	Yes	<250 mg/day	No	Yes	Yes	Yes	Yes
Visit 2			Normal	Chest	14_019	2	Yes	02DEC16	02DEC2016	14	Entered	32	Male	03DEC16	211	Placebo	<250 mg/day	No	Yes	<250 mg/day	No	Yes	Yes	Yes	Yes
Visit 2			Normal	Heart	14_019	2	Yes	02DEC16	02DEC2016	14	Entered	32	Male	03DEC16	211	Placebo	<250 mg/day	No	Yes	<250 mg/day	No	Yes	Yes	Yes	Yes
Visit 2			Normal	Abdomen	14_019	2	Yes	02DEC16	02DEC2016	14	Entered	32	Male	03DEC16	211	Placebo	<250 mg/day	No	Yes	<250 mg/day	No	Yes	Yes	Yes	Yes
Visit 2			Normal	Dermatologic	14_019	2	Yes	02DEC16	02DEC2016	14	Entered	32	Male	03DEC16	211	Placebo	<250 mg/day	No	Yes	<250 mg/day	No	Yes	Yes	Yes	Yes
Visit 2			Normal	Musculoskeletal	14_019	2	Yes	02DEC16	02DEC2016	14	Entered	32	Male	03DEC16	211	Placebo	<250 mg/day	No	Yes	<250 mg/day	No	Yes	Yes	Yes	Yes
Visit 2			Normal	Circulatory	14_019	2	Yes	02DEC16	02DEC2016	14	Entered	32	Male	03DEC16	211	Placebo	<250 mg/day	No	Yes	<250 mg/day	No	Yes	Yes	Yes	Yes
Visit 2			Normal	Neurologic	14_019	2	Yes	02DEC16	02DEC2016	14	Entered	32	Male	03DEC16	211	Placebo	<250 mg/day	No	Yes	<250 mg/day	No	Yes	Yes	Yes	Yes
Visit 2			Normal	Lymphatic	14_019	2	Yes	02DEC16	02DEC2016	14	Entered	32	Male	03DEC16	211	Placebo	<250 mg/day	No	Yes	<250 mg/day	No	Yes	Yes	Yes	Yes
Visit 2			Normal	Respiratory	14_019	2	Yes	02DEC16	02DEC2016	14	Entered	32	Male	03DEC16	211	Placebo	<250 mg/day	No	Yes	<250 mg/day	No	Yes	Yes	Yes	Yes
Visit 2			Not done	Other, specify	14_019	2	Yes	02DEC16	02DEC2016	14	Entered	32	Male	03DEC16	211	Placebo	<250 mg/day	No	Yes	<250 mg/day	No	Yes	Yes	Yes	Yes
Visit 2			Normal	General appearance	15_002	2	Yes	27SEP16	27SEP2016	15	Entered	67	Male	27SEP16	149	Placebo	<250 mg/day	No	No	<250 mg/day	No	Yes	Yes	Yes	Yes
Visit 2			Normal	Head, eyes, ears and nose	15_002	2	Yes	27SEP16	27SEP2016	15	Entered	67	Male	27SEP16	149	Placebo	<250 mg/day	No	No	<250 mg/day	No	Yes	Yes	Yes	Yes
Visit 2			Normal	Mouth, teeth and throat	15_002	2	Yes	27SEP16	27SEP2016	15	Entered	67	Male	27SEP16	149	Placebo	<250 mg/day	No	No	<250 mg/day	No	Yes	Yes	Yes	Yes
Visit 2			Normal	Neck and thyroid	15_002	2	Yes	27SEP16	27SEP2016	15	Entered	67	Male	27SEP16	149	Placebo	<250 mg/day	No	No	<250 mg/day	No	Yes	Yes	Yes	Yes
Visit 2			Normal	Chest	15_002	2	Yes	27SEP16	27SEP2016	15	Entered	67	Male	27SEP16	149	Placebo	<250 mg/day	No	No	<250 mg/day	No	Yes	Yes	Yes	Yes
Visit 2			Normal	Heart	15_002	2	Yes	27SEP16	27SEP2016	15	Entered	67	Male	27SEP16	149	Placebo	<250 mg/day	No	No	<250 mg/day	No	Yes	Yes	Yes	Yes
Visit 2			Normal	Abdomen	15_002	2	Yes	27SEP16	27SEP2016	15	Entered	67	Male	27SEP16	149	Placebo	<250 mg/day	No	No	<250 mg/day	No	Yes	Yes	Yes	Yes
Visit 2			Normal	Dermatologic	15_002	2	Yes	27SEP16	27SEP2016	15	Entered	67	Male	27SEP16	149	Placebo	<250 mg/day	No	No	<250 mg/day	No	Yes	Yes	Yes	Yes
Visit 2			Normal	Musculoskeletal	15_002	2	Yes	27SEP16	27SEP2016	15	Entered	67	Male	27SEP16	149	Placebo	<250 mg/day	No	No	<250 mg/day	No	Yes	Yes	Yes	Yes
Visit 2			Normal	Circulatory	15_002	2	Yes	27SEP16	27SEP2016	15	Entered	67	Male	27SEP16	149	Placebo	<250 mg/day	No	No	<250 mg/day	No	Yes	Yes	Yes	Yes
Visit 2			Normal	Neurologic	15_002	2	Yes	27SEP16	27SEP2016	15	Entered	67	Male	27SEP16	149	Placebo	<250 mg/day	No	No	<250 mg/day	No	Yes	Yes	Yes	Yes
Visit 2			Normal	Lymphatic	15_002	2	Yes	27SEP16	27SEP2016	15	Entered	67	Male	27SEP16	149	Placebo	<250 mg/day	No	No	<250 mg/day	No	Yes	Yes	Yes	Yes
Visit 2			Normal	Respiratory	15_002	2	Yes	27SEP16	27SEP2016	15	Entered	67	Male	27SEP16	149	Placebo	<250 mg/day	No	No	<250 mg/day	No	Yes	Yes	Yes	Yes
Visit 2			Not done	Other, specify	15_002	2	Yes	27SEP16	27SEP2016	15	Entered	67	Male	27SEP16	149	Placebo	<250 mg/day	No	No	<250 mg/day	No	Yes	Yes	Yes	Yes
Visit 2			Normal	General appearance	15_005	2	Yes	28SEP16	28SEP2016	15	Entered	58	Male	28SEP16	150	Placebo	<250 mg/day	No	No	>=250 mg/day	No	Yes	Yes	Yes	Yes
Visit 2			Normal	Head, eyes, ears and nose	15_005	2	Yes	28SEP16	28SEP2016	15	Entered	58	Male	28SEP16	150	Placebo	<250 mg/day	No	No	>=250 mg/day	No	Yes	Yes	Yes	Yes
Visit 2			Normal	Mouth, teeth and throat	15_005	2	Yes	28SEP16	28SEP2016	15	Entered	58	Male	28SEP16	150	Placebo	<250 mg/day	No	No	>=250 mg/day	No	Yes	Yes	Yes	Yes
Visit 2			Normal	Neck and thyroid	15_005	2	Yes	28SEP16	28SEP2016	15	Entered	58	Male	28SEP16	150	Placebo	<250 mg/day	No	No	>=250 mg/day	No	Yes	Yes	Yes	Yes
Visit 2			Normal	Chest	15_005	2	Yes	28SEP16	28SEP2016	15	Entered	58	Male	28SEP16	150	Placebo	<250 mg/day	No	No	>=250 mg/day	No	Yes	Yes	Yes	Yes
Visit 2			Normal	Heart	15_005	2	Yes	28SEP16	28SEP2016	15	Entered	58	Male	28SEP16	150	Placebo	<250 mg/day	No	No	>=250 mg/day	No	Yes	Yes	Yes	Yes
Visit 2			Normal	Abdomen	15_005	2	Yes	28SEP16	28SEP2016	15	Entered	58	Male	28SEP16	150	Placebo	<250 mg/day	No	No	>=250 mg/day	No	Yes	Yes	Yes	Yes
Visit 2			Normal	Dermatologic	15_005	2	Yes	28SEP16	28SEP2016	15	Entered	58	Male	28SEP16	150	Placebo	<250 mg/day	No	No	>=250 mg/day	No	Yes	Yes	Yes	Yes
Visit 2			Normal	Musculoskeletal	15_005	2	Yes	28SEP16	28SEP2016	15	Entered	58	Male	28SEP16	150	Placebo	<250 mg/day	No	No	>=250 mg/day	No	Yes	Yes	Yes	Yes
Visit 2			Normal	Circulatory	15_005	2	Yes	28SEP16	28SEP2016	15	Entered	58	Male	28SEP16	150	Placebo	<250 mg/day	No	No	>=250 mg/day	No	Yes	Yes	Yes	Yes
Visit 2			Normal	Neurologic	15_005	2	Yes	28SEP16	28SEP2016	15	Entered	58	Male	28SEP16	150	Placebo	<250 mg/day	No	No	>=250 mg/day	No	Yes	Yes	Yes	Yes
Visit 2			Normal	Lymphatic	15_005	2	Yes	28SEP16	28SEP2016	15	Entered	58	Male	28SEP16	150	Placebo	<250 mg/day	No	No	>=250 mg/day	No	Yes	Yes	Yes	Yes
Visit 2			Normal	Respiratory	15_005	2	Yes	28SEP16	28SEP2016	15	Entered	58	Male	28SEP16	150	Placebo	<250 mg/day	No	No	>=250 mg/day	No	Yes	Yes	Yes	Yes
Visit 2			Not done	Other, specify	15_005	2	Yes	28SEP16	28SEP2016	15	Entered	58	Male	28SEP16	150	Placebo	<250 mg/day	No	No	>=250 mg/day	No	Yes	Yes	Yes	Yes
Visit 2			Normal	General appearance	15_006	2	Yes	27SEP16	27SEP2016	15	Entered	69	Male	27SEP16	148	MF4637	<250 mg/day	No	No	>=250 mg/day	No	Yes	Yes	Yes	Yes
Visit 2			Normal	Head, eyes, ears and nose	15_006	2	Yes	27SEP16	27SEP2016	15	Entered	69	Male	27SEP16	148	MF4637	<250 mg/day	No	No	>=250 mg/day	No	Yes	Yes	Yes	Yes
Visit 2			Normal	Mouth, teeth and throat	15_006	2	Yes	27SEP16	27SEP2016	15	Entered	69	Male	27SEP16	148	MF4637	<250 mg/day	No	No	>=250 mg/day	No	Yes	Yes	Yes	Yes
Visit 2			Normal	Neck and thyroid	15_006	2	Yes	27SEP16	27SEP2016	15	Entered	69	Male	27SEP16	148	MF4637	<250 mg/day	No	No	>=250 mg/day	No	Yes	Yes	Yes	Yes
Visit 2			Normal	Chest	15_006	2	Yes	27SEP16	27SEP2016	15	Entered	69	Male	27SEP16	148	MF4637	<250 mg/day	No	No	>=250 mg/day	No	Yes	Yes	Yes	Yes
Visit 2			Normal	Heart	15_006	2	Yes	27SEP16	27SEP2016	15	Entered	69	Male	27SEP16	148	MF4637	<250 mg/day	No	No	>=250 mg/day	No	Yes	Yes	Yes	Yes
Visit 2			Normal	Abdomen	15_006	2	Yes	27SEP16	27SEP2016	15	Entered	69	Male	27SEP16	148	MF4637	<250 mg/day	No	No	>=250 mg/day	No	Yes	Yes	Yes	Yes
Visit 2			Normal	Dermatologic	15_006	2	Yes	27SEP16	27SEP2016	15	Entered	69	Male	27SEP16	148	MF4637	<250 mg/day	No	No	>=250 mg/day	No	Yes	Yes	Yes	Yes
Visit 2			Normal	Musculoskeletal	15_006	2	Yes	27SEP16	27SEP2016	15	Entered	69	Male	27SEP16	148	MF4637	<250 mg/day	No	No	>=250 mg/day	No	Yes	Yes	Yes	Yes
Visit 2			Normal	Circulatory	15_006	2	Yes	27SEP16	27SEP2016	15	Entered	69	Male	27SEP16	148	MF4637	<250 mg/day	No	No	>=250 mg/day	No	Yes	Yes	Yes	Yes
Visit 2			Normal	Neurologic	15_006	2	Yes	27SEP16	27SEP2016	15	Entered	69	Male	27SEP16	148	MF4637	<250 mg/day	No	No	>=250 mg/day	No	Yes	Yes	Yes	Yes
Visit 2			Normal	Lymphatic	15_006	2	Yes	27SEP16	27SEP2016	15	Entered	69	Male	27SEP16	148	MF4637	<250 mg/day	No	No	>=250 mg/day	No	Yes	Yes	Yes	Yes
Visit 2			Normal	Respiratory	15_006	2	Yes	27SEP16	27SEP2016	15	Entered	69	Male	27SEP16	148	MF4637	<250 mg/day	No	No	>=250 mg/day	No	Yes	Yes	Yes	Yes
Visit 2			Not done	Other, specify	15_006	2	Yes	27SEP16	27SEP2016	15	Entered	69	Male	27SEP16	148	MF4637	<250 mg/day	No	No	>=250 mg/day	No	Yes	Yes	Yes	Yes
Visit 2			Normal	General appearance	15_007	2	Yes	29SEP16	29SEP2016	15	Entered	74	Male	29SEP16	236	Placebo	<250 mg/day	No	No	>=250 mg/day	No	Yes	Yes	Yes	Yes
Visit 2			Normal	Head, eyes, ears and nose	15_007	2	Yes	29SEP16	29SEP2016	15	Entered	74	Male	29SEP16	236	Placebo	<250 mg/day	No	No	>=250 mg/day	No	Yes	Yes	Yes	Yes
Visit 2			Normal	Mouth, teeth and throat	15_007	2	Yes	29SEP16	29SEP2016	15	Entered	74	Male	29SEP16	236	Placebo	<250 mg/day	No	No	>=250 mg/day	No	Yes	Yes	Yes	Yes
Visit 2			Normal	Neck and thyroid	15_007	2	Yes	29SEP16	29SEP2016	15	Entered	74	Male	29SEP16	236	Placebo	<250 mg/day	No	No	>=250 mg/day	No	Yes	Yes	Yes	Yes
Visit 2			Normal	Chest	15_007	2	Yes	29SEP16	29SEP2016	15	Entered	74	Male	29SEP16	236	Placebo	<250 mg/day	No	No	>=250 mg/day	No	Yes	Yes	Yes	Yes
Visit 2			Normal	Heart	15_007	2	Yes	29SEP16	29SEP2016	15	Entered	74	Male	29SEP16	236	Placebo	<250 mg/day	No	No	>=250 mg/day	No	Yes	Yes	Yes	Yes
Visit 2			Normal	Abdomen	15_007	2	Yes	29SEP16	29SEP2016	15	Entered	74	Male	29SEP16	236	Placebo	<250 mg/day	No	No	>=250 mg/day	No	Yes	Yes	Yes	Yes
Visit 2			Normal	Dermatologic	15_007	2	Yes	29SEP16	29SEP2016	15	Entered	74	Male	29SEP16	236	Placebo	<250 mg/day	No	No	>=250 mg/day	No	Yes	Yes	Yes	Yes
Visit 2			Normal	Musculoskeletal	15_007	2	Yes	29SEP16	29SEP2016	15	Entered	74	Male	29SEP16	236	Placebo	<250 mg/day	No	No	>=250 mg/day	No	Yes	Yes	Yes	Yes
Visit 2			Normal	Circulatory	15_007	2	Yes	29SEP16	29SEP2016	15	Entered	74	Male	29SEP16	236	Placebo	<250 mg/day	No	No	>=250 mg/day	No	Yes	Yes	Yes	Yes
Visit 2			Normal	Neurologic	15_007	2	Yes	29SEP16	29SEP2016	15	Entered	74	Male	29SEP16	236	Placebo	<250 mg/day	No	No	>=250 mg/day	No	Yes	Yes	Yes	Yes
Visit 2			Normal	Lymphatic	15_007	2	Yes	29SEP16	29SEP2016	15	Entered	74	Male	29SEP16	236	Placebo	<250 mg/day	No	No	>=250 mg/day	No	Yes	Yes	Yes	Yes
Visit 2			Normal	Respiratory	15_007	2	Yes	29SEP16	29SEP2016	15	Entered	74	Male	29SEP16	236	Placebo	<250 mg/day	No	No	>=250 mg/day	No	Yes	Yes	Yes	Yes
Visit 2			Not done	Other, specify	15_007	2	Yes	29SEP16	29SEP2016	15	Entered	74	Male	29SEP16	236	Placebo	<250 mg/day	No	No	>=250 mg/day	No	Yes	Yes	Yes	Yes
Visit 2			Normal	General appearance	15_008	2	Yes	28SEP16	28SEP2016	15	Entered	55	Male	28SEP16	151	MF4637	<250 mg/day	No	No	<250 mg/day	No	Yes	Yes	Yes	Yes
Visit 2			Normal	Head, eyes, ears and nose	15_008	2	Yes	28SEP16	28SEP2016	15	Entered	55	Male	28SEP16	151	MF4637	<250 mg/day	No	No	<250 mg/day	No	Yes	Yes	Yes	Yes
Visit 2			Normal	Mouth, teeth and throat	15_008	2	Yes	28SEP16	28SEP2016	15	Entered	55	Male	28SEP16	151	MF4637	<250 mg/day	No	No	<250 mg/day	No	Yes	Yes	Yes	Yes
Visit 2			Normal	Neck and thyroid	15_008	2	Yes	28SEP16	28SEP2016	15	Entered	55	Male	28SEP16	151	MF4637	<250 mg/day	No	No	<250 mg/day	No	Yes	Yes	Yes	Yes
Visit 2			Normal	Chest	15_008	2	Yes	28SEP16	28SEP2016	15	Entered	55	Male	28SEP16	151	MF4637	<250 mg/day	No	No	<250 mg/day	No	Yes	Yes	Yes	Yes
Visit 2			Normal	Heart	15_008	2	Yes	28SEP16	28SEP2016	15	Entered	55	Male	28SEP16	151	MF4637	<250 mg/day	No	No	<250 mg/day	No	Yes	Yes	Yes	Yes
Visit 2			Normal	Abdomen	15_008	2	Yes	28SEP16	28SEP2016	15	Entered	55	Male	28SEP16	151	MF4637	<250 mg/day	No	No	<250 mg/day	No	Yes	Yes	Yes	Yes
Visit 2			Normal	Dermatologic	15_008	2	Yes	28SEP16	28SEP2016	15	Entered	55	Male	28SEP16	151	MF4637	<250 mg/day	No	No	<250 mg/day	No	Yes	Yes	Yes	Yes
Visit 2			Normal	Musculoskeletal	15_008	2	Yes	28SEP16	28SEP2016	15	Entered	55	Male	28SEP16	151	MF4637	<250 mg/day	No	No	<250 mg/day	No	Yes	Yes	Yes	Yes
Visit 2			Normal	Circulatory	15_008	2	Yes	28SEP16	28SEP2016	15	Entered	55	Male	28SEP16	151	MF4637	<250 mg/day	No	No	<250 mg/day	No	Yes	Yes	Yes	Yes
Visit 2			Normal	Neurologic	15_008	2	Yes	28SEP16	28SEP2016	15	Entered	55	Male	28SEP16	151	MF4637	<250 mg/day	No	No	<250 mg/day	No	Yes	Yes	Yes	Yes
Visit 2			Normal	Lymphatic	15_008	2	Yes	28SEP16	28SEP2016	15	Entered	55	Male	28SEP16	151	MF4637	<250 mg/day	No	No	<250 mg/day	No	Yes	Yes	Yes	Yes
Visit 2			Normal	Respiratory	15_008	2	Yes	28SEP16	28SEP2016	15	Entered	55	Male	28SEP16	151	MF4637	<250 mg/day	No	No	<250 mg/day	No	Yes	Yes	Yes	Yes
Visit 2			Not done	Other, specify	15_008	2	Yes	28SEP16	28SEP2016	15	Entered	55	Male	28SEP16	151	MF4637	<250 mg/day	No	No	<250 mg/day	No	Yes	Yes	Yes	Yes
Visit 2			Normal	General appearance	15_009	2	Yes	10OCT16	10OCT2016	15	Entered	70	Female	10OCT16	237	MF4637	<250 mg/day	No	No	<250 mg/day	No	Yes	Yes	Yes	Yes
Visit 2			Normal	Head, eyes, ears and nose	15_009	2	Yes	10OCT16	10OCT2016	15	Entered	70	Female	10OCT16	237	MF4637	<250 mg/day	No	No	<250 mg/day	No	Yes	Yes	Yes	Yes
Visit 2			Normal	Mouth, teeth and throat	15_009	2	Yes	10OCT16	10OCT2016	15	Entered	70	Female	10OCT16	237	MF4637	<250 mg/day	No	No	<250 mg/day	No	Yes	Yes	Yes	Yes
Visit 2			Normal	Neck and thyroid	15_009	2	Yes	10OCT16	10OCT2016	15	Entered	70	Female	10OCT16	237	MF4637	<250 mg/day	No	No	<250 mg/day	No	Yes	Yes	Yes	Yes
Visit 2			Normal	Chest	15_009	2	Yes	10OCT16	10OCT2016	15	Entered	70	Female	10OCT16	237	MF4637	<250 mg/day	No	No	<250 mg/day	No	Yes	Yes	Yes	Yes
Visit 2			Normal	Heart	15_009	2	Yes	10OCT16	10OCT2016	15	Entered	70	Female	10OCT16	237	MF4637	<250 mg/day	No	No	<250 mg/day	No	Yes	Yes	Yes	Yes
Visit 2			Normal	Abdomen	15_009	2	Yes	10OCT16	10OCT2016	15	Entered	70	Female	10OCT16	237	MF4637	<250 mg/day	No	No	<250 mg/day	No	Yes	Yes	Yes	Yes
Visit 2			Normal	Dermatologic	15_009	2	Yes	10OCT16	10OCT2016	15	Entered	70	Female	10OCT16	237	MF4637	<250 mg/day	No	No	<250 mg/day	No	Yes	Yes	Yes	Yes
Visit 2			Normal	Musculoskeletal	15_009	2	Yes	10OCT16	10OCT2016	15	Entered	70	Female	10OCT16	237	MF4637	<250 mg/day	No	No	<250 mg/day	No	Yes	Yes	Yes	Yes
Visit 2			Normal	Circulatory	15_009	2	Yes	10OCT16	10OCT2016	15	Entered	70	Female	10OCT16	237	MF4637	<250 mg/day	No	No	<250 mg/day	No	Yes	Yes	Yes	Yes
Visit 2			Normal	Neurologic	15_009	2	Yes	10OCT16	10OCT2016	15	Entered	70	Female	10OCT16	237	MF4637	<250 mg/day	No	No	<250 mg/day	No	Yes	Yes	Yes	Yes
Visit 2			Normal	Lymphatic	15_009	2	Yes	10OCT16	10OCT2016	15	Entered	70	Female	10OCT16	237	MF4637	<250 mg/day	No	No	<250 mg/day	No	Yes	Yes	Yes	Yes
Visit 2			Normal	Respiratory	15_009	2	Yes	10OCT16	10OCT2016	15	Entered	70	Female	10OCT16	237	MF4637	<250 mg/day	No	No	<250 mg/day	No	Yes	Yes	Yes	Yes
Visit 2			Not done	Other, specify	15_009	2	Yes	10OCT16	10OCT2016	15	Entered	70	Female	10OCT16	237	MF4637	<250 mg/day	No	No	<250 mg/day	No	Yes	Yes	Yes	Yes
Visit 2			Normal	General appearance	15_010	2	Yes	11OCT16	11OCT2016	15	Entered	64	Female	11OCT16	238	Placebo	<250 mg/day	No	No	<250 mg/day	No	Yes	Yes	Yes	Yes
Visit 2			Normal	Head, eyes, ears and nose	15_010	2	Yes	11OCT16	11OCT2016	15	Entered	64	Female	11OCT16	238	Placebo	<250 mg/day	No	No	<250 mg/day	No	Yes	Yes	Yes	Yes
Visit 2			Normal	Mouth, teeth and throat	15_010	2	Yes	11OCT16	11OCT2016	15	Entered	64	Female	11OCT16	238	Placebo	<250 mg/day	No	No	<250 mg/day	No	Yes	Yes	Yes	Yes
Visit 2			Normal	Neck and thyroid	15_010	2	Yes	11OCT16	11OCT2016	15	Entered	64	Female	11OCT16	238	Placebo	<250 mg/day	No	No	<250 mg/day	No	Yes	Yes	Yes	Yes
Visit 2			Normal	Chest	15_010	2	Yes	11OCT16	11OCT2016	15	Entered	64	Female	11OCT16	238	Placebo	<250 mg/day	No	No	<250 mg/day	No	Yes	Yes	Yes	Yes
Visit 2			Normal	Heart	15_010	2	Yes	11OCT16	11OCT2016	15	Entered	64	Female	11OCT16	238	Placebo	<250 mg/day	No	No	<250 mg/day	No	Yes	Yes	Yes	Yes
Visit 2			Normal	Abdomen	15_010	2	Yes	11OCT16	11OCT2016	15	Entered	64	Female	11OCT16	238	Placebo	<250 mg/day	No	No	<250 mg/day	No	Yes	Yes	Yes	Yes
Visit 2			Normal	Dermatologic	15_010	2	Yes	11OCT16	11OCT2016	15	Entered	64	Female	11OCT16	238	Placebo	<250 mg/day	No	No	<250 mg/day	No	Yes	Yes	Yes	Yes
Visit 2			Normal	Musculoskeletal	15_010	2	Yes	11OCT16	11OCT2016	15	Entered	64	Female	11OCT16	238	Placebo	<250 mg/day	No	No	<250 mg/day	No	Yes	Yes	Yes	Yes
Visit 2			Normal	Circulatory	15_010	2	Yes	11OCT16	11OCT2016	15	Entered	64	Female	11OCT16	238	Placebo	<250 mg/day	No	No	<250 mg/day	No	Yes	Yes	Yes	Yes
Visit 2			Normal	Neurologic	15_010	2	Yes	11OCT16	11OCT2016	15	Entered	64	Female	11OCT16	238	Placebo	<250 mg/day	No	No	<250 mg/day	No	Yes	Yes	Yes	Yes
Visit 2			Normal	Lymphatic	15_010	2	Yes	11OCT16	11OCT2016	15	Entered	64	Female	11OCT16	238	Placebo	<250 mg/day	No	No	<250 mg/day	No	Yes	Yes	Yes	Yes
Visit 2			Normal	Respiratory	15_010	2	Yes	11OCT16	11OCT2016	15	Entered	64	Female	11OCT16	238	Placebo	<250 mg/day	No	No	<250 mg/day	No	Yes	Yes	Yes	Yes
Visit 2			Not done	Other, specify	15_010	2	Yes	11OCT16	11OCT2016	15	Entered	64	Female	11OCT16	238	Placebo	<250 mg/day	No	No	<250 mg/day	No	Yes	Yes	Yes	Yes
Visit 2			Normal	General appearance	15_011	2	Yes	13OCT16	13OCT2016	15	Entered	66	Male	13OCT16	240	Placebo	<250 mg/day	No	No	<250 mg/day	No	Yes	Yes	Yes	Yes
Visit 2			Normal	Head, eyes, ears and nose	15_011	2	Yes	13OCT16	13OCT2016	15	Entered	66	Male	13OCT16	240	Placebo	<250 mg/day	No	No	<250 mg/day	No	Yes	Yes	Yes	Yes
Visit 2			Normal	Mouth, teeth and throat	15_011	2	Yes	13OCT16	13OCT2016	15	Entered	66	Male	13OCT16	240	Placebo	<250 mg/day	No	No	<250 mg/day	No	Yes	Yes	Yes	Yes
Visit 2			Normal	Neck and thyroid	15_011	2	Yes	13OCT16	13OCT2016	15	Entered	66	Male	13OCT16	240	Placebo	<250 mg/day	No	No	<250 mg/day	No	Yes	Yes	Yes	Yes
Visit 2			Normal	Chest	15_011	2	Yes	13OCT16	13OCT2016	15	Entered	66	Male	13OCT16	240	Placebo	<250 mg/day	No	No	<250 mg/day	No	Yes	Yes	Yes	Yes
Visit 2			Normal	Heart	15_011	2	Yes	13OCT16	13OCT2016	15	Entered	66	Male	13OCT16	240	Placebo	<250 mg/day	No	No	<250 mg/day	No	Yes	Yes	Yes	Yes
Visit 2			Normal	Abdomen	15_011	2	Yes	13OCT16	13OCT2016	15	Entered	66	Male	13OCT16	240	Placebo	<250 mg/day	No	No	<250 mg/day	No	Yes	Yes	Yes	Yes
Visit 2			Normal	Dermatologic	15_011	2	Yes	13OCT16	13OCT2016	15	Entered	66	Male	13OCT16	240	Placebo	<250 mg/day	No	No	<250 mg/day	No	Yes	Yes	Yes	Yes
Visit 2			Normal	Musculoskeletal	15_011	2	Yes	13OCT16	13OCT2016	15	Entered	66	Male	13OCT16	240	Placebo	<250 mg/day	No	No	<250 mg/day	No	Yes	Yes	Yes	Yes
Visit 2			Normal	Circulatory	15_011	2	Yes	13OCT16	13OCT2016	15	Entered	66	Male	13OCT16	240	Placebo	<250 mg/day	No	No	<250 mg/day	No	Yes	Yes	Yes	Yes
Visit 2			Normal	Neurologic	15_011	2	Yes	13OCT16	13OCT2016	15	Entered	66	Male	13OCT16	240	Placebo	<250 mg/day	No	No	<250 mg/day	No	Yes	Yes	Yes	Yes
Visit 2			Normal	Lymphatic	15_011	2	Yes	13OCT16	13OCT2016	15	Entered	66	Male	13OCT16	240	Placebo	<250 mg/day	No	No	<250 mg/day	No	Yes	Yes	Yes	Yes
Visit 2			Normal	Respiratory	15_011	2	Yes	13OCT16	13OCT2016	15	Entered	66	Male	13OCT16	240	Placebo	<250 mg/day	No	No	<250 mg/day	No	Yes	Yes	Yes	Yes
Visit 2			Not done	Other, specify	15_011	2	Yes	13OCT16	13OCT2016	15	Entered	66	Male	13OCT16	240	Placebo	<250 mg/day	No	No	<250 mg/day	No	Yes	Yes	Yes	Yes
Visit 2			Normal	General appearance	15_012	2	Yes	19OCT16	19OCT2016	15	Entered	54	Female	19OCT16	241	Placebo	<250 mg/day	No	No	<250 mg/day	No	Yes	Yes	Yes	Yes
Visit 2			Normal	Head, eyes, ears and nose	15_012	2	Yes	19OCT16	19OCT2016	15	Entered	54	Female	19OCT16	241	Placebo	<250 mg/day	No	No	<250 mg/day	No	Yes	Yes	Yes	Yes
Visit 2			Normal	Mouth, teeth and throat	15_012	2	Yes	19OCT16	19OCT2016	15	Entered	54	Female	19OCT16	241	Placebo	<250 mg/day	No	No	<250 mg/day	No	Yes	Yes	Yes	Yes
Visit 2			Normal	Neck and thyroid	15_012	2	Yes	19OCT16	19OCT2016	15	Entered	54	Female	19OCT16	241	Placebo	<250 mg/day	No	No	<250 mg/day	No	Yes	Yes	Yes	Yes
Visit 2			Normal	Chest	15_012	2	Yes	19OCT16	19OCT2016	15	Entered	54	Female	19OCT16	241	Placebo	<250 mg/day	No	No	<250 mg/day	No	Yes	Yes	Yes	Yes
Visit 2			Normal	Heart	15_012	2	Yes	19OCT16	19OCT2016	15	Entered	54	Female	19OCT16	241	Placebo	<250 mg/day	No	No	<250 mg/day	No	Yes	Yes	Yes	Yes
Visit 2			Normal	Abdomen	15_012	2	Yes	19OCT16	19OCT2016	15	Entered	54	Female	19OCT16	241	Placebo	<250 mg/day	No	No	<250 mg/day	No	Yes	Yes	Yes	Yes
Visit 2			Normal	Dermatologic	15_012	2	Yes	19OCT16	19OCT2016	15	Entered	54	Female	19OCT16	241	Placebo	<250 mg/day	No	No	<250 mg/day	No	Yes	Yes	Yes	Yes
Visit 2			Normal	Musculoskeletal	15_012	2	Yes	19OCT16	19OCT2016	15	Entered	54	Female	19OCT16	241	Placebo	<250 mg/day	No	No	<250 mg/day	No	Yes	Yes	Yes	Yes
Visit 2			Normal	Circulatory	15_012	2	Yes	19OCT16	19OCT2016	15	Entered	54	Female	19OCT16	241	Placebo	<250 mg/day	No	No	<250 mg/day	No	Yes	Yes	Yes	Yes
Visit 2			Normal	Neurologic	15_012	2	Yes	19OCT16	19OCT2016	15	Entered	54	Female	19OCT16	241	Placebo	<250 mg/day	No	No	<250 mg/day	No	Yes	Yes	Yes	Yes
Visit 2			Normal	Lymphatic	15_012	2	Yes	19OCT16	19OCT2016	15	Entered	54	Female	19OCT16	241	Placebo	<250 mg/day	No	No	<250 mg/day	No	Yes	Yes	Yes	Yes
Visit 2			Normal	Respiratory	15_012	2	Yes	19OCT16	19OCT2016	15	Entered	54	Female	19OCT16	241	Placebo	<250 mg/day	No	No	<250 mg/day	No	Yes	Yes	Yes	Yes
Visit 2			Not done	Other, specify	15_012	2	Yes	19OCT16	19OCT2016	15	Entered	54	Female	19OCT16	241	Placebo	<250 mg/day	No	No	<250 mg/day	No	Yes	Yes	Yes	Yes
Visit 2			Normal	General appearance	15_013	2	Yes	13OCT16	13OCT2016	15	Entered	58	Female	13OCT16	242	MF4637	<250 mg/day	No	No	>=250 mg/day	No	Yes	Yes	Yes	Yes
Visit 2			Normal	Head, eyes, ears and nose	15_013	2	Yes	13OCT16	13OCT2016	15	Entered	58	Female	13OCT16	242	MF4637	<250 mg/day	No	No	>=250 mg/day	No	Yes	Yes	Yes	Yes
Visit 2			Normal	Mouth, teeth and throat	15_013	2	Yes	13OCT16	13OCT2016	15	Entered	58	Female	13OCT16	242	MF4637	<250 mg/day	No	No	>=250 mg/day	No	Yes	Yes	Yes	Yes
Visit 2			Normal	Neck and thyroid	15_013	2	Yes	13OCT16	13OCT2016	15	Entered	58	Female	13OCT16	242	MF4637	<250 mg/day	No	No	>=250 mg/day	No	Yes	Yes	Yes	Yes
Visit 2			Normal	Chest	15_013	2	Yes	13OCT16	13OCT2016	15	Entered	58	Female	13OCT16	242	MF4637	<250 mg/day	No	No	>=250 mg/day	No	Yes	Yes	Yes	Yes
Visit 2			Normal	Heart	15_013	2	Yes	13OCT16	13OCT2016	15	Entered	58	Female	13OCT16	242	MF4637	<250 mg/day	No	No	>=250 mg/day	No	Yes	Yes	Yes	Yes
Visit 2			Normal	Abdomen	15_013	2	Yes	13OCT16	13OCT2016	15	Entered	58	Female	13OCT16	242	MF4637	<250 mg/day	No	No	>=250 mg/day	No	Yes	Yes	Yes	Yes
Visit 2			Normal	Dermatologic	15_013	2	Yes	13OCT16	13OCT2016	15	Entered	58	Female	13OCT16	242	MF4637	<250 mg/day	No	No	>=250 mg/day	No	Yes	Yes	Yes	Yes
Visit 2			Normal	Musculoskeletal	15_013	2	Yes	13OCT16	13OCT2016	15	Entered	58	Female	13OCT16	242	MF4637	<250 mg/day	No	No	>=250 mg/day	No	Yes	Yes	Yes	Yes
Visit 2			Normal	Circulatory	15_013	2	Yes	13OCT16	13OCT2016	15	Entered	58	Female	13OCT16	242	MF4637	<250 mg/day	No	No	>=250 mg/day	No	Yes	Yes	Yes	Yes
Visit 2			Normal	Neurologic	15_013	2	Yes	13OCT16	13OCT2016	15	Entered	58	Female	13OCT16	242	MF4637	<250 mg/day	No	No	>=250 mg/day	No	Yes	Yes	Yes	Yes
Visit 2			Normal	Lymphatic	15_013	2	Yes	13OCT16	13OCT2016	15	Entered	58	Female	13OCT16	242	MF4637	<250 mg/day	No	No	>=250 mg/day	No	Yes	Yes	Yes	Yes
Visit 2			Normal	Respiratory	15_013	2	Yes	13OCT16	13OCT2016	15	Entered	58	Female	13OCT16	242	MF4637	<250 mg/day	No	No	>=250 mg/day	No	Yes	Yes	Yes	Yes
Visit 2			Not done	Other, specify	15_013	2	Yes	13OCT16	13OCT2016	15	Entered	58	Female	13OCT16	242	MF4637	<250 mg/day	No	No	>=250 mg/day	No	Yes	Yes	Yes	Yes
Visit 2		Obese	Abnormal	General appearance	15_014	2	Yes	13OCT16	13OCT2016	15	Entered	55	Female	13OCT16	239	MF4637	<250 mg/day	No	No	>=250 mg/day	No	Yes	Yes	Yes	Yes
Visit 2			Normal	Head, eyes, ears and nose	15_014	2	Yes	13OCT16	13OCT2016	15	Entered	55	Female	13OCT16	239	MF4637	<250 mg/day	No	No	>=250 mg/day	No	Yes	Yes	Yes	Yes
Visit 2			Normal	Mouth, teeth and throat	15_014	2	Yes	13OCT16	13OCT2016	15	Entered	55	Female	13OCT16	239	MF4637	<250 mg/day	No	No	>=250 mg/day	No	Yes	Yes	Yes	Yes
Visit 2			Normal	Neck and thyroid	15_014	2	Yes	13OCT16	13OCT2016	15	Entered	55	Female	13OCT16	239	MF4637	<250 mg/day	No	No	>=250 mg/day	No	Yes	Yes	Yes	Yes
Visit 2			Normal	Chest	15_014	2	Yes	13OCT16	13OCT2016	15	Entered	55	Female	13OCT16	239	MF4637	<250 mg/day	No	No	>=250 mg/day	No	Yes	Yes	Yes	Yes
Visit 2			Normal	Heart	15_014	2	Yes	13OCT16	13OCT2016	15	Entered	55	Female	13OCT16	239	MF4637	<250 mg/day	No	No	>=250 mg/day	No	Yes	Yes	Yes	Yes
Visit 2			Normal	Abdomen	15_014	2	Yes	13OCT16	13OCT2016	15	Entered	55	Female	13OCT16	239	MF4637	<250 mg/day	No	No	>=250 mg/day	No	Yes	Yes	Yes	Yes
Visit 2			Normal	Dermatologic	15_014	2	Yes	13OCT16	13OCT2016	15	Entered	55	Female	13OCT16	239	MF4637	<250 mg/day	No	No	>=250 mg/day	No	Yes	Yes	Yes	Yes
Visit 2		Pain in knee	Abnormal	Musculoskeletal	15_014	2	Yes	13OCT16	13OCT2016	15	Entered	55	Female	13OCT16	239	MF4637	<250 mg/day	No	No	>=250 mg/day	No	Yes	Yes	Yes	Yes
Visit 2			Normal	Circulatory	15_014	2	Yes	13OCT16	13OCT2016	15	Entered	55	Female	13OCT16	239	MF4637	<250 mg/day	No	No	>=250 mg/day	No	Yes	Yes	Yes	Yes
Visit 2			Normal	Neurologic	15_014	2	Yes	13OCT16	13OCT2016	15	Entered	55	Female	13OCT16	239	MF4637	<250 mg/day	No	No	>=250 mg/day	No	Yes	Yes	Yes	Yes
Visit 2			Normal	Lymphatic	15_014	2	Yes	13OCT16	13OCT2016	15	Entered	55	Female	13OCT16	239	MF4637	<250 mg/day	No	No	>=250 mg/day	No	Yes	Yes	Yes	Yes
Visit 2			Normal	Respiratory	15_014	2	Yes	13OCT16	13OCT2016	15	Entered	55	Female	13OCT16	239	MF4637	<250 mg/day	No	No	>=250 mg/day	No	Yes	Yes	Yes	Yes
Visit 2			Not done	Other, specify	15_014	2	Yes	13OCT16	13OCT2016	15	Entered	55	Female	13OCT16	239	MF4637	<250 mg/day	No	No	>=250 mg/day	No	Yes	Yes	Yes	Yes
Visit 2			Normal	General appearance	15_015	2	Yes	09NOV16	09NOV2016	15	Entered	81	Female	09NOV16	268	MF4637	<250 mg/day	No	No	<250 mg/day	No	Yes	Yes	Yes	Yes
Visit 2			Normal	Head, eyes, ears and nose	15_015	2	Yes	09NOV16	09NOV2016	15	Entered	81	Female	09NOV16	268	MF4637	<250 mg/day	No	No	<250 mg/day	No	Yes	Yes	Yes	Yes
Visit 2			Normal	Mouth, teeth and throat	15_015	2	Yes	09NOV16	09NOV2016	15	Entered	81	Female	09NOV16	268	MF4637	<250 mg/day	No	No	<250 mg/day	No	Yes	Yes	Yes	Yes
Visit 2			Normal	Neck and thyroid	15_015	2	Yes	09NOV16	09NOV2016	15	Entered	81	Female	09NOV16	268	MF4637	<250 mg/day	No	No	<250 mg/day	No	Yes	Yes	Yes	Yes
Visit 2			Normal	Chest	15_015	2	Yes	09NOV16	09NOV2016	15	Entered	81	Female	09NOV16	268	MF4637	<250 mg/day	No	No	<250 mg/day	No	Yes	Yes	Yes	Yes
Visit 2			Normal	Heart	15_015	2	Yes	09NOV16	09NOV2016	15	Entered	81	Female	09NOV16	268	MF4637	<250 mg/day	No	No	<250 mg/day	No	Yes	Yes	Yes	Yes
Visit 2			Normal	Abdomen	15_015	2	Yes	09NOV16	09NOV2016	15	Entered	81	Female	09NOV16	268	MF4637	<250 mg/day	No	No	<250 mg/day	No	Yes	Yes	Yes	Yes
Visit 2			Normal	Dermatologic	15_015	2	Yes	09NOV16	09NOV2016	15	Entered	81	Female	09NOV16	268	MF4637	<250 mg/day	No	No	<250 mg/day	No	Yes	Yes	Yes	Yes
Visit 2			Normal	Musculoskeletal	15_015	2	Yes	09NOV16	09NOV2016	15	Entered	81	Female	09NOV16	268	MF4637	<250 mg/day	No	No	<250 mg/day	No	Yes	Yes	Yes	Yes
Visit 2			Normal	Circulatory	15_015	2	Yes	09NOV16	09NOV2016	15	Entered	81	Female	09NOV16	268	MF4637	<250 mg/day	No	No	<250 mg/day	No	Yes	Yes	Yes	Yes
Visit 2			Normal	Neurologic	15_015	2	Yes	09NOV16	09NOV2016	15	Entered	81	Female	09NOV16	268	MF4637	<250 mg/day	No	No	<250 mg/day	No	Yes	Yes	Yes	Yes
[truncated: 479 more rows]
