# Supplementary material for: Evaluation of a High Concentrate Omega-3 for Correcting the Omega-3 Fatty Acid Nutritional Deficiency in Non-alcoholic Fatty Liver Disease and effects on Hepatic Steatosis (CONDIN)
Source: Preprints.org preprint supplement (doi:10.20944/preprints201807.0240.v1), 2018-07-13
Supplement: Supplementary file 14 [file PK.xlsx]

## Sheet: PK
VISIT	EPAABS_O	DHAABS_O	EPAPCT_O	DHAPCT	RBC_N6	RBC_N3	VISITNUM	SUBJID	RBCDT	CDRBC	EPAABS	DHAABS	EPAPCT	EDABS	EDPCT	RBC_R	B_EPAABS	B_DHAABS	B_EPAPCT	B_DHAPCT	B_EDABS	B_EDPCT	B_RBC_R	D_EPAABS	D_DHAABS	D_EPAPCT	D_DHAPCT	D_EDABS	D_EDPCT	D_RBC_R	SITE	STATUS	AGE	SEX	FIRSTDT	RANDNO	TREAT	OMEGA	DIABETE	STATIN	OMEGA_C	SFFL	SAFETY	ITT	MITT	PP	RBCDAY
Baseline	2.67	18.33	0.41	2.55	37.24	5.44	Baseline	02_001	27OCT15	27OCT2015	2.67	18.33	0.41	21	2.96	6.84559	2.67	18.33	0.41	2.55	21	2.96	6.84559								02	Entered	57	Female	27OCT15	108	MF4637	<250 mg/day	Yes	Yes	<250 mg/day	No	Yes	Yes	Yes	Yes	1
Week 12	12.89	33.21	2.6	6.92	33.3	13.09	Week 12	02_001	15JAN16	15JAN2016	12.89	33.21	2.6	46.1	9.52	2.54393	2.67	18.33	0.41	2.55	21	2.96	6.84559	10.22	14.88	2.19	4.37	25.1	6.56	-4.30166	02	Entered	57	Female	27OCT15	108	MF4637	<250 mg/day	Yes	Yes	<250 mg/day	No	Yes	Yes	Yes	Yes	81
Week 24	11.22	38.11	2.2	7.5	31.37	13.32	Week 24	02_001	11APR16	11APR2016	11.22	38.11	2.2	49.33	9.7	2.35511	2.67	18.33	0.41	2.55	21	2.96	6.84559	8.55	19.78	1.79	4.95	28.33	6.74	-4.49048	02	Entered	57	Female	27OCT15	108	MF4637	<250 mg/day	Yes	Yes	<250 mg/day	No	Yes	Yes	Yes	Yes	168
Baseline	2.62	40.54	0.38	5.13	36.9	7.86	Baseline	02_002	05NOV15	05NOV2015	2.62	40.54	0.38	43.16	5.51	4.69466	2.62	40.54	0.38	5.13	43.16	5.51	4.69466								02	Entered	41	Male	06NOV15	109	MF4637	<250 mg/day	No	Yes	>=250 mg/day	No	Yes	Yes	Yes	Yes	-1
Week 12	7.19	42.63	1.52	8.74	33.82	13.95	Week 12	02_002	28JAN16	28JAN2016	7.19	42.63	1.52	49.82	10.26	2.42437	2.62	40.54	0.38	5.13	43.16	5.51	4.69466	4.57	2.09	1.14	3.61	6.66	4.75	-2.27028	02	Entered	41	Male	06NOV15	109	MF4637	<250 mg/day	No	Yes	>=250 mg/day	No	Yes	Yes	Yes	Yes	84
Week 24	6.16	32.55	1.51	7.92	32.85	12.91	Week 24	02_002	22APR16	22APR2016	6.16	32.55	1.51	38.71	9.43	2.54454	2.62	40.54	0.38	5.13	43.16	5.51	4.69466	3.54	-7.99	1.13	2.79	-4.45	3.92	-2.15012	02	Entered	41	Male	06NOV15	109	MF4637	<250 mg/day	No	Yes	>=250 mg/day	No	Yes	Yes	Yes	Yes	169
Baseline	2.72	35.91	0.38	4.57	35.37	7.62	Baseline	02_003	03NOV15	03NOV2015	2.72	35.91	0.38	38.63	4.95	4.64173	2.72	35.91	0.38	4.57	38.63	4.95	4.64173								02	Entered	58	Male	03NOV15	110	Placebo	>=250 mg/day	Yes	Yes	<250 mg/day	No	Yes	Yes	Yes	Yes	1
Week 12	4.74	33.19	0.82	6.56	35.22	10.4	Week 12	02_003	01FEB16	01FEB2016	4.74	33.19	0.82	37.93	7.38	3.38654	2.72	35.91	0.38	4.57	38.63	4.95	4.64173	2.02	-2.72	0.44	1.99	-0.7	2.43	-1.25519	02	Entered	58	Male	03NOV15	110	Placebo	>=250 mg/day	Yes	Yes	<250 mg/day	No	Yes	Yes	Yes	Yes	91
Week 24	2.84	29.67	0.54	6.44	35.02	9.77	Week 24	02_003	18APR16	18APR2016	2.84	29.67	0.54	32.51	6.98	3.58444	2.72	35.91	0.38	4.57	38.63	4.95	4.64173	0.12	-6.24	0.16	1.87	-6.12	2.03	-1.05729	02	Entered	58	Male	03NOV15	110	Placebo	>=250 mg/day	Yes	Yes	<250 mg/day	No	Yes	Yes	Yes	Yes	168
Baseline	1.96	13.42	0.54	3.24	36.37	7.76	Baseline	02_004	11NOV15	11NOV2015	1.96	13.42	0.54	15.38	3.78	4.68686	1.96	13.42	0.54	3.24	15.38	3.78	4.68686								02	Early Termination	60	Female	12NOV15	111	Placebo	<250 mg/day	Yes	Yes	<250 mg/day	No	Yes	Yes	Yes	Yes	-1
Week 12	2.21	14.66	0.57	4.12	37.37	8.73	Week 12	02_004	03FEB16	03FEB2016	2.21	14.66	0.57	16.87	4.69	4.28064	1.96	13.42	0.54	3.24	15.38	3.78	4.68686	0.25	1.24	0.03	0.88	1.49	0.91	-0.406214	02	Early Termination	60	Female	12NOV15	111	Placebo	<250 mg/day	Yes	Yes	<250 mg/day	No	Yes	Yes	Yes	Yes	84
Week 24	2.53	14.35	0.61	3.71	36.59	8.17	Week 24	02_004	01APR16	01APR2016	2.53	14.35	0.61	16.88	4.32	4.47858	1.96	13.42	0.54	3.24	15.38	3.78	4.68686	0.57	0.93	0.07	0.47	1.5	0.54	-0.208275	02	Early Termination	60	Female	12NOV15	111	Placebo	<250 mg/day	Yes	Yes	<250 mg/day	No	Yes	Yes	Yes	Yes	142
Baseline	1.83	30.98	0.4	5.7	35.37	9.6	Baseline	02_005	04DEC15	04DEC2015	1.83	30.98	0.4	32.81	6.1	3.68437	1.83	30.98	0.4	5.7	32.81	6.1	3.68437								02	Entered	65	Male	04DEC15	112	Placebo	>=250 mg/day	No	No	>=250 mg/day	No	Yes	Yes	Yes	Yes	1
Week 24	2.01	21.32	0.6	6.9	34.88	10.88	Week 24	02_005	20MAY16	20MAY2016	2.01	21.32	0.6	23.33	7.5	3.20588	1.83	30.98	0.4	5.7	32.81	6.1	3.68437	0.18	-9.66	0.2	1.2	-9.48	1.4	-0.478493	02	Entered	65	Male	04DEC15	112	Placebo	>=250 mg/day	No	No	>=250 mg/day	No	Yes	Yes	Yes	Yes	169
Retest	3.23	44.58	0.54	8.22	35.55	12.2	Retest	02_005	17MAR16	17MAR2016	3.23	44.58	0.54	47.81	8.76	2.91393	1.83	30.98	0.4	5.7	32.81	6.1	3.68437	1.4	13.6	0.14	2.52	15	2.66	-0.770441	02	Entered	65	Male	04DEC15	112	Placebo	>=250 mg/day	No	No	>=250 mg/day	No	Yes	Yes	Yes	Yes	105
Baseline	5.78	37.99	0.99	5.77	32.58	10.09	Baseline	03_001	19NOV15	19NOV2015	5.78	37.99	0.99	43.77	6.76	3.22894	5.78	37.99	0.99	5.77	43.77	6.76	3.22894								03	Early Termination	53	Male	19NOV15	117	MF4637	<250 mg/day	No	No	>=250 mg/day	No	Yes	Yes	No	No	1
Baseline	1.38	8.03	0.63	2.89	36.02	6.53	Baseline	03_002	30OCT15	30OCT2015	1.38	8.03	0.63	9.41	3.52	5.51608	1.38	8.03	0.63	2.89	9.41	3.52	5.51608								03	Early Termination	52	Female	30OCT15	116	Placebo	<250 mg/day	No	No	<250 mg/day	No	Yes	Yes	Yes	Yes	1
Early Termination	1.9	7.29	0.84	3.48	38.6	8.38	Early Termination	03_002	07APR16	07APR2016	1.9	7.29	0.84	9.19	4.32	4.60621	1.38	8.03	0.63	2.89	9.41	3.52	5.51608	0.52	-0.74	0.21	0.59	-0.22	0.8	-0.909874	03	Early Termination	52	Female	30OCT15	116	Placebo	<250 mg/day	No	No	<250 mg/day	No	Yes	Yes	Yes	Yes	161
Baseline		8.54	0.32	3.61	37.61	6.36	Baseline	03_003	24NOV15	24NOV2015	0.5	8.54	0.32	9.04	3.93	5.91352	0.5	8.54	0.32	3.61	9.04	3.93	5.91352								03	Entered	25	Male	24NOV15	121	MF4637	<250 mg/day	No	No	<250 mg/day	No	Yes	Yes	Yes	Yes	1
Week 12	4.46	28.54	0.92	6.2	35.15	10.45	Week 12	03_003	03MAR16	03MAR2016	4.46	28.54	0.92	33	7.12	3.36364	0.5	8.54	0.32	3.61	9.04	3.93	5.91352	3.96	20	0.6	2.59	23.96	3.19	-2.54989	03	Entered	25	Male	24NOV15	121	MF4637	<250 mg/day	No	No	<250 mg/day	No	Yes	Yes	Yes	Yes	101
Week 24	2.86	18.57	0.75	5.77	35.06	9.73	Week 24	03_003	01JUN16	01JUN2016	2.86	18.57	0.75	21.43	6.52	3.60329	0.5	8.54	0.32	3.61	9.04	3.93	5.91352	2.36	10.03	0.43	2.16	12.39	2.59	-2.31023	03	Entered	25	Male	24NOV15	121	MF4637	<250 mg/day	No	No	<250 mg/day	No	Yes	Yes	Yes	Yes	191
Baseline	1.19	9.35	0.47	3.08	36.94	6.19	Baseline	03_004	23NOV15	23NOV2015	1.19	9.35	0.47	10.54	3.55	5.96769	1.19	9.35	0.47	3.08	10.54	3.55	5.96769								03	Entered	56	Female	24NOV15	118	Placebo	<250 mg/day	No	No	>=250 mg/day	No	Yes	Yes	Yes	Yes	-1
Week 12	1.3	12.33	0.43	4.27	37.86	7.67	Week 12	03_004	16FEB16	16FEB2016	1.3	12.33	0.43	13.63	4.7	4.93611	1.19	9.35	0.47	3.08	10.54	3.55	5.96769	0.11	2.98	-0.04	1.19	3.09	1.15	-1.03158	03	Entered	56	Female	24NOV15	118	Placebo	<250 mg/day	No	No	>=250 mg/day	No	Yes	Yes	Yes	Yes	85
Week 24		6.56	0.42	4.05	37.68	7.02	Week 24	03_004	10MAY16	10MAY2016	0.5	6.56	0.42	7.06	4.47	5.36752	1.19	9.35	0.47	3.08	10.54	3.55	5.96769	-0.69	-2.79	-0.05	0.97	-3.48	0.92	-0.600168	03	Entered	56	Female	24NOV15	118	Placebo	<250 mg/day	No	No	>=250 mg/day	No	Yes	Yes	Yes	Yes	169
Baseline	3.98	22.02	0.62	3.1	37.87	6.85	Baseline	03_005	24NOV15	24NOV2015	3.98	22.02	0.62	26	3.72	5.52847	3.98	22.02	0.62	3.1	26	3.72	5.52847								03	Early Termination	49	Female	25NOV15	119	MF4637	>=250 mg/day	No	No	<250 mg/day	No	Yes	Yes	Yes	Yes	-1
Early Termination	1.33	6.23	0.99	4.89	37.87	9.83	Early Termination	03_005	07APR16	07APR2016	1.33	6.23	0.99	7.56	5.88	3.85249	3.98	22.02	0.62	3.1	26	3.72	5.52847	-2.65	-15.79	0.37	1.79	-18.44	2.16	-1.67597	03	Early Termination	49	Female	25NOV15	119	MF4637	>=250 mg/day	No	No	<250 mg/day	No	Yes	Yes	Yes	Yes	135
Baseline				3.58	39.58	6.06	Baseline	03_007	18NOV15	18NOV2015	0.5	0.5	0.01	1	3.59	6.53135	0.5	0.5	0.01	3.58	1	3.59	6.53135								03	Entered	40	Male	19NOV15	120	Placebo	<250 mg/day	No	No	<250 mg/day	No	Yes	Yes	Yes	No	-1
Week 24			0.47	4.25	37.75	7.12	Week 24	03_007	01JUN16	01JUN2016	0.5	0.5	0.47	1	4.72	5.30197	0.5	0.5	0.01	3.58	1	3.59	6.53135	0	0	0.46	0.67	0	1.13	-1.22939	03	Entered	40	Male	19NOV15	120	Placebo	<250 mg/day	No	No	<250 mg/day	No	Yes	Yes	Yes	No	196
Unscheduled	1.01	8.7	0.43	3.96	39.3	6.94	Unscheduled Visit	03_007	02MAR16	02MAR2016	1.01	8.7	0.43	9.71	4.39	5.66282	0.5	0.5	0.01	3.58	1	3.59	6.53135	0.51	8.2	0.42	0.38	8.71	0.8	-0.868529	03	Entered	40	Male	19NOV15	120	Placebo	<250 mg/day	No	No	<250 mg/day	No	Yes	Yes	Yes	No	105
Baseline	1.13	12.06	0.24	2.09	39.09	4.84	Baseline	03_009	12JAN16	12JAN2016	1.13	12.06	0.24	13.19	2.33	8.07645	1.13	12.06	0.24	2.09	13.19	2.33	8.07645								03	Entered	40	Male	13JAN16	122	MF4637	<250 mg/day	No	No	>=250 mg/day	No	Yes	Yes	Yes	Yes	-1
Week 12	4.54	16.1	2	6.87	33.99	12.69	Week 12	03_009	29MAR16	29MAR2016	4.54	16.1	2	20.64	8.87	2.67849	1.13	12.06	0.24	2.09	13.19	2.33	8.07645	3.41	4.04	1.76	4.78	7.45	6.54	-5.39796	03	Entered	40	Male	13JAN16	122	MF4637	<250 mg/day	No	No	>=250 mg/day	No	Yes	Yes	Yes	Yes	77
Week 24	2.5	9.63	1.65	6.79	32.93	12.49	Week 24	03_009	29JUN16	29JUN2016	2.5	9.63	1.65	12.13	8.44	2.63651	1.13	12.06	0.24	2.09	13.19	2.33	8.07645	1.37	-2.43	1.41	4.7	-1.06	6.11	-5.43994	03	Entered	40	Male	13JAN16	122	MF4637	<250 mg/day	No	No	>=250 mg/day	No	Yes	Yes	Yes	Yes	169
Baseline	3.77	22.25	0.92	4.88	34.97	8.9	Baseline	03_010	12JAN16	12JAN2016	3.77	22.25	0.92	26.02	5.8	3.92921	3.77	22.25	0.92	4.88	26.02	5.8	3.92921								03	Entered	41	Male	12JAN16	123	Placebo	>=250 mg/day	No	No	>=250 mg/day	No	Yes	Yes	Yes	Yes	1
Week 12	2.18	11.64	1.07	5.99	36.33	10.81	Week 12	03_010	25MAR16	25MAR2016	2.18	11.64	1.07	13.82	7.06	3.36078	3.77	22.25	0.92	4.88	26.02	5.8	3.92921	-1.59	-10.61	0.15	1.11	-12.2	1.26	-0.568436	03	Entered	41	Male	12JAN16	123	Placebo	>=250 mg/day	No	No	>=250 mg/day	No	Yes	Yes	Yes	Yes	74
Week 24	2.78	17.34	0.83	5.7	35.77	9.79	Week 24	03_010	24JUN16	24JUN2016	2.78	17.34	0.83	20.12	6.53	3.65373	3.77	22.25	0.92	4.88	26.02	5.8	3.92921	-0.99	-4.91	-0.09	0.82	-5.9	0.73	-0.275485	03	Entered	41	Male	12JAN16	123	Placebo	>=250 mg/day	No	No	>=250 mg/day	No	Yes	Yes	Yes	Yes	165
Baseline		5.72	0.62	2.88	39.42	6.76	Baseline	03_011	10FEB16	10FEB2016	0.5	5.72	0.62	6.22	3.5	5.83136	0.5	5.72	0.62	2.88	6.22	3.5	5.83136								03	Entered	55	Male	11FEB16	188	MF4637	<250 mg/day	No	Yes	<250 mg/day	No	Yes	Yes	Yes	Yes	-1
Week 12	3.13	10.67	2.09	6.22	35.39	12.8	Week 12	03_011	17MAY16	17MAY2016	3.13	10.67	2.09	13.8	8.31	2.76484	0.5	5.72	0.62	2.88	6.22	3.5	5.83136	2.63	4.95	1.47	3.34	7.58	4.81	-3.06652	03	Entered	55	Male	11FEB16	188	MF4637	<250 mg/day	No	Yes	<250 mg/day	No	Yes	Yes	Yes	Yes	97
Week 24	4.28	15.02	1.52	5.61	33.66	11.48	Week 24	03_011	01AUG16	01AUG2016	4.28	15.02	1.52	19.3	7.13	2.93206	0.5	5.72	0.62	2.88	6.22	3.5	5.83136	3.78	9.3	0.9	2.73	13.08	3.63	-2.89931	03	Entered	55	Male	11FEB16	188	MF4637	<250 mg/day	No	Yes	<250 mg/day	No	Yes	Yes	Yes	Yes	173
Baseline	2.07	19.35	0.44	3.37	36.37	6.52	Baseline	03_012	11FEB16	11FEB2016	2.07	19.35	0.44	21.42	3.81	5.57822	2.07	19.35	0.44	3.37	21.42	3.81	5.57822								03	Entered	63	Male	12FEB16	190	MF4637	<250 mg/day	No	Yes	<250 mg/day	No	Yes	Yes	Yes	Yes	-1
Week 12	6.58	20.34	2.53	7.79	32.24	14.55	Week 12	03_012	13MAY16	13MAY2016	6.58	20.34	2.53	26.92	10.32	2.21581	2.07	19.35	0.44	3.37	21.42	3.81	5.57822	4.51	0.99	2.09	4.42	5.5	6.51	-3.36241	03	Entered	63	Male	12FEB16	190	MF4637	<250 mg/day	No	Yes	<250 mg/day	No	Yes	Yes	Yes	Yes	92
Week 24	3.38	11.74	2.52	8.55	30.68	15.36	Week 24	03_012	01AUG16	01AUG2016	3.38	11.74	2.52	15.12	11.07	1.9974	2.07	19.35	0.44	3.37	21.42	3.81	5.57822	1.31	-7.61	2.08	5.18	-6.3	7.26	-3.58083	03	Entered	63	Male	12FEB16	190	MF4637	<250 mg/day	No	Yes	<250 mg/day	No	Yes	Yes	Yes	Yes	172
Baseline	1.95	17.5	0.54	4	36.34	7.26	Baseline	03_013	10FEB16	10FEB2016	1.95	17.5	0.54	19.45	4.54	5.00551	1.95	17.5	0.54	4	19.45	4.54	5.00551								03	Entered	61	Female	11FEB16	189	Placebo	<250 mg/day	No	Yes	<250 mg/day	No	Yes	Yes	Yes	Yes	-1
Week 12	1.44	11.58	0.72	5.54	37.24	9.18	Week 12	03_013	10MAY16	10MAY2016	1.44	11.58	0.72	13.02	6.26	4.05664	1.95	17.5	0.54	4	19.45	4.54	5.00551	-0.51	-5.92	0.18	1.54	-6.43	1.72	-0.948865	03	Entered	61	Female	11FEB16	189	Placebo	<250 mg/day	No	Yes	<250 mg/day	No	Yes	Yes	Yes	Yes	90
Week 24	2.46	17.14	0.57	4.53	36.43	8.03	Week 24	03_013	25JUL16	25JUL2016	2.46	17.14	0.57	19.6	5.1	4.53674	1.95	17.5	0.54	4	19.45	4.54	5.00551	0.51	-0.36	0.03	0.53	0.15	0.56	-0.468772	03	Entered	61	Female	11FEB16	189	Placebo	<250 mg/day	No	Yes	<250 mg/day	No	Yes	Yes	Yes	Yes	166
Baseline	1.54	16.91	0.56	4.63	37.79	8.42	Baseline	04_001	13OCT15	13OCT2015	1.54	16.91	0.56	18.45	5.19	4.48812	1.54	16.91	0.56	4.63	18.45	5.19	4.48812								04	Entered	49	Female	13OCT15	124	Placebo	>=250 mg/day	Yes	No	>=250 mg/day	No	Yes	Yes	Yes	Yes	1
Week 12	1.5	18.59	0.38	4.88	39.56	8.29	Week 12	04_001	08JAN16	08JAN2016	1.5	18.59	0.38	20.09	5.26	4.77201	1.54	16.91	0.56	4.63	18.45	5.19	4.48812	-0.04	1.68	-0.18	0.25	1.64	0.07	0.283891	04	Entered	49	Female	13OCT15	124	Placebo	>=250 mg/day	Yes	No	>=250 mg/day	No	Yes	Yes	Yes	Yes	88
Week 24	1.35	16.93	0.32	4.52	38.65	7.49	Week 24	04_001	01APR16	01APR2016	1.35	16.93	0.32	18.28	4.84	5.16021	1.54	16.91	0.56	4.63	18.45	5.19	4.48812	-0.19	0.02	-0.24	-0.11	-0.17	-0.35	0.67209	04	Entered	49	Female	13OCT15	124	Placebo	>=250 mg/day	Yes	No	>=250 mg/day	No	Yes	Yes	Yes	Yes	172
Baseline	3.63	22.21	0.89	4.86	35.37	9.01	Baseline	04_004	14OCT15	14OCT2015	3.63	22.21	0.89	25.84	5.75	3.92564	3.63	22.21	0.89	4.86	25.84	5.75	3.92564								04	Entered	34	Male	15OCT15	125	MF4637	<250 mg/day	No	No	<250 mg/day	No	Yes	Yes	Yes	No	-1
Week 12	15.96	35.85	3.53	7.74	30.3	16.07	Week 12	04_004	08JAN16	08JAN2016	15.96	35.85	3.53	51.81	11.27	1.8855	3.63	22.21	0.89	4.86	25.84	5.75	3.92564	12.33	13.64	2.64	2.88	25.97	5.52	-2.04014	04	Entered	34	Male	15OCT15	125	MF4637	<250 mg/day	No	No	<250 mg/day	No	Yes	Yes	Yes	No	86
Week 24	7.14	23.42	2.14	7.09	31.09	13.83	Week 24	04_004	31MAR16	31MAR2016	7.14	23.42	2.14	30.56	9.23	2.24801	3.63	22.21	0.89	4.86	25.84	5.75	3.92564	3.51	1.21	1.25	2.23	4.72	3.48	-1.67763	04	Entered	34	Male	15OCT15	125	MF4637	<250 mg/day	No	No	<250 mg/day	No	Yes	Yes	Yes	No	169
Baseline	2.54	20.65	0.53	3.8	35.54	7.51	Baseline	04_009	04JAN16	04JAN2016	2.54	20.65	0.53	23.19	4.33	4.73236	2.54	20.65	0.53	3.8	23.19	4.33	4.73236								04	Entered	53	Female	04JAN16	127	Placebo	<250 mg/day	No	No	<250 mg/day	No	Yes	Yes	Yes	Yes	1
Week 12	2.24	15.62	0.57	4.14	35.87	8.11	Week 12	04_009	25MAR16	25MAR2016	2.24	15.62	0.57	17.86	4.71	4.42293	2.54	20.65	0.53	3.8	23.19	4.33	4.73236	-0.3	-5.03	0.04	0.34	-5.33	0.38	-0.309422	04	Entered	53	Female	04JAN16	127	Placebo	<250 mg/day	No	No	<250 mg/day	No	Yes	Yes	Yes	Yes	82
Baseline	2.79	20.61	0.8	5.04	36.06	8.36	Baseline	04_010	05JAN16	05JAN2016	2.79	20.61	0.8	23.4	5.84	4.3134	2.79	20.61	0.8	5.04	23.4	5.84	4.3134								04	Entered	25	Female	05JAN16	126	MF4637	>=250 mg/day	No	No	>=250 mg/day	No	Yes	Yes	Yes	Yes	1
Week 12	10.79	26.43	3.27	8.11	31.05	15.53	Week 12	04_010	30MAR16	30MAR2016	10.79	26.43	3.27	37.22	11.38	1.99936	2.79	20.61	0.8	5.04	23.4	5.84	4.3134	8	5.82	2.47	3.07	13.82	5.54	-2.31404	04	Entered	25	Female	05JAN16	126	MF4637	>=250 mg/day	No	No	>=250 mg/day	No	Yes	Yes	Yes	Yes	86
Week 24	12.72	32.35	3.11	7.91	30.11	15.07	Week 24	04_010	22JUN16	22JUN2016	12.72	32.35	3.11	45.07	11.02	1.99801	2.79	20.61	0.8	5.04	23.4	5.84	4.3134	9.93	11.74	2.31	2.87	21.67	5.18	-2.31539	04	Entered	25	Female	05JAN16	126	MF4637	>=250 mg/day	No	No	>=250 mg/day	No	Yes	Yes	Yes	Yes	170
Baseline	1.35	17.09	0.39	4.16	37.99	7.18	Baseline	04_011	26JAN16	26JAN2016	1.35	17.09	0.39	18.44	4.55	5.29109	1.35	17.09	0.39	4.16	18.44	4.55	5.29109								04	Entered	41	Male	26JAN16	129	Placebo	>=250 mg/day	No	No	>=250 mg/day	No	Yes	Yes	Yes	Yes	1
Week 12	1.62	14.81	0.42	4.35	39.63	7.62	Week 12	04_011	19APR16	19APR2016	1.62	14.81	0.42	16.43	4.77	5.20079	1.35	17.09	0.39	4.16	18.44	4.55	5.29109	0.27	-2.28	0.03	0.19	-2.01	0.22	-0.0902989	04	Entered	41	Male	26JAN16	129	Placebo	>=250 mg/day	No	No	>=250 mg/day	No	Yes	Yes	Yes	Yes	85
Week 24	1.29	13.25	0.33	4.03	39.16	7.13	Week 24	04_011	12JUL16	12JUL2016	1.29	13.25	0.33	14.54	4.36	5.49229	1.35	17.09	0.39	4.16	18.44	4.55	5.29109	-0.06	-3.84	-0.06	-0.13	-3.9	-0.19	0.2012	04	Entered	41	Male	26JAN16	129	Placebo	>=250 mg/day	No	No	>=250 mg/day	No	Yes	Yes	Yes	Yes	169
Baseline	1.39	15.02	0.38	3.19	38.29	6.11	Baseline	04_012	18JAN16	18JAN2016	1.39	15.02	0.38	16.41	3.57	6.26678	1.39	15.02	0.38	3.19	16.41	3.57	6.26678								04	Entered	19	Male	19JAN16	128	Placebo	<250 mg/day	No	No	<250 mg/day	No	Yes	Yes	Yes	Yes	-1
Week 12	1.58	14.42	0.37	3.77	39.9	7.01	Week 12	04_012	14APR16	14APR2016	1.58	14.42	0.37	16	4.14	5.69187	1.39	15.02	0.38	3.19	16.41	3.57	6.26678	0.19	-0.6	-0.01	0.58	-0.41	0.57	-0.574907	04	Entered	19	Male	19JAN16	128	Placebo	<250 mg/day	No	No	<250 mg/day	No	Yes	Yes	Yes	Yes	87
Week 24	1.47	13.98	0.36	3.54	38.29	6.57	Week 24	04_012	05JUL16	05JUL2016	1.47	13.98	0.36	15.45	3.9	5.82801	1.39	15.02	0.38	3.19	16.41	3.57	6.26678	0.08	-1.04	-0.02	0.35	-0.96	0.33	-0.43877	04	Entered	19	Male	19JAN16	128	Placebo	<250 mg/day	No	No	<250 mg/day	No	Yes	Yes	Yes	Yes	169
Baseline	1.25	16.67	0.31	3.33	39.07	6.02	Baseline	04_013	15FEB16	15FEB2016	1.25	16.67	0.31	17.92	3.64	6.49003	1.25	16.67	0.31	3.33	17.92	3.64	6.49003								04	Entered	64	Female	15FEB16	130	MF4637	<250 mg/day	No	Yes	<250 mg/day	No	Yes	Yes	Yes	Yes	1
Week 12	2.05	16.86	0.56	4.84	38.29	8.11	Week 12	04_013	09MAY16	09MAY2016	2.05	16.86	0.56	18.91	5.4	4.72133	1.25	16.67	0.31	3.33	17.92	3.64	6.49003	0.8	0.19	0.25	1.51	0.99	1.76	-1.7687	04	Entered	64	Female	15FEB16	130	MF4637	<250 mg/day	No	Yes	<250 mg/day	No	Yes	Yes	Yes	Yes	85
Week 24	51.97	59.19	1.64	1.86	46.19	4.26	Week 24	04_013	01AUG16	01AUG2016	51.97	59.19	1.64	111.16	3.5	10.8427	1.25	16.67	0.31	3.33	17.92	3.64	6.49003	50.72	42.52	1.33	-1.47	93.24	-0.14	4.35269	04	Entered	64	Female	15FEB16	130	MF4637	<250 mg/day	No	Yes	<250 mg/day	No	Yes	Yes	Yes	Yes	169
Retest	1.68	15.7	0.46	4.87	39.2	7.74	Retest	04_013	09MAY16	09MAY2016	1.68	15.7	0.46	17.38	5.33	5.0646	1.25	16.67	0.31	3.33	17.92	3.64	6.49003	0.43	-0.97	0.15	1.54	-0.54	1.69	-1.42543	04	Entered	64	Female	15FEB16	130	MF4637	<250 mg/day	No	Yes	<250 mg/day	No	Yes	Yes	Yes	Yes	85
Baseline	1.75	17.03	0.41	3.52	36.04	7.3	Baseline	04_014	25FEB16	25FEB2016	1.75	17.03	0.41	18.78	3.93	4.93699	1.75	17.03	0.41	3.52	18.78	3.93	4.93699								04	Entered	35	Female	25FEB16	131	MF4637	>=250 mg/day	No	No	>=250 mg/day	No	Yes	Yes	Yes	Yes	1
Week 12	1.94	15.91	0.48	4.11	37.06	8.33	Week 12	04_014	19MAY16	19MAY2016	1.94	15.91	0.48	17.85	4.59	4.44898	1.75	17.03	0.41	3.52	18.78	3.93	4.93699	0.19	-1.12	0.07	0.59	-0.93	0.66	-0.488007	04	Entered	35	Female	25FEB16	131	MF4637	>=250 mg/day	No	No	>=250 mg/day	No	Yes	Yes	Yes	Yes	85
Week 24	2.02	14.19	0.44	3.53	36.25	7.59	Week 24	04_014	08AUG16	08AUG2016	2.02	14.19	0.44	16.21	3.97	4.77602	1.75	17.03	0.41	3.52	18.78	3.93	4.93699	0.27	-2.84	0.03	0.01	-2.57	0.04	-0.160965	04	Entered	35	Female	25FEB16	131	MF4637	>=250 mg/day	No	No	>=250 mg/day	No	Yes	Yes	Yes	Yes	166
Baseline	1.32	27.57	0.37	6.33	37.49	9.03	Baseline	04_015	21MAR16	21MAR2016	1.32	27.57	0.37	28.89	6.7	4.15172	1.32	27.57	0.37	6.33	28.89	6.7	4.15172								04	Entered	50	Male	21MAR16	198	Placebo	<250 mg/day	No	Yes	<250 mg/day	No	Yes	Yes	Yes	No	1
Week 12	1.48	27.61	0.39	7.9	37.06	10.8	Week 12	04_015	16JUN16	16JUN2016	1.48	27.61	0.39	29.09	8.29	3.43148	1.32	27.57	0.37	6.33	28.89	6.7	4.15172	0.16	0.04	0.02	1.57	0.2	1.59	-0.720235	04	Entered	50	Male	21MAR16	198	Placebo	<250 mg/day	No	Yes	<250 mg/day	No	Yes	Yes	Yes	No	88
Week 24	1.39	26.71	0.29	6.92	37.73	9.47	Week 24	04_015	04NOV16	04NOV2016	1.39	26.71	0.29	28.1	7.21	3.98416	1.32	27.57	0.37	6.33	28.89	6.7	4.15172	0.07	-0.86	-0.08	0.59	-0.79	0.51	-0.167556	04	Entered	50	Male	21MAR16	198	Placebo	<250 mg/day	No	Yes	<250 mg/day	No	Yes	Yes	Yes	No	229
Baseline	1.8	15.86	0.57	3.91	37.66	7.07	Baseline	04_018	02AUG16	02AUG2016	1.8	15.86	0.57	17.66	4.48	5.32673	1.8	15.86	0.57	3.91	17.66	4.48	5.32673								04	Early Termination	37	Male		197	MF4637	<250 mg/day	No	No	<250 mg/day	No	No	Yes	No	No
Baseline	1.79	11	0.55	2.82	37.99	6.05	Baseline	04_019	02AUG16	02AUG2016	1.79	11	0.55	12.79	3.37	6.27934	1.79	11	0.55	2.82	12.79	3.37	6.27934								04	Early Termination	50	Female		200	Placebo	<250 mg/day	No	No	<250 mg/day	No	No	Yes	No	No
Baseline	1.83	21.23	0.59	5.44	35.98	8.55	Baseline	04_020	28JUL16	28JUL2016	1.83	21.23	0.59	23.06	6.03	4.20819	1.83	21.23	0.59	5.44	23.06	6.03	4.20819								04	Entered	44	Male	28JUL16	196	MF4637	<250 mg/day	Yes	No	<250 mg/day	No	Yes	Yes	Yes	Yes	1
Week 12	2.3	19.39	0.69	6.87	36.66	10.5	Week 12	04_020	26OCT16	26OCT2016	2.3	19.39	0.69	21.69	7.56	3.49143	1.83	21.23	0.59	5.44	23.06	6.03	4.20819	0.47	-1.84	0.1	1.43	-1.37	1.53	-0.716759	04	Entered	44	Male	28JUL16	196	MF4637	<250 mg/day	Yes	No	<250 mg/day	No	Yes	Yes	Yes	Yes	91
Week 24	2.11	20.54	0.37	4.28	29.72	6.73	Week 24	04_020	12JAN17	12JAN2017	2.11	20.54	0.37	22.65	4.65	4.41605	1.83	21.23	0.59	5.44	23.06	6.03	4.20819	0.28	-0.69	-0.22	-1.16	-0.41	-1.38	0.20786	04	Entered	44	Male	28JUL16	196	MF4637	<250 mg/day	Yes	No	<250 mg/day	No	Yes	Yes	Yes	Yes	169
Baseline	1.74	14.65	0.59	3.99	35.79	7.91	Baseline	04_022	28JUL16	28JUL2016	1.74	14.65	0.59	16.39	4.58	4.52465	1.74	14.65	0.59	3.99	16.39	4.58	4.52465								04	Entered	44	Female	28JUL16	199	Placebo	>=250 mg/day	No	No	>=250 mg/day	No	Yes	Yes	Yes	Yes	1
Week 12	1.87	16.49	0.49	4.84	36.71	8.86	Week 12	04_022	20OCT16	20OCT2016	1.87	16.49	0.49	18.36	5.33	4.14334	1.74	14.65	0.59	3.99	16.39	4.58	4.52465	0.13	1.84	-0.1	0.85	1.97	0.75	-0.381311	04	Entered	44	Female	28JUL16	199	Placebo	>=250 mg/day	No	No	>=250 mg/day	No	Yes	Yes	Yes	Yes	85
Week 24	1.47	11.56	0.36	3.15	31.5	6.22	Week 24	04_022	12JAN17	12JAN2017	1.47	11.56	0.36	13.03	3.51	5.06431	1.74	14.65	0.59	3.99	16.39	4.58	4.52465	-0.27	-3.09	-0.23	-0.84	-3.36	-1.07	0.539656	04	Entered	44	Female	28JUL16	199	Placebo	>=250 mg/day	No	No	>=250 mg/day	No	Yes	Yes	Yes	Yes	169
Baseline	2.86	28.24	0.79	6.21	35.6	9.83	Baseline	04_023	17AUG16	17AUG2016	2.86	28.24	0.79	31.1	7	3.62157	2.86	28.24	0.79	6.21	31.1	7	3.62157								04	Entered	56	Male	17AUG16	202	MF4637	>=250 mg/day	No	No	>=250 mg/day	No	Yes	Yes	Yes	Yes	1
Week 12	5.29	33.77	1.33	8.93	33.73	14.1	Week 12	04_023	04NOV16	04NOV2016	5.29	33.77	1.33	39.06	10.26	2.3922	2.86	28.24	0.79	6.21	31.1	7	3.62157	2.43	5.53	0.54	2.72	7.96	3.26	-1.22937	04	Entered	56	Male	17AUG16	202	MF4637	>=250 mg/day	No	No	>=250 mg/day	No	Yes	Yes	Yes	Yes	80
Week 24	4.32	30.27	1.19	8.41	38.1	13.01	Week 24	04_023	27JAN17	27JAN2017	4.32	30.27	1.19	34.59	9.6	2.92852	2.86	28.24	0.79	6.21	31.1	7	3.62157	1.46	2.03	0.4	2.2	3.49	2.6	-0.69305	04	Entered	56	Male	17AUG16	202	MF4637	>=250 mg/day	No	No	>=250 mg/day	No	Yes	Yes	Yes	Yes	164
Baseline		14.69	0.27	3.45	37.84	6.11	Baseline	04_025	25AUG16	25AUG2016	0.5	14.69	0.27	15.19	3.72	6.19313	0.5	14.69	0.27	3.45	15.19	3.72	6.19313								04	Entered	49	Male	25AUG16	203	MF4637	<250 mg/day	No	No	<250 mg/day	No	Yes	Yes	Yes	Yes	1
Week 12	1.15	14.72	0.51	6.48	35.52	10.08	Week 12	04_025	18NOV16	18NOV2016	1.15	14.72	0.51	15.87	6.99	3.52381	0.5	14.69	0.27	3.45	15.19	3.72	6.19313	0.65	0.03	0.24	3.03	0.68	3.27	-2.66932	04	Entered	49	Male	25AUG16	203	MF4637	<250 mg/day	No	No	<250 mg/day	No	Yes	Yes	Yes	Yes	86
Week 24	1.4	17.05	0.31	4.01	40.17	6.64	Week 24	04_025	14FEB17	14FEB2017	1.4	17.05	0.31	18.45	4.32	6.0497	0.5	14.69	0.27	3.45	15.19	3.72	6.19313	0.9	2.36	0.04	0.56	3.26	0.6	-0.143427	04	Entered	49	Male	25AUG16	203	MF4637	<250 mg/day	No	No	<250 mg/day	No	Yes	Yes	Yes	Yes	174
Baseline	1.44	16.46	0.42	3.74	39.06	6.82	Baseline	04_027	26AUG16	26AUG2016	1.44	16.46	0.42	17.9	4.16	5.72727	1.44	16.46	0.42	3.74	17.9	4.16	5.72727								04	Early Termination	39	Female		201	Placebo	>=250 mg/day	No	No	>=250 mg/day	No	No	Yes	No	No
Early Termination	1.89	14.81	0.52	4.66	41	8.28	Early Termination	04_027	02DEC16	02DEC2016	1.89	14.81	0.52	16.7	5.18	4.95169	1.44	16.46	0.42	3.74	17.9	4.16	5.72727	0.45	-1.65	0.1	0.92	-1.2	1.02	-0.775582	04	Early Termination	39	Female		201	Placebo	>=250 mg/day	No	No	>=250 mg/day	No	No	Yes	No	No
Baseline	1.09	14.7	0.39	4.15	35.84	7.04	Baseline	04_030	15SEP16	15SEP2016	1.09	14.7	0.39	15.79	4.54	5.09091	1.09	14.7	0.39	4.15	15.79	4.54	5.09091								04	Entered	67	Female	15SEP16	216	MF4637	>=250 mg/day	Yes	No	>=250 mg/day	No	Yes	Yes	Yes	Yes	1
Week 12	1.09	11.78	0.39	4.65	36.95	7.52	Week 12	04_030	06DEC16	06DEC2016	1.09	11.78	0.39	12.87	5.04	4.91356	1.09	14.7	0.39	4.15	15.79	4.54	5.09091	0	-2.92	0	0.5	-2.92	0.5	-0.177345	04	Entered	67	Female	15SEP16	216	MF4637	>=250 mg/day	Yes	No	>=250 mg/day	No	Yes	Yes	Yes	Yes	83
Week 24	1.44	16.72	0.33	4.55	37.25	7.26	Week 24	04_030	28FEB17	28FEB2017	1.44	16.72	0.33	18.16	4.88	5.13085	1.09	14.7	0.39	4.15	15.79	4.54	5.09091	0.35	2.02	-0.06	0.4	2.37	0.34	0.0399449	04	Entered	67	Female	15SEP16	216	MF4637	>=250 mg/day	Yes	No	>=250 mg/day	No	Yes	Yes	Yes	Yes	167
Baseline		12.14	0.32	3.36	38.58	6.26	Baseline	04_031	22SEP16	22SEP2016	0.5	12.14	0.32	12.64	3.68	6.16294	0.5	12.14	0.32	3.36	12.64	3.68	6.16294								04	Entered	56	Male	22SEP16	217	Placebo	<250 mg/day	Yes	No	<250 mg/day	No	Yes	Yes	Yes	Yes	1
Week 12	1.01	10.88	0.29	3.84	39.28	6.74	Week 12	04_031	08DEC16	08DEC2016	1.01	10.88	0.29	11.89	4.13	5.82789	0.5	12.14	0.32	3.36	12.64	3.68	6.16294	0.51	-1.26	-0.03	0.48	-0.75	0.45	-0.335046	04	Entered	56	Male	22SEP16	217	Placebo	<250 mg/day	Yes	No	<250 mg/day	No	Yes	Yes	Yes	Yes	78
Week 24	1.22	16.78	0.21	3.49	40.23	5.96	Week 24	04_031	08MAR17	08MAR2017	1.22	16.78	0.21	18	3.7	6.75	0.5	12.14	0.32	3.36	12.64	3.68	6.16294	0.72	4.64	-0.11	0.13	5.36	0.02	0.587061	04	Entered	56	Male	22SEP16	217	Placebo	<250 mg/day	Yes	No	<250 mg/day	No	Yes	Yes	Yes	Yes	168
Baseline	1.68	8.34	0.53	2.22	36.32	6.09	Baseline	04_032	22SEP16	22SEP2016	1.68	8.34	0.53	10.02	2.75	5.96388	1.68	8.34	0.53	2.22	10.02	2.75	5.96388								04	Early Termination	53	Female	22SEP16	218	MF4637	<250 mg/day	No	No	<250 mg/day	No	Yes	Yes	No	No	1
Baseline	2.55	22.39	0.76	6.06	35.07	9.6	Baseline	04_035	10OCT16	10OCT2016	2.55	22.39	0.76	24.94	6.82	3.65313	2.55	22.39	0.76	6.06	24.94	6.82	3.65313								04	Entered	59	Female	10OCT16	219	Placebo	>=250 mg/day	No	No	>=250 mg/day	No	Yes	Yes	Yes	Yes	1
Week 12	3.02	21.78	0.81	6.43	36.02	9.87	Week 12	04_035	03JAN17	03JAN2017	3.02	21.78	0.81	24.8	7.24	3.64944	2.55	22.39	0.76	6.06	24.94	6.82	3.65313	0.47	-0.61	0.05	0.37	-0.14	0.42	-0.00368224	04	Entered	59	Female	10OCT16	219	Placebo	>=250 mg/day	No	No	>=250 mg/day	No	Yes	Yes	Yes	Yes	86
Week 24	2.62	19.86	0.63	5.04	37.76	8.17	Week 24	04_035	29MAR17	29MAR2017	2.62	19.86	0.63	22.48	5.67	4.62179	2.55	22.39	0.76	6.06	24.94	6.82	3.65313	0.07	-2.53	-0.13	-1.02	-2.46	-1.15	0.968662	04	Entered	59	Female	10OCT16	219	Placebo	>=250 mg/day	No	No	>=250 mg/day	No	Yes	Yes	Yes	Yes	171
Baseline			0.8	4.59	37.33	8.27	Baseline	09_004	04FEB16	04FEB2016	0.5	0.5	0.8	1	5.39	4.51391	0.5	0.5	0.8	4.59	1	5.39	4.51391								09	Entered	48	Male	05FEB16	164	Placebo	>=250 mg/day	Yes	Yes	<250 mg/day	No	Yes	Yes	Yes	Yes	-1
Week 12	6.36	53.91	0.78	7.19	36.32	11.04	Week 12	09_004	29APR16	29APR2016	6.36	53.91	0.78	60.27	7.97	3.28986	0.5	0.5	0.8	4.59	1	5.39	4.51391	5.86	53.41	-0.02	2.6	59.27	2.58	-1.22405	09	Entered	48	Male	05FEB16	164	Placebo	>=250 mg/day	Yes	Yes	<250 mg/day	No	Yes	Yes	Yes	Yes	85
Week 24	2.95	28.71	0.6	6.2	36.5	9.94	Week 24	09_004	29JUL16	29JUL2016	2.95	28.71	0.6	31.66	6.8	3.67203	0.5	0.5	0.8	4.59	1	5.39	4.51391	2.45	28.21	-0.2	1.61	30.66	1.41	-0.841873	09	Entered	48	Male	05FEB16	164	Placebo	>=250 mg/day	Yes	Yes	<250 mg/day	No	Yes	Yes	Yes	Yes	176
Baseline				6.49	36.9	11.14	Baseline	09_005	04FEB16	04FEB2016	0.5	0.5	0.01	1	6.5	3.31239	0.5	0.5	0.01	6.49	1	6.5	3.31239								09	Entered	53	Male	05FEB16	166	MF4637	>=250 mg/day	Yes	Yes	<250 mg/day	No	Yes	Yes	Yes	Yes	-1
Week 12	14.22	61.85	1.58	6.87	34.6	12.68	Week 12	09_005	29APR16	29APR2016	14.22	61.85	1.58	76.07	8.45	2.72871	0.5	0.5	0.01	6.49	1	6.5	3.31239	13.72	61.35	1.57	0.38	75.07	1.95	-0.583681	09	Entered	53	Male	05FEB16	166	MF4637	>=250 mg/day	Yes	Yes	<250 mg/day	No	Yes	Yes	Yes	Yes	85
Week 24	13.61	50.47	1.72	6.47	33.42	12.49	Week 24	09_005	29JUL16	29JUL2016	13.61	50.47	1.72	64.08	8.19	2.67574	0.5	0.5	0.01	6.49	1	6.5	3.31239	13.11	49.97	1.71	-0.02	63.08	1.69	-0.636647	09	Entered	53	Male	05FEB16	166	MF4637	>=250 mg/day	Yes	Yes	<250 mg/day	No	Yes	Yes	Yes	Yes	176
Baseline	1.22	21.5	0.52	6.46	36.99	9.83	Baseline	09_008	04MAR16	04MAR2016	1.22	21.5	0.52	22.72	6.98	3.76297	1.22	21.5	0.52	6.46	22.72	6.98	3.76297								09	Entered	49	Male	04MAR16	165	Placebo	<250 mg/day	No	No	<250 mg/day	No	Yes	Yes	Yes	Yes	1
Week 12	3.62	38.7	0.72	8.66	36.09	12.68	Week 12	09_008	27MAY16	27MAY2016	3.62	38.7	0.72	42.32	9.38	2.84621	1.22	21.5	0.52	6.46	22.72	6.98	3.76297	2.4	17.2	0.2	2.2	19.6	2.4	-0.916756	09	Entered	49	Male	04MAR16	165	Placebo	<250 mg/day	No	No	<250 mg/day	No	Yes	Yes	Yes	Yes	85
Week 24	2.73	33.72	0.51	6.88	37.7	10.59	Week 24	09_008	15AUG16	15AUG2016	2.73	33.72	0.51	36.45	7.39	3.55996	1.22	21.5	0.52	6.46	22.72	6.98	3.76297	1.51	12.22	-0.01	0.42	13.73	0.41	-0.203008	09	Entered	49	Male	04MAR16	165	Placebo	<250 mg/day	No	No	<250 mg/day	No	Yes	Yes	Yes	Yes	165
Retest	1.27	15.48	0.59	8.42	35.5	12.25	Retest	09_008	27MAY16	27MAY2016	1.27	15.48	0.59	16.75	9.01	2.89796	1.22	21.5	0.52	6.46	22.72	6.98	3.76297	0.05	-6.02	0.07	1.96	-5.97	2.03	-0.865011	09	Entered	49	Male	04MAR16	165	Placebo	<250 mg/day	No	No	<250 mg/day	No	Yes	Yes	Yes	Yes	85
Baseline	1.82	26.08	0.37	4.39	36.52	7.55	Baseline	09_015	04OCT16	04OCT2016	1.82	26.08	0.37	27.9	4.76	4.83709	1.82	26.08	0.37	4.39	27.9	4.76	4.83709								09	Entered	72	Male	04OCT16	167	MF4637	>=250 mg/day	Yes	No	<250 mg/day	No	Yes	Yes	Yes	Yes	1
Week 12	2.15	14.89	0.79	5.75	36.26	9.81	Week 12	09_015	22DEC16	22DEC2016	2.15	14.89	0.79	17.04	6.54	3.69623	1.82	26.08	0.37	4.39	27.9	4.76	4.83709	0.33	-11.19	0.42	1.36	-10.86	1.78	-1.14086	09	Entered	72	Male	04OCT16	167	MF4637	>=250 mg/day	Yes	No	<250 mg/day	No	Yes	Yes	Yes	Yes	80
Week 24	1.56	15.32	0.47	5.19	38.01	8.68	Week 24	09_015	23MAR17	23MAR2017	1.56	15.32	0.47	16.88	5.66	4.37903	1.82	26.08	0.37	4.39	27.9	4.76	4.83709	-0.26	-10.76	0.1	0.8	-11.02	0.9	-0.458054	09	Entered	72	Male	04OCT16	167	MF4637	>=250 mg/day	Yes	No	<250 mg/day	No	Yes	Yes	Yes	Yes	171
Baseline		18.07	0.32	4.65	37.39	7.37	Baseline	09_018	14NOV16	14NOV2016	0.5	18.07	0.32	18.57	4.97	5.07327	0.5	18.07	0.32	4.65	18.57	4.97	5.07327								09	Entered	73	Male	14NOV16	105	Placebo	>=250 mg/day	Yes	No	>=250 mg/day	No	Yes	Yes	Yes	Yes	1
Week 12	1.54	24.19	0.29	5.23	37.72	7.87	Week 12	09_018	09FEB17	09FEB2017	1.54	24.19	0.29	25.73	5.52	4.79288	0.5	18.07	0.32	4.65	18.57	4.97	5.07327	1.04	6.12	-0.03	0.58	7.16	0.55	-0.280386	09	Entered	73	Male	14NOV16	105	Placebo	>=250 mg/day	Yes	No	>=250 mg/day	No	Yes	Yes	Yes	Yes	88
Week 24	1.82	26.08	0.26	4.61	39.02	7.23	Week 24	09_018	03MAY17	03MAY2017	1.82	26.08	0.26	27.9	4.87	5.39696	0.5	18.07	0.32	4.65	18.57	4.97	5.07327	1.32	8.01	-0.06	-0.04	9.33	-0.1	0.323687	09	Entered	73	Male	14NOV16	105	Placebo	>=250 mg/day	Yes	No	>=250 mg/day	No	Yes	Yes	Yes	Yes	171
Baseline	2.76	18.48	0.64	3.53	37.02	7.64	Baseline	09_020	14OCT16	14OCT2016	2.76	18.48	0.64	21.24	4.17	4.84555	2.76	18.48	0.64	3.53	21.24	4.17	4.84555								09	Entered	53	Female	14OCT16	169	MF4637	>=250 mg/day	Yes	No	<250 mg/day	No	Yes	Yes	Yes	Yes	1
Week 24	8.98	44.59	1.75	8.54	32.9	14.61	Week 24	09_020	28MAR17	28MAR2017	8.98	44.59	1.75	53.57	10.29	2.25188	2.76	18.48	0.64	3.53	21.24	4.17	4.84555	6.22	26.11	1.11	5.01	32.33	6.12	-2.59367	09	Entered	53	Female	14OCT16	169	MF4637	>=250 mg/day	Yes	No	<250 mg/day	No	Yes	Yes	Yes	Yes	166
Baseline		10.7	0.52	4.07	36.57	7.44	Baseline	09_021	27OCT16	27OCT2016	0.5	10.7	0.52	11.2	4.59	4.91532	0.5	10.7	0.52	4.07	11.2	4.59	4.91532								09	Entered	54	Male	27OCT16	104	MF4637	>=250 mg/day	No	No	<250 mg/day	No	Yes	Yes	Yes	Yes	1
Week 12	9.15	31.32	2.1	7.29	33.79	13.27	Week 12	09_021	24JAN17	24JAN2017	9.15	31.32	2.1	40.47	9.39	2.54635	0.5	10.7	0.52	4.07	11.2	4.59	4.91532	8.65	20.62	1.58	3.22	29.27	4.8	-2.36898	09	Entered	54	Male	27OCT16	104	MF4637	>=250 mg/day	No	No	<250 mg/day	No	Yes	Yes	Yes	Yes	90
Week 24	6.62	39.21	1.1	6.26	37.23	11.05	Week 24	09_021	19APR17	19APR2017	6.62	39.21	1.1	45.83	7.36	3.36923	0.5	10.7	0.52	4.07	11.2	4.59	4.91532	6.12	28.51	0.58	2.19	34.63	2.77	-1.54609	09	Entered	54	Male	27OCT16	104	MF4637	>=250 mg/day	No	No	<250 mg/day	No	Yes	Yes	Yes	Yes	175
Baseline	1.5	16.03	0.39	3.53	39.17	6.61	Baseline	09_024	04OCT16	04OCT2016	1.5	16.03	0.39	17.53	3.92	5.92587	1.5	16.03	0.39	3.53	17.53	3.92	5.92587								09	Entered	47	Male	04OCT16	168	Placebo	>=250 mg/day	Yes	No	<250 mg/day	No	Yes	Yes	Yes	No	1
Week 12		5.41	0.51	4.05	39.91	7.16	Week 12	09_024	22DEC16	22DEC2016	0.5	5.41	0.51	5.91	4.56	5.57402	1.5	16.03	0.39	3.53	17.53	3.92	5.92587	-1	-10.62	0.12	0.52	-11.62	0.64	-0.351848	09	Entered	47	Male	04OCT16	168	Placebo	>=250 mg/day	Yes	No	<250 mg/day	No	Yes	Yes	Yes	No	80
Week 24	1.58	14.28	0.35	3.58	42.24	6.83	Week 24	09_024	10APR17	10APR2017	1.58	14.28	0.35	15.86	3.93	6.18448	1.5	16.03	0.39	3.53	17.53	3.92	5.92587	0.08	-1.75	-0.04	0.05	-1.67	0.01	0.25861	09	Entered	47	Male	04OCT16	168	Placebo	>=250 mg/day	Yes	No	<250 mg/day	No	Yes	Yes	Yes	No	189
Baseline		9.21	0.43	4.82	36.26	7.86	Baseline	09_026	12DEC16	12DEC2016	0.5	9.21	0.43	9.71	5.25	4.61323	0.5	9.21	0.43	4.82	9.71	5.25	4.61323								09	Entered	55	Female	12DEC16	171	Placebo	>=250 mg/day	No	No	<250 mg/day	No	Yes	Yes	Yes	Yes	1
Week 12	2.99	32.42	0.43	5.11	37.15	8.55	Week 12	09_026	06MAR17	06MAR2017	2.99	32.42	0.43	35.41	5.54	4.34503	0.5	9.21	0.43	4.82	9.71	5.25	4.61323	2.49	23.21	0	0.29	25.7	0.29	-0.268202	09	Entered	55	Female	12DEC16	171	Placebo	>=250 mg/day	No	No	<250 mg/day	No	Yes	Yes	Yes	Yes	85
Week 24	1.18	11.84	0.39	4.84	37.63	7.87	Week 24	09_026	07JUN17	07JUN2017	1.18	11.84	0.39	13.02	5.23	4.78145	0.5	9.21	0.43	4.82	9.71	5.25	4.61323	0.68	2.63	-0.04	0.02	3.31	-0.02	0.168217	09	Entered	55	Female	12DEC16	171	Placebo	>=250 mg/day	No	No	<250 mg/day	No	Yes	Yes	Yes	Yes	178
Baseline		15.07	0.35	4.44	38.13	6.67	Baseline	09_027	12DEC16	12DEC2016	0.5	15.07	0.35	15.57	4.79	5.71664	0.5	15.07	0.35	4.44	15.57	4.79	5.71664								09	Early Termination	60	Female	12DEC16	107	Placebo	>=250 mg/day	Yes	No	<250 mg/day	No	Yes	Yes	No	No	1
Baseline		12.97	0.35	3.89	36.39	7.88	Baseline	09_029	12DEC16	12DEC2016	0.5	12.97	0.35	13.47	4.24	4.61802	0.5	12.97	0.35	3.89	13.47	4.24	4.61802								09	Early Termination	63	Female	12DEC16	106	MF4637	>=250 mg/day	Yes	No	<250 mg/day	No	Yes	Yes	No	No	1
Baseline		10.04	0.39	3.46	38.2	6.44	Baseline	09_030	12DEC16	12DEC2016	0.5	10.04	0.39	10.54	3.85	5.93168	0.5	10.04	0.39	3.46	10.54	3.85	5.93168								09	Entered	59	Female	12DEC16	170	MF4637	>=250 mg/day	No	No	<250 mg/day	No	Yes	Yes	Yes	Yes	1
Week 12	9.54	35.56	1.57	5.8	36.09	10.99	Week 12	09_030	06MAR17	06MAR2017	9.54	35.56	1.57	45.1	7.37	3.28389	0.5	10.04	0.39	3.46	10.54	3.85	5.93168	9.04	25.52	1.18	2.34	34.56	3.52	-2.64778	09	Entered	59	Female	12DEC16	170	MF4637	>=250 mg/day	No	No	<250 mg/day	No	Yes	Yes	Yes	Yes	85
Week 24	3.4	18.72	0.83	5.18	37.87	9.62	Week 24	09_030	31MAY17	31MAY2017	3.4	18.72	0.83	22.12	6.01	3.93659	0.5	10.04	0.39	3.46	10.54	3.85	5.93168	2.9	8.68	0.44	1.72	11.58	2.16	-1.99509	09	Entered	59	Female	12DEC16	170	MF4637	>=250 mg/day	No	No	<250 mg/day	No	Yes	Yes	Yes	Yes	171
Baseline	1.39	15.03	0.37	3.23	38.25	6.77	Baseline	10_004	01FEB16	01FEB2016	1.39	15.03	0.37	16.42	3.6	5.64993	1.39	15.03	0.37	3.23	16.42	3.6	5.64993								10	Entered	47	Male	01FEB16	172	MF4637	>=250 mg/day	No	No	>=250 mg/day	No	Yes	Yes	Yes	Yes	1
Week 12	10.76	41.39	2.24	8.5	32.13	14.98	Week 12	10_004	25APR16	25APR2016	10.76	41.39	2.24	52.15	10.74	2.14486	1.39	15.03	0.37	3.23	16.42	3.6	5.64993	9.37	26.36	1.87	5.27	35.73	7.14	-3.50507	10	Entered	47	Male	01FEB16	172	MF4637	>=250 mg/day	No	No	>=250 mg/day	No	Yes	Yes	Yes	Yes	85
Week 24	12.69	49.59	2.3	8.72	31.95	15.39	Week 24	10_004	18JUL16	18JUL2016	12.69	49.59	2.3	62.28	11.02	2.07602	1.39	15.03	0.37	3.23	16.42	3.6	5.64993	11.3	34.56	1.93	5.49	45.86	7.42	-3.5739	10	Entered	47	Male	01FEB16	172	MF4637	>=250 mg/day	No	No	>=250 mg/day	No	Yes	Yes	Yes	Yes	169
Baseline		20.2	0.21	4.51	38.2	7.23	Baseline	10_006	25FEB16	25FEB2016	0.5	20.2	0.21	20.7	4.72	5.28354	0.5	20.2	0.21	4.51	20.7	4.72	5.28354								10	Entered	55	Male	25FEB16	174	Placebo	<250 mg/day	No	No	<250 mg/day	No	Yes	Yes	Yes	Yes	1
Week 12	1.3	27.12	0.24	5.48	39.78	8.41	Week 12	10_006	19MAY16	19MAY2016	1.3	27.12	0.24	28.42	5.72	4.73008	0.5	20.2	0.21	4.51	20.7	4.72	5.28354	0.8	6.92	0.03	0.97	7.72	1	-0.553458	10	Entered	55	Male	25FEB16	174	Placebo	<250 mg/day	No	No	<250 mg/day	No	Yes	Yes	Yes	Yes	85
Week 24	1.86	31.52	0.26	5.09	43.01	8.09	Week 24	10_006	09AUG16	09AUG2016	1.86	31.52	0.26	33.38	5.35	5.31644	0.5	20.2	0.21	4.51	20.7	4.72	5.28354	1.36	11.32	0.05	0.58	12.68	0.63	0.0328992	10	Entered	55	Male	25FEB16	174	Placebo	<250 mg/day	No	No	<250 mg/day	No	Yes	Yes	Yes	Yes	167
Baseline	1.2	27.65	0.29	4.99	35.42	7.53	Baseline	10_007	01MAR16	01MAR2016	1.2	27.65	0.29	28.85	5.28	4.70385	1.2	27.65	0.29	4.99	28.85	5.28	4.70385								10	Entered	54	Female	01MAR16	173	MF4637	<250 mg/day	No	Yes	<250 mg/day	No	Yes	Yes	Yes	Yes	1
Week 12	7.5	37.45	1.47	7.9	34.5	12.74	Week 12	10_007	24MAY16	24MAY2016	7.5	37.45	1.47	44.95	9.37	2.70801	1.2	27.65	0.29	4.99	28.85	5.28	4.70385	6.3	9.8	1.18	2.91	16.1	4.09	-1.99584	10	Entered	54	Female	01MAR16	173	MF4637	<250 mg/day	No	Yes	<250 mg/day	No	Yes	Yes	Yes	Yes	85
Week 24	9.91	44.41	1.71	7.97	32.1	13.49	Week 24	10_007	23AUG16	23AUG2016	9.91	44.41	1.71	54.32	9.68	2.37954	1.2	27.65	0.29	4.99	28.85	5.28	4.70385	8.71	16.76	1.42	2.98	25.47	4.4	-2.32431	10	Entered	54	Female	01MAR16	173	MF4637	<250 mg/day	No	Yes	<250 mg/day	No	Yes	Yes	Yes	Yes	176
Baseline	2.36	19.77	0.49	3.2	36.46	6.91	Baseline	10_009	27JUN16	27JUN2016	2.36	19.77	0.49	22.13	3.69	5.27641	2.36	19.77	0.49	3.2	22.13	3.69	5.27641								10	Entered	64	Female	27JUN16	176	MF4637	<250 mg/day	No	No	<250 mg/day	No	Yes	Yes	Yes	Yes	1
Week 12	6.7	32.22	1.32	6.45	35.21	12.26	Week 12	10_009	19SEP16	19SEP2016	6.7	32.22	1.32	38.92	7.77	2.87194	2.36	19.77	0.49	3.2	22.13	3.69	5.27641	4.34	12.45	0.83	3.25	16.79	4.08	-2.40447	10	Entered	64	Female	27JUN16	176	MF4637	<250 mg/day	No	No	<250 mg/day	No	Yes	Yes	Yes	Yes	85
Week 24	5.15	31.21	0.99	6.36	34.96	11.45	Week 24	10_009	12DEC16	12DEC2016	5.15	31.21	0.99	36.36	7.35	3.05328	2.36	19.77	0.49	3.2	22.13	3.69	5.27641	2.79	11.44	0.5	3.16	14.23	3.66	-2.22314	10	Entered	64	Female	27JUN16	176	MF4637	<250 mg/day	No	No	<250 mg/day	No	Yes	Yes	Yes	Yes	169
Baseline	2.38	25.12	0.38	3.61	35.99	6.7	Baseline	10_010	27SEP16	27SEP2016	2.38	25.12	0.38	27.5	3.99	5.37164	2.38	25.12	0.38	3.61	27.5	3.99	5.37164								10	Entered	34	Male	27SEP16	175	Placebo	>=250 mg/day	No	No	>=250 mg/day	No	Yes	Yes	Yes	Yes	1
Week 12	2.88	24.08	0.42	4.24	39.13	7.84	Week 12	10_010	21DEC16	21DEC2016	2.88	24.08	0.42	26.96	4.66	4.99107	2.38	25.12	0.38	3.61	27.5	3.99	5.37164	0.5	-1.04	0.04	0.63	-0.54	0.67	-0.38057	10	Entered	34	Male	27SEP16	175	Placebo	>=250 mg/day	No	No	>=250 mg/day	No	Yes	Yes	Yes	Yes	86
Week 24	2.86	23.66	0.41	4.11	39.15	7.71	Week 24	10_010	15MAR17	15MAR2017	2.86	23.66	0.41	26.52	4.52	5.07782	2.38	25.12	0.38	3.61	27.5	3.99	5.37164	0.48	-1.46	0.03	0.5	-0.98	0.53	-0.293821	10	Entered	34	Male	27SEP16	175	Placebo	>=250 mg/day	No	No	>=250 mg/day	No	Yes	Yes	Yes	Yes	170
Baseline	2.75	22.9	0.48	3.55	36	7.14	Baseline	10_012	12OCT16	12OCT2016	2.75	22.9	0.48	25.65	4.03	5.04202	2.75	22.9	0.48	3.55	25.65	4.03	5.04202								10	Entered	53	Male	12OCT16	177	Placebo	<250 mg/day	No	Yes	<250 mg/day	No	Yes	Yes	Yes	Yes	1
Week 12	2.41	21	0.56	4.98	37.64	8.79	Week 12	10_012	04JAN17	04JAN2017	2.41	21	0.56	23.41	5.54	4.28214	2.75	22.9	0.48	3.55	25.65	4.03	5.04202	-0.34	-1.9	0.08	1.43	-2.24	1.51	-0.759878	10	Entered	53	Male	12OCT16	177	Placebo	<250 mg/day	No	Yes	<250 mg/day	No	Yes	Yes	Yes	Yes	85
Week 24	3.24	24.31	0.54	4.54	37.9	8.3	Week 24	10_012	28MAR17	28MAR2017	3.24	24.31	0.54	27.55	5.08	4.56627	2.75	22.9	0.48	3.55	25.65	4.03	5.04202	0.49	1.41	0.06	0.99	1.9	1.05	-0.475752	10	Entered	53	Male	12OCT16	177	Placebo	<250 mg/day	No	Yes	<250 mg/day	No	Yes	Yes	Yes	Yes	168
Baseline	21.54	69.82	0.64	2.39	39.84	4.31	Baseline	11_003	15SEP16	15SEP2016	21.54	69.82	0.64	91.36	3.03	9.24362	21.54	69.82	0.64	2.39	91.36	3.03	9.24362								11	Early Termination	52	Male	15SEP16	142	Placebo	<250 mg/day	Yes	Yes	>=250 mg/day	No	Yes	Yes	Yes	Yes	1
Week 12	7.37	79.12	0.37	4.36	39.08	7.28	Week 12	11_003	12DEC16	12DEC2016	7.37	79.12	0.37	86.49	4.73	5.36813	21.54	69.82	0.64	2.39	91.36	3.03	9.24362	-14.17	9.3	-0.27	1.97	-4.87	1.7	-3.87549	11	Early Termination	52	Male	15SEP16	142	Placebo	<250 mg/day	Yes	Yes	>=250 mg/day	No	Yes	Yes	Yes	Yes	89
Baseline	9.53	50.9	0.38	2.73	43.24	4.46	Baseline	11_004	02SEP16	02SEP2016	9.53	50.9	0.38	60.43	3.11	9.69507	9.53	50.9	0.38	2.73	60.43	3.11	9.69507								11	Entered	42	Female	02SEP16	140	MF4637	<250 mg/day	Yes	No	<250 mg/day	No	Yes	Yes	Yes	Yes	1
Week 12	53.44	154.09	3.25	9.87	30.23	17.58	Week 12	11_004	28NOV16	28NOV2016	53.44	154.09	3.25	207.53	13.12	1.71957	9.53	50.9	0.38	2.73	60.43	3.11	9.69507	43.91	103.19	2.87	7.14	147.1	10.01	-7.9755	11	Entered	42	Female	02SEP16	140	MF4637	<250 mg/day	Yes	No	<250 mg/day	No	Yes	Yes	Yes	Yes	88
Week 24	55.07	156.5	3.3	9.59	30.47	17.77	Week 24	11_004	16FEB17	16FEB2017	55.07	156.5	3.3	211.57	12.89	1.71469	9.53	50.9	0.38	2.73	60.43	3.11	9.69507	45.54	105.6	2.92	6.86	151.14	9.78	-7.98038	11	Entered	42	Female	02SEP16	140	MF4637	<250 mg/day	Yes	No	<250 mg/day	No	Yes	Yes	Yes	Yes	168
Baseline	19.51	125.33	0.67	3.93	34.21	7.59	Baseline	11_006	29SEP16	29SEP2016	19.51	125.33	0.67	144.84	4.6	4.50725	19.51	125.33	0.67	3.93	144.84	4.6	4.50725								11	Entered	54	Female	29SEP16	146	Placebo	<250 mg/day	Yes	No	>=250 mg/day	No	Yes	Yes	Yes	Yes	1
Week 12	12.56	86.55	0.77	6.08	35.91	10.21	Week 12	11_006	18JAN17	18JAN2017	12.56	86.55	0.77	99.11	6.85	3.51714	19.51	125.33	0.67	3.93	144.84	4.6	4.50725	-6.95	-38.78	0.1	2.15	-45.73	2.25	-0.990106	11	Entered	54	Female	29SEP16	146	Placebo	<250 mg/day	Yes	No	>=250 mg/day	No	Yes	Yes	Yes	Yes	112
Week 24	9.41	82.61	0.62	5.97	36.44	9.93	Week 24	11_006	16MAR17	16MAR2017	9.41	82.61	0.62	92.02	6.59	3.66969	19.51	125.33	0.67	3.93	144.84	4.6	4.50725	-10.1	-42.72	-0.05	2.04	-52.82	1.99	-0.837559	11	Entered	54	Female	29SEP16	146	Placebo	<250 mg/day	Yes	No	>=250 mg/day	No	Yes	Yes	Yes	Yes	169
Baseline	9.64	61.56	0.39	2.9	40.18	4.44	Baseline	11_008	27SEP16	27SEP2016	9.64	61.56	0.39	71.2	3.29	9.04955	9.64	61.56	0.39	2.9	71.2	3.29	9.04955								11	Entered	42	Male	27SEP16	144	MF4637	<250 mg/day	No	No	>=250 mg/day	No	Yes	Yes	Yes	Yes	1
Week 12	38.17	143.29	2.06	8.28	32.07	13.55	Week 12	11_008	20DEC16	20DEC2016	38.17	143.29	2.06	181.46	10.34	2.36679	9.64	61.56	0.39	2.9	71.2	3.29	9.04955	28.53	81.73	1.67	5.38	110.26	7.05	-6.68276	11	Entered	42	Male	27SEP16	144	MF4637	<250 mg/day	No	No	>=250 mg/day	No	Yes	Yes	Yes	Yes	85
Week 24	34.26	139.07	1.82	7.5	32.24	12.58	Week 24	11_008	14MAR17	14MAR2017	34.26	139.07	1.82	173.33	9.32	2.5628	9.64	61.56	0.39	2.9	71.2	3.29	9.04955	24.62	77.51	1.43	4.6	102.13	6.03	-6.48675	11	Entered	42	Male	27SEP16	144	MF4637	<250 mg/day	No	No	>=250 mg/day	No	Yes	Yes	Yes	Yes	169
Baseline	15.47	125.62	0.77	5.86	34.18	9.4	Baseline	11_009	30SEP16	30SEP2016	15.47	125.62	0.77	141.09	6.63	3.63617	15.47	125.62	0.77	5.86	141.09	6.63	3.63617								11	Entered	50	Female	01OCT16	147	Placebo	<250 mg/day	No	No	<250 mg/day	No	Yes	Yes	Yes	Yes	-1
Week 12	12.45	95.6	0.79	6.28	37.94	10.17	Week 12	11_009	16DEC16	16DEC2016	12.45	95.6	0.79	108.05	7.07	3.73058	15.47	125.62	0.77	5.86	141.09	6.63	3.63617	-3.02	-30.02	0.02	0.42	-33.04	0.44	0.0944099	11	Entered	50	Female	01OCT16	147	Placebo	<250 mg/day	No	No	<250 mg/day	No	Yes	Yes	Yes	Yes	77
Week 24	12.18	78.87	0.83	6.15	38.1	10.14	Week 24	11_009	16MAR17	16MAR2017	12.18	78.87	0.83	91.05	6.98	3.7574	15.47	125.62	0.77	5.86	141.09	6.63	3.63617	-3.29	-46.75	0.06	0.29	-50.04	0.35	0.121226	11	Entered	50	Female	01OCT16	147	Placebo	<250 mg/day	No	No	<250 mg/day	No	Yes	Yes	Yes	Yes	167
Baseline	54.71	99.93	1.63	3.19	35.67	5.99	Baseline	11_010	27SEP16	27SEP2016	54.71	99.93	1.63	154.64	4.82	5.95492	54.71	99.93	1.63	3.19	154.64	4.82	5.95492								11	Entered	52	Female	27SEP16	143	Placebo	<250 mg/day	No	Yes	<250 mg/day	No	Yes	Yes	Yes	Yes	1
Week 12	11.94	93.32	0.56	4.84	35.7	8.18	Week 12	11_010	19DEC16	19DEC2016	11.94	93.32	0.56	105.26	5.4	4.3643	54.71	99.93	1.63	3.19	154.64	4.82	5.95492	-42.77	-6.61	-1.07	1.65	-49.38	0.58	-1.59062	11	Entered	52	Female	27SEP16	143	Placebo	<250 mg/day	No	Yes	<250 mg/day	No	Yes	Yes	Yes	Yes	84
Week 24	11.71	87.85	0.52	4.36	36.47	7.8	Week 24	11_010	13MAR17	13MAR2017	11.71	87.85	0.52	99.56	4.88	4.67564	54.71	99.93	1.63	3.19	154.64	4.82	5.95492	-43	-12.08	-1.11	1.17	-55.08	0.06	-1.27928	11	Entered	52	Female	27SEP16	143	Placebo	<250 mg/day	No	Yes	<250 mg/day	No	Yes	Yes	Yes	Yes	168
Baseline	9.82	52.6	0.46	2.22	37.9	5.6	Baseline	11_011	17OCT16	17OCT2016	9.82	52.6	0.46	62.42	2.68	6.76786	9.82	52.6	0.46	2.22	62.42	2.68	6.76786								11	Entered	41	Female	19OCT16	244	Placebo	<250 mg/day	No	No	>=250 mg/day	No	Yes	Yes	Yes	Yes	-2
Week 12	8.51	42.72	0.42	2.37	41.33	5.43	Week 12	11_011	09JAN17	09JAN2017	8.51	42.72	0.42	51.23	2.79	7.61142	9.82	52.6	0.46	2.22	62.42	2.68	6.76786	-1.31	-9.88	-0.04	0.15	-11.19	0.11	0.843561	11	Entered	41	Female	19OCT16	244	Placebo	<250 mg/day	No	No	>=250 mg/day	No	Yes	Yes	Yes	Yes	83
Week 24	9.25	47.44	0.43	2.95	40.7	6.72	Week 24	11_011	30MAR17	30MAR2017	9.25	47.44	0.43	56.69	3.38	6.05655	9.82	52.6	0.46	2.22	62.42	2.68	6.76786	-0.57	-5.16	-0.03	0.73	-5.73	0.7	-0.71131	11	Entered	41	Female	19OCT16	244	Placebo	<250 mg/day	No	No	>=250 mg/day	No	Yes	Yes	Yes	Yes	163
Baseline	16.34	105.62	0.86	5.14	36.9	8.87	Baseline	11_012	17OCT16	17OCT2016	16.34	105.62	0.86	121.96	6	4.16009	16.34	105.62	0.86	5.14	121.96	6	4.16009								11	Entered	40	Female	18OCT16	145	MF4637	<250 mg/day	No	No	<250 mg/day	No	Yes	Yes	Yes	Yes	-1
Week 12	35.44	115.49	2.07	7.34	36.7	13.03	Week 12	11_012	03JAN17	03JAN2017	35.44	115.49	2.07	150.93	9.41	2.81658	16.34	105.62	0.86	5.14	121.96	6	4.16009	19.1	9.87	1.21	2.2	28.97	3.41	-1.34351	11	Entered	40	Female	18OCT16	145	MF4637	<250 mg/day	No	No	<250 mg/day	No	Yes	Yes	Yes	Yes	78
Week 24	49.17	133.29	1.89	6.64	36.31	12.02	Week 24	11_012	06APR17	06APR2017	49.17	133.29	1.89	182.46	8.53	3.0208	16.34	105.62	0.86	5.14	121.96	6	4.16009	32.83	27.67	1.03	1.5	60.5	2.53	-1.13929	11	Entered	40	Female	18OCT16	145	MF4637	<250 mg/day	No	No	<250 mg/day	No	Yes	Yes	Yes	Yes	171
Baseline	9.37	59.83	0.61	3.55	37.65	7.33	Baseline	11_014	16NOV16	16NOV2016	9.37	59.83	0.61	69.2	4.16	5.13643	9.37	59.83	0.61	3.55	69.2	4.16	5.13643								11	Entered	49	Female	17NOV16	247	Placebo	>=250 mg/day	No	No	>=250 mg/day	No	Yes	Yes	Yes	No	-1
Week 12	9.38	62.85	0.47	3.47	38.54	7.11	Week 12	11_014	21FEB17	21FEB2017	9.38	62.85	0.47	72.23	3.94	5.42053	9.37	59.83	0.61	3.55	69.2	4.16	5.13643	0.01	3.02	-0.14	-0.08	3.03	-0.22	0.284109	11	Entered	49	Female	17NOV16	247	Placebo	>=250 mg/day	No	No	>=250 mg/day	No	Yes	Yes	Yes	No	97
Week 24	9.66	64.15	0.53	3.88	39.25	7.86	Week 24	11_014	04MAY17	04MAY2017	9.66	64.15	0.53	73.81	4.41	4.99364	9.37	59.83	0.61	3.55	69.2	4.16	5.13643	0.29	4.32	-0.08	0.33	4.61	0.25	-0.142787	11	Entered	49	Female	17NOV16	247	Placebo	>=250 mg/day	No	No	>=250 mg/day	No	Yes	Yes	Yes	No	169
Week 12	55.16	140.43	3.29	8.8	30.43	16.54	Week 12	11_015	16NOV16	16NOV2016	55.16	140.43	3.29	195.59	12.09	1.83978															11	Entered	62	Male	10NOV16	245	MF4637	<250 mg/day	No	No	>=250 mg/day	No	Yes	Yes	Yes	Yes	7
Week 24	36.79	138.74	2.28	8.99	30.99	16.03	Week 24	11_015	26APR17	26APR2017	36.79	138.74	2.28	175.53	11.27	1.93325															11	Entered	62	Male	10NOV16	245	MF4637	<250 mg/day	No	No	>=250 mg/day	No	Yes	Yes	Yes	Yes	168
Retest	21.69	113.45	1.23	6.95	34.57	11.75	Retest	11_015	16NOV16	16NOV2016	21.69	113.45	1.23	135.14	8.18	2.94213															11	Entered	62	Male	10NOV16	245	MF4637	<250 mg/day	No	No	>=250 mg/day	No	Yes	Yes	Yes	Yes	7
Baseline	8.12	87.34	0.42	4.01	37.85	6.98	Baseline	11_017	28NOV16	28NOV2016	8.12	87.34	0.42	95.46	4.43	5.42264	8.12	87.34	0.42	4.01	95.46	4.43	5.42264								11	Entered	32	Female	28NOV16	246	MF4637	<250 mg/day	No	No	<250 mg/day	No	Yes	Yes	Yes	Yes	1
Week 12	30.76	117.88	1.86	7.44	36.44	12.87	Week 12	11_017	15FEB17	15FEB2017	30.76	117.88	1.86	148.64	9.3	2.83139	8.12	87.34	0.42	4.01	95.46	4.43	5.42264	22.64	30.54	1.44	3.43	53.18	4.87	-2.59125	11	Entered	32	Female	28NOV16	246	MF4637	<250 mg/day	No	No	<250 mg/day	No	Yes	Yes	Yes	Yes	80
Week 24	33.12	120.3	2.33	8.88	34.63	15.47	Week 24	11_017	12MAY17	12MAY2017	33.12	120.3	2.33	153.42	11.21	2.23853	8.12	87.34	0.42	4.01	95.46	4.43	5.42264	25	32.96	1.91	4.87	57.96	6.78	-3.18411	11	Entered	32	Female	28NOV16	246	MF4637	<250 mg/day	No	No	<250 mg/day	No	Yes	Yes	Yes	Yes	166
Baseline	9.21	72.35	0.49	3.49	36.55	6.93	Baseline	11_018	28NOV16	28NOV2016	9.21	72.35	0.49	81.56	3.98	5.27417	9.21	72.35	0.49	3.49	81.56	3.98	5.27417								11	Entered	45	Female	29NOV16	248	Placebo	<250 mg/day	No	No	>=250 mg/day	No	Yes	Yes	Yes	Yes	-1
Week 12	7.87	74	0.41	3.98	39.45	7.67	Week 12	11_018	20FEB17	20FEB2017	7.87	74	0.41	81.87	4.39	5.14342	9.21	72.35	0.49	3.49	81.56	3.98	5.27417	-1.34	1.65	-0.08	0.49	0.31	0.41	-0.130754	11	Entered	45	Female	29NOV16	248	Placebo	<250 mg/day	No	No	>=250 mg/day	No	Yes	Yes	Yes	Yes	84
Week 24	49.82	82.12	0.42	3.7	37.97	7.31	Week 24	11_018	12MAY17	12MAY2017	49.82	82.12	0.42	131.94	4.12	5.19425	9.21	72.35	0.49	3.49	81.56	3.98	5.27417	40.61	9.77	-0.07	0.21	50.38	0.14	-0.0799158	11	Entered	45	Female	29NOV16	248	Placebo	<250 mg/day	No	No	>=250 mg/day	No	Yes	Yes	Yes	Yes	165
Baseline	10.24	39.35	1.45	4.87	30.69	11.37	Baseline	12_001	14OCT16	14OCT2016	10.24	39.35	1.45	49.59	6.32	2.69921	10.24	39.35	1.45	4.87	49.59	6.32	2.69921								12	Entered	66	Male	14OCT16	257	MF4637	>=250 mg/day	Yes	Yes	>=250 mg/day	No	Yes	Yes	Yes	Yes	1
Week 12	19.29	71.85	2.38	9.57	29.13	16.62	Week 12	12_001	09JAN17	09JAN2017	19.29	71.85	2.38	91.14	11.95	1.75271	10.24	39.35	1.45	4.87	49.59	6.32	2.69921	9.05	32.5	0.93	4.7	41.55	5.63	-0.946501	12	Entered	66	Male	14OCT16	257	MF4637	>=250 mg/day	Yes	Yes	>=250 mg/day	No	Yes	Yes	Yes	Yes	88
Week 24	13.42	50.36	2.48	10.11	28.55	17.29	Week 24	12_001	29MAR17	29MAR2017	13.42	50.36	2.48	63.78	12.59	1.65124	10.24	39.35	1.45	4.87	49.59	6.32	2.69921	3.18	11.01	1.03	5.24	14.19	6.27	-1.04796	12	Entered	66	Male	14OCT16	257	MF4637	>=250 mg/day	Yes	Yes	>=250 mg/day	No	Yes	Yes	Yes	Yes	167
Baseline	2.1	13.23	0.65	3.45	36.84	7.38	Baseline	12_003	11OCT16	11OCT2016	2.1	13.23	0.65	15.33	4.1	4.99187	2.1	13.23	0.65	3.45	15.33	4.1	4.99187								12	Entered	52	Male	11OCT16	138	Placebo	>=250 mg/day	Yes	No	>=250 mg/day	No	Yes	Yes	Yes	Yes	1
Week 12	6.07	29.28	0.73	3.7	38.79	8.22	Week 12	12_003	06JAN17	06JAN2017	6.07	29.28	0.73	35.35	4.43	4.71898	2.1	13.23	0.65	3.45	15.33	4.1	4.99187	3.97	16.05	0.08	0.25	20.02	0.33	-0.272892	12	Entered	52	Male	11OCT16	138	Placebo	>=250 mg/day	Yes	No	>=250 mg/day	No	Yes	Yes	Yes	Yes	88
Week 24	3.91	21.06	0.63	3.46	39.45	7.8	Week 24	12_003	28MAR17	28MAR2017	3.91	21.06	0.63	24.97	4.09	5.05769	2.1	13.23	0.65	3.45	15.33	4.1	4.99187	1.81	7.83	-0.02	0.01	9.64	-0.01	0.0658224	12	Entered	52	Male	11OCT16	138	Placebo	>=250 mg/day	Yes	No	>=250 mg/day	No	Yes	Yes	Yes	Yes	169
Baseline	3.09	33.85	0.74	7.29	33.32	10.95	Baseline	12_004	22SEP16	22SEP2016	3.09	33.85	0.74	36.94	8.03	3.04292	3.09	33.85	0.74	7.29	36.94	8.03	3.04292								12	Entered	70	Male	22SEP16	133	Placebo	>=250 mg/day	Yes	Yes	>=250 mg/day	No	Yes	Yes	Yes	Yes	1
Week 12	3.83	40.97	0.37	5.63	38.29	8.92	Week 12	12_004	15DEC16	15DEC2016	3.83	40.97	0.37	44.8	6	4.2926	3.09	33.85	0.74	7.29	36.94	8.03	3.04292	0.74	7.12	-0.37	-1.66	7.86	-2.03	1.24968	12	Entered	70	Male	22SEP16	133	Placebo	>=250 mg/day	Yes	Yes	>=250 mg/day	No	Yes	Yes	Yes	Yes	85
Week 24	3.01	39.19	0.32	4.76	40.84	8.13	Week 24	12_004	14MAR17	14MAR2017	3.01	39.19	0.32	42.2	5.08	5.02337	3.09	33.85	0.74	7.29	36.94	8.03	3.04292	-0.08	5.34	-0.42	-2.53	5.26	-2.95	1.98045	12	Entered	70	Male	22SEP16	133	Placebo	>=250 mg/day	Yes	Yes	>=250 mg/day	No	Yes	Yes	Yes	Yes	174
Baseline	2.03	23.35	0.4	4.62	34.72	7.49	Baseline	12_006	22SEP16	22SEP2016	2.03	23.35	0.4	25.38	5.02	4.63551	2.03	23.35	0.4	4.62	25.38	5.02	4.63551								12	Entered	76	Female	22SEP16	132	MF4637	<250 mg/day	Yes	Yes	<250 mg/day	No	Yes	Yes	Yes	Yes	1
Week 12	8.18	40.51	1.45	7.29	34.36	12.34	Week 12	12_006	15DEC16	15DEC2016	8.18	40.51	1.45	48.69	8.74	2.78444	2.03	23.35	0.4	4.62	25.38	5.02	4.63551	6.15	17.16	1.05	2.67	23.31	3.72	-1.85107	12	Entered	76	Female	22SEP16	132	MF4637	<250 mg/day	Yes	Yes	<250 mg/day	No	Yes	Yes	Yes	Yes	85
Week 24	10.34	42.63	1.6	6.73	33.38	12.04	Week 24	12_006	13MAR17	13MAR2017	10.34	42.63	1.6	52.97	8.33	2.77243	2.03	23.35	0.4	4.62	25.38	5.02	4.63551	8.31	19.28	1.2	2.11	27.59	3.31	-1.86309	12	Entered	76	Female	22SEP16	132	MF4637	<250 mg/day	Yes	Yes	<250 mg/day	No	Yes	Yes	Yes	Yes	173
Baseline	3.5	26.08	0.47	3.21	37.51	6.07	Baseline	12_007	30SEP16	30SEP2016	3.5	26.08	0.47	29.58	3.68	6.17957	3.5	26.08	0.47	3.21	29.58	3.68	6.17957								12	Entered	64	Female	30SEP16	134	Placebo	>=250 mg/day	No	Yes	>=250 mg/day	No	Yes	Yes	Yes	Yes	1
Week 12	3.68	25.62	0.47	3.61	40.21	6.94	Week 12	12_007	22DEC16	22DEC2016	3.68	25.62	0.47	29.3	4.08	5.79395	3.5	26.08	0.47	3.21	29.58	3.68	6.17957	0.18	-0.46	0	0.4	-0.28	0.4	-0.385624	12	Entered	64	Female	30SEP16	134	Placebo	>=250 mg/day	No	Yes	>=250 mg/day	No	Yes	Yes	Yes	Yes	84
Week 24	4.53	30.86	0.47	3.47	40.86	6.67	Week 24	12_007	14MAR17	14MAR2017	4.53	30.86	0.47	35.39	3.94	6.12594	3.5	26.08	0.47	3.21	29.58	3.68	6.17957	1.03	4.78	0	0.26	5.81	0.26	-0.0536346	12	Entered	64	Female	30SEP16	134	Placebo	>=250 mg/day	No	Yes	>=250 mg/day	No	Yes	Yes	Yes	Yes	166
Baseline	2.59	25.4	0.36	3.09	37.9	6.15	Baseline	12_009	26OCT16	26OCT2016	2.59	25.4	0.36	27.99	3.45	6.1626	2.59	25.4	0.36	3.09	27.99	3.45	6.1626								12	Early Termination	53	Female	26OCT16	260	MF4637	>=250 mg/day	Yes	Yes	>=250 mg/day	No	Yes	Yes	Yes	Yes	1
Early Termination	3.36	29.9	0.49	4.44	40.79	8.26	Early Termination	12_009	27DEC16	27DEC2016	3.36	29.9	0.49	33.26	4.93	4.93826	2.59	25.4	0.36	3.09	27.99	3.45	6.1626	0.77	4.5	0.13	1.35	5.27	1.48	-1.22434	12	Early Termination	53	Female	26OCT16	260	MF4637	>=250 mg/day	Yes	Yes	>=250 mg/day	No	Yes	Yes	Yes	Yes	63
Baseline	2.41	30.44	0.47	5.09	36.71	8.34	Baseline	12_013	30SEP16	30SEP2016	2.41	30.44	0.47	32.85	5.56	4.40168	2.41	30.44	0.47	5.09	32.85	5.56	4.40168								12	Entered	52	Female	30SEP16	137	MF4637	>=250 mg/day	No	Yes	>=250 mg/day	No	Yes	Yes	Yes	Yes	1
Week 12	7.71	58.16	0.87	7.18	37.29	11.76	Week 12	12_013	27DEC16	27DEC2016	7.71	58.16	0.87	65.87	8.05	3.17092	2.41	30.44	0.47	5.09	32.85	5.56	4.40168	5.3	27.72	0.4	2.09	33.02	2.49	-1.23076	12	Entered	52	Female	30SEP16	137	MF4637	>=250 mg/day	No	Yes	>=250 mg/day	No	Yes	Yes	Yes	Yes	89
Week 24	2.72	33.83	0.41	5.77	36.84	8.91	Week 24	12_013	06APR17	06APR2017	2.72	33.83	0.41	36.55	6.18	4.13468	2.41	30.44	0.47	5.09	32.85	5.56	4.40168	0.31	3.39	-0.06	0.68	3.7	0.62	-0.266999	12	Entered	52	Female	30SEP16	137	MF4637	>=250 mg/day	No	Yes	>=250 mg/day	No	Yes	Yes	Yes	Yes	189
Baseline	2.74	31.73	0.52	5.39	36.05	8.38	Baseline	12_014	30SEP16	30SEP2016	2.74	31.73	0.52	34.47	5.91	4.30191	2.74	31.73	0.52	5.39	34.47	5.91	4.30191								12	Entered	66	Female	30SEP16	136	Placebo	>=250 mg/day	Yes	Yes	>=250 mg/day	No	Yes	Yes	Yes	Yes	1
Week 12	5.29	47.58	0.6	6.27	37.76	9.72	Week 12	12_014	21DEC16	21DEC2016	5.29	47.58	0.6	52.87	6.87	3.88477	2.74	31.73	0.52	5.39	34.47	5.91	4.30191	2.55	15.85	0.08	0.88	18.4	0.96	-0.417136	12	Entered	66	Female	30SEP16	136	Placebo	>=250 mg/day	Yes	Yes	>=250 mg/day	No	Yes	Yes	Yes	Yes	83
Week 24	4.46	47.88	0.46	5.31	37.19	8.44	Week 24	12_014	14MAR17	14MAR2017	4.46	47.88	0.46	52.34	5.77	4.4064	2.74	31.73	0.52	5.39	34.47	5.91	4.30191	1.72	16.15	-0.06	-0.08	17.87	-0.14	0.104489	12	Entered	66	Female	30SEP16	136	Placebo	>=250 mg/day	Yes	Yes	>=250 mg/day	No	Yes	Yes	Yes	Yes	166
Baseline	2.16	18.68	0.57	4.48	34.87	7.73	Baseline	12_015	30SEP16	30SEP2016	2.16	18.68	0.57	20.84	5.05	4.511	2.16	18.68	0.57	4.48	20.84	5.05	4.511								12	Early Termination	47	Female	30SEP16	135	MF4637	>=250 mg/day	Yes	Yes	>=250 mg/day	No	Yes	Yes	Yes	Yes	1
Early Termination	7.49	40.67	1.04	6.16	37.23	10.76	Early Termination	12_015	01FEB17	01FEB2017	7.49	40.67	1.04	48.16	7.2	3.46004	2.16	18.68	0.57	4.48	20.84	5.05	4.511	5.33	21.99	0.47	1.68	27.32	2.15	-1.05096	12	Early Termination	47	Female	30SEP16	135	MF4637	>=250 mg/day	Yes	Yes	>=250 mg/day	No	Yes	Yes	Yes	Yes	125
Baseline		12.23	0.32	3.06	37.95	6.49	Baseline	12_016	05OCT16	05OCT2016	0.5	12.23	0.32	12.73	3.38	5.84746	0.5	12.23	0.32	3.06	12.73	3.38	5.84746								12	Entered	52	Female	05OCT16	103	MF4637	<250 mg/day	No	No	<250 mg/day	No	Yes	Yes	Yes	Yes	1
Week 12	2.99	32.77	0.31	3.67	39.85	7.21	Week 12	12_016	27DEC16	27DEC2016	2.99	32.77	0.31	35.76	3.98	5.52705	0.5	12.23	0.32	3.06	12.73	3.38	5.84746	2.49	20.54	-0.01	0.61	23.03	0.6	-0.320412	12	Entered	52	Female	05OCT16	103	MF4637	<250 mg/day	No	No	<250 mg/day	No	Yes	Yes	Yes	Yes	84
Week 24	3.65	27.49	0.3	2.57	38.96	5.67	Week 24	12_016	21MAR17	21MAR2017	3.65	27.49	0.3	31.14	2.87	6.87125	0.5	12.23	0.32	3.06	12.73	3.38	5.84746	3.15	15.26	-0.02	-0.49	18.41	-0.51	1.02379	12	Entered	52	Female	05OCT16	103	MF4637	<250 mg/day	No	No	<250 mg/day	No	Yes	Yes	Yes	Yes	168
Baseline	2.17	22.46	0.48	4.24	35.94	7.21	Baseline	12_017	05OCT16	05OCT2016	2.17	22.46	0.48	24.63	4.72	4.98474	2.17	22.46	0.48	4.24	24.63	4.72	4.98474								12	Entered	57	Female	05OCT16	100	Placebo	>=250 mg/day	Yes	Yes	>=250 mg/day	No	Yes	Yes	Yes	Yes	1
Week 12	4.34	37.79	0.45	4.58	39.66	7.84	Week 12	12_017	28DEC16	28DEC2016	4.34	37.79	0.45	42.13	5.03	5.05867	2.17	22.46	0.48	4.24	24.63	4.72	4.98474	2.17	15.33	-0.03	0.34	17.5	0.31	0.0739301	12	Entered	57	Female	05OCT16	100	Placebo	>=250 mg/day	Yes	Yes	>=250 mg/day	No	Yes	Yes	Yes	Yes	85
Week 24	4.62	39.67	0.46	4.3	37.48	7.3	Week 24	12_017	21MAR17	21MAR2017	4.62	39.67	0.46	44.29	4.76	5.13425	2.17	22.46	0.48	4.24	24.63	4.72	4.98474	2.45	17.21	-0.02	0.06	19.66	0.04	0.149503	12	Entered	57	Female	05OCT16	100	Placebo	>=250 mg/day	Yes	Yes	>=250 mg/day	No	Yes	Yes	Yes	Yes	168
Baseline	3.07	30.51	0.42	3.66	35.57	6.86	Baseline	12_019	05OCT16	05OCT2016	3.07	30.51	0.42	33.58	4.08	5.18513	3.07	30.51	0.42	3.66	33.58	4.08	5.18513								12	Entered	53	Male	05OCT16	102	Placebo	<250 mg/day	Yes	Yes	<250 mg/day	No	Yes	Yes	Yes	Yes	1
Week 12	2.15	18.91	0.43	4.18	39.45	7.83	Week 12	12_019	28DEC16	28DEC2016	2.15	18.91	0.43	21.06	4.61	5.03831	3.07	30.51	0.42	3.66	33.58	4.08	5.18513	-0.92	-11.6	0.01	0.52	-12.52	0.53	-0.146817	12	Entered	53	Male	05OCT16	102	Placebo	<250 mg/day	Yes	Yes	<250 mg/day	No	Yes	Yes	Yes	Yes	85
Week 24	4.85	29.96	0.43	3.43	37.69	6.59	Week 24	12_019	21MAR17	21MAR2017	4.85	29.96	0.43	34.81	3.86	5.71927	3.07	30.51	0.42	3.66	33.58	4.08	5.18513	1.78	-0.55	0.01	-0.23	1.23	-0.22	0.53414	12	Entered	53	Male	05OCT16	102	Placebo	<250 mg/day	Yes	Yes	<250 mg/day	No	Yes	Yes	Yes	Yes	168
Baseline	2.79	27.09	0.76	5.86	35.81	9.84	Baseline	12_020	05OCT16	05OCT2016	2.79	27.09	0.76	29.88	6.62	3.63923	2.79	27.09	0.76	5.86	29.88	6.62	3.63923								12	Entered	60	Female	05OCT16	101	MF4637	>=250 mg/day	Yes	Yes	>=250 mg/day	No	Yes	Yes	Yes	Yes	1
Week 12	4.3	48.56	0.52	6.52	38.37	10.36	Week 12	12_020	28DEC16	28DEC2016	4.3	48.56	0.52	52.86	7.04	3.70367	2.79	27.09	0.76	5.86	29.88	6.62	3.63923	1.51	21.47	-0.24	0.66	22.98	0.42	0.0644403	12	Entered	60	Female	05OCT16	101	MF4637	>=250 mg/day	Yes	Yes	>=250 mg/day	No	Yes	Yes	Yes	Yes	85
Week 24	4.57	42.45	0.49	5.31	37.2	8.97	Week 24	12_020	21MAR17	21MAR2017	4.57	42.45	0.49	47.02	5.8	4.14716	2.79	27.09	0.76	5.86	29.88	6.62	3.63923	1.78	15.36	-0.27	-0.55	17.14	-0.82	0.50793	12	Entered	60	Female	05OCT16	101	MF4637	>=250 mg/day	Yes	Yes	>=250 mg/day	No	Yes	Yes	Yes	Yes	168
Baseline	3.67	27.06	0.78	4.9	36.18	8.7	Baseline	12_021	11OCT16	11OCT2016	3.67	27.06	0.78	30.73	5.68	4.15862	3.67	27.06	0.78	4.9	30.73	5.68	4.15862								12	Entered	54	Male	11OCT16	254	MF4637	>=250 mg/day	Yes	Yes	>=250 mg/day	No	Yes	Yes	Yes	Yes	1
Week 12	4.83	40.3	0.64	5.83	38.58	9.78	Week 12	12_021	03JAN17	03JAN2017	4.83	40.3	0.64	45.13	6.47	3.94479	3.67	27.06	0.78	4.9	30.73	5.68	4.15862	1.16	13.24	-0.14	0.93	14.4	0.79	-0.213835	12	Entered	54	Male	11OCT16	254	MF4637	>=250 mg/day	Yes	Yes	>=250 mg/day	No	Yes	Yes	Yes	Yes	85
Week 24	6.18	55.32	0.58	5.95	36.75	9.57	Week 24	12_021	20APR17	20APR2017	6.18	55.32	0.58	61.5	6.53	3.84013	3.67	27.06	0.78	4.9	30.73	5.68	4.15862	2.51	28.26	-0.2	1.05	30.77	0.85	-0.318495	12	Entered	54	Male	11OCT16	254	MF4637	>=250 mg/day	Yes	Yes	>=250 mg/day	No	Yes	Yes	Yes	Yes	192
Baseline	1.64	20.15	0.44	5.25	35.82	8.57	Baseline	12_022	12OCT16	12OCT2016	1.64	20.15	0.44	21.79	5.69	4.1797	1.64	20.15	0.44	5.25	21.79	5.69	4.1797								12	Entered	43	Male	12OCT16	253	Placebo	<250 mg/day	Yes	No	<250 mg/day	No	Yes	Yes	Yes	Yes	1
Week 12	3.91	48.15	0.46	6.51	37.74	10.14	Week 12	12_022	04JAN17	04JAN2017	3.91	48.15	0.46	52.06	6.97	3.72189	1.64	20.15	0.44	5.25	21.79	5.69	4.1797	2.27	28	0.02	1.26	30.27	1.28	-0.457803	12	Entered	43	Male	12OCT16	253	Placebo	<250 mg/day	Yes	No	<250 mg/day	No	Yes	Yes	Yes	Yes	85
Week 24	5.02	23.5	1.16	5.86	36.21	10.26	Week 24	12_022	28MAR17	28MAR2017	5.02	23.5	1.16	28.52	7.02	3.52924	1.64	20.15	0.44	5.25	21.79	5.69	4.1797	3.38	3.35	0.72	0.61	6.73	1.33	-0.650457	12	Entered	43	Male	12OCT16	253	Placebo	<250 mg/day	Yes	No	<250 mg/day	No	Yes	Yes	Yes	Yes	168
Baseline	2.32	22.86	0.47	4.2	37.47	7.25	Baseline	12_024	11OCT16	11OCT2016	2.32	22.86	0.47	25.18	4.67	5.16828	2.32	22.86	0.47	4.2	25.18	4.67	5.16828								12	Early Termination	41	Female	11OCT16	139	MF4637	>=250 mg/day	Yes	No	>=250 mg/day	No	Yes	Yes	Yes	Yes	1
Early Termination	3.06	32.85	0.42	4.95	41.38	8.4	Early Termination	12_024	05JAN17	05JAN2017	3.06	32.85	0.42	35.91	5.37	4.92619	2.32	22.86	0.47	4.2	25.18	4.67	5.16828	0.74	9.99	-0.05	0.75	10.73	0.7	-0.242085	12	Early Termination	41	Female	11OCT16	139	MF4637	>=250 mg/day	Yes	No	>=250 mg/day	No	Yes	Yes	Yes	Yes	87
Baseline	2.93	36.03	0.5	4.82	35.2	8.24	Baseline	12_025	14OCT16	14OCT2016	2.93	36.03	0.5	38.96	5.32	4.27184	2.93	36.03	0.5	4.82	38.96	5.32	4.27184								12	Entered	73	Male	14OCT16	258	MF4637	>=250 mg/day	Yes	No	>=250 mg/day	No	Yes	Yes	Yes	Yes	1
Week 12	7.03	43.19	1.14	7.23	34	12.02	Week 12	12_025	10JAN17	10JAN2017	7.03	43.19	1.14	50.22	8.37	2.82862	2.93	36.03	0.5	4.82	38.96	5.32	4.27184	4.1	7.16	0.64	2.41	11.26	3.05	-1.44323	12	Entered	73	Male	14OCT16	258	MF4637	>=250 mg/day	Yes	No	>=250 mg/day	No	Yes	Yes	Yes	Yes	89
Week 24	4.51	27.76	1.13	7.3	33.13	12.14	Week 24	12_025	29MAR17	29MAR2017	4.51	27.76	1.13	32.27	8.43	2.729	2.93	36.03	0.5	4.82	38.96	5.32	4.27184	1.58	-8.27	0.63	2.48	-6.69	3.11	-1.54285	12	Entered	73	Male	14OCT16	258	MF4637	>=250 mg/day	Yes	No	>=250 mg/day	No	Yes	Yes	Yes	Yes	167
Baseline	1.33	18.76	0.31	3.98	37.37	6.83	Baseline	12_027	12OCT16	12OCT2016	1.33	18.76	0.31	20.09	4.29	5.47145	1.33	18.76	0.31	3.98	20.09	4.29	5.47145								12	Entered	56	Female	12OCT16	252	Placebo	<250 mg/day	No	Yes	<250 mg/day	No	Yes	Yes	Yes	Yes	1
Week 12	2.19	25.43	0.37	4.88	39.44	8.18	Week 12	12_027	04JAN17	04JAN2017	2.19	25.43	0.37	27.62	5.25	4.82152	1.33	18.76	0.31	3.98	20.09	4.29	5.47145	0.86	6.67	0.06	0.9	7.53	0.96	-0.649934	12	Entered	56	Female	12OCT16	252	Placebo	<250 mg/day	No	Yes	<250 mg/day	No	Yes	Yes	Yes	Yes	85
Week 24	1.08	12.3	0.33	4.65	38.66	7.64	Week 24	12_027	30MAR17	30MAR2017	1.08	12.3	0.33	13.38	4.98	5.06021	1.33	18.76	0.31	3.98	20.09	4.29	5.47145	-0.25	-6.46	0.02	0.67	-6.71	0.69	-0.41124	12	Entered	56	Female	12OCT16	252	Placebo	<250 mg/day	No	Yes	<250 mg/day	No	Yes	Yes	Yes	Yes	170
Baseline	2.37	25.7	0.45	4.09	34.91	7.87	Baseline	12_028	14OCT16	14OCT2016	2.37	25.7	0.45	28.07	4.54	4.43583	2.37	25.7	0.45	4.09	28.07	4.54	4.43583								12	Entered	71	Female	14OCT16	259	Placebo	<250 mg/day	Yes	Yes	<250 mg/day	No	Yes	Yes	Yes	Yes	1
Week 12	3.96	42.59	0.43	4.83	37.53	8.81	Week 12	12_028	09JAN17	09JAN2017	3.96	42.59	0.43	46.55	5.26	4.25993	2.37	25.7	0.45	4.09	28.07	4.54	4.43583	1.59	16.89	-0.02	0.74	18.48	0.72	-0.1759	12	Entered	71	Female	14OCT16	259	Placebo	<250 mg/day	Yes	Yes	<250 mg/day	No	Yes	Yes	Yes	Yes	88
Week 24	3.32	23.55	0.57	5.2	35.66	9.29	Week 24	12_028	30MAR17	30MAR2017	3.32	23.55	0.57	26.87	5.77	3.83854	2.37	25.7	0.45	4.09	28.07	4.54	4.43583	0.95	-2.15	0.12	1.11	-1.2	1.23	-0.597296	12	Entered	71	Female	14OCT16	259	Placebo	<250 mg/day	Yes	Yes	<250 mg/day	No	Yes	Yes	Yes	Yes	168
Baseline	2.59	20.51	0.7	4.69	35.08	8.92	Baseline	12_029	12OCT16	12OCT2016	2.59	20.51	0.7	23.1	5.39	3.93274	2.59	20.51	0.7	4.69	23.1	5.39	3.93274								12	Entered	72	Male	12OCT16	256	Placebo	>=250 mg/day	Yes	Yes	>=250 mg/day	No	Yes	Yes	Yes	Yes	1
Week 12	8.93	47.08	0.91	5.21	36.89	9.76	Week 12	12_029	04JAN17	04JAN2017	8.93	47.08	0.91	56.01	6.12	3.77971	2.59	20.51	0.7	4.69	23.1	5.39	3.93274	6.34	26.57	0.21	0.52	32.91	0.73	-0.153022	12	Entered	72	Male	12OCT16	256	Placebo	>=250 mg/day	Yes	Yes	>=250 mg/day	No	Yes	Yes	Yes	Yes	85
Week 24	4.74	25.25	0.82	5.31	35.8	10.29	Week 24	12_029	28MAR17	28MAR2017	4.74	25.25	0.82	29.99	6.13	3.47911	2.59	20.51	0.7	4.69	23.1	5.39	3.93274	2.15	4.74	0.12	0.62	6.89	0.74	-0.453629	12	Entered	72	Male	12OCT16	256	Placebo	>=250 mg/day	Yes	Yes	>=250 mg/day	No	Yes	Yes	Yes	Yes	168
Baseline	2.01	10.57	0.69	3.13	35.4	7.2	Baseline	12_030	12OCT16	12OCT2016	2.01	10.57	0.69	12.58	3.82	4.91667	2.01	10.57	0.69	3.13	12.58	3.82	4.91667								12	Entered	56	Male	12OCT16	255	MF4637	<250 mg/day	Yes	Yes	<250 mg/day	No	Yes	Yes	Yes	Yes	1
Week 12	4.87	31.23	0.6	4.02	37.61	8.22	Week 12	12_030	06JAN17	06JAN2017	4.87	31.23	0.6	36.1	4.62	4.57543	2.01	10.57	0.69	3.13	12.58	3.82	4.91667	2.86	20.66	-0.09	0.89	23.52	0.8	-0.341241	12	Entered	56	Male	12OCT16	255	MF4637	<250 mg/day	Yes	Yes	<250 mg/day	No	Yes	Yes	Yes	Yes	87
Week 24	3.44	21.26	0.55	3.54	37.69	7.4	Week 24	12_030	29MAR17	29MAR2017	3.44	21.26	0.55	24.7	4.09	5.09324	2.01	10.57	0.69	3.13	12.58	3.82	4.91667	1.43	10.69	-0.14	0.41	12.12	0.27	0.176577	12	Entered	56	Male	12OCT16	255	MF4637	<250 mg/day	Yes	Yes	<250 mg/day	No	Yes	Yes	Yes	Yes	169
Baseline	3.23	40.37	0.41	4.24	36.07	7.16	Baseline	12_032	02NOV16	02NOV2016	3.23	40.37	0.41	43.6	4.65	5.03771	3.23	40.37	0.41	4.24	43.6	4.65	5.03771								12	Entered	67	Male	02NOV16	280	Placebo	>=250 mg/day	Yes	No	>=250 mg/day	No	Yes	Yes	Yes	Yes	1
Week 12	5.89	56.93	0.62	6.47	36.83	9.89	Week 12	12_032	06FEB17	06FEB2017	5.89	56.93	0.62	62.82	7.09	3.72396	3.23	40.37	0.41	4.24	43.6	4.65	5.03771	2.66	16.56	0.21	2.23	19.22	2.44	-1.31375	12	Entered	67	Male	02NOV16	280	Placebo	>=250 mg/day	Yes	No	>=250 mg/day	No	Yes	Yes	Yes	Yes	97
Week 24	4.24	46.83	0.54	6.52	36.37	9.38	Week 24	12_032	18APR17	18APR2017	4.24	46.83	0.54	51.07	7.06	3.8774	3.23	40.37	0.41	4.24	43.6	4.65	5.03771	1.01	6.46	0.13	2.28	7.47	2.41	-1.16031	12	Entered	67	Male	02NOV16	280	Placebo	>=250 mg/day	Yes	No	>=250 mg/day	No	Yes	Yes	Yes	Yes	168
Baseline	4.62	49.49	0.55	5.17	35.27	8.88	Baseline	12_033	02NOV16	02NOV2016	4.62	49.49	0.55	54.11	5.72	3.97185	4.62	49.49	0.55	5.17	54.11	5.72	3.97185								12	Entered	72	Female	02NOV16	282	MF4637	>=250 mg/day	Yes	No	>=250 mg/day	No	Yes	Yes	Yes	Yes	1
Week 12	10.43	56.6	1.33	7.68	33.65	12.77	Week 12	12_033	25JAN17	25JAN2017	10.43	56.6	1.33	67.03	9.01	2.63508	4.62	49.49	0.55	5.17	54.11	5.72	3.97185	5.81	7.11	0.78	2.51	12.92	3.29	-1.33676	12	Entered	72	Female	02NOV16	282	MF4637	>=250 mg/day	Yes	No	>=250 mg/day	No	Yes	Yes	Yes	Yes	85
Week 24	11.49	61.28	1.22	6.68	33.96	11.55	Week 24	12_033	18APR17	18APR2017	11.49	61.28	1.22	72.77	7.9	2.94026	4.62	49.49	0.55	5.17	54.11	5.72	3.97185	6.87	11.79	0.67	1.51	18.66	2.18	-1.03159	12	Entered	72	Female	02NOV16	282	MF4637	>=250 mg/day	Yes	No	>=250 mg/day	No	Yes	Yes	Yes	Yes	168
Baseline	3.04	25.34	0.45	3.51	37.84	6.8	Baseline	12_034	26OCT16	26OCT2016	3.04	25.34	0.45	28.38	3.96	5.56471	3.04	25.34	0.45	3.51	28.38	3.96	5.56471								12	Entered	55	Female	26OCT16	261	Placebo	>=250 mg/day	Yes	No	>=250 mg/day	No	Yes	Yes	Yes	No	1
Week 12	3.64	32.72	0.44	4.11	40.07	7.7	Week 12	12_034	19JAN17	19JAN2017	3.64	32.72	0.44	36.36	4.55	5.2039	3.04	25.34	0.45	3.51	28.38	3.96	5.56471	0.6	7.38	-0.01	0.6	7.98	0.59	-0.36081	12	Entered	55	Female	26OCT16	261	Placebo	>=250 mg/day	Yes	No	>=250 mg/day	No	Yes	Yes	Yes	No	86
Week 24	3.16	22.26	0.46	3.64	39.01	7.12	Week 24	12_034	27APR17	27APR2017	3.16	22.26	0.46	25.42	4.1	5.47893	3.04	25.34	0.45	3.51	28.38	3.96	5.56471	0.12	-3.08	0.01	0.13	-2.96	0.14	-0.0857733	12	Entered	55	Female	26OCT16	261	Placebo	>=250 mg/day	Yes	No	>=250 mg/day	No	Yes	Yes	Yes	No	184
Baseline	2.48	25.3	0.55	4.64	35.24	8.08	Baseline	12_038	26OCT16	26OCT2016	2.48	25.3	0.55	27.78	5.19	4.36139	2.48	25.3	0.55	4.64	27.78	5.19	4.36139								12	Entered	62	Male	26OCT16	263	Placebo	>=250 mg/day	Yes	Yes	>=250 mg/day	No	Yes	Yes	Yes	Yes	1
Week 12	4.16	39.92	0.45	4.92	37.6	8.74	Week 12	12_038	20JAN17	20JAN2017	4.16	39.92	0.45	44.08	5.37	4.30206	2.48	25.3	0.55	4.64	27.78	5.19	4.36139	1.68	14.62	-0.1	0.28	16.3	0.18	-0.0593266	12	Entered	62	Male	26OCT16	263	Placebo	>=250 mg/day	Yes	Yes	>=250 mg/day	No	Yes	Yes	Yes	Yes	87
Week 24	4.68	32.99	0.52	4.26	36.41	8.1	Week 24	12_038	13APR17	13APR2017	4.68	32.99	0.52	37.67	4.78	4.49506	2.48	25.3	0.55	4.64	27.78	5.19	4.36139	2.2	7.69	-0.03	-0.38	9.89	-0.41	0.133676	12	Entered	62	Male	26OCT16	263	Placebo	>=250 mg/day	Yes	Yes	>=250 mg/day	No	Yes	Yes	Yes	Yes	170
Baseline	5.33	28.7	0.74	3.46	34.47	7.17	Baseline	12_039	26OCT16	26OCT2016	5.33	28.7	0.74	34.03	4.2	4.80753	5.33	28.7	0.74	3.46	34.03	4.2	4.80753								12	Entered	57	Male	26OCT16	262	MF4637	<250 mg/day	No	No	<250 mg/day	No	Yes	Yes	Yes	Yes	1
Week 12	16.41	52.44	1.92	6.53	32.89	12.44	Week 12	12_039	17JAN17	17JAN2017	16.41	52.44	1.92	68.85	8.45	2.64389	5.33	28.7	0.74	3.46	34.03	4.2	4.80753	11.08	23.74	1.18	3.07	34.82	4.25	-2.16364	12	Entered	57	Male	26OCT16	262	MF4637	<250 mg/day	No	No	<250 mg/day	No	Yes	Yes	Yes	Yes	84
Week 24	24.89	62.53	2.8	7.12	29.64	14	Week 24	12_039	13APR17	13APR2017	24.89	62.53	2.8	87.42	9.92	2.11714	5.33	28.7	0.74	3.46	34.03	4.2	4.80753	19.56	33.83	2.06	3.66	53.39	5.72	-2.69039	12	Entered	57	Male	26OCT16	262	MF4637	<250 mg/day	No	No	<250 mg/day	No	Yes	Yes	Yes	Yes	170
Baseline	3.63	32.87	0.87	6.76	33.01	10.74	Baseline	12_040	10NOV16	10NOV2016	3.63	32.87	0.87	36.5	7.63	3.07356	3.63	32.87	0.87	6.76	36.5	7.63	3.07356								12	Entered	60	Female	10NOV16	292	MF4637	>=250 mg/day	Yes	Yes	>=250 mg/day	No	Yes	Yes	Yes	Yes	1
Week 12	20.41	61.36	3	9.61	29.97	16.56	Week 12	12_040	02FEB17	02FEB2017	20.41	61.36	3	81.77	12.61	1.80978	3.63	32.87	0.87	6.76	36.5	7.63	3.07356	16.78	28.49	2.13	2.85	45.27	4.98	-1.26377	12	Entered	60	Female	10NOV16	292	MF4637	>=250 mg/day	Yes	Yes	>=250 mg/day	No	Yes	Yes	Yes	Yes	85
Week 24	17.28	51.52	2.99	9.33	28.37	16.51	Week 24	12_040	04MAY17	04MAY2017	17.28	51.52	2.99	68.8	12.32	1.71835	3.63	32.87	0.87	6.76	36.5	7.63	3.07356	13.65	18.65	2.12	2.57	32.3	4.69	-1.3552	12	Entered	60	Female	10NOV16	292	MF4637	>=250 mg/day	Yes	Yes	>=250 mg/day	No	Yes	Yes	Yes	Yes	176
Baseline	2.07	32.55	0.44	5.5	34.9	8.65	Baseline	12_041	10NOV16	10NOV2016	2.07	32.55	0.44	34.62	5.94	4.03468	2.07	32.55	0.44	5.5	34.62	5.94	4.03468								12	Early Termination	54	Female	10NOV16	293	Placebo	>=250 mg/day	Yes	Yes	>=250 mg/day	No	Yes	Yes	Yes	Yes	1
Early Termination	3.92	43.16	0.59	7.38	36.89	11.27	Early Termination	12_041	06DEC16	06DEC2016	3.92	43.16	0.59	47.08	7.97	3.27329	2.07	32.55	0.44	5.5	34.62	5.94	4.03468	1.85	10.61	0.15	1.88	12.46	2.03	-0.76139	12	Early Termination	54	Female	10NOV16	293	Placebo	>=250 mg/day	Yes	Yes	>=250 mg/day	No	Yes	Yes	Yes	Yes	27
Baseline	5.39	28.28	0.57	2.81	35.69	6.96	Baseline	12_043	03NOV16	03NOV2016	5.39	28.28	0.57	33.67	3.38	5.12787	5.39	28.28	0.57	2.81	33.67	3.38	5.12787								12	Entered	77	Male	03NOV16	283	MF4637	>=250 mg/day	Yes	Yes	>=250 mg/day	No	Yes	Yes	Yes	Yes	1
Week 12	4.7	27.94	0.46	2.88	38.2	7.14	Week 12	12_043	26JAN17	26JAN2017	4.7	27.94	0.46	32.64	3.34	5.35014	5.39	28.28	0.57	2.81	33.67	3.38	5.12787	-0.69	-0.34	-0.11	0.07	-1.03	-0.04	0.222266	12	Entered	77	Male	03NOV16	283	MF4637	>=250 mg/day	Yes	Yes	>=250 mg/day	No	Yes	Yes	Yes	Yes	85
Week 24	5.64	27.24	0.52	2.72	37.8	7.08	Week 24	12_043	20APR17	20APR2017	5.64	27.24	0.52	32.88	3.24	5.33898	5.39	28.28	0.57	2.81	33.67	3.38	5.12787	0.25	-1.04	-0.05	-0.09	-0.79	-0.14	0.211109	12	Entered	77	Male	03NOV16	283	MF4637	>=250 mg/day	Yes	Yes	>=250 mg/day	No	Yes	Yes	Yes	Yes	169
Baseline	2.69	27.19	0.34	2.92	37.85	6.34	Baseline	12_044	02NOV16	02NOV2016	2.69	27.19	0.34	29.88	3.26	5.97003	2.69	27.19	0.34	2.92	29.88	3.26	5.97003								12	Entered	66	Male	02NOV16	281	Placebo	>=250 mg/day	Yes	Yes	>=250 mg/day	No	Yes	Yes	Yes	Yes	1
Week 12	4.29	34.81	0.43	3.77	39.78	7.54	Week 12	12_044	27JAN17	27JAN2017	4.29	34.81	0.43	39.1	4.2	5.27586	2.69	27.19	0.34	2.92	29.88	3.26	5.97003	1.6	7.62	0.09	0.85	9.22	0.94	-0.694169	12	Entered	66	Male	02NOV16	281	Placebo	>=250 mg/day	Yes	Yes	>=250 mg/day	No	Yes	Yes	Yes	Yes	87
Week 24	2.81	25.27	0.32	3.45	38.72	6.83	Week 24	12_044	18APR17	18APR2017	2.81	25.27	0.32	28.08	3.77	5.66911	2.69	27.19	0.34	2.92	29.88	3.26	5.97003	0.12	-1.92	-0.02	0.53	-1.8	0.51	-0.300925	12	Entered	66	Male	02NOV16	281	Placebo	>=250 mg/day	Yes	Yes	>=250 mg/day	No	Yes	Yes	Yes	Yes	168
Baseline	2.01	28.43	0.36	4.44	36.7	7.85	Baseline	12_046	03NOV16	03NOV2016	2.01	28.43	0.36	30.44	4.8	4.67516	2.01	28.43	0.36	4.44	30.44	4.8	4.67516								12	Entered	75	Male	03NOV16	284	MF4637	>=250 mg/day	Yes	Yes	>=250 mg/day	No	Yes	Yes	Yes	Yes	1
Week 12	4.59	40.04	0.62	5.88	37.98	9.92	Week 12	12_046	26JAN17	26JAN2017	4.59	40.04	0.62	44.63	6.5	3.82863	2.01	28.43	0.36	4.44	30.44	4.8	4.67516	2.58	11.61	0.26	1.44	14.19	1.7	-0.84653	12	Entered	75	Male	03NOV16	284	MF4637	>=250 mg/day	Yes	Yes	>=250 mg/day	No	Yes	Yes	Yes	Yes	85
Week 24	8.62	49.74	0.92	5.62	36.19	10.22	Week 24	12_046	20APR17	20APR2017	8.62	49.74	0.92	58.36	6.54	3.5411	2.01	28.43	0.36	4.44	30.44	4.8	4.67516	6.61	21.31	0.56	1.18	27.92	1.74	-1.13406	12	Entered	75	Male	03NOV16	284	MF4637	>=250 mg/day	Yes	Yes	>=250 mg/day	No	Yes	Yes	Yes	Yes	169
Baseline			0.7	4.45	37.87	8.28	Baseline	12_047	02NOV16	02NOV2016			0.7		5.15	4.57367			0.7	4.45		5.15	4.57367								12	Screen Failure	46	Male							<250 mg/day	Yes	No	No	No	No
Baseline	3.2	37.34	0.44	4.46	37.15	7.86	Baseline	12_048	03NOV16	03NOV2016	3.2	37.34	0.44	40.54	4.9	4.72646	3.2	37.34	0.44	4.46	40.54	4.9	4.72646								12	Entered	63	Female	03NOV16	285	MF4637	<250 mg/day	Yes	No	<250 mg/day	No	Yes	Yes	Yes	Yes	1
Week 12	4.12	37.24	0.52	5.42	37.86	9.25	Week 12	12_048	26JAN17	26JAN2017	4.12	37.24	0.52	41.36	5.94	4.09297	3.2	37.34	0.44	4.46	40.54	4.9	4.72646	0.92	-0.1	0.08	0.96	0.82	1.04	-0.63349	12	Entered	63	Female	03NOV16	285	MF4637	<250 mg/day	Yes	No	<250 mg/day	No	Yes	Yes	Yes	Yes	85
Week 24	5.09	42.47	0.54	5.12	37.8	8.87	Week 24	12_048	18APR17	18APR2017	5.09	42.47	0.54	47.56	5.66	4.26156	3.2	37.34	0.44	4.46	40.54	4.9	4.72646	1.89	5.13	0.1	0.66	7.02	0.76	-0.464907	12	Entered	63	Female	03NOV16	285	MF4637	<250 mg/day	Yes	No	<250 mg/day	No	Yes	Yes	Yes	Yes	167
Baseline	3.09	28.1	0.38	3.23	36.34	6.42	Baseline	12_054	03NOV16	03NOV2016	3.09	28.1	0.38	31.19	3.61	5.66044	3.09	28.1	0.38	3.23	31.19	3.61	5.66044								12	Entered	60	Female	03NOV16	286	Placebo	>=250 mg/day	Yes	Yes	>=250 mg/day	No	Yes	Yes	Yes	Yes	1
Week 12	5.47	41.95	0.66	5.34	36.29	9.32	Week 12	12_054	27JAN17	27JAN2017	5.47	41.95	0.66	47.42	6	3.89378	3.09	28.1	0.38	3.23	31.19	3.61	5.66044	2.38	13.85	0.28	2.11	16.23	2.39	-1.76666	12	Entered	60	Female	03NOV16	286	Placebo	>=250 mg/day	Yes	Yes	>=250 mg/day	No	Yes	Yes	Yes	Yes	86
Week 24	7.06	43.54	0.79	5.24	35.41	9.27	Week 24	12_054	20APR17	20APR2017	7.06	43.54	0.79	50.6	6.03	3.81985	3.09	28.1	0.38	3.23	31.19	3.61	5.66044	3.97	15.44	0.41	2.01	19.41	2.42	-1.84059	12	Entered	60	Female	03NOV16	286	Placebo	>=250 mg/day	Yes	Yes	>=250 mg/day	No	Yes	Yes	Yes	Yes	169
Baseline	4.75	34.17	0.51	3.49	37.15	6.9	Baseline	12_056	03NOV16	03NOV2016	4.75	34.17	0.51	38.92	4	5.38406	4.75	34.17	0.51	3.49	38.92	4	5.38406								12	Early Termination	61	Male	03NOV16	287	Placebo	<250 mg/day	Yes	Yes	<250 mg/day	No	Yes	Yes	Yes	Yes	1
Early Termination	3.48	26.75	0.51	4.21	38.9	7.82	Early Termination	12_056	11JAN17	11JAN2017	3.48	26.75	0.51	30.23	4.72	4.97442	4.75	34.17	0.51	3.49	38.92	4	5.38406	-1.27	-7.42	0	0.72	-8.69	0.72	-0.409633	12	Early Termination	61	Male	03NOV16	287	Placebo	<250 mg/day	Yes	Yes	<250 mg/day	No	Yes	Yes	Yes	Yes	70
Baseline	1.74	15.86	0.38	2.66	39.37	5.8	Baseline	12_057	10NOV16	10NOV2016	1.74	15.86	0.38	17.6	3.04	6.78793	1.74	15.86	0.38	2.66	17.6	3.04	6.78793								12	Entered	65	Female	10NOV16	294	Placebo	<250 mg/day	Yes	No	<250 mg/day	No	Yes	Yes	Yes	Yes	1
Week 12	4.13	28.63	0.51	3.82	40.71	7.57	Week 12	12_057	06FEB17	06FEB2017	4.13	28.63	0.51	32.76	4.33	5.37781	1.74	15.86	0.38	2.66	17.6	3.04	6.78793	2.39	12.77	0.13	1.16	15.16	1.29	-1.41012	12	Entered	65	Female	10NOV16	294	Placebo	<250 mg/day	Yes	No	<250 mg/day	No	Yes	Yes	Yes	Yes	89
Week 24	2.65	17.5	0.45	3.48	40.28	7.11	Week 24	12_057	27APR17	27APR2017	2.65	17.5	0.45	20.15	3.93	5.66526	1.74	15.86	0.38	2.66	17.6	3.04	6.78793	0.91	1.64	0.07	0.82	2.55	0.89	-1.12267	12	Entered	65	Female	10NOV16	294	Placebo	<250 mg/day	Yes	No	<250 mg/day	No	Yes	Yes	Yes	Yes	169
Baseline	2.79	44.56	0.41	4.92	36.88	7.51	Baseline	12_058	16NOV16	16NOV2016	2.79	44.56	0.41	47.35	5.33	4.91079	2.79	44.56	0.41	4.92	47.35	5.33	4.91079								12	Entered	68	Male	16NOV16	181	Placebo	<250 mg/day	Yes	Yes	<250 mg/day	No	Yes	Yes	Yes	Yes	1
Week 12	2.98	46.71	0.37	6.23	39.49	8.87	Week 12	12_058	10FEB17	10FEB2017	2.98	46.71	0.37	49.69	6.6	4.45209	2.79	44.56	0.41	4.92	47.35	5.33	4.91079	0.19	2.15	-0.04	1.31	2.34	1.27	-0.4587	12	Entered	68	Male	16NOV16	181	Placebo	<250 mg/day	Yes	Yes	<250 mg/day	No	Yes	Yes	Yes	Yes	87
Week 24	3.64	40.92	0.5	6.01	37.69	8.75	Week 24	12_058	03MAY17	03MAY2017	3.64	40.92	0.5	44.56	6.51	4.30743	2.79	44.56	0.41	4.92	47.35	5.33	4.91079	0.85	-3.64	0.09	1.09	-2.79	1.18	-0.603357	12	Entered	68	Male	16NOV16	181	Placebo	<250 mg/day	Yes	Yes	<250 mg/day	No	Yes	Yes	Yes	Yes	169
Baseline	4.19	44.55	0.42	4.06	36.37	7.35	Baseline	12_062	16NOV16	16NOV2016	4.19	44.55	0.42	48.74	4.48	4.9483	4.19	44.55	0.42	4.06	48.74	4.48	4.9483								12	Entered	53	Male	16NOV16	295	MF4637	<250 mg/day	Yes	No	<250 mg/day	No	Yes	Yes	Yes	Yes	1
Week 12	17.36	50.69	2.55	8.06	31.63	14.7	Week 12	12_062	07FEB17	07FEB2017	17.36	50.69	2.55	68.05	10.61	2.1517	4.19	44.55	0.42	4.06	48.74	4.48	4.9483	13.17	6.14	2.13	4	19.31	6.13	-2.7966	12	Entered	53	Male	16NOV16	295	MF4637	<250 mg/day	Yes	No	<250 mg/day	No	Yes	Yes	Yes	Yes	84
Week 24	24.73	76.26	2.73	8.43	30.23	15.36	Week 24	12_062	03MAY17	03MAY2017	24.73	76.26	2.73	100.99	11.16	1.9681	4.19	44.55	0.42	4.06	48.74	4.48	4.9483	20.54	31.71	2.31	4.37	52.25	6.68	-2.9802	12	Entered	53	Male	16NOV16	295	MF4637	<250 mg/day	Yes	No	<250 mg/day	No	Yes	Yes	Yes	Yes	169
Baseline	2.88	24.81	0.42	3.27	36.05	7.04	Baseline	12_065	16NOV16	16NOV2016	2.88	24.81	0.42	27.69	3.69	5.12074	2.88	24.81	0.42	3.27	27.69	3.69	5.12074								12	Entered	76	Female	16NOV16	182	MF4637	<250 mg/day	Yes	Yes	<250 mg/day	No	Yes	Yes	Yes	Yes	1
Week 12	16.4	51.13	2.33	7.2	31.6	13.93	Week 12	12_065	08FEB17	08FEB2017	16.4	51.13	2.33	67.53	9.53	2.26849	2.88	24.81	0.42	3.27	27.69	3.69	5.12074	13.52	26.32	1.91	3.93	39.84	5.84	-2.85225	12	Entered	76	Female	16NOV16	182	MF4637	<250 mg/day	Yes	Yes	<250 mg/day	No	Yes	Yes	Yes	Yes	85
Week 24	6.12	31.73	1.25	6.64	31.68	12.12	Week 24	12_065	10MAY17	10MAY2017	6.12	31.73	1.25	37.85	7.89	2.61386	2.88	24.81	0.42	3.27	27.69	3.69	5.12074	3.24	6.92	0.83	3.37	10.16	4.2	-2.50688	12	Entered	76	Female	16NOV16	182	MF4637	<250 mg/day	Yes	Yes	<250 mg/day	No	Yes	Yes	Yes	Yes	176
Baseline	3.09	33.68	0.4	4.16	37.1	7.51	Baseline	12_067	16NOV16	16NOV2016	3.09	33.68	0.4	36.77	4.56	4.94008	3.09	33.68	0.4	4.16	36.77	4.56	4.94008								12	Entered	72	Female	16NOV16	180	MF4637	>=250 mg/day	Yes	Yes	>=250 mg/day	No	Yes	Yes	Yes	Yes	1
Week 12	39.25	69.61	4.29	7.9	30.42	16.58	Week 12	12_067	07FEB17	07FEB2017	39.25	69.61	4.29	108.86	12.19	1.83474	3.09	33.68	0.4	4.16	36.77	4.56	4.94008	36.16	35.93	3.89	3.74	72.09	7.63	-3.10534	12	Entered	72	Female	16NOV16	180	MF4637	>=250 mg/day	Yes	Yes	>=250 mg/day	No	Yes	Yes	Yes	Yes	84
Week 24	43.43	78.84	5.02	8.98	27.89	18.93	Week 24	12_067	04MAY17	04MAY2017	43.43	78.84	5.02	122.27	14	1.47332	3.09	33.68	0.4	4.16	36.77	4.56	4.94008	40.34	45.16	4.62	4.82	85.5	9.44	-3.46676	12	Entered	72	Female	16NOV16	180	MF4637	>=250 mg/day	Yes	Yes	>=250 mg/day	No	Yes	Yes	Yes	Yes	170
Baseline	1.88	28.38	0.31	3.91	37.03	7.32	Baseline	12_068	21NOV16	21NOV2016	1.88	28.38	0.31	30.26	4.22	5.05874	1.88	28.38	0.31	3.91	30.26	4.22	5.05874								12	Entered	78	Female	21NOV16	183	Placebo	>=250 mg/day	Yes	Yes	>=250 mg/day	No	Yes	Yes	Yes	Yes	1
Week 12	3.62	41.98	0.48	5.78	37.84	9.43	Week 12	12_068	13FEB17	13FEB2017	3.62	41.98	0.48	45.6	6.26	4.01273	1.88	28.38	0.31	3.91	30.26	4.22	5.05874	1.74	13.6	0.17	1.87	15.34	2.04	-1.04602	12	Entered	78	Female	21NOV16	183	Placebo	>=250 mg/day	Yes	Yes	>=250 mg/day	No	Yes	Yes	Yes	Yes	85
Week 24	3.7	40.66	0.51	6.04	37.7	9.91	Week 24	12_068	04MAY17	04MAY2017	3.7	40.66	0.51	44.36	6.55	3.80424	1.88	28.38	0.31	3.91	30.26	4.22	5.05874	1.82	12.28	0.2	2.13	14.1	2.33	-1.25451	12	Entered	78	Female	21NOV16	183	Placebo	>=250 mg/day	Yes	Yes	>=250 mg/day	No	Yes	Yes	Yes	Yes	165
Baseline	1.43	15.96	0.41	3.89	36.87	6.6	Baseline	13_001	27OCT16	27OCT2016	1.43	15.96	0.41	17.39	4.3	5.58636	1.43	15.96	0.41	3.89	17.39	4.3	5.58636								13	Entered	42	Female	28OCT16	162	Placebo	<250 mg/day	No	No	>=250 mg/day	No	Yes	Yes	Yes	Yes	-1
Week 12	1.71	19.89	0.41	5.29	38.63	8.23	Week 12	13_001	19JAN17	19JAN2017	1.71	19.89	0.41	21.6	5.7	4.6938	1.43	15.96	0.41	3.89	17.39	4.3	5.58636	0.28	3.93	0	1.4	4.21	1.4	-0.89256	13	Entered	42	Female	28OCT16	162	Placebo	<250 mg/day	No	No	>=250 mg/day	No	Yes	Yes	Yes	Yes	84
Week 24	1.77	18.7	0.34	4.42	38.96	7.24	Week 24	13_001	19APR17	19APR2017	1.77	18.7	0.34	20.47	4.76	5.38122	1.43	15.96	0.41	3.89	17.39	4.3	5.58636	0.34	2.74	-0.07	0.53	3.08	0.46	-0.205148	13	Entered	42	Female	28OCT16	162	Placebo	<250 mg/day	No	No	>=250 mg/day	No	Yes	Yes	Yes	Yes	174
Baseline	2.28	23.92	0.52	4.63	35.66	7.82	Baseline	13_002	19OCT16	19OCT2016	2.28	23.92	0.52	26.2	5.15	4.5601	2.28	23.92	0.52	4.63	26.2	5.15	4.5601								13	Entered	67	Female	20OCT16	204	MF4637	<250 mg/day	Yes	Yes	<250 mg/day	No	Yes	Yes	Yes	Yes	-1
Week 12	14.43	52.7	2.26	8.62	31.77	14.95	Week 12	13_002	11JAN17	11JAN2017	14.43	52.7	2.26	67.13	10.88	2.12508	2.28	23.92	0.52	4.63	26.2	5.15	4.5601	12.15	28.78	1.74	3.99	40.93	5.73	-2.43502	13	Entered	67	Female	20OCT16	204	MF4637	<250 mg/day	Yes	Yes	<250 mg/day	No	Yes	Yes	Yes	Yes	84
Week 24	18.62	68.73	2.39	8.89	29.77	15.5	Week 24	13_002	05APR17	05APR2017	18.62	68.73	2.39	87.35	11.28	1.92065	2.28	23.92	0.52	4.63	26.2	5.15	4.5601	16.34	44.81	1.87	4.26	61.15	6.13	-2.63946	13	Entered	67	Female	20OCT16	204	MF4637	<250 mg/day	Yes	Yes	<250 mg/day	No	Yes	Yes	Yes	Yes	168
Baseline	3.78	30.3	0.78	5.94	33.25	10.1	Baseline	13_003	19OCT16	19OCT2016	3.78	30.3	0.78	34.08	6.72	3.29208	3.78	30.3	0.78	5.94	34.08	6.72	3.29208								13	Entered	65	Female	20OCT16	205	Placebo	<250 mg/day	Yes	Yes	<250 mg/day	No	Yes	Yes	Yes	Yes	-1
Week 12	2	18.31	0.59	5.69	37.15	9.32	Week 12	13_003	11JAN17	11JAN2017	2	18.31	0.59	20.31	6.28	3.98605	3.78	30.3	0.78	5.94	34.08	6.72	3.29208	-1.78	-11.99	-0.19	-0.25	-13.77	-0.44	0.693972	13	Entered	65	Female	20OCT16	205	Placebo	<250 mg/day	Yes	Yes	<250 mg/day	No	Yes	Yes	Yes	Yes	84
Week 24	4.37	38.6	0.53	4.92	36.32	8.48	Week 24	13_003	05APR17	05APR2017	4.37	38.6	0.53	42.97	5.45	4.28302	3.78	30.3	0.78	5.94	34.08	6.72	3.29208	0.59	8.3	-0.25	-1.02	8.89	-1.27	0.99094	13	Entered	65	Female	20OCT16	205	Placebo	<250 mg/day	Yes	Yes	<250 mg/day	No	Yes	Yes	Yes	Yes	168
Baseline	3.06	22.03	0.61	4.15	35	8.46	Baseline	13_004	19OCT16	19OCT2016	3.06	22.03	0.61	25.09	4.76	4.13712	3.06	22.03	0.61	4.15	25.09	4.76	4.13712								13	Entered	69	Female	20OCT16	206	MF4637	<250 mg/day	No	Yes	<250 mg/day	No	Yes	Yes	Yes	Yes	-1
Week 12	6.97	27	2.21	8.56	31.69	15.79	Week 12	13_004	11JAN17	11JAN2017	6.97	27	2.21	33.97	10.77	2.00697	3.06	22.03	0.61	4.15	25.09	4.76	4.13712	3.91	4.97	1.6	4.41	8.88	6.01	-2.13015	13	Entered	69	Female	20OCT16	206	MF4637	<250 mg/day	No	Yes	<250 mg/day	No	Yes	Yes	Yes	Yes	84
Week 24	16.8	57.67	1.61	8.25	31.43	14.43	Week 24	13_004	05APR17	05APR2017	16.8	57.67	1.61	74.47	9.86	2.1781	3.06	22.03	0.61	4.15	25.09	4.76	4.13712	13.74	35.64	1	4.1	49.38	5.1	-1.95901	13	Entered	69	Female	20OCT16	206	MF4637	<250 mg/day	No	Yes	<250 mg/day	No	Yes	Yes	Yes	Yes	168
Baseline		12.91	0.3	3.5	38.33	6.36	Baseline	13_005	09NOV16	09NOV2016	0.5	12.91	0.3	13.41	3.8	6.02673	0.5	12.91	0.3	3.5	13.41	3.8	6.02673								13	Entered	48	Male	10NOV16	276	MF4637	<250 mg/day	No	No	<250 mg/day	No	Yes	Yes	Yes	Yes	-1
Week 12	8.53	39.24	1.54	7.44	34.57	12.87	Week 12	13_005	01FEB17	01FEB2017	8.53	39.24	1.54	47.77	8.98	2.68609	0.5	12.91	0.3	3.5	13.41	3.8	6.02673	8.03	26.33	1.24	3.94	34.36	5.18	-3.34064	13	Entered	48	Male	10NOV16	276	MF4637	<250 mg/day	No	No	<250 mg/day	No	Yes	Yes	Yes	Yes	84
Week 24	7.76	29.58	2.08	7.82	31.1	13.97	Week 24	13_005	26APR17	26APR2017	7.76	29.58	2.08	37.34	9.9	2.2262	0.5	12.91	0.3	3.5	13.41	3.8	6.02673	7.26	16.67	1.78	4.32	23.93	6.1	-3.80053	13	Entered	48	Male	10NOV16	276	MF4637	<250 mg/day	No	No	<250 mg/day	No	Yes	Yes	Yes	Yes	168
Baseline	5.84	29.86	1.13	5.49	34.98	10.02	Baseline	13_006	28OCT16	28OCT2016	5.84	29.86	1.13	35.7	6.62	3.49102	5.84	29.86	1.13	5.49	35.7	6.62	3.49102								13	Entered	40	Male	28OCT16	160	MF4637	<250 mg/day	No	No	<250 mg/day	No	Yes	Yes	Yes	Yes	1
Week 12	3	16	1.04	6.07	37.95	10.68	Week 12	13_006	20JAN17	20JAN2017	3	16	1.04	19	7.11	3.55337	5.84	29.86	1.13	5.49	35.7	6.62	3.49102	-2.84	-13.86	-0.09	0.58	-16.7	0.49	0.0623528	13	Entered	40	Male	28OCT16	160	MF4637	<250 mg/day	No	No	<250 mg/day	No	Yes	Yes	Yes	Yes	85
Week 24	5.23	30.51	0.8	4.98	37.29	9.06	Week 24	13_006	12APR17	12APR2017	5.23	30.51	0.8	35.74	5.78	4.11589	5.84	29.86	1.13	5.49	35.7	6.62	3.49102	-0.61	0.65	-0.33	-0.51	0.04	-0.84	0.624876	13	Entered	40	Male	28OCT16	160	MF4637	<250 mg/day	No	No	<250 mg/day	No	Yes	Yes	Yes	Yes	167
Baseline	3.24	28.65	0.66	5.5	33.73	9.16	Baseline	13_009	04NOV16	04NOV2016	3.24	28.65	0.66	31.89	6.16	3.68231	3.24	28.65	0.66	5.5	31.89	6.16	3.68231								13	Entered	51	Male	05NOV16	267	Placebo	<250 mg/day	No	Yes	>=250 mg/day	No	Yes	Yes	Yes	Yes	-1
Week 12	4.69	38.95	0.64	5.51	36.1	9.61	Week 12	13_009	24JAN17	24JAN2017	4.69	38.95	0.64	43.64	6.15	3.7565	3.24	28.65	0.66	5.5	31.89	6.16	3.68231	1.45	10.3	-0.02	0.01	11.75	-0.01	0.0741892	13	Entered	51	Male	05NOV16	267	Placebo	<250 mg/day	No	Yes	>=250 mg/day	No	Yes	Yes	Yes	Yes	81
Week 24	2.8	22.95	0.56	5.01	35.78	8.94	Week 24	13_009	19APR17	19APR2017	2.8	22.95	0.56	25.75	5.57	4.00224	3.24	28.65	0.66	5.5	31.89	6.16	3.68231	-0.44	-5.7	-0.1	-0.49	-6.14	-0.59	0.319923	13	Entered	51	Male	05NOV16	267	Placebo	<250 mg/day	No	Yes	>=250 mg/day	No	Yes	Yes	Yes	Yes	166
Baseline	3.98	28.8	0.99	6.35	34.36	10.46	Baseline	13_011	28OCT16	28OCT2016	3.98	28.8	0.99	32.78	7.34	3.28489	3.98	28.8	0.99	6.35	32.78	7.34	3.28489								13	Entered	43	Male	28OCT16	207	Placebo	<250 mg/day	No	No	<250 mg/day	No	Yes	Yes	Yes	Yes	1
Week 12	4.32	29.91	1.04	7.67	36.09	11.93	Week 12	13_011	20JAN17	20JAN2017	4.32	29.91	1.04	34.23	8.71	3.02515	3.98	28.8	0.99	6.35	32.78	7.34	3.28489	0.34	1.11	0.05	1.32	1.45	1.37	-0.259748	13	Entered	43	Male	28OCT16	207	Placebo	<250 mg/day	No	No	<250 mg/day	No	Yes	Yes	Yes	Yes	85
Week 24	7.91	49.67	1	6.65	34.99	10.79	Week 24	13_011	12APR17	12APR2017	7.91	49.67	1	57.58	7.65	3.24282	3.98	28.8	0.99	6.35	32.78	7.34	3.28489	3.93	20.87	0.01	0.3	24.8	0.31	-0.0420774	13	Entered	43	Male	28OCT16	207	Placebo	<250 mg/day	No	No	<250 mg/day	No	Yes	Yes	Yes	Yes	167
Baseline	1.85	21.13	0.5	4.76	36.45	8.2	Baseline	13_013	28OCT16	28OCT2016	1.85	21.13	0.5	22.98	5.26	4.44512	1.85	21.13	0.5	4.76	22.98	5.26	4.44512								13	Entered	46	Male	28OCT16	161	MF4637	<250 mg/day	No	No	>=250 mg/day	No	Yes	Yes	Yes	Yes	1
Week 12	1.3	9.84	0.69	6.06	38.79	9.8	Week 12	13_013	20JAN17	20JAN2017	1.3	9.84	0.69	11.14	6.75	3.95816	1.85	21.13	0.5	4.76	22.98	5.26	4.44512	-0.55	-11.29	0.19	1.3	-11.84	1.49	-0.486959	13	Entered	46	Male	28OCT16	161	MF4637	<250 mg/day	No	No	>=250 mg/day	No	Yes	Yes	Yes	Yes	85
Week 24	2.07	18.6	0.42	4.5	37.51	7.92	Week 24	13_013	05MAY17	05MAY2017	2.07	18.6	0.42	20.67	4.92	4.73611	1.85	21.13	0.5	4.76	22.98	5.26	4.44512	0.22	-2.53	-0.08	-0.26	-2.31	-0.34	0.290989	13	Entered	46	Male	28OCT16	161	MF4637	<250 mg/day	No	No	>=250 mg/day	No	Yes	Yes	Yes	Yes	190
Baseline	1.85	21.53	0.35	3.62	37.42	6.25	Baseline	13_014	03NOV16	03NOV2016	1.85	21.53	0.35	23.38	3.97	5.9872	1.85	21.53	0.35	3.62	23.38	3.97	5.9872								13	Entered	71	Female	03NOV16	266	Placebo	<250 mg/day	No	Yes	<250 mg/day	No	Yes	Yes	Yes	Yes	1
Week 12	2.07	24.28	0.36	4.98	38.57	7.82	Week 12	13_014	25JAN17	25JAN2017	2.07	24.28	0.36	26.35	5.34	4.93223	1.85	21.53	0.35	3.62	23.38	3.97	5.9872	0.22	2.75	0.01	1.36	2.97	1.37	-1.05497	13	Entered	71	Female	03NOV16	266	Placebo	<250 mg/day	No	Yes	<250 mg/day	No	Yes	Yes	Yes	Yes	84
Week 24	8.53	29.72	1.77	6.47	33.84	11	Week 24	13_014	20APR17	20APR2017	8.53	29.72	1.77	38.25	8.24	3.07636	1.85	21.53	0.35	3.62	23.38	3.97	5.9872	6.68	8.19	1.42	2.85	14.87	4.27	-2.91084	13	Entered	71	Female	03NOV16	266	Placebo	<250 mg/day	No	Yes	<250 mg/day	No	Yes	Yes	Yes	Yes	169
Baseline	1.13	16.65	0.36	4.65	36.7	7.24	Baseline	13_015	03NOV16	03NOV2016	1.13	16.65	0.36	17.78	5.01	5.06906	1.13	16.65	0.36	4.65	17.78	5.01	5.06906								13	Entered	75	Male	03NOV16	264	MF4637	<250 mg/day	No	Yes	<250 mg/day	No	Yes	Yes	Yes	Yes	1
Week 12	9.37	42.94	1.63	7.88	32.97	13.32	Week 12	13_015	25JAN17	25JAN2017	9.37	42.94	1.63	52.31	9.51	2.47523	1.13	16.65	0.36	4.65	17.78	5.01	5.06906	8.24	26.29	1.27	3.23	34.53	4.5	-2.59384	13	Entered	75	Male	03NOV16	264	MF4637	<250 mg/day	No	Yes	<250 mg/day	No	Yes	Yes	Yes	Yes	84
Week 24	7.67	37.41	1.74	8.16	29.74	14	Week 24	13_015	20APR17	20APR2017	7.67	37.41	1.74	45.08	9.9	2.12429	1.13	16.65	0.36	4.65	17.78	5.01	5.06906	6.54	20.76	1.38	3.51	27.3	4.89	-2.94478	13	Entered	75	Male	03NOV16	264	MF4637	<250 mg/day	No	Yes	<250 mg/day	No	Yes	Yes	Yes	Yes	169
Baseline	9.81	36.72	2.11	7.25	29.13	13.93	Baseline	13_016	27OCT16	27OCT2016	9.81	36.72	2.11	46.53	9.36	2.09117	9.81	36.72	2.11	7.25	46.53	9.36	2.09117								13	Entered	70	Female	28OCT16	163	Placebo	<250 mg/day	No	Yes	>=250 mg/day	No	Yes	Yes	Yes	Yes	-1
Week 12	4.4	31.25	0.84	6.48	34.26	11.34	Week 12	13_016	19JAN17	19JAN2017	4.4	31.25	0.84	35.65	7.32	3.02116	9.81	36.72	2.11	7.25	46.53	9.36	2.09117	-5.41	-5.47	-1.27	-0.77	-10.88	-2.04	0.929994	13	Entered	70	Female	28OCT16	163	Placebo	<250 mg/day	No	Yes	>=250 mg/day	No	Yes	Yes	Yes	Yes	84
Week 24	7.33	34.72	1.16	5.85	33.69	10.28	Week 24	13_016	13APR17	13APR2017	7.33	34.72	1.16	42.05	7.01	3.27724	9.81	36.72	2.11	7.25	46.53	9.36	2.09117	-2.48	-2	-0.95	-1.4	-4.48	-2.35	1.18607	13	Entered	70	Female	28OCT16	163	Placebo	<250 mg/day	No	Yes	>=250 mg/day	No	Yes	Yes	Yes	Yes	168
Baseline	1.78	19.36	0.47	3.9	39.74	7.36	Baseline	13_017	03NOV16	03NOV2016	1.78	19.36	0.47	21.14	4.37	5.39946	1.78	19.36	0.47	3.9	21.14	4.37	5.39946								13	Entered	52	Female	03NOV16	265	MF4637	<250 mg/day	Yes	Yes	>=250 mg/day	No	Yes	Yes	Yes	Yes	1
Week 12	16.22	47.55	2.83	8.39	34.62	15.5	Week 12	13_017	24JAN17	24JAN2017	16.22	47.55	2.83	63.77	11.22	2.23355	1.78	19.36	0.47	3.9	21.14	4.37	5.39946	14.44	28.19	2.36	4.49	42.63	6.85	-3.16591	13	Entered	52	Female	03NOV16	265	MF4637	<250 mg/day	Yes	Yes	>=250 mg/day	No	Yes	Yes	Yes	Yes	83
Week 24	9.95	28.73	2.89	8.56	32.51	15.59	Week 24	13_017	19APR17	19APR2017	9.95	28.73	2.89	38.68	11.45	2.08531	1.78	19.36	0.47	3.9	21.14	4.37	5.39946	8.17	9.37	2.42	4.66	17.54	7.08	-3.31415	13	Entered	52	Female	03NOV16	265	MF4637	<250 mg/day	Yes	Yes	>=250 mg/day	No	Yes	Yes	Yes	Yes	168
Baseline	1.09	14.89	0.44	4.34	36.69	7.71	Baseline	13_019	22NOV16	22NOV2016	1.09	14.89	0.44	15.98	4.78	4.75875	1.09	14.89	0.44	4.34	15.98	4.78	4.75875								13	Entered	47	Female	23NOV16	278	Placebo	<250 mg/day	No	No	<250 mg/day	No	Yes	Yes	Yes	Yes	-1
Week 12	2.43	24.53	0.41	4.84	38.95	8.46	Week 12	13_019	10FEB17	10FEB2017	2.43	24.53	0.41	26.96	5.25	4.60402	1.09	14.89	0.44	4.34	15.98	4.78	4.75875	1.34	9.64	-0.03	0.5	10.98	0.47	-0.154736	13	Entered	47	Female	23NOV16	278	Placebo	<250 mg/day	No	No	<250 mg/day	No	Yes	Yes	Yes	Yes	80
Week 24	2.2	21.35	0.45	4.51	37.27	8.08	Week 24	13_019	15MAY17	15MAY2017	2.2	21.35	0.45	23.55	4.96	4.61262	1.09	14.89	0.44	4.34	15.98	4.78	4.75875	1.11	6.46	0.01	0.17	7.57	0.18	-0.146131	13	Entered	47	Female	23NOV16	278	Placebo	<250 mg/day	No	No	<250 mg/day	No	Yes	Yes	Yes	Yes	174
Baseline	1.5	17.46	0.35	3.78	37.29	6.63	Baseline	13_020	17NOV16	17NOV2016	1.5	17.46	0.35	18.96	4.13	5.62443	1.5	17.46	0.35	3.78	18.96	4.13	5.62443								13	Entered	55	Male	17NOV16	277	Placebo	<250 mg/day	No	No	<250 mg/day	No	Yes	Yes	Yes	Yes	1
Week 12	1.4	16.48	0.35	4.59	39.71	7.65	Week 12	13_020	10FEB17	10FEB2017	1.4	16.48	0.35	17.88	4.94	5.19085	1.5	17.46	0.35	3.78	18.96	4.13	5.62443	-0.1	-0.98	0	0.81	-1.08	0.81	-0.433585	13	Entered	55	Male	17NOV16	277	Placebo	<250 mg/day	No	No	<250 mg/day	No	Yes	Yes	Yes	Yes	86
Week 24	1.75	20.66	0.4	4.67	38.28	7.67	Week 24	13_020	08MAY17	08MAY2017	1.75	20.66	0.4	22.41	5.07	4.99087	1.5	17.46	0.35	3.78	18.96	4.13	5.62443	0.25	3.2	0.05	0.89	3.45	0.94	-0.633561	13	Entered	55	Male	17NOV16	277	Placebo	<250 mg/day	No	No	<250 mg/day	No	Yes	Yes	Yes	Yes	173
Baseline	2.28	23.16	0.46	4.12	35.47	7.27	Baseline	14_001	25OCT16	25OCT2016	2.28	23.16	0.46	25.44	4.58	4.87895	2.28	23.16	0.46	4.12	25.44	4.58	4.87895								14	Entered	61	Male	25OCT16	185	Placebo	>=250 mg/day	No	Yes	>=250 mg/day	No	Yes	Yes	Yes	Yes	1
Week 12	2.78	25.63	0.52	5.16	37.39	8.51	Week 12	14_001	17JAN17	17JAN2017	2.78	25.63	0.52	28.41	5.68	4.39365	2.28	23.16	0.46	4.12	25.44	4.58	4.87895	0.5	2.47	0.06	1.04	2.97	1.1	-0.4853	14	Entered	61	Male	25OCT16	185	Placebo	>=250 mg/day	No	Yes	>=250 mg/day	No	Yes	Yes	Yes	Yes	85
Week 24	3.32	26.28	0.54	4.61	35.49	7.79	Week 24	14_001	11APR17	11APR2017	3.32	26.28	0.54	29.6	5.15	4.55584	2.28	23.16	0.46	4.12	25.44	4.58	4.87895	1.04	3.12	0.08	0.49	4.16	0.57	-0.323114	14	Entered	61	Male	25OCT16	185	Placebo	>=250 mg/day	No	Yes	>=250 mg/day	No	Yes	Yes	Yes	Yes	169
Baseline	1.29	26.49	0.24	3.72	37.56	6.35	Baseline	14_002	12OCT16	12OCT2016	1.29	26.49	0.24	27.78	3.96	5.91496	1.29	26.49	0.24	3.72	27.78	3.96	5.91496								14	Entered	44	Female	12OCT16	208	MF4637	<250 mg/day	No	Yes	>=250 mg/day	No	Yes	Yes	Yes	Yes	1
Week 12	8.85	36.41	2.02	8.85	33.29	15.14	Week 12	14_002	03JAN17	03JAN2017	8.85	36.41	2.02	45.26	10.87	2.19881	1.29	26.49	0.24	3.72	27.78	3.96	5.91496	7.56	9.92	1.78	5.13	17.48	6.91	-3.71615	14	Entered	44	Female	12OCT16	208	MF4637	<250 mg/day	No	Yes	>=250 mg/day	No	Yes	Yes	Yes	Yes	84
Week 24	18.48	65.03	2.54	8.64	30.2	15.69	Week 24	14_002	24MAR17	24MAR2017	18.48	65.03	2.54	83.51	11.18	1.92479	1.29	26.49	0.24	3.72	27.78	3.96	5.91496	17.19	38.54	2.3	4.92	55.73	7.22	-3.99017	14	Entered	44	Female	12OCT16	208	MF4637	<250 mg/day	No	Yes	>=250 mg/day	No	Yes	Yes	Yes	Yes	164
Baseline	4.1	36.42	0.66	5.52	35.05	8.94	Baseline	14_010	03NOV16	03NOV2016	4.1	36.42	0.66	40.52	6.18	3.92058	4.1	36.42	0.66	5.52	40.52	6.18	3.92058								14	Early Termination	61	Female		184	MF4637	<250 mg/day	No	No	>=250 mg/day	No	No	Yes	No	No
Baseline	1.2	13.35	0.32	2.74	39.36	5.73	Baseline	14_012	14NOV16	14NOV2016	1.2	13.35	0.32	14.55	3.06	6.86911	1.2	13.35	0.32	2.74	14.55	3.06	6.86911								14	Early Termination	34	Male	15NOV16	186	Placebo	<250 mg/day	No	No	>=250 mg/day	No	Yes	Yes	Yes	Yes	-1
Week 12	1.23	10.17	0.39	3.22	41.01	6.59	Week 12	14_012	16FEB17	16FEB2017	1.23	10.17	0.39	11.4	3.61	6.22307	1.2	13.35	0.32	2.74	14.55	3.06	6.86911	0.03	-3.18	0.07	0.48	-3.15	0.55	-0.646045	14	Early Termination	34	Male	15NOV16	186	Placebo	<250 mg/day	No	No	>=250 mg/day	No	Yes	Yes	Yes	Yes	94
Baseline	1.84	19.83	0.53	4.34	36.18	7.67	Baseline	14_014	15NOV16	15NOV2016	1.84	19.83	0.53	21.67	4.87	4.71708	1.84	19.83	0.53	4.34	21.67	4.87	4.71708								14	Entered	33	Female	16NOV16	187	MF4637	<250 mg/day	No	No	>=250 mg/day	No	Yes	Yes	Yes	Yes	-1
Week 12	5.75	23.98	1.86	8.1	34.39	13.85	Week 12	14_014	07FEB17	07FEB2017	5.75	23.98	1.86	29.73	9.96	2.48303	1.84	19.83	0.53	4.34	21.67	4.87	4.71708	3.91	4.15	1.33	3.76	8.06	5.09	-2.23405	14	Entered	33	Female	16NOV16	187	MF4637	<250 mg/day	No	No	>=250 mg/day	No	Yes	Yes	Yes	Yes	84
Week 24	13.92	42.08	2.63	8.04	31.55	14.77	Week 24	14_014	02MAY17	02MAY2017	13.92	42.08	2.63	56	10.67	2.13609	1.84	19.83	0.53	4.34	21.67	4.87	4.71708	12.08	22.25	2.1	3.7	34.33	5.8	-2.58099	14	Entered	33	Female	16NOV16	187	MF4637	<250 mg/day	No	No	>=250 mg/day	No	Yes	Yes	Yes	Yes	168
Baseline	2.01	21.38	0.58	4.94	33.55	8.24	Baseline	14_016	01DEC16	01DEC2016	2.01	21.38	0.58	23.39	5.52	4.0716	2.01	21.38	0.58	4.94	23.39	5.52	4.0716								14	Entered	51	Female	01DEC16	209	Placebo	<250 mg/day	No	No	<250 mg/day	No	Yes	Yes	Yes	Yes	1
Week 12	1.46	10.83	0.66	5.52	36.71	9.39	Week 12	14_016	27FEB17	27FEB2017	1.46	10.83	0.66	12.29	6.18	3.90948	2.01	21.38	0.58	4.94	23.39	5.52	4.0716	-0.55	-10.55	0.08	0.58	-11.1	0.66	-0.162124	14	Entered	51	Female	01DEC16	209	Placebo	<250 mg/day	No	No	<250 mg/day	No	Yes	Yes	Yes	Yes	89
Week 24	4.06	27.85	0.62	4.74	36.38	8.06	Week 24	14_016	19MAY17	19MAY2017	4.06	27.85	0.62	31.91	5.36	4.51365	2.01	21.38	0.58	4.94	23.39	5.52	4.0716	2.05	6.47	0.04	-0.2	8.52	-0.16	0.442046	14	Entered	51	Female	01DEC16	209	Placebo	<250 mg/day	No	No	<250 mg/day	No	Yes	Yes	Yes	Yes	170
Baseline	1.81	18.71	0.36	3.49	38.12	5.89	Baseline	14_018	05DEC16	05DEC2016	1.81	18.71	0.36	20.52	3.85	6.47199	1.81	18.71	0.36	3.49	20.52	3.85	6.47199								14	Entered	25	Female	05DEC16	210	MF4637	>=250 mg/day	No	No	>=250 mg/day	No	Yes	Yes	Yes	Yes	1
Week 12	4.25	16.59	1.45	5.75	38.56	10.15	Week 12	14_018	01MAR17	01MAR2017	4.25	16.59	1.45	20.84	7.2	3.79901	1.81	18.71	0.36	3.49	20.52	3.85	6.47199	2.44	-2.12	1.09	2.26	0.32	3.35	-2.67297	14	Entered	25	Female	05DEC16	210	MF4637	>=250 mg/day	No	No	>=250 mg/day	No	Yes	Yes	Yes	Yes	87
Week 24	3.03	25.35	0.58	4.62	38.34	7.87	Week 24	14_018	23MAY17	23MAY2017	3.03	25.35	0.58	28.38	5.2	4.87166	1.81	18.71	0.36	3.49	20.52	3.85	6.47199	1.22	6.64	0.22	1.13	7.86	1.35	-1.60032	14	Entered	25	Female	05DEC16	210	MF4637	>=250 mg/day	No	No	>=250 mg/day	No	Yes	Yes	Yes	Yes	170
Baseline	1.1	18.75	0.31	4.24	38.45	6.93	Baseline	14_019	02DEC16	02DEC2016	1.1	18.75	0.31	19.85	4.55	5.54834	1.1	18.75	0.31	4.24	19.85	4.55	5.54834								14	Entered	32	Male	03DEC16	211	Placebo	<250 mg/day	No	Yes	<250 mg/day	No	Yes	Yes	Yes	Yes	-1
Week 12		11.36	0.36	4.94	40.45	8.08	Week 12	14_019	28FEB17	28FEB2017	0.5	11.36	0.36	11.86	5.3	5.00619	1.1	18.75	0.31	4.24	19.85	4.55	5.54834	-0.6	-7.39	0.05	0.7	-7.99	0.75	-0.542152	14	Entered	32	Male	03DEC16	211	Placebo	<250 mg/day	No	Yes	<250 mg/day	No	Yes	Yes	Yes	Yes	88
Week 24	2.64	24.29	0.41	3.84	39.5	6.81	Week 24	14_019	18MAY17	18MAY2017	2.64	24.29	0.41	26.93	4.25	5.80029	1.1	18.75	0.31	4.24	19.85	4.55	5.54834	1.54	5.54	0.1	-0.4	7.08	-0.3	0.251953	14	Entered	32	Male	03DEC16	211	Placebo	<250 mg/day	No	Yes	<250 mg/day	No	Yes	Yes	Yes	Yes	167
Baseline	1.17	19.36	0.29	3.71	35.98	6.24	Baseline	15_002	27SEP16	27SEP2016	1.17	19.36	0.29	20.53	4	5.76603	1.17	19.36	0.29	3.71	20.53	4	5.76603								15	Entered	67	Male	27SEP16	149	Placebo	<250 mg/day	No	No	<250 mg/day	No	Yes	Yes	Yes	Yes	1
Week 12	2.12	24.19	0.35	4.65	39.23	7.81	Week 12	15_002	15DEC16	15DEC2016	2.12	24.19	0.35	26.31	5	5.02305	1.17	19.36	0.29	3.71	20.53	4	5.76603	0.95	4.83	0.06	0.94	5.78	1	-0.742978	15	Entered	67	Male	27SEP16	149	Placebo	<250 mg/day	No	No	<250 mg/day	No	Yes	Yes	Yes	Yes	80
Week 24	2.21	22.59	0.37	3.9	38.11	6.82	Week 24	15_002	06MAR17	06MAR2017	2.21	22.59	0.37	24.8	4.27	5.58798	1.17	19.36	0.29	3.71	20.53	4	5.76603	1.04	3.23	0.08	0.19	4.27	0.27	-0.178049	15	Entered	67	Male	27SEP16	149	Placebo	<250 mg/day	No	No	<250 mg/day	No	Yes	Yes	Yes	Yes	161
Baseline	2.51	25.2	0.4	4.02	34.92	7.05	Baseline	15_005	28SEP16	28SEP2016	2.51	25.2	0.4	27.71	4.42	4.95319	2.51	25.2	0.4	4.02	27.71	4.42	4.95319								15	Entered	58	Male	28SEP16	150	Placebo	<250 mg/day	No	No	>=250 mg/day	No	Yes	Yes	Yes	Yes	1
Week 12	2.56	25.16	0.44	5.69	37.75	9.22	Week 12	15_005	21DEC16	21DEC2016	2.56	25.16	0.44	27.72	6.13	4.09436	2.51	25.2	0.4	4.02	27.71	4.42	4.95319	0.05	-0.04	0.04	1.67	0.01	1.71	-0.858831	15	Entered	58	Male	28SEP16	150	Placebo	<250 mg/day	No	No	>=250 mg/day	No	Yes	Yes	Yes	Yes	85
Week 24	2.41	25.79	0.38	4.53	37.4	7.51	Week 24	15_005	14MAR17	14MAR2017	2.41	25.79	0.38	28.2	4.91	4.98003	2.51	25.2	0.4	4.02	27.71	4.42	4.95319	-0.1	0.59	-0.02	0.51	0.49	0.49	0.0268351	15	Entered	58	Male	28SEP16	150	Placebo	<250 mg/day	No	No	>=250 mg/day	No	Yes	Yes	Yes	Yes	168
Baseline	1.36	23.83	0.28	4.09	35.48	6.89	Baseline	15_006	27SEP16	27SEP2016	1.36	23.83	0.28	25.19	4.37	5.14949	1.36	23.83	0.28	4.09	25.19	4.37	5.14949								15	Entered	69	Male	27SEP16	148	MF4637	<250 mg/day	No	No	>=250 mg/day	No	Yes	Yes	Yes	Yes	1
Week 12	2.52	10.19	2.11	8.79	32.56	14.8	Week 12	15_006	20DEC16	20DEC2016	2.52	10.19	2.11	12.71	10.9	2.2	1.36	23.83	0.28	4.09	25.19	4.37	5.14949	1.16	-13.64	1.83	4.7	-12.48	6.53	-2.94949	15	Entered	69	Male	27SEP16	148	MF4637	<250 mg/day	No	No	>=250 mg/day	No	Yes	Yes	Yes	Yes	85
Week 24	2.83	34.12	0.56	6.43	34.44	10.2	Week 24	15_006	14MAR17	14MAR2017	2.83	34.12	0.56	36.95	6.99	3.37647	1.36	23.83	0.28	4.09	25.19	4.37	5.14949	1.47	10.29	0.28	2.34	11.76	2.62	-1.77302	15	Entered	69	Male	27SEP16	148	MF4637	<250 mg/day	No	No	>=250 mg/day	No	Yes	Yes	Yes	Yes	169
Baseline	4.8	32.87	0.96	5.62	33.82	9.6	Baseline	15_007	29SEP16	29SEP2016	4.8	32.87	0.96	37.67	6.58	3.52292	4.8	32.87	0.96	5.62	37.67	6.58	3.52292								15	Entered	74	Male	29SEP16	236	Placebo	<250 mg/day	No	No	>=250 mg/day	No	Yes	Yes	Yes	Yes	1
Week 12	2.83	29.07	0.53	5.55	39.65	8.92	Week 12	15_007	21DEC16	21DEC2016	2.83	29.07	0.53	31.9	6.08	4.44507	4.8	32.87	0.96	5.62	37.67	6.58	3.52292	-1.97	-3.8	-0.43	-0.07	-5.77	-0.5	0.922151	15	Entered	74	Male	29SEP16	236	Placebo	<250 mg/day	No	No	>=250 mg/day	No	Yes	Yes	Yes	Yes	84
Week 24	2.82	24.86	0.51	4.57	38.06	7.7	Week 24	15_007	14MAR17	14MAR2017	2.82	24.86	0.51	27.68	5.08	4.94286	4.8	32.87	0.96	5.62	37.67	6.58	3.52292	-1.98	-8.01	-0.45	-1.05	-9.99	-1.5	1.41994	15	Entered	74	Male	29SEP16	236	Placebo	<250 mg/day	No	No	>=250 mg/day	No	Yes	Yes	Yes	Yes	167
Baseline	2.51	31.71	0.44	5.28	34.53	8.32	Baseline	15_008	28SEP16	28SEP2016	2.51	31.71	0.44	34.22	5.72	4.15024	2.51	31.71	0.44	5.28	34.22	5.72	4.15024								15	Entered	55	Male	28SEP16	151	MF4637	<250 mg/day	No	No	<250 mg/day	No	Yes	Yes	Yes	Yes	1
Week 12	9.43	43.45	1.74	8.46	32.06	14.29	Week 12	15_008	11OCT16	11OCT2016	9.43	43.45	1.74	52.88	10.2	2.24353	2.51	31.71	0.44	5.28	34.22	5.72	4.15024	6.92	11.74	1.3	3.18	18.66	4.48	-1.90671	15	Entered	55	Male	28SEP16	151	MF4637	<250 mg/day	No	No	<250 mg/day	No	Yes	Yes	Yes	Yes	14
Week 24	9.44	42.2	1.82	7.79	30.46	13.58	Week 24	15_008	15MAR17	15MAR2017	9.44	42.2	1.82	51.64	9.61	2.243	2.51	31.71	0.44	5.28	34.22	5.72	4.15024	6.93	10.49	1.38	2.51	17.42	3.89	-1.90724	15	Entered	55	Male	28SEP16	151	MF4637	<250 mg/day	No	No	<250 mg/day	No	Yes	Yes	Yes	Yes	169
Retest	7.45	36.92	1.18	6.48	34.98	10.65	Retest	15_008	11OCT16	11OCT2016	7.45	36.92	1.18	44.37	7.66	3.28451	2.51	31.71	0.44	5.28	34.22	5.72	4.15024	4.94	5.21	0.74	1.2	10.15	1.94	-0.865733	15	Entered	55	Male	28SEP16	151	MF4637	<250 mg/day	No	No	<250 mg/day	No	Yes	Yes	Yes	Yes	14
Baseline	1.86	24.38	0.35	4.08	36.92	7.07	Baseline	15_009	10OCT16	10OCT2016	1.86	24.38	0.35	26.24	4.43	5.22207	1.86	24.38	0.35	4.08	26.24	4.43	5.22207								15	Entered	70	Female	10OCT16	237	MF4637	<250 mg/day	No	No	<250 mg/day	No	Yes	Yes	Yes	Yes	1
Week 12	2.97	24.53	0.64	5.65	37.63	9.69	Week 12	15_009	12JAN17	12JAN2017	2.97	24.53	0.64	27.5	6.29	3.88338	1.86	24.38	0.35	4.08	26.24	4.43	5.22207	1.11	0.15	0.29	1.57	1.26	1.86	-1.33868	15	Entered	70	Female	10OCT16	237	MF4637	<250 mg/day	No	No	<250 mg/day	No	Yes	Yes	Yes	Yes	95
Week 24	2.63	23.57	0.46	4.36	37.72	7.77	Week 24	15_009	28MAR17	28MAR2017	2.63	23.57	0.46	26.2	4.82	4.85457	1.86	24.38	0.35	4.08	26.24	4.43	5.22207	0.77	-0.81	0.11	0.28	-0.04	0.39	-0.367496	15	Entered	70	Female	10OCT16	237	MF4637	<250 mg/day	No	No	<250 mg/day	No	Yes	Yes	Yes	Yes	170
Baseline	2.63	20.68	0.61	4.36	34.97	7.41	Baseline	15_010	11OCT16	11OCT2016	2.63	20.68	0.61	23.31	4.97	4.7193	2.63	20.68	0.61	4.36	23.31	4.97	4.7193								15	Entered	64	Female	11OCT16	238	Placebo	<250 mg/day	No	No	<250 mg/day	No	Yes	Yes	Yes	Yes	1
Week 12	3.07	25.74	0.58	5.53	37.91	9.11	Week 12	15_010	17JAN17	17JAN2017	3.07	25.74	0.58	28.81	6.11	4.16136	2.63	20.68	0.61	4.36	23.31	4.97	4.7193	0.44	5.06	-0.03	1.17	5.5	1.14	-0.557937	15	Entered	64	Female	11OCT16	238	Placebo	<250 mg/day	No	No	<250 mg/day	No	Yes	Yes	Yes	Yes	99
Week 24	3.52	21.57	0.72	4.44	35.12	7.89	Week 24	15_010	31MAR17	31MAR2017	3.52	21.57	0.72	25.09	5.16	4.4512	2.63	20.68	0.61	4.36	23.31	4.97	4.7193	0.89	0.89	0.11	0.08	1.78	0.19	-0.268094	15	Entered	64	Female	11OCT16	238	Placebo	<250 mg/day	No	No	<250 mg/day	No	Yes	Yes	Yes	Yes	172
Baseline	2.2	24.63	0.42	3.9	37.56	7.08	Baseline	15_011	13OCT16	13OCT2016	2.2	24.63	0.42	26.83	4.32	5.30508	2.2	24.63	0.42	3.9	26.83	4.32	5.30508								15	Entered	66	Male	13OCT16	240	Placebo	<250 mg/day	No	No	<250 mg/day	No	Yes	Yes	Yes	Yes	1
Week 12	3.22	25.46	0.51	4.37	40.82	8.12	Week 12	15_011	05JAN17	05JAN2017	3.22	25.46	0.51	28.68	4.88	5.02709	2.2	24.63	0.42	3.9	26.83	4.32	5.30508	1.02	0.83	0.09	0.47	1.85	0.56	-0.277991	15	Entered	66	Male	13OCT16	240	Placebo	<250 mg/day	No	No	<250 mg/day	No	Yes	Yes	Yes	Yes	85
Week 24	2.5	23.27	0.44	3.95	39.12	7.46	Week 24	15_011	28MAR17	28MAR2017	2.5	23.27	0.44	25.77	4.39	5.24397	2.2	24.63	0.42	3.9	26.83	4.32	5.30508	0.3	-1.36	0.02	0.05	-1.06	0.07	-0.0611169	15	Entered	66	Male	13OCT16	240	Placebo	<250 mg/day	No	No	<250 mg/day	No	Yes	Yes	Yes	Yes	167
Baseline			0.45	3.14	37.53	6.32	Baseline	15_012	19OCT16	19OCT2016			0.45		3.59	5.93829			0.45	3.14		3.59	5.93829								15	Entered	54	Female	19OCT16	241	Placebo	<250 mg/day	No	No	<250 mg/day	No	Yes	Yes	Yes	Yes	1
Week 12	2.31	15.2	0.54	3.71	39.27	7.36	Week 12	15_012	10JAN17	10JAN2017	2.31	15.2	0.54	17.51	4.25	5.3356			0.45	3.14		3.59	5.93829			0.09	0.57		0.66	-0.602693	15	Entered	54	Female	19OCT16	241	Placebo	<250 mg/day	No	No	<250 mg/day	No	Yes	Yes	Yes	Yes	84
Week 24	3.36	23.55	0.54	4.06	37.73	7.52	Week 24	15_012	31MAR17	31MAR2017	3.36	23.55	0.54	26.91	4.6	5.01729			0.45	3.14		3.59	5.93829			0.09	0.92		1.01	-0.921004	15	Entered	54	Female	19OCT16	241	Placebo	<250 mg/day	No	No	<250 mg/day	No	Yes	Yes	Yes	Yes	164
Baseline	7.19	33.74	1.3	5.48	33.38	10.06	Baseline	15_013	13OCT16	13OCT2016	7.19	33.74	1.3	40.93	6.78	3.31809	7.19	33.74	1.3	5.48	40.93	6.78	3.31809								15	Entered	58	Female	13OCT16	242	MF4637	<250 mg/day	No	No	>=250 mg/day	No	Yes	Yes	Yes	Yes	1
Week 12	3.65	27.92	0.74	6	35.91	10.24	Week 12	15_013	05JAN17	05JAN2017	3.65	27.92	0.74	31.57	6.74	3.50684	7.19	33.74	1.3	5.48	40.93	6.78	3.31809	-3.54	-5.82	-0.56	0.52	-9.36	-0.04	0.188744	15	Entered	58	Female	13OCT16	242	MF4637	<250 mg/day	No	No	>=250 mg/day	No	Yes	Yes	Yes	Yes	85
Week 24	2.2	30.13	0.37	4.98	37.06	7.97	Week 24	15_013	28MAR17	28MAR2017	2.2	30.13	0.37	32.33	5.35	4.64994	7.19	33.74	1.3	5.48	40.93	6.78	3.31809	-4.99	-3.61	-0.93	-0.5	-8.6	-1.43	1.33185	15	Entered	58	Female	13OCT16	242	MF4637	<250 mg/day	No	No	>=250 mg/day	No	Yes	Yes	Yes	Yes	167
Baseline	2.37	27.1	0.49	4.75	36.94	7.61	Baseline	15_014	13OCT16	13OCT2016	2.37	27.1	0.49	29.47	5.24	4.85414	2.37	27.1	0.49	4.75	29.47	5.24	4.85414								15	Entered	55	Female	13OCT16	239	MF4637	<250 mg/day	No	No	>=250 mg/day	No	Yes	Yes	Yes	Yes	1
Week 12	5.8	36.01	1.08	7	36.38	10.85	Week 12	15_014	09JAN17	09JAN2017	5.8	36.01	1.08	41.81	8.08	3.353	2.37	27.1	0.49	4.75	29.47	5.24	4.85414	3.43	8.91	0.59	2.25	12.34	2.84	-1.50114	15	Entered	55	Female	13OCT16	239	MF4637	<250 mg/day	No	No	>=250 mg/day	No	Yes	Yes	Yes	Yes	89
Week 24	4.62	37.36	0.76	6.11	36.74	9.46	Week 24	15_014	31MAR17	31MAR2017	4.62	37.36	0.76	41.98	6.87	3.88372	2.37	27.1	0.49	4.75	29.47	5.24	4.85414	2.25	10.26	0.27	1.36	12.51	1.63	-0.970418	15	Entered	55	Female	13OCT16	239	MF4637	<250 mg/day	No	No	>=250 mg/day	No	Yes	Yes	Yes	Yes	170
Baseline	2.42	26.31	0.46	4.3	36.2	7.24	Baseline	15_015	09NOV16	09NOV2016	2.42	26.31	0.46	28.73	4.76	5	2.42	26.31	0.46	4.3	28.73	4.76	5								15	Entered	81	Female	09NOV16	268	MF4637	<250 mg/day	No	No	<250 mg/day	No	Yes	Yes	Yes	Yes	1
Week 12	11.55	42.72	1.84	7.33	33.54	12.76	Week 12	15_015	01FEB17	01FEB2017	11.55	42.72	1.84	54.27	9.17	2.62853	2.42	26.31	0.46	4.3	28.73	4.76	5	9.13	16.41	1.38	3.03	25.54	4.41	-2.37147	15	Entered	81	Female	09NOV16	268	MF4637	<250 mg/day	No	No	<250 mg/day	No	Yes	Yes	Yes	Yes	85
Week 24	3.74	23.68	0.79	5.22	36.27	9.21	Week 24	15_015	27APR17	27APR2017	3.74	23.68	0.79	27.42	6.01	3.93811	2.42	26.31	0.46	4.3	28.73	4.76	5	1.32	-2.63	0.33	0.92	-1.31	1.25	-1.06189	15	Entered	81	Female	09NOV16	268	MF4637	<250 mg/day	No	No	<250 mg/day	No	Yes	Yes	Yes	Yes	170
Baseline	7.11	41.67	1.19	6.54	29.32	11.67	Baseline	15_016	09NOV16	09NOV2016	7.11	41.67	1.19	48.78	7.73	2.51243	7.11	41.67	1.19	6.54	48.78	7.73	2.51243								15	Entered	77	Female	09NOV16	243	MF4637	<250 mg/day	Yes	No	>=250 mg/day	No	Yes	Yes	Yes	Yes	1
Week 12	12.73	50.89	2.26	9.84	29.76	16.79	Week 12	15_016	31JAN17	31JAN2017	12.73	50.89	2.26	63.62	12.1	1.77248	7.11	41.67	1.19	6.54	48.78	7.73	2.51243	5.62	9.22	1.07	3.3	14.84	4.37	-0.739941	15	Entered	77	Female	09NOV16	243	MF4637	<250 mg/day	Yes	No	>=250 mg/day	No	Yes	Yes	Yes	Yes	84
Week 24	5.19	32.12	1.26	7.52	31.81	13.13	Week 24	15_016	27APR17	27APR2017	5.19	32.12	1.26	37.31	8.78	2.4227	7.11	41.67	1.19	6.54	48.78	7.73	2.51243	-1.92	-9.55	0.07	0.98	-11.47	1.05	-0.0897289	15	Entered	77	Female	09NOV16	243	MF4637	<250 mg/day	Yes	No	>=250 mg/day	No	Yes	Yes	Yes	Yes	170
Baseline	2.89	30.48	0.54	5.11	35.2	9.01	Baseline	15_017	10NOV16	10NOV2016	2.89	30.48	0.54	33.37	5.65	3.90677	2.89	30.48	0.54	5.11	33.37	5.65	3.90677								15	Entered	62	Male	10NOV16	270	Placebo	<250 mg/day	No	No	<250 mg/day	No	Yes	Yes	Yes	No	1
Week 24	2.92	24.73	0.66	5.32	36.45	9.49	Week 24	15_017	17MAY17	17MAY2017	2.92	24.73	0.66	27.65	5.98	3.84089	2.89	30.48	0.54	5.11	33.37	5.65	3.90677	0.03	-5.75	0.12	0.21	-5.72	0.33	-0.0658851	15	Entered	62	Male	10NOV16	270	Placebo	<250 mg/day	No	No	<250 mg/day	No	Yes	Yes	Yes	No	189
Baseline	3.02	31.69	0.57	4.97	36.39	8.48	Baseline	15_018	15NOV16	15NOV2016	3.02	31.69	0.57	34.71	5.54	4.29127	3.02	31.69	0.57	4.97	34.71	5.54	4.29127								15	Entered	57	Male	15NOV16	269	MF4637	<250 mg/day	No	No	<250 mg/day	No	Yes	Yes	Yes	Yes	1
Week 12	14.59	40.17	2.82	8.07	32.3	15.2	Week 12	15_018	07FEB17	07FEB2017	14.59	40.17	2.82	54.76	10.89	2.125	3.02	31.69	0.57	4.97	34.71	5.54	4.29127	11.57	8.48	2.25	3.1	20.05	5.35	-2.16627	15	Entered	57	Male	15NOV16	269	MF4637	<250 mg/day	No	No	<250 mg/day	No	Yes	Yes	Yes	Yes	85
Week 24	13.25	40.99	2.58	8.04	32.61	14.86	Week 24	15_018	28APR17	28APR2017	13.25	40.99	2.58	54.24	10.62	2.19448	3.02	31.69	0.57	4.97	34.71	5.54	4.29127	10.23	9.3	2.01	3.07	19.53	5.08	-2.09679	15	Entered	57	Male	15NOV16	269	MF4637	<250 mg/day	No	No	<250 mg/day	No	Yes	Yes	Yes	Yes	165
Baseline	3.47	29.05	0.59	4.77	35.8	7.72	Baseline	15_019	17NOV16	17NOV2016	3.47	29.05	0.59	32.52	5.36	4.63731	3.47	29.05	0.59	4.77	32.52	5.36	4.63731								15	Entered	38	Female	17NOV16	271	Placebo	<250 mg/day	No	No	>=250 mg/day	No	Yes	Yes	Yes	Yes	1
Week 12	2.49	26.21	0.53	5.87	38.29	9.03	Week 12	15_019	08FEB17	08FEB2017	2.49	26.21	0.53	28.7	6.4	4.24031	3.47	29.05	0.59	4.77	32.52	5.36	4.63731	-0.98	-2.84	-0.06	1.1	-3.82	1.04	-0.396996	15	Entered	38	Female	17NOV16	271	Placebo	<250 mg/day	No	No	>=250 mg/day	No	Yes	Yes	Yes	Yes	84
Week 24	3.52	26.69	0.83	5.92	35.92	9.52	Week 24	15_019	28APR17	28APR2017	3.52	26.69	0.83	30.21	6.75	3.77311	3.47	29.05	0.59	4.77	32.52	5.36	4.63731	0.05	-2.36	0.24	1.15	-2.31	1.39	-0.864196	15	Entered	38	Female	17NOV16	271	Placebo	<250 mg/day	No	No	>=250 mg/day	No	Yes	Yes	Yes	Yes	163
Baseline	2.5	21.38	0.46	3.44	35.95	7.12	Baseline	15_020	30NOV16	30NOV2016	2.5	21.38	0.46	23.88	3.9	5.04916	2.5	21.38	0.46	3.44	23.88	3.9	5.04916								15	Early Termination	65	Female	30NOV16	272	MF4637	<250 mg/day	No	No	>=250 mg/day	No	Yes	Yes	Yes	Yes	1
Week 12	2.73	19.71	0.54	4.27	38.68	8.59	Week 12	15_020	22FEB17	22FEB2017	2.73	19.71	0.54	22.44	4.81	4.50291	2.5	21.38	0.46	3.44	23.88	3.9	5.04916	0.23	-1.67	0.08	0.83	-1.44	0.91	-0.546247	15	Early Termination	65	Female	30NOV16	272	MF4637	<250 mg/day	No	No	>=250 mg/day	No	Yes	Yes	Yes	Yes	85
Baseline	2.27	18.18	0.43	2.81	37.13	5.97	Baseline	15_021	02DEC16	02DEC2016	2.27	18.18	0.43	20.45	3.24	6.21943	2.27	18.18	0.43	2.81	20.45	3.24	6.21943								15	Entered	41	Male	02DEC16	273	Placebo	<250 mg/day	No	No	>=250 mg/day	No	Yes	Yes	Yes	Yes	1
Week 12	3.26	26.08	0.51	4.74	38.51	8.5	Week 12	15_021	23FEB17	23FEB2017	3.26	26.08	0.51	29.34	5.25	4.53059	2.27	18.18	0.43	2.81	20.45	3.24	6.21943	0.99	7.9	0.08	1.93	8.89	2.01	-1.68884	15	Entered	41	Male	02DEC16	273	Placebo	<250 mg/day	No	No	>=250 mg/day	No	Yes	Yes	Yes	Yes	84
Week 24	2.26	17.49	0.47	3.55	38.56	6.87	Week 24	15_021	18MAY17	18MAY2017	2.26	17.49	0.47	19.75	4.02	5.61281	2.27	18.18	0.43	2.81	20.45	3.24	6.21943	-0.01	-0.69	0.04	0.74	-0.7	0.78	-0.606621	15	Entered	41	Male	02DEC16	273	Placebo	<250 mg/day	No	No	>=250 mg/day	No	Yes	Yes	Yes	Yes	168
Baseline	2.53	28.48	0.48	4.93	36.14	8.04	Baseline	15_022	09DEC16	09DEC2016	2.53	28.48	0.48	31.01	5.41	4.49502	2.53	28.48	0.48	4.93	31.01	5.41	4.49502								15	Entered	48	Male	09DEC16	274	Placebo	<250 mg/day	No	No	<250 mg/day	No	Yes	Yes	Yes	Yes	1
Week 12	2.38	28.44	0.43	6.26	39.83	9.58	Week 12	15_022	28FEB17	28FEB2017	2.38	28.44	0.43	30.82	6.69	4.15762	2.53	28.48	0.48	4.93	31.01	5.41	4.49502	-0.15	-0.04	-0.05	1.33	-0.19	1.28	-0.337405	15	Entered	48	Male	09DEC16	274	Placebo	<250 mg/day	No	No	<250 mg/day	No	Yes	Yes	Yes	Yes	82
Week 24	2.44	26.5	0.57	5.66	38.62	9.02	Week 24	15_022	25MAY17	25MAY2017	2.44	26.5	0.57	28.94	6.23	4.2816	2.53	28.48	0.48	4.93	31.01	5.41	4.49502	-0.09	-1.98	0.09	0.73	-2.07	0.82	-0.213428	15	Entered	48	Male	09DEC16	274	Placebo	<250 mg/day	No	No	<250 mg/day	No	Yes	Yes	Yes	Yes	168
Baseline	5.01	38.91	0.96	6.46	33.47	10.56	Baseline	15_023	06DEC16	06DEC2016	5.01	38.91	0.96	43.92	7.42	3.16951	5.01	38.91	0.96	6.46	43.92	7.42	3.16951								15	Entered	58	Female	06DEC16	275	MF4637	<250 mg/day	No	No	>=250 mg/day	No	Yes	Yes	Yes	Yes	1
Week 12	9.07	41.47	1.8	8.63	33.94	14.55	Week 12	15_023	01MAR17	01MAR2017	9.07	41.47	1.8	50.54	10.43	2.33265	5.01	38.91	0.96	6.46	43.92	7.42	3.16951	4.06	2.56	0.84	2.17	6.62	3.01	-0.836862	15	Entered	58	Female	06DEC16	275	MF4637	<250 mg/day	No	No	>=250 mg/day	No	Yes	Yes	Yes	Yes	86
Week 24	5.53	33.51	1.23	7.5	34.79	12.45	Week 24	15_023	25MAY17	25MAY2017	5.53	33.51	1.23	39.04	8.73	2.79438	5.01	38.91	0.96	6.46	43.92	7.42	3.16951	0.52	-5.4	0.27	1.04	-4.88	1.31	-0.37513	15	Entered	58	Female	06DEC16	275	MF4637	<250 mg/day	No	No	>=250 mg/day	No	Yes	Yes	Yes	Yes	171
Baseline	2.36	26.23	0.43	4.17	36.69	6.99	Baseline	15_024	16NOV16	16NOV2016	2.36	26.23	0.43	28.59	4.6	5.24893	2.36	26.23	0.43	4.17	28.59	4.6	5.24893								15	Screen Failure	74	Female							<250 mg/day	Yes	No	No	No	No
Baseline	4.15	34.48	0.76	5.64	32.66	9.78	Baseline	16_001	31OCT16	31OCT2016	4.15	34.48	0.76	38.63	6.4	3.33947	4.15	34.48	0.76	5.64	38.63	6.4	3.33947								16	Early Termination	53	Male	31OCT16	152	Placebo	<250 mg/day	No	No	<250 mg/day	No	Yes	Yes	Yes	Yes	1
Week 12	1.68	16.15	0.68	7.48	35.82	11.74	Week 12	16_001	01FEB17	01FEB2017	1.68	16.15	0.68	17.83	8.16	3.05111	4.15	34.48	0.76	5.64	38.63	6.4	3.33947	-2.47	-18.33	-0.08	1.84	-20.8	1.76	-0.288361	16	Early Termination	53	Male	31OCT16	152	Placebo	<250 mg/day	No	No	<250 mg/day	No	Yes	Yes	Yes	Yes	94
Baseline	2.45	20.04	0.7	4.54	32.93	8.83	Baseline	16_002	03NOV16	03NOV2016	2.45	20.04	0.7	22.49	5.24	3.72933	2.45	20.04	0.7	4.54	22.49	5.24	3.72933								16	Early Termination	53	Male	03NOV16	154	MF4637	<250 mg/day	No	No	<250 mg/day	No	Yes	Yes	Yes	Yes	1
Week 12	6.42	33.02	1.21	6.67	33.98	12.14	Week 12	16_002	24JAN17	24JAN2017	6.42	33.02	1.21	39.44	7.88	2.79901	2.45	20.04	0.7	4.54	22.49	5.24	3.72933	3.97	12.98	0.51	2.13	16.95	2.64	-0.93032	16	Early Termination	53	Male	03NOV16	154	MF4637	<250 mg/day	No	No	<250 mg/day	No	Yes	Yes	Yes	Yes	83
Baseline	1.96	28.19	0.47	5.73	35.92	9.2	Baseline	16_003	03NOV16	03NOV2016	1.96	28.19	0.47	30.15	6.2	3.90435	1.96	28.19	0.47	5.73	30.15	6.2	3.90435								16	Entered	59	Male	03NOV16	153	Placebo	>=250 mg/day	No	No	>=250 mg/day	No	Yes	Yes	Yes	Yes	1
Week 12	2.39	23.05	0.53	5.78	38.72	9.7	Week 12	16_003	26JAN17	26JAN2017	2.39	23.05	0.53	25.44	6.31	3.99175	1.96	28.19	0.47	5.73	30.15	6.2	3.90435	0.43	-5.14	0.06	0.05	-4.71	0.11	0.0874048	16	Entered	59	Male	03NOV16	153	Placebo	>=250 mg/day	No	No	>=250 mg/day	No	Yes	Yes	Yes	Yes	85
Week 24	2.49	24.03	0.64	5.35	38.41	9.34	Week 24	16_003	27APR17	27APR2017	2.49	24.03	0.64	26.52	5.99	4.11242	1.96	28.19	0.47	5.73	30.15	6.2	3.90435	0.53	-4.16	0.17	-0.38	-3.63	-0.21	0.208072	16	Entered	59	Male	03NOV16	153	Placebo	>=250 mg/day	No	No	>=250 mg/day	No	Yes	Yes	Yes	Yes	176
Baseline	1.66	24.08	0.28	3.42	38.44	6.33	Baseline	16_005	11NOV16	11NOV2016	1.66	24.08	0.28	25.74	3.7	6.07267	1.66	24.08	0.28	3.42	25.74	3.7	6.07267								16	Entered	60	Male	12NOV16	155	MF4637	<250 mg/day	No	No	<250 mg/day	No	Yes	Yes	Yes	Yes	-1
Week 12	4.2	34.63	0.56	4.88	39.71	8.41	Week 12	16_005	03FEB17	03FEB2017	4.2	34.63	0.56	38.83	5.44	4.72176	1.66	24.08	0.28	3.42	25.74	3.7	6.07267	2.54	10.55	0.28	1.46	13.09	1.74	-1.35091	16	Entered	60	Male	12NOV16	155	MF4637	<250 mg/day	No	No	<250 mg/day	No	Yes	Yes	Yes	Yes	84
Week 24	3.91	32	0.59	5.1	39.04	8.39	Week 24	16_005	28APR17	28APR2017	3.91	32	0.59	35.91	5.69	4.65316	1.66	24.08	0.28	3.42	25.74	3.7	6.07267	2.25	7.92	0.31	1.68	10.17	1.99	-1.41951	16	Entered	60	Male	12NOV16	155	MF4637	<250 mg/day	No	No	<250 mg/day	No	Yes	Yes	Yes	Yes	168
Baseline	3.01	25.06	0.53	4.1	36.51	7.48	Baseline	16_007	28NOV16	28NOV2016	3.01	25.06	0.53	28.07	4.63	4.88102	3.01	25.06	0.53	4.1	28.07	4.63	4.88102								16	Entered	57	Female	28NOV16	156	Placebo	>=250 mg/day	No	No	>=250 mg/day	No	Yes	Yes	Yes	Yes	1
Week 12	4.14	31.3	0.53	4.82	39.06	8.42	Week 12	16_007	21FEB17	21FEB2017	4.14	31.3	0.53	35.44	5.35	4.63895	3.01	25.06	0.53	4.1	28.07	4.63	4.88102	1.13	6.24	0	0.72	7.37	0.72	-0.242061	16	Entered	57	Female	28NOV16	156	Placebo	>=250 mg/day	No	No	>=250 mg/day	No	Yes	Yes	Yes	Yes	86
Week 24	2.52	26.89	0.42	4.6	39.5	7.94	Week 24	16_007	10MAY17	10MAY2017	2.52	26.89	0.42	29.41	5.02	4.97481	3.01	25.06	0.53	4.1	28.07	4.63	4.88102	-0.49	1.83	-0.11	0.5	1.34	0.39	0.093795	16	Entered	57	Female	28NOV16	156	Placebo	>=250 mg/day	No	No	>=250 mg/day	No	Yes	Yes	Yes	Yes	164
Baseline	3.17	25.73	0.45	3.26	38.47	6.65	Baseline	16_008	18NOV16	18NOV2016	3.17	25.73	0.45	28.9	3.71	5.78496	3.17	25.73	0.45	3.26	28.9	3.71	5.78496								16	Entered	58	Female	18NOV16	158	MF4637	>=250 mg/day	No	No	>=250 mg/day	No	Yes	Yes	Yes	Yes	1
Week 12	3.94	23.08	0.75	4.61	39.6	8.76	Week 12	16_008	14FEB17	14FEB2017	3.94	23.08	0.75	27.02	5.36	4.52055	3.17	25.73	0.45	3.26	28.9	3.71	5.78496	0.77	-2.65	0.3	1.35	-1.88	1.65	-1.26441	16	Entered	58	Female	18NOV16	158	MF4637	>=250 mg/day	No	No	>=250 mg/day	No	Yes	Yes	Yes	Yes	89
Week 24	2.75	17.98	0.57	3.7	40.49	7.29	Week 24	16_008	16MAY17	16MAY2017	2.75	17.98	0.57	20.73	4.27	5.55418	3.17	25.73	0.45	3.26	28.9	3.71	5.78496	-0.42	-7.75	0.12	0.44	-8.17	0.56	-0.230779	16	Entered	58	Female	18NOV16	158	MF4637	>=250 mg/day	No	No	>=250 mg/day	No	Yes	Yes	Yes	Yes	180
Baseline	2.88	25.43	0.71	5.39	34.46	9.06	Baseline	17_001	08NOV16	08NOV2016	2.88	25.43	0.71	28.31	6.1	3.80353	2.88	25.43	0.71	5.39	28.31	6.1	3.80353								17	Entered	71	Male	08NOV16	212	Placebo	<250 mg/day	No	No	<250 mg/day	No	Yes	Yes	Yes	Yes	1
Week 12		9.04	0.52	6.57	37.85	10.17	Week 12	17_001	30JAN17	30JAN2017	0.5	9.04	0.52	9.54	7.09	3.72173	2.88	25.43	0.71	5.39	28.31	6.1	3.80353	-2.38	-16.39	-0.19	1.18	-18.77	0.99	-0.0818014	17	Entered	71	Male	08NOV16	212	Placebo	<250 mg/day	No	No	<250 mg/day	No	Yes	Yes	Yes	Yes	84
Week 24	3.23	29.27	0.57	5.5	37.99	8.75	Week 24	17_001	26APR17	26APR2017	3.23	29.27	0.57	32.5	6.07	4.34171	2.88	25.43	0.71	5.39	28.31	6.1	3.80353	0.35	3.84	-0.14	0.11	4.19	-0.03	0.538182	17	Entered	71	Male	08NOV16	212	Placebo	<250 mg/day	No	No	<250 mg/day	No	Yes	Yes	Yes	Yes	170
Baseline	2.3	31.04	0.4	4.84	36.21	7.85	Baseline	17_002	10NOV16	10NOV2016	2.3	31.04	0.4	33.34	5.24	4.61274	2.3	31.04	0.4	4.84	33.34	5.24	4.61274								17	Entered	70	Female	10NOV16	192	MF4637	<250 mg/day	Yes	No	<250 mg/day	No	Yes	Yes	Yes	Yes	1
Week 12	1.74	14.61	0.67	6.76	37.55	10.59	Week 12	17_002	01FEB17	01FEB2017	1.74	14.61	0.67	16.35	7.43	3.5458	2.3	31.04	0.4	4.84	33.34	5.24	4.61274	-0.56	-16.43	0.27	1.92	-16.99	2.19	-1.06694	17	Entered	70	Female	10NOV16	192	MF4637	<250 mg/day	Yes	No	<250 mg/day	No	Yes	Yes	Yes	Yes	84
Week 24	2.78	27.11	0.44	5.15	38.12	8.16	Week 24	17_002	26APR17	26APR2017	2.78	27.11	0.44	29.89	5.59	4.67157	2.3	31.04	0.4	4.84	33.34	5.24	4.61274	0.48	-3.93	0.04	0.31	-3.45	0.35	0.0588298	17	Entered	70	Female	10NOV16	192	MF4637	<250 mg/day	Yes	No	<250 mg/day	No	Yes	Yes	Yes	Yes	168
Baseline	3.92	27.76	0.7	4.49	35.38	8.6	Baseline	17_003	10NOV16	10NOV2016	3.92	27.76	0.7	31.68	5.19	4.11395	3.92	27.76	0.7	4.49	31.68	5.19	4.11395								17	Entered	62	Female	10NOV16	193	MF4637	>=250 mg/day	Yes	No	<250 mg/day	No	Yes	Yes	Yes	Yes	1
Week 12	11.09	36.93	2.49	8.61	31.87	15.88	Week 12	17_003	01FEB17	01FEB2017	11.09	36.93	2.49	48.02	11.1	2.00693	3.92	27.76	0.7	4.49	31.68	5.19	4.11395	7.17	9.17	1.79	4.12	16.34	5.91	-2.10703	17	Entered	62	Female	10NOV16	193	MF4637	>=250 mg/day	Yes	No	<250 mg/day	No	Yes	Yes	Yes	Yes	84
Week 24	5.76	40.61	1.08	7.6	34.28	12.54	Week 24	17_003	28APR17	28APR2017	5.76	40.61	1.08	46.37	8.68	2.73365	3.92	27.76	0.7	4.49	31.68	5.19	4.11395	1.84	12.85	0.38	3.11	14.69	3.49	-1.3803	17	Entered	62	Female	10NOV16	193	MF4637	>=250 mg/day	Yes	No	<250 mg/day	No	Yes	Yes	Yes	Yes	170
Baseline	3.98	27.27	0.69	4.41	35.03	8.51	Baseline	17_005	16NOV16	16NOV2016	3.98	27.27	0.69	31.25	5.1	4.11633	3.98	27.27	0.69	4.41	31.25	5.1	4.11633								17	Entered	65	Female	16NOV16	213	MF4637	<250 mg/day	No	No	<250 mg/day	No	Yes	Yes	Yes	Yes	1
Week 12	11.3	36.05	2.08	7.28	33.58	13.53	Week 12	17_005	08FEB17	08FEB2017	11.3	36.05	2.08	47.35	9.36	2.48189	3.98	27.27	0.69	4.41	31.25	5.1	4.11633	7.32	8.78	1.39	2.87	16.1	4.26	-1.63444	17	Entered	65	Female	16NOV16	213	MF4637	<250 mg/day	No	No	<250 mg/day	No	Yes	Yes	Yes	Yes	85
Week 24	2.85	25.69	0.58	5.09	38.34	8.69	Week 24	17_005	02MAY17	02MAY2017	2.85	25.69	0.58	28.54	5.67	4.41197	3.98	27.27	0.69	4.41	31.25	5.1	4.11633	-1.13	-1.58	-0.11	0.68	-2.71	0.57	0.295634	17	Entered	65	Female	16NOV16	213	MF4637	<250 mg/day	No	No	<250 mg/day	No	Yes	Yes	Yes	Yes	168
Baseline	1.53	21.67	0.44	4.98	36.93	8.44	Baseline	17_006	21NOV16	21NOV2016	1.53	21.67	0.44	23.2	5.42	4.37559	1.53	21.67	0.44	4.98	23.2	5.42	4.37559								17	Entered	61	Female	21NOV16	194	Placebo	<250 mg/day	No	No	<250 mg/day	No	Yes	Yes	Yes	Yes	1
Week 12	2.9	29.15	0.46	5.14	39.35	8.75	Week 12	17_006	14FEB17	14FEB2017	2.9	29.15	0.46	32.05	5.6	4.49714	1.53	21.67	0.44	4.98	23.2	5.42	4.37559	1.37	7.48	0.02	0.16	8.85	0.18	0.12155	17	Entered	61	Female	21NOV16	194	Placebo	<250 mg/day	No	No	<250 mg/day	No	Yes	Yes	Yes	Yes	86
Week 24	2.59	27.8	0.49	5.06	38.12	8.55	Week 24	17_006	09MAY17	09MAY2017	2.59	27.8	0.49	30.39	5.55	4.45848	1.53	21.67	0.44	4.98	23.2	5.42	4.37559	1.06	6.13	0.05	0.08	7.19	0.13	0.0828871	17	Entered	61	Female	21NOV16	194	Placebo	<250 mg/day	No	No	<250 mg/day	No	Yes	Yes	Yes	Yes	170
Baseline	1.58	24.69	0.51	5.86	36.11	9.39	Baseline	17_007	21NOV16	21NOV2016	1.58	24.69	0.51	26.27	6.37	3.84558	1.58	24.69	0.51	5.86	26.27	6.37	3.84558								17	Entered	61	Male	21NOV16	214	MF4637	<250 mg/day	No	No	<250 mg/day	No	Yes	Yes	Yes	Yes	1
Week 12	11.03	50.69	1.72	8.6	34	14.53	Week 12	17_007	14FEB17	14FEB2017	11.03	50.69	1.72	61.72	10.32	2.33999	1.58	24.69	0.51	5.86	26.27	6.37	3.84558	9.45	26	1.21	2.74	35.45	3.95	-1.50559	17	Entered	61	Male	21NOV16	214	MF4637	<250 mg/day	No	No	<250 mg/day	No	Yes	Yes	Yes	Yes	86
Week 24	6.83	37.13	1.6	8.9	32.8	14.79	Week 24	17_007	08MAY17	08MAY2017	6.83	37.13	1.6	43.96	10.5	2.21771	1.58	24.69	0.51	5.86	26.27	6.37	3.84558	5.25	12.44	1.09	3.04	17.69	4.13	-1.62787	17	Entered	61	Male	21NOV16	214	MF4637	<250 mg/day	No	No	<250 mg/day	No	Yes	Yes	Yes	Yes	169
Baseline	2.51	31.23	0.5	5.02	35.06	8.58	Baseline	17_008	25NOV16	25NOV2016	2.51	31.23	0.5	33.74	5.52	4.08625	2.51	31.23	0.5	5.02	33.74	5.52	4.08625								17	Entered	67	Female	25NOV16	195	Placebo	<250 mg/day	Yes	No	<250 mg/day	No	Yes	Yes	Yes	Yes	1
Week 12	1.72	23.52	0.4	5.83	37.87	9.49	Week 12	17_008	16FEB17	16FEB2017	1.72	23.52	0.4	25.24	6.23	3.99052	2.51	31.23	0.5	5.02	33.74	5.52	4.08625	-0.79	-7.71	-0.1	0.81	-8.5	0.71	-0.0957308	17	Entered	67	Female	25NOV16	195	Placebo	<250 mg/day	Yes	No	<250 mg/day	No	Yes	Yes	Yes	Yes	84
Week 24	3.32	32.16	0.4	4.45	37.24	7.86	Week 24	17_008	12MAY17	12MAY2017	3.32	32.16	0.4	35.48	4.85	4.73791	2.51	31.23	0.5	5.02	33.74	5.52	4.08625	0.81	0.93	-0.1	-0.57	1.74	-0.67	0.651666	17	Entered	67	Female	25NOV16	195	Placebo	<250 mg/day	Yes	No	<250 mg/day	No	Yes	Yes	Yes	Yes	169
Baseline	1.35	22.88	0.27	3.46	37.85	6.03	Baseline	17_009	25NOV16	25NOV2016	1.35	22.88	0.27	24.23	3.73	6.27695	1.35	22.88	0.27	3.46	24.23	3.73	6.27695								17	Entered	70	Male	25NOV16	215	Placebo	<250 mg/day	No	No	<250 mg/day	No	Yes	Yes	Yes	Yes	1
Week 12	1.4	17.2	0.29	3.9	40.03	6.58	Week 12	17_009	16FEB17	16FEB2017	1.4	17.2	0.29	18.6	4.19	6.08359	1.35	22.88	0.27	3.46	24.23	3.73	6.27695	0.05	-5.68	0.02	0.44	-5.63	0.46	-0.193362	17	Entered	70	Male	25NOV16	215	Placebo	<250 mg/day	No	No	<250 mg/day	No	Yes	Yes	Yes	Yes	84
Week 24	1.96	21.23	0.26	3.55	39.14	6.09	Week 24	17_009	12MAY17	12MAY2017	1.96	21.23	0.26	23.19	3.81	6.42693	1.35	22.88	0.27	3.46	24.23	3.73	6.27695	0.61	-1.65	-0.01	0.09	-1.04	0.08	0.149981	17	Entered	70	Male	25NOV16	215	Placebo	<250 mg/day	No	No	<250 mg/day	No	Yes	Yes	Yes	Yes	169
Baseline	1.62	26.37	0.31	4.42	37.75	7	Baseline	17_010	25NOV16	25NOV2016	1.62	26.37	0.31	27.99	4.73	5.39286	1.62	26.37	0.31	4.42	27.99	4.73	5.39286								17	Entered	68	Female	25NOV16	230	MF4637	<250 mg/day	No	No	<250 mg/day	No	Yes	Yes	Yes	Yes	1
Week 12	9.16	32.18	2.27	8.53	33.52	14.88	Week 12	17_010	16FEB17	16FEB2017	9.16	32.18	2.27	41.34	10.8	2.25269	1.62	26.37	0.31	4.42	27.99	4.73	5.39286	7.54	5.81	1.96	4.11	13.35	6.07	-3.14017	17	Entered	68	Female	25NOV16	230	MF4637	<250 mg/day	No	No	<250 mg/day	No	Yes	Yes	Yes	Yes	84
Week 24	6.66	32.57	1.54	7.73	33.11	13.16	Week 24	17_010	12MAY17	12MAY2017	6.66	32.57	1.54	39.23	9.27	2.51596	1.62	26.37	0.31	4.42	27.99	4.73	5.39286	5.04	6.2	1.23	3.31	11.24	4.54	-2.8769	17	Entered	68	Female	25NOV16	230	MF4637	<250 mg/day	No	No	<250 mg/day	No	Yes	Yes	Yes	Yes	169
Baseline	8.64	44.33	1.36	6.26	32.79	11.32	Baseline	18_001	17OCT16	17OCT2016	8.64	44.33	1.36	52.97	7.62	2.89664	8.64	44.33	1.36	6.26	52.97	7.62	2.89664								18	Entered	46	Female	18OCT16	220	Placebo	<250 mg/day	No	No	<250 mg/day	No	Yes	Yes	Yes	Yes	-1
Week 12	4.71	36.63	0.8	6.73	36.23	11.19	Week 12	18_001	09JAN17	09JAN2017	4.71	36.63	0.8	41.34	7.53	3.23771	8.64	44.33	1.36	6.26	52.97	7.62	2.89664	-3.93	-7.7	-0.56	0.47	-11.63	-0.09	0.341069	18	Entered	46	Female	18OCT16	220	Placebo	<250 mg/day	No	No	<250 mg/day	No	Yes	Yes	Yes	Yes	84
Week 24	2.36	19.59	0.61	5.8	37.05	9.68	Week 24	18_001	11APR17	11APR2017	2.36	19.59	0.61	21.95	6.41	3.82748	8.64	44.33	1.36	6.26	52.97	7.62	2.89664	-6.28	-24.74	-0.75	-0.46	-31.02	-1.21	0.930836	18	Entered	46	Female	18OCT16	220	Placebo	<250 mg/day	No	No	<250 mg/day	No	Yes	Yes	Yes	Yes	176
Baseline	2.11	15.18	0.62	3.28	37.96	6.89	Baseline	18_002	24OCT16	24OCT2016	2.11	15.18	0.62	17.29	3.9	5.50943	2.11	15.18	0.62	3.28	17.29	3.9	5.50943								18	Entered	52	Female	24OCT16	222	MF4637	<250 mg/day	No	No	<250 mg/day	No	Yes	Yes	Yes	Yes	1
Week 12	9.56	26.4	3.18	9.03	32.09	16.63	Week 12	18_002	19JAN17	19JAN2017	9.56	26.4	3.18	35.96	12.21	1.92965	2.11	15.18	0.62	3.28	17.29	3.9	5.50943	7.45	11.22	2.56	5.75	18.67	8.31	-3.57979	18	Entered	52	Female	24OCT16	222	MF4637	<250 mg/day	No	No	<250 mg/day	No	Yes	Yes	Yes	Yes	88
Week 24	3.61	15.43	1.87	7.93	33.61	13.9	Week 24	18_002	10APR17	10APR2017	3.61	15.43	1.87	19.04	9.8	2.41799	2.11	15.18	0.62	3.28	17.29	3.9	5.50943	1.5	0.25	1.25	4.65	1.75	5.9	-3.09145	18	Entered	52	Female	24OCT16	222	MF4637	<250 mg/day	No	No	<250 mg/day	No	Yes	Yes	Yes	Yes	169
Baseline	4.12	32.8	0.56	3.85	37.97	7.05	Baseline	18_003	26OCT16	26OCT2016	4.12	32.8	0.56	36.92	4.41	5.38582	4.12	32.8	0.56	3.85	36.92	4.41	5.38582								18	Entered	55	Female	26OCT16	221	Placebo	>=250 mg/day	Yes	Yes	>=250 mg/day	No	Yes	Yes	Yes	Yes	1
Week 24	4.16	20.71	0.73	3.66	39.23	7.45	Week 24	18_003	12APR17	12APR2017	4.16	20.71	0.73	24.87	4.39	5.26577	4.12	32.8	0.56	3.85	36.92	4.41	5.38582	0.04	-12.09	0.17	-0.19	-12.05	-0.02	-0.120044	18	Entered	55	Female	26OCT16	221	Placebo	>=250 mg/day	Yes	Yes	>=250 mg/day	No	Yes	Yes	Yes	Yes	169
Baseline	2.3	22.46	0.57	4.59	35.49	8.55	Baseline	19_001	28OCT16	28OCT2016	2.3	22.46	0.57	24.76	5.16	4.15088	2.3	22.46	0.57	4.59	24.76	5.16	4.15088								19	Entered	53	Female	28OCT16	225	Placebo	<250 mg/day	No	No	>=250 mg/day	No	Yes	Yes	Yes	Yes	1
Week 12	2.17	27.27	0.39	5.13	38.93	8.97	Week 12	19_001	19JAN17	19JAN2017	2.17	27.27	0.39	29.44	5.52	4.34002	2.3	22.46	0.57	4.59	24.76	5.16	4.15088	-0.13	4.81	-0.18	0.54	4.68	0.36	0.189145	19	Entered	53	Female	28OCT16	225	Placebo	<250 mg/day	No	No	>=250 mg/day	No	Yes	Yes	Yes	Yes	84
Week 24	1.64	23.7	0.27	4.71	37.01	8.03	Week 24	19_001	17APR17	17APR2017	1.64	23.7	0.27	25.34	4.98	4.60897	2.3	22.46	0.57	4.59	24.76	5.16	4.15088	-0.66	1.24	-0.3	0.12	0.58	-0.18	0.458089	19	Entered	53	Female	28OCT16	225	Placebo	<250 mg/day	No	No	>=250 mg/day	No	Yes	Yes	Yes	Yes	172
Baseline	1.76	18.11	0.51	4.02	36	7.55	Baseline	19_002	27OCT16	27OCT2016	1.76	18.11	0.51	19.87	4.53	4.76821	1.76	18.11	0.51	4.02	19.87	4.53	4.76821								19	Entered	37	Male	27OCT16	224	MF4637	<250 mg/day	No	No	<250 mg/day	No	Yes	Yes	Yes	Yes	1
Week 12	4.46	28.84	0.79	5.7	36.81	10.11	Week 12	19_002	18JAN17	18JAN2017	4.46	28.84	0.79	33.3	6.49	3.64095	1.76	18.11	0.51	4.02	19.87	4.53	4.76821	2.7	10.73	0.28	1.68	13.43	1.96	-1.12726	19	Entered	37	Male	27OCT16	224	MF4637	<250 mg/day	No	No	<250 mg/day	No	Yes	Yes	Yes	Yes	84
Week 24	4.51	28.18	0.77	5.16	36.7	9.2	Week 24	19_002	12APR17	12APR2017	4.51	28.18	0.77	32.69	5.93	3.98913	1.76	18.11	0.51	4.02	19.87	4.53	4.76821	2.75	10.07	0.26	1.14	12.82	1.4	-0.779081	19	Entered	37	Male	27OCT16	224	MF4637	<250 mg/day	No	No	<250 mg/day	No	Yes	Yes	Yes	Yes	168
Baseline	3.9	16.38	0.67	2.36	38.16	7.08	Baseline	19_004	04NOV16	04NOV2016	3.9	16.38	0.67	20.28	3.03	5.38983	3.9	16.38	0.67	2.36	20.28	3.03	5.38983								19	Entered	53	Female	04NOV16	226	MF4637	<250 mg/day	No	No	>=250 mg/day	No	Yes	Yes	Yes	Yes	1
Week 12	8.54	28.07	2.06	7.57	35.45	14.37	Week 12	19_004	27JAN17	27JAN2017	8.54	28.07	2.06	36.61	9.63	2.46695	3.9	16.38	0.67	2.36	20.28	3.03	5.38983	4.64	11.69	1.39	5.21	16.33	6.6	-2.92289	19	Entered	53	Female	04NOV16	226	MF4637	<250 mg/day	No	No	>=250 mg/day	No	Yes	Yes	Yes	Yes	85
Week 24	7.65	35.89	1.31	6.21	36.19	11.47	Week 24	19_004	21APR17	21APR2017	7.65	35.89	1.31	43.54	7.52	3.15519	3.9	16.38	0.67	2.36	20.28	3.03	5.38983	3.75	19.51	0.64	3.85	23.26	4.49	-2.23464	19	Entered	53	Female	04NOV16	226	MF4637	<250 mg/day	No	No	>=250 mg/day	No	Yes	Yes	Yes	Yes	169
Baseline	1.04	11.21	0.37	2.87	37.96	6.21	Baseline	19_005	04NOV16	04NOV2016	1.04	11.21	0.37	12.25	3.24	6.11272	1.04	11.21	0.37	2.87	12.25	3.24	6.11272								19	Entered	51	Male	04NOV16	227	Placebo	<250 mg/day	No	No	<250 mg/day	No	Yes	Yes	Yes	Yes	1
Week 12	7.82	27.62	1.48	5.6	37.59	10.9	Week 12	19_005	27JAN17	27JAN2017	7.82	27.62	1.48	35.44	7.08	3.44862	1.04	11.21	0.37	2.87	12.25	3.24	6.11272	6.78	16.41	1.11	2.73	23.19	3.84	-2.6641	19	Entered	51	Male	04NOV16	227	Placebo	<250 mg/day	No	No	<250 mg/day	No	Yes	Yes	Yes	Yes	85
Week 24	3.49	22.7	0.71	4.75	37.68	9.03	Week 24	19_005	21APR17	21APR2017	3.49	22.7	0.71	26.19	5.46	4.17276	1.04	11.21	0.37	2.87	12.25	3.24	6.11272	2.45	11.49	0.34	1.88	13.94	2.22	-1.93996	19	Entered	51	Male	04NOV16	227	Placebo	<250 mg/day	No	No	<250 mg/day	No	Yes	Yes	Yes	Yes	169
Baseline	3.02	28.57	0.6	4.57	35.89	8.34	Baseline	19_007	21NOV16	21NOV2016	3.02	28.57	0.6	31.59	5.17	4.30336	3.02	28.57	0.6	4.57	31.59	5.17	4.30336								19	Entered	50	Male	21NOV16	289	MF4637	<250 mg/day	No	No	>=250 mg/day	No	Yes	Yes	Yes	Yes	1
Week 12	9.96	35.47	1.95	7.56	34.41	13.52	Week 12	19_007	13FEB17	13FEB2017	9.96	35.47	1.95	45.43	9.51	2.54512	3.02	28.57	0.6	4.57	31.59	5.17	4.30336	6.94	6.9	1.35	2.99	13.84	4.34	-1.75824	19	Entered	50	Male	21NOV16	289	MF4637	<250 mg/day	No	No	>=250 mg/day	No	Yes	Yes	Yes	Yes	85
Week 24	8.65	43.01	1.52	7.35	34.21	12.56	Week 24	19_007	08MAY17	08MAY2017	8.65	43.01	1.52	51.66	8.87	2.72373	3.02	28.57	0.6	4.57	31.59	5.17	4.30336	5.63	14.44	0.92	2.78	20.07	3.7	-1.57963	19	Entered	50	Male	21NOV16	289	MF4637	<250 mg/day	No	No	>=250 mg/day	No	Yes	Yes	Yes	Yes	169
Baseline	2.92	27.55	0.57	4.67	38.54	7.93	Baseline	19_009	21NOV16	21NOV2016	2.92	27.55	0.57	30.47	5.24	4.86003	2.92	27.55	0.57	4.67	30.47	5.24	4.86003								19	Entered	49	Female	21NOV16	290	Placebo	<250 mg/day	No	No	>=250 mg/day	No	Yes	Yes	Yes	Yes	1
Week 12	3.92	29.83	0.64	5.35	41.47	9.02	Week 12	19_009	13FEB17	13FEB2017	3.92	29.83	0.64	33.75	5.99	4.59756	2.92	27.55	0.57	4.67	30.47	5.24	4.86003	1	2.28	0.07	0.68	3.28	0.75	-0.262464	19	Entered	49	Female	21NOV16	290	Placebo	<250 mg/day	No	No	>=250 mg/day	No	Yes	Yes	Yes	Yes	85
Week 24	4.18	25.99	0.87	5.94	39.58	9.77	Week 24	19_009	08MAY17	08MAY2017	4.18	25.99	0.87	30.17	6.81	4.05118	2.92	27.55	0.57	4.67	30.47	5.24	4.86003	1.26	-1.56	0.3	1.27	-0.3	1.57	-0.808848	19	Entered	49	Female	21NOV16	290	Placebo	<250 mg/day	No	No	>=250 mg/day	No	Yes	Yes	Yes	Yes	169
Baseline	2.7	33.26	0.51	5.42	35.24	9.02	Baseline	19_010	21NOV16	21NOV2016	2.7	33.26	0.51	35.96	5.93	3.90687	2.7	33.26	0.51	5.42	35.96	5.93	3.90687								19	Entered	33	Male	21NOV16	291	MF4637	<250 mg/day	No	No	>=250 mg/day	No	Yes	Yes	Yes	Yes	1
Week 12	2.04	24.74	0.53	6.97	37.45	10.78	Week 12	19_010	13FEB17	13FEB2017	2.04	24.74	0.53	26.78	7.5	3.47403	2.7	33.26	0.51	5.42	35.96	5.93	3.90687	-0.66	-8.52	0.02	1.55	-9.18	1.57	-0.432848	19	Entered	33	Male	21NOV16	291	MF4637	<250 mg/day	No	No	>=250 mg/day	No	Yes	Yes	Yes	Yes	85
Week 24	3.19	36.57	0.55	6.84	36.34	10.44	Week 24	19_010	08MAY17	08MAY2017	3.19	36.57	0.55	39.76	7.39	3.48084	2.7	33.26	0.51	5.42	35.96	5.93	3.90687	0.49	3.31	0.04	1.42	3.8	1.46	-0.426031	19	Entered	33	Male	21NOV16	291	MF4637	<250 mg/day	No	No	>=250 mg/day	No	Yes	Yes	Yes	Yes	169
Baseline	2.05	23.08	0.45	4.33	36.32	7.77	Baseline	19_012	21NOV16	21NOV2016	2.05	23.08	0.45	25.13	4.78	4.67439	2.05	23.08	0.45	4.33	25.13	4.78	4.67439								19	Entered	55	Female	21NOV16	288	Placebo	<250 mg/day	Yes	No	>=250 mg/day	No	Yes	Yes	Yes	Yes	1
Week 12	5.52	36.2	0.93	6.64	37.23	11.15	Week 12	19_012	13FEB17	13FEB2017	5.52	36.2	0.93	41.72	7.57	3.33901	2.05	23.08	0.45	4.33	25.13	4.78	4.67439	3.47	13.12	0.48	2.31	16.59	2.79	-1.33538	19	Entered	55	Female	21NOV16	288	Placebo	<250 mg/day	Yes	No	>=250 mg/day	No	Yes	Yes	Yes	Yes	85
Week 24	3.93	32.94	0.54	4.92	37.45	8.76	Week 24	19_012	05MAY17	05MAY2017	3.93	32.94	0.54	36.87	5.46	4.27511	2.05	23.08	0.45	4.33	25.13	4.78	4.67439	1.88	9.86	0.09	0.59	11.74	0.68	-0.399275	19	Entered	55	Female	21NOV16	288	Placebo	<250 mg/day	Yes	No	>=250 mg/day	No	Yes	Yes	Yes	Yes	166
