# Supplementary material for: Evaluation of a High Concentrate Omega-3 for Correcting the Omega-3 Fatty Acid Nutritional Deficiency in Non-alcoholic Fatty Liver Disease and effects on Hepatic Steatosis (CONDIN)
Source: Preprints.org preprint supplement (doi:10.20944/preprints201807.0240.v1), 2018-07-13
Supplement: Supplementary file 15 [file RP.xlsx]

## Sheet: RP
VISIT	OTHSTERC	CONTRAOT	LOT_NUM	COMMENTS	RPSTAT	CONTRA	RPORRES	SUBJID	VISITNUM	SUSTERDT	CDSUSTER	LMENSTDT	CDLMENST	EXPDT	CDEXP	SAMPLEDT	CDSAMPLE	SITE	STATUS	AGE	SEX	FIRSTDT	RANDNO	TREAT	OMEGA	DIABETE	STATIN	OMEGA_C	SFFL	SAFETY	ITT	MITT	PP
Visit 1					Postmenopausal			02_001	1			01JAN06	01JAN2006					02	Entered	57	Female	27OCT15	108	MF4637	<250 mg/day	Yes	Yes	<250 mg/day	No	Yes	Yes	Yes	Yes
Visit 1					Postmenopausal			02_004	1			11APR03	11APR2003					02	Early Termination	60	Female	12NOV15	111	Placebo	<250 mg/day	Yes	Yes	<250 mg/day	No	Yes	Yes	Yes	Yes
Visit 1			18370		Child bearing potential	Double barrier	Negative	02_006	1					17FEB17	17FEB2017	11DEC15	11DEC2015	02	Screen Failure	39	Female							<250 mg/day	Yes	No	No	No	No
Visit 1					Total hysterectomy			03_002	1	10APR07	10APR2007							03	Early Termination	52	Female	30OCT15	116	Placebo	<250 mg/day	No	No	<250 mg/day	No	Yes	Yes	Yes	Yes
Visit 1					Postmenopausal			03_004	1									03	Entered	56	Female	24NOV15	118	Placebo	<250 mg/day	No	No	>=250 mg/day	No	Yes	Yes	Yes	Yes
Visit 1					Postmenopausal			03_005	1									03	Early Termination	49	Female	25NOV15	119	MF4637	>=250 mg/day	No	No	<250 mg/day	No	Yes	Yes	Yes	Yes
Visit 1					Total hysterectomy			03_013	1		1987							03	Entered	61	Female	11FEB16	189	Placebo	<250 mg/day	No	Yes	<250 mg/day	No	Yes	Yes	Yes	Yes
Visit 1				Tubal Ligation bilateral	Surgical sterilization			04_001	1	21MAR07	21MAR2007							04	Entered	49	Female	13OCT15	124	Placebo	>=250 mg/day	Yes	No	>=250 mg/day	No	Yes	Yes	Yes	Yes
Visit 1			1039601		Child bearing potential	Intra-uterine device	Negative	04_003	1					26SEP16	26SEP2016	07OCT15	07OCT2015	04	Screen Failure	35	Female							<250 mg/day	Yes	No	No	No	No
Visit 1					Total hysterectomy			04_005	1	01OCT13	01OCT2013							04	Screen Failure	40	Female							<250 mg/day	Yes	No	No	No	No
Visit 1					Total hysterectomy			04_006	1	01APR14	01APR2014							04	Screen Failure	54	Female							>=250 mg/day	Yes	No	No	No	No
Visit 1					Postmenopausal			04_007	1									04	Screen Failure	59	Female							>=250 mg/day	Yes	No	No	No	No
Visit 1			5091500		Child bearing potential	Double barrier	Negative	04_008	1					01SEP17	01SEP2017	04NOV15	04NOV2015	04	Screen Failure	25	Female							>=250 mg/day	Yes	No	No	No	No
Visit 1					Postmenopausal			04_009	1			01JAN10	01JAN2010					04	Entered	53	Female	04JAN16	127	Placebo	<250 mg/day	No	No	<250 mg/day	No	Yes	Yes	Yes	Yes
Visit 1			111866		Child bearing potential	Double barrier	Negative	04_010	1					25SEP16	25SEP2016	29DEC15	29DEC2015	04	Entered	25	Female	05JAN16	126	MF4637	>=250 mg/day	No	No	>=250 mg/day	No	Yes	Yes	Yes	Yes
Visit 1					Postmenopausal			04_013	1				2006					04	Entered	64	Female	15FEB16	130	MF4637	<250 mg/day	No	Yes	<250 mg/day	No	Yes	Yes	Yes	Yes
Visit 1			18541		Child bearing potential	Double barrier	Negative	04_014	1					01JUN17	01JUN2017	15FEB16	15FEB2016	04	Entered	35	Female	25FEB16	131	MF4637	>=250 mg/day	No	No	>=250 mg/day	No	Yes	Yes	Yes	Yes
Visit 1					bilateral tubal ligation			04_019	1	13OCT04	13OCT2004							04	Early Termination	50	Female		200	Placebo	<250 mg/day	No	No	<250 mg/day	No	No	Yes	No	No
Visit 1			111866		Child bearing potential	Double barrier	Negative	04_022	1					25SEP16	25SEP2016	21JUL16	21JUL2016	04	Entered	44	Female	28JUL16	199	Placebo	>=250 mg/day	No	No	>=250 mg/day	No	Yes	Yes	Yes	Yes
Visit 1					Postmenopausal			04_024	1			01JAN08	01JAN2008					04	Screen Failure	55	Female							<250 mg/day	Yes	No	No	No	No
Visit 1			111866		Child bearing potential	Double barrier	Negative	04_027	1					25SEP16	25SEP2016	04AUG16	04AUG2016	04	Early Termination	39	Female		201	Placebo	>=250 mg/day	No	No	>=250 mg/day	No	No	Yes	No	No
Visit 1					bilateral tubal ligation			04_030	1	01JAN85	01JAN1985							04	Entered	67	Female	15SEP16	216	MF4637	>=250 mg/day	Yes	No	>=250 mg/day	No	Yes	Yes	Yes	Yes
Visit 1					Postmenopausal			04_032	1			01JAN12	01JAN2012					04	Early Termination	53	Female	22SEP16	218	MF4637	<250 mg/day	No	No	<250 mg/day	No	Yes	Yes	No	No
Visit 1					Postmenopausal			04_035	1			01JAN10	01JAN2010					04	Entered	59	Female	10OCT16	219	Placebo	>=250 mg/day	No	No	>=250 mg/day	No	Yes	Yes	Yes	Yes
Visit 1					Postmenopausal			09_007	1			04FEB14	04FEB2014					09	Screen Failure	49	Female							>=250 mg/day	Yes	No	No	No	No
Visit 1					Postmenopausal			09_009	1			10FEB70	10FEB1970					09	Screen Failure	73	Female							>=250 mg/day	Yes	No	No	No	No
Visit 1					Postmenopausal			09_010	1				1992					09	Screen Failure	73	Female							>=250 mg/day	Yes	No	No	No	No
Visit 1					Total hysterectomy			09_011	1	02MAR88	02MAR1988							09	Screen Failure	68	Female							<250 mg/day	Yes	No	No	No	No
Visit 1					Postmenopausal			09_013	1			15JUN11	15JUN2011					09	Screen Failure	57	Female							<250 mg/day	Yes	No	No	No	No
Visit 1					Postmenopausal			09_016	1			15JUN96	15JUN1996					09	Screen Failure	74	Female							<250 mg/day	Yes	No	No	No	No
Visit 1					Postmenopausal			09_017	1			15JUN01	15JUN2001					09	Screen Failure	69	Female							<250 mg/day	Yes	No	No	No	No
Visit 1					Postmenopausal			09_019	1				1992					09	Screen Failure	74	Female							<250 mg/day	Yes	No	No	No	No
Visit 1					Postmenopausal			09_020	1				2013					09	Entered	53	Female	14OCT16	169	MF4637	>=250 mg/day	Yes	No	<250 mg/day	No	Yes	Yes	Yes	Yes
Visit 1					Postmenopausal			09_023	1			15JUN01	15JUN2001					09	Screen Failure	68	Female							<250 mg/day	Yes	No	No	No	No
Visit 1					Postmenopausal			09_025	1				2004					09	Screen Failure	70	Female							<250 mg/day	Yes	No	No	No	No
Visit 1					Postmenopausal			09_026	1			15JUN08	15JUN2008					09	Entered	55	Female	12DEC16	171	Placebo	>=250 mg/day	No	No	<250 mg/day	No	Yes	Yes	Yes	Yes
Visit 1					Postmenopausal			09_027	1			11APR06	11APR2006					09	Early Termination	60	Female	12DEC16	107	Placebo	>=250 mg/day	Yes	No	<250 mg/day	No	Yes	Yes	No	No
Visit 1					Surgical sterilization			09_028	1	12AUG04	12AUG2004							09	Screen Failure	44	Female							<250 mg/day	Yes	No	No	No	No
Visit 1					Postmenopausal			09_029	1			09OCT03	09OCT2003					09	Early Termination	63	Female	12DEC16	106	MF4637	>=250 mg/day	Yes	No	<250 mg/day	No	Yes	Yes	No	No
Visit 1					Postmenopausal			09_030	1			15OCT09	15OCT2009					09	Entered	59	Female	12DEC16	170	MF4637	>=250 mg/day	No	No	<250 mg/day	No	Yes	Yes	Yes	Yes
Visit 1					Partial hysterectomy			10_003	1		1999							10	Screen Failure	54	Female							<250 mg/day	Yes	No	No	No	No
Visit 1					Partial hysterectomy			10_007	1		1999							10	Entered	54	Female	01MAR16	173	MF4637	<250 mg/day	No	Yes	<250 mg/day	No	Yes	Yes	Yes	Yes
Visit 1					Total hysterectomy			10_009	1		1991							10	Entered	64	Female	27JUN16	176	MF4637	<250 mg/day	No	No	<250 mg/day	No	Yes	Yes	Yes	Yes
Visit 1					Surgical sterilization			11_004	1		NOV2007							11	Entered	42	Female	02SEP16	140	MF4637	<250 mg/day	Yes	No	<250 mg/day	No	Yes	Yes	Yes	Yes
Visit 1					Postmenopausal			11_006	1				2008					11	Entered	54	Female	29SEP16	146	Placebo	<250 mg/day	Yes	No	>=250 mg/day	No	Yes	Yes	Yes	Yes
Visit 1					bilateral tubal ligation			11_007	1		1995							11	Screen Failure	48	Female							>=250 mg/day	Yes	No	No	No	No
Visit 1					Total hysterectomy			11_009	1		2006							11	Entered	50	Female	01OCT16	147	Placebo	<250 mg/day	No	No	<250 mg/day	No	Yes	Yes	Yes	Yes
Visit 1			6032305		Child bearing potential	Intra-uterine device	Negative	11_010	1						APR2018	15SEP16	15SEP2016	11	Entered	52	Female	27SEP16	143	Placebo	<250 mg/day	No	Yes	<250 mg/day	No	Yes	Yes	Yes	Yes
Visit 1			6032305		Child bearing potential	Double barrier	Negative	11_011	1						APR2018	19SEP16	19SEP2016	11	Entered	41	Female	19OCT16	244	Placebo	<250 mg/day	No	No	>=250 mg/day	No	Yes	Yes	Yes	Yes
Visit 1					bilateral tubal ligation			11_012	1		2002							11	Entered	40	Female	18OCT16	145	MF4637	<250 mg/day	No	No	<250 mg/day	No	Yes	Yes	Yes	Yes
Visit 1					bilateral tubal ligation			11_014	1		2006							11	Entered	49	Female	17NOV16	247	Placebo	>=250 mg/day	No	No	>=250 mg/day	No	Yes	Yes	Yes	No
Visit 1				UN	Surgical sterilization			11_016	1		2008							11	Screen Failure	55	Female							>=250 mg/day	Yes	No	No	No	No
Visit 1			6032305		Child bearing potential	Double barrier	Negative	11_017	1						APR2018	08NOV16	08NOV2016	11	Entered	32	Female	28NOV16	246	MF4637	<250 mg/day	No	No	<250 mg/day	No	Yes	Yes	Yes	Yes
Visit 1					bilateral tubal ligation			11_018	1	31DEC03	31DEC2003							11	Entered	45	Female	29NOV16	248	Placebo	<250 mg/day	No	No	>=250 mg/day	No	Yes	Yes	Yes	Yes
Visit 1					Postmenopausal			12_006	1				1988					12	Entered	76	Female	22SEP16	132	MF4637	<250 mg/day	Yes	Yes	<250 mg/day	No	Yes	Yes	Yes	Yes
Visit 1					Postmenopausal			12_007	1				2000					12	Entered	64	Female	30SEP16	134	Placebo	>=250 mg/day	No	Yes	>=250 mg/day	No	Yes	Yes	Yes	Yes
Visit 1					Postmenopausal			12_009	1				2011					12	Early Termination	53	Female	26OCT16	260	MF4637	>=250 mg/day	Yes	Yes	>=250 mg/day	No	Yes	Yes	Yes	Yes
Visit 1					Postmenopausal			12_013	1				12UNK2013					12	Entered	52	Female	30SEP16	137	MF4637	>=250 mg/day	No	Yes	>=250 mg/day	No	Yes	Yes	Yes	Yes
Visit 1					Postmenopausal			12_014	1				1999					12	Entered	66	Female	30SEP16	136	Placebo	>=250 mg/day	Yes	Yes	>=250 mg/day	No	Yes	Yes	Yes	Yes
Visit 1					Surgical sterilization			12_015	1	26JUN90	26JUN1990							12	Early Termination	47	Female	30SEP16	135	MF4637	>=250 mg/day	Yes	Yes	>=250 mg/day	No	Yes	Yes	Yes	Yes
Visit 1					Surgical sterilization			12_016	1		2010							12	Entered	52	Female	05OCT16	103	MF4637	<250 mg/day	No	No	<250 mg/day	No	Yes	Yes	Yes	Yes
Visit 1					Postmenopausal			12_017	1				2010					12	Entered	57	Female	05OCT16	100	Placebo	>=250 mg/day	Yes	Yes	>=250 mg/day	No	Yes	Yes	Yes	Yes
Visit 1					Postmenopausal			12_020	1				2004					12	Entered	60	Female	05OCT16	101	MF4637	>=250 mg/day	Yes	Yes	>=250 mg/day	No	Yes	Yes	Yes	Yes
Visit 1			19016		Child bearing potential	Double barrier	Negative	12_024	1						APR2018	03OCT16	03OCT2016	12	Early Termination	41	Female	11OCT16	139	MF4637	>=250 mg/day	Yes	No	>=250 mg/day	No	Yes	Yes	Yes	Yes
Visit 1					Postmenopausal			12_027	1				2010					12	Entered	56	Female	12OCT16	252	Placebo	<250 mg/day	No	Yes	<250 mg/day	No	Yes	Yes	Yes	Yes
Visit 1					Surgical sterilization			12_028	1	15JUL72	15JUL1972							12	Entered	71	Female	14OCT16	259	Placebo	<250 mg/day	Yes	Yes	<250 mg/day	No	Yes	Yes	Yes	Yes
Visit 1					Postmenopausal			12_033	1				1994					12	Entered	72	Female	02NOV16	282	MF4637	>=250 mg/day	Yes	No	>=250 mg/day	No	Yes	Yes	Yes	Yes
Visit 1					Postmenopausal			12_034	1				2008					12	Entered	55	Female	26OCT16	261	Placebo	>=250 mg/day	Yes	No	>=250 mg/day	No	Yes	Yes	Yes	No
Visit 1					Postmenopausal			12_040	1				2005					12	Entered	60	Female	10NOV16	292	MF4637	>=250 mg/day	Yes	Yes	>=250 mg/day	No	Yes	Yes	Yes	Yes
Visit 1					Postmenopausal			12_041	1				2009					12	Early Termination	54	Female	10NOV16	293	Placebo	>=250 mg/day	Yes	Yes	>=250 mg/day	No	Yes	Yes	Yes	Yes
Visit 1					Postmenopausal			12_048	1				2006					12	Entered	63	Female	03NOV16	285	MF4637	<250 mg/day	Yes	No	<250 mg/day	No	Yes	Yes	Yes	Yes
Visit 1					Postmenopausal			12_054	1				2009					12	Entered	60	Female	03NOV16	286	Placebo	>=250 mg/day	Yes	Yes	>=250 mg/day	No	Yes	Yes	Yes	Yes
Visit 1					Total hysterectomy			12_057	1		1986							12	Entered	65	Female	10NOV16	294	Placebo	<250 mg/day	Yes	No	<250 mg/day	No	Yes	Yes	Yes	Yes
Visit 1					Postmenopausal			12_065	1				1977					12	Entered	76	Female	16NOV16	182	MF4637	<250 mg/day	Yes	Yes	<250 mg/day	No	Yes	Yes	Yes	Yes
Visit 1					Postmenopausal			12_067	1				2003					12	Entered	72	Female	16NOV16	180	MF4637	>=250 mg/day	Yes	Yes	>=250 mg/day	No	Yes	Yes	Yes	Yes
Visit 1					Postmenopausal			12_068	1				1985					12	Entered	78	Female	21NOV16	183	Placebo	>=250 mg/day	Yes	Yes	>=250 mg/day	No	Yes	Yes	Yes	Yes
Visit 1					Surgical sterilization			13_001	1	29JUN99	29JUN1999							13	Entered	42	Female	28OCT16	162	Placebo	<250 mg/day	No	No	>=250 mg/day	No	Yes	Yes	Yes	Yes
Visit 1					Postmenopausal			13_002	1				APR2003					13	Entered	67	Female	20OCT16	204	MF4637	<250 mg/day	Yes	Yes	<250 mg/day	No	Yes	Yes	Yes	Yes
Visit 1					Postmenopausal			13_003	1				2001					13	Entered	65	Female	20OCT16	205	Placebo	<250 mg/day	Yes	Yes	<250 mg/day	No	Yes	Yes	Yes	Yes
Visit 1					Postmenopausal			13_004	1				1990					13	Entered	69	Female	20OCT16	206	MF4637	<250 mg/day	No	Yes	<250 mg/day	No	Yes	Yes	Yes	Yes
Visit 1					Surgical sterilization			13_007	1		JAN1997							13	Screen Failure	57	Female								Yes	No	No	No	No
Visit 1					Postmenopausal			13_014	1				1990					13	Entered	71	Female	03NOV16	266	Placebo	<250 mg/day	No	Yes	<250 mg/day	No	Yes	Yes	Yes	Yes
Visit 1					Postmenopausal			13_016	1				1997					13	Entered	70	Female	28OCT16	163	Placebo	<250 mg/day	No	Yes	>=250 mg/day	No	Yes	Yes	Yes	Yes
Visit 1					Surgical sterilization			13_017	1		2001							13	Entered	52	Female	03NOV16	265	MF4637	<250 mg/day	Yes	Yes	>=250 mg/day	No	Yes	Yes	Yes	Yes
Visit 1					Total hysterectomy			13_019	1	24NOV08	24NOV2008							13	Entered	47	Female	23NOV16	278	Placebo	<250 mg/day	No	No	<250 mg/day	No	Yes	Yes	Yes	Yes
Visit 1					Surgical sterilization			14_002	1	27MAY04	27MAY2004							14	Entered	44	Female	12OCT16	208	MF4637	<250 mg/day	No	Yes	>=250 mg/day	No	Yes	Yes	Yes	Yes
Visit 1				Screening pregnancy U/A is not stated in protocol nor were supply sent for UA . I confirmed with sponsor the request was not part of the protocol there for not done.	Child bearing potential	Oral, ingested, or transdermal contraceptive drugs		14_006	1									14	Screen Failure	33	Female							>=250 mg/day	Yes	No	No	No	No
Visit 1					Postmenopausal			14_010	1			01MAY15	01MAY2015					14	Early Termination	61	Female		184	MF4637	<250 mg/day	No	No	>=250 mg/day	No	No	Yes	No	No
Visit 1					Child bearing potential	Intra-uterine device		14_014	1									14	Entered	33	Female	16NOV16	187	MF4637	<250 mg/day	No	No	>=250 mg/day	No	Yes	Yes	Yes	Yes
Visit 1				not required per protocol (not in protocol) sponsor notified. Ixsa	Child bearing potential	Double barrier		14_016	1									14	Entered	51	Female	01DEC16	209	Placebo	<250 mg/day	No	No	<250 mg/day	No	Yes	Yes	Yes	Yes
Visit 1					Surgical sterilization			14_018	1	04JUN12	04JUN2012							14	Entered	25	Female	05DEC16	210	MF4637	>=250 mg/day	No	No	>=250 mg/day	No	Yes	Yes	Yes	Yes
Visit 1					Postmenopausal			15_009	1			04APR90	04APR1990					15	Entered	70	Female	10OCT16	237	MF4637	<250 mg/day	No	No	<250 mg/day	No	Yes	Yes	Yes	Yes
Visit 1					Postmenopausal			15_010	1			21SEP04	21SEP2004					15	Entered	64	Female	11OCT16	238	Placebo	<250 mg/day	No	No	<250 mg/day	No	Yes	Yes	Yes	Yes
Visit 1					Postmenopausal			15_012	1			28APR09	28APR2009					15	Entered	54	Female	19OCT16	241	Placebo	<250 mg/day	No	No	<250 mg/day	No	Yes	Yes	Yes	Yes
Visit 1					Postmenopausal			15_013	1			21JUL08	21JUL2008					15	Entered	58	Female	13OCT16	242	MF4637	<250 mg/day	No	No	>=250 mg/day	No	Yes	Yes	Yes	Yes
Visit 1					Postmenopausal			15_014	1			17JUN05	17JUN2005					15	Entered	55	Female	13OCT16	239	MF4637	<250 mg/day	No	No	>=250 mg/day	No	Yes	Yes	Yes	Yes
Visit 1					Postmenopausal			15_015	1			22JUL75	22JUL1975					15	Entered	81	Female	09NOV16	268	MF4637	<250 mg/day	No	No	<250 mg/day	No	Yes	Yes	Yes	Yes
Visit 1					Postmenopausal			15_016	1			27AUG96	27AUG1996					15	Entered	77	Female	09NOV16	243	MF4637	<250 mg/day	Yes	No	>=250 mg/day	No	Yes	Yes	Yes	Yes
Visit 1					Surgical sterilization			15_019	1	07APR99	07APR1999							15	Entered	38	Female	17NOV16	271	Placebo	<250 mg/day	No	No	>=250 mg/day	No	Yes	Yes	Yes	Yes
Visit 1					Surgical sterilization			15_020	1	20SEP87	20SEP1987							15	Early Termination	65	Female	30NOV16	272	MF4637	<250 mg/day	No	No	>=250 mg/day	No	Yes	Yes	Yes	Yes
Visit 1					Surgical sterilization			15_023	1	18AUG03	18AUG2003							15	Entered	58	Female	06DEC16	275	MF4637	<250 mg/day	No	No	>=250 mg/day	No	Yes	Yes	Yes	Yes
Visit 1					Postmenopausal			15_024	1			05AUG97	05AUG1997					15	Screen Failure	74	Female							<250 mg/day	Yes	No	No	No	No
Visit 1					Postmenopausal			15_026	1			11SEP96	11SEP1996					15	Screen Failure	70	Female							>=250 mg/day	Yes	No	No	No	No
Visit 1					Postmenopausal			16_007	1			01JAN11	01JAN2011					16	Entered	57	Female	28NOV16	156	Placebo	>=250 mg/day	No	No	>=250 mg/day	No	Yes	Yes	Yes	Yes
Visit 1					Postmenopausal			16_008	1			01OCT08	01OCT2008					16	Entered	58	Female	18NOV16	158	MF4637	>=250 mg/day	No	No	>=250 mg/day	No	Yes	Yes	Yes	Yes
Visit 1					Postmenopausal			17_002	1									17	Entered	70	Female	10NOV16	192	MF4637	<250 mg/day	Yes	No	<250 mg/day	No	Yes	Yes	Yes	Yes
Visit 1					Postmenopausal			17_003	1									17	Entered	62	Female	10NOV16	193	MF4637	>=250 mg/day	Yes	No	<250 mg/day	No	Yes	Yes	Yes	Yes
Visit 1					Postmenopausal			17_005	1				2006					17	Entered	65	Female	16NOV16	213	MF4637	<250 mg/day	No	No	<250 mg/day	No	Yes	Yes	Yes	Yes
Visit 1					Postmenopausal			17_006	1				2005					17	Entered	61	Female	21NOV16	194	Placebo	<250 mg/day	No	No	<250 mg/day	No	Yes	Yes	Yes	Yes
Visit 1					Postmenopausal			17_008	1				1998					17	Entered	67	Female	25NOV16	195	Placebo	<250 mg/day	Yes	No	<250 mg/day	No	Yes	Yes	Yes	Yes
Visit 1					Postmenopausal			17_010	1				2003					17	Entered	68	Female	25NOV16	230	MF4637	<250 mg/day	No	No	<250 mg/day	No	Yes	Yes	Yes	Yes
Visit 1					Postmenopausal			17_011	1				1973					17	Screen Failure	58	Female							<250 mg/day	Yes	No	No	No	No
Visit 1					bilateral tubal ligation			18_001	1	10AUG00	10AUG2000							18	Entered	46	Female	18OCT16	220	Placebo	<250 mg/day	No	No	<250 mg/day	No	Yes	Yes	Yes	Yes
Visit 1					bilateral tubal ligation			18_002	1	29NOV11	29NOV2011							18	Entered	52	Female	24OCT16	222	MF4637	<250 mg/day	No	No	<250 mg/day	No	Yes	Yes	Yes	Yes
Visit 1					Total hysterectomy			18_003	1	01MAY02	01MAY2002							18	Entered	55	Female	26OCT16	221	Placebo	>=250 mg/day	Yes	Yes	>=250 mg/day	No	Yes	Yes	Yes	Yes
Visit 1					Postmenopausal			19_001	1				2012					19	Entered	53	Female	28OCT16	225	Placebo	<250 mg/day	No	No	>=250 mg/day	No	Yes	Yes	Yes	Yes
Visit 1					Postmenopausal			19_003	1				2003					19	Screen Failure	59	Female							>=250 mg/day	Yes	No	No	No	No
Visit 1					Postmenopausal			19_004	1				2008					19	Entered	53	Female	04NOV16	226	MF4637	<250 mg/day	No	No	>=250 mg/day	No	Yes	Yes	Yes	Yes
Visit 1					Postmenopausal			19_008	1				1999					19	Screen Failure	65	Female							>=250 mg/day	Yes	No	No	No	No
Visit 1					Postmenopausal			19_009	1				2013					19	Entered	49	Female	21NOV16	290	Placebo	<250 mg/day	No	No	>=250 mg/day	No	Yes	Yes	Yes	Yes
Visit 1					Postmenopausal			19_011	1				1996					19	Screen Failure	72	Female							>=250 mg/day	Yes	No	No	No	No
Visit 1					Postmenopausal			19_012	1				2008					19	Entered	55	Female	21NOV16	288	Placebo	<250 mg/day	Yes	No	>=250 mg/day	No	Yes	Yes	Yes	Yes
Visit 1					Postmenopausal			19_013	1				2004					19	Screen Failure	65	Female							>=250 mg/day	Yes	No	No	No	No
