# Supplementary material for: Evaluation of a High Concentrate Omega-3 for Correcting the Omega-3 Fatty Acid Nutritional Deficiency in Non-alcoholic Fatty Liver Disease and effects on Hepatic Steatosis (CONDIN)
Source: Preprints.org preprint supplement (doi:10.20944/preprints201807.0240.v1), 2018-07-13
Supplement: Supplementary file 18 [file VS.xlsx]

## Sheet: VS
VISIT	SBP	DBP	HR	HEIGHT	WEIGHT	HIP	WAIST	WHR	SUBJID	VISITNUM	BMI	B_SBP	D_SBP	B_DBP	D_DBP	B_HR	D_HR	B_WEIGHT	D_WEIGHT	B_BMI	D_BMI	B_WAIST	D_WAIST	B_HIP	D_HIP	B_WHR	D_WHR	C_WEIGHT	SITE	STATUS	AGE	SEX	FIRSTDT	RANDNO	TREAT	OMEGA	DIABETE	STATIN	OMEGA_C	SFFL	SAFETY	ITT	MITT	PP
Visit 1	139	78	62	62	188.4				02_001	Screening	34.5	128		74		56		188.2		34.5		47.5		44.5		1.07			02	Entered	57	Female	27OCT15	108	MF4637	<250 mg/day	Yes	Yes	<250 mg/day	No	Yes	Yes	Yes	Yes
Visit 2	128	74	56		188.2	44.5	47.5	1.07	02_001	Baseline	34.5	128		74		56		188.2		34.5		47.5		44.5		1.07			02	Entered	57	Female	27OCT15	108	MF4637	<250 mg/day	Yes	Yes	<250 mg/day	No	Yes	Yes	Yes	Yes
Visit 3	132	80	62		189.6	44.5	47.5	1.07	02_001	Week 6	34.7	128	4	74	6	56	6	188.2	1.4	34.5	0.2	47.5	0	44.5	0	1.07	0		02	Entered	57	Female	27OCT15	108	MF4637	<250 mg/day	Yes	Yes	<250 mg/day	No	Yes	Yes	Yes	Yes
Visit 4	136	82	75		189.8	44.5	47.5	1.07	02_001	Week 12	34.7	128	8	74	8	56	19	188.2	1.6	34.5	0.2	47.5	0	44.5	0	1.07	0		02	Entered	57	Female	27OCT15	108	MF4637	<250 mg/day	Yes	Yes	<250 mg/day	No	Yes	Yes	Yes	Yes
Visit 5	136	76	64		195.4	45	48	1.07	02_001	Week 24	35.8	128	8	74	2	56	8	188.2	7.2	34.5	1.3	47.5	0.5	44.5	0.5	1.07	0	Gaining Weight	02	Entered	57	Female	27OCT15	108	MF4637	<250 mg/day	Yes	Yes	<250 mg/day	No	Yes	Yes	Yes	Yes
Visit 1	124	82	75	70	258				02_002	Screening	37.1	128		80		74		263		37.8		47.8		44		1.09			02	Entered	41	Male	06NOV15	109	MF4637	<250 mg/day	No	Yes	>=250 mg/day	No	Yes	Yes	Yes	Yes
Visit 2	128	80	74		263	44	47.8	1.09	02_002	Baseline	37.8	128		80		74		263		37.8		47.8		44		1.09			02	Entered	41	Male	06NOV15	109	MF4637	<250 mg/day	No	Yes	>=250 mg/day	No	Yes	Yes	Yes	Yes
Visit 3	124	82	70		262	44	48	1.09	02_002	Week 6	37.6	128	-4	80	2	74	-4	263	-1	37.8	-0.2	47.8	0.2	44	0	1.09	0		02	Entered	41	Male	06NOV15	109	MF4637	<250 mg/day	No	Yes	>=250 mg/day	No	Yes	Yes	Yes	Yes
Visit 4	126	82	72		274	45	50	1.11	02_002	Week 12	39.3	128	-2	80	2	74	-2	263	11	37.8	1.5	47.8	2.2	44	1	1.09	0.02		02	Entered	41	Male	06NOV15	109	MF4637	<250 mg/day	No	Yes	>=250 mg/day	No	Yes	Yes	Yes	Yes
Visit 5	118	76	77		258.6	44.2	47.5	1.07	02_002	Week 24	37.1	128	-10	80	-4	74	3	263	-4.4	37.8	-0.7	47.8	-0.3	44	0.2	1.09	-0.02	Losing Weight (0-5%)	02	Entered	41	Male	06NOV15	109	MF4637	<250 mg/day	No	Yes	>=250 mg/day	No	Yes	Yes	Yes	Yes
Visit 1	136	84	62	71	216				02_003	Screening	30.2	138		82		75		216		30.2		44.5		42		1.06			02	Entered	58	Male	03NOV15	110	Placebo	>=250 mg/day	Yes	Yes	<250 mg/day	No	Yes	Yes	Yes	Yes
Visit 2	138	82	75		216	42	44.5	1.06	02_003	Baseline	30.2	138		82		75		216		30.2		44.5		42		1.06			02	Entered	58	Male	03NOV15	110	Placebo	>=250 mg/day	Yes	Yes	<250 mg/day	No	Yes	Yes	Yes	Yes
Visit 3	140	82	58		222	44.5	42.5	0.96	02_003	Week 6	31	138	2	82	0	75	-17	216	6	30.2	0.8	44.5	-2	42	2.5	1.06	-0.1		02	Entered	58	Male	03NOV15	110	Placebo	>=250 mg/day	Yes	Yes	<250 mg/day	No	Yes	Yes	Yes	Yes
Visit 4	136	82	62		222	44.5	43	0.97	02_003	Week 12	31	138	-2	82	0	75	-13	216	6	30.2	0.8	44.5	-1.5	42	2.5	1.06	-0.09		02	Entered	58	Male	03NOV15	110	Placebo	>=250 mg/day	Yes	Yes	<250 mg/day	No	Yes	Yes	Yes	Yes
Visit 5	142	82	60		222.5	44	43.5	0.99	02_003	Week 24	31.1	138	4	82	0	75	-15	216	6.5	30.2	0.9	44.5	-1	42	2	1.06	-0.07	Gaining Weight	02	Entered	58	Male	03NOV15	110	Placebo	>=250 mg/day	Yes	Yes	<250 mg/day	No	Yes	Yes	Yes	Yes
Visit 1	158	78	82	60	141				02_004	Screening	27.6	124		82		84		141.4		27.6		34		36		0.94			02	Early Termination	60	Female	12NOV15	111	Placebo	<250 mg/day	Yes	Yes	<250 mg/day	No	Yes	Yes	Yes	Yes
Visit 2	124	82	84		141.4	36	34	0.94	02_004	Baseline	27.6	124		82		84		141.4		27.6		34		36		0.94			02	Early Termination	60	Female	12NOV15	111	Placebo	<250 mg/day	Yes	Yes	<250 mg/day	No	Yes	Yes	Yes	Yes
Visit 3	120	82	76		141.6	36	34	0.94	02_004	Week 6	27.7	124	-4	82	0	84	-8	141.4	0.2	27.6	0.1	34	0	36	0	0.94	0		02	Early Termination	60	Female	12NOV15	111	Placebo	<250 mg/day	Yes	Yes	<250 mg/day	No	Yes	Yes	Yes	Yes
Visit 4	122	68	72		142	37	34	0.92	02_004	Week 12	27.8	124	-2	82	-14	84	-12	141.4	0.6	27.6	0.2	34	0	36	1	0.94	-0.02		02	Early Termination	60	Female	12NOV15	111	Placebo	<250 mg/day	Yes	Yes	<250 mg/day	No	Yes	Yes	Yes	Yes
Early Termination	122	80	78	63	143.4	37	34	0.92	02_004	Early Termination	25.4	124	-2	82	-2	84	-6	141.4	2	27.6	-2.2	34	0	36	1	0.94	-0.02		02	Early Termination	60	Female	12NOV15	111	Placebo	<250 mg/day	Yes	Yes	<250 mg/day	No	Yes	Yes	Yes	Yes
Visit 1	124	68	56	67	184				02_005	Screening	28.8	136		72		72		182.5		28.6		41.5		39.5		1.05			02	Entered	65	Male	04DEC15	112	Placebo	>=250 mg/day	No	No	>=250 mg/day	No	Yes	Yes	Yes	Yes
Visit 2	136	72	72		182.5	39.5	41.5	1.05	02_005	Baseline	28.6	136		72		72		182.5		28.6		41.5		39.5		1.05			02	Entered	65	Male	04DEC15	112	Placebo	>=250 mg/day	No	No	>=250 mg/day	No	Yes	Yes	Yes	Yes
Visit 3	130	68	73		182	39.5	41.5	1.05	02_005	Week 6	28.5	136	-6	72	-4	72	1	182.5	-0.5	28.6	-0.1	41.5	0	39.5	0	1.05	0		02	Entered	65	Male	04DEC15	112	Placebo	>=250 mg/day	No	No	>=250 mg/day	No	Yes	Yes	Yes	Yes
Visit 4	138	70	70		182	39.5	41.5	1.05	02_005	Week 12	28.5	136	2	72	-2	72	-2	182.5	-0.5	28.6	-0.1	41.5	0	39.5	0	1.05	0		02	Entered	65	Male	04DEC15	112	Placebo	>=250 mg/day	No	No	>=250 mg/day	No	Yes	Yes	Yes	Yes
Visit 5	138	74	74		180	39.5	41	1.04	02_005	Week 24	28.2	136	2	72	2	72	2	182.5	-2.5	28.6	-0.4	41.5	-0.5	39.5	0	1.05	-0.01	Losing Weight (0-5%)	02	Entered	65	Male	04DEC15	112	Placebo	>=250 mg/day	No	No	>=250 mg/day	No	Yes	Yes	Yes	Yes
Visit 1	122	78	92	64	190				02_006	Screening	32.6	122		78		92		190		32.6									02	Screen Failure	39	Female							<250 mg/day	Yes	No	No	No	No
Visit 1	140	90	76	71	232				03_001	Screening	32.4	132		100		76		232		32.4		42		40		1.05			03	Early Termination	53	Male	19NOV15	117	MF4637	<250 mg/day	No	No	>=250 mg/day	No	Yes	Yes	No	No
Visit 2	132	100	76		232	40	42	1.05	03_001	Baseline	32.4	132		100		76		232		32.4		42		40		1.05			03	Early Termination	53	Male	19NOV15	117	MF4637	<250 mg/day	No	No	>=250 mg/day	No	Yes	Yes	No	No
Visit 1	110	70	72	63	205				03_002	Screening	36.3	110		70		72		205		36.3		39		49		0.8			03	Early Termination	52	Female	30OCT15	116	Placebo	<250 mg/day	No	No	<250 mg/day	No	Yes	Yes	Yes	Yes
Visit 2	110	70	72		205	49	39	0.8	03_002	Baseline	36.3	110		70		72		205		36.3		39		49		0.8			03	Early Termination	52	Female	30OCT15	116	Placebo	<250 mg/day	No	No	<250 mg/day	No	Yes	Yes	Yes	Yes
Early Termination	122	70	80	63	212	48	40	0.83	03_002	Early Termination	37.6	110	12	70	0	72	8	205	7	36.3	1.3	39	1	49	-1	0.8	0.03		03	Early Termination	52	Female	30OCT15	116	Placebo	<250 mg/day	No	No	<250 mg/day	No	Yes	Yes	Yes	Yes
Visit 1	134	70	74	70	350				03_003	Screening	50.3	124		78		68		350		50.3		57.5		60		0.96			03	Entered	25	Male	24NOV15	121	MF4637	<250 mg/day	No	No	<250 mg/day	No	Yes	Yes	Yes	Yes
Visit 2	124	78	68		350	60	57.5	0.96	03_003	Baseline	50.3	124		78		68		350		50.3		57.5		60		0.96			03	Entered	25	Male	24NOV15	121	MF4637	<250 mg/day	No	No	<250 mg/day	No	Yes	Yes	Yes	Yes
Visit 3	118	76	72		362	63	56	0.89	03_003	Week 6	52	124	-6	78	-2	68	4	350	12	50.3	1.7	57.5	-1.5	60	3	0.96	-0.07		03	Entered	25	Male	24NOV15	121	MF4637	<250 mg/day	No	No	<250 mg/day	No	Yes	Yes	Yes	Yes
Visit 4	140	82	78		362	63	55	0.87	03_003	Week 12	52	124	16	78	4	68	10	350	12	50.3	1.7	57.5	-2.5	60	3	0.96	-0.09		03	Entered	25	Male	24NOV15	121	MF4637	<250 mg/day	No	No	<250 mg/day	No	Yes	Yes	Yes	Yes
Visit 5	142	80	96		350	62	52	0.84	03_003	Week 24	50.3	124	18	78	2	68	28	350	0	50.3	0	57.5	-5.5	60	2	0.96	-0.12	Losing Weight (0-5%)	03	Entered	25	Male	24NOV15	121	MF4637	<250 mg/day	No	No	<250 mg/day	No	Yes	Yes	Yes	Yes
Visit 1	144	100	76	65	228				03_004	Screening	38	144		90		76		227		37.8		42.5		53.5		0.79			03	Entered	56	Female	24NOV15	118	Placebo	<250 mg/day	No	No	>=250 mg/day	No	Yes	Yes	Yes	Yes
Visit 2	144	90	76		227	53.5	42.5	0.79	03_004	Baseline	37.8	144		90		76		227		37.8		42.5		53.5		0.79			03	Entered	56	Female	24NOV15	118	Placebo	<250 mg/day	No	No	>=250 mg/day	No	Yes	Yes	Yes	Yes
Visit 3	130	80	68		223	53	44	0.83	03_004	Week 6	37.1	144	-14	90	-10	76	-8	227	-4	37.8	-0.7	42.5	1.5	53.5	-0.5	0.79	0.04		03	Entered	56	Female	24NOV15	118	Placebo	<250 mg/day	No	No	>=250 mg/day	No	Yes	Yes	Yes	Yes
Visit 4	138	80	92		209	52	41	0.79	03_004	Week 12	34.8	144	-6	90	-10	76	16	227	-18	37.8	-3	42.5	-1.5	53.5	-1.5	0.79	0		03	Entered	56	Female	24NOV15	118	Placebo	<250 mg/day	No	No	>=250 mg/day	No	Yes	Yes	Yes	Yes
Visit 5	150	96	72		199	50	40	0.8	03_004	Week 24	33.1	144	6	90	6	76	-4	227	-28	37.8	-4.7	42.5	-2.5	53.5	-3.5	0.79	0.01	Losing Weight (>5%)	03	Entered	56	Female	24NOV15	118	Placebo	<250 mg/day	No	No	>=250 mg/day	No	Yes	Yes	Yes	Yes
Visit 1	154	96	70	68	234				03_005	Screening	35.6	120		80		90		235		35.8		43		47		0.91			03	Early Termination	49	Female	25NOV15	119	MF4637	>=250 mg/day	No	No	<250 mg/day	No	Yes	Yes	Yes	Yes
Visit 2	120	80	90		235	47	43	0.91	03_005	Baseline	35.8	120		80		90		235		35.8		43		47		0.91			03	Early Termination	49	Female	25NOV15	119	MF4637	>=250 mg/day	No	No	<250 mg/day	No	Yes	Yes	Yes	Yes
Visit 3	122	88	92		241	48	49	1.02	03_005	Week 6	36.7	120	2	80	8	90	2	235	6	35.8	0.9	43	6	47	1	0.91	0.11		03	Early Termination	49	Female	25NOV15	119	MF4637	>=250 mg/day	No	No	<250 mg/day	No	Yes	Yes	Yes	Yes
Visit 4	140	82	94		245	50.5	45	0.89	03_005	Week 12	37.3	120	20	80	2	90	4	235	10	35.8	1.5	43	2	47	3.5	0.91	-0.02		03	Early Termination	49	Female	25NOV15	119	MF4637	>=250 mg/day	No	No	<250 mg/day	No	Yes	Yes	Yes	Yes
Early Termination	122	78	88	68	239	51	44	0.86	03_005	Early Termination	36.4	120	2	80	-2	90	-2	235	4	35.8	0.6	43	1	47	4	0.91	-0.05		03	Early Termination	49	Female	25NOV15	119	MF4637	>=250 mg/day	No	No	<250 mg/day	No	Yes	Yes	Yes	Yes
Visit 1	140	94	88	68	258				03_006	Screening	39.3	140		94		88		258		39.3									03	Screen Failure	51	Male							<250 mg/day	Yes	No	No	No	No
Visit 1	132	90	84	69	260				03_007	Screening	38.4	138		92		86		261		38.6		45		47		0.96			03	Entered	40	Male	19NOV15	120	Placebo	<250 mg/day	No	No	<250 mg/day	No	Yes	Yes	Yes	No
Visit 2	138	92	86		261	47	45	0.96	03_007	Baseline	38.6	138		92		86		261		38.6		45		47		0.96			03	Entered	40	Male	19NOV15	120	Placebo	<250 mg/day	No	No	<250 mg/day	No	Yes	Yes	Yes	No
Visit 3	128	86	68		270	46	47	1.02	03_007	Week 6	39.9	138	-10	92	-6	86	-18	261	9	38.6	1.3	45	2	47	-1	0.96	0.06		03	Entered	40	Male	19NOV15	120	Placebo	<250 mg/day	No	No	<250 mg/day	No	Yes	Yes	Yes	No
Visit 4	128	88	76		266	44	47	1.07	03_007	Week 12	39.3	138	-10	92	-4	86	-10	261	5	38.6	0.7	45	2	47	-3	0.96	0.11		03	Entered	40	Male	19NOV15	120	Placebo	<250 mg/day	No	No	<250 mg/day	No	Yes	Yes	Yes	No
Visit 5	124	80	82		276	46	49	1.07	03_007	Week 24	40.8	138	-14	92	-12	86	-4	261	15	38.6	2.2	45	4	47	-1	0.96	0.11	Gaining Weight	03	Entered	40	Male	19NOV15	120	Placebo	<250 mg/day	No	No	<250 mg/day	No	Yes	Yes	Yes	No
Visit 1	146	80	84	71	235				03_008	Screening	32.8	146		80		84		235		32.8									03	Screen Failure	46	Male							>=250 mg/day	Yes	No	No	No	No
Visit 1	122	78	96	71	252				03_009	Screening	35.2	114		80		78		242		33.8		43		42		1.02			03	Entered	40	Male	13JAN16	122	MF4637	<250 mg/day	No	No	>=250 mg/day	No	Yes	Yes	Yes	Yes
Visit 2	114	80	78		242	42	43	1.02	03_009	Baseline	33.8	114		80		78		242		33.8		43		42		1.02			03	Entered	40	Male	13JAN16	122	MF4637	<250 mg/day	No	No	>=250 mg/day	No	Yes	Yes	Yes	Yes
Visit 3	162	110	96		244	44	43	0.98	03_009	Week 6	34.1	114	48	80	30	78	18	242	2	33.8	0.3	43	0	42	2	1.02	-0.04		03	Entered	40	Male	13JAN16	122	MF4637	<250 mg/day	No	No	>=250 mg/day	No	Yes	Yes	Yes	Yes
Visit 4	126	84	72		241	43	41	0.95	03_009	Week 12	33.6	114	12	80	4	78	-6	242	-1	33.8	-0.2	43	-2	42	1	1.02	-0.07		03	Entered	40	Male	13JAN16	122	MF4637	<250 mg/day	No	No	>=250 mg/day	No	Yes	Yes	Yes	Yes
Visit 5	130	80	82		244	43	44	1.02	03_009	Week 24	34.1	114	16	80	0	78	4	242	2	33.8	0.3	43	1	42	1	1.02	0	Gaining Weight	03	Entered	40	Male	13JAN16	122	MF4637	<250 mg/day	No	No	>=250 mg/day	No	Yes	Yes	Yes	Yes
Visit 1	126	86	96	72	241				03_010	Screening	32.7	122		82		82		240		32.6		45.5		46		0.99			03	Entered	41	Male	12JAN16	123	Placebo	>=250 mg/day	No	No	>=250 mg/day	No	Yes	Yes	Yes	Yes
Visit 2	122	82	82		240	46	45.5	0.99	03_010	Baseline	32.6	122		82		82		240		32.6		45.5		46		0.99			03	Entered	41	Male	12JAN16	123	Placebo	>=250 mg/day	No	No	>=250 mg/day	No	Yes	Yes	Yes	Yes
Visit 3	124	90	90		248	44	44	1	03_010	Week 6	33.7	122	2	82	8	82	8	240	8	32.6	1.1	45.5	-1.5	46	-2	0.99	0.01		03	Entered	41	Male	12JAN16	123	Placebo	>=250 mg/day	No	No	>=250 mg/day	No	Yes	Yes	Yes	Yes
Visit 4	122	78	68		250	47	45	0.96	03_010	Week 12	33.9	122	0	82	-4	82	-14	240	10	32.6	1.3	45.5	-0.5	46	1	0.99	-0.03		03	Entered	41	Male	12JAN16	123	Placebo	>=250 mg/day	No	No	>=250 mg/day	No	Yes	Yes	Yes	Yes
Visit 5	114	72	66		246	44	45.5	1.03	03_010	Week 24	33.4	122	-8	82	-10	82	-16	240	6	32.6	0.8	45.5	0	46	-2	0.99	0.04	Gaining Weight	03	Entered	41	Male	12JAN16	123	Placebo	>=250 mg/day	No	No	>=250 mg/day	No	Yes	Yes	Yes	Yes
Visit 1	130	88	84	70	221				03_011	Screening	31.7	136		90		76		221		31.7		43		41		1.05			03	Entered	55	Male	11FEB16	188	MF4637	<250 mg/day	No	Yes	<250 mg/day	No	Yes	Yes	Yes	Yes
Visit 2	136	90	76		221	41	43	1.05	03_011	Baseline	31.7	136		90		76		221		31.7		43		41		1.05			03	Entered	55	Male	11FEB16	188	MF4637	<250 mg/day	No	Yes	<250 mg/day	No	Yes	Yes	Yes	Yes
Visit 3	142	80	98		224	43	43	1	03_011	Week 6	32.2	136	6	90	-10	76	22	221	3	31.7	0.5	43	0	41	2	1.05	-0.05		03	Entered	55	Male	11FEB16	188	MF4637	<250 mg/day	No	Yes	<250 mg/day	No	Yes	Yes	Yes	Yes
Visit 4	132	80	84		224	43	43	1	03_011	Week 12	32.2	136	-4	90	-10	76	8	221	3	31.7	0.5	43	0	41	2	1.05	-0.05		03	Entered	55	Male	11FEB16	188	MF4637	<250 mg/day	No	Yes	<250 mg/day	No	Yes	Yes	Yes	Yes
Visit 5	142	82	80		224	40	41	1.02	03_011	Week 24	32.2	136	6	90	-8	76	4	221	3	31.7	0.5	43	-2	41	-1	1.05	-0.03	Gaining Weight	03	Entered	55	Male	11FEB16	188	MF4637	<250 mg/day	No	Yes	<250 mg/day	No	Yes	Yes	Yes	Yes
Visit 1	132	84	64	64	221				03_012	Screening	38	122		80		67		217		37.3		43		46		0.93			03	Entered	63	Male	12FEB16	190	MF4637	<250 mg/day	No	Yes	<250 mg/day	No	Yes	Yes	Yes	Yes
Visit 2	122	80	67		217	46	43	0.93	03_012	Baseline	37.3	122		80		67		217		37.3		43		46		0.93			03	Entered	63	Male	12FEB16	190	MF4637	<250 mg/day	No	Yes	<250 mg/day	No	Yes	Yes	Yes	Yes
Visit 3	122	78	65		210	43	41	0.95	03_012	Week 6	36.1	122	0	80	-2	67	-2	217	-7	37.3	-1.2	43	-2	46	-3	0.93	0.02		03	Entered	63	Male	12FEB16	190	MF4637	<250 mg/day	No	Yes	<250 mg/day	No	Yes	Yes	Yes	Yes
Visit 4	124	78	82		217	46	45	0.98	03_012	Week 12	37.3	122	2	80	-2	67	15	217	0	37.3	0	43	2	46	0	0.93	0.05		03	Entered	63	Male	12FEB16	190	MF4637	<250 mg/day	No	Yes	<250 mg/day	No	Yes	Yes	Yes	Yes
Visit 5	118	84	68		216	43	43	1	03_012	Week 24	37.1	122	-4	80	4	67	1	217	-1	37.3	-0.2	43	0	46	-3	0.93	0.07	Losing Weight (0-5%)	03	Entered	63	Male	12FEB16	190	MF4637	<250 mg/day	No	Yes	<250 mg/day	No	Yes	Yes	Yes	Yes
Visit 1	126	84	78	65	247				03_013	Screening	41.1	142		92		88		242		40.3		44		52		0.85			03	Entered	61	Female	11FEB16	189	Placebo	<250 mg/day	No	Yes	<250 mg/day	No	Yes	Yes	Yes	Yes
Visit 2	142	92	88		242	52	44	0.85	03_013	Baseline	40.3	142		92		88		242		40.3		44		52		0.85			03	Entered	61	Female	11FEB16	189	Placebo	<250 mg/day	No	Yes	<250 mg/day	No	Yes	Yes	Yes	Yes
Visit 3	142	80	76		245	50	44	0.88	03_013	Week 6	40.8	142	0	92	-12	88	-12	242	3	40.3	0.5	44	0	52	-2	0.85	0.03		03	Entered	61	Female	11FEB16	189	Placebo	<250 mg/day	No	Yes	<250 mg/day	No	Yes	Yes	Yes	Yes
Visit 4	122	80	72		244	50	44	0.88	03_013	Week 12	40.6	142	-20	92	-12	88	-16	242	2	40.3	0.3	44	0	52	-2	0.85	0.03		03	Entered	61	Female	11FEB16	189	Placebo	<250 mg/day	No	Yes	<250 mg/day	No	Yes	Yes	Yes	Yes
Visit 5	130	80	82		244	52	45	0.87	03_013	Week 24	40.6	142	-12	92	-12	88	-6	242	2	40.3	0.3	44	1	52	0	0.85	0.02	Gaining Weight	03	Entered	61	Female	11FEB16	189	Placebo	<250 mg/day	No	Yes	<250 mg/day	No	Yes	Yes	Yes	Yes
Visit 1	135	88	89	60	168				04_001	Screening	32.8	136		88		87		168		32.8		40		41		0.98			04	Entered	49	Female	13OCT15	124	Placebo	>=250 mg/day	Yes	No	>=250 mg/day	No	Yes	Yes	Yes	Yes
Visit 2	136	88	87		168	41	40	0.98	04_001	Baseline	32.8	136		88		87		168		32.8		40		41		0.98			04	Entered	49	Female	13OCT15	124	Placebo	>=250 mg/day	Yes	No	>=250 mg/day	No	Yes	Yes	Yes	Yes
Visit 3	127	84	81		168	40	36	0.9	04_001	Week 6	32.8	136	-9	88	-4	87	-6	168	0	32.8	0	40	-4	41	-1	0.98	-0.08		04	Entered	49	Female	13OCT15	124	Placebo	>=250 mg/day	Yes	No	>=250 mg/day	No	Yes	Yes	Yes	Yes
Visit 4	143	84	88		166	39	35	0.9	04_001	Week 12	32.4	136	7	88	-4	87	1	168	-2	32.8	-0.4	40	-5	41	-2	0.98	-0.08		04	Entered	49	Female	13OCT15	124	Placebo	>=250 mg/day	Yes	No	>=250 mg/day	No	Yes	Yes	Yes	Yes
Visit 5	134	91	81		166	40	36	0.9	04_001	Week 24	32.4	136	-2	88	3	87	-6	168	-2	32.8	-0.4	40	-4	41	-1	0.98	-0.08	Losing Weight (0-5%)	04	Entered	49	Female	13OCT15	124	Placebo	>=250 mg/day	Yes	No	>=250 mg/day	No	Yes	Yes	Yes	Yes
Visit 1	116	64	52	65	182				04_002	Screening	30.3	116		64		52		182		30.3									04	Screen Failure	56	Male							<250 mg/day	Yes	No	No	No	No
Visit 1	129	95	68	66	192				04_003	Screening	31	129		95		68		192		31									04	Screen Failure	35	Female							<250 mg/day	Yes	No	No	No	No
Visit 1	145	88	84	69	180				04_004	Screening	26.6	148		83		84		176		26		36		41		0.88			04	Entered	34	Male	15OCT15	125	MF4637	<250 mg/day	No	No	<250 mg/day	No	Yes	Yes	Yes	No
Visit 2	148	83	84		176	41	36	0.88	04_004	Baseline	26	148		83		84		176		26		36		41		0.88			04	Entered	34	Male	15OCT15	125	MF4637	<250 mg/day	No	No	<250 mg/day	No	Yes	Yes	Yes	No
Visit 3	143	80	81		174	40	36	0.9	04_004	Week 6	25.7	148	-5	83	-3	84	-3	176	-2	26	-0.3	36	0	41	-1	0.88	0.02		04	Entered	34	Male	15OCT15	125	MF4637	<250 mg/day	No	No	<250 mg/day	No	Yes	Yes	Yes	No
Visit 4	121	81	88		177	40	35	0.88	04_004	Week 12	26.2	148	-27	83	-2	84	4	176	1	26	0.2	36	-1	41	-1	0.88	0		04	Entered	34	Male	15OCT15	125	MF4637	<250 mg/day	No	No	<250 mg/day	No	Yes	Yes	Yes	No
Visit 5	132	90	73		181	41	38.5	0.94	04_004	Week 24	26.8	148	-16	83	7	84	-11	176	5	26	0.8	36	2.5	41	0	0.88	0.06	Gaining Weight	04	Entered	34	Male	15OCT15	125	MF4637	<250 mg/day	No	No	<250 mg/day	No	Yes	Yes	Yes	No
Visit 1	122	87	62	61	160				04_005	Screening	30.3	122		87		62		160		30.3									04	Screen Failure	40	Female							<250 mg/day	Yes	No	No	No	No
Visit 1	128	86	82	63	198				04_006	Screening	35.1	128		86		82		198		35.1									04	Screen Failure	54	Female							>=250 mg/day	Yes	No	No	No	No
Visit 1	124	86	74	64	138				04_007	Screening	23.7	124		86		74		138		23.7									04	Screen Failure	59	Female							>=250 mg/day	Yes	No	No	No	No
Visit 1	122	79	89	61	148				04_008	Screening	28	122		79		89		148		28									04	Screen Failure	25	Female							>=250 mg/day	Yes	No	No	No	No
Visit 1	117	95	72	63	212				04_009	Screening	37.6	143		83		74		212		37.6		40		49		0.82			04	Entered	53	Female	04JAN16	127	Placebo	<250 mg/day	No	No	<250 mg/day	No	Yes	Yes	Yes	Yes
Visit 2	143	83	74		212	49	40	0.82	04_009	Baseline	37.6	143		83		74		212		37.6		40		49		0.82			04	Entered	53	Female	04JAN16	127	Placebo	<250 mg/day	No	No	<250 mg/day	No	Yes	Yes	Yes	Yes
Visit 3	116	98	74		209	48.5	38.5	0.79	04_009	Week 6	37.1	143	-27	83	15	74	0	212	-3	37.6	-0.5	40	-1.5	49	-0.5	0.82	-0.03		04	Entered	53	Female	04JAN16	127	Placebo	<250 mg/day	No	No	<250 mg/day	No	Yes	Yes	Yes	Yes
Visit 4	113	89	75		210	49	39.5	0.81	04_009	Week 12	37.2	143	-30	83	6	74	1	212	-2	37.6	-0.4	40	-0.5	49	0	0.82	-0.01		04	Entered	53	Female	04JAN16	127	Placebo	<250 mg/day	No	No	<250 mg/day	No	Yes	Yes	Yes	Yes
Visit 5	138	87	72		216	49.5	40	0.81	04_009	Week 24	38.3	143	-5	83	4	74	-2	212	4	37.6	0.7	40	0	49	0.5	0.82	-0.01	Gaining Weight	04	Entered	53	Female	04JAN16	127	Placebo	<250 mg/day	No	No	<250 mg/day	No	Yes	Yes	Yes	Yes
Visit 1	106	68	60	61	144				04_010	Screening	27.2	113		75		80		148		28		31		41		0.76			04	Entered	25	Female	05JAN16	126	MF4637	>=250 mg/day	No	No	>=250 mg/day	No	Yes	Yes	Yes	Yes
Visit 2	113	75	80		148	41	31	0.76	04_010	Baseline	28	113		75		80		148		28		31		41		0.76			04	Entered	25	Female	05JAN16	126	MF4637	>=250 mg/day	No	No	>=250 mg/day	No	Yes	Yes	Yes	Yes
Visit 3	100	68	80		150	42	32.5	0.77	04_010	Week 6	28.4	113	-13	75	-7	80	0	148	2	28	0.4	31	1.5	41	1	0.76	0.01		04	Entered	25	Female	05JAN16	126	MF4637	>=250 mg/day	No	No	>=250 mg/day	No	Yes	Yes	Yes	Yes
Visit 4	110	87	63		153.5	42.5	31	0.73	04_010	Week 12	29	113	-3	75	12	80	-17	148	5.5	28	1	31	0	41	1.5	0.76	-0.03		04	Entered	25	Female	05JAN16	126	MF4637	>=250 mg/day	No	No	>=250 mg/day	No	Yes	Yes	Yes	Yes
Visit 5	113	73	83		160	38	33.5	0.88	04_010	Week 24	30.3	113	0	75	-2	80	3	148	12	28	2.3	31	2.5	41	-3	0.76	0.12	Gaining Weight	04	Entered	25	Female	05JAN16	126	MF4637	>=250 mg/day	No	No	>=250 mg/day	No	Yes	Yes	Yes	Yes
Visit 1	145	87	84	68	189				04_011	Screening	28.8	138		87		69		194		29.5		41		40		1.02			04	Entered	41	Male	26JAN16	129	Placebo	>=250 mg/day	No	No	>=250 mg/day	No	Yes	Yes	Yes	Yes
Visit 2	138	87	69		194	40	41	1.02	04_011	Baseline	29.5	138		87		69		194		29.5		41		40		1.02			04	Entered	41	Male	26JAN16	129	Placebo	>=250 mg/day	No	No	>=250 mg/day	No	Yes	Yes	Yes	Yes
Visit 3	138	90	78		191	41	40.5	0.99	04_011	Week 6	29.1	138	0	87	3	69	9	194	-3	29.5	-0.4	41	-0.5	40	1	1.02	-0.03		04	Entered	41	Male	26JAN16	129	Placebo	>=250 mg/day	No	No	>=250 mg/day	No	Yes	Yes	Yes	Yes
Visit 4	128	87	78		192	41	41	1	04_011	Week 12	29.2	138	-10	87	0	69	9	194	-2	29.5	-0.3	41	0	40	1	1.02	-0.02		04	Entered	41	Male	26JAN16	129	Placebo	>=250 mg/day	No	No	>=250 mg/day	No	Yes	Yes	Yes	Yes
Visit 5	134	92	62		192	39.5	40	1.01	04_011	Week 24	29.2	138	-4	87	5	69	-7	194	-2	29.5	-0.3	41	-1	40	-0.5	1.02	-0.01	Losing Weight (0-5%)	04	Entered	41	Male	26JAN16	129	Placebo	>=250 mg/day	No	No	>=250 mg/day	No	Yes	Yes	Yes	Yes
Visit 1	144	89	86	64	224				04_012	Screening	38.5	127		82		87		225		38.7		47		47		1			04	Entered	19	Male	19JAN16	128	Placebo	<250 mg/day	No	No	<250 mg/day	No	Yes	Yes	Yes	Yes
Visit 2	127	82	87		225	47	47	1	04_012	Baseline	38.7	127		82		87		225		38.7		47		47		1			04	Entered	19	Male	19JAN16	128	Placebo	<250 mg/day	No	No	<250 mg/day	No	Yes	Yes	Yes	Yes
Visit 3	136	91	94		222	47	46	0.98	04_012	Week 6	38.1	127	9	82	9	87	7	225	-3	38.7	-0.6	47	-1	47	0	1	-0.02		04	Entered	19	Male	19JAN16	128	Placebo	<250 mg/day	No	No	<250 mg/day	No	Yes	Yes	Yes	Yes
Visit 4	136	91	84		221	41	42	1.02	04_012	Week 12	38	127	9	82	9	87	-3	225	-4	38.7	-0.7	47	-5	47	-6	1	0.02		04	Entered	19	Male	19JAN16	128	Placebo	<250 mg/day	No	No	<250 mg/day	No	Yes	Yes	Yes	Yes
Visit 5	147	95	71		216	45	44.5	0.99	04_012	Week 24	37.1	127	20	82	13	87	-16	225	-9	38.7	-1.6	47	-2.5	47	-2	1	-0.01	Losing Weight (0-5%)	04	Entered	19	Male	19JAN16	128	Placebo	<250 mg/day	No	No	<250 mg/day	No	Yes	Yes	Yes	Yes
Visit 1	127	86	78	62	205				04_013	Screening	37.5	132		87		76		205		37.5		43		48.5		0.89			04	Entered	64	Female	15FEB16	130	MF4637	<250 mg/day	No	Yes	<250 mg/day	No	Yes	Yes	Yes	Yes
Visit 2	132	87	76		205	48.5	43	0.89	04_013	Baseline	37.5	132		87		76		205		37.5		43		48.5		0.89			04	Entered	64	Female	15FEB16	130	MF4637	<250 mg/day	No	Yes	<250 mg/day	No	Yes	Yes	Yes	Yes
Visit 3	118	78	73		205	49	43	0.88	04_013	Week 6	37.5	132	-14	87	-9	76	-3	205	0	37.5	0	43	0	48.5	0.5	0.89	-0.01		04	Entered	64	Female	15FEB16	130	MF4637	<250 mg/day	No	Yes	<250 mg/day	No	Yes	Yes	Yes	Yes
Visit 4	109	77	86		205	49	42	0.86	04_013	Week 12	37.5	132	-23	87	-10	76	10	205	0	37.5	0	43	-1	48.5	0.5	0.89	-0.03		04	Entered	64	Female	15FEB16	130	MF4637	<250 mg/day	No	Yes	<250 mg/day	No	Yes	Yes	Yes	Yes
Visit 5	122	83	76		203	49	44.5	0.91	04_013	Week 24	37.2	132	-10	87	-4	76	0	205	-2	37.5	-0.3	43	1.5	48.5	0.5	0.89	0.02	Losing Weight (0-5%)	04	Entered	64	Female	15FEB16	130	MF4637	<250 mg/day	No	Yes	<250 mg/day	No	Yes	Yes	Yes	Yes
Visit 1	107	83	90	63	156				04_014	Screening	27.7	111		77		86		154		27.3		40		40		1			04	Entered	35	Female	25FEB16	131	MF4637	>=250 mg/day	No	No	>=250 mg/day	No	Yes	Yes	Yes	Yes
Visit 2	111	77	86		154	40	40	1	04_014	Baseline	27.3	111		77		86		154		27.3		40		40		1			04	Entered	35	Female	25FEB16	131	MF4637	>=250 mg/day	No	No	>=250 mg/day	No	Yes	Yes	Yes	Yes
Visit 3	103	75	82		151	39	38	0.97	04_014	Week 6	26.8	111	-8	77	-2	86	-4	154	-3	27.3	-0.5	40	-2	40	-1	1	-0.03		04	Entered	35	Female	25FEB16	131	MF4637	>=250 mg/day	No	No	>=250 mg/day	No	Yes	Yes	Yes	Yes
Visit 4	104	78	85		150	39	38	0.97	04_014	Week 12	26.6	111	-7	77	1	86	-1	154	-4	27.3	-0.7	40	-2	40	-1	1	-0.03		04	Entered	35	Female	25FEB16	131	MF4637	>=250 mg/day	No	No	>=250 mg/day	No	Yes	Yes	Yes	Yes
Visit 5	124	89	79		151	40	37	0.92	04_014	Week 24	26.8	111	13	77	12	86	-7	154	-3	27.3	-0.5	40	-3	40	0	1	-0.08	Losing Weight (0-5%)	04	Entered	35	Female	25FEB16	131	MF4637	>=250 mg/day	No	No	>=250 mg/day	No	Yes	Yes	Yes	Yes
Visit 1	133	97	67	67	193				04_015	Screening	30.3	134		92		76		194		30.4		41		40		1.02			04	Entered	50	Male	21MAR16	198	Placebo	<250 mg/day	No	Yes	<250 mg/day	No	Yes	Yes	Yes	No
Visit 2	134	92	76		194	40	41	1.02	04_015	Baseline	30.4	134		92		76		194		30.4		41		40		1.02			04	Entered	50	Male	21MAR16	198	Placebo	<250 mg/day	No	Yes	<250 mg/day	No	Yes	Yes	Yes	No
Visit 3	150	105	68		191	42	43	1.02	04_015	Week 6	29.9	134	16	92	13	76	-8	194	-3	30.4	-0.5	41	2	40	2	1.02	0		04	Entered	50	Male	21MAR16	198	Placebo	<250 mg/day	No	Yes	<250 mg/day	No	Yes	Yes	Yes	No
Visit 4	140	90	66		194	39	42.5	1.09	04_015	Week 12	30.4	134	6	92	-2	76	-10	194	0	30.4	0	41	1.5	40	-1	1.02	0.07		04	Entered	50	Male	21MAR16	198	Placebo	<250 mg/day	No	Yes	<250 mg/day	No	Yes	Yes	Yes	No
Visit 5	128	86	61		198.5	41	42	1.02	04_015	Week 24	31.1	134	-6	92	-6	76	-15	194	4.5	30.4	0.7	41	1	40	1	1.02	0	Gaining Weight	04	Entered	50	Male	21MAR16	198	Placebo	<250 mg/day	No	Yes	<250 mg/day	No	Yes	Yes	Yes	No
Visit 1	134	93	67	70	223				04_018	Screening	32	133		93		65		222		31.9		41		42		0.98			04	Early Termination	37	Male		197	MF4637	<250 mg/day	No	No	<250 mg/day	No	No	Yes	No	No
Visit 2	133	93	65		222	42	41	0.98	04_018	Baseline	31.9	133		93		65		222		31.9		41		42		0.98			04	Early Termination	37	Male		197	MF4637	<250 mg/day	No	No	<250 mg/day	No	No	Yes	No	No
Visit 1	113	70	90	65	168				04_019	Screening	28	115		73		89		169		28.1		38.5		41		0.94			04	Early Termination	50	Female		200	Placebo	<250 mg/day	No	No	<250 mg/day	No	No	Yes	No	No
Visit 2	115	73	89		169	41	38.5	0.94	04_019	Baseline	28.1	115		73		89		169		28.1		38.5		41		0.94			04	Early Termination	50	Female		200	Placebo	<250 mg/day	No	No	<250 mg/day	No	No	Yes	No	No
Visit 1	122	85	83	71	230				04_020	Screening	32.1	131		100		80		235		32.8		40		40		1			04	Entered	44	Male	28JUL16	196	MF4637	<250 mg/day	Yes	No	<250 mg/day	No	Yes	Yes	Yes	Yes
Visit 2	131	100	80		235	40	40	1	04_020	Baseline	32.8	131		100		80		235		32.8		40		40		1			04	Entered	44	Male	28JUL16	196	MF4637	<250 mg/day	Yes	No	<250 mg/day	No	Yes	Yes	Yes	Yes
Visit 3	123	89	83		240	43	45	1.05	04_020	Week 6	33.5	131	-8	100	-11	80	3	235	5	32.8	0.7	40	5	40	3	1	0.05		04	Entered	44	Male	28JUL16	196	MF4637	<250 mg/day	Yes	No	<250 mg/day	No	Yes	Yes	Yes	Yes
Visit 4	131	88	92		238	44	45	1.02	04_020	Week 12	33.2	131	0	100	-12	80	12	235	3	32.8	0.4	40	5	40	4	1	0.02		04	Entered	44	Male	28JUL16	196	MF4637	<250 mg/day	Yes	No	<250 mg/day	No	Yes	Yes	Yes	Yes
Visit 5	131	90	89		236	43	45	1.05	04_020	Week 24	32.9	131	0	100	-10	80	9	235	1	32.8	0.1	40	5	40	3	1	0.05	Gaining Weight	04	Entered	44	Male	28JUL16	196	MF4637	<250 mg/day	Yes	No	<250 mg/day	No	Yes	Yes	Yes	Yes
Visit 1	132	99	96	79	354				04_021	Screening	39.9	132		99		96		354		39.9									04	Screen Failure	50	Male							<250 mg/day	Yes	No	No	No	No
Visit 1	126	85	61	64	206				04_022	Screening	35.4	125		77		64		207		35.6		47		41		1.15			04	Entered	44	Female	28JUL16	199	Placebo	>=250 mg/day	No	No	>=250 mg/day	No	Yes	Yes	Yes	Yes
Visit 2	125	77	64		207	41	47	1.15	04_022	Baseline	35.6	125		77		64		207		35.6		47		41		1.15			04	Entered	44	Female	28JUL16	199	Placebo	>=250 mg/day	No	No	>=250 mg/day	No	Yes	Yes	Yes	Yes
Visit 3	127	84	84		209	44	46	1.05	04_022	Week 6	35.9	125	2	77	7	64	20	207	2	35.6	0.3	47	-1	41	3	1.15	-0.1		04	Entered	44	Female	28JUL16	199	Placebo	>=250 mg/day	No	No	>=250 mg/day	No	Yes	Yes	Yes	Yes
Visit 4	111	75	65		210	47	42	0.89	04_022	Week 12	36.1	125	-14	77	-2	64	1	207	3	35.6	0.5	47	-5	41	6	1.15	-0.26		04	Entered	44	Female	28JUL16	199	Placebo	>=250 mg/day	No	No	>=250 mg/day	No	Yes	Yes	Yes	Yes
Visit 5	107	74	65		215.5	46	42.5	0.92	04_022	Week 24	37	125	-18	77	-3	64	1	207	8.5	35.6	1.4	47	-4.5	41	5	1.15	-0.23	Gaining Weight	04	Entered	44	Female	28JUL16	199	Placebo	>=250 mg/day	No	No	>=250 mg/day	No	Yes	Yes	Yes	Yes
Visit 1	135	87	78	66	234				04_023	Screening	37.8	150		87		87		235		38		43		43		1			04	Entered	56	Male	17AUG16	202	MF4637	>=250 mg/day	No	No	>=250 mg/day	No	Yes	Yes	Yes	Yes
Visit 2	150	87	87		235	43	43	1	04_023	Baseline	38	150		87		87		235		38		43		43		1			04	Entered	56	Male	17AUG16	202	MF4637	>=250 mg/day	No	No	>=250 mg/day	No	Yes	Yes	Yes	Yes
Visit 3	143	75	88		234	43	44	1.02	04_023	Week 6	37.8	150	-7	87	-12	87	1	235	-1	38	-0.2	43	1	43	0	1	0.02		04	Entered	56	Male	17AUG16	202	MF4637	>=250 mg/day	No	No	>=250 mg/day	No	Yes	Yes	Yes	Yes
Visit 4	131	79	86		245.6	44	45	1.02	04_023	Week 12	39.7	150	-19	87	-8	87	-1	235	10.6	38	1.7	43	2	43	1	1	0.02		04	Entered	56	Male	17AUG16	202	MF4637	>=250 mg/day	No	No	>=250 mg/day	No	Yes	Yes	Yes	Yes
Visit 5	127	70	85		238.5	44	41	0.93	04_023	Week 24	38.5	150	-23	87	-17	87	-2	235	3.5	38	0.5	43	-2	43	1	1	-0.07	Gaining Weight	04	Entered	56	Male	17AUG16	202	MF4637	>=250 mg/day	No	No	>=250 mg/day	No	Yes	Yes	Yes	Yes
Visit 1	148	91	71	61	187				04_024	Screening	35.4	148		91		71		187		35.4									04	Screen Failure	55	Female							<250 mg/day	Yes	No	No	No	No
Visit 1	133	94	75	70	212				04_025	Screening	30.4	132		83		73		213		30.6		42.5		41.3		1.03			04	Entered	49	Male	25AUG16	203	MF4637	<250 mg/day	No	No	<250 mg/day	No	Yes	Yes	Yes	Yes
Visit 2	132	83	73		213	41.3	42.5	1.03	04_025	Baseline	30.6	132		83		73		213		30.6		42.5		41.3		1.03			04	Entered	49	Male	25AUG16	203	MF4637	<250 mg/day	No	No	<250 mg/day	No	Yes	Yes	Yes	Yes
Visit 3	131	88	82		210.5	41	40	0.98	04_025	Week 6	30.2	132	-1	83	5	73	9	213	-2.5	30.6	-0.4	42.5	-2.5	41.3	-0.3	1.03	-0.05		04	Entered	49	Male	25AUG16	203	MF4637	<250 mg/day	No	No	<250 mg/day	No	Yes	Yes	Yes	Yes
Visit 4	134	98	66		216.5	42	40.5	0.96	04_025	Week 12	31.1	132	2	83	15	73	-7	213	3.5	30.6	0.5	42.5	-2	41.3	0.7	1.03	-0.07		04	Entered	49	Male	25AUG16	203	MF4637	<250 mg/day	No	No	<250 mg/day	No	Yes	Yes	Yes	Yes
Visit 5	132	90	70		214	41	40	0.98	04_025	Week 24	30.7	132	0	83	7	73	-3	213	1	30.6	0.1	42.5	-2.5	41.3	-0.3	1.03	-0.05	Gaining Weight	04	Entered	49	Male	25AUG16	203	MF4637	<250 mg/day	No	No	<250 mg/day	No	Yes	Yes	Yes	Yes
Visit 1	129	86	66	66	216				04_026	Screening	34.9	129		86		66		216		34.9									04	Screen Failure	36	Male							>=250 mg/day	Yes	No	No	No	No
Visit 1	120	91	76	64	180				04_027	Screening	30.9	119		88		79		177		30.4		35		44		0.8			04	Early Termination	39	Female		201	Placebo	>=250 mg/day	No	No	>=250 mg/day	No	No	Yes	No	No
Visit 2	119	88	79		177	44	35	0.8	04_027	Baseline	30.4	119		88		79		177		30.4		35		44		0.8			04	Early Termination	39	Female		201	Placebo	>=250 mg/day	No	No	>=250 mg/day	No	No	Yes	No	No
Early Termination	116	87	86	64	178	44.5	38.5	0.87	04_027	Early Termination	30.6	119	-3	88	-1	79	7	177	1	30.4	0.2	35	3.5	44	0.5	0.8	0.07		04	Early Termination	39	Female		201	Placebo	>=250 mg/day	No	No	>=250 mg/day	No	No	Yes	No	No
Visit 1	122	78	52	61	169				04_030	Screening	32	145		70		52		169		32		46		49		0.94			04	Entered	67	Female	15SEP16	216	MF4637	>=250 mg/day	Yes	No	>=250 mg/day	No	Yes	Yes	Yes	Yes
Visit 2	145	70	52		169	49	46	0.94	04_030	Baseline	32	145		70		52		169		32		46		49		0.94			04	Entered	67	Female	15SEP16	216	MF4637	>=250 mg/day	Yes	No	>=250 mg/day	No	Yes	Yes	Yes	Yes
Visit 3	134	81	94		173	46	42	0.91	04_030	Week 6	32.7	145	-11	70	11	52	42	169	4	32	0.7	46	-4	49	-3	0.94	-0.03		04	Entered	67	Female	15SEP16	216	MF4637	>=250 mg/day	Yes	No	>=250 mg/day	No	Yes	Yes	Yes	Yes
Visit 4	143	87	58		174	46	42	0.91	04_030	Week 12	32.9	145	-2	70	17	52	6	169	5	32	0.9	46	-4	49	-3	0.94	-0.03		04	Entered	67	Female	15SEP16	216	MF4637	>=250 mg/day	Yes	No	>=250 mg/day	No	Yes	Yes	Yes	Yes
Visit 5	141	93	52		175	46	42	0.91	04_030	Week 24	33.1	145	-4	70	23	52	0	169	6	32	1.1	46	-4	49	-3	0.94	-0.03	Gaining Weight	04	Entered	67	Female	15SEP16	216	MF4637	>=250 mg/day	Yes	No	>=250 mg/day	No	Yes	Yes	Yes	Yes
Visit 1	134	86	87	72	292				04_031	Screening	39.6	131		78		89		292		39.6		55		55		1			04	Entered	56	Male	22SEP16	217	Placebo	<250 mg/day	Yes	No	<250 mg/day	No	Yes	Yes	Yes	Yes
Visit 2	131	78	89		292	55	55	1	04_031	Baseline	39.6	131		78		89		292		39.6		55		55		1			04	Entered	56	Male	22SEP16	217	Placebo	<250 mg/day	Yes	No	<250 mg/day	No	Yes	Yes	Yes	Yes
Visit 3	133	94	91		291	54	55	1.02	04_031	Week 6	39.5	131	2	78	16	89	2	292	-1	39.6	-0.1	55	0	55	-1	1	0.02		04	Entered	56	Male	22SEP16	217	Placebo	<250 mg/day	Yes	No	<250 mg/day	No	Yes	Yes	Yes	Yes
Visit 4	119	77	93		292	54	54	1	04_031	Week 12	39.6	131	-12	78	-1	89	4	292	0	39.6	0	55	-1	55	-1	1	0		04	Entered	56	Male	22SEP16	217	Placebo	<250 mg/day	Yes	No	<250 mg/day	No	Yes	Yes	Yes	Yes
Visit 5	108	76	89		297	56	55.5	0.99	04_031	Week 24	40.3	131	-23	78	-2	89	0	292	5	39.6	0.7	55	0.5	55	1	1	-0.01	Gaining Weight	04	Entered	56	Male	22SEP16	217	Placebo	<250 mg/day	Yes	No	<250 mg/day	No	Yes	Yes	Yes	Yes
Visit 1	138	87	77	61	167				04_032	Screening	31.6	144		92		68		167		31.6		39		42		0.93			04	Early Termination	53	Female	22SEP16	218	MF4637	<250 mg/day	No	No	<250 mg/day	No	Yes	Yes	No	No
Visit 2	144	92	68		167	42	39	0.93	04_032	Baseline	31.6	144		92		68		167		31.6		39		42		0.93			04	Early Termination	53	Female	22SEP16	218	MF4637	<250 mg/day	No	No	<250 mg/day	No	Yes	Yes	No	No
Visit 3	128	89	69		168	42	39	0.93	04_032	Week 6	31.8	144	-16	92	-3	68	1	167	1	31.6	0.2	39	0	42	0	0.93	0		04	Early Termination	53	Female	22SEP16	218	MF4637	<250 mg/day	No	No	<250 mg/day	No	Yes	Yes	No	No
Visit 1	145	89	75	66	197				04_035	Screening	31.8	158		95		61		198		32		42		45		0.93			04	Entered	59	Female	10OCT16	219	Placebo	>=250 mg/day	No	No	>=250 mg/day	No	Yes	Yes	Yes	Yes
Visit 2	158	95	61		198	45	42	0.93	04_035	Baseline	32	158		95		61		198		32		42		45		0.93			04	Entered	59	Female	10OCT16	219	Placebo	>=250 mg/day	No	No	>=250 mg/day	No	Yes	Yes	Yes	Yes
Visit 3	128	89	77		197	45	43	0.96	04_035	Week 6	31.8	158	-30	95	-6	61	16	198	-1	32	-0.2	42	1	45	0	0.93	0.03		04	Entered	59	Female	10OCT16	219	Placebo	>=250 mg/day	No	No	>=250 mg/day	No	Yes	Yes	Yes	Yes
Visit 4	127	92	69		201	46	42	0.91	04_035	Week 12	32.5	158	-31	95	-3	61	8	198	3	32	0.5	42	0	45	1	0.93	-0.02		04	Entered	59	Female	10OCT16	219	Placebo	>=250 mg/day	No	No	>=250 mg/day	No	Yes	Yes	Yes	Yes
Visit 5	145	92	81		200	46	42	0.91	04_035	Week 24	32.3	158	-13	95	-3	61	20	198	2	32	0.3	42	0	45	1	0.93	-0.02	Gaining Weight	04	Entered	59	Female	10OCT16	219	Placebo	>=250 mg/day	No	No	>=250 mg/day	No	Yes	Yes	Yes	Yes
Visit 1	120	80	92	64	208				09_001	Screening	35.7	120		80		92		208		35.7									09	Screen Failure	45	Male							>=250 mg/day	Yes	No	No	No	No
Visit 1	120	80	83	66	218				09_002	Screening	35.2	120		80		83		218		35.2									09	Screen Failure	48	Male							<250 mg/day	Yes	No	No	No	No
Visit 1	120	80	79	66	207				09_003	Screening	33.4	120		80		79		207		33.4									09	Screen Failure	53	Male							<250 mg/day	Yes	No	No	No	No
Visit 1	128	84	79	66	216				09_004	Screening	34.9	129		84		80		216		34.9		46		43.5		1.06			09	Entered	48	Male	05FEB16	164	Placebo	>=250 mg/day	Yes	Yes	<250 mg/day	No	Yes	Yes	Yes	Yes
Visit 2	129	84	80		216	43.5	46	1.06	09_004	Baseline	34.9	129		84		80		216		34.9		46		43.5		1.06			09	Entered	48	Male	05FEB16	164	Placebo	>=250 mg/day	Yes	Yes	<250 mg/day	No	Yes	Yes	Yes	Yes
Visit 3	129	89	74		218	43	46	1.07	09_004	Week 6	35.2	129	0	84	5	80	-6	216	2	34.9	0.3	46	0	43.5	-0.5	1.06	0.01		09	Entered	48	Male	05FEB16	164	Placebo	>=250 mg/day	Yes	Yes	<250 mg/day	No	Yes	Yes	Yes	Yes
Visit 4	130	89	80		218	43	46	1.07	09_004	Week 12	35.2	129	1	84	5	80	0	216	2	34.9	0.3	46	0	43.5	-0.5	1.06	0.01		09	Entered	48	Male	05FEB16	164	Placebo	>=250 mg/day	Yes	Yes	<250 mg/day	No	Yes	Yes	Yes	Yes
Visit 5	139	67	63		218	43	46	1.07	09_004	Week 24	35.2	129	10	84	-17	80	-17	216	2	34.9	0.3	46	0	43.5	-0.5	1.06	0.01	Gaining Weight	09	Entered	48	Male	05FEB16	164	Placebo	>=250 mg/day	Yes	Yes	<250 mg/day	No	Yes	Yes	Yes	Yes
Visit 1	130	89	80	66	207				09_005	Screening	33.4	128		89		80		207		33.4		56		52		1.08			09	Entered	53	Male	05FEB16	166	MF4637	>=250 mg/day	Yes	Yes	<250 mg/day	No	Yes	Yes	Yes	Yes
Visit 2	128	89	80		207	52	56	1.08	09_005	Baseline	33.4	128		89		80		207		33.4		56		52		1.08			09	Entered	53	Male	05FEB16	166	MF4637	>=250 mg/day	Yes	Yes	<250 mg/day	No	Yes	Yes	Yes	Yes
Visit 3	129	90	88		208	50	55	1.1	09_005	Week 6	33.6	128	1	89	1	80	8	207	1	33.4	0.2	56	-1	52	-2	1.08	0.02		09	Entered	53	Male	05FEB16	166	MF4637	>=250 mg/day	Yes	Yes	<250 mg/day	No	Yes	Yes	Yes	Yes
Visit 4	130	90	82		207	41	45	1.1	09_005	Week 12	33.4	128	2	89	1	80	2	207	0	33.4	0	56	-11	52	-11	1.08	0.02		09	Entered	53	Male	05FEB16	166	MF4637	>=250 mg/day	Yes	Yes	<250 mg/day	No	Yes	Yes	Yes	Yes
Visit 5	110	80	80		214	41	44	1.07	09_005	Week 24	34.6	128	-18	89	-9	80	0	207	7	33.4	1.2	56	-12	52	-11	1.08	-0.01	Gaining Weight	09	Entered	53	Male	05FEB16	166	MF4637	>=250 mg/day	Yes	Yes	<250 mg/day	No	Yes	Yes	Yes	Yes
Visit 1	129	89	80	70	200				09_006	Screening	28.7	129		89		80		200		28.7									09	Screen Failure	72	Male							<250 mg/day	Yes	No	No	No	No
Visit 1	117	79	74	62	164				09_007	Screening	30	117		79		74		164		30									09	Screen Failure	49	Female							>=250 mg/day	Yes	No	No	No	No
Visit 1	124	89	82	66	176				09_008	Screening	28.4	124		88		82		175		28.3		39		40		0.98			09	Entered	49	Male	04MAR16	165	Placebo	<250 mg/day	No	No	<250 mg/day	No	Yes	Yes	Yes	Yes
Visit 2	124	88	82		175	40	39	0.98	09_008	Baseline	28.3	124		88		82		175		28.3		39		40		0.98			09	Entered	49	Male	04MAR16	165	Placebo	<250 mg/day	No	No	<250 mg/day	No	Yes	Yes	Yes	Yes
Visit 3	129	85	72		176	40	39	0.98	09_008	Week 6	28.4	124	5	88	-3	82	-10	175	1	28.3	0.1	39	0	40	0	0.98	0		09	Entered	49	Male	04MAR16	165	Placebo	<250 mg/day	No	No	<250 mg/day	No	Yes	Yes	Yes	Yes
Visit 4	130	80	72		175	39	41	1.05	09_008	Week 12	28.3	124	6	88	-8	82	-10	175	0	28.3	0	39	2	40	-1	0.98	0.07		09	Entered	49	Male	04MAR16	165	Placebo	<250 mg/day	No	No	<250 mg/day	No	Yes	Yes	Yes	Yes
Visit 5	130	80	72		175	41	39	0.95	09_008	Week 24	28.3	124	6	88	-8	82	-10	175	0	28.3	0	39	0	40	1	0.98	-0.03	Losing Weight (0-5%)	09	Entered	49	Male	04MAR16	165	Placebo	<250 mg/day	No	No	<250 mg/day	No	Yes	Yes	Yes	Yes
Visit 1	129	86	71	60	160				09_009	Screening	31.3	129		86		71		160		31.3									09	Screen Failure	73	Female							>=250 mg/day	Yes	No	No	No	No
Visit 1	124	79	70	63	172				09_010	Screening	30.5	124		79		70		172		30.5									09	Screen Failure	73	Female							>=250 mg/day	Yes	No	No	No	No
Visit 1	124	84	76	63	163				09_011	Screening	28.9	124		84		76		163		28.9									09	Screen Failure	68	Female							<250 mg/day	Yes	No	No	No	No
Visit 1	129	90	76	72	230				09_012	Screening	31.2	129		90		76		230		31.2									09	Screen Failure	73	Male							<250 mg/day	Yes	No	No	No	No
Visit 1	129	94	84	63	334				09_013	Screening	59.2	129		94		84		334		59.2									09	Screen Failure	57	Female							<250 mg/day	Yes	No	No	No	No
Visit 1	135	72	74	70	195				09_015	Screening	28	139		76		77		191		27.4		43		41		1.05			09	Entered	72	Male	04OCT16	167	MF4637	>=250 mg/day	Yes	No	<250 mg/day	No	Yes	Yes	Yes	Yes
Visit 2	139	76	77		191	41	43	1.05	09_015	Baseline	27.4	139		76		77		191		27.4		43		41		1.05			09	Entered	72	Male	04OCT16	167	MF4637	>=250 mg/day	Yes	No	<250 mg/day	No	Yes	Yes	Yes	Yes
Visit 3	134	75	67		191	36	40	1.11	09_015	Week 6	27.4	139	-5	76	-1	77	-10	191	0	27.4	0	43	-3	41	-5	1.05	0.06		09	Entered	72	Male	04OCT16	167	MF4637	>=250 mg/day	Yes	No	<250 mg/day	No	Yes	Yes	Yes	Yes
Visit 4	150	88	79		199	41	43	1.05	09_015	Week 12	28.6	139	11	76	12	77	2	191	8	27.4	1.2	43	0	41	0	1.05	0		09	Entered	72	Male	04OCT16	167	MF4637	>=250 mg/day	Yes	No	<250 mg/day	No	Yes	Yes	Yes	Yes
Visit 5	144	77	72		200	41	43	1.05	09_015	Week 24	28.7	139	5	76	1	77	-5	191	9	27.4	1.3	43	0	41	0	1.05	0	Gaining Weight	09	Entered	72	Male	04OCT16	167	MF4637	>=250 mg/day	Yes	No	<250 mg/day	No	Yes	Yes	Yes	Yes
Visit 1	149	66	64	66	160				09_016	Screening	25.8	149		66		64		160		25.8									09	Screen Failure	74	Female							<250 mg/day	Yes	No	No	No	No
Visit 1	119	70	68	63	160				09_017	Screening	28.4	119		70		68		160		28.4									09	Screen Failure	69	Female							<250 mg/day	Yes	No	No	No	No
Visit 1	145	103	83	72	235				09_018	Screening	31.9	134		80		76		265		36		49		46		1.07			09	Entered	73	Male	14NOV16	105	Placebo	>=250 mg/day	Yes	No	>=250 mg/day	No	Yes	Yes	Yes	Yes
Visit 2	134	80	76		265	46	49	1.07	09_018	Baseline	36	134		80		76		265		36		49		46		1.07			09	Entered	73	Male	14NOV16	105	Placebo	>=250 mg/day	Yes	No	>=250 mg/day	No	Yes	Yes	Yes	Yes
Visit 3	145	81	80		236	46	49	1.07	09_018	Week 6	32	134	11	80	1	76	4	265	-29	36	-4	49	0	46	0	1.07	0		09	Entered	73	Male	14NOV16	105	Placebo	>=250 mg/day	Yes	No	>=250 mg/day	No	Yes	Yes	Yes	Yes
Visit 4	133	76	71		233	46	49	1.07	09_018	Week 12	31.6	134	-1	80	-4	76	-5	265	-32	36	-4.4	49	0	46	0	1.07	0		09	Entered	73	Male	14NOV16	105	Placebo	>=250 mg/day	Yes	No	>=250 mg/day	No	Yes	Yes	Yes	Yes
Visit 5	125	70	71		234	46	49	1.07	09_018	Week 24	31.8	134	-9	80	-10	76	-5	265	-31	36	-4.2	49	0	46	0	1.07	0	Losing Weight (>5%)	09	Entered	73	Male	14NOV16	105	Placebo	>=250 mg/day	Yes	No	>=250 mg/day	No	Yes	Yes	Yes	Yes
Visit 1	149	81	59	65	170				09_019	Screening	28.3	149		81		59		170		28.3									09	Screen Failure	74	Female							<250 mg/day	Yes	No	No	No	No
Visit 1	140	70	68	61	159				09_020	Screening	30.1	160		88		90		156		29.5		44		44		1			09	Entered	53	Female	14OCT16	169	MF4637	>=250 mg/day	Yes	No	<250 mg/day	No	Yes	Yes	Yes	Yes
Visit 2	160	88	90		156	44	44	1	09_020	Baseline	29.5	160		88		90		156		29.5		44		44		1			09	Entered	53	Female	14OCT16	169	MF4637	>=250 mg/day	Yes	No	<250 mg/day	No	Yes	Yes	Yes	Yes
Visit 3	150	75	80		158	44	44	1	09_020	Week 6	29.9	160	-10	88	-13	90	-10	156	2	29.5	0.4	44	0	44	0	1	0		09	Entered	53	Female	14OCT16	169	MF4637	>=250 mg/day	Yes	No	<250 mg/day	No	Yes	Yes	Yes	Yes
Visit 4	144	82	97		157	43	44	1.02	09_020	Week 12	29.7	160	-16	88	-6	90	7	156	1	29.5	0.2	44	0	44	-1	1	0.02		09	Entered	53	Female	14OCT16	169	MF4637	>=250 mg/day	Yes	No	<250 mg/day	No	Yes	Yes	Yes	Yes
Visit 5	140	85	89		157	43	44	1.02	09_020	Week 24	29.7	160	-20	88	-3	90	-1	156	1	29.5	0.2	44	0	44	-1	1	0.02	Gaining Weight	09	Entered	53	Female	14OCT16	169	MF4637	>=250 mg/day	Yes	No	<250 mg/day	No	Yes	Yes	Yes	Yes
Visit 1	150	80	72	68	248				09_021	Screening	37.7	142		90		80		270		41.1		43		41		1.05			09	Entered	54	Male	27OCT16	104	MF4637	>=250 mg/day	No	No	<250 mg/day	No	Yes	Yes	Yes	Yes
Visit 2	142	90	80		270	41	43	1.05	09_021	Baseline	41.1	142		90		80		270		41.1		43		41		1.05			09	Entered	54	Male	27OCT16	104	MF4637	>=250 mg/day	No	No	<250 mg/day	No	Yes	Yes	Yes	Yes
Visit 3	140	85	80		269	43	41	0.95	09_021	Week 6	40.9	142	-2	90	-5	80	0	270	-1	41.1	-0.2	43	-2	41	2	1.05	-0.1		09	Entered	54	Male	27OCT16	104	MF4637	>=250 mg/day	No	No	<250 mg/day	No	Yes	Yes	Yes	Yes
Visit 4	162	95	69		253	42	45	1.07	09_021	Week 12	38.5	142	20	90	5	80	-11	270	-17	41.1	-2.6	43	2	41	1	1.05	0.02		09	Entered	54	Male	27OCT16	104	MF4637	>=250 mg/day	No	No	<250 mg/day	No	Yes	Yes	Yes	Yes
Visit 5	165	90	66		250	42	45	1.07	09_021	Week 24	38	142	23	90	0	80	-14	270	-20	41.1	-3.1	43	2	41	1	1.05	0.02	Losing Weight (>5%)	09	Entered	54	Male	27OCT16	104	MF4637	>=250 mg/day	No	No	<250 mg/day	No	Yes	Yes	Yes	Yes
Visit 1	155	80	80	69	260				09_022	Screening	38.4	155		80		80		260		38.4									09	Screen Failure	55	Male							<250 mg/day	Yes	No	No	No	No
Visit 1	100	60	60	66	147				09_023	Screening	23.7	100		60		60		147		23.7									09	Screen Failure	68	Female							<250 mg/day	Yes	No	No	No	No
Visit 1	150	90	68	71	228				09_024	Screening	31.8	150		89		74		258		36		47		46		1.02			09	Entered	47	Male	04OCT16	168	Placebo	>=250 mg/day	Yes	No	<250 mg/day	No	Yes	Yes	Yes	No
Visit 2	150	89	74		258	46	47	1.02	09_024	Baseline	36	150		89		74		258		36		47		46		1.02			09	Entered	47	Male	04OCT16	168	Placebo	>=250 mg/day	Yes	No	<250 mg/day	No	Yes	Yes	Yes	No
Visit 3	155	90	80		250	46	44	0.96	09_024	Week 6	34.9	150	5	89	1	74	6	258	-8	36	-1.1	47	-3	46	0	1.02	-0.06		09	Entered	47	Male	04OCT16	168	Placebo	>=250 mg/day	Yes	No	<250 mg/day	No	Yes	Yes	Yes	No
Visit 4	220	127	87		250	46	47	1.02	09_024	Week 12	34.9	150	70	89	38	74	13	258	-8	36	-1.1	47	0	46	0	1.02	0		09	Entered	47	Male	04OCT16	168	Placebo	>=250 mg/day	Yes	No	<250 mg/day	No	Yes	Yes	Yes	No
Visit 5	200	129	84		230	45	46	1.02	09_024	Week 24	32.1	150	50	89	40	74	10	258	-28	36	-3.9	47	-1	46	-1	1.02	0	Losing Weight (>5%)	09	Entered	47	Male	04OCT16	168	Placebo	>=250 mg/day	Yes	No	<250 mg/day	No	Yes	Yes	Yes	No
Visit 1	136	82	76	64	156				09_025	Screening	26.8	136		82		76		156		26.8									09	Screen Failure	70	Female							<250 mg/day	Yes	No	No	No	No
Visit 1	126	81	80	71	182				09_026	Screening	25.4	120		80		80		184		25.7		42		47		0.89			09	Entered	55	Female	12DEC16	171	Placebo	>=250 mg/day	No	No	<250 mg/day	No	Yes	Yes	Yes	Yes
Visit 2	120	80	80		184	47	42	0.89	09_026	Baseline	25.7	120		80		80		184		25.7		42		47		0.89			09	Entered	55	Female	12DEC16	171	Placebo	>=250 mg/day	No	No	<250 mg/day	No	Yes	Yes	Yes	Yes
Visit 3	133	82	73		192	42	47	1.12	09_026	Week 6	26.8	120	13	80	2	80	-7	184	8	25.7	1.1	42	5	47	-5	0.89	0.23		09	Entered	55	Female	12DEC16	171	Placebo	>=250 mg/day	No	No	<250 mg/day	No	Yes	Yes	Yes	Yes
Visit 4	124	70	74		188	45	42	0.93	09_026	Week 12	26.2	120	4	80	-10	80	-6	184	4	25.7	0.5	42	0	47	-2	0.89	0.04		09	Entered	55	Female	12DEC16	171	Placebo	>=250 mg/day	No	No	<250 mg/day	No	Yes	Yes	Yes	Yes
Visit 5	122	80	90		188	45	42	0.93	09_026	Week 24	26.2	120	2	80	0	80	10	184	4	25.7	0.5	42	0	47	-2	0.89	0.04	Gaining Weight	09	Entered	55	Female	12DEC16	171	Placebo	>=250 mg/day	No	No	<250 mg/day	No	Yes	Yes	Yes	Yes
Visit 1	116	69	76	64	176				09_027	Screening	30.2	115		70		76		117		20.1		42		47		0.89			09	Early Termination	60	Female	12DEC16	107	Placebo	>=250 mg/day	Yes	No	<250 mg/day	No	Yes	Yes	No	No
Visit 2	115	70	76		117	47	42	0.89	09_027	Baseline	20.1	115		70		76		117		20.1		42		47		0.89			09	Early Termination	60	Female	12DEC16	107	Placebo	>=250 mg/day	Yes	No	<250 mg/day	No	Yes	Yes	No	No
Visit 3	118	82	66		177	46	42	0.91	09_027	Week 6	30.4	115	3	70	12	76	-10	117	60	20.1	10.3	42	0	47	-1	0.89	0.02		09	Early Termination	60	Female	12DEC16	107	Placebo	>=250 mg/day	Yes	No	<250 mg/day	No	Yes	Yes	No	No
Visit 1	138	78	74	66	206				09_028	Screening	33.3	138		78		74		206		33.3									09	Screen Failure	44	Female							<250 mg/day	Yes	No	No	No	No
Visit 1	110	87	99	63	167				09_029	Screening	29.6	115		70		80		165		29.3		40		44		0.91			09	Early Termination	63	Female	12DEC16	106	MF4637	>=250 mg/day	Yes	No	<250 mg/day	No	Yes	Yes	No	No
Visit 2	115	70	80		165	44	40	0.91	09_029	Baseline	29.3	115		70		80		165		29.3		40		44		0.91			09	Early Termination	63	Female	12DEC16	106	MF4637	>=250 mg/day	Yes	No	<250 mg/day	No	Yes	Yes	No	No
Visit 3	120	75	80		162	43	40	0.93	09_029	Week 6	28.7	115	5	70	5	80	0	165	-3	29.3	-0.6	40	0	44	-1	0.91	0.02		09	Early Termination	63	Female	12DEC16	106	MF4637	>=250 mg/day	Yes	No	<250 mg/day	No	Yes	Yes	No	No
Visit 1	123	89	96	62	149				09_030	Screening	27.3	120		85		85		147		26.9		43		40		1.08			09	Entered	59	Female	12DEC16	170	MF4637	>=250 mg/day	No	No	<250 mg/day	No	Yes	Yes	Yes	Yes
Visit 2	120	85	85		147	40	43	1.08	09_030	Baseline	26.9	120		85		85		147		26.9		43		40		1.08			09	Entered	59	Female	12DEC16	170	MF4637	>=250 mg/day	No	No	<250 mg/day	No	Yes	Yes	Yes	Yes
Visit 3	122	77	86		156	42	41	0.98	09_030	Week 6	28.6	120	2	85	-8	85	1	147	9	26.9	1.7	43	-2	40	2	1.08	-0.1		09	Entered	59	Female	12DEC16	170	MF4637	>=250 mg/day	No	No	<250 mg/day	No	Yes	Yes	Yes	Yes
Visit 4	130	85	74		154	42	41	0.98	09_030	Week 12	28.2	120	10	85	0	85	-11	147	7	26.9	1.3	43	-2	40	2	1.08	-0.1		09	Entered	59	Female	12DEC16	170	MF4637	>=250 mg/day	No	No	<250 mg/day	No	Yes	Yes	Yes	Yes
Visit 5	112	76	90		153	42	41	0.98	09_030	Week 24	28	120	-8	85	-9	85	5	147	6	26.9	1.1	43	-2	40	2	1.08	-0.1	Gaining Weight	09	Entered	59	Female	12DEC16	170	MF4637	>=250 mg/day	No	No	<250 mg/day	No	Yes	Yes	Yes	Yes
Visit 1	124	74	66	72	275				10_001	Screening	37.3	124		74		66		275		37.3									10	Screen Failure	31	Male							>=250 mg/day	Yes	No	No	No	No
Visit 1	128	84	84	68	234.5				10_002	Screening	35.7	128		84		84		234.5		35.7									10	Screen Failure	33	Male							<250 mg/day	Yes	No	No	No	No
Visit 1	136	78	72	67	250.8				10_003	Screening	39.3	136		78		72		250.8		39.3									10	Screen Failure	54	Female							<250 mg/day	Yes	No	No	No	No
Visit 1	138	78	64	69	192.3				10_004	Screening	28.4	130		74		64		189.9		28.1		41		42		0.98			10	Entered	47	Male	01FEB16	172	MF4637	>=250 mg/day	No	No	>=250 mg/day	No	Yes	Yes	Yes	Yes
Visit 2	130	74	64		189.9	42	41	0.98	10_004	Baseline	28.1	130		74		64		189.9		28.1		41		42		0.98			10	Entered	47	Male	01FEB16	172	MF4637	>=250 mg/day	No	No	>=250 mg/day	No	Yes	Yes	Yes	Yes
Visit 3	128	72	64		188.1	41	38	0.93	10_004	Week 6	27.8	130	-2	74	-2	64	0	189.9	-1.8	28.1	-0.3	41	-3	42	-1	0.98	-0.05		10	Entered	47	Male	01FEB16	172	MF4637	>=250 mg/day	No	No	>=250 mg/day	No	Yes	Yes	Yes	Yes
Visit 4	130	82	64		186.8	41	38	0.93	10_004	Week 12	27.6	130	0	74	8	64	0	189.9	-3.1	28.1	-0.5	41	-3	42	-1	0.98	-0.05		10	Entered	47	Male	01FEB16	172	MF4637	>=250 mg/day	No	No	>=250 mg/day	No	Yes	Yes	Yes	Yes
Visit 5	122	78	68		188.1	42	38.5	0.92	10_004	Week 24	27.8	130	-8	74	4	64	4	189.9	-1.8	28.1	-0.3	41	-2.5	42	0	0.98	-0.06	Losing Weight (0-5%)	10	Entered	47	Male	01FEB16	172	MF4637	>=250 mg/day	No	No	>=250 mg/day	No	Yes	Yes	Yes	Yes
Visit 1	138	74	62	70	200.9				10_006	Screening	28.9	130		82		56		196		28.1		40.5		43.5		0.93			10	Entered	55	Male	25FEB16	174	Placebo	<250 mg/day	No	No	<250 mg/day	No	Yes	Yes	Yes	Yes
Visit 2	130	82	56		196	43.5	40.5	0.93	10_006	Baseline	28.1	130		82		56		196		28.1		40.5		43.5		0.93			10	Entered	55	Male	25FEB16	174	Placebo	<250 mg/day	No	No	<250 mg/day	No	Yes	Yes	Yes	Yes
Visit 3	124	72	58		193.2	42.5	40	0.94	10_006	Week 6	27.7	130	-6	82	-10	56	2	196	-2.8	28.1	-0.4	40.5	-0.5	43.5	-1	0.93	0.01		10	Entered	55	Male	25FEB16	174	Placebo	<250 mg/day	No	No	<250 mg/day	No	Yes	Yes	Yes	Yes
Visit 4	128	86	64		194.5	42.5	40	0.94	10_006	Week 12	27.9	130	-2	82	4	56	8	196	-1.5	28.1	-0.2	40.5	-0.5	43.5	-1	0.93	0.01		10	Entered	55	Male	25FEB16	174	Placebo	<250 mg/day	No	No	<250 mg/day	No	Yes	Yes	Yes	Yes
Visit 5	118	70	62		194.7	42.5	39.5	0.93	10_006	Week 24	28	130	-12	82	-12	56	6	196	-1.3	28.1	-0.1	40.5	-1	43.5	-1	0.93	0	Losing Weight (0-5%)	10	Entered	55	Male	25FEB16	174	Placebo	<250 mg/day	No	No	<250 mg/day	No	Yes	Yes	Yes	Yes
Visit 1	128	84	88	67	239.8				10_007	Screening	37.6	122		78		72		240		37.6		54.5		51.5		1.06			10	Entered	54	Female	01MAR16	173	MF4637	<250 mg/day	No	Yes	<250 mg/day	No	Yes	Yes	Yes	Yes
Visit 2	122	78	72		240	51.5	54.5	1.06	10_007	Baseline	37.6	122		78		72		240		37.6		54.5		51.5		1.06			10	Entered	54	Female	01MAR16	173	MF4637	<250 mg/day	No	Yes	<250 mg/day	No	Yes	Yes	Yes	Yes
Visit 3	114	68	80		234.5	50.5	54	1.07	10_007	Week 6	36.8	122	-8	78	-10	72	8	240	-5.5	37.6	-0.8	54.5	-0.5	51.5	-1	1.06	0.01		10	Entered	54	Female	01MAR16	173	MF4637	<250 mg/day	No	Yes	<250 mg/day	No	Yes	Yes	Yes	Yes
Visit 4	128	80	72		233.4	50	54	1.08	10_007	Week 12	36.6	122	6	78	2	72	0	240	-6.6	37.6	-1	54.5	-0.5	51.5	-1.5	1.06	0.02		10	Entered	54	Female	01MAR16	173	MF4637	<250 mg/day	No	Yes	<250 mg/day	No	Yes	Yes	Yes	Yes
Visit 5	118	86	76		238	51	53.5	1.05	10_007	Week 24	37.3	122	-4	78	8	72	4	240	-2	37.6	-0.3	54.5	-1	51.5	-0.5	1.06	-0.01	Losing Weight (0-5%)	10	Entered	54	Female	01MAR16	173	MF4637	<250 mg/day	No	Yes	<250 mg/day	No	Yes	Yes	Yes	Yes
Visit 1	132	74	76	60	179.1				10_009	Screening	35	128		64		72		179.3		35		43		46		0.93			10	Entered	64	Female	27JUN16	176	MF4637	<250 mg/day	No	No	<250 mg/day	No	Yes	Yes	Yes	Yes
Visit 2	128	64	72		179.3	46	43	0.93	10_009	Baseline	35	128		64		72		179.3		35		43		46		0.93			10	Entered	64	Female	27JUN16	176	MF4637	<250 mg/day	No	No	<250 mg/day	No	Yes	Yes	Yes	Yes
Visit 3	148	84	80		182.6	46	43	0.93	10_009	Week 6	35.7	128	20	64	20	72	8	179.3	3.3	35	0.7	43	0	46	0	0.93	0		10	Entered	64	Female	27JUN16	176	MF4637	<250 mg/day	No	No	<250 mg/day	No	Yes	Yes	Yes	Yes
Visit 4	132	78	72		185	45	43.5	0.97	10_009	Week 12	36.2	128	4	64	14	72	0	179.3	5.7	35	1.2	43	0.5	46	-1	0.93	0.04		10	Entered	64	Female	27JUN16	176	MF4637	<250 mg/day	No	No	<250 mg/day	No	Yes	Yes	Yes	Yes
Visit 5	128	68	76		186.8	45.5	44	0.97	10_009	Week 24	36.5	128	0	64	4	72	4	179.3	7.5	35	1.5	43	1	46	-0.5	0.93	0.04	Gaining Weight	10	Entered	64	Female	27JUN16	176	MF4637	<250 mg/day	No	No	<250 mg/day	No	Yes	Yes	Yes	Yes
Visit 1	154	88	68	68	254.7				10_010	Screening	38.8	150		80		68		253		38.5		45.5		46.5		0.98			10	Entered	34	Male	27SEP16	175	Placebo	>=250 mg/day	No	No	>=250 mg/day	No	Yes	Yes	Yes	Yes
Visit 2	150	80	68		253	46.5	45.5	0.98	10_010	Baseline	38.5	150		80		68		253		38.5		45.5		46.5		0.98			10	Entered	34	Male	27SEP16	175	Placebo	>=250 mg/day	No	No	>=250 mg/day	No	Yes	Yes	Yes	Yes
Visit 3	146	86	76		254.7	46.5	45.5	0.98	10_010	Week 6	38.8	150	-4	80	6	68	8	253	1.7	38.5	0.3	45.5	0	46.5	0	0.98	0		10	Entered	34	Male	27SEP16	175	Placebo	>=250 mg/day	No	No	>=250 mg/day	No	Yes	Yes	Yes	Yes
Visit 4	148	90	68		254.8	45.5	46	1.01	10_010	Week 12	38.8	150	-2	80	10	68	0	253	1.8	38.5	0.3	45.5	0.5	46.5	-1	0.98	0.03		10	Entered	34	Male	27SEP16	175	Placebo	>=250 mg/day	No	No	>=250 mg/day	No	Yes	Yes	Yes	Yes
Visit 5	142	80	66		252.1	45.5	45.5	1	10_010	Week 24	38.4	150	-8	80	0	68	-2	253	-0.9	38.5	-0.1	45.5	0	46.5	-1	0.98	0.02	Losing Weight (0-5%)	10	Entered	34	Male	27SEP16	175	Placebo	>=250 mg/day	No	No	>=250 mg/day	No	Yes	Yes	Yes	Yes
Visit 1	118	72	68	66	189				10_012	Screening	30.5	118		68		68		185.9		30		41		43.5		0.94			10	Entered	53	Male	12OCT16	177	Placebo	<250 mg/day	No	Yes	<250 mg/day	No	Yes	Yes	Yes	Yes
Visit 2	118	68	68		185.9	43.5	41	0.94	10_012	Baseline	30	118		68		68		185.9		30		41		43.5		0.94			10	Entered	53	Male	12OCT16	177	Placebo	<250 mg/day	No	Yes	<250 mg/day	No	Yes	Yes	Yes	Yes
Visit 3	138	78	80		181.5	43.5	40.5	0.93	10_012	Week 6	29.3	118	20	68	10	68	12	185.9	-4.4	30	-0.7	41	-0.5	43.5	0	0.94	-0.01		10	Entered	53	Male	12OCT16	177	Placebo	<250 mg/day	No	Yes	<250 mg/day	No	Yes	Yes	Yes	Yes
Visit 4	120	84	68		178	42	39	0.93	10_012	Week 12	28.8	118	2	68	16	68	0	185.9	-7.9	30	-1.2	41	-2	43.5	-1.5	0.94	-0.01		10	Entered	53	Male	12OCT16	177	Placebo	<250 mg/day	No	Yes	<250 mg/day	No	Yes	Yes	Yes	Yes
Visit 5	138	64	78		179.1	42	39	0.93	10_012	Week 24	28.9	118	20	68	-4	68	10	185.9	-6.8	30	-1.1	41	-2	43.5	-1.5	0.94	-0.01	Losing Weight (0-5%)	10	Entered	53	Male	12OCT16	177	Placebo	<250 mg/day	No	Yes	<250 mg/day	No	Yes	Yes	Yes	Yes
Visit 1	138	86	70	64	221.8				11_003	Screening	38.1	125		90		79		216.8		37.2		42		41.5		1.01			11	Early Termination	52	Male	15SEP16	142	Placebo	<250 mg/day	Yes	Yes	>=250 mg/day	No	Yes	Yes	Yes	Yes
Visit 2	125	90	79		216.8	41.5	42	1.01	11_003	Baseline	37.2	125		90		79		216.8		37.2		42		41.5		1.01			11	Early Termination	52	Male	15SEP16	142	Placebo	<250 mg/day	Yes	Yes	>=250 mg/day	No	Yes	Yes	Yes	Yes
Visit 3	130	90	79		219.4	41.5	41	0.99	11_003	Week 6	37.7	125	5	90	0	79	0	216.8	2.6	37.2	0.5	42	-1	41.5	0	1.01	-0.02		11	Early Termination	52	Male	15SEP16	142	Placebo	<250 mg/day	Yes	Yes	>=250 mg/day	No	Yes	Yes	Yes	Yes
Visit 4	130	90	78		218.2	40.3	40.7	1.01	11_003	Week 12	37.5	125	5	90	0	79	-1	216.8	1.4	37.2	0.3	42	-1.3	41.5	-1.2	1.01	0		11	Early Termination	52	Male	15SEP16	142	Placebo	<250 mg/day	Yes	Yes	>=250 mg/day	No	Yes	Yes	Yes	Yes
Visit 1	130	88	76	63	145.9				11_004	Screening	25.9	120		85		79		143		25.4		35.5		34.9		1.02			11	Entered	42	Female	02SEP16	140	MF4637	<250 mg/day	Yes	No	<250 mg/day	No	Yes	Yes	Yes	Yes
Visit 2	120	85	79		143	34.9	35.5	1.02	11_004	Baseline	25.4	120		85		79		143		25.4		35.5		34.9		1.02			11	Entered	42	Female	02SEP16	140	MF4637	<250 mg/day	Yes	No	<250 mg/day	No	Yes	Yes	Yes	Yes
Visit 3	120	80	71		145.4	34.4	34.8	1.01	11_004	Week 6	25.8	120	0	85	-5	79	-8	143	2.4	25.4	0.4	35.5	-0.7	34.9	-0.5	1.02	-0.01		11	Entered	42	Female	02SEP16	140	MF4637	<250 mg/day	Yes	No	<250 mg/day	No	Yes	Yes	Yes	Yes
Visit 4	116	83	78		143.6	36.3	35.4	0.98	11_004	Week 12	25.5	120	-4	85	-2	79	-1	143	0.6	25.4	0.1	35.5	-0.1	34.9	1.4	1.02	-0.04		11	Entered	42	Female	02SEP16	140	MF4637	<250 mg/day	Yes	No	<250 mg/day	No	Yes	Yes	Yes	Yes
Visit 5	110	80	72		148.8	38	35.2	0.93	11_004	Week 24	26.4	120	-10	85	-5	79	-7	143	5.8	25.4	1	35.5	-0.3	34.9	3.1	1.02	-0.09	Gaining Weight	11	Entered	42	Female	02SEP16	140	MF4637	<250 mg/day	Yes	No	<250 mg/day	No	Yes	Yes	Yes	Yes
Visit 1	140	86	70	67	214				11_005	Screening	33.5	130		90		79		208.6		32.7		41		44		0.93			11	Early Termination	63	Male	26SEP16	141	MF4637	>=250 mg/day	No	No	>=250 mg/day	No	Yes	Yes	No	No
Visit 2	130	90	79		208.6	44	41	0.93	11_005	Baseline	32.7	130		90		79		208.6		32.7		41		44		0.93			11	Early Termination	63	Male	26SEP16	141	MF4637	>=250 mg/day	No	No	>=250 mg/day	No	Yes	Yes	No	No
Visit 3	156	91	73		210	45	43	0.96	11_005	Week 6	32.9	130	26	90	1	79	-6	208.6	1.4	32.7	0.2	41	2	44	1	0.93	0.03		11	Early Termination	63	Male	26SEP16	141	MF4637	>=250 mg/day	No	No	>=250 mg/day	No	Yes	Yes	No	No
Visit 1	110	70	64	54	136				11_006	Screening	32.8	120		78		70		137		33.1		37		39.5		0.94			11	Entered	54	Female	29SEP16	146	Placebo	<250 mg/day	Yes	No	>=250 mg/day	No	Yes	Yes	Yes	Yes
Visit 2	120	78	70		137	39.5	37	0.94	11_006	Baseline	33.1	120		78		70		137		33.1		37		39.5		0.94			11	Entered	54	Female	29SEP16	146	Placebo	<250 mg/day	Yes	No	>=250 mg/day	No	Yes	Yes	Yes	Yes
Visit 3	117	78	69		135.3	41	38	0.93	11_006	Week 6	32.7	120	-3	78	0	70	-1	137	-1.7	33.1	-0.4	37	1	39.5	1.5	0.94	-0.01		11	Entered	54	Female	29SEP16	146	Placebo	<250 mg/day	Yes	No	>=250 mg/day	No	Yes	Yes	Yes	Yes
Visit 4	111	73	67		136.8	40	36.5	0.91	11_006	Week 12	33	120	-9	78	-5	70	-3	137	-0.2	33.1	-0.1	37	-0.5	39.5	0.5	0.94	-0.03		11	Entered	54	Female	29SEP16	146	Placebo	<250 mg/day	Yes	No	>=250 mg/day	No	Yes	Yes	Yes	Yes
Visit 5	110	71	63		135	39.37	32.28	0.82	11_006	Week 24	32.6	120	-10	78	-7	70	-7	137	-2	33.1	-0.5	37	-4.72	39.5	-0.13	0.94	-0.12	Losing Weight (0-5%)	11	Entered	54	Female	29SEP16	146	Placebo	<250 mg/day	Yes	No	>=250 mg/day	No	Yes	Yes	Yes	Yes
Visit 1	120	75	57	66	186.9				11_007	Screening	30.2	120		75		57		186.9		30.2									11	Screen Failure	48	Female							>=250 mg/day	Yes	No	No	No	No
Visit 1	130	82	52	69	189				11_008	Screening	27.9	110		70		50		188.4		27.8		37.2		41		0.91			11	Entered	42	Male	27SEP16	144	MF4637	<250 mg/day	No	No	>=250 mg/day	No	Yes	Yes	Yes	Yes
Visit 2	110	70	50		188.4	41	37.2	0.91	11_008	Baseline	27.8	110		70		50		188.4		27.8		37.2		41		0.91			11	Entered	42	Male	27SEP16	144	MF4637	<250 mg/day	No	No	>=250 mg/day	No	Yes	Yes	Yes	Yes
Visit 3	113	66	58		182	42	38	0.9	11_008	Week 6	26.9	110	3	70	-4	50	8	188.4	-6.4	27.8	-0.9	37.2	0.8	41	1	0.91	-0.01		11	Entered	42	Male	27SEP16	144	MF4637	<250 mg/day	No	No	>=250 mg/day	No	Yes	Yes	Yes	Yes
Visit 4	118	74	68		182.5	39	38	0.97	11_008	Week 12	27	110	8	70	4	50	18	188.4	-5.9	27.8	-0.8	37.2	0.8	41	-2	0.91	0.06		11	Entered	42	Male	27SEP16	144	MF4637	<250 mg/day	No	No	>=250 mg/day	No	Yes	Yes	Yes	Yes
Visit 5	120	64	50		184	38.1	38.5	1.01	11_008	Week 24	27.2	110	10	70	-6	50	0	188.4	-4.4	27.8	-0.6	37.2	1.3	41	-2.9	0.91	0.1	Losing Weight (0-5%)	11	Entered	42	Male	27SEP16	144	MF4637	<250 mg/day	No	No	>=250 mg/day	No	Yes	Yes	Yes	Yes
Visit 1	120	78	86	66	245				11_009	Screening	39.6	130		89		88		244.1		39.4		45.8		51.7		0.89			11	Entered	50	Female	01OCT16	147	Placebo	<250 mg/day	No	No	<250 mg/day	No	Yes	Yes	Yes	Yes
Visit 2	130	89	88		244.1	51.7	45.8	0.89	11_009	Baseline	39.4	130		89		88		244.1		39.4		45.8		51.7		0.89			11	Entered	50	Female	01OCT16	147	Placebo	<250 mg/day	No	No	<250 mg/day	No	Yes	Yes	Yes	Yes
Visit 3	132	90	95		245	49	47.5	0.97	11_009	Week 6	39.6	130	2	89	1	88	7	244.1	0.9	39.4	0.2	45.8	1.7	51.7	-2.7	0.89	0.08		11	Entered	50	Female	01OCT16	147	Placebo	<250 mg/day	No	No	<250 mg/day	No	Yes	Yes	Yes	Yes
Visit 4	128	83	95		252	48	46	0.96	11_009	Week 12	40.7	130	-2	89	-6	88	7	244.1	7.9	39.4	1.3	45.8	0.2	51.7	-3.7	0.89	0.07		11	Entered	50	Female	01OCT16	147	Placebo	<250 mg/day	No	No	<250 mg/day	No	Yes	Yes	Yes	Yes
Visit 5	113	64	80		253	47.24	41.33	0.87	11_009	Week 24	40.9	130	-17	89	-25	88	-8	244.1	8.9	39.4	1.5	45.8	-4.47	51.7	-4.46	0.89	-0.02	Gaining Weight	11	Entered	50	Female	01OCT16	147	Placebo	<250 mg/day	No	No	<250 mg/day	No	Yes	Yes	Yes	Yes
Visit 1	118	81	70	61	144.2				11_010	Screening	27.3	120		80		95		144.4		27.3		33.9		39.7		0.85			11	Entered	52	Female	27SEP16	143	Placebo	<250 mg/day	No	Yes	<250 mg/day	No	Yes	Yes	Yes	Yes
Visit 2	120	80	95		144.4	39.7	33.9	0.85	11_010	Baseline	27.3	120		80		95		144.4		27.3		33.9		39.7		0.85			11	Entered	52	Female	27SEP16	143	Placebo	<250 mg/day	No	Yes	<250 mg/day	No	Yes	Yes	Yes	Yes
Visit 3	95	72	85		147	39	34	0.87	11_010	Week 6	27.8	120	-25	80	-8	95	-10	144.4	2.6	27.3	0.5	33.9	0.1	39.7	-0.7	0.85	0.02		11	Entered	52	Female	27SEP16	143	Placebo	<250 mg/day	No	Yes	<250 mg/day	No	Yes	Yes	Yes	Yes
Visit 4	103	74	90		149	38	34	0.89	11_010	Week 12	28.2	120	-17	80	-6	95	-5	144.4	4.6	27.3	0.9	33.9	0.1	39.7	-1.7	0.85	0.04		11	Entered	52	Female	27SEP16	143	Placebo	<250 mg/day	No	Yes	<250 mg/day	No	Yes	Yes	Yes	Yes
Visit 5	106	82	89		148.8	39.3	32.28	0.82	11_010	Week 24	28.1	120	-14	80	2	95	-6	144.4	4.4	27.3	0.8	33.9	-1.62	39.7	-0.4	0.85	-0.03	Gaining Weight	11	Entered	52	Female	27SEP16	143	Placebo	<250 mg/day	No	Yes	<250 mg/day	No	Yes	Yes	Yes	Yes
Visit 1	120	86	82	68	258				11_011	Screening	39.3	110		80		72		258		39.3		47		55.5		0.85			11	Entered	41	Female	19OCT16	244	Placebo	<250 mg/day	No	No	>=250 mg/day	No	Yes	Yes	Yes	Yes
Visit 2	110	80	72		258	55.5	47	0.85	11_011	Baseline	39.3	110		80		72		258		39.3		47		55.5		0.85			11	Entered	41	Female	19OCT16	244	Placebo	<250 mg/day	No	No	>=250 mg/day	No	Yes	Yes	Yes	Yes
Visit 3	118	88	68		250	54	39.5	0.73	11_011	Week 6	38	110	8	80	8	72	-4	258	-8	39.3	-1.3	47	-7.5	55.5	-1.5	0.85	-0.12		11	Entered	41	Female	19OCT16	244	Placebo	<250 mg/day	No	No	>=250 mg/day	No	Yes	Yes	Yes	Yes
Visit 4	96	76	77		251	51	49	0.96	11_011	Week 12	38.2	110	-14	80	-4	72	5	258	-7	39.3	-1.1	47	2	55.5	-4.5	0.85	0.11		11	Entered	41	Female	19OCT16	244	Placebo	<250 mg/day	No	No	>=250 mg/day	No	Yes	Yes	Yes	Yes
Visit 5	130	97	78		262	55	44.4	0.81	11_011	Week 24	39.9	110	20	80	17	72	6	258	4	39.3	0.6	47	-2.6	55.5	-0.5	0.85	-0.04	Gaining Weight	11	Entered	41	Female	19OCT16	244	Placebo	<250 mg/day	No	No	>=250 mg/day	No	Yes	Yes	Yes	Yes
Visit 1	154	93	74	67	255				11_012	Screening	40	140		90		88		244.6		38.3		49.9		49.4		1.01			11	Entered	40	Female	18OCT16	145	MF4637	<250 mg/day	No	No	<250 mg/day	No	Yes	Yes	Yes	Yes
Visit 2	140	90	88		244.6	49.4	49.9	1.01	11_012	Baseline	38.3	140		90		88		244.6		38.3		49.9		49.4		1.01			11	Entered	40	Female	18OCT16	145	MF4637	<250 mg/day	No	No	<250 mg/day	No	Yes	Yes	Yes	Yes
Visit 3	126	93	81		265.8	49	49.5	1.01	11_012	Week 6	41.7	140	-14	90	3	88	-7	244.6	21.2	38.3	3.4	49.9	-0.4	49.4	-0.4	1.01	0		11	Entered	40	Female	18OCT16	145	MF4637	<250 mg/day	No	No	<250 mg/day	No	Yes	Yes	Yes	Yes
Visit 4	124	84	84		269	51	49	0.96	11_012	Week 12	42.2	140	-16	90	-6	88	-4	244.6	24.4	38.3	3.9	49.9	-0.9	49.4	1.6	1.01	-0.05		11	Entered	40	Female	18OCT16	145	MF4637	<250 mg/day	No	No	<250 mg/day	No	Yes	Yes	Yes	Yes
Visit 5	133	87	78		269	47.6	47.2	0.99	11_012	Week 24	42.2	140	-7	90	-3	88	-10	244.6	24.4	38.3	3.9	49.9	-2.7	49.4	-1.8	1.01	-0.02	Gaining Weight	11	Entered	40	Female	18OCT16	145	MF4637	<250 mg/day	No	No	<250 mg/day	No	Yes	Yes	Yes	Yes
Visit 1	135	90	76	70	183				11_014	Screening	26.3	110		90		88		181		26		36.7		41.6		0.88			11	Entered	49	Female	17NOV16	247	Placebo	>=250 mg/day	No	No	>=250 mg/day	No	Yes	Yes	Yes	No
Visit 2	110	90	88		181	41.6	36.7	0.88	11_014	Baseline	26	110		90		88		181		26		36.7		41.6		0.88			11	Entered	49	Female	17NOV16	247	Placebo	>=250 mg/day	No	No	>=250 mg/day	No	Yes	Yes	Yes	No
Visit 3	141	97	71		182	40	35.5	0.89	11_014	Week 6	26.1	110	31	90	7	88	-17	181	1	26	0.1	36.7	-1.2	41.6	-1.6	0.88	0.01		11	Entered	49	Female	17NOV16	247	Placebo	>=250 mg/day	No	No	>=250 mg/day	No	Yes	Yes	Yes	No
Visit 4	130	85	87		180	40.9	37.5	0.92	11_014	Week 12	25.9	110	20	90	-5	88	-1	181	-1	26	-0.1	36.7	0.8	41.6	-0.7	0.88	0.04		11	Entered	49	Female	17NOV16	247	Placebo	>=250 mg/day	No	No	>=250 mg/day	No	Yes	Yes	Yes	No
Visit 5	146	97	82		176	40	35	0.88	11_014	Week 24	25.3	110	36	90	7	88	-6	181	-5	26	-0.7	36.7	-1.7	41.6	-1.6	0.88	0	Losing Weight (0-5%)	11	Entered	49	Female	17NOV16	247	Placebo	>=250 mg/day	No	No	>=250 mg/day	No	Yes	Yes	Yes	No
Visit 1	150	90	51	62	134				11_015	Screening	24.5	130		86		55		133		24.3		33.3		38		0.88			11	Entered	62	Male	10NOV16	245	MF4637	<250 mg/day	No	No	>=250 mg/day	No	Yes	Yes	Yes	Yes
Visit 2	130	86	55		133	38	33.3	0.88	11_015	Baseline	24.3	130		86		55		133		24.3		33.3		38		0.88			11	Entered	62	Male	10NOV16	245	MF4637	<250 mg/day	No	No	>=250 mg/day	No	Yes	Yes	Yes	Yes
Visit 3	127	74	52		133.2	38	34	0.89	11_015	Week 6	24.4	130	-3	86	-12	55	-3	133	0.2	24.3	0.1	33.3	0.7	38	0	0.88	0.01		11	Entered	62	Male	10NOV16	245	MF4637	<250 mg/day	No	No	>=250 mg/day	No	Yes	Yes	Yes	Yes
Visit 4	140	80	60		130	32	34	1.06	11_015	Week 12	23.8	130	10	86	-6	55	5	133	-3	24.3	-0.5	33.3	0.7	38	-6	0.88	0.18		11	Entered	62	Male	10NOV16	245	MF4637	<250 mg/day	No	No	>=250 mg/day	No	Yes	Yes	Yes	Yes
Visit 5	133	83	50		131.2	32	34	1.06	11_015	Week 24	24	130	3	86	-3	55	-5	133	-1.8	24.3	-0.3	33.3	0.7	38	-6	0.88	0.18	Losing Weight (0-5%)	11	Entered	62	Male	10NOV16	245	MF4637	<250 mg/day	No	No	>=250 mg/day	No	Yes	Yes	Yes	Yes
Visit 1	140	90	81	62	194.4				11_016	Screening	35.6	140		90		81		194.4		35.6									11	Screen Failure	55	Female							>=250 mg/day	Yes	No	No	No	No
Visit 1	110	80	84	65	226				11_017	Screening	37.6	107		82		81		226		37.6		46.5		50.5		0.92			11	Entered	32	Female	28NOV16	246	MF4637	<250 mg/day	No	No	<250 mg/day	No	Yes	Yes	Yes	Yes
Visit 2	107	82	81		226	50.5	46.5	0.92	11_017	Baseline	37.6	107		82		81		226		37.6		46.5		50.5		0.92			11	Entered	32	Female	28NOV16	246	MF4637	<250 mg/day	No	No	<250 mg/day	No	Yes	Yes	Yes	Yes
Visit 3	110	70	78		231.2	49.9	42.3	0.85	11_017	Week 6	38.5	107	3	82	-12	81	-3	226	5.2	37.6	0.9	46.5	-4.2	50.5	-0.6	0.92	-0.07		11	Entered	32	Female	28NOV16	246	MF4637	<250 mg/day	No	No	<250 mg/day	No	Yes	Yes	Yes	Yes
Visit 4	114	77	85		240	48	40	0.83	11_017	Week 12	40	107	7	82	-5	81	4	226	14	37.6	2.4	46.5	-6.5	50.5	-2.5	0.92	-0.09		11	Entered	32	Female	28NOV16	246	MF4637	<250 mg/day	No	No	<250 mg/day	No	Yes	Yes	Yes	Yes
Visit 5	124	82	80		241.2	44	33	0.75	11_017	Week 24	40.2	107	17	82	0	81	-1	226	15.2	37.6	2.6	46.5	-13.5	50.5	-6.5	0.92	-0.17	Gaining Weight	11	Entered	32	Female	28NOV16	246	MF4637	<250 mg/day	No	No	<250 mg/day	No	Yes	Yes	Yes	Yes
Visit 1	121	82	72	62	137				11_018	Screening	25.1	128		88		71		138		25.3		33		38.2		0.86			11	Entered	45	Female	29NOV16	248	Placebo	<250 mg/day	No	No	>=250 mg/day	No	Yes	Yes	Yes	Yes
Visit 2	128	88	71		138	38.2	33	0.86	11_018	Baseline	25.3	128		88		71		138		25.3		33		38.2		0.86			11	Entered	45	Female	29NOV16	248	Placebo	<250 mg/day	No	No	>=250 mg/day	No	Yes	Yes	Yes	Yes
Visit 3	114	81	71		135	36.5	31	0.85	11_018	Week 6	24.7	128	-14	88	-7	71	0	138	-3	25.3	-0.6	33	-2	38.2	-1.7	0.86	-0.01		11	Entered	45	Female	29NOV16	248	Placebo	<250 mg/day	No	No	>=250 mg/day	No	Yes	Yes	Yes	Yes
Visit 4	110	80	69		134.4	37.3	31	0.83	11_018	Week 12	24.6	128	-18	88	-8	71	-2	138	-3.6	25.3	-0.7	33	-2	38.2	-0.9	0.86	-0.03		11	Entered	45	Female	29NOV16	248	Placebo	<250 mg/day	No	No	>=250 mg/day	No	Yes	Yes	Yes	Yes
Visit 5	107	81	71		134.1	35	30	0.86	11_018	Week 24	24.5	128	-21	88	-7	71	0	138	-3.9	25.3	-0.8	33	-3	38.2	-3.2	0.86	0	Losing Weight (0-5%)	11	Entered	45	Female	29NOV16	248	Placebo	<250 mg/day	No	No	>=250 mg/day	No	Yes	Yes	Yes	Yes
Visit 1	150	75	79	63	195.8				12_001	Screening	34.7	147		76		61		194.3		34.4		44		43		1.02			12	Entered	66	Male	14OCT16	257	MF4637	>=250 mg/day	Yes	Yes	>=250 mg/day	No	Yes	Yes	Yes	Yes
Visit 2	147	76	61		194.3	43	44	1.02	12_001	Baseline	34.4	147		76		61		194.3		34.4		44		43		1.02			12	Entered	66	Male	14OCT16	257	MF4637	>=250 mg/day	Yes	Yes	>=250 mg/day	No	Yes	Yes	Yes	Yes
Visit 3	137	76	61		193.8	43	44	1.02	12_001	Week 6	34.4	147	-10	76	0	61	0	194.3	-0.5	34.4	0	44	0	43	0	1.02	0		12	Entered	66	Male	14OCT16	257	MF4637	>=250 mg/day	Yes	Yes	>=250 mg/day	No	Yes	Yes	Yes	Yes
Visit 4	119	69	71		194.6	43	44	1.02	12_001	Week 12	34.5	147	-28	76	-7	61	10	194.3	0.3	34.4	0.1	44	0	43	0	1.02	0		12	Entered	66	Male	14OCT16	257	MF4637	>=250 mg/day	Yes	Yes	>=250 mg/day	No	Yes	Yes	Yes	Yes
Visit 5	123	79	66		194	43	44	1.02	12_001	Week 24	34.4	147	-24	76	3	61	5	194.3	-0.3	34.4	0	44	0	43	0	1.02	0	Losing Weight (0-5%)	12	Entered	66	Male	14OCT16	257	MF4637	>=250 mg/day	Yes	Yes	>=250 mg/day	No	Yes	Yes	Yes	Yes
Visit 1	125	84	76	67	228				12_003	Screening	35.7	115		72		78		225.6		35.4		46		44		1.05			12	Entered	52	Male	11OCT16	138	Placebo	>=250 mg/day	Yes	No	>=250 mg/day	No	Yes	Yes	Yes	Yes
Visit 2	115	72	78		225.6	44	46	1.05	12_003	Baseline	35.4	115		72		78		225.6		35.4		46		44		1.05			12	Entered	52	Male	11OCT16	138	Placebo	>=250 mg/day	Yes	No	>=250 mg/day	No	Yes	Yes	Yes	Yes
Visit 3	115	70	74		221.6	43.8	45.6	1.04	12_003	Week 6	34.7	115	0	72	-2	78	-4	225.6	-4	35.4	-0.7	46	-0.4	44	-0.2	1.05	-0.01		12	Entered	52	Male	11OCT16	138	Placebo	>=250 mg/day	Yes	No	>=250 mg/day	No	Yes	Yes	Yes	Yes
Visit 4	127	77	74		222	43.8	45.6	1.04	12_003	Week 12	34.8	115	12	72	5	78	-4	225.6	-3.6	35.4	-0.6	46	-0.4	44	-0.2	1.05	-0.01		12	Entered	52	Male	11OCT16	138	Placebo	>=250 mg/day	Yes	No	>=250 mg/day	No	Yes	Yes	Yes	Yes
Visit 5	113	76	82		221.4	43.8	45.5	1.04	12_003	Week 24	34.7	115	-2	72	4	78	4	225.6	-4.2	35.4	-0.7	46	-0.5	44	-0.2	1.05	-0.01	Losing Weight (0-5%)	12	Entered	52	Male	11OCT16	138	Placebo	>=250 mg/day	Yes	No	>=250 mg/day	No	Yes	Yes	Yes	Yes
Visit 1	115	75	81	70	227				12_004	Screening	32.6	118		72		79		227		32.6		45.7		46.4		0.98			12	Entered	70	Male	22SEP16	133	Placebo	>=250 mg/day	Yes	Yes	>=250 mg/day	No	Yes	Yes	Yes	Yes
Visit 2	118	72	79		227	46.4	45.7	0.98	12_004	Baseline	32.6	118		72		79		227		32.6		45.7		46.4		0.98			12	Entered	70	Male	22SEP16	133	Placebo	>=250 mg/day	Yes	Yes	>=250 mg/day	No	Yes	Yes	Yes	Yes
Visit 3	116	79	85		232.1	46.4	45.9	0.99	12_004	Week 6	33.3	118	-2	72	7	79	6	227	5.1	32.6	0.7	45.7	0.2	46.4	0	0.98	0.01		12	Entered	70	Male	22SEP16	133	Placebo	>=250 mg/day	Yes	Yes	>=250 mg/day	No	Yes	Yes	Yes	Yes
Visit 4	108	70	81		233.4	46.5	46	0.99	12_004	Week 12	33.5	118	-10	72	-2	79	2	227	6.4	32.6	0.9	45.7	0.3	46.4	0.1	0.98	0.01		12	Entered	70	Male	22SEP16	133	Placebo	>=250 mg/day	Yes	Yes	>=250 mg/day	No	Yes	Yes	Yes	Yes
Visit 5	110	62	63		232.6	46.5	46	0.99	12_004	Week 24	33.4	118	-8	72	-10	79	-16	227	5.6	32.6	0.8	45.7	0.3	46.4	0.1	0.98	0.01	Gaining Weight	12	Entered	70	Male	22SEP16	133	Placebo	>=250 mg/day	Yes	Yes	>=250 mg/day	No	Yes	Yes	Yes	Yes
Visit 1	124	60	61	61	209.9				12_006	Screening	39.7	135		72		60		209.4		39.6		44.1		46.1		0.96			12	Entered	76	Female	22SEP16	132	MF4637	<250 mg/day	Yes	Yes	<250 mg/day	No	Yes	Yes	Yes	Yes
Visit 2	135	72	60		209.4	46.1	44.1	0.96	12_006	Baseline	39.6	135		72		60		209.4		39.6		44.1		46.1		0.96			12	Entered	76	Female	22SEP16	132	MF4637	<250 mg/day	Yes	Yes	<250 mg/day	No	Yes	Yes	Yes	Yes
Visit 3	111	60	63		209.1	46	44	0.96	12_006	Week 6	39.5	135	-24	72	-12	60	3	209.4	-0.3	39.6	-0.1	44.1	-0.1	46.1	-0.1	0.96	0		12	Entered	76	Female	22SEP16	132	MF4637	<250 mg/day	Yes	Yes	<250 mg/day	No	Yes	Yes	Yes	Yes
Visit 4	125	64	60		209.3	46	44	0.96	12_006	Week 12	39.6	135	-10	72	-8	60	0	209.4	-0.1	39.6	0	44.1	-0.1	46.1	-0.1	0.96	0		12	Entered	76	Female	22SEP16	132	MF4637	<250 mg/day	Yes	Yes	<250 mg/day	No	Yes	Yes	Yes	Yes
Visit 5	112	62	63		209	46	44	0.96	12_006	Week 24	39.5	135	-23	72	-10	60	3	209.4	-0.4	39.6	-0.1	44.1	-0.1	46.1	-0.1	0.96	0	Losing Weight (0-5%)	12	Entered	76	Female	22SEP16	132	MF4637	<250 mg/day	Yes	Yes	<250 mg/day	No	Yes	Yes	Yes	Yes
Visit 1	137	73	61	65	220				12_007	Screening	36.6	105		62		74		220.6		36.7		47		51		0.92			12	Entered	64	Female	30SEP16	134	Placebo	>=250 mg/day	No	Yes	>=250 mg/day	No	Yes	Yes	Yes	Yes
Visit 2	105	62	74		220.6	51	47	0.92	12_007	Baseline	36.7	105		62		74		220.6		36.7		47		51		0.92			12	Entered	64	Female	30SEP16	134	Placebo	>=250 mg/day	No	Yes	>=250 mg/day	No	Yes	Yes	Yes	Yes
Visit 3	125	62	74		228.8	51	47.4	0.93	12_007	Week 6	38.1	105	20	62	0	74	0	220.6	8.2	36.7	1.4	47	0.4	51	0	0.92	0.01		12	Entered	64	Female	30SEP16	134	Placebo	>=250 mg/day	No	Yes	>=250 mg/day	No	Yes	Yes	Yes	Yes
Visit 4	133	68	63		229.1	51	47.6	0.93	12_007	Week 12	38.2	105	28	62	6	74	-11	220.6	8.5	36.7	1.5	47	0.6	51	0	0.92	0.01		12	Entered	64	Female	30SEP16	134	Placebo	>=250 mg/day	No	Yes	>=250 mg/day	No	Yes	Yes	Yes	Yes
Visit 5	128	73	66		229.4	51	47.6	0.93	12_007	Week 24	38.2	105	23	62	11	74	-8	220.6	8.8	36.7	1.5	47	0.6	51	0	0.92	0.01	Gaining Weight	12	Entered	64	Female	30SEP16	134	Placebo	>=250 mg/day	No	Yes	>=250 mg/day	No	Yes	Yes	Yes	Yes
Visit 1	138	81	73	61	203				12_009	Screening	38.4	130		78		72		203.1		38.4		41		48		0.85			12	Early Termination	53	Female	26OCT16	260	MF4637	>=250 mg/day	Yes	Yes	>=250 mg/day	No	Yes	Yes	Yes	Yes
Visit 2	130	78	72		203.1	48	41	0.85	12_009	Baseline	38.4	130		78		72		203.1		38.4		41		48		0.85			12	Early Termination	53	Female	26OCT16	260	MF4637	>=250 mg/day	Yes	Yes	>=250 mg/day	No	Yes	Yes	Yes	Yes
Visit 3	143	80	81		200.1	48	41	0.85	12_009	Week 6	37.8	130	13	78	2	72	9	203.1	-3	38.4	-0.6	41	0	48	0	0.85	0		12	Early Termination	53	Female	26OCT16	260	MF4637	>=250 mg/day	Yes	Yes	>=250 mg/day	No	Yes	Yes	Yes	Yes
Early Termination	145	78	77	61	198	48	41	0.85	12_009	Early Termination	37.4	130	15	78	0	72	5	203.1	-5.1	38.4	-1	41	0	48	0	0.85	0		12	Early Termination	53	Female	26OCT16	260	MF4637	>=250 mg/day	Yes	Yes	>=250 mg/day	No	Yes	Yes	Yes	Yes
Visit 1	126	78	56	62	194				12_013	Screening	35.5	127		84		61		192.4		35.2		44		45		0.98			12	Entered	52	Female	30SEP16	137	MF4637	>=250 mg/day	No	Yes	>=250 mg/day	No	Yes	Yes	Yes	Yes
Visit 2	127	84	61		192.4	45	44	0.98	12_013	Baseline	35.2	127		84		61		192.4		35.2		44		45		0.98			12	Entered	52	Female	30SEP16	137	MF4637	>=250 mg/day	No	Yes	>=250 mg/day	No	Yes	Yes	Yes	Yes
Visit 3	130	83	61		190.1	45	44	0.98	12_013	Week 6	34.8	127	3	84	-1	61	0	192.4	-2.3	35.2	-0.4	44	0	45	0	0.98	0		12	Entered	52	Female	30SEP16	137	MF4637	>=250 mg/day	No	Yes	>=250 mg/day	No	Yes	Yes	Yes	Yes
Visit 4	133	80	60		190	45	44	0.98	12_013	Week 12	34.8	127	6	84	-4	61	-1	192.4	-2.4	35.2	-0.4	44	0	45	0	0.98	0		12	Entered	52	Female	30SEP16	137	MF4637	>=250 mg/day	No	Yes	>=250 mg/day	No	Yes	Yes	Yes	Yes
Visit 5	128	83	64		189.3	45	44	0.98	12_013	Week 24	34.7	127	1	84	-1	61	3	192.4	-3.1	35.2	-0.5	44	0	45	0	0.98	0	Losing Weight (0-5%)	12	Entered	52	Female	30SEP16	137	MF4637	>=250 mg/day	No	Yes	>=250 mg/day	No	Yes	Yes	Yes	Yes
Visit 1	140	81	73	59	130				12_014	Screening	26.3	119		64		79		128.6		26		35		39		0.9			12	Entered	66	Female	30SEP16	136	Placebo	>=250 mg/day	Yes	Yes	>=250 mg/day	No	Yes	Yes	Yes	Yes
Visit 2	119	64	79		128.6	39	35	0.9	12_014	Baseline	26	119		64		79		128.6		26		35		39		0.9			12	Entered	66	Female	30SEP16	136	Placebo	>=250 mg/day	Yes	Yes	>=250 mg/day	No	Yes	Yes	Yes	Yes
Visit 3	125	67	86		128	39	34.8	0.89	12_014	Week 6	25.9	119	6	64	3	79	7	128.6	-0.6	26	-0.1	35	-0.2	39	0	0.9	-0.01		12	Entered	66	Female	30SEP16	136	Placebo	>=250 mg/day	Yes	Yes	>=250 mg/day	No	Yes	Yes	Yes	Yes
Visit 4	132	68	87		128.6	39	35	0.9	12_014	Week 12	26	119	13	64	4	79	8	128.6	0	26	0	35	0	39	0	0.9	0		12	Entered	66	Female	30SEP16	136	Placebo	>=250 mg/day	Yes	Yes	>=250 mg/day	No	Yes	Yes	Yes	Yes
Visit 5	128	71	73		129	39	35	0.9	12_014	Week 24	26.1	119	9	64	7	79	-6	128.6	0.4	26	0.1	35	0	39	0	0.9	0	Gaining Weight	12	Entered	66	Female	30SEP16	136	Placebo	>=250 mg/day	Yes	Yes	>=250 mg/day	No	Yes	Yes	Yes	Yes
Visit 1	119	73	80	62	163				12_015	Screening	29.8	110		70		77		167		30.6		35.8		38		0.94			12	Early Termination	47	Female	30SEP16	135	MF4637	>=250 mg/day	Yes	Yes	>=250 mg/day	No	Yes	Yes	Yes	Yes
Visit 2	110	70	77		167	38	35.8	0.94	12_015	Baseline	30.6	110		70		77		167		30.6		35.8		38		0.94			12	Early Termination	47	Female	30SEP16	135	MF4637	>=250 mg/day	Yes	Yes	>=250 mg/day	No	Yes	Yes	Yes	Yes
Visit 3	115	71	80		166.4	38	35.6	0.94	12_015	Week 6	30.5	110	5	70	1	77	3	167	-0.6	30.6	-0.1	35.8	-0.2	38	0	0.94	0		12	Early Termination	47	Female	30SEP16	135	MF4637	>=250 mg/day	Yes	Yes	>=250 mg/day	No	Yes	Yes	Yes	Yes
Early Termination	108	68	72	62	165.1	38	35.5	0.93	12_015	Early Termination	30.2	110	-2	70	-2	77	-5	167	-1.9	30.6	-0.4	35.8	-0.3	38	0	0.94	-0.01		12	Early Termination	47	Female	30SEP16	135	MF4637	>=250 mg/day	Yes	Yes	>=250 mg/day	No	Yes	Yes	Yes	Yes
Visit 1	111	73	90	62	160.4				12_016	Screening	29.4	114		69		86		158.8		29.1		39		40		0.98			12	Entered	52	Female	05OCT16	103	MF4637	<250 mg/day	No	No	<250 mg/day	No	Yes	Yes	Yes	Yes
Visit 2	114	69	86		158.8	40	39	0.98	12_016	Baseline	29.1	114		69		86		158.8		29.1		39		40		0.98			12	Entered	52	Female	05OCT16	103	MF4637	<250 mg/day	No	No	<250 mg/day	No	Yes	Yes	Yes	Yes
Visit 3	120	69	86		155.2	40	38.2	0.96	12_016	Week 6	28.4	114	6	69	0	86	0	158.8	-3.6	29.1	-0.7	39	-0.8	40	0	0.98	-0.02		12	Entered	52	Female	05OCT16	103	MF4637	<250 mg/day	No	No	<250 mg/day	No	Yes	Yes	Yes	Yes
Visit 4	103	71	91		156.6	40	38.2	0.96	12_016	Week 12	28.7	114	-11	69	2	86	5	158.8	-2.2	29.1	-0.4	39	-0.8	40	0	0.98	-0.02		12	Entered	52	Female	05OCT16	103	MF4637	<250 mg/day	No	No	<250 mg/day	No	Yes	Yes	Yes	Yes
Visit 5	116	64	88		160.1	40	39	0.98	12_016	Week 24	29.3	114	2	69	-5	86	2	158.8	1.3	29.1	0.2	39	0	40	0	0.98	0	Gaining Weight	12	Entered	52	Female	05OCT16	103	MF4637	<250 mg/day	No	No	<250 mg/day	No	Yes	Yes	Yes	Yes
Visit 1	130	82	79	64	220				12_017	Screening	37.8	129		84		76		220.2		37.8		41		49		0.84			12	Entered	57	Female	05OCT16	100	Placebo	>=250 mg/day	Yes	Yes	>=250 mg/day	No	Yes	Yes	Yes	Yes
Visit 2	129	84	76		220.2	49	41	0.84	12_017	Baseline	37.8	129		84		76		220.2		37.8		41		49		0.84			12	Entered	57	Female	05OCT16	100	Placebo	>=250 mg/day	Yes	Yes	>=250 mg/day	No	Yes	Yes	Yes	Yes
Visit 3	110	68	80		220	49	41	0.84	12_017	Week 6	37.8	129	-19	84	-16	76	4	220.2	-0.2	37.8	0	41	0	49	0	0.84	0		12	Entered	57	Female	05OCT16	100	Placebo	>=250 mg/day	Yes	Yes	>=250 mg/day	No	Yes	Yes	Yes	Yes
Visit 4	104	69	80		220.2	49	41	0.84	12_017	Week 12	37.8	129	-25	84	-15	76	4	220.2	0	37.8	0	41	0	49	0	0.84	0		12	Entered	57	Female	05OCT16	100	Placebo	>=250 mg/day	Yes	Yes	>=250 mg/day	No	Yes	Yes	Yes	Yes
Visit 5	108	73	84		220.4	49	41	0.84	12_017	Week 24	37.9	129	-21	84	-11	76	8	220.2	0.2	37.8	0.1	41	0	49	0	0.84	0	Gaining Weight	12	Entered	57	Female	05OCT16	100	Placebo	>=250 mg/day	Yes	Yes	>=250 mg/day	No	Yes	Yes	Yes	Yes
Visit 1	108	65	72	70	245				12_019	Screening	35.2	110		70		76		244.5		35.1		51		43.1		1.18			12	Entered	53	Male	05OCT16	102	Placebo	<250 mg/day	Yes	Yes	<250 mg/day	No	Yes	Yes	Yes	Yes
Visit 2	110	70	76		244.5	43.1	51	1.18	12_019	Baseline	35.1	110		70		76		244.5		35.1		51		43.1		1.18			12	Entered	53	Male	05OCT16	102	Placebo	<250 mg/day	Yes	Yes	<250 mg/day	No	Yes	Yes	Yes	Yes
Visit 3	104	70	84		246.8	43.1	51.4	1.19	12_019	Week 6	35.4	110	-6	70	0	76	8	244.5	2.3	35.1	0.3	51	0.4	43.1	0	1.18	0.01		12	Entered	53	Male	05OCT16	102	Placebo	<250 mg/day	Yes	Yes	<250 mg/day	No	Yes	Yes	Yes	Yes
Visit 4	139	69	80		246.1	43	51.5	1.2	12_019	Week 12	35.3	110	29	70	-1	76	4	244.5	1.6	35.1	0.2	51	0.5	43.1	-0.1	1.18	0.02		12	Entered	53	Male	05OCT16	102	Placebo	<250 mg/day	Yes	Yes	<250 mg/day	No	Yes	Yes	Yes	Yes
Visit 5	116	81	74		245.3	43	51.5	1.2	12_019	Week 24	35.2	110	6	70	11	76	-2	244.5	0.8	35.1	0.1	51	0.5	43.1	-0.1	1.18	0.02	Gaining Weight	12	Entered	53	Male	05OCT16	102	Placebo	<250 mg/day	Yes	Yes	<250 mg/day	No	Yes	Yes	Yes	Yes
Visit 1	145	80	66	62	152.8				12_020	Screening	28	142		83		68		152.5		27.9		39		41		0.95			12	Entered	60	Female	05OCT16	101	MF4637	>=250 mg/day	Yes	Yes	>=250 mg/day	No	Yes	Yes	Yes	Yes
Visit 2	142	83	68		152.5	41	39	0.95	12_020	Baseline	27.9	142		83		68		152.5		27.9		39		41		0.95			12	Entered	60	Female	05OCT16	101	MF4637	>=250 mg/day	Yes	Yes	>=250 mg/day	No	Yes	Yes	Yes	Yes
Visit 3	128	73	78		152.1	41	39	0.95	12_020	Week 6	27.8	142	-14	83	-10	68	10	152.5	-0.4	27.9	-0.1	39	0	41	0	0.95	0		12	Entered	60	Female	05OCT16	101	MF4637	>=250 mg/day	Yes	Yes	>=250 mg/day	No	Yes	Yes	Yes	Yes
Visit 4	137	73	61		154.4	41	39	0.95	12_020	Week 12	28.3	142	-5	83	-10	68	-7	152.5	1.9	27.9	0.4	39	0	41	0	0.95	0		12	Entered	60	Female	05OCT16	101	MF4637	>=250 mg/day	Yes	Yes	>=250 mg/day	No	Yes	Yes	Yes	Yes
Visit 5	128	70	66		154	41	39	0.95	12_020	Week 24	28.2	142	-14	83	-13	68	-2	152.5	1.5	27.9	0.3	39	0	41	0	0.95	0	Gaining Weight	12	Entered	60	Female	05OCT16	101	MF4637	>=250 mg/day	Yes	Yes	>=250 mg/day	No	Yes	Yes	Yes	Yes
Visit 1	108	66	75	71	259.1				12_021	Screening	36.2	115		69		78		260.1		36.3		46		45		1.02			12	Entered	54	Male	11OCT16	254	MF4637	>=250 mg/day	Yes	Yes	>=250 mg/day	No	Yes	Yes	Yes	Yes
Visit 2	115	69	78		260.1	45	46	1.02	12_021	Baseline	36.3	115		69		78		260.1		36.3		46		45		1.02			12	Entered	54	Male	11OCT16	254	MF4637	>=250 mg/day	Yes	Yes	>=250 mg/day	No	Yes	Yes	Yes	Yes
Visit 3	116	66	74		263.2	45	46	1.02	12_021	Week 6	36.7	115	1	69	-3	78	-4	260.1	3.1	36.3	0.4	46	0	45	0	1.02	0		12	Entered	54	Male	11OCT16	254	MF4637	>=250 mg/day	Yes	Yes	>=250 mg/day	No	Yes	Yes	Yes	Yes
Visit 4	115	78	78		264.4	45	46	1.02	12_021	Week 12	36.9	115	0	69	9	78	0	260.1	4.3	36.3	0.6	46	0	45	0	1.02	0		12	Entered	54	Male	11OCT16	254	MF4637	>=250 mg/day	Yes	Yes	>=250 mg/day	No	Yes	Yes	Yes	Yes
Visit 5	121	66	73		263.2	45	46	1.02	12_021	Week 24	36.7	115	6	69	-3	78	-5	260.1	3.1	36.3	0.4	46	0	45	0	1.02	0	Gaining Weight	12	Entered	54	Male	11OCT16	254	MF4637	>=250 mg/day	Yes	Yes	>=250 mg/day	No	Yes	Yes	Yes	Yes
Visit 1	110	70	61	67	214.4				12_022	Screening	33.6	108		70		61		216.8		34		41		42		0.98			12	Entered	43	Male	12OCT16	253	Placebo	<250 mg/day	Yes	No	<250 mg/day	No	Yes	Yes	Yes	Yes
Visit 2	108	70	61		216.8	42	41	0.98	12_022	Baseline	34	108		70		61		216.8		34		41		42		0.98			12	Entered	43	Male	12OCT16	253	Placebo	<250 mg/day	Yes	No	<250 mg/day	No	Yes	Yes	Yes	Yes
Visit 3	114	76	63		215	42	41	0.98	12_022	Week 6	33.7	108	6	70	6	61	2	216.8	-1.8	34	-0.3	41	0	42	0	0.98	0		12	Entered	43	Male	12OCT16	253	Placebo	<250 mg/day	Yes	No	<250 mg/day	No	Yes	Yes	Yes	Yes
Visit 4	112	65	60		209	42	41	0.98	12_022	Week 12	32.8	108	4	70	-5	61	-1	216.8	-7.8	34	-1.2	41	0	42	0	0.98	0		12	Entered	43	Male	12OCT16	253	Placebo	<250 mg/day	Yes	No	<250 mg/day	No	Yes	Yes	Yes	Yes
Visit 5	103	66	64		208.4	42	40	0.95	12_022	Week 24	32.7	108	-5	70	-4	61	3	216.8	-8.4	34	-1.3	41	-1	42	0	0.98	-0.03	Losing Weight (0-5%)	12	Entered	43	Male	12OCT16	253	Placebo	<250 mg/day	Yes	No	<250 mg/day	No	Yes	Yes	Yes	Yes
Visit 1	124	86	77	65	237				12_024	Screening	39.5	121		79		72		236.8		39.4		44		49		0.9			12	Early Termination	41	Female	11OCT16	139	MF4637	>=250 mg/day	Yes	No	>=250 mg/day	No	Yes	Yes	Yes	Yes
Visit 2	121	79	72		236.8	49	44	0.9	12_024	Baseline	39.4	121		79		72		236.8		39.4		44		49		0.9			12	Early Termination	41	Female	11OCT16	139	MF4637	>=250 mg/day	Yes	No	>=250 mg/day	No	Yes	Yes	Yes	Yes
Visit 3	117	78	86		234.6	49	43.8	0.89	12_024	Week 6	39.1	121	-4	79	-1	72	14	236.8	-2.2	39.4	-0.3	44	-0.2	49	0	0.9	-0.01		12	Early Termination	41	Female	11OCT16	139	MF4637	>=250 mg/day	Yes	No	>=250 mg/day	No	Yes	Yes	Yes	Yes
Early Termination	109	77	79	65	235.2	49	43.8	0.89	12_024	Early Termination	39.2	121	-12	79	-2	72	7	236.8	-1.6	39.4	-0.2	44	-0.2	49	0	0.9	-0.01		12	Early Termination	41	Female	11OCT16	139	MF4637	>=250 mg/day	Yes	No	>=250 mg/day	No	Yes	Yes	Yes	Yes
Visit 1	132	82	68	63	170				12_025	Screening	30.1	140		78		78		170.4		30.2		44		43		1.02			12	Entered	73	Male	14OCT16	258	MF4637	>=250 mg/day	Yes	No	>=250 mg/day	No	Yes	Yes	Yes	Yes
Visit 2	140	78	78		170.4	43	44	1.02	12_025	Baseline	30.2	140		78		78		170.4		30.2		44		43		1.02			12	Entered	73	Male	14OCT16	258	MF4637	>=250 mg/day	Yes	No	>=250 mg/day	No	Yes	Yes	Yes	Yes
Visit 3	137	76	86		171.2	43	44	1.02	12_025	Week 6	30.4	140	-3	78	-2	78	8	170.4	0.8	30.2	0.2	44	0	43	0	1.02	0		12	Entered	73	Male	14OCT16	258	MF4637	>=250 mg/day	Yes	No	>=250 mg/day	No	Yes	Yes	Yes	Yes
Visit 4	132	74	91		177.2	43	44	1.02	12_025	Week 12	31.4	140	-8	78	-4	78	13	170.4	6.8	30.2	1.2	44	0	43	0	1.02	0		12	Entered	73	Male	14OCT16	258	MF4637	>=250 mg/day	Yes	No	>=250 mg/day	No	Yes	Yes	Yes	Yes
Visit 5	133	68	83		177.4	43	44	1.02	12_025	Week 24	31.5	140	-7	78	-10	78	5	170.4	7	30.2	1.3	44	0	43	0	1.02	0	Gaining Weight	12	Entered	73	Male	14OCT16	258	MF4637	>=250 mg/day	Yes	No	>=250 mg/day	No	Yes	Yes	Yes	Yes
Visit 1	140	78	65	60	181.2				12_027	Screening	35.4	119		70		64		177.8		34.8		39		43		0.91			12	Entered	56	Female	12OCT16	252	Placebo	<250 mg/day	No	Yes	<250 mg/day	No	Yes	Yes	Yes	Yes
Visit 2	119	70	64		177.8	43	39	0.91	12_027	Baseline	34.8	119		70		64		177.8		34.8		39		43		0.91			12	Entered	56	Female	12OCT16	252	Placebo	<250 mg/day	No	Yes	<250 mg/day	No	Yes	Yes	Yes	Yes
Visit 3	122	74	78		177.9	43	39	0.91	12_027	Week 6	34.8	119	3	70	4	64	14	177.8	0.1	34.8	0	39	0	43	0	0.91	0		12	Entered	56	Female	12OCT16	252	Placebo	<250 mg/day	No	Yes	<250 mg/day	No	Yes	Yes	Yes	Yes
Visit 4	119	72	62		169.6	43	39	0.91	12_027	Week 12	33.2	119	0	70	2	64	-2	177.8	-8.2	34.8	-1.6	39	0	43	0	0.91	0		12	Entered	56	Female	12OCT16	252	Placebo	<250 mg/day	No	Yes	<250 mg/day	No	Yes	Yes	Yes	Yes
Visit 5	126	75	73		170.1	43	39	0.91	12_027	Week 24	33.2	119	7	70	5	64	9	177.8	-7.7	34.8	-1.6	39	0	43	0	0.91	0	Losing Weight (0-5%)	12	Entered	56	Female	12OCT16	252	Placebo	<250 mg/day	No	Yes	<250 mg/day	No	Yes	Yes	Yes	Yes
Visit 1	136	84	87	56	130.4				12_028	Screening	29.3	145		82		79		131.2		29.4		40		39		1.03			12	Entered	71	Female	14OCT16	259	Placebo	<250 mg/day	Yes	Yes	<250 mg/day	No	Yes	Yes	Yes	Yes
Visit 2	145	82	79		131.2	39	40	1.03	12_028	Baseline	29.4	145		82		79		131.2		29.4		40		39		1.03			12	Entered	71	Female	14OCT16	259	Placebo	<250 mg/day	Yes	Yes	<250 mg/day	No	Yes	Yes	Yes	Yes
Visit 3	143	88	86		131.8	39	40	1.03	12_028	Week 6	29.6	145	-2	82	6	79	7	131.2	0.6	29.4	0.2	40	0	39	0	1.03	0		12	Entered	71	Female	14OCT16	259	Placebo	<250 mg/day	Yes	Yes	<250 mg/day	No	Yes	Yes	Yes	Yes
Visit 4	139	86	87		133.4	39	40	1.03	12_028	Week 12	29.9	145	-6	82	4	79	8	131.2	2.2	29.4	0.5	40	0	39	0	1.03	0		12	Entered	71	Female	14OCT16	259	Placebo	<250 mg/day	Yes	Yes	<250 mg/day	No	Yes	Yes	Yes	Yes
Visit 5	135	82	89		132.8	39	40	1.03	12_028	Week 24	29.8	145	-10	82	0	79	10	131.2	1.6	29.4	0.4	40	0	39	0	1.03	0	Gaining Weight	12	Entered	71	Female	14OCT16	259	Placebo	<250 mg/day	Yes	Yes	<250 mg/day	No	Yes	Yes	Yes	Yes
Visit 1	135	86	87	69	196.4				12_029	Screening	29	128		81		82		195.8		28.9		43		43		1			12	Entered	72	Male	12OCT16	256	Placebo	>=250 mg/day	Yes	Yes	>=250 mg/day	No	Yes	Yes	Yes	Yes
Visit 2	128	81	82		195.8	43	43	1	12_029	Baseline	28.9	128		81		82		195.8		28.9		43		43		1			12	Entered	72	Male	12OCT16	256	Placebo	>=250 mg/day	Yes	Yes	>=250 mg/day	No	Yes	Yes	Yes	Yes
Visit 3	122	65	84		194.4	43	43.3	1.01	12_029	Week 6	28.7	128	-6	81	-16	82	2	195.8	-1.4	28.9	-0.2	43	0.3	43	0	1	0.01		12	Entered	72	Male	12OCT16	256	Placebo	>=250 mg/day	Yes	Yes	>=250 mg/day	No	Yes	Yes	Yes	Yes
Visit 4	134	82	87		195.2	43	43.5	1.01	12_029	Week 12	28.9	128	6	81	1	82	5	195.8	-0.6	28.9	0	43	0.5	43	0	1	0.01		12	Entered	72	Male	12OCT16	256	Placebo	>=250 mg/day	Yes	Yes	>=250 mg/day	No	Yes	Yes	Yes	Yes
Visit 5	131	74	81		194.3	43	43.5	1.01	12_029	Week 24	28.7	128	3	81	-7	82	-1	195.8	-1.5	28.9	-0.2	43	0.5	43	0	1	0.01	Losing Weight (0-5%)	12	Entered	72	Male	12OCT16	256	Placebo	>=250 mg/day	Yes	Yes	>=250 mg/day	No	Yes	Yes	Yes	Yes
Visit 1	136	84	64	62	176.4				12_030	Screening	32.3	125		86		69		175.4		32.1		42.5		41.3		1.03			12	Entered	56	Male	12OCT16	255	MF4637	<250 mg/day	Yes	Yes	<250 mg/day	No	Yes	Yes	Yes	Yes
Visit 2	125	86	69		175.4	41.3	42.5	1.03	12_030	Baseline	32.1	125		86		69		175.4		32.1		42.5		41.3		1.03			12	Entered	56	Male	12OCT16	255	MF4637	<250 mg/day	Yes	Yes	<250 mg/day	No	Yes	Yes	Yes	Yes
Visit 3	128	87	72		176.4	41.3	42.5	1.03	12_030	Week 6	32.3	125	3	86	1	69	3	175.4	1	32.1	0.2	42.5	0	41.3	0	1.03	0		12	Entered	56	Male	12OCT16	255	MF4637	<250 mg/day	Yes	Yes	<250 mg/day	No	Yes	Yes	Yes	Yes
Visit 4	141	88	68		176	41.3	42.5	1.03	12_030	Week 12	32.2	125	16	86	2	69	-1	175.4	0.6	32.1	0.1	42.5	0	41.3	0	1.03	0		12	Entered	56	Male	12OCT16	255	MF4637	<250 mg/day	Yes	Yes	<250 mg/day	No	Yes	Yes	Yes	Yes
Visit 5	126	68	79		175.8	41	42.5	1.04	12_030	Week 24	32.2	125	1	86	-18	69	10	175.4	0.4	32.1	0.1	42.5	0	41.3	-0.3	1.03	0.01	Gaining Weight	12	Entered	56	Male	12OCT16	255	MF4637	<250 mg/day	Yes	Yes	<250 mg/day	No	Yes	Yes	Yes	Yes
Visit 1	130	85	78	61	178				12_032	Screening	33.7	134		81		76		177.6		33.6		45		44.5		1.01			12	Entered	67	Male	02NOV16	280	Placebo	>=250 mg/day	Yes	No	>=250 mg/day	No	Yes	Yes	Yes	Yes
Visit 2	134	81	76		177.6	44.5	45	1.01	12_032	Baseline	33.6	134		81		76		177.6		33.6		45		44.5		1.01			12	Entered	67	Male	02NOV16	280	Placebo	>=250 mg/day	Yes	No	>=250 mg/day	No	Yes	Yes	Yes	Yes
Visit 3	143	76	72		175.8	44.5	45	1.01	12_032	Week 6	33.2	134	9	81	-5	76	-4	177.6	-1.8	33.6	-0.4	45	0	44.5	0	1.01	0		12	Entered	67	Male	02NOV16	280	Placebo	>=250 mg/day	Yes	No	>=250 mg/day	No	Yes	Yes	Yes	Yes
Visit 4	142	67	73		175.1	44.5	45	1.01	12_032	Week 12	33.1	134	8	81	-14	76	-3	177.6	-2.5	33.6	-0.5	45	0	44.5	0	1.01	0		12	Entered	67	Male	02NOV16	280	Placebo	>=250 mg/day	Yes	No	>=250 mg/day	No	Yes	Yes	Yes	Yes
Visit 5	144	76	81		176	44.5	45	1.01	12_032	Week 24	33.3	134	10	81	-5	76	5	177.6	-1.6	33.6	-0.3	45	0	44.5	0	1.01	0	Losing Weight (0-5%)	12	Entered	67	Male	02NOV16	280	Placebo	>=250 mg/day	Yes	No	>=250 mg/day	No	Yes	Yes	Yes	Yes
Visit 1	124	63	69	63	173				12_033	Screening	30.7	113		65		66		172.1		30.5		36		41		0.88			12	Entered	72	Female	02NOV16	282	MF4637	>=250 mg/day	Yes	No	>=250 mg/day	No	Yes	Yes	Yes	Yes
Visit 2	113	65	66		172.1	41	36	0.88	12_033	Baseline	30.5	113		65		66		172.1		30.5		36		41		0.88			12	Entered	72	Female	02NOV16	282	MF4637	>=250 mg/day	Yes	No	>=250 mg/day	No	Yes	Yes	Yes	Yes
Visit 3	134	71	78		170.2	41	36	0.88	12_033	Week 6	30.2	113	21	65	6	66	12	172.1	-1.9	30.5	-0.3	36	0	41	0	0.88	0		12	Entered	72	Female	02NOV16	282	MF4637	>=250 mg/day	Yes	No	>=250 mg/day	No	Yes	Yes	Yes	Yes
Visit 4	114	60	62		169.8	41	36	0.88	12_033	Week 12	30.1	113	1	65	-5	66	-4	172.1	-2.3	30.5	-0.4	36	0	41	0	0.88	0		12	Entered	72	Female	02NOV16	282	MF4637	>=250 mg/day	Yes	No	>=250 mg/day	No	Yes	Yes	Yes	Yes
Visit 5	110	62	65		166	41	36.2	0.88	12_033	Week 24	29.4	113	-3	65	-3	66	-1	172.1	-6.1	30.5	-1.1	36	0.2	41	0	0.88	0	Losing Weight (0-5%)	12	Entered	72	Female	02NOV16	282	MF4637	>=250 mg/day	Yes	No	>=250 mg/day	No	Yes	Yes	Yes	Yes
Visit 1	127	79	74	67	245.2				12_034	Screening	38.4	130		76		72		244.6		38.3		46		52		0.88			12	Entered	55	Female	26OCT16	261	Placebo	>=250 mg/day	Yes	No	>=250 mg/day	No	Yes	Yes	Yes	No
Visit 2	130	76	72		244.6	52	46	0.88	12_034	Baseline	38.3	130		76		72		244.6		38.3		46		52		0.88			12	Entered	55	Female	26OCT16	261	Placebo	>=250 mg/day	Yes	No	>=250 mg/day	No	Yes	Yes	Yes	No
Visit 3	128	80	83		246.6	52	46	0.88	12_034	Week 6	38.7	130	-2	76	4	72	11	244.6	2	38.3	0.4	46	0	52	0	0.88	0		12	Entered	55	Female	26OCT16	261	Placebo	>=250 mg/day	Yes	No	>=250 mg/day	No	Yes	Yes	Yes	No
Visit 4	131	75	76		246.2	52	46	0.88	12_034	Week 12	38.6	130	1	76	-1	72	4	244.6	1.6	38.3	0.3	46	0	52	0	0.88	0		12	Entered	55	Female	26OCT16	261	Placebo	>=250 mg/day	Yes	No	>=250 mg/day	No	Yes	Yes	Yes	No
Visit 5	129	72	81		246.3	52	46	0.88	12_034	Week 24	38.6	130	-1	76	-4	72	9	244.6	1.7	38.3	0.3	46	0	52	0	0.88	0	Gaining Weight	12	Entered	55	Female	26OCT16	261	Placebo	>=250 mg/day	Yes	No	>=250 mg/day	No	Yes	Yes	Yes	No
Visit 1	150	80	70	69	249				12_038	Screening	36.8	126		81		72		242		35.8		46		44		1.05			12	Entered	62	Male	26OCT16	263	Placebo	>=250 mg/day	Yes	Yes	>=250 mg/day	No	Yes	Yes	Yes	Yes
Visit 2	126	81	72		242	44	46	1.05	12_038	Baseline	35.8	126		81		72		242		35.8		46		44		1.05			12	Entered	62	Male	26OCT16	263	Placebo	>=250 mg/day	Yes	Yes	>=250 mg/day	No	Yes	Yes	Yes	Yes
Visit 3	143	72	84		242.6	44	46	1.05	12_038	Week 6	35.9	126	17	81	-9	72	12	242	0.6	35.8	0.1	46	0	44	0	1.05	0		12	Entered	62	Male	26OCT16	263	Placebo	>=250 mg/day	Yes	Yes	>=250 mg/day	No	Yes	Yes	Yes	Yes
Visit 4	141	76	63		241.7	44	46	1.05	12_038	Week 12	35.7	126	15	81	-5	72	-9	242	-0.3	35.8	-0.1	46	0	44	0	1.05	0		12	Entered	62	Male	26OCT16	263	Placebo	>=250 mg/day	Yes	Yes	>=250 mg/day	No	Yes	Yes	Yes	Yes
Visit 5	138	84	67		240.2	44	46	1.05	12_038	Week 24	35.5	126	12	81	3	72	-5	242	-1.8	35.8	-0.3	46	0	44	0	1.05	0	Losing Weight (0-5%)	12	Entered	62	Male	26OCT16	263	Placebo	>=250 mg/day	Yes	Yes	>=250 mg/day	No	Yes	Yes	Yes	Yes
Visit 1	120	79	64	69	184.5				12_039	Screening	27.3	122		74		68		184.4		27.3		36		37		0.97			12	Entered	57	Male	26OCT16	262	MF4637	<250 mg/day	No	No	<250 mg/day	No	Yes	Yes	Yes	Yes
Visit 2	122	74	68		184.4	37	36	0.97	12_039	Baseline	27.3	122		74		68		184.4		27.3		36		37		0.97			12	Entered	57	Male	26OCT16	262	MF4637	<250 mg/day	No	No	<250 mg/day	No	Yes	Yes	Yes	Yes
Visit 3	132	85	67		180.6	37	36	0.97	12_039	Week 6	26.7	122	10	74	11	68	-1	184.4	-3.8	27.3	-0.6	36	0	37	0	0.97	0		12	Entered	57	Male	26OCT16	262	MF4637	<250 mg/day	No	No	<250 mg/day	No	Yes	Yes	Yes	Yes
Visit 4	133	80	66		179.6	37	36	0.97	12_039	Week 12	26.5	122	11	74	6	68	-2	184.4	-4.8	27.3	-0.8	36	0	37	0	0.97	0		12	Entered	57	Male	26OCT16	262	MF4637	<250 mg/day	No	No	<250 mg/day	No	Yes	Yes	Yes	Yes
Visit 5	128	73	77		179.3	37	36	0.97	12_039	Week 24	26.5	122	6	74	-1	68	9	184.4	-5.1	27.3	-0.8	36	0	37	0	0.97	0	Losing Weight (0-5%)	12	Entered	57	Male	26OCT16	262	MF4637	<250 mg/day	No	No	<250 mg/day	No	Yes	Yes	Yes	Yes
Visit 1	116	71	72	62	190				12_040	Screening	34.8	112		70		74		186.4		34.1		39		43		0.91			12	Entered	60	Female	10NOV16	292	MF4637	>=250 mg/day	Yes	Yes	>=250 mg/day	No	Yes	Yes	Yes	Yes
Visit 2	112	70	74		186.4	43	39	0.91	12_040	Baseline	34.1	112		70		74		186.4		34.1		39		43		0.91			12	Entered	60	Female	10NOV16	292	MF4637	>=250 mg/day	Yes	Yes	>=250 mg/day	No	Yes	Yes	Yes	Yes
Visit 3	110	75	67		187.3	43	39	0.91	12_040	Week 6	34.3	112	-2	70	5	74	-7	186.4	0.9	34.1	0.2	39	0	43	0	0.91	0		12	Entered	60	Female	10NOV16	292	MF4637	>=250 mg/day	Yes	Yes	>=250 mg/day	No	Yes	Yes	Yes	Yes
Visit 4	109	67	76		185.8	43	39	0.91	12_040	Week 12	34	112	-3	70	-3	74	2	186.4	-0.6	34.1	-0.1	39	0	43	0	0.91	0		12	Entered	60	Female	10NOV16	292	MF4637	>=250 mg/day	Yes	Yes	>=250 mg/day	No	Yes	Yes	Yes	Yes
Visit 5	110	63	77		185.6	43	39	0.91	12_040	Week 24	34	112	-2	70	-7	74	3	186.4	-0.8	34.1	-0.1	39	0	43	0	0.91	0	Losing Weight (0-5%)	12	Entered	60	Female	10NOV16	292	MF4637	>=250 mg/day	Yes	Yes	>=250 mg/day	No	Yes	Yes	Yes	Yes
Visit 1	120	76	86	64	145.6				12_041	Screening	25	124		86		82		144.8		24.9		32		34		0.94			12	Early Termination	54	Female	10NOV16	293	Placebo	>=250 mg/day	Yes	Yes	>=250 mg/day	No	Yes	Yes	Yes	Yes
Visit 2	124	86	82		144.8	34	32	0.94	12_041	Baseline	24.9	124		86		82		144.8		24.9		32		34		0.94			12	Early Termination	54	Female	10NOV16	293	Placebo	>=250 mg/day	Yes	Yes	>=250 mg/day	No	Yes	Yes	Yes	Yes
Early Termination	147	85	75	64	149.2	34	32	0.94	12_041	Early Termination	25.6	124	23	86	-1	82	-7	144.8	4.4	24.9	0.7	32	0	34	0	0.94	0		12	Early Termination	54	Female	10NOV16	293	Placebo	>=250 mg/day	Yes	Yes	>=250 mg/day	No	Yes	Yes	Yes	Yes
Visit 1	131	67	70	68	179.4				12_043	Screening	27.3	140		70		67		177.8		27.1		39		38		1.03			12	Entered	77	Male	03NOV16	283	MF4637	>=250 mg/day	Yes	Yes	>=250 mg/day	No	Yes	Yes	Yes	Yes
Visit 2	140	70	67		177.8	38	39	1.03	12_043	Baseline	27.1	140		70		67		177.8		27.1		39		38		1.03			12	Entered	77	Male	03NOV16	283	MF4637	>=250 mg/day	Yes	Yes	>=250 mg/day	No	Yes	Yes	Yes	Yes
Visit 3	123	61	64		173.6	38	38.5	1.01	12_043	Week 6	26.4	140	-17	70	-9	67	-3	177.8	-4.2	27.1	-0.7	39	-0.5	38	0	1.03	-0.02		12	Entered	77	Male	03NOV16	283	MF4637	>=250 mg/day	Yes	Yes	>=250 mg/day	No	Yes	Yes	Yes	Yes
Visit 4	132	62	61		172.8	38	38.5	1.01	12_043	Week 12	26.3	140	-8	70	-8	67	-6	177.8	-5	27.1	-0.8	39	-0.5	38	0	1.03	-0.02		12	Entered	77	Male	03NOV16	283	MF4637	>=250 mg/day	Yes	Yes	>=250 mg/day	No	Yes	Yes	Yes	Yes
Visit 5	128	74	66		171.4	38	38.5	1.01	12_043	Week 24	26.1	140	-12	70	4	67	-1	177.8	-6.4	27.1	-1	39	-0.5	38	0	1.03	-0.02	Losing Weight (0-5%)	12	Entered	77	Male	03NOV16	283	MF4637	>=250 mg/day	Yes	Yes	>=250 mg/day	No	Yes	Yes	Yes	Yes
Visit 1	116	64	80	67	175				12_044	Screening	27.4	124		71		73		178		27.9		38		37		1.03			12	Entered	66	Male	02NOV16	281	Placebo	>=250 mg/day	Yes	Yes	>=250 mg/day	No	Yes	Yes	Yes	Yes
Visit 2	124	71	73		178	37	38	1.03	12_044	Baseline	27.9	124		71		73		178		27.9		38		37		1.03			12	Entered	66	Male	02NOV16	281	Placebo	>=250 mg/day	Yes	Yes	>=250 mg/day	No	Yes	Yes	Yes	Yes
Visit 3	119	63	71		173	37	37.6	1.02	12_044	Week 6	27.1	124	-5	71	-8	73	-2	178	-5	27.9	-0.8	38	-0.4	37	0	1.03	-0.01		12	Entered	66	Male	02NOV16	281	Placebo	>=250 mg/day	Yes	Yes	>=250 mg/day	No	Yes	Yes	Yes	Yes
Visit 4	123	63	65		172.8	37	37.5	1.01	12_044	Week 12	27.1	124	-1	71	-8	73	-8	178	-5.2	27.9	-0.8	38	-0.5	37	0	1.03	-0.02		12	Entered	66	Male	02NOV16	281	Placebo	>=250 mg/day	Yes	Yes	>=250 mg/day	No	Yes	Yes	Yes	Yes
Visit 5	126	71	68		173.3	37	37.5	1.01	12_044	Week 24	27.2	124	2	71	0	73	-5	178	-4.7	27.9	-0.7	38	-0.5	37	0	1.03	-0.02	Losing Weight (0-5%)	12	Entered	66	Male	02NOV16	281	Placebo	>=250 mg/day	Yes	Yes	>=250 mg/day	No	Yes	Yes	Yes	Yes
Visit 1	128	66	60	69	191.4				12_046	Screening	28.3	133		68		62		189.6		28		41		40		1.02			12	Entered	75	Male	03NOV16	284	MF4637	>=250 mg/day	Yes	Yes	>=250 mg/day	No	Yes	Yes	Yes	Yes
Visit 2	133	68	62		189.6	40	41	1.02	12_046	Baseline	28	133		68		62		189.6		28		41		40		1.02			12	Entered	75	Male	03NOV16	284	MF4637	>=250 mg/day	Yes	Yes	>=250 mg/day	No	Yes	Yes	Yes	Yes
Visit 3	133	65	71		188.6	41	42	1.02	12_046	Week 6	27.9	133	0	68	-3	62	9	189.6	-1	28	-0.1	41	1	40	1	1.02	0		12	Entered	75	Male	03NOV16	284	MF4637	>=250 mg/day	Yes	Yes	>=250 mg/day	No	Yes	Yes	Yes	Yes
Visit 4	120	61	60		188.4	41	42	1.02	12_046	Week 12	27.8	133	-13	68	-7	62	-2	189.6	-1.2	28	-0.2	41	1	40	1	1.02	0		12	Entered	75	Male	03NOV16	284	MF4637	>=250 mg/day	Yes	Yes	>=250 mg/day	No	Yes	Yes	Yes	Yes
Visit 5	119	60	62		188.2	41	42	1.02	12_046	Week 24	27.8	133	-14	68	-8	62	0	189.6	-1.4	28	-0.2	41	1	40	1	1.02	0	Losing Weight (0-5%)	12	Entered	75	Male	03NOV16	284	MF4637	>=250 mg/day	Yes	Yes	>=250 mg/day	No	Yes	Yes	Yes	Yes
Visit 1	135	78	63	70	242				12_047	Screening	34.8	146		86		67		246		35.3		44.5		46.2		0.96			12	Screen Failure	46	Male							<250 mg/day	Yes	No	No	No	No
Visit 2	146	86	67		246	46.2	44.5	0.96	12_047	Baseline	35.3	146		86		67		246		35.3		44.5		46.2		0.96			12	Screen Failure	46	Male							<250 mg/day	Yes	No	No	No	No
Visit 1	137	81	60	62	137				12_048	Screening	25.1	128		78		64		135.4		24.8		28		35		0.8			12	Entered	63	Female	03NOV16	285	MF4637	<250 mg/day	Yes	No	<250 mg/day	No	Yes	Yes	Yes	Yes
Visit 2	128	78	64		135.4	35	28	0.8	12_048	Baseline	24.8	128		78		64		135.4		24.8		28		35		0.8			12	Entered	63	Female	03NOV16	285	MF4637	<250 mg/day	Yes	No	<250 mg/day	No	Yes	Yes	Yes	Yes
Visit 3	134	80	77		131.6	35	28	0.8	12_048	Week 6	24.1	128	6	78	2	64	13	135.4	-3.8	24.8	-0.7	28	0	35	0	0.8	0		12	Entered	63	Female	03NOV16	285	MF4637	<250 mg/day	Yes	No	<250 mg/day	No	Yes	Yes	Yes	Yes
Visit 4	137	84	60		132	35	28	0.8	12_048	Week 12	24.2	128	9	78	6	64	-4	135.4	-3.4	24.8	-0.6	28	0	35	0	0.8	0		12	Entered	63	Female	03NOV16	285	MF4637	<250 mg/day	Yes	No	<250 mg/day	No	Yes	Yes	Yes	Yes
Visit 5	132	76	65		131.6	35	28	0.8	12_048	Week 24	24.1	128	4	78	-2	64	1	135.4	-3.8	24.8	-0.7	28	0	35	0	0.8	0	Losing Weight (0-5%)	12	Entered	63	Female	03NOV16	285	MF4637	<250 mg/day	Yes	No	<250 mg/day	No	Yes	Yes	Yes	Yes
Visit 1	128	66	94	63	219.8				12_054	Screening	39	116		66		98		220.4		39.1		47		48.5		0.97			12	Entered	60	Female	03NOV16	286	Placebo	>=250 mg/day	Yes	Yes	>=250 mg/day	No	Yes	Yes	Yes	Yes
Visit 2	116	66	98		220.4	48.5	47	0.97	12_054	Baseline	39.1	116		66		98		220.4		39.1		47		48.5		0.97			12	Entered	60	Female	03NOV16	286	Placebo	>=250 mg/day	Yes	Yes	>=250 mg/day	No	Yes	Yes	Yes	Yes
Visit 3	103	67	89		220.8	48.5	47.4	0.98	12_054	Week 6	39.1	116	-13	66	1	98	-9	220.4	0.4	39.1	0	47	0.4	48.5	0	0.97	0.01		12	Entered	60	Female	03NOV16	286	Placebo	>=250 mg/day	Yes	Yes	>=250 mg/day	No	Yes	Yes	Yes	Yes
Visit 4	106	70	81		220.4	48.5	47	0.97	12_054	Week 12	39.1	116	-10	66	4	98	-17	220.4	0	39.1	0	47	0	48.5	0	0.97	0		12	Entered	60	Female	03NOV16	286	Placebo	>=250 mg/day	Yes	Yes	>=250 mg/day	No	Yes	Yes	Yes	Yes
Visit 5	113	72	92		221	48.5	47	0.97	12_054	Week 24	39.2	116	-3	66	6	98	-6	220.4	0.6	39.1	0.1	47	0	48.5	0	0.97	0	Gaining Weight	12	Entered	60	Female	03NOV16	286	Placebo	>=250 mg/day	Yes	Yes	>=250 mg/day	No	Yes	Yes	Yes	Yes
Visit 1	142	84	78	69	261				12_056	Screening	38.6	139		84		76		256		37.8		49		45		1.09			12	Early Termination	61	Male	03NOV16	287	Placebo	<250 mg/day	Yes	Yes	<250 mg/day	No	Yes	Yes	Yes	Yes
Visit 2	139	84	76		256	45	49	1.09	12_056	Baseline	37.8	139		84		76		256		37.8		49		45		1.09			12	Early Termination	61	Male	03NOV16	287	Placebo	<250 mg/day	Yes	Yes	<250 mg/day	No	Yes	Yes	Yes	Yes
Early Termination	113	69	74	69	248.2	45	48.8	1.08	12_056	Early Termination	36.7	139	-26	84	-15	76	-2	256	-7.8	37.8	-1.1	49	-0.2	45	0	1.09	-0.01		12	Early Termination	61	Male	03NOV16	287	Placebo	<250 mg/day	Yes	Yes	<250 mg/day	No	Yes	Yes	Yes	Yes
Visit 1	140	81	68	60	149.4				12_057	Screening	29.2	145		80		72		150.4		29.4		35		37		0.95			12	Entered	65	Female	10NOV16	294	Placebo	<250 mg/day	Yes	No	<250 mg/day	No	Yes	Yes	Yes	Yes
Visit 2	145	80	72		150.4	37	35	0.95	12_057	Baseline	29.4	145		80		72		150.4		29.4		35		37		0.95			12	Entered	65	Female	10NOV16	294	Placebo	<250 mg/day	Yes	No	<250 mg/day	No	Yes	Yes	Yes	Yes
Visit 3	143	82	76		147.8	37	35	0.95	12_057	Week 6	28.9	145	-2	80	2	72	4	150.4	-2.6	29.4	-0.5	35	0	37	0	0.95	0		12	Entered	65	Female	10NOV16	294	Placebo	<250 mg/day	Yes	No	<250 mg/day	No	Yes	Yes	Yes	Yes
Visit 4	141	84	76		148.1	37	35	0.95	12_057	Week 12	28.9	145	-4	80	4	72	4	150.4	-2.3	29.4	-0.5	35	0	37	0	0.95	0		12	Entered	65	Female	10NOV16	294	Placebo	<250 mg/day	Yes	No	<250 mg/day	No	Yes	Yes	Yes	Yes
Visit 5	139	83	79		148	37	35	0.95	12_057	Week 24	28.9	145	-6	80	3	72	7	150.4	-2.4	29.4	-0.5	35	0	37	0	0.95	0	Losing Weight (0-5%)	12	Entered	65	Female	10NOV16	294	Placebo	<250 mg/day	Yes	No	<250 mg/day	No	Yes	Yes	Yes	Yes
Visit 1	110	62	68	64	207				12_058	Screening	35.6	126		79		74		207.8		35.7		44		43		1.02			12	Entered	68	Male	16NOV16	181	Placebo	<250 mg/day	Yes	Yes	<250 mg/day	No	Yes	Yes	Yes	Yes
Visit 2	126	79	74		207.8	43	44	1.02	12_058	Baseline	35.7	126		79		74		207.8		35.7		44		43		1.02			12	Entered	68	Male	16NOV16	181	Placebo	<250 mg/day	Yes	Yes	<250 mg/day	No	Yes	Yes	Yes	Yes
Visit 3	136	66	63		208.2	43	44.4	1.03	12_058	Week 6	35.8	126	10	79	-13	74	-11	207.8	0.4	35.7	0.1	44	0.4	43	0	1.02	0.01		12	Entered	68	Male	16NOV16	181	Placebo	<250 mg/day	Yes	Yes	<250 mg/day	No	Yes	Yes	Yes	Yes
Visit 4	135	71	67		209	43	44.5	1.03	12_058	Week 12	35.9	126	9	79	-8	74	-7	207.8	1.2	35.7	0.2	44	0.5	43	0	1.02	0.01		12	Entered	68	Male	16NOV16	181	Placebo	<250 mg/day	Yes	Yes	<250 mg/day	No	Yes	Yes	Yes	Yes
Visit 5	139	77	72		209.3	43	44.5	1.03	12_058	Week 24	36	126	13	79	-2	74	-2	207.8	1.5	35.7	0.3	44	0.5	43	0	1.02	0.01	Gaining Weight	12	Entered	68	Male	16NOV16	181	Placebo	<250 mg/day	Yes	Yes	<250 mg/day	No	Yes	Yes	Yes	Yes
Visit 1	132	92	73	69	230				12_062	Screening	34	130		89		72		231.2		34.2		44		40		1.1			12	Entered	53	Male	16NOV16	295	MF4637	<250 mg/day	Yes	No	<250 mg/day	No	Yes	Yes	Yes	Yes
Visit 2	130	89	72		231.2	40	44	1.1	12_062	Baseline	34.2	130		89		72		231.2		34.2		44		40		1.1			12	Entered	53	Male	16NOV16	295	MF4637	<250 mg/day	Yes	No	<250 mg/day	No	Yes	Yes	Yes	Yes
Visit 3	128	80	90		230.6	40	44	1.1	12_062	Week 6	34.1	130	-2	89	-9	72	18	231.2	-0.6	34.2	-0.1	44	0	40	0	1.1	0		12	Entered	53	Male	16NOV16	295	MF4637	<250 mg/day	Yes	No	<250 mg/day	No	Yes	Yes	Yes	Yes
Visit 4	138	88	74		227.9	40	44	1.1	12_062	Week 12	33.7	130	8	89	-1	72	2	231.2	-3.3	34.2	-0.5	44	0	40	0	1.1	0		12	Entered	53	Male	16NOV16	295	MF4637	<250 mg/day	Yes	No	<250 mg/day	No	Yes	Yes	Yes	Yes
Visit 5	132	76	79		228.3	40	44	1.1	12_062	Week 24	33.7	130	2	89	-13	72	7	231.2	-2.9	34.2	-0.5	44	0	40	0	1.1	0	Losing Weight (0-5%)	12	Entered	53	Male	16NOV16	295	MF4637	<250 mg/day	Yes	No	<250 mg/day	No	Yes	Yes	Yes	Yes
Visit 1	128	64	66	63	172.8				12_065	Screening	30.6	128		76		72		173.2		30.7		36		41		0.88			12	Entered	76	Female	16NOV16	182	MF4637	<250 mg/day	Yes	Yes	<250 mg/day	No	Yes	Yes	Yes	Yes
Visit 2	128	76	72		173.2	41	36	0.88	12_065	Baseline	30.7	128		76		72		173.2		30.7		36		41		0.88			12	Entered	76	Female	16NOV16	182	MF4637	<250 mg/day	Yes	Yes	<250 mg/day	No	Yes	Yes	Yes	Yes
Visit 3	123	62	86		174.3	41	36	0.88	12_065	Week 6	30.9	128	-5	76	-14	72	14	173.2	1.1	30.7	0.2	36	0	41	0	0.88	0		12	Entered	76	Female	16NOV16	182	MF4637	<250 mg/day	Yes	Yes	<250 mg/day	No	Yes	Yes	Yes	Yes
Visit 4	135	71	62		175.1	41	36	0.88	12_065	Week 12	31	128	7	76	-5	72	-10	173.2	1.9	30.7	0.3	36	0	41	0	0.88	0		12	Entered	76	Female	16NOV16	182	MF4637	<250 mg/day	Yes	Yes	<250 mg/day	No	Yes	Yes	Yes	Yes
Visit 5	117	69	70		175	41	35.5	0.87	12_065	Week 24	31	128	-11	76	-7	72	-2	173.2	1.8	30.7	0.3	36	-0.5	41	0	0.88	-0.01	Gaining Weight	12	Entered	76	Female	16NOV16	182	MF4637	<250 mg/day	Yes	Yes	<250 mg/day	No	Yes	Yes	Yes	Yes
Visit 1	124	60	61	59	151				12_067	Screening	30.5	130		73		62		152.1		30.7		39		42		0.93			12	Entered	72	Female	16NOV16	180	MF4637	>=250 mg/day	Yes	Yes	>=250 mg/day	No	Yes	Yes	Yes	Yes
Visit 2	130	73	62		152.1	42	39	0.93	12_067	Baseline	30.7	130		73		62		152.1		30.7		39		42		0.93			12	Entered	72	Female	16NOV16	180	MF4637	>=250 mg/day	Yes	Yes	>=250 mg/day	No	Yes	Yes	Yes	Yes
Visit 3	131	60	74		152.4	42	39	0.93	12_067	Week 6	30.8	130	1	73	-13	62	12	152.1	0.3	30.7	0.1	39	0	42	0	0.93	0		12	Entered	72	Female	16NOV16	180	MF4637	>=250 mg/day	Yes	Yes	>=250 mg/day	No	Yes	Yes	Yes	Yes
Visit 4	114	60	62		152.7	42	39	0.93	12_067	Week 12	30.9	130	-16	73	-13	62	0	152.1	0.6	30.7	0.2	39	0	42	0	0.93	0		12	Entered	72	Female	16NOV16	180	MF4637	>=250 mg/day	Yes	Yes	>=250 mg/day	No	Yes	Yes	Yes	Yes
Visit 5	118	63	67		152.8	42	39	0.93	12_067	Week 24	30.9	130	-12	73	-10	62	5	152.1	0.7	30.7	0.2	39	0	42	0	0.93	0	Gaining Weight	12	Entered	72	Female	16NOV16	180	MF4637	>=250 mg/day	Yes	Yes	>=250 mg/day	No	Yes	Yes	Yes	Yes
Visit 1	131	70	66	60	138				12_068	Screening	27	137		73		74		139.2		27.2		34		39		0.87			12	Entered	78	Female	21NOV16	183	Placebo	>=250 mg/day	Yes	Yes	>=250 mg/day	No	Yes	Yes	Yes	Yes
Visit 2	137	73	74		139.2	39	34	0.87	12_068	Baseline	27.2	137		73		74		139.2		27.2		34		39		0.87			12	Entered	78	Female	21NOV16	183	Placebo	>=250 mg/day	Yes	Yes	>=250 mg/day	No	Yes	Yes	Yes	Yes
Visit 3	138	66	60		140.8	39	34	0.87	12_068	Week 6	27.5	137	1	73	-7	74	-14	139.2	1.6	27.2	0.3	34	0	39	0	0.87	0		12	Entered	78	Female	21NOV16	183	Placebo	>=250 mg/day	Yes	Yes	>=250 mg/day	No	Yes	Yes	Yes	Yes
Visit 4	136	63	60		140.1	39	34	0.87	12_068	Week 12	27.4	137	-1	73	-10	74	-14	139.2	0.9	27.2	0.2	34	0	39	0	0.87	0		12	Entered	78	Female	21NOV16	183	Placebo	>=250 mg/day	Yes	Yes	>=250 mg/day	No	Yes	Yes	Yes	Yes
Visit 5	137	71	65		140	39	34	0.87	12_068	Week 24	27.4	137	0	73	-2	74	-9	139.2	0.8	27.2	0.2	34	0	39	0	0.87	0	Gaining Weight	12	Entered	78	Female	21NOV16	183	Placebo	>=250 mg/day	Yes	Yes	>=250 mg/day	No	Yes	Yes	Yes	Yes
Visit 1	118	80	62	63	171.2				13_001	Screening	30.4	110		75		65		172		30.5		35.5		43		0.83			13	Entered	42	Female	28OCT16	162	Placebo	<250 mg/day	No	No	>=250 mg/day	No	Yes	Yes	Yes	Yes
Visit 2	110	75	65		172	43	35.5	0.83	13_001	Baseline	30.5	110		75		65		172		30.5		35.5		43		0.83			13	Entered	42	Female	28OCT16	162	Placebo	<250 mg/day	No	No	>=250 mg/day	No	Yes	Yes	Yes	Yes
Visit 3	115	78	68		175	44	36.5	0.83	13_001	Week 6	31	110	5	75	3	65	3	172	3	30.5	0.5	35.5	1	43	1	0.83	0		13	Entered	42	Female	28OCT16	162	Placebo	<250 mg/day	No	No	>=250 mg/day	No	Yes	Yes	Yes	Yes
Visit 4	118	79	65		172	43	35	0.81	13_001	Week 12	30.5	110	8	75	4	65	0	172	0	30.5	0	35.5	-0.5	43	0	0.83	-0.02		13	Entered	42	Female	28OCT16	162	Placebo	<250 mg/day	No	No	>=250 mg/day	No	Yes	Yes	Yes	Yes
Visit 5	115	78	69		175	43	36	0.84	13_001	Week 24	31	110	5	75	3	65	4	172	3	30.5	0.5	35.5	0.5	43	0	0.83	0.01	Gaining Weight	13	Entered	42	Female	28OCT16	162	Placebo	<250 mg/day	No	No	>=250 mg/day	No	Yes	Yes	Yes	Yes
Visit 1	138	66	61	61	155.2				13_002	Screening	29.4	133		73		68		152.5		28.8		37		44.5		0.83			13	Entered	67	Female	20OCT16	204	MF4637	<250 mg/day	Yes	Yes	<250 mg/day	No	Yes	Yes	Yes	Yes
Visit 2	133	73	68		152.5	44.5	37	0.83	13_002	Baseline	28.8	133		73		68		152.5		28.8		37		44.5		0.83			13	Entered	67	Female	20OCT16	204	MF4637	<250 mg/day	Yes	Yes	<250 mg/day	No	Yes	Yes	Yes	Yes
Visit 3	135	79	70		155	44	40	0.91	13_002	Week 6	29.3	133	2	73	6	68	2	152.5	2.5	28.8	0.5	37	3	44.5	-0.5	0.83	0.08		13	Entered	67	Female	20OCT16	204	MF4637	<250 mg/day	Yes	Yes	<250 mg/day	No	Yes	Yes	Yes	Yes
Visit 4	125	63	63		155	44	41	0.93	13_002	Week 12	29.3	133	-8	73	-10	68	-5	152.5	2.5	28.8	0.5	37	4	44.5	-0.5	0.83	0.1		13	Entered	67	Female	20OCT16	204	MF4637	<250 mg/day	Yes	Yes	<250 mg/day	No	Yes	Yes	Yes	Yes
Visit 5	127	62	65		153.3	44	40	0.91	13_002	Week 24	29	133	-6	73	-11	68	-3	152.5	0.8	28.8	0.2	37	3	44.5	-0.5	0.83	0.08	Gaining Weight	13	Entered	67	Female	20OCT16	204	MF4637	<250 mg/day	Yes	Yes	<250 mg/day	No	Yes	Yes	Yes	Yes
Visit 1	151	89	60	59	147.9				13_003	Screening	29.9	143		90		83		149.5		30.2		38		43		0.88			13	Entered	65	Female	20OCT16	205	Placebo	<250 mg/day	Yes	Yes	<250 mg/day	No	Yes	Yes	Yes	Yes
Visit 2	143	90	83		149.5	43	38	0.88	13_003	Baseline	30.2	143		90		83		149.5		30.2		38		43		0.88			13	Entered	65	Female	20OCT16	205	Placebo	<250 mg/day	Yes	Yes	<250 mg/day	No	Yes	Yes	Yes	Yes
Visit 3	138	92	83		149	43	38	0.88	13_003	Week 6	30.1	143	-5	90	2	83	0	149.5	-0.5	30.2	-0.1	38	0	43	0	0.88	0		13	Entered	65	Female	20OCT16	205	Placebo	<250 mg/day	Yes	Yes	<250 mg/day	No	Yes	Yes	Yes	Yes
Visit 4	144	85	69		150	43	39	0.91	13_003	Week 12	30.3	143	1	90	-5	83	-14	149.5	0.5	30.2	0.1	38	1	43	0	0.88	0.03		13	Entered	65	Female	20OCT16	205	Placebo	<250 mg/day	Yes	Yes	<250 mg/day	No	Yes	Yes	Yes	Yes
Visit 5	148	85	68		155	43	40	0.93	13_003	Week 24	31.3	143	5	90	-5	83	-15	149.5	5.5	30.2	1.1	38	2	43	0	0.88	0.05	Gaining Weight	13	Entered	65	Female	20OCT16	205	Placebo	<250 mg/day	Yes	Yes	<250 mg/day	No	Yes	Yes	Yes	Yes
Visit 1	117	79	65	62	170.8				13_004	Screening	31.3	110		79		75		174.5		31.9		40		44.5		0.9			13	Entered	69	Female	20OCT16	206	MF4637	<250 mg/day	No	Yes	<250 mg/day	No	Yes	Yes	Yes	Yes
Visit 2	110	79	75		174.5	44.5	40	0.9	13_004	Baseline	31.9	110		79		75		174.5		31.9		40		44.5		0.9			13	Entered	69	Female	20OCT16	206	MF4637	<250 mg/day	No	Yes	<250 mg/day	No	Yes	Yes	Yes	Yes
Visit 3	121	85	72		177	46	43.5	0.95	13_004	Week 6	32.4	110	11	79	6	75	-3	174.5	2.5	31.9	0.5	40	3.5	44.5	1.5	0.9	0.05		13	Entered	69	Female	20OCT16	206	MF4637	<250 mg/day	No	Yes	<250 mg/day	No	Yes	Yes	Yes	Yes
Visit 4	120	79	69		175	45	41.5	0.92	13_004	Week 12	32	110	10	79	0	75	-6	174.5	0.5	31.9	0.1	40	1.5	44.5	0.5	0.9	0.02		13	Entered	69	Female	20OCT16	206	MF4637	<250 mg/day	No	Yes	<250 mg/day	No	Yes	Yes	Yes	Yes
Visit 5	120	84	70		176	45	42	0.93	13_004	Week 24	32.2	110	10	79	5	75	-5	174.5	1.5	31.9	0.3	40	2	44.5	0.5	0.9	0.03	Gaining Weight	13	Entered	69	Female	20OCT16	206	MF4637	<250 mg/day	No	Yes	<250 mg/day	No	Yes	Yes	Yes	Yes
Visit 1	122	78	75	65	188.9				13_005	Screening	31.5	119		75		69		192		32		42		40		1.05			13	Entered	48	Male	10NOV16	276	MF4637	<250 mg/day	No	No	<250 mg/day	No	Yes	Yes	Yes	Yes
Visit 2	119	75	69		192	40	42	1.05	13_005	Baseline	32	119		75		69		192		32		42		40		1.05			13	Entered	48	Male	10NOV16	276	MF4637	<250 mg/day	No	No	<250 mg/day	No	Yes	Yes	Yes	Yes
Visit 3	123	80	72		193	40	42	1.05	13_005	Week 6	32.1	119	4	75	5	69	3	192	1	32	0.1	42	0	40	0	1.05	0		13	Entered	48	Male	10NOV16	276	MF4637	<250 mg/day	No	No	<250 mg/day	No	Yes	Yes	Yes	Yes
Visit 4	120	82	70		192	40	42	1.05	13_005	Week 12	32	119	1	75	7	69	1	192	0	32	0	42	0	40	0	1.05	0		13	Entered	48	Male	10NOV16	276	MF4637	<250 mg/day	No	No	<250 mg/day	No	Yes	Yes	Yes	Yes
Visit 5	120	79	70		192	42	40	0.95	13_005	Week 24	32	119	1	75	4	69	1	192	0	32	0	42	-2	40	2	1.05	-0.1	Losing Weight (0-5%)	13	Entered	48	Male	10NOV16	276	MF4637	<250 mg/day	No	No	<250 mg/day	No	Yes	Yes	Yes	Yes
Visit 1	120	74	74	71	231				13_006	Screening	32.2	120		79		67		231		32.2		44		46		0.96			13	Entered	40	Male	28OCT16	160	MF4637	<250 mg/day	No	No	<250 mg/day	No	Yes	Yes	Yes	Yes
Visit 2	120	79	67		231	46	44	0.96	13_006	Baseline	32.2	120		79		67		231		32.2		44		46		0.96			13	Entered	40	Male	28OCT16	160	MF4637	<250 mg/day	No	No	<250 mg/day	No	Yes	Yes	Yes	Yes
Visit 3	120	80	60		239	47	45	0.96	13_006	Week 6	33.4	120	0	79	1	67	-7	231	8	32.2	1.2	44	1	46	1	0.96	0		13	Entered	40	Male	28OCT16	160	MF4637	<250 mg/day	No	No	<250 mg/day	No	Yes	Yes	Yes	Yes
Visit 4	121	82	65		244	48	47	0.98	13_006	Week 12	34.1	120	1	79	3	67	-2	231	13	32.2	1.9	44	3	46	2	0.96	0.02		13	Entered	40	Male	28OCT16	160	MF4637	<250 mg/day	No	No	<250 mg/day	No	Yes	Yes	Yes	Yes
Visit 5	120	79	68		251	49	48	0.98	13_006	Week 24	35	120	0	79	0	67	1	231	20	32.2	2.8	44	4	46	3	0.96	0.02	Gaining Weight	13	Entered	40	Male	28OCT16	160	MF4637	<250 mg/day	No	No	<250 mg/day	No	Yes	Yes	Yes	Yes
Visit 1	130	76	66	66	196				13_007	Screening	31.7	130		76		66		196		31.7									13	Screen Failure	57	Female								Yes	No	No	No	No
Visit 1	118	78	73	68	191				13_008	Screening	29.1	118		78		73		191		29.1									13	Screen Failure	67	Male								Yes	No	No	No	No
Visit 1	125	89	70	68	202.4				13_009	Screening	30.8	123		87		73		204		31		41		42		0.98			13	Entered	51	Male	05NOV16	267	Placebo	<250 mg/day	No	Yes	>=250 mg/day	No	Yes	Yes	Yes	Yes
Visit 2	123	87	73		204	42	41	0.98	13_009	Baseline	31	123		87		73		204		31		41		42		0.98			13	Entered	51	Male	05NOV16	267	Placebo	<250 mg/day	No	Yes	>=250 mg/day	No	Yes	Yes	Yes	Yes
Visit 3	120	81	65		204.5	42.5	41	0.96	13_009	Week 6	31.1	123	-3	87	-6	73	-8	204	0.5	31	0.1	41	0	42	0.5	0.98	-0.02		13	Entered	51	Male	05NOV16	267	Placebo	<250 mg/day	No	Yes	>=250 mg/day	No	Yes	Yes	Yes	Yes
Visit 4	123	82	68		203	42	41	0.98	13_009	Week 12	30.9	123	0	87	-5	73	-5	204	-1	31	-0.1	41	0	42	0	0.98	0		13	Entered	51	Male	05NOV16	267	Placebo	<250 mg/day	No	Yes	>=250 mg/day	No	Yes	Yes	Yes	Yes
Visit 5	120	83	70		205	43	42	0.98	13_009	Week 24	31.2	123	-3	87	-4	73	-3	204	1	31	0.2	41	1	42	1	0.98	0	Gaining Weight	13	Entered	51	Male	05NOV16	267	Placebo	<250 mg/day	No	Yes	>=250 mg/day	No	Yes	Yes	Yes	Yes
Visit 1	120	80	80	72	201				13_011	Screening	27.3	120		80		62		200		27.1		38		38.5		0.99			13	Entered	43	Male	28OCT16	207	Placebo	<250 mg/day	No	No	<250 mg/day	No	Yes	Yes	Yes	Yes
Visit 2	120	80	62		200	38.5	38	0.99	13_011	Baseline	27.1	120		80		62		200		27.1		38		38.5		0.99			13	Entered	43	Male	28OCT16	207	Placebo	<250 mg/day	No	No	<250 mg/day	No	Yes	Yes	Yes	Yes
Visit 3	120	80	65		198	38.5	38	0.99	13_011	Week 6	26.9	120	0	80	0	62	3	200	-2	27.1	-0.2	38	0	38.5	0	0.99	0		13	Entered	43	Male	28OCT16	207	Placebo	<250 mg/day	No	No	<250 mg/day	No	Yes	Yes	Yes	Yes
Visit 4	122	79	67		197	38	38	1	13_011	Week 12	26.7	120	2	80	-1	62	5	200	-3	27.1	-0.4	38	0	38.5	-0.5	0.99	0.01		13	Entered	43	Male	28OCT16	207	Placebo	<250 mg/day	No	No	<250 mg/day	No	Yes	Yes	Yes	Yes
Visit 5	121	79	68		204	40	39	0.98	13_011	Week 24	27.7	120	1	80	-1	62	6	200	4	27.1	0.6	38	1	38.5	1.5	0.99	-0.01	Gaining Weight	13	Entered	43	Male	28OCT16	207	Placebo	<250 mg/day	No	No	<250 mg/day	No	Yes	Yes	Yes	Yes
Visit 1	126	86	78	72	237				13_012	Screening	32.2	126		86		78		237		32.2									13	Screen Failure	43	Male							<250 mg/day	Yes	No	No	No	No
Visit 1	115	76	74	71	259				13_013	Screening	36.2	119		80		69		257		35.9		43		44.5		0.97			13	Entered	46	Male	28OCT16	161	MF4637	<250 mg/day	No	No	>=250 mg/day	No	Yes	Yes	Yes	Yes
Visit 2	119	80	69		257	44.5	43	0.97	13_013	Baseline	35.9	119		80		69		257		35.9		43		44.5		0.97			13	Entered	46	Male	28OCT16	161	MF4637	<250 mg/day	No	No	>=250 mg/day	No	Yes	Yes	Yes	Yes
Visit 3	121	78	62		260	44.5	43	0.97	13_013	Week 6	36.3	119	2	80	-2	69	-7	257	3	35.9	0.4	43	0	44.5	0	0.97	0		13	Entered	46	Male	28OCT16	161	MF4637	<250 mg/day	No	No	>=250 mg/day	No	Yes	Yes	Yes	Yes
Visit 4	120	82	65		258	44	42	0.95	13_013	Week 12	36	119	1	80	2	69	-4	257	1	35.9	0.1	43	-1	44.5	-0.5	0.97	-0.02		13	Entered	46	Male	28OCT16	161	MF4637	<250 mg/day	No	No	>=250 mg/day	No	Yes	Yes	Yes	Yes
Visit 5	118	79	68		261	45	43	0.96	13_013	Week 24	36.4	119	-1	80	-1	69	-1	257	4	35.9	0.5	43	0	44.5	0.5	0.97	-0.01	Gaining Weight	13	Entered	46	Male	28OCT16	161	MF4637	<250 mg/day	No	No	>=250 mg/day	No	Yes	Yes	Yes	Yes
Visit 1	119	73	61	62	136				13_014	Screening	24.9	121		78		65		137		25.1		34		40		0.85			13	Entered	71	Female	03NOV16	266	Placebo	<250 mg/day	No	Yes	<250 mg/day	No	Yes	Yes	Yes	Yes
Visit 2	121	78	65		137	40	34	0.85	13_014	Baseline	25.1	121		78		65		137		25.1		34		40		0.85			13	Entered	71	Female	03NOV16	266	Placebo	<250 mg/day	No	Yes	<250 mg/day	No	Yes	Yes	Yes	Yes
Visit 3	120	80	65		135	39	34	0.87	13_014	Week 6	24.7	121	-1	78	2	65	0	137	-2	25.1	-0.4	34	0	40	-1	0.85	0.02		13	Entered	71	Female	03NOV16	266	Placebo	<250 mg/day	No	Yes	<250 mg/day	No	Yes	Yes	Yes	Yes
Visit 4	121	80	68		137	39	34	0.87	13_014	Week 12	25.1	121	0	78	2	65	3	137	0	25.1	0	34	0	40	-1	0.85	0.02		13	Entered	71	Female	03NOV16	266	Placebo	<250 mg/day	No	Yes	<250 mg/day	No	Yes	Yes	Yes	Yes
Visit 5	118	80	68		136	39	34	0.87	13_014	Week 24	24.9	121	-3	78	2	65	3	137	-1	25.1	-0.2	34	0	40	-1	0.85	0.02	Losing Weight (0-5%)	13	Entered	71	Female	03NOV16	266	Placebo	<250 mg/day	No	Yes	<250 mg/day	No	Yes	Yes	Yes	Yes
Visit 1	140	88	69	67	207				13_015	Screening	32.4	135		79		69		206		32.3		44		43		1.02			13	Entered	75	Male	03NOV16	264	MF4637	<250 mg/day	No	Yes	<250 mg/day	No	Yes	Yes	Yes	Yes
Visit 2	135	79	69		206	43	44	1.02	13_015	Baseline	32.3	135		79		69		206		32.3		44		43		1.02			13	Entered	75	Male	03NOV16	264	MF4637	<250 mg/day	No	Yes	<250 mg/day	No	Yes	Yes	Yes	Yes
Visit 3	128	82	69		204	42.5	43	1.01	13_015	Week 6	32	135	-7	79	3	69	0	206	-2	32.3	-0.3	44	-1	43	-0.5	1.02	-0.01		13	Entered	75	Male	03NOV16	264	MF4637	<250 mg/day	No	Yes	<250 mg/day	No	Yes	Yes	Yes	Yes
Visit 4	130	85	70		208	43	44	1.02	13_015	Week 12	32.6	135	-5	79	6	69	1	206	2	32.3	0.3	44	0	43	0	1.02	0		13	Entered	75	Male	03NOV16	264	MF4637	<250 mg/day	No	Yes	<250 mg/day	No	Yes	Yes	Yes	Yes
Visit 5	125	82	72		209	43	44	1.02	13_015	Week 24	32.8	135	-10	79	3	69	3	206	3	32.3	0.5	44	0	43	0	1.02	0	Gaining Weight	13	Entered	75	Male	03NOV16	264	MF4637	<250 mg/day	No	Yes	<250 mg/day	No	Yes	Yes	Yes	Yes
Visit 1	118	64	68	61	138				13_016	Screening	26.1	120		83		72		136.8		25.9		35		38.5		0.91			13	Entered	70	Female	28OCT16	163	Placebo	<250 mg/day	No	Yes	>=250 mg/day	No	Yes	Yes	Yes	Yes
Visit 2	120	83	72		136.8	38.5	35	0.91	13_016	Baseline	25.9	120		83		72		136.8		25.9		35		38.5		0.91			13	Entered	70	Female	28OCT16	163	Placebo	<250 mg/day	No	Yes	>=250 mg/day	No	Yes	Yes	Yes	Yes
Visit 3	128	85	69		139	40	35	0.88	13_016	Week 6	26.3	120	8	83	2	72	-3	136.8	2.2	25.9	0.4	35	0	38.5	1.5	0.91	-0.03		13	Entered	70	Female	28OCT16	163	Placebo	<250 mg/day	No	Yes	>=250 mg/day	No	Yes	Yes	Yes	Yes
Visit 4	125	82	72		139	40	35	0.88	13_016	Week 12	26.3	120	5	83	-1	72	0	136.8	2.2	25.9	0.4	35	0	38.5	1.5	0.91	-0.03		13	Entered	70	Female	28OCT16	163	Placebo	<250 mg/day	No	Yes	>=250 mg/day	No	Yes	Yes	Yes	Yes
Visit 5	120	81	68		139	40	35	0.88	13_016	Week 24	26.3	120	0	83	-2	72	-4	136.8	2.2	25.9	0.4	35	0	38.5	1.5	0.91	-0.03	Gaining Weight	13	Entered	70	Female	28OCT16	163	Placebo	<250 mg/day	No	Yes	>=250 mg/day	No	Yes	Yes	Yes	Yes
Visit 1	145	89	72	62	211				13_017	Screening	38.6	130		87		68		212		38.8		49		47		1.04			13	Entered	52	Female	03NOV16	265	MF4637	<250 mg/day	Yes	Yes	>=250 mg/day	No	Yes	Yes	Yes	Yes
Visit 2	130	87	68		212	47	49	1.04	13_017	Baseline	38.8	130		87		68		212		38.8		49		47		1.04			13	Entered	52	Female	03NOV16	265	MF4637	<250 mg/day	Yes	Yes	>=250 mg/day	No	Yes	Yes	Yes	Yes
Visit 3	128	80	65		213	47	49	1.04	13_017	Week 6	39	130	-2	87	-7	68	-3	212	1	38.8	0.2	49	0	47	0	1.04	0		13	Entered	52	Female	03NOV16	265	MF4637	<250 mg/day	Yes	Yes	>=250 mg/day	No	Yes	Yes	Yes	Yes
Visit 4	125	79	68		215	48	50	1.04	13_017	Week 12	39.4	130	-5	87	-8	68	0	212	3	38.8	0.6	49	1	47	1	1.04	0		13	Entered	52	Female	03NOV16	265	MF4637	<250 mg/day	Yes	Yes	>=250 mg/day	No	Yes	Yes	Yes	Yes
Visit 5	125	83	70		220	50	52	1.04	13_017	Week 24	40.3	130	-5	87	-4	68	2	212	8	38.8	1.5	49	3	47	3	1.04	0	Gaining Weight	13	Entered	52	Female	03NOV16	265	MF4637	<250 mg/day	Yes	Yes	>=250 mg/day	No	Yes	Yes	Yes	Yes
Visit 1	117	75	85	64	199				13_019	Screening	34.2	120		78		73		198		34		44		47		0.94			13	Entered	47	Female	23NOV16	278	Placebo	<250 mg/day	No	No	<250 mg/day	No	Yes	Yes	Yes	Yes
Visit 2	120	78	73		198	47	44	0.94	13_019	Baseline	34	120		78		73		198		34		44		47		0.94			13	Entered	47	Female	23NOV16	278	Placebo	<250 mg/day	No	No	<250 mg/day	No	Yes	Yes	Yes	Yes
Visit 3	125	79	70		199	47	45	0.96	13_019	Week 6	34.2	120	5	78	1	73	-3	198	1	34	0.2	44	1	47	0	0.94	0.02		13	Entered	47	Female	23NOV16	278	Placebo	<250 mg/day	No	No	<250 mg/day	No	Yes	Yes	Yes	Yes
Visit 4	118	75	70		200	47	45	0.96	13_019	Week 12	34.4	120	-2	78	-3	73	-3	198	2	34	0.4	44	1	47	0	0.94	0.02		13	Entered	47	Female	23NOV16	278	Placebo	<250 mg/day	No	No	<250 mg/day	No	Yes	Yes	Yes	Yes
Visit 5	120	78	72		198	47	44.5	0.95	13_019	Week 24	34	120	0	78	0	73	-1	198	0	34	0	44	0.5	47	0	0.94	0.01	Losing Weight (0-5%)	13	Entered	47	Female	23NOV16	278	Placebo	<250 mg/day	No	No	<250 mg/day	No	Yes	Yes	Yes	Yes
Visit 1	148	90	78	69	242				13_020	Screening	35.8	138		85		69		245		36.2		50		43		1.16			13	Entered	55	Male	17NOV16	277	Placebo	<250 mg/day	No	No	<250 mg/day	No	Yes	Yes	Yes	Yes
Visit 2	138	85	69		245	43	50	1.16	13_020	Baseline	36.2	138		85		69		245		36.2		50		43		1.16			13	Entered	55	Male	17NOV16	277	Placebo	<250 mg/day	No	No	<250 mg/day	No	Yes	Yes	Yes	Yes
Visit 3	134	87	65		247	44	49	1.11	13_020	Week 6	36.5	138	-4	85	2	69	-4	245	2	36.2	0.3	50	-1	43	1	1.16	-0.05		13	Entered	55	Male	17NOV16	277	Placebo	<250 mg/day	No	No	<250 mg/day	No	Yes	Yes	Yes	Yes
Visit 4	136	85	68		249	45	50	1.11	13_020	Week 12	36.8	138	-2	85	0	69	-1	245	4	36.2	0.6	50	0	43	2	1.16	-0.05		13	Entered	55	Male	17NOV16	277	Placebo	<250 mg/day	No	No	<250 mg/day	No	Yes	Yes	Yes	Yes
Visit 5	140	85	78		250	45	50	1.11	13_020	Week 24	37	138	2	85	0	69	9	245	5	36.2	0.8	50	0	43	2	1.16	-0.05	Gaining Weight	13	Entered	55	Male	17NOV16	277	Placebo	<250 mg/day	No	No	<250 mg/day	No	Yes	Yes	Yes	Yes
Visit 1	125	83	61	65	237.6				14_001	Screening	39.6	119		75		65		238.6		39.7		46.5		45		1.03			14	Entered	61	Male	25OCT16	185	Placebo	>=250 mg/day	No	Yes	>=250 mg/day	No	Yes	Yes	Yes	Yes
Visit 2	119	75	65		238.6	45	46.5	1.03	14_001	Baseline	39.7	119		75		65		238.6		39.7		46.5		45		1.03			14	Entered	61	Male	25OCT16	185	Placebo	>=250 mg/day	No	Yes	>=250 mg/day	No	Yes	Yes	Yes	Yes
Visit 3	114	71	63		240	45	46.75	1.04	14_001	Week 6	40	119	-5	75	-4	65	-2	238.6	1.4	39.7	0.3	46.5	0.25	45	0	1.03	0.01		14	Entered	61	Male	25OCT16	185	Placebo	>=250 mg/day	No	Yes	>=250 mg/day	No	Yes	Yes	Yes	Yes
Visit 4	105	76	64		238.4	46	48.6	1.06	14_001	Week 12	39.7	119	-14	75	1	65	-1	238.6	-0.2	39.7	0	46.5	2.1	45	1	1.03	0.03		14	Entered	61	Male	25OCT16	185	Placebo	>=250 mg/day	No	Yes	>=250 mg/day	No	Yes	Yes	Yes	Yes
Visit 5	121	72	70		236.4	46	47	1.02	14_001	Week 24	39.4	119	2	75	-3	65	5	238.6	-2.2	39.7	-0.3	46.5	0.5	45	1	1.03	-0.01	Losing Weight (0-5%)	14	Entered	61	Male	25OCT16	185	Placebo	>=250 mg/day	No	Yes	>=250 mg/day	No	Yes	Yes	Yes	Yes
Visit 1	146	84	64	63	194.5				14_002	Screening	34.5	143		89		61		190.6		33.8		38		46		0.83			14	Entered	44	Female	12OCT16	208	MF4637	<250 mg/day	No	Yes	>=250 mg/day	No	Yes	Yes	Yes	Yes
Visit 2	143	89	61		190.6	46	38	0.83	14_002	Baseline	33.8	143		89		61		190.6		33.8		38		46		0.83			14	Entered	44	Female	12OCT16	208	MF4637	<250 mg/day	No	Yes	>=250 mg/day	No	Yes	Yes	Yes	Yes
Visit 3	143	95	70		190	46.5	37.25	0.8	14_002	Week 6	33.7	143	0	89	6	61	9	190.6	-0.6	33.8	-0.1	38	-0.75	46	0.5	0.83	-0.03		14	Entered	44	Female	12OCT16	208	MF4637	<250 mg/day	No	Yes	>=250 mg/day	No	Yes	Yes	Yes	Yes
Visit 4	123	85	71		187.2	45.5	35	0.77	14_002	Week 12	33.2	143	-20	89	-4	61	10	190.6	-3.4	33.8	-0.6	38	-3	46	-0.5	0.83	-0.06		14	Entered	44	Female	12OCT16	208	MF4637	<250 mg/day	No	Yes	>=250 mg/day	No	Yes	Yes	Yes	Yes
Visit 5	159	89	93		192	47.5	37.75	0.79	14_002	Week 24	34	143	16	89	0	61	32	190.6	1.4	33.8	0.2	38	-0.25	46	1.5	0.83	-0.04	Gaining Weight	14	Entered	44	Female	12OCT16	208	MF4637	<250 mg/day	No	Yes	>=250 mg/day	No	Yes	Yes	Yes	Yes
Visit 1	101	73	84	63	171.6				14_006	Screening	30.4	101		73		84		171.6		30.4									14	Screen Failure	33	Female							>=250 mg/day	Yes	No	No	No	No
Visit 1	112	68	56	63	155				14_010	Screening	27.5	104		60		60		156.2		27.7		34.5		40		0.86			14	Early Termination	61	Female		184	MF4637	<250 mg/day	No	No	>=250 mg/day	No	No	Yes	No	No
Visit 2	104	60	60		156.2	40	34.5	0.86	14_010	Baseline	27.7	104		60		60		156.2		27.7		34.5		40		0.86			14	Early Termination	61	Female		184	MF4637	<250 mg/day	No	No	>=250 mg/day	No	No	Yes	No	No
Visit 1	132	79	57	66	208				14_012	Screening	33.6	131		71		61		206.6		33.4		39		43.25		0.9			14	Early Termination	34	Male	15NOV16	186	Placebo	<250 mg/day	No	No	>=250 mg/day	No	Yes	Yes	Yes	Yes
Visit 2	131	71	61		206.6	43.25	39	0.9	14_012	Baseline	33.4	131		71		61		206.6		33.4		39		43.25		0.9			14	Early Termination	34	Male	15NOV16	186	Placebo	<250 mg/day	No	No	>=250 mg/day	No	Yes	Yes	Yes	Yes
Visit 3	134	76	62		197.8	40	37.5	0.94	14_012	Week 6	32	131	3	71	5	61	1	206.6	-8.8	33.4	-1.4	39	-1.5	43.25	-3.25	0.9	0.04		14	Early Termination	34	Male	15NOV16	186	Placebo	<250 mg/day	No	No	>=250 mg/day	No	Yes	Yes	Yes	Yes
Visit 4	126	66	66		201.4	40	38	0.95	14_012	Week 12	32.5	131	-5	71	-5	61	5	206.6	-5.2	33.4	-0.9	39	-1	43.25	-3.25	0.9	0.05		14	Early Termination	34	Male	15NOV16	186	Placebo	<250 mg/day	No	No	>=250 mg/day	No	Yes	Yes	Yes	Yes
Visit 1	117	79	68	63	210.2				14_014	Screening	37.3	102		73		74		210.4		37.3		49		46.5		1.05			14	Entered	33	Female	16NOV16	187	MF4637	<250 mg/day	No	No	>=250 mg/day	No	Yes	Yes	Yes	Yes
Visit 2	102	73	74		210.4	46.5	49	1.05	14_014	Baseline	37.3	102		73		74		210.4		37.3		49		46.5		1.05			14	Entered	33	Female	16NOV16	187	MF4637	<250 mg/day	No	No	>=250 mg/day	No	Yes	Yes	Yes	Yes
Visit 3	123	75	85		206.4	47	48	1.02	14_014	Week 6	36.6	102	21	73	2	74	11	210.4	-4	37.3	-0.7	49	-1	46.5	0.5	1.05	-0.03		14	Entered	33	Female	16NOV16	187	MF4637	<250 mg/day	No	No	>=250 mg/day	No	Yes	Yes	Yes	Yes
Visit 4	127	77	70		206.4	46.75	47.5	1.02	14_014	Week 12	36.6	102	25	73	4	74	-4	210.4	-4	37.3	-0.7	49	-1.5	46.5	0.25	1.05	-0.03		14	Entered	33	Female	16NOV16	187	MF4637	<250 mg/day	No	No	>=250 mg/day	No	Yes	Yes	Yes	Yes
Visit 5	122	72	69		209.8	46.5	43.75	0.94	14_014	Week 24	37.2	102	20	73	-1	74	-5	210.4	-0.6	37.3	-0.1	49	-5.25	46.5	0	1.05	-0.11	Losing Weight (0-5%)	14	Entered	33	Female	16NOV16	187	MF4637	<250 mg/day	No	No	>=250 mg/day	No	Yes	Yes	Yes	Yes
Visit 1	110	81	65	67	149				14_016	Screening	23.4	125		73		66		149.2		23.4		28.5		37.25		0.77			14	Entered	51	Female	01DEC16	209	Placebo	<250 mg/day	No	No	<250 mg/day	No	Yes	Yes	Yes	Yes
Visit 2	125	73	66		149.2	37.25	28.5	0.77	14_016	Baseline	23.4	125		73		66		149.2		23.4		28.5		37.25		0.77			14	Entered	51	Female	01DEC16	209	Placebo	<250 mg/day	No	No	<250 mg/day	No	Yes	Yes	Yes	Yes
Visit 3	130	82	69		148	41.5	29.5	0.71	14_016	Week 6	23.2	125	5	73	9	66	3	149.2	-1.2	23.4	-0.2	28.5	1	37.25	4.25	0.77	-0.06		14	Entered	51	Female	01DEC16	209	Placebo	<250 mg/day	No	No	<250 mg/day	No	Yes	Yes	Yes	Yes
Visit 4	117	78	79		141.8	37	28	0.76	14_016	Week 12	22.2	125	-8	73	5	66	13	149.2	-7.4	23.4	-1.2	28.5	-0.5	37.25	-0.25	0.77	-0.01		14	Entered	51	Female	01DEC16	209	Placebo	<250 mg/day	No	No	<250 mg/day	No	Yes	Yes	Yes	Yes
Visit 5	123	77	69		143.8	40	28.25	0.71	14_016	Week 24	22.5	125	-2	73	4	66	3	149.2	-5.4	23.4	-0.9	28.5	-0.25	37.25	2.75	0.77	-0.06	Losing Weight (0-5%)	14	Entered	51	Female	01DEC16	209	Placebo	<250 mg/day	No	No	<250 mg/day	No	Yes	Yes	Yes	Yes
Visit 1	97	64	60	59	186				14_018	Screening	37.6	116		68		60		187.8		38		43		47		0.91			14	Entered	25	Female	05DEC16	210	MF4637	>=250 mg/day	No	No	>=250 mg/day	No	Yes	Yes	Yes	Yes
Visit 2	116	68	60		187.8	47	43	0.91	14_018	Baseline	38	116		68		60		187.8		38		43		47		0.91			14	Entered	25	Female	05DEC16	210	MF4637	>=250 mg/day	No	No	>=250 mg/day	No	Yes	Yes	Yes	Yes
Visit 3	112	73	64		184.4	44.5	43	0.97	14_018	Week 6	37.3	116	-4	68	5	60	4	187.8	-3.4	38	-0.7	43	0	47	-2.5	0.91	0.06		14	Entered	25	Female	05DEC16	210	MF4637	>=250 mg/day	No	No	>=250 mg/day	No	Yes	Yes	Yes	Yes
Visit 4	111	70	64		186.2	42.5	43	1.01	14_018	Week 12	37.6	116	-5	68	2	60	4	187.8	-1.6	38	-0.4	43	0	47	-4.5	0.91	0.1		14	Entered	25	Female	05DEC16	210	MF4637	>=250 mg/day	No	No	>=250 mg/day	No	Yes	Yes	Yes	Yes
Visit 5	100	71	69		192.6	46	43	0.93	14_018	Week 24	38.9	116	-16	68	3	60	9	187.8	4.8	38	0.9	43	0	47	-1	0.91	0.02	Gaining Weight	14	Entered	25	Female	05DEC16	210	MF4637	>=250 mg/day	No	No	>=250 mg/day	No	Yes	Yes	Yes	Yes
Visit 1	118	93	88	71	286				14_019	Screening	39.9	120		91		99		283.6		39.6		47.75		48		0.99			14	Entered	32	Male	03DEC16	211	Placebo	<250 mg/day	No	Yes	<250 mg/day	No	Yes	Yes	Yes	Yes
Visit 2	120	91	99		283.6	48	47.75	0.99	14_019	Baseline	39.6	120		91		99		283.6		39.6		47.75		48		0.99			14	Entered	32	Male	03DEC16	211	Placebo	<250 mg/day	No	Yes	<250 mg/day	No	Yes	Yes	Yes	Yes
Visit 3	125	87	98		280.2	47.5	46.5	0.98	14_019	Week 6	39.1	120	5	91	-4	99	-1	283.6	-3.4	39.6	-0.5	47.75	-1.25	48	-0.5	0.99	-0.01		14	Entered	32	Male	03DEC16	211	Placebo	<250 mg/day	No	Yes	<250 mg/day	No	Yes	Yes	Yes	Yes
Visit 4	121	81	87		279	47	46.5	0.99	14_019	Week 12	38.9	120	1	91	-10	99	-12	283.6	-4.6	39.6	-0.7	47.75	-1.25	48	-1	0.99	0		14	Entered	32	Male	03DEC16	211	Placebo	<250 mg/day	No	Yes	<250 mg/day	No	Yes	Yes	Yes	Yes
Visit 5	126	83	84		300.6	50	48	0.96	14_019	Week 24	42	120	6	91	-8	99	-15	283.6	17	39.6	2.4	47.75	0.25	48	2	0.99	-0.03	Gaining Weight	14	Entered	32	Male	03DEC16	211	Placebo	<250 mg/day	No	Yes	<250 mg/day	No	Yes	Yes	Yes	Yes
Visit 1	117	76	72	70	222				15_001	Screening	31.9	117		76		72		222		31.9									15	Screen Failure	45	Male							>=250 mg/day	Yes	No	No	No	No
Visit 1	120	80	82	68	204				15_002	Screening	31	108		68		76		204		31		43		43		1			15	Entered	67	Male	27SEP16	149	Placebo	<250 mg/day	No	No	<250 mg/day	No	Yes	Yes	Yes	Yes
Visit 2	108	68	76		204	43	43	1	15_002	Baseline	31	108		68		76		204		31		43		43		1			15	Entered	67	Male	27SEP16	149	Placebo	<250 mg/day	No	No	<250 mg/day	No	Yes	Yes	Yes	Yes
Visit 3	130	79	77		197	44	44	1	15_002	Week 6	30	108	22	68	11	76	1	204	-7	31	-1	43	1	43	1	1	0		15	Entered	67	Male	27SEP16	149	Placebo	<250 mg/day	No	No	<250 mg/day	No	Yes	Yes	Yes	Yes
Visit 4	113	81	74		195	45	45	1	15_002	Week 12	29.7	108	5	68	13	76	-2	204	-9	31	-1.3	43	2	43	2	1	0		15	Entered	67	Male	27SEP16	149	Placebo	<250 mg/day	No	No	<250 mg/day	No	Yes	Yes	Yes	Yes
Visit 5	136	82	70		197	45	47	1.04	15_002	Week 24	30	108	28	68	14	76	-6	204	-7	31	-1	43	4	43	2	1	0.04	Losing Weight (0-5%)	15	Entered	67	Male	27SEP16	149	Placebo	<250 mg/day	No	No	<250 mg/day	No	Yes	Yes	Yes	Yes
Visit 1	115	76	78	68	240				15_003	Screening	36.5	115		76		78		240		36.5									15	Screen Failure	20	Male							>=250 mg/day	Yes	No	No	No	No
Visit 1	140	90	75	70	225				15_004	Screening	32.3	140		90		75		225		32.3									15	Screen Failure	72	Male							<250 mg/day	Yes	No	No	No	No
Visit 1	124	78	76	71	205				15_005	Screening	28.6	122		76		68		205		28.6		44		45		0.98			15	Entered	58	Male	28SEP16	150	Placebo	<250 mg/day	No	No	>=250 mg/day	No	Yes	Yes	Yes	Yes
Visit 2	122	76	68		205	45	44	0.98	15_005	Baseline	28.6	122		76		68		205		28.6		44		45		0.98			15	Entered	58	Male	28SEP16	150	Placebo	<250 mg/day	No	No	>=250 mg/day	No	Yes	Yes	Yes	Yes
Visit 3	132	85	81		204	43	40	0.93	15_005	Week 6	28.5	122	10	76	9	68	13	205	-1	28.6	-0.1	44	-4	45	-2	0.98	-0.05		15	Entered	58	Male	28SEP16	150	Placebo	<250 mg/day	No	No	>=250 mg/day	No	Yes	Yes	Yes	Yes
Visit 4	130	82	84		200	41.5	41	0.99	15_005	Week 12	27.9	122	8	76	6	68	16	205	-5	28.6	-0.7	44	-3	45	-3.5	0.98	0.01		15	Entered	58	Male	28SEP16	150	Placebo	<250 mg/day	No	No	>=250 mg/day	No	Yes	Yes	Yes	Yes
Visit 5	128	80	80		204	44.5	42.5	0.96	15_005	Week 24	28.5	122	6	76	4	68	12	205	-1	28.6	-0.1	44	-1.5	45	-0.5	0.98	-0.02	Losing Weight (0-5%)	15	Entered	58	Male	28SEP16	150	Placebo	<250 mg/day	No	No	>=250 mg/day	No	Yes	Yes	Yes	Yes
Visit 1	147	81	63	74	272				15_006	Screening	35	123		81		60		270		34.7		48		50		0.96			15	Entered	69	Male	27SEP16	148	MF4637	<250 mg/day	No	No	>=250 mg/day	No	Yes	Yes	Yes	Yes
Visit 2	123	81	60		270	50	48	0.96	15_006	Baseline	34.7	123		81		60		270		34.7		48		50		0.96			15	Entered	69	Male	27SEP16	148	MF4637	<250 mg/day	No	No	>=250 mg/day	No	Yes	Yes	Yes	Yes
Visit 3	140	81	73		272	47	48	1.02	15_006	Week 6	35	123	17	81	0	60	13	270	2	34.7	0.3	48	0	50	-3	0.96	0.06		15	Entered	69	Male	27SEP16	148	MF4637	<250 mg/day	No	No	>=250 mg/day	No	Yes	Yes	Yes	Yes
Visit 4	125	78	59		280	47.5	47	0.99	15_006	Week 12	36	123	2	81	-3	60	-1	270	10	34.7	1.3	48	-1	50	-2.5	0.96	0.03		15	Entered	69	Male	27SEP16	148	MF4637	<250 mg/day	No	No	>=250 mg/day	No	Yes	Yes	Yes	Yes
Visit 5	124	77	55		272	49.5	49.5	1	15_006	Week 24	35	123	1	81	-4	60	-5	270	2	34.7	0.3	48	1.5	50	-0.5	0.96	0.04	Gaining Weight	15	Entered	69	Male	27SEP16	148	MF4637	<250 mg/day	No	No	>=250 mg/day	No	Yes	Yes	Yes	Yes
Visit 1	149	83	60	66	161				15_007	Screening	26	135		78		76		163		26.3		41		39		1.05			15	Entered	74	Male	29SEP16	236	Placebo	<250 mg/day	No	No	>=250 mg/day	No	Yes	Yes	Yes	Yes
Visit 2	135	78	76		163	39	41	1.05	15_007	Baseline	26.3	135		78		76		163		26.3		41		39		1.05			15	Entered	74	Male	29SEP16	236	Placebo	<250 mg/day	No	No	>=250 mg/day	No	Yes	Yes	Yes	Yes
Visit 3	154	84	82		164	35	39	1.11	15_007	Week 6	26.5	135	19	78	6	76	6	163	1	26.3	0.2	41	-2	39	-4	1.05	0.06		15	Entered	74	Male	29SEP16	236	Placebo	<250 mg/day	No	No	>=250 mg/day	No	Yes	Yes	Yes	Yes
Visit 4	147	79	54		160	40	39.7	0.99	15_007	Week 12	25.8	135	12	78	1	76	-22	163	-3	26.3	-0.5	41	-1.3	39	1	1.05	-0.06		15	Entered	74	Male	29SEP16	236	Placebo	<250 mg/day	No	No	>=250 mg/day	No	Yes	Yes	Yes	Yes
Visit 5	160	70	78		165	39	40	1.03	15_007	Week 24	26.7	135	25	78	-8	76	2	163	2	26.3	0.4	41	-1	39	0	1.05	-0.02	Gaining Weight	15	Entered	74	Male	29SEP16	236	Placebo	<250 mg/day	No	No	>=250 mg/day	No	Yes	Yes	Yes	Yes
Visit 1	124	76	89	77	251				15_008	Screening	29.8	125		77		71		248		29.4		45		43		1.05			15	Entered	55	Male	28SEP16	151	MF4637	<250 mg/day	No	No	<250 mg/day	No	Yes	Yes	Yes	Yes
Visit 2	125	77	71		248	43	45	1.05	15_008	Baseline	29.4	125		77		71		248		29.4		45		43		1.05			15	Entered	55	Male	28SEP16	151	MF4637	<250 mg/day	No	No	<250 mg/day	No	Yes	Yes	Yes	Yes
Visit 3	132	81	94		259	42.5	46	1.08	15_008	Week 6	30.7	125	7	77	4	71	23	248	11	29.4	1.3	45	1	43	-0.5	1.05	0.03		15	Entered	55	Male	28SEP16	151	MF4637	<250 mg/day	No	No	<250 mg/day	No	Yes	Yes	Yes	Yes
Visit 4	111	69	72		235	46	48	1.04	15_008	Week 12	27.9	125	-14	77	-8	71	1	248	-13	29.4	-1.5	45	3	43	3	1.05	-0.01		15	Entered	55	Male	28SEP16	151	MF4637	<250 mg/day	No	No	<250 mg/day	No	Yes	Yes	Yes	Yes
Visit 5	133	91	84		260	46	48	1.04	15_008	Week 24	30.9	125	8	77	14	71	13	248	12	29.4	1.5	45	3	43	3	1.05	-0.01	Gaining Weight	15	Entered	55	Male	28SEP16	151	MF4637	<250 mg/day	No	No	<250 mg/day	No	Yes	Yes	Yes	Yes
Visit 1	129	72	67	63	180				15_009	Screening	31.9	137		82		82		178		31.6		38		45		0.84			15	Entered	70	Female	10OCT16	237	MF4637	<250 mg/day	No	No	<250 mg/day	No	Yes	Yes	Yes	Yes
Visit 2	137	82	82		178	45	38	0.84	15_009	Baseline	31.6	137		82		82		178		31.6		38		45		0.84			15	Entered	70	Female	10OCT16	237	MF4637	<250 mg/day	No	No	<250 mg/day	No	Yes	Yes	Yes	Yes
Visit 3	129	78	74		174	49	42	0.86	15_009	Week 6	30.9	137	-8	82	-4	82	-8	178	-4	31.6	-0.7	38	4	45	4	0.84	0.02		15	Entered	70	Female	10OCT16	237	MF4637	<250 mg/day	No	No	<250 mg/day	No	Yes	Yes	Yes	Yes
Visit 4	115	80	77		179	41	45	1.1	15_009	Week 12	31.7	137	-22	82	-2	82	-5	178	1	31.6	0.1	38	7	45	-4	0.84	0.26		15	Entered	70	Female	10OCT16	237	MF4637	<250 mg/day	No	No	<250 mg/day	No	Yes	Yes	Yes	Yes
Visit 5	141	80	57		177	50	43	0.86	15_009	Week 24	31.4	137	4	82	-2	82	-25	178	-1	31.6	-0.2	38	5	45	5	0.84	0.02	Losing Weight (0-5%)	15	Entered	70	Female	10OCT16	237	MF4637	<250 mg/day	No	No	<250 mg/day	No	Yes	Yes	Yes	Yes
Visit 1	130	92	73	63	177				15_010	Screening	31.4	120		75		64		180		31.9		43		44		0.98			15	Entered	64	Female	11OCT16	238	Placebo	<250 mg/day	No	No	<250 mg/day	No	Yes	Yes	Yes	Yes
Visit 2	120	75	64		180	44	43	0.98	15_010	Baseline	31.9	120		75		64		180		31.9		43		44		0.98			15	Entered	64	Female	11OCT16	238	Placebo	<250 mg/day	No	No	<250 mg/day	No	Yes	Yes	Yes	Yes
Visit 3	125	76	68		177	44	42	0.95	15_010	Week 6	31.4	120	5	75	1	64	4	180	-3	31.9	-0.5	43	-1	44	0	0.98	-0.03		15	Entered	64	Female	11OCT16	238	Placebo	<250 mg/day	No	No	<250 mg/day	No	Yes	Yes	Yes	Yes
Visit 4	132	89	83		178	44	41	0.93	15_010	Week 12	31.6	120	12	75	14	64	19	180	-2	31.9	-0.3	43	-2	44	0	0.98	-0.05		15	Entered	64	Female	11OCT16	238	Placebo	<250 mg/day	No	No	<250 mg/day	No	Yes	Yes	Yes	Yes
Visit 5	132	89	83		178	44	41	0.93	15_010	Week 24	31.6	120	12	75	14	64	19	180	-2	31.9	-0.3	43	-2	44	0	0.98	-0.05	Losing Weight (0-5%)	15	Entered	64	Female	11OCT16	238	Placebo	<250 mg/day	No	No	<250 mg/day	No	Yes	Yes	Yes	Yes
Visit 1	132	84	65	63	220				15_011	Screening	39	130		85		78		222		39.4		53		57		0.93			15	Entered	66	Male	13OCT16	240	Placebo	<250 mg/day	No	No	<250 mg/day	No	Yes	Yes	Yes	Yes
Visit 2	130	85	78		222	57	53	0.93	15_011	Baseline	39.4	130		85		78		222		39.4		53		57		0.93			15	Entered	66	Male	13OCT16	240	Placebo	<250 mg/day	No	No	<250 mg/day	No	Yes	Yes	Yes	Yes
Visit 3	130	93	80		223	56	56	1	15_011	Week 6	39.5	130	0	85	8	78	2	222	1	39.4	0.1	53	3	57	-1	0.93	0.07		15	Entered	66	Male	13OCT16	240	Placebo	<250 mg/day	No	No	<250 mg/day	No	Yes	Yes	Yes	Yes
Visit 4	152	94	92		273	58.5	54	0.92	15_011	Week 12	48.4	130	22	85	9	78	14	222	51	39.4	9	53	1	57	1.5	0.93	-0.01		15	Entered	66	Male	13OCT16	240	Placebo	<250 mg/day	No	No	<250 mg/day	No	Yes	Yes	Yes	Yes
Visit 5	138	91	67		220	56	52	0.93	15_011	Week 24	39	130	8	85	6	78	-11	222	-2	39.4	-0.4	53	-1	57	-1	0.93	0	Losing Weight (0-5%)	15	Entered	66	Male	13OCT16	240	Placebo	<250 mg/day	No	No	<250 mg/day	No	Yes	Yes	Yes	Yes
Visit 1	129	80	75	60	143				15_012	Screening	28	127		85		76		144		28.1		36.5		40		0.91			15	Entered	54	Female	19OCT16	241	Placebo	<250 mg/day	No	No	<250 mg/day	No	Yes	Yes	Yes	Yes
Visit 2	127	85	76		144	40	36.5	0.91	15_012	Baseline	28.1	127		85		76		144		28.1		36.5		40		0.91			15	Entered	54	Female	19OCT16	241	Placebo	<250 mg/day	No	No	<250 mg/day	No	Yes	Yes	Yes	Yes
Visit 3	124	72	74		144	40	36	0.9	15_012	Week 6	28.1	127	-3	85	-13	76	-2	144	0	28.1	0	36.5	-0.5	40	0	0.91	-0.01		15	Entered	54	Female	19OCT16	241	Placebo	<250 mg/day	No	No	<250 mg/day	No	Yes	Yes	Yes	Yes
Visit 4	120	79	74		148	40	30	0.75	15_012	Week 12	28.9	127	-7	85	-6	76	-2	144	4	28.1	0.8	36.5	-6.5	40	0	0.91	-0.16		15	Entered	54	Female	19OCT16	241	Placebo	<250 mg/day	No	No	<250 mg/day	No	Yes	Yes	Yes	Yes
Visit 5	128	82	78		145	39.5	30	0.76	15_012	Week 24	28.3	127	1	85	-3	76	2	144	1	28.1	0.2	36.5	-6.5	40	-0.5	0.91	-0.15	Gaining Weight	15	Entered	54	Female	19OCT16	241	Placebo	<250 mg/day	No	No	<250 mg/day	No	Yes	Yes	Yes	Yes
Visit 1	138	86	72	62	173				15_013	Screening	31.7	137		82		81		174		31.9		39		46		0.85			15	Entered	58	Female	13OCT16	242	MF4637	<250 mg/day	No	No	>=250 mg/day	No	Yes	Yes	Yes	Yes
Visit 2	137	82	81		174	46	39	0.85	15_013	Baseline	31.9	137		82		81		174		31.9		39		46		0.85			15	Entered	58	Female	13OCT16	242	MF4637	<250 mg/day	No	No	>=250 mg/day	No	Yes	Yes	Yes	Yes
Visit 3	144	85	79		177	47	41	0.87	15_013	Week 6	32.4	137	7	82	3	81	-2	174	3	31.9	0.5	39	2	46	1	0.85	0.02		15	Entered	58	Female	13OCT16	242	MF4637	<250 mg/day	No	No	>=250 mg/day	No	Yes	Yes	Yes	Yes
Visit 4	141	91	81		172	46	40	0.87	15_013	Week 12	31.5	137	4	82	9	81	0	174	-2	31.9	-0.4	39	1	46	0	0.85	0.02		15	Entered	58	Female	13OCT16	242	MF4637	<250 mg/day	No	No	>=250 mg/day	No	Yes	Yes	Yes	Yes
Visit 5	138	83	78		167	46.5	40	0.86	15_013	Week 24	30.6	137	1	82	1	81	-3	174	-7	31.9	-1.3	39	1	46	0.5	0.85	0.01	Losing Weight (0-5%)	15	Entered	58	Female	13OCT16	242	MF4637	<250 mg/day	No	No	>=250 mg/day	No	Yes	Yes	Yes	Yes
Visit 1	125	82	87	72	290				15_014	Screening	39.4	98		65		71		290		39.4		53		59		0.9			15	Entered	55	Female	13OCT16	239	MF4637	<250 mg/day	No	No	>=250 mg/day	No	Yes	Yes	Yes	Yes
Visit 2	98	65	71		290	59	53	0.9	15_014	Baseline	39.4	98		65		71		290		39.4		53		59		0.9			15	Entered	55	Female	13OCT16	239	MF4637	<250 mg/day	No	No	>=250 mg/day	No	Yes	Yes	Yes	Yes
Visit 3	124	72	70		287	59	52	0.88	15_014	Week 6	39	98	26	65	7	71	-1	290	-3	39.4	-0.4	53	-1	59	0	0.9	-0.02		15	Entered	55	Female	13OCT16	239	MF4637	<250 mg/day	No	No	>=250 mg/day	No	Yes	Yes	Yes	Yes
Visit 4	124	72	70		287	59	52	0.88	15_014	Week 12	39	98	26	65	7	71	-1	290	-3	39.4	-0.4	53	-1	59	0	0.9	-0.02		15	Entered	55	Female	13OCT16	239	MF4637	<250 mg/day	No	No	>=250 mg/day	No	Yes	Yes	Yes	Yes
Visit 5	130	90	84		305	56	52	0.93	15_014	Week 24	41.4	98	32	65	25	71	13	290	15	39.4	2	53	-1	59	-3	0.9	0.03	Gaining Weight	15	Entered	55	Female	13OCT16	239	MF4637	<250 mg/day	No	No	>=250 mg/day	No	Yes	Yes	Yes	Yes
Visit 1	155	85	62	61	167				15_015	Screening	31.6	142		79		71		166		31.4		45		45		1			15	Entered	81	Female	09NOV16	268	MF4637	<250 mg/day	No	No	<250 mg/day	No	Yes	Yes	Yes	Yes
Visit 2	142	79	71		166	45	45	1	15_015	Baseline	31.4	142		79		71		166		31.4		45		45		1			15	Entered	81	Female	09NOV16	268	MF4637	<250 mg/day	No	No	<250 mg/day	No	Yes	Yes	Yes	Yes
Visit 3	117	69	56		170	46	44.5	0.97	15_015	Week 6	32.1	142	-25	79	-10	71	-15	166	4	31.4	0.7	45	-0.5	45	1	1	-0.03		15	Entered	81	Female	09NOV16	268	MF4637	<250 mg/day	No	No	<250 mg/day	No	Yes	Yes	Yes	Yes
Visit 4	150	73	57		168	46	45	0.98	15_015	Week 12	31.8	142	8	79	-6	71	-14	166	2	31.4	0.4	45	0	45	1	1	-0.02		15	Entered	81	Female	09NOV16	268	MF4637	<250 mg/day	No	No	<250 mg/day	No	Yes	Yes	Yes	Yes
Visit 5	132	76	78		168	45	44	0.98	15_015	Week 24	31.8	142	-10	79	-3	71	7	166	2	31.4	0.4	45	-1	45	0	1	-0.02	Gaining Weight	15	Entered	81	Female	09NOV16	268	MF4637	<250 mg/day	No	No	<250 mg/day	No	Yes	Yes	Yes	Yes
Visit 1	134	82	85	62	136				15_016	Screening	24.9	148		93		98		137		25.1		38		44		0.86			15	Entered	77	Female	09NOV16	243	MF4637	<250 mg/day	Yes	No	>=250 mg/day	No	Yes	Yes	Yes	Yes
Visit 2	148	93	98		137	44	38	0.86	15_016	Baseline	25.1	148		93		98		137		25.1		38		44		0.86			15	Entered	77	Female	09NOV16	243	MF4637	<250 mg/day	Yes	No	>=250 mg/day	No	Yes	Yes	Yes	Yes
Visit 3	146	92	96		136	43	37	0.86	15_016	Week 6	24.9	148	-2	93	-1	98	-2	137	-1	25.1	-0.2	38	-1	44	-1	0.86	0		15	Entered	77	Female	09NOV16	243	MF4637	<250 mg/day	Yes	No	>=250 mg/day	No	Yes	Yes	Yes	Yes
Visit 4	150	87	90		137	44	38	0.86	15_016	Week 12	25.1	148	2	93	-6	98	-8	137	0	25.1	0	38	0	44	0	0.86	0		15	Entered	77	Female	09NOV16	243	MF4637	<250 mg/day	Yes	No	>=250 mg/day	No	Yes	Yes	Yes	Yes
Visit 5	130	80	82		139	44.5	38	0.85	15_016	Week 24	25.4	148	-18	93	-13	98	-16	137	2	25.1	0.3	38	0	44	0.5	0.86	-0.01	Gaining Weight	15	Entered	77	Female	09NOV16	243	MF4637	<250 mg/day	Yes	No	>=250 mg/day	No	Yes	Yes	Yes	Yes
Visit 1	129	90	69	69	250				15_017	Screening	37	125		86		75		250		37		48		47		1.02			15	Entered	62	Male	10NOV16	270	Placebo	<250 mg/day	No	No	<250 mg/day	No	Yes	Yes	Yes	No
Visit 2	125	86	75		250	47	48	1.02	15_017	Baseline	37	125		86		75		250		37		48		47		1.02			15	Entered	62	Male	10NOV16	270	Placebo	<250 mg/day	No	No	<250 mg/day	No	Yes	Yes	Yes	No
Visit 3	159	89	70		255	48	49.8	1.04	15_017	Week 6	37.7	125	34	86	3	75	-5	250	5	37	0.7	48	1.8	47	1	1.02	0.02		15	Entered	62	Male	10NOV16	270	Placebo	<250 mg/day	No	No	<250 mg/day	No	Yes	Yes	Yes	No
Visit 4	130	80	68		255	48	49	1.02	15_017	Week 12	37.7	125	5	86	-6	75	-7	250	5	37	0.7	48	1	47	1	1.02	0		15	Entered	62	Male	10NOV16	270	Placebo	<250 mg/day	No	No	<250 mg/day	No	Yes	Yes	Yes	No
Visit 5	135	85	85		258	48	51	1.06	15_017	Week 24	38.1	125	10	86	-1	75	10	250	8	37	1.1	48	3	47	1	1.02	0.04	Gaining Weight	15	Entered	62	Male	10NOV16	270	Placebo	<250 mg/day	No	No	<250 mg/day	No	Yes	Yes	Yes	No
Visit 1	121	80	89	67	178				15_018	Screening	27.9	136		77		83		182		28.5		43		43		1			15	Entered	57	Male	15NOV16	269	MF4637	<250 mg/day	No	No	<250 mg/day	No	Yes	Yes	Yes	Yes
Visit 2	136	77	83		182	43	43	1	15_018	Baseline	28.5	136		77		83		182		28.5		43		43		1			15	Entered	57	Male	15NOV16	269	MF4637	<250 mg/day	No	No	<250 mg/day	No	Yes	Yes	Yes	Yes
Visit 3	145	79	84		180	41.5	42.5	1.02	15_018	Week 6	28.2	136	9	77	2	83	1	182	-2	28.5	-0.3	43	-0.5	43	-1.5	1	0.02		15	Entered	57	Male	15NOV16	269	MF4637	<250 mg/day	No	No	<250 mg/day	No	Yes	Yes	Yes	Yes
Visit 4	131	73	75		184	40	41.5	1.04	15_018	Week 12	28.8	136	-5	77	-4	83	-8	182	2	28.5	0.3	43	-1.5	43	-3	1	0.04		15	Entered	57	Male	15NOV16	269	MF4637	<250 mg/day	No	No	<250 mg/day	No	Yes	Yes	Yes	Yes
Visit 5	130	85	90		180	41	43.5	1.06	15_018	Week 24	28.2	136	-6	77	8	83	7	182	-2	28.5	-0.3	43	0.5	43	-2	1	0.06	Losing Weight (0-5%)	15	Entered	57	Male	15NOV16	269	MF4637	<250 mg/day	No	No	<250 mg/day	No	Yes	Yes	Yes	Yes
Visit 1	115	78	65	63	201				15_019	Screening	35.6	117		81		71		213		37.8		39		43		0.91			15	Entered	38	Female	17NOV16	271	Placebo	<250 mg/day	No	No	>=250 mg/day	No	Yes	Yes	Yes	Yes
Visit 2	117	81	71		213	43	39	0.91	15_019	Baseline	37.8	117		81		71		213		37.8		39		43		0.91			15	Entered	38	Female	17NOV16	271	Placebo	<250 mg/day	No	No	>=250 mg/day	No	Yes	Yes	Yes	Yes
Visit 3	120	84	73		212	42	39	0.93	15_019	Week 6	37.6	117	3	81	3	71	2	213	-1	37.8	-0.2	39	0	43	-1	0.91	0.02		15	Entered	38	Female	17NOV16	271	Placebo	<250 mg/day	No	No	>=250 mg/day	No	Yes	Yes	Yes	Yes
Visit 4	117	81	77		211	43	41	0.95	15_019	Week 12	37.4	117	0	81	0	71	6	213	-2	37.8	-0.4	39	2	43	0	0.91	0.04		15	Entered	38	Female	17NOV16	271	Placebo	<250 mg/day	No	No	>=250 mg/day	No	Yes	Yes	Yes	Yes
Visit 5	115	80	78		209	43	40.7	0.95	15_019	Week 24	37.1	117	-2	81	-1	71	7	213	-4	37.8	-0.7	39	1.7	43	0	0.91	0.04	Losing Weight (0-5%)	15	Entered	38	Female	17NOV16	271	Placebo	<250 mg/day	No	No	>=250 mg/day	No	Yes	Yes	Yes	Yes
Visit 1	125	78	68	61	165				15_020	Screening	31.2	141		89		73		166		31.4		35		43		0.81			15	Early Termination	65	Female	30NOV16	272	MF4637	<250 mg/day	No	No	>=250 mg/day	No	Yes	Yes	Yes	Yes
Visit 2	141	89	73		166	43	35	0.81	15_020	Baseline	31.4	141		89		73		166		31.4		35		43		0.81			15	Early Termination	65	Female	30NOV16	272	MF4637	<250 mg/day	No	No	>=250 mg/day	No	Yes	Yes	Yes	Yes
Visit 3	140	81	72		165	44	35	0.8	15_020	Week 6	31.2	141	-1	89	-8	73	-1	166	-1	31.4	-0.2	35	0	43	1	0.81	-0.01		15	Early Termination	65	Female	30NOV16	272	MF4637	<250 mg/day	No	No	>=250 mg/day	No	Yes	Yes	Yes	Yes
Visit 4	144	87	74		166	46	36.8	0.8	15_020	Week 12	31.4	141	3	89	-2	73	1	166	0	31.4	0	35	1.8	43	3	0.81	-0.01		15	Early Termination	65	Female	30NOV16	272	MF4637	<250 mg/day	No	No	>=250 mg/day	No	Yes	Yes	Yes	Yes
Visit 1	125	76	78	69	235				15_021	Screening	34.7	125		82		82		273		40.4		45		44		1.02			15	Entered	41	Male	02DEC16	273	Placebo	<250 mg/day	No	No	>=250 mg/day	No	Yes	Yes	Yes	Yes
Visit 2	125	82	82		273	44	45	1.02	15_021	Baseline	40.4	125		82		82		273		40.4		45		44		1.02			15	Entered	41	Male	02DEC16	273	Placebo	<250 mg/day	No	No	>=250 mg/day	No	Yes	Yes	Yes	Yes
Visit 3	128	83	78		233	44	45	1.02	15_021	Week 6	34.4	125	3	82	1	82	-4	273	-40	40.4	-6	45	0	44	0	1.02	0		15	Entered	41	Male	02DEC16	273	Placebo	<250 mg/day	No	No	>=250 mg/day	No	Yes	Yes	Yes	Yes
Visit 4	136	89	63		264	45	47	1.04	15_021	Week 12	39	125	11	82	7	82	-19	273	-9	40.4	-1.4	45	2	44	1	1.02	0.02		15	Entered	41	Male	02DEC16	273	Placebo	<250 mg/day	No	No	>=250 mg/day	No	Yes	Yes	Yes	Yes
Visit 5	125	78	81		230	43	44	1.02	15_021	Week 24	34	125	0	82	-4	82	-1	273	-43	40.4	-6.4	45	-1	44	-1	1.02	0	Losing Weight (>5%)	15	Entered	41	Male	02DEC16	273	Placebo	<250 mg/day	No	No	>=250 mg/day	No	Yes	Yes	Yes	Yes
Visit 1	131	88	75	65	195				15_022	Screening	32.5	122		80		67		210		35		41.5		41		1.01			15	Entered	48	Male	09DEC16	274	Placebo	<250 mg/day	No	No	<250 mg/day	No	Yes	Yes	Yes	Yes
Visit 2	122	80	67		210	41	41.5	1.01	15_022	Baseline	35	122		80		67		210		35		41.5		41		1.01			15	Entered	48	Male	09DEC16	274	Placebo	<250 mg/day	No	No	<250 mg/day	No	Yes	Yes	Yes	Yes
Visit 3	124	83	75		206	40	41	1.02	15_022	Week 6	34.3	122	2	80	3	67	8	210	-4	35	-0.7	41.5	-0.5	41	-1	1.01	0.01		15	Entered	48	Male	09DEC16	274	Placebo	<250 mg/day	No	No	<250 mg/day	No	Yes	Yes	Yes	Yes
Visit 4	116	77	58		187	40	40	1	15_022	Week 12	31.1	122	-6	80	-3	67	-9	210	-23	35	-3.9	41.5	-1.5	41	-1	1.01	-0.01		15	Entered	48	Male	09DEC16	274	Placebo	<250 mg/day	No	No	<250 mg/day	No	Yes	Yes	Yes	Yes
Visit 5	124	80	70		185	40	40	1	15_022	Week 24	30.8	122	2	80	0	67	3	210	-25	35	-4.2	41.5	-1.5	41	-1	1.01	-0.01	Losing Weight (>5%)	15	Entered	48	Male	09DEC16	274	Placebo	<250 mg/day	No	No	<250 mg/day	No	Yes	Yes	Yes	Yes
Visit 1	146	71	52	65	176				15_023	Screening	29.3	150		81		68		174		29		39		48		0.81			15	Entered	58	Female	06DEC16	275	MF4637	<250 mg/day	No	No	>=250 mg/day	No	Yes	Yes	Yes	Yes
Visit 2	150	81	68		174	48	39	0.81	15_023	Baseline	29	150		81		68		174		29		39		48		0.81			15	Entered	58	Female	06DEC16	275	MF4637	<250 mg/day	No	No	>=250 mg/day	No	Yes	Yes	Yes	Yes
Visit 3	136	89	90		176	44	39	0.89	15_023	Week 6	29.3	150	-14	81	8	68	22	174	2	29	0.3	39	0	48	-4	0.81	0.08		15	Entered	58	Female	06DEC16	275	MF4637	<250 mg/day	No	No	>=250 mg/day	No	Yes	Yes	Yes	Yes
Visit 4	133	71	77		175	48	39	0.81	15_023	Week 12	29.1	150	-17	81	-10	68	9	174	1	29	0.1	39	0	48	0	0.81	0		15	Entered	58	Female	06DEC16	275	MF4637	<250 mg/day	No	No	>=250 mg/day	No	Yes	Yes	Yes	Yes
Visit 5	126	82	75		175	43	39	0.91	15_023	Week 24	29.1	150	-24	81	1	68	7	174	1	29	0.1	39	0	48	-5	0.81	0.1	Gaining Weight	15	Entered	58	Female	06DEC16	275	MF4637	<250 mg/day	No	No	>=250 mg/day	No	Yes	Yes	Yes	Yes
Visit 1	134	83	75	62	175				15_024	Screening	32	134		83		75		175		32									15	Screen Failure	74	Female							<250 mg/day	Yes	No	No	No	No
Visit 1	138	84	72	65	240				15_026	Screening	40	138		84		72		240		40									15	Screen Failure	70	Female							>=250 mg/day	Yes	No	No	No	No
Visit 1	126	82	72	68	205				16_001	Screening	31.2	128		81		67		205.9		31.3		41.5		40		1.04			16	Early Termination	53	Male	31OCT16	152	Placebo	<250 mg/day	No	No	<250 mg/day	No	Yes	Yes	Yes	Yes
Visit 2	128	81	67		205.9	40	41.5	1.04	16_001	Baseline	31.3	128		81		67		205.9		31.3		41.5		40		1.04			16	Early Termination	53	Male	31OCT16	152	Placebo	<250 mg/day	No	No	<250 mg/day	No	Yes	Yes	Yes	Yes
Visit 3	127	79	80		206.3	40.3	41.5	1.03	16_001	Week 6	31.4	128	-1	81	-2	67	13	205.9	0.4	31.3	0.1	41.5	0	40	0.3	1.04	-0.01		16	Early Termination	53	Male	31OCT16	152	Placebo	<250 mg/day	No	No	<250 mg/day	No	Yes	Yes	Yes	Yes
Visit 4	138	88	74		204.1	39.6	39.1	0.99	16_001	Week 12	31.1	128	10	81	7	67	7	205.9	-1.8	31.3	-0.2	41.5	-2.4	40	-0.4	1.04	-0.05		16	Early Termination	53	Male	31OCT16	152	Placebo	<250 mg/day	No	No	<250 mg/day	No	Yes	Yes	Yes	Yes
Visit 1	122	78	80	75	185				16_002	Screening	23.1	124		76		78		184.5		23.1		37.5		39.8		0.94			16	Early Termination	53	Male	03NOV16	154	MF4637	<250 mg/day	No	No	<250 mg/day	No	Yes	Yes	Yes	Yes
Visit 2	124	76	78		184.5	39.8	37.5	0.94	16_002	Baseline	23.1	124		76		78		184.5		23.1		37.5		39.8		0.94			16	Early Termination	53	Male	03NOV16	154	MF4637	<250 mg/day	No	No	<250 mg/day	No	Yes	Yes	Yes	Yes
Visit 3	128	81	69		183.8	39	39.2	1.01	16_002	Week 6	23	124	4	76	5	78	-9	184.5	-0.7	23.1	-0.1	37.5	1.7	39.8	-0.8	0.94	0.07		16	Early Termination	53	Male	03NOV16	154	MF4637	<250 mg/day	No	No	<250 mg/day	No	Yes	Yes	Yes	Yes
Visit 4	126	82	66		184.5	39.6	37.6	0.95	16_002	Week 12	23.1	124	2	76	6	78	-12	184.5	0	23.1	0	37.5	0.1	39.8	-0.2	0.94	0.01		16	Early Termination	53	Male	03NOV16	154	MF4637	<250 mg/day	No	No	<250 mg/day	No	Yes	Yes	Yes	Yes
Visit 1	110	60	63	66	185				16_003	Screening	29.9	108		64		72		184.1		29.7		39.4		41.1		0.96			16	Entered	59	Male	03NOV16	153	Placebo	>=250 mg/day	No	No	>=250 mg/day	No	Yes	Yes	Yes	Yes
Visit 2	108	64	72		184.1	41.1	39.4	0.96	16_003	Baseline	29.7	108		64		72		184.1		29.7		39.4		41.1		0.96			16	Entered	59	Male	03NOV16	153	Placebo	>=250 mg/day	No	No	>=250 mg/day	No	Yes	Yes	Yes	Yes
Visit 3	102	68	64		184.8	41.9	39.5	0.94	16_003	Week 6	29.9	108	-6	64	4	72	-8	184.1	0.7	29.7	0.2	39.4	0.1	41.1	0.8	0.96	-0.02		16	Entered	59	Male	03NOV16	153	Placebo	>=250 mg/day	No	No	>=250 mg/day	No	Yes	Yes	Yes	Yes
Visit 4	111	64	83		182	41.11	39.5	0.96	16_003	Week 12	29.4	108	3	64	0	72	11	184.1	-2.1	29.7	-0.3	39.4	0.1	41.1	0.01	0.96	0		16	Entered	59	Male	03NOV16	153	Placebo	>=250 mg/day	No	No	>=250 mg/day	No	Yes	Yes	Yes	Yes
Visit 5	100	60	69		191.4	42.5	40.2	0.95	16_003	Week 24	30.9	108	-8	64	-4	72	-3	184.1	7.3	29.7	1.2	39.4	0.8	41.1	1.4	0.96	-0.01	Gaining Weight	16	Entered	59	Male	03NOV16	153	Placebo	>=250 mg/day	No	No	>=250 mg/day	No	Yes	Yes	Yes	Yes
Visit 1	116	74	76	60	116.8				16_005	Screening	22.8	130		83		67		117		22.9		31.1		34.6		0.9			16	Entered	60	Male	12NOV16	155	MF4637	<250 mg/day	No	No	<250 mg/day	No	Yes	Yes	Yes	Yes
Visit 2	130	83	67		117	34.6	31.1	0.9	16_005	Baseline	22.9	130		83		67		117		22.9		31.1		34.6		0.9			16	Entered	60	Male	12NOV16	155	MF4637	<250 mg/day	No	No	<250 mg/day	No	Yes	Yes	Yes	Yes
Visit 3	123	82	72		116.8	34.4	30	0.87	16_005	Week 6	22.8	130	-7	83	-1	67	5	117	-0.2	22.9	-0.1	31.1	-1.1	34.6	-0.2	0.9	-0.03		16	Entered	60	Male	12NOV16	155	MF4637	<250 mg/day	No	No	<250 mg/day	No	Yes	Yes	Yes	Yes
Visit 4	126	83	69		119.7	34.2	31.1	0.91	16_005	Week 12	23.4	130	-4	83	0	67	2	117	2.7	22.9	0.5	31.1	0	34.6	-0.4	0.9	0.01		16	Entered	60	Male	12NOV16	155	MF4637	<250 mg/day	No	No	<250 mg/day	No	Yes	Yes	Yes	Yes
Visit 5	131	84	88		129	34.8	31.3	0.9	16_005	Week 24	25.2	130	1	83	1	67	21	117	12	22.9	2.3	31.1	0.2	34.6	0.2	0.9	0	Gaining Weight	16	Entered	60	Male	12NOV16	155	MF4637	<250 mg/day	No	No	<250 mg/day	No	Yes	Yes	Yes	Yes
Visit 1	133	84	62	67	182				16_007	Screening	28.5	130		82		74		182		28.5		40		48.1		0.83			16	Entered	57	Female	28NOV16	156	Placebo	>=250 mg/day	No	No	>=250 mg/day	No	Yes	Yes	Yes	Yes
Visit 2	130	82	74		182	48.1	40	0.83	16_007	Baseline	28.5	130		82		74		182		28.5		40		48.1		0.83			16	Entered	57	Female	28NOV16	156	Placebo	>=250 mg/day	No	No	>=250 mg/day	No	Yes	Yes	Yes	Yes
Visit 3	124	77	75		185.2	48	39.7	0.83	16_007	Week 6	29	130	-6	82	-5	74	1	182	3.2	28.5	0.5	40	-0.3	48.1	-0.1	0.83	0		16	Entered	57	Female	28NOV16	156	Placebo	>=250 mg/day	No	No	>=250 mg/day	No	Yes	Yes	Yes	Yes
Visit 4	126	78	75		186	44	41.8	0.95	16_007	Week 12	29.2	130	-4	82	-4	74	1	182	4	28.5	0.7	40	1.8	48.1	-4.1	0.83	0.12		16	Entered	57	Female	28NOV16	156	Placebo	>=250 mg/day	No	No	>=250 mg/day	No	Yes	Yes	Yes	Yes
Visit 5	133	83	74		181	44.2	39.4	0.89	16_007	Week 24	28.4	130	3	82	1	74	0	182	-1	28.5	-0.1	40	-0.6	48.1	-3.9	0.83	0.06	Losing Weight (0-5%)	16	Entered	57	Female	28NOV16	156	Placebo	>=250 mg/day	No	No	>=250 mg/day	No	Yes	Yes	Yes	Yes
Visit 1	123	76	81	66	196				16_008	Screening	31.7	122		88		87		196.2		31.7		43.3		49.5		0.87			16	Entered	58	Female	18NOV16	158	MF4637	>=250 mg/day	No	No	>=250 mg/day	No	Yes	Yes	Yes	Yes
Visit 2	122	88	87		196.2	49.5	43.3	0.87	16_008	Baseline	31.7	122		88		87		196.2		31.7		43.3		49.5		0.87			16	Entered	58	Female	18NOV16	158	MF4637	>=250 mg/day	No	No	>=250 mg/day	No	Yes	Yes	Yes	Yes
Visit 3	119	77	80		194.3	49.5	43	0.87	16_008	Week 6	31.4	122	-3	88	-11	87	-7	196.2	-1.9	31.7	-0.3	43.3	-0.3	49.5	0	0.87	0		16	Entered	58	Female	18NOV16	158	MF4637	>=250 mg/day	No	No	>=250 mg/day	No	Yes	Yes	Yes	Yes
Visit 4	122	76	82		199.1	49.1	43.1	0.88	16_008	Week 12	32.2	122	0	88	-12	87	-5	196.2	2.9	31.7	0.5	43.3	-0.2	49.5	-0.4	0.87	0.01		16	Entered	58	Female	18NOV16	158	MF4637	>=250 mg/day	No	No	>=250 mg/day	No	Yes	Yes	Yes	Yes
Visit 5	127	69	78		198	48.4	42.2	0.87	16_008	Week 24	32	122	5	88	-19	87	-9	196.2	1.8	31.7	0.3	43.3	-1.1	49.5	-1.1	0.87	0	Gaining Weight	16	Entered	58	Female	18NOV16	158	MF4637	>=250 mg/day	No	No	>=250 mg/day	No	Yes	Yes	Yes	Yes
Visit 1	134	76	63	67	215				17_001	Screening	33.7	137		79		61		215		33.7		49		45		1.09			17	Entered	71	Male	08NOV16	212	Placebo	<250 mg/day	No	No	<250 mg/day	No	Yes	Yes	Yes	Yes
Visit 2	137	79	61		215	45	49	1.09	17_001	Baseline	33.7	137		79		61		215		33.7		49		45		1.09			17	Entered	71	Male	08NOV16	212	Placebo	<250 mg/day	No	No	<250 mg/day	No	Yes	Yes	Yes	Yes
Visit 3	137	73	69		215	44	48	1.09	17_001	Week 6	33.7	137	0	79	-6	61	8	215	0	33.7	0	49	-1	45	-1	1.09	0		17	Entered	71	Male	08NOV16	212	Placebo	<250 mg/day	No	No	<250 mg/day	No	Yes	Yes	Yes	Yes
Visit 4	127	83	69		213	43	47	1.09	17_001	Week 12	33.4	137	-10	79	4	61	8	215	-2	33.7	-0.3	49	-2	45	-2	1.09	0		17	Entered	71	Male	08NOV16	212	Placebo	<250 mg/day	No	No	<250 mg/day	No	Yes	Yes	Yes	Yes
Visit 5	136	75	65		216	44	46	1.05	17_001	Week 24	33.9	137	-1	79	-4	61	4	215	1	33.7	0.2	49	-3	45	-1	1.09	-0.04	Gaining Weight	17	Entered	71	Male	08NOV16	212	Placebo	<250 mg/day	No	No	<250 mg/day	No	Yes	Yes	Yes	Yes
Visit 1	119	74	87	66	156				17_002	Screening	25.2	135		72		81		154		24.9		36		39		0.92			17	Entered	70	Female	10NOV16	192	MF4637	<250 mg/day	Yes	No	<250 mg/day	No	Yes	Yes	Yes	Yes
Visit 2	135	72	81		154	39	36	0.92	17_002	Baseline	24.9	135		72		81		154		24.9		36		39		0.92			17	Entered	70	Female	10NOV16	192	MF4637	<250 mg/day	Yes	No	<250 mg/day	No	Yes	Yes	Yes	Yes
Visit 3	137	82	71		152	38	35	0.92	17_002	Week 6	24.6	135	2	72	10	81	-10	154	-2	24.9	-0.3	36	-1	39	-1	0.92	0		17	Entered	70	Female	10NOV16	192	MF4637	<250 mg/day	Yes	No	<250 mg/day	No	Yes	Yes	Yes	Yes
Visit 4	130	82	83		150	38	36	0.95	17_002	Week 12	24.2	135	-5	72	10	81	2	154	-4	24.9	-0.7	36	0	39	-1	0.92	0.03		17	Entered	70	Female	10NOV16	192	MF4637	<250 mg/day	Yes	No	<250 mg/day	No	Yes	Yes	Yes	Yes
Visit 5	119	70	86		151	39	36	0.92	17_002	Week 24	24.4	135	-16	72	-2	81	5	154	-3	24.9	-0.5	36	0	39	0	0.92	0	Losing Weight (0-5%)	17	Entered	70	Female	10NOV16	192	MF4637	<250 mg/day	Yes	No	<250 mg/day	No	Yes	Yes	Yes	Yes
Visit 1	131	86	72	61	193				17_003	Screening	36.5	138		87		71		198		37.4		44		50		0.88			17	Entered	62	Female	10NOV16	193	MF4637	>=250 mg/day	Yes	No	<250 mg/day	No	Yes	Yes	Yes	Yes
Visit 2	138	87	71		198	50	44	0.88	17_003	Baseline	37.4	138		87		71		198		37.4		44		50		0.88			17	Entered	62	Female	10NOV16	193	MF4637	>=250 mg/day	Yes	No	<250 mg/day	No	Yes	Yes	Yes	Yes
Visit 3	127	83	69		197	50	43	0.86	17_003	Week 6	37.3	138	-11	87	-4	71	-2	198	-1	37.4	-0.1	44	-1	50	0	0.88	-0.02		17	Entered	62	Female	10NOV16	193	MF4637	>=250 mg/day	Yes	No	<250 mg/day	No	Yes	Yes	Yes	Yes
Visit 4	137	83	77		200	48	46	0.96	17_003	Week 12	37.8	138	-1	87	-4	71	6	198	2	37.4	0.4	44	2	50	-2	0.88	0.08		17	Entered	62	Female	10NOV16	193	MF4637	>=250 mg/day	Yes	No	<250 mg/day	No	Yes	Yes	Yes	Yes
Visit 5	138	86	81		198	48	45	0.94	17_003	Week 24	37.4	138	0	87	-1	71	10	198	0	37.4	0	44	1	50	-2	0.88	0.06	Losing Weight (0-5%)	17	Entered	62	Female	10NOV16	193	MF4637	>=250 mg/day	Yes	No	<250 mg/day	No	Yes	Yes	Yes	Yes
Visit 1	131	83	71	68	194				17_004	Screening	29.5	131		83		71		194		29.5									17	Screen Failure	65	Male							<250 mg/day	Yes	No	No	No	No
Visit 1	127	85	64	63	182				17_005	Screening	32.3	137		86		84		180		31.9		44		47		0.94			17	Entered	65	Female	16NOV16	213	MF4637	<250 mg/day	No	No	<250 mg/day	No	Yes	Yes	Yes	Yes
Visit 2	137	86	84		180	47	44	0.94	17_005	Baseline	31.9	137		86		84		180		31.9		44		47		0.94			17	Entered	65	Female	16NOV16	213	MF4637	<250 mg/day	No	No	<250 mg/day	No	Yes	Yes	Yes	Yes
Visit 3	127	83	71		178	46	42	0.91	17_005	Week 6	31.6	137	-10	86	-3	84	-13	180	-2	31.9	-0.3	44	-2	47	-1	0.94	-0.03		17	Entered	65	Female	16NOV16	213	MF4637	<250 mg/day	No	No	<250 mg/day	No	Yes	Yes	Yes	Yes
Visit 4	130	83	73		181	47	45	0.96	17_005	Week 12	32.1	137	-7	86	-3	84	-11	180	1	31.9	0.2	44	1	47	0	0.94	0.02		17	Entered	65	Female	16NOV16	213	MF4637	<250 mg/day	No	No	<250 mg/day	No	Yes	Yes	Yes	Yes
Visit 5	121	73	71		179	46	43	0.93	17_005	Week 24	31.7	137	-16	86	-13	84	-13	180	-1	31.9	-0.2	44	-1	47	-1	0.94	-0.01	Losing Weight (0-5%)	17	Entered	65	Female	16NOV16	213	MF4637	<250 mg/day	No	No	<250 mg/day	No	Yes	Yes	Yes	Yes
Visit 1	123	77	65	60	164				17_006	Screening	32.1	121		83		79		162		31.7		40		45		0.89			17	Entered	61	Female	21NOV16	194	Placebo	<250 mg/day	No	No	<250 mg/day	No	Yes	Yes	Yes	Yes
Visit 2	121	83	79		162	45	40	0.89	17_006	Baseline	31.7	121		83		79		162		31.7		40		45		0.89			17	Entered	61	Female	21NOV16	194	Placebo	<250 mg/day	No	No	<250 mg/day	No	Yes	Yes	Yes	Yes
Visit 3	121	76	69		160	43	39	0.91	17_006	Week 6	31.3	121	0	83	-7	79	-10	162	-2	31.7	-0.4	40	-1	45	-2	0.89	0.02		17	Entered	61	Female	21NOV16	194	Placebo	<250 mg/day	No	No	<250 mg/day	No	Yes	Yes	Yes	Yes
Visit 4	128	73	71		162	45	39	0.87	17_006	Week 12	31.7	121	7	83	-10	79	-8	162	0	31.7	0	40	-1	45	0	0.89	-0.02		17	Entered	61	Female	21NOV16	194	Placebo	<250 mg/day	No	No	<250 mg/day	No	Yes	Yes	Yes	Yes
Visit 5	120	81	86		163	45	40	0.89	17_006	Week 24	31.9	121	-1	83	-2	79	7	162	1	31.7	0.2	40	0	45	0	0.89	0	Gaining Weight	17	Entered	61	Female	21NOV16	194	Placebo	<250 mg/day	No	No	<250 mg/day	No	Yes	Yes	Yes	Yes
Visit 1	119	79	73	68	230				17_007	Screening	35	121		76		69		230		35		44		40		1.1			17	Entered	61	Male	21NOV16	214	MF4637	<250 mg/day	No	No	<250 mg/day	No	Yes	Yes	Yes	Yes
Visit 2	121	76	69		230	40	44	1.1	17_007	Baseline	35	121		76		69		230		35		44		40		1.1			17	Entered	61	Male	21NOV16	214	MF4637	<250 mg/day	No	No	<250 mg/day	No	Yes	Yes	Yes	Yes
Visit 3	131	76	81		227	39	43	1.1	17_007	Week 6	34.5	121	10	76	0	69	12	230	-3	35	-0.5	44	-1	40	-1	1.1	0		17	Entered	61	Male	21NOV16	214	MF4637	<250 mg/day	No	No	<250 mg/day	No	Yes	Yes	Yes	Yes
Visit 4	126	73	75		230	46	45	0.98	17_007	Week 12	35	121	5	76	-3	69	6	230	0	35	0	44	1	40	6	1.1	-0.12		17	Entered	61	Male	21NOV16	214	MF4637	<250 mg/day	No	No	<250 mg/day	No	Yes	Yes	Yes	Yes
Visit 5	123	74	71		230	43	45	1.05	17_007	Week 24	35	121	2	76	-2	69	2	230	0	35	0	44	1	40	3	1.1	-0.05	Losing Weight (0-5%)	17	Entered	61	Male	21NOV16	214	MF4637	<250 mg/day	No	No	<250 mg/day	No	Yes	Yes	Yes	Yes
Visit 1	123	81	67	55	110				17_008	Screening	25.6	138		82		69		103		24		34		39		0.87			17	Entered	67	Female	25NOV16	195	Placebo	<250 mg/day	Yes	No	<250 mg/day	No	Yes	Yes	Yes	Yes
Visit 2	138	82	69		103	39	34	0.87	17_008	Baseline	24	138		82		69		103		24		34		39		0.87			17	Entered	67	Female	25NOV16	195	Placebo	<250 mg/day	Yes	No	<250 mg/day	No	Yes	Yes	Yes	Yes
Visit 3	129	86	73		105	38	34	0.89	17_008	Week 6	24.4	138	-9	82	4	69	4	103	2	24	0.4	34	0	39	-1	0.87	0.02		17	Entered	67	Female	25NOV16	195	Placebo	<250 mg/day	Yes	No	<250 mg/day	No	Yes	Yes	Yes	Yes
Visit 4	130	78	68		110	40	33	0.82	17_008	Week 12	25.6	138	-8	82	-4	69	-1	103	7	24	1.6	34	-1	39	1	0.87	-0.05		17	Entered	67	Female	25NOV16	195	Placebo	<250 mg/day	Yes	No	<250 mg/day	No	Yes	Yes	Yes	Yes
Visit 5	124	77	82		109	39	34	0.87	17_008	Week 24	25.4	138	-14	82	-5	69	13	103	6	24	1.4	34	0	39	0	0.87	0	Gaining Weight	17	Entered	67	Female	25NOV16	195	Placebo	<250 mg/day	Yes	No	<250 mg/day	No	Yes	Yes	Yes	Yes
Visit 1	139	89	61	66	224				17_009	Screening	36.2	137		85		57		225		36.3		46		44		1.05			17	Entered	70	Male	25NOV16	215	Placebo	<250 mg/day	No	No	<250 mg/day	No	Yes	Yes	Yes	Yes
Visit 2	137	85	57		225	44	46	1.05	17_009	Baseline	36.3	137		85		57		225		36.3		46		44		1.05			17	Entered	70	Male	25NOV16	215	Placebo	<250 mg/day	No	No	<250 mg/day	No	Yes	Yes	Yes	Yes
Visit 3	138	77	69		225	44	46	1.05	17_009	Week 6	36.3	137	1	85	-8	57	12	225	0	36.3	0	46	0	44	0	1.05	0		17	Entered	70	Male	25NOV16	215	Placebo	<250 mg/day	No	No	<250 mg/day	No	Yes	Yes	Yes	Yes
Visit 4	140	83	68		224	46	48	1.04	17_009	Week 12	36.2	137	3	85	-2	57	11	225	-1	36.3	-0.1	46	2	44	2	1.05	-0.01		17	Entered	70	Male	25NOV16	215	Placebo	<250 mg/day	No	No	<250 mg/day	No	Yes	Yes	Yes	Yes
Visit 5	139	86	74		219	47	45	0.96	17_009	Week 24	35.4	137	2	85	1	57	17	225	-6	36.3	-0.9	46	-1	44	3	1.05	-0.09	Losing Weight (0-5%)	17	Entered	70	Male	25NOV16	215	Placebo	<250 mg/day	No	No	<250 mg/day	No	Yes	Yes	Yes	Yes
Visit 1	131	82	78	61	164				17_010	Screening	31	126		79		75		162		30.6		39		44		0.89			17	Entered	68	Female	25NOV16	230	MF4637	<250 mg/day	No	No	<250 mg/day	No	Yes	Yes	Yes	Yes
Visit 2	126	79	75		162	44	39	0.89	17_010	Baseline	30.6	126		79		75		162		30.6		39		44		0.89			17	Entered	68	Female	25NOV16	230	MF4637	<250 mg/day	No	No	<250 mg/day	No	Yes	Yes	Yes	Yes
Visit 3	123	78	68		160	42	38	0.9	17_010	Week 6	30.3	126	-3	79	-1	75	-7	162	-2	30.6	-0.3	39	-1	44	-2	0.89	0.01		17	Entered	68	Female	25NOV16	230	MF4637	<250 mg/day	No	No	<250 mg/day	No	Yes	Yes	Yes	Yes
Visit 4	138	81	73		164	42	39	0.93	17_010	Week 12	31	126	12	79	2	75	-2	162	2	30.6	0.4	39	0	44	-2	0.89	0.04		17	Entered	68	Female	25NOV16	230	MF4637	<250 mg/day	No	No	<250 mg/day	No	Yes	Yes	Yes	Yes
Visit 5	133	83	80		165	46	41	0.89	17_010	Week 24	31.2	126	7	79	4	75	5	162	3	30.6	0.6	39	2	44	2	0.89	0	Gaining Weight	17	Entered	68	Female	25NOV16	230	MF4637	<250 mg/day	No	No	<250 mg/day	No	Yes	Yes	Yes	Yes
Visit 1	132	87	69	63	195				17_011	Screening	34.6	132		87		69		195		34.6									17	Screen Failure	58	Female							<250 mg/day	Yes	No	No	No	No
Visit 1	139	93	60	63	142.3				18_001	Screening	25.2	137		87		57		143		25.4		34		37		0.92			18	Entered	46	Female	18OCT16	220	Placebo	<250 mg/day	No	No	<250 mg/day	No	Yes	Yes	Yes	Yes
Visit 2	137	87	57		143	37	34	0.92	18_001	Baseline	25.4	137		87		57		143		25.4		34		37		0.92			18	Entered	46	Female	18OCT16	220	Placebo	<250 mg/day	No	No	<250 mg/day	No	Yes	Yes	Yes	Yes
Visit 3	138	87	80		145.4	37	35	0.95	18_001	Week 6	25.8	137	1	87	0	57	23	143	2.4	25.4	0.4	34	1	37	0	0.92	0.03		18	Entered	46	Female	18OCT16	220	Placebo	<250 mg/day	No	No	<250 mg/day	No	Yes	Yes	Yes	Yes
Visit 4	126	93	66		148.4	38	35	0.92	18_001	Week 12	26.3	137	-11	87	6	57	9	143	5.4	25.4	0.9	34	1	37	1	0.92	0		18	Entered	46	Female	18OCT16	220	Placebo	<250 mg/day	No	No	<250 mg/day	No	Yes	Yes	Yes	Yes
Visit 5	144	93	63		147.6	39	35	0.9	18_001	Week 24	26.2	137	7	87	6	57	6	143	4.6	25.4	0.8	34	1	37	2	0.92	-0.02	Gaining Weight	18	Entered	46	Female	18OCT16	220	Placebo	<250 mg/day	No	No	<250 mg/day	No	Yes	Yes	Yes	Yes
Visit 1	111	78	66	60	136.6				18_002	Screening	26.7	123		80		80		138.8		27.1		38		42		0.9			18	Entered	52	Female	24OCT16	222	MF4637	<250 mg/day	No	No	<250 mg/day	No	Yes	Yes	Yes	Yes
Visit 2	123	80	80		138.8	42	38	0.9	18_002	Baseline	27.1	123		80		80		138.8		27.1		38		42		0.9			18	Entered	52	Female	24OCT16	222	MF4637	<250 mg/day	No	No	<250 mg/day	No	Yes	Yes	Yes	Yes
Visit 3	122	81	74		142.8	42	37.5	0.89	18_002	Week 6	27.9	123	-1	80	1	80	-6	138.8	4	27.1	0.8	38	-0.5	42	0	0.9	-0.01		18	Entered	52	Female	24OCT16	222	MF4637	<250 mg/day	No	No	<250 mg/day	No	Yes	Yes	Yes	Yes
Visit 4	118	76	64		140	43	37	0.86	18_002	Week 12	27.4	123	-5	80	-4	80	-16	138.8	1.2	27.1	0.3	38	-1	42	1	0.9	-0.04		18	Entered	52	Female	24OCT16	222	MF4637	<250 mg/day	No	No	<250 mg/day	No	Yes	Yes	Yes	Yes
Visit 5	139	89	72		142.2	43	37	0.86	18_002	Week 24	27.8	123	16	80	9	80	-8	138.8	3.4	27.1	0.7	38	-1	42	1	0.9	-0.04	Gaining Weight	18	Entered	52	Female	24OCT16	222	MF4637	<250 mg/day	No	No	<250 mg/day	No	Yes	Yes	Yes	Yes
Visit 1	118	74	80	60	127.6				18_003	Screening	24.9	130		82		74		128.6		25.1		32		37		0.86			18	Entered	55	Female	26OCT16	221	Placebo	>=250 mg/day	Yes	Yes	>=250 mg/day	No	Yes	Yes	Yes	Yes
Visit 2	130	82	74		128.6	37	32	0.86	18_003	Baseline	25.1	130		82		74		128.6		25.1		32		37		0.86			18	Entered	55	Female	26OCT16	221	Placebo	>=250 mg/day	Yes	Yes	>=250 mg/day	No	Yes	Yes	Yes	Yes
Visit 3	115	82	65		130.8	39	35	0.9	18_003	Week 6	25.6	130	-15	82	0	74	-9	128.6	2.2	25.1	0.5	32	3	37	2	0.86	0.04		18	Entered	55	Female	26OCT16	221	Placebo	>=250 mg/day	Yes	Yes	>=250 mg/day	No	Yes	Yes	Yes	Yes
Visit 4	124	86	63		132	39	34	0.87	18_003	Week 12	25.8	130	-6	82	4	74	-11	128.6	3.4	25.1	0.7	32	2	37	2	0.86	0.01		18	Entered	55	Female	26OCT16	221	Placebo	>=250 mg/day	Yes	Yes	>=250 mg/day	No	Yes	Yes	Yes	Yes
Visit 5	156	94	58		140.2	39	35	0.9	18_003	Week 24	27.4	130	26	82	12	74	-16	128.6	11.6	25.1	2.3	32	3	37	2	0.86	0.04	Gaining Weight	18	Entered	55	Female	26OCT16	221	Placebo	>=250 mg/day	Yes	Yes	>=250 mg/day	No	Yes	Yes	Yes	Yes
Visit 1	126	81	81	61	160				19_001	Screening	30.3	129		86		83		160		30.3		40		37		1.08			19	Entered	53	Female	28OCT16	225	Placebo	<250 mg/day	No	No	>=250 mg/day	No	Yes	Yes	Yes	Yes
Visit 2	129	86	83		160	37	40	1.08	19_001	Baseline	30.3	129		86		83		160		30.3		40		37		1.08			19	Entered	53	Female	28OCT16	225	Placebo	<250 mg/day	No	No	>=250 mg/day	No	Yes	Yes	Yes	Yes
Visit 3	129	70	63		161	37	40	1.08	19_001	Week 6	30.4	129	0	86	-16	83	-20	160	1	30.3	0.1	40	0	37	0	1.08	0		19	Entered	53	Female	28OCT16	225	Placebo	<250 mg/day	No	No	>=250 mg/day	No	Yes	Yes	Yes	Yes
Visit 4	127	82	71		160	37	40	1.08	19_001	Week 12	30.3	129	-2	86	-4	83	-12	160	0	30.3	0	40	0	37	0	1.08	0		19	Entered	53	Female	28OCT16	225	Placebo	<250 mg/day	No	No	>=250 mg/day	No	Yes	Yes	Yes	Yes
Visit 5	129	71	82		156	36	39	1.08	19_001	Week 24	29.5	129	0	86	-15	83	-1	160	-4	30.3	-0.8	40	-1	37	-1	1.08	0	Losing Weight (0-5%)	19	Entered	53	Female	28OCT16	225	Placebo	<250 mg/day	No	No	>=250 mg/day	No	Yes	Yes	Yes	Yes
Visit 1	121	80	79	67	170				19_002	Screening	26.6	122		78		69		171		26.8		41		38		1.08			19	Entered	37	Male	27OCT16	224	MF4637	<250 mg/day	No	No	<250 mg/day	No	Yes	Yes	Yes	Yes
Visit 2	122	78	69		171	38	41	1.08	19_002	Baseline	26.8	122		78		69		171		26.8		41		38		1.08			19	Entered	37	Male	27OCT16	224	MF4637	<250 mg/day	No	No	<250 mg/day	No	Yes	Yes	Yes	Yes
Visit 3	121	83	83		171	38	41	1.08	19_002	Week 6	26.8	122	-1	78	5	69	14	171	0	26.8	0	41	0	38	0	1.08	0		19	Entered	37	Male	27OCT16	224	MF4637	<250 mg/day	No	No	<250 mg/day	No	Yes	Yes	Yes	Yes
Visit 4	118	83	71		169	38	40	1.05	19_002	Week 12	26.5	122	-4	78	5	69	2	171	-2	26.8	-0.3	41	-1	38	0	1.08	-0.03		19	Entered	37	Male	27OCT16	224	MF4637	<250 mg/day	No	No	<250 mg/day	No	Yes	Yes	Yes	Yes
Visit 5	126	72	81		166	37	40	1.08	19_002	Week 24	26	122	4	78	-6	69	12	171	-5	26.8	-0.8	41	-1	38	-1	1.08	0	Losing Weight (0-5%)	19	Entered	37	Male	27OCT16	224	MF4637	<250 mg/day	No	No	<250 mg/day	No	Yes	Yes	Yes	Yes
Visit 1	129	76	86	65	189				19_003	Screening	31.5	129		76		86		189		31.5									19	Screen Failure	59	Female							>=250 mg/day	Yes	No	No	No	No
Visit 1	129	76	78	64	161				19_004	Screening	27.7	130		77		79		160		27.5		38		42		0.9			19	Entered	53	Female	04NOV16	226	MF4637	<250 mg/day	No	No	>=250 mg/day	No	Yes	Yes	Yes	Yes
Visit 2	130	77	79		160	42	38	0.9	19_004	Baseline	27.5	130		77		79		160		27.5		38		42		0.9			19	Entered	53	Female	04NOV16	226	MF4637	<250 mg/day	No	No	>=250 mg/day	No	Yes	Yes	Yes	Yes
Visit 3	119	78	66		158	41	38	0.93	19_004	Week 6	27.1	130	-11	77	1	79	-13	160	-2	27.5	-0.4	38	0	42	-1	0.9	0.03		19	Entered	53	Female	04NOV16	226	MF4637	<250 mg/day	No	No	>=250 mg/day	No	Yes	Yes	Yes	Yes
Visit 4	124	75	69		157	41	37	0.9	19_004	Week 12	27	130	-6	77	-2	79	-10	160	-3	27.5	-0.5	38	-1	42	-1	0.9	0		19	Entered	53	Female	04NOV16	226	MF4637	<250 mg/day	No	No	>=250 mg/day	No	Yes	Yes	Yes	Yes
Visit 5	129	76	81		155	40	37	0.92	19_004	Week 24	26.6	130	-1	77	-1	79	2	160	-5	27.5	-0.9	38	-1	42	-2	0.9	0.02	Losing Weight (0-5%)	19	Entered	53	Female	04NOV16	226	MF4637	<250 mg/day	No	No	>=250 mg/day	No	Yes	Yes	Yes	Yes
Visit 1	127	86	83	68	185				19_005	Screening	28.2	122		82		83		186		28.3		39		37		1.05			19	Entered	51	Male	04NOV16	227	Placebo	<250 mg/day	No	No	<250 mg/day	No	Yes	Yes	Yes	Yes
Visit 2	122	82	83		186	37	39	1.05	19_005	Baseline	28.3	122		82		83		186		28.3		39		37		1.05			19	Entered	51	Male	04NOV16	227	Placebo	<250 mg/day	No	No	<250 mg/day	No	Yes	Yes	Yes	Yes
Visit 3	117	76	83		185	37	39	1.05	19_005	Week 6	28.2	122	-5	82	-6	83	0	186	-1	28.3	-0.1	39	0	37	0	1.05	0		19	Entered	51	Male	04NOV16	227	Placebo	<250 mg/day	No	No	<250 mg/day	No	Yes	Yes	Yes	Yes
Visit 4	119	80	62		184	37	39	1.05	19_005	Week 12	28	122	-3	82	-2	83	-21	186	-2	28.3	-0.3	39	0	37	0	1.05	0		19	Entered	51	Male	04NOV16	227	Placebo	<250 mg/day	No	No	<250 mg/day	No	Yes	Yes	Yes	Yes
Visit 5	122	83	71		181	36	38	1.06	19_005	Week 24	27.5	122	0	82	1	83	-12	186	-5	28.3	-0.8	39	-1	37	-1	1.05	0.01	Losing Weight (0-5%)	19	Entered	51	Male	04NOV16	227	Placebo	<250 mg/day	No	No	<250 mg/day	No	Yes	Yes	Yes	Yes
Visit 1	127	87	76	64	189				19_006	Screening	32.5	127		87		76		189		32.5									19	Screen Failure	73	Male							<250 mg/day	Yes	No	No	No	No
Visit 1	129	79	70	66	189				19_007	Screening	30.5	119		86		76		188		30.4		42		38		1.11			19	Entered	50	Male	21NOV16	289	MF4637	<250 mg/day	No	No	>=250 mg/day	No	Yes	Yes	Yes	Yes
Visit 2	119	86	76		188	38	42	1.11	19_007	Baseline	30.4	119		86		76		188		30.4		42		38		1.11			19	Entered	50	Male	21NOV16	289	MF4637	<250 mg/day	No	No	>=250 mg/day	No	Yes	Yes	Yes	Yes
Visit 3	124	81	76		187	38	41	1.08	19_007	Week 6	30.2	119	5	86	-5	76	0	188	-1	30.4	-0.2	42	-1	38	0	1.11	-0.03		19	Entered	50	Male	21NOV16	289	MF4637	<250 mg/day	No	No	>=250 mg/day	No	Yes	Yes	Yes	Yes
Visit 4	120	70	64		184	37	41	1.11	19_007	Week 12	29.7	119	1	86	-16	76	-12	188	-4	30.4	-0.7	42	-1	38	-1	1.11	0		19	Entered	50	Male	21NOV16	289	MF4637	<250 mg/day	No	No	>=250 mg/day	No	Yes	Yes	Yes	Yes
Visit 5	119	85	76		181	36	40	1.11	19_007	Week 24	29.2	119	0	86	-1	76	0	188	-7	30.4	-1.2	42	-2	38	-2	1.11	0	Losing Weight (0-5%)	19	Entered	50	Male	21NOV16	289	MF4637	<250 mg/day	No	No	>=250 mg/day	No	Yes	Yes	Yes	Yes
Visit 1	131	89	88	64	142				19_008	Screening	24.4	131		89		88		142		24.4									19	Screen Failure	65	Female							>=250 mg/day	Yes	No	No	No	No
Visit 1	114	69	67	64	159				19_009	Screening	27.3	129		83		76		160		27.5		39		40		0.98			19	Entered	49	Female	21NOV16	290	Placebo	<250 mg/day	No	No	>=250 mg/day	No	Yes	Yes	Yes	Yes
Visit 2	129	83	76		160	40	39	0.98	19_009	Baseline	27.5	129		83		76		160		27.5		39		40		0.98			19	Entered	49	Female	21NOV16	290	Placebo	<250 mg/day	No	No	>=250 mg/day	No	Yes	Yes	Yes	Yes
Visit 3	123	72	81		157	39	38	0.97	19_009	Week 6	27	129	-6	83	-11	76	5	160	-3	27.5	-0.5	39	-1	40	-1	0.98	-0.01		19	Entered	49	Female	21NOV16	290	Placebo	<250 mg/day	No	No	>=250 mg/day	No	Yes	Yes	Yes	Yes
Visit 4	129	69	72		155	38	38	1	19_009	Week 12	26.6	129	0	83	-14	76	-4	160	-5	27.5	-0.9	39	-1	40	-2	0.98	0.02		19	Entered	49	Female	21NOV16	290	Placebo	<250 mg/day	No	No	>=250 mg/day	No	Yes	Yes	Yes	Yes
Visit 5	127	82	76		151	36	37	1.03	19_009	Week 24	25.9	129	-2	83	-1	76	0	160	-9	27.5	-1.6	39	-2	40	-4	0.98	0.05	Losing Weight (>5%)	19	Entered	49	Female	21NOV16	290	Placebo	<250 mg/day	No	No	>=250 mg/day	No	Yes	Yes	Yes	Yes
Visit 1	129	86	77	71	216				19_010	Screening	30.2	118		84		72		216		30.2		42		41		1.02			19	Entered	33	Male	21NOV16	291	MF4637	<250 mg/day	No	No	>=250 mg/day	No	Yes	Yes	Yes	Yes
Visit 2	118	84	72		216	41	42	1.02	19_010	Baseline	30.2	118		84		72		216		30.2		42		41		1.02			19	Entered	33	Male	21NOV16	291	MF4637	<250 mg/day	No	No	>=250 mg/day	No	Yes	Yes	Yes	Yes
Visit 3	124	83	76		214	40	41	1.02	19_010	Week 6	29.9	118	6	84	-1	72	4	216	-2	30.2	-0.3	42	-1	41	-1	1.02	0		19	Entered	33	Male	21NOV16	291	MF4637	<250 mg/day	No	No	>=250 mg/day	No	Yes	Yes	Yes	Yes
Visit 4	119	83	71		212	40	40	1	19_010	Week 12	29.6	118	1	84	-1	72	-1	216	-4	30.2	-0.6	42	-2	41	-1	1.02	-0.02		19	Entered	33	Male	21NOV16	291	MF4637	<250 mg/day	No	No	>=250 mg/day	No	Yes	Yes	Yes	Yes
Visit 5	124	85	72		210	39	40	1.03	19_010	Week 24	29.3	118	6	84	1	72	0	216	-6	30.2	-0.9	42	-2	41	-2	1.02	0.01	Losing Weight (0-5%)	19	Entered	33	Male	21NOV16	291	MF4637	<250 mg/day	No	No	>=250 mg/day	No	Yes	Yes	Yes	Yes
Visit 1	129	60	59	62	176				19_011	Screening	32.2	129		60		59		176		32.2									19	Screen Failure	72	Female							>=250 mg/day	Yes	No	No	No	No
Visit 1	129	76	83	67	240				19_012	Screening	37.6	123		86		75		240		37.6		43		50		0.86			19	Entered	55	Female	21NOV16	288	Placebo	<250 mg/day	Yes	No	>=250 mg/day	No	Yes	Yes	Yes	Yes
Visit 2	123	86	75		240	50	43	0.86	19_012	Baseline	37.6	123		86		75		240		37.6		43		50		0.86			19	Entered	55	Female	21NOV16	288	Placebo	<250 mg/day	Yes	No	>=250 mg/day	No	Yes	Yes	Yes	Yes
Visit 3	130	81	73		238	49	42	0.86	19_012	Week 6	37.3	123	7	86	-5	75	-2	240	-2	37.6	-0.3	43	-1	50	-1	0.86	0		19	Entered	55	Female	21NOV16	288	Placebo	<250 mg/day	Yes	No	>=250 mg/day	No	Yes	Yes	Yes	Yes
Visit 4	129	83	72		231	47	41	0.87	19_012	Week 12	36.2	123	6	86	-3	75	-3	240	-9	37.6	-1.4	43	-2	50	-3	0.86	0.01		19	Entered	55	Female	21NOV16	288	Placebo	<250 mg/day	Yes	No	>=250 mg/day	No	Yes	Yes	Yes	Yes
Visit 5	126	84	76		223	45	39	0.87	19_012	Week 24	35	123	3	86	-2	75	1	240	-17	37.6	-2.6	43	-4	50	-5	0.86	0.01	Losing Weight (>5%)	19	Entered	55	Female	21NOV16	288	Placebo	<250 mg/day	Yes	No	>=250 mg/day	No	Yes	Yes	Yes	Yes
Visit 1	127	86	75	64	213				19_013	Screening	36.6	127		86		75		213		36.6									19	Screen Failure	65	Female							>=250 mg/day	Yes	No	No	No	No
