# Supplementary material for: Evaluation of a High Concentrate Omega-3 for Correcting the Omega-3 Fatty Acid Nutritional Deficiency in Non-alcoholic Fatty Liver Disease and effects on Hepatic Steatosis (CONDIN)
Source: Preprints.org preprint supplement (doi:10.20944/preprints201807.0240.v1), 2018-07-13
Supplement: Supplementary file 19 [file contents.xlsx]

## Sheet: contents
LIBNAME	MEMNAME	MEMLABEL	TYPEMEM	NAME	TYPE	LENGTH	VARNUM	LABEL	FORMAT	FORMATL	FORMATD	INFORMAT	INFORML	INFORMD	JUST	NPOS	NOBS	ENGINE	CRDATE	MODATE	DELOBS	IDXUSAGE	MEMTYPE	IDXCOUNT	PROTECT	FLAGS	COMPRESS	REUSE	SORTED	SORTEDBY	CHARSET	COLLATE	NODUPKEY	NODUPREC	ENCRYPT	POINTOBS	GENMAX	GENNUM	GENNEXT	TRANSCOD
SMR3571	AE	Adverse Events		AESPID	1	3	1	AE Identifier		0	0		0	0	0	176	91	V9	2017-10-13 16:55:46	2017-10-13 16:55:46	0	NONE	DATA	0	---	---	NO	NO					NO	NO	NO	YES	0			YES
SMR3571	AE	Adverse Events		AETERM	2	38	2	AE Term		0	0		0	0	0	182	91	V9	2017-10-13 16:55:46	2017-10-13 16:55:46	0	NONE	DATA	0	---	---	NO	NO					NO	NO	NO	YES	0			YES
SMR3571	AE	Adverse Events		AELLT	2	36	3	Lowest Level Term		0	0		0	0	0	220	91	V9	2017-10-13 16:55:46	2017-10-13 16:55:46	0	NONE	DATA	0	---	---	NO	NO					NO	NO	NO	YES	0			YES
SMR3571	AE	Adverse Events		AELLTCD	2	8	4	Lowest Level Term Code		0	0		0	0	0	256	91	V9	2017-10-13 16:55:46	2017-10-13 16:55:46	0	NONE	DATA	0	---	---	NO	NO					NO	NO	NO	YES	0			YES
SMR3571	AE	Adverse Events		AEPT	2	43	5	Preferred Term		0	0		0	0	0	264	91	V9	2017-10-13 16:55:46	2017-10-13 16:55:46	0	NONE	DATA	0	---	---	NO	NO					NO	NO	NO	YES	0			YES
SMR3571	AE	Adverse Events		AEPTCD	2	8	6	Preferred Term Code		0	0		0	0	0	307	91	V9	2017-10-13 16:55:46	2017-10-13 16:55:46	0	NONE	DATA	0	---	---	NO	NO					NO	NO	NO	YES	0			YES
SMR3571	AE	Adverse Events		AEHLT	2	64	7	High Level Term		0	0		0	0	0	315	91	V9	2017-10-13 16:55:46	2017-10-13 16:55:46	0	NONE	DATA	0	---	---	NO	NO					NO	NO	NO	YES	0			YES
SMR3571	AE	Adverse Events		AEHLTCD	2	8	8	High Level Term Code		0	0		0	0	0	379	91	V9	2017-10-13 16:55:46	2017-10-13 16:55:46	0	NONE	DATA	0	---	---	NO	NO					NO	NO	NO	YES	0			YES
SMR3571	AE	Adverse Events		AEHLGT	2	63	9	High Level Group Term		0	0		0	0	0	387	91	V9	2017-10-13 16:55:46	2017-10-13 16:55:46	0	NONE	DATA	0	---	---	NO	NO					NO	NO	NO	YES	0			YES
SMR3571	AE	Adverse Events		AEHLGTCD	2	8	10	High Level Group Term Code		0	0		0	0	0	450	91	V9	2017-10-13 16:55:46	2017-10-13 16:55:46	0	NONE	DATA	0	---	---	NO	NO					NO	NO	NO	YES	0			YES
SMR3571	AE	Adverse Events		AESOC	2	52	11	System Organ Class		0	0		0	0	0	458	91	V9	2017-10-13 16:55:46	2017-10-13 16:55:46	0	NONE	DATA	0	---	---	NO	NO					NO	NO	NO	YES	0			YES
SMR3571	AE	Adverse Events		AESOCCD	2	8	12	System Organ Class Code		0	0		0	0	0	510	91	V9	2017-10-13 16:55:46	2017-10-13 16:55:46	0	NONE	DATA	0	---	---	NO	NO					NO	NO	NO	YES	0			YES
SMR3571	AE	Adverse Events		AEACNOTH	2	21	13	Specify other/multiple action(s)		0	0		0	0	0	518	91	V9	2017-10-13 16:55:46	2017-10-13 16:55:46	0	NONE	DATA	0	---	---	NO	NO					NO	NO	NO	YES	0			YES
SMR3571	AE	Adverse Events		AEACN	1	8	14	Action Taken with Intervention	AEACN	0	0		0	0	0	0	91	V9	2017-10-13 16:55:46	2017-10-13 16:55:46	0	NONE	DATA	0	---	---	NO	NO					NO	NO	NO	YES	0			YES
SMR3571	AE	Adverse Events		AEONGO	1	8	15	Ongoing	YN	0	0		0	0	0	8	91	V9	2017-10-13 16:55:46	2017-10-13 16:55:46	0	NONE	DATA	0	---	---	NO	NO					NO	NO	NO	YES	0			YES
SMR3571	AE	Adverse Events		AEOUT	1	8	16	Outcome	AEOUT	0	0		0	0	0	16	91	V9	2017-10-13 16:55:46	2017-10-13 16:55:46	0	NONE	DATA	0	---	---	NO	NO					NO	NO	NO	YES	0			YES
SMR3571	AE	Adverse Events		AEREL	1	8	17	Relationship to Study Treatment	AEREL	0	0		0	0	0	24	91	V9	2017-10-13 16:55:46	2017-10-13 16:55:46	0	NONE	DATA	0	---	---	NO	NO					NO	NO	NO	YES	0			YES
SMR3571	AE	Adverse Events		AESER	1	8	18	SAE	YN	0	0		0	0	0	32	91	V9	2017-10-13 16:55:46	2017-10-13 16:55:46	0	NONE	DATA	0	---	---	NO	NO					NO	NO	NO	YES	0			YES
SMR3571	AE	Adverse Events		AESEV	1	8	19	Severity	AESEV	0	0		0	0	0	40	91	V9	2017-10-13 16:55:46	2017-10-13 16:55:46	0	NONE	DATA	0	---	---	NO	NO					NO	NO	NO	YES	0			YES
SMR3571	AE	Adverse Events		SUBJID	2	10	20	Subject ID		0	0		0	0	0	539	91	V9	2017-10-13 16:55:46	2017-10-13 16:55:46	0	NONE	DATA	0	---	---	NO	NO					NO	NO	NO	YES	0			YES
SMR3571	AE	Adverse Events		AESTDT	1	8	21	Start Date of Adverse Event	DATE	9	0		0	0	0	48	91	V9	2017-10-13 16:55:46	2017-10-13 16:55:46	0	NONE	DATA	0	---	---	NO	NO					NO	NO	NO	YES	0			YES
SMR3571	AE	Adverse Events		CDAEST	2	9	22	Start Date of Adverse Event (Char)		0	0		0	0	0	549	91	V9	2017-10-13 16:55:46	2017-10-13 16:55:46	0	NONE	DATA	0	---	---	NO	NO					NO	NO	NO	YES	0			YES
SMR3571	AE	Adverse Events		AEENDT	1	8	23	End Date of Adverse Event	DATE	9	0		0	0	0	56	91	V9	2017-10-13 16:55:46	2017-10-13 16:55:46	0	NONE	DATA	0	---	---	NO	NO					NO	NO	NO	YES	0			YES
SMR3571	AE	Adverse Events		CDAEEN	2	9	24	End Date of Adverse Event (Char)		0	0		0	0	0	558	91	V9	2017-10-13 16:55:46	2017-10-13 16:55:46	0	NONE	DATA	0	---	---	NO	NO					NO	NO	NO	YES	0			YES
SMR3571	AE	Adverse Events		SITE	2	21	25	Site		0	0		0	0	0	567	91	V9	2017-10-13 16:55:46	2017-10-13 16:55:46	0	NONE	DATA	0	---	---	NO	NO					NO	NO	NO	YES	0			YES
SMR3571	AE	Adverse Events		STATUS	2	17	26	Subject Status		0	0		0	0	0	588	91	V9	2017-10-13 16:55:46	2017-10-13 16:55:46	0	NONE	DATA	0	---	---	NO	NO					NO	NO	NO	YES	0			YES
SMR3571	AE	Adverse Events		AGE	1	3	27	Age, calculated		0	0		0	0	0	179	91	V9	2017-10-13 16:55:46	2017-10-13 16:55:46	0	NONE	DATA	0	---	---	NO	NO					NO	NO	NO	YES	0			YES
SMR3571	AE	Adverse Events		SEX	1	8	28	Sex	SEX	0	0		0	0	0	64	91	V9	2017-10-13 16:55:46	2017-10-13 16:55:46	0	NONE	DATA	0	---	---	NO	NO					NO	NO	NO	YES	0			YES
SMR3571	AE	Adverse Events		FIRSTDT	1	8	29	First Dose Date	DATE	9	0		0	0	0	72	91	V9	2017-10-13 16:55:46	2017-10-13 16:55:46	0	NONE	DATA	0	---	---	NO	NO					NO	NO	NO	YES	0			YES
SMR3571	AE	Adverse Events		RANDNO	1	8	30	Randomization Number		0	0		0	0	0	80	91	V9	2017-10-13 16:55:46	2017-10-13 16:55:46	0	NONE	DATA	0	---	---	NO	NO					NO	NO	NO	YES	0			YES
SMR3571	AE	Adverse Events		TREAT	1	8	31	Treatment Group	TREAT	0	0		0	0	0	88	91	V9	2017-10-13 16:55:46	2017-10-13 16:55:46	0	NONE	DATA	0	---	---	NO	NO					NO	NO	NO	YES	0			YES
SMR3571	AE	Adverse Events		OMEGA	1	8	32	Omega-3 Intake (randomization)	OMEGA	0	0		0	0	0	96	91	V9	2017-10-13 16:55:46	2017-10-13 16:55:46	0	NONE	DATA	0	---	---	NO	NO					NO	NO	NO	YES	0			YES
SMR3571	AE	Adverse Events		DIABETE	1	8	33	Diabetes (randomization)	YN	0	0		0	0	0	104	91	V9	2017-10-13 16:55:46	2017-10-13 16:55:46	0	NONE	DATA	0	---	---	NO	NO					NO	NO	NO	YES	0			YES
SMR3571	AE	Adverse Events		STATIN	1	8	34	Statins (randomization)	YN	0	0		0	0	0	112	91	V9	2017-10-13 16:55:46	2017-10-13 16:55:46	0	NONE	DATA	0	---	---	NO	NO					NO	NO	NO	YES	0			YES
SMR3571	AE	Adverse Events		OMEGA_C	1	8	35	Omega-3 Intake (reported)	OMEGA	0	0		0	0	0	120	91	V9	2017-10-13 16:55:46	2017-10-13 16:55:46	0	NONE	DATA	0	---	---	NO	NO					NO	NO	NO	YES	0			YES
SMR3571	AE	Adverse Events		SFFL	1	8	36	Screen Failure Flag	YN	0	0		0	0	0	128	91	V9	2017-10-13 16:55:46	2017-10-13 16:55:46	0	NONE	DATA	0	---	---	NO	NO					NO	NO	NO	YES	0			YES
SMR3571	AE	Adverse Events		SAFETY	1	8	37	Safety Population	YN	0	0		0	0	0	136	91	V9	2017-10-13 16:55:46	2017-10-13 16:55:46	0	NONE	DATA	0	---	---	NO	NO					NO	NO	NO	YES	0			YES
SMR3571	AE	Adverse Events		ITT	1	8	38	Intent to Treat Population	YN	0	0		0	0	0	144	91	V9	2017-10-13 16:55:46	2017-10-13 16:55:46	0	NONE	DATA	0	---	---	NO	NO					NO	NO	NO	YES	0			YES
SMR3571	AE	Adverse Events		MITT	1	8	39	Modified Intent to Treat Population	YN	0	0		0	0	0	152	91	V9	2017-10-13 16:55:46	2017-10-13 16:55:46	0	NONE	DATA	0	---	---	NO	NO					NO	NO	NO	YES	0			YES
SMR3571	AE	Adverse Events		PP	1	8	40	Per Protocol Population	YN	0	0		0	0	0	160	91	V9	2017-10-13 16:55:46	2017-10-13 16:55:46	0	NONE	DATA	0	---	---	NO	NO					NO	NO	NO	YES	0			YES
SMR3571	AE	Adverse Events		TEAE	1	8	41	Treatment Emergent AE	YN	0	0		0	0	0	168	91	V9	2017-10-13 16:55:46	2017-10-13 16:55:46	0	NONE	DATA	0	---	---	NO	NO					NO	NO	NO	YES	0			YES
SMR3571	CM	Concomitant Medications		CMSPID	1	3	1	CM Identifier		0	0		0	0	0	168	942	V9	2017-10-13 16:55:46	2017-10-13 16:55:46	0	NONE	DATA	0	---	---	NO	NO					NO	NO	NO	YES	0			YES
SMR3571	CM	Concomitant Medications		CMTRT	2	36	2	Medication (brand name preferable)		0	0		0	0	0	177	942	V9	2017-10-13 16:55:46	2017-10-13 16:55:46	0	NONE	DATA	0	---	---	NO	NO					NO	NO	NO	YES	0			YES
SMR3571	CM	Concomitant Medications		CMDOSE	2	16	3	Dose		0	0		0	0	0	213	942	V9	2017-10-13 16:55:46	2017-10-13 16:55:46	0	NONE	DATA	0	---	---	NO	NO					NO	NO	NO	YES	0			YES
SMR3571	CM	Concomitant Medications		CMFRQOTH	2	22	4	Specify other frequency		0	0		0	0	0	229	942	V9	2017-10-13 16:55:46	2017-10-13 16:55:46	0	NONE	DATA	0	---	---	NO	NO					NO	NO	NO	YES	0			YES
SMR3571	CM	Concomitant Medications		CMINDIC	2	59	5	Indication (taken for)		0	0		0	0	0	251	942	V9	2017-10-13 16:55:46	2017-10-13 16:55:46	0	NONE	DATA	0	---	---	NO	NO					NO	NO	NO	YES	0			YES
SMR3571	CM	Concomitant Medications		CMAENUM	1	3	6	Adverse Event Line Number:		0	0		0	0	0	171	942	V9	2017-10-13 16:55:46	2017-10-13 16:55:46	0	NONE	DATA	0	---	---	NO	NO					NO	NO	NO	YES	0			YES
SMR3571	CM	Concomitant Medications		CMDOSU	1	8	7	Units	DOSEU	0	0		0	0	0	0	942	V9	2017-10-13 16:55:46	2017-10-13 16:55:46	0	NONE	DATA	0	---	---	NO	NO					NO	NO	NO	YES	0			YES
SMR3571	CM	Concomitant Medications		CMDOSFRQ	1	8	8	Frequency	FREQUENCY	0	0		0	0	0	8	942	V9	2017-10-13 16:55:46	2017-10-13 16:55:46	0	NONE	DATA	0	---	---	NO	NO					NO	NO	NO	YES	0			YES
SMR3571	CM	Concomitant Medications		CMONGO	1	8	9	Ongoing	YN	0	0		0	0	0	16	942	V9	2017-10-13 16:55:46	2017-10-13 16:55:46	0	NONE	DATA	0	---	---	NO	NO					NO	NO	NO	YES	0			YES
SMR3571	CM	Concomitant Medications		CMROUTE	1	8	10	Route	ROUTE	0	0		0	0	0	24	942	V9	2017-10-13 16:55:46	2017-10-13 16:55:46	0	NONE	DATA	0	---	---	NO	NO					NO	NO	NO	YES	0			YES
SMR3571	CM	Concomitant Medications		CMINTRT	1	8	11	Used during the study?	YN	0	0		0	0	0	32	942	V9	2017-10-13 16:55:46	2017-10-13 16:55:46	0	NONE	DATA	0	---	---	NO	NO					NO	NO	NO	YES	0			YES
SMR3571	CM	Concomitant Medications		CMAEYN	1	8	12	Used to treat AE?	YN	0	0		0	0	0	40	942	V9	2017-10-13 16:55:46	2017-10-13 16:55:46	0	NONE	DATA	0	---	---	NO	NO					NO	NO	NO	YES	0			YES
SMR3571	CM	Concomitant Medications		SUBJID	2	10	13	Subject ID		0	0		0	0	0	310	942	V9	2017-10-13 16:55:46	2017-10-13 16:55:46	0	NONE	DATA	0	---	---	NO	NO					NO	NO	NO	YES	0			YES
SMR3571	CM	Concomitant Medications		CMSTDT	1	8	14	Start Date of Medication	DATE	9	0		0	0	0	48	942	V9	2017-10-13 16:55:46	2017-10-13 16:55:46	0	NONE	DATA	0	---	---	NO	NO					NO	NO	NO	YES	0			YES
SMR3571	CM	Concomitant Medications		CDCMST	2	9	15	Start Date of Medication (Char)		0	0		0	0	0	320	942	V9	2017-10-13 16:55:46	2017-10-13 16:55:46	0	NONE	DATA	0	---	---	NO	NO					NO	NO	NO	YES	0			YES
SMR3571	CM	Concomitant Medications		CMENDT	1	8	16	End Date of Medication	DATE	9	0		0	0	0	56	942	V9	2017-10-13 16:55:46	2017-10-13 16:55:46	0	NONE	DATA	0	---	---	NO	NO					NO	NO	NO	YES	0			YES
SMR3571	CM	Concomitant Medications		CDCMEN	2	9	17	End Date of Medication (Char)		0	0		0	0	0	329	942	V9	2017-10-13 16:55:46	2017-10-13 16:55:46	0	NONE	DATA	0	---	---	NO	NO					NO	NO	NO	YES	0			YES
SMR3571	CM	Concomitant Medications		SITE	2	21	18	Site		0	0		0	0	0	338	942	V9	2017-10-13 16:55:46	2017-10-13 16:55:46	0	NONE	DATA	0	---	---	NO	NO					NO	NO	NO	YES	0			YES
SMR3571	CM	Concomitant Medications		STATUS	2	17	19	Subject Status		0	0		0	0	0	359	942	V9	2017-10-13 16:55:46	2017-10-13 16:55:46	0	NONE	DATA	0	---	---	NO	NO					NO	NO	NO	YES	0			YES
SMR3571	CM	Concomitant Medications		AGE	1	3	20	Age, calculated		0	0		0	0	0	174	942	V9	2017-10-13 16:55:46	2017-10-13 16:55:46	0	NONE	DATA	0	---	---	NO	NO					NO	NO	NO	YES	0			YES
SMR3571	CM	Concomitant Medications		SEX	1	8	21	Sex	SEX	0	0		0	0	0	64	942	V9	2017-10-13 16:55:46	2017-10-13 16:55:46	0	NONE	DATA	0	---	---	NO	NO					NO	NO	NO	YES	0			YES
SMR3571	CM	Concomitant Medications		FIRSTDT	1	8	22	First Dose Date	DATE	9	0		0	0	0	72	942	V9	2017-10-13 16:55:46	2017-10-13 16:55:46	0	NONE	DATA	0	---	---	NO	NO					NO	NO	NO	YES	0			YES
SMR3571	CM	Concomitant Medications		RANDNO	1	8	23	Randomization Number		0	0		0	0	0	80	942	V9	2017-10-13 16:55:46	2017-10-13 16:55:46	0	NONE	DATA	0	---	---	NO	NO					NO	NO	NO	YES	0			YES
SMR3571	CM	Concomitant Medications		TREAT	1	8	24	Treatment Group	TREAT	0	0		0	0	0	88	942	V9	2017-10-13 16:55:46	2017-10-13 16:55:46	0	NONE	DATA	0	---	---	NO	NO					NO	NO	NO	YES	0			YES
SMR3571	CM	Concomitant Medications		OMEGA	1	8	25	Omega-3 Intake (randomization)	OMEGA	0	0		0	0	0	96	942	V9	2017-10-13 16:55:46	2017-10-13 16:55:46	0	NONE	DATA	0	---	---	NO	NO					NO	NO	NO	YES	0			YES
SMR3571	CM	Concomitant Medications		DIABETE	1	8	26	Diabetes (randomization)	YN	0	0		0	0	0	104	942	V9	2017-10-13 16:55:46	2017-10-13 16:55:46	0	NONE	DATA	0	---	---	NO	NO					NO	NO	NO	YES	0			YES
SMR3571	CM	Concomitant Medications		STATIN	1	8	27	Statins (randomization)	YN	0	0		0	0	0	112	942	V9	2017-10-13 16:55:46	2017-10-13 16:55:46	0	NONE	DATA	0	---	---	NO	NO					NO	NO	NO	YES	0			YES
SMR3571	CM	Concomitant Medications		OMEGA_C	1	8	28	Omega-3 Intake (reported)	OMEGA	0	0		0	0	0	120	942	V9	2017-10-13 16:55:46	2017-10-13 16:55:46	0	NONE	DATA	0	---	---	NO	NO					NO	NO	NO	YES	0			YES
SMR3571	CM	Concomitant Medications		SFFL	1	8	29	Screen Failure Flag	YN	0	0		0	0	0	128	942	V9	2017-10-13 16:55:46	2017-10-13 16:55:46	0	NONE	DATA	0	---	---	NO	NO					NO	NO	NO	YES	0			YES
SMR3571	CM	Concomitant Medications		SAFETY	1	8	30	Safety Population	YN	0	0		0	0	0	136	942	V9	2017-10-13 16:55:46	2017-10-13 16:55:46	0	NONE	DATA	0	---	---	NO	NO					NO	NO	NO	YES	0			YES
SMR3571	CM	Concomitant Medications		ITT	1	8	31	Intent to Treat Population	YN	0	0		0	0	0	144	942	V9	2017-10-13 16:55:46	2017-10-13 16:55:46	0	NONE	DATA	0	---	---	NO	NO					NO	NO	NO	YES	0			YES
SMR3571	CM	Concomitant Medications		MITT	1	8	32	Modified Intent to Treat Population	YN	0	0		0	0	0	152	942	V9	2017-10-13 16:55:46	2017-10-13 16:55:46	0	NONE	DATA	0	---	---	NO	NO					NO	NO	NO	YES	0			YES
SMR3571	CM	Concomitant Medications		PP	1	8	33	Per Protocol Population	YN	0	0		0	0	0	160	942	V9	2017-10-13 16:55:46	2017-10-13 16:55:46	0	NONE	DATA	0	---	---	NO	NO					NO	NO	NO	YES	0			YES
SMR3571	DA	Drug Accountability		DASPID	1	3	1	Row		0	0		0	0	0	156	646	V9	2017-10-13 16:55:47	2017-10-13 16:55:47	0	NONE	DATA	0	---	---	NO	NO					NO	NO	NO	YES	0			YES
SMR3571	DA	Drug Accountability		BOTTLE	1	3	2	Bottle number		0	0		0	0	0	159	646	V9	2017-10-13 16:55:47	2017-10-13 16:55:47	0	NONE	DATA	0	---	---	NO	NO					NO	NO	NO	YES	0			YES
SMR3571	DA	Drug Accountability		DANUMDIS	1	4	3	Number of capsules dispensed		0	0		0	0	0	136	646	V9	2017-10-13 16:55:47	2017-10-13 16:55:47	0	NONE	DATA	0	---	---	NO	NO					NO	NO	NO	YES	0			YES
SMR3571	DA	Drug Accountability		DADISPBY	2	7	4	Dispensed by (staff initials)		0	0		0	0	0	165	646	V9	2017-10-13 16:55:47	2017-10-13 16:55:47	0	NONE	DATA	0	---	---	NO	NO					NO	NO	NO	YES	0			YES
SMR3571	DA	Drug Accountability		DANUMRET	1	4	5	Number of capsules returned		0	0		0	0	0	140	646	V9	2017-10-13 16:55:47	2017-10-13 16:55:47	0	NONE	DATA	0	---	---	NO	NO					NO	NO	NO	YES	0			YES
SMR3571	DA	Drug Accountability		DARETTO	2	7	6	Returned to (staff initials)		0	0		0	0	0	172	646	V9	2017-10-13 16:55:47	2017-10-13 16:55:47	0	NONE	DATA	0	---	---	NO	NO					NO	NO	NO	YES	0			YES
SMR3571	DA	Drug Accountability		DANUMTKN	1	4	7	Number of capsules taken		0	0		0	0	0	144	646	V9	2017-10-13 16:55:47	2017-10-13 16:55:47	0	NONE	DATA	0	---	---	NO	NO					NO	NO	NO	YES	0			YES
SMR3571	DA	Drug Accountability		DANUMEXP	1	4	8	Number of capsules expected to have been		0	0		0	0	0	148	646	V9	2017-10-13 16:55:47	2017-10-13 16:55:47	0	NONE	DATA	0	---	---	NO	NO					NO	NO	NO	YES	0			YES
SMR3571	DA	Drug Accountability		COMPSITE	1	8	9	Compliance calculated by site		0	0		0	0	0	0	646	V9	2017-10-13 16:55:47	2017-10-13 16:55:47	0	NONE	DATA	0	---	---	NO	NO					NO	NO	NO	YES	0			YES
SMR3571	DA	Drug Accountability		COMPLIAN	1	8	10	Compliance		0	0		0	0	0	8	646	V9	2017-10-13 16:55:47	2017-10-13 16:55:47	0	NONE	DATA	0	---	---	NO	NO					NO	NO	NO	YES	0			YES
SMR3571	DA	Drug Accountability		SUBJID	2	10	11	Subject ID		0	0		0	0	0	179	646	V9	2017-10-13 16:55:47	2017-10-13 16:55:47	0	NONE	DATA	0	---	---	NO	NO					NO	NO	NO	YES	0			YES
SMR3571	DA	Drug Accountability		DADISDT	1	8	12	Dispensing Date	DATE	9	0		0	0	0	16	646	V9	2017-10-13 16:55:47	2017-10-13 16:55:47	0	NONE	DATA	0	---	---	NO	NO					NO	NO	NO	YES	0			YES
SMR3571	DA	Drug Accountability		CDDADIS	2	9	13	Dispensing Date		0	0		0	0	0	189	646	V9	2017-10-13 16:55:47	2017-10-13 16:55:47	0	NONE	DATA	0	---	---	NO	NO					NO	NO	NO	YES	0			YES
SMR3571	DA	Drug Accountability		DARETDT	1	8	14	Return Date	DATE	9	0		0	0	0	24	646	V9	2017-10-13 16:55:47	2017-10-13 16:55:47	0	NONE	DATA	0	---	---	NO	NO					NO	NO	NO	YES	0			YES
SMR3571	DA	Drug Accountability		CDDARET	2	9	15	Return Date		0	0		0	0	0	198	646	V9	2017-10-13 16:55:47	2017-10-13 16:55:47	0	NONE	DATA	0	---	---	NO	NO					NO	NO	NO	YES	0			YES
SMR3571	DA	Drug Accountability		RANDNUM	1	4	16	Randomization Number		0	0		0	0	0	152	646	V9	2017-10-13 16:55:47	2017-10-13 16:55:47	0	NONE	DATA	0	---	---	NO	NO					NO	NO	NO	YES	0			YES
SMR3571	DA	Drug Accountability		SITE	2	21	17	Site		0	0		0	0	0	207	646	V9	2017-10-13 16:55:47	2017-10-13 16:55:47	0	NONE	DATA	0	---	---	NO	NO					NO	NO	NO	YES	0			YES
SMR3571	DA	Drug Accountability		STATUS	2	17	18	Subject Status		0	0		0	0	0	228	646	V9	2017-10-13 16:55:47	2017-10-13 16:55:47	0	NONE	DATA	0	---	---	NO	NO					NO	NO	NO	YES	0			YES
SMR3571	DA	Drug Accountability		AGE	1	3	19	Age, calculated		0	0		0	0	0	162	646	V9	2017-10-13 16:55:47	2017-10-13 16:55:47	0	NONE	DATA	0	---	---	NO	NO					NO	NO	NO	YES	0			YES
SMR3571	DA	Drug Accountability		SEX	1	8	20	Sex	SEX	0	0		0	0	0	32	646	V9	2017-10-13 16:55:47	2017-10-13 16:55:47	0	NONE	DATA	0	---	---	NO	NO					NO	NO	NO	YES	0			YES
SMR3571	DA	Drug Accountability		FIRSTDT	1	8	21	First Dose Date	DATE	9	0		0	0	0	40	646	V9	2017-10-13 16:55:47	2017-10-13 16:55:47	0	NONE	DATA	0	---	---	NO	NO					NO	NO	NO	YES	0			YES
SMR3571	DA	Drug Accountability		RANDNO	1	8	22	Randomization Number		0	0		0	0	0	48	646	V9	2017-10-13 16:55:47	2017-10-13 16:55:47	0	NONE	DATA	0	---	---	NO	NO					NO	NO	NO	YES	0			YES
SMR3571	DA	Drug Accountability		TREAT	1	8	23	Treatment Group	TREAT	0	0		0	0	0	56	646	V9	2017-10-13 16:55:47	2017-10-13 16:55:47	0	NONE	DATA	0	---	---	NO	NO					NO	NO	NO	YES	0			YES
SMR3571	DA	Drug Accountability		OMEGA	1	8	24	Omega-3 Intake (randomization)	OMEGA	0	0		0	0	0	64	646	V9	2017-10-13 16:55:47	2017-10-13 16:55:47	0	NONE	DATA	0	---	---	NO	NO					NO	NO	NO	YES	0			YES
SMR3571	DA	Drug Accountability		DIABETE	1	8	25	Diabetes (randomization)	YN	0	0		0	0	0	72	646	V9	2017-10-13 16:55:47	2017-10-13 16:55:47	0	NONE	DATA	0	---	---	NO	NO					NO	NO	NO	YES	0			YES
SMR3571	DA	Drug Accountability		STATIN	1	8	26	Statins (randomization)	YN	0	0		0	0	0	80	646	V9	2017-10-13 16:55:47	2017-10-13 16:55:47	0	NONE	DATA	0	---	---	NO	NO					NO	NO	NO	YES	0			YES
SMR3571	DA	Drug Accountability		OMEGA_C	1	8	27	Omega-3 Intake (reported)	OMEGA	0	0		0	0	0	88	646	V9	2017-10-13 16:55:47	2017-10-13 16:55:47	0	NONE	DATA	0	---	---	NO	NO					NO	NO	NO	YES	0			YES
SMR3571	DA	Drug Accountability		SFFL	1	8	28	Screen Failure Flag	YN	0	0		0	0	0	96	646	V9	2017-10-13 16:55:47	2017-10-13 16:55:47	0	NONE	DATA	0	---	---	NO	NO					NO	NO	NO	YES	0			YES
SMR3571	DA	Drug Accountability		SAFETY	1	8	29	Safety Population	YN	0	0		0	0	0	104	646	V9	2017-10-13 16:55:47	2017-10-13 16:55:47	0	NONE	DATA	0	---	---	NO	NO					NO	NO	NO	YES	0			YES
SMR3571	DA	Drug Accountability		ITT	1	8	30	Intent to Treat Population	YN	0	0		0	0	0	112	646	V9	2017-10-13 16:55:47	2017-10-13 16:55:47	0	NONE	DATA	0	---	---	NO	NO					NO	NO	NO	YES	0			YES
SMR3571	DA	Drug Accountability		MITT	1	8	31	Modified Intent to Treat Population	YN	0	0		0	0	0	120	646	V9	2017-10-13 16:55:47	2017-10-13 16:55:47	0	NONE	DATA	0	---	---	NO	NO					NO	NO	NO	YES	0			YES
SMR3571	DA	Drug Accountability		PP	1	8	32	Per Protocol Population	YN	0	0		0	0	0	128	646	V9	2017-10-13 16:55:47	2017-10-13 16:55:47	0	NONE	DATA	0	---	---	NO	NO					NO	NO	NO	YES	0			YES
SMR3571	DM	Demographics		ICVER	2	9	1	Version of Informed Consent signed at th		0	0		0	0	0	198	291	V9	2017-10-13 16:55:47	2017-10-13 16:55:47	0	NONE	DATA	0	---	---	NO	NO					NO	NO	NO	YES	0			YES
SMR3571	DM	Demographics		ICCHVER	1	8	2	If yes, Informed Consent Form version	ICCHVER	0	0		0	0	0	0	291	V9	2017-10-13 16:55:47	2017-10-13 16:55:47	0	NONE	DATA	0	---	---	NO	NO					NO	NO	NO	YES	0			YES
SMR3571	DM	Demographics		ICCHYN	1	8	3	Was another version of the Informed Cons	YN	0	0		0	0	0	8	291	V9	2017-10-13 16:55:47	2017-10-13 16:55:47	0	NONE	DATA	0	---	---	NO	NO					NO	NO	NO	YES	0			YES
SMR3571	DM	Demographics		ICREAD	1	8	4	Was the subject given ample time to read	YN	0	0		0	0	0	16	291	V9	2017-10-13 16:55:47	2017-10-13 16:55:47	0	NONE	DATA	0	---	---	NO	NO					NO	NO	NO	YES	0			YES
SMR3571	DM	Demographics		SUBJID	2	10	5	Subject ID		0	0		0	0	0	207	291	V9	2017-10-13 16:55:47	2017-10-13 16:55:47	0	NONE	DATA	0	---	---	NO	NO					NO	NO	NO	YES	0			YES
SMR3571	DM	Demographics		ICDT	1	8	6	Date Informed Consent Signed	DATE	9	0		0	0	0	24	291	V9	2017-10-13 16:55:47	2017-10-13 16:55:47	0	NONE	DATA	0	---	---	NO	NO					NO	NO	NO	YES	0			YES
SMR3571	DM	Demographics		ICTM	1	8	7	Time Informed Consent Signed (Char)	TIME	5	0		0	0	0	32	291	V9	2017-10-13 16:55:47	2017-10-13 16:55:47	0	NONE	DATA	0	---	---	NO	NO					NO	NO	NO	YES	0			YES
SMR3571	DM	Demographics		CDIC	2	9	8	Date Informed Consent Signed (Char)		0	0		0	0	0	217	291	V9	2017-10-13 16:55:47	2017-10-13 16:55:47	0	NONE	DATA	0	---	---	NO	NO					NO	NO	NO	YES	0			YES
SMR3571	DM	Demographics		CTIC	2	5	9	Time Informed Consent Signed		0	0		0	0	0	226	291	V9	2017-10-13 16:55:47	2017-10-13 16:55:47	0	NONE	DATA	0	---	---	NO	NO					NO	NO	NO	YES	0			YES
SMR3571	DM	Demographics		BRTHDAT	1	8	10	DATE OF BRITH	DATE	9	0		0	0	0	40	291	V9	2017-10-13 16:55:47	2017-10-13 16:55:47	0	NONE	DATA	0	---	---	NO	NO					NO	NO	NO	YES	0			YES
SMR3571	DM	Demographics		RACEOTH	2	14	11	If Other, specify		0	0		0	0	0	231	291	V9	2017-10-13 16:55:47	2017-10-13 16:55:47	0	NONE	DATA	0	---	---	NO	NO					NO	NO	NO	YES	0			YES
SMR3571	DM	Demographics		ALCNUM	1	3	12	Alcohol use/Number of drinks		0	0		0	0	0	192	291	V9	2017-10-13 16:55:47	2017-10-13 16:55:47	0	NONE	DATA	0	---	---	NO	NO					NO	NO	NO	YES	0			YES
SMR3571	DM	Demographics		ALCFREQ	1	8	13	Alcohol use (frequency)	DEM_DRINKSFREQ	0	0		0	0	0	48	291	V9	2017-10-13 16:55:47	2017-10-13 16:55:47	0	NONE	DATA	0	---	---	NO	NO					NO	NO	NO	YES	0			YES
SMR3571	DM	Demographics		ETHNIC	1	8	14	Ethnicity	ETHNIC	0	0		0	0	0	56	291	V9	2017-10-13 16:55:47	2017-10-13 16:55:47	0	NONE	DATA	0	---	---	NO	NO					NO	NO	NO	YES	0			YES
SMR3571	DM	Demographics		RACE	1	8	15	Race	RACE	0	0		0	0	0	64	291	V9	2017-10-13 16:55:47	2017-10-13 16:55:47	0	NONE	DATA	0	---	---	NO	NO					NO	NO	NO	YES	0			YES
SMR3571	DM	Demographics		SMKYN	1	8	16	Was the subject ever a smoker?	YN	0	0		0	0	0	72	291	V9	2017-10-13 16:55:47	2017-10-13 16:55:47	0	NONE	DATA	0	---	---	NO	NO					NO	NO	NO	YES	0			YES
SMR3571	DM	Demographics		SMKQTDT	1	8	17	Date Quit Smoking	DATE	9	0		0	0	0	80	291	V9	2017-10-13 16:55:47	2017-10-13 16:55:47	0	NONE	DATA	0	---	---	NO	NO					NO	NO	NO	YES	0			YES
SMR3571	DM	Demographics		CDSMKQT	2	9	18	Date Quit Smoking (Char)		0	0		0	0	0	245	291	V9	2017-10-13 16:55:47	2017-10-13 16:55:47	0	NONE	DATA	0	---	---	NO	NO					NO	NO	NO	YES	0			YES
SMR3571	DM	Demographics		SITE	2	21	19	Site		0	0		0	0	0	254	291	V9	2017-10-13 16:55:47	2017-10-13 16:55:47	0	NONE	DATA	0	---	---	NO	NO					NO	NO	NO	YES	0			YES
SMR3571	DM	Demographics		STATUS	2	17	20	Subject Status		0	0		0	0	0	275	291	V9	2017-10-13 16:55:47	2017-10-13 16:55:47	0	NONE	DATA	0	---	---	NO	NO					NO	NO	NO	YES	0			YES
SMR3571	DM	Demographics		AGE	1	3	21	Age, calculated		0	0		0	0	0	195	291	V9	2017-10-13 16:55:47	2017-10-13 16:55:47	0	NONE	DATA	0	---	---	NO	NO					NO	NO	NO	YES	0			YES
SMR3571	DM	Demographics		SEX	1	8	22	Sex	SEX	0	0		0	0	0	88	291	V9	2017-10-13 16:55:47	2017-10-13 16:55:47	0	NONE	DATA	0	---	---	NO	NO					NO	NO	NO	YES	0			YES
SMR3571	DM	Demographics		FIRSTDT	1	8	23	First Dose Date	DATE	9	0		0	0	0	96	291	V9	2017-10-13 16:55:47	2017-10-13 16:55:47	0	NONE	DATA	0	---	---	NO	NO					NO	NO	NO	YES	0			YES
SMR3571	DM	Demographics		RANDNO	1	8	24	Randomization Number		0	0		0	0	0	104	291	V9	2017-10-13 16:55:47	2017-10-13 16:55:47	0	NONE	DATA	0	---	---	NO	NO					NO	NO	NO	YES	0			YES
SMR3571	DM	Demographics		TREAT	1	8	25	Treatment Group	TREAT	0	0		0	0	0	112	291	V9	2017-10-13 16:55:47	2017-10-13 16:55:47	0	NONE	DATA	0	---	---	NO	NO					NO	NO	NO	YES	0			YES
SMR3571	DM	Demographics		OMEGA	1	8	26	Omega-3 Intake (randomization)	OMEGA	0	0		0	0	0	120	291	V9	2017-10-13 16:55:47	2017-10-13 16:55:47	0	NONE	DATA	0	---	---	NO	NO					NO	NO	NO	YES	0			YES
SMR3571	DM	Demographics		DIABETE	1	8	27	Diabetes (randomization)	YN	0	0		0	0	0	128	291	V9	2017-10-13 16:55:47	2017-10-13 16:55:47	0	NONE	DATA	0	---	---	NO	NO					NO	NO	NO	YES	0			YES
SMR3571	DM	Demographics		STATIN	1	8	28	Statins (randomization)	YN	0	0		0	0	0	136	291	V9	2017-10-13 16:55:47	2017-10-13 16:55:47	0	NONE	DATA	0	---	---	NO	NO					NO	NO	NO	YES	0			YES
SMR3571	DM	Demographics		OMEGA_C	1	8	29	Omega-3 Intake (reported)	OMEGA	0	0		0	0	0	144	291	V9	2017-10-13 16:55:47	2017-10-13 16:55:47	0	NONE	DATA	0	---	---	NO	NO					NO	NO	NO	YES	0			YES
SMR3571	DM	Demographics		SFFL	1	8	30	Screen Failure Flag	YN	0	0		0	0	0	152	291	V9	2017-10-13 16:55:47	2017-10-13 16:55:47	0	NONE	DATA	0	---	---	NO	NO					NO	NO	NO	YES	0			YES
SMR3571	DM	Demographics		SAFETY	1	8	31	Safety Population	YN	0	0		0	0	0	160	291	V9	2017-10-13 16:55:47	2017-10-13 16:55:47	0	NONE	DATA	0	---	---	NO	NO					NO	NO	NO	YES	0			YES
SMR3571	DM	Demographics		ITT	1	8	32	Intent to Treat Population	YN	0	0		0	0	0	168	291	V9	2017-10-13 16:55:47	2017-10-13 16:55:47	0	NONE	DATA	0	---	---	NO	NO					NO	NO	NO	YES	0			YES
SMR3571	DM	Demographics		MITT	1	8	33	Modified Intent to Treat Population	YN	0	0		0	0	0	176	291	V9	2017-10-13 16:55:47	2017-10-13 16:55:47	0	NONE	DATA	0	---	---	NO	NO					NO	NO	NO	YES	0			YES
SMR3571	DM	Demographics		PP	1	8	34	Per Protocol Population	YN	0	0		0	0	0	184	291	V9	2017-10-13 16:55:47	2017-10-13 16:55:47	0	NONE	DATA	0	---	---	NO	NO					NO	NO	NO	YES	0			YES
SMR3571	DS	End of Study		DSAENUM	1	3	1	Adverse event line number		0	0		0	0	0	160	291	V9	2017-10-13 16:55:47	2017-10-13 16:55:47	0	NONE	DATA	0	---	---	NO	NO					NO	NO	NO	YES	0			YES
SMR3571	DS	End of Study		DSREAOTH	2	198	2	Specify other reason for withdrawal:		0	0		0	0	0	166	291	V9	2017-10-13 16:55:47	2017-10-13 16:55:47	0	NONE	DATA	0	---	---	NO	NO					NO	NO	NO	YES	0			YES
SMR3571	DS	End of Study		DSCOMM	2	176	3	Comments		0	0		0	0	0	364	291	V9	2017-10-13 16:55:47	2017-10-13 16:55:47	0	NONE	DATA	0	---	---	NO	NO					NO	NO	NO	YES	0			YES
SMR3571	DS	End of Study		DSREA	1	8	4	Reason for early withdrawal	ETREASON	0	0		0	0	0	0	291	V9	2017-10-13 16:55:47	2017-10-13 16:55:47	0	NONE	DATA	0	---	---	NO	NO					NO	NO	NO	YES	0			YES
SMR3571	DS	End of Study		SUBJID	2	10	5	Subject ID		0	0		0	0	0	540	291	V9	2017-10-13 16:55:47	2017-10-13 16:55:47	0	NONE	DATA	0	---	---	NO	NO					NO	NO	NO	YES	0			YES
SMR3571	DS	End of Study		DTHDT	1	8	6	Death Date	DATE	9	0		0	0	0	8	291	V9	2017-10-13 16:55:47	2017-10-13 16:55:47	0	NONE	DATA	0	---	---	NO	NO					NO	NO	NO	YES	0			YES
SMR3571	DS	End of Study		CDDTH	2	9	7	Death Date (Char)		0	0		0	0	0	550	291	V9	2017-10-13 16:55:47	2017-10-13 16:55:47	0	NONE	DATA	0	---	---	NO	NO					NO	NO	NO	YES	0			YES
SMR3571	DS	End of Study		MISSDOSE	1	8	8	Number of Missing Dose		0	0		0	0	0	16	291	V9	2017-10-13 16:55:47	2017-10-13 16:55:47	0	NONE	DATA	0	---	---	NO	NO					NO	NO	NO	YES	0			YES
SMR3571	DS	End of Study		DSCOMP	1	8	9	Complete Study	YN	0	0		0	0	0	24	291	V9	2017-10-13 16:55:47	2017-10-13 16:55:47	0	NONE	DATA	0	---	---	NO	NO					NO	NO	NO	YES	0			YES
SMR3571	DS	End of Study		T_TRIAL	1	8	10	Time in Trial (days)		0	0		0	0	0	32	291	V9	2017-10-13 16:55:47	2017-10-13 16:55:47	0	NONE	DATA	0	---	---	NO	NO					NO	NO	NO	YES	0			YES
SMR3571	DS	End of Study		COMPLIAN	1	8	11	Compliance (%)		0	0		0	0	0	40	291	V9	2017-10-13 16:55:47	2017-10-13 16:55:47	0	NONE	DATA	0	---	---	NO	NO					NO	NO	NO	YES	0			YES
SMR3571	DS	End of Study		SITE	2	21	12	Site		0	0		0	0	0	559	291	V9	2017-10-13 16:55:47	2017-10-13 16:55:47	0	NONE	DATA	0	---	---	NO	NO					NO	NO	NO	YES	0			YES
SMR3571	DS	End of Study		STATUS	2	17	13	Subject Status		0	0		0	0	0	580	291	V9	2017-10-13 16:55:47	2017-10-13 16:55:47	0	NONE	DATA	0	---	---	NO	NO					NO	NO	NO	YES	0			YES
SMR3571	DS	End of Study		AGE	1	3	14	Age, calculated		0	0		0	0	0	163	291	V9	2017-10-13 16:55:47	2017-10-13 16:55:47	0	NONE	DATA	0	---	---	NO	NO					NO	NO	NO	YES	0			YES
SMR3571	DS	End of Study		SEX	1	8	15	Sex	SEX	0	0		0	0	0	48	291	V9	2017-10-13 16:55:47	2017-10-13 16:55:47	0	NONE	DATA	0	---	---	NO	NO					NO	NO	NO	YES	0			YES
SMR3571	DS	End of Study		FIRSTDT	1	8	16	First Dose Date	DATE	9	0		0	0	0	56	291	V9	2017-10-13 16:55:47	2017-10-13 16:55:47	0	NONE	DATA	0	---	---	NO	NO					NO	NO	NO	YES	0			YES
SMR3571	DS	End of Study		RANDNO	1	8	17	Randomization Number		0	0		0	0	0	64	291	V9	2017-10-13 16:55:47	2017-10-13 16:55:47	0	NONE	DATA	0	---	---	NO	NO					NO	NO	NO	YES	0			YES
SMR3571	DS	End of Study		TREAT	1	8	18	Treatment Group	TREAT	0	0		0	0	0	72	291	V9	2017-10-13 16:55:47	2017-10-13 16:55:47	0	NONE	DATA	0	---	---	NO	NO					NO	NO	NO	YES	0			YES
SMR3571	DS	End of Study		OMEGA	1	8	19	Omega-3 Intake (randomization)	OMEGA	0	0		0	0	0	80	291	V9	2017-10-13 16:55:47	2017-10-13 16:55:47	0	NONE	DATA	0	---	---	NO	NO					NO	NO	NO	YES	0			YES
SMR3571	DS	End of Study		DIABETE	1	8	20	Diabetes (randomization)	YN	0	0		0	0	0	88	291	V9	2017-10-13 16:55:47	2017-10-13 16:55:47	0	NONE	DATA	0	---	---	NO	NO					NO	NO	NO	YES	0			YES
SMR3571	DS	End of Study		STATIN	1	8	21	Statins (randomization)	YN	0	0		0	0	0	96	291	V9	2017-10-13 16:55:47	2017-10-13 16:55:47	0	NONE	DATA	0	---	---	NO	NO					NO	NO	NO	YES	0			YES
SMR3571	DS	End of Study		OMEGA_C	1	8	22	Omega-3 Intake (reported)	OMEGA	0	0		0	0	0	104	291	V9	2017-10-13 16:55:47	2017-10-13 16:55:47	0	NONE	DATA	0	---	---	NO	NO					NO	NO	NO	YES	0			YES
SMR3571	DS	End of Study		SFFL	1	8	23	Screen Failure Flag	YN	0	0		0	0	0	112	291	V9	2017-10-13 16:55:47	2017-10-13 16:55:47	0	NONE	DATA	0	---	---	NO	NO					NO	NO	NO	YES	0			YES
SMR3571	DS	End of Study		SAFETY	1	8	24	Safety Population	YN	0	0		0	0	0	120	291	V9	2017-10-13 16:55:47	2017-10-13 16:55:47	0	NONE	DATA	0	---	---	NO	NO					NO	NO	NO	YES	0			YES
SMR3571	DS	End of Study		ITT	1	8	25	Intent to Treat Population	YN	0	0		0	0	0	128	291	V9	2017-10-13 16:55:47	2017-10-13 16:55:47	0	NONE	DATA	0	---	---	NO	NO					NO	NO	NO	YES	0			YES
SMR3571	DS	End of Study		MITT	1	8	26	Modified Intent to Treat Population	YN	0	0		0	0	0	136	291	V9	2017-10-13 16:55:47	2017-10-13 16:55:47	0	NONE	DATA	0	---	---	NO	NO					NO	NO	NO	YES	0			YES
SMR3571	DS	End of Study		PP	1	8	27	Per Protocol Population	YN	0	0		0	0	0	144	291	V9	2017-10-13 16:55:47	2017-10-13 16:55:47	0	NONE	DATA	0	---	---	NO	NO					NO	NO	NO	YES	0			YES
SMR3571	DS	End of Study		PPREASON	2	53	28	Reason for Exclusion from PP	$	53	0	$	53	0	0	597	291	V9	2017-10-13 16:55:47	2017-10-13 16:55:47	0	NONE	DATA	0	---	---	NO	NO					NO	NO	NO	YES	0			YES
SMR3571	DS	End of Study		T_TREAT	1	8	29	Time on Treatment (days)		0	0		0	0	0	152	291	V9	2017-10-13 16:55:47	2017-10-13 16:55:47	0	NONE	DATA	0	---	---	NO	NO					NO	NO	NO	YES	0			YES
SMR3571	EC	Patient Diary		Q6_COM	2	200	1	If Yes, describe		0	0		0	0	0	195	26729	V9	2017-10-13 16:55:47	2017-10-13 16:55:47	0	NONE	DATA	0	---	---	NO	NO					NO	NO	NO	YES	0			YES
SMR3571	EC	Patient Diary		Q7_COM	2	200	2	If Yes, list supplement type, brand, dos		0	0		0	0	0	395	26729	V9	2017-10-13 16:55:47	2017-10-13 16:55:47	0	NONE	DATA	0	---	---	NO	NO					NO	NO	NO	YES	0			YES
SMR3571	EC	Patient Diary		TPEX	2	200	3	Type of exercise		0	0		0	0	0	595	26729	V9	2017-10-13 16:55:47	2017-10-13 16:55:47	0	NONE	DATA	0	---	---	NO	NO					NO	NO	NO	YES	0			YES
SMR3571	EC	Patient Diary		COMMENT	2	200	4	Comment		0	0		0	0	0	795	26729	V9	2017-10-13 16:55:47	2017-10-13 16:55:47	0	NONE	DATA	0	---	---	NO	NO					NO	NO	NO	YES	0			YES
SMR3571	EC	Patient Diary		Q3	2	50	5	3. What type of fish or shellfish did yo		0	0		0	0	0	995	26729	V9	2017-10-13 16:55:47	2017-10-13 16:55:47	0	NONE	DATA	0	---	---	NO	NO					NO	NO	NO	YES	0			YES
SMR3571	EC	Patient Diary		Q4	2	50	6	4. Thinking of all your meals this week,		0	0		0	0	0	1045	26729	V9	2017-10-13 16:55:47	2017-10-13 16:55:47	0	NONE	DATA	0	---	---	NO	NO					NO	NO	NO	YES	0			YES
SMR3571	EC	Patient Diary		Q5	2	50	7	5. Thinking of all of your snacks this w		0	0		0	0	0	1095	26729	V9	2017-10-13 16:55:47	2017-10-13 16:55:47	0	NONE	DATA	0	---	---	NO	NO					NO	NO	NO	YES	0			YES
SMR3571	EC	Patient Diary		SUBJID	2	10	8	Subject ID		0	0		0	0	0	1145	26729	V9	2017-10-13 16:55:47	2017-10-13 16:55:47	0	NONE	DATA	0	---	---	NO	NO					NO	NO	NO	YES	0			YES
SMR3571	EC	Patient Diary		VISIT	2	7	9	Visit		0	0		0	0	0	1155	26729	V9	2017-10-13 16:55:47	2017-10-13 16:55:47	0	NONE	DATA	0	---	---	NO	NO					NO	NO	NO	YES	0			YES
SMR3571	EC	Patient Diary		DOSETKN	1	8	10	Capsules (3) taken?	YN	0	0		0	0	0	0	26729	V9	2017-10-13 16:55:47	2017-10-13 16:55:47	0	NONE	DATA	0	---	---	NO	NO					NO	NO	NO	YES	0			YES
SMR3571	EC	Patient Diary		WEEK	1	8	11	Week		0	0		0	0	0	8	26729	V9	2017-10-13 16:55:47	2017-10-13 16:55:47	0	NONE	DATA	0	---	---	NO	NO					NO	NO	NO	YES	0			YES
SMR3571	EC	Patient Diary		DAY	1	8	12	Day		0	0		0	0	0	16	26729	V9	2017-10-13 16:55:47	2017-10-13 16:55:47	0	NONE	DATA	0	---	---	NO	NO					NO	NO	NO	YES	0			YES
SMR3571	EC	Patient Diary		DOSEDAT	1	8	13	Dose Date	DATE	9	0		0	0	0	24	26729	V9	2017-10-13 16:55:47	2017-10-13 16:55:47	0	NONE	DATA	0	---	---	NO	NO					NO	NO	NO	YES	0			YES
SMR3571	EC	Patient Diary		Q1	1	8	14	1. How many times have you eaten fish or	DW01_Q1_	0	0		0	0	0	32	26729	V9	2017-10-13 16:55:47	2017-10-13 16:55:47	0	NONE	DATA	0	---	---	NO	NO					NO	NO	NO	YES	0			YES
SMR3571	EC	Patient Diary		Q2	1	8	15	2. Each time you ate fish, how much did	DW01_Q2_	0	0		0	0	0	40	26729	V9	2017-10-13 16:55:47	2017-10-13 16:55:47	0	NONE	DATA	0	---	---	NO	NO					NO	NO	NO	YES	0			YES
SMR3571	EC	Patient Diary		Q6	1	8	16	6. Have you made any other dietary chang	YN	0	0		0	0	0	48	26729	V9	2017-10-13 16:55:47	2017-10-13 16:55:47	0	NONE	DATA	0	---	---	NO	NO					NO	NO	NO	YES	0			YES
SMR3571	EC	Patient Diary		Q7	1	8	17	7. Have you taken any supplements (other	YN	0	0		0	0	0	56	26729	V9	2017-10-13 16:55:47	2017-10-13 16:55:47	0	NONE	DATA	0	---	---	NO	NO					NO	NO	NO	YES	0			YES
SMR3571	EC	Patient Diary		Q8	1	8	18	8. In the past week, on an average day,	DW01_Q8_	0	0		0	0	0	64	26729	V9	2017-10-13 16:55:47	2017-10-13 16:55:47	0	NONE	DATA	0	---	---	NO	NO					NO	NO	NO	YES	0			YES
SMR3571	EC	Patient Diary		Q8B	1	8	19	8b. Intensity Level:	DW01_Q8B	0	0		0	0	0	72	26729	V9	2017-10-13 16:55:47	2017-10-13 16:55:47	0	NONE	DATA	0	---	---	NO	NO					NO	NO	NO	YES	0			YES
SMR3571	EC	Patient Diary		VISITNUM	1	8	20	Visit	VISIT	0	0		0	0	0	80	26729	V9	2017-10-13 16:55:47	2017-10-13 16:55:47	0	NONE	DATA	0	---	---	NO	NO					NO	NO	NO	YES	0			YES
SMR3571	EC	Patient Diary		SITE	2	21	21	Site		0	0		0	0	0	1162	26729	V9	2017-10-13 16:55:47	2017-10-13 16:55:47	0	NONE	DATA	0	---	---	NO	NO					NO	NO	NO	YES	0			YES
SMR3571	EC	Patient Diary		STATUS	2	17	22	Subject Status		0	0		0	0	0	1183	26729	V9	2017-10-13 16:55:47	2017-10-13 16:55:47	0	NONE	DATA	0	---	---	NO	NO					NO	NO	NO	YES	0			YES
SMR3571	EC	Patient Diary		AGE	1	3	23	Age, calculated		0	0		0	0	0	192	26729	V9	2017-10-13 16:55:47	2017-10-13 16:55:47	0	NONE	DATA	0	---	---	NO	NO					NO	NO	NO	YES	0			YES
SMR3571	EC	Patient Diary		SEX	1	8	24	Sex	SEX	0	0		0	0	0	88	26729	V9	2017-10-13 16:55:47	2017-10-13 16:55:47	0	NONE	DATA	0	---	---	NO	NO					NO	NO	NO	YES	0			YES
SMR3571	EC	Patient Diary		FIRSTDT	1	8	25	First Dose Date	DATE	9	0		0	0	0	96	26729	V9	2017-10-13 16:55:47	2017-10-13 16:55:47	0	NONE	DATA	0	---	---	NO	NO					NO	NO	NO	YES	0			YES
SMR3571	EC	Patient Diary		RANDNO	1	8	26	Randomization Number		0	0		0	0	0	104	26729	V9	2017-10-13 16:55:47	2017-10-13 16:55:47	0	NONE	DATA	0	---	---	NO	NO					NO	NO	NO	YES	0			YES
SMR3571	EC	Patient Diary		TREAT	1	8	27	Treatment Group	TREAT	0	0		0	0	0	112	26729	V9	2017-10-13 16:55:47	2017-10-13 16:55:47	0	NONE	DATA	0	---	---	NO	NO					NO	NO	NO	YES	0			YES
SMR3571	EC	Patient Diary		OMEGA	1	8	28	Omega-3 Intake (randomization)	OMEGA	0	0		0	0	0	120	26729	V9	2017-10-13 16:55:47	2017-10-13 16:55:47	0	NONE	DATA	0	---	---	NO	NO					NO	NO	NO	YES	0			YES
SMR3571	EC	Patient Diary		DIABETE	1	8	29	Diabetes (randomization)	YN	0	0		0	0	0	128	26729	V9	2017-10-13 16:55:47	2017-10-13 16:55:47	0	NONE	DATA	0	---	---	NO	NO					NO	NO	NO	YES	0			YES
SMR3571	EC	Patient Diary		STATIN	1	8	30	Statins (randomization)	YN	0	0		0	0	0	136	26729	V9	2017-10-13 16:55:47	2017-10-13 16:55:47	0	NONE	DATA	0	---	---	NO	NO					NO	NO	NO	YES	0			YES
SMR3571	EC	Patient Diary		OMEGA_C	1	8	31	Omega-3 Intake (reported)	OMEGA	0	0		0	0	0	144	26729	V9	2017-10-13 16:55:47	2017-10-13 16:55:47	0	NONE	DATA	0	---	---	NO	NO					NO	NO	NO	YES	0			YES
SMR3571	EC	Patient Diary		SFFL	1	8	32	Screen Failure Flag	YN	0	0		0	0	0	152	26729	V9	2017-10-13 16:55:47	2017-10-13 16:55:47	0	NONE	DATA	0	---	---	NO	NO					NO	NO	NO	YES	0			YES
SMR3571	EC	Patient Diary		SAFETY	1	8	33	Safety Population	YN	0	0		0	0	0	160	26729	V9	2017-10-13 16:55:47	2017-10-13 16:55:47	0	NONE	DATA	0	---	---	NO	NO					NO	NO	NO	YES	0			YES
SMR3571	EC	Patient Diary		ITT	1	8	34	Intent to Treat Population	YN	0	0		0	0	0	168	26729	V9	2017-10-13 16:55:47	2017-10-13 16:55:47	0	NONE	DATA	0	---	---	NO	NO					NO	NO	NO	YES	0			YES
SMR3571	EC	Patient Diary		MITT	1	8	35	Modified Intent to Treat Population	YN	0	0		0	0	0	176	26729	V9	2017-10-13 16:55:47	2017-10-13 16:55:47	0	NONE	DATA	0	---	---	NO	NO					NO	NO	NO	YES	0			YES
SMR3571	EC	Patient Diary		PP	1	8	36	Per Protocol Population	YN	0	0		0	0	0	184	26729	V9	2017-10-13 16:55:47	2017-10-13 16:55:47	0	NONE	DATA	0	---	---	NO	NO					NO	NO	NO	YES	0			YES
SMR3571	FFQ	Food Frequency Questionnaire		FORM	2	28	1	Form		0	0		0	0	0	1512	225	V9	2017-10-13 16:55:47	2017-10-13 16:55:47	0	NONE	DATA	0	---	---	NO	NO					NO	NO	NO	YES	0			YES
SMR3571	FFQ	Food Frequency Questionnaire		MEAL	2	5	2	2. About how long ago was your last meal		0	0		0	0	0	1540	225	V9	2017-10-13 16:55:47	2017-10-13 16:55:47	0	NONE	DATA	0	---	---	NO	NO					NO	NO	NO	YES	0			YES
SMR3571	FFQ	Food Frequency Questionnaire		FSH1EPA	1	8	3	EPA per portion of fish (g) - Bass		0	0		0	0	0	0	225	V9	2017-10-13 16:55:47	2017-10-13 16:55:47	0	NONE	DATA	0	---	---	NO	NO					NO	NO	NO	YES	0			YES
SMR3571	FFQ	Food Frequency Questionnaire		FSH1DHA	1	8	4	DHA per portion of fish (g) - Bass		0	0		0	0	0	8	225	V9	2017-10-13 16:55:47	2017-10-13 16:55:47	0	NONE	DATA	0	---	---	NO	NO					NO	NO	NO	YES	0			YES
SMR3571	FFQ	Food Frequency Questionnaire		FSH1ALA	1	8	5	ALA per portion of fish (g) - Bass		0	0		0	0	0	16	225	V9	2017-10-13 16:55:47	2017-10-13 16:55:47	0	NONE	DATA	0	---	---	NO	NO					NO	NO	NO	YES	0			YES
SMR3571	FFQ	Food Frequency Questionnaire		FSH2EPA	1	8	6	EPA per portion of fish (g) - Bluefish		0	0		0	0	0	24	225	V9	2017-10-13 16:55:47	2017-10-13 16:55:47	0	NONE	DATA	0	---	---	NO	NO					NO	NO	NO	YES	0			YES
SMR3571	FFQ	Food Frequency Questionnaire		FSH2DHA	1	8	7	DHA per portion of fish (g) - Bluefish		0	0		0	0	0	32	225	V9	2017-10-13 16:55:47	2017-10-13 16:55:47	0	NONE	DATA	0	---	---	NO	NO					NO	NO	NO	YES	0			YES
SMR3571	FFQ	Food Frequency Questionnaire		FSH2ALA	1	3	8	ALA per portion of fish (g) - Bluefish		0	0		0	0	0	1464	225	V9	2017-10-13 16:55:47	2017-10-13 16:55:47	0	NONE	DATA	0	---	---	NO	NO					NO	NO	NO	YES	0			YES
SMR3571	FFQ	Food Frequency Questionnaire		FSH3EPA	1	8	9	EPA per portion of fish (g) - Catfish		0	0		0	0	0	40	225	V9	2017-10-13 16:55:47	2017-10-13 16:55:47	0	NONE	DATA	0	---	---	NO	NO					NO	NO	NO	YES	0			YES
SMR3571	FFQ	Food Frequency Questionnaire		FSH3DHA	1	8	10	DHA per portion of fish (g) - Catfish		0	0		0	0	0	48	225	V9	2017-10-13 16:55:47	2017-10-13 16:55:47	0	NONE	DATA	0	---	---	NO	NO					NO	NO	NO	YES	0			YES
SMR3571	FFQ	Food Frequency Questionnaire		FSH3ALA	1	8	11	ALA per portion of fish (g) - Catfish		0	0		0	0	0	56	225	V9	2017-10-13 16:55:47	2017-10-13 16:55:47	0	NONE	DATA	0	---	---	NO	NO					NO	NO	NO	YES	0			YES
SMR3571	FFQ	Food Frequency Questionnaire		FSH4EPA	1	8	12	EPA per portion of fish (g) - Clams		0	0		0	0	0	64	225	V9	2017-10-13 16:55:47	2017-10-13 16:55:47	0	NONE	DATA	0	---	---	NO	NO					NO	NO	NO	YES	0			YES
SMR3571	FFQ	Food Frequency Questionnaire		FSH4DHA	1	8	13	DHA per portion of fish (g) - Clams		0	0		0	0	0	72	225	V9	2017-10-13 16:55:47	2017-10-13 16:55:47	0	NONE	DATA	0	---	---	NO	NO					NO	NO	NO	YES	0			YES
SMR3571	FFQ	Food Frequency Questionnaire		FSH4ALA	1	8	14	ALA per portion of fish (g) - Clams		0	0		0	0	0	80	225	V9	2017-10-13 16:55:47	2017-10-13 16:55:47	0	NONE	DATA	0	---	---	NO	NO					NO	NO	NO	YES	0			YES
SMR3571	FFQ	Food Frequency Questionnaire		FSH5EPA	1	8	15	EPA per portion of fish (g) - Cod		0	0		0	0	0	88	225	V9	2017-10-13 16:55:47	2017-10-13 16:55:47	0	NONE	DATA	0	---	---	NO	NO					NO	NO	NO	YES	0			YES
SMR3571	FFQ	Food Frequency Questionnaire		FSH5DHA	1	8	16	DHA per portion of fish (g) - Cod		0	0		0	0	0	96	225	V9	2017-10-13 16:55:47	2017-10-13 16:55:47	0	NONE	DATA	0	---	---	NO	NO					NO	NO	NO	YES	0			YES
SMR3571	FFQ	Food Frequency Questionnaire		FSH5ALA	1	8	17	ALA per portion of fish (g) - Cod		0	0		0	0	0	104	225	V9	2017-10-13 16:55:47	2017-10-13 16:55:47	0	NONE	DATA	0	---	---	NO	NO					NO	NO	NO	YES	0			YES
SMR3571	FFQ	Food Frequency Questionnaire		FSH6EPA	1	8	18	EPA per portion of fish (g) - Crab		0	0		0	0	0	112	225	V9	2017-10-13 16:55:47	2017-10-13 16:55:47	0	NONE	DATA	0	---	---	NO	NO					NO	NO	NO	YES	0			YES
SMR3571	FFQ	Food Frequency Questionnaire		FSH6DHA	1	8	19	DHA per portion of fish (g) - Crab		0	0		0	0	0	120	225	V9	2017-10-13 16:55:47	2017-10-13 16:55:47	0	NONE	DATA	0	---	---	NO	NO					NO	NO	NO	YES	0			YES
SMR3571	FFQ	Food Frequency Questionnaire		FSH6ALA	1	8	20	ALA per portion of fish (g) - Crab		0	0		0	0	0	128	225	V9	2017-10-13 16:55:47	2017-10-13 16:55:47	0	NONE	DATA	0	---	---	NO	NO					NO	NO	NO	YES	0			YES
SMR3571	FFQ	Food Frequency Questionnaire		FSH7EPA	1	8	21	EPA per portion of fish (g) - Flounder		0	0		0	0	0	136	225	V9	2017-10-13 16:55:47	2017-10-13 16:55:47	0	NONE	DATA	0	---	---	NO	NO					NO	NO	NO	YES	0			YES
SMR3571	FFQ	Food Frequency Questionnaire		FSH7DHA	1	8	22	DHA per portion of fish (g) - Flounder		0	0		0	0	0	144	225	V9	2017-10-13 16:55:47	2017-10-13 16:55:47	0	NONE	DATA	0	---	---	NO	NO					NO	NO	NO	YES	0			YES
SMR3571	FFQ	Food Frequency Questionnaire		FSH7ALA	1	8	23	ALA per portion of fish (g) - Flounder		0	0		0	0	0	152	225	V9	2017-10-13 16:55:47	2017-10-13 16:55:47	0	NONE	DATA	0	---	---	NO	NO					NO	NO	NO	YES	0			YES
SMR3571	FFQ	Food Frequency Questionnaire		FSH8EPA	1	8	24	EPA per portion of fish (g) - Haddock		0	0		0	0	0	160	225	V9	2017-10-13 16:55:47	2017-10-13 16:55:47	0	NONE	DATA	0	---	---	NO	NO					NO	NO	NO	YES	0			YES
SMR3571	FFQ	Food Frequency Questionnaire		FSH8DHA	1	8	25	DHA per portion of fish (g) - Haddock		0	0		0	0	0	168	225	V9	2017-10-13 16:55:47	2017-10-13 16:55:47	0	NONE	DATA	0	---	---	NO	NO					NO	NO	NO	YES	0			YES
SMR3571	FFQ	Food Frequency Questionnaire		FSH8ALA	1	8	26	ALA per portion of fish (g) - Haddock		0	0		0	0	0	176	225	V9	2017-10-13 16:55:47	2017-10-13 16:55:47	0	NONE	DATA	0	---	---	NO	NO					NO	NO	NO	YES	0			YES
SMR3571	FFQ	Food Frequency Questionnaire		FSH9EPA	1	8	27	EPA per portion of fish (g) - Halibut		0	0		0	0	0	184	225	V9	2017-10-13 16:55:47	2017-10-13 16:55:47	0	NONE	DATA	0	---	---	NO	NO					NO	NO	NO	YES	0			YES
SMR3571	FFQ	Food Frequency Questionnaire		FSH9DHA	1	8	28	DHA per portion of fish (g) - Halibut		0	0		0	0	0	192	225	V9	2017-10-13 16:55:47	2017-10-13 16:55:47	0	NONE	DATA	0	---	---	NO	NO					NO	NO	NO	YES	0			YES
SMR3571	FFQ	Food Frequency Questionnaire		FSH9ALA	1	8	29	ALA per portion of fish (g) - Halibut		0	0		0	0	0	200	225	V9	2017-10-13 16:55:47	2017-10-13 16:55:47	0	NONE	DATA	0	---	---	NO	NO					NO	NO	NO	YES	0			YES
SMR3571	FFQ	Food Frequency Questionnaire		FSH10EPA	1	3	30	EPA per portion of fish (g) - Herring		0	0		0	0	0	1467	225	V9	2017-10-13 16:55:47	2017-10-13 16:55:47	0	NONE	DATA	0	---	---	NO	NO					NO	NO	NO	YES	0			YES
SMR3571	FFQ	Food Frequency Questionnaire		FSH10DHA	1	3	31	DHA per portion of fish (g) - Herring		0	0		0	0	0	1470	225	V9	2017-10-13 16:55:47	2017-10-13 16:55:47	0	NONE	DATA	0	---	---	NO	NO					NO	NO	NO	YES	0			YES
SMR3571	FFQ	Food Frequency Questionnaire		FSH10ALA	1	3	32	ALA per portion of fish (g) - Herring		0	0		0	0	0	1473	225	V9	2017-10-13 16:55:47	2017-10-13 16:55:47	0	NONE	DATA	0	---	---	NO	NO					NO	NO	NO	YES	0			YES
SMR3571	FFQ	Food Frequency Questionnaire		FSH11EPA	1	8	33	EPA per portion of fish (g) - Kingfish		0	0		0	0	0	208	225	V9	2017-10-13 16:55:47	2017-10-13 16:55:47	0	NONE	DATA	0	---	---	NO	NO					NO	NO	NO	YES	0			YES
SMR3571	FFQ	Food Frequency Questionnaire		FSH11DHA	1	8	34	DHA per portion of fish (g) - Kingfish		0	0		0	0	0	216	225	V9	2017-10-13 16:55:47	2017-10-13 16:55:47	0	NONE	DATA	0	---	---	NO	NO					NO	NO	NO	YES	0			YES
SMR3571	FFQ	Food Frequency Questionnaire		FSH11ALA	1	3	35	ALA per portion of fish (g) - Kingfish		0	0		0	0	0	1476	225	V9	2017-10-13 16:55:47	2017-10-13 16:55:47	0	NONE	DATA	0	---	---	NO	NO					NO	NO	NO	YES	0			YES
SMR3571	FFQ	Food Frequency Questionnaire		FSH12EPA	1	8	36	EPA per portion of fish (g) - Lobster		0	0		0	0	0	224	225	V9	2017-10-13 16:55:47	2017-10-13 16:55:47	0	NONE	DATA	0	---	---	NO	NO					NO	NO	NO	YES	0			YES
SMR3571	FFQ	Food Frequency Questionnaire		FSH12DHA	1	8	37	DHA per portion of fish (g) - Lobster		0	0		0	0	0	232	225	V9	2017-10-13 16:55:47	2017-10-13 16:55:47	0	NONE	DATA	0	---	---	NO	NO					NO	NO	NO	YES	0			YES
SMR3571	FFQ	Food Frequency Questionnaire		FSH12ALA	1	8	38	ALA per portion of fish (g) - Lobster		0	0		0	0	0	240	225	V9	2017-10-13 16:55:47	2017-10-13 16:55:47	0	NONE	DATA	0	---	---	NO	NO					NO	NO	NO	YES	0			YES
SMR3571	FFQ	Food Frequency Questionnaire		FSH13EPA	1	8	39	EPA per portion of fish (g) - Mackerel		0	0		0	0	0	248	225	V9	2017-10-13 16:55:47	2017-10-13 16:55:47	0	NONE	DATA	0	---	---	NO	NO					NO	NO	NO	YES	0			YES
SMR3571	FFQ	Food Frequency Questionnaire		FSH13DHA	1	8	40	DHA per portion of fish (g) - Mackerel		0	0		0	0	0	256	225	V9	2017-10-13 16:55:47	2017-10-13 16:55:47	0	NONE	DATA	0	---	---	NO	NO					NO	NO	NO	YES	0			YES
SMR3571	FFQ	Food Frequency Questionnaire		FSH13ALA	1	3	41	ALA per portion of fish (g) - Mackerel		0	0		0	0	0	1479	225	V9	2017-10-13 16:55:47	2017-10-13 16:55:47	0	NONE	DATA	0	---	---	NO	NO					NO	NO	NO	YES	0			YES
SMR3571	FFQ	Food Frequency Questionnaire		FSH14EPA	1	8	42	EPA per portion of fish (g) - Mahi Mahi		0	0		0	0	0	264	225	V9	2017-10-13 16:55:47	2017-10-13 16:55:47	0	NONE	DATA	0	---	---	NO	NO					NO	NO	NO	YES	0			YES
SMR3571	FFQ	Food Frequency Questionnaire		FSH14DHA	1	8	43	DHA per portion of fish (g) - Mahi Mahi		0	0		0	0	0	272	225	V9	2017-10-13 16:55:47	2017-10-13 16:55:47	0	NONE	DATA	0	---	---	NO	NO					NO	NO	NO	YES	0			YES
SMR3571	FFQ	Food Frequency Questionnaire		FSH14ALA	1	8	44	ALA per portion of fish (g) - Mahi Mahi		0	0		0	0	0	280	225	V9	2017-10-13 16:55:47	2017-10-13 16:55:47	0	NONE	DATA	0	---	---	NO	NO					NO	NO	NO	YES	0			YES
SMR3571	FFQ	Food Frequency Questionnaire		FSH15EPA	1	8	45	EPA per portion of fish (g) - Mussels		0	0		0	0	0	288	225	V9	2017-10-13 16:55:47	2017-10-13 16:55:47	0	NONE	DATA	0	---	---	NO	NO					NO	NO	NO	YES	0			YES
SMR3571	FFQ	Food Frequency Questionnaire		FSH15DHA	1	8	46	DHA per portion of fish (g) - Mussels		0	0		0	0	0	296	225	V9	2017-10-13 16:55:47	2017-10-13 16:55:47	0	NONE	DATA	0	---	---	NO	NO					NO	NO	NO	YES	0			YES
SMR3571	FFQ	Food Frequency Questionnaire		FSH15ALA	1	3	47	ALA per portion of fish (g) - Mussels		0	0		0	0	0	1482	225	V9	2017-10-13 16:55:47	2017-10-13 16:55:47	0	NONE	DATA	0	---	---	NO	NO					NO	NO	NO	YES	0			YES
SMR3571	FFQ	Food Frequency Questionnaire		FSH16EPA	1	8	48	EPA per portion of fish (g) - Oysters		0	0		0	0	0	304	225	V9	2017-10-13 16:55:47	2017-10-13 16:55:47	0	NONE	DATA	0	---	---	NO	NO					NO	NO	NO	YES	0			YES
SMR3571	FFQ	Food Frequency Questionnaire		FSH16DHA	1	8	49	DHA per portion of fish (g) - Oysters		0	0		0	0	0	312	225	V9	2017-10-13 16:55:47	2017-10-13 16:55:47	0	NONE	DATA	0	---	---	NO	NO					NO	NO	NO	YES	0			YES
SMR3571	FFQ	Food Frequency Questionnaire		FSH16ALA	1	8	50	ALA per portion of fish (g) - Oysters		0	0		0	0	0	320	225	V9	2017-10-13 16:55:47	2017-10-13 16:55:47	0	NONE	DATA	0	---	---	NO	NO					NO	NO	NO	YES	0			YES
SMR3571	FFQ	Food Frequency Questionnaire		FSH17EPA	1	8	51	EPA per portion of fish (g) - Salmon		0	0		0	0	0	328	225	V9	2017-10-13 16:55:47	2017-10-13 16:55:47	0	NONE	DATA	0	---	---	NO	NO					NO	NO	NO	YES	0			YES
SMR3571	FFQ	Food Frequency Questionnaire		FSH17DHA	1	8	52	DHA per portion of fish (g) - Salmon		0	0		0	0	0	336	225	V9	2017-10-13 16:55:47	2017-10-13 16:55:47	0	NONE	DATA	0	---	---	NO	NO					NO	NO	NO	YES	0			YES
SMR3571	FFQ	Food Frequency Questionnaire		FSH17ALA	1	8	53	ALA per portion of fish (g) - Salmon		0	0		0	0	0	344	225	V9	2017-10-13 16:55:47	2017-10-13 16:55:47	0	NONE	DATA	0	---	---	NO	NO					NO	NO	NO	YES	0			YES
SMR3571	FFQ	Food Frequency Questionnaire		FSH18EPA	1	8	54	EPA per portion of fish (g) - Sardines		0	0		0	0	0	352	225	V9	2017-10-13 16:55:47	2017-10-13 16:55:47	0	NONE	DATA	0	---	---	NO	NO					NO	NO	NO	YES	0			YES
SMR3571	FFQ	Food Frequency Questionnaire		FSH18DHA	1	8	55	DHA per portion of fish (g) - Sardines		0	0		0	0	0	360	225	V9	2017-10-13 16:55:47	2017-10-13 16:55:47	0	NONE	DATA	0	---	---	NO	NO					NO	NO	NO	YES	0			YES
SMR3571	FFQ	Food Frequency Questionnaire		FSH18ALA	1	8	56	ALA per portion of fish (g) - Sardines		0	0		0	0	0	368	225	V9	2017-10-13 16:55:47	2017-10-13 16:55:47	0	NONE	DATA	0	---	---	NO	NO					NO	NO	NO	YES	0			YES
SMR3571	FFQ	Food Frequency Questionnaire		FSH19EPA	1	8	57	EPA per portion of fish (g) - Scallops		0	0		0	0	0	376	225	V9	2017-10-13 16:55:47	2017-10-13 16:55:47	0	NONE	DATA	0	---	---	NO	NO					NO	NO	NO	YES	0			YES
SMR3571	FFQ	Food Frequency Questionnaire		FSH19DHA	1	8	58	DHA per portion of fish (g) - Scallops		0	0		0	0	0	384	225	V9	2017-10-13 16:55:47	2017-10-13 16:55:47	0	NONE	DATA	0	---	---	NO	NO					NO	NO	NO	YES	0			YES
SMR3571	FFQ	Food Frequency Questionnaire		FSH19ALA	1	3	59	ALA per portion of fish (g) - Scallops		0	0		0	0	0	1485	225	V9	2017-10-13 16:55:47	2017-10-13 16:55:47	0	NONE	DATA	0	---	---	NO	NO					NO	NO	NO	YES	0			YES
SMR3571	FFQ	Food Frequency Questionnaire		FSH20EPA	1	8	60	EPA per portion of fish (g) - Sea Trout		0	0		0	0	0	392	225	V9	2017-10-13 16:55:47	2017-10-13 16:55:47	0	NONE	DATA	0	---	---	NO	NO					NO	NO	NO	YES	0			YES
SMR3571	FFQ	Food Frequency Questionnaire		FSH20DHA	1	8	61	DHA per portion of fish (g) - Sea Trout		0	0		0	0	0	400	225	V9	2017-10-13 16:55:47	2017-10-13 16:55:47	0	NONE	DATA	0	---	---	NO	NO					NO	NO	NO	YES	0			YES
SMR3571	FFQ	Food Frequency Questionnaire		FSH20ALA	1	8	62	ALA per portion of fish (g) - Sea Trout		0	0		0	0	0	408	225	V9	2017-10-13 16:55:47	2017-10-13 16:55:47	0	NONE	DATA	0	---	---	NO	NO					NO	NO	NO	YES	0			YES
SMR3571	FFQ	Food Frequency Questionnaire		FSH21EPA	1	8	63	EPA per portion of fish (g) - Shark		0	0		0	0	0	416	225	V9	2017-10-13 16:55:47	2017-10-13 16:55:47	0	NONE	DATA	0	---	---	NO	NO					NO	NO	NO	YES	0			YES
SMR3571	FFQ	Food Frequency Questionnaire		FSH21DHA	1	8	64	DHA per portion of fish (g) - Shark		0	0		0	0	0	424	225	V9	2017-10-13 16:55:47	2017-10-13 16:55:47	0	NONE	DATA	0	---	---	NO	NO					NO	NO	NO	YES	0			YES
SMR3571	FFQ	Food Frequency Questionnaire		FSH21ALA	1	8	65	ALA per portion of fish (g) - Shark		0	0		0	0	0	432	225	V9	2017-10-13 16:55:47	2017-10-13 16:55:47	0	NONE	DATA	0	---	---	NO	NO					NO	NO	NO	YES	0			YES
SMR3571	FFQ	Food Frequency Questionnaire		FSH22EPA	1	8	66	EPA per portion of fish (g) - Shrimp		0	0		0	0	0	440	225	V9	2017-10-13 16:55:47	2017-10-13 16:55:47	0	NONE	DATA	0	---	---	NO	NO					NO	NO	NO	YES	0			YES
SMR3571	FFQ	Food Frequency Questionnaire		FSH22DHA	1	8	67	DHA per portion of fish (g) - Shrimp		0	0		0	0	0	448	225	V9	2017-10-13 16:55:47	2017-10-13 16:55:47	0	NONE	DATA	0	---	---	NO	NO					NO	NO	NO	YES	0			YES
SMR3571	FFQ	Food Frequency Questionnaire		FSH22ALA	1	8	68	ALA per portion of fish (g) - Shrimp		0	0		0	0	0	456	225	V9	2017-10-13 16:55:47	2017-10-13 16:55:47	0	NONE	DATA	0	---	---	NO	NO					NO	NO	NO	YES	0			YES
SMR3571	FFQ	Food Frequency Questionnaire		FSH23EPA	1	8	69	EPA per portion of fish (g) - Skate		0	0		0	0	0	464	225	V9	2017-10-13 16:55:47	2017-10-13 16:55:47	0	NONE	DATA	0	---	---	NO	NO					NO	NO	NO	YES	0			YES
SMR3571	FFQ	Food Frequency Questionnaire		FSH23DHA	1	8	70	DHA per portion of fish (g) - Skate		0	0		0	0	0	472	225	V9	2017-10-13 16:55:47	2017-10-13 16:55:47	0	NONE	DATA	0	---	---	NO	NO					NO	NO	NO	YES	0			YES
SMR3571	FFQ	Food Frequency Questionnaire		FSH23ALA	1	3	71	ALA per portion of fish (g) - Skate		0	0		0	0	0	1488	225	V9	2017-10-13 16:55:47	2017-10-13 16:55:47	0	NONE	DATA	0	---	---	NO	NO					NO	NO	NO	YES	0			YES
SMR3571	FFQ	Food Frequency Questionnaire		FSH24EPA	1	8	72	EPA per portion of fish (g) - Snapper		0	0		0	0	0	480	225	V9	2017-10-13 16:55:47	2017-10-13 16:55:47	0	NONE	DATA	0	---	---	NO	NO					NO	NO	NO	YES	0			YES
SMR3571	FFQ	Food Frequency Questionnaire		FSH24DHA	1	8	73	DHA per portion of fish (g) - Snapper		0	0		0	0	0	488	225	V9	2017-10-13 16:55:47	2017-10-13 16:55:47	0	NONE	DATA	0	---	---	NO	NO					NO	NO	NO	YES	0			YES
SMR3571	FFQ	Food Frequency Questionnaire		FSH24ALA	1	3	74	ALA per portion of fish (g) - Snapper		0	0		0	0	0	1491	225	V9	2017-10-13 16:55:47	2017-10-13 16:55:47	0	NONE	DATA	0	---	---	NO	NO					NO	NO	NO	YES	0			YES
SMR3571	FFQ	Food Frequency Questionnaire		FSH25EPA	1	8	75	EPA per portion of fish (g) - Sole		0	0		0	0	0	496	225	V9	2017-10-13 16:55:47	2017-10-13 16:55:47	0	NONE	DATA	0	---	---	NO	NO					NO	NO	NO	YES	0			YES
SMR3571	FFQ	Food Frequency Questionnaire		FSH25DHA	1	8	76	DHA per portion of fish (g) - Sole		0	0		0	0	0	504	225	V9	2017-10-13 16:55:47	2017-10-13 16:55:47	0	NONE	DATA	0	---	---	NO	NO					NO	NO	NO	YES	0			YES
SMR3571	FFQ	Food Frequency Questionnaire		FSH25ALA	1	8	77	ALA per portion of fish (g) - Sole		0	0		0	0	0	512	225	V9	2017-10-13 16:55:47	2017-10-13 16:55:47	0	NONE	DATA	0	---	---	NO	NO					NO	NO	NO	YES	0			YES
SMR3571	FFQ	Food Frequency Questionnaire		FSH26EPA	1	8	78	EPA per portion of fish (g) - Swordfish		0	0		0	0	0	520	225	V9	2017-10-13 16:55:47	2017-10-13 16:55:47	0	NONE	DATA	0	---	---	NO	NO					NO	NO	NO	YES	0			YES
SMR3571	FFQ	Food Frequency Questionnaire		FSH26DHA	1	8	79	DHA per portion of fish (g) - Swordfish		0	0		0	0	0	528	225	V9	2017-10-13 16:55:47	2017-10-13 16:55:47	0	NONE	DATA	0	---	---	NO	NO					NO	NO	NO	YES	0			YES
SMR3571	FFQ	Food Frequency Questionnaire		FSH26ALA	1	8	80	ALA per portion of fish (g) - Swordfish		0	0		0	0	0	536	225	V9	2017-10-13 16:55:47	2017-10-13 16:55:47	0	NONE	DATA	0	---	---	NO	NO					NO	NO	NO	YES	0			YES
SMR3571	FFQ	Food Frequency Questionnaire		FSH27EPA	1	8	81	EPA per portion of fish (g) - Tilapia		0	0		0	0	0	544	225	V9	2017-10-13 16:55:47	2017-10-13 16:55:47	0	NONE	DATA	0	---	---	NO	NO					NO	NO	NO	YES	0			YES
SMR3571	FFQ	Food Frequency Questionnaire		FSH27DHA	1	8	82	DHA per portion of fish (g) - Tilapia		0	0		0	0	0	552	225	V9	2017-10-13 16:55:47	2017-10-13 16:55:47	0	NONE	DATA	0	---	---	NO	NO					NO	NO	NO	YES	0			YES
SMR3571	FFQ	Food Frequency Questionnaire		FSH27ALA	1	8	83	ALA per portion of fish (g) - Tilapia		0	0		0	0	0	560	225	V9	2017-10-13 16:55:47	2017-10-13 16:55:47	0	NONE	DATA	0	---	---	NO	NO					NO	NO	NO	YES	0			YES
SMR3571	FFQ	Food Frequency Questionnaire		FSH28EPA	1	8	84	EPA per portion of fish (g) - Tilefish		0	0		0	0	0	568	225	V9	2017-10-13 16:55:47	2017-10-13 16:55:47	0	NONE	DATA	0	---	---	NO	NO					NO	NO	NO	YES	0			YES
SMR3571	FFQ	Food Frequency Questionnaire		FSH28DHA	1	8	85	DHA per portion of fish (g) - Tilefish		0	0		0	0	0	576	225	V9	2017-10-13 16:55:47	2017-10-13 16:55:47	0	NONE	DATA	0	---	---	NO	NO					NO	NO	NO	YES	0			YES
SMR3571	FFQ	Food Frequency Questionnaire		FSH28ALA	1	3	86	ALA per portion of fish (g) - Tilefish		0	0		0	0	0	1494	225	V9	2017-10-13 16:55:47	2017-10-13 16:55:47	0	NONE	DATA	0	---	---	NO	NO					NO	NO	NO	YES	0			YES
SMR3571	FFQ	Food Frequency Questionnaire		FSH29EPA	1	8	87	EPA per portion of fish (g) - Trout (fre		0	0		0	0	0	584	225	V9	2017-10-13 16:55:47	2017-10-13 16:55:47	0	NONE	DATA	0	---	---	NO	NO					NO	NO	NO	YES	0			YES
SMR3571	FFQ	Food Frequency Questionnaire		FSH29DHA	1	8	88	DHA per portion of fish (g) - Trout (fre		0	0		0	0	0	592	225	V9	2017-10-13 16:55:47	2017-10-13 16:55:47	0	NONE	DATA	0	---	---	NO	NO					NO	NO	NO	YES	0			YES
SMR3571	FFQ	Food Frequency Questionnaire		FSH29ALA	1	8	89	ALA per portion of fish (g) - Trout (fre		0	0		0	0	0	600	225	V9	2017-10-13 16:55:47	2017-10-13 16:55:47	0	NONE	DATA	0	---	---	NO	NO					NO	NO	NO	YES	0			YES
SMR3571	FFQ	Food Frequency Questionnaire		FSH30EPA	1	8	90	EPA per portion of fish (g) - Tuna		0	0		0	0	0	608	225	V9	2017-10-13 16:55:47	2017-10-13 16:55:47	0	NONE	DATA	0	---	---	NO	NO					NO	NO	NO	YES	0			YES
SMR3571	FFQ	Food Frequency Questionnaire		FSH30DHA	1	8	91	DHA per portion of fish (g) - Tuna		0	0		0	0	0	616	225	V9	2017-10-13 16:55:47	2017-10-13 16:55:47	0	NONE	DATA	0	---	---	NO	NO					NO	NO	NO	YES	0			YES
SMR3571	FFQ	Food Frequency Questionnaire		FSH30ALA	1	8	92	ALA per portion of fish (g) - Tuna		0	0		0	0	0	624	225	V9	2017-10-13 16:55:47	2017-10-13 16:55:47	0	NONE	DATA	0	---	---	NO	NO					NO	NO	NO	YES	0			YES
SMR3571	FFQ	Food Frequency Questionnaire		FSH31EPA	1	3	93	EPA per portion of fish (g) - Turbot		0	0		0	0	0	1497	225	V9	2017-10-13 16:55:47	2017-10-13 16:55:47	0	NONE	DATA	0	---	---	NO	NO					NO	NO	NO	YES	0			YES
SMR3571	FFQ	Food Frequency Questionnaire		FSH31DHA	1	3	94	DHA per portion of fish (g) - Turbot		0	0		0	0	0	1500	225	V9	2017-10-13 16:55:47	2017-10-13 16:55:47	0	NONE	DATA	0	---	---	NO	NO					NO	NO	NO	YES	0			YES
SMR3571	FFQ	Food Frequency Questionnaire		FSH31ALA	1	3	95	ALA per portion of fish (g) - Turbot		0	0		0	0	0	1503	225	V9	2017-10-13 16:55:47	2017-10-13 16:55:47	0	NONE	DATA	0	---	---	NO	NO					NO	NO	NO	YES	0			YES
SMR3571	FFQ	Food Frequency Questionnaire		FSH32EPA	1	8	96	EPA per portion of fish (g) - Whitefish		0	0		0	0	0	632	225	V9	2017-10-13 16:55:47	2017-10-13 16:55:47	0	NONE	DATA	0	---	---	NO	NO					NO	NO	NO	YES	0			YES
SMR3571	FFQ	Food Frequency Questionnaire		FSH32DHA	1	8	97	DHA per portion of fish (g) - Whitefish		0	0		0	0	0	640	225	V9	2017-10-13 16:55:47	2017-10-13 16:55:47	0	NONE	DATA	0	---	---	NO	NO					NO	NO	NO	YES	0			YES
SMR3571	FFQ	Food Frequency Questionnaire		FSH32ALA	1	8	98	ALA per portion of fish (g) - Whitefish		0	0		0	0	0	648	225	V9	2017-10-13 16:55:47	2017-10-13 16:55:47	0	NONE	DATA	0	---	---	NO	NO					NO	NO	NO	YES	0			YES
SMR3571	FFQ	Food Frequency Questionnaire		FSH33EPA	1	8	99	EPA per portion of fish (g) - Whiting		0	0		0	0	0	656	225	V9	2017-10-13 16:55:47	2017-10-13 16:55:47	0	NONE	DATA	0	---	---	NO	NO					NO	NO	NO	YES	0			YES
SMR3571	FFQ	Food Frequency Questionnaire		FSH33DHA	1	8	100	DHA per portion of fish (g) - Whiting		0	0		0	0	0	664	225	V9	2017-10-13 16:55:47	2017-10-13 16:55:47	0	NONE	DATA	0	---	---	NO	NO					NO	NO	NO	YES	0			YES
SMR3571	FFQ	Food Frequency Questionnaire		FSH33ALA	1	8	101	ALA per portion of fish (g) - Whiting		0	0		0	0	0	672	225	V9	2017-10-13 16:55:47	2017-10-13 16:55:47	0	NONE	DATA	0	---	---	NO	NO					NO	NO	NO	YES	0			YES
SMR3571	FFQ	Food Frequency Questionnaire		EPA1_17	1	8	102	EPA1_17SUM		0	0		0	0	0	680	225	V9	2017-10-13 16:55:47	2017-10-13 16:55:47	0	NONE	DATA	0	---	---	NO	NO					NO	NO	NO	YES	0			YES
SMR3571	FFQ	Food Frequency Questionnaire		EPA18_33	1	8	103	EPA18_33SUM		0	0		0	0	0	688	225	V9	2017-10-13 16:55:47	2017-10-13 16:55:47	0	NONE	DATA	0	---	---	NO	NO					NO	NO	NO	YES	0			YES
SMR3571	FFQ	Food Frequency Questionnaire		DHA1_17	1	8	104	DHA1_17SUM		0	0		0	0	0	696	225	V9	2017-10-13 16:55:47	2017-10-13 16:55:47	0	NONE	DATA	0	---	---	NO	NO					NO	NO	NO	YES	0			YES
SMR3571	FFQ	Food Frequency Questionnaire		DHA18_33	1	8	105	DHA18_33SUM		0	0		0	0	0	704	225	V9	2017-10-13 16:55:47	2017-10-13 16:55:47	0	NONE	DATA	0	---	---	NO	NO					NO	NO	NO	YES	0			YES
SMR3571	FFQ	Food Frequency Questionnaire		ALA1_17	1	8	106	ALA1_17SUM		0	0		0	0	0	712	225	V9	2017-10-13 16:55:47	2017-10-13 16:55:47	0	NONE	DATA	0	---	---	NO	NO					NO	NO	NO	YES	0			YES
SMR3571	FFQ	Food Frequency Questionnaire		ALA18_33	1	8	107	ALA18_33SUM		0	0		0	0	0	720	225	V9	2017-10-13 16:55:47	2017-10-13 16:55:47	0	NONE	DATA	0	---	---	NO	NO					NO	NO	NO	YES	0			YES
SMR3571	FFQ	Food Frequency Questionnaire		FSHTYPN	1	3	108	Number of fish types eaten		0	0		0	0	0	1506	225	V9	2017-10-13 16:55:47	2017-10-13 16:55:47	0	NONE	DATA	0	---	---	NO	NO					NO	NO	NO	YES	0			YES
SMR3571	FFQ	Food Frequency Questionnaire		C_FSHPA6	1	8	109	Frequency		0	0		0	0	0	728	225	V9	2017-10-13 16:55:47	2017-10-13 16:55:47	0	NONE	DATA	0	---	---	NO	NO					NO	NO	NO	YES	0			YES
SMR3571	FFQ	Food Frequency Questionnaire		FSH_EPA	1	8	110	Total EPA (g/day) from fish		0	0		0	0	0	736	225	V9	2017-10-13 16:55:47	2017-10-13 16:55:47	0	NONE	DATA	0	---	---	NO	NO					NO	NO	NO	YES	0			YES
SMR3571	FFQ	Food Frequency Questionnaire		FSH_DHA	1	8	111	Total DHA (g/day) from fish		0	0		0	0	0	744	225	V9	2017-10-13 16:55:47	2017-10-13 16:55:47	0	NONE	DATA	0	---	---	NO	NO					NO	NO	NO	YES	0			YES
SMR3571	FFQ	Food Frequency Questionnaire		FSH_ALA	1	8	112	Total ALA (g/day) from fish		0	0		0	0	0	752	225	V9	2017-10-13 16:55:47	2017-10-13 16:55:47	0	NONE	DATA	0	---	---	NO	NO					NO	NO	NO	YES	0			YES
SMR3571	FFQ	Food Frequency Questionnaire		C_WALPA6	1	8	113	Frequency (times/day) - Walnuts		0	0		0	0	0	760	225	V9	2017-10-13 16:55:47	2017-10-13 16:55:47	0	NONE	DATA	0	---	---	NO	NO					NO	NO	NO	YES	0			YES
SMR3571	FFQ	Food Frequency Questionnaire		WAL_ALA	1	8	114	ALA (g/day) - Walnuts		0	0		0	0	0	768	225	V9	2017-10-13 16:55:47	2017-10-13 16:55:47	0	NONE	DATA	0	---	---	NO	NO					NO	NO	NO	YES	0			YES
SMR3571	FFQ	Food Frequency Questionnaire		CANPA6	1	8	115	Frequency (times/day) - Canola oil		0	0		0	0	0	776	225	V9	2017-10-13 16:55:47	2017-10-13 16:55:47	0	NONE	DATA	0	---	---	NO	NO					NO	NO	NO	YES	0			YES
SMR3571	FFQ	Food Frequency Questionnaire		CAN_ALA	1	8	116	ALA (g/day) - Canola oil		0	0		0	0	0	784	225	V9	2017-10-13 16:55:47	2017-10-13 16:55:47	0	NONE	DATA	0	---	---	NO	NO					NO	NO	NO	YES	0			YES
SMR3571	FFQ	Food Frequency Questionnaire		C_FLAPA6	1	8	117	Frequency (times/day) - Flaxseeds		0	0		0	0	0	792	225	V9	2017-10-13 16:55:47	2017-10-13 16:55:47	0	NONE	DATA	0	---	---	NO	NO					NO	NO	NO	YES	0			YES
SMR3571	FFQ	Food Frequency Questionnaire		FLA_ALA	1	8	118	ALA (g/day) - Flaxseeds		0	0		0	0	0	800	225	V9	2017-10-13 16:55:47	2017-10-13 16:55:47	0	NONE	DATA	0	---	---	NO	NO					NO	NO	NO	YES	0			YES
SMR3571	FFQ	Food Frequency Questionnaire		FLOPA6	1	8	119	Frequency (times/day) - Flaxseed oil		0	0		0	0	0	808	225	V9	2017-10-13 16:55:47	2017-10-13 16:55:47	0	NONE	DATA	0	---	---	NO	NO					NO	NO	NO	YES	0			YES
SMR3571	FFQ	Food Frequency Questionnaire		FLO_ALA	1	8	120	ALA (g/day) - Flaxseed oil		0	0		0	0	0	816	225	V9	2017-10-13 16:55:47	2017-10-13 16:55:47	0	NONE	DATA	0	---	---	NO	NO					NO	NO	NO	YES	0			YES
SMR3571	FFQ	Food Frequency Questionnaire		C_CODPA6	1	8	121	Frequency (times/day) - Cod liver oil		0	0		0	0	0	824	225	V9	2017-10-13 16:55:47	2017-10-13 16:55:47	0	NONE	DATA	0	---	---	NO	NO					NO	NO	NO	YES	0			YES
SMR3571	FFQ	Food Frequency Questionnaire		COD_EPA	1	8	122	EPA (g/day) - Cod liver oil		0	0		0	0	0	832	225	V9	2017-10-13 16:55:47	2017-10-13 16:55:47	0	NONE	DATA	0	---	---	NO	NO					NO	NO	NO	YES	0			YES
SMR3571	FFQ	Food Frequency Questionnaire		COD_DHA	1	8	123	DHA (g/day) - Cod liver oil		0	0		0	0	0	840	225	V9	2017-10-13 16:55:47	2017-10-13 16:55:47	0	NONE	DATA	0	---	---	NO	NO					NO	NO	NO	YES	0			YES
SMR3571	FFQ	Food Frequency Questionnaire		COD_ALA	1	8	124	ALA (g/day) - Cod liver oil		0	0		0	0	0	848	225	V9	2017-10-13 16:55:47	2017-10-13 16:55:47	0	NONE	DATA	0	---	---	NO	NO					NO	NO	NO	YES	0			YES
SMR3571	FFQ	Food Frequency Questionnaire		FOOD_EPA	1	8	125	EPA (g/day) - Total Omega-3s from food		0	0		0	0	0	856	225	V9	2017-10-13 16:55:47	2017-10-13 16:55:47	0	NONE	DATA	0	---	---	NO	NO					NO	NO	NO	YES	0			YES
SMR3571	FFQ	Food Frequency Questionnaire		FOOD_DHA	1	8	126	DHA (g/day) - Total Omega-3s from food		0	0		0	0	0	864	225	V9	2017-10-13 16:55:47	2017-10-13 16:55:47	0	NONE	DATA	0	---	---	NO	NO					NO	NO	NO	YES	0			YES
SMR3571	FFQ	Food Frequency Questionnaire		FOOD_ALA	1	8	127	ALA (g/day) - Total Omega-3s from food		0	0		0	0	0	872	225	V9	2017-10-13 16:55:47	2017-10-13 16:55:47	0	NONE	DATA	0	---	---	NO	NO					NO	NO	NO	YES	0			YES
SMR3571	FFQ	Food Frequency Questionnaire		NAMESUP	2	25	128	Name of supplement		0	0		0	0	0	1545	225	V9	2017-10-13 16:55:47	2017-10-13 16:55:47	0	NONE	DATA	0	---	---	NO	NO					NO	NO	NO	YES	0			YES
SMR3571	FFQ	Food Frequency Questionnaire		DOSPILG	1	8	129	Grams of EPA+DHA per pill or capsule:		0	0		0	0	0	880	225	V9	2017-10-13 16:55:47	2017-10-13 16:55:47	0	NONE	DATA	0	---	---	NO	NO					NO	NO	NO	YES	0			YES
SMR3571	FFQ	Food Frequency Questionnaire		DOSLIQG	1	8	130	Grams of EPA+DHA per Tablespoon		0	0		0	0	0	888	225	V9	2017-10-13 16:55:47	2017-10-13 16:55:47	0	NONE	DATA	0	---	---	NO	NO					NO	NO	NO	YES	0			YES
SMR3571	FFQ	Food Frequency Questionnaire		SUP_PIL	1	8	131	Omega-3 from pill or capsule		0	0		0	0	0	896	225	V9	2017-10-13 16:55:47	2017-10-13 16:55:47	0	NONE	DATA	0	---	---	NO	NO					NO	NO	NO	YES	0			YES
SMR3571	FFQ	Food Frequency Questionnaire		SUP_LIQ	1	8	132	Omega-3 from liquid		0	0		0	0	0	904	225	V9	2017-10-13 16:55:47	2017-10-13 16:55:47	0	NONE	DATA	0	---	---	NO	NO					NO	NO	NO	YES	0			YES
SMR3571	FFQ	Food Frequency Questionnaire		SUP_TOT	1	8	133	Total omega-3 (g/day) from supplements		0	0		0	0	0	912	225	V9	2017-10-13 16:55:47	2017-10-13 16:55:47	0	NONE	DATA	0	---	---	NO	NO					NO	NO	NO	YES	0			YES
SMR3571	FFQ	Food Frequency Questionnaire		TOTOMEGA	1	8	134	Total Omega-3 (g/day) from all sources		0	0		0	0	0	920	225	V9	2017-10-13 16:55:47	2017-10-13 16:55:47	0	NONE	DATA	0	---	---	NO	NO					NO	NO	NO	YES	0			YES
SMR3571	FFQ	Food Frequency Questionnaire		EPADHA	1	8	135	Total intake (g/day) of EPA and DHA		0	0		0	0	0	928	225	V9	2017-10-13 16:55:47	2017-10-13 16:55:47	0	NONE	DATA	0	---	---	NO	NO					NO	NO	NO	YES	0			YES
SMR3571	FFQ	Food Frequency Questionnaire		OMEGARNG	2	4	136	Omega range		0	0		0	0	0	1570	225	V9	2017-10-13 16:55:47	2017-10-13 16:55:47	0	NONE	DATA	0	---	---	NO	NO					NO	NO	NO	YES	0			YES
SMR3571	FFQ	Food Frequency Questionnaire		CANAMT	1	8	137	11. Each time you used canola cooking oi	CANAMT	0	0		0	0	0	936	225	V9	2017-10-13 16:55:47	2017-10-13 16:55:47	0	NONE	DATA	0	---	---	NO	NO					NO	NO	NO	YES	0			YES
SMR3571	FFQ	Food Frequency Questionnaire		CANPAST6	1	8	138	10. In the past 6 months, about how ofte	CANPAST6_	0	0		0	0	0	944	225	V9	2017-10-13 16:55:47	2017-10-13 16:55:47	0	NONE	DATA	0	---	---	NO	NO					NO	NO	NO	YES	0			YES
SMR3571	FFQ	Food Frequency Questionnaire		CODAMT	1	8	139	17. Each time you used cod liver oil, ho	CODAMT	0	0		0	0	0	952	225	V9	2017-10-13 16:55:47	2017-10-13 16:55:47	0	NONE	DATA	0	---	---	NO	NO					NO	NO	NO	YES	0			YES
SMR3571	FFQ	Food Frequency Questionnaire		CODPAST6	1	8	140	16. In the past 6 months, about how ofte	CODPAST6_	0	0		0	0	0	960	225	V9	2017-10-13 16:55:47	2017-10-13 16:55:47	0	NONE	DATA	0	---	---	NO	NO					NO	NO	NO	YES	0			YES
SMR3571	FFQ	Food Frequency Questionnaire		FFQGNDR	1	8	141	1. Gender	FFQ_GENDER	0	0		0	0	0	968	225	V9	2017-10-13 16:55:47	2017-10-13 16:55:47	0	NONE	DATA	0	---	---	NO	NO					NO	NO	NO	YES	0			YES
SMR3571	FFQ	Food Frequency Questionnaire		FLAAMT	1	8	142	13. Each time you ate flaxseeds, about h	FLAXAMT	0	0		0	0	0	976	225	V9	2017-10-13 16:55:47	2017-10-13 16:55:47	0	NONE	DATA	0	---	---	NO	NO					NO	NO	NO	YES	0			YES
SMR3571	FFQ	Food Frequency Questionnaire		FLAPAST6	1	8	143	12. In the past 6 months, about how ofte	FLAXPAST6_	0	0		0	0	0	984	225	V9	2017-10-13 16:55:47	2017-10-13 16:55:47	0	NONE	DATA	0	---	---	NO	NO					NO	NO	NO	YES	0			YES
SMR3571	FFQ	Food Frequency Questionnaire		FLOAMT	1	8	144	15. Each time you used flaxseed oil, how	FLOILAMT	0	0		0	0	0	992	225	V9	2017-10-13 16:55:47	2017-10-13 16:55:47	0	NONE	DATA	0	---	---	NO	NO					NO	NO	NO	YES	0			YES
SMR3571	FFQ	Food Frequency Questionnaire		FLOPAST6	1	8	145	14. In the past 6 months, about how ofte	FLOILPAST6_	0	0		0	0	0	1000	225	V9	2017-10-13 16:55:47	2017-10-13 16:55:47	0	NONE	DATA	0	---	---	NO	NO					NO	NO	NO	YES	0			YES
SMR3571	FFQ	Food Frequency Questionnaire		FSH24	1	8	146	3. Have you eaten any fish or shellfish	YN	0	0		0	0	0	1008	225	V9	2017-10-13 16:55:47	2017-10-13 16:55:47	0	NONE	DATA	0	---	---	NO	NO					NO	NO	NO	YES	0			YES
SMR3571	FFQ	Food Frequency Questionnaire		FSHAMT	1	8	147	6. Each time you ate fish or shellfish,	FSHAMT	0	0		0	0	0	1016	225	V9	2017-10-13 16:55:47	2017-10-13 16:55:47	0	NONE	DATA	0	---	---	NO	NO					NO	NO	NO	YES	0			YES
SMR3571	FFQ	Food Frequency Questionnaire		FSHPAST6	1	8	148	5. Over the past 6 months, about how oft	FSHPAST6_	0	0		0	0	0	1024	225	V9	2017-10-13 16:55:47	2017-10-13 16:55:47	0	NONE	DATA	0	---	---	NO	NO					NO	NO	NO	YES	0			YES
SMR3571	FFQ	Food Frequency Questionnaire		FSHTYP1	1	8	149	1) Bass	YN	0	0		0	0	0	1032	225	V9	2017-10-13 16:55:47	2017-10-13 16:55:47	0	NONE	DATA	0	---	---	NO	NO					NO	NO	NO	YES	0			YES
SMR3571	FFQ	Food Frequency Questionnaire		FSHTYP10	1	8	150	10) Herring	YN	0	0		0	0	0	1040	225	V9	2017-10-13 16:55:47	2017-10-13 16:55:47	0	NONE	DATA	0	---	---	NO	NO					NO	NO	NO	YES	0			YES
SMR3571	FFQ	Food Frequency Questionnaire		FSHTYP11	1	8	151	11) Kingfish	YN	0	0		0	0	0	1048	225	V9	2017-10-13 16:55:47	2017-10-13 16:55:47	0	NONE	DATA	0	---	---	NO	NO					NO	NO	NO	YES	0			YES
SMR3571	FFQ	Food Frequency Questionnaire		FSHTYP12	1	8	152	12) Lobster	YN	0	0		0	0	0	1056	225	V9	2017-10-13 16:55:47	2017-10-13 16:55:47	0	NONE	DATA	0	---	---	NO	NO					NO	NO	NO	YES	0			YES
SMR3571	FFQ	Food Frequency Questionnaire		FSHTYP13	1	8	153	13) Mackerel	YN	0	0		0	0	0	1064	225	V9	2017-10-13 16:55:47	2017-10-13 16:55:47	0	NONE	DATA	0	---	---	NO	NO					NO	NO	NO	YES	0			YES
SMR3571	FFQ	Food Frequency Questionnaire		FSHTYP14	1	8	154	14) Mahi Mahi	YN	0	0		0	0	0	1072	225	V9	2017-10-13 16:55:47	2017-10-13 16:55:47	0	NONE	DATA	0	---	---	NO	NO					NO	NO	NO	YES	0			YES
SMR3571	FFQ	Food Frequency Questionnaire		FSHTYP15	1	8	155	15) Mussels	YN	0	0		0	0	0	1080	225	V9	2017-10-13 16:55:47	2017-10-13 16:55:47	0	NONE	DATA	0	---	---	NO	NO					NO	NO	NO	YES	0			YES
SMR3571	FFQ	Food Frequency Questionnaire		FSHTYP16	1	8	156	16) Oysters	YN	0	0		0	0	0	1088	225	V9	2017-10-13 16:55:47	2017-10-13 16:55:47	0	NONE	DATA	0	---	---	NO	NO					NO	NO	NO	YES	0			YES
SMR3571	FFQ	Food Frequency Questionnaire		FSHTYP17	1	8	157	17) Salmon	YN	0	0		0	0	0	1096	225	V9	2017-10-13 16:55:47	2017-10-13 16:55:47	0	NONE	DATA	0	---	---	NO	NO					NO	NO	NO	YES	0			YES
SMR3571	FFQ	Food Frequency Questionnaire		FSHTYP18	1	8	158	18) Sardines	YN	0	0		0	0	0	1104	225	V9	2017-10-13 16:55:47	2017-10-13 16:55:47	0	NONE	DATA	0	---	---	NO	NO					NO	NO	NO	YES	0			YES
SMR3571	FFQ	Food Frequency Questionnaire		FSHTYP19	1	8	159	19) Scallops	YN	0	0		0	0	0	1112	225	V9	2017-10-13 16:55:47	2017-10-13 16:55:47	0	NONE	DATA	0	---	---	NO	NO					NO	NO	NO	YES	0			YES
SMR3571	FFQ	Food Frequency Questionnaire		FSHTYP2	1	8	160	2) Bluefish	YN	0	0		0	0	0	1120	225	V9	2017-10-13 16:55:47	2017-10-13 16:55:47	0	NONE	DATA	0	---	---	NO	NO					NO	NO	NO	YES	0			YES
SMR3571	FFQ	Food Frequency Questionnaire		FSHTYP20	1	8	161	20) Sea Trout	YN	0	0		0	0	0	1128	225	V9	2017-10-13 16:55:47	2017-10-13 16:55:47	0	NONE	DATA	0	---	---	NO	NO					NO	NO	NO	YES	0			YES
SMR3571	FFQ	Food Frequency Questionnaire		FSHTYP21	1	8	162	21) Shark	YN	0	0		0	0	0	1136	225	V9	2017-10-13 16:55:47	2017-10-13 16:55:47	0	NONE	DATA	0	---	---	NO	NO					NO	NO	NO	YES	0			YES
SMR3571	FFQ	Food Frequency Questionnaire		FSHTYP22	1	8	163	22) Shrimp	YN	0	0		0	0	0	1144	225	V9	2017-10-13 16:55:47	2017-10-13 16:55:47	0	NONE	DATA	0	---	---	NO	NO					NO	NO	NO	YES	0			YES
SMR3571	FFQ	Food Frequency Questionnaire		FSHTYP23	1	8	164	23) Skate	YN	0	0		0	0	0	1152	225	V9	2017-10-13 16:55:47	2017-10-13 16:55:47	0	NONE	DATA	0	---	---	NO	NO					NO	NO	NO	YES	0			YES
SMR3571	FFQ	Food Frequency Questionnaire		FSHTYP24	1	8	165	24) Snapper	YN	0	0		0	0	0	1160	225	V9	2017-10-13 16:55:47	2017-10-13 16:55:47	0	NONE	DATA	0	---	---	NO	NO					NO	NO	NO	YES	0			YES
SMR3571	FFQ	Food Frequency Questionnaire		FSHTYP25	1	8	166	25) Sole	YN	0	0		0	0	0	1168	225	V9	2017-10-13 16:55:47	2017-10-13 16:55:47	0	NONE	DATA	0	---	---	NO	NO					NO	NO	NO	YES	0			YES
SMR3571	FFQ	Food Frequency Questionnaire		FSHTYP26	1	8	167	26) Swordfish	YN	0	0		0	0	0	1176	225	V9	2017-10-13 16:55:47	2017-10-13 16:55:47	0	NONE	DATA	0	---	---	NO	NO					NO	NO	NO	YES	0			YES
SMR3571	FFQ	Food Frequency Questionnaire		FSHTYP27	1	8	168	27) Tilapia	YN	0	0		0	0	0	1184	225	V9	2017-10-13 16:55:47	2017-10-13 16:55:47	0	NONE	DATA	0	---	---	NO	NO					NO	NO	NO	YES	0			YES
SMR3571	FFQ	Food Frequency Questionnaire		FSHTYP28	1	8	169	28) Tilefish	YN	0	0		0	0	0	1192	225	V9	2017-10-13 16:55:47	2017-10-13 16:55:47	0	NONE	DATA	0	---	---	NO	NO					NO	NO	NO	YES	0			YES
SMR3571	FFQ	Food Frequency Questionnaire		FSHTYP29	1	8	170	29) Trout (freshwater)	YN	0	0		0	0	0	1200	225	V9	2017-10-13 16:55:47	2017-10-13 16:55:47	0	NONE	DATA	0	---	---	NO	NO					NO	NO	NO	YES	0			YES
SMR3571	FFQ	Food Frequency Questionnaire		FSHTYP3	1	8	171	3) Catfish	YN	0	0		0	0	0	1208	225	V9	2017-10-13 16:55:47	2017-10-13 16:55:47	0	NONE	DATA	0	---	---	NO	NO					NO	NO	NO	YES	0			YES
SMR3571	FFQ	Food Frequency Questionnaire		FSHTYP30	1	8	172	30) Tuna	YN	0	0		0	0	0	1216	225	V9	2017-10-13 16:55:47	2017-10-13 16:55:47	0	NONE	DATA	0	---	---	NO	NO					NO	NO	NO	YES	0			YES
SMR3571	FFQ	Food Frequency Questionnaire		FSHTYP31	1	8	173	31) Turbot	YN	0	0		0	0	0	1224	225	V9	2017-10-13 16:55:47	2017-10-13 16:55:47	0	NONE	DATA	0	---	---	NO	NO					NO	NO	NO	YES	0			YES
SMR3571	FFQ	Food Frequency Questionnaire		FSHTYP32	1	8	174	32) Whitefish	YN	0	0		0	0	0	1232	225	V9	2017-10-13 16:55:47	2017-10-13 16:55:47	0	NONE	DATA	0	---	---	NO	NO					NO	NO	NO	YES	0			YES
SMR3571	FFQ	Food Frequency Questionnaire		FSHTYP33	1	8	175	33) Whiting	YN	0	0		0	0	0	1240	225	V9	2017-10-13 16:55:47	2017-10-13 16:55:47	0	NONE	DATA	0	---	---	NO	NO					NO	NO	NO	YES	0			YES
SMR3571	FFQ	Food Frequency Questionnaire		FSHTYP4	1	8	176	4) Clams	YN	0	0		0	0	0	1248	225	V9	2017-10-13 16:55:47	2017-10-13 16:55:47	0	NONE	DATA	0	---	---	NO	NO					NO	NO	NO	YES	0			YES
SMR3571	FFQ	Food Frequency Questionnaire		FSHTYP5	1	8	177	5) Cod	YN	0	0		0	0	0	1256	225	V9	2017-10-13 16:55:47	2017-10-13 16:55:47	0	NONE	DATA	0	---	---	NO	NO					NO	NO	NO	YES	0			YES
SMR3571	FFQ	Food Frequency Questionnaire		FSHTYP6	1	8	178	6) Crab	YN	0	0		0	0	0	1264	225	V9	2017-10-13 16:55:47	2017-10-13 16:55:47	0	NONE	DATA	0	---	---	NO	NO					NO	NO	NO	YES	0			YES
SMR3571	FFQ	Food Frequency Questionnaire		FSHTYP7	1	8	179	7) Flounder	YN	0	0		0	0	0	1272	225	V9	2017-10-13 16:55:47	2017-10-13 16:55:47	0	NONE	DATA	0	---	---	NO	NO					NO	NO	NO	YES	0			YES
SMR3571	FFQ	Food Frequency Questionnaire		FSHTYP8	1	8	180	8) Haddock	YN	0	0		0	0	0	1280	225	V9	2017-10-13 16:55:47	2017-10-13 16:55:47	0	NONE	DATA	0	---	---	NO	NO					NO	NO	NO	YES	0			YES
SMR3571	FFQ	Food Frequency Questionnaire		FSHTYP9	1	8	181	9) Halibut	YN	0	0		0	0	0	1288	225	V9	2017-10-13 16:55:47	2017-10-13 16:55:47	0	NONE	DATA	0	---	---	NO	NO					NO	NO	NO	YES	0			YES
SMR3571	FFQ	Food Frequency Questionnaire		FSHWK	1	8	182	4. How many times have you eaten fish or	FSHWK	0	0		0	0	0	1296	225	V9	2017-10-13 16:55:47	2017-10-13 16:55:47	0	NONE	DATA	0	---	---	NO	NO					NO	NO	NO	YES	0			YES
SMR3571	FFQ	Food Frequency Questionnaire		LIQAMT	1	8	183	If YES, how much did you take?	LIQAMT	0	0		0	0	0	1304	225	V9	2017-10-13 16:55:47	2017-10-13 16:55:47	0	NONE	DATA	0	---	---	NO	NO					NO	NO	NO	YES	0			YES
SMR3571	FFQ	Food Frequency Questionnaire		OMEGALIQ	1	8	184	20. Is the Omega 3 fatty acid or fish oi	YN	0	0		0	0	0	1312	225	V9	2017-10-13 16:55:47	2017-10-13 16:55:47	0	NONE	DATA	0	---	---	NO	NO					NO	NO	NO	YES	0			YES
SMR3571	FFQ	Food Frequency Questionnaire		OMEGAPIL	1	8	185	19. Is the Omega 3 fatty acid or fish oi	YN	0	0		0	0	0	1320	225	V9	2017-10-13 16:55:47	2017-10-13 16:55:47	0	NONE	DATA	0	---	---	NO	NO					NO	NO	NO	YES	0			YES
SMR3571	FFQ	Food Frequency Questionnaire		PILAMT	1	8	186	If YES, how many did you take?	PILLAMT	0	0		0	0	0	1328	225	V9	2017-10-13 16:55:47	2017-10-13 16:55:47	0	NONE	DATA	0	---	---	NO	NO					NO	NO	NO	YES	0			YES
SMR3571	FFQ	Food Frequency Questionnaire		SUPPAST6	1	8	187	18. In the past 6 months, have you used	YN	0	0		0	0	0	1336	225	V9	2017-10-13 16:55:47	2017-10-13 16:55:47	0	NONE	DATA	0	---	---	NO	NO					NO	NO	NO	YES	0			YES
SMR3571	FFQ	Food Frequency Questionnaire		WALAMT	1	8	188	9. Each time you ate walnuts, how much d	WALAMT	0	0		0	0	0	1344	225	V9	2017-10-13 16:55:47	2017-10-13 16:55:47	0	NONE	DATA	0	---	---	NO	NO					NO	NO	NO	YES	0			YES
SMR3571	FFQ	Food Frequency Questionnaire		WALPAST6	1	8	189	8. In the past 6 months, about how often	WALPAST6_	0	0		0	0	0	1352	225	V9	2017-10-13 16:55:47	2017-10-13 16:55:47	0	NONE	DATA	0	---	---	NO	NO					NO	NO	NO	YES	0			YES
SMR3571	FFQ	Food Frequency Questionnaire		SUBJID	2	10	190	Subject ID		0	0		0	0	0	1574	225	V9	2017-10-13 16:55:47	2017-10-13 16:55:47	0	NONE	DATA	0	---	---	NO	NO					NO	NO	NO	YES	0			YES
SMR3571	FFQ	Food Frequency Questionnaire		SITE	2	21	191	Site		0	0		0	0	0	1584	225	V9	2017-10-13 16:55:47	2017-10-13 16:55:47	0	NONE	DATA	0	---	---	NO	NO					NO	NO	NO	YES	0			YES
SMR3571	FFQ	Food Frequency Questionnaire		STATUS	2	17	192	Subject Status		0	0		0	0	0	1605	225	V9	2017-10-13 16:55:47	2017-10-13 16:55:47	0	NONE	DATA	0	---	---	NO	NO					NO	NO	NO	YES	0			YES
SMR3571	FFQ	Food Frequency Questionnaire		AGE	1	3	193	Age, calculated		0	0		0	0	0	1509	225	V9	2017-10-13 16:55:47	2017-10-13 16:55:47	0	NONE	DATA	0	---	---	NO	NO					NO	NO	NO	YES	0			YES
SMR3571	FFQ	Food Frequency Questionnaire		SEX	1	8	194	Sex	SEX	0	0		0	0	0	1360	225	V9	2017-10-13 16:55:47	2017-10-13 16:55:47	0	NONE	DATA	0	---	---	NO	NO					NO	NO	NO	YES	0			YES
SMR3571	FFQ	Food Frequency Questionnaire		FIRSTDT	1	8	195	First Dose Date	DATE	9	0		0	0	0	1368	225	V9	2017-10-13 16:55:47	2017-10-13 16:55:47	0	NONE	DATA	0	---	---	NO	NO					NO	NO	NO	YES	0			YES
SMR3571	FFQ	Food Frequency Questionnaire		RANDNO	1	8	196	Randomization Number		0	0		0	0	0	1376	225	V9	2017-10-13 16:55:47	2017-10-13 16:55:47	0	NONE	DATA	0	---	---	NO	NO					NO	NO	NO	YES	0			YES
SMR3571	FFQ	Food Frequency Questionnaire		TREAT	1	8	197	Treatment Group	TREAT	0	0		0	0	0	1384	225	V9	2017-10-13 16:55:47	2017-10-13 16:55:47	0	NONE	DATA	0	---	---	NO	NO					NO	NO	NO	YES	0			YES
SMR3571	FFQ	Food Frequency Questionnaire		OMEGA	1	8	198	Omega-3 Intake (randomization)	OMEGA	0	0		0	0	0	1392	225	V9	2017-10-13 16:55:47	2017-10-13 16:55:47	0	NONE	DATA	0	---	---	NO	NO					NO	NO	NO	YES	0			YES
SMR3571	FFQ	Food Frequency Questionnaire		DIABETE	1	8	199	Diabetes (randomization)	YN	0	0		0	0	0	1400	225	V9	2017-10-13 16:55:47	2017-10-13 16:55:47	0	NONE	DATA	0	---	---	NO	NO					NO	NO	NO	YES	0			YES
SMR3571	FFQ	Food Frequency Questionnaire		STATIN	1	8	200	Statins (randomization)	YN	0	0		0	0	0	1408	225	V9	2017-10-13 16:55:47	2017-10-13 16:55:47	0	NONE	DATA	0	---	---	NO	NO					NO	NO	NO	YES	0			YES
SMR3571	FFQ	Food Frequency Questionnaire		OMEGA_C	1	8	201	Omega-3 Intake (reported)	OMEGA	0	0		0	0	0	1416	225	V9	2017-10-13 16:55:47	2017-10-13 16:55:47	0	NONE	DATA	0	---	---	NO	NO					NO	NO	NO	YES	0			YES
SMR3571	FFQ	Food Frequency Questionnaire		SFFL	1	8	202	Screen Failure Flag	YN	0	0		0	0	0	1424	225	V9	2017-10-13 16:55:47	2017-10-13 16:55:47	0	NONE	DATA	0	---	---	NO	NO					NO	NO	NO	YES	0			YES
SMR3571	FFQ	Food Frequency Questionnaire		SAFETY	1	8	203	Safety Population	YN	0	0		0	0	0	1432	225	V9	2017-10-13 16:55:47	2017-10-13 16:55:47	0	NONE	DATA	0	---	---	NO	NO					NO	NO	NO	YES	0			YES
SMR3571	FFQ	Food Frequency Questionnaire		ITT	1	8	204	Intent to Treat Population	YN	0	0		0	0	0	1440	225	V9	2017-10-13 16:55:47	2017-10-13 16:55:47	0	NONE	DATA	0	---	---	NO	NO					NO	NO	NO	YES	0			YES
SMR3571	FFQ	Food Frequency Questionnaire		MITT	1	8	205	Modified Intent to Treat Population	YN	0	0		0	0	0	1448	225	V9	2017-10-13 16:55:47	2017-10-13 16:55:47	0	NONE	DATA	0	---	---	NO	NO					NO	NO	NO	YES	0			YES
SMR3571	FFQ	Food Frequency Questionnaire		PP	1	8	206	Per Protocol Population	YN	0	0		0	0	0	1456	225	V9	2017-10-13 16:55:47	2017-10-13 16:55:47	0	NONE	DATA	0	---	---	NO	NO					NO	NO	NO	YES	0			YES
SMR3571	ID	Subject Identification		SITE	2	21	1	Site		0	0		0	0	0	107	291	V9	2017-10-13 16:55:46	2017-10-13 16:55:46	0	NONE	DATA	0	---	---	NO	NO					NO	NO	NO	YES	0			YES
SMR3571	ID	Subject Identification		SUBJID	2	10	2	Subject ID		0	0		0	0	0	128	291	V9	2017-10-13 16:55:46	2017-10-13 16:55:46	0	NONE	DATA	0	---	---	NO	NO					NO	NO	NO	YES	0			YES
SMR3571	ID	Subject Identification		STATUS	2	17	3	Subject Status		0	0		0	0	0	138	291	V9	2017-10-13 16:55:46	2017-10-13 16:55:46	0	NONE	DATA	0	---	---	NO	NO					NO	NO	NO	YES	0			YES
SMR3571	ID	Subject Identification		AGE	1	3	4	Age, calculated		0	0		0	0	0	104	291	V9	2017-10-13 16:55:46	2017-10-13 16:55:46	0	NONE	DATA	0	---	---	NO	NO					NO	NO	NO	YES	0			YES
SMR3571	ID	Subject Identification		SEX	1	8	5	Sex	SEX	0	0		0	0	0	0	291	V9	2017-10-13 16:55:46	2017-10-13 16:55:46	0	NONE	DATA	0	---	---	NO	NO					NO	NO	NO	YES	0			YES
SMR3571	ID	Subject Identification		FIRSTDT	1	8	6	First Dose Date	DATE	9	0		0	0	0	8	291	V9	2017-10-13 16:55:46	2017-10-13 16:55:46	0	NONE	DATA	0	---	---	NO	NO					NO	NO	NO	YES	0			YES
SMR3571	ID	Subject Identification		RANDNO	1	8	7	Randomization Number		0	0		0	0	0	16	291	V9	2017-10-13 16:55:46	2017-10-13 16:55:46	0	NONE	DATA	0	---	---	NO	NO					NO	NO	NO	YES	0			YES
SMR3571	ID	Subject Identification		TREAT	1	8	8	Treatment Group	TREAT	0	0		0	0	0	24	291	V9	2017-10-13 16:55:46	2017-10-13 16:55:46	0	NONE	DATA	0	---	---	NO	NO					NO	NO	NO	YES	0			YES
SMR3571	ID	Subject Identification		OMEGA	1	8	9	Omega-3 Intake (randomization)	OMEGA	0	0		0	0	0	32	291	V9	2017-10-13 16:55:46	2017-10-13 16:55:46	0	NONE	DATA	0	---	---	NO	NO					NO	NO	NO	YES	0			YES
SMR3571	ID	Subject Identification		DIABETE	1	8	10	Diabetes (randomization)	YN	0	0		0	0	0	40	291	V9	2017-10-13 16:55:46	2017-10-13 16:55:46	0	NONE	DATA	0	---	---	NO	NO					NO	NO	NO	YES	0			YES
SMR3571	ID	Subject Identification		STATIN	1	8	11	Statins (randomization)	YN	0	0		0	0	0	48	291	V9	2017-10-13 16:55:46	2017-10-13 16:55:46	0	NONE	DATA	0	---	---	NO	NO					NO	NO	NO	YES	0			YES
SMR3571	ID	Subject Identification		OMEGA_C	1	8	12	Omega-3 Intake (reported)	OMEGA	0	0		0	0	0	56	291	V9	2017-10-13 16:55:46	2017-10-13 16:55:46	0	NONE	DATA	0	---	---	NO	NO					NO	NO	NO	YES	0			YES
SMR3571	ID	Subject Identification		SFFL	1	8	13	Screen Failure Flag	YN	0	0		0	0	0	64	291	V9	2017-10-13 16:55:46	2017-10-13 16:55:46	0	NONE	DATA	0	---	---	NO	NO					NO	NO	NO	YES	0			YES
SMR3571	ID	Subject Identification		SAFETY	1	8	14	Safety Population	YN	0	0		0	0	0	72	291	V9	2017-10-13 16:55:46	2017-10-13 16:55:46	0	NONE	DATA	0	---	---	NO	NO					NO	NO	NO	YES	0			YES
SMR3571	ID	Subject Identification		ITT	1	8	15	Intent to Treat Population	YN	0	0		0	0	0	80	291	V9	2017-10-13 16:55:46	2017-10-13 16:55:46	0	NONE	DATA	0	---	---	NO	NO					NO	NO	NO	YES	0			YES
SMR3571	ID	Subject Identification		MITT	1	8	16	Modified Intent to Treat Population	YN	0	0		0	0	0	88	291	V9	2017-10-13 16:55:46	2017-10-13 16:55:46	0	NONE	DATA	0	---	---	NO	NO					NO	NO	NO	YES	0			YES
SMR3571	ID	Subject Identification		PP	1	8	17	Per Protocol Population	YN	0	0		0	0	0	96	291	V9	2017-10-13 16:55:46	2017-10-13 16:55:46	0	NONE	DATA	0	---	---	NO	NO					NO	NO	NO	YES	0			YES
SMR3571	IE	Inclusion/Exclusion Criteria		E1	1	8	1	1. Diagnosis''of NASH (Non-alcoholic Ste	YN	0	0		0	0	0	0	287	V9	2017-10-13 16:55:47	2017-10-13 16:55:47	0	NONE	DATA	0	---	---	NO	NO					NO	NO	NO	YES	0			YES
SMR3571	IE	Inclusion/Exclusion Criteria		E10	1	8	2	10. Use''of systemic corticosteroids, an	YN	0	0		0	0	0	8	287	V9	2017-10-13 16:55:47	2017-10-13 16:55:47	0	NONE	DATA	0	---	---	NO	NO					NO	NO	NO	YES	0			YES
SMR3571	IE	Inclusion/Exclusion Criteria		E11	1	8	3	11. Use of the anticoagulants warfarin (	YN	0	0		0	0	0	16	287	V9	2017-10-13 16:55:47	2017-10-13 16:55:47	0	NONE	DATA	0	---	---	NO	NO					NO	NO	NO	YES	0			YES
SMR3571	IE	Inclusion/Exclusion Criteria		E12	1	8	4	12. Pregnant or lactating women or women	E12_	0	0		0	0	0	24	287	V9	2017-10-13 16:55:47	2017-10-13 16:55:47	0	NONE	DATA	0	---	---	NO	NO					NO	NO	NO	YES	0			YES
SMR3571	IE	Inclusion/Exclusion Criteria		E13	1	8	5	13. History of significant cardiovascula	YN	0	0		0	0	0	32	287	V9	2017-10-13 16:55:47	2017-10-13 16:55:47	0	NONE	DATA	0	---	---	NO	NO					NO	NO	NO	YES	0			YES
SMR3571	IE	Inclusion/Exclusion Criteria		E13VA3	1	8	6	13. History of significant cardiovascula	YN	0	0		0	0	0	40	287	V9	2017-10-13 16:55:47	2017-10-13 16:55:47	0	NONE	DATA	0	---	---	NO	NO					NO	NO	NO	YES	0			YES
SMR3571	IE	Inclusion/Exclusion Criteria		E14	1	8	7	14. History of cancer, other than non-me	YN	0	0		0	0	0	48	287	V9	2017-10-13 16:55:47	2017-10-13 16:55:47	0	NONE	DATA	0	---	---	NO	NO					NO	NO	NO	YES	0			YES
SMR3571	IE	Inclusion/Exclusion Criteria		E15	1	8	8	15. Poorly controlled or uncontrolled hy	YN	0	0		0	0	0	56	287	V9	2017-10-13 16:55:47	2017-10-13 16:55:47	0	NONE	DATA	0	---	---	NO	NO					NO	NO	NO	YES	0			YES
SMR3571	IE	Inclusion/Exclusion Criteria		E16	1	8	9	16. Recent history of prolonged alcohol	YN	0	0		0	0	0	64	287	V9	2017-10-13 16:55:47	2017-10-13 16:55:47	0	NONE	DATA	0	---	---	NO	NO					NO	NO	NO	YES	0			YES
SMR3571	IE	Inclusion/Exclusion Criteria		E17	1	8	10	17. Exposure to any investigational agen	YN	0	0		0	0	0	72	287	V9	2017-10-13 16:55:47	2017-10-13 16:55:47	0	NONE	DATA	0	---	---	NO	NO					NO	NO	NO	YES	0			YES
SMR3571	IE	Inclusion/Exclusion Criteria		E18	1	8	11	18. Subjects planning to undergo surgery	YN	0	0		0	0	0	80	287	V9	2017-10-13 16:55:47	2017-10-13 16:55:47	0	NONE	DATA	0	---	---	NO	NO					NO	NO	NO	YES	0			YES
SMR3571	IE	Inclusion/Exclusion Criteria		E19	1	8	12	19. Any serious psychiatric disease or d	YN	0	0		0	0	0	88	287	V9	2017-10-13 16:55:47	2017-10-13 16:55:47	0	NONE	DATA	0	---	---	NO	NO					NO	NO	NO	YES	0			YES
SMR3571	IE	Inclusion/Exclusion Criteria		E2	1	8	13	2. Bilirubin''>2xULN.	YN	0	0		0	0	0	96	287	V9	2017-10-13 16:55:47	2017-10-13 16:55:47	0	NONE	DATA	0	---	---	NO	NO					NO	NO	NO	YES	0			YES
SMR3571	IE	Inclusion/Exclusion Criteria		E20	1	8	14	20. Any known intolerance to the investi	YN	0	0		0	0	0	104	287	V9	2017-10-13 16:55:47	2017-10-13 16:55:47	0	NONE	DATA	0	---	---	NO	NO					NO	NO	NO	YES	0			YES
SMR3571	IE	Inclusion/Exclusion Criteria		E21	1	8	15	21. Has a condition the Investigator bel	YN	0	0		0	0	0	112	287	V9	2017-10-13 16:55:47	2017-10-13 16:55:47	0	NONE	DATA	0	---	---	NO	NO					NO	NO	NO	YES	0			YES
SMR3571	IE	Inclusion/Exclusion Criteria		E3	1	8	16	3. Other''causes of liver inflammation i	YN	0	0		0	0	0	120	287	V9	2017-10-13 16:55:47	2017-10-13 16:55:47	0	NONE	DATA	0	---	---	NO	NO					NO	NO	NO	YES	0			YES
SMR3571	IE	Inclusion/Exclusion Criteria		E4	1	8	17	4. Subjects with a history of bariatric	YN	0	0		0	0	0	128	287	V9	2017-10-13 16:55:47	2017-10-13 16:55:47	0	NONE	DATA	0	---	---	NO	NO					NO	NO	NO	YES	0			YES
SMR3571	IE	Inclusion/Exclusion Criteria		E5	1	8	18	5. Significant weight loss (> 5% body we	YN	0	0		0	0	0	136	287	V9	2017-10-13 16:55:47	2017-10-13 16:55:47	0	NONE	DATA	0	---	---	NO	NO					NO	NO	NO	YES	0			YES
SMR3571	IE	Inclusion/Exclusion Criteria		E6	1	8	19	6. Current''or recent (within six months	YN	0	0		0	0	0	144	287	V9	2017-10-13 16:55:47	2017-10-13 16:55:47	0	NONE	DATA	0	---	---	NO	NO					NO	NO	NO	YES	0			YES
SMR3571	IE	Inclusion/Exclusion Criteria		E7	1	8	20	7. Individual''taking prescription or ov	YN	0	0		0	0	0	152	287	V9	2017-10-13 16:55:47	2017-10-13 16:55:47	0	NONE	DATA	0	---	---	NO	NO					NO	NO	NO	YES	0			YES
SMR3571	IE	Inclusion/Exclusion Criteria		E8	1	8	21	8. Individuals''taking prescription ome	YN	0	0		0	0	0	160	287	V9	2017-10-13 16:55:47	2017-10-13 16:55:47	0	NONE	DATA	0	---	---	NO	NO					NO	NO	NO	YES	0			YES
SMR3571	IE	Inclusion/Exclusion Criteria		E9	1	8	22	9. Use''of supplements including omega 3	YN	0	0		0	0	0	168	287	V9	2017-10-13 16:55:47	2017-10-13 16:55:47	0	NONE	DATA	0	---	---	NO	NO					NO	NO	NO	YES	0			YES
SMR3571	IE	Inclusion/Exclusion Criteria		I1	1	8	23	1. Men''or women, ?18 years of age.	YN	0	0		0	0	0	176	287	V9	2017-10-13 16:55:47	2017-10-13 16:55:47	0	NONE	DATA	0	---	---	NO	NO					NO	NO	NO	YES	0			YES
SMR3571	IE	Inclusion/Exclusion Criteria		I1VA4	1	8	24	1. Suspected''clinical diagnosis of NAFL	YN	0	0		0	0	0	184	287	V9	2017-10-13 16:55:47	2017-10-13 16:55:47	0	NONE	DATA	0	---	---	NO	NO					NO	NO	NO	YES	0			YES
SMR3571	IE	Inclusion/Exclusion Criteria		I2	1	8	25	2. BMI between 18.0 and 39.9 kg/m2.	YN	0	0		0	0	0	192	287	V9	2017-10-13 16:55:47	2017-10-13 16:55:47	0	NONE	DATA	0	---	---	NO	NO					NO	NO	NO	YES	0			YES
SMR3571	IE	Inclusion/Exclusion Criteria		I2VA4	1	8	26	2. Men''or women, ?18 years of age.	YN	0	0		0	0	0	200	287	V9	2017-10-13 16:55:47	2017-10-13 16:55:47	0	NONE	DATA	0	---	---	NO	NO					NO	NO	NO	YES	0			YES
SMR3571	IE	Inclusion/Exclusion Criteria		I3	1	8	27	3. Non-smokers''(>3 months of non-smokin	YN	0	0		0	0	0	208	287	V9	2017-10-13 16:55:47	2017-10-13 16:55:47	0	NONE	DATA	0	---	---	NO	NO					NO	NO	NO	YES	0			YES
SMR3571	IE	Inclusion/Exclusion Criteria		I3VA4	1	8	28	3. BMI between 18.0 and 39.9 kg/m2.	YN	0	0		0	0	0	216	287	V9	2017-10-13 16:55:47	2017-10-13 16:55:47	0	NONE	DATA	0	---	---	NO	NO					NO	NO	NO	YES	0			YES
SMR3571	IE	Inclusion/Exclusion Criteria		I4	1	8	29	4. History''of persistent raised liver e	YN	0	0		0	0	0	224	287	V9	2017-10-13 16:55:47	2017-10-13 16:55:47	0	NONE	DATA	0	---	---	NO	NO					NO	NO	NO	YES	0			YES
SMR3571	IE	Inclusion/Exclusion Criteria		I4VA3	1	8	30	4. History of raised liver enzymes (ALT	YN	0	0		0	0	0	232	287	V9	2017-10-13 16:55:47	2017-10-13 16:55:47	0	NONE	DATA	0	---	---	NO	NO					NO	NO	NO	YES	0			YES
SMR3571	IE	Inclusion/Exclusion Criteria		I4VA4	1	8	31	4. Non-smokers''(>3 months of non-smokin	YN	0	0		0	0	0	240	287	V9	2017-10-13 16:55:47	2017-10-13 16:55:47	0	NONE	DATA	0	---	---	NO	NO					NO	NO	NO	YES	0			YES
SMR3571	IE	Inclusion/Exclusion Criteria		I5	1	8	32	5. If on a statin regimen, history (> 1	I5_	0	0		0	0	0	248	287	V9	2017-10-13 16:55:47	2017-10-13 16:55:47	0	NONE	DATA	0	---	---	NO	NO					NO	NO	NO	YES	0			YES
SMR3571	IE	Inclusion/Exclusion Criteria		I6	1	8	33	6. Able''to understand and cooperate wit	YN	0	0		0	0	0	256	287	V9	2017-10-13 16:55:47	2017-10-13 16:55:47	0	NONE	DATA	0	---	---	NO	NO					NO	NO	NO	YES	0			YES
SMR3571	IE	Inclusion/Exclusion Criteria		IEMETYN	1	8	34	Does the subject meet all of the Inclusi	YN	0	0		0	0	0	264	287	V9	2017-10-13 16:55:47	2017-10-13 16:55:47	0	NONE	DATA	0	---	---	NO	NO					NO	NO	NO	YES	0			YES
SMR3571	IE	Inclusion/Exclusion Criteria		IEPRVER	1	8	35	Which version of the protocol is used to	IEPRVER	0	0		0	0	0	272	287	V9	2017-10-13 16:55:47	2017-10-13 16:55:47	0	NONE	DATA	0	---	---	NO	NO					NO	NO	NO	YES	0			YES
SMR3571	IE	Inclusion/Exclusion Criteria		SUBJID	2	10	36	Subject ID		0	0		0	0	0	387	287	V9	2017-10-13 16:55:47	2017-10-13 16:55:47	0	NONE	DATA	0	---	---	NO	NO					NO	NO	NO	YES	0			YES
SMR3571	IE	Inclusion/Exclusion Criteria		SITE	2	21	37	Site		0	0		0	0	0	397	287	V9	2017-10-13 16:55:47	2017-10-13 16:55:47	0	NONE	DATA	0	---	---	NO	NO					NO	NO	NO	YES	0			YES
SMR3571	IE	Inclusion/Exclusion Criteria		STATUS	2	17	38	Subject Status		0	0		0	0	0	418	287	V9	2017-10-13 16:55:47	2017-10-13 16:55:47	0	NONE	DATA	0	---	---	NO	NO					NO	NO	NO	YES	0			YES
SMR3571	IE	Inclusion/Exclusion Criteria		AGE	1	3	39	Age, calculated		0	0		0	0	0	384	287	V9	2017-10-13 16:55:47	2017-10-13 16:55:47	0	NONE	DATA	0	---	---	NO	NO					NO	NO	NO	YES	0			YES
SMR3571	IE	Inclusion/Exclusion Criteria		SEX	1	8	40	Sex	SEX	0	0		0	0	0	280	287	V9	2017-10-13 16:55:47	2017-10-13 16:55:47	0	NONE	DATA	0	---	---	NO	NO					NO	NO	NO	YES	0			YES
SMR3571	IE	Inclusion/Exclusion Criteria		FIRSTDT	1	8	41	First Dose Date	DATE	9	0		0	0	0	288	287	V9	2017-10-13 16:55:47	2017-10-13 16:55:47	0	NONE	DATA	0	---	---	NO	NO					NO	NO	NO	YES	0			YES
SMR3571	IE	Inclusion/Exclusion Criteria		RANDNO	1	8	42	Randomization Number		0	0		0	0	0	296	287	V9	2017-10-13 16:55:47	2017-10-13 16:55:47	0	NONE	DATA	0	---	---	NO	NO					NO	NO	NO	YES	0			YES
SMR3571	IE	Inclusion/Exclusion Criteria		TREAT	1	8	43	Treatment Group	TREAT	0	0		0	0	0	304	287	V9	2017-10-13 16:55:47	2017-10-13 16:55:47	0	NONE	DATA	0	---	---	NO	NO					NO	NO	NO	YES	0			YES
SMR3571	IE	Inclusion/Exclusion Criteria		OMEGA	1	8	44	Omega-3 Intake (randomization)	OMEGA	0	0		0	0	0	312	287	V9	2017-10-13 16:55:47	2017-10-13 16:55:47	0	NONE	DATA	0	---	---	NO	NO					NO	NO	NO	YES	0			YES
SMR3571	IE	Inclusion/Exclusion Criteria		DIABETE	1	8	45	Diabetes (randomization)	YN	0	0		0	0	0	320	287	V9	2017-10-13 16:55:47	2017-10-13 16:55:47	0	NONE	DATA	0	---	---	NO	NO					NO	NO	NO	YES	0			YES
SMR3571	IE	Inclusion/Exclusion Criteria		STATIN	1	8	46	Statins (randomization)	YN	0	0		0	0	0	328	287	V9	2017-10-13 16:55:47	2017-10-13 16:55:47	0	NONE	DATA	0	---	---	NO	NO					NO	NO	NO	YES	0			YES
SMR3571	IE	Inclusion/Exclusion Criteria		OMEGA_C	1	8	47	Omega-3 Intake (reported)	OMEGA	0	0		0	0	0	336	287	V9	2017-10-13 16:55:47	2017-10-13 16:55:47	0	NONE	DATA	0	---	---	NO	NO					NO	NO	NO	YES	0			YES
SMR3571	IE	Inclusion/Exclusion Criteria		SFFL	1	8	48	Screen Failure Flag	YN	0	0		0	0	0	344	287	V9	2017-10-13 16:55:47	2017-10-13 16:55:47	0	NONE	DATA	0	---	---	NO	NO					NO	NO	NO	YES	0			YES
SMR3571	IE	Inclusion/Exclusion Criteria		SAFETY	1	8	49	Safety Population	YN	0	0		0	0	0	352	287	V9	2017-10-13 16:55:47	2017-10-13 16:55:47	0	NONE	DATA	0	---	---	NO	NO					NO	NO	NO	YES	0			YES
SMR3571	IE	Inclusion/Exclusion Criteria		ITT	1	8	50	Intent to Treat Population	YN	0	0		0	0	0	360	287	V9	2017-10-13 16:55:47	2017-10-13 16:55:47	0	NONE	DATA	0	---	---	NO	NO					NO	NO	NO	YES	0			YES
SMR3571	IE	Inclusion/Exclusion Criteria		MITT	1	8	51	Modified Intent to Treat Population	YN	0	0		0	0	0	368	287	V9	2017-10-13 16:55:47	2017-10-13 16:55:47	0	NONE	DATA	0	---	---	NO	NO					NO	NO	NO	YES	0			YES
SMR3571	IE	Inclusion/Exclusion Criteria		PP	1	8	52	Per Protocol Population	YN	0	0		0	0	0	376	287	V9	2017-10-13 16:55:47	2017-10-13 16:55:47	0	NONE	DATA	0	---	---	NO	NO					NO	NO	NO	YES	0			YES
SMR3571	LB	Laboratory Test Results		VISIT	2	17	1	Visit	$	17	0	$	17	0	0	195	16639	V9	2017-10-13 16:55:47	2017-10-13 16:55:47	0	NONE	DATA	0	---	---	NO	NO					NO	NO	NO	YES	0			YES
SMR3571	LB	Laboratory Test Results		SUBJID	2	10	2	Subject ID	$	10	0	$	10	0	0	212	16639	V9	2017-10-13 16:55:47	2017-10-13 16:55:47	0	NONE	DATA	0	---	---	NO	NO					NO	NO	NO	YES	0			YES
SMR3571	LB	Laboratory Test Results		LBDAT	1	8	3	Collection Date	DATE	9	0	DATE	11	0	0	0	16639	V9	2017-10-13 16:55:47	2017-10-13 16:55:47	0	NONE	DATA	0	---	---	NO	NO					NO	NO	NO	YES	0			YES
SMR3571	LB	Laboratory Test Results		LBTIM	1	8	4	Collection Time	TIME	5	0	TIME	20	3	0	8	16639	V9	2017-10-13 16:55:47	2017-10-13 16:55:47	0	NONE	DATA	0	---	---	NO	NO					NO	NO	NO	YES	0			YES
SMR3571	LB	Laboratory Test Results		LBTESTCD	2	8	5	Lab Test Code	$	8	0	$	8	0	0	222	16639	V9	2017-10-13 16:55:47	2017-10-13 16:55:47	0	NONE	DATA	0	---	---	NO	NO					NO	NO	NO	YES	0			YES
SMR3571	LB	Laboratory Test Results		LBTEST	2	25	6	Lab Test	$	25	0	$	25	0	0	230	16639	V9	2017-10-13 16:55:47	2017-10-13 16:55:47	0	NONE	DATA	0	---	---	NO	NO					NO	NO	NO	YES	0			YES
SMR3571	LB	Laboratory Test Results		LBCAT	2	25	7	Lab Category	$	25	0	$	25	0	0	255	16639	V9	2017-10-13 16:55:47	2017-10-13 16:55:47	0	NONE	DATA	0	---	---	NO	NO					NO	NO	NO	YES	0			YES
SMR3571	LB	Laboratory Test Results		LBORRES	2	9	8	Result (Original)	$	9	0	$	9	0	0	280	16639	V9	2017-10-13 16:55:47	2017-10-13 16:55:47	0	NONE	DATA	0	---	---	NO	NO					NO	NO	NO	YES	0			YES
SMR3571	LB	Laboratory Test Results		LBORRESU	2	6	9	Unit (Original)	$	6	0	$	6	0	0	289	16639	V9	2017-10-13 16:55:47	2017-10-13 16:55:47	0	NONE	DATA	0	---	---	NO	NO					NO	NO	NO	YES	0			YES
SMR3571	LB	Laboratory Test Results		LBORNRLO	1	8	10	Lower Limit (Original)	BEST	12	0	BEST	32	0	0	16	16639	V9	2017-10-13 16:55:47	2017-10-13 16:55:47	0	NONE	DATA	0	---	---	NO	NO					NO	NO	NO	YES	0			YES
SMR3571	LB	Laboratory Test Results		LBORNRHI	1	8	11	Upper Limit (Original)	BEST	12	0	BEST	32	0	0	24	16639	V9	2017-10-13 16:55:47	2017-10-13 16:55:47	0	NONE	DATA	0	---	---	NO	NO					NO	NO	NO	YES	0			YES
SMR3571	LB	Laboratory Test Results		LBSTRESC	2	9	12	Result (text)	$	9	0	$	9	0	0	295	16639	V9	2017-10-13 16:55:47	2017-10-13 16:55:47	0	NONE	DATA	0	---	---	NO	NO					NO	NO	NO	YES	0			YES
SMR3571	LB	Laboratory Test Results		LBSTRESN	1	8	13	Result	BEST	12	0	BEST	32	0	0	32	16639	V9	2017-10-13 16:55:47	2017-10-13 16:55:47	0	NONE	DATA	0	---	---	NO	NO					NO	NO	NO	YES	0			YES
SMR3571	LB	Laboratory Test Results		LBSTRESU	2	6	14	Unit	$	6	0	$	6	0	0	304	16639	V9	2017-10-13 16:55:47	2017-10-13 16:55:47	0	NONE	DATA	0	---	---	NO	NO					NO	NO	NO	YES	0			YES
SMR3571	LB	Laboratory Test Results		LBSTNRLO	1	8	15	Lower Limit	BEST	12	0	BEST	32	0	0	40	16639	V9	2017-10-13 16:55:47	2017-10-13 16:55:47	0	NONE	DATA	0	---	---	NO	NO					NO	NO	NO	YES	0			YES
SMR3571	LB	Laboratory Test Results		LBSTNRHI	1	8	16	Upper Limit	BEST	12	0	BEST	32	0	0	48	16639	V9	2017-10-13 16:55:47	2017-10-13 16:55:47	0	NONE	DATA	0	---	---	NO	NO					NO	NO	NO	YES	0			YES
SMR3571	LB	Laboratory Test Results		LBSTNRC	2	8	17	Reference Range for Char Results	$	8	0	$	8	0	0	310	16639	V9	2017-10-13 16:55:47	2017-10-13 16:55:47	0	NONE	DATA	0	---	---	NO	NO					NO	NO	NO	YES	0			YES
SMR3571	LB	Laboratory Test Results		LBNRIND	2	1	18	Reference Range Indicator	$LBFLAG	0	0	$	1	0	0	318	16639	V9	2017-10-13 16:55:47	2017-10-13 16:55:47	0	NONE	DATA	0	---	---	NO	NO					NO	NO	NO	YES	0			YES
SMR3571	LB	Laboratory Test Results		LBSTAT	2	1	19	Completion Status	$	1	0	$	1	0	0	319	16639	V9	2017-10-13 16:55:47	2017-10-13 16:55:47	0	NONE	DATA	0	---	---	NO	NO					NO	NO	NO	YES	0			YES
SMR3571	LB	Laboratory Test Results		LBREASND	2	1	20	Reason Test Not Done	$	1	0	$	1	0	0	320	16639	V9	2017-10-13 16:55:47	2017-10-13 16:55:47	0	NONE	DATA	0	---	---	NO	NO					NO	NO	NO	YES	0			YES
SMR3571	LB	Laboratory Test Results		LBSPCCND	2	1	21	Specimen Condition	$	1	0	$	1	0	0	321	16639	V9	2017-10-13 16:55:47	2017-10-13 16:55:47	0	NONE	DATA	0	---	---	NO	NO					NO	NO	NO	YES	0			YES
SMR3571	LB	Laboratory Test Results		LBFAST	2	1	22	Fasting Status	$	1	0	$	1	0	0	322	16639	V9	2017-10-13 16:55:47	2017-10-13 16:55:47	0	NONE	DATA	0	---	---	NO	NO					NO	NO	NO	YES	0			YES
SMR3571	LB	Laboratory Test Results		LBCOMM	2	724	23	Comments	$	724	0	$	724	0	0	323	16639	V9	2017-10-13 16:55:47	2017-10-13 16:55:47	0	NONE	DATA	0	---	---	NO	NO					NO	NO	NO	YES	0			YES
SMR3571	LB	Laboratory Test Results		VISITNUM	1	8	24	Visit	VISIT	0	0		0	0	0	56	16639	V9	2017-10-13 16:55:47	2017-10-13 16:55:47	0	NONE	DATA	0	---	---	NO	NO					NO	NO	NO	YES	0			YES
SMR3571	LB	Laboratory Test Results		CS_COMM	2	134	25	Comments		0	0		0	0	0	1047	16639	V9	2017-10-13 16:55:47	2017-10-13 16:55:47	0	NONE	DATA	0	---	---	NO	NO					NO	NO	NO	YES	0			YES
SMR3571	LB	Laboratory Test Results		CS_SIG	1	8	26	Were any 'out of range' lab values clini	CS_SIG	0	0		0	0	0	64	16639	V9	2017-10-13 16:55:47	2017-10-13 16:55:47	0	NONE	DATA	0	---	---	NO	NO					NO	NO	NO	YES	0			YES
SMR3571	LB	Laboratory Test Results		B_LBRESN	1	8	27	Baseline Result		0	0		0	0	0	72	16639	V9	2017-10-13 16:55:47	2017-10-13 16:55:47	0	NONE	DATA	0	---	---	NO	NO					NO	NO	NO	YES	0			YES
SMR3571	LB	Laboratory Test Results		B_LBFLAG	2	1	28	Baseline Result Flag	$LBFLAG	0	0		0	0	0	1181	16639	V9	2017-10-13 16:55:47	2017-10-13 16:55:47	0	NONE	DATA	0	---	---	NO	NO					NO	NO	NO	YES	0			YES
SMR3571	LB	Laboratory Test Results		D_LBRESN	1	8	29	Change from Baseline		0	0		0	0	0	80	16639	V9	2017-10-13 16:55:47	2017-10-13 16:55:47	0	NONE	DATA	0	---	---	NO	NO					NO	NO	NO	YES	0			YES
SMR3571	LB	Laboratory Test Results		SITE	2	21	30	Site		0	0		0	0	0	1182	16639	V9	2017-10-13 16:55:47	2017-10-13 16:55:47	0	NONE	DATA	0	---	---	NO	NO					NO	NO	NO	YES	0			YES
SMR3571	LB	Laboratory Test Results		STATUS	2	17	31	Subject Status		0	0		0	0	0	1203	16639	V9	2017-10-13 16:55:47	2017-10-13 16:55:47	0	NONE	DATA	0	---	---	NO	NO					NO	NO	NO	YES	0			YES
SMR3571	LB	Laboratory Test Results		AGE	1	3	32	Age, calculated		0	0		0	0	0	192	16639	V9	2017-10-13 16:55:47	2017-10-13 16:55:47	0	NONE	DATA	0	---	---	NO	NO					NO	NO	NO	YES	0			YES
SMR3571	LB	Laboratory Test Results		SEX	1	8	33	Sex	SEX	0	0		0	0	0	88	16639	V9	2017-10-13 16:55:47	2017-10-13 16:55:47	0	NONE	DATA	0	---	---	NO	NO					NO	NO	NO	YES	0			YES
SMR3571	LB	Laboratory Test Results		FIRSTDT	1	8	34	First Dose Date	DATE	9	0		0	0	0	96	16639	V9	2017-10-13 16:55:47	2017-10-13 16:55:47	0	NONE	DATA	0	---	---	NO	NO					NO	NO	NO	YES	0			YES
SMR3571	LB	Laboratory Test Results		RANDNO	1	8	35	Randomization Number		0	0		0	0	0	104	16639	V9	2017-10-13 16:55:47	2017-10-13 16:55:47	0	NONE	DATA	0	---	---	NO	NO					NO	NO	NO	YES	0			YES
SMR3571	LB	Laboratory Test Results		TREAT	1	8	36	Treatment Group	TREAT	0	0		0	0	0	112	16639	V9	2017-10-13 16:55:47	2017-10-13 16:55:47	0	NONE	DATA	0	---	---	NO	NO					NO	NO	NO	YES	0			YES
SMR3571	LB	Laboratory Test Results		OMEGA	1	8	37	Omega-3 Intake (randomization)	OMEGA	0	0		0	0	0	120	16639	V9	2017-10-13 16:55:47	2017-10-13 16:55:47	0	NONE	DATA	0	---	---	NO	NO					NO	NO	NO	YES	0			YES
SMR3571	LB	Laboratory Test Results		DIABETE	1	8	38	Diabetes (randomization)	YN	0	0		0	0	0	128	16639	V9	2017-10-13 16:55:47	2017-10-13 16:55:47	0	NONE	DATA	0	---	---	NO	NO					NO	NO	NO	YES	0			YES
SMR3571	LB	Laboratory Test Results		STATIN	1	8	39	Statins (randomization)	YN	0	0		0	0	0	136	16639	V9	2017-10-13 16:55:47	2017-10-13 16:55:47	0	NONE	DATA	0	---	---	NO	NO					NO	NO	NO	YES	0			YES
SMR3571	LB	Laboratory Test Results		OMEGA_C	1	8	40	Omega-3 Intake (reported)	OMEGA	0	0		0	0	0	144	16639	V9	2017-10-13 16:55:47	2017-10-13 16:55:47	0	NONE	DATA	0	---	---	NO	NO					NO	NO	NO	YES	0			YES
SMR3571	LB	Laboratory Test Results		SFFL	1	8	41	Screen Failure Flag	YN	0	0		0	0	0	152	16639	V9	2017-10-13 16:55:47	2017-10-13 16:55:47	0	NONE	DATA	0	---	---	NO	NO					NO	NO	NO	YES	0			YES
SMR3571	LB	Laboratory Test Results		SAFETY	1	8	42	Safety Population	YN	0	0		0	0	0	160	16639	V9	2017-10-13 16:55:47	2017-10-13 16:55:47	0	NONE	DATA	0	---	---	NO	NO					NO	NO	NO	YES	0			YES
SMR3571	LB	Laboratory Test Results		ITT	1	8	43	Intent to Treat Population	YN	0	0		0	0	0	168	16639	V9	2017-10-13 16:55:47	2017-10-13 16:55:47	0	NONE	DATA	0	---	---	NO	NO					NO	NO	NO	YES	0			YES
SMR3571	LB	Laboratory Test Results		MITT	1	8	44	Modified Intent to Treat Population	YN	0	0		0	0	0	176	16639	V9	2017-10-13 16:55:47	2017-10-13 16:55:47	0	NONE	DATA	0	---	---	NO	NO					NO	NO	NO	YES	0			YES
SMR3571	LB	Laboratory Test Results		PP	1	8	45	Per Protocol Population	YN	0	0		0	0	0	184	16639	V9	2017-10-13 16:55:47	2017-10-13 16:55:47	0	NONE	DATA	0	---	---	NO	NO					NO	NO	NO	YES	0			YES
SMR3571	MH	Medical History		VISIT	2	7	1	Visit		0	0		0	0	0	222	2788	V9	2017-10-13 16:55:46	2017-10-13 16:55:46	0	NONE	DATA	0	---	---	NO	NO					NO	NO	NO	YES	0			YES
SMR3571	MH	Medical History		MHSPID	1	3	2	Row Number		0	0		0	0	0	216	2788	V9	2017-10-13 16:55:46	2017-10-13 16:55:46	0	NONE	DATA	0	---	---	NO	NO					NO	NO	NO	YES	0			YES
SMR3571	MH	Medical History		MHTERM	2	91	3	Reported Term (condition/symptom)		0	0		0	0	0	229	2788	V9	2017-10-13 16:55:46	2017-10-13 16:55:46	0	NONE	DATA	0	---	---	NO	NO					NO	NO	NO	YES	0			YES
SMR3571	MH	Medical History		CATEGORY	1	8	4	Body System	CATEGORY	0	0		0	0	0	0	2788	V9	2017-10-13 16:55:46	2017-10-13 16:55:46	0	NONE	DATA	0	---	---	NO	NO					NO	NO	NO	YES	0			YES
SMR3571	MH	Medical History		CONTROL	1	8	5	Disease controlled	DISEASE_CONTROLLED	0	0		0	0	0	8	2788	V9	2017-10-13 16:55:46	2017-10-13 16:55:46	0	NONE	DATA	0	---	---	NO	NO					NO	NO	NO	YES	0			YES
SMR3571	MH	Medical History		MHONGO	1	8	6	Ongoing?	YN	0	0		0	0	0	16	2788	V9	2017-10-13 16:55:46	2017-10-13 16:55:46	0	NONE	DATA	0	---	---	NO	NO					NO	NO	NO	YES	0			YES
SMR3571	MH	Medical History		SUBJID	2	10	7	Subject ID		0	0		0	0	0	320	2788	V9	2017-10-13 16:55:46	2017-10-13 16:55:46	0	NONE	DATA	0	---	---	NO	NO					NO	NO	NO	YES	0			YES
SMR3571	MH	Medical History		MHSTDT	1	8	8	Onset Date	DATE	9	0		0	0	0	24	2788	V9	2017-10-13 16:55:46	2017-10-13 16:55:46	0	NONE	DATA	0	---	---	NO	NO					NO	NO	NO	YES	0			YES
SMR3571	MH	Medical History		CDMHST	2	9	9	Onset Date (Char)		0	0		0	0	0	330	2788	V9	2017-10-13 16:55:46	2017-10-13 16:55:46	0	NONE	DATA	0	---	---	NO	NO					NO	NO	NO	YES	0			YES
SMR3571	MH	Medical History		MHENDT	1	8	10	End Date	DATE	9	0		0	0	0	32	2788	V9	2017-10-13 16:55:46	2017-10-13 16:55:46	0	NONE	DATA	0	---	---	NO	NO					NO	NO	NO	YES	0			YES
SMR3571	MH	Medical History		CDMHEN	2	9	11	End Date (Char)		0	0		0	0	0	339	2788	V9	2017-10-13 16:55:46	2017-10-13 16:55:46	0	NONE	DATA	0	---	---	NO	NO					NO	NO	NO	YES	0			YES
SMR3571	MH	Medical History		NAFLDOTH	2	15	12	Specify other method of NAFLD diagnosis:		0	0		0	0	0	348	2788	V9	2017-10-13 16:55:46	2017-10-13 16:55:46	0	NONE	DATA	0	---	---	NO	NO					NO	NO	NO	YES	0			YES
SMR3571	MH	Medical History		MHT2DYN	1	8	13	Does the subject have type II diabetes?	YN	0	0		0	0	0	40	2788	V9	2017-10-13 16:55:46	2017-10-13 16:55:46	0	NONE	DATA	0	---	---	NO	NO					NO	NO	NO	YES	0			YES
SMR3571	MH	Medical History		MHUPDATE	1	8	14	Has the subject experienced any comorbid	YN	0	0		0	0	0	48	2788	V9	2017-10-13 16:55:46	2017-10-13 16:55:46	0	NONE	DATA	0	---	---	NO	NO					NO	NO	NO	YES	0			YES
SMR3571	MH	Medical History		MHYN	1	8	15	Has the subject experienced any past or	YN	0	0		0	0	0	56	2788	V9	2017-10-13 16:55:46	2017-10-13 16:55:46	0	NONE	DATA	0	---	---	NO	NO					NO	NO	NO	YES	0			YES
SMR3571	MH	Medical History		NAFLDYN	1	8	16	Was there a confirmed diagnosis of NAFLD	YN	0	0		0	0	0	64	2788	V9	2017-10-13 16:55:46	2017-10-13 16:55:46	0	NONE	DATA	0	---	---	NO	NO					NO	NO	NO	YES	0			YES
SMR3571	MH	Medical History		ULTRARES	1	8	17	Result of Ultrasound (NAFLD confirmed)?	YN	0	0		0	0	0	72	2788	V9	2017-10-13 16:55:46	2017-10-13 16:55:46	0	NONE	DATA	0	---	---	NO	NO					NO	NO	NO	YES	0			YES
SMR3571	MH	Medical History		NAFLDM	1	8	18	Method of NAFLD diagnosis:	NAFLDMETH	0	0		0	0	0	80	2788	V9	2017-10-13 16:55:46	2017-10-13 16:55:46	0	NONE	DATA	0	---	---	NO	NO					NO	NO	NO	YES	0			YES
SMR3571	MH	Medical History		NASHYN	1	8	19	Was there a diagnosis of NASH?	YN	0	0		0	0	0	88	2788	V9	2017-10-13 16:55:46	2017-10-13 16:55:46	0	NONE	DATA	0	---	---	NO	NO					NO	NO	NO	YES	0			YES
SMR3571	MH	Medical History		NAFLDDT	1	8	20	Date of NAFLD diagnosis	DATE	9	0		0	0	0	96	2788	V9	2017-10-13 16:55:46	2017-10-13 16:55:46	0	NONE	DATA	0	---	---	NO	NO					NO	NO	NO	YES	0			YES
SMR3571	MH	Medical History		CDNAFLD	2	9	21	Date of NAFLD diagnosis (Char)		0	0		0	0	0	363	2788	V9	2017-10-13 16:55:46	2017-10-13 16:55:46	0	NONE	DATA	0	---	---	NO	NO					NO	NO	NO	YES	0			YES
SMR3571	MH	Medical History		ULTRADT	1	8	22	Date of Ultrasound	DATE	9	0		0	0	0	104	2788	V9	2017-10-13 16:55:46	2017-10-13 16:55:46	0	NONE	DATA	0	---	---	NO	NO					NO	NO	NO	YES	0			YES
SMR3571	MH	Medical History		CDULTRA	2	9	23	Date of Ultrasound (Char)		0	0		0	0	0	372	2788	V9	2017-10-13 16:55:46	2017-10-13 16:55:46	0	NONE	DATA	0	---	---	NO	NO					NO	NO	NO	YES	0			YES
SMR3571	MH	Medical History		SITE	2	21	24	Site		0	0		0	0	0	381	2788	V9	2017-10-13 16:55:46	2017-10-13 16:55:46	0	NONE	DATA	0	---	---	NO	NO					NO	NO	NO	YES	0			YES
SMR3571	MH	Medical History		STATUS	2	17	25	Subject Status		0	0		0	0	0	402	2788	V9	2017-10-13 16:55:46	2017-10-13 16:55:46	0	NONE	DATA	0	---	---	NO	NO					NO	NO	NO	YES	0			YES
SMR3571	MH	Medical History		AGE	1	3	26	Age, calculated		0	0		0	0	0	219	2788	V9	2017-10-13 16:55:46	2017-10-13 16:55:46	0	NONE	DATA	0	---	---	NO	NO					NO	NO	NO	YES	0			YES
SMR3571	MH	Medical History		SEX	1	8	27	Sex	SEX	0	0		0	0	0	112	2788	V9	2017-10-13 16:55:46	2017-10-13 16:55:46	0	NONE	DATA	0	---	---	NO	NO					NO	NO	NO	YES	0			YES
SMR3571	MH	Medical History		FIRSTDT	1	8	28	First Dose Date	DATE	9	0		0	0	0	120	2788	V9	2017-10-13 16:55:46	2017-10-13 16:55:46	0	NONE	DATA	0	---	---	NO	NO					NO	NO	NO	YES	0			YES
SMR3571	MH	Medical History		RANDNO	1	8	29	Randomization Number		0	0		0	0	0	128	2788	V9	2017-10-13 16:55:46	2017-10-13 16:55:46	0	NONE	DATA	0	---	---	NO	NO					NO	NO	NO	YES	0			YES
SMR3571	MH	Medical History		TREAT	1	8	30	Treatment Group	TREAT	0	0		0	0	0	136	2788	V9	2017-10-13 16:55:46	2017-10-13 16:55:46	0	NONE	DATA	0	---	---	NO	NO					NO	NO	NO	YES	0			YES
SMR3571	MH	Medical History		OMEGA	1	8	31	Omega-3 Intake (randomization)	OMEGA	0	0		0	0	0	144	2788	V9	2017-10-13 16:55:46	2017-10-13 16:55:46	0	NONE	DATA	0	---	---	NO	NO					NO	NO	NO	YES	0			YES
SMR3571	MH	Medical History		DIABETE	1	8	32	Diabetes (randomization)	YN	0	0		0	0	0	152	2788	V9	2017-10-13 16:55:46	2017-10-13 16:55:46	0	NONE	DATA	0	---	---	NO	NO					NO	NO	NO	YES	0			YES
SMR3571	MH	Medical History		STATIN	1	8	33	Statins (randomization)	YN	0	0		0	0	0	160	2788	V9	2017-10-13 16:55:46	2017-10-13 16:55:46	0	NONE	DATA	0	---	---	NO	NO					NO	NO	NO	YES	0			YES
SMR3571	MH	Medical History		OMEGA_C	1	8	34	Omega-3 Intake (reported)	OMEGA	0	0		0	0	0	168	2788	V9	2017-10-13 16:55:46	2017-10-13 16:55:46	0	NONE	DATA	0	---	---	NO	NO					NO	NO	NO	YES	0			YES
SMR3571	MH	Medical History		SFFL	1	8	35	Screen Failure Flag	YN	0	0		0	0	0	176	2788	V9	2017-10-13 16:55:46	2017-10-13 16:55:46	0	NONE	DATA	0	---	---	NO	NO					NO	NO	NO	YES	0			YES
SMR3571	MH	Medical History		SAFETY	1	8	36	Safety Population	YN	0	0		0	0	0	184	2788	V9	2017-10-13 16:55:46	2017-10-13 16:55:46	0	NONE	DATA	0	---	---	NO	NO					NO	NO	NO	YES	0			YES
SMR3571	MH	Medical History		ITT	1	8	37	Intent to Treat Population	YN	0	0		0	0	0	192	2788	V9	2017-10-13 16:55:46	2017-10-13 16:55:46	0	NONE	DATA	0	---	---	NO	NO					NO	NO	NO	YES	0			YES
SMR3571	MH	Medical History		MITT	1	8	38	Modified Intent to Treat Population	YN	0	0		0	0	0	200	2788	V9	2017-10-13 16:55:46	2017-10-13 16:55:46	0	NONE	DATA	0	---	---	NO	NO					NO	NO	NO	YES	0			YES
SMR3571	MH	Medical History		PP	1	8	39	Per Protocol Population	YN	0	0		0	0	0	208	2788	V9	2017-10-13 16:55:46	2017-10-13 16:55:46	0	NONE	DATA	0	---	---	NO	NO					NO	NO	NO	YES	0			YES
SMR3571	MRI	MRI Information		VISIT	2	7	1	Visit		0	0		0	0	0	203	278	V9	2017-10-13 16:55:47	2017-10-13 16:55:47	0	NONE	DATA	0	---	---	NO	NO					NO	NO	NO	YES	0			YES
SMR3571	MRI	MRI Information		MRI_PROT	1	8	2	MRI acquisition protocol	MRI_PROT	0	0		0	0	0	0	278	V9	2017-10-13 16:55:47	2017-10-13 16:55:47	0	NONE	DATA	0	---	---	NO	NO					NO	NO	NO	YES	0			YES
SMR3571	MRI	MRI Information		MRI_REAS	1	8	3	If No, reason	MRI_REAS	0	0		0	0	0	8	278	V9	2017-10-13 16:55:47	2017-10-13 16:55:47	0	NONE	DATA	0	---	---	NO	NO					NO	NO	NO	YES	0			YES
SMR3571	MRI	MRI Information		MRI_YN	1	8	4	Was an MRI performed?	YN	0	0		0	0	0	16	278	V9	2017-10-13 16:55:47	2017-10-13 16:55:47	0	NONE	DATA	0	---	---	NO	NO					NO	NO	NO	YES	0			YES
SMR3571	MRI	MRI Information		SUBJID	2	10	5	Subject ID	$	10	0	$	10	0	0	210	278	V9	2017-10-13 16:55:47	2017-10-13 16:55:47	0	NONE	DATA	0	---	---	NO	NO					NO	NO	NO	YES	0			YES
SMR3571	MRI	MRI Information		MRIDT	1	8	6	Date of MRI	DATE	9	0		0	0	0	24	278	V9	2017-10-13 16:55:47	2017-10-13 16:55:47	0	NONE	DATA	0	---	---	NO	NO					NO	NO	NO	YES	0			YES
SMR3571	MRI	MRI Information		CDMRI	2	9	7	Date of MRI		0	0		0	0	0	220	278	V9	2017-10-13 16:55:47	2017-10-13 16:55:47	0	NONE	DATA	0	---	---	NO	NO					NO	NO	NO	YES	0			YES
SMR3571	MRI	MRI Information		MRISHDT	1	8	8	Date of transmission to VirtualScopics	DATE	9	0		0	0	0	32	278	V9	2017-10-13 16:55:47	2017-10-13 16:55:47	0	NONE	DATA	0	---	---	NO	NO					NO	NO	NO	YES	0			YES
SMR3571	MRI	MRI Information		CDMRISH	2	9	9	Date of transmission to VirtualScopics		0	0		0	0	0	229	278	V9	2017-10-13 16:55:47	2017-10-13 16:55:47	0	NONE	DATA	0	---	---	NO	NO					NO	NO	NO	YES	0			YES
SMR3571	MRI	MRI Information		VISITNUM	1	8	10	Visit	VISIT	0	0		0	0	0	40	278	V9	2017-10-13 16:55:47	2017-10-13 16:55:47	0	NONE	DATA	0	---	---	NO	NO					NO	NO	NO	YES	0			YES
SMR3571	MRI	MRI Information		COM1A	2	200	11	Comment		0	0		0	0	0	238	278	V9	2017-10-13 16:55:47	2017-10-13 16:55:47	0	NONE	DATA	0	---	---	NO	NO					NO	NO	NO	YES	0			YES
SMR3571	MRI	MRI Information		HFF	1	8	12	Hepatic Fat Fraction (HFF)		0	0		0	0	0	48	278	V9	2017-10-13 16:55:47	2017-10-13 16:55:47	0	NONE	DATA	0	---	---	NO	NO					NO	NO	NO	YES	0			YES
SMR3571	MRI	MRI Information		FLI	1	8	13	Fatty Liver Index (FLI)		0	0		0	0	0	56	278	V9	2017-10-13 16:55:47	2017-10-13 16:55:47	0	NONE	DATA	0	---	---	NO	NO					NO	NO	NO	YES	0			YES
SMR3571	MRI	MRI Information		B_HFF	1	8	14	Baselibe Hepatic Fat Fraction (HFF)		0	0		0	0	0	64	278	V9	2017-10-13 16:55:47	2017-10-13 16:55:47	0	NONE	DATA	0	---	---	NO	NO					NO	NO	NO	YES	0			YES
SMR3571	MRI	MRI Information		B_FLI	1	8	15	Baselibe Fatty Liver Index (FLI)		0	0		0	0	0	72	278	V9	2017-10-13 16:55:47	2017-10-13 16:55:47	0	NONE	DATA	0	---	---	NO	NO					NO	NO	NO	YES	0			YES
SMR3571	MRI	MRI Information		D_HFF	1	8	16	HFF Change from Baseline		0	0		0	0	0	80	278	V9	2017-10-13 16:55:47	2017-10-13 16:55:47	0	NONE	DATA	0	---	---	NO	NO					NO	NO	NO	YES	0			YES
SMR3571	MRI	MRI Information		D_FLI	1	8	17	FLI Change from Baseline		0	0		0	0	0	88	278	V9	2017-10-13 16:55:47	2017-10-13 16:55:47	0	NONE	DATA	0	---	---	NO	NO					NO	NO	NO	YES	0			YES
SMR3571	MRI	MRI Information		SITE	2	21	18	Site		0	0		0	0	0	438	278	V9	2017-10-13 16:55:47	2017-10-13 16:55:47	0	NONE	DATA	0	---	---	NO	NO					NO	NO	NO	YES	0			YES
SMR3571	MRI	MRI Information		STATUS	2	17	19	Subject Status		0	0		0	0	0	459	278	V9	2017-10-13 16:55:47	2017-10-13 16:55:47	0	NONE	DATA	0	---	---	NO	NO					NO	NO	NO	YES	0			YES
SMR3571	MRI	MRI Information		AGE	1	3	20	Age, calculated		0	0		0	0	0	200	278	V9	2017-10-13 16:55:47	2017-10-13 16:55:47	0	NONE	DATA	0	---	---	NO	NO					NO	NO	NO	YES	0			YES
SMR3571	MRI	MRI Information		SEX	1	8	21	Sex	SEX	0	0		0	0	0	96	278	V9	2017-10-13 16:55:47	2017-10-13 16:55:47	0	NONE	DATA	0	---	---	NO	NO					NO	NO	NO	YES	0			YES
SMR3571	MRI	MRI Information		FIRSTDT	1	8	22	First Dose Date	DATE	9	0		0	0	0	104	278	V9	2017-10-13 16:55:47	2017-10-13 16:55:47	0	NONE	DATA	0	---	---	NO	NO					NO	NO	NO	YES	0			YES
SMR3571	MRI	MRI Information		RANDNO	1	8	23	Randomization Number		0	0		0	0	0	112	278	V9	2017-10-13 16:55:47	2017-10-13 16:55:47	0	NONE	DATA	0	---	---	NO	NO					NO	NO	NO	YES	0			YES
SMR3571	MRI	MRI Information		TREAT	1	8	24	Treatment Group	TREAT	0	0		0	0	0	120	278	V9	2017-10-13 16:55:47	2017-10-13 16:55:47	0	NONE	DATA	0	---	---	NO	NO					NO	NO	NO	YES	0			YES
SMR3571	MRI	MRI Information		OMEGA	1	8	25	Omega-3 Intake (randomization)	OMEGA	0	0		0	0	0	128	278	V9	2017-10-13 16:55:47	2017-10-13 16:55:47	0	NONE	DATA	0	---	---	NO	NO					NO	NO	NO	YES	0			YES
SMR3571	MRI	MRI Information		DIABETE	1	8	26	Diabetes (randomization)	YN	0	0		0	0	0	136	278	V9	2017-10-13 16:55:47	2017-10-13 16:55:47	0	NONE	DATA	0	---	---	NO	NO					NO	NO	NO	YES	0			YES
SMR3571	MRI	MRI Information		STATIN	1	8	27	Statins (randomization)	YN	0	0		0	0	0	144	278	V9	2017-10-13 16:55:47	2017-10-13 16:55:47	0	NONE	DATA	0	---	---	NO	NO					NO	NO	NO	YES	0			YES
SMR3571	MRI	MRI Information		OMEGA_C	1	8	28	Omega-3 Intake (reported)	OMEGA	0	0		0	0	0	152	278	V9	2017-10-13 16:55:47	2017-10-13 16:55:47	0	NONE	DATA	0	---	---	NO	NO					NO	NO	NO	YES	0			YES
SMR3571	MRI	MRI Information		SFFL	1	8	29	Screen Failure Flag	YN	0	0		0	0	0	160	278	V9	2017-10-13 16:55:47	2017-10-13 16:55:47	0	NONE	DATA	0	---	---	NO	NO					NO	NO	NO	YES	0			YES
SMR3571	MRI	MRI Information		SAFETY	1	8	30	Safety Population	YN	0	0		0	0	0	168	278	V9	2017-10-13 16:55:47	2017-10-13 16:55:47	0	NONE	DATA	0	---	---	NO	NO					NO	NO	NO	YES	0			YES
SMR3571	MRI	MRI Information		ITT	1	8	31	Intent to Treat Population	YN	0	0		0	0	0	176	278	V9	2017-10-13 16:55:47	2017-10-13 16:55:47	0	NONE	DATA	0	---	---	NO	NO					NO	NO	NO	YES	0			YES
SMR3571	MRI	MRI Information		MITT	1	8	32	Modified Intent to Treat Population	YN	0	0		0	0	0	184	278	V9	2017-10-13 16:55:47	2017-10-13 16:55:47	0	NONE	DATA	0	---	---	NO	NO					NO	NO	NO	YES	0			YES
SMR3571	MRI	MRI Information		PP	1	8	33	Per Protocol Population	YN	0	0		0	0	0	192	278	V9	2017-10-13 16:55:47	2017-10-13 16:55:47	0	NONE	DATA	0	---	---	NO	NO					NO	NO	NO	YES	0			YES
SMR3571	PE	Physical Examination		VISIT	2	7	1	Visit		0	0		0	0	0	147	2478	V9	2017-10-13 16:55:47	2017-10-13 16:55:47	0	NONE	DATA	0	---	---	NO	NO					NO	NO	NO	YES	0			YES
SMR3571	PE	Physical Examination		PETESTOT	2	4	2	Specify other		0	0		0	0	0	154	2478	V9	2017-10-13 16:55:47	2017-10-13 16:55:47	0	NONE	DATA	0	---	---	NO	NO					NO	NO	NO	YES	0			YES
SMR3571	PE	Physical Examination		PERESAB	2	88	3	If abnormal, specify		0	0		0	0	0	158	2478	V9	2017-10-13 16:55:47	2017-10-13 16:55:47	0	NONE	DATA	0	---	---	NO	NO					NO	NO	NO	YES	0			YES
SMR3571	PE	Physical Examination		PERES	1	8	4	Results	PERES	0	0		0	0	0	0	2478	V9	2017-10-13 16:55:47	2017-10-13 16:55:47	0	NONE	DATA	0	---	---	NO	NO					NO	NO	NO	YES	0			YES
SMR3571	PE	Physical Examination		PETEST	1	8	5	Body system	PETEST	0	0		0	0	0	8	2478	V9	2017-10-13 16:55:47	2017-10-13 16:55:47	0	NONE	DATA	0	---	---	NO	NO					NO	NO	NO	YES	0			YES
SMR3571	PE	Physical Examination		SUBJID	2	10	6	Subject ID		0	0		0	0	0	246	2478	V9	2017-10-13 16:55:47	2017-10-13 16:55:47	0	NONE	DATA	0	---	---	NO	NO					NO	NO	NO	YES	0			YES
SMR3571	PE	Physical Examination		VISITNUM	1	8	7	Visit Number		0	0		0	0	0	16	2478	V9	2017-10-13 16:55:47	2017-10-13 16:55:47	0	NONE	DATA	0	---	---	NO	NO					NO	NO	NO	YES	0			YES
SMR3571	PE	Physical Examination		PEYN	1	8	8	Was the physical examination performed a	YN	0	0		0	0	0	24	2478	V9	2017-10-13 16:55:47	2017-10-13 16:55:47	0	NONE	DATA	0	---	---	NO	NO					NO	NO	NO	YES	0			YES
SMR3571	PE	Physical Examination		PEDT	1	8	9	Date of Physical Exam	DATE	9	0		0	0	0	32	2478	V9	2017-10-13 16:55:47	2017-10-13 16:55:47	0	NONE	DATA	0	---	---	NO	NO					NO	NO	NO	YES	0			YES
SMR3571	PE	Physical Examination		CDPE	2	9	10	Date of Physical Exam (Char)		0	0		0	0	0	256	2478	V9	2017-10-13 16:55:47	2017-10-13 16:55:47	0	NONE	DATA	0	---	---	NO	NO					NO	NO	NO	YES	0			YES
SMR3571	PE	Physical Examination		SITE	2	21	11	Site		0	0		0	0	0	265	2478	V9	2017-10-13 16:55:47	2017-10-13 16:55:47	0	NONE	DATA	0	---	---	NO	NO					NO	NO	NO	YES	0			YES
SMR3571	PE	Physical Examination		STATUS	2	17	12	Subject Status		0	0		0	0	0	286	2478	V9	2017-10-13 16:55:47	2017-10-13 16:55:47	0	NONE	DATA	0	---	---	NO	NO					NO	NO	NO	YES	0			YES
SMR3571	PE	Physical Examination		AGE	1	3	13	Age, calculated		0	0		0	0	0	144	2478	V9	2017-10-13 16:55:47	2017-10-13 16:55:47	0	NONE	DATA	0	---	---	NO	NO					NO	NO	NO	YES	0			YES
SMR3571	PE	Physical Examination		SEX	1	8	14	Sex	SEX	0	0		0	0	0	40	2478	V9	2017-10-13 16:55:47	2017-10-13 16:55:47	0	NONE	DATA	0	---	---	NO	NO					NO	NO	NO	YES	0			YES
SMR3571	PE	Physical Examination		FIRSTDT	1	8	15	First Dose Date	DATE	9	0		0	0	0	48	2478	V9	2017-10-13 16:55:47	2017-10-13 16:55:47	0	NONE	DATA	0	---	---	NO	NO					NO	NO	NO	YES	0			YES
SMR3571	PE	Physical Examination		RANDNO	1	8	16	Randomization Number		0	0		0	0	0	56	2478	V9	2017-10-13 16:55:47	2017-10-13 16:55:47	0	NONE	DATA	0	---	---	NO	NO					NO	NO	NO	YES	0			YES
SMR3571	PE	Physical Examination		TREAT	1	8	17	Treatment Group	TREAT	0	0		0	0	0	64	2478	V9	2017-10-13 16:55:47	2017-10-13 16:55:47	0	NONE	DATA	0	---	---	NO	NO					NO	NO	NO	YES	0			YES
SMR3571	PE	Physical Examination		OMEGA	1	8	18	Omega-3 Intake (randomization)	OMEGA	0	0		0	0	0	72	2478	V9	2017-10-13 16:55:47	2017-10-13 16:55:47	0	NONE	DATA	0	---	---	NO	NO					NO	NO	NO	YES	0			YES
SMR3571	PE	Physical Examination		DIABETE	1	8	19	Diabetes (randomization)	YN	0	0		0	0	0	80	2478	V9	2017-10-13 16:55:47	2017-10-13 16:55:47	0	NONE	DATA	0	---	---	NO	NO					NO	NO	NO	YES	0			YES
SMR3571	PE	Physical Examination		STATIN	1	8	20	Statins (randomization)	YN	0	0		0	0	0	88	2478	V9	2017-10-13 16:55:47	2017-10-13 16:55:47	0	NONE	DATA	0	---	---	NO	NO					NO	NO	NO	YES	0			YES
SMR3571	PE	Physical Examination		OMEGA_C	1	8	21	Omega-3 Intake (reported)	OMEGA	0	0		0	0	0	96	2478	V9	2017-10-13 16:55:47	2017-10-13 16:55:47	0	NONE	DATA	0	---	---	NO	NO					NO	NO	NO	YES	0			YES
SMR3571	PE	Physical Examination		SFFL	1	8	22	Screen Failure Flag	YN	0	0		0	0	0	104	2478	V9	2017-10-13 16:55:47	2017-10-13 16:55:47	0	NONE	DATA	0	---	---	NO	NO					NO	NO	NO	YES	0			YES
SMR3571	PE	Physical Examination		SAFETY	1	8	23	Safety Population	YN	0	0		0	0	0	112	2478	V9	2017-10-13 16:55:47	2017-10-13 16:55:47	0	NONE	DATA	0	---	---	NO	NO					NO	NO	NO	YES	0			YES
SMR3571	PE	Physical Examination		ITT	1	8	24	Intent to Treat Population	YN	0	0		0	0	0	120	2478	V9	2017-10-13 16:55:47	2017-10-13 16:55:47	0	NONE	DATA	0	---	---	NO	NO					NO	NO	NO	YES	0			YES
SMR3571	PE	Physical Examination		MITT	1	8	25	Modified Intent to Treat Population	YN	0	0		0	0	0	128	2478	V9	2017-10-13 16:55:47	2017-10-13 16:55:47	0	NONE	DATA	0	---	---	NO	NO					NO	NO	NO	YES	0			YES
SMR3571	PE	Physical Examination		PP	1	8	26	Per Protocol Population	YN	0	0		0	0	0	136	2478	V9	2017-10-13 16:55:47	2017-10-13 16:55:47	0	NONE	DATA	0	---	---	NO	NO					NO	NO	NO	YES	0			YES
SMR3571	PK	Pharmacokinetic		VISIT	2	20	1	Visit		0	0		0	0	0	339	499	V9	2017-10-13 16:55:47	2017-10-13 16:55:47	0	NONE	DATA	0	---	---	NO	NO					NO	NO	NO	YES	0			YES
SMR3571	PK	Pharmacokinetic		EPAABS_O	1	8	2	RBC EPA (absolute) - Original		0	0		0	0	0	0	499	V9	2017-10-13 16:55:47	2017-10-13 16:55:47	0	NONE	DATA	0	---	---	NO	NO					NO	NO	NO	YES	0			YES
SMR3571	PK	Pharmacokinetic		DHAABS_O	1	8	3	RBC DHA (absolute) - Original		0	0		0	0	0	8	499	V9	2017-10-13 16:55:47	2017-10-13 16:55:47	0	NONE	DATA	0	---	---	NO	NO					NO	NO	NO	YES	0			YES
SMR3571	PK	Pharmacokinetic		EPAPCT_O	1	8	4	RBC EPA (%) - Original		0	0		0	0	0	16	499	V9	2017-10-13 16:55:47	2017-10-13 16:55:47	0	NONE	DATA	0	---	---	NO	NO					NO	NO	NO	YES	0			YES
SMR3571	PK	Pharmacokinetic		DHAPCT	1	8	5	RBC DHA (%)		0	0		0	0	0	24	499	V9	2017-10-13 16:55:47	2017-10-13 16:55:47	0	NONE	DATA	0	---	---	NO	NO					NO	NO	NO	YES	0			YES
SMR3571	PK	Pharmacokinetic		RBC_N6	1	8	6	Total omega-6 PUFAs		0	0		0	0	0	32	499	V9	2017-10-13 16:55:47	2017-10-13 16:55:47	0	NONE	DATA	0	---	---	NO	NO					NO	NO	NO	YES	0			YES
SMR3571	PK	Pharmacokinetic		RBC_N3	1	8	7	Total omega-3 PUFAs		0	0		0	0	0	40	499	V9	2017-10-13 16:55:47	2017-10-13 16:55:47	0	NONE	DATA	0	---	---	NO	NO					NO	NO	NO	YES	0			YES
SMR3571	PK	Pharmacokinetic		VISITNUM	1	8	8	Visit	VISIT	0	0		0	0	0	48	499	V9	2017-10-13 16:55:47	2017-10-13 16:55:47	0	NONE	DATA	0	---	---	NO	NO					NO	NO	NO	YES	0			YES
SMR3571	PK	Pharmacokinetic		SUBJID	2	200	9	Subject ID		0	0		0	0	0	359	499	V9	2017-10-13 16:55:47	2017-10-13 16:55:47	0	NONE	DATA	0	---	---	NO	NO					NO	NO	NO	YES	0			YES
SMR3571	PK	Pharmacokinetic		RBCDT	1	8	10	RBC Date	DATE	9	0		0	0	0	56	499	V9	2017-10-13 16:55:47	2017-10-13 16:55:47	0	NONE	DATA	0	---	---	NO	NO					NO	NO	NO	YES	0			YES
SMR3571	PK	Pharmacokinetic		CDRBC	2	9	11	RBC Date		0	0		0	0	0	559	499	V9	2017-10-13 16:55:47	2017-10-13 16:55:47	0	NONE	DATA	0	---	---	NO	NO					NO	NO	NO	YES	0			YES
SMR3571	PK	Pharmacokinetic		EPAABS	1	8	12	RBC EPA (absolute)		0	0		0	0	0	64	499	V9	2017-10-13 16:55:47	2017-10-13 16:55:47	0	NONE	DATA	0	---	---	NO	NO					NO	NO	NO	YES	0			YES
SMR3571	PK	Pharmacokinetic		DHAABS	1	8	13	RBC DHA (absolute)		0	0		0	0	0	72	499	V9	2017-10-13 16:55:47	2017-10-13 16:55:47	0	NONE	DATA	0	---	---	NO	NO					NO	NO	NO	YES	0			YES
SMR3571	PK	Pharmacokinetic		EPAPCT	1	8	14	RBC EPA (%)		0	0		0	0	0	80	499	V9	2017-10-13 16:55:47	2017-10-13 16:55:47	0	NONE	DATA	0	---	---	NO	NO					NO	NO	NO	YES	0			YES
SMR3571	PK	Pharmacokinetic		EDABS	1	8	15	RBC EPA+DHA (absolute)		0	0		0	0	0	88	499	V9	2017-10-13 16:55:47	2017-10-13 16:55:47	0	NONE	DATA	0	---	---	NO	NO					NO	NO	NO	YES	0			YES
SMR3571	PK	Pharmacokinetic		EDPCT	1	8	16	RBC EPA+DHA (%)		0	0		0	0	0	96	499	V9	2017-10-13 16:55:47	2017-10-13 16:55:47	0	NONE	DATA	0	---	---	NO	NO					NO	NO	NO	YES	0			YES
SMR3571	PK	Pharmacokinetic		RBC_R	1	8	17	Omega-6:Omega-3 Ratio		0	0		0	0	0	104	499	V9	2017-10-13 16:55:47	2017-10-13 16:55:47	0	NONE	DATA	0	---	---	NO	NO					NO	NO	NO	YES	0			YES
SMR3571	PK	Pharmacokinetic		B_EPAABS	1	8	18	Baseline RBC EPA (absolute)		0	0		0	0	0	112	499	V9	2017-10-13 16:55:47	2017-10-13 16:55:47	0	NONE	DATA	0	---	---	NO	NO					NO	NO	NO	YES	0			YES
SMR3571	PK	Pharmacokinetic		B_DHAABS	1	8	19	Baseline RBC DHA (absolute)		0	0		0	0	0	120	499	V9	2017-10-13 16:55:47	2017-10-13 16:55:47	0	NONE	DATA	0	---	---	NO	NO					NO	NO	NO	YES	0			YES
SMR3571	PK	Pharmacokinetic		B_EPAPCT	1	8	20	Baseline RBC EPA (%)		0	0		0	0	0	128	499	V9	2017-10-13 16:55:47	2017-10-13 16:55:47	0	NONE	DATA	0	---	---	NO	NO					NO	NO	NO	YES	0			YES
SMR3571	PK	Pharmacokinetic		B_DHAPCT	1	8	21	Baseline RBC DHA (%)		0	0		0	0	0	136	499	V9	2017-10-13 16:55:47	2017-10-13 16:55:47	0	NONE	DATA	0	---	---	NO	NO					NO	NO	NO	YES	0			YES
SMR3571	PK	Pharmacokinetic		B_EDABS	1	8	22	Baseline RBC EPA+DHA (absolute)		0	0		0	0	0	144	499	V9	2017-10-13 16:55:47	2017-10-13 16:55:47	0	NONE	DATA	0	---	---	NO	NO					NO	NO	NO	YES	0			YES
SMR3571	PK	Pharmacokinetic		B_EDPCT	1	8	23	Baseline RBC EPA+DHA (%)		0	0		0	0	0	152	499	V9	2017-10-13 16:55:47	2017-10-13 16:55:47	0	NONE	DATA	0	---	---	NO	NO					NO	NO	NO	YES	0			YES
SMR3571	PK	Pharmacokinetic		B_RBC_R	1	8	24	Baseline Omega-6:Omega-3 Ratio		0	0		0	0	0	160	499	V9	2017-10-13 16:55:47	2017-10-13 16:55:47	0	NONE	DATA	0	---	---	NO	NO					NO	NO	NO	YES	0			YES
SMR3571	PK	Pharmacokinetic		D_EPAABS	1	8	25	RBC EPA (absolute) Diff. from Baseline		0	0		0	0	0	168	499	V9	2017-10-13 16:55:47	2017-10-13 16:55:47	0	NONE	DATA	0	---	---	NO	NO					NO	NO	NO	YES	0			YES
SMR3571	PK	Pharmacokinetic		D_DHAABS	1	8	26	RBC DHA (absolute) Diff. from Baseline		0	0		0	0	0	176	499	V9	2017-10-13 16:55:47	2017-10-13 16:55:47	0	NONE	DATA	0	---	---	NO	NO					NO	NO	NO	YES	0			YES
SMR3571	PK	Pharmacokinetic		D_EPAPCT	1	8	27	RBC EPA (%) Diff. from Baseline		0	0		0	0	0	184	499	V9	2017-10-13 16:55:47	2017-10-13 16:55:47	0	NONE	DATA	0	---	---	NO	NO					NO	NO	NO	YES	0			YES
SMR3571	PK	Pharmacokinetic		D_DHAPCT	1	8	28	RBC DHA (%) Diff. from Baseline		0	0		0	0	0	192	499	V9	2017-10-13 16:55:47	2017-10-13 16:55:47	0	NONE	DATA	0	---	---	NO	NO					NO	NO	NO	YES	0			YES
SMR3571	PK	Pharmacokinetic		D_EDABS	1	8	29	RBC EPA+DHA (absolute) Diff. from Baseli		0	0		0	0	0	200	499	V9	2017-10-13 16:55:47	2017-10-13 16:55:47	0	NONE	DATA	0	---	---	NO	NO					NO	NO	NO	YES	0			YES
SMR3571	PK	Pharmacokinetic		D_EDPCT	1	8	30	RBC EPA+DHA (%) Diff. from Baseline		0	0		0	0	0	208	499	V9	2017-10-13 16:55:47	2017-10-13 16:55:47	0	NONE	DATA	0	---	---	NO	NO					NO	NO	NO	YES	0			YES
SMR3571	PK	Pharmacokinetic		D_RBC_R	1	8	31	Omega-6:Omega-3 Ratio Diff.from Baseline		0	0		0	0	0	216	499	V9	2017-10-13 16:55:47	2017-10-13 16:55:47	0	NONE	DATA	0	---	---	NO	NO					NO	NO	NO	YES	0			YES
SMR3571	PK	Pharmacokinetic		SITE	2	21	32	Site		0	0		0	0	0	568	499	V9	2017-10-13 16:55:47	2017-10-13 16:55:47	0	NONE	DATA	0	---	---	NO	NO					NO	NO	NO	YES	0			YES
SMR3571	PK	Pharmacokinetic		STATUS	2	17	33	Subject Status		0	0		0	0	0	589	499	V9	2017-10-13 16:55:47	2017-10-13 16:55:47	0	NONE	DATA	0	---	---	NO	NO					NO	NO	NO	YES	0			YES
SMR3571	PK	Pharmacokinetic		AGE	1	3	34	Age, calculated		0	0		0	0	0	336	499	V9	2017-10-13 16:55:47	2017-10-13 16:55:47	0	NONE	DATA	0	---	---	NO	NO					NO	NO	NO	YES	0			YES
SMR3571	PK	Pharmacokinetic		SEX	1	8	35	Sex	SEX	0	0		0	0	0	224	499	V9	2017-10-13 16:55:47	2017-10-13 16:55:47	0	NONE	DATA	0	---	---	NO	NO					NO	NO	NO	YES	0			YES
SMR3571	PK	Pharmacokinetic		FIRSTDT	1	8	36	First Dose Date	DATE	9	0		0	0	0	232	499	V9	2017-10-13 16:55:47	2017-10-13 16:55:47	0	NONE	DATA	0	---	---	NO	NO					NO	NO	NO	YES	0			YES
SMR3571	PK	Pharmacokinetic		RANDNO	1	8	37	Randomization Number		0	0		0	0	0	240	499	V9	2017-10-13 16:55:47	2017-10-13 16:55:47	0	NONE	DATA	0	---	---	NO	NO					NO	NO	NO	YES	0			YES
SMR3571	PK	Pharmacokinetic		TREAT	1	8	38	Treatment Group	TREAT	0	0		0	0	0	248	499	V9	2017-10-13 16:55:47	2017-10-13 16:55:47	0	NONE	DATA	0	---	---	NO	NO					NO	NO	NO	YES	0			YES
SMR3571	PK	Pharmacokinetic		OMEGA	1	8	39	Omega-3 Intake (randomization)	OMEGA	0	0		0	0	0	256	499	V9	2017-10-13 16:55:47	2017-10-13 16:55:47	0	NONE	DATA	0	---	---	NO	NO					NO	NO	NO	YES	0			YES
SMR3571	PK	Pharmacokinetic		DIABETE	1	8	40	Diabetes (randomization)	YN	0	0		0	0	0	264	499	V9	2017-10-13 16:55:47	2017-10-13 16:55:47	0	NONE	DATA	0	---	---	NO	NO					NO	NO	NO	YES	0			YES
SMR3571	PK	Pharmacokinetic		STATIN	1	8	41	Statins (randomization)	YN	0	0		0	0	0	272	499	V9	2017-10-13 16:55:47	2017-10-13 16:55:47	0	NONE	DATA	0	---	---	NO	NO					NO	NO	NO	YES	0			YES
SMR3571	PK	Pharmacokinetic		OMEGA_C	1	8	42	Omega-3 Intake (reported)	OMEGA	0	0		0	0	0	280	499	V9	2017-10-13 16:55:47	2017-10-13 16:55:47	0	NONE	DATA	0	---	---	NO	NO					NO	NO	NO	YES	0			YES
SMR3571	PK	Pharmacokinetic		SFFL	1	8	43	Screen Failure Flag	YN	0	0		0	0	0	288	499	V9	2017-10-13 16:55:47	2017-10-13 16:55:47	0	NONE	DATA	0	---	---	NO	NO					NO	NO	NO	YES	0			YES
SMR3571	PK	Pharmacokinetic		SAFETY	1	8	44	Safety Population	YN	0	0		0	0	0	296	499	V9	2017-10-13 16:55:47	2017-10-13 16:55:47	0	NONE	DATA	0	---	---	NO	NO					NO	NO	NO	YES	0			YES
SMR3571	PK	Pharmacokinetic		ITT	1	8	45	Intent to Treat Population	YN	0	0		0	0	0	304	499	V9	2017-10-13 16:55:47	2017-10-13 16:55:47	0	NONE	DATA	0	---	---	NO	NO					NO	NO	NO	YES	0			YES
SMR3571	PK	Pharmacokinetic		MITT	1	8	46	Modified Intent to Treat Population	YN	0	0		0	0	0	312	499	V9	2017-10-13 16:55:47	2017-10-13 16:55:47	0	NONE	DATA	0	---	---	NO	NO					NO	NO	NO	YES	0			YES
SMR3571	PK	Pharmacokinetic		PP	1	8	47	Per Protocol Population	YN	0	0		0	0	0	320	499	V9	2017-10-13 16:55:47	2017-10-13 16:55:47	0	NONE	DATA	0	---	---	NO	NO					NO	NO	NO	YES	0			YES
SMR3571	PK	Pharmacokinetic		RBCDAY	1	8	48	Study Day		0	0		0	0	0	328	499	V9	2017-10-13 16:55:47	2017-10-13 16:55:47	0	NONE	DATA	0	---	---	NO	NO					NO	NO	NO	YES	0			YES
SMR3571	RP	Reproductive Status		VISIT	2	7	1	Visit		0	0		0	0	0	171	123	V9	2017-10-13 16:55:47	2017-10-13 16:55:47	0	NONE	DATA	0	---	---	NO	NO					NO	NO	NO	YES	0			YES
SMR3571	RP	Reproductive Status		OTHSTERC	2	1	2	If other sterile condition, specify		0	0		0	0	0	178	123	V9	2017-10-13 16:55:47	2017-10-13 16:55:47	0	NONE	DATA	0	---	---	NO	NO					NO	NO	NO	YES	0			YES
SMR3571	RP	Reproductive Status		CONTRAOT	2	1	3	If other, specify		0	0		0	0	0	179	123	V9	2017-10-13 16:55:47	2017-10-13 16:55:47	0	NONE	DATA	0	---	---	NO	NO					NO	NO	NO	YES	0			YES
SMR3571	RP	Reproductive Status		LOT_NUM	2	7	4	Lot number		0	0		0	0	0	180	123	V9	2017-10-13 16:55:47	2017-10-13 16:55:47	0	NONE	DATA	0	---	---	NO	NO					NO	NO	NO	YES	0			YES
SMR3571	RP	Reproductive Status		COMMENTS	2	165	5	Comments		0	0		0	0	0	187	123	V9	2017-10-13 16:55:47	2017-10-13 16:55:47	0	NONE	DATA	0	---	---	NO	NO					NO	NO	NO	YES	0			YES
SMR3571	RP	Reproductive Status		RPSTAT	1	8	6	Female Status	FEMALE_STATUS	0	0		0	0	0	0	123	V9	2017-10-13 16:55:47	2017-10-13 16:55:47	0	NONE	DATA	0	---	---	NO	NO					NO	NO	NO	YES	0			YES
SMR3571	RP	Reproductive Status		CONTRA	1	8	7	Method of Contraception	METHOD_OF_CONTRACEPTION	0	0		0	0	0	8	123	V9	2017-10-13 16:55:47	2017-10-13 16:55:47	0	NONE	DATA	0	---	---	NO	NO					NO	NO	NO	YES	0			YES
SMR3571	RP	Reproductive Status		RPORRES	1	8	8	Result of pregnancy test	RESULT_OF_PREGNANCY_TEST	0	0		0	0	0	16	123	V9	2017-10-13 16:55:47	2017-10-13 16:55:47	0	NONE	DATA	0	---	---	NO	NO					NO	NO	NO	YES	0			YES
SMR3571	RP	Reproductive Status		SUBJID	2	10	9	Subject ID		0	0		0	0	0	352	123	V9	2017-10-13 16:55:47	2017-10-13 16:55:47	0	NONE	DATA	0	---	---	NO	NO					NO	NO	NO	YES	0			YES
SMR3571	RP	Reproductive Status		VISITNUM	1	8	10	Visit		0	0		0	0	0	24	123	V9	2017-10-13 16:55:47	2017-10-13 16:55:47	0	NONE	DATA	0	---	---	NO	NO					NO	NO	NO	YES	0			YES
SMR3571	RP	Reproductive Status		SUSTERDT	1	8	11	Date of surgical sterilization	DATE	9	0		0	0	0	32	123	V9	2017-10-13 16:55:47	2017-10-13 16:55:47	0	NONE	DATA	0	---	---	NO	NO					NO	NO	NO	YES	0			YES
SMR3571	RP	Reproductive Status		CDSUSTER	2	9	12	Date of surgical sterilization		0	0		0	0	0	362	123	V9	2017-10-13 16:55:47	2017-10-13 16:55:47	0	NONE	DATA	0	---	---	NO	NO					NO	NO	NO	YES	0			YES
SMR3571	RP	Reproductive Status		LMENSTDT	1	8	13	Date of last menstruation	DATE	9	0		0	0	0	40	123	V9	2017-10-13 16:55:47	2017-10-13 16:55:47	0	NONE	DATA	0	---	---	NO	NO					NO	NO	NO	YES	0			YES
SMR3571	RP	Reproductive Status		CDLMENST	2	9	14	Date of last menstruation		0	0		0	0	0	371	123	V9	2017-10-13 16:55:47	2017-10-13 16:55:47	0	NONE	DATA	0	---	---	NO	NO					NO	NO	NO	YES	0			YES
SMR3571	RP	Reproductive Status		EXPDT	1	8	15	Expiry date	DATE	9	0		0	0	0	48	123	V9	2017-10-13 16:55:47	2017-10-13 16:55:47	0	NONE	DATA	0	---	---	NO	NO					NO	NO	NO	YES	0			YES
SMR3571	RP	Reproductive Status		CDEXP	2	9	16	Expiry date		0	0		0	0	0	380	123	V9	2017-10-13 16:55:47	2017-10-13 16:55:47	0	NONE	DATA	0	---	---	NO	NO					NO	NO	NO	YES	0			YES
SMR3571	RP	Reproductive Status		SAMPLEDT	1	8	17	Date of pregnancy test	DATE	9	0		0	0	0	56	123	V9	2017-10-13 16:55:47	2017-10-13 16:55:47	0	NONE	DATA	0	---	---	NO	NO					NO	NO	NO	YES	0			YES
SMR3571	RP	Reproductive Status		CDSAMPLE	2	9	18	Date of pregnancy test		0	0		0	0	0	389	123	V9	2017-10-13 16:55:47	2017-10-13 16:55:47	0	NONE	DATA	0	---	---	NO	NO					NO	NO	NO	YES	0			YES
SMR3571	RP	Reproductive Status		SITE	2	21	19	Site		0	0		0	0	0	398	123	V9	2017-10-13 16:55:47	2017-10-13 16:55:47	0	NONE	DATA	0	---	---	NO	NO					NO	NO	NO	YES	0			YES
SMR3571	RP	Reproductive Status		STATUS	2	17	20	Subject Status		0	0		0	0	0	419	123	V9	2017-10-13 16:55:47	2017-10-13 16:55:47	0	NONE	DATA	0	---	---	NO	NO					NO	NO	NO	YES	0			YES
SMR3571	RP	Reproductive Status		AGE	1	3	21	Age, calculated		0	0		0	0	0	168	123	V9	2017-10-13 16:55:47	2017-10-13 16:55:47	0	NONE	DATA	0	---	---	NO	NO					NO	NO	NO	YES	0			YES
SMR3571	RP	Reproductive Status		SEX	1	8	22	Sex	SEX	0	0		0	0	0	64	123	V9	2017-10-13 16:55:47	2017-10-13 16:55:47	0	NONE	DATA	0	---	---	NO	NO					NO	NO	NO	YES	0			YES
SMR3571	RP	Reproductive Status		FIRSTDT	1	8	23	First Dose Date	DATE	9	0		0	0	0	72	123	V9	2017-10-13 16:55:47	2017-10-13 16:55:47	0	NONE	DATA	0	---	---	NO	NO					NO	NO	NO	YES	0			YES
SMR3571	RP	Reproductive Status		RANDNO	1	8	24	Randomization Number		0	0		0	0	0	80	123	V9	2017-10-13 16:55:47	2017-10-13 16:55:47	0	NONE	DATA	0	---	---	NO	NO					NO	NO	NO	YES	0			YES
SMR3571	RP	Reproductive Status		TREAT	1	8	25	Treatment Group	TREAT	0	0		0	0	0	88	123	V9	2017-10-13 16:55:47	2017-10-13 16:55:47	0	NONE	DATA	0	---	---	NO	NO					NO	NO	NO	YES	0			YES
SMR3571	RP	Reproductive Status		OMEGA	1	8	26	Omega-3 Intake (randomization)	OMEGA	0	0		0	0	0	96	123	V9	2017-10-13 16:55:47	2017-10-13 16:55:47	0	NONE	DATA	0	---	---	NO	NO					NO	NO	NO	YES	0			YES
SMR3571	RP	Reproductive Status		DIABETE	1	8	27	Diabetes (randomization)	YN	0	0		0	0	0	104	123	V9	2017-10-13 16:55:47	2017-10-13 16:55:47	0	NONE	DATA	0	---	---	NO	NO					NO	NO	NO	YES	0			YES
SMR3571	RP	Reproductive Status		STATIN	1	8	28	Statins (randomization)	YN	0	0		0	0	0	112	123	V9	2017-10-13 16:55:47	2017-10-13 16:55:47	0	NONE	DATA	0	---	---	NO	NO					NO	NO	NO	YES	0			YES
SMR3571	RP	Reproductive Status		OMEGA_C	1	8	29	Omega-3 Intake (reported)	OMEGA	0	0		0	0	0	120	123	V9	2017-10-13 16:55:47	2017-10-13 16:55:47	0	NONE	DATA	0	---	---	NO	NO					NO	NO	NO	YES	0			YES
SMR3571	RP	Reproductive Status		SFFL	1	8	30	Screen Failure Flag	YN	0	0		0	0	0	128	123	V9	2017-10-13 16:55:47	2017-10-13 16:55:47	0	NONE	DATA	0	---	---	NO	NO					NO	NO	NO	YES	0			YES
SMR3571	RP	Reproductive Status		SAFETY	1	8	31	Safety Population	YN	0	0		0	0	0	136	123	V9	2017-10-13 16:55:47	2017-10-13 16:55:47	0	NONE	DATA	0	---	---	NO	NO					NO	NO	NO	YES	0			YES
SMR3571	RP	Reproductive Status		ITT	1	8	32	Intent to Treat Population	YN	0	0		0	0	0	144	123	V9	2017-10-13 16:55:47	2017-10-13 16:55:47	0	NONE	DATA	0	---	---	NO	NO					NO	NO	NO	YES	0			YES
SMR3571	RP	Reproductive Status		MITT	1	8	33	Modified Intent to Treat Population	YN	0	0		0	0	0	152	123	V9	2017-10-13 16:55:47	2017-10-13 16:55:47	0	NONE	DATA	0	---	---	NO	NO					NO	NO	NO	YES	0			YES
SMR3571	RP	Reproductive Status		PP	1	8	34	Per Protocol Population	YN	0	0		0	0	0	160	123	V9	2017-10-13 16:55:47	2017-10-13 16:55:47	0	NONE	DATA	0	---	---	NO	NO					NO	NO	NO	YES	0			YES
SMR3571	RPQ	Pregnancy Question		VISIT	2	17	1	Visit		0	0		0	0	0	123	352	V9	2017-10-13 16:55:47	2017-10-13 16:55:47	0	NONE	DATA	0	---	---	NO	NO					NO	NO	NO	YES	0			YES
SMR3571	RPQ	Pregnancy Question		PREGQ	1	8	2	1. To the best of their knowledge, has s	YN	0	0		0	0	0	0	352	V9	2017-10-13 16:55:47	2017-10-13 16:55:47	0	NONE	DATA	0	---	---	NO	NO					NO	NO	NO	YES	0			YES
SMR3571	RPQ	Pregnancy Question		SUBJID	2	10	3	Subject ID		0	0		0	0	0	140	352	V9	2017-10-13 16:55:47	2017-10-13 16:55:47	0	NONE	DATA	0	---	---	NO	NO					NO	NO	NO	YES	0			YES
SMR3571	RPQ	Pregnancy Question		VISITNUM	1	8	4	Visit		0	0		0	0	0	8	352	V9	2017-10-13 16:55:47	2017-10-13 16:55:47	0	NONE	DATA	0	---	---	NO	NO					NO	NO	NO	YES	0			YES
SMR3571	RPQ	Pregnancy Question		SITE	2	21	5	Site		0	0		0	0	0	150	352	V9	2017-10-13 16:55:47	2017-10-13 16:55:47	0	NONE	DATA	0	---	---	NO	NO					NO	NO	NO	YES	0			YES
SMR3571	RPQ	Pregnancy Question		STATUS	2	17	6	Subject Status		0	0		0	0	0	171	352	V9	2017-10-13 16:55:47	2017-10-13 16:55:47	0	NONE	DATA	0	---	---	NO	NO					NO	NO	NO	YES	0			YES
SMR3571	RPQ	Pregnancy Question		AGE	1	3	7	Age, calculated		0	0		0	0	0	120	352	V9	2017-10-13 16:55:47	2017-10-13 16:55:47	0	NONE	DATA	0	---	---	NO	NO					NO	NO	NO	YES	0			YES
SMR3571	RPQ	Pregnancy Question		SEX	1	8	8	Sex	SEX	0	0		0	0	0	16	352	V9	2017-10-13 16:55:47	2017-10-13 16:55:47	0	NONE	DATA	0	---	---	NO	NO					NO	NO	NO	YES	0			YES
SMR3571	RPQ	Pregnancy Question		FIRSTDT	1	8	9	First Dose Date	DATE	9	0		0	0	0	24	352	V9	2017-10-13 16:55:47	2017-10-13 16:55:47	0	NONE	DATA	0	---	---	NO	NO					NO	NO	NO	YES	0			YES
SMR3571	RPQ	Pregnancy Question		RANDNO	1	8	10	Randomization Number		0	0		0	0	0	32	352	V9	2017-10-13 16:55:47	2017-10-13 16:55:47	0	NONE	DATA	0	---	---	NO	NO					NO	NO	NO	YES	0			YES
SMR3571	RPQ	Pregnancy Question		TREAT	1	8	11	Treatment Group	TREAT	0	0		0	0	0	40	352	V9	2017-10-13 16:55:47	2017-10-13 16:55:47	0	NONE	DATA	0	---	---	NO	NO					NO	NO	NO	YES	0			YES
SMR3571	RPQ	Pregnancy Question		OMEGA	1	8	12	Omega-3 Intake (randomization)	OMEGA	0	0		0	0	0	48	352	V9	2017-10-13 16:55:47	2017-10-13 16:55:47	0	NONE	DATA	0	---	---	NO	NO					NO	NO	NO	YES	0			YES
SMR3571	RPQ	Pregnancy Question		DIABETE	1	8	13	Diabetes (randomization)	YN	0	0		0	0	0	56	352	V9	2017-10-13 16:55:47	2017-10-13 16:55:47	0	NONE	DATA	0	---	---	NO	NO					NO	NO	NO	YES	0			YES
SMR3571	RPQ	Pregnancy Question		STATIN	1	8	14	Statins (randomization)	YN	0	0		0	0	0	64	352	V9	2017-10-13 16:55:47	2017-10-13 16:55:47	0	NONE	DATA	0	---	---	NO	NO					NO	NO	NO	YES	0			YES
SMR3571	RPQ	Pregnancy Question		OMEGA_C	1	8	15	Omega-3 Intake (reported)	OMEGA	0	0		0	0	0	72	352	V9	2017-10-13 16:55:47	2017-10-13 16:55:47	0	NONE	DATA	0	---	---	NO	NO					NO	NO	NO	YES	0			YES
SMR3571	RPQ	Pregnancy Question		SFFL	1	8	16	Screen Failure Flag	YN	0	0		0	0	0	80	352	V9	2017-10-13 16:55:47	2017-10-13 16:55:47	0	NONE	DATA	0	---	---	NO	NO					NO	NO	NO	YES	0			YES
SMR3571	RPQ	Pregnancy Question		SAFETY	1	8	17	Safety Population	YN	0	0		0	0	0	88	352	V9	2017-10-13 16:55:47	2017-10-13 16:55:47	0	NONE	DATA	0	---	---	NO	NO					NO	NO	NO	YES	0			YES
SMR3571	RPQ	Pregnancy Question		ITT	1	8	18	Intent to Treat Population	YN	0	0		0	0	0	96	352	V9	2017-10-13 16:55:47	2017-10-13 16:55:47	0	NONE	DATA	0	---	---	NO	NO					NO	NO	NO	YES	0			YES
SMR3571	RPQ	Pregnancy Question		MITT	1	8	19	Modified Intent to Treat Population	YN	0	0		0	0	0	104	352	V9	2017-10-13 16:55:47	2017-10-13 16:55:47	0	NONE	DATA	0	---	---	NO	NO					NO	NO	NO	YES	0			YES
SMR3571	RPQ	Pregnancy Question		PP	1	8	20	Per Protocol Population	YN	0	0		0	0	0	112	352	V9	2017-10-13 16:55:47	2017-10-13 16:55:47	0	NONE	DATA	0	---	---	NO	NO					NO	NO	NO	YES	0			YES
SMR3571	SV	Study Visit		VISIT	2	17	1	Visit		0	0		0	0	0	123	1145	V9	2017-10-13 16:55:47	2017-10-13 16:55:47	0	NONE	DATA	0	---	---	NO	NO					NO	NO	NO	YES	0			YES
SMR3571	SV	Study Visit		SUBJID	2	10	2	Subject ID		0	0		0	0	0	140	1145	V9	2017-10-13 16:55:47	2017-10-13 16:55:47	0	NONE	DATA	0	---	---	NO	NO					NO	NO	NO	YES	0			YES
SMR3571	SV	Study Visit		VISDT	1	8	3	Date of Visit	DATE	9	0		0	0	0	0	1145	V9	2017-10-13 16:55:47	2017-10-13 16:55:47	0	NONE	DATA	0	---	---	NO	NO					NO	NO	NO	YES	0			YES
SMR3571	SV	Study Visit		CDVIS	2	9	4	Date of Visit (Char)		0	0		0	0	0	150	1145	V9	2017-10-13 16:55:47	2017-10-13 16:55:47	0	NONE	DATA	0	---	---	NO	NO					NO	NO	NO	YES	0			YES
SMR3571	SV	Study Visit		VISITNUM	1	8	5	Visit Number		0	0		0	0	0	8	1145	V9	2017-10-13 16:55:47	2017-10-13 16:55:47	0	NONE	DATA	0	---	---	NO	NO					NO	NO	NO	YES	0			YES
SMR3571	SV	Study Visit		SITE	2	21	6	Site		0	0		0	0	0	159	1145	V9	2017-10-13 16:55:47	2017-10-13 16:55:47	0	NONE	DATA	0	---	---	NO	NO					NO	NO	NO	YES	0			YES
SMR3571	SV	Study Visit		STATUS	2	17	7	Subject Status		0	0		0	0	0	180	1145	V9	2017-10-13 16:55:47	2017-10-13 16:55:47	0	NONE	DATA	0	---	---	NO	NO					NO	NO	NO	YES	0			YES
SMR3571	SV	Study Visit		AGE	1	3	8	Age, calculated		0	0		0	0	0	120	1145	V9	2017-10-13 16:55:47	2017-10-13 16:55:47	0	NONE	DATA	0	---	---	NO	NO					NO	NO	NO	YES	0			YES
SMR3571	SV	Study Visit		SEX	1	8	9	Sex	SEX	0	0		0	0	0	16	1145	V9	2017-10-13 16:55:47	2017-10-13 16:55:47	0	NONE	DATA	0	---	---	NO	NO					NO	NO	NO	YES	0			YES
SMR3571	SV	Study Visit		FIRSTDT	1	8	10	First Dose Date	DATE	9	0		0	0	0	24	1145	V9	2017-10-13 16:55:47	2017-10-13 16:55:47	0	NONE	DATA	0	---	---	NO	NO					NO	NO	NO	YES	0			YES
SMR3571	SV	Study Visit		RANDNO	1	8	11	Randomization Number		0	0		0	0	0	32	1145	V9	2017-10-13 16:55:47	2017-10-13 16:55:47	0	NONE	DATA	0	---	---	NO	NO					NO	NO	NO	YES	0			YES
SMR3571	SV	Study Visit		TREAT	1	8	12	Treatment Group	TREAT	0	0		0	0	0	40	1145	V9	2017-10-13 16:55:47	2017-10-13 16:55:47	0	NONE	DATA	0	---	---	NO	NO					NO	NO	NO	YES	0			YES
SMR3571	SV	Study Visit		OMEGA	1	8	13	Omega-3 Intake (randomization)	OMEGA	0	0		0	0	0	48	1145	V9	2017-10-13 16:55:47	2017-10-13 16:55:47	0	NONE	DATA	0	---	---	NO	NO					NO	NO	NO	YES	0			YES
SMR3571	SV	Study Visit		DIABETE	1	8	14	Diabetes (randomization)	YN	0	0		0	0	0	56	1145	V9	2017-10-13 16:55:47	2017-10-13 16:55:47	0	NONE	DATA	0	---	---	NO	NO					NO	NO	NO	YES	0			YES
SMR3571	SV	Study Visit		STATIN	1	8	15	Statins (randomization)	YN	0	0		0	0	0	64	1145	V9	2017-10-13 16:55:47	2017-10-13 16:55:47	0	NONE	DATA	0	---	---	NO	NO					NO	NO	NO	YES	0			YES
SMR3571	SV	Study Visit		OMEGA_C	1	8	16	Omega-3 Intake (reported)	OMEGA	0	0		0	0	0	72	1145	V9	2017-10-13 16:55:47	2017-10-13 16:55:47	0	NONE	DATA	0	---	---	NO	NO					NO	NO	NO	YES	0			YES
SMR3571	SV	Study Visit		SFFL	1	8	17	Screen Failure Flag	YN	0	0		0	0	0	80	1145	V9	2017-10-13 16:55:47	2017-10-13 16:55:47	0	NONE	DATA	0	---	---	NO	NO					NO	NO	NO	YES	0			YES
SMR3571	SV	Study Visit		SAFETY	1	8	18	Safety Population	YN	0	0		0	0	0	88	1145	V9	2017-10-13 16:55:47	2017-10-13 16:55:47	0	NONE	DATA	0	---	---	NO	NO					NO	NO	NO	YES	0			YES
SMR3571	SV	Study Visit		ITT	1	8	19	Intent to Treat Population	YN	0	0		0	0	0	96	1145	V9	2017-10-13 16:55:47	2017-10-13 16:55:47	0	NONE	DATA	0	---	---	NO	NO					NO	NO	NO	YES	0			YES
SMR3571	SV	Study Visit		MITT	1	8	20	Modified Intent to Treat Population	YN	0	0		0	0	0	104	1145	V9	2017-10-13 16:55:47	2017-10-13 16:55:47	0	NONE	DATA	0	---	---	NO	NO					NO	NO	NO	YES	0			YES
SMR3571	SV	Study Visit		PP	1	8	21	Per Protocol Population	YN	0	0		0	0	0	112	1145	V9	2017-10-13 16:55:47	2017-10-13 16:55:47	0	NONE	DATA	0	---	---	NO	NO					NO	NO	NO	YES	0			YES
SMR3571	VS	Vital Signs		VISIT	2	17	1	Visit		0	0		0	0	0	305	896	V9	2017-10-13 16:55:47	2017-10-13 16:55:47	0	NONE	DATA	0	---	---	NO	NO					NO	NO	NO	YES	0			YES
SMR3571	VS	Vital Signs		SBP	1	4	2	Systolic blood pressure (mmHg)		0	0		0	0	0	288	896	V9	2017-10-13 16:55:47	2017-10-13 16:55:47	0	NONE	DATA	0	---	---	NO	NO					NO	NO	NO	YES	0			YES
SMR3571	VS	Vital Signs		DBP	1	4	3	Diastolic blood pressure (mmHg)		0	0		0	0	0	292	896	V9	2017-10-13 16:55:47	2017-10-13 16:55:47	0	NONE	DATA	0	---	---	NO	NO					NO	NO	NO	YES	0			YES
SMR3571	VS	Vital Signs		HR	1	3	4	Heart Rate (beats/min.)		0	0		0	0	0	296	896	V9	2017-10-13 16:55:47	2017-10-13 16:55:47	0	NONE	DATA	0	---	---	NO	NO					NO	NO	NO	YES	0			YES
SMR3571	VS	Vital Signs		HEIGHT	1	3	5	Height (inch)		0	0		0	0	0	299	896	V9	2017-10-13 16:55:47	2017-10-13 16:55:47	0	NONE	DATA	0	---	---	NO	NO					NO	NO	NO	YES	0			YES
SMR3571	VS	Vital Signs		WEIGHT	1	8	6	Weight (lb)		0	0		0	0	0	0	896	V9	2017-10-13 16:55:47	2017-10-13 16:55:47	0	NONE	DATA	0	---	---	NO	NO					NO	NO	NO	YES	0			YES
SMR3571	VS	Vital Signs		HIP	1	8	7	Hip circumference (inch)		0	0		0	0	0	8	896	V9	2017-10-13 16:55:47	2017-10-13 16:55:47	0	NONE	DATA	0	---	---	NO	NO					NO	NO	NO	YES	0			YES
SMR3571	VS	Vital Signs		WAIST	1	8	8	Waist circumference (inch)		0	0		0	0	0	16	896	V9	2017-10-13 16:55:47	2017-10-13 16:55:47	0	NONE	DATA	0	---	---	NO	NO					NO	NO	NO	YES	0			YES
SMR3571	VS	Vital Signs		WHR	1	8	9	Waist to Hip Ratio		0	0		0	0	0	24	896	V9	2017-10-13 16:55:47	2017-10-13 16:55:47	0	NONE	DATA	0	---	---	NO	NO					NO	NO	NO	YES	0			YES
SMR3571	VS	Vital Signs		SUBJID	2	10	10	Subject ID		0	0		0	0	0	322	896	V9	2017-10-13 16:55:47	2017-10-13 16:55:47	0	NONE	DATA	0	---	---	NO	NO					NO	NO	NO	YES	0			YES
SMR3571	VS	Vital Signs		VISITNUM	1	8	11	Visit	VISIT	0	0		0	0	0	32	896	V9	2017-10-13 16:55:47	2017-10-13 16:55:47	0	NONE	DATA	0	---	---	NO	NO					NO	NO	NO	YES	0			YES
SMR3571	VS	Vital Signs		BMI	1	8	12	Body Mass Index (kg/m^2)		0	0		0	0	0	40	896	V9	2017-10-13 16:55:47	2017-10-13 16:55:47	0	NONE	DATA	0	---	---	NO	NO					NO	NO	NO	YES	0			YES
SMR3571	VS	Vital Signs		B_SBP	1	8	13	SBP at Baseline (mmHg)		0	0		0	0	0	48	896	V9	2017-10-13 16:55:47	2017-10-13 16:55:47	0	NONE	DATA	0	---	---	NO	NO					NO	NO	NO	YES	0			YES
SMR3571	VS	Vital Signs		D_SBP	1	8	14	SBP Change from Baseline (mmHg)		0	0		0	0	0	56	896	V9	2017-10-13 16:55:47	2017-10-13 16:55:47	0	NONE	DATA	0	---	---	NO	NO					NO	NO	NO	YES	0			YES
SMR3571	VS	Vital Signs		B_DBP	1	8	15	DBP at Baseline (mmHg)		0	0		0	0	0	64	896	V9	2017-10-13 16:55:47	2017-10-13 16:55:47	0	NONE	DATA	0	---	---	NO	NO					NO	NO	NO	YES	0			YES
SMR3571	VS	Vital Signs		D_DBP	1	8	16	DBP Change from Baseline (mmHg)		0	0		0	0	0	72	896	V9	2017-10-13 16:55:47	2017-10-13 16:55:47	0	NONE	DATA	0	---	---	NO	NO					NO	NO	NO	YES	0			YES
SMR3571	VS	Vital Signs		B_HR	1	8	17	HEART RATE at Baseline (beats/min		0	0		0	0	0	80	896	V9	2017-10-13 16:55:47	2017-10-13 16:55:47	0	NONE	DATA	0	---	---	NO	NO					NO	NO	NO	YES	0			YES
SMR3571	VS	Vital Signs		D_HR	1	8	18	HEART RATE Change from Baseline (beats/m		0	0		0	0	0	88	896	V9	2017-10-13 16:55:47	2017-10-13 16:55:47	0	NONE	DATA	0	---	---	NO	NO					NO	NO	NO	YES	0			YES
SMR3571	VS	Vital Signs		B_WEIGHT	1	8	19	WEIGHT at Baseline (lb)		0	0		0	0	0	96	896	V9	2017-10-13 16:55:47	2017-10-13 16:55:47	0	NONE	DATA	0	---	---	NO	NO					NO	NO	NO	YES	0			YES
SMR3571	VS	Vital Signs		D_WEIGHT	1	8	20	WEIGHT Change from Baseline (lb)		0	0		0	0	0	104	896	V9	2017-10-13 16:55:47	2017-10-13 16:55:47	0	NONE	DATA	0	---	---	NO	NO					NO	NO	NO	YES	0			YES
SMR3571	VS	Vital Signs		B_BMI	1	8	21	BMI at Baseline (kg/m^2)		0	0		0	0	0	112	896	V9	2017-10-13 16:55:47	2017-10-13 16:55:47	0	NONE	DATA	0	---	---	NO	NO					NO	NO	NO	YES	0			YES
SMR3571	VS	Vital Signs		D_BMI	1	8	22	BMI Change from Baseline (kg/m^2)		0	0		0	0	0	120	896	V9	2017-10-13 16:55:47	2017-10-13 16:55:47	0	NONE	DATA	0	---	---	NO	NO					NO	NO	NO	YES	0			YES
SMR3571	VS	Vital Signs		B_WAIST	1	8	23	WAIST at Baseline (inch)		0	0		0	0	0	128	896	V9	2017-10-13 16:55:47	2017-10-13 16:55:47	0	NONE	DATA	0	---	---	NO	NO					NO	NO	NO	YES	0			YES
SMR3571	VS	Vital Signs		D_WAIST	1	8	24	WAIST Change from Baseline (inch)		0	0		0	0	0	136	896	V9	2017-10-13 16:55:47	2017-10-13 16:55:47	0	NONE	DATA	0	---	---	NO	NO					NO	NO	NO	YES	0			YES
SMR3571	VS	Vital Signs		B_HIP	1	8	25	HIP at Baseline (inch)		0	0		0	0	0	144	896	V9	2017-10-13 16:55:47	2017-10-13 16:55:47	0	NONE	DATA	0	---	---	NO	NO					NO	NO	NO	YES	0			YES
SMR3571	VS	Vital Signs		D_HIP	1	8	26	HIP Change from Baseline (inch)		0	0		0	0	0	152	896	V9	2017-10-13 16:55:47	2017-10-13 16:55:47	0	NONE	DATA	0	---	---	NO	NO					NO	NO	NO	YES	0			YES
SMR3571	VS	Vital Signs		B_WHR	1	8	27	WAIST/HIP RATIO at Baseline		0	0		0	0	0	160	896	V9	2017-10-13 16:55:47	2017-10-13 16:55:47	0	NONE	DATA	0	---	---	NO	NO					NO	NO	NO	YES	0			YES
SMR3571	VS	Vital Signs		D_WHR	1	8	28	WAIST/HIP RATIO Change from Baseline		0	0		0	0	0	168	896	V9	2017-10-13 16:55:47	2017-10-13 16:55:47	0	NONE	DATA	0	---	---	NO	NO					NO	NO	NO	YES	0			YES
SMR3571	VS	Vital Signs		C_WEIGHT	1	8	29	Weight Gain/Loss at Week 24	WCHANGE	0	0		0	0	0	176	896	V9	2017-10-13 16:55:47	2017-10-13 16:55:47	0	NONE	DATA	0	---	---	NO	NO					NO	NO	NO	YES	0			YES
SMR3571	VS	Vital Signs		SITE	2	21	30	Site		0	0		0	0	0	332	896	V9	2017-10-13 16:55:47	2017-10-13 16:55:47	0	NONE	DATA	0	---	---	NO	NO					NO	NO	NO	YES	0			YES
SMR3571	VS	Vital Signs		STATUS	2	17	31	Subject Status		0	0		0	0	0	353	896	V9	2017-10-13 16:55:47	2017-10-13 16:55:47	0	NONE	DATA	0	---	---	NO	NO					NO	NO	NO	YES	0			YES
SMR3571	VS	Vital Signs		AGE	1	3	32	Age, calculated		0	0		0	0	0	302	896	V9	2017-10-13 16:55:47	2017-10-13 16:55:47	0	NONE	DATA	0	---	---	NO	NO					NO	NO	NO	YES	0			YES
SMR3571	VS	Vital Signs		SEX	1	8	33	Sex	SEX	0	0		0	0	0	184	896	V9	2017-10-13 16:55:47	2017-10-13 16:55:47	0	NONE	DATA	0	---	---	NO	NO					NO	NO	NO	YES	0			YES
SMR3571	VS	Vital Signs		FIRSTDT	1	8	34	First Dose Date	DATE	9	0		0	0	0	192	896	V9	2017-10-13 16:55:47	2017-10-13 16:55:47	0	NONE	DATA	0	---	---	NO	NO					NO	NO	NO	YES	0			YES
SMR3571	VS	Vital Signs		RANDNO	1	8	35	Randomization Number		0	0		0	0	0	200	896	V9	2017-10-13 16:55:47	2017-10-13 16:55:47	0	NONE	DATA	0	---	---	NO	NO					NO	NO	NO	YES	0			YES
SMR3571	VS	Vital Signs		TREAT	1	8	36	Treatment Group	TREAT	0	0		0	0	0	208	896	V9	2017-10-13 16:55:47	2017-10-13 16:55:47	0	NONE	DATA	0	---	---	NO	NO					NO	NO	NO	YES	0			YES
SMR3571	VS	Vital Signs		OMEGA	1	8	37	Omega-3 Intake (randomization)	OMEGA	0	0		0	0	0	216	896	V9	2017-10-13 16:55:47	2017-10-13 16:55:47	0	NONE	DATA	0	---	---	NO	NO					NO	NO	NO	YES	0			YES
SMR3571	VS	Vital Signs		DIABETE	1	8	38	Diabetes (randomization)	YN	0	0		0	0	0	224	896	V9	2017-10-13 16:55:47	2017-10-13 16:55:47	0	NONE	DATA	0	---	---	NO	NO					NO	NO	NO	YES	0			YES
SMR3571	VS	Vital Signs		STATIN	1	8	39	Statins (randomization)	YN	0	0		0	0	0	232	896	V9	2017-10-13 16:55:47	2017-10-13 16:55:47	0	NONE	DATA	0	---	---	NO	NO					NO	NO	NO	YES	0			YES
SMR3571	VS	Vital Signs		OMEGA_C	1	8	40	Omega-3 Intake (reported)	OMEGA	0	0		0	0	0	240	896	V9	2017-10-13 16:55:47	2017-10-13 16:55:47	0	NONE	DATA	0	---	---	NO	NO					NO	NO	NO	YES	0			YES
SMR3571	VS	Vital Signs		SFFL	1	8	41	Screen Failure Flag	YN	0	0		0	0	0	248	896	V9	2017-10-13 16:55:47	2017-10-13 16:55:47	0	NONE	DATA	0	---	---	NO	NO					NO	NO	NO	YES	0			YES
SMR3571	VS	Vital Signs		SAFETY	1	8	42	Safety Population	YN	0	0		0	0	0	256	896	V9	2017-10-13 16:55:47	2017-10-13 16:55:47	0	NONE	DATA	0	---	---	NO	NO					NO	NO	NO	YES	0			YES
SMR3571	VS	Vital Signs		ITT	1	8	43	Intent to Treat Population	YN	0	0		0	0	0	264	896	V9	2017-10-13 16:55:47	2017-10-13 16:55:47	0	NONE	DATA	0	---	---	NO	NO					NO	NO	NO	YES	0			YES
SMR3571	VS	Vital Signs		MITT	1	8	44	Modified Intent to Treat Population	YN	0	0		0	0	0	272	896	V9	2017-10-13 16:55:47	2017-10-13 16:55:47	0	NONE	DATA	0	---	---	NO	NO					NO	NO	NO	YES	0			YES
SMR3571	VS	Vital Signs		PP	1	8	45	Per Protocol Population	YN	0	0		0	0	0	280	896	V9	2017-10-13 16:55:47	2017-10-13 16:55:47	0	NONE	DATA	0	---	---	NO	NO					NO	NO	NO	YES	0			YES
